# Supplementary material
Source: PubMed Central journal article supplement (PMC4294249)
Supplement: IAI.02764-14_zii999091051so1.pdf [file IAI.02764-14_zii999091051so1.pdf]

Figure S1. Heat map of selected, significant, differentially expressed genes of A2497 and A2497P infected cells versus mock infected control cells at 24, 48 and 72 h.

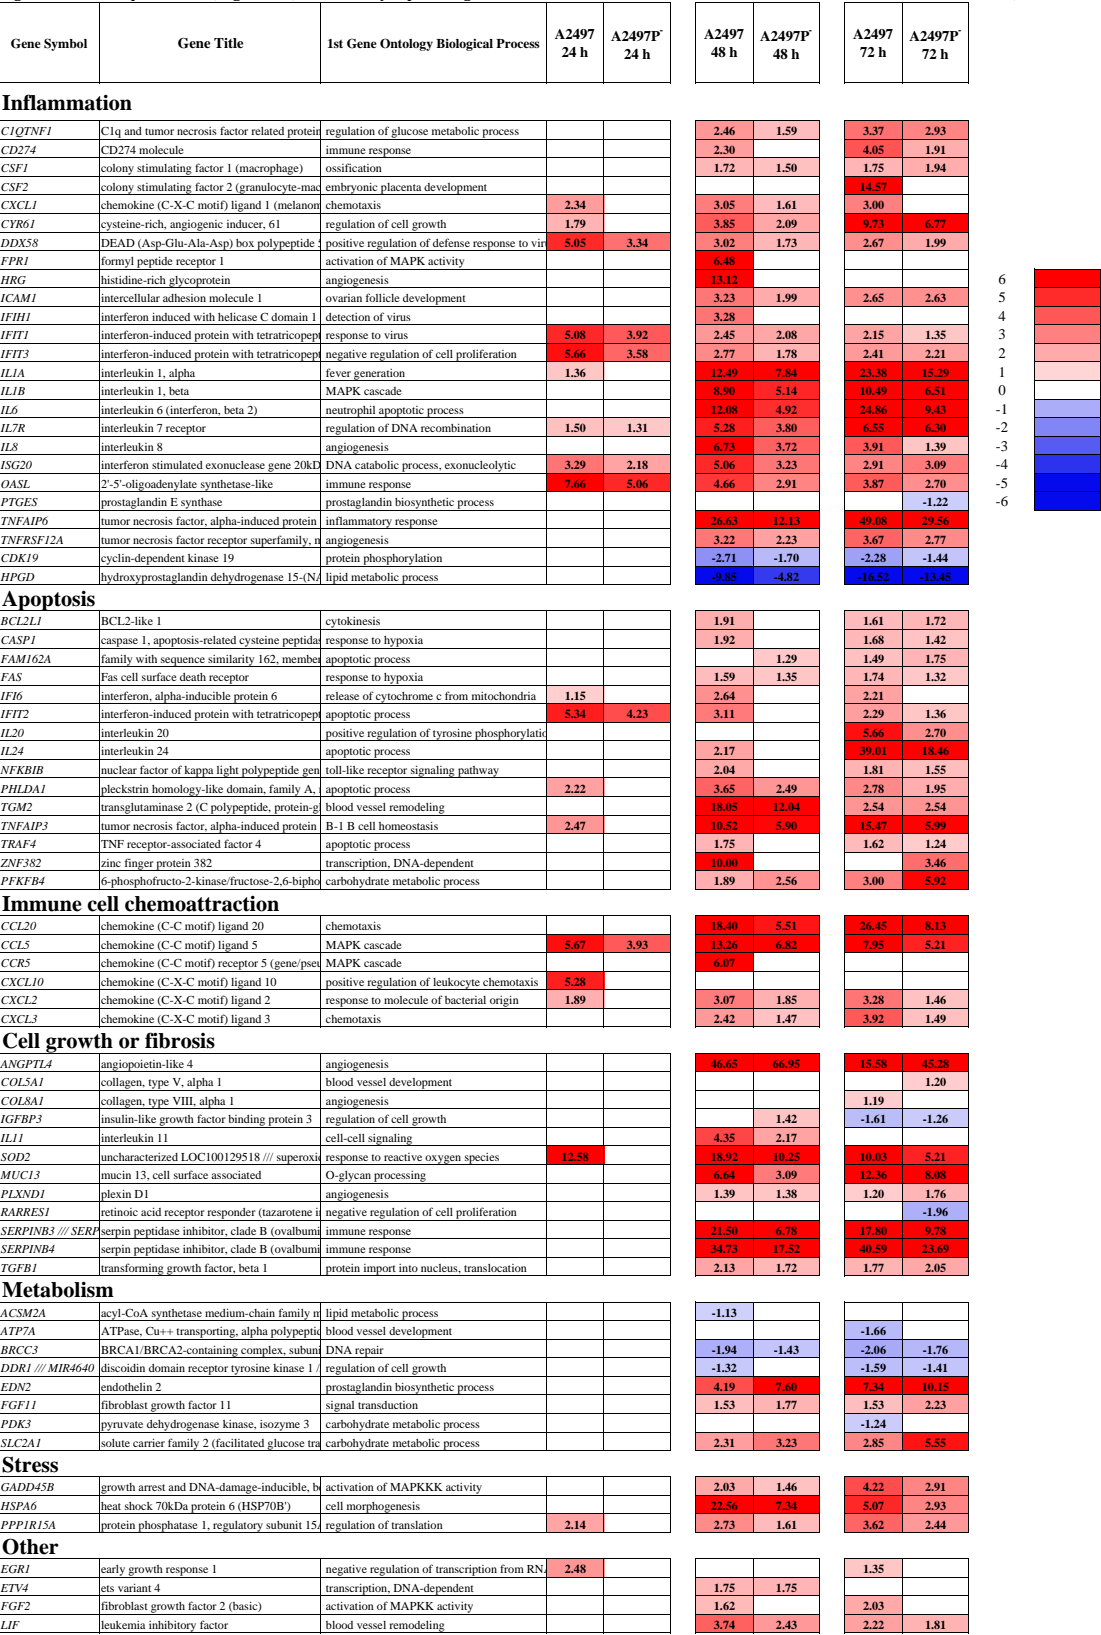

Supplemental FIG. S1. Heat map of selected, significant, differentially expressed genes of A2497 and A2497P infected cells versus mock infected control cells at 24, 48 and 72 h PI. Columns left to right are Gene symbol, Gene Title, Gene Ontology Biological Process, A2497 24 h, A2497P 24 h, A2497 48 h, A2497P 48 h, A2497 72 h, A2497P 72 h. Genes are arranged in categories based upon annotation. The color code on the right shows fold changes from blue to red (-6 to 6). Blank cells are time points for genes that showed no significant differential expression (p ≥ 0.05). Those non-significant values are presented in Supplemental Table S1.

Figure S2.

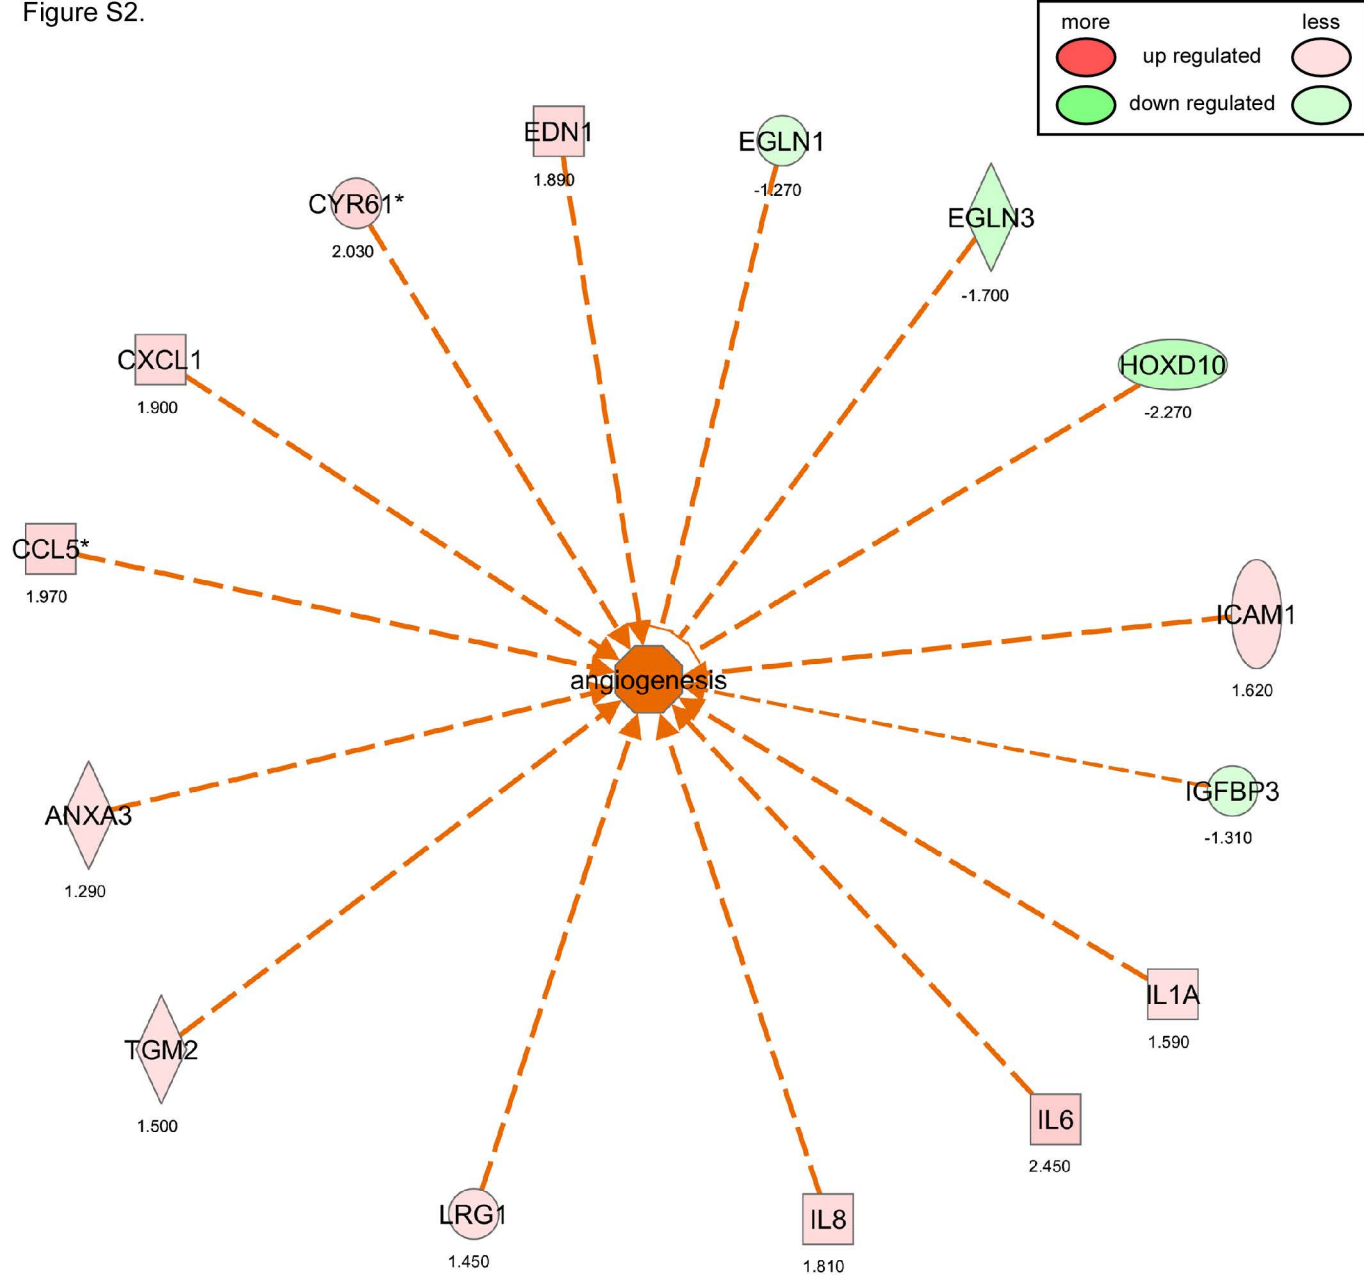

**Supplemental FIG. S2.** IPA angiogenesis pathway for A2497 vs. A2497P<sup>-</sup> infected cells at 48 h PI. Genes shown are those in the significant IPA category angiogenesis ( $p < 0.05$ ) and the interconnection that occurs by function and directionality of expression for this category. The key on the right provides a color indicator to denote directionality of expression. Numbers below gene boxes indicate fold level change in the gene in A2497 vs. A2497P<sup>-</sup> infected cells.

Figure S3.

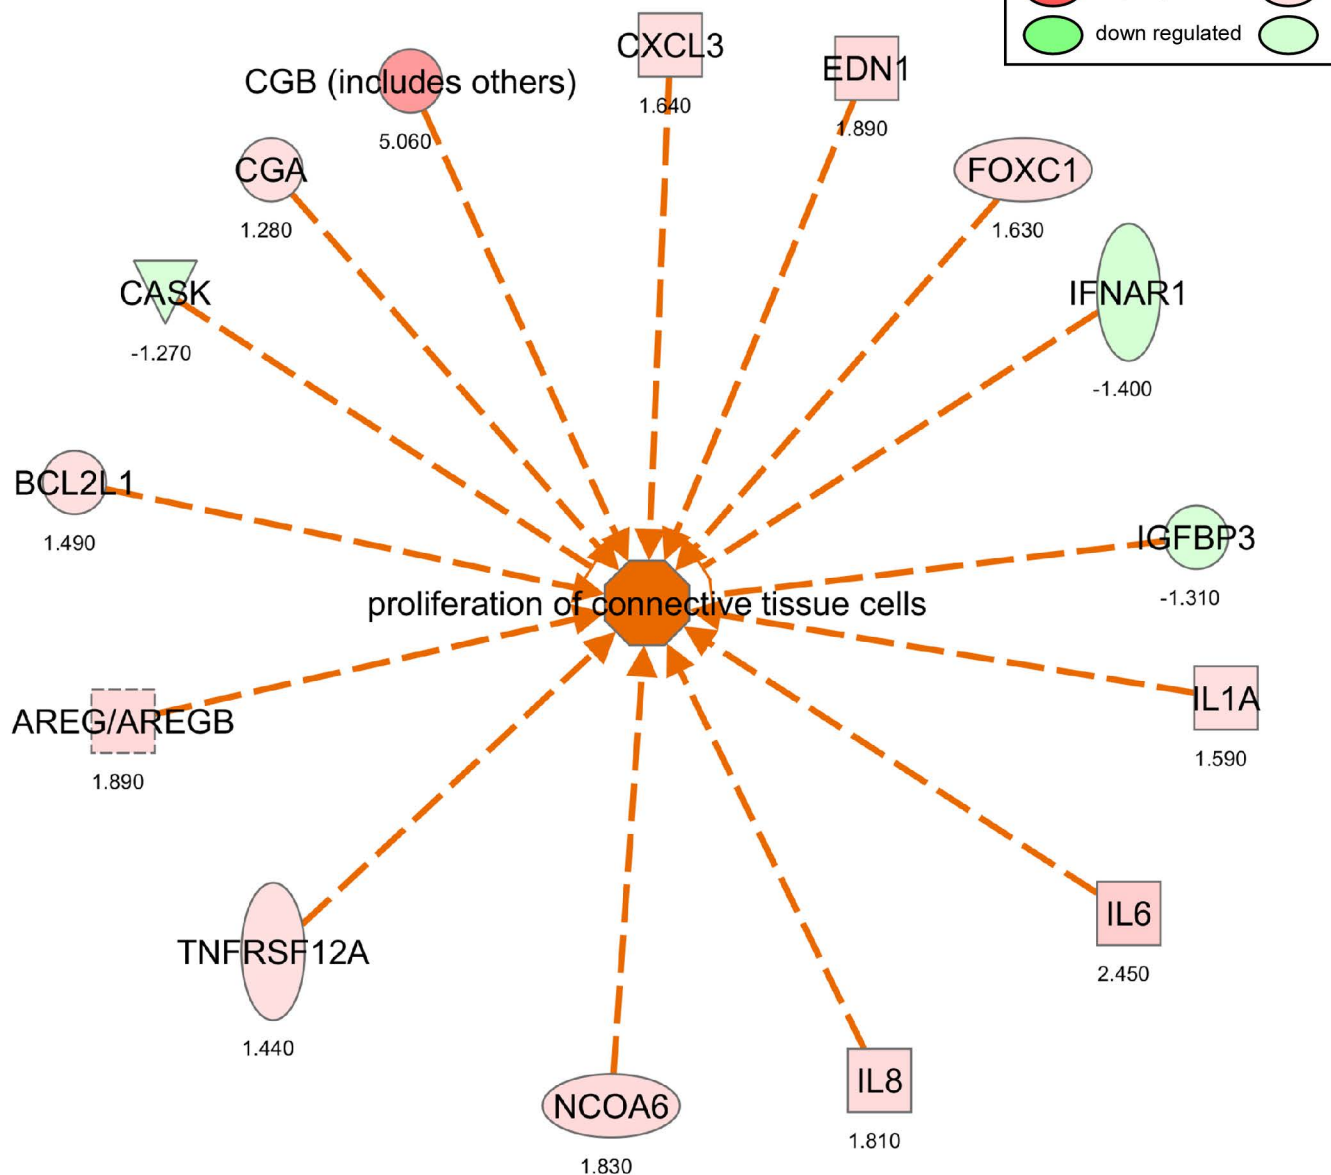

**Supplemental FIG. S3.** IP A proliferation of connective tissue cells pathway for A2497 vs. A2497P<sup>-</sup> infected cells at 48 h PI. Genes shown are those in the significant IP A category proliferation of connective tissue cells ( $p < 0.05$ ) and the interconnection that occurs by function and directionality of expression for genes in this category. The key on the right provides a color indicator to denote directionality of expression. Numbers below gene boxes indicate fold level change in the gene in A2497 vs. A2497P<sup>-</sup> infected cells.

**Supplemental Table S1.** Statistically significant differentially expressed genes for both A2497 and A2497P<sup>-</sup> infected cells vs mock at 30 min, 2, 4, 24, 48 and 72 h PI. The 19,248 differentially expressed genes for A2497 and A2497P<sup>-</sup> infected cells vs. mock infected cells at 24, 48 and 72 h PI are shown. Left to right columns include Gene Identification (ID), Gene title, chromosomal location in the HeLa 229 genome, 1<sup>st</sup> Gene Ontology category: Biological Process, Pathway, A2497 at 30 min, A2497P<sup>-</sup> at 30 min, A2497 at 2 h, A2497P<sup>-</sup> at 2 h, A2497 at 4 h, A2497P<sup>-</sup> at 4 h, A2497 at 24 h, A2497P<sup>-</sup> 24 h, A2497 at 48 h, A2497P<sup>-</sup> at 48 h, A2497 at 72 h, A2497P<sup>-</sup> at 72 h. Numbers in cells represent fold changes in gene expression for each gene at each time point. Numbers in italics are statistically significant ( $p \leq 0.05$ ) while non-italic numbers are not significant ( $p > 0.05$ ), but are included here for directionality purposes.

Table S1. Statistically significant differentially expressed genes for both A2497 and A2497P- infected cells vs mockt 30 mins, 2, 4, 24, 48 and 72 h PI.

| ID                  | Gene Title                              | Chromosomal Location     | 1st Gene Ontology Biological Process                | Pathway                                | A2497 30 mins | A2497P 30 mins | A2497 2 h | A2497P 2 h | A2497 4 h | A2497P 4 h | A2497 24 h | A2497P 24 h | A2497 48 h | A2497P 48 h | A2497 72 h | A2497P 72 h |
|---------------------|-----------------------------------------|--------------------------|-----------------------------------------------------|----------------------------------------|---------------|----------------|-----------|------------|-----------|------------|------------|-------------|------------|-------------|------------|-------------|
| A1BG-AS1            | A1BG antisense RNA 1                    | chr19q13.4               | 0                                                   | ---                                    | -1.06         | -1.42          | -1.33     | -1.72      | 1.01      | 1.02       | 1.24       | 1.23        | 1.01       | -1.29       | -1.95      | -1.24       |
| A1CF                | APOBEC1 complementation                 | chr10q11.23              | mRNA processing                                     | ---                                    | 1.12          | 1.84           | -1.09     | -2.13      | -1.28     | -1.24      | -1.57      | -1.45       | -1.86      | -2.05       | -1.19      | 1.69        |
| A2M                 | alpha-2-macroglobulin                   | chr12p13.31              | negative regulation of complement activation        | ---                                    | 1.12          | -1.03          | 1.02      | 1.19       | 1.09      | -1.01      | 1.22       | 1.15        | -1.28      | -1.22       | -1.89      | -1.46       |
| A2M-AS1             | A2M antisense RNA 1                     | chr12p13.31              | 0                                                   | ---                                    | 1.03          | -1.07          | -1.03     | 1.11       | 1.18      | -1.09      | -1.14      | -1.15       | -2.71      | -1.94       | -2.69      | -2.35       |
| A2MP1               | alpha-2-macroglobulin pseudogene        | chr12p13.31              | 0                                                   | ---                                    | 1.56          | 1.11           | 1.30      | -1.83      | 1.66      | 2.58       | -1.31      | 1.07        | -4.94      | -2.07       | -2.74      | -4.58       |
| A4GALT              | alpha 1,4-galactosyltransferase         | chr22q13.2               | protein glycosylation                               | ---                                    | 1.05          | -1.04          | -1.16     | 1.03       | 1.11      | -1.02      | 1.23       | 1.18        | 1.36       | 1.53        | 1.01       | 1.16        |
| AACSP1              | acetoacetyl-CoA synthetase              | chr5q35.3                | 0                                                   | ---                                    | 1.12          | -1.46          | 1.04      | -2.46      | 1.03      | -1.55      | -1.34      | -1.25       | 1.39       | 1.46        | 2.25       | 2.97        |
| AADAT               | aminoadipate aminotransferase           | chr4q33                  | 2-oxoglutarate metabolic process                    | ---                                    | -1.03         | -1.04          | 1.11      | -1.02      | 1.08      | -1.11      | -1.19      | -1.08       | -1.97      | -1.17       | -3.38      | -2.94       |
| AAGAB               | alpha- and gamma-adaptin                | chr15q22.33-q23          | transport                                           | ---                                    | -1.24         | -1.18          | 1.06      | 1.38       | 1.39      | 1.51       | 1.07       | -1.09       | 1.05       | -1.14       | -3.07      | -2.00       |
| AAK1                | AP2 associated kinase 1                 | chr2p14                  | protein phosphorylation                             | Fatty_Acid_Synthesis // GenMAPP        | 1.01          | -1.00          | -1.00     | -1.07      | 1.02      | 1.00       | -1.01      | 1.04        | -1.11      | 1.08        | -1.01      | 1.07        |
| AARS                | alanyl-tRNA synthetase                  | chr16q22                 | hair follicle development                           | ---                                    | -1.08         | -1.06          | 1.04      | 1.11       | 1.05      | -1.12      | 1.19       | 1.11        | 1.29       | 1.05        | 1.27       | 1.43        |
| AASDHPP1            | aminoadipate-semialdehyde dehydrogenase | chr11q22                 | fatty acid biosynthetic process                     | ---                                    | -1.19         | -1.17          | 1.06      | 1.08       | -1.02     | -1.18      | 1.08       | 1.14        | -1.22      | -1.28       | 1.62       | 1.36        |
| AASDHPP2            | aminoadipate-semialdehyde dehydrogenase | chr11q22                 | fatty acid biosynthetic process                     | ---                                    | 1.06          | -1.00          | 1.12      | 1.22       | 1.18      | 1.03       | -1.24      | -1.37       | -1.76      | -1.56       | -1.39      | -1.49       |
| ABAT                | 4-aminobutyrate aminotransferase        | chr16p13.2               | response to hypoxia                                 | ---                                    | -7.60         | -2.48          | 15.45     | 14.25      | -1.60     | -1.04      | 5.17       | 1.55        | 2.80       | 1.80        | 2.42       | 3.92        |
| ABAT                | 4-aminobutyrate aminotransferase        | chr16p13.2               | response to hypoxia                                 | ---                                    | -1.49         | -2.32          | 3.56      | 2.39       | -1.26     | -2.13      | -2.65      | -1.19       | 3.17       | 2.21        | 2.41       | 2.64        |
| ABCA1               | ATP-binding cassette, subfamily A       | chr9q31.1                | peptide secretion                                   | Statin_Pathway_PharmGKB // GenMAPP     | -1.38         | -1.25          | 1.27      | -1.03      | -1.33     | 1.64       | 1.25       | -1.08       | -1.53      | -1.15       | 1.76       | 1.73        |
| ABCA1               | ATP-binding cassette, subfamily A       | chr9q31.1                | peptide secretion                                   | Statin_Pathway_PharmGKB // GenMAPP     | -1.13         | -1.37          | 1.20      | -1.09      | -1.16     | -1.17      | -1.08      | 1.37        | -1.25      | -1.63       | 1.65       | -1.04       |
| ABCA17P             | ATP-binding cassette, subfamily A       | chr16p13.3               | 0                                                   | ---                                    | 1.85          | 1.54           | 1.06      | -1.20      | 1.04      | -1.47      | -1.57      | 1.39        | -1.05      | 1.11        | 1.66       | 1.87        |
| ABCA4               | ATP-binding cassette, subfamily A       | chr1p22                  | retinoid metabolic process                          | ---                                    | -1.17         | -1.07          | 1.04      | 1.12       | -1.53     | -1.31      | 1.11       | 1.39        | -1.05      | 1.03        | -3.80      | -4.24       |
| ABCA5               | ATP-binding cassette, subfamily A       | chr17q24.3               | negative regulation of macrophage development       | ---                                    | -1.18         | -1.33          | 1.76      | 1.16       | 1.00      | 1.09       | -1.48      | 1.04        | -1.19      | -1.05       | 1.22       | -1.10       |
| ABCA5               | ATP-binding cassette, subfamily A       | chr17q24.3               | ATP catabolic process                               | ---                                    | 1.37          | 1.24           | 1.06      | -1.15      | 1.17      | 1.06       | 1.24       | 1.13        | 1.30       | 1.10        | 1.57       | 1.26        |
| ABCA6               | ATP-binding cassette, subfamily A       | chr17q24.3               | ATP catabolic process                               | ---                                    | -3.82         | -1.60          | -1.26     | 1.10       | 1.87      | 1.15       | -1.60      | -1.33       | 1.02       | 1.52        | 1.60       | -2.43       |
| ABCA7               | ATP-binding cassette, subfamily A       | chr19p13.3               | ATP catabolic process                               | ---                                    | 1.01          | -1.06          | 1.15      | -1.00      | 1.03      | -1.10      | 1.55       | 1.12        | 1.35       | 1.38        | -1.13      | 1.10        |
| ABCA8               | ATP-binding cassette, subfamily A       | chr17q24                 | ATP catabolic process                               | ---                                    | 1.11          | 1.08           | 1.01      | -1.05      | -1.06     | -1.07      | -1.46      | -1.40       | -2.00      | -2.86       | -2.68      | -3.77       |
| ABCB1               | ATP-binding cassette, subfamily B       | chr7q21.12               | G2                                                  | ---                                    | 1.08          | 1.02           | 1.21      | 1.16       | 1.13      | 1.17       | -1.15      | 1.15        | -1.45      | -1.60       | 1.80       | 1.44        |
| ABCB1 /// ABCB10    | ATP-binding cassette, subfamily B       | chr7q21.1 /// chr7q21.12 | G2                                                  | ---                                    | 1.24          | 1.22           | 1.08      | 1.07       | 1.06      | -1.00      | -1.02      | -1.13       | -2.00      | -1.97       | 1.51       | 1.13        |
| ABCB10              | ATP-binding cassette, subfamily B       | chr7q21.13               | ATP catabolic process                               | ---                                    | 1.15          | 1.12           | 1.05      | -1.19      | -1.04     | -1.03      | -1.16      | -1.17       | -1.72      | -1.40       | -1.51      | -1.53       |
| ABCB6               | ATP-binding cassette, subfamily B       | chr2q36                  | autophagic vacuole assembly                         | ---                                    | -1.03         | -1.11          | 1.06      | 1.24       | 1.08      | -1.02      | 1.32       | 1.10        | 1.44       | 1.47        | -1.20      | 1.32        |
| ABCB8               | ATP-binding cassette, subfamily B       | chr7q36                  | ATP catabolic process                               | ---                                    | 1.27          | 1.19           | 1.01      | 1.32       | 1.09      | -1.07      | 1.01       | 1.00        | 1.52       | 1.99        | -1.21      | -1.48       |
| ABCB9               | ATP-binding cassette, subfamily B       | chr12q24                 | positive regulation of T cell mediated cytotoxicity | ---                                    | -1.30         | -1.69          | 1.23      | 1.05       | -1.03     | 1.06       | -1.16      | -1.14       | -1.43      | 1.74        | -1.82      | -1.28       |
| ABCC10              | ATP-binding cassette, subfamily C       | chr6p21.1                | ATP catabolic process                               | ---                                    | 1.08          | -1.02          | 1.01      | 1.03       | -1.12     | -1.18      | 1.08       | 1.30        | -1.32      | -1.84       | -1.87      | -1.44       |
| ABCC10              | ATP-binding cassette, subfamily C       | chr6p21.1                | ATP catabolic process                               | ---                                    | 1.09          | 1.06           | 1.03      | 1.15       | 1.13      | -1.22      | 1.21       | 1.40        | -1.40      | -1.72       | -1.59      | -1.23       |
| ABCC12              | ATP-binding cassette, subfamily C       | chr16q12.1               | ATP catabolic process                               | ---                                    | -1.07         | 3.34           | -1.58     | -2.43      | -4.13     | -1.48      | -2.20      | 2.08        | -1.06      | -1.82       | -8.06      | -2.29       |
| ABCC2               | ATP-binding cassette, subfamily C       | chr10q24                 | ATP catabolic process                               | Irinotecan_pathway_PharmGKB // GenMAPP | 1.05          | 1.32           | 1.00      | 1.10       | -1.24     | -1.41      | -1.57      | -1.10       | 2.02       | 1.03        | 1.76       | -1.14       |
| ABCC3               | ATP-binding cassette, subfamily C       | chr17q22                 | ATP catabolic process                               | ---                                    | -1.03         | -1.05          | 1.05      | 1.19       | 1.04      | -1.09      | 1.19       | 1.07        | 1.89       | 1.54        | 1.65       | 1.82        |
| ABCC3               | ATP-binding cassette, subfamily C       | chr17q22                 | ATP catabolic process                               | ---                                    | -1.02         | -1.16          | 1.06      | 1.04       | 1.03      | -1.15      | 1.20       | 1.16        | 1.06       | -1.10       | -1.56      | -1.50       |
| ABCC3               | ATP-binding cassette, subfamily C       | chr17q22                 | ATP catabolic process                               | ---                                    | 1.17          | 1.05           | 1.15      | 1.20       | 1.09      | -1.00      | 1.17       | -1.04       | 1.89       | 1.68        | 1.70       | 1.75        |
| ABCC4               | ATP-binding cassette, subfamily C       | chr13q32                 | platelet degranulation                              | ---                                    | 1.02          | 1.05           | 1.12      | -1.06      | 1.06      | 1.00       | -1.18      | -1.07       | -1.64      | -1.85       | -1.21      | -1.55       |
| ABCC4               | ATP-binding cassette, subfamily C       | chr13q32                 | platelet degranulation                              | ---                                    | -1.18         | -1.17          | 1.34      | 1.21       | 1.03      | -1.04      | 1.26       | 1.43        | 1.09       | 1.03        | 1.11       | -1.35       |
| ABCC4               | ATP-binding cassette, subfamily C       | chr13q32                 | platelet degranulation                              | ---                                    | 2.58          | 1.17           | -1.45     | 1.67       | -1.35     | 1.05       | 1.50       | 1.31        | 3.48       | 2.87        | 8.25       | 7.16        |
| ABCC5               | ATP-binding cassette, subfamily C       | chr3q27                  | carbohydrate metabolic process                      | ---                                    | -1.11         | -1.06          | -1.05     | 1.01       | 1.10      | 1.00       | -1.16      | -1.14       | -1.87      | -1.83       | -2.92      | -3.40       |
| ABCC6               | ATP-binding cassette, subfamily C       | chr16p13.1               | ATP catabolic process                               | ---                                    | -1.31         | -1.46          | 1.05      | 1.31       | 2.72      | -1.15      | 1.95       | 1.04        | 2.14       | 2.21        | -1.80      | -1.07       |
| ABCC6               | ATP-binding cassette, subfamily C       | chr16p13.1               | ATP catabolic process                               | ---                                    | 1.27          | 1.02           | 1.18      | 1.38       | 1.16      | -1.34      | -2.14      | -1.14       | -1.55      | -1.45       | -1.64      | -1.55       |
| ABCD3               | ATP-binding cassette, subfamily D       | chr1p21.3                | ATP catabolic process                               | ---                                    | 1.13          | 1.07           | -1.08     | -1.08      | -1.08     | 1.14       | -1.30      | -1.09       | -1.63      | -1.27       | -1.18      | -1.47       |
| ABCD4               | ATP-binding cassette, subfamily D       | chr14q24.3               | ATP catabolic process                               | ---                                    | 1.10          | 1.10           | 1.01      | 1.00       | 1.13      | 1.14       | 1.30       | 1.45        | -1.76      | -1.56       | -1.57      | -1.53       |
| ABCE1               | ATP-binding cassette, subfamily E       | chr4q31                  | ATP catabolic process                               | ---                                    | 1.02          | 1.04           | -1.08     | -1.05      | -1.05     | -1.06      | -1.02      | 1.25        | 1.25       | 1.25        | 1.59       | 1.51        |
| ABCF1               | ATP-binding cassette, subfamily F       | chr6p21.33               | ATP catabolic process                               | ---                                    | -1.06         | -1.11          | -1.08     | 1.01       | 1.07      | -1.02      | 1.04       | 1.07        | -1.02      | -1.08       | 1.06       | 1.08        |
| ABCF2               | ATP-binding cassette, subfamily F       | chr7q36                  | ATP catabolic process                               | ---                                    | 1.21          | 1.15           | -1.06     | 1.00       | -1.05     | 1.01       | -1.06      | -1.08       | -1.12      | -1.13       | -1.27      | -1.43       |
| ABCF2               | ATP-binding cassette, subfamily F       | chr7q36                  | ATP catabolic process                               | ---                                    | 1.35          | 1.46           | 1.09      | 1.53       | -1.81     | -1.20      | 3.21       | 3.29        | 3.43       | 2.01        | 3.26       | 4.07        |
| ABCF2               | ATP-binding cassette, subfamily F       | chr7q36                  | ATP catabolic process                               | ---                                    | 1.10          | 1.17           | -1.01     | -1.10      | 1.05      | -1.02      | 1.01       | -1.02       | 1.17       | 1.01        | 1.13       | 1.18        |
| ABCG1               | ATP-binding cassette, subfamily G       | chr21q22.3               | regulation of transcription, DNA-dependent          | ---                                    | -1.08         | -1.09          | -1.10     | 1.25       | -1.12     | -1.10      | 1.24       | 1.27        | 1.92       | 2.00        | 1.35       | 1.57        |
| ABCG1               | ATP-binding cassette, subfamily G       | chr21q22.3               | ATP catabolic process                               | ---                                    | -1.12         | -1.26          | 1.16      | 1.12       | 1.10      | -1.03      | 1.38       | 1.17        | -1.12      | -1.00       | 1.04       | 1.28        |
| ABHD12              | abhydrolase domain containing           | chr20p11.21              | metabolic process                                   | ---                                    | -1.03         | -1.02          | 1.05      | 1.18       | 1.03      | 1.05       | 1.19       | 1.06        | 1.13       | 1.22        | 1.29       | 1.42        |
| ABHD12B /// ABHD13  | abhydrolase domain containing           | chr14q22.1 /// chr4q22.1 | proteolysis                                         | ---                                    | 1.78          | 1.73           | 1.58      | -1.72      | -1.18     | -3.12      | 2.51       | -2.09       | -1.64      | 1.57        | -1.85      | 2.16        |
| ABHD13              | abhydrolase domain containing           | chr13q33.3               | 0                                                   | ---                                    | 1.26          | 1.17           | 1.12      | 1.07       | 1.15      | 1.31       | -1.17      | 1.15        | -1.56      | -1.75       | -1.47      | -1.55       |
| ABHD16A /// ABHD17B | abhydrolase domain containing           | chr6p21.3                | 0                                                   | ---                                    | -1.05         | -1.12          | 1.02      | 1.06       | 1.08      | 1.04       | 1.12       | -1.10       | -1.24      | -1.14       | 1.14       | 1.15        |
| ABHD17B             | abhydrolase domain containing           | chr9q21.13               | proteolysis                                         | ---                                    | -1.66         | 1.05           | -1.17     | -1.21      | -1.24     | -1.17      | -1.01      | -1.06       | 1.55       | 1.53        | 1.67       | 1.58        |
| ABHD17C             | abhydrolase domain containing           | chr15q25.1               | proteolysis                                         | ---                                    | 1.03          | 1.04           | -1.02     | 1.12       | -1.02     | -1.18      | -1.08      | -1.05       | 1.48       | 1.32        | 1.18       | -1.02       |
| ABHD2               | abhydrolase domain containing           | chr15q26.1               | response to wounding                                | ---                                    | -1.24         | -1.27          | -1.07     | -1.10      | -1.05     | -1.24      | 1.13       | 1.54        | -2.35      | -1.70       | 1.08       | 1.10        |
| ABHD3               | abhydrolase domain containing           | chr18q11.2               | 0                                                   | ---                                    | 1.24          | 1.15           | 1.03      | -1.12      | 1.07      | 1.21       | -1.24      | -1.08       | -2.03      | -1.66       | -1.28      | -1.61       |
| ABHD4               | abhydrolase domain containing           | chr14q11.2               | lipid metabolic process                             | ---                                    | -1.03         | -1.18          | -1.02     | 1.15       | 1.03      | 1.03       | -1.00      | 1.09        | 1.10       | -1.06       | 1.49       | 1.44        |
| ABHD5               | abhydrolase domain containing           | chr3p21                  | lipid metabolic process                             | ---                                    | -1.05         | 1.02           | 1.04      | -1.06      | -1.08     | 1.00       | -1.33      | -1.12       | -1.70      | -1.24       | -1.35      | -1.34       |
| ABHD6               | abhydrolase domain containing           | chr3p14.3                | metabolic process                                   | ---                                    | 1.05          | 1.06           | 1.08      | -1.08      | 1.03      | -1.07      | 1.05       | 1.01        | -1.25      | -1.11       | -1.17      | -1.07       |
| ABHD6               | abhydrolase domain containing           | chr3p14.3                | metabolic process                                   | ---                                    | -1.04         | 1.01           | -1.01     | -1.00      | 1.07      | 1.00       | 1.07       | 1.04        | -1.10      | -1.15       | -1.22      | -1.24       |
| ABI1                | abi-interactor 1                        | chr10p11.2               | somitogenesis                                       | ---                                    | 1.08          | 1.16           | 1.18      | 1.03       | -1.10     | -1.07      | -1.14      | -1.13       | 1.24       | 1.47        | 1.33       | 1.11        |

| ID          | Gene Title                    | Chromosomal Location | 1st Gene Ontology Biological Process      | Pathway                         | A2497 30 mins | A2497P' 30 mins | A2497 2 h | A2497P' 2 h | A2497 4 h | A2497P' 4 h | A2497 24 h | A2497P' 24 h | A2497 48 h | A2497P' 48 h | A2497 72 h | A2497P' 72 h |
|-------------|-------------------------------|----------------------|-------------------------------------------|---------------------------------|---------------|-----------------|-----------|-------------|-----------|-------------|------------|--------------|------------|--------------|------------|--------------|
| ABI2        | abl-interactor 2              | chr2q33              | cellular component movement               | ---                             | 1.10          | 1.16            | -1.05     | -1.24       | -1.02     | 1.19        | -1.01      | -1.13        | -1.10      | 1.02         | 1.10       | 1.01         |
| ABI2        | abl-interactor 2              | chr2q33              | cellular component movement               | ---                             | 1.15          | 1.16            | 1.22      | 1.06        | 1.02      | 1.04        | -1.02      | 1.16         | 1.06       | -1.01        | -1.25      | -1.26        |
| ABI3        | ABI family, member 3          | chr17q21.3           | cellular component movement               | ---                             | -1.47         | -1.52           | 1.30      | 2.27        | 1.91      | 1.33        | 1.00       | 1.01         | 5.09       | 5.16         | -1.62      | -1.02        |
| ABL1        | c-abl oncogene 1, non-rec     | chr9q34.1            | regulation of transcription involved in S | Cell_cycle_KEGG // GenMAPP      | -1.01         | -1.01           | -1.02     | -1.08       | 1.04      | 1.06        | 1.06       | -1.10        | 1.41       | 1.59         | 1.28       | 1.32         |
| ABL2        | v-abl Abelson murine leuke    | chr1q25.2            | cellular protein modification process     | ---                             | 1.25          | 1.42            | 1.03      | -1.14       | -1.14     | -1.18       | 1.15       | -1.05        | 1.47       | 1.23         | 1.75       | 1.39         |
| ABL2        | v-abl Abelson murine leuke    | chr1q25.2            | cellular protein modification process     | ---                             | 1.08          | 1.01            | 1.04      | 1.16        | 1.13      | -1.03       | 1.71       | 1.52         | 3.33       | 2.86         | 3.22       | 2.82         |
| ABL2        | v-abl Abelson murine leuke    | chr1q25.2            | cellular protein modification process     | ---                             | -1.05         | 1.05            | -1.07     | -1.33       | 1.01      | 1.13        | -1.20      | -1.06        | 1.19       | 1.34         | 1.54       | 1.51         |
| ABLM1       | actin binding LIM protein     | chr10q25             | cytoskeleton organization                 | ---                             | -1.03         | -1.06           | 1.07      | 1.06        | 1.00      | -1.04       | 1.01       | -1.06        | -1.20      | -1.12        | -1.36      | -1.29        |
| ABLM1       | actin binding LIM protein     | chr10q25             | cytoskeleton organization                 | ---                             | -1.04         | -1.03           | 1.03      | -1.05       | -1.03     | -1.05       | -1.10      | -1.08        | -1.13      | 1.03         | -1.48      | -1.38        |
| ABLM2       | actin binding LIM protein     | chr4p16.1            | cytoskeleton organization                 | ---                             | -1.20         | -1.28           | 1.11      | 1.18        | 1.22      | 1.12        | 1.90       | 1.42         | 1.92       | 1.53         | 2.00       | 1.85         |
| ABR         | active BCR-related            | chr17p13.3           | apoptotic process                         | ---                             | 1.03          | 1.17            | -1.27     | -1.40       | -1.12     | -1.19       | -1.06      | -1.16        | -1.75      | -1.45        | -1.49      | -1.14        |
| ABR         | active BCR-related            | chr17p13.3           | apoptotic process                         | ---                             | 1.03          | 1.05            | -1.02     | -1.01       | 1.18      | -1.05       | 1.08       | -1.03        | -1.70      | -1.52        | -1.46      | -1.59        |
| ABRACL      | ABRA C-terminal like          | chr6q24.1            | 0                                         | ---                             | 1.00          | -1.01           | -1.04     | 1.01        | 1.03      | 1.01        | -1.16      | 1.08         | -1.04      | 1.01         | -1.19      | -1.24        |
| ABT1        | activator of basal transcript | chr6p22.2            | transcription, DNA-dependent              | ---                             | -1.06         | 1.01            | 1.01      | -1.06       | 1.03      | 1.06        | 1.19       | 1.01         | 1.32       | 1.17         | 1.13       | 1.13         |
| ABTB1       | ankyrin repeat and BTB (P     | chr3q21              | 0                                         | ---                             | -1.11         | 1.01            | -1.05     | 1.15        | 1.21      | 1.22        | 1.06       | -1.00        | 1.17       | 1.07         | 1.20       | 1.42         |
| ABTB1       | ankyrin repeat and BTB (P     | chr3q21              | translation                               | ---                             | -1.17         | -1.08           | 1.35      | -1.00       | 1.10      | 1.03        | -1.14      | 1.02         | 1.02       | 1.14         | 1.48       | 1.46         |
| ABTB2       | ankyrin repeat and BTB (P     | chr11p13             | regulation of cell growth                 | ---                             | -1.02         | 1.16            | 1.06      | -1.06       | 1.15      | -1.06       | 1.10       | 1.13         | 1.77       | 1.38         | 1.39       | 1.36         |
| AC000123.3  | NULL /// NULL                 | ---                  | 0                                         | ---                             | 1.06          | 1.02            | -1.11     | -1.16       | -1.07     | -1.01       | -1.17      | 1.04         | 1.32       | 1.38         | 1.06       | 1.07         |
| AC002463.3  | NULL /// NULL                 | ---                  | 0                                         | ---                             | -1.79         | -1.58           | -2.74     | 1.29        | 1.68      | 1.21        | 3.94       | 2.78         | -3.76      | -1.37        | -1.59      | -4.59        |
| AC003973.4  | NULL /// NULL                 | ---                  | 0                                         | ---                             | -1.43         | 1.71            | 1.49      | 1.85        | -2.58     | -2.56       | 1.26       | -1.96        | -1.18      | -1.21        | 1.33       | 1.67         |
| AC004009.2  | NULL /// NULL                 | ---                  | 0                                         | ---                             | -1.44         | -2.60           | -1.78     | -1.29       | 1.37      | 1.31        | -11.74     | -1.04        | 1.38       | -1.22        | 1.12       | -1.20        |
| AC004237.1  | NULL /// NULL                 | ---                  | 0                                         | ---                             | -1.88         | -2.81           | -1.28     | 1.11        | -3.17     | -2.64       | 1.22       | 1.38         | 4.74       | 2.74         | -2.79      | 1.17         |
| AC004951.6  | NULL /// NULL                 | ---                  | 0                                         | ---                             | 1.05          | -1.12           | -1.03     | -1.00       | 1.29      | 1.23        | 1.04       | 1.11         | -1.45      | -1.43        | -1.45      | -1.25        |
| AC005062.2  | NULL /// NULL                 | ---                  | 0                                         | ---                             | 11.05         | 17.88           | 1.09      | 1.21        | -2.15     | -1.24       | 1.21       | -1.01        | 3.45       | 2.25         | 3.29       | 4.63         |
| AC005224.2  | NULL /// NULL                 | ---                  | 0                                         | ---                             | -1.38         | -1.12           | 1.11      | 1.10        | -1.20     | -1.18       | -1.28      | -1.52        | -2.17      | -2.38        | -1.20      | -1.15        |
| AC005593.1  | NULL /// NULL                 | ---                  | 0                                         | ---                             | 1.10          | 1.37            | 1.36      | 1.05        | -1.20     | -1.12       | 1.43       | 1.36         | 2.41       | 1.42         | 2.17       | 1.67         |
| AC005943.5  | NULL /// NULL                 | ---                  | 0                                         | ---                             | 1.04          | -1.02           | -1.08     | -1.09       | 1.08      | -1.06       | -1.35      | -1.15        | -2.18      | -2.07        | -2.17      | -2.57        |
| AC006538.1  | NULL /// NULL                 | ---                  | 0                                         | ---                             | -1.12         | -1.46           | -1.29     | -1.19       | -3.16     | -1.59       | 1.39       | -1.05        | 3.56       | 1.75         | 1.59       | 1.79         |
| AC007228.11 | NULL /// NULL                 | ---                  | 0                                         | ---                             | 1.52          | 2.18            | -3.33     | -1.26       | -1.53     | -1.31       | -3.06      | -1.40        | 2.13       | 2.64         | -2.12      | -1.03        |
| AC007359.6  | NULL /// NULL /// NULL        | ---                  | 0                                         | ---                             | 4.10          | 2.43            | -1.95     | -3.29       | -1.28     | 1.61        | -2.71      | 1.50         | 8.09       | 4.26         | 2.15       | 1.26         |
| AC007365.3  | NULL /// NULL                 | ---                  | 0                                         | ---                             | -1.19         | -4.01           | 1.30      | -1.48       | -1.19     | 1.02        | 1.16       | 2.84         | 1.57       | 1.37         | 1.41       | 1.70         |
| AC007401.2  | NULL /// NULL                 | ---                  | 0                                         | ---                             | 2.34          | 1.83            | -1.02     | -1.01       | 1.03      | -1.00       | 1.37       | 1.07         | 1.00       | 1.16         | 1.39       | 1.47         |
| AC007405.4  | NULL /// NULL                 | ---                  | 0                                         | ---                             | -1.04         | 1.56            | -1.19     | -1.29       | -1.28     | -1.13       | -1.90      | -1.77        | -1.51      | 1.14         | 1.32       | 1.66         |
| AC007557.2  | NULL /// NULL                 | ---                  | 0                                         | ---                             | 1.83          | -1.05           | -1.60     | 1.35        | -1.42     | -2.14       | -1.79      | 1.32         | -1.86      | 1.30         | 1.64       | 1.57         |
| AC007967.3  | NULL /// NULL /// NULL        | ---                  | 0                                         | ---                             | -3.15         | -2.42           | -2.18     | -1.00       | -1.33     | 2.49        | -3.94      | -3.03        | -1.13      | -1.67        | -1.00      | 2.36         |
| AC008746.12 | NULL /// NULL                 | ---                  | 0                                         | ---                             | -2.96         | -1.49           | 1.31      | 1.03        | 1.40      | 1.41        | -1.05      | -1.19        | -2.10      | -2.44        | -2.27      | -2.23        |
| AC009120.6  | NULL /// NULL                 | ---                  | 0                                         | ---                             | -1.13         | -1.08           | 1.02      | 1.04        | 1.12      | 1.00        | 1.16       | 1.07         | 1.44       | 1.19         | 1.34       | 1.35         |
| AC009299.2  | NULL /// NULL                 | ---                  | 0                                         | ---                             | 1.07          | -1.13           | 1.08      | -1.42       | -2.09     | -1.21       | 1.23       | -1.11        | -1.44      | -1.31        | -1.62      | -2.67        |
| AC009948.5  | NULL /// NULL                 | ---                  | 0                                         | ---                             | 1.19          | -1.03           | 1.11      | 1.06        | 1.01      | 1.33        | -1.36      | -1.08        | -3.77      | -2.58        | -3.26      | -3.01        |
| AC010744.1  | NULL /// NULL                 | ---                  | 0                                         | ---                             | 1.46          | 1.22            | -1.82     | -1.98       | 1.98      | 1.18        | -3.11      | -1.15        | -1.87      | 1.01         | 2.86       | 6.08         |
| AC012146.7  | NULL /// NULL                 | ---                  | 0                                         | ---                             | -1.22         | -1.14           | 1.19      | 1.69        | 1.08      | -1.22       | -1.14      | -1.40        | 1.32       | 1.16         | 2.84       | 1.60         |
| AC012146.7  | NULL /// NULL                 | ---                  | 0                                         | ---                             | 1.06          | -1.02           | 1.07      | 1.07        | -1.07     | -1.25       | 1.19       | 1.24         | 1.58       | 1.23         | 1.98       | 1.96         |
| AC012146.7  | NULL /// NULL                 | ---                  | 0                                         | ---                             | -1.16         | -1.33           | -1.08     | 1.03        | -1.01     | -1.12       | 1.01       | 1.22         | 1.54       | 1.26         | 1.71       | 1.79         |
| AC012361.1  | NULL /// NULL                 | ---                  | 0                                         | ---                             | 1.71          | 1.15            | 2.12      | -1.91       | 2.01      | -2.60       | 1.20       | 2.27         | 3.92       | 3.82         | -1.67      | -1.10        |
| AC013733.4  | NULL /// NULL                 | ---                  | 0                                         | ---                             | 2.64          | 1.21            | 1.97      | 2.15        | -2.04     | -5.59       | -1.21      | 1.02         | 3.04       | 1.10         | 5.64       | 8.86         |
| AC016909.1  | NULL /// NULL                 | ---                  | 0                                         | ---                             | 1.30          | 1.24            | -1.10     | -1.23       | 1.23      | -1.06       | -1.26      | -1.48        | -3.67      | -2.71        | -1.94      | -1.68        |
| AC017002.2  | NULL /// NULL                 | ---                  | 0                                         | ---                             | 1.39          | 1.06            | 1.06      | 1.07        | 1.60      | 1.56        | 1.66       | 1.21         | 1.19       | 1.05         | -1.96      | -1.54        |
| AC018755.16 | NULL /// NULL                 | ---                  | 0                                         | ---                             | -1.46         | -1.35           | 1.67      | 1.40        | -1.37     | -1.09       | -1.33      | -1.19        | 1.67       | 1.11         | -1.02      | -1.35        |
| AC020956.3  | NULL /// NULL                 | ---                  | 0                                         | ---                             | -1.10         | 1.31            | -1.64     | -3.08       | 1.08      | 1.28        | 1.23       | 1.24         | 5.05       | 7.71         | 2.57       | 3.18         |
| AC027269.2  | NULL /// NULL                 | ---                  | 0                                         | ---                             | 1.81          | 1.66            | -1.46     | -2.10       | -2.58     | -1.23       | 1.26       | 1.45         | 3.67       | 2.01         | 4.18       | -1.84        |
| AC068535.4  | NULL /// NULL                 | ---                  | 0                                         | ---                             | -1.19         | -1.69           | 1.30      | 1.08        | -3.05     | -1.48       | -1.40      | -1.22        | 1.91       | -1.37        | 3.73       | 1.55         |
| AC069277.2  | NULL /// NULL                 | ---                  | 0                                         | ---                             | 1.08          | -1.03           | -1.07     | -1.07       | 1.05      | 1.06        | 1.04       | 1.02         | -1.12      | 1.06         | -2.14      | -2.02        |
| AC069278.4  | NULL /// NULL                 | ---                  | 0                                         | ---                             | 1.26          | -1.04           | -1.12     | 1.00        | -1.33     | -1.15       | -1.66      | 1.29         | -4.24      | -3.15        | -1.72      | -1.35        |
| AC073321.4  | NULL /// NULL                 | ---                  | 0                                         | ---                             | 1.18          | 1.12            | -1.07     | 1.01        | 1.02      | 1.05        | -1.02      | 1.12         | 1.98       | 1.93         | 1.90       | 1.70         |
| AC074389.9  | NULL /// NULL                 | ---                  | 0                                         | ---                             | 1.03          | 1.05            | 1.03      | 1.20        | 1.07      | 1.05        | 1.26       | 1.40         | -1.57      | -1.34        | -1.96      | -1.71        |
| AC079767.4  | NULL /// NULL                 | ---                  | 0                                         | ---                             | 1.35          | 2.02            | -1.19     | -1.54       | 1.34      | 2.76        | 1.07       | 1.60         | 5.15       | 2.24         | 1.22       | -1.17        |
| AC083843.1  | NULL /// NULL                 | ---                  | 0                                         | ---                             | 1.27          | 1.47            | -1.67     | -2.57       | 1.16      | -1.15       | 1.46       | 2.29         | -2.41      | -1.59        | -1.24      | -2.07        |
| AC083884.8  | NULL /// NULL                 | ---                  | 0                                         | ---                             | 1.05          | 1.02            | -1.14     | -1.10       | 1.08      | 1.12        | -1.20      | 1.02         | -1.51      | -1.34        | -1.83      | -1.57        |
| AC092155.4  | NULL /// NULL                 | ---                  | 0                                         | ---                             | 1.31          | 1.58            | 3.12      | -1.71       | -7.28     | -2.30       | -1.68      | 10.74        | 1.92       | 2.39         | 1.02       | 1.88         |
| AC100830.4  | NULL /// NULL                 | ---                  | 0                                         | ---                             | -1.28         | -1.56           | -1.16     | -1.04       | 1.71      | 1.40        | -1.68      | 1.05         | -3.04      | -2.87        | -1.93      | -2.04        |
| AC104667.3  | NULL /// NULL                 | ---                  | 0                                         | ---                             | 1.18          | 1.25            | -1.79     | 1.07        | 1.49      | 1.55        | 1.24       | -1.05        | -7.03      | -3.51        | -2.10      | -1.30        |
| AC105402.4  | NULL /// NULL                 | ---                  | 0                                         | ---                             | 1.15          | 2.30            | -1.26     | -2.76       | 1.09      | -3.93       | -1.81      | -1.12        | -2.79      | -1.42        | 2.45       | 9.55         |
| AC139100.2  | NULL /// NULL                 | ---                  | 0                                         | ---                             | 1.00          | 1.19            | -1.22     | -1.22       | -1.11     | -1.01       | -1.19      | -1.26        | 1.46       | 1.48         | 1.28       | 1.43         |
| AC145343.2  | NULL /// NULL /// NULL        | ---                  | 0                                         | ---                             | 1.12          | 1.36            | -1.19     | 1.11        | 1.69      | 1.28        | -1.05      | -1.12        | -1.12      | -1.10        | 1.23       | 1.60         |
| ACAA2       | acetyl-CoA acyltransferase    | chr18q21.1           | acetyl-CoA metabolic process              | ---                             | -1.05         | -1.02           | 1.02      | 1.10        | 1.01      | -1.09       | 1.15       | 1.08         | 1.25       | 1.04         | -1.32      | -1.15        |
| ACAA2       | acetyl-CoA carboxylase al     | chr17q21             | tissue homeostasis                        | Fatty_Acid_Synthesis // GenMAPP | -1.07         | -1.04           | -1.03     | 1.05        | -1.04     | -1.01       | 1.04       | 1.10         | 1.17       | 1.22         | 1.21       | 1.34         |

| ID                          | Gene Title                                                                                               | Chromosomal Location                   | 1st Gene Ontology Biological Process                                          | Pathway                                           | A2497 30 mins           | A2497P' 30 mins         | A2497 2 h              | A2497P' 2 h            | A2497 4 h               | A2497P' 4 h            | A2497 24 h              | A2497P' 24 h            | A2497 48 h              | A2497P' 48 h            | A2497 72 h              | A2497P' 72 h            |
|-----------------------------|----------------------------------------------------------------------------------------------------------|----------------------------------------|-------------------------------------------------------------------------------|---------------------------------------------------|-------------------------|-------------------------|------------------------|------------------------|-------------------------|------------------------|-------------------------|-------------------------|-------------------------|-------------------------|-------------------------|-------------------------|
| ACACA                       | acetyl-CoA carboxylase alpha                                                                             | chr17q21                               | tissue homeostasis                                                            | Fatty_Acid_Synthesis // GenMAPP                   | 1.06                    | 1.08                    | 1.05                   | 1.19                   | 1.09                    | 1.05                   | -1.33                   | -1.23                   | 1.02                    | 1.02                    | 2.02                    | 1.87                    |
| ACACB                       | acetyl-CoA carboxylase beta                                                                              | chr12q24.1                             | acetyl-CoA metabolic process                                                  | Fatty_Acid_Synthesis // GenMAPP                   | -1.12                   | -1.16                   | -1.14                  | 1.03                   | -1.03                   | 1.07                   | 1.09                    | 1.18                    | -1.92                   | -1.56                   | -1.93                   | -1.78                   |
| ACACB                       | acetyl-CoA carboxylase beta                                                                              | chr12q24.1                             | acetyl-CoA metabolic process                                                  | Fatty_Acid_Synthesis // GenMAPP                   | -1.07                   | -1.22                   | 1.07                   | 1.06                   | 1.11                    | 1.02                   | -1.03                   | 1.05                    | -1.99                   | -1.77                   | -2.14                   | -1.88                   |
| ACACB                       | acetyl-CoA carboxylase beta                                                                              | chr12q24.1                             | acetyl-CoA metabolic process                                                  | Fatty_Acid_Synthesis // GenMAPP                   | -1.08                   | -1.22                   | 1.08                   | 1.07                   | 1.06                    | 1.03                   | -1.04                   | 1.13                    | -2.11                   | -1.97                   | -2.15                   | -1.81                   |
| ACADM                       | acyl-CoA dehydrogenase                                                                                   | chr3q21.3                              | metabolic process                                                             | ---                                               | 1.02                    | -1.05                   | -1.02                  | 1.20                   | -1.01                   | -1.04                  | 1.11                    | 1.12                    | 1.02                    | -1.01                   | -1.58                   | -1.39                   |
| ACADM                       | acyl-CoA dehydrogenase                                                                                   | chr1p31                                | liver development                                                             | Fatty_Acid_Degradation // GenMAPP // Mi           | 1.31                    | 1.27                    | 1.03                   | 1.05                   | -1.29                   | 1.16                   | -1.46                   | -1.12                   | -1.99                   | -1.83                   | -2.60                   | -3.40                   |
| ACADSB                      | acyl-CoA dehydrogenase                                                                                   | chr10q26.13                            | lipid metabolic process                                                       | Fatty_Acid_Degradation // GenMAPP                 | 1.43                    | 1.33                    | 1.07                   | -1.28                  | -1.03                   | -1.26                  | -1.13                   | -1.12                   | -5.51                   | -4.60                   | -6.86                   | -5.88                   |
| ACADSB                      | acyl-CoA dehydrogenase                                                                                   | chr10q26.13                            | lipid metabolic process                                                       | Fatty_Acid_Degradation // GenMAPP                 | 1.16                    | 1.06                    | 1.27                   | 1.25                   | 1.08                    | -1.06                  | 1.08                    | -1.21                   | -1.05                   | 1.15                    | -2.80                   | -4.06                   |
| ACADVL                      | acyl-CoA dehydrogenase                                                                                   | chr17p13.1                             | temperature homeostasis                                                       | Fatty_Acid_Degradation // GenMAPP // Mi           | 1.01                    | -1.07                   | 1.08                   | 1.24                   | 1.07                    | -1.06                  | 1.30                    | 1.12                    | 1.51                    | 1.24                    | 1.25                    | 1.43                    |
| ACAP2                       | ArfGAP with coiled-coil                                                                                  | chr3q29                                | regulation of ARF GTPase activity                                             | ---                                               | -1.04                   | -1.12                   | 1.01                   | 1.07                   | 1.04                    | 1.07                   | 1.20                    | 1.06                    | 1.45                    | 1.35                    | 1.75                    | 1.50                    |
| ACAT1                       | acetyl-CoA acetyltransferase                                                                             | chr11q22.3                             | liver development                                                             | Synthesis_and_Degradation_of_Keton_Bodi           | 1.04                    | 1.09                    | -1.01                  | -1.15                  | -1.07                   | -1.08                  | 1.08                    | 1.10                    | -1.04                   | -1.05                   | -1.25                   | -1.30                   |
| ACAT2                       | acetyl-CoA acetyltransferase                                                                             | chr6q25.3                              | lipid metabolic process                                                       | ---                                               | -1.05                   | -1.05                   | -1.06                  | -1.01                  | 1.05                    | 1.04                   | 1.14                    | 1.05                    | 1.62                    | 1.48                    | 2.58                    | 2.86                    |
| ACBD3                       | acyl-CoA binding domain                                                                                  | chr14q2.12                             | lipid metabolic process                                                       | ---                                               | 1.04                    | 1.10                    | -1.13                  | -1.16                  | -1.23                   | -1.08                  | -1.16                   | -1.01                   | 1.10                    | 1.35                    | 1.29                    | 1.21                    |
| ACBD3                       | acyl-CoA binding domain                                                                                  | chr14q2.12                             | lipid metabolic process                                                       | ---                                               | 1.11                    | 1.10                    | 1.07                   | 1.14                   | -1.13                   | -1.08                  | -1.13                   | 1.18                    | 1.41                    | 1.25                    | 1.43                    | 1.53                    |
| ACBD6                       | acyl-CoA binding domain                                                                                  | chr14q25.1                             | 0                                                                             | ---                                               | 1.02                    | 1.02                    | -1.11                  | 1.02                   | 1.01                    | -1.10                  | 1.26                    | 1.16                    | -1.06                   | -1.19                   | -1.17                   | -1.26                   |
| ACCS                        | 1-aminocyclopropane-1-carboxylate                                                                        | chr11p11                               | biosynthetic process                                                          | ---                                               | -1.19                   | 1.04                    | 1.30                   | 1.81                   | -1.09                   | -1.11                  | 1.10                    | 1.01                    | -1.03                   | 1.04                    | -2.23                   | -1.98                   |
| ACE                         | angiotensin I converting enzyme                                                                          | chr17q23.3                             | kidney development                                                            | ACE-Inhibitor_pathway_PharmGKB // Gen             | 1.06                    | 1.98                    | 1.63                   | -2.97                  | 1.72                    | -1.83                  | -1.69                   | -3.36                   | -4.00                   | -2.88                   | 1.18                    | -1.61                   |
| ACER3                       | alkaline ceramidase 3                                                                                    | chr11q13.5                             | phospholipid metabolic process                                                | ---                                               | 1.21                    | 1.27                    | 1.09                   | 1.11                   | 1.08                    | 1.20                   | 1.10                    | -1.04                   | 1.59                    | 1.73                    | 1.66                    | 1.49                    |
| ACLY                        | ATP citrate lyase                                                                                        | chr17q21.2                             | citrate metabolic process                                                     | Fatty_Acid_Synthesis // GenMAPP                   | -1.29                   | -1.23                   | -1.02                  | 1.04                   | 1.04                    | -1.08                  | 1.06                    | -1.03                   | 1.57                    | 1.45                    | 1.87                    | 2.12                    |
| ACLY                        | ATP citrate lyase                                                                                        | chr17q21.2                             | citrate metabolic process                                                     | Fatty_Acid_Synthesis // GenMAPP                   | -1.12                   | -1.08                   | 1.01                   | 1.14                   | 1.06                    | -1.04                  | 1.14                    | 1.07                    | 1.66                    | 1.41                    | 2.44                    | 2.54                    |
| ACMSD                       | aminocarboxymuconate semialdehyde lyase                                                                  | chr2p21.3                              | tryptophan catabolic process                                                  | ---                                               | -1.44                   | 2.05                    | -1.13                  | 3.62                   | -1.25                   | -1.79                  | 1.25                    | 1.42                    | -1.11                   | -1.54                   | 1.04                    | 7.97                    |
| ACO1                        | aconitase 1, soluble                                                                                     | chr9p21.1                              | tricarboxylic acid cycle                                                      | ---                                               | 1.04                    | 1.08                    | 1.05                   | 1.04                   | 1.06                    | 1.08                   | -1.05                   | 1.01                    | 1.38                    | 1.38                    | 1.50                    | 1.38                    |
| ACO2                        | aconitase 2, mitochondrial                                                                               | chr22q13.2                             | generation of precursor metabolites and                                       | Krebs-TCA_Cycle // GenMAPP                        | -1.05                   | -1.07                   | 1.04                   | 1.15                   | 1.18                    | 1.05                   | 1.12                    | 1.03                    | 1.34                    | 1.22                    | 1.11                    | 1.21                    |
| ACOT1 // ACOT11             | acyl-CoA thioesterase 1 // acyl-CoA thioesterase 11                                                      | chr14q24.3 // chr1p32.3                | very long-chain fatty acid metabolic process // fatty acid metabolic process  | ---                                               | 1.04                    | -1.01                   | 1.00                   | -1.12                  | 1.03                    | 1.04                   | -1.02                   | -1.11                   | -1.49                   | -1.39                   | -1.63                   | -1.46                   |
| ACOT7                       | acyl-CoA thioesterase 7                                                                                  | chr1p36                                | lipid metabolic process                                                       | ---                                               | -1.28                   | 1.09                    | -1.65                  | -1.14                  | 1.56                    | 2.06                   | -1.09                   | 1.13                    | 1.21                    | 1.49                    | -1.91                   | -1.85                   |
| ACOT9                       | acyl-CoA thioesterase 9                                                                                  | chrXp22.11                             | acyl-CoA metabolic process                                                    | ---                                               | -1.04                   | -1.03                   | -1.02                  | -1.03                  | 1.12                    | -1.06                  | 1.14                    | 1.12                    | 1.30                    | 1.13                    | -1.28                   | -1.20                   |
| ACOX1                       | acyl-CoA oxidase 1, palmitoyl                                                                            | chr17q25.1                             | very long-chain fatty acid metabolic process                                  | ---                                               | -1.02                   | -1.04                   | 1.04                   | 1.11                   | 1.10                    | 1.01                   | 1.16                    | 1.01                    | 1.31                    | 1.18                    | 1.21                    | 1.17                    |
| ACOX1                       | acyl-CoA oxidase 1, palmitoyl                                                                            | chr17q25.1                             | very long-chain fatty acid metabolic process                                  | ---                                               | -1.11                   | -1.13                   | -1.01                  | -1.02                  | 1.01                    | 1.07                   | -1.31                   | -1.19                   | -1.41                   | -1.09                   | -1.12                   | 1.01                    |
| ACOX1                       | acyl-CoA oxidase 1, palmitoyl                                                                            | chr17q25.1                             | very long-chain fatty acid metabolic process                                  | ---                                               | -3.61                   | -2.74                   | -1.78                  | -1.05                  | -1.39                   | -1.06                  | 2.86                    | 2.16                    | 5.86                    | 4.63                    | 3.95                    | 2.21                    |
| ACPI                        | acid phosphatase 1, soluble                                                                              | chr2p25                                | protein dephosphorylation                                                     | ---                                               | -1.02                   | 1.02                    | -1.02                  | 1.02                   | 1.08                    | -1.08                  | 1.29                    | 1.11                    | 1.44                    | 1.36                    | 1.61                    | 1.51                    |
| ACPI                        | acid phosphatase 1, soluble                                                                              | chr2p25                                | protein dephosphorylation                                                     | ---                                               | -1.01                   | -1.00                   | 1.07                   | 1.01                   | 1.15                    | -1.04                  | 1.37                    | 1.04                    | 1.37                    | 1.20                    | 1.42                    | 1.34                    |
| ACP2                        | acid phosphatase 2, lysosomal                                                                            | chr11p11.211p12.2                      | skeletal system development                                                   | ---                                               | 1.01                    | -1.06                   | -1.05                  | 1.25                   | -1.00                   | -1.11                  | 1.10                    | 1.20                    | -1.10                   | -1.18                   | -1.48                   | -1.21                   |
| ACP6                        | acid phosphatase 6, lysosomal                                                                            | chr1q21                                | lipid metabolic process                                                       | ---                                               | 1.07                    | -1.10                   | 1.10                   | 1.07                   | 1.03                    | 1.04                   | 1.10                    | 1.08                    | -1.46                   | -1.39                   | -1.63                   | -1.40                   |
| ACPL2                       | acid phosphatase-like 2                                                                                  | chr3q23                                | 0                                                                             | ---                                               | 1.14                    | 1.03                    | 1.24                   | 1.30                   | 1.10                    | -1.07                  | -1.08                   | -1.03                   | -1.32                   | -1.38                   | -1.32                   | -1.56                   |
| ACSBG2                      | acyl-CoA synthetase bubbler                                                                              | chr19p13.3                             | long-chain fatty acid metabolic process                                       | ---                                               | 1.07                    | 1.41                    | 1.58                   | -1.18                  | -1.17                   | -1.44                  | -1.23                   | -1.08                   | -2.07                   | -2.11                   | -1.69                   | -1.29                   |
| ACSL1                       | acyl-CoA synthetase long-chain                                                                           | chr4q35                                | long-chain fatty acid metabolic process                                       | Fatty_Acid_Degradation // GenMAPP // Mi           | 1.07                    | 1.16                    | 1.21                   | 1.17                   | 1.10                    | -1.15                  | -1.41                   | -1.42                   | -1.07                   | -1.00                   | 1.40                    | 1.07                    |
| ACSL1                       | acyl-CoA synthetase long-chain                                                                           | chr4q35                                | long-chain fatty acid metabolic process                                       | Fatty_Acid_Degradation // GenMAPP // Mi           | 1.08                    | 1.03                    | -1.02                  | -1.06                  | 1.20                    | 1.07                   | -1.14                   | -1.08                   | -1.35                   | 1.02                    | 1.23                    | 1.08                    |
| ACSL5                       | acyl-CoA synthetase long-chain                                                                           | chr10q25.1-q25.2                       | long-chain fatty acid metabolic process                                       | Fatty_Acid_Degradation // GenMAPP                 | 1.00                    | 1.01                    | 1.18                   | 1.15                   | -1.02                   | -1.13                  | 1.24                    | 1.04                    | 1.72                    | 1.22                    | 1.73                    | 1.32                    |
| ACSL5                       | acyl-CoA synthetase long-chain                                                                           | chr10q25.1-q25.2                       | long-chain fatty acid metabolic process                                       | Fatty_Acid_Degradation // GenMAPP                 | -1.18                   | -1.20                   | 1.19                   | 1.16                   | 1.05                    | -1.06                  | -1.11                   | -1.10                   | 1.43                    | 1.14                    | 1.23                    | 1.08                    |
| ACSL6                       | acyl-CoA synthetase long-chain                                                                           | chr5q31                                | response to hypoxia                                                           | Fatty_Acid_Degradation // GenMAPP                 | 1.63                    | 1.01                    | -5.01                  | -1.22                  | 1.01                    | -1.38                  | -3.64                   | -4.47                   | 6.96                    | 5.73                    | 3.41                    | 4.14                    |
| ACSM2A                      | acyl-CoA synthetase medium-chain                                                                         | chr16p12.3                             | fatty acid metabolic process                                                  | ---                                               | -1.47                   | 1.21                    | 1.16                   | 1.06                   | -1.29                   | -3.55                  | -1.27                   | 1.38                    | 2.04                    | -6.73                   | 5.06                    | 4.15                    |
| ACSM2A                      | acyl-CoA synthetase medium-chain                                                                         | chr16p12.3                             | lipid metabolic process                                                       | ---                                               | 5.23                    | 2.60                    | 1.31                   | -1.59                  | 2.90                    | 2.04                   | 1.60                    | 3.06                    | -1.13                   | -1.36                   | -3.62                   | 1.71                    |
| ACSM2A // ACSM2A // ACSM3   | acyl-CoA synthetase medium-chain // acyl-CoA synthetase medium-chain // acyl-CoA synthetase medium-chain | chr16p12.3 // chr16p12.3 // chr16p13.1 | lipid metabolic process // lipid metabolic process // lipid metabolic process | ---                                               | -2.23 // 7.14 // -1.20  | -4.66 // 10.88 // 1.12  | -1.07 // -1.18 // 1.66 | -1.22 // -1.46 // 1.08 | -1.50 // -1.05 // -1.54 | 3.06 // -2.92 // -1.36 | -1.86 // 1.51 // -1.84  | -1.07 // 3.41 // 1.59   | 1.16 // 2.25 // -1.13   | -1.02 // -1.01 // -1.36 | -1.70 // 1.78 // 2.00   | 3.47 // 2.28 // 1.52    |
| ACSM3                       | acyl-CoA synthetase medium-chain                                                                         | chr16p13.1                             | lipid metabolic process                                                       | ---                                               | -1.18                   | -1.16                   | 1.05                   | -1.83                  | 3.47                    | -1.35                  | -1.66                   | -2.32                   | -1.01                   | -1.13                   | 1.53                    | 1.46                    |
| ACSS1                       | acyl-CoA synthetase short-chain                                                                          | chr20p11.23-p11.24                     | ethanol oxidation                                                             | ---                                               | 3.04                    | 2.26                    | -1.54                  | -6.24                  | -2.48                   | -2.16                  | 2.78                    | 6.28                    | 2.00                    | 1.38                    | 2.20                    | 1.85                    |
| ACSS2                       | acyl-CoA synthetase short-chain                                                                          | chr20q11.22                            | ethanol oxidation                                                             | ---                                               | 1.10                    | -1.08                   | -1.10                  | 1.05                   | 1.28                    | 1.18                   | 1.19                    | 1.02                    | 2.10                    | 1.75                    | 4.88                    | 5.83                    |
| ACSS3                       | acyl-CoA synthetase short-chain                                                                          | chr12q21.31                            | metabolic process                                                             | ---                                               | -4.12                   | -1.08                   | 1.06                   | -4.93                  | 1.71                    | 1.34                   | 1.07                    | 1.51                    | 4.07                    | 2.15                    | 1.33                    | 1.15                    |
| ACTA2                       | actin, alpha 2, smooth muscle                                                                            | chr10q23.3                             | apoptotic process                                                             | Smooth_muscle_contraction // GenMAPP //           | -1.12                   | -1.08                   | 1.20                   | 1.07                   | 1.07                    | 1.08                   | 1.07                    | -1.06                   | 1.09                    | -1.02                   | -2.12                   | -1.59                   |
| ACTG1                       | actin, gamma 1 pseudogene                                                                                | chr15q14                               | ATP catabolic process                                                         | Smooth_muscle_contraction // GenMAPP //           | 1.06                    | -1.01                   | 1.09                   | 1.27                   | -1.01                   | -1.11                  | -1.21                   | -1.14                   | -2.80                   | -2.40                   | -1.45                   | -2.45                   |
| ACTG1P4 // ACTG1P4 // ACTL8 | actin, gamma 1 pseudogene // actin, gamma 1 pseudogene // actin-like 8                                   | chr1p21 // chr1p21 // chr1p36.2-p35    | carbohydrate metabolic process // carbohydrate metabolic process // 0         | Calcium_regulation_in_cardiac_cells // GenMAPP // | -1.19 // -1.11 // -1.13 | -1.60 // -1.03 // -1.10 | 1.09 // -1.49 // 1.02  | 1.08 // 1.13 // 1.04   | 1.24 // 1.12 // 1.33    | -1.03 // 1.12 // 1.39  | -1.03 // -1.20 // -1.14 | -1.06 // -1.18 // -1.13 | -2.08 // -1.47 // -1.13 | -2.08 // -1.50 // -1.00 | -2.03 // -3.03 // -2.85 | -1.24 // -2.32 // -2.36 |
| ACTN1                       | actinin, alpha 1                                                                                         | chr14q2414q22-q22                      | platelet degranulation                                                        | ---                                               | -1.03                   | -1.03                   | -1.05                  | -1.12                  | -1.06                   | 1.06                   | -1.02                   | 1.06                    | 1.25                    | 1.34                    | 1.11                    | 1.10                    |
| ACTN1                       | actinin, alpha 1                                                                                         | chr14q2414q22-q22                      | platelet degranulation                                                        | ---                                               | -1.25                   | -1.07                   | 1.05                   | 1.05                   | 1.10                    | 1.07                   | 1.09                    | 1.07                    | 1.55                    | 1.38                    | 1.61                    | 1.78                    |
| ACTN1                       | actinin, alpha 1                                                                                         | chr14q2414q22-q22                      | platelet degranulation                                                        | ---                                               | -1.14                   | -1.15                   | 1.02                   | -1.02                  | 1.13                    | 1.02                   | 1.22                    | 1.01                    | 1.86                    | 1.54                    | 2.27                    | 2.56                    |
| ACTN2                       | actinin, alpha 2                                                                                         | chr14q2-q43                            | platelet degranulation                                                        | Striated_muscle_contraction // GenMAPP            | -1.66                   | -1.04                   | -1.42                  | -1.01                  | -1.65                   | -2.52                  | 3.31                    | 1.92                    | 6.53                    | 2.46                    | 1.23                    | -1.65                   |
| ACTR10                      | actin-related protein 10 homolog                                                                         | chr14q23.1                             | microtubule-based movement                                                    | ---                                               | -1.01                   | 1.05                    | -1.02                  | -1.04                  | 1.06                    | 1.01                   | -1.07                   | -1.00                   | -1.85                   | -1.57                   | -1.75                   | -1.84                   |
| ACTR1A                      | ARP1 actin-related protein                                                                               | chr10q24.32                            | G2                                                                            | ---                                               | -1.15                   | -1.14                   | 1.01                   | -1.01                  | 1.03                    | -1.04                  | -1.08                   | -1.08                   | 1.10                    | 1.03                    | 1.07                    | 1.22                    |
| ACTR1A                      | ARP1 actin-related protein                                                                               | chr10q24.32                            | G2                                                                            | ---                                               | -1.15                   | -1.10                   | -1.04                  | -1.03                  | 1.02                    | -1.05                  | 1.04                    | 1.05                    | 1.23                    | 1.22                    | -1.24                   | -1.19                   |
| ACTR2                       | ARP2 actin-related protein                                                                               | chr2p14                                | cellular component movement                                                   | ---                                               | -1.12                   | -1.17                   | 1.03                   | 1.04                   | 1.20                    | -1.04                  | 1.10                    | 1.10                    | -1.22                   | -1.05                   | 1.40                    | 1.14                    |
| ACTR2                       | ARP2 actin-related protein                                                                               | chr2p14                                | cellular component movement                                                   | ---                                               | -1.10                   | -1.13                   | 1.08                   | 1.06                   | 1.10                    | -1.09                  | 1.07                    | -1.03                   | 1.10                    | 1.11                    | 1.45                    | 1.30                    |
| ACTR3B                      | ARP3 actin-related protein                                                                               | chr7q36.1                              | regulation of actin filament polymerization                                   | ---                                               | -1.02                   | -1.05                   | -1.14                  | -1.03                  | 1.33                    | -1.03                  | -1.03                   | 1.13                    | 1.05                    | -1.04                   | 1.09                    | 1.31                    |
| ACTR3C                      | ARP3 actin-related protein                                                                               | chr7q36.1                              | regulation of actin filament polymerization                                   | ---                                               | -1.06                   | -1.12                   | -1.01                  | 1.19                   | 1.05                    | 1.07                   | 1.05                    | 1.17                    | 1.35                    | 1.40                    | -1.65                   | -1.54                   |
| ACTR8                       | ARP8 actin-related protein                                                                               | ---                                    | DNA repair                                                                    | ---                                               | 1.02                    | 1.09                    | 1.08                   | 1.00                   | -1.01                   | -1.05                  | -1.14                   | -1.28                   | -2.08                   | -1.72                   | -1.27                   | -1.22                   |

| ID         | Gene Title                   | Chromosomal Location | 1st Gene Ontology Biological Process    | Pathway                                    | A2497 30 mins | A2497P' 30 mins | A2497 2 h | A2497P' 2 h | A2497 4 h | A2497P' 4 h | A2497 24 h | A2497P' 24 h | A2497 48 h | A2497P' 48 h | A2497 72 h | A2497P' 72 h |
|------------|------------------------------|----------------------|-----------------------------------------|--------------------------------------------|---------------|-----------------|-----------|-------------|-----------|-------------|------------|--------------|------------|--------------|------------|--------------|
| ACTR8      | ARP8 actin-related protein   | ---                  | DNA repair                              | ---                                        | -1.18         | -1.12           | 1.01      | 1.18        | 1.04      | 1.01        | 1.11       | 1.14         | 1.08       | 1.04         | 1.31       | 1.41         |
| ACTRT3     | actin-related protein T3     | chr3q26.2            | 0                                       | ---                                        | 1.34          | 1.21            | 1.14      | 1.37        | -1.10     | -1.16       | -1.23      | 1.02         | -2.71      | -2.42        | -2.37      | -2.93        |
| ACVR1B     | activin A receptor, type IB  | chr12q13.1           | G1                                      | ---                                        | -1.04         | -1.11           | 1.01      | 1.05        | 1.11      | 1.00        | -1.01      | -1.09        | -1.16      | -1.21        | -1.05      | -1.07        |
| ACVR1C     | activin A receptor, type IC  | chr2q24.1            | response to dietary excess              | ---                                        | -1.05         | 1.45            | 1.41      | 1.78        | -3.92     | -1.13       | 1.49       | 1.46         | 6.45       | 2.58         | -1.28      | -1.01        |
| ACVR2A     | activin A receptor, type IIA | chr2q22.3            | gastrulation with mouth forming second  | ---                                        | -1.07         | -1.28           | 1.13      | 1.11        | 1.02      | -1.05       | 1.15       | 1.11         | -1.56      | -1.26        | -1.34      | 1.00         |
| ACVR2B     | activin A receptor, type IIA | chr2q22.3            | gastrulation with mouth forming second  | ---                                        | 1.03          | -1.03           | 1.05      | 1.00        | -1.09     | 1.08        | -1.36      | -1.10        | -1.80      | -1.37        | -1.92      | -1.95        |
| ACVR2B     | activin A receptor, type IIB | chr3p22              | skeletal system development             | ---                                        | 3.71          | 3.19            | 1.46      | 1.24        | 1.38      | 1.56        | 1.40       | 1.22         | -1.95      | -2.10        | -1.30      | 1.24         |
| ACVR2B     | activin A receptor, type IIB | chr3p22              | skeletal system development             | ---                                        | 1.01          | 1.01            | 1.14      | 1.12        | -1.00     | 1.01        | -1.09      | -1.01        | -1.47      | -1.43        | -1.10      | 1.01         |
| ACVR2B-AS  | ACVR2B antisense RNA 1       | chr3p22.2            | 0                                       | ---                                        | -1.24         | -1.23           | -1.13     | -1.57       | 1.60      | 1.16        | 1.11       | -1.23        | -2.25      | -1.35        | -2.10      | -1.81        |
| ACYP2      | acylphosphatase 2, muscle    | chr2p16.2            | phosphate-containing compound metabol   | ---                                        | -1.01         | 1.04            | -1.00     | -1.00       | 1.03      | -1.06       | -1.02      | -1.06        | -1.43      | -1.23        | -1.19      | -1.22        |
| ADA        | adenosine deaminase          | chr20q13.12          | response to hypoxia                     | ---                                        | 1.03          | 1.23            | 1.00      | 1.06        | 1.02      | -1.12       | 1.57       | 1.39         | 1.51       | 1.11         | 1.73       | 1.75         |
| ADA        | adenosine deaminase          | chr20q13.12          | response to hypoxia                     | ---                                        | 1.05          | -1.17           | 1.14      | 1.33        | -1.21     | -1.11       | 1.55       | 1.27         | 1.69       | 1.69         | 1.53       | 1.51         |
| ADAL       | adenosine deaminase-like     | chr15q15.3           | purine nucleobase metabolic process     | ---                                        | 1.07          | 1.07            | 1.11      | 1.13        | -1.01     | -1.05       | -1.04      | 1.04         | -1.35      | -1.57        | -1.24      | -1.12        |
| ADAM10     | ADAM metallopeptidase d      | chr15q22             | in utero embryonic development          | Hypertrophy_model // GenMAPP               | -1.02         | -1.02           | 1.04      | -1.04       | -1.12     | 1.01        | 1.32       | 1.25         | 1.45       | 1.36         | 1.78       | 1.98         |
| ADAM12     | ADAM metallopeptidase d      | chr10q26.3           | proteolysis                             | ---                                        | -1.50         | -1.50           | 1.03      | -1.17       | -1.13     | -1.67       | -1.18      | -1.14        | -2.68      | -2.61        | -2.44      | -4.62        |
| ADAM12     | ADAM metallopeptidase d      | chr10q26.3           | proteolysis                             | ---                                        | -1.06         | -1.08           | 1.06      | 1.10        | -1.02     | 1.01        | 1.13       | 1.14         | 1.10       | 1.23         | -1.42      | -1.32        |
| ADAM12     | ADAM metallopeptidase d      | chr10q26.3           | proteolysis                             | ---                                        | 1.08          | -1.04           | 1.05      | 1.03        | 1.02      | 1.03        | 1.06       | 1.07         | -1.07      | -1.02        | -1.81      | -1.82        |
| ADAM12 /// | ADAM metallopeptidase d      | chr10q26.2 /// chr10 | proteolysis                             | ---                                        | 1.25          | 1.16            | 1.03      | -1.03       | 1.04      | 1.12        | -1.03      | -1.04        | -1.08      | -1.03        | -1.47      | -1.60        |
| ADAM17     | ADAM metallopeptidase d      | chr2p25              | response to hypoxia                     | ---                                        | -1.03         | 1.06            | 1.07      | -1.05       | 1.03      | 1.06        | -1.10      | -1.08        | -1.01      | 1.11         | 1.24       | 1.16         |
| ADAM1A /// | ADAM metallopeptidase d      | ---                  | 0                                       | ---                                        | 1.08          | -1.10           | 1.03      | 1.41        | 1.02      | 1.04        | -1.39      | -1.33        | -2.57      | -2.12        | -4.08      | -2.72        |
| ADAM22     | ADAM metallopeptidase d      | chr7q21              | proteolysis                             | ---                                        | 1.11          | 1.41            | -1.04     | -1.27       | -1.04     | -1.01       | -1.19      | -1.72        | -1.53      | -2.52        | -2.69      | ---          |
| ADAM22     | ADAM metallopeptidase d      | chr7q21              | proteolysis                             | ---                                        | 1.29          | 1.36            | 1.42      | -1.23       | 1.13      | -1.15       | -1.30      | -1.42        | -1.29      | -1.10        | -1.83      | -2.37        |
| ADAM22     | ADAM metallopeptidase d      | chr7q21              | proteolysis                             | ---                                        | 1.39          | 1.15            | 1.07      | 1.08        | 1.04      | -1.12       | 1.57       | 1.36         | -1.11      | 1.12         | -2.17      | -2.11        |
| ADAM22     | ADAM metallopeptidase d      | chr7q21              | proteolysis                             | ---                                        | 1.11          | -1.16           | 1.14      | 1.49        | 1.02      | -1.06       | 1.07       | 1.03         | -1.48      | -1.14        | -2.25      | -2.13        |
| ADAM28     | ADAM metallopeptidase d      | chr8p21.2            | proteolysis                             | ---                                        | -37.33        | -2.32           | -2.14     | 2.25        | 1.49      | 7.95        | -4.56      | -1.06        | -1.12      | 1.13         | 7.77       | 4.63         |
| ADAM28     | ADAM metallopeptidase d      | chr8p21.2            | proteolysis                             | ---                                        | 1.01          | 1.89            | 1.36      | 1.12        | 1.34      | 1.06        | -1.53      | -1.52        | 2.18       | 4.52         | -1.50      | -1.45        |
| ADAM30     | ADAM metallopeptidase d      | chr1p12              | proteolysis                             | ---                                        | -1.54         | -8.12           | -1.22     | -1.01       | 2.53      | 2.06        | 1.96       | -3.38        | 1.44       | -2.90        | 3.52       | 1.56         |
| ADAM5      | ADAM metallopeptidase d      | chr8p11.22           | proteolysis                             | ---                                        | 1.31          | 1.76            | -1.26     | -1.17       | -1.45     | -1.63       | -1.54      | 1.16         | 1.31       | -1.53        | 1.06       | 1.72         |
| ADAM8      | ADAM metallopeptidase d      | chr10q26.3           | cell morphogenesis                      | ---                                        | -1.03         | -1.04           | -1.80     | -2.11       | -3.41     | 1.19        | 1.14       | 1.27         | -1.19      | -1.17        | 1.28       | -1.36        |
| ADAMTS1    | ADAM metallopeptidase w      | chr21q21.2           | ovulation from ovarian follicle         | ---                                        | 1.44          | 1.36            | 1.12      | 1.18        | -1.02     | 1.07        | 1.29       | 1.08         | 2.29       | 1.69         | 3.82       | 2.84         |
| ADAMTS1    | ADAM metallopeptidase w      | chr21q21.2           | ovulation from ovarian follicle         | ---                                        | 1.21          | 1.19            | -1.16     | 1.02        | 1.15      | 1.01        | 1.07       | 1.01         | 2.09       | 1.97         | 4.26       | 3.61         |
| ADAMTS3    | ADAM metallopeptidase w      | chr4q13.3            | proteolysis                             | ---                                        | 1.16          | -1.00           | 1.16      | 1.26        | -1.07     | 1.30        | -1.22      | -1.19        | -2.05      | -1.49        | -1.93      | -2.28        |
| ADAMTS5    | ADAM metallopeptidase w      | chr21q21.3           | proteolysis                             | ---                                        | 1.00          | -1.01           | 1.07      | 1.02        | 1.12      | 1.01        | -1.37      | -1.16        | -1.70      | -2.12        | -1.03      | -1.20        |
| ADAMTS5    | ADAM metallopeptidase w      | chr21q21.3           | proteolysis                             | ---                                        | 1.04          | -1.01           | 1.08      | -1.13       | -1.11     | 1.17        | -1.55      | -1.29        | -1.92      | -2.26        | -1.28      | -1.58        |
| ADAMTS5    | ADAM metallopeptidase w      | chr21q21.3           | proteolysis                             | ---                                        | -1.01         | -1.08           | 1.17      | 1.21        | 1.12      | -1.00       | -1.12      | -1.36        | -2.04      | -1.15        | -1.26      | ---          |
| ADAMTS6    | ADAM metallopeptidase w      | chr5q12              | proteolysis                             | ---                                        | 1.31          | 1.28            | 1.01      | -1.13       | -1.18     | -1.10       | -1.56      | -1.32        | 1.25       | -1.08        | 2.73       | 2.11         |
| ADAMTS6    | ADAM metallopeptidase w      | chr5q12              | proteolysis                             | ---                                        | 1.53          | 2.01            | 1.67      | -2.06       | -3.81     | 1.63        | -1.04      | 1.05         | -2.51      | 1.18         | 2.12       | 1.71         |
| ADAMTSL1   | ADAMTS-like 1                | chr9p21.3            | 0                                       | ---                                        | 1.46          | 1.34            | -1.20     | -2.37       | 1.34      | 1.63        | 1.18       | -1.08        | -1.56      | 1.31         | -2.09      | -2.10        |
| ADAMTSL1   | ADAMTS-like 1                | chr9p21.3            | 0                                       | ---                                        | -1.37         | -1.21           | 1.45      | 1.20        | 1.26      | -1.08       | 1.26       | 1.33         | -1.22      | -1.34        | -1.32      | -1.95        |
| ADAMTSL3   | ADAMTS-like 3                | chr15q25.2           | 0                                       | ---                                        | 1.76          | 1.00            | 1.08      | 1.00        | 2.40      | 1.08        | -1.07      | 3.51         | 2.98       | 1.55         | -1.25      | ---          |
| ADAMTSL4   | ADAMTS-like 4                | chr1q21.3            | apoptotic process                       | ---                                        | 1.31          | 1.09            | -1.23     | -1.04       | 1.49      | 1.57        | 1.22       | -1.04        | 2.30       | 1.66         | 1.88       | 2.19         |
| ADAP1      | ArlGAP with dual PH dom      | chr7p22.3            | cell surface receptor signaling pathway | ---                                        | 1.23          | -1.08           | 1.41      | 1.27        | 1.24      | -1.01       | 1.97       | 1.61         | 2.96       | 1.75         | 1.96       | 1.62         |
| ADAP1      | ArlGAP with dual PH dom      | chr7p22.3            | cell surface receptor signaling pathway | ---                                        | 1.18          | -1.04           | 1.03      | -1.07       | -1.03     | -1.12       | 1.35       | 1.24         | 2.29       | 1.83         | 1.48       | 1.43         |
| ADARB1     | adenosine deaminase, RNA     | chr21q22.3           | adenosine to inosine editing            | ---                                        | -1.09         | -1.13           | 1.06      | 1.19        | 1.07      | -1.04       | 1.12       | 1.07         | 1.22       | 1.14         | 1.11       | 1.16         |
| ADAT1      | adenosine deaminase, tRNA    | chr16q23.1           | RNA processing                          | ---                                        | -1.04         | -1.07           | -1.05     | -1.15       | -1.01     | -1.05       | -1.29      | -1.11        | -1.83      | -1.61        | -1.30      | -1.16        |
| ADAT2      | adenosine deaminase, tRNA    | chr6q24.2            | tRNA processing                         | ---                                        | -1.05         | -1.09           | 1.12      | 1.32        | 1.24      | 1.10        | 1.43       | 1.38         | 1.06       | -1.09        | 1.24       | 1.26         |
| ADCK1      | aarF domain containing kin   | chr14q24.3           | protein phosphorylation                 | ---                                        | -1.00         | -1.02           | 1.08      | 1.11        | 1.15      | -1.21       | 1.05       | 1.34         | -1.99      | -2.34        | -3.41      | -3.19        |
| ADCK2      | aarF domain containing kin   | chr7q34              | protein phosphorylation                 | ---                                        | 1.38          | 1.21            | 1.24      | -1.06       | 1.27      | 1.22        | -1.10      | -1.04        | -2.06      | -1.34        | -1.72      | -1.70        |
| ADCY1      | adenylate cyclase 1 (brain)  | chr7p13-p12          | energy reserve metabolic process        | Calcium_regulation_in_cardiac_cells // Gen | 2.59          | 2.56            | -2.18     | -1.00       | -2.66     | -1.71       | -2.69      | -2.50        | 2.52       | 2.01         | 1.23       | 3.76         |
| ADCY1      | adenylate cyclase 1 (brain)  | chr7p13-p12          | energy reserve metabolic process        | Calcium_regulation_in_cardiac_cells // Gen | 2.07          | 4.93            | -1.16     | 1.09        | -1.55     | -3.05       | 6.24       | 6.35         | 1.73       | -1.27        | -1.77      | -1.81        |
| ADCY2      | adenylate cyclase 2 (brain)  | chr5p15.3            | energy reserve metabolic process        | Calcium_regulation_in_cardiac_cells // Gen | 5.97          | 1.51            | 1.06      | -1.19       | 1.82      | -3.45       | -5.11      | 2.66         | -1.76      | -2.89        | 2.02       | 7.55         |
| ADCY3      | adenylate cyclase 3          | chr2p23.3            | energy reserve metabolic process        | Calcium_regulation_in_cardiac_cells // Gen | -1.09         | -1.14           | -1.00     | -1.23       | 1.03      | 1.05        | -1.05      | -1.09        | -1.16      | -1.20        | -1.21      | -1.12        |
| ADCY3      | adenylate cyclase 3          | chr2p23.3            | energy reserve metabolic process        | Calcium_regulation_in_cardiac_cells // Gen | 1.14          | 1.06            | 1.10      | 1.05        | 1.04      | 1.09        | -1.12      | -1.08        | -1.19      | -1.17        | -1.33      | -1.32        |
| ADCY6      | adenylate cyclase 6          | chr12q12-q13         | energy reserve metabolic process        | Calcium_regulation_in_cardiac_cells // Gen | 1.02          | -1.30           | 1.09      | 1.21        | -1.00     | 1.08        | 1.08       | -1.01        | 1.19       | 1.12         | 1.02       | 1.26         |
| ADCY9      | adenylate cyclase 9          | chr16p13.3           | energy reserve metabolic process        | Calcium_regulation_in_cardiac_cells // Gen | -1.02         | -1.07           | 1.07      | 1.05        | 1.02      | -1.16       | 1.14       | 1.19         | 1.49       | 1.09         | 1.20       | 1.38         |
| ADCY9      | adenylate cyclase 9          | chr16p13.3           | energy reserve metabolic process        | Calcium_regulation_in_cardiac_cells // Gen | 1.18          | 1.16            | 1.14      | -1.03       | -1.10     | -1.04       | -1.04      | -1.08        | -1.50      | -1.54        | -1.25      | -1.42        |
| ADD1       | adducin 1 (alpha)            | chr4p16.3            | cell morphogenesis                      | ---                                        | 1.03          | 1.08            | -1.15     | -1.38       | 1.08      | -1.01       | -1.09      | -1.26        | -1.19      | -1.22        | -1.42      | -1.53        |
| ADD1       | adducin 1 (alpha)            | chr4p16.3            | cell morphogenesis                      | ---                                        | 1.03          | 1.01            | 1.11      | 1.25        | -1.06     | -1.03       | -1.25      | -1.14        | -1.61      | -1.65        | -1.65      | -1.45        |
| ADD1       | adducin 1 (alpha)            | chr4p16.3            | cell morphogenesis                      | ---                                        | -1.02         | 1.02            | 1.03      | -1.15       | 1.05      | -1.10       | -1.10      | -1.07        | -1.79      | -1.83        | -1.74      | -1.71        |
| ADD3       | adducin 3 (gamma)            | chr10q25.2           | response to drug                        | ---                                        | -1.04         | -1.07           | 1.20      | 1.20        | 1.07      | 1.26        | -1.16      | 1.08         | -1.78      | -1.43        | -1.88      | -2.39        |
| ADD3       | adducin 3 (gamma)            | chr10q25.2           | 0                                       | ---                                        | 1.17          | 1.11            | 1.11      | 1.07        | -1.02     | 1.16        | 1.00       | -1.06        | -1.33      | -1.08        | -1.25      | -1.61        |
| ADD3       | adducin 3 (gamma)            | chr10q25.2           | response to drug                        | ---                                        | -1.17         | -1.21           | -1.01     | -1.08       | 1.01      | 1.14        | 1.03       | 1.22         | -1.49      | -1.28        | -1.76      | -1.59        |
| ADD3       | adducin 3 (gamma)            | chr10q25.2           | response to drug                        | ---                                        | -1.10         | -1.03           | 1.13      | 1.15        | -1.03     | 1.04        | -1.04      | 1.10         | -1.33      | -1.11        | -1.64      | -1.52        |
| ADH1B      | alcohol dehydrogenase 1B     | chr4q23              | ethanol oxidation                       | ---                                        | -1.10         | -1.23           | -1.77     | -7.47       | 1.18      | -1.61       | 1.06       | -1.08        | -3.78      | -2.91        | 8.09       | 8.78         |
| ADH1B      | alcohol dehydrogenase 1B     | chr4q23              | ethanol oxidation                       | ---                                        | 1.18          | -1.63           | 1.50      | 1.21        | 1.01      | 1.69        | -2.59      | -1.83        | -7.26      | -2.32        | 1.05       | 2.24         |
| ADH1B      | alcohol dehydrogenase 1B     | chr4q23              | ethanol oxidation                       | ---                                        | 1.24          | -1.28           | -2.74     | -2.49       | 4.00      | 4.36        | 1.62       | 2.78         | 1.16       | -1.10        | 1.25       | 1.07         |



| ID                   | Gene Title                                    | Chromosomal Location | 1st Gene Ontology Biological Process                                 | Pathway                                  | A2497 30 mins | A2497P' 30 mins | A2497 2 h | A2497P' 2 h | A2497 4 h | A2497P' 4 h | A2497 24 h | A2497P' 24 h | A2497 48 h | A2497P' 48 h | A2497 72 h | A2497P' 72 h |
|----------------------|-----------------------------------------------|----------------------|----------------------------------------------------------------------|------------------------------------------|---------------|-----------------|-----------|-------------|-----------|-------------|------------|--------------|------------|--------------|------------|--------------|
| AGPAT1               | 1-acylglycerol-3-phosphate                    | chr6p21.3            | positive regulation of cytokine production                           | ---                                      | 1.18          | 1.09            | -1.00     | 1.04        | 1.18      | 1.24        | -1.01      | -1.03        | -1.05      | -1.06        | -1.00      | 1.09         |
| AGPAT1               | 1-acylglycerol-3-phosphate                    | chr6p21.3            | positive regulation of cytokine production                           | ---                                      | 1.01          | 1.01            | 1.03      | -1.04       | 1.05      | 1.00        | -1.01      | -1.12        | 1.01       | -1.07        | 1.23       | 1.19         |
| AGPAT2               | 1-acylglycerol-3-phosphate                    | chr9q34.3            | positive regulation of cytokine production                           | ---                                      | 1.06          | 1.01            | -1.06     | -1.21       | -1.26     | -1.03       | 1.03       | -1.06        | 1.61       | 1.20         | 1.47       | 1.33         |
| AGPAT2               | 1-acylglycerol-3-phosphate                    | chr9q34.3            | positive regulation of cytokine production                           | ---                                      | -1.07         | -1.12           | -1.09     | -1.06       | -1.01     | -1.09       | -1.01      | -1.01        | 1.34       | 1.20         | 1.63       | 1.50         |
| AGPAT3               | 1-acylglycerol-3-phosphate                    | chr21q22.3           | lipid metabolic process                                              | ---                                      | -1.11         | -1.04           | -1.08     | -1.01       | 1.00      | -1.07       | -1.29      | -1.16        | -2.14      | -1.97        | -1.45      | -1.28        |
| AGPAT3               | 1-acylglycerol-3-phosphate                    | chr21q22.3           | lipid metabolic process                                              | ---                                      | -1.07         | -1.03           | 1.06      | 1.14        | 1.04      | -1.05       | -1.00      | 1.03         | 1.34       | 1.22         | 1.02       | 1.07         |
| AGPAT3               | 1-acylglycerol-3-phosphate                    | chr21q22.3           | lipid metabolic process                                              | ---                                      | -1.02         | -1.00           | 1.10      | 1.11        | 1.24      | 1.06        | -1.16      | -1.09        | -1.09      | -1.44        | 1.14       | 1.10         |
| AGPAT4               | 1-acylglycerol-3-phosphate                    | chr6q26              | lipid metabolic process                                              | ---                                      | -1.12         | -1.26           | 1.18      | 1.11        | 1.42      | 1.13        | -1.07      | -1.17        | 1.05       | 1.23         | 1.31       | 1.49         |
| AGPAT4               | 1-acylglycerol-3-phosphate                    | chr6q26              | lipid metabolic process                                              | ---                                      | -1.22         | -1.30           | 1.03      | 1.17        | 1.07      | -1.07       | 1.10       | 1.12         | -1.68      | -1.50        | -3.34      | -2.26        |
| AGPAT6               | 1-acylglycerol-3-phosphate                    | chr8p11.21           | glandular epithelial cell maturation                                 | ---                                      | -1.45         | -1.27           | -1.09     | -1.08       | 1.16      | -1.15       | -1.21      | 1.00         | -1.08      | -1.15        | -1.23      | -1.16        |
| AGPAT9               | 1-acylglycerol-3-phosphate                    | chr4q21.23           | lipid metabolic process                                              | ---                                      | 1.14          | 1.17            | 1.08      | -1.16       | -1.03     | 1.17        | -1.05      | -1.20        | 1.87       | 1.61         | -1.13      | -1.19        |
| AGPS                 | alkylglycerone phosphate                      | chr2q31.2            | lipid metabolic process                                              | ---                                      | 1.05          | 1.01            | 1.06      | 1.04        | 1.01      | 1.09        | -1.25      | -1.06        | -1.62      | -1.42        | -1.98      | -1.82        |
| AGPS                 | alkylglycerone phosphate                      | chr2q31.2            | lipid metabolic process                                              | ---                                      | 1.08          | -1.02           | 1.04      | -1.13       | -1.07     | 1.01        | 1.17       | 1.02         | 1.08       | 1.08         | 1.50       | 1.34         |
| AGPS                 | alkylglycerone phosphate                      | chr2q31.2            | lipid metabolic process                                              | ---                                      | 1.29          | 1.27            | 1.05      | -1.17       | -1.20     | -1.07       | -1.10      | 1.01         | -1.76      | -1.67        | -1.63      | -2.12        |
| AGPS                 | alkylglycerone phosphate                      | chr2q31.2            | lipid metabolic process                                              | ---                                      | -1.08         | 1.04            | 1.09      | 1.06        | 1.07      | 1.01        | -1.13      | -1.15        | -1.25      | -1.09        | -1.13      | -1.07        |
| AGR2                 | anterior gradient 2 homolog                   | chr7p21.3            | mucus secretion                                                      | ---                                      | 1.25          | 1.47            | -1.60     | -1.52       | 1.20      | 1.80        | 1.07       | -1.70        | -2.08      | -13.22       | -8.52      | ---          |
| AGRN                 | agrin                                         | chr1p36.33           | retinoid metabolic process                                           | ---                                      | -1.07         | -1.08           | -1.01     | 1.04        | 1.02      | -1.02       | 1.13       | 1.15         | 1.25       | 1.17         | 1.06       | 1.20         |
| AGRN                 | agrin                                         | chr1p36.33           | retinoid metabolic process                                           | ---                                      | -1.03         | -1.10           | 1.03      | 1.04        | 1.08      | 1.03        | 1.17       | 1.14         | 1.20       | 1.11         | 1.05       | 1.22         |
| AGTPBP1              | ATP/GTP binding protein                       | chr9q21.33           | eye photoreceptor cell differentiation                               | ---                                      | -1.04         | -1.16           | 1.52      | 1.24        | -1.27     | -1.04       | -1.63      | -1.58        | -1.93      | -1.49        | -1.58      | -1.35        |
| AGTR2                | angiotensin II receptor, type 2               | chr9q22-q23          | kidney development                                                   | ACE-Inhibitor pathway_PharMKB // GenMAPP | 1.00          | -1.01           | -1.09     | -1.03       | -1.07     | 1.27        | 1.30       | 1.21         | -1.54      | -1.13        | -2.21      | -2.02        |
| AGTRAP               | angiotensin II receptor-associated protein    | chr1p36.22           | response to hypoxia                                                  | ---                                      | 1.11          | -1.42           | -1.13     | -1.10       | -1.50     | -1.01       | 1.06       | 1.51         | 2.53       | 1.90         | 6.61       | 6.51         |
| AGTRAP               | angiotensin II receptor-associated protein    | chr1p36.22           | response to hypoxia                                                  | ---                                      | 1.03          | -1.11           | -1.04     | -1.01       | 1.04      | -1.07       | 1.11       | 1.07         | 1.65       | 1.28         | 1.71       | 1.73         |
| AGTRAP               | angiotensin II receptor-associated protein    | chr1p36.22           | response to hypoxia                                                  | MAPK_Cascade // GenMAPP                  | -1.16         | -1.30           | 1.03      | -1.02       | 1.16      | -1.02       | 1.02       | 1.12         | 1.39       | 1.28         | 1.65       | 1.68         |
| AGXT2                | alanine--glyoxylate aminotransferase          | chr5p13              | pyrimidine nucleobase metabolic process                              | ---                                      | -1.57         | -3.31           | -1.33     | 1.09        | 2.49      | 1.45        | -1.25      | -1.45        | 5.95       | 19.65        | -1.27      | -1.23        |
| AHCTF1               | AT hook containing transmembrane protein      | chr1q44              | M phase of mitotic cell cycle                                        | ---                                      | 1.05          | 1.14            | 1.05      | -1.09       | 1.02      | -1.12       | 1.08       | 1.04         | 1.14       | 1.11         | 1.63       | 1.40         |
| AHCYL2               | adenosylhomocysteine lyase                    | chr7q32.1            | one-carbon metabolic process                                         | ---                                      | 1.00          | -1.06           | 1.11      | 1.18        | 1.04      | 1.13        | -1.01      | -1.11        | -1.23      | 1.09         | -1.18      | -1.29        |
| AHI1                 | Abelson helper integration factor             | chr6q23.3            | morphogenesis of a polarized epithelium                              | ---                                      | 1.10          | 1.01            | 1.11      | 1.13        | 1.09      | 1.12        | 1.20       | -1.06        | 1.14       | 1.27         | 1.83       | 1.61         |
| AHI1                 | Abelson helper integration factor             | chr6q23.3            | morphogenesis of a polarized epithelium                              | ---                                      | -1.33         | 1.22            | -1.18     | -1.68       | 1.29      | 1.48        | 1.68       | 3.75         | -1.47      | -1.54        | -7.51      | -1.47        |
| AHI1                 | Abelson helper integration factor             | chr6q23.3            | morphogenesis of a polarized epithelium                              | ---                                      | 1.01          | 1.02            | -1.01     | -1.04       | 1.13      | 1.05        | 1.07       | 1.06         | -1.04      | -1.04        | -1.30      | -1.26        |
| AHNAK                | AHNAK nucleoprotein                           | chr11q12.2           | nervous system development                                           | ---                                      | -1.03         | -1.03           | -1.04     | -1.03       | -1.10     | -1.05       | -1.04      | -1.06        | -1.55      | -1.53        | -1.50      | -1.43        |
| AHNAK                | AHNAK nucleoprotein                           | chr11q12.2           | nervous system development                                           | ---                                      | -1.20         | -1.31           | 1.36      | 1.28        | 1.47      | 1.27        | 1.06       | 1.16         | -1.69      | -1.84        | -1.74      | -1.28        |
| AHNAK                | AHNAK nucleoprotein                           | chr11q12.2           | nervous system development                                           | ---                                      | 1.00          | -1.13           | -1.11     | -1.10       | -1.07     | -1.26       | 1.30       | 1.15         | 1.84       | 1.81         | 1.38       | 1.40         |
| AHNAK                | AHNAK nucleoprotein                           | chr11q12.2           | nervous system development                                           | ---                                      | -1.67         | 1.32            | 1.18      | 1.07        | 1.32      | 1.71        | -1.06      | 1.62         | 1.13       | 1.21         | -1.67      | -1.31        |
| AHNAK                | AHNAK nucleoprotein                           | chr11q12.2           | nervous system development                                           | ---                                      | -1.13         | 1.05            | -1.26     | -1.42       | -1.06     | 1.17        | -1.08      | -1.14        | -1.64      | -1.67        | -1.54      | -1.58        |
| AHNAK2               | AHNAK nucleoprotein 2                         | chr14q32.33          | 0                                                                    | ---                                      | 1.09          | -1.03           | 1.05      | 1.25        | -1.05     | -1.03       | 1.03       | 1.06         | -1.36      | -1.07        | -1.53      | 1.08         |
| AHNAK2               | AHNAK nucleoprotein 2                         | chr14q32.33          | 0                                                                    | ---                                      | -1.12         | -1.02           | 1.16      | 1.03        | 1.25      | 1.10        | 1.15       | -1.02        | -1.60      | -1.39        | -1.56      | -1.11        |
| AHRR                 | aryl-hydrocarbon receptor                     | chr5p15.3            | negative regulation of transcription from RNA polymerase II promoter | ---                                      | -1.08         | -1.02           | 1.06      | 1.02        | -1.22     | -1.00       | -1.22      | 1.20         | -2.75      | -2.32        | -1.60      | -1.74        |
| AICDA                | activation-induced cytidine deaminase         | chr12p13             | mRNA processing                                                      | ---                                      | 1.95          | 7.53            | 1.98      | -2.88       | -1.01     | 1.15        | 1.40       | -1.42        | 16.53      | 3.73         | 1.33       | -1.29        |
| AIF1L                | allograft inflammatory factor 1               | chr9q34.13-q34.3     | 0                                                                    | ---                                      | -1.09         | -1.26           | -1.21     | -1.09       | 1.09      | -1.12       | 1.01       | 1.02         | -1.36      | -1.39        | -1.80      | -1.97        |
| AIF1L                | allograft inflammatory factor 1               | chr9q34.13-q34.3     | 0                                                                    | ---                                      | -1.03         | -1.07           | 1.02      | -1.02       | 1.00      | 1.00        | 1.02       | 1.10         | -1.15      | -1.03        | -1.37      | -1.23        |
| AIFM2                | apoptosis-inducing factor, 2                  | chr10q22.1           | apoptotic process                                                    | ---                                      | -1.01         | -1.11           | 1.10      | 1.06        | 1.18      | 1.15        | 1.06       | 1.08         | 1.30       | 1.27         | 1.50       | 1.51         |
| AIFM2                | apoptosis-inducing factor, 2                  | chr10q22.1           | apoptotic process                                                    | ---                                      | 1.12          | -1.00           | -1.06     | 1.13        | 1.16      | 1.00        | 1.30       | 1.35         | 1.20       | 1.10         | 1.25       | 1.41         |
| AIFM3                | apoptosis-inducing factor, 3                  | chr22q11.21          | apoptotic process                                                    | ---                                      | -1.65         | -1.07           | 1.34      | 1.15        | 4.03      | 1.53        | 7.96       | 4.81         | 1.76       | 1.64         | -1.31      | -1.23        |
| AIG1                 | androgen-induced 1                            | chr6q24.2            | 0                                                                    | ---                                      | -1.03         | -1.09           | 1.01      | -1.02       | -1.02     | 1.03        | 1.06       | -1.11        | -1.20      | -1.10        | -1.73      | -1.77        |
| AIG1                 | androgen-induced 1                            | chr6q24.2            | 0                                                                    | ---                                      | 1.75          | 1.34            | -1.35     | -1.08       | -1.50     | -1.17       | 1.56       | 1.31         | 1.07       | 1.16         | 1.32       | 1.43         |
| AIM1                 | absent in melanoma 1                          | chr6q21              | 0                                                                    | ---                                      | 1.32          | 1.34            | -1.06     | -1.01       | -1.13     | -1.12       | -1.17      | 1.14         | -1.03      | 1.30         | 1.23       | 1.53         |
| AIM2                 | absent in melanoma 2                          | chr1q22              | activation of innate immune response                                 | ---                                      | 1.84          | 4.11            | -1.97     | 2.86        | 1.01      | -1.68       | 1.57       | 3.44         | 3.51       | 2.43         | 1.35       | 1.43         |
| AIMP1                | aminoacyl tRNA synthetase                     | chr4q24              | angiogenesis                                                         | ---                                      | 1.16          | 1.16            | -1.07     | -1.09       | -1.11     | 1.01        | -1.19      | -1.09        | -1.14      | -1.09        | -1.23      | -1.43        |
| AIMP1                | aminoacyl tRNA synthetase                     | chr4q24              | angiogenesis                                                         | ---                                      | 1.04          | 1.06            | 1.11      | 1.04        | 1.09      | 1.11        | -1.03      | -1.05        | 1.13       | 1.33         | -1.05      | -1.08        |
| AIMP2                | aminoacyl tRNA synthetase                     | chr7p22              | translation                                                          | Translation_Factors // GenMAPP           | -1.05         | -1.02           | -1.05     | -1.01       | -1.01     | -1.01       | -1.07      | -1.08        | -1.24      | -1.38        | -1.10      | -1.10        |
| AIMP2                | aminoacyl tRNA synthetase                     | chr7p22              | translation                                                          | Translation_Factors // GenMAPP           | -1.08         | -1.02           | -1.04     | -1.00       | -1.03     | -1.03       | -1.13      | -1.10        | -1.33      | -1.42        | -1.09      | -1.07        |
| AIP                  | aryl hydrocarbon receptor interacting protein | chr11q13.3           | protein peptidyl-prolyl isomerization                                | ---                                      | -1.11         | -1.21           | -1.03     | -1.02       | 1.10      | 1.01        | 1.17       | 1.10         | 1.17       | 1.29         | 1.51       | 1.70         |
| AIP                  | aryl hydrocarbon receptor interacting protein | chr11q13.3           | protein peptidyl-prolyl isomerization                                | ---                                      | -1.08         | -1.04           | -1.05     | -1.03       | 1.08      | -1.04       | 1.23       | -1.02        | 1.54       | 1.24         | 1.17       | 1.49         |
| AJUBA                | ajuba LIM protein                             | chr14q11.2           | negative regulation of transcription from RNA polymerase II promoter | ---                                      | 1.22          | 1.13            | 1.03      | -1.12       | -1.10     | 1.12        | -1.29      | -1.35        | -1.56      | -1.52        | -1.09      | -1.28        |
| AJUBA                | ajuba LIM protein                             | chr14q11.2           | negative regulation of transcription from RNA polymerase II promoter | ---                                      | 1.25          | 1.27            | 1.09      | -1.21       | -1.04     | 1.03        | -1.01      | -1.16        | -1.83      | -1.94        | -1.01      | -1.13        |
| AJUBA                | ajuba LIM protein                             | chr14q11.2           | negative regulation of transcription from RNA polymerase II promoter | ---                                      | -1.01         | -1.11           | 1.08      | 1.02        | -1.01     | -1.04       | 1.19       | 1.34         | -3.68      | -3.44        | -1.53      | -1.73        |
| AJUBA                | ajuba LIM protein                             | chr14q11.2           | negative regulation of transcription from RNA polymerase II promoter | ---                                      | -1.28         | -1.22           | -1.09     | 1.19        | -1.06     | 1.25        | 1.50       | 1.42         | 3.05       | 1.88         | 1.70       | 1.73         |
| AK1                  | adenylate kinase 1                            | chr9q34.1            | nucleobase-containing compound metabolic process                     | ---                                      | 1.01          | 1.08            | 1.08      | -1.31       | 1.14      | -1.01       | -1.20      | -1.18        | 1.25       | 1.19         | 1.45       | 1.42         |
| AK2                  | adenylate kinase 2                            | chr1p34              | liver development                                                    | ---                                      | -1.04         | 1.03            | 1.15      | 1.04        | -1.03     | -1.06       | 1.02       | -1.81        | -1.50      | -1.77        | -1.91      | -1.91        |
| AK2                  | adenylate kinase 2                            | chr1p34              | liver development                                                    | ---                                      | -1.11         | -1.09           | -1.08     | -1.05       | 1.05      | 1.04        | 1.04       | 1.05         | 1.25       | 1.28         | 1.09       | 1.18         |
| AK2                  | adenylate kinase 2                            | chr1p34              | liver development                                                    | ---                                      | -1.09         | -1.09           | -1.04     | 1.05        | 1.04      | -1.15       | 1.29       | 1.15         | 1.67       | 1.34         | 1.32       | 1.32         |
| AK3                  | adenylate kinase 3                            | chr9p24.1            | nucleobase-containing compound metabolic process                     | ---                                      | 1.19          | 1.18            | 1.04      | 1.04        | 1.03      | 1.01        | -1.12      | -1.18        | -1.13      | 1.03         | -1.29      | -1.35        |
| AK3                  | adenylate kinase 3                            | chr9p24.1            | nucleobase-containing compound metabolic process                     | ---                                      | 1.20          | 1.00            | 1.12      | 1.03        | 1.02      | 1.21        | -1.24      | -1.14        | -1.23      | -1.06        | -1.54      | -1.61        |
| AK4 /// LOC100287542 | adenylate kinase 4 /// LOC100287542           | chr1p31.3            | liver development                                                    | ---                                      | -1.18         | -1.18           | 1.00      | -1.08       | -1.03     | -1.12       | 1.13       | -1.01        | -1.02      | 1.12         | 1.27       | 1.30         |
| AK5                  | adenylate kinase 5                            | chr1p31              | nucleobase-containing compound metabolic process                     | ---                                      | -1.67         | -1.24           | -1.16     | -1.00       | 1.67      | 1.35        | -1.72      | 1.03         | -1.53      | -3.20        | -1.95      | -1.59        |
| AK7                  | adenylate kinase 7                            | chr14q32.2           | inflammatory response to antigenic stimulus                          | ---                                      | -1.36         | -1.15           | 1.00      | 1.24        | -2.33     | -1.22       | -1.68      | -2.08        | 1.99       | 1.25         | 2.17       | 2.83         |

| ID           | Gene Title                   | Chromosomal Location | 1st Gene Ontology Biological Process       | Pathway                                   | A2497 30 mins | A2497P' 30 mins | A2497 2 h | A2497P' 2 h | A2497 4 h | A2497P' 4 h | A2497 24 h | A2497P' 24 h | A2497 48 h | A2497P' 48 h | A2497 72 h | A2497P' 72 h |
|--------------|------------------------------|----------------------|--------------------------------------------|-------------------------------------------|---------------|-----------------|-----------|-------------|-----------|-------------|------------|--------------|------------|--------------|------------|--------------|
| AK7          | adenylate kinase 7           | chr14q32.2           | inflammatory response to antigenic stim    | ---                                       | 1.16          | -1.01           | -1.21     | -1.21       | 1.32      | 1.10        | 1.01       | -1.02        | -3.31      | -2.63        | -3.07      | -1.94        |
| AK7          | adenylate kinase 7           | chr14q32.2           | inflammatory response to antigenic stim    | ---                                       | 1.12          | 1.01            | 1.05      | -1.01       | -1.10     | -1.07       | 1.12       | 1.11         | -1.85      | -1.20        | -1.97      | -1.24        |
| AK8          | adenylate kinase 8           | chr9q34.13           | nucleobase-containing compound metabo      | ---                                       | 3.02          | 5.29            | 1.13      | 2.06        | -1.41     | -3.01       | -1.56      | 2.47         | -4.04      | 1.22         | -1.01      | 1.19         |
| AK9          | adenylate kinase 9           | chr6q21              | nucleobase-containing compound metabo      | ---                                       | 1.08          | 1.11            | 1.30      | -1.31       | -1.13     | -1.21       | -1.47      | -1.18        | -3.50      | -2.48        | -2.99      | -3.13        |
| AKAP1        | A kinase (PRKA) anchor p     | chr17q22             | blood coagulation                          | G_Protein_Signaling // GenMAPP            | 1.03          | -1.05           | 1.01      | 1.06        | 1.03      | 1.05        | 1.03       | 1.02         | -1.11      | -1.05        | -1.07      | -1.14        |
| AKAP10       | A kinase (PRKA) anchor p     | chr17p11.1           | signal transduction                        | G_Protein_Signaling // GenMAPP            | -1.28         | 1.07            | 1.16      | 1.10        | 1.27      | 1.13        | 1.58       | 1.20         | 1.03       | 1.18         | 1.41       | 1.28         |
| AKAP10       | A kinase (PRKA) anchor p     | chr17p11.1           | signal transduction                        | G_Protein_Signaling // GenMAPP            | 1.01          | 1.15            | 1.04      | -1.16       | -1.00     | -1.12       | 1.08       | 1.15         | -1.02      | 1.43         | 1.29       | 1.21         |
| AKAP11       | A kinase (PRKA) anchor p     | chr13q14.11          | intracellular protein kinase cascade       | G_Protein_Signaling // GenMAPP            | 1.73          | 2.06            | 1.48      | 1.32        | 1.73      | 1.83        | 1.55       | 1.05         | -2.28      | -4.30        | -4.54      | -2.47        |
| AKAP12       | A kinase (PRKA) anchor p     | chr6q24-q25          | protein targeting                          | G_Protein_Signaling // GenMAPP            | 1.05          | 1.07            | -1.04     | 1.00        | -1.03     | 1.14        | -1.35      | -1.32        | 2.11       | 1.96         | 3.23       | 3.08         |
| AKAP12       | A kinase (PRKA) anchor p     | chr6q24-q25          | protein targeting                          | G_Protein_Signaling // GenMAPP            | 1.05          | 1.20            | -1.03     | 1.08        | -1.25     | -1.11       | -1.27      | -1.12        | 2.49       | 2.07         | 2.92       | 2.85         |
| AKAP12       | A kinase (PRKA) anchor p     | chr6q24-q25          | protein targeting                          | G_Protein_Signaling // GenMAPP            | 1.08          | 1.11            | 1.22      | 1.24        | 1.13      | 1.15        | 1.03       | 1.06         | 2.74       | 2.38         | 5.06       | 4.87         |
| AKAP12       | A kinase (PRKA) anchor p     | chr6q24-q25          | protein targeting                          | G_Protein_Signaling // GenMAPP            | 1.05          | -1.02           | 1.02      | 1.15        | -1.05     | 1.14        | -1.19      | -1.14        | 1.87       | 1.77         | 2.76       | 2.70         |
| AKAP13       | A kinase (PRKA) anchor p     | chr15q24-q25         | apoptotic process                          | ---                                       | -1.18         | -1.12           | 1.14      | -1.08       | 1.10      | -1.00       | -1.12      | -1.02        | -1.03      | -1.07        | 1.31       | 1.44         |
| AKAP17A      | A kinase (PRKA) anchor p     | chrXp22.33 and Yp    | regulation of transcription, DNA-depend    | Biogenic_Amine_Synthesis // GenMAPP       | 1.30          | 1.33            | 1.19      | 1.09        | 1.07      | 1.10        | 1.14       | 1.23         | 1.00       | 1.31         | 1.31       | -1.02        |
| AKAP2 /// P  | A kinase (PRKA) anchor p     | chr9q31.3            | regulation of cell shape                   | G_Protein_Signaling // GenMAPP            | 1.01          | -1.08           | 1.09      | 1.14        | -1.05     | 1.21        | -1.18      | -1.08        | 1.45       | 1.34         | 1.05       | -1.17        |
| AKAP2 /// P  | A kinase (PRKA) anchor p     | chr9q31.3            | regulation of cell shape                   | G_Protein_Signaling // GenMAPP            | 1.22          | 1.05            | 1.11      | 1.06        | 1.02      | 1.14        | -1.20      | 1.06         | 1.22       | 1.28         | 1.55       | 1.38         |
| AKAP5        | A kinase (PRKA) anchor p     | chr14q23.3           | energy reserve metabolic process           | G_Protein_Signaling // GenMAPP            | 1.29          | 1.42            | 1.13      | 1.03        | -2.00     | -1.71       | -1.94      | 1.06         | -1.38      | -2.05        | -2.32      | -4.31        |
| AKAP7        | A kinase (PRKA) anchor p     | chr6q23              | regulation of action potential             | G_Protein_Signaling // GenMAPP            | 1.12          | 1.21            | -1.09     | 1.01        | 1.01      | -1.00       | -1.12      | -1.14        | -1.84      | -1.72        | -1.76      | -2.12        |
| AKAP8        | A kinase (PRKA) anchor p     | chr19p13.1           | transport                                  | G_Protein_Signaling // GenMAPP            | -1.06         | -1.04           | 1.02      | 1.09        | 1.07      | 1.03        | 1.10       | 1.16         | 1.48       | 1.36         | 1.32       | 1.45         |
| AKAP8        | A kinase (PRKA) anchor p     | chr19p13.1           | transport                                  | G_Protein_Signaling // GenMAPP            | -1.20         | -1.25           | 1.03      | 1.11        | 1.02      | -1.06       | 1.17       | 1.42         | 1.32       | -1.02        | 1.72       | 1.61         |
| AKAP8L       | A kinase (PRKA) anchor p     | chr19p13.12          | phosphorylation                            | ---                                       | -1.05         | -1.23           | -1.00     | 1.08        | -1.08     | 1.08        | 1.30       | 1.20         | 1.09       | -1.19        | 1.40       | 1.60         |
| AKAP9        | A kinase (PRKA) anchor p     | chr7q21-q22          | G2                                         | G_Protein_Signaling // GenMAPP            | 1.10          | 1.15            | 1.07      | -1.00       | 1.05      | 1.02        | 1.03       | -1.08        | -1.54      | -1.43        | -1.32      | -1.27        |
| AKIP1        | A kinase (PRKA) interacti    | chr1p15.3            | substrate adhesion-dependent cell spread   | ---                                       | -1.00         | -1.02           | -1.07     | -1.11       | -1.10     | -1.03       | -1.05      | -1.07        | 1.15       | 1.24         | -1.08      | 1.02         |
| AKIP1 /// NU | A kinase (PRKA) interacti    | chr1p15.3 /// chr1q  | protein phosphorylation                    | ---                                       | 1.17          | 1.17            | -1.03     | 1.14        | 1.20      | 1.05        | 1.12       | 1.15         | 2.13       | 1.41         | 2.98       | 2.23         |
| AKIRIN1      | akirin 1                     | chr1p34.3            | 0                                          | ---                                       | 1.22          | 1.04            | 1.20      | 1.08        | 1.08      | -1.03       | -1.05      | -1.12        | -1.08      | 1.03         | 1.34       | 1.03         |
| AKIRIN1      | akirin 1                     | chr1p34.3            | 0                                          | ---                                       | -1.18         | -1.21           | 1.00      | -1.09       | 1.06      | -1.06       | 1.11       | 1.05         | 1.01       | 1.04         | 1.27       | 1.07         |
| AKIRIN2-AS   | NULL /// AKIRIN2 antisen     | ---                  | 0                                          | ---                                       | 1.38          | 1.30            | 1.04      | -1.02       | 1.12      | 1.06        | -1.02      | -1.00        | -1.14      | -1.27        | 1.40       | 1.16         |
| AKNA         | AT-hook transcription fact   | chr9q32              | transcription, DNA-dependent               | ---                                       | 1.08          | 1.11            | 1.01      | 1.45        | -1.02     | -1.23       | 1.86       | 1.85         | 1.73       | 1.58         | 1.62       | 1.86         |
| AKNAD1       | AKNA domain containing       | chr1p13.3            | 0                                          | ---                                       | 3.47          | 2.12            | 1.33      | -1.23       | 1.50      | 1.88        | 1.52       | 1.23         | -5.14      | -10.15       | -2.33      | -1.46        |
| AKR1A1       | aldo-keto reductase family   | chr1p33-p32          | glucose metabolic process                  | ---                                       | -1.13         | -1.10           | -1.03     | 1.02        | 1.08      | -1.05       | -1.00      | 1.23         | 1.20       | 1.20         | 1.24       | 1.37         |
| AKR1C1       | aldo-keto reductase family   | chr10p15-p14         | retinoid metabolic process                 | ---                                       | -1.08         | 1.03            | -1.05     | -1.03       | 1.04      | -1.04       | 1.11       | 1.02         | 1.22       | 1.06         | 1.20       | 1.19         |
| AKR1C1       | aldo-keto reductase family   | chr10p15-p14         | retinoid metabolic process                 | ---                                       | 1.21          | 1.15            | 1.02      | -1.32       | 1.10      | 1.21        | -1.13      | -1.01        | -1.79      | 1.12         | 1.09       | 1.15         |
| AKR1C1       | aldo-keto reductase family   | chr10p15-p14         | retinoid metabolic process                 | ---                                       | -1.09         | 1.02            | -1.04     | -1.01       | 1.04      | -1.08       | 1.15       | 1.06         | 1.37       | 1.09         | 1.25       | 1.24         |
| AKR1C1 /// A | aldo-keto reductase family   | chr10p15-p14         | retinoid metabolic process                 | ---                                       | 1.17          | 1.19            | 1.05      | 1.02        | -1.03     | 1.22        | -1.51      | -1.24        | -1.27      | -1.13        | 1.15       | -1.02        |
| AKR1C2 /// L | aldo-keto reductase family   | chr10p15-p14         | lipid metabolic process                    | ---                                       | -1.05         | 1.01            | -1.07     | -1.03       | 1.03      | -1.06       | 1.13       | 1.03         | 1.32       | 1.10         | 1.22       | 1.20         |
| AKR1C2 /// L | aldo-keto reductase family   | chr10p15-p14         | lipid metabolic process                    | ---                                       | -1.05         | 1.04            | -1.04     | 1.01        | 1.04      | -1.05       | 1.09       | 1.01         | 1.20       | 1.11         | 1.29       | 1.27         |
| AKR1C3       | aldo-keto reductase family   | chr10p15-p14         | protein import into nucleus, translocation | ---                                       | -1.08         | -1.05           | -1.06     | -1.06       | 1.07      | -1.01       | 1.02       | -1.02        | 1.36       | 1.18         | 1.23       | 1.30         |
| AKR7A3       | aldo-keto reductase family   | chr1p36.13           | cellular aldehyde metabolic process        | ---                                       | -1.04         | -1.23           | -1.03     | -1.17       | -1.02     | 1.00        | -1.12      | -1.24        | -1.37      | 1.05         | -1.31      | -1.11        |
| AKT2         | v-akt murine thymoma vir     | chr19q13.1-q13.2     | positive regulation of protein phosphoryl  | ---                                       | -1.47         | -1.35           | -1.36     | -1.37       | -1.04     | -1.18       | -1.04      | 1.12         | 1.68       | 1.41         | 1.31       | 1.72         |
| AKT2         | v-akt murine thymoma vir     | chr19q13.1-q13.2     | positive regulation of protein phosphoryl  | ---                                       | -1.12         | -1.17           | -1.04     | 1.01        | -1.03     | -1.05       | 1.14       | 1.06         | 1.57       | 1.33         | 1.12       | 1.34         |
| AKT3         | v-akt murine thymoma vir     | chr1q44              | mitochondrial genome maintenance           | Integrin-mediated_cell_adhesion_KEGG // C | 1.03          | -1.01           | 1.06      | 1.24        | 1.06      | 1.03        | 1.05       | 1.10         | -1.36      | -1.43        | -1.64      | -1.37        |
| AL132709.8   | NULL /// NULL                | ---                  | 0                                          | ---                                       | -1.56         | -1.17           | 2.26      | 4.73        | 1.76      | 2.85        | 1.25       | -1.02        | -1.28      | -1.32        | 1.22       | -1.80        |
| AL773604.8   | NULL /// NULL                | ---                  | 0                                          | ---                                       | -1.45         | 1.34            | 1.27      | 1.49        | 1.00      | 1.03        | 1.12       | 1.24         | -1.49      | -2.66        | -3.21      | -2.09        |
| AL928742.12  | NULL /// NULL                | ---                  | 0                                          | ---                                       | 1.18          | 1.51            | -1.01     | -1.69       | 1.47      | 1.33        | -1.04      | 1.01         | 1.31       | 1.63         | -1.61      | -1.52        |
| ALAD         | aminolevulinate dehydrat     | chr9q33.1            | porphyrin-containing compound metabo       | Heme_Biosynthesis // GenMAPP              | 1.07          | 1.10            | -1.02     | 1.03        | -1.14     | 1.02        | -1.08      | -1.04        | -1.14      | -1.01        | -1.54      | -1.27        |
| ALAS1        | aminolevulinate, delta-, syn | chr3p21.1            | porphyrin-containing compound metabo       | Heme_Biosynthesis // GenMAPP              | 1.04          | 1.03            | 1.04      | 1.04        | -1.03     | -1.02       | -1.06      | -1.02        | 1.20       | 1.19         | 1.54       | 1.48         |
| ALB          | albumin                      | chr4q13.3            | platelet degranulation                     | ---                                       | 1.45          | 1.05            | -1.74     | -1.37       | 2.11      | 1.17        | -1.66      | -1.22        | 1.15       | 12.38        | 2.85       | 1.75         |
| ALCAM        | activated leukocyte cell adh | chr3q13.1            | cell adhesion                              | ---                                       | 1.51          | 1.60            | 1.00      | 1.09        | -1.32     | -1.13       | -1.29      | 1.48         | 2.28       | 1.87         | 1.43       | 1.06         |
| ALCAM        | activated leukocyte cell adh | chr3q13.1            | cell adhesion                              | ---                                       | -1.09         | -1.07           | 1.05      | 1.01        | -1.01     | 1.01        | -1.20      | -1.09        | -1.55      | -1.10        | -1.02      | -1.02        |
| ALDH16A1     | aldehyde dehydrogenase 16    | chr19q13.33          | metabolic process                          | ---                                       | 1.04          | -1.14           | -1.11     | 1.23        | 1.01      | -1.13       | 1.03       | 1.24         | 1.14       | 1.08         | -1.37      | -1.31        |
| ALDH18A1     | aldehyde dehydrogenase 18    | chr10q24.3           | glutamate metabolic process                | ---                                       | 1.10          | 1.14            | 1.05      | -1.03       | -1.03     | -1.05       | -1.04      | -1.30        | 1.00       | 1.12         | 1.11       | 1.17         |
| ALDH1A1      | aldehyde dehydrogenase 1     | chr9q21.13           | ethanol oxidation                          | ---                                       | 3.72          | -1.37           | 2.91      | -2.92       | -8.28     | -5.09       | 1.15       | 6.09         | -1.01      | 1.53         | 5.33       | 5.70         |
| ALDH1A2      | aldehyde dehydrogenase 1     | chr15q21.3           | blood vessel development                   | ---                                       | -1.39         | 1.04            | 1.08      | 1.24        | 1.00      | -4.94       | 1.40       | 1.16         | -1.01      | 1.43         | -1.15      | 1.11         |
| ALDH1A3      | aldehyde dehydrogenase 1     | chr15q26.3           | kidney development                         | ---                                       | -1.00         | -1.03           | -1.08     | -1.04       | -1.03     | 1.03        | -1.43      | -1.20        | -1.72      | -1.72        | -1.37      | -1.61        |
| ALDH1B1      | aldehyde dehydrogenase 1     | chr9p11.1            | carbohydrate metabolic process             | ---                                       | -1.19         | -1.15           | -1.07     | 1.12        | 1.02      | -1.09       | 1.19       | 1.46         | 1.63       | 1.48         | 2.02       | 2.53         |
| ALDH1L2      | aldehyde dehydrogenase 1     | chr12q23.3           | one-carbon metabolic process               | ---                                       | -1.09         | 1.09            | -1.19     | -1.31       | 1.04      | 1.12        | 1.03       | -1.01        | -1.48      | -1.25        | -1.69      | -1.93        |
| ALDH2        | aldehyde dehydrogenase 2     | chr12q24.2           | carbohydrate metabolic process             | ---                                       | -1.03         | 1.02            | -1.00     | 1.02        | 1.03      | -1.03       | 1.12       | 1.11         | 1.07       | 1.11         | -1.24      | -1.06        |
| ALDH3A2      | aldehyde dehydrogenase 3     | chr17p11.2           | cellular aldehyde metabolic process        | ---                                       | -1.13         | -1.11           | 1.04      | -1.09       | 1.20      | 1.14        | -1.04      | -1.11        | -1.93      | -1.42        | -1.30      | -1.44        |
| ALDH3A2      | aldehyde dehydrogenase 3     | chr17p11.2           | cellular aldehyde metabolic process        | ---                                       | 1.07          | -1.01           | -1.03     | 1.09        | -1.08     | 1.06        | -1.30      | -1.17        | -1.49      | -1.23        | -1.54      | -1.44        |
| ALDH3A2      | aldehyde dehydrogenase 3     | chr17p11.2           | cellular aldehyde metabolic process        | ---                                       | -1.10         | -1.03           | -1.06     | -1.08       | -1.01     | -1.02       | -1.03      | 1.03         | -1.45      | -1.15        | -1.49      | -1.37        |
| ALDH3B1      | aldehyde dehydrogenase 3     | chr11q13             | alcohol metabolic process                  | ---                                       | -1.02         | -1.15           | 1.07      | 1.22        | -1.00     | 1.02        | 1.30       | 1.07         | -1.34      | -1.35        | -1.95      | -1.48        |
| ALDH3B1      | aldehyde dehydrogenase 3     | chr11q13             | alcohol metabolic process                  | ---                                       | -1.08         | -1.13           | -1.02     | 1.05        | 1.02      | -1.01       | 1.08       | 1.12         | -1.37      | -1.19        | -1.78      | -1.41        |
| ALDH4A1      | aldehyde dehydrogenase 4     | chr1p36              | proline metabolic process                  | ---                                       | -1.38         | -1.58           | 1.16      | 1.42        | 1.03      | 1.25        | 1.03       | -1.04        | -1.14      | 1.26         | -1.58      | -1.66        |
| ALDH5A1      | aldehyde dehydrogenase 5     | chr6p22              | glucose metabolic process                  | ---                                       | 1.30          | 1.27            | 1.20      | 1.13        | 1.05      | 1.11        | -1.02      | -1.01        | -3.61      | -2.69        | -3.30      | ---          |
| ALDH5A1      | aldehyde dehydrogenase 5     | chr6p22              | glucose metabolic process                  | ---                                       | 1.03          | -1.29           | -1.14     | -1.12       | -1.17     | -1.69       | 1.18       | 1.39         | -1.45      | -1.30        | -1.23      | -1.11        |
| ALDH6A1      | aldehyde dehydrogenase 6     | chr14q24.3           | thymine catabolic process                  | ---                                       | -1.03         | -1.19           | 1.09      | -1.16       | -1.15     | -1.10       | 1.07       | -1.15        | -2.11      | -1.62        | -1.81      | -2.58        |







| ID            | Gene Title                            | Chromosomal Location | 1st Gene Ontology Biological Process                    | Pathway                                 | A2497 30 mins | A2497P' 30 mins | A2497 2 h | A2497P' 2 h | A2497 4 h | A2497P' 4 h | A2497 24 h | A2497P' 24 h | A2497 48 h | A2497P' 48 h | A2497 72 h | A2497P' 72 h |
|---------------|---------------------------------------|----------------------|---------------------------------------------------------|-----------------------------------------|---------------|-----------------|-----------|-------------|-----------|-------------|------------|--------------|------------|--------------|------------|--------------|
| AOC3          | amine oxidase, copper cont            | chr17q21             | inflammatory response                                   | ---                                     | 1.65          | 1.27            | 1.33      | 1.51        | 1.20      | -1.01       | 1.38       | -1.15        | 2.28       | 3.10         | 3.38       | 4.96         |
| AOX1          | aldehyde oxidase 1                    | chr2q33              | vitamin metabolic process                               | ---                                     | 1.07          | 1.05            | -1.02     | 1.01        | -1.02     | 1.09        | 1.02       | -1.20        | -1.52      | -1.09        | -1.93      | -1.69        |
| AOX1          | aldehyde oxidase 1                    | chr2q33              | vitamin metabolic process                               | ---                                     | 1.07          | 1.09            | 1.03      | -1.15       | 1.09      | -1.03       | 1.15       | -1.08        | -1.15      | -1.05        | -1.42      | -1.34        |
| AP000469.2    | NULL /// NULL                         | ---                  | 0                                                       | ---                                     | 2.51          | 1.50            | 4.15      | 1.65        | -2.39     | -4.64       | 3.18       | 1.23         | 5.66       | 2.94         | -2.58      | -8.70        |
| AP000475.2    | NULL /// NULL                         | ---                  | 0                                                       | ---                                     | 2.01          | 1.28            | -2.22     | -5.22       | 4.64      | -1.22       | 1.80       | -1.51        | 3.89       | -1.01        | -2.27      | -1.19        |
| AP000696.2    | NULL /// NULL                         | ---                  | 0                                                       | ---                                     | -1.78         | -1.04           | 1.22      | 2.19        | 3.12      | 2.34        | 1.29       | -1.30        | -2.93      | -2.67        | 1.07       | -1.46        |
| AP001062.7    | NULL /// NULL                         | ---                  | 0                                                       | ---                                     | 1.43          | 1.31            | 1.12      | 1.23        | -1.10     | -1.26       | -1.30      | 1.04         | -2.33      | -2.57        | 1.17       | 1.33         |
| AP001062.7    | NULL /// NULL                         | ---                  | 0                                                       | ---                                     | -1.61         | -1.21           | -1.81     | -2.30       | -1.05     | -1.80       | -2.53      | 1.80         | -2.39      | -1.33        | -1.35      | -1.35        |
| AP001062.7    | NULL /// NULL                         | ---                  | 0                                                       | ---                                     | -1.45         | -1.45           | 1.69      | 1.20        | 1.01      | 1.23        | 1.46       | 2.51         | 1.50       | -1.24        | -1.43      | 1.48         |
| AP001258.4    | NULL /// NULL                         | ---                  | 0                                                       | ---                                     | 1.03          | 1.27            | 1.09      | 1.24        | 1.02      | 1.12        | 1.42       | 1.57         | -1.87      | -1.99        | -1.16      | -1.30        |
| AP001630.5    | NULL /// NULL                         | ---                  | 0                                                       | ---                                     | 1.16          | 1.39            | 1.36      | 1.16        | -1.17     | -1.12       | 1.22       | 1.33         | 1.30       | 1.21         | 1.02       | 1.12         |
| AP006216.10   | NULL /// NULL                         | ---                  | 0                                                       | ---                                     | -1.35         | -1.45           | 1.06      | -1.19       | 1.17      | -1.02       | -1.12      | -1.00        | 1.07       | 1.14         | -2.15      | -1.93        |
| APIG1         | adaptor-related protein com           | chr16q23             | transport                                               | ---                                     | -1.00         | -1.08           | 1.07      | 1.11        | 1.07      | 1.05        | -1.02      | -1.05        | 1.23       | 1.22         | 1.45       | 1.50         |
| APIG2         | adaptor-related protein com           | chr14q11.2           | transport                                               | ---                                     | 1.13          | -1.02           | -1.01     | 1.15        | -1.04     | -1.11       | 1.24       | 1.25         | -1.26      | -1.64        | -3.59      | -2.44        |
| APIM1         | adaptor-related protein com           | chr19p13.12          | transport                                               | ---                                     | -1.13         | -1.19           | -1.00     | -1.06       | 1.11      | -1.05       | 1.04       | 1.26         | 1.13       | 1.02         | -1.05      | 1.27         |
| APIS1         | adaptor-related protein com           | chr7q22.1            | transport                                               | ---                                     | -1.13         | -1.27           | -1.17     | -1.25       | -1.02     | 1.04        | -1.20      | 1.12         | 1.11       | 1.33         | 1.01       | 1.19         |
| APIS2         | adaptor-related protein com           | chrXp22.2            | transport                                               | ---                                     | 1.13          | -1.34           | -1.04     | -1.03       | 1.18      | 1.71        | -1.33      | -1.34        | -2.20      | -1.79        | -2.26      | -2.11        |
| APIS2         | adaptor-related protein com           | chrXp22.2            | transport                                               | ---                                     | 1.02          | 1.07            | -1.02     | -1.06       | -1.01     | 1.11        | -1.08      | 1.02         | -1.68      | -1.54        | -1.88      | -2.13        |
| APIS2         | adaptor-related protein com           | chrXp22.2            | transport                                               | ---                                     | 1.08          | 1.09            | -1.04     | 1.01        | -1.07     | 1.03        | 1.03       | -1.07        | 1.05       | 1.12         | -1.16      | -1.13        |
| APIS3         | adaptor-related protein com           | chr2q36.1            | transport                                               | ---                                     | -1.37         | -1.00           | 1.36      | 1.17        | -1.38     | -1.26       | -1.12      | 1.50         | 1.39       | 1.16         | 2.54       | 1.40         |
| APIS3         | adaptor-related protein com           | chr2q36.1            | transport                                               | ---                                     | -1.01         | 1.37            | 1.01      | 1.06        | 1.19      | 1.64        | 1.28       | 1.25         | 2.62       | 2.60         | 2.83       | 1.78         |
| APIS3         | adaptor-related protein com           | chr2q36.1            | transport                                               | ---                                     | 1.45          | 1.53            | -1.04     | 1.17        | 1.30      | 1.06        | -1.08      | 1.15         | 2.25       | 2.28         | 1.46       | 1.18         |
| APIS3         | adaptor-related protein com           | chr2q36.1            | transport                                               | ---                                     | -1.04         | 1.15            | 1.16      | 1.22        | -1.27     | -1.04       | 1.12       | -1.37        | 1.02       | -1.74        | -1.74      | -1.78        |
| AP2A2         | adaptor-related protein com           | chr11p15.5           | transport                                               | ---                                     | 1.70          | 1.59            | 1.11      | 1.62        | 1.22      | -1.10       | 1.41       | 1.12         | 1.49       | 1.16         | -1.42      | -1.11        |
| AP2B1         | adaptor-related protein com           | chr17q11.2-q12       | transport                                               | ---                                     | -1.12         | -1.08           | -1.03     | 1.00        | 1.04      | 1.02        | 1.06       | -1.03        | -1.00      | 1.05         | -1.48      | -1.20        |
| AP2B1         | adaptor-related protein com           | chr17q11.2-q12       | transport                                               | ---                                     | -1.01         | -1.02           | 1.10      | -1.02       | -1.05     | -1.06       | 1.04       | 1.01         | -1.21      | -1.05        | -1.33      | -1.35        |
| AP3B1         | adaptor-related protein com           | chr5q14.1            | protein targeting to lysosome                           | ---                                     | 1.13          | 1.18            | 1.10      | -1.04       | -1.07     | -1.04       | -1.17      | -1.14        | -1.49      | -1.25        | -1.63      | -1.65        |
| AP3M1         | adaptor-related protein com           | chr10q22.2           | protein targeting to lysosome                           | ---                                     | 1.02          | 1.09            | -1.04     | -1.01       | -1.07     | 1.02        | -1.22      | -1.08        | -1.34      | -1.15        | -1.21      | -1.31        |
| AP3S1         | adaptor-related protein com           | chr5q22              | transport                                               | ---                                     | 1.06          | 1.05            | 1.00      | -1.05       | -1.08     | 1.05        | 1.06       | -1.10        | 1.16       | 1.25         | 1.19       | 1.07         |
| AP3S2 /// C15 | adaptor-related protein com           | chr15q /// chr15q26  | transport                                               | ---                                     | 1.04          | 1.05            | -1.11     | 1.01        | -1.03     | -1.04       | 1.08       | -1.04        | 1.28       | 1.19         | 1.17       | 1.13         |
| AP3S2 /// C15 | adaptor-related protein com           | chr15q /// chr15q26  | transport                                               | ---                                     | 1.19          | 1.16            | 1.01      | 1.39        | -1.07     | 1.03        | 1.04       | 1.24         | 1.48       | 1.37         | 1.39       | 1.67         |
| AP3S2 /// C15 | adaptor-related protein com           | chr15q /// chr15q26  | transport                                               | ---                                     | 1.27          | 1.21            | 1.10      | 1.01        | 1.01      | -1.15       | -1.18      | -1.11        | 1.16       | 1.16         | 1.38       | 1.48         |
| AP4E1         | adaptor-related protein com           | chr15q21.2           | transport                                               | ---                                     | -1.02         | -1.73           | -1.05     | -1.92       | -2.00     | 1.39        | 6.99       | 5.84         | -1.06      | -1.77        | 1.15       | -3.17        |
| AP4E1         | adaptor-related protein com           | chr15q21.2           | transport                                               | ---                                     | 1.21          | 1.17            | 1.00      | -1.04       | -1.12     | -1.09       | -1.14      | -1.18        | -1.60      | -1.45        | -1.14      | -1.51        |
| AP4E1         | adaptor-related protein com           | chr15q21.2           | transport                                               | ---                                     | 1.17          | 1.42            | -1.46     | -1.28       | 1.89      | 2.04        | -1.01      | -1.18        | 1.23       | 1.13         | 6.94       | 6.51         |
| AP4S1         | adaptor-related protein com           | chr14q12             | transport                                               | ---                                     | 1.05          | 1.01            | -1.02     | -1.04       | 1.12      | -1.23       | 1.16       | 1.18         | -1.56      | -1.37        | -3.40      | -2.48        |
| AP4S1         | adaptor-related protein com           | chr14q12             | transport                                               | ---                                     | -1.17         | -1.02           | -1.02     | -1.12       | -1.09     | -1.01       | 1.27       | -1.06        | -2.23      | -2.40        | -1.77      | -2.11        |
| AP4S1         | adaptor-related protein com           | chr14q12             | transport                                               | ---                                     | -1.31         | -1.18           | 1.17      | 1.39        | -1.00     | 1.00        | 1.25       | 1.32         | -1.82      | -2.44        | -3.65      | -2.76        |
| AP5M1         | adaptor-related protein com           | chr14q22.3           | transport                                               | ---                                     | -1.15         | -1.11           | 1.04      | 1.15        | 1.15      | -1.08       | -1.19      | -1.27        | -1.45      | -1.30        | -2.24      | -1.76        |
| AP5M1         | adaptor-related protein com           | chr14q22.3           | transport                                               | ---                                     | -1.03         | -1.01           | 1.05      | -1.01       | 1.11      | 1.02        | -1.04      | -1.13        | -1.25      | -1.35        | -1.27      | -1.27        |
| AP5M1         | adaptor-related protein com           | chr14q22.3           | transport                                               | ---                                     | 1.06          | 1.00            | 1.06      | -1.02       | -1.01     | 1.10        | -1.35      | -1.22        | -1.77      | -1.63        | -1.30      | -1.65        |
| AP5Z1 /// MI  | adaptor-related protein com           | chr7q22.2            | double-strand break repair via homologous recombination | ---                                     | 1.14          | 1.10            | -1.01     | 1.21        | -1.12     | -1.11       | 1.57       | 1.42         | -1.45      | -1.62        | -1.21      | -1.08        |
| APAF1         | apoptotic peptidase activator         | chr12q23             | neural tube closure                                     | Apoptosis // GenMAPP /// Apoptosis_GenM | -1.08         | -1.98           | 1.71      | 1.03        | -1.21     | -1.26       | -1.18      | 1.75         | 1.75       | 1.42         | -1.28      | 1.28         |
| APBA3         | amyloid beta (A4) precursor           | chr19p13.3           | in utero embryonic development                          | ---                                     | 1.05          | 1.03            | -1.09     | 1.12        | 1.11      | 1.04        | 1.26       | 1.38         | 1.65       | 1.46         | 1.01       | 1.34         |
| APBB1         | amyloid beta (A4) precursor           | chr11p15             | neuron migration                                        | ---                                     | -1.36         | 1.17            | 2.18      | 1.78        | 1.25      | 1.04        | -1.98      | 1.34         | -1.35      | -1.93        | -2.25      | -2.94        |
| APBB1IP       | amyloid beta (A4) precursor           | chr10p12.1           | signal transduction                                     | ---                                     | -1.09         | -1.06           | -1.05     | 1.03        | 1.01      | -1.09       | 1.08       | 1.06         | -1.50      | -1.53        | -1.78      | -1.42        |
| APBB2         | amyloid beta (A4) precursor           | chr4p13              | neuron migration                                        | ---                                     | -1.02         | -1.18           | -1.03     | 1.08        | 1.18      | 1.01        | 1.12       | 1.03         | 1.05       | -1.05        | 1.44       | 1.18         |
| APBB2         | amyloid beta (A4) precursor           | chr4p13              | neuron migration                                        | ---                                     | -1.24         | -1.23           | 1.00      | -1.07       | 1.06      | 1.00        | 1.01       | 1.11         | -1.03      | -1.06        | 1.27       | 1.10         |
| APBB2         | amyloid beta (A4) precursor           | chr4p13              | neuron migration                                        | ---                                     | -1.18         | 3.60            | -5.01     | -1.57       | -1.02     | -1.38       | -1.69      | 1.84         | 4.18       | 2.63         | -3.24      | -1.38        |
| APBB3         | amyloid beta (A4) precursor           | chr5q31              | intracellular signal transduction                       | ---                                     | -1.34         | -1.97           | 1.60      | 1.32        | -1.13     | -1.10       | 1.58       | 1.57         | -1.19      | -1.48        | -1.46      | -1.29        |
| APC           | adenomatous polyposis coli            | chr5q21-q22          | mitotic cytokinesis                                     | Wnt_signaling // GenMAPP                | -1.00         | -1.16           | 1.28      | 1.01        | -1.03     | 1.01        | -1.15      | -1.17        | -2.45      | -1.50        | -1.86      | -1.92        |
| APC           | adenomatous polyposis coli            | chr5q21-q22          | mitotic cytokinesis                                     | Wnt_signaling // GenMAPP                | 1.33          | 1.24            | 1.10      | 1.06        | -1.12     | 1.09        | -1.41      | -1.09        | -1.75      | -1.38        | -1.33      | -1.58        |
| APC           | adenomatous polyposis coli            | chr5q21-q22          | mitotic cytokinesis                                     | Wnt_signaling // GenMAPP                | 1.09          | -1.01           | 1.17      | -1.11       | 1.10      | 1.04        | 1.04       | 1.06         | -1.79      | -1.44        | -1.37      | -1.56        |
| APEH          | acylaminoacyl-peptide hydrolase       | chr3q21.31           | proteolysis                                             | ---                                     | -1.05         | -1.04           | -1.03     | 1.10        | 1.04      | -1.02       | 1.37       | 1.20         | 1.47       | 1.27         | -1.04      | 1.09         |
| APEX1         | APEX nuclease (multifunctional)       | chr14q11.2           | DNA repair                                              | ---                                     | 1.03          | 1.04            | -1.01     | -1.06       | 1.01      | 1.07        | -1.00      | -1.03        | -1.42      | -1.24        | -1.48      | -1.50        |
| APEX2         | APEX nuclease (apurinic/apyrimidinic) | chrXp11.21           | DNA repair                                              | ---                                     | -1.04         | -1.12           | 1.02      | 1.11        | -1.04     | -1.08       | -1.04      | 1.06         | 1.20       | 1.34         | 1.44       | 1.47         |
| APEX2         | APEX nuclease (apurinic/apyrimidinic) | chrXp11.21           | DNA repair                                              | ---                                     | -1.04         | -1.03           | 1.05      | -1.06       | 1.03      | -1.05       | 1.15       | 1.02         | 1.32       | 1.21         | 1.10       | 1.06         |
| APH1B         | APH1B gamma secretase                 | chr15q22.2           | apoptotic process                                       | ---                                     | 1.06          | 1.16            | 1.30      | 1.51        | -1.16     | 1.00        | -1.06      | -1.78        | -3.49      | -1.99        | -2.04      | -2.53        |
| APH1B         | APH1B gamma secretase                 | chr15q22.2           | apoptotic process                                       | ---                                     | 1.04          | 1.04            | -1.24     | -1.30       | 1.14      | -1.04       | -1.07      | 1.12         | -1.15      | -1.33        | -1.04      | -1.65        |
| API5          | apoptosis inhibitor 5                 | chr11p11.2           | apoptotic process                                       | ---                                     | 1.10          | 1.03            | 1.16      | 1.13        | 1.07      | 1.23        | -1.05      | -1.37        | -1.14      | 1.28         | -1.12      | -1.39        |
| API5          | apoptosis inhibitor 5                 | chr11p11.2           | apoptotic process                                       | ---                                     | 1.00          | -1.02           | 1.20      | -1.05       | 1.07      | 1.13        | -1.58      | -1.35        | -3.13      | -2.06        | -4.76      | -3.31        |
| API5          | apoptosis inhibitor 5                 | chr11p11.2           | apoptotic process                                       | ---                                     | -1.06         | -1.04           | -1.09     | -1.02       | -1.05     | -1.08       | 1.00       | -1.05        | -1.06      | -1.06        | -1.05      | -1.13        |
| APITD1 /// A  | apoptosis-inducing, TAF9-1            | chr1p /// chr1p36.22 | M phase of mitotic cell cycle                           | ---                                     | -1.08         | -1.05           | 1.04      | 1.05        | 1.07      | -1.08       | -1.08      | 1.01         | -1.47      | -1.59        | -1.62      | -1.50        |
| APLN          | apelin                                | chrXq25              | regulation of the force of heart contraction            | ---                                     | 2.31          | 3.85            | 1.17      | 1.24        | 1.67      | 1.67        | 1.22       | 1.65         | 1.51       | 1.37         | 1.41       | 3.06         |
| APLNR         | apelin receptor                       | chr11q12             | signal transduction                                     | GPCRDB_Class_A_Rhodopsin-like // GenM   | 1.55          | -1.81           | 1.10      | -1.45       | -4.71     | -4.66       | -4.74      | -1.60        | 5.44       | 10.46        | 1.11       | -1.39        |
| APLP2         | amyloid beta (A4) precursor           | chr11q24             | suckling behavior                                       | ---                                     | 1.00          | -1.06           | -1.02     | 1.10        | 1.08      | -1.08       | -1.13      | 1.11         | 1.10       | 1.01         | 1.03       | 1.07         |





































| ID       | Gene Title                               | Chromosomal Location | 1st Gene Ontology Biological Process    | Pathway                                    | A2497 30 mins | A2497P' 30 mins | A2497 2 h | A2497P' 2 h | A2497 4 h | A2497P' 4 h | A2497 24 h | A2497P' 24 h | A2497 48 h | A2497P' 48 h | A2497 72 h | A2497P' 72 h |
|----------|------------------------------------------|----------------------|-----------------------------------------|--------------------------------------------|---------------|-----------------|-----------|-------------|-----------|-------------|------------|--------------|------------|--------------|------------|--------------|
| C9orf156 | chromosome 9 open reading frame          | chr9q22.33           | virus-host interaction                  | ---                                        | -1.04         | 1.00            | -1.01     | -1.07       | 1.03      | -1.06       | 1.03       | -1.06        | -1.54      | -1.35        | -1.02      | -1.02        |
| C9orf156 | chromosome 9 open reading frame          | chr9q22.33           | virus-host interaction                  | ---                                        | 1.25          | -1.03           | -1.07     | 1.04        | 1.09      | 1.29        | -1.18      | -1.15        | -1.73      | -1.64        | 1.01       | -1.06        |
| C9orf16  | chromosome 9 open reading frame          | chr9q34.1            | 0                                       | ---                                        | 1.15          | 1.01            | -1.03     | 1.03        | 1.00      | -1.15       | 1.20       | 1.09         | 1.38       | 1.18         | 1.05       | 1.04         |
| C9orf169 | chromosome 9 open reading frame          | chr9q34.3            | 0                                       | ---                                        | -1.03         | 1.02            | -1.04     | -1.03       | 1.04      | -1.10       | -1.01      | -1.05        | -1.17      | -1.61        | -1.29      | -1.50        |
| C9orf3   | chromosome 9 open reading frame          | chr9q22.32           | proteolysis                             | ---                                        | 1.18          | 1.04            | 1.02      | 1.03        | -1.04     | 1.04        | -1.19      | -1.14        | -2.44      | -2.31        | -2.59      | -2.57        |
| C9orf3   | chromosome 9 open reading frame          | chr9q22.32           | proteolysis                             | ---                                        | -1.09         | -1.03           | -1.07     | 1.03        | -1.00     | -1.04       | -1.09      | 1.02         | -1.46      | -1.86        | -1.01      | 1.02         |
| C9orf38  | chromosome 9 open reading frame          | chr9p24.1            | 0                                       | ---                                        | 1.51          | 1.16            | -1.29     | 1.06        | -1.03     | 1.26        | 1.40       | 1.05         | -9.31      | -2.96        | -3.49      | -2.08        |
| C9orf40  | chromosome 9 open reading frame          | chr9q21.13           | 0                                       | ---                                        | 1.18          | 1.11            | -1.04     | 1.03        | -1.04     | 1.07        | -1.15      | 1.00         | -1.15      | -1.11        | 1.21       | 1.11         |
| C9orf40  | chromosome 9 open reading frame          | chr9q21.13           | 0                                       | ---                                        | 1.03          | -1.02           | -1.27     | -1.40       | -1.01     | 1.02        | -1.82      | -1.24        | -1.30      | -1.13        | 1.20       | 1.10         |
| C9orf41  | chromosome 9 open reading frame          | chr9q21.13           | 0                                       | ---                                        | 1.06          | 1.01            | -1.04     | 1.05        | -1.16     | 1.01        | -1.36      | -1.05        | -1.28      | -1.13        | -1.10      | -1.10        |
| C9orf43  | chromosome 9 open reading frame          | chr9q32              | 0                                       | ---                                        | -1.23         | -1.14           | 1.24      | 1.03        | 1.37      | 1.33        | 1.35       | 1.26         | -2.55      | -2.45        | -1.53      | -2.22        |
| C9orf47  | chromosome 9 open reading frame          | chr9q22.1            | 0                                       | S1P_Signaling // GenMAPP // Small_ligand   | -1.10         | -1.17           | 1.20      | 1.27        | -1.54     | 1.09        | 1.37       | 1.06         | -1.37      | -1.41        | -2.10      | -1.74        |
| C9orf47  | chromosome 9 open reading frame          | chr9q22.1            | 0                                       | S1P_Signaling // GenMAPP // Small_ligand   | -1.20         | 1.00            | 1.34      | 1.15        | -1.42     | -1.12       | -1.11      | -1.31        | -2.92      | -1.85        | -1.09      | -1.14        |
| C9orf69  | chromosome 9 open reading frame          | chr9q34.3            | cell cycle                              | ---                                        | -1.22         | -1.26           | -1.01     | -1.11       | 1.06      | 1.00        | -1.14      | -1.13        | -1.39      | -1.28        | -1.48      | -1.17        |
| C9orf72  | chromosome 9 open reading frame          | chr9p21.2            | cell death                              | ---                                        | 1.25          | -1.08           | 1.24      | 1.67        | 1.66      | 1.16        | 2.02       | 1.54         | 1.50       | 1.49         | 3.06       | 1.70         |
| C9orf72  | chromosome 9 open reading frame          | chr9p21.2            | cell death                              | ---                                        | 2.26          | 1.41            | -1.17     | -1.19       | -1.42     | 1.03        | 2.09       | 1.32         | 1.96       | 1.83         | 2.43       | 2.42         |
| C9orf84  | chromosome 9 open reading frame          | chr9q31.3            | 0                                       | ---                                        | 1.33          | 1.12            | 1.26      | 1.33        | -1.21     | -1.36       | -1.16      | -1.49        | -1.63      | -6.29        | -3.16      | -5.41        |
| C9orf85  | chromosome 9 open reading frame          | chr9q21.13           | 0                                       | ---                                        | -1.18         | -1.06           | -1.01     | -1.24       | -1.05     | 1.18        | 1.02       | -1.06        | -1.86      | -1.50        | -4.55      | -3.64        |
| C9orf85  | chromosome 9 open reading frame          | chr9q21.13           | 0                                       | ---                                        | -1.33         | -1.34           | 1.12      | 1.77        | -2.94     | -1.02       | 2.49       | 2.18         | -1.64      | 1.29         | -1.43      | -2.24        |
| C9orf89  | chromosome 9 open reading frame          | chr9q22.31           | negative regulation of I-kappaB kinase  | ---                                        | 1.10          | 1.12            | -1.01     | -1.08       | 1.11      | 1.02        | 1.12       | 1.02         | 1.74       | 1.56         | 1.41       | 1.21         |
| C9orf91  | chromosome 9 open reading frame          | chr9q32              | 0                                       | ---                                        | 1.06          | 1.03            | -1.02     | -1.04       | -1.02     | -1.03       | 1.01       | 1.10         | -1.41      | -1.01        | -1.28      | -1.38        |
| C9orf96  | chromosome 9 open reading frame          | chr9q34.2            | protein phosphorylation                 | ---                                        | -1.77         | -2.03           | -1.40     | 1.12        | 1.19      | -1.05       | -1.27      | 1.37         | -2.09      | -1.69        | 1.49       | 2.45         |
| CA1      | carbonic anhydrase I                     | chr8q21.2            | one-carbon metabolic process            | ---                                        | -1.21         | -1.77           | -1.05     | 1.00        | -1.61     | -1.46       | 1.12       | -1.62        | 1.28       | -1.11        | 1.12       | 1.72         |
| CA11     | carbonic anhydrase XI                    | chr19q13.3           | 0                                       | ---                                        | 1.04          | -1.06           | 1.05      | 1.10        | 1.02      | 1.06        | 1.04       | 1.16         | -1.52      | -1.34        | -1.64      | -1.04        |
| CA12     | carbonic anhydrase XII                   | chr15q22             | one-carbon metabolic process            | ---                                        | 1.06          | -1.14           | 1.28      | -1.01       | -1.07     | -1.01       | 1.18       | 1.01         | 2.58       | 3.23         | 2.80       | 3.40         |
| CA12     | carbonic anhydrase XII                   | chr15q22             | one-carbon metabolic process            | ---                                        | -1.12         | -1.13           | -1.03     | -1.07       | 1.12      | 1.15        | 1.03       | -1.00        | 2.00       | 2.19         | 2.29       | 2.62         |
| CA12     | carbonic anhydrase XII                   | chr15q22             | one-carbon metabolic process            | ---                                        | -1.08         | -1.05           | 1.05      | 1.04        | -1.02     | 1.11        | 1.30       | 1.17         | 1.87       | 2.64         | 1.92       | 2.35         |
| CA12     | carbonic anhydrase XII                   | chr15q22             | one-carbon metabolic process            | ---                                        | -1.02         | 1.14            | -1.41     | -1.07       | 1.50      | 1.26        | -1.24      | -1.11        | 1.44       | 2.12         | 1.73       | 1.93         |
| CA12     | carbonic anhydrase XII                   | chr15q22             | one-carbon metabolic process            | ---                                        | -1.03         | -1.01           | 1.11      | 1.06        | 1.07      | 1.09        | 1.29       | 1.05         | 2.52       | 2.93         | 2.43       | 2.77         |
| CA13     | carbonic anhydrase XIII                  | chr8q21.2            | one-carbon metabolic process            | ---                                        | -1.04         | -1.25           | 1.04      | 1.15        | -1.23     | 1.09        | -1.68      | -1.09        | -1.54      | -1.37        | -2.41      | -3.08        |
| CA2      | carbonic anhydrase II                    | chr8q22              | kidney development                      | ---                                        | 1.28          | 1.30            | 1.13      | 1.05        | -1.08     | 1.10        | -1.42      | -1.28        | 1.21       | 1.23         | 1.09       | 1.01         |
| CA3      | carbonic anhydrase III, muscle           | chr8q21.2            | one-carbon metabolic process            | ---                                        | 4.17          | 5.26            | 3.07      | 1.98        | 1.04      | -1.47       | -2.38      | -23.19       | 10.97      | 7.62         | 6.81       | 9.88         |
| CA5B     | carbonic anhydrase VB, muscle            | chrXp21.1            | one-carbon metabolic process            | ---                                        | 1.25          | -1.18           | 1.28      | -1.79       | -1.66     | 1.56        | 1.48       | 1.13         | 5.56       | 3.74         | 7.10       | 6.97         |
| CA5BP1   | carbonic anhydrase VB pseudogene         | chrXp22.2            | 0                                       | ---                                        | -1.02         | -1.15           | 1.03      | 1.15        | 1.13      | 1.07        | 1.08       | 1.00         | -1.11      | -1.33        | 1.28       | 1.66         |
| CA5BP1   | carbonic anhydrase VB pseudogene         | chrXp22.2            | 0                                       | ---                                        | -1.03         | 1.05            | 1.29      | -1.14       | 1.10      | 1.22        | -1.19      | -1.15        | -2.11      | -1.96        | -1.57      | -1.55        |
| CA8      | carbonic anhydrase VIII                  | chr8q12.1            | one-carbon metabolic process            | ---                                        | 1.11          | -1.00           | -3.13     | 1.11        | 2.33      | 1.43        | 3.30       | 1.94         | 2.76       | 4.78         | -1.38      | 1.06         |
| CA9      | carbonic anhydrase IX                    | chr9p13.3            | morphogenesis of an epithelium          | ---                                        | -1.13         | -1.24           | 1.04      | -1.04       | 1.11      | 1.17        | 1.11       | -1.01        | 1.31       | 1.29         | 1.39       | 1.63         |
| CAAP1    | caspase activity and apoptosis           | chr9p21.2            | apoptotic process                       | ---                                        | -1.01         | -1.03           | -1.14     | 1.01        | -1.10     | 1.11        | -1.11      | -1.03        | -1.28      | -1.18        | -1.03      | -1.10        |
| CAB39    | calcium binding protein 39               | chr2q37.1            | cell cycle arrest                       | ---                                        | 1.06          | 1.15            | 1.03      | -1.08       | 1.06      | -1.08       | 1.07       | -1.07        | 1.04       | 1.08         | 1.30       | 1.21         |
| CAB39L   | calcium binding protein 39, long isoform | chr13q14.2           | cell cycle arrest                       | ---                                        | 1.13          | 1.41            | 1.50      | 1.18        | -1.03     | -1.08       | -1.17      | 1.10         | 1.23       | 1.20         | 1.93       | 1.71         |
| CAB39L   | calcium binding protein 39, long isoform | chr13q14.2           | cell cycle arrest                       | ---                                        | 2.42          | 1.74            | 1.39      | -1.08       | -1.31     | 1.21        | 1.10       | -1.16        | -1.38      | -1.06        | 2.02       | 2.21         |
| CAB39L   | calcium binding protein 39, long isoform | chr13q14.2           | cell cycle arrest                       | ---                                        | 1.18          | 1.21            | 1.50      | 1.87        | 1.34      | 1.16        | -1.71      | 1.04         | -1.17      | -1.10        | 2.15       | 1.79         |
| CABIN1   | calcineurin binding protein              | chr22q11.23          | cell surface receptor signaling pathway | ---                                        | 1.04          | 1.00            | 1.02      | 1.20        | -1.07     | -1.02       | -1.13      | -1.04        | 1.22       | 1.44         | -1.16      | 1.13         |
| CABIN1   | calcineurin binding protein              | chr22q11.23          | cell surface receptor signaling pathway | ---                                        | -1.12         | -1.10           | 1.02      | -1.04       | 1.03      | 1.00        | 1.23       | -1.07        | 1.41       | 1.25         | 1.13       | 1.26         |
| CABLES1  | Cdk5 and Abl enzyme subunit              | chr18q11.2           | cell cycle                              | ---                                        | -1.02         | -1.10           | -1.01     | -1.09       | 1.03      | -1.01       | 1.08       | 1.08         | -3.04      | -2.31        | -2.84      | -2.62        |
| CABLES1  | Cdk5 and Abl enzyme subunit              | chr18q11.2           | cell cycle                              | ---                                        | -1.12         | -1.13           | 1.10      | 1.19        | 1.08      | 1.02        | 1.10       | 1.05         | -2.22      | -2.23        | -1.85      | -1.78        |
| CABLES2  | Cdk5 and Abl enzyme subunit              | chr20q13.33          | cell cycle                              | ---                                        | 1.08          | -1.01           | 1.14      | 1.15        | 1.03      | -1.04       | -1.06      | -1.12        | -1.48      | -1.05        | -1.73      | -1.40        |
| CABP4    | calcium binding protein 4                | chr11q13.2           | signal transduction                     | ---                                        | 1.09          | 1.05            | -1.27     | -1.03       | 1.12      | 1.29        | -1.15      | 1.49         | -1.41      | -1.92        | -2.09      | -2.01        |
| CABP7    | calcium binding protein 7                | chr22q12.2           | 0                                       | ---                                        | 1.84          | 1.81            | -1.39     | 1.11        | -1.02     | -1.31       | 1.03       | 1.34         | 1.13       | 1.23         | -1.54      | -2.01        |
| CABYR    | calcium binding tyrosine                 | chr18q11.2           | ciliary or flagellar motility           | ---                                        | 1.13          | -1.03           | -1.08     | 1.17        | 1.00      | -1.23       | 1.43       | 1.35         | 1.81       | -1.11        | 1.49       | 1.95         |
| CABYR    | calcium binding tyrosine                 | chr18q11.2           | ciliary or flagellar motility           | ---                                        | 1.14          | 1.01            | -1.08     | 1.13        | 1.07      | -1.24       | 1.04       | -1.02        | 1.19       | -1.01        | 1.39       | 1.73         |
| CACNA1C  | calcium channel, voltage-dependent       | chr12p13.3           | energy reserve metabolic process        | Calcium_regulation_in_cardiac_cells // Gen | 3.14          | 2.66            | -1.23     | -1.31       | -3.26     | -1.10       | -1.85      | -1.55        | -1.75      | 2.12         | -2.11      | -2.09        |
| CACNA1C  | calcium channel, voltage-dependent       | chr12p13.3           | energy reserve metabolic process        | Calcium_regulation_in_cardiac_cells // Gen | -1.19         | -1.90           | 1.05      | 1.90        | -7.95     | -2.97       | 2.81       | 3.52         | -1.47      | -2.08        | -2.12      | -1.37        |
| CACNA1C  | calcium channel, voltage-dependent       | chr12p13.3           | energy reserve metabolic process        | Calcium_regulation_in_cardiac_cells // Gen | 3.51          | 2.12            | 1.32      | -1.67       | -1.94     | -1.03       | -9.18      | -4.01        | -1.18      | -2.17        | -1.42      | -1.09        |
| CACNA1D  | calcium channel, voltage-dependent       | chr3p14.3            | energy reserve metabolic process        | Calcium_regulation_in_cardiac_cells // Gen | 1.26          | 1.13            | -2.03     | -2.59       | -2.55     | -1.59       | -1.67      | 1.40         | 1.55       | 1.77         | 2.23       | 2.09         |
| CACNA1D  | calcium channel, voltage-dependent       | chr3p14.3            | energy reserve metabolic process        | Calcium_regulation_in_cardiac_cells // Gen | 1.01          | -1.10           | -1.16     | 1.09        | 1.12      | -1.08       | -1.42      | 1.01         | -1.50      | -1.29        | -2.05      | -1.63        |
| CACNA1P  | calcium channel, voltage-dependent       | chrXp11.23           | transport                               | ---                                        | 1.52          | 2.46            | 1.09      | -1.81       | -1.94     | -5.46       | 1.02       | 2.31         | -2.23      | 1.64         | -1.31      | 1.39         |
| CACNA1G  | calcium channel, voltage-dependent       | chr17q22             | regulation of action potential          | ---                                        | -1.47         | -1.50           | 1.12      | 1.33        | 1.40      | 1.53        | -1.23      | 1.08         | 2.57       | 2.57         | 1.81       | -1.13        |
| CACNA2D1 | calcium channel, voltage-dependent       | chr7q21-q22          | transport                               | ---                                        | 1.18          | 1.17            | -1.00     | -1.03       | -1.01     | -1.02       | -1.08      | 1.14         | -1.47      | -1.20        | -1.28      | -1.66        |
| CACNA2D2 | calcium channel, voltage-dependent       | chr3p21.3            | energy reserve metabolic process        | ---                                        | 2.65          | 1.55            | 1.64      | 1.30        | 1.30      | 1.12        | 1.01       | -1.89        | 1.38       | -1.45        | 1.27       | 1.15         |
| CACNA2D3 | calcium channel, voltage-dependent       | chr3p21.1            | transport                               | ---                                        | 1.08          | 1.11            | 1.05      | 1.23        | 1.15      | 1.07        | -1.00      | -1.03        | -1.44      | -1.23        | -1.10      | 1.02         |
| CACNA2D4 | calcium channel, voltage-dependent       | chr12p13.33          | transport                               | ---                                        | 1.23          | -2.27           | 1.20      | 1.72        | -1.00     | 1.14        | 1.35       | 1.48         | -2.37      | -1.50        | -3.63      | -2.61        |
| CACNB1   | calcium channel, voltage-dependent       | chr17q21-q22         | protein targeting to membrane           | Calcium_regulation_in_cardiac_cells // Gen | 1.09          | -1.12           | -1.00     | -1.35       | 1.14      | -1.11       | -1.18      | -1.01        | 1.29       | -1.43        | 2.56       | 2.79         |
| CACNB2   | calcium channel, voltage-dependent       | chr10p12             | transport                               | ---                                        | -1.59         | -1.76           | -1.36     | 1.26        | -1.22     | 1.25        | -1.37      | -1.82        | -5.82      | -1.73        | -2.33      | -3.07        |
| CACNB3   | calcium channel, voltage-dependent       | chr12q13             | transport                               | Calcium_regulation_in_cardiac_cells // Gen | 1.15          | 1.06            | -1.11     | 1.05        | -1.03     | -1.16       | 1.06       | -1.05        | 1.14       | 1.11         | 1.21       | 1.26         |
| CACNB3   | calcium channel, voltage-dependent       | chr12q13             | transport                               | Calcium_regulation_in_cardiac_cells // Gen | -1.12         | -1.27           | -1.12     | 1.05        | 1.21      | 1.02        | -1.46      | -1.03        | 1.27       | 1.18         | 1.23       | 1.20         |

| ID          | Gene Title                  | Chromosomal Location | 1st Gene Ontology Biological Process      | Pathway                                     | A2497 30 mins | A2497P' 30 mins | A2497 2 h | A2497P' 2 h | A2497 4 h | A2497P' 4 h | A2497 24 h | A2497P' 24 h | A2497 48 h | A2497P' 48 h | A2497 72 h | A2497P' 72 h |
|-------------|-----------------------------|----------------------|-------------------------------------------|---------------------------------------------|---------------|-----------------|-----------|-------------|-----------|-------------|------------|--------------|------------|--------------|------------|--------------|
| CACTIN      | cactin, spliceosome C comp  | chr19p13.3           | mRNA splicing, via spliceosome            | ---                                         | 1.16          | -1.06           | -1.24     | -1.21       | 1.10      | 1.45        | 1.35       | 1.66         | 1.16       | -1.49        | 1.11       | 1.28         |
| CACTIN      | cactin, spliceosome C comp  | chr19p13.3           | mRNA splicing, via spliceosome            | ---                                         | -1.05         | 1.07            | 1.12      | 1.09        | -1.31     | -1.37       | 1.14       | 1.04         | 1.79       | 1.38         | 1.40       | 1.78         |
| CACUL1      | CDK2-associated, cullin do  | chr10q26.11          | G1                                        | ---                                         | -1.10         | -1.24           | 1.08      | 1.04        | -1.04     | -1.01       | 1.16       | -1.16        | -1.08      | 1.16         | -1.03      | 1.23         |
| CACUL1      | CDK2-associated, cullin do  | chr10q26.11          | G1                                        | ---                                         | 1.02          | 1.00            | -1.07     | -1.02       | -1.04     | 1.02        | -1.01      | 1.07         | -1.08      | 1.04         | -1.05      | -1.05        |
| CACUL1      | CDK2-associated, cullin do  | chr10q26.11          | G1                                        | ---                                         | -1.11         | -1.23           | 1.15      | 1.15        | 1.17      | 1.07        | 1.11       | -1.07        | 1.28       | 1.26         | -1.05      | -1.01        |
| CACUL1      | CDK2-associated, cullin do  | chr10q26.11          | G1                                        | ---                                         | 1.07          | -1.18           | 1.09      | 1.14        | -1.08     | -1.06       | 1.18       | -1.03        | 1.34       | 1.52         | -1.04      | -1.13        |
| CACYBP      | calcyclin binding protein   | chr1q24-q25          | heart development                         | ---                                         | 1.18          | 1.08            | -1.01     | 1.17        | 1.04      | 1.08        | -1.19      | -1.18        | -2.87      | -2.26        | -3.38      | -2.65        |
| CACYBP      | calcyclin binding protein   | chr1q24-q25          | heart development                         | ---                                         | -1.00         | 1.02            | -1.06     | 1.02        | -1.01     | 1.04        | -1.12      | -1.11        | -1.03      | -1.06        | -1.25      | -1.21        |
| CAD         | carbamoyl-phosphate synth   | chr2p22-p21          | pyrimidine nucleobase metabolic process   | ---                                         | 1.28          | 1.16            | -1.35     | 1.06        | -1.03     | -1.08       | -1.24      | -1.14        | 1.84       | 1.33         | -1.01      | 1.50         |
| CADM1       | cell adhesion molecule 1    | chr11q23.2           | liver development                         | ---                                         | 2.59          | 1.65            | -3.15     | -4.33       | 1.07      | -2.20       | 1.15       | -1.04        | 1.77       | 2.03         | 2.81       | 3.14         |
| CADM2       | cell adhesion molecule 2    | chr3p12.1            | cell adhesion                             | ---                                         | -1.01         | -1.22           | 1.10      | 1.24        | -1.30     | -1.02       | 1.42       | 1.28         | -2.06      | -1.41        | -3.47      | -2.94        |
| CADM2       | cell adhesion molecule 2    | chr3p12.1            | cell adhesion                             | ---                                         | 1.31          | -1.06           | 1.57      | 1.49        | -1.42     | 1.17        | -1.02      | 1.66         | -3.47      | -2.90        | -4.54      | -5.16        |
| CALB1       | calbindin 1, 28kDa          | chr8q21.3            | learning or memory                        | ---                                         | 1.58          | 1.05            | 1.25      | 1.86        | 2.20      | -1.31       | 1.66       | 3.36         | 1.73       | 1.76         | 2.26       | 1.41         |
| CALB2       | calbindin 2                 | chr16q22.2           | 0                                         | ---                                         | 2.32          | 1.55            | 1.15      | 2.15        | 1.16      | 1.12        | 1.67       | -1.11        | 2.38       | 1.88         | -1.92      | 2.86         |
| CALCOCO1    | calcium binding and coiled  | chr12q13.13          | transcription, DNA-dependent              | ---                                         | 1.03          | -1.09           | -1.02     | 1.04        | 1.13      | 1.04        | 1.09       | 1.01         | -1.74      | -1.61        | -1.73      | -1.39        |
| CALCOCO2    | calcium binding and coiled  | chr17q21.32          | viral reproduction                        | ---                                         | 1.00          | -1.28           | -1.18     | -1.17       | 1.10      | 1.00        | -1.15      | 1.27         | -1.20      | -1.07        | 1.14       | 1.26         |
| CALD1       | caldesmon 1                 | chr7q33              | cellular component movement               | ---                                         | 1.81          | -1.10           | 1.29      | 1.51        | -1.13     | 1.03        | 1.26       | -1.36        | -2.28      | -1.67        | -3.44      | -2.11        |
| CALD1       | caldesmon 1                 | chr7q33              | cellular component movement               | ---                                         | 1.07          | 1.07            | 1.02      | 1.02        | 1.07      | 1.10        | -1.13      | -1.17        | -1.08      | 1.01         | -1.26      | -1.31        |
| CALHM2      | calcium homeostasis modul   | chr10q24.33          | transport                                 | ---                                         | -1.00         | -1.15           | -1.26     | -1.23       | 1.09      | 1.17        | 1.37       | 1.30         | -1.11      | -1.18        | -1.66      | -1.31        |
| CALHM2      | calcium homeostasis modul   | chr10q24.33          | transport                                 | ---                                         | 1.09          | -1.08           | -1.38     | -1.29       | -1.09     | -1.09       | 1.04       | -1.33        | -1.14      | -1.23        | -1.79      | -2.00        |
| CALM1       | calmodulin 1 (phosphoryla   | chr14q32.11          | 0                                         | ---                                         | 1.17          | 1.06            | 1.05      | -1.16       | -1.17     | 1.13        | -1.31      | -1.20        | -1.18      | -1.40        | -1.23      | -1.45        |
| CALM1 /// C | calmodulin 1 (phosphoryla   | chr14q32.11 /// chr1 | response to amphetamine                   | Calcium_regulation_in_cardiac_cells // Gent | 1.09          | 1.14            | 1.01      | 1.03        | 1.02      | 1.02        | -1.48      | -1.30        | -1.83      | -1.51        | -1.36      | -1.49        |
| CALM1 /// C | calmodulin 1 (phosphoryla   | chr14q32.11 /// chr1 | response to amphetamine                   | Calcium_regulation_in_cardiac_cells // Gent | 1.01          | 1.07            | -1.02     | -1.04       | 1.02      | -1.02       | -1.36      | -1.25        | -1.63      | -1.30        | -1.49      | -1.54        |
| CALM1 /// C | calmodulin 1 (phosphoryla   | chr14q32.11 /// chr1 | response to amphetamine                   | Calcium_regulation_in_cardiac_cells // Gent | -1.03         | 1.03            | -1.02     | -1.04       | 1.00      | -1.01       | -1.04      | -1.04        | 1.01       | -1.00        | -1.14      | -1.16        |
| CALM1 /// C | calmodulin 1 (phosphoryla   | chr14q32.11 /// chr1 | response to amphetamine                   | Calcium_regulation_in_cardiac_cells // Gent | -1.04         | 1.01            | 1.02      | -1.01       | 1.06      | -1.01       | 1.02       | -1.03        | 1.08       | 1.03         | -1.10      | -1.12        |
| CALML4      | calmodulin-like 4           | chr15q23             | 0                                         | ---                                         | 1.31          | 1.23            | 1.33      | -1.01       | 1.10      | 1.16        | 1.22       | 1.13         | 2.62       | 2.46         | 2.73       | 1.91         |
| CALML4      | calmodulin-like 4           | chr15q23             | 0                                         | ---                                         | 1.12          | 1.09            | 1.18      | 1.09        | -1.04     | -1.10       | 1.16       | 1.19         | 2.49       | 2.32         | 1.97       | 1.70         |
| CALU        | calumenin                   | chr7q32.1            | platelet degranulation                    | ---                                         | -1.06         | 1.00            | -1.02     | 1.01        | 1.09      | -1.03       | -1.19      | -1.17        | 1.09       | 1.16         | 1.61       | 2.05         |
| CALU        | calumenin                   | chr7q32.1            | platelet degranulation                    | ---                                         | -1.08         | -1.01           | 1.02      | -1.14       | 1.20      | -1.00       | -1.11      | -1.14        | 1.18       | 1.20         | 1.63       | 1.78         |
| CALU        | calumenin                   | chr7q32.1            | platelet degranulation                    | ---                                         | -1.06         | -1.02           | 1.07      | -1.05       | 1.11      | -1.07       | -1.11      | -1.16        | 1.13       | 1.21         | 1.46       | 1.36         |
| CALU        | calumenin                   | chr7q32.1            | platelet degranulation                    | ---                                         | 1.21          | 1.16            | 1.11      | 1.02        | 1.09      | 1.02        | -1.28      | -1.18        | 1.54       | 1.50         | 1.73       | 1.67         |
| CAMK1       | calcium/calmodulin-depend   | chr3q25.3            | protein phosphorylation                   | Calcium_regulation_in_cardiac_cells // Gent | -1.05         | -1.14           | 1.26      | -1.18       | 1.27      | -1.02       | 1.07       | -1.09        | -1.42      | -1.25        | -2.05      | -1.71        |
| CAMK1       | calcium/calmodulin-depend   | chr3q25.3            | protein phosphorylation                   | Calcium_regulation_in_cardiac_cells // Gent | -1.01         | -1.04           | -1.12     | -1.08       | 1.16      | 1.05        | 1.20       | -1.06        | -1.01      | -1.04        | -2.32      | -1.99        |
| CAMK1D      | calcium/calmodulin-depend   | chr10p13             | protein phosphorylation                   | ---                                         | 1.00          | -1.01           | 1.08      | 1.01        | 1.04      | 1.14        | 1.09       | 1.21         | -1.21      | -1.11        | -1.71      | -1.69        |
| CAMK1D ///  | calcium/calmodulin-depend   | chr10p13             | protein phosphorylation                   | ---                                         | -1.24         | -1.19           | 1.12      | 1.09        | 1.03      | 1.01        | 1.00       | 1.09         | -1.63      | -1.31        | -1.89      | -1.59        |
| CAMK1D ///  | calcium/calmodulin-depend   | chr10p13             | protein phosphorylation                   | ---                                         | -1.02         | -1.06           | 1.01      | -1.15       | 1.06      | 1.06        | -1.04      | 1.06         | -1.75      | -1.54        | -2.15      | -1.73        |
| CAMK2D      | calcium/calmodulin-depend   | chr4q26              | G1                                        | Calcium_regulation_in_cardiac_cells // Gent | 1.09          | 1.09            | -1.10     | -1.05       | 1.10      | -1.05       | -1.07      | 1.00         | 1.14       | 1.27         | 1.04       | 1.10         |
| CAMK4       | calcium/calmodulin-depend   | chr5q21.3            | myeloid dendritic cell cytokine product   | Calcium_regulation_in_cardiac_cells // Gent | -1.16         | -1.23           | -1.25     | 1.14        | 1.14      | 1.08        | 1.24       | 1.08         | -1.20      | -1.46        | -2.71      | -1.27        |
| CAMKK1      | calcium/calmodulin-depend   | chr17p13.2           | protein phosphorylation                   | ---                                         | 1.20          | 1.13            | 1.00      | 1.07        | 1.02      | -1.05       | 1.21       | 1.04         | -1.51      | -1.38        | -1.38      | -1.23        |
| CAMKK2      | calcium/calmodulin-depend   | chr12q24.2           | MAPK cascade                              | ---                                         | -1.06         | -1.12           | 1.00      | -1.00       | 1.02      | -1.08       | 1.03       | -1.08        | -1.31      | -1.35        | -1.23      | -1.11        |
| CAMKK2      | calcium/calmodulin-depend   | chr12q24.2           | MAPK cascade                              | ---                                         | -1.34         | -1.06           | 1.00      | -1.05       | -1.02     | -1.18       | 1.02       | 1.11         | -1.32      | -1.20        | -1.44      | -1.37        |
| CAMKMT      | calmodulin-lysine N-methyl  | chr2p21              | methylation                               | ---                                         | 1.27          | 1.20            | 1.15      | 1.01        | -1.11     | -1.10       | -1.08      | 1.02         | -1.29      | 1.03         | -1.44      | -1.69        |
| CAMSAP1     | calmodulin regulated spect  | chr9q34.3            | cytoskeleton organization                 | ---                                         | -1.08         | 1.08            | -1.14     | -1.22       | -1.08     | -1.01       | -1.35      | -1.55        | -1.46      | -3.61        | -2.05      | -2.87        |
| CAMSAP1     | calmodulin regulated spect  | chr9q34.3            | cytoskeleton organization                 | ---                                         | 1.12          | 1.26            | 1.26      | 1.28        | 1.06      | -1.07       | 1.08       | 1.44         | -1.31      | -1.14        | -1.47      | -1.25        |
| CAMSAP1     | calmodulin regulated spect  | chr9q34.3            | cytoskeleton organization                 | ---                                         | 1.03          | -1.01           | 1.04      | 1.02        | 1.11      | 1.15        | 1.06       | 1.06         | -1.20      | -1.23        | -1.04      | 1.01         |
| CAMSAP1     | calmodulin regulated spect  | chr9q34.3            | cytoskeleton organization                 | ---                                         | -1.01         | -1.09           | 1.12      | 1.05        | -1.08     | 1.09        | -1.32      | -1.05        | -1.46      | -1.19        | -1.22      | -1.13        |
| CAMSAP2     | calmodulin regulated spect  | chr1q32.1            | 0                                         | ---                                         | 1.13          | 1.13            | 1.06      | -1.02       | -1.10     | -1.02       | -1.33      | -1.09        | -1.40      | -1.37        | -1.22      | -1.47        |
| CAMSAP2     | calmodulin regulated spect  | chr1q32.1            | 0                                         | ---                                         | 1.03          | 1.06            | 1.09      | -1.13       | -1.12     | -1.12       | -1.18      | -1.08        | -1.96      | -1.66        | -1.52      | -1.96        |
| CAMSAP2     | calmodulin regulated spect  | chr1q32.1            | 0                                         | ---                                         | -1.04         | -1.02           | 1.08      | -1.02       | 1.08      | 1.06        | -1.08      | 1.01         | -1.10      | -1.03        | 1.02       | 1.17         |
| CAMSAP3     | calmodulin regulated spect  | chr19p13.2           | negative regulation of phosphatase activi | ---                                         | -1.39         | -1.41           | 1.35      | 1.79        | 1.93      | 1.96        | 1.62       | 1.21         | 1.02       | 1.22         | 2.64       | 2.02         |
| CAMTA1      | calmodulin binding transcr  | chr1p36.31-p36.23    | transcription, DNA-dependent              | ---                                         | -1.38         | -1.23           | -1.14     | -1.13       | 1.03      | -1.07       | 1.24       | 1.13         | 1.43       | 1.51         | 1.20       | -1.00        |
| CAMTA1      | calmodulin binding transcr  | chr1p36.31-p36.23    | transcription, DNA-dependent              | ---                                         | -1.05         | -1.01           | -1.08     | -1.10       | 1.03      | -1.24       | -1.09      | -1.08        | 1.06       | -1.16        | -1.31      | -1.31        |
| CAMTA1      | calmodulin binding transcr  | chr1p36.31-p36.23    | transcription, DNA-dependent              | ---                                         | -1.11         | -1.08           | 1.11      | 1.01        | -1.01     | -1.00       | -1.01      | -1.01        | -1.09      | -1.11        | -1.40      | -1.50        |
| CAMTA1      | calmodulin binding transcr  | chr1p36.31-p36.23    | transcription, DNA-dependent              | ---                                         | 1.03          | 1.12            | 2.02      | 2.14        | -1.01     | 1.14        | 1.96       | 1.34         | 1.38       | 1.53         | 1.47       | 1.96         |
| CAMTA2      | calmodulin binding transcr  | chr17p13.2           | transcription, DNA-dependent              | ---                                         | -1.04         | -1.10           | 1.19      | 1.22        | 1.22      | 1.03        | 1.19       | 1.20         | 2.70       | 1.98         | 2.00       | 2.13         |
| CAND1       | cullin-associated and neddy | chr12q14             | transcription, DNA-dependent              | ---                                         | -1.14         | -1.01           | 1.01      | -1.09       | 1.14      | 1.02        | -1.41      | -1.39        | -1.74      | -1.50        | -2.39      | -2.40        |
| CAND1       | cullin-associated and neddy | chr12q14             | transcription, DNA-dependent              | ---                                         | -1.05         | -1.23           | -1.01     | -1.14       | 1.14      | 1.16        | -1.60      | -1.23        | -1.55      | -1.18        | -1.51      | -1.41        |
| CAND1       | cullin-associated and neddy | chr12q14             | transcription, DNA-dependent              | ---                                         | 1.01          | 1.07            | -1.02     | -1.01       | -1.02     | 1.06        | -1.14      | -1.06        | -1.40      | -1.41        | -1.11      | -1.17        |
| CAND1       | cullin-associated and neddy | chr12q14             | transcription, DNA-dependent              | ---                                         | 1.11          | 1.05            | 1.03      | 1.07        | -1.08     | 1.07        | -1.26      | -1.36        | -1.24      | -1.30        | -1.28      | -1.28        |
| CAND2       | cullin-associated and neddy | chr3p25.2            | transcription, DNA-dependent              | ---                                         | 1.63          | 1.80            | -1.11     | 1.64        | -1.95     | -1.11       | -1.38      | -3.32        | 3.53       | 6.17         | -1.85      | -2.02        |
| CAND2       | cullin-associated and neddy | chr3p25.2            | transcription, DNA-dependent              | ---                                         | -1.13         | -1.01           | 1.13      | 1.37        | 1.06      | 1.15        | -1.33      | -1.10        | -1.67      | -1.18        | -1.40      | -1.22        |
| CANT1       | calcium activated nucleoti  | chr17q25.3           | signal transduction                       | ---                                         | 1.05          | -1.23           | -1.26     | 1.02        | 1.17      | -1.01       | -1.15      | -1.20        | 2.31       | 1.67         | 3.02       | 2.11         |
| CANT1       | calcium activated nucleoti  | chr17q25.3           | signal transduction                       | ---                                         | -1.03         | -1.02           | 1.09      | 1.14        | 1.02      | -1.12       | -1.03      | 1.02         | 1.23       | 1.12         | 1.28       | 1.28         |
| CANT1       | calcium activated nucleoti  | chr17q25.3           | signal transduction                       | ---                                         | 1.03          | 1.01            | 1.08      | 1.16        | 1.09      | 1.05        | -1.06      | -1.04        | 1.18       | 1.16         | 1.23       | 1.31         |
| CANX        | calnexin                    | chr5q35              | antigen processing and presentation of pe | ---                                         | 1.17          | 1.22            | 1.02      | -1.08       | -1.05     | -1.06       | 1.04       | -1.11        | 1.01       | 1.02         | 1.55       | 1.36         |
| CANX        | calnexin                    | chr5q35              | antigen processing and presentation of pe | ---                                         | -1.46         | -1.48           | -1.58     | -1.13       | 1.80      | 2.14        | -1.33      | -1.05        | -1.66      | -2.08        | -1.46      | -1.39        |















| ID            | Gene Title                  | Chromosomal Location | 1st Gene Ontology Biological Process       | Pathway                                        | A2497 30 mins | A2497P' 30 mins | A2497 2 h | A2497P' 2 h | A2497 4 h | A2497P' 4 h | A2497 24 h | A2497P' 24 h | A2497 48 h | A2497P' 48 h | A2497 72 h | A2497P' 72 h |
|---------------|-----------------------------|----------------------|--------------------------------------------|------------------------------------------------|---------------|-----------------|-----------|-------------|-----------|-------------|------------|--------------|------------|--------------|------------|--------------|
| CDR2          | cerebellar degeneration-rel | chr16p12.3           | 0                                          | ---                                            | 1.13          | -1.03           | 1.16      | -1.13       | 1.13      | 1.38        | -1.21      | -1.09        | 1.54       | 1.54         | 2.25       | 2.12         |
| CDR2L         | cerebellar degeneration-rel | chr17q25.1           | 0                                          | ---                                            | 1.06          | 1.01            | 1.14      | 1.11        | 1.05      | 1.01        | 1.02       | -1.01        | 1.43       | 1.35         | 1.35       | 1.48         |
| CDRT1         | CMT1A duplicated region     | chr17p12             | 0                                          | ---                                            | -1.02         | 1.32            | -1.16     | -1.09       | -1.52     | -1.95       | -2.40      | -1.01        | 2.01       | 1.51         | 8.05       | 7.69         |
| CDRT1         | CMT1A duplicated region     | chr17p12             | 0                                          | ---                                            | -2.22         | -1.19           | -1.06     | -1.66       | -1.56     | -1.68       | -1.71      | -1.79        | -1.83      | -1.85        | 2.10       | 1.01         |
| CDRT4 /// TV  | CMT1A duplicated region     | chr17p /// chr17p12  | transcription, DNA-dependent               | ---                                            | -1.29         | -1.27           | -1.03     | 1.00        | 1.18      | 1.27        | 1.22       | -1.10        | 1.37       | 1.70         | 1.10       | 1.53         |
| CDRT4 /// TV  | CMT1A duplicated region     | chr17p /// chr17p12  | transcription, DNA-dependent               | ---                                            | -1.17         | -1.29           | 1.04      | -1.10       | 1.10      | 1.03        | 1.23       | 1.10         | 1.60       | 1.45         | 1.41       | 1.65         |
| CDS1          | CDP-diacylglycerol synthase | chr4q21.23           | lipid metabolic process                    | ---                                            | 1.30          | 1.23            | -1.03     | 1.04        | 1.31      | 1.09        | -1.41      | -1.21        | 1.04       | 1.18         | 1.23       | 1.48         |
| CDS1          | CDP-diacylglycerol synthase | chr4q21.23           | lipid metabolic process                    | ---                                            | 1.01          | -1.05           | -1.30     | -1.39       | -1.14     | 1.26        | -1.02      | 1.06         | 1.06       | 1.34         | 1.13       | 1.18         |
| CDS1          | CDP-diacylglycerol synthase | chr4q21.23           | phospholipid metabolic process             | ---                                            | 1.19          | 1.35            | -1.38     | 1.58        | -2.21     | 1.63        | 1.15       | 1.57         | 4.89       | 4.91         | -1.15      | -1.24        |
| CDS2          | CDP-diacylglycerol synthase | chr20p13             | lipid metabolic process                    | ---                                            | -1.01         | 1.01            | 1.02      | -1.03       | -1.03     | -1.08       | -1.01      | -1.05        | -3.09      | -2.68        | -3.11      | -3.53        |
| CDS2          | CDP-diacylglycerol synthase | chr20p13             | lipid metabolic process                    | ---                                            | 1.07          | 1.05            | 1.07      | -1.04       | 1.18      | 1.08        | -1.05      | -1.01        | -3.22      | -2.79        | -2.41      | -2.13        |
| CDS2          | CDP-diacylglycerol synthase | chr20p13             | lipid metabolic process                    | ---                                            | -1.04         | 1.06            | -1.01     | -1.05       | 1.02      | 1.05        | 1.09       | 1.01         | -1.35      | -1.26        | -1.76      | -1.73        |
| CDT1          | chromatin licensing and DNA | chr16q24.3           | DNA replication checkpoint                 | DNA_replication_Reactome // GenMAPP            | -1.02         | -1.07           | 1.01      | 1.03        | -1.08     | -1.21       | 1.92       | 1.50         | -1.04      | -1.08        | 1.01       | -1.02        |
| CDV3          | CDV3 homolog (mouse)        | chr3q22.1            | cell proliferation                         | ---                                            | -1.11         | -1.20           | 1.06      | -1.06       | 1.13      | -1.01       | 1.58       | 1.27         | -1.01      | -1.20        | 1.18       | 1.28         |
| CDV3          | CDV3 homolog (mouse)        | chr3q22.1            | cell proliferation                         | ---                                            | 1.01          | 1.05            | -1.05     | 1.04        | 1.05      | -1.16       | 1.60       | 1.65         | 1.73       | 1.40         | 1.93       | 1.85         |
| CDYL          | chromodomain protein, Y-j   | chr6p25.1            | transcription, DNA-dependent               | ---                                            | 1.09          | -1.02           | -1.02     | 1.14        | 1.08      | 1.05        | 1.43       | 1.28         | 3.52       | 2.18         | 2.57       | 2.16         |
| CDYL          | chromodomain protein, Y-j   | chr6p25.1            | transcription, DNA-dependent               | ---                                            | -1.04         | -1.01           | -1.08     | -1.09       | -1.02     | 1.08        | -1.14      | -1.08        | -1.22      | -1.01        | 1.17       | 1.08         |
| CDYL2         | chromodomain protein, Y-j   | chr16q23.2           | metabolic process                          | ---                                            | -1.09         | 1.02            | 1.00      | 1.12        | -1.10     | 1.05        | 1.05       | 1.10         | 1.03       | 1.19         | 1.78       | 1.53         |
| CEACAM1       | carcinoembryonic antigen    | chr19q13.2           | angiogenesis                               | ---                                            | -1.34         | -1.41           | -1.09     | 1.09        | 1.29      | 1.12        | -1.09      | -1.15        | 1.35       | -1.01        | 1.36       | 1.26         |
| CEACAM1       | carcinoembryonic antigen    | chr19q13.2           | angiogenesis                               | ---                                            | 1.19          | -1.31           | 1.44      | 2.09        | -1.34     | 1.11        | -2.39      | -1.44        | 9.20       | 2.73         | -1.17      | -1.46        |
| CEACAM1       | carcinoembryonic antigen    | chr19q13.2           | angiogenesis                               | ---                                            | 1.31          | -1.07           | 1.12      | 5.80        | 3.54      | 1.66        | 2.01       | 10.02        | 3.51       | 1.21         | 1.03       | 8.32         |
| CEACAM19      | carcinoembryonic antigen    | chr19q13.31          | 0                                          | ---                                            | 2.08          | 1.79            | 1.28      | 1.85        | -1.28     | 1.08        | -2.51      | -1.21        | 1.37       | 1.19         | 1.67       | 2.41         |
| CEACAM21      | carcinoembryonic antigen    | chr19q13.2           | 0                                          | ---                                            | -2.52         | -1.58           | -1.90     | 1.03        | 1.26      | -2.28       | -1.43      | 1.59         | 1.25       | -1.89        | 1.05       | -1.24        |
| CEACAM7       | carcinoembryonic antigen    | chr19q13.2           | 0                                          | ---                                            | 5.62          | -1.16           | -5.95     | -1.87       | 1.76      | 1.38        | 7.19       | 10.00        | -1.39      | -4.56        | -2.86      | 4.47         |
| CEACAM7       | carcinoembryonic antigen    | chr19q13.2           | 0                                          | ---                                            | -1.46         | -1.29           | 1.35      | -1.42       | 1.06      | 1.04        | 2.27       | 2.50         | 8.85       | 6.27         | -1.13      | 1.44         |
| CEBPB         | CCAAT/enhancer binding      | chr20q13.1           | embryonic placenta development             | Circadian_Exercise // GenMAPP /// Ovarian      | 1.15          | 1.18            | -1.06     | -1.30       | -1.14     | 1.05        | 1.21       | 1.07         | 1.51       | 1.47         | 1.65       | 1.24         |
| CEBPD         | CCAAT/enhancer binding      | chr8p11.2-p11.1      | transcription, DNA-dependent               | ---                                            | 1.31          | 1.44            | -1.01     | -1.04       | -1.13     | -1.13       | 1.55       | 1.22         | 2.01       | 1.80         | 1.86       | 1.58         |
| CEBPD         | CCAAT/enhancer binding      | chr8p11.2-p11.1      | transcription, DNA-dependent               | ---                                            | 1.18          | 1.02            | 1.06      | -1.13       | 1.14      | 1.08        | 1.09       | 2.29         | 2.64       | -1.01        | 1.24       | 1.24         |
| CEBPZ         | CCAAT/enhancer binding      | chr19q13.11          | liver development                          | ---                                            | -1.00         | -1.07           | 1.02      | 1.01        | 1.04      | 1.02        | 1.05       | -1.02        | 1.25       | 1.12         | 1.39       | 1.45         |
| CEBPZ         | CCAAT/enhancer binding      | chr2p22.2            | transcription, DNA-dependent               | ---                                            | 1.00          | 1.04            | 1.05      | 1.07        | 1.06      | -1.03       | 1.10       | 1.15         | 1.34       | 1.07         | 1.45       | 1.47         |
| CECR3         | cat eye syndrome chromosome | ---                  | 0                                          | ---                                            | -1.89         | -1.32           | -1.28     | -1.63       | -1.70     | -1.64       | -1.07      | -1.30        | 1.36       | 1.13         | -1.10      | -1.46        |
| CECR5-AS1     | CECR5 antisense RNA 1       | chr22q11.1           | 0                                          | ---                                            | 1.41          | 1.02            | 1.77      | 2.99        | 2.33      | 1.49        | -1.53      | -1.68        | -1.75      | -2.48        | 1.47       | 1.33         |
| CECR7         | cat eye syndrome chromosome | chr22q11.1           | 0                                          | ---                                            | -1.06         | -1.12           | 1.11      | 1.13        | -1.05     | 1.07        | -1.82      | -1.47        | -1.71      | -1.53        | -1.49      | -1.35        |
| CELF1         | CUGBP, Elav-like family     | chr11p11             | mRNA splice site selection                 | mRNA_processing_Reactome // GenMAPP            | -1.06         | -1.00           | 1.20      | 1.24        | 1.13      | -1.02       | -1.30      | -1.60        | -1.09      | -1.07        | 1.17       | -1.12        |
| CELF1         | CUGBP, Elav-like family     | chr11p11             | mRNA splice site selection                 | mRNA_processing_Reactome // GenMAPP            | -1.18         | -1.09           | -1.05     | 1.02        | -1.05     | -1.08       | -1.07      | 1.09         | 1.19       | 1.03         | -1.04      | 1.01         |
| CELF2         | CUGBP, Elav-like family     | chr10p13             | mRNA splice site selection                 | mRNA_processing_Reactome // GenMAPP            | 1.54          | 1.15            | 1.05      | 1.09        | 1.02      | 1.29        | -2.23      | -1.14        | 1.01       | -1.26        | -2.37      | -1.14        |
| CELF2         | CUGBP, Elav-like family     | chr10p13             | mRNA splice site selection                 | mRNA_processing_Reactome // GenMAPP            | -1.23         | 1.07            | 1.31      | 1.50        | 1.04      | -1.12       | 1.08       | 1.38         | -1.26      | -1.14        | -1.18      | -1.36        |
| CELF2         | CUGBP, Elav-like family     | chr10p13             | RNA processing                             | mRNA_processing_Reactome // GenMAPP            | 1.78          | 1.05            | -1.29     | 1.44        | 1.85      | 1.91        | 1.71       | 2.34         | 1.49       | 1.22         | 1.90       | 1.22         |
| CELF2         | CUGBP, Elav-like family     | chr10p13             | mRNA splice site selection                 | mRNA_processing_Reactome // GenMAPP            | -1.09         | -1.15           | -1.06     | -1.14       | 1.11      | 1.03        | -1.08      | -1.15        | -2.31      | -1.73        | -2.22      | -2.29        |
| CELF2         | CUGBP, Elav-like family     | chr10p13             | mRNA splice site selection                 | mRNA_processing_Reactome // GenMAPP            | 1.21          | 1.08            | -1.12     | -1.12       | 1.11      | 1.14        | 1.03       | 1.30         | -1.93      | -1.29        | -2.41      | -2.81        |
| CELF3         | CUGBP, Elav-like family     | chr19q21             | regulation of alternative mRNA splicing    | ---                                            | -1.05         | 1.27            | 1.40      | -1.74       | 1.45      | 6.49        | -1.35      | -1.92        | -1.46      | -1.44        | -1.34      | -1.48        |
| CELF4         | CUGBP, Elav-like family     | chr18q12             | alternative mRNA splicing, via spliceosome | ---                                            | -1.04         | -1.14           | 1.02      | 1.09        | 1.42      | 1.12        | -1.53      | -1.32        | -1.01      | -1.24        | 1.82       | 1.45         |
| CELF4         | CUGBP, Elav-like family     | chr18q12             | alternative mRNA splicing, via spliceosome | ---                                            | 1.15          | 1.07            | 5.33      | 4.02        | 3.16      | 9.63        | 1.76       | 1.44         | -1.00      | 1.07         | -1.09      | -1.22        |
| CELSR1        | cadherin, EGF LAG seven-    | chr22q13.3           | establishment of planar polarity           | GPCRDB_Other // GenMAPP                        | 1.02          | 1.21            | 1.19      | 1.64        | -1.06     | -1.42       | -1.03      | -1.00        | -1.03      | -1.43        | -1.38      | -1.20        |
| CELSR1        | cadherin, EGF LAG seven-    | chr22q13.3           | establishment of planar polarity           | GPCRDB_Other // GenMAPP                        | 1.12          | 1.05            | 1.04      | 1.16        | 1.15      | 1.09        | 1.06       | -1.07        | -1.30      | -1.07        | -1.32      | -1.28        |
| CELSR2        | cadherin, EGF LAG seven-    | chr1p21              | neuron migration                           | GPCRDB_Other // GenMAPP                        | 1.03          | 1.02            | 1.04      | 1.02        | -1.03     | 1.13        | -1.13      | -1.01        | -1.68      | -1.22        | -1.83      | -1.85        |
| CELSR2        | cadherin, EGF LAG seven-    | chr1p21              | neuron migration                           | GPCRDB_Other // GenMAPP                        | 1.14          | 1.10            | -1.00     | 1.03        | -1.05     | 1.05        | -1.15      | -1.04        | -1.38      | -1.22        | -1.64      | -1.75        |
| CELSR3        | cadherin, EGF LAG seven-    | chr3p21.31           | neuron migration                           | GPCRDB_Other // GenMAPP                        | -1.22         | -1.18           | -1.05     | 1.04        | -1.02     | -1.01       | 1.09       | 1.03         | -1.54      | -1.33        | -1.14      | 1.03         |
| CELSR3        | cadherin, EGF LAG seven-    | chr3p21.31           | neuron migration                           | GPCRDB_Other // GenMAPP                        | -1.16         | -1.18           | -1.01     | 1.01        | 1.03      | 1.05        | -1.02      | -1.01        | -1.46      | -1.29        | -1.16      | 1.04         |
| CENPA         | centromere protein A        | chr2p23.3            | M phase of mitotic cell cycle              | ---                                            | 1.15          | 1.08            | 1.33      | 1.12        | -1.19     | -1.18       | -1.09      | -1.08        | 1.72       | 1.46         | 1.85       | 2.08         |
| CENPA /// SL  | centromere protein A /// so | chr2p23.3            | M phase of mitotic cell cycle              | ---                                            | 1.02          | 1.00            | -1.01     | -1.02       | 1.03      | -1.05       | -1.12      | -1.09        | 1.06       | -1.00        | 1.41       | 1.29         |
| CENPBD1       | CENPB DNA-binding domain    | chr16q24.3           | 0                                          | ---                                            | -1.24         | -1.21           | 1.18      | -1.02       | -1.21     | -1.12       | -1.05      | -1.13        | -1.79      | -1.01        | -1.66      | -1.21        |
| CENPBD1       | CENPB DNA-binding domain    | chr16q24.3           | 0                                          | ---                                            | -1.03         | -1.09           | 1.01      | -1.13       | 1.05      | 1.02        | -1.02      | -1.04        | -1.45      | -1.68        | -1.44      | -1.30        |
| CENPC1        | centromere protein C, 1     | chr4q13.2            | M phase of mitotic cell cycle              | ---                                            | 1.04          | -1.06           | -1.01     | 1.06        | 1.03      | 1.23        | -1.06      | 1.01         | -1.19      | 1.10         | 1.32       | 1.29         |
| CENPE         | centromere protein E, 312k  | chr4q24-q25          | M phase of mitotic cell cycle              | ---                                            | 1.17          | 1.15            | 1.08      | 1.08        | -1.08     | -1.04       | -1.26      | -1.10        | -1.51      | -1.47        | -1.03      | -1.15        |
| CENPF         | centromere protein F, 350k  | chr1q41              | G2 phase of mitotic cell cycle             | ---                                            | 1.01          | -1.02           | 1.03      | 1.09        | 1.04      | -1.00       | -1.04      | -1.01        | -1.23      | -1.23        | -1.10      | 1.04         |
| CENPF         | centromere protein F, 350k  | chr1q41              | G2 phase of mitotic cell cycle             | ---                                            | 1.01          | 1.13            | -1.03     | -1.13       | -1.09     | -1.05       | -1.41      | -1.07        | -1.84      | -1.89        | -1.41      | -1.45        |
| CENPI         | centromere protein I        | chrXq22.1            | M phase of mitotic cell cycle              | ---                                            | -1.02         | -1.05           | 1.00      | -1.00       | 1.03      | -1.03       | 1.00       | 1.08         | -1.38      | -1.72        | 1.14       | 1.25         |
| CENPI         | centromere protein I        | chrXq22.1            | M phase of mitotic cell cycle              | ---                                            | -1.17         | -1.27           | 1.13      | 1.20        | 1.18      | -1.04       | -1.28      | -1.02        | 1.09       | -1.07        | 1.20       | 1.36         |
| CENPJ         | centromere protein J        | chr13q12.12          | G2                                         | ---                                            | -1.02         | -1.00           | 1.07      | 1.17        | 1.24      | 1.13        | -1.05      | 1.01         | 1.21       | 1.20         | 1.33       | 1.29         |
| CENPJ         | centromere protein J        | chr13q12.12          | G2                                         | ---                                            | 1.16          | 1.08            | 1.07      | 1.11        | 1.10      | -1.02       | 1.08       | 1.04         | 1.29       | 1.06         | 1.25       | 1.39         |
| CENPJ         | centromere protein J        | chr13q12.12          | G2                                         | ---                                            | 1.14          | 1.24            | 1.34      | 1.34        | 1.05      | -1.13       | -1.12      | 1.00         | 1.34       | 1.22         | 1.50       | 1.50         |
| CENPK         | centromere protein K        | chr5q12.3            | M phase of mitotic cell cycle              | ---                                            | 1.17          | 1.19            | 1.07      | -1.08       | -1.04     | 1.27        | -1.44      | -1.12        | -1.71      | -1.54        | -2.43      | -2.93        |
| CENPN         | centromere protein N        | chr16q23.2           | M phase of mitotic cell cycle              | ---                                            | 1.15          | 1.13            | 1.06      | -1.01       | 1.15      | 1.07        | 1.06       | 1.04         | -1.35      | -1.35        | -1.35      | -1.46        |
| CENPO         | centromere protein O        | chr2p23.3            | M phase of mitotic cell cycle              | Calcium_regulation_in_cardiac_cells // GenMAPP | -1.00         | 1.01            | -1.01     | -1.03       | 1.02      | -1.02       | -1.12      | -1.09        | -1.31      | -1.28        | -1.27      | -1.22        |
| CENPPP /// LG | centromere protein P /// un | chr9q22.31           | M phase of mitotic cell cycle              | ---                                            | 1.13          | 1.09            | 1.15      | 1.09        | 1.11      | -1.17       | -1.15      | -1.25        | -3.82      | -3.98        | -9.49      | -6.63        |











| ID          | Gene Title                           | Chromosomal Location | 1st Gene Ontology Biological Process                       | Pathway                                  | A2497 30 mins | A2497P' 30 mins | A2497 2 h | A2497P' 2 h | A2497 4 h | A2497P' 4 h | A2497 24 h | A2497P' 24 h | A2497 48 h | A2497P' 48 h | A2497 72 h | A2497P' 72 h |
|-------------|--------------------------------------|----------------------|------------------------------------------------------------|------------------------------------------|---------------|-----------------|-----------|-------------|-----------|-------------|------------|--------------|------------|--------------|------------|--------------|
| CNR1        | cannabinoid receptor 1 (br)          | chr6q14-q15          | positive regulation of acute inflammatory response         | GPCRDB_Class_A_Rhodopsin-like // GenMAPP | 4.81          | 2.18            | -5.96     | -1.87       | -2.29     | 3.84        | -1.20      | -2.97        | 1.93       | 1.22         | -1.19      | -3.50        |
| CNST        | consortin, connexin sorting          | chr1q44              | negative regulation of phosphatase activity                | ---                                      | 1.27          | -1.02           | 1.20      | 1.16        | -1.24     | 1.01        | 1.10       | 1.05         | 1.79       | 1.66         | 2.11       | 1.72         |
| CNST        | consortin, connexin sorting          | chr1q44              | negative regulation of phosphatase activity                | ---                                      | 1.37          | 1.41            | -1.16     | -1.06       | 1.13      | 1.12        | 1.58       | 1.25         | 2.90       | 2.45         | 2.85       | 2.12         |
| CNTLN       | centlein, centrosomal protein        | chr9p22.2            | phosphorelay signal transduction system                    | ---                                      | -1.38         | -1.64           | 1.05      | 1.06        | 1.35      | 1.08        | -1.08      | -1.06        | -1.76      | -1.70        | -2.06      | -2.01        |
| CNTLN       | centlein, centrosomal protein        | chr9p22.2            | phosphorelay signal transduction system                    | ---                                      | 1.12          | 1.42            | -1.00     | 1.05        | -1.25     | -1.37       | -1.40      | -1.33        | -4.07      | -3.39        | -2.72      | -2.61        |
| CNTN1       | contactin 1                          | chr12q11-q12         | cell adhesion                                              | ---                                      | -1.06         | 1.04            | 1.14      | 1.12        | -1.02     | -1.08       | 1.32       | 1.11         | 1.20       | 1.06         | 1.10       | 1.32         |
| CNTN1       | contactin 1                          | chr12q11-q12         | cell adhesion                                              | ---                                      | 1.07          | 1.03            | 1.06      | 1.09        | 1.07      | 1.12        | -1.06      | -1.06        | -1.26      | -1.15        | -1.36      | -1.21        |
| CNTN1       | contactin 1                          | chr12q11-q12         | cell adhesion                                              | ---                                      | 1.21          | 1.25            | 1.14      | -1.01       | -1.08     | -1.09       | -1.19      | 1.09         | -1.88      | -1.46        | -1.72      | -2.08        |
| CNTNAP1     | contactin associated protein         | chr17q21             | protein localization to paranode region of myelinated axon | ---                                      | -1.01         | -1.11           | 1.14      | 1.22        | 1.02      | -1.25       | 1.28       | 1.05         | 1.47       | 1.45         | 1.36       | 1.67         |
| CNTNAP2     | contactin associated protein         | chr7q35              | cell adhesion                                              | ---                                      | -1.78         | -4.23           | -1.28     | -1.64       | -1.22     | 1.34        | -2.08      | -1.40        | 10.88      | 9.77         | 5.57       | 8.96         |
| CNTNAP4     | contactin associated protein         | chr16q23.1           | cell adhesion                                              | ---                                      | -1.05         | 1.15            | 1.10      | 2.19        | -1.22     | -2.01       | -1.12      | -1.00        | 1.07       | 1.00         | 1.07       | 1.78         |
| CNTNAP4     | contactin associated protein         | chr16q23.1           | cell adhesion                                              | ---                                      | 1.17          | -1.41           | -2.40     | 1.53        | 1.31      | -1.36       | 1.28       | -4.09        | 2.25       | 3.33         | 21.78      | 30.13        |
| CNTNAP5     | contactin associated protein         | chr2q14.3            | cell adhesion                                              | ---                                      | -1.14         | 12.44           | 1.13      | 1.54        | -2.53     | -1.07       | 3.35       | 1.39         | 1.10       | -4.91        | -1.19      | -2.51        |
| CNTNAP5     | contactin associated protein         | chr2q14.3            | cell adhesion                                              | ---                                      | 4.08          | 2.64            | 1.52      | -1.99       | 1.02      | 1.59        | 4.98       | 2.83         | 5.29       | 5.27         | 1.01       | 2.30         |
| CNTRL       | centriolin                           | chr9q33.2            | G2                                                         | ---                                      | -1.01         | 1.02            | 1.09      | 1.08        | 1.09      | 1.05        | -1.07      | 1.05         | -2.93      | -2.12        | -3.42      | -2.51        |
| COA1        | cytochrome c oxidase assembly factor | chr7p13              | mitochondrial respiratory chain complex                    | Fatty_Acid_Synthesis // GenMAPP          | 1.01          | -1.02           | -1.05     | -1.02       | 1.04      | 1.01        | 1.07       | -1.07        | 1.23       | 1.25         | 1.27       | 1.30         |
| COA5        | cytochrome c oxidase assembly factor | chr2q11.2            | 0                                                          | ---                                      | -1.03         | 1.05            | -1.00     | 1.03        | -1.03     | -1.06       | -1.14      | -1.07        | -1.23      | -1.17        | -1.14      | -1.18        |
| COA5        | cytochrome c oxidase assembly factor | chr2q11.2            | 0                                                          | ---                                      | 1.05          | -1.19           | -1.10     | -1.01       | 1.01      | -1.14       | 1.05       | -1.02        | 1.30       | 1.24         | 1.48       | 1.58         |
| COA6        | cytochrome c oxidase assembly factor | chr1q42.2            | 0                                                          | ---                                      | -1.14         | -1.12           | -1.06     | 1.01        | 1.00      | -1.02       | 1.02       | 1.12         | 1.39       | 1.29         | 1.25       | 1.35         |
| COBL        | cordon-bleu WH2 repeat protein       | chr7p12.1            | embryonic axis specification                               | ---                                      | -1.06         | -1.06           | 1.03      | 1.01        | 1.11      | -1.03       | 1.07       | 1.05         | -1.48      | -1.46        | -1.39      | -1.32        |
| COBL        | cordon-bleu WH2 repeat protein       | chr7p12.1            | embryonic axis specification                               | ---                                      | -1.04         | 1.02            | 1.00      | -1.29       | 1.08      | 1.04        | -1.02      | -1.12        | 1.24       | -1.01        | 1.46       | 1.33         |
| COBL1       | cordon-bleu WH2 repeat protein       | chr2q24.3            | 0                                                          | ---                                      | 1.25          | 1.07            | -1.06     | -1.15       | 1.39      | 1.10        | 1.26       | 1.50         | 2.47       | 2.54         | 1.63       | 1.47         |
| COCH        | cochlin                              | chr14q11.2-q13       | sensory perception of sound                                | ---                                      | -1.05         | -1.04           | 1.02      | 1.13        | -1.10     | -1.19       | 1.04       | -1.11        | -1.15      | -1.05        | -1.31      | -1.31        |
| COCH        | cochlin                              | chr14q11.2-q13       | sensory perception of sound                                | ---                                      | -1.10         | 1.02            | -1.13     | -1.03       | -1.01     | -1.04       | -1.24      | -1.09        | -1.16      | -1.14        | -1.62      | -1.32        |
| COG1        | component of oligomeric glycoprotein | chr17q25.1           | transport                                                  | ---                                      | -1.12         | -1.12           | 1.07      | 1.12        | 1.03      | -1.11       | 1.12       | 1.18         | 1.44       | 1.14         | 1.21       | 1.46         |
| COG2        | component of oligomeric glycoprotein | chr1q42.2            | protein glycosylation                                      | ---                                      | 1.01          | 1.01            | 1.03      | 1.04        | 1.01      | -1.06       | -1.01      | -1.06        | -1.55      | -1.86        | -1.12      | -1.28        |
| COG3        | component of oligomeric glycoprotein | chr13q14.13          | protein glycosylation                                      | ---                                      | -1.03         | 1.07            | 1.14      | -1.22       | 1.73      | 1.19        | 1.88       | 1.87         | 1.03       | 1.14         | 1.75       | 1.19         |
| COG3        | component of oligomeric glycoprotein | chr13q14.13          | protein glycosylation                                      | ---                                      | 1.29          | -1.01           | 1.16      | 1.14        | 1.65      | 1.58        | 1.05       | 1.11         | 2.33       | 1.89         | 1.77       | 1.38         |
| COG5        | component of oligomeric glycoprotein | chr7q31              | transport                                                  | ---                                      | -1.02         | 1.01            | 1.04      | -1.06       | 1.10      | 1.01        | 1.20       | -1.05        | -1.18      | -1.08        | 1.26       | 1.15         |
| COG6        | component of oligomeric glycoprotein | chr13q14.11          | transport                                                  | ---                                      | 1.48          | 1.15            | -1.43     | -1.75       | 1.30      | 1.42        | -1.04      | -1.24        | -1.30      | -1.50        | 1.10       | 1.25         |
| COG7        | component of oligomeric glycoprotein | chr16p12.2           | protein glycosylation                                      | ---                                      | -1.17         | -1.26           | 1.07      | 1.06        | 1.03      | -1.09       | 1.05       | 1.03         | -1.00      | -1.10        | 1.14       | 1.41         |
| COG8        | component of oligomeric glycoprotein | chr16q22.1           | translation                                                | ---                                      | -1.04         | -1.04           | 1.00      | 1.04        | 1.10      | 1.02        | -1.14      | -1.07        | -1.47      | -1.29        | -1.55      | -1.21        |
| COG8        | component of oligomeric glycoprotein | chr16q22.1           | translation                                                | ---                                      | 1.01          | -1.04           | 1.03      | -1.01       | -1.18     | 1.03        | -1.14      | -1.04        | -1.40      | -1.43        | -1.50      | ---          |
| COIL        | coilin                               | chr17q22             | 0                                                          | ---                                      | -1.16         | -1.06           | 1.05      | -1.12       | 1.22      | 1.09        | 1.08       | -1.09        | 1.32       | 1.10         | 1.91       | 1.74         |
| COIL        | coilin                               | chr17q22             | 0                                                          | ---                                      | -1.06         | -1.01           | 1.03      | 1.08        | 1.04      | 1.01        | 1.02       | 1.01         | 1.17       | 1.02         | 1.52       | 1.43         |
| COL11A1     | collagen, type XI, alpha 1           | chr1p21              | cartilage condensation                                     | ---                                      | -1.66         | -1.44           | -1.59     | -2.35       | 1.30      | -1.39       | 1.51       | 1.44         | 1.17       | -1.06        | 2.13       | 1.64         |
| COL12A1     | collagen, type XII, alpha 1          | chr6q12-q13          | skeletal system development                                | ---                                      | -1.21         | -1.10           | 1.00      | 1.04        | 1.41      | 1.22        | -1.05      | -1.23        | -1.44      | -1.44        | -1.87      | -1.61        |
| COL12A1     | collagen, type XII, alpha 1          | chr6q12-q13          | skeletal system development                                | ---                                      | 1.16          | 1.19            | -1.02     | -1.12       | 1.02      | -1.00       | -1.11      | -1.04        | -1.47      | -1.44        | -1.89      | -2.13        |
| COL12A1     | collagen, type XII, alpha 1          | chr6q12-q13          | skeletal system development                                | ---                                      | 1.36          | 1.36            | 1.17      | 1.03        | -1.21     | -1.15       | -1.18      | -1.32        | -2.02      | -1.95        | -2.42      | -2.67        |
| COL13A1     | collagen, type XIII, alpha 1         | chr10q22             | ossification                                               | ---                                      | 3.63          | 4.22            | 1.11      | 4.87        | -1.29     | -9.50       | -3.95      | -1.16        | 18.75      | 6.46         | 2.18       | 6.87         |
| COL15A1     | collagen, type XV, alpha 1           | chr9q21-q22          | angiogenesis                                               | ---                                      | 1.10          | -1.05           | 1.11      | 1.11        | -1.01     | 1.13        | -1.11      | -1.17        | -1.50      | -1.14        | -1.38      | -1.28        |
| COL18A1     | collagen, type XVIII, alpha 1        | chr21q22.3           | angiogenesis                                               | ---                                      | -1.26         | -1.18           | -1.05     | -1.04       | 1.24      | -1.10       | 1.08       | -1.03        | -1.12      | -1.63        | -1.74      | -1.75        |
| COL18A1-AS1 | COL18A1 antisense RNA                | chr21q22.3           | 0                                                          | ---                                      | -2.37         | 1.38            | -1.66     | -1.10       | 1.05      | 3.29        | 1.21       | 1.53         | 1.69       | -1.52        | -2.60      | -1.52        |
| COL25A1     | collagen, type XXV, alpha 1          | chr4q25              | extracellular matrix disassembly                           | ---                                      | -1.23         | -1.18           | 1.13      | 1.08        | -1.36     | 1.41        | 1.28       | 1.22         | 1.86       | 1.41         | -1.23      | 1.01         |
| COL25A1     | collagen, type XXV, alpha 1          | chr4q25              | extracellular matrix disassembly                           | ---                                      | -1.10         | -1.13           | -1.02     | 1.03        | -1.08     | 1.18        | -1.01      | 1.07         | -1.24      | -1.06        | -1.73      | -1.72        |
| COL3A1      | collagen, type III, alpha 1          | chr2q31              | skeletal system development                                | Inflammatory_Response_Pathway // GenMAPP | -1.03         | -1.05           | -1.14     | -1.07       | -1.11     | 1.01        | -1.04      | 1.01         | -1.26      | -1.12        | -1.65      | -1.56        |
| COL3A1      | collagen, type III, alpha 1          | chr2q31              | skeletal system development                                | Inflammatory_Response_Pathway // GenMAPP | 1.20          | 1.21            | 1.00      | -1.03       | 1.01      | -1.00       | 1.05       | 1.07         | -1.51      | -1.33        | -1.94      | -1.92        |
| COL3A1      | collagen, type III, alpha 1          | chr2q31              | skeletal system development                                | Inflammatory_Response_Pathway // GenMAPP | 1.19          | 1.21            | 1.45      | 1.46        | -1.12     | 1.40        | -1.09      | 1.29         | -1.55      | -2.64        | -3.91      | -2.33        |
| COL3A1      | collagen, type III, alpha 1          | chr2q31              | skeletal system development                                | Inflammatory_Response_Pathway // GenMAPP | 1.10          | 1.19            | 1.04      | -1.08       | 1.07      | 1.05        | 1.05       | -1.00        | -1.46      | -1.33        | -1.94      | -1.89        |
| COL4A1      | collagen, type IV, alpha 1           | chr13q34             | angiogenesis                                               | ---                                      | -1.03         | 1.04            | 1.01      | -1.06       | 1.07      | 1.05        | 1.23       | 1.06         | 1.56       | 1.37         | 1.42       | 1.20         |
| COL4A1      | collagen, type IV, alpha 1           | chr13q34             | angiogenesis                                               | ---                                      | 1.26          | 1.33            | -1.04     | 1.03        | -1.04     | -1.05       | 1.25       | -1.18        | 1.84       | 1.39         | 1.70       | 1.69         |
| COL4A3      | collagen, type IV, alpha 3           | chr2q36-q37          | induction of apoptosis                                     | ---                                      | -1.03         | -1.16           | 1.06      | -1.10       | 1.16      | 1.24        | -1.29      | -1.08        | -1.91      | -1.28        | -1.20      | -1.36        |
| COL4A3BP    | collagen, type IV, alpha 3           | chr5q13.3            | cell morphogenesis                                         | ---                                      | -1.17         | -1.09           | 1.00      | 1.01        | -1.04     | -1.10       | 1.05       | -1.06        | 1.58       | 1.44         | 1.38       | 1.26         |
| COL4A3BP    | collagen, type IV, alpha 3           | chr5q13.3            | cell morphogenesis                                         | ---                                      | -1.02         | -1.05           | 1.00      | -1.03       | 1.19      | 1.10        | 1.09       | 1.09         | 1.40       | 1.33         | 1.41       | 1.58         |
| COL4A3BP    | collagen, type IV, alpha 3           | chr5q13.3            | cell morphogenesis                                         | ---                                      | 1.06          | -1.01           | 1.07      | 1.01        | -1.06     | -1.01       | 1.02       | 1.04         | 1.03       | 1.20         | 1.38       | 1.37         |
| COL4A3BP    | collagen, type IV, alpha 3           | chr5q13.3            | cell morphogenesis                                         | ---                                      | -1.10         | -1.06           | 1.24      | 1.01        | 1.11      | -1.02       | -1.06      | 1.06         | -1.17      | -1.02        | 1.11       | 1.16         |
| COL4A4      | collagen, type IV, alpha 4           | chr2q35-q37          | axon guidance                                              | ---                                      | 1.06          | 1.05            | 1.03      | 1.04        | -1.01     | 1.01        | -1.01      | -1.11        | -1.47      | -1.20        | -1.22      | -1.33        |
| COL4A5      | collagen, type IV, alpha 5           | chrXq22              | axon guidance                                              | ---                                      | 1.22          | 1.16            | -1.01     | -1.03       | -1.09     | 1.15        | -1.02      | -1.02        | -1.50      | -1.29        | -1.69      | -1.71        |
| COL4A6      | collagen, type IV, alpha 6           | chrXq22              | cell adhesion                                              | ---                                      | -1.03         | -1.01           | -1.08     | -1.02       | 1.00      | 1.06        | 1.08       | 1.02         | -1.18      | -1.18        | -1.13      | -1.18        |
| COL5A1      | collagen, type V, alpha 1            | chr9q34.2-q34.3      | blood vessel development                                   | ---                                      | -1.04         | -1.10           | -1.02     | 1.07        | -1.02     | -1.02       | 1.05       | 1.07         | 1.04       | 1.04         | -1.06      | 1.20         |
| COL5A1      | collagen, type V, alpha 1            | chr9q34.2-q34.3      | blood vessel development                                   | ---                                      | 1.14          | 1.27            | -1.04     | -1.02       | -1.16     | -1.11       | -1.12      | -1.13        | -1.05      | -1.03        | -1.06      | 1.06         |
| COL8A1      | collagen, type VIII, alpha 1         | chr3q12.3            | angiogenesis                                               | ---                                      | 1.16          | 1.17            | -1.01     | -1.01       | -1.02     | 1.11        | 1.12       | 1.01         | 1.15       | -1.00        | 1.19       | -1.13        |
| COL9A1      | collagen, type IX, alpha 1           | chr6q13              | tissue homeostasis                                         | ---                                      | 1.98          | 4.62            | -1.62     | -1.62       | -2.19     | 1.42        | -2.81      | -2.86        | 1.69       | -1.07        | 3.23       | 2.81         |
| COL9A2      | collagen, type IX, alpha 2           | chr1p33-p32          | skeletal system development                                | ---                                      | 1.35          | -1.17           | 3.38      | 3.61        | -1.59     | -3.02       | 2.07       | 2.59         | 2.91       | -1.89        | -3.34      | 2.58         |
| COLEC10     | collectin sub-family member          | chr8q23-q24.1        | 0                                                          | ---                                      | -1.88         | 1.00            | 7.74      | 6.27        | 4.09      | 1.59        | -1.57      | 1.46         | 3.37       | -1.32        | -1.37      | -1.84        |
| COLEC12     | collectin sub-family member          | chr18pter-p11.3      | pattern recognition receptor signaling pathway             | ---                                      | 1.40          | 3.92            | 1.03      | -2.88       | 1.02      | -1.22       | -1.60      | -4.14        | 10.37      | 5.14         | 2.07       | 3.14         |









| ID          | Gene Title                                | Chromosomal Location                                        | 1st Gene Ontology Biological Process | Pathway | A2497 30 mins | A2497P' 30 mins | A2497 2 h | A2497P' 2 h | A2497 4 h | A2497P' 4 h | A2497 24 h | A2497P' 24 h | A2497 48 h | A2497P' 48 h | A2497 72 h | A2497P' 72 h |
|-------------|-------------------------------------------|-------------------------------------------------------------|--------------------------------------|---------|---------------|-----------------|-----------|-------------|-----------|-------------|------------|--------------|------------|--------------|------------|--------------|
| CTB-193M12  | NULL /// NULL                             | ---                                                         | 0                                    | ---     | -1.12         | -1.02           | -1.01     | -1.03       | 1.08      | -1.02       | 1.09       | 1.03         | 1.62       | 1.47         | 1.55       | 1.70         |
| CTB-22K21.2 | NULL /// NULL                             | ---                                                         | 0                                    | ---     | -1.54         | -1.48           | 1.05      | 1.14        | 1.03      | 1.19        | 1.12       | 1.27         | 2.17       | 1.44         | 1.56       | 1.27         |
| CTB-31N19.3 | NULL /// NULL                             | ---                                                         | 0                                    | ---     | 1.04          | -3.71           | -1.25     | 2.55        | 2.23      | 1.47        | -1.15      | 1.03         | -1.72      | 1.58         | 9.69       | 4.89         |
| CTB-31O20.3 | NULL /// NULL                             | ---                                                         | 0                                    | ---     | 1.28          | 1.02            | -1.02     | 1.20        | 1.26      | 1.05        | 1.03       | -1.03        | 1.80       | 1.75         | -1.03      | 1.08         |
| CTB-31O20.5 | NULL /// NULL                             | ---                                                         | 0                                    | ---     | -1.10         | -1.79           | -1.23     | -1.64       | 1.03      | 1.59        | -1.44      | 1.68         | 2.42       | 3.02         | 1.16       | 2.12         |
| CTB-58E17.1 | NULL /// NULL                             | ---                                                         | 0                                    | ---     | -1.03         | 1.03            | 1.15      | -1.22       | -1.13     | -1.24       | -1.04      | -1.00        | -1.37      | -1.36        | -1.04      | -1.01        |
| CTB-58E17.7 | NULL /// NULL                             | ---                                                         | 0                                    | ---     | -1.12         | 1.20            | 1.46      | 1.56        | 1.31      | 1.17        | 1.00       | -1.05        | -1.27      | -1.27        | -2.03      | -1.35        |
| CTB-78F1.1  | NULL /// NULL                             | ---                                                         | 0                                    | ---     | 1.21          | 5.04            | -1.33     | -1.32       | -1.90     | -1.79       | -8.85      | -4.44        | 10.58      | 3.88         | -1.14      | -1.09        |
| CTB-89H12.4 | NULL /// NULL                             | ---                                                         | 0                                    | ---     | 1.06          | 1.01            | -1.05     | 1.42        | -1.09     | 1.02        | -1.32      | -1.12        | 1.47       | 1.15         | 1.58       | 1.78         |
| CTBP1-AS2   | CTBP1 antisense RNA 2 (hchr4p16.3         | ---                                                         | 0                                    | ---     | 1.09          | 1.05            | 1.07      | -1.10       | -1.05     | -1.02       | -1.10      | -1.04        | -1.91      | -1.48        | -1.23      | -1.48        |
| CTBP2       | C-terminal binding protein chr10q26.13    | transcription, DNA-dependent                                | ---                                  | ---     | -1.01         | -1.01           | 1.03      | -1.04       | 1.09      | 1.02        | 1.02       | 1.12         | 1.13       | 1.17         | 1.11       | 1.07         |
| CTBP2       | C-terminal binding protein chr10q26.13    | transcription, DNA-dependent                                | ---                                  | ---     | -1.07         | -1.06           | -1.01     | -1.03       | 1.05      | -1.04       | 1.01       | 1.01         | 1.45       | 1.25         | 1.34       | 1.33         |
| CTBP2       | C-terminal binding protein chr10q26.13    | transcription, DNA-dependent                                | ---                                  | ---     | -1.06         | -1.02           | 1.06      | 1.01        | 1.02      | -1.07       | 1.14       | -1.01        | 1.46       | 1.32         | 1.44       | 1.40         |
| CTBP2       | C-terminal binding protein chr10q26.13    | transcription, DNA-dependent                                | ---                                  | ---     | -1.02         | -1.03           | 1.03      | -1.00       | 1.03      | -1.11       | 1.07       | -1.08        | 1.29       | 1.07         | 1.26       | 1.21         |
| CTBS        | chitobiose, di-N-acetyl- chr1p22          | carbohydrate metabolic process                              | ---                                  | ---     | -1.12         | -1.14           | -1.03     | -1.21       | -1.04     | 1.19        | -1.12      | 1.11         | 1.15       | -1.07        | 1.22       | -1.08        |
| CTBS        | chitobiose, di-N-acetyl- chr1p22          | carbohydrate metabolic process                              | ---                                  | ---     | 1.31          | 1.19            | -1.01     | -1.23       | 1.31      | 1.08        | 1.33       | 1.54         | 1.40       | 1.35         | 1.60       | 1.25         |
| CTC1        | CTS telomere maintenance chr17p13.1       | telomere maintenance                                        | ---                                  | ---     | -1.32         | 1.00            | -1.17     | -1.17       | 1.14      | 1.11        | -1.37      | -1.72        | -1.98      | -2.01        | -1.92      | -3.84        |
| CTC1        | CTS telomere maintenance chr17p13.1       | telomere maintenance                                        | ---                                  | ---     | 1.04          | -1.08           | -1.01     | 1.05        | 1.13      | -1.11       | 1.59       | 1.34         | 1.07       | -1.16        | -1.52      | -1.40        |
| CTC1        | CTS telomere maintenance chr17p13.1       | telomere maintenance                                        | ---                                  | ---     | 2.41          | 1.73            | 1.08      | -1.22       | 2.43      | 1.67        | 1.40       | -1.57        | 8.65       | 7.67         | -1.26      | -1.52        |
| CTC-203F4.2 | NULL /// NULL                             | ---                                                         | 0                                    | ---     | 1.30          | 1.33            | -1.55     | 1.19        | 1.58      | -1.01       | 1.05       | 1.32         | -1.19      | 1.01         | -1.96      | -2.47        |
| CTC-241N9.1 | NULL /// NULL                             | ---                                                         | 0                                    | ---     | 1.05          | -1.13           | 1.18      | 1.32        | 1.25      | 1.80        | -1.22      | -1.02        | -1.84      | -1.43        | -2.12      | -2.19        |
| CTC-276P9.1 | NULL /// NULL                             | ---                                                         | 0                                    | ---     | -1.00         | -1.09           | -1.42     | -1.00       | -1.22     | -1.19       | 1.12       | 1.43         | 1.35       | 1.47         | 1.14       | 1.18         |
| CTC-338M12  | NULL /// NULL                             | ---                                                         | 0                                    | ---     | 1.15          | 1.11            | 1.21      | 1.12        | 1.29      | 1.37        | -1.13      | 1.31         | -1.13      | 1.16         | 1.15       | 1.39         |
| CTC-351M12  | NULL /// NULL                             | ---                                                         | 0                                    | ---     | 1.19          | -1.06           | -1.01     | -1.22       | -1.12     | -1.34       | -2.02      | -1.32        | -2.56      | -2.17        | -7.57      | -2.89        |
| CTC-428G20  | NULL /// NULL                             | ---                                                         | 0                                    | ---     | -1.05         | 1.02            | 1.27      | 1.15        | -1.08     | 1.08        | -1.16      | 1.07         | -1.47      | -1.34        | -1.28      | -1.21        |
| CTC-429P9.3 | NULL /// NULL                             | ---                                                         | 0                                    | ---     | 1.08          | 1.06            | 1.19      | -1.01       | 1.15      | 1.16        | -1.32      | -1.20        | -1.76      | -1.72        | -1.92      | -1.76        |
| CTC-444N24  | NULL /// NULL                             | ---                                                         | 0                                    | ---     | -1.04         | -1.14           | 1.09      | 1.14        | -1.07     | -1.00       | -1.07      | 1.02         | -1.19      | -1.12        | -1.21      | -1.27        |
| CTC-459F4.3 | NULL /// NULL                             | ---                                                         | 0                                    | ---     | -1.03         | -1.02           | -1.02     | -1.17       | -1.08     | -1.01       | -1.10      | -1.09        | 1.12       | 1.05         | 1.42       | 1.33         |
| CTC-462L7.1 | NULL /// NULL                             | ---                                                         | 0                                    | ---     | 1.36          | 1.24            | 1.44      | 1.22        | -1.18     | -1.05       | 1.06       | 1.18         | -1.96      | -2.18        | -4.95      | -2.19        |
| CTC-467M3   | NULL /// NULL                             | ---                                                         | 0                                    | ---     | -1.54         | -1.47           | 1.28      | -2.20       | -1.95     | 1.05        | -1.09      | -1.57        | 1.59       | 3.93         | 1.17       | -2.27        |
| CTC-471C19  | NULL /// NULL                             | ---                                                         | 0                                    | ---     | -4.21         | -12.99          | 2.97      | 3.33        | -1.07     | 1.11        | 2.41       | 5.99         | -2.57      | -3.15        | 1.52       | 3.25         |
| CTC-471F3.6 | NULL /// NULL                             | ---                                                         | 0                                    | ---     | 2.00          | -1.42           | -1.62     | -1.25       | -1.89     | -1.48       | -1.07      | -1.12        | -3.27      | -3.89        | -1.82      | -1.60        |
| CTC-471F3.6 | NULL /// NULL                             | ---                                                         | 0                                    | ---     | 1.26          | -2.02           | 1.69      | 1.93        | -1.08     | -1.54       | 1.08       | 1.23         | -3.71      | -7.81        | -2.08      | -1.58        |
| CTC-471J1.2 | NULL /// NULL                             | ---                                                         | 0                                    | ---     | -1.06         | 1.03            | 1.09      | 1.33        | -1.18     | 1.17        | -1.40      | 1.19         | -1.40      | -1.53        | 1.56       | 1.71         |
| CTCF        | CCCTC-binding factor (zinc)chr16q21-q22.3 | DNA methylation                                             | ---                                  | ---     | -1.02         | 1.00            | 1.04      | 1.01        | 1.00      | -1.04       | -1.01      | -1.06        | -1.15      | -1.11        | -1.01      | -1.07        |
| CTD-208G02  | NULL /// NULL                             | ---                                                         | 0                                    | ---     | 1.05          | -1.10           | -1.31     | -1.82       | 1.85      | 1.45        | 1.30       | -1.17        | 2.46       | 5.38         | 1.84       | 2.08         |
| CTD-2132N1  | NULL /// NULL                             | ---                                                         | 0                                    | ---     | 1.40          | 1.14            | -1.02     | 1.09        | 1.08      | -1.66       | -1.06      | -1.16        | -1.65      | -1.73        | -1.69      | -1.61        |
| CTD-2260A1  | NULL /// NULL                             | ---                                                         | 0                                    | ---     | 1.00          | 1.29            | 1.10      | -1.14       | -1.00     | 1.03        | -1.25      | -1.05        | -1.29      | -1.34        | -1.17      | -1.16        |
| CTD-2260A1  | NULL /// NULL                             | ---                                                         | 0                                    | ---     | 1.10          | 1.12            | 1.10      | 1.09        | -1.11     | -1.14       | -1.33      | -1.25        | -1.89      | -1.23        | -2.36      | -2.01        |
| CTD-2267D1  | NULL /// NULL                             | ---                                                         | 0                                    | ---     | 1.14          | -1.05           | -1.32     | 1.11        | -1.02     | 1.16        | 1.56       | 1.06         | 1.54       | 1.07         | 2.06       | 1.63         |
| CTD-2291D1  | NULL /// NULL                             | ---                                                         | 0                                    | ---     | 6.03          | 5.96            | 1.40      | 1.78        | 3.77      | 2.53        | 1.74       | 1.25         | 2.52       | 1.48         | -2.62      | -1.11        |
| CTD-2292M1  | NULL /// NULL                             | ---                                                         | 0                                    | ---     | 1.16          | 1.19            | 1.02      | 1.23        | -1.17     | -1.10       | 1.02       | 1.07         | -1.54      | -1.20        | -2.70      | -2.37        |
| CTD-2311B1  | NULL /// NULL /// NULL                    | ---                                                         | 0                                    | ---     | -4.39         | -1.44           | 1.28      | -1.77       | -5.24     | -2.21       | -1.66      | 3.58         | 3.42       | 4.89         | -2.63      | -1.48        |
| CTD-2311B1  | NULL /// NULL                             | ---                                                         | 0                                    | ---     | -1.27         | 1.13            | 1.29      | 1.66        | 4.05      | 2.34        | -2.57      | -1.53        | 4.27       | 1.96         | 1.27       | 1.69         |
| CTD-2349P2  | NULL /// NULL                             | ---                                                         | 0                                    | ---     | 1.50          | 1.20            | -1.02     | -1.06       | -1.09     | 1.16        | -1.17      | -1.33        | -2.08      | -1.27        | -1.18      | -1.42        |
| CTD-2357A8  | NULL /// NULL                             | ---                                                         | 0                                    | ---     | 1.05          | -1.02           | 1.03      | 1.13        | -1.16     | -1.11       | 1.17       | 1.20         | 2.64       | 1.97         | 2.83       | 3.25         |
| CTD-2520I13 | NULL /// NULL                             | ---                                                         | 0                                    | ---     | -1.10         | -1.26           | -1.02     | -1.05       | -1.52     | -2.39       | 3.50       | 2.00         | 1.37       | 1.40         | 1.50       | -2.63        |
| CTD-2534I2  | NULL /// NULL                             | ---                                                         | 0                                    | ---     | -1.14         | 1.01            | 2.63      | 2.34        | 4.60      | 2.51        | -1.40      | -1.59        | 5.18       | 7.78         | 1.47       | 1.69         |
| CTD-2537I9  | NULL /// NULL                             | ---                                                         | 0                                    | ---     | 1.34          | 1.08            | 1.26      | 1.55        | 1.05      | 1.07        | -1.14      | 1.06         | 1.38       | 1.39         | 1.98       | 1.52         |
| CTD-2540F1  | NULL /// NULL                             | ---                                                         | 0                                    | ---     | 1.67          | 1.47            | 1.20      | 1.22        | -1.01     | -1.74       | -2.05      | -2.26        | -1.11      | -1.24        | 2.48       | 1.80         |
| CTD-2541J13 | NULL /// NULL /// NULL                    | ---                                                         | 0                                    | ---     | 2.64          | 3.31            | 1.67      | -1.04       | 1.08      | -1.10       | -1.07      | 1.74         | -1.85      | -1.21        | -1.23      | -1.02        |
| CTD-2587H2  | NULL /// NULL                             | ---                                                         | 0                                    | ---     | 1.07          | -1.74           | -1.81     | -1.24       | 1.03      | -3.06       | -1.14      | -1.13        | 2.45       | -1.27        | -2.14      | -1.37        |
| CTD-2616I11 | NULL /// NULL                             | ---                                                         | 0                                    | ---     | 2.13          | 1.06            | -1.21     | -2.70       | -2.36     | -2.00       | 1.38       | 1.32         | -1.04      | -1.20        | 1.63       | 2.80         |
| CTD-2643I7  | NULL /// NULL                             | ---                                                         | 0                                    | ---     | -1.04         | -1.33           | -1.14     | -1.35       | -2.31     | -1.18       | -1.03      | 1.07         | 1.46       | 1.04         | 1.03       | 1.15         |
| CTD-2643K1  | NULL /// NULL                             | ---                                                         | 0                                    | ---     | 1.57          | 2.60            | -1.55     | -2.53       | -1.47     | -8.17       | -2.35      | 1.08         | 1.82       | -1.55        | 2.49       | 4.63         |
| CTD-2647E9  | NULL /// NULL                             | ---                                                         | 0                                    | ---     | 1.69          | 1.04            | 1.07      | 1.61        | -2.47     | -1.80       | 1.29       | -1.05        | -1.86      | -2.62        | -2.35      | -1.96        |
| CTD-3014M2  | NULL /// NULL                             | ---                                                         | 0                                    | ---     | 1.19          | 1.15            | 1.05      | -1.41       | 1.20      | -1.05       | 1.19       | -1.05        | 1.97       | 2.17         | 2.83       | 2.91         |
| CTD-3064M3  | NULL /// NULL                             | ---                                                         | 0                                    | ---     | -1.08         | 2.34            | -1.15     | 2.15        | 1.56      | -1.10       | -2.32      | -1.81        | 1.49       | -1.30        | -1.40      | -1.73        |
| CTD-3074O7  | NULL /// NULL                             | ---                                                         | 0                                    | ---     | 1.63          | 1.14            | 1.67      | 1.37        | -3.53     | -1.42       | 3.56       | 3.49         | -2.54      | -2.18        | -2.62      | -3.08        |
| CTD-3074O7  | NULL /// NULL                             | ---                                                         | 0                                    | ---     | 1.03          | -1.70           | -1.43     | 1.39        | 1.13      | 1.25        | -1.55      | -1.36        | 1.03       | -1.62        | -3.84      | -3.29        |
| CTD-3138B1  | NULL /// NULL                             | ---                                                         | 0                                    | ---     | -1.04         | -1.01           | -1.06     | 1.23        | -1.19     | 1.02        | -1.14      | -1.03        | -1.10      | -1.06        | -1.45      | -1.26        |
| CTD-3203P2  | NULL /// NULL                             | ---                                                         | 0                                    | ---     | 1.25          | 1.13            | -1.17     | 1.07        | 1.20      | 1.47        | -1.43      | -1.66        | -2.08      | -3.79        | -1.80      | -3.63        |
| CTDP1       | CTD (carboxy-terminal domain)chr18q23     | transcription from RNA polymerase II promoter               | ---                                  | ---     | 1.00          | 1.19            | 1.12      | 1.05        | -1.13     | -1.18       | 1.07       | 1.02         | 1.13       | -1.14        | 1.51       | 1.22         |
| CTDSP1      | CTD (carboxy-terminal domain)chr2q35      | regulation of transcription from RNA polymerase II promoter | ---                                  | ---     | -1.10         | -1.10           | -1.04     | 1.03        | 1.03      | 1.02        | 1.09       | 1.14         | -1.15      | -1.05        | -1.44      | -1.31        |
| CTDSP2      | CTD (carboxy-terminal domain)chr12q14.1   | protein dephosphorylation                                   | ---                                  | ---     | 1.01          | 1.16            | -1.28     | -1.18       | 1.00      | -1.08       | -1.15      | 1.13         | -1.13      | -1.38        | -1.67      | -2.61        |
| CTDSP2      | CTD (carboxy-terminal domain)chr12q14.1   | protein dephosphorylation                                   | ---                                  | ---     | -1.11         | -1.01           | -1.25     | -1.16       | -1.25     | -1.03       | -1.39      | -1.09        | -1.68      | -1.16        | -1.64      | -1.88        |

| ID        | Gene Title                                     | Chromosomal Location | 1st Gene Ontology Biological Process                                 | Pathway                              | A2497 30 mins | A2497P' 30 mins | A2497 2 h | A2497P' 2 h | A2497 4 h | A2497P' 4 h | A2497 24 h | A2497P' 24 h | A2497 48 h | A2497P' 48 h | A2497 72 h | A2497P' 72 h |
|-----------|------------------------------------------------|----------------------|----------------------------------------------------------------------|--------------------------------------|---------------|-----------------|-----------|-------------|-----------|-------------|------------|--------------|------------|--------------|------------|--------------|
| CTDSPL    | CTD (carboxy-terminal domain)                  | chr3p21.3            | dephosphorylation                                                    | ---                                  | -1.03         | -1.03           | 1.05      | 1.09        | 1.02      | 1.13        | 1.11       | 1.05         | -1.13      | -1.13        | -1.63      | -1.30        |
| CTDSPL    | CTD (carboxy-terminal domain)                  | chr3p21.3            | dephosphorylation                                                    | ---                                  | 1.10          | 1.04            | 1.28      | 1.08        | 1.05      | -1.14       | 1.30       | -1.03        | -1.02      | -1.11        | -1.52      | -1.37        |
| CTDSPL    | CTD (carboxy-terminal domain)                  | chr3p21.3            | dephosphorylation                                                    | ---                                  | -1.12         | -1.10           | -1.05     | -1.03       | 1.09      | 1.09        | 1.12       | 1.11         | -1.25      | -1.16        | -1.93      | -1.91        |
| CTDSPL2   | CTD (carboxy-terminal domain)                  | chr15q15.3-q21.1     | dephosphorylation                                                    | ---                                  | -1.05         | -1.03           | 1.27      | 1.24        | -1.49     | -1.03       | 2.35       | 1.68         | 1.20       | 1.70         | 1.60       | 1.37         |
| CTH       | cystathionase (cystathionine gamma-lyase)      | chr1p31.1            | sulfur amino acid metabolic process                                  | ---                                  | 1.28          | 1.45            | 1.12      | -1.02       | 1.03      | -1.02       | -1.13      | -1.25        | 1.30       | 1.35         | 1.42       | -1.02        |
| CTHRC1    | collagen triple helix repeat                   | chr8q22.3            | cell migration                                                       | ---                                  | 1.16          | -1.09           | -1.02     | 1.04        | -1.09     | -1.23       | 1.54       | 1.84         | -1.54      | -1.65        | -1.95      | -1.80        |
| CTLA4     | cytotoxic T-lymphocyte-associated protein 4    | chr2q33              | immune response                                                      | ---                                  | 1.03          | 1.00            | -1.55     | -1.34       | 2.30      | 2.24        | -1.01      | 1.01         | 1.15       | 1.14         | 1.01       | -1.12        |
| CTNNA1    | catenin (cadherin-associated protein, p120cas) | chr5q31.2            | ovarian follicle development                                         | ---                                  | -1.03         | -1.04           | 1.04      | 1.08        | -1.01     | 1.06        | -1.08      | -1.18        | 1.08       | 1.14         | 1.07       | 1.13         |
| CTNNA3    | catenin (cadherin-associated protein, p120cas) | chr10q22.2           | cell adhesion                                                        | ---                                  | 2.88          | 1.96            | 5.99      | 2.85        | 1.45      | -1.52       | 1.40       | -4.90        | -1.72      | 1.48         | 1.97       | 11.45        |
| CTNBP1    | catenin (cadherin-associated protein, p120cas) | chr3p21              | negative regulation of transcription from RNA polymerase II promoter | TGF_Beta_Signaling_Pathway // GenMAP | 1.01          | 1.24            | -1.67     | -3.06       | -1.15     | -1.04       | -1.12      | -1.11        | 2.52       | 2.20         | 1.53       | 1.36         |
| CTNBP1    | catenin, beta interacting protein              | chr1p36.22           | negative regulation of transcription from RNA polymerase II promoter | ---                                  | -1.04         | -1.02           | -1.01     | 1.26        | 1.29      | -1.05       | 1.04       | 1.23         | 1.19       | 1.01         | -1.26      | 1.01         |
| CTNND1    | catenin (cadherin-associated protein, p120cas) | chr1q11              | morphogenesis of a polarized epithelium                              | ---                                  | 1.10          | 1.16            | -1.04     | -1.17       | -1.07     | 1.01        | -1.14      | -1.23        | -2.14      | -1.65        | -1.41      | -1.93        |
| CTNND1    | catenin (cadherin-associated protein, p120cas) | chr1q11              | morphogenesis of a polarized epithelium                              | ---                                  | 1.11          | 1.12            | 1.07      | -1.09       | -1.10     | 1.03        | -1.17      | -1.20        | -1.59      | -1.60        | -1.34      | -1.62        |
| CTNND1    | catenin (cadherin-associated protein, p120cas) | chr1q11              | morphogenesis of a polarized epithelium                              | ---                                  | 1.01          | 1.13            | 1.25      | 1.08        | 1.06      | 1.05        | -1.62      | -1.30        | -2.73      | -1.99        | -1.00      | -1.36        |
| CTNND1    | catenin (cadherin-associated protein, p120cas) | chr1q11              | morphogenesis of a polarized epithelium                              | ---                                  | -1.01         | -1.02           | 1.14      | 1.08        | 1.07      | 1.12        | -1.15      | -1.09        | -1.36      | -1.21        | -1.35      | -1.41        |
| CTNND2    | catenin (cadherin-associated protein, p120cas) | chr5p15.2            | morphogenesis of a branching structure                               | ---                                  | -1.79         | -1.28           | -1.30     | 1.07        | 1.09      | 1.14        | -1.73      | -1.04        | -1.69      | -1.18        | -1.71      | -1.49        |
| CTNS      | cystinosin, lysosomal cystine transporter      | chr17p13             | cellular amino acid metabolic process                                | ---                                  | -1.05         | -1.01           | 1.00      | 1.12        | 1.29      | 1.03        | 1.12       | 1.05         | -1.59      | -2.23        | -1.74      | -1.63        |
| CTNS      | cystinosin, lysosomal cystine transporter      | chr17p13             | cellular amino acid metabolic process                                | ---                                  | -1.05         | -1.05           | 1.07      | 1.01        | 1.05      | -1.01       | 1.03       | 1.08         | -1.83      | -1.94        | -1.75      | -1.70        |
| CTPS1     | CTP synthase 1                                 | chr1p34.1            | nucleobase-containing compound metabolism                            | ---                                  | -1.07         | -1.08           | -1.02     | 1.08        | -1.01     | -1.00       | -1.05      | 1.08         | -1.04      | -1.06        | -1.25      | -1.12        |
| CTPS2     | CTP synthase 2                                 | chrXp22              | pyrimidine nucleotide metabolic process                              | ---                                  | 1.08          | 1.03            | -1.03     | 1.13        | 1.08      | 1.03        | -1.07      | -1.06        | -1.47      | -1.27        | -1.45      | -1.32        |
| CTPS2     | CTP synthase 2                                 | chrXp22              | pyrimidine nucleotide metabolic process                              | ---                                  | 1.00          | 1.02            | -1.00     | 1.15        | -1.03     | -1.03       | 1.13       | 1.15         | -1.29      | -1.28        | -1.31      | -1.36        |
| CTR9      | Ctrl9, Paf1/RNA polymerase II holoenzyme       | chr11p15.3           | negative regulation of transcription from RNA polymerase II promoter | ---                                  | -1.08         | -1.00           | -1.03     | -1.07       | -1.01     | 1.03        | -1.19      | -1.03        | -1.52      | -1.15        | -1.33      | -1.28        |
| CTRL      | chymotrypsin-like                              | chr16q22.1           | proteolysis                                                          | ---                                  | -1.27         | -1.27           | 1.04      | -1.12       | 1.27      | -1.09       | 1.07       | -1.14        | 1.21       | 1.42         | 1.28       | 1.37         |
| CTSA      | cathepsin A                                    | chr20q13.1           | proteolysis                                                          | ---                                  | -1.23         | -1.18           | -1.01     | 1.12        | 1.01      | -1.15       | 1.26       | 1.15         | 1.11       | -1.08        | -1.16      | -1.03        |
| CTSB      | cathepsin B                                    | chr8p22              | toll-like receptor signaling pathway                                 | ---                                  | -1.04         | -1.04           | 1.00      | 1.09        | 1.06      | 1.01        | 1.13       | -1.01        | 1.21       | 1.11         | 1.21       | 1.49         |
| CTSB      | cathepsin B                                    | chr8p22              | toll-like receptor signaling pathway                                 | ---                                  | -1.05         | -1.08           | -1.03     | 1.02        | 1.03      | 1.01        | 1.09       | 1.17         | 1.09       | 1.16         | 1.12       | 1.33         |
| CTSB      | cathepsin B                                    | chr8p22              | toll-like receptor signaling pathway                                 | ---                                  | -1.05         | -1.05           | 1.00      | 1.12        | 1.00      | -1.02       | 1.16       | 1.08         | 1.28       | 1.15         | 1.16       | 1.26         |
| CTSC      | cathepsin C                                    | chr11q14.2           | T cell mediated cytotoxicity                                         | ---                                  | 1.01          | 1.01            | -1.02     | 1.00        | 1.04      | -1.07       | 1.01       | 1.02         | 1.11       | -1.08        | 1.37       | 1.27         |
| CTSC      | cathepsin C                                    | chr11q14.2           | T cell mediated cytotoxicity                                         | ---                                  | -1.05         | -1.04           | -1.01     | -1.02       | 1.05      | 1.03        | 1.02       | -1.09        | -1.03      | -1.06        | 1.38       | 1.33         |
| CTSD      | cathepsin D                                    | chr11p15.5           | autophagic vacuole assembly                                          | ---                                  | 1.02          | -1.03           | 1.06      | 1.13        | 1.05      | -1.04       | 1.31       | 1.23         | 1.29       | 1.23         | 1.33       | 1.49         |
| CTSF      | cathepsin F                                    | chr11q13             | proteolysis                                                          | ---                                  | -1.02         | -1.03           | 1.09      | 1.16        | 1.32      | 1.22        | 1.01       | 1.12         | -1.72      | -1.53        | -2.28      | -1.88        |
| CTSK      | cathepsin K                                    | chr1q21              | intramembranous ossification                                         | ---                                  | 2.24          | 1.26            | 1.07      | 1.25        | 2.64      | 4.45        | -1.80      | 1.03         | 1.76       | 2.05         | 5.53       | 6.70         |
| CTSL1     | cathepsin L1                                   | chr9q21.33           | toll-like receptor signaling pathway                                 | ---                                  | 1.07          | 1.08            | -1.07     | -1.19       | -1.06     | -1.02       | -1.11      | 1.01         | 1.19       | 1.23         | 1.63       | 1.39         |
| CTSL1P8   | cathepsin L1 pseudogene 8                      | chr9q22.1            | 0                                                                    | ---                                  | -1.26         | 1.02            | -1.27     | -1.21       | -1.13     | -1.25       | -1.05      | -1.09        | -1.12      | -1.14        | 1.19       | 1.12         |
| CTSO      | cathepsin O                                    | chr4q32.1            | proteolysis                                                          | ---                                  | -1.33         | -1.28           | -1.40     | -1.79       | 1.31      | 1.52        | -1.34      | 1.15         | -3.33      | -2.65        | 1.35       | -1.36        |
| CTSS      | cathepsin S                                    | chr1q21              | toll-like receptor signaling pathway                                 | ---                                  | -1.28         | -2.28           | -1.30     | -1.08       | 1.09      | -1.19       | -1.07      | -1.55        | 1.55       | 2.06         | 2.15       | 1.77         |
| CTSS      | cathepsin S                                    | chr1q21              | toll-like receptor signaling pathway                                 | ---                                  | -1.03         | 1.03            | 1.17      | 1.13        | -1.02     | 1.25        | 1.18       | 1.27         | 1.95       | 1.94         | 1.59       | 1.47         |
| CTSS      | cathepsin S                                    | chr1q21              | toll-like receptor signaling pathway                                 | ---                                  | -1.18         | -1.44           | 1.00      | 1.07        | 1.11      | 1.57        | 1.66       | 1.47         | 1.79       | 1.85         | 1.41       | 1.41         |
| CTTN      | cortactin                                      | chr11q13             | 0                                                                    | ---                                  | -1.18         | -1.15           | -1.20     | -1.20       | 1.10      | 1.04        | 1.21       | 1.13         | 3.48       | 2.55         | 3.25       | 3.04         |
| CTTN      | cortactin                                      | chr11q13             | 0                                                                    | ---                                  | 1.01          | -1.07           | -1.03     | -1.37       | 1.00      | -1.03       | 1.07       | 1.04         | 2.66       | 1.93         | 2.69       | 2.49         |
| CTTN      | cortactin                                      | chr11q13             | 0                                                                    | ---                                  | 1.10          | -1.07           | 1.05      | 1.06        | -1.00     | 1.03        | 1.06       | -1.03        | -1.34      | -1.25        | -2.15      | -2.12        |
| CTTNBP2   | cortactin binding protein 2                    | chr7q31              | brain development                                                    | ---                                  | 1.04          | 1.15            | 1.23      | 1.47        | 1.09      | 1.25        | -1.15      | 1.09         | -2.80      | -2.47        | -2.89      | -2.65        |
| CTTNBP2NL | CTTNBP2 N-terminal like                        | chr1p13.2            | 0                                                                    | ---                                  | -1.08         | -1.13           | -1.08     | -1.13       | -1.06     | 1.00        | 1.10       | 1.08         | -1.20      | -1.16        | -1.25      | -1.28        |
| CTU2      | cytosolic thouridylase subunit                 | chr16q24.3           | (tRNA wobble uridine modification)                                   | ---                                  | -2.19         | -1.65           | -1.12     | -1.88       | 1.00      | -1.54       | -1.78      | -3.74        | -2.99      | -3.23        | -1.81      | -3.21        |
| CTU2      | cytosolic thouridylase subunit                 | chr16q24.3           | (tRNA wobble uridine modification)                                   | ---                                  | 1.13          | 1.10            | -1.04     | 1.19        | -1.04     | -1.02       | 1.11       | -1.01        | 1.63       | 1.34         | 1.43       | 1.54         |
| CTXN1     | cortixin 1                                     | chr19p13.2           | 0                                                                    | ---                                  | 1.13          | -1.07           | -1.05     | -1.03       | -1.37     | -1.06       | 1.22       | 1.27         | 1.08       | 1.21         | -2.54      | -2.15        |
| CUL1      | cullin 1                                       | chr7q36.1            | G1                                                                   | ---                                  | 1.11          | 1.27            | 1.12      | -1.04       | 1.11      | -1.10       | -1.11      | -1.12        | 1.45       | 1.60         | 1.67       | 1.35         |
| CUL2      | cullin 2                                       | chr10p11.21          | G1                                                                   | ---                                  | 1.11          | 1.01            | -1.13     | -1.10       | -1.54     | 1.13        | -1.10      | 1.08         | -2.10      | -2.91        | -3.16      | -3.78        |
| CUL3      | cullin 3                                       | chr2q36.2            | G1                                                                   | ---                                  | 1.05          | 1.04            | -1.05     | 1.05        | -1.33     | -1.09       | -1.61      | -1.32        | -1.80      | -1.50        | -1.24      | -1.53        |
| CUL3      | cullin 3                                       | chr2q36.2            | G1                                                                   | ---                                  | 1.01          | 1.04            | 1.04      | 1.06        | 1.06      | 1.01        | -1.21      | -1.09        | 1.06       | 1.11         | 1.28       | 1.26         |
| CUL4A     | cullin 4A                                      | chr13q34             | G1                                                                   | ---                                  | 1.16          | -1.31           | -1.11     | 1.22        | 1.43      | 1.02        | 2.10       | 1.87         | 6.81       | 3.95         | 1.52       | -1.03        |
| CUL4A     | cullin 4A                                      | chr13q34             | G1                                                                   | ---                                  | 1.14          | 1.47            | 1.11      | 1.07        | 1.00      | 1.31        | 1.55       | -1.08        | -1.32      | -1.35        | -1.97      | -1.02        |
| CUL4B     | cullin 4B                                      | chrXq23              | DNA repair                                                           | ---                                  | 1.06          | 1.00            | 1.07      | 1.08        | -1.01     | 1.04        | 1.13       | 1.18         | 1.14       | 1.36         | 1.16       | 1.12         |
| CUL4B     | cullin 4B                                      | chrXq23              | DNA repair                                                           | ---                                  | -1.12         | -1.14           | 1.10      | 1.05        | -1.07     | -1.01       | 1.37       | 1.20         | 1.49       | 1.51         | 1.67       | 1.44         |
| CUL4B     | cullin 4B                                      | chrXq23              | DNA repair                                                           | ---                                  | -1.07         | 1.05            | -1.04     | -1.08       | -1.01     | 1.01        | -1.01      | -1.10        | -1.22      | -1.09        | -1.42      | -1.54        |
| CUL4B     | cullin 4B                                      | chrXq23              | DNA repair                                                           | ---                                  | 1.06          | 1.19            | 1.12      | 1.03        | 1.06      | -1.16       | 1.31       | 1.09         | 1.54       | 1.60         | 1.73       | 1.60         |
| CUL5      | cullin 5                                       | chr11q22.3           | G1                                                                   | ---                                  | 1.02          | 1.06            | 1.14      | 1.10        | -1.04     | -1.05       | 1.46       | 1.26         | 1.22       | 1.27         | 1.57       | 1.18         |
| CUL5      | cullin 5                                       | chr11q22.3           | G1                                                                   | ---                                  | 1.46          | 1.34            | -1.07     | 1.09        | -1.05     | -1.15       | -1.09      | 1.26         | -1.73      | -2.73        | -2.44      | -2.76        |
| CUL7      | cullin 7                                       | chr6p21.1            | vasculogenesis                                                       | ---                                  | -1.03         | -1.25           | -1.05     | 1.15        | 1.19      | 1.23        | 1.04       | 1.12         | 1.53       | 1.45         | 1.55       | 2.05         |
| CUL7      | cullin 7                                       | chr6p21.1            | vasculogenesis                                                       | ---                                  | 1.19          | -1.07           | 1.04      | 1.01        | 1.10      | 1.36        | 1.18       | 1.03         | 1.95       | 1.68         | 1.57       | 1.89         |
| CUL7      | cullin 7                                       | chr6p21.1            | vasculogenesis                                                       | ---                                  | 1.24          | 1.37            | -1.11     | -1.08       | -1.09     | 1.24        | 1.06       | -1.04        | 1.21       | 1.05         | 1.54       | 1.47         |
| CUL7      | cullin 7                                       | chr6p21.1            | vasculogenesis                                                       | ---                                  | 1.25          | 1.10            | 1.64      | -1.01       | 4.63      | 1.68        | 3.32       | 1.24         | 1.14       | -1.10        | 2.05       | 1.62         |
| CUTA      | cutA divalent cation transporter               | chr6p21.32           | protein localization                                                 | ---                                  | -1.08         | -1.03           | -1.01     | 1.00        | 1.01      | -1.08       | 1.10       | 1.03         | 1.29       | 1.09         | 1.04       | 1.12         |
| CUTC      | cutC copper transporter homolog                | chr10q24.2           | copper ion transport                                                 | ---                                  | -1.07         | -1.04           | -1.00     | 1.02        | 1.06      | 1.04        | -1.03      | 1.03         | 1.06       | 1.04         | 1.23       | 1.25         |
| CUX1      | cut-like homeobox 1                            | chr7q22.1            | negative regulation of transcription from RNA polymerase II promoter | ---                                  | -1.25         | -1.30           | 1.04      | -1.02       | 1.13      | 1.15        | -1.12      | -1.14        | -1.51      | -1.34        | -1.52      | -1.27        |
| CUX1      | cut-like homeobox 1                            | chr7q22.1            | negative regulation of transcription from RNA polymerase II promoter | ---                                  | -1.08         | -1.07           | 1.01      | -1.08       | -1.07     | -1.03       | -1.13      | -1.03        | -1.33      | -1.33        | -1.52      | -1.45        |



| ID        | Gene Title                                             | Chromosomal Location | 1st Gene Ontology Biological Process           | Pathway                                   | A2497 30 mins | A2497P' 30 mins | A2497 2 h | A2497P' 2 h | A2497 4 h | A2497P' 4 h | A2497 24 h | A2497P' 24 h | A2497 48 h | A2497P' 48 h | A2497 72 h | A2497P' 72 h |
|-----------|--------------------------------------------------------|----------------------|------------------------------------------------|-------------------------------------------|---------------|-----------------|-----------|-------------|-----------|-------------|------------|--------------|------------|--------------|------------|--------------|
| CYP19A1   | cytochrome P450, family 1                              | chr15q21.1           | steroid biosynthetic process                   | ---                                       | -1.11         | -1.14           | -3.61     | -1.20       | -1.38     | 1.32        | -1.85      | -1.18        | 2.49       | 1.15         | -1.20      | 1.21         |
| CYP1A1    | cytochrome P450, family 1                              | chr15q24.1           | response to hypoxia                            | ---                                       | 1.01          | -3.63           | -1.24     | -1.03       | 2.14      | 2.48        | -1.28      | 1.54         | 5.11       | 1.43         | 6.49       | 5.93         |
| CYP1B1    | cytochrome P450, family 1                              | chr2p22.2            | angiogenesis                                   | ---                                       | -1.01         | -1.12           | 1.10      | 1.14        | 1.32      | 1.21        | -1.24      | -1.03        | 1.01       | -1.27        | 1.85       | 1.29         |
| CYP1B1    | cytochrome P450, family 1                              | chr2p22.2            | angiogenesis                                   | ---                                       | 1.01          | 1.12            | -1.00     | -1.05       | 1.04      | 1.08        | -1.35      | -1.31        | 1.01       | -1.13        | 1.59       | 1.33         |
| CYP1B1    | cytochrome P450, family 1                              | chr2p22.2            | angiogenesis                                   | ---                                       | -1.04         | -1.03           | 1.20      | -1.11       | 1.11      | 1.12        | -1.64      | -1.38        | -1.52      | -1.36        | 1.35       | 1.17         |
| CYP20A1   | cytochrome P450, family 2                              | chr2q33.2            | oxidation-reduction process                    | ---                                       | 1.33          | 1.14            | 1.05      | 1.09        | -1.03     | 1.04        | -1.11      | 1.01         | -1.17      | -1.41        | -1.23      | -1.36        |
| CYP24A1   | cytochrome P450, family 2                              | chr20q13             | osteoblast differentiation                     | ---                                       | 1.03          | -1.28           | -1.28     | -1.20       | -1.17     | 1.32        | -1.42      | -1.50        | -1.81      | -2.77        | -6.31      | -5.53        |
| CYP26B1   | cytochrome P450, family 2                              | chr2p13.2            | cell fate determination                        | ---                                       | 1.25          | 1.22            | 1.60      | -1.20       | 1.02      | -1.45       | -1.01      | -1.12        | 1.99       | 1.60         | 1.32       | -1.85        |
| CYP27B1   | cytochrome P450, family 2                              | chr12q13.1-q13.3     | vitamin metabolic process                      | ---                                       | 1.19          | 1.24            | -1.12     | -1.09       | 1.01      | 1.23        | -1.06      | 1.07         | -1.12      | -1.26        | 1.60       | 1.24         |
| CYP27C1   | cytochrome P450, family 2                              | chr2q14.3            | oxidation-reduction process                    | ---                                       | -1.20         | -1.24           | -1.24     | -1.28       | 1.01      | 1.26        | 1.10       | 1.13         | -1.29      | -1.61        | -2.04      | -2.15        |
| CYP2E1    | cytochrome P450, family 2                              | chr10q26.3           | triglyceride metabolic process                 | ---                                       | 1.50          | 1.03            | -1.63     | 1.17        | -3.16     | -2.27       | 1.92       | 1.37         | 1.29       | 1.63         | 1.87       | 2.14         |
| CYP2U1    | cytochrome P450, family 2                              | chr4q25              | xenobiotic metabolic process                   | ---                                       | -1.00         | -1.10           | 1.10      | 1.10        | -1.23     | 1.27        | -1.07      | -1.19        | -2.69      | -2.38        | -1.92      | -2.28        |
| CYP2U1    | cytochrome P450, family 2                              | chr4q25              | xenobiotic metabolic process                   | ---                                       | 1.07          | 1.24            | 1.11      | 1.17        | 1.00      | 1.01        | -1.12      | 1.01         | -3.86      | -2.38        | -2.34      | -2.05        |
| CYP39A1   | cytochrome P450, family 3                              | chr6p21.1-p11.2      | lipid metabolic process                        | ---                                       | 1.02          | 1.22            | 1.03      | -1.12       | -1.74     | -1.20       | -1.18      | 1.06         | -1.66      | -2.28        | -1.51      | -1.55        |
| CYP3A4    | cytochrome P450, family 3                              | chr7q21.1            | lipid metabolic process                        | ---                                       | -1.32         | -1.66           | -1.17     | 1.17        | -1.01     | 1.08        | -1.66      | 1.00         | -2.15      | -2.29        | -2.58      | -2.14        |
| CYP3A43   | cytochrome P450, family 3                              | chr7q21.1            | xenobiotic metabolic process                   | Irinotecan_pathway_PharmGKB // GenMAF     | -1.50         | -1.02           | -1.30     | -1.08       | 1.81      | 2.64        | 3.16       | 3.72         | 2.29       | 1.18         | -1.43      | -1.12        |
| CYP4A11   | cytochrome P450, family 4                              | chr1p33              | long-chain fatty acid metabolic process        | ---                                       | 1.37          | 1.13            | 5.06      | 9.58        | 1.76      | -1.06       | 2.73       | 2.87         | 1.59       | -1.09        | 1.31       | 2.36         |
| CYP4F2    | cytochrome P450, family 4                              | chr19p13.12          | very long-chain fatty acid metabolic process   | ---                                       | 2.76          | 2.42            | -1.45     | -1.47       | 1.50      | 1.31        | 2.85       | 2.26         | 3.71       | -1.08        | 1.47       | 1.20         |
| CYP4V2    | cytochrome P450, family 4                              | chr4q35.2            | visual perception                              | ---                                       | -1.13         | 1.05            | -1.17     | -1.05       | 1.32      | -1.06       | 1.17       | 1.45         | -1.80      | -2.69        | -2.18      | -3.24        |
| CYP4V2    | cytochrome P450, family 4                              | chr4q35.2            | visual perception                              | ---                                       | -1.04         | -1.07           | 1.09      | -1.09       | 1.00      | -1.02       | -1.10      | 1.08         | -1.57      | -1.19        | -2.19      | -1.55        |
| CYP51A1   | cytochrome P450, family 5                              | chr7q21.2            | lipid metabolic process                        | Cholesterol_Biosynthesis // GenMAPP       | 1.05          | 1.04            | -1.08     | -1.03       | -1.12     | 1.08        | -1.21      | 1.03         | 1.21       | 1.08         | 1.17       | 1.17         |
| CYP51A1   | cytochrome P450, family 5                              | chr7q21.2            | lipid metabolic process                        | Cholesterol_Biosynthesis // GenMAPP       | -1.07         | -1.03           | -1.04     | 1.04        | 1.06      | -1.00       | 1.09       | -1.06        | 2.48       | 2.14         | 4.28       | 3.68         |
| CYR61     | cysteine-rich, angiogenic inhibitor                    | chr1p22.3            | regulation of cell growth                      | Hypertrophy_model // GenMAPP              | 1.34          | 1.25            | -1.23     | -1.01       | 1.18      | 1.04        | 1.79       | 1.19         | 3.85       | 2.09         | 9.73       | 6.77         |
| CYR61     | cysteine-rich, angiogenic inhibitor                    | chr1p22.3            | regulation of cell growth                      | Hypertrophy_model // GenMAPP              | 1.29          | 1.30            | 1.06      | 1.13        | 1.24      | -1.00       | 1.83       | 1.17         | 3.97       | 1.95         | 14.42      | 9.02         |
| CYSLTR1   | cysteinyl leukotriene receptor                         | chrXq13.2-q21.1      | calcium ion transport                          | GPCRDB_Class_A_Rhodopsin-like2 // GenMAPP | 1.50          | -1.10           | 1.14      | 1.77        | -1.61     | 1.40        | -1.11      | -1.01        | 1.11       | -6.82        | 1.78       | 1.19         |
| CYSTM1    | cysteine-rich transmembrane protein                    | chr5q31.3            | 0                                              | ---                                       | -1.01         | 1.06            | -1.11     | -1.09       | 1.15      | -1.00       | -1.09      | -1.27        | 1.31       | 1.17         | 1.26       | 1.05         |
| CYTH2     | cytohesin 2                                            | chr19q13.33          | endocytosis                                    | ---                                       | 1.16          | 1.03            | 1.09      | 1.22        | -1.20     | -1.02       | -1.06      | 1.03         | -1.49      | -1.59        | -1.25      | -1.01        |
| D2HGDH    | D-2-hydroxyglutarate dehydrogenase                     | chr2q37.3            | 2-oxoglutarate metabolic process               | ---                                       | 1.27          | -1.37           | 1.11      | 1.31        | -1.06     | -1.06       | 1.39       | 1.35         | 1.00       | 1.12         | -1.49      | 1.11         |
| DAB1      | Dab, reelin signal transducer                          | chr1p32-p31          | neuron migration                               | ---                                       | -1.25         | -1.31           | -1.04     | 1.15        | 1.02      | 1.07        | 1.17       | -1.02        | -1.73      | -1.53        | -2.18      | -3.34        |
| DAB1      | Dab, reelin signal transducer                          | chr1p32-p31          | neuron migration                               | ---                                       | 1.10          | 1.15            | 1.06      | 1.03        | -1.01     | 1.02        | -1.06      | -1.04        | -1.89      | -1.66        | -2.86      | -2.78        |
| DAB1      | Dab, reelin signal transducer                          | chr1p32-p31          | neuron migration                               | ---                                       | 1.20          | 1.15            | 1.01      | 1.03        | -1.14     | -1.01       | -1.06      | 1.31         | -1.19      | -1.25        | -1.35      | -1.34        |
| DAB2      | Dab, mitogen-responsive protein                        | chr5p13              | cell morphogenesis involved in differentiation | ---                                       | 1.01          | 1.00            | -1.05     | -1.17       | -1.12     | 1.01        | -1.45      | -1.34        | -8.06      | -5.20        | -10.79     | -8.78        |
| DAB2      | Dab, mitogen-responsive protein                        | chr5p13              | cell morphogenesis involved in differentiation | ---                                       | 1.04          | -1.02           | 1.01      | 1.01        | 1.05      | 1.06        | -1.07      | -1.16        | -4.01      | -3.84        | -3.23      | -3.05        |
| DAB2      | Dab, mitogen-responsive protein                        | chr5p13              | cell morphogenesis involved in differentiation | ---                                       | 1.12          | -1.03           | 1.25      | 1.28        | -1.15     | -1.04       | -1.22      | 1.13         | -1.77      | -1.86        | -1.94      | -1.51        |
| DAB2      | Dab, mitogen-responsive protein                        | chr5p13              | cell morphogenesis involved in differentiation | ---                                       | 1.16          | 1.10            | 1.19      | 1.28        | -1.05     | 1.09        | -1.28      | -6.26        | -4.97      | -45.03       | -10.07     | -10.07       |
| DAB2      | Dab, mitogen-responsive protein                        | chr5p13              | cell morphogenesis involved in differentiation | ---                                       | 1.01          | 1.04            | -1.06     | -1.07       | -1.08     | -1.03       | -1.19      | -1.12        | -3.79      | -3.23        | -5.09      | -5.01        |
| DAB2      | Dab, mitogen-responsive protein                        | chr5p13              | cell morphogenesis involved in differentiation | ---                                       | 1.13          | -1.00           | -1.14     | -1.07       | -1.02     | 1.03        | -1.13      | -1.15        | -4.13      | -3.73        | -4.44      | -4.40        |
| DAB2IP    | DAB2 interacting protein                               | chr9q33.1-q33.3      | negative regulation of transcription from DNA  | ---                                       | -1.09         | -1.23           | -1.04     | -1.08       | 1.12      | 1.01        | 1.05       | 1.06         | -1.22      | -1.21        | -1.12      | -1.09        |
| DACH2     | dachshund homolog 2 (Drosophila)                       | chrXq21.3            | transcription, DNA-dependent                   | ---                                       | -1.02         | 1.04            | 1.54      | 2.09        | -1.14     | 1.05        | -1.28      | 1.34         | 1.49       | -3.13        | 1.89       | 2.00         |
| DACT2     | dishevelled-binding antagonist                         | chr6q27              | epithelial cell morphogenesis                  | ---                                       | -1.32         | -2.25           | 1.43      | 2.31        | 1.21      | -1.13       | -1.49      | 2.11         | -1.36      | -2.09        | -2.07      | -1.90        |
| DAD1      | defender against cell death                            | chr14q11.2           | blastocyst development                         | ---                                       | 1.02          | -1.01           | -1.01     | 1.03        | 1.06      | 1.08        | -1.09      | -1.21        | 1.17       | 1.09         | 1.46       | 1.44         |
| DAGLB     | diacylglycerol lipase, beta                            | chr7p22.1            | lipid metabolic process                        | ---                                       | -1.46         | -1.26           | 1.17      | -1.11       | 1.83      | 1.90        | -1.05      | 1.22         | 1.12       | 1.08         | 1.26       | 1.86         |
| DAGLB     | diacylglycerol lipase, beta                            | chr7p22.1            | lipid metabolic process                        | ---                                       | -1.09         | -1.10           | 1.13      | 1.28        | 1.07      | -1.10       | -1.03      | -1.06        | 1.28       | 1.24         | 1.36       | 1.55         |
| DAGLB     | diacylglycerol lipase, beta                            | chr7p22.1            | lipid metabolic process                        | ---                                       | -1.10         | -1.08           | 1.04      | 1.01        | -1.15     | -1.15       | 1.07       | 1.29         | 1.30       | 1.22         | 1.40       | 1.66         |
| DAGLB     | diacylglycerol lipase, beta                            | chr7p22.1            | lipid metabolic process                        | ---                                       | 1.04          | 1.15            | -1.08     | 1.01        | -1.11     | -1.17       | 1.06       | 1.11         | 1.41       | 1.22         | 1.50       | 1.66         |
| DAK       | dihydroxyacetone kinase 2                              | chr11q12.2           | glycerol metabolic process                     | ---                                       | -1.38         | -1.51           | -1.12     | 1.01        | -1.06     | -1.14       | -1.07      | 1.14         | 1.29       | 1.23         | 1.11       | 1.52         |
| DALRD3    | DALR anticodon binding domain                          | chr3p21.31           | tRNA aminoacylation for protein translation    | ---                                       | 1.08          | -1.01           | 1.09      | 1.24        | -1.06     | 1.04        | -1.02      | 1.06         | 1.08       | 1.14         | -1.22      | 1.02         |
| DALRD3    | DALR anticodon binding domain                          | chr3p21.31           | tRNA aminoacylation for protein translation    | ---                                       | 1.02          | -1.17           | -1.11     | -1.09       | -1.14     | -1.35       | 1.46       | 1.56         | 1.00       | 1.01         | 1.33       | 1.33         |
| DANCR     | differentiation antagonizing factor                    | chr4q12              | 0                                              | ---                                       | -1.07         | -1.11           | -1.03     | 1.02        | 1.06      | 1.02        | -1.06      | -1.12        | -1.14      | -1.27        | -1.65      | -1.51        |
| DAND5     | DAN domain family member                               | chr19p13.2           | determination of left                          | ---                                       | -1.10         | -1.33           | 1.02      | 1.20        | -1.04     | 1.52        | 1.06       | 1.11         | -1.92      | -1.76        | -2.20      | -1.83        |
| DAP       | death-associated protein                               | chr5p15.2            | autophagy                                      | ---                                       | 1.03          | 1.02            | -1.02     | -1.02       | 1.03      | 1.04        | 1.06       | -1.06        | 1.17       | 1.10         | 1.17       | 1.20         |
| DAP3      | death associated protein 3                             | chr1q22              | apoptotic process                              | ---                                       | -1.24         | -1.42           | 1.08      | 1.23        | -1.15     | -1.07       | -1.17      | -1.06        | 1.17       | -1.06        | 1.13       | 1.48         |
| DAP3      | death associated protein 3                             | chr1q22              | apoptotic process                              | ---                                       | 1.01          | -1.02           | 1.00      | -1.03       | -1.01     | -1.05       | 1.15       | 1.00         | 1.29       | 1.16         | 1.18       | 1.19         |
| DAPK1     | death-associated protein kinase                        | chr9q21.33           | regulation of translation                      | ---                                       | 1.22          | 1.23            | 1.01      | -1.14       | -1.04     | 1.07        | -1.19      | -1.05        | -1.66      | -1.59        | -1.23      | -1.63        |
| DAPK1-IT1 | DAPK1 intronic transcript                              | ---                  | 0                                              | ---                                       | 1.96          | 1.08            | 1.05      | -1.05       | -1.09     | 1.40        | -1.09      | 1.24         | -5.84      | -3.19        | -2.44      | -2.67        |
| DAPK2     | death-associated protein kinase                        | chr15q22.31          | protein phosphorylation                        | ---                                       | 1.03          | 1.15            | -1.12     | -1.35       | 1.06      | 1.10        | 1.04       | 1.30         | -1.26      | 1.17         | -1.37      | -1.04        |
| DAPK3     | death-associated protein kinase                        | chr19p13.3           | cytokinesis                                    | ---                                       | 1.24          | 1.09            | 1.16      | 1.16        | -1.08     | -1.02       | 1.44       | 1.27         | 1.53       | 1.23         | 1.26       | 1.38         |
| DAPL1     | death associated protein-like                          | chr2q24.1            | apoptotic process                              | ---                                       | 1.87          | 2.46            | 1.12      | 1.40        | 1.42      | -1.67       | -1.16      | 1.05         | -2.37      | -1.67        | -6.60      | -4.44        |
| DARS      | aspartyl-tRNA synthetase                               | chr2q21.3            | translation                                    | ---                                       | -1.00         | -1.07           | -1.04     | -1.01       | -1.00     | 1.03        | 1.01       | 1.02         | 1.03       | 1.09         | 1.03       | 1.16         |
| DARS2     | aspartyl-tRNA synthetase                               | chr1q25.1            | translation                                    | ---                                       | -1.07         | -1.08           | -1.02     | 1.06        | 1.07      | -1.05       | -1.01      | -1.08        | -1.93      | -1.84        | -2.13      | -1.68        |
| DAW1      | dynein assembly factor with microtubule-binding domain | chr2q36.3            | 0                                              | ---                                       | 1.92          | 2.43            | -1.71     | -1.47       | 2.49      | 1.58        | 1.18       | 3.31         | -1.05      | -1.31        | 1.66       | 1.03         |
| DAXX      | death-domain associated protein                        | chr6p21.3            | mitotic cytokinesis                            | Apoptosis_KEGG // GenMAPP                 | -1.11         | 1.06            | -1.21     | -1.13       | -1.53     | -1.05       | -1.17      | -1.10        | 1.35       | 1.40         | -1.03      | 1.01         |
| DAXX      | death-domain associated protein                        | chr6p21.3            | mitotic cytokinesis                            | Apoptosis_KEGG // GenMAPP                 | -1.11         | -1.01           | 1.09      | 1.01        | 1.09      | -1.07       | 1.24       | 1.15         | 1.50       | 1.26         | 1.12       | 1.14         |
| DAZAP1    | DAZ associated protein 1                               | chr19p13.3           | maternal placenta development                  | ---                                       | 1.11          | 1.03            | 1.07      | 1.18        | -1.11     | -1.27       | 1.05       | 1.03         | 1.24       | 1.02         | -1.13      | -1.14        |
| DAZAP2    | DAZ associated protein 2                               | chr12q12             | 0                                              | Circadian_Exercise // GenMAPP             | 1.11          | 1.22            | -1.18     | -1.14       | 1.18      | 1.15        | -1.14      | -1.06        | 1.23       | 1.06         | 1.40       | 1.27         |
| DBCC1     | deleted in bladder cancer 1                            | chr9q32-q33          | cell cycle                                     | ---                                       | 2.39          | 1.33            | -3.10     | -2.96       | -2.29     | 1.36        | -1.43      | -1.18        | 5.30       | 10.31        | 2.16       | 2.11         |









| ID           | Gene Title                  | Chromosomal Location | 1st Gene Ontology Biological Process       | Pathway                                 | A2497 30 mins | A2497P' 30 mins | A2497 2 h | A2497P' 2 h | A2497 4 h | A2497P' 4 h | A2497 24 h | A2497P' 24 h | A2497 48 h | A2497P' 48 h | A2497 72 h | A2497P' 72 h |
|--------------|-----------------------------|----------------------|--------------------------------------------|-----------------------------------------|---------------|-----------------|-----------|-------------|-----------|-------------|------------|--------------|------------|--------------|------------|--------------|
| DIO2         | deiodinase, iodothyronine,  | chr14q24.2-q24.3     | selenocysteine incorporation               | ---                                     | -1.05         | 1.05            | 1.11      | 1.01        | 1.47      | 1.40        | -1.12      | -1.24        | -2.55      | -2.18        | -1.88      | -1.96        |
| DIO2         | deiodinase, iodothyronine,  | chr14q24.2-q24.3     | selenocysteine incorporation               | ---                                     | -1.09         | -1.07           | -1.02     | -1.03       | -1.06     | -1.08       | -1.26      | -1.12        | -1.70      | -1.56        | -1.56      | -1.53        |
| DIP2A        | DIP2 disco-interacting prot | chr21q22.3           | multicellular organismal development       | ---                                     | -1.07         | -1.12           | 1.11      | 1.25        | 1.07      | 1.19        | -1.03      | -1.06        | -2.08      | -1.83        | -1.51      | -1.33        |
| DIP2A        | DIP2 disco-interacting prot | chr21q22.3           | multicellular organismal development       | ---                                     | -1.34         | -1.60           | 1.12      | 1.21        | -2.55     | -1.49       | -1.14      | -1.53        | 2.24       | 2.02         | 2.15       | 2.59         |
| DIP2A        | DIP2 disco-interacting prot | chr21q22.3           | multicellular organismal development       | ---                                     | 1.13          | -1.03           | -1.01     | 1.10        | -1.00     | -1.22       | 1.26       | 1.32         | 1.70       | 1.41         | 1.84       | 1.69         |
| DIP2A        | DIP2 disco-interacting prot | chr21q22.3           | multicellular organismal development       | ---                                     | 1.06          | -1.08           | 1.14      | 1.21        | -1.11     | -1.21       | 1.39       | 1.39         | 1.68       | 1.42         | 1.69       | 1.62         |
| DIP2A        | DIP2 disco-interacting prot | chr21q22.3           | multicellular organismal development       | ---                                     | -1.05         | -1.15           | -1.14     | 1.28        | 1.75      | 1.59        | 1.29       | 1.65         | 1.32       | 1.15         | 1.57       | 1.72         |
| DIP2A        | DIP2 disco-interacting prot | chr21q22.3           | multicellular organismal development       | ---                                     | -2.67         | -1.15           | 1.19      | 1.60        | -1.55     | 1.10        | -1.14      | 1.06         | 2.77       | 3.14         | 2.12       | 2.81         |
| DIP2C        | DIP2 disco-interacting prot | chr10p15.3           | metabolic process                          | ---                                     | 1.13          | 1.04            | -1.08     | 1.02        | 1.07      | 1.09        | -1.12      | -1.10        | -1.59      | -1.37        | -1.49      | -1.42        |
| DIP2C        | DIP2 disco-interacting prot | chr10p15.3           | metabolic process                          | ---                                     | -1.34         | -1.15           | 1.04      | 1.05        | 1.14      | 1.05        | 1.06       | -1.08        | -1.51      | -1.38        | -1.02      | -1.00        |
| DIRAS3       | DIRAS family, GTP-binding   | chr1p31              | regulation of cyclin-dependent protein se  | ---                                     | -1.06         | -1.15           | -1.03     | -1.05       | 1.13      | -1.04       | -1.17      | -1.30        | 1.51       | 1.62         | -1.03      | -1.30        |
| DIRC2        | disrupted in renal carcinom | chr3q21.1            | transport                                  | ---                                     | -1.12         | -1.14           | 1.07      | 1.04        | -1.11     | -1.04       | -1.12      | 1.03         | -1.50      | -1.39        | -1.67      | -1.74        |
| DIRC3        | disrupted in renal carcinom | chr2q35              | 0                                          | ---                                     | 5.00          | 7.12            | 1.54      | 1.43        | 5.44      | -1.27       | 1.03       | 1.13         | 1.76       | 2.44         | 9.30       | 8.43         |
| DIS3         | DIS3 mitotic control homolo | chr13q22.1           | nuclear-transcribed mRNA catabolic pro     | ---                                     | -1.08         | -1.04           | 1.13      | 1.12        | 1.24      | 1.24        | -1.22      | -1.04        | 1.17       | 1.01         | 1.43       | 1.43         |
| DIS3L        | DIS3 mitotic control homolo | chr15q22.31          | rRNA catabolic process                     | ---                                     | -1.09         | -1.15           | 1.05      | 1.13        | 1.02      | -1.03       | -1.00      | 1.11         | -1.64      | -1.51        | -1.57      | -1.37        |
| DIS3L2       | DIS3 mitotic control homolo | chr2q37.1            | nuclear-transcribed mRNA catabolic pro     | ---                                     | 1.01          | -1.22           | -1.08     | -1.14       | 1.13      | 1.15        | 1.20       | 1.31         | -1.66      | -2.41        | -3.23      | -1.40        |
| DIS3L2       | DIS3 mitotic control homolo | chr2q37.1            | nuclear-transcribed mRNA catabolic pro     | ---                                     | 1.12          | -1.11           | -1.17     | -1.11       | -1.00     | -1.00       | 1.40       | -1.04        | 2.18       | 1.79         | 2.20       | 2.32         |
| DIS3L2       | DIS3 mitotic control homolo | chr2q37.1            | nuclear-transcribed mRNA catabolic pro     | ---                                     | -1.01         | -1.21           | -1.10     | -1.15       | -1.01     | 1.14        | 1.31       | 1.09         | 1.05       | -1.09        | -1.57      | -1.23        |
| DIS3L2       | DIS3 mitotic control homolo | chr2q37.1            | nuclear-transcribed mRNA catabolic pro     | ---                                     | 2.03          | 1.53            | 1.10      | -1.12       | 1.21      | 1.15        | -1.27      | -1.29        | -3.84      | -3.60        | -3.06      | -2.46        |
| DISC1 /// TS | disrupted in schizophrenia, | chr14q2.1            | microtubule cytoskeleton organization      | ---                                     | 1.75          | 1.33            | 1.41      | -1.29       | 1.05      | -1.25       | -1.07      | 1.26         | -1.58      | -1.91        | 1.58       | 1.25         |
| DISP1        | dispatched homolog 1 (Dro   | chr1q41              | smoothed signaling pathway                 | ---                                     | -1.13         | -1.11           | -1.01     | 1.04        | 1.05      | -1.07       | 1.13       | -1.03        | -1.47      | -1.58        | -1.94      | -2.07        |
| DKFZP434C    | DKFZP434C153 protein //     | chr14q2.13           | protein phosphorylation                    | ---                                     | 2.67          | 2.89            | 1.20      | 1.01        | 1.33      | 1.82        | -1.84      | -1.34        | -1.32      | -2.58        | -2.55      | -1.55        |
| DKFZP434J0   | uncharacterized protein DK  | chr4q31.23           | 0                                          | ---                                     | 1.18          | 1.16            | 1.23      | 1.35        | 1.17      | 1.20        | -1.33      | -1.09        | -2.32      | -1.48        | -1.63      | -1.44        |
| DKFZP434J0   | uncharacterized LOC93429    | chr19q13.32          | 0                                          | ---                                     | -1.22         | -1.11           | -1.12     | -1.12       | -1.20     | -1.23       | -1.15      | 1.30         | -1.89      | -2.67        | -1.62      | -1.84        |
| DKFZP434L    | uncharacterized LOC26082    | chr15q13.2           | 0                                          | ---                                     | 7.88          | 9.45            | 1.71      | 1.25        | -1.62     | -1.61       | 2.91       | 2.37         | -1.03      | -1.82        | 1.08       | 1.80         |
| DKFZp451A    | uncharacterized LOC40016    | chr13q34             | 0                                          | ---                                     | 1.19          | 1.31            | 1.01      | -1.12       | -1.06     | -1.17       | -1.19      | -1.08        | 1.43       | 1.37         | 1.62       | 2.60         |
| DKFZp451A    | uncharacterized LOC40016    | chr13q34             | 0                                          | ---                                     | 1.18          | -1.03           | -1.13     | -1.04       | -1.17     | -1.28       | 1.27       | 1.18         | 1.95       | 2.29         | 1.37       | 1.62         |
| DKFZP586I1   | uncharacterized protein DK  | chr7p14.3            | 0                                          | ---                                     | -1.09         | -1.07           | -1.05     | 1.12        | 1.05      | 1.01        | -1.04      | 1.00         | -1.63      | -1.44        | -1.93      | -1.29        |
| DKFZp667F9   | uncharacterized protein DK  | chr10p15.1           | 0                                          | ---                                     | -1.29         | -1.29           | 3.56      | 2.94        | 10.39     | 4.22        | 1.06       | 1.59         | 2.37       | 3.79         | 1.99       | 2.35         |
| DKK1         | dickkopf WNT signaling p    | chr10q11.2           | negative regulation of transcription from  | ---                                     | 1.03          | 1.09            | -1.12     | -1.27       | -1.03     | 1.05        | -1.04      | -1.04        | 1.76       | 1.58         | 2.22       | 1.91         |
| DKK3         | dickkopf WNT signaling p    | chr11p15.2           | multicellular organismal development       | ---                                     | 1.28          | 1.28            | -1.02     | -1.12       | 1.09      | -1.01       | 1.18       | 1.36         | 1.24       | 1.16         | 1.66       | 2.13         |
| DKK3         | dickkopf WNT signaling p    | chr11p15.2           | multicellular organismal development       | ---                                     | -1.10         | -1.07           | 1.08      | -1.04       | -1.14     | -1.50       | 1.73       | 1.11         | 1.55       | 2.04         | -1.08      | -1.16        |
| DKK3         | dickkopf WNT signaling p    | chr11p15.2           | multicellular organismal development       | ---                                     | -1.11         | -1.03           | -1.01     | -1.21       | -1.13     | -1.04       | 1.13       | 1.16         | 1.20       | 1.21         | 1.28       | 1.28         |
| DKK3         | dickkopf WNT signaling p    | chr11p15.2           | multicellular organismal development       | ---                                     | 1.20          | 1.08            | 1.09      | 1.05        | 1.05      | -1.08       | 1.29       | 1.19         | 1.22       | 1.16         | 1.30       | 1.51         |
| DKK3         | dickkopf WNT signaling p    | chr11p15.2           | multicellular organismal development       | ---                                     | -1.67         | -1.10           | 2.38      | 2.72        | 1.69      | 1.41        | -2.29      | -1.67        | 2.31       | 2.04         | -1.44      | -1.20        |
| DLAT         | dihydropyrimidine S-acetyl  | chr11q23.1           | carbohydrate metabolic process             | Glycolysis_and_Gluconeogenesis // GenMA | -1.01         | 1.06            | 1.02      | 1.08        | -1.03     | -1.05       | -1.15      | 1.04         | -1.63      | -1.16        | -1.27      | -1.22        |
| DLAT         | dihydropyrimidine S-acetyl  | chr11q23.1           | carbohydrate metabolic process             | Glycolysis_and_Gluconeogenesis // GenMA | -1.01         | -1.10           | 1.03      | 1.08        | 1.02      | 1.06        | -1.01      | -1.02        | 1.43       | 1.44         | 1.47       | 1.51         |
| DLC1         | deleted in liver cancer 1   | chr8p22              | neural tube closure                        | ---                                     | 2.24          | 1.81            | 1.02      | -2.25       | -1.80     | -1.75       | -1.03      | 1.93         | 2.98       | 4.55         | -1.16      | -1.10        |
| DLD          | dihydropyrimidine dehydro   | chr7q31-q32          | acetyl-CoA biosynthetic process from py    | Glycolysis_and_Gluconeogenesis // GenMA | 1.08          | -1.05           | 1.05      | 1.17        | 1.26      | 1.32        | -1.30      | -1.10        | -1.55      | -1.28        | -2.03      | -1.77        |
| DLD          | dihydropyrimidine dehydro   | chr7q31-q32          | acetyl-CoA biosynthetic process from py    | Glycolysis_and_Gluconeogenesis // GenMA | 1.03          | 1.11            | -1.10     | -1.11       | 1.06      | -1.05       | 1.08       | -1.02        | -1.45      | -1.37        | -1.26      | -1.41        |
| DLEU1        | deleted in lymphocytic leuk | chr13q14.3           | 0                                          | ---                                     | -1.03         | 1.06            | 1.05      | -1.01       | 1.05      | -1.03       | -1.19      | -1.02        | 1.08       | -1.02        | 1.37       | 1.35         |
| DLEU2        | deleted in lymphocytic leuk | chr13q14.3           | 0                                          | ---                                     | 1.50          | 1.31            | -1.10     | -1.23       | -1.27     | 1.04        | 1.08       | -1.20        | -1.93      | -1.72        | -1.74      | -1.41        |
| DLEU2        | deleted in lymphocytic leuk | chr13q14.3           | 0                                          | ---                                     | -1.08         | -1.05           | 1.25      | 1.13        | 1.63      | 1.56        | 1.17       | 1.32         | 1.78       | 1.33         | 1.79       | 1.91         |
| DLEU2        | deleted in lymphocytic leuk | chr13q14.3           | 0                                          | ---                                     | 1.27          | -1.08           | 1.10      | 1.02        | -1.01     | 1.25        | -1.27      | -1.24        | -2.35      | -1.61        | -2.18      | -2.16        |
| DLG1         | discs, large homolog 1 (Dro | chr3q29              | ureteric bud development                   | ---                                     | 1.13          | 1.12            | 1.19      | 1.15        | -1.05     | -1.27       | -1.12      | 1.06         | -1.04      | -1.02        | 1.51       | -1.06        |
| DLG1         | discs, large homolog 1 (Dro | chr3q29              | branching involved in ureteric bud morph   | ---                                     | 1.43          | 1.73            | 1.09      | -1.41       | 1.28      | 1.39        | -1.42      | -1.59        | -2.35      | -2.22        | -1.51      | -1.68        |
| DLG1-AS1     | DLG1 antisense RNA 1        | ---                  | 0                                          | ---                                     | -1.55         | -1.72           | 1.36      | 1.28        | 1.06      | -1.12       | -1.51      | 1.01         | -8.25      | -1.26        | -1.55      | -2.32        |
| DLG2         | discs, large homolog 2 (Dro | chr11q14.1           | synaptic transmission                      | ---                                     | -1.08         | -1.12           | 1.06      | 1.16        | 1.19      | 1.11        | 1.11       | -1.06        | 1.47       | 1.77         | 1.89       | 1.90         |
| DLG2         | discs, large homolog 2 (Dro | chr11q14.1           | synaptic transmission                      | ---                                     | -1.16         | -1.07           | 1.12      | 1.24        | 1.51      | 1.23        | 1.08       | -1.02        | 1.55       | 1.31         | 1.62       | 1.72         |
| DLG3         | discs, large homolog 3 (Dro | chrXq13.1            | establishment of planar polarity           | ---                                     | -1.03         | -1.10           | -1.02     | -1.00       | 1.03      | -1.04       | 1.25       | 1.16         | -1.58      | -1.59        | -1.48      | -1.43        |
| DLG3         | discs, large homolog 3 (Dro | chrXq13.1            | establishment of planar polarity           | ---                                     | -1.15         | -1.19           | -1.02     | -1.09       | 1.08      | 1.05        | 1.02       | 1.14         | -1.24      | -1.09        | -1.13      | -1.05        |
| DLG4         | discs, large homolog 4 (Dro | chr17p13.1           | adenosine receptor signaling pathway       | ---                                     | -1.69         | -1.30           | 1.16      | -1.10       | 1.15      | 1.25        | 1.72       | 1.06         | 1.26       | 1.25         | 1.35       | 1.33         |
| DLG5         | discs, large homolog 5 (Dro | chr10q23             | signal transduction                        | ---                                     | 1.04          | -1.02           | 1.02      | 1.07        | -1.01     | 1.07        | -1.04      | -1.12        | -1.36      | -1.25        | -1.52      | -1.50        |
| DLGAP1       | discs, large (Drosophila) h | chr18p11.31          | cell-cell signaling                        | ---                                     | 1.27          | 1.08            | 1.78      | 1.72        | 1.43      | 1.24        | -1.17      | 1.86         | -1.28      | 1.34         | 1.04       | 1.23         |
| DLGAP4       | discs, large (Drosophila) h | chr20q11.23          | cell-cell signaling                        | ---                                     | -1.35         | -1.26           | 1.18      | 1.05        | 1.15      | 1.15        | -1.20      | -1.15        | 1.26       | 1.28         | 1.31       | 1.56         |
| DLGAP4       | discs, large (Drosophila) h | chr20q11.23          | cell-cell signaling                        | ---                                     | -1.19         | -1.30           | 1.07      | 1.24        | 1.29      | 1.11        | 1.67       | 1.24         | 3.12       | 1.69         | 2.98       | 2.73         |
| DLGAP4       | discs, large (Drosophila) h | chr20q11.23          | cell-cell signaling                        | ---                                     | -1.05         | -1.23           | -1.09     | -1.17       | -1.08     | 1.14        | -1.08      | 1.04         | 1.11       | 1.41         | 1.29       | 1.39         |
| DLGAP5       | discs, large (Drosophila) h | chr14q22.3           | M phase of mitotic cell cycle              | ---                                     | 1.12          | 1.15            | -1.03     | -1.01       | -1.10     | -1.03       | -1.26      | -1.11        | 1.12       | 1.07         | 1.54       | 1.31         |
| DLL1         | delta-like 1 (Drosophila)   | chr6q27              | cell fate determination                    | ---                                     | 2.32          | 1.90            | 2.75      | -1.07       | -1.01     | -1.18       | -1.05      | 1.18         | 2.18       | 1.91         | 1.20       | -1.24        |
| DLST         | dihydropyrimidine S-succin  | chr14q24.3           | acetyl-CoA biosynthetic process            | Krebs-TCA_Cycle // GenMAPP              | -1.04         | -1.10           | -1.01     | 1.06        | -1.01     | 1.02        | 1.21       | 1.17         | 1.27       | 1.09         | 1.18       | 1.34         |
| DLX1         | distal-less homeobox 1      | chr2q32              | negative regulation of transcription from  | ---                                     | -1.02         | -1.02           | 1.11      | 1.16        | 1.04      | -1.05       | -1.54      | -1.39        | -1.90      | -2.82        | -2.31      | -2.28        |
| DLX2         | distal-less homeobox 2      | chr2q32              | negative regulation of transcription from  | ---                                     | 1.04          | 1.17            | -1.20     | -1.18       | 1.06      | -1.00       | -1.24      | -1.19        | -2.34      | -2.62        | -1.69      | -2.64        |
| DLX4         | distal-less homeobox 4      | chr17q21.33          | regulation of transcription, DNA-depend    | ---                                     | 1.02          | -1.03           | 1.19      | 1.22        | -1.13     | 1.03        | -1.07      | -1.19        | -1.54      | -1.49        | -1.08      | -1.28        |
| DMBT1        | deleted in malignant brain  | chr10q26.13          | blastocyst development                     | ---                                     | -1.27         | -1.29           | -1.00     | 1.42        | -1.25     | -1.23       | 1.20       | 1.03         | 4.91       | 2.81         | 1.85       | 2.19         |
| DMC1         | DNA meiotic recombinase     | chr22q13.1           | pachytene                                  | Ovarian_Infertility_Genes // GenMAPP    | 1.51          | 1.36            | 1.03      | -1.08       | -1.25     | -1.18       | -1.33      | -1.19        | -2.43      | -1.30        | -1.26      | -2.03        |
| DMD          | dystrophin                  | chrXp21.2            | positive regulation of cell-matrix adhesio | Striated_muscle_contraction // GenMAPP  | 1.39          | 1.20            | 1.28      | 1.41        | 1.29      | -1.03       | 1.25       | -1.06        | 1.60       | -1.30        | -1.31      | -1.06        |













| ID              | Gene Title                        | Chromosomal Location | 1st Gene Ontology Biological Process           | Pathway                                  | A2497 30 mins | A2497P' 30 mins | A2497 2 h | A2497P' 2 h | A2497 4 h | A2497P' 4 h | A2497 24 h | A2497P' 24 h | A2497 48 h | A2497P' 48 h | A2497 72 h | A2497P' 72 h |
|-----------------|-----------------------------------|----------------------|------------------------------------------------|------------------------------------------|---------------|-----------------|-----------|-------------|-----------|-------------|------------|--------------|------------|--------------|------------|--------------|
| EIF1AX /// L    | eukaryotic translation initiation | chrXp22.12           | translation                                    | Translation_Factors // GenMAPP           | 1.01          | 1.01            | -1.06     | -1.14       | -1.01     | 1.08        | -1.23      | -1.15        | -1.35      | -1.09        | -1.34      | -1.48        |
| EIF1AX /// L    | eukaryotic translation initiation | chrXp22.12           | translation                                    | Translation_Factors // GenMAPP           | 1.25          | 1.11            | 1.01      | 1.05        | -1.08     | 1.12        | -1.34      | -1.18        | -1.36      | -1.28        | -1.35      | -1.43        |
| EIF1B           | eukaryotic translation initiation | chr3p22.1            | regulation of translational initiation         | ---                                      | -1.04         | 1.07            | -1.01     | -1.69       | 1.60      | 1.40        | -2.25      | 1.13         | 3.14       | 2.50         | -1.42      | -5.12        |
| EIF2AK1         | eukaryotic translation initiation | chr7p22              | translation                                    | Translation_Factors // GenMAPP           | 1.00          | -1.09           | -1.00     | 1.09        | 1.07      | 1.17        | 1.08       | -1.06        | -2.17      | -2.03        | -2.22      | -2.28        |
| EIF2AK2         | eukaryotic translation initiation | chr2p22-p21          | activation of MAPKK activity                   | Translation_Factors // GenMAPP           | -1.00         | 1.16            | 1.05      | -1.16       | 1.11      | 1.10        | 1.23       | 1.02         | -1.19      | -1.33        | -1.11      | -1.60        |
| EIF2AK2         | eukaryotic translation initiation | chr2p22-p21          | activation of MAPKK activity                   | Translation_Factors // GenMAPP           | 1.01          | 1.03            | 1.03      | -1.00       | -1.02     | 1.15        | -1.16      | -1.05        | -1.29      | -1.06        | -1.33      | -1.45        |
| EIF2AK4         | eukaryotic translation initiation | chr15q15.1           | regulation of translational initiation         | ---                                      | 1.19          | 1.22            | 1.02      | -1.09       | -1.01     | 1.16        | 1.31       | 1.12         | 1.83       | 2.00         | 1.18       | -1.00        |
| EIF2AK4         | eukaryotic translation initiation | chr15q15.1           | regulation of translational initiation         | ---                                      | 1.13          | 1.07            | 1.11      | 1.10        | -1.12     | 1.07        | -1.08      | -1.02        | -1.54      | -1.21        | -1.46      | -1.57        |
| EIF2B2          | eukaryotic translation initiation | chr14q24.3           | ovarian follicle development                   | Translation_Factors // GenMAPP           | -1.10         | -1.05           | -1.00     | 1.06        | 1.01      | -1.09       | 1.15       | 1.07         | 1.26       | 1.20         | 1.24       | 1.28         |
| EIF2B5          | eukaryotic translation initiation | chr3q27.1            | ovarian follicle development                   | Translation_Factors // GenMAPP           | 1.04          | -1.10           | 1.25      | 1.01        | -1.03     | -1.05       | -1.02      | 1.09         | 1.14       | 1.03         | 1.79       | 1.84         |
| EIF2B5          | eukaryotic translation initiation | chr3q27.1            | ovarian follicle development                   | Translation_Factors // GenMAPP           | -1.08         | -1.06           | -1.01     | 1.05        | -1.01     | -1.08       | 1.02       | 1.10         | -1.20      | -1.22        | -1.39      | -1.20        |
| EIF2S1          | eukaryotic translation initiation | chr14q23.3           | translation                                    | Translation_Factors // GenMAPP           | -1.03         | 1.04            | -1.07     | -1.02       | -1.07     | -1.06       | 1.02       | -1.03        | 1.15       | 1.07         | 1.17       | 1.10         |
| EIF2S2          | eukaryotic translation initiation | chr20q11.2           | in utero embryonic development                 | Translation_Factors // GenMAPP           | -1.02         | -1.02           | -1.10     | -1.03       | 1.04      | 1.02        | 1.01       | 1.02         | 1.22       | 1.06         | 1.30       | 1.40         |
| EIF2S2          | eukaryotic translation initiation | chr20q11.2           | in utero embryonic development                 | Translation_Factors // GenMAPP           | -1.03         | 1.01            | 1.03      | -1.03       | 1.07      | -1.06       | 1.12       | 1.00         | 1.31       | 1.15         | 1.28       | 1.27         |
| EIF2S3          | eukaryotic translation initiation | chrXp22.2-p22.1      | GTP catabolic process                          | Translation_Factors // GenMAPP           | -1.04         | 1.07            | -1.00     | -1.00       | -1.01     | -1.01       | 1.06       | -1.08        | 1.06       | -1.00        | -1.18      | -1.26        |
| EIF3A           | eukaryotic translation initiation | chr10q26             | formation of translation preinitiation complex | Translation_Factors // GenMAPP           | 1.15          | 1.15            | 1.11      | 1.06        | -1.03     | 1.05        | -1.01      | 1.02         | -1.38      | -1.27        | -1.07      | -1.25        |
| EIF3A           | eukaryotic translation initiation | chr10q26             | formation of translation preinitiation complex | Translation_Factors // GenMAPP           | 1.05          | 1.12            | -1.14     | -1.06       | -1.08     | 1.01        | -1.05      | -1.06        | -1.07      | -1.05        | -1.04      | -1.20        |
| EIF3B           | eukaryotic translation initiation | chr7p22.3            | formation of translation preinitiation complex | Translation_Factors // GenMAPP           | -1.05         | -1.08           | 1.13      | 1.07        | 1.25      | 1.05        | 1.08       | 1.01         | 1.31       | 1.11         | 1.11       | 1.16         |
| EIF3C /// EIF   | eukaryotic translation initiation | chr16p11.2           | formation of translation preinitiation complex | Translation_Factors // GenMAPP           | -1.06         | -1.05           | -1.01     | 1.07        | -1.01     | -1.06       | 1.17       | 1.12         | 1.18       | 1.01         | -1.27      | -1.15        |
| EIF3C /// EIF   | eukaryotic translation initiation | chr16p11.2           | formation of translation preinitiation complex | Translation_Factors // GenMAPP           | -1.10         | -1.05           | -1.01     | 1.07        | -1.06     | -1.12       | 1.16       | 1.17         | 1.19       | 1.03         | -1.32      | -1.16        |
| EIF3C /// EIF   | eukaryotic translation initiation | chr16p11.2           | formation of translation preinitiation complex | Translation_Factors // GenMAPP           | -1.06         | -1.04           | -1.01     | 1.07        | -1.00     | -1.13       | 1.17       | 1.19         | 1.30       | 1.03         | -1.24      | -1.16        |
| EIF3D           | eukaryotic translation initiation | chr22q13.1           | formation of translation preinitiation complex | Translation_Factors // GenMAPP           | -1.07         | -1.09           | -1.03     | -1.00       | -1.02     | -1.05       | 1.15       | 1.12         | 1.33       | 1.18         | 1.14       | 1.24         |
| EIF3E           | eukaryotic translation initiation | chr8q22-q23          | nuclear-transcribed mRNA catabolic process     | Translation_Factors // GenMAPP           | -1.05         | 1.03            | -1.00     | 1.00        | -1.03     | -1.02       | 1.14       | 1.05         | 1.21       | 1.08         | 1.04       | 1.03         |
| EIF3E           | eukaryotic translation initiation | chr8q22-q23          | nuclear-transcribed mRNA catabolic process     | Translation_Factors // GenMAPP           | 1.13          | 1.14            | 1.32      | 1.43        | 1.03      | 1.18        | -1.06      | 1.10         | 1.18       | 1.43         | -1.09      | -1.02        |
| EIF3F           | eukaryotic translation initiation | chr11p15.4           | formation of translation preinitiation complex | Translation_Factors // GenMAPP           | 1.69          | -1.24           | -1.93     | 2.19        | 1.00      | 2.47        | 1.87       | 1.25         | 13.29      | 2.79         | 6.80       | 1.40         |
| EIF3F           | eukaryotic translation initiation | chr11p15.4           | formation of translation preinitiation complex | Translation_Factors // GenMAPP           | 1.21          | 1.16            | 1.10      | 1.01        | 1.10      | 1.27        | -1.09      | 1.11         | -5.02      | -4.28        | -4.57      | -5.60        |
| EIF3H           | eukaryotic translation initiation | chr8q24.11           | formation of translation preinitiation complex | Translation_Factors // GenMAPP           | 1.50          | 1.03            | -1.05     | 1.07        | -1.63     | -1.25       | -1.29      | -1.15        | -2.36      | -1.95        | -3.17      | -3.79        |
| EIF3I           | eukaryotic translation initiation | chr1p34.1            | formation of translation preinitiation complex | Translation_Factors // GenMAPP           | -1.07         | -1.14           | -1.05     | -1.00       | 1.09      | 1.02        | 1.09       | 1.03         | 1.42       | 1.26         | 1.12       | 1.17         |
| EIF3J           | eukaryotic translation initiation | chr15q21.1           | formation of translation preinitiation complex | Translation_Factors // GenMAPP           | -1.03         | 1.04            | -1.03     | -1.00       | -1.01     | -1.01       | -1.03      | -1.15        | -1.08      | -1.14        | 1.02       | 1.03         |
| EIF3J-AS1       | EIF3J antisense RNA 1 (head)      | chr15q21.1           | 0                                              | ---                                      | 1.06          | -1.11           | 1.00      | 1.06        | 1.24      | 1.33        | -1.18      | 1.06         | 1.11       | 1.12         | 1.32       | 1.50         |
| EIF3L           | eukaryotic translation initiation | chr22q               | formation of translation preinitiation complex | ---                                      | -1.07         | -1.01           | -1.04     | 1.06        | -1.05     | -1.10       | 1.12       | 1.09         | 1.22       | 1.05         | -1.13      | -1.11        |
| EIF3LP3 /// EIF | eukaryotic translation initiation | ---                  | 0                                              | ---                                      | -1.04         | 1.15            | -1.09     | 1.05        | -1.39     | -1.16       | -1.26      | -1.20        | -1.06      | 1.02         | -1.50      | -1.37        |
| EIF3M           | eukaryotic translation initiation | chr11p13             | formation of translation preinitiation complex | ---                                      | -1.20         | 1.11            | 1.23      | -1.24       | 1.01      | 1.25        | -2.11      | -1.11        | -1.70      | -2.06        | -2.33      | -1.61        |
| EIF3M           | eukaryotic translation initiation | chr11p13             | formation of translation preinitiation complex | ---                                      | 1.04          | 1.12            | -1.09     | 1.00        | -1.12     | -1.05       | 1.04       | -1.04        | -1.02      | 1.05         | -1.03      | -1.03        |
| EIF4A2 /// M    | eukaryotic translation initiation | chr3q27 /// chr3q27  | nuclear-transcribed mRNA catabolic process     | Translation_Factors // GenMAPP           | 1.02          | 1.05            | 1.03      | 1.06        | 1.04      | 1.05        | 1.30       | 1.03         | 1.29       | 1.12         | 1.26       | 1.01         |
| EIF4A3          | eukaryotic translation initiation | chr17q25.3           | nuclear-transcribed mRNA catabolic process     | ---                                      | -1.07         | -1.03           | -1.06     | -1.11       | -1.09     | -1.07       | -1.01      | 1.04         | 1.12       | 1.20         | -1.05      | 1.07         |
| EIF4E           | eukaryotic translation initiation | chr4q21-q25          | G1                                             | Hypertrophy_model // GenMAPP /// Transla | 1.00          | 1.23            | 1.75      | 1.10        | 1.31      | 1.40        | -1.32      | 1.13         | -2.04      | -1.94        | -2.00      | -2.66        |
| EIF4E2          | eukaryotic translation initiation | chr2q37.1            | in utero embryonic development                 | ---                                      | 1.23          | 1.49            | 1.12      | 1.20        | 1.13      | -1.10       | 1.13       | -1.12        | -1.35      | -1.19        | -1.72      | -1.88        |
| EIF4E2          | eukaryotic translation initiation | chr2q37.1            | in utero embryonic development                 | ---                                      | -1.00         | 1.04            | 1.15      | 1.15        | 1.05      | 1.05        | -1.36      | -1.08        | -1.41      | -1.35        | 1.07       | 1.10         |
| EIF4E2          | eukaryotic translation initiation | chr2q37.1            | in utero embryonic development                 | ---                                      | 1.03          | -1.05           | 1.10      | 1.20        | -1.00     | -1.04       | 1.21       | 1.19         | 1.52       | 1.23         | 1.25       | 1.32         |
| EIF4E2          | eukaryotic translation initiation | chr2q37.1            | in utero embryonic development                 | ---                                      | -1.04         | 1.00            | -1.07     | 1.00        | 1.08      | -1.08       | 1.14       | 1.19         | 1.62       | 1.27         | 1.38       | 1.49         |
| EIF4E3          | eukaryotic translation initiation | chr3p14              | translation                                    | ---                                      | 1.04          | 1.00            | -1.08     | 1.03        | 1.03      | -1.04       | -1.33      | 1.04         | -2.38      | -1.62        | -1.37      | -1.28        |
| EIF4EBP1        | eukaryotic translation initiation | chr8p12              | G1                                             | Hypertrophy_model // GenMAPP /// Transla | -1.05         | -1.08           | -1.07     | 1.03        | 1.01      | -1.02       | 1.13       | 1.08         | 1.46       | 1.31         | 1.25       | 1.37         |
| EIF4EBP2        | eukaryotic translation initiation | chr10q21-q22         | translation                                    | Translation_Factors // GenMAPP           | -1.04         | -1.01           | -1.02     | -1.04       | -1.13     | 1.11        | -1.68      | -1.27        | -2.62      | -1.87        | -3.93      | -2.98        |
| EIF4EBP2        | eukaryotic translation initiation | chr10q21-q22         | translation                                    | Translation_Factors // GenMAPP           | -1.04         | -1.02           | 1.10      | -1.02       | 1.09      | -1.01       | -1.16      | -1.02        | -1.59      | -1.41        | -1.94      | -1.79        |
| EIF4EBP2        | eukaryotic translation initiation | chr10q21-q22         | translation                                    | Translation_Factors // GenMAPP           | -1.27         | 1.00            | 1.23      | 1.43        | 1.08      | 1.06        | -1.02      | 1.36         | -2.48      | -2.05        | -2.36      | -1.98        |
| EIF4EBP2        | eukaryotic translation initiation | chr10q21-q22         | translation                                    | Translation_Factors // GenMAPP           | -1.08         | -1.06           | -1.00     | -1.10       | 1.08      | -1.07       | -1.19      | -1.06        | -1.76      | -1.70        | -1.75      | -1.97        |
| EIF4ENF1        | eukaryotic translation initiation | chr22q11.2           | translational initiation                       | ---                                      | 1.15          | -1.13           | 1.43      | 1.61        | -1.13     | 1.33        | -2.28      | 1.12         | -1.84      | -5.44        | -1.83      | -1.83        |
| EIF4G2          | eukaryotic translation initiation | chr11p15             | translation                                    | Circadian_Exercise // GenMAPP            | 1.01          | 1.07            | -1.06     | 1.02        | -1.12     | -1.00       | -1.09      | -1.13        | -1.08      | -1.02        | -1.18      | -1.21        |
| EIF4G3          | eukaryotic translation initiation | chr1p36.12           | positive regulation of protein phosphorylation | Translation_Factors // GenMAPP           | 1.47          | 1.50            | -1.00     | 1.35        | -1.25     | 1.12        | 2.31       | 1.71         | 4.97       | 5.42         | 3.40       | 4.03         |
| EIF4G3          | eukaryotic translation initiation | chr1p36.12           | positive regulation of protein phosphorylation | Translation_Factors // GenMAPP           | -1.20         | -1.20           | 1.03      | 1.07        | 1.14      | 1.05        | -1.01      | 1.01         | -1.20      | -1.10        | -1.18      | -1.08        |
| EIF4G3          | eukaryotic translation initiation | chr1p36.12           | positive regulation of protein phosphorylation | Translation_Factors // GenMAPP           | -1.03         | -1.08           | -1.22     | -1.02       | -1.15     | -1.03       | -1.15      | -1.02        | -1.12      | -1.02        | -1.18      | -1.24        |
| EIF4H           | eukaryotic translation initiation | chr7q11.23           | translation                                    | Translation_Factors // GenMAPP           | -1.07         | -1.03           | -1.05     | -1.06       | -1.05     | -1.02       | 1.04       | 1.00         | 1.35       | 1.29         | 1.08       | 1.16         |
| EIF5            | eukaryotic translation initiation | chr14q32.32          | GTP catabolic process                          | Translation_Factors // GenMAPP           | -1.02         | 1.07            | -1.04     | -1.02       | 1.03      | 1.02        | -1.14      | -1.14        | -1.70      | -1.87        | -1.26      | -1.36        |
| EIF5            | eukaryotic translation initiation | chr14q32.32          | GTP catabolic process                          | Translation_Factors // GenMAPP           | -1.04         | -1.01           | -1.01     | -1.03       | 1.01      | -1.15       | -1.23      | -1.21        | -1.64      | -2.19        | -1.03      | -1.13        |
| EIF5            | eukaryotic translation initiation | chr14q32.32          | GTP catabolic process                          | Translation_Factors // GenMAPP           | -1.11         | -1.06           | -1.02     | -1.02       | 1.04      | -1.06       | -1.15      | -1.06        | -1.73      | -2.21        | -1.07      | -1.06        |
| EIF5            | eukaryotic translation initiation | chr14q32.32          | GTP catabolic process                          | Translation_Factors // GenMAPP           | -1.04         | 1.04            | 1.00      | 1.01        | 1.32      | 1.04        | -1.86      | -1.52        | -2.10      | -2.33        | -2.06      | -1.90        |
| EIF5            | eukaryotic translation initiation | chr14q32.32          | GTP catabolic process                          | Translation_Factors // GenMAPP           | -1.12         | -1.06           | -1.01     | -1.01       | 1.02      | 1.01        | -1.18      | -1.13        | -1.94      | -2.33        | -1.30      | -1.30        |
| EIF5A           | eukaryotic translation initiation | chr17p13-p12         | mRNA export from nucleus                       | Translation_Factors // GenMAPP           | 1.28          | 1.13            | 1.04      | -1.06       | 1.07      | 1.07        | 1.02       | 1.14         | 1.15       | -1.04        | -1.13      | -1.30        |
| EIF5A           | eukaryotic translation initiation | chr17p13-p12         | mRNA export from nucleus                       | Translation_Factors // GenMAPP           | 1.14          | 1.11            | -1.05     | -1.13       | 1.16      | 1.11        | 1.04       | -1.11        | 1.08       | 1.02         | -1.18      | -1.28        |
| EIF5A2          | eukaryotic translation initiation | chr3q26.2            | translation                                    | ---                                      | 1.20          | 1.05            | 1.29      | -1.15       | 1.15      | 1.30        | 1.07       | -1.33        | 2.11       | 2.05         | 1.56       | 1.33         |
| EIF5A2          | eukaryotic translation initiation | chr3q26.2            | translation                                    | ---                                      | 1.22          | -1.01           | 1.03      | 1.08        | 1.08      | 1.12        | -1.44      | -1.13        | 1.18       | 1.05         | 1.26       | 1.05         |
| EIF5B           | eukaryotic translation initiation | chr2q11.2            | GTP catabolic process                          | Translation_Factors // GenMAPP           | -1.01         | 1.02            | 1.08      | 1.05        | 1.01      | -1.03       | 1.06       | 1.07         | 1.01       | 1.09         | 1.13       | 1.15         |
| EIF5B           | eukaryotic translation initiation | chr2q11.2            | GTP catabolic process                          | Translation_Factors // GenMAPP           | 1.11          | 1.08            | -1.02     | 1.02        | -1.15     | -1.07       | -1.21      | -1.05        | -1.32      | -1.33        | -1.26      | -1.41        |
| EIF5B           | eukaryotic translation initiation | chr2q11.2            | GTP catabolic process                          | Translation_Factors // GenMAPP           | -1.25         | -1.05           | 1.14      | 1.10        | -1.08     | -1.28       | 1.02       | 1.29         | 1.35       | 1.20         | 1.19       | 1.43         |
| ELAC1           | elafC ribonuclease Z 1            | chr18q21             | rRNA processing                                | ---                                      | 1.05          | 1.09            | -1.09     | -1.27       | 1.18      | -1.27       | -2.13      | 1.03         | -3.81      | -3.66        | -4.87      | -3.23        |

| ID            | Gene Title                    | Chromosomal Location | 1st Gene Ontology Biological Process      | Pathway                               | A2497 30 mins | A2497P' 30 mins | A2497 2 h | A2497P' 2 h | A2497 4 h | A2497P' 4 h | A2497 24 h | A2497P' 24 h | A2497 48 h | A2497P' 48 h | A2497 72 h | A2497P' 72 h |
|---------------|-------------------------------|----------------------|-------------------------------------------|---------------------------------------|---------------|-----------------|-----------|-------------|-----------|-------------|------------|--------------|------------|--------------|------------|--------------|
| ELAC1         | elaC ribonuclease Z 1         | chr18q21             | tRNA processing                           | ---                                   | 1.23          | 1.07            | 1.26      | 1.45        | 1.18      | 1.04        | -1.38      | -1.18        | -2.87      | -2.90        | -4.23      | -6.72        |
| ELANE         | elastase, neutrophil express  | chr19p13.3           | response to yeast                         | ---                                   | 5.20          | 3.01            | -1.40     | -2.94       | -10.48    | -3.03       | 1.10       | -1.77        | 3.35       | 2.88         | -1.17      | -1.07        |
| ELAVL1        | ELAV (embryonic lethal, a     | chr19p13.2           | regulation of translation                 | ---                                   | 1.01          | 1.00            | 1.05      | -1.01       | 1.01      | 1.02        | 1.09       | -1.04        | 1.29       | 1.15         | 1.60       | 1.45         |
| ELAVL1        | ELAV (embryonic lethal, a     | chr19p13.2           | regulation of translation                 | ---                                   | -1.16         | -1.23           | 1.09      | 1.23        | 1.22      | 1.17        | -1.10      | 1.21         | 1.51       | 1.18         | 1.93       | 2.29         |
| ELF2          | E74-like factor 2 (ets doma   | chr4q28              | transcription, DNA-dependent              | ---                                   | 1.28          | 1.21            | 1.04      | -1.00       | -1.23     | -1.02       | -1.11      | 1.08         | -1.43      | -1.10        | -1.42      | -1.59        |
| ELF2          | E74-like factor 2 (ets doma   | chr4q28              | transcription, DNA-dependent              | ---                                   | 1.01          | -1.35           | 1.05      | -1.08       | 1.15      | 1.22        | -1.27      | -1.22        | -3.36      | -2.71        | -2.04      | -1.94        |
| ELF3          | E74-like factor 3 (ets doma   | chr1q32.2            | blastocyst development                    | ---                                   | -1.10         | -1.07           | 1.03      | 1.15        | -1.04     | 1.01        | -1.08      | 1.15         | -2.73      | -2.08        | -1.80      | -1.59        |
| ELF3          | E74-like factor 3 (ets doma   | chr1q32.2            | blastocyst development                    | ---                                   | -1.03         | -1.02           | -1.13     | 1.02        | -1.04     | -1.04       | -1.47      | -1.08        | -4.63      | -2.72        | -3.71      | -3.38        |
| ELF3          | E74-like factor 3 (ets doma   | chr1q32.2            | blastocyst development                    | ---                                   | 1.07          | 1.11            | -1.03     | 1.08        | -1.06     | -1.06       | -1.20      | -1.07        | -2.08      | 1.23         | -1.27      | -1.24        |
| ELF4          | E74-like factor 4 (ets doma   | chrXq26              | natural killer cell proliferation         | ---                                   | 1.09          | 1.09            | -1.00     | 1.02        | -1.04     | -1.01       | 1.07       | 1.05         | -1.08      | -1.10        | -1.13      | -1.12        |
| ELFN2         | extracellular leucine-rich re | chr22q13.1           | negative regulation of phosphatase activi | ---                                   | -1.19         | -1.16           | 1.16      | 1.24        | -1.20     | -1.05       | 1.03       | 1.26         | 1.19       | 1.27         | 1.69       | 1.88         |
| ELK2AP        | ELK2A, member of ETS o        | chr14q32.3           | 0                                         | ---                                   | -1.23         | -1.02           | -1.32     | -1.26       | 1.04      | 1.24        | -1.31      | -1.11        | -1.31      | 1.12         | -1.04      | 1.05         |
| ELK3          | ELK3, ETS-domain protein      | chr12q23             | angiogenesis                              | ---                                   | 1.13          | 1.22            | -1.01     | -1.16       | -1.26     | -1.05       | 1.06       | 1.09         | 1.27       | 1.25         | -1.08      | -1.19        |
| ELK4          | ELK4, ETS-domain protein      | chr1q32              | negative regulation of transcription from | ---                                   | 1.22          | 1.09            | 1.04      | -1.32       | 1.04      | 1.04        | -1.08      | 1.02         | -1.22      | -1.48        | 1.48       | -1.10        |
| ELK4          | ELK4, ETS-domain protein      | chr1q32              | negative regulation of transcription from | ---                                   | -1.11         | -1.10           | 1.23      | -1.07       | 1.50      | 1.27        | 1.22       | 1.08         | -1.12      | -1.15        | 1.16       | 1.13         |
| ELK4          | ELK4, ETS-domain protein      | chr1q32              | negative regulation of transcription from | ---                                   | 1.07          | -1.13           | 1.10      | 1.53        | 1.19      | -1.07       | 1.32       | 1.32         | 1.53       | 1.39         | 1.28       | 1.47         |
| ELK4          | ELK4, ETS-domain protein      | chr1q32              | negative regulation of transcription from | ---                                   | -1.01         | -1.02           | 1.05      | 1.02        | 1.16      | 1.04        | 1.04       | -1.00        | -1.16      | -1.27        | -1.14      | -1.22        |
| ELK4          | ELK4, ETS-domain protein      | chr1q32              | negative regulation of transcription from | ---                                   | -1.24         | -1.15           | -1.01     | -1.12       | 1.33      | 1.41        | -1.38      | -1.01        | -1.93      | -1.20        | -1.59      | -2.10        |
| ELL           | elongation factor RNA pol     | chr19p13.1           | in utero embryonic development            | ---                                   | 1.15          | -1.11           | -1.38     | -1.11       | -1.09     | 1.20        | 1.15       | -1.21        | 1.26       | -1.47        | 2.90       | 2.30         |
| ELL           | elongation factor RNA pol     | chr19p13.1           | in utero embryonic development            | ---                                   | -1.27         | 1.01            | 1.22      | 1.24        | -1.09     | 1.11        | 1.27       | 1.13         | 1.12       | -1.06        | 1.56       | 1.58         |
| ELL           | elongation factor RNA pol     | chr19p13.1           | in utero embryonic development            | ---                                   | 1.41          | -1.11           | 1.12      | -1.31       | 1.09      | -1.27       | -1.10      | 1.18         | 1.81       | 2.15         | 3.31       | 2.59         |
| ELL2          | elongation factor, RNA pol    | chr5q15              | transcription, DNA-dependent              | ---                                   | -1.06         | -1.14           | 1.10      | -1.00       | 1.06      | 1.08        | 1.78       | 1.06         | 3.36       | 2.74         | 3.53       | 2.92         |
| ELL2          | elongation factor, RNA pol    | chr5q15              | transcription, DNA-dependent              | ---                                   | -1.08         | 1.04            | 1.04      | 1.06        | 1.15      | 1.15        | 1.18       | 1.01         | 1.43       | 1.83         | 1.70       | 1.81         |
| ELL2          | elongation factor, RNA pol    | chr5q15              | transcription, DNA-dependent              | ---                                   | 1.16          | 1.17            | 1.19      | -1.08       | -1.22     | -1.04       | -1.10      | -1.02        | 1.60       | 1.68         | 1.32       | 1.24         |
| ELL2P3 /// EL | elongation factor, RNA pol    | ---                  | 0                                         | ---                                   | 1.79          | -1.05           | -2.11     | -1.44       | -1.96     | -3.13       | 6.85       | 2.02         | 3.35       | 1.78         | -1.76      | 5.17         |
| ELMOD2        | ELMO/CED-12 domain co         | chr4q31.1            | phagocytosis                              | ---                                   | 1.04          | -1.08           | 1.10      | 1.12        | 1.06      | 1.01        | -1.21      | -1.06        | -1.39      | -1.32        | -1.10      | -1.12        |
| ELMOD2        | ELMO/CED-12 domain co         | chr4q31.1            | phagocytosis                              | ---                                   | 1.18          | -1.30           | -1.29     | -1.14       | 1.18      | 1.33        | -1.18      | -1.18        | -1.10      | -1.06        | 1.54       | 1.56         |
| ELOVL1        | ELOVL fatty acid elongase     | chr1p34.2            | lipid metabolic process                   | ---                                   | -1.09         | -1.15           | -1.02     | -1.01       | 1.00      | 1.01        | -1.12      | -1.07        | 1.19       | 1.23         | 1.30       | 1.50         |
| ELOVL1        | ELOVL fatty acid elongase     | chr1p34.2            | lipid metabolic process                   | ---                                   | -1.05         | -1.07           | -1.02     | 1.02        | 1.04      | -1.02       | 1.04       | 1.00         | 1.40       | 1.24         | 1.29       | 1.40         |
| ELOVL3        | ELOVL fatty acid elongase     | chr10q24.32          | lipid metabolic process                   | ---                                   | -1.42         | -1.40           | 1.47      | -5.56       | -4.03     | -1.29       | 1.46       | 3.03         | 2.46       | 2.04         | 2.61       | 2.85         |
| ELOVL5        | ELOVL fatty acid elongase     | chr6p21.1-p12.1      | lipid metabolic process                   | ---                                   | 1.20          | 1.12            | 1.12      | 1.17        | -1.10     | -1.21       | 1.58       | 1.38         | 1.84       | 1.42         | 3.19       | 2.79         |
| ELOVL5        | ELOVL fatty acid elongase     | chr6p21.1-p12.1      | lipid metabolic process                   | ---                                   | 1.06          | 1.05            | -1.02     | 1.04        | -1.01     | 1.12        | -1.13      | -1.14        | 1.04       | 1.21         | 1.16       | 1.16         |
| ELOVL6        | ELOVL fatty acid elongase     | chr4q25              | lipid metabolic process                   | ---                                   | -1.05         | -1.02           | -1.07     | -1.02       | -1.16     | -1.08       | -1.06      | -1.01        | -1.11      | -1.10        | 1.04       | 1.00         |
| ELOVL6        | ELOVL fatty acid elongase     | chr4q25              | lipid metabolic process                   | ---                                   | 1.18          | 1.08            | 1.03      | -1.07       | 1.02      | -1.05       | -1.29      | -1.09        | -1.09      | 1.05         | -1.16      | -1.09        |
| ELOVL6        | ELOVL fatty acid elongase     | chr4q25              | lipid metabolic process                   | ---                                   | 1.13          | 1.35            | 1.09      | 1.02        | -1.05     | -1.02       | -1.18      | -1.41        | -1.44      | -1.07        | -1.09      | -1.09        |
| ELOVL7        | ELOVL fatty acid elongase     | chr5q12.1            | lipid metabolic process                   | ---                                   | 1.40          | 1.30            | -1.06     | -1.20       | 1.03      | 1.22        | -1.21      | 1.01         | -1.06      | -1.09        | 1.19       | -1.01        |
| ELP2          | elongator acetyltransferase   | chr18q12.2           | transcription, DNA-dependent              | ---                                   | -1.22         | -1.16           | -1.00     | -1.00       | 1.02      | 1.05        | 1.13       | -1.03        | -1.30      | -1.25        | -1.03      | 1.09         |
| ELP2          | elongator acetyltransferase   | chr18q12.2           | transcription, DNA-dependent              | ---                                   | -1.00         | -1.16           | -1.04     | 1.08        | 1.02      | -1.10       | 1.31       | 1.14         | 1.34       | 1.34         | 1.60       | 1.87         |
| ELP2          | elongator acetyltransferase   | chr18q12.2           | transcription, DNA-dependent              | ---                                   | -1.26         | -1.42           | -1.08     | -1.09       | -1.03     | -1.10       | -1.52      | -1.45        | -1.65      | -1.41        | -1.06      | 1.15         |
| ELP3          | elongator acetyltransferase   | chr8p21.1            | transcription, DNA-dependent              | ---                                   | 1.02          | 1.04            | -1.08     | -1.09       | -1.08     | -1.06       | -1.05      | -1.24        | -1.10      | 1.02         | 1.07       | 1.07         |
| ELP3          | elongator acetyltransferase   | chr8p21.1            | transcription, DNA-dependent              | ---                                   | 1.00          | 1.08            | -1.07     | -1.14       | 1.04      | -1.11       | 1.11       | -1.01        | -1.12      | -1.13        | 1.35       | 1.30         |
| ELP4          | elongator acetyltransferase   | chr11p13             | transcription, DNA-dependent              | ---                                   | 1.08          | 1.08            | -1.01     | -1.08       | 1.04      | -1.02       | 1.09       | -1.09        | 1.11       | 1.07         | 1.14       | 1.04         |
| ELP5          | elongator acetyltransferase   | chr17p13.1           | transcription, DNA-dependent              | ---                                   | -1.19         | -1.18           | -1.02     | -1.14       | 1.17      | 1.04        | -1.03      | -1.12        | 1.22       | 1.13         | 1.23       | 1.34         |
| ELP5          | elongator acetyltransferase   | chr17p13.1           | transcription, DNA-dependent              | ---                                   | -1.13         | -1.19           | 1.19      | -1.00       | 1.14      | 1.11        | -1.17      | -1.20        | 1.02       | 1.09         | 1.29       | 1.36         |
| ELP6          | elongator acetyltransferase   | chr3p21.31           | transcription, DNA-dependent              | ---                                   | -1.14         | -1.07           | 1.01      | 1.02        | 1.14      | 1.06        | -1.06      | -1.05        | -1.57      | -1.38        | -1.53      | -1.46        |
| ELP6          | elongator acetyltransferase   | chr3p21.31           | transcription, DNA-dependent              | ---                                   | -1.03         | -1.03           | -1.04     | 1.08        | 1.07      | -1.08       | -1.01      | 1.18         | -1.67      | -2.06        | -1.98      | -2.18        |
| ELTD1         | EGF, latrophilin and seven    | chr1p33-p32          | signal transduction                       | GPCRDB_Class_B_Secretin-like // GenMA | 1.27          | 1.17            | -1.05     | 1.01        | -2.51     | -1.17       | -1.66      | -1.39        | -4.56      | -3.59        | -7.35      | -6.41        |
| EMB           | embigin                       | chr5q11.1            | cell adhesion                             | ---                                   | 1.17          | 1.21            | 1.01      | -1.04       | -1.04     | 1.02        | -1.17      | -1.09        | -1.67      | -1.53        | -2.04      | -2.50        |
| EMC1          | ER membrane protein com       | chr1p36.13           | 0                                         | ---                                   | -1.07         | -1.14           | 1.04      | 1.10        | 1.03      | -1.01       | 1.14       | 1.12         | -1.22      | -1.13        | -1.41      | -1.39        |
| EMC1          | ER membrane protein com       | chr1p36.13           | 0                                         | ---                                   | 1.12          | 1.09            | 1.04      | -1.14       | 1.07      | 1.06        | 1.03       | 1.05         | -1.58      | -1.38        | -1.53      | -1.75        |
| EMC1          | ER membrane protein com       | chr1p36.13           | 0                                         | ---                                   | 1.06          | 1.15            | 1.09      | -1.23       | -1.10     | -1.02       | -1.26      | -1.14        | -1.50      | -1.19        | -1.83      | -1.80        |
| EMC2          | ER membrane protein com       | chr8q23.1            | 0                                         | ---                                   | 1.04          | -1.05           | 1.03      | 1.15        | 1.22      | 1.12        | 1.17       | -1.02        | 1.06       | 1.22         | 1.33       | 1.37         |
| EMC3          | ER membrane protein com       | chr3p25.3            | 0                                         | ---                                   | -1.12         | -1.04           | -1.02     | 1.01        | 1.18      | -1.01       | -1.02      | 1.01         | 1.13       | 1.13         | 1.09       | 1.22         |
| EMC3          | ER membrane protein com       | chr3p25.3            | 0                                         | ---                                   | -1.07         | -1.04           | 1.11      | 1.10        | 1.12      | -1.13       | 1.02       | 1.04         | -1.29      | -1.48        | -1.47      | -1.61        |
| EMC7          | ER membrane protein com       | chr15q14             | 0                                         | ---                                   | 1.03          | -1.04           | -1.03     | 1.00        | -1.03     | 1.02        | -1.06      | -1.06        | 1.18       | 1.33         | 1.41       | 1.55         |
| EMC7          | ER membrane protein com       | chr15q14             | 0                                         | ---                                   | -1.05         | -1.02           | 1.00      | 1.02        | -1.00     | -1.05       | 1.18       | 1.07         | 1.57       | 1.27         | 1.28       | 1.30         |
| EMC8          | ER membrane protein com       | chr16q24             | 0                                         | ---                                   | -1.03         | 1.04            | 1.09      | 1.01        | 1.10      | 1.06        | -1.12      | -1.05        | -1.12      | -1.34        | -1.30      | -1.18        |
| EMC8          | ER membrane protein com       | chr16q24             | 0                                         | ---                                   | 1.00          | -1.00           | -1.03     | 1.09        | -1.05     | -1.21       | 1.04       | 1.08         | 1.48       | 1.22         | 1.42       | 1.59         |
| EMC8          | ER membrane protein com       | chr16q24             | 0                                         | ---                                   | -1.03         | -1.09           | -1.02     | 1.10        | -1.06     | -1.06       | -1.00      | 1.02         | 1.57       | 1.29         | 1.35       | 1.57         |
| EMC9          | ER membrane protein com       | chr14q11.2           | 0                                         | ---                                   | -1.07         | -1.11           | 1.06      | 1.01        | 1.15      | -1.04       | 1.06       | 1.00         | 1.21       | 1.14         | 1.12       | 1.17         |
| EMD           | emerin                        | chrXq28              | mitotic cell cycle                        | ---                                   | -1.16         | -1.26           | -1.06     | -1.08       | -1.08     | 1.16        | -1.15      | 1.10         | 1.31       | 1.42         | 1.05       | 1.06         |
| EME1          | essential meiotic endonucle   | chr17q21.33          | DNA metabolic process                     | ---                                   | 1.02          | 1.02            | -1.03     | 1.06        | 1.01      | 1.01        | 1.02       | -1.02        | 1.47       | 1.23         | 1.24       | 1.24         |
| EME2          | essential meiotic endonucle   | chr16p13.3           | DNA metabolic process                     | ---                                   | 1.07          | -1.10           | -1.11     | 1.29        | -1.11     | -1.14       | -1.44      | -1.12        | -2.51      | -1.88        | -3.08      | -2.21        |
| EME2          | essential meiotic endonucle   | chr16p13.3           | DNA metabolic process                     | ---                                   | -1.12         | -1.04           | 1.06      | 1.39        | 1.15      | 1.11        | 1.14       | 1.12         | -2.48      | -2.64        | -1.11      | -1.92        |
| EME2          | essential meiotic endonucle   | chr16p13.3           | DNA metabolic process                     | ---                                   | 1.10          | 1.10            | 1.05      | 1.33        | -1.16     | -1.13       | -1.05      | -1.06        | -1.69      | -1.17        | -2.06      | -1.50        |
| EMG1          | EMG1 N1-specific pseudo       | chr12p13.3           | rRNA processing                           | ---                                   | 1.03          | 1.09            | -1.00     | -1.05       | -1.01     | -1.11       | 1.14       | -1.03        | 1.30       | 1.14         | 1.07       | -1.11        |



| ID           | Gene Title                           | Chromosomal Location | 1st Gene Ontology Biological Process           | Pathway                               | A2497 30 mins | A2497P' 30 mins | A2497 2 h | A2497P' 2 h | A2497 4 h | A2497P' 4 h | A2497 24 h | A2497P' 24 h | A2497 48 h | A2497P' 48 h | A2497 72 h | A2497P' 72 h |
|--------------|--------------------------------------|----------------------|------------------------------------------------|---------------------------------------|---------------|-----------------|-----------|-------------|-----------|-------------|------------|--------------|------------|--------------|------------|--------------|
| EPB41L4A-A   | EPB41L4A antisense RNA               | chr5q22.2            | 0                                              | ---                                   | -1.00         | -1.07           | 1.04      | 1.02        | 1.12      | -1.06       | 1.46       | 1.26         | 1.16       | -1.07        | 1.40       | 1.35         |
| EPB41L4B     | erythrocyte membrane protein         | chr9q31-q32          | actomyosin structure organization              | ---                                   | 3.85          | 2.55            | 2.60      | 1.86        | 2.15      | 3.56        | -2.99      | 1.36         | 3.37       | 2.30         | -1.86      | 3.61         |
| EPB41L4B     | erythrocyte membrane protein         | chr9q31-q32          | actomyosin structure organization              | ---                                   | -1.31         | -1.06           | 1.44      | 2.36        | -1.34     | -1.09       | -1.28      | -1.12        | -1.28      | -1.37        | -1.21      | -1.35        |
| EPC1         | enhancer of polycomb homolog         | chr10p11             | negative regulation of transcription from      | ---                                   | -1.09         | -1.09           | 1.21      | 1.04        | -1.00     | -1.13       | -1.02      | -1.12        | 1.00       | 1.11         | 1.04       | 1.21         |
| EPC1         | enhancer of polycomb homolog         | chr10p11             | negative regulation of transcription from      | ---                                   | 1.05          | 1.08            | -1.03     | 1.04        | -1.02     | 1.04        | -1.12      | -1.07        | -1.11      | -1.02        | 1.03       | 1.10         |
| EPC1         | enhancer of polycomb homolog         | chr10p11             | negative regulation of transcription from      | ---                                   | -1.01         | 1.10            | 1.15      | 1.05        | 1.01      | 1.01        | 1.73       | 1.17         | 2.15       | 1.36         | 1.18       | 1.12         |
| EPC2         | enhancer of polycomb homolog         | chr2q23.1            | DNA repair                                     | ---                                   | 1.48          | 1.54            | -1.05     | -1.19       | -1.15     | -1.04       | -1.03      | -1.01        | -1.51      | -1.61        | -1.49      | -1.87        |
| EPCAM        | epithelial cell adhesion molecule    | chr2p21              | ureteric bud development                       | ---                                   | -1.01         | 1.02            | 1.10      | 1.20        | 1.00      | 1.03        | -1.29      | -1.05        | -1.29      | -1.01        | -1.29      | -1.08        |
| EPG5         | ectopic P-granules autophagy         | chr18q12.3           | autophagy                                      | ---                                   | -1.03         | -1.01           | 1.15      | 1.02        | -1.10     | 1.01        | -1.42      | -1.17        | -1.69      | -1.51        | -1.60      | -1.67        |
| EPG5         | ectopic P-granules autophagy         | chr18q12.3           | autophagy                                      | ---                                   | 1.02          | -1.31           | 1.61      | 1.31        | -1.35     | -1.12       | 1.17       | 1.46         | -1.24      | -1.37        | -2.40      | -1.54        |
| EPHA1-AS1    | EPHA1 antisense RNA 1                | chr7q35              | 0                                              | ---                                   | 2.49          | 2.26            | -1.15     | 1.01        | -1.40     | -2.51       | -1.05      | 1.10         | 2.07       | 1.69         | 1.01       | 1.22         |
| EPHA1-AS1    | EPHA1 antisense RNA 1                | chr7q35              | 0                                              | ---                                   | 1.09          | 1.08            | -1.29     | 1.45        | -1.74     | -1.10       | 1.27       | 1.99         | -1.04      | 1.43         | 4.03       | 3.47         |
| EPHA2        | EPH receptor A2                      | chr1p36              | skeletal system development                    | ---                                   | 1.37          | 1.39            | 1.05      | -1.20       | -1.26     | -1.07       | 1.24       | 1.36         | 2.87       | 1.79         | 2.17       | 1.50         |
| EPHA3        | EPH receptor A3                      | chr3p11.2            | fever generation                               | ---                                   | 1.50          | 1.40            | -1.12     | -1.37       | -1.50     | -1.14       | -1.15      | 1.04         | -1.17      | 1.49         | 1.02       | 1.57         |
| EPHA4        | EPH receptor A4                      | chr2q36.1            | protein phosphorylation                        | ---                                   | 1.21          | 1.23            | 1.55      | 1.35        | -1.10     | -1.48       | -1.35      | -1.34        | -6.53      | -3.96        | -6.04      | -7.60        |
| EPHA4        | EPH receptor A4                      | chr2q36.1            | protein phosphorylation                        | ---                                   | -1.05         | -1.24           | -1.24     | -1.30       | -1.09     | -1.13       | -1.25      | -1.25        | -2.67      | -1.80        | -3.20      | -1.67        |
| EPHA4        | EPH receptor A4                      | chr2q36.1            | protein phosphorylation                        | ---                                   | 1.16          | 1.48            | -1.13     | 1.36        | 1.91      | 2.51        | -1.54      | -1.40        | -39.59     | -2.73        | -5.00      | -12.58       |
| EPHA4        | EPH receptor A4                      | chr2q36.1            | protein phosphorylation                        | ---                                   | 1.21          | 1.60            | -1.25     | -1.02       | 3.40      | 1.24        | 1.30       | 1.30         | -2.79      | -2.80        | -2.78      | -1.26        |
| EPHA5        | EPH receptor A5                      | chr4q13.1            | protein phosphorylation                        | ---                                   | 1.01          | -1.00           | 1.14      | 1.17        | -1.09     | 1.15        | -1.32      | -1.05        | -3.17      | -2.43        | -6.09      | -5.88        |
| EPHA7        | EPH receptor A7                      | chr6q16.1            | protein phosphorylation                        | ---                                   | 1.12          | -1.04           | 1.27      | -1.45       | -1.11     | 1.11        | -1.56      | 1.04         | -3.01      | -3.68        | -2.78      | -2.20        |
| EPHB1        | EPH receptor B1                      | chr3q21-q23          | angiogenesis                                   | ---                                   | 4.07          | 1.39            | 1.08      | 1.05        | 2.53      | 2.66        | -1.84      | 1.08         | 2.18       | 1.55         | -1.57      | 1.23         |
| EPHB2        | EPH receptor B2                      | chr1p36.1-p35        | cell morphogenesis                             | ---                                   | 1.24          | 1.45            | -1.04     | -1.17       | 1.14      | 1.08        | 2.41       | 2.24         | 1.94       | 1.70         | -1.24      | -1.23        |
| EPHB2        | EPH receptor B2                      | chr1p36.1-p35        | cell morphogenesis                             | ---                                   | -1.45         | -1.56           | -1.28     | 1.01        | -1.56     | -1.94       | -1.51      | -1.86        | 1.64       | -1.34        | 3.92       | 3.23         |
| EPHB4        | EPH receptor B4                      | chr7q22              | angiogenesis                                   | ---                                   | -1.19         | -1.32           | -1.11     | -1.06       | 1.07      | -1.19       | -1.19      | -1.09        | 1.05       | 1.02         | 1.11       | -1.05        |
| EPHX1        | epoxide hydrolase 1, microsomal      | chr1q42.1            | cellular aromatic compound metabolic process   | ---                                   | -1.15         | -1.14           | -1.07     | -1.12       | 1.06      | -1.01       | 1.10       | 1.03         | -1.09      | -1.10        | 1.06       | 1.29         |
| EPHX2        | epoxide hydrolase 2, cytosolic       | chr8p21              | lipid metabolic process                        | ---                                   | 1.10          | -1.06           | 1.12      | 1.09        | -1.09     | -1.24       | 1.30       | 1.31         | -1.27      | 1.12         | -2.13      | -1.62        |
| EPHX4        | epoxide hydrolase 4                  | chr1p22.1            | metabolic process                              | ---                                   | 1.20          | 1.40            | -1.15     | 1.05        | -1.18     | -1.07       | -1.10      | 1.07         | -1.78      | -1.75        | -1.64      | -2.41        |
| EPM2A        | epilepsy, progressive myoclonic      | chr6p24              | carbohydrate metabolic process                 | ---                                   | 1.02          | -1.06           | -1.01     | -1.17       | -1.10     | 1.10        | -1.09      | -1.08        | -1.70      | -1.52        | -1.24      | -1.32        |
| EPM2AIP1     | EPM2A (laforin) interacting protein  | chr3p22.1            | 0                                              | ---                                   | -1.04         | -1.02           | -1.04     | 1.03        | 1.01      | 1.02        | -1.06      | 1.02         | -2.39      | -1.86        | -3.06      | -2.72        |
| EPM2AIP1     | EPM2A (laforin) interacting protein  | chr3p22.1            | 0                                              | ---                                   | 1.09          | -1.04           | 1.02      | 1.11        | 1.06      | 1.20        | -1.23      | -1.14        | -2.16      | -1.58        | -2.42      | -2.47        |
| EPM2AIP1     | EPM2A (laforin) interacting protein  | chr3p22.1            | 0                                              | ---                                   | -1.36         | 1.02            | 1.18      | 1.12        | 1.24      | 1.11        | 1.01       | 1.05         | -1.57      | -1.60        | -1.42      | -1.05        |
| EPOR         | erythropoietin receptor              | chr19p13.3-p13.2     | signal transduction                            | ---                                   | -1.20         | -1.22           | 1.01      | 1.02        | 1.06      | 1.04        | 1.19       | 1.05         | 1.51       | 1.72         | 1.31       | 1.60         |
| EPOR         | erythropoietin receptor              | chr19p13.3-p13.2     | signal transduction                            | ---                                   | -1.05         | -1.23           | 1.24      | 1.05        | 1.13      | 1.64        | 1.15       | 1.15         | 1.09       | 1.23         | 1.40       | 1.38         |
| EPOR         | erythropoietin receptor              | chr19p13.3-p13.2     | signal transduction                            | ---                                   | 1.19          | 1.23            | 1.07      | -1.54       | 1.18      | -1.19       | -1.06      | 1.15         | 1.22       | 1.36         | 1.28       | 1.36         |
| EPPLK1       | epiplakin 1                          | chr8q24.3            | 0                                              | ---                                   | -1.04         | -1.09           | -1.03     | -1.06       | 1.10      | 1.09        | 1.06       | 1.03         | -1.57      | -1.40        | -1.05      | 1.05         |
| EPRS         | glutamyl-prolyl-tRNA synthetase      | chr1q41              | translation                                    | ---                                   | 1.02          | 1.05            | -1.10     | -1.05       | 1.05      | -1.11       | 1.22       | 1.19         | 1.02       | -1.11        | -1.02      | -1.01        |
| EPS15        | epidermal growth factor receptor     | chr1p32              | transport                                      | ---                                   | 1.22          | 1.16            | 1.12      | 1.20        | 1.14      | 1.03        | -1.16      | -1.01        | -1.41      | -1.27        | -1.16      | -1.29        |
| EPS15P1 // E | epidermal growth factor receptor     | ---                  | 0                                              | ---                                   | -1.37         | -1.22           | -1.41     | 2.45        | 1.01      | 1.24        | 2.02       | 1.36         | 2.53       | 1.63         | -1.88      | -1.17        |
| EPSS8        | epidermal growth factor receptor     | chr12p12.3           | signal transduction                            | ---                                   | 1.20          | 1.06            | 1.14      | 1.19        | 1.03      | 1.01        | -1.04      | 1.34         | 1.40       | 1.06         | 1.13       | -1.01        |
| EPSSL1       | EPSS8-like 1                         | chr19q13.42          | phosphorylation                                | ---                                   | -1.05         | -1.07           | 1.12      | 1.25        | -1.03     | -1.50       | -1.04      | 1.14         | 1.91       | 1.30         | 1.52       | 1.45         |
| EPSSL1       | EPSS8-like 1                         | chr19q13.42          | phosphorylation                                | ---                                   | -1.16         | 1.25            | 1.17      | 1.16        | -1.36     | -1.00       | 1.07       | 1.15         | 1.08       | 1.10         | 1.87       | 1.88         |
| EPSSL1       | EPSS8-like 1                         | chr19q13.42          | phosphorylation                                | ---                                   | 1.11          | 1.26            | 1.08      | 1.23        | -1.94     | -1.43       | 1.01       | 1.09         | 1.28       | 1.02         | 1.88       | 1.71         |
| EPSSL1       | EPSS8-like 1                         | chr19q13.42          | phosphorylation                                | ---                                   | -1.26         | -1.06           | -1.10     | 1.22        | 1.30      | 1.28        | -1.02      | 1.44         | 2.87       | 1.81         | 1.97       | 2.17         |
| EPSSL2       | EPSS8-like 2                         | chr11p15.5           | phosphorylation                                | ---                                   | 1.02          | -1.08           | 1.05      | 1.15        | 1.15      | 1.12        | 1.18       | 1.25         | -1.10      | -1.36        | -1.33      | -1.27        |
| EPSTI1       | epithelial stromal interaction       | chr13q13.3           | 0                                              | ---                                   | -3.53         | -1.91           | 2.61      | 1.79        | -2.90     | -1.71       | -1.93      | 2.28         | 3.80       | 1.29         | -1.44      | 1.13         |
| EPT1         | ethanolaminephosphotransferase       | chr2p23.3            | lipid metabolic process                        | ---                                   | 1.26          | 1.21            | 1.09      | 1.05        | -1.10     | -1.07       | -1.18      | -1.13        | -1.33      | -1.18        | -1.27      | -1.24        |
| EPT1         | ethanolaminephosphotransferase       | chr2p23.3            | lipid metabolic process                        | ---                                   | 1.12          | 1.14            | 1.02      | -1.02       | -1.18     | -1.04       | -1.01      | -1.50        | -1.71      | 1.04         | 1.04       | -1.11        |
| EQTN         | equatorin, sperm acrosome            | chr9p21              | endocytosis                                    | ---                                   | -8.62         | -1.23           | 1.06      | 1.78        | -2.02     | 1.08        | -5.96      | -1.26        | -1.48      | 1.43         | -1.40      | 1.33         |
| EQTN         | equatorin, sperm acrosome            | chr9p21              | endocytosis                                    | ---                                   | -2.30         | 1.81            | -1.04     | -7.15       | -1.04     | -1.08       | -2.76      | 1.20         | 1.88       | -1.01        | -1.13      | -1.00        |
| ERAP1        | endoplasmic reticulum aminopeptidase | chr5q15              | angiogenesis                                   | ---                                   | -1.32         | -1.13           | 1.36      | 1.36        | -1.35     | 1.02        | -1.24      | 1.56         | -1.64      | -1.83        | -2.71      | -1.88        |
| ERAP1        | endoplasmic reticulum aminopeptidase | chr5q15              | angiogenesis                                   | ---                                   | -1.03         | -1.12           | -1.02     | -1.02       | -1.04     | -1.07       | -1.27      | -1.13        | -1.17      | -1.12        | -1.54      | -1.50        |
| ERAP1        | endoplasmic reticulum aminopeptidase | chr5q15              | angiogenesis                                   | ---                                   | -1.09         | -1.03           | 1.02      | -1.13       | 1.11      | -1.04       | 1.13       | 1.11         | -1.17      | -1.22        | -1.50      | -1.59        |
| ERAP2        | endoplasmic reticulum aminopeptidase | chr5q15              | antigen processing and presentation of peptide | ---                                   | -1.05         | -1.23           | -1.01     | -1.12       | 1.12      | 1.29        | 1.46       | -1.03        | -1.03      | 1.23         | 1.23       | -1.22        |
| ERBB2        | v-erb-b2 erythroblastic leukemia     | chr17q12             | liver development                              | ---                                   | 1.04          | 1.17            | 1.04      | -1.16       | 1.08      | 1.04        | -1.01      | -1.04        | -1.54      | -1.61        | -1.89      | -1.76        |
| ERBB4        | v-erb-a erythroblastic leukemia      | chr2q33.3-q34        | neural crest cell migration                    | ---                                   | 1.03          | -1.09           | -1.13     | -1.12       | 1.04      | -1.18       | -1.60      | -1.28        | -2.09      | 1.01         | -1.34      | -1.75        |
| ERBB4        | v-erb-a erythroblastic leukemia      | chr2q33.3-q34        | neural crest cell migration                    | ---                                   | 1.49          | 1.19            | 1.03      | -1.09       | 1.25      | 1.18        | 1.15       | 1.02         | -2.10      | -1.92        | -1.92      | -1.82        |
| ERCC1        | excision repair cross-complement     | chr19q13.32          | nucleotide-excision repair, DNA damage         | ---                                   | 1.03          | 1.02            | 1.03      | 1.06        | 1.05      | -1.01       | 1.00       | 1.07         | -1.18      | -1.05        | -1.99      | -1.72        |
| ERCC1        | excision repair cross-complement     | chr19q13.32          | nucleotide-excision repair, DNA damage         | ---                                   | -1.07         | -1.07           | 1.03      | 1.06        | -1.00     | -1.04       | 1.15       | 1.09         | -1.01      | -1.09        | -1.37      | -1.34        |
| ERCC1        | excision repair cross-complement     | chr19q13.32          | nucleotide-excision repair, DNA damage         | ---                                   | 1.09          | -1.03           | -1.10     | 1.09        | -1.08     | -1.18       | 1.13       | 1.18         | -1.02      | -1.20        | -1.47      | -1.37        |
| ERCC2        | excision repair cross-complement     | chr19q13.3           | cell cycle checkpoint                          | RNA_transcription_Reactome // GenMAPP | 1.23          | 1.04            | 1.04      | 1.01        | 1.20      | 1.12        | 1.56       | 1.61         | 1.62       | 1.18         | 1.34       | 1.28         |
| ERCC4        | excision repair cross-complement     | chr16p13.12          | meiotic mismatch repair                        | ---                                   | 1.07          | 1.03            | -1.03     | 1.00        | -1.03     | 1.08        | -1.32      | -1.29        | -1.23      | -1.14        | 1.40       | 1.04         |
| ERCC5        | excision repair cross-complement     | chr13q33             | nucleotide-excision repair, DNA damage         | ---                                   | 1.04          | 1.14            | -1.01     | 1.11        | 1.19      | 1.03        | 1.16       | 1.08         | 1.48       | 1.19         | 1.54       | 1.42         |
| ERCC6        | excision repair cross-complement     | chr10q11.23          | response to superoxide                         | ---                                   | -1.07         | -1.05           | -1.05     | -1.21       | 1.01      | 1.11        | -1.07      | 1.02         | -2.94      | -2.23        | -1.60      | -1.82        |
| ERCC6L2      | excision repair cross-complement     | chr9q22.32           | DNA repair                                     | ---                                   | -1.01         | -1.05           | -1.01     | -1.05       | 1.12      | 1.00        | -1.26      | -1.12        | -1.97      | -1.60        | -1.74      | -1.79        |
| ERCC6L2      | excision repair cross-complement     | chr9q22.32           | DNA repair                                     | ---                                   | 1.03          | 1.02            | 1.11      | -1.19       | 1.20      | -1.03       | -1.05      | 1.11         | -1.70      | -1.60        | -1.92      | -1.86        |
| ERCC6-PGB    | ERCC6-PGBD3 readthrough              | chr10q11             | response to superoxide                         | ---                                   | -1.38         | -1.42           | -1.02     | -1.16       | -1.03     | -1.25       | 1.17       | 1.34         | -1.86      | -1.72        | -1.51      | -1.30        |

| ID          | Gene Title                    | Chromosomal Location | 1st Gene Ontology Biological Process      | Pathway                              | A2497 30 mins | A2497P' 30 mins | A2497 2 h | A2497P' 2 h | A2497 4 h | A2497P' 4 h | A2497 24 h | A2497P' 24 h | A2497 48 h | A2497P' 48 h | A2497 72 h | A2497P' 72 h |
|-------------|-------------------------------|----------------------|-------------------------------------------|--------------------------------------|---------------|-----------------|-----------|-------------|-----------|-------------|------------|--------------|------------|--------------|------------|--------------|
| ERCC8       | excision repair cross-compl   | chr5q12.1            | protein polyubiquitination                | ---                                  | -1.20         | -1.08           | -1.02     | 1.04        | -1.03     | -1.13       | 1.15       | 1.08         | 1.69       | 1.57         | 1.49       | 1.39         |
| ERCC8       | excision repair cross-compl   | chr5q12.1            | protein polyubiquitination                | ---                                  | 1.01          | -1.10           | -1.12     | -1.03       | 1.07      | -1.17       | 1.06       | -1.06        | 1.39       | 1.67         | 1.27       | 1.36         |
| ERCC8       | excision repair cross-compl   | chr5q12.1            | protein polyubiquitination                | ---                                  | 1.02          | -1.02           | 1.03      | -1.09       | -1.04     | 1.05        | -1.11      | -1.04        | -1.91      | -1.67        | -1.80      | -1.89        |
| EREG        | epiregulin                    | chr4q13.3            | angiogenesis                              | ---                                  | 1.27          | 1.13            | -1.13     | -1.27       | -1.10     | 1.08        | 1.07       | 9.33         | 5.68       | 8.50         | 4.27       |              |
| ERG         | v-ets erythroblastosis virus  | chr21q22.3           | transcription, DNA-dependent              | ---                                  | -2.09         | -1.29           | -1.20     | -1.26       | 1.63      | 1.01        | -1.08      | 1.53         | -1.78      | -1.83        | -3.39      | -2.05        |
| ERGIC1      | endoplasmic reticulum golgi   | chr5q35.1            | transport                                 | ---                                  | -1.10         | -1.04           | -1.07     | 1.02        | -1.03     | -1.01       | 1.02       | 1.01         | 1.21       | 1.12         | -1.08      | -1.04        |
| ERGIC2      | ERGIC and golgi 2             | chr12p11.22          | transport                                 | ---                                  | 1.01          | 1.03            | 1.09      | 1.00        | -1.02     | 1.04        | 1.01       | 1.09         | 1.17       | 1.19         | 1.25       | 1.20         |
| ERGIC2      | ERGIC and golgi 2             | chr12p11.22          | transport                                 | ---                                  | -1.07         | -1.02           | -1.04     | -1.06       | -1.09     | 1.02        | -1.52      | -1.17        | 1.03       | 1.30         | 1.28       | 1.15         |
| ERGIC2      | ERGIC and golgi 2             | chr12p11.22          | transport                                 | ---                                  | 1.02          | 1.01            | 1.02      | 1.05        | -1.06     | -1.01       | 1.03       | 1.15         | 1.20       | 1.25         | 1.26       | 1.24         |
| ERGIC3      | ERGIC and golgi 3             | chr20pter-q12        | transport                                 | ---                                  | 2.99          | 1.14            | 1.30      | 2.01        | 3.46      | 1.12        | 1.25       | -1.62        | -1.50      | -1.20        | -2.48      | -1.30        |
| ERH         | enhancer of rudimentary ho    | chr14q24.1/7q34      | nucleobase-containing compound metabo     | ---                                  | -1.02         | 1.06            | 1.01      | 1.00        | -1.02     | -1.03       | -1.10      | -1.08        | -1.02      | -1.03        | 1.03       | -1.04        |
| ERH1        | exoribonuclease 1             | chr8p23.1            | rRNA processing                           | ---                                  | 1.06          | 1.14            | 1.04      | -1.16       | -1.04     | -1.06       | -1.11      | -1.06        | -1.75      | -1.51        | -1.42      | -1.52        |
| ERLEC1      | endoplasmic reticulum lect    | chr2p16.2            | ER-associated protein catabolic process   | ---                                  | -1.02         | -1.58           | 1.18      | 1.11        | -1.78     | -1.24       | 1.17       | -1.61        | -1.47      | -1.29        | 1.13       | 1.89         |
| ERLEC1      | endoplasmic reticulum lect    | chr2p16.2            | ER-associated protein catabolic process   | ---                                  | 1.02          | -1.00           | -1.08     | -1.05       | -1.01     | 1.02        | -1.05      | -1.04        | 1.07       | 1.07         | 1.45       | 1.35         |
| ERLEC1      | endoplasmic reticulum lect    | chr2p16.2            | ER-associated protein catabolic process   | ---                                  | 1.01          | 1.00            | -1.11     | -1.10       | -1.03     | -1.06       | -1.00      | 1.03         | 1.19       | 1.34         | 1.73       | 1.89         |
| ERLIN1      | ER lipid raft associated 1    | chr10q21-q22         | ER-associated protein catabolic process   | ---                                  | -1.04         | 1.08            | 1.00      | -1.10       | -1.09     | -1.17       | -1.03      | 1.06         | 1.00       | 1.05         | 1.09       | 1.13         |
| ERLIN1      | ER lipid raft associated 1    | chr10q21-q22         | ER-associated protein catabolic process   | ---                                  | -1.26         | -1.35           | -1.16     | 1.14        | -1.04     | 1.06        | -1.06      | -1.43        | -1.03      | 1.01         | 1.34       | 1.71         |
| ERLIN2      | ER lipid raft associated 2    | chr8p11.2            | cell death                                | ---                                  | -1.10         | -1.09           | -1.13     | 1.00        | -1.19     | -1.08       | -1.01      | 1.03         | -1.30      | -1.10        | -2.14      | -2.09        |
| ERMAP       | erythroblast membrane-ass     | chr1p34.2            | 0                                         | ---                                  | 1.13          | 1.09            | 1.02      | 1.03        | 1.02      | -1.01       | 1.21       | 1.01         | -1.63      | -1.46        | -1.67      | -1.45        |
| ERMP1       | endoplasmic reticulum met     | chr9p24              | ovarian follicle development              | ---                                  | -1.07         | -1.04           | -1.04     | 1.02        | -1.10     | 1.05        | 1.01       | -1.01        | -1.04      | 1.08         | -1.20      | 1.14         |
| ERMP1       | endoplasmic reticulum met     | chr9p24              | ovarian follicle development              | ---                                  | -1.01         | -1.04           | 1.10      | 1.10        | 1.13      | 1.03        | 1.14       | -1.02        | -1.32      | -1.00        | -1.27      | -1.21        |
| ERN1        | endoplasmic reticulum to      | chr17q24.2           | transcription, DNA-dependent              | ---                                  | 1.04          | 1.05            | 1.05      | -1.18       | 1.21      | 1.17        | 1.14       | -1.11        | 2.16       | 1.78         | 1.72       | 1.39         |
| ERO1L       | ERO1-like (S. cerevisiae)     | chr14q22.1           | protein folding                           | ---                                  | 1.01          | 1.08            | -1.04     | -1.06       | 1.07      | 1.10        | 1.20       | 1.03         | 1.63       | 1.90         | 1.81       | 1.95         |
| ERO1L       | ERO1-like (S. cerevisiae)     | chr14q22.1           | protein folding                           | ---                                  | 1.06          | 1.04            | -1.00     | 1.03        | -1.05     | 1.07        | 1.09       | 1.03         | 1.52       | 1.58         | 2.13       | 2.18         |
| ERO1L       | ERO1-like (S. cerevisiae)     | chr14q22.1           | protein folding                           | ---                                  | -1.03         | 1.05            | 1.06      | -1.11       | -1.03     | -1.05       | 1.08       | -1.04        | 1.53       | 1.66         | 1.51       | 1.54         |
| ERO1LB      | ERO1-like beta (S. cerevisi   | chr1q42.2-q43        | protein folding                           | ---                                  | 1.15          | 1.24            | -1.43     | -1.34       | -1.19     | 1.18        | -1.16      | 1.09         | 1.07       | 1.05         | 1.57       | 1.21         |
| ERP44       | endoplasmic reticulum prot    | chr9q31.1            | protein folding                           | ---                                  | -1.06         | -1.04           | -1.07     | -1.09       | -1.02     | -1.07       | -1.03      | -1.05        | 1.26       | 1.24         | 1.37       | 1.54         |
| ERRF1       | ERBB receptor feedback in     | chr1p36              | response to stress                        | ---                                  | 1.32          | 1.45            | 1.00      | -1.14       | 1.08      | 1.05        | 1.40       | 1.25         | 2.95       | 3.13         | 3.84       | 3.28         |
| ERVH-6      | endogenous retrovirus grou    | chrYq11.223          | 0                                         | ---                                  | -1.54         | -1.84           | 1.24      | -1.09       | 1.24      | 1.03        | 1.63       | 1.81         | -1.70      | -1.27        | -1.29      | -1.87        |
| ERVK13-1 // | endogenous retrovirus grou    | chr16p13.3           | 0                                         | ---                                  | 1.15          | -1.06           | -1.27     | 1.23        | 1.81      | 1.22        | -1.32      | 1.11         | -1.78      | -3.94        | -2.22      | -2.24        |
| ERVMER34    | endogenous retrovirus grou    | chr4q12              | 0                                         | ---                                  | -1.43         | -1.45           | -1.19     | -1.32       | 1.42      | 1.02        | 1.32       | 1.03         | -1.06      | -1.04        | -1.63      | -2.10        |
| ERVW-1      | endogenous retrovirus grou    | chr7q21.2            | syncytium formation                       | ---                                  | 1.42          | 2.04            | -1.17     | 1.20        | -1.01     | -1.18       | 1.22       | -1.01        | -1.23      | 1.12         | -1.86      | -2.92        |
| ERVW-1      | endogenous retrovirus grou    | chr7q21.2            | syncytium formation                       | ---                                  | -1.14         | -1.04           | -1.02     | 1.35        | 1.77      | -1.36       | 1.00       | -1.78        | -1.92      | -1.55        | -1.78      |              |
| ESCO1       | establishment of sister chro  | chr18q11.2           | mitotic cell cycle                        | ---                                  | 1.00          | 1.04            | -1.06     | 1.06        | -1.04     | 1.03        | 1.02       | -1.00        | -1.02      | 1.10         | 1.22       | 1.14         |
| ESD         | esterase D                    | chr13q14.1-q14.2     | proteolysis                               | ---                                  | -1.11         | -1.06           | -1.08     | 1.01        | -1.01     | 1.02        | -1.03      | -1.00        | -1.09      | 1.00         | -1.27      | -1.10        |
| ESD         | esterase D                    | chr13q14.1-q14.2     | proteolysis                               | ---                                  | -1.04         | -1.02           | -1.04     | -1.01       | 1.02      | 1.01        | 1.05       | -1.04        | -1.10      | -1.09        | -1.18      | -1.12        |
| ESD         | esterase D                    | chr13q14.1-q14.2     | formaldehyde catabolic process            | ---                                  | -1.01         | -1.03           | 1.06      | 1.04        | 1.10      | -1.05       | 1.06       | -1.06        | -1.44      | -1.27        | -1.70      | -1.92        |
| ESF1        | ESF1, nucleolar pre-rRNA      | chr20p12.1           | transcription, DNA-dependent              | ---                                  | -1.02         | -1.04           | -1.05     | 1.04        | 1.10      | 1.13        | 1.14       | 1.13         | 1.14       | 1.13         | 1.40       | 1.58         |
| ESR1        | estrogen receptor 1           | chr6q25.1            | antral ovarian follicle growth            | Nuclear_Receptors // GenMAPP         | -2.58         | -9.03           | -1.36     | -1.36       | -1.47     | 1.61        | -2.71      | -1.06        | -1.73      | -3.69        | -1.39      | 2.39         |
| ESRP1       | epithelial splicing regulator | chr8q22.1            | mRNA processing                           | ---                                  | -2.57         | 1.26            | -1.43     | -1.06       | -1.71     | 1.07        | 5.03       | 1.83         | 4.33       | 4.18         | 2.30       | 11.19        |
| ESRRA       | estrogen-related receptor al  | chr11q13             | transcription, DNA-dependent              | Nuclear_Receptors // GenMAPP         | -1.11         | -1.13           | -1.02     | 1.02        | -1.09     | -1.04       | 1.10       | 1.08         | 1.21       | 1.09         | 1.10       | -1.02        |
| ESYT1       | extended synaptotagmin-lik    | chr12q13.2           | 0                                         | ---                                  | -1.14         | -1.15           | -1.03     | -1.05       | -1.03     | -1.02       | -1.04      | -1.00        | 1.04       | 1.08         | -1.19      | -1.06        |
| ESYT2       | extended synaptotagmin-lik    | chr7q36.3            | 0                                         | ---                                  | -1.03         | 1.04            | 1.04      | 1.06        | -1.06     | 1.03        | -1.13      | -1.02        | -1.29      | -1.04        | -1.38      | -1.18        |
| ESYT2       | extended synaptotagmin-lik    | chr7q36.3            | 0                                         | ---                                  | 1.03          | -1.00           | 1.01      | 1.10        | -1.05     | 1.06        | -1.03      | 1.01         | -1.01      | 1.20         | 1.30       | 1.30         |
| ESYT2       | extended synaptotagmin-lik    | chr7q36.3            | 0                                         | ---                                  | -1.01         | -1.04           | 1.30      | 1.07        | -1.13     | -1.04       | 1.37       | 1.24         | -1.86      | -1.38        | -1.87      | -1.85        |
| ETF1        | eukaryotic translation termi  | chr5q31.1            | nuclear-transcribed mRNA catabolic pro    | Translation_Factors // GenMAPP       | 1.06          | 1.09            | -1.01     | 1.04        | 1.01      | -1.02       | 1.00       | -1.07        | -1.09      | -1.14        | 1.01       | -1.16        |
| ETHE1       | ethylmalonic encephalopat     | chr19q13.31          | sulfur amino acid metabolic process       | ---                                  | -1.23         | -1.39           | -1.12     | -1.14       | 1.09      | -1.03       | 1.11       | 1.02         | 1.46       | 1.50         | 1.14       | 1.31         |
| ETNK1       | ethanolamine kinase 1         | chr12p12.1           | lipid metabolic process                   | ---                                  | 1.04          | 1.01            | 1.23      | 1.15        | -1.07     | 1.12        | -1.13      | -1.25        | 1.13       | 1.18         | 1.41       | -1.03        |
| ETNK1       | ethanolamine kinase 1         | chr12p12.1           | lipid metabolic process                   | ---                                  | 1.16          | 1.16            | 1.08      | -1.14       | -1.04     | -1.22       | 1.17       | -1.02        | 1.53       | 1.25         | 1.51       | -1.11        |
| ETNK1       | ethanolamine kinase 1         | chr12p12.1           | lipid metabolic process                   | ---                                  | 1.12          | 1.02            | 1.33      | 1.46        | -1.13     | 1.20        | -1.28      | -1.29        | 1.14       | 1.13         | 1.27       | 1.09         |
| ETNK1       | ethanolamine kinase 1         | chr12p12.1           | lipid metabolic process                   | ---                                  | 1.77          | 1.49            | 1.01      | -1.04       | -1.05     | 1.22        | -1.30      | 1.34         | -1.73      | -1.86        | -1.78      | -2.00        |
| ETNK1       | ethanolamine kinase 1         | chr12p12.1           | lipid metabolic process                   | ---                                  | 1.21          | 1.13            | 1.01      | 1.19        | -1.36     | -1.13       | -1.07      | -1.03        | 1.12       | 1.34         | 1.62       | 1.52         |
| ETNPPL      | ethanolamine-phosphate ph     | chr4q25              | cellular amino acid metabolic process     | ---                                  | -1.04         | -1.02           | -1.01     | -1.04       | 1.03      | -1.05       | 1.14       | -1.03        | -1.99      | -1.85        | -2.77      | -2.85        |
| ETS1        | v-ets erythroblastosis virus  | chr11q23.3           | response to hypoxia                       | ---                                  | 1.11          | -1.21           | -1.05     | -1.12       | -1.06     | 1.03        | -1.91      | -1.86        | 1.25       | 1.38         | 2.01       | 1.32         |
| ETS1        | v-ets erythroblastosis virus  | chr11q23.3           | response to hypoxia                       | ---                                  | 1.10          | 1.06            | -1.03     | -1.09       | -1.15     | 1.02        | -1.23      | 1.05         | 1.07       | 1.18         | 1.49       | 1.31         |
| ETS2        | v-ets erythroblastosis virus  | chr21q22.2           | skeletal system development               | Smooth_muscle_contraction // GenMAPP | 1.05          | 1.05            | -1.05     | 1.10        | -1.07     | -1.03       | 1.17       | 1.05         | 1.50       | 1.41         | 1.50       | 1.56         |
| ETV1        | ets variant 1                 | chr7p21.3            | transcription, DNA-dependent              | ---                                  | -1.17         | -1.44           | -1.05     | -1.44       | 1.15      | 1.31        | 1.00       | -1.11        | -1.35      | -1.25        | -1.46      | -1.33        |
| ETV4        | ets variant 4                 | chr17q21             | transcription, DNA-dependent              | ---                                  | -1.26         | 1.15            | 1.14      | 1.17        | 1.38      | 1.64        | 1.02       | 1.07         | 1.39       | 1.04         | 1.40       | 1.23         |
| ETV4        | ets variant 4                 | chr17q21             | transcription, DNA-dependent              | ---                                  | 1.18          | 1.43            | 1.09      | -1.24       | 1.40      | -1.15       | 1.57       | 1.65         | 1.75       | 1.75         | 1.20       | 1.27         |
| ETV5        | ets variant 5                 | chr3q28              | neuromuscular synaptic transmission       | ---                                  | -1.02         | -1.06           | 1.61      | 2.31        | -1.52     | -1.24       | 1.35       | -1.00        | 1.93       | 1.40         | -1.32      | -1.12        |
| ETV5        | ets variant 5                 | chr3q28              | regulation of transcription, DNA-depend   | ---                                  | 1.49          | 1.26            | -1.10     | -1.25       | 1.16      | 1.23        | 1.36       | 1.20         | -1.01      | -1.01        | 1.27       | 1.01         |
| ETV5        | ets variant 5                 | chr3q28              | neuromuscular synaptic transmission       | ---                                  | 1.01          | 1.24            | 1.01      | -1.30       | 1.17      | 1.12        | 1.66       | 1.33         | 1.29       | 1.10         | 1.17       | -1.08        |
| ETV6        | ets variant 6                 | chr12p13             | transcription, DNA-dependent              | Circadian_Exercise // GenMAPP        | 1.02          | -1.04           | 1.04      | 1.01        | 1.09      | 1.07        | 1.05       | 1.07         | 1.44       | 1.17         | 1.05       | 1.15         |
| ETV6        | ets variant 6                 | chr12p13             | negative regulation of transcription from | Circadian_Exercise // GenMAPP        | -1.02         | -1.15           | 1.10      | 1.11        | 1.42      | 1.18        | 1.20       | -1.28        | 2.54       | 1.80         | 1.50       | 1.48         |
| EVA1C       | eva-1 homolog C (C. elegan    | chr21q22.11          | 0                                         | ---                                  | 1.19          | 1.04            | 1.01      | 1.18        | 1.13      | 1.05        | 1.49       | 1.20         | 1.77       | 1.17         | 1.17       | 1.03         |
| EVC         | Ellis van Creveld syndrome    | chr4p16              | skeletal system development               | ---                                  | 1.61          | 1.31            | -1.09     | -1.06       | 1.13      | -1.23       | 1.12       | -1.13        | -3.46      | -3.08        | -1.82      | -2.05        |

| ID             | Gene Title                                 | Chromosomal Location | 1st Gene Ontology Biological Process                  | Pathway                                   | A2497 30 mins | A2497P' 30 mins | A2497 2 h | A2497P' 2 h | A2497 4 h | A2497P' 4 h | A2497 24 h | A2497P' 24 h | A2497 48 h | A2497P' 48 h | A2497 72 h | A2497P' 72 h |
|----------------|--------------------------------------------|----------------------|-------------------------------------------------------|-------------------------------------------|---------------|-----------------|-----------|-------------|-----------|-------------|------------|--------------|------------|--------------|------------|--------------|
| EVL            | Enah/Vasp-like                             | chr14q32.2           | actin filament organization                           | ---                                       | -1.10         | -1.02           | -1.13     | -1.25       | -1.28     | -1.20       | 1.04       | 1.04         | 1.42       | 1.23         | 1.40       | 1.76         |
| EWSR1          | EWS RNA-binding protein                    | chr22q12.2           | transcription, DNA-dependent                          | ---                                       | 1.30          | 1.15            | 1.18      | 1.04        | -1.22     | 1.09        | -1.16      | -1.27        | -3.22      | -2.51        | -1.93      | -2.30        |
| EWSR1          | EWS RNA-binding protein                    | chr22q12.2           | transcription, DNA-dependent                          | ---                                       | 1.18          | 1.20            | 1.08      | -1.00       | -1.04     | 1.04        | 1.02       | -1.08        | -2.03      | -2.30        | -1.35      | -1.49        |
| EWSR1          | EWS RNA-binding protein                    | chr22q12.2           | transcription, DNA-dependent                          | ---                                       | 1.06          | -1.02           | 1.17      | 1.11        | -1.08     | -1.04       | -1.15      | -1.16        | -1.47      | -1.72        | -1.51      | -1.92        |
| EXD2           | exonuclease 3'-5' domain c                 | chr14q24.1           | nucleobase-containing compound metabo                 | ---                                       | 1.07          | 1.13            | 1.04      | -1.00       | -1.06     | -1.01       | -1.20      | -1.18        | -1.72      | -1.54        | -1.31      | -1.29        |
| EXD2           | exonuclease 3'-5' domain c                 | chr14q24.1           | nucleobase-containing compound metabo                 | ---                                       | -1.05         | -1.05           | 1.06      | -1.16       | -1.27     | -1.24       | -1.52      | -1.59        | 1.19       | -1.70        | 1.50       | 1.73         |
| EXD3           | exonuclease 3'-5' domain c                 | chr9q34.3            | nucleobase-containing compound metabo                 | ---                                       | 1.00          | 1.04            | 2.72      | 1.06        | -5.69     | -1.61       | 1.28       | 2.07         | 2.05       | -1.33        | 1.39       | 1.02         |
| EXD3           | exonuclease 3'-5' domain c                 | chr9q34.3            | nucleobase-containing compound metabo                 | ---                                       | -1.44         | -2.74           | 1.48      | 1.23        | -1.02     | -1.24       | 1.68       | 1.17         | 1.42       | 1.25         | 1.17       | 1.26         |
| EXD3           | exonuclease 3'-5' domain c                 | chr9q34.3            | nucleobase-containing compound metabo                 | ---                                       | -1.03         | -1.09           | -1.19     | -1.00       | -1.12     | -1.18       | 1.01       | 1.12         | -2.06      | -1.73        | -1.46      | -1.52        |
| EXO1           | exonuclease 1                              | chr1q42-q43          | humoral immune response mediated by c                 | ---                                       | 1.11          | -1.00           | 1.02      | -1.02       | 1.06      | 1.10        | -1.09      | -1.08        | -1.20      | -1.15        | -1.31      | -1.15        |
| EXO5           | exonuclease 5                              | chr1p34.2            | DNA repair                                            | ---                                       | -1.01         | -1.09           | -1.13     | -1.03       | 1.21      | -1.09       | -1.22      | -1.11        | -1.50      | -1.79        | -1.57      | -1.22        |
| EXO5           | exonuclease 5                              | chr1p34.2            | DNA repair                                            | ---                                       | -1.06         | -1.22           | 1.11      | 1.35        | 1.27      | 1.28        | -1.31      | -1.44        | -2.47      | -1.94        | -1.31      | -1.96        |
| EXOC2          | exocyst complex component                  | chr6p25.3            | transport                                             | ---                                       | -1.01         | -1.11           | 1.02      | -1.06       | 1.22      | 1.20        | -1.14      | -1.30        | -1.90      | -1.72        | -1.38      | -1.53        |
| EXOC2          | exocyst complex component                  | chr6p25.3            | transport                                             | ---                                       | -1.15         | -1.22           | 1.19      | 1.18        | 1.09      | 1.09        | 1.47       | 1.16         | -1.01      | 1.03         | 1.53       | 1.58         |
| EXOC3          | exocyst complex component                  | chr5p15.33           | transport                                             | ---                                       | 1.04          | -1.06           | 1.02      | 1.21        | 1.10      | 1.09        | -1.27      | -1.09        | -1.71      | -1.66        | -1.18      | -1.21        |
| EXOC4          | exocyst complex component                  | chr7q31              | transport                                             | ---                                       | 1.54          | 1.68            | 1.15      | 1.06        | 1.22      | 1.25        | 1.42       | 1.30         | 1.38       | 1.06         | 1.37       | 1.47         |
| EXOC6          | exocyst complex component                  | chr10q23.33          | transport                                             | ---                                       | -1.02         | -1.03           | 1.01      | -1.03       | 1.07      | 1.10        | -1.15      | -1.09        | -1.45      | -1.36        | -1.45      | -1.70        |
| EXOC6B         | exocyst complex component                  | chr2p13.2            | transport                                             | ---                                       | 1.06          | 1.07            | 1.13      | 1.07        | 1.18      | -1.14       | -1.04      | -1.06        | -1.55      | -1.38        | -1.41      | -1.53        |
| EXOC7          | exocyst complex component                  | chr17q25.1           | transport                                             | ---                                       | 1.46          | 1.21            | 1.30      | 1.42        | -1.05     | -1.11       | 1.52       | 1.33         | -1.53      | -1.49        | -3.29      | -1.87        |
| EXOC7          | exocyst complex component                  | chr17q25.1           | transport                                             | ---                                       | 1.01          | 1.25            | -1.21     | -1.07       | 1.29      | 1.08        | 1.01       | -1.04        | -1.68      | -1.43        | -1.58      | -1.10        |
| EXOC7          | exocyst complex component                  | chr17q25.1           | transport                                             | ---                                       | 1.17          | 1.03            | 1.00      | 1.25        | -1.05     | -1.10       | 1.11       | 1.20         | -1.41      | -1.53        | -1.71      | -1.50        |
| EXOC8          | exocyst complex component                  | chr1q42.2            | transport                                             | ---                                       | 1.11          | 1.01            | -1.01     | 1.02        | -1.01     | 1.02        | -1.02      | -1.04        | -1.51      | -1.47        | -1.02      | -1.24        |
| EXOG           | endo/exonuclease (5'-3')                   | chr3p21.3            | nucleic acid phosphodiester bond hydroly              | ---                                       | 1.14          | 1.24            | 1.09      | 1.03        | 1.07      | 1.14        | -1.14      | -1.23        | -1.81      | -2.35        | -3.23      | -4.32        |
| EXOSC1         | exosome component 1                        | chr10q24             | nuclear-transcribed mRNA catabolic pro                | ---                                       | -1.09         | -1.14           | -1.07     | -1.04       | 1.05      | -1.08       | 1.02       | -1.09        | 1.25       | 1.09         | 1.17       | 1.30         |
| EXOSC2         | exosome component 2                        | chr9q34              | nuclear-transcribed mRNA catabolic pro                | ---                                       | -1.03         | -1.00           | 1.05      | 1.17        | -1.01     | -1.07       | 1.25       | 1.24         | -1.40      | -1.61        | -1.52      | -1.55        |
| EXOSC3         | exosome component 3                        | chr9p11              | nuclear-transcribed mRNA catabolic pro                | ---                                       | 1.03          | -1.01           | -1.02     | 1.04        | -1.14     | 1.00        | 1.14       | 1.09         | 1.33       | 1.24         | 1.03       | 1.14         |
| EXOSC3         | exosome component 3                        | chr9p11              | nuclear-transcribed mRNA catabolic pro                | ---                                       | 1.04          | 1.00            | -1.04     | 1.00        | -1.07     | -1.06       | 1.09       | 1.10         | 1.36       | 1.25         | 1.18       | 1.31         |
| EXOSC3         | exosome component 3                        | chr9p11              | nuclear-transcribed mRNA catabolic pro                | ---                                       | 1.08          | 1.06            | -1.06     | -1.06       | -1.03     | 1.05        | 1.11       | 1.12         | 1.44       | 1.28         | 1.23       | 1.35         |
| EXOSC3         | exosome component 3                        | chr9p11              | nuclear-transcribed mRNA catabolic pro                | ---                                       | 1.06          | 1.11            | -1.03     | 1.03        | 1.01      | 1.06        | 1.13       | 1.24         | 1.39       | 1.27         | 1.18       | 1.24         |
| EXOSC4         | exosome component 4                        | chr8q24.3            | nuclear-transcribed mRNA catabolic pro                | ---                                       | -1.05         | 1.03            | -1.06     | -1.11       | 1.10      | -1.11       | 1.18       | 1.02         | -1.57      | -1.81        | -1.32      | -1.70        |
| EXOSC4         | exosome component 4                        | chr8q24.3            | nuclear-transcribed mRNA catabolic pro                | ---                                       | 1.10          | 1.06            | 1.08      | 1.16        | 1.18      | -1.10       | 1.20       | 1.16         | -1.04      | -1.50        | -1.35      | -1.50        |
| EXOSC4         | exosome component 4                        | chr8q24.3            | nuclear-transcribed mRNA catabolic pro                | ---                                       | 1.05          | 1.01            | -1.02     | 1.08        | -1.03     | -1.11       | 1.13       | 1.13         | -1.31      | -1.61        | -1.45      | -1.51        |
| EXOSC5         | exosome component 5                        | chr19q13.1           | nuclear-transcribed mRNA catabolic pro                | ---                                       | -1.02         | -1.03           | 1.10      | 1.28        | -1.03     | -1.07       | 1.31       | 1.11         | 1.14       | 1.13         | 1.50       | 1.68         |
| EXOSC6         | NULL                                       | ---                  | nuclear-transcribed mRNA catabolic pro                | ---                                       | 1.06          | 1.10            | 1.10      | -1.01       | 1.14      | 1.24        | -1.13      | 1.04         | -1.45      | -1.30        | -1.89      | -2.04        |
| EXOSC6         | exosome component 6                        | chr16q22.1           | nuclear-transcribed mRNA catabolic pro                | ---                                       | -1.13         | -1.09           | 1.09      | 1.01        | -1.05     | 1.07        | -1.20      | -1.05        | -2.75      | -1.93        | -2.56      | -2.87        |
| EXOSC7         | exosome component 7                        | chr3p21.31           | nuclear-transcribed mRNA catabolic pro                | ---                                       | -1.16         | -1.12           | 1.07      | 1.23        | 1.08      | -1.02       | 1.01       | 1.25         | -1.03      | -1.22        | -1.40      | -1.18        |
| EXOSC7         | exosome component 7                        | chr3p21.31           | nuclear-transcribed mRNA catabolic pro                | ---                                       | -1.04         | 1.08            | 1.03      | -1.10       | 1.02      | -1.04       | 1.20       | 1.17         | 1.31       | 1.29         | 1.50       | 1.54         |
| EXPH5          | exophilin 5                                | chr11q22.3           | keratinocyte development                              | ---                                       | -1.23         | -1.10           | -1.41     | -1.20       | -1.15     | -1.32       | -1.36      | -1.06        | -1.78      | -1.20        | -1.31      | -1.47        |
| EXT1           | exostosin glycosyltransferase              | chr8q24.11           | skeletal system development                           | ---                                       | 1.00          | 1.04            | 1.06      | -1.19       | 1.10      | 1.00        | 1.36       | 1.15         | 1.56       | 1.41         | 2.05       | 1.84         |
| EXT2           | exostosin glycosyltransferase              | chr11p12-p11         | ossification                                          | ---                                       | 1.05          | -1.01           | 1.03      | -1.07       | -1.05     | -1.11       | 1.08       | 1.15         | 1.07       | 1.12         | 1.21       | 1.23         |
| EXTL2          | exostosin-like glycosyltransferase         | chr1p21              | N-acetylglucosamine metabolic process                 | ---                                       | 1.05          | 1.10            | 1.09      | 1.06        | 1.18      | 1.13        | -1.12      | -1.17        | -2.01      | -1.80        | -1.77      | -2.08        |
| EYA2           | eyes absent homolog 2 (Drosophila)         | chr20q13.1           | DNA repair                                            | ---                                       | 2.29          | 1.06            | 1.36      | 1.24        | -1.72     | -1.08       | 2.01       | 1.84         | -1.04      | -1.18        | 5.11       | 2.44         |
| EYA3           | eyes absent homolog 3 (Drosophila)         | chr1p36              | DNA repair                                            | ---                                       | -1.32         | -1.35           | -1.03     | -1.03       | -1.41     | -1.04       | -1.23      | 1.06         | 1.91       | 1.98         | 1.70       | 1.95         |
| EYA3           | eyes absent homolog 3 (Drosophila)         | chr1p36              | DNA repair                                            | ---                                       | 1.34          | -1.65           | -1.27     | 1.09        | 1.36      | 1.24        | -1.32      | -1.01        | 2.96       | 2.96         | 2.05       | 2.43         |
| EYA4           | eyes absent homolog 4 (Drosophila)         | chr6q23              | DNA repair                                            | ---                                       | 1.03          | 1.04            | 1.02      | -1.03       | -1.03     | -1.05       | 1.04       | -1.06        | -1.30      | -1.29        | -1.24      | -1.35        |
| EYA4           | eyes absent homolog 4 (Drosophila)         | chr6q23              | DNA repair                                            | ---                                       | -1.04         | -1.01           | 1.04      | -1.05       | 1.03      | -1.00       | -1.12      | -1.14        | -1.59      | -1.40        | -1.41      | -1.55        |
| EZH1           | enhancer of zeste homolog                  | chr17q21.1-q21.3     | negative regulation of transcription from             | ---                                       | 1.59          | 1.43            | -1.32     | -1.20       | 1.10      | 1.20        | -1.16      | -1.26        | 1.43       | 1.59         | 1.21       | 1.05         |
| EZH1           | enhancer of zeste homolog                  | chr17q21.1-q21.3     | negative regulation of transcription from             | ---                                       | -1.21         | -1.04           | -1.25     | -1.12       | -1.19     | -1.09       | 1.16       | 1.06         | -1.06      | 1.05         | 1.14       | -1.04        |
| EZH2           | enhancer of zeste homolog                  | chr7q35-q36          | S phase of mitotic cell cycle                         | ---                                       | -1.02         | -1.02           | 1.04      | 1.01        | 1.00      | 1.02        | -1.08      | -1.03        | -1.45      | -1.40        | -1.81      | -1.81        |
| EZR            | ezrin                                      | chr6q25.3            | cytoskeletal anchoring at plasma membrane             | ---                                       | -1.14         | -1.11           | -1.10     | -1.06       | -1.06     | -1.24       | 1.08       | -1.03        | 1.29       | 1.03         | 1.35       | 1.28         |
| F11R           | F11 receptor                               | chr1q21.2-q21.3      | inflammatory response                                 | ---                                       | 1.26          | -1.01           | 1.38      | 1.42        | 1.05      | 1.09        | -1.15      | -1.30        | -1.33      | -1.03        | -1.55      | -1.54        |
| F11R           | F11 receptor                               | chr1q21.2-q21.3      | inflammatory response                                 | ---                                       | -1.04         | 1.03            | -1.02     | -1.10       | 1.28      | 1.06        | -1.05      | 1.00         | 1.17       | 1.28         | 1.27       | 1.31         |
| F12            | coagulation factor XII (Hageman factor)    | chr5q33-qter         | plasma kallikrein-kinin cascade                       | Blood_Clotting_Cascade // GenMAPP         | -1.29         | -1.27           | 1.04      | 1.23        | -1.26     | -1.22       | 1.33       | 1.30         | 2.24       | 1.77         | 1.49       | 1.76         |
| F13A1          | coagulation factor XIII A1                 | chr6p25.3-p24.3      | platelet degranulation                                | ---                                       | 1.84          | 1.29            | 1.03      | 1.30        | 1.70      | 1.34        | -1.27      | 1.10         | -1.14      | 1.08         | -1.72      | -2.61        |
| F3             | coagulation factor III (thrombin)          | chr1p22-p21          | positive regulation of endothelial cell proliferation | ---                                       | 1.25          | 1.67            | -1.07     | -1.22       | -1.06     | 1.10        | 1.51       | 1.49         | 2.20       | 2.04         | 7.01       | 4.35         |
| F5             | coagulation factor V (prothrombin)         | chr1q23              | platelet degranulation                                | Blood_Clotting_Cascade // GenMAPP         | 3.63          | -2.12           | 1.36      | -1.22       | 3.89      | -2.99       | -4.11      | 1.33         | 5.11       | 6.28         | 2.55       | 2.88         |
| F5             | coagulation factor V (prothrombin)         | chr1q23              | platelet degranulation                                | Blood_Clotting_Cascade // GenMAPP         | 1.45          | 2.01            | 1.65      | -1.04       | -1.60     | -1.30       | -2.78      | 1.23         | -1.17      | -1.67        | 2.21       | 3.16         |
| F8             | coagulation factor VIII, procoagulant      | chrXq28              | platelet degranulation                                | Blood_Clotting_Cascade // GenMAPP         | 1.08          | 1.03            | 1.02      | 1.05        | 1.13      | 1.02        | -1.21      | -1.11        | -1.57      | -1.36        | -2.67      | -2.38        |
| F8A1 // F8A    | coagulation factor VIII-associated protein | chrXq28              | platelet degranulation                                | Blood_Clotting_Cascade // GenMAPP         | -1.03         | -1.10           | -1.02     | 1.12        | 1.02      | -1.06       | -1.01      | 1.05         | -1.20      | -1.16        | -1.36      | -1.07        |
| FA2H           | fatty acid 2-hydroxylase                   | chr16q23             | sebaceous gland cell differentiation                  | ---                                       | 1.03          | 1.04            | 1.02      | 1.06        | -1.04     | 1.07        | 1.28       | 1.09         | 2.62       | 2.63         | 2.03       | 2.28         |
| FA2H           | fatty acid 2-hydroxylase                   | chr16q23             | sebaceous gland cell differentiation                  | ---                                       | -1.06         | -1.20           | -1.15     | -1.05       | -1.33     | -1.06       | 1.28       | -1.23        | 1.87       | 2.22         | 2.01       | 1.93         |
| FAAH2          | fatty acid amide hydrolase                 | chrXp11.21           | 0                                                     | ---                                       | 1.23          | 1.20            | 1.07      | 1.12        | -1.05     | 1.11        | 1.40       | 1.26         | -1.66      | -1.87        | -1.78      | -2.58        |
| FABP3          | fatty acid binding protein 3               | chr1p33-p32          | fatty acid metabolic process                          | ---                                       | 1.37          | 1.27            | -1.18     | -1.23       | -1.04     | -1.17       | 1.12       | 1.09         | 1.22       | 1.08         | 1.39       | 1.71         |
| FABP6          | fatty acid binding protein 6               | chr5q33.3-q34        | lipid metabolic process                               | ---                                       | 2.41          | 2.71            | 10.95     | 8.38        | 2.19      | -1.66       | -1.29      | -1.14        | 2.01       | 1.94         | 1.25       | 1.75         |
| FADD           | Fas (TNFRSF6)-associated protein           | chr11q13.3           | toll-like receptor signaling pathway                  | Apoptosis // GenMAPP // Apoptosis_GenMAPP | -1.08         | -1.06           | -1.06     | -1.02       | 1.05      | -1.02       | -1.02      | -1.01        | 1.22       | 1.08         | 1.22       | 1.16         |
| FADS1 // FADS2 | fatty acid desaturase 1 // 2               | chr11q12.2-q13.1     | regulation of transcription, DNA-dependent            | ---                                       | -1.18         | -1.12           | 1.01      | -1.02       | 1.05      | -1.01       | 1.08       | -1.00        | 1.12       | 1.12         | 1.12       | 1.20         |

| ID          | Gene Title                    | Chromosomal Location | 1st Gene Ontology Biological Process       | Pathway | A2497 30 mins | A2497P' 30 mins | A2497 2 h | A2497P' 2 h | A2497 4 h | A2497P' 4 h | A2497 24 h | A2497P' 24 h | A2497 48 h | A2497P' 48 h | A2497 72 h | A2497P' 72 h |
|-------------|-------------------------------|----------------------|--------------------------------------------|---------|---------------|-----------------|-----------|-------------|-----------|-------------|------------|--------------|------------|--------------|------------|--------------|
| FADS1 /// M | fatty acid desaturase 1 /// m | chr11q12.2-q13.1     | regulation of transcription, DNA-depend    | ---     | -1.13         | -1.12           | -1.02     | -1.05       | -1.09     | -1.01       | -1.06      | -1.02        | 1.05       | 1.14         | 1.05       | 1.20         |
| FADS2       | fatty acid desaturase 2       | chr11q12.2           | lipid metabolic process                    | ---     | -1.27         | -1.15           | -1.00     | -1.13       | 1.13      | 1.09        | -1.12      | 1.02         | 1.35       | 1.05         | 1.30       | 1.60         |
| FADS3       | fatty acid desaturase 3       | chr11q12-q13.1       | lipid metabolic process                    | ---     | -1.18         | -1.21           | -1.01     | 1.04        | 1.19      | 1.04        | -1.05      | -1.12        | 1.08       | -1.19        | -1.30      | -1.14        |
| FADS3       | fatty acid desaturase 3       | chr11q12-q13.1       | lipid metabolic process                    | ---     | 1.03          | -1.02           | -1.08     | 1.01        | -1.02     | -1.15       | -1.28      | -1.09        | -1.05      | -1.09        | -1.59      | -1.35        |
| FAF1        | Fas (TNFRSF6) associated      | chr1p33              | apoptotic process                          | ---     | 1.15          | -1.04           | 1.07      | -1.15       | -1.07     | 1.12        | -1.21      | -1.20        | -1.96      | -1.57        | -2.27      | -1.85        |
| FAF1        | Fas (TNFRSF6) associated      | chr1p33              | apoptotic process                          | ---     | -1.10         | -1.11           | 1.06      | 1.10        | 1.08      | -1.14       | 1.42       | 1.25         | 1.67       | 1.22         | 1.31       | 1.25         |
| FAF1        | Fas (TNFRSF6) associated      | chr1p33              | apoptotic process                          | ---     | -1.01         | -1.07           | -1.00     | 1.09        | -1.02     | -1.05       | 1.32       | 1.16         | 1.37       | 1.23         | 1.16       | 1.16         |
| FAH         | fumarylacetoacetate hydrol    | chr15q25.1           | arginine catabolic process                 | ---     | -1.00         | -1.08           | -1.11     | 1.01        | -1.03     | -1.07       | 1.03       | 1.06         | 1.53       | 1.53         | -1.42      | -1.07        |
| FAHD1       | fumarylacetoacetate hydrol    | chr16p13.3           | metabolic process                          | ---     | -1.09         | -1.09           | 1.05      | -1.22       | -1.04     | 1.01        | -1.00      | -1.05        | -1.52      | -1.18        | -1.17      | -1.10        |
| FAHD1       | fumarylacetoacetate hydrol    | chr16p13.3           | metabolic process                          | ---     | 1.06          | 1.03            | 1.04      | -1.03       | 1.02      | 1.03        | 1.05       | 1.03         | -1.51      | -1.30        | -1.28      | -1.35        |
| FAHD2A      | fumarylacetoacetate hydrol    | chr2q11.2            | metabolic process                          | ---     | 1.25          | 1.09            | -1.00     | 1.11        | 1.08      | -1.33       | 1.01       | -1.10        | -2.50      | -1.62        | -1.08      | 1.20         |
| FAHD2CP     | fumarylacetoacetate hydrol    | chr2q11.1            | 0                                          | ---     | -1.53         | -1.36           | -1.10     | 1.28        | -1.15     | 1.04        | 1.26       | 1.16         | -1.39      | -1.41        | -2.04      | -1.31        |
| FAIM        | Fas apoptotic inhibitory me   | chr3q22.3            | apoptotic process                          | ---     | 1.19          | 1.03            | 1.07      | 1.10        | -1.04     | -1.11       | -1.24      | 1.08         | -2.28      | -3.03        | -2.66      | -2.79        |
| FAM101B     | family with sequence simil    | chr17p13             | epithelial to mesenchymal transition       | ---     | 1.12          | 1.15            | 1.14      | -1.09       | 1.10      | 1.15        | -1.27      | -1.11        | -1.41      | -1.22        | -1.21      | -1.47        |
| FAM102A     | family with sequence simil    | chr9q34.11           | 0                                          | ---     | -1.14         | -1.11           | -1.16     | -1.41       | 1.02      | 1.04        | -1.20      | -1.16        | -1.47      | -1.09        | -1.47      | -1.21        |
| FAM103A1    | family with sequence simil    | chr15q25.2           | 7-methylguanosine mRNA capping             | ---     | -1.06         | -1.05           | 1.05      | -1.06       | 1.05      | 1.05        | 1.10       | 1.11         | 1.67       | 1.47         | 1.60       | 1.45         |
| FAM104B /// | family with sequence simil    | chrXp11.21           | 0                                          | ---     | 1.09          | 1.04            | -1.02     | 1.13        | 1.05      | 1.55        | -1.15      | 1.04         | -1.13      | 1.23         | -1.32      | -1.07        |
| FAM106A /// | family with sequence simil    | chr17p11.2           | 0                                          | ---     | 1.05          | 1.28            | 1.35      | 1.29        | 1.46      | 1.32        | -1.18      | -1.44        | -1.35      | -1.65        | -3.05      | -1.45        |
| FAM107B     | family with sequence simil    | chr10p13             | 0                                          | ---     | 1.28          | 1.31            | 1.02      | -1.10       | 1.01      | 1.01        | -1.02      | -1.14        | -1.21      | -1.31        | -1.25      | -1.63        |
| FAM107B     | family with sequence simil    | chr10p13             | 0                                          | ---     | -1.03         | -1.02           | 1.01      | -1.08       | -1.03     | 1.11        | -1.04      | -1.09        | -1.21      | -1.07        | -1.36      | -1.37        |
| FAM110A     | family with sequence simil    | chr20p13             | 0                                          | ---     | -1.43         | -1.43           | 1.10      | 1.36        | 1.23      | 1.13        | 1.16       | 1.11         | 1.90       | 1.85         | 1.11       | 1.38         |
| FAM110B     | family with sequence simil    | chr8q12.1            | 0                                          | ---     | 1.12          | 1.05            | -1.25     | -1.23       | -1.08     | -1.17       | -1.41      | -1.07        | -3.69      | -2.21        | -3.55      | -2.69        |
| FAM110B     | family with sequence simil    | chr8q12.1            | 0                                          | ---     | -1.13         | -1.29           | 1.19      | 1.06        | -1.22     | 1.05        | 1.09       | -1.44        | -1.20      | -1.44        | -1.25      | -1.25        |
| FAM110C     | family with sequence simil    | chr2q25.3            | positive regulation of cell migration      | ---     | -1.07         | -1.06           | -1.02     | -1.02       | 1.16      | 1.11        | 1.07       | 1.01         | 1.40       | 2.06         | 1.44       | 1.76         |
| FAM111A     | family with sequence simil    | chr11q12.1           | M phase of mitotic cell cycle              | ---     | 1.02          | -1.07           | -1.01     | 1.03        | 1.04      | 1.09        | -1.09      | -1.07        | -1.23      | -1.23        | -1.17      | -1.13        |
| FAM111B     | family with sequence simil    | chr11q12.1           | metabolic process                          | ---     | -1.19         | -1.12           | 1.25      | 1.05        | 1.11      | 1.14        | -1.33      | -1.23        | -2.73      | -1.97        | -1.55      | -1.82        |
| FAM111B     | family with sequence simil    | chr11q12.1           | metabolic process                          | ---     | -1.08         | -1.07           | 1.07      | -1.00       | 1.13      | 1.04        | -1.33      | -1.00        | -1.84      | -1.64        | -1.41      | -1.53        |
| FAM114A1    | family with sequence simil    | chr4p14              | 0                                          | ---     | -1.13         | -1.21           | -1.01     | -1.06       | 1.13      | 1.10        | -1.03      | -1.08        | 1.69       | 1.60         | 2.02       | 2.29         |
| FAM114A1    | family with sequence simil    | chr4p14              | 0                                          | ---     | 1.02          | 1.02            | 1.02      | -1.05       | -1.05     | -1.10       | -1.09      | -1.04        | 1.08       | 1.14         | 1.38       | 1.49         |
| FAM115A /// | family with sequence simil    | chr7q35              | 0                                          | ---     | 1.01          | 1.03            | -1.02     | -1.03       | 1.05      | 1.21        | 1.17       | 1.06         | -1.12      | 1.04         | -1.33      | -1.25        |
| FAM115A /// | family with sequence simil    | chr7q35              | 0                                          | ---     | -1.09         | -1.07           | 1.05      | -1.00       | -1.15     | 1.09        | -1.21      | -1.11        | -1.30      | 1.13         | -1.47      | -1.34        |
| FAM115C /// | family with sequence simil    | chr7q35              | 0                                          | ---     | -1.98         | 2.22            | 1.14      | 1.26        | 1.13      | 1.12        | 1.03       | -1.02        | 3.27       | 2.72         | -1.18      | 1.11         |
| FAM117A     | family with sequence simil    | chr17q21.33          | 0                                          | ---     | -2.05         | -1.99           | 2.21      | 1.34        | 3.30      | 1.28        | -1.32      | -1.20        | 1.60       | 2.46         | 4.11       | 3.99         |
| FAM117B     | family with sequence simil    | chr2q33.2            | 0                                          | ---     | 1.08          | 1.12            | -1.02     | -1.03       | -1.04     | 1.11        | -1.18      | -1.01        | -1.65      | -1.32        | 1.08       | -1.10        |
| FAM118B     | family with sequence simil    | chr11q24.2           | 0                                          | ---     | -1.02         | -1.14           | 1.24      | 1.36        | 1.15      | 1.04        | -1.49      | 1.07         | -1.52      | -2.13        | -1.16      | -1.24        |
| FAM120A     | family with sequence simil    | chr9q22.31           | 0                                          | ---     | 1.24          | 1.37            | -1.35     | -1.26       | -1.59     | -1.80       | 1.49       | 1.26         | -1.01      | -1.16        | -1.32      | -1.48        |
| FAM120AOS   | family with sequence simil    | chr9q22.31           | 0                                          | ---     | 1.08          | 1.00            | 1.12      | 1.11        | 1.06      | -1.05       | 1.06       | -1.23        | -1.35      | 1.01         | -1.39      | -1.54        |
| FAM120B     | family with sequence simil    | chr6q27              | transcription, DNA-dependent               | ---     | 1.01          | -1.07           | 1.06      | -1.04       | 1.02      | -1.04       | 1.08       | 1.17         | 1.22       | 1.11         | 1.56       | 1.58         |
| FAM120B     | family with sequence simil    | chr6q27              | transcription, DNA-dependent               | ---     | -1.12         | -1.02           | 1.00      | -1.40       | -1.08     | 1.08        | -1.38      | 1.41         | -1.32      | -1.62        | -1.92      | -1.98        |
| FAM120C     | family with sequence simil    | chrXp11.22           | 0                                          | ---     | -1.08         | -1.07           | -1.06     | 1.03        | 1.11      | -1.02       | -1.15      | 1.04         | -1.70      | -1.41        | -1.88      | -1.58        |
| FAM122A     | family with sequence simil    | chr9q21.11           | 0                                          | ---     | 1.01          | 1.05            | 1.12      | -1.09       | 1.17      | -1.04       | -1.25      | -1.17        | -2.68      | -3.51        | -3.45      | -2.54        |
| FAM122A     | NULL                          | ---                  | 0                                          | ---     | 1.19          | 1.24            | 1.03      | 1.48        | 1.05      | 1.14        | -1.11      | -1.01        | -3.38      | -3.24        | -4.60      | -4.12        |
| FAM122B     | family with sequence simil    | chrXq26.3            | 0                                          | ---     | 1.36          | 1.24            | 1.04      | 1.05        | -1.10     | 1.12        | 1.04       | -1.03        | 1.46       | 1.40         | 1.81       | 1.33         |
| FAM122B     | family with sequence simil    | chrXq26.3            | brain development                          | ---     | -1.07         | 1.01            | -1.03     | -1.01       | -1.22     | 1.05        | -1.49      | -1.12        | -2.45      | -1.65        | -2.40      | -2.58        |
| FAM122B     | family with sequence simil    | chrXq26.3            | 0                                          | ---     | 1.31          | 1.23            | 1.10      | -1.03       | -1.14     | 1.02        | -1.36      | -1.23        | -1.72      | -1.78        | -1.81      | -2.09        |
| FAM122C     | family with sequence simil    | chrXq26.3            | 0                                          | ---     | 1.89          | 2.37            | -1.20     | -1.27       | 1.22      | 1.99        | -1.66      | -1.04        | 2.22       | 1.83         | 2.42       | 1.59         |
| FAM122C     | family with sequence simil    | chrXq26.3            | 0                                          | ---     | 1.23          | 1.16            | 1.16      | -1.35       | -1.25     | 1.03        | -1.16      | 1.26         | 1.49       | 1.54         | 1.99       | 1.35         |
| FAM122C     | family with sequence simil    | chrXq26.3            | 0                                          | ---     | 1.07          | 1.18            | -1.01     | 1.01        | -1.17     | -1.08       | 1.21       | -1.05        | 1.32       | 1.16         | -1.35      | -1.87        |
| FAM124A     | family with sequence simil    | chr13q14.3           | 0                                          | ---     | -1.04         | -1.12           | 1.08      | 1.05        | 1.20      | 1.06        | 1.23       | 1.33         | -1.99      | -1.89        | -2.84      | -2.33        |
| FAM124A     | family with sequence simil    | chr13q14.3           | 0                                          | ---     | -1.13         | -1.12           | 1.11      | 1.04        | 1.11      | 1.11        | 1.02       | 1.00         | -1.58      | -1.68        | -2.05      | -2.03        |
| FAM126A     | family with sequence simil    | chr7p15.3            | signal transduction                        | ---     | -1.02         | -1.25           | -1.00     | -1.45       | -1.23     | -1.03       | -1.41      | -1.77        | 1.79       | 2.10         | 1.64       | 1.22         |
| FAM126A     | family with sequence simil    | chr7p15.3            | signal transduction                        | ---     | 1.04          | 1.31            | 1.13      | 1.01        | 1.16      | 1.39        | -1.08      | 1.01         | 1.24       | 1.11         | 1.08       | -1.07        |
| FAM126B     | family with sequence simil    | chr2q33.1            | 0                                          | ---     | 1.65          | 1.92            | 1.25      | -1.15       | 1.42      | 2.16        | 1.05       | 1.16         | 2.47       | -1.15        | 1.56       | 1.82         |
| FAM126B     | family with sequence simil    | chr2q33.1            | 0                                          | ---     | -1.01         | 1.09            | 1.34      | -1.11       | -1.21     | 1.00        | -1.21      | -1.36        | 1.44       | 1.66         | 1.78       | 1.33         |
| FAM126B     | family with sequence simil    | chr2q33.1            | 0                                          | ---     | -1.04         | 1.10            | 1.07      | -1.09       | -1.02     | 1.13        | -1.14      | -1.30        | 1.13       | 1.25         | 1.74       | 1.35         |
| FAM126B     | family with sequence simil    | chr2q33.1            | 0                                          | ---     | 1.30          | 1.25            | 1.12      | -1.04       | 1.11      | 1.15        | -1.04      | -1.03        | 1.12       | 1.11         | 1.28       | 1.22         |
| FAM127A     | family with sequence simil    | chrXq26              | 0                                          | ---     | -1.06         | -1.04           | -1.04     | 1.04        | 1.02      | -1.02       | 1.10       | 1.01         | 1.27       | 1.28         | 1.10       | 1.28         |
| FAM127B     | family with sequence simil    | chrXq26.3            | 0                                          | ---     | 1.01          | -1.14           | 1.04      | 1.04        | 1.19      | 1.06        | 1.26       | 1.18         | -1.01      | 1.15         | -1.12      | 1.10         |
| FAM129A     | family with sequence simil    | chr1q25              | negative regulation of protein phosphory   | ---     | -1.16         | -1.22           | -1.01     | 1.15        | -1.12     | -1.04       | -1.15      | -1.09        | -1.20      | -1.29        | -1.68      | -1.39        |
| FAM129A     | family with sequence simil    | chr1q25              | negative regulation of protein phosphory   | ---     | 1.01          | -1.06           | 1.01      | -1.02       | -1.03     | 1.02        | -1.24      | 1.06         | -1.43      | -1.19        | -1.58      | -1.22        |
| FAM129B     | family with sequence simil    | chr9q34.13           | negative regulation of apoptotic process   | ---     | -1.04         | -1.12           | 1.02      | 1.13        | -1.05     | -1.07       | 1.20       | 1.23         | 1.98       | 1.82         | 1.53       | 1.78         |
| FAM129B     | family with sequence simil    | chr9q34.13           | negative regulation of apoptotic process   | ---     | 1.23          | 1.01            | 1.17      | 1.16        | 1.11      | 1.03        | 1.36       | -1.01        | 2.89       | 2.20         | 2.07       | 2.19         |
| FAM131A     | family with sequence simil    | chr3q27.1            | 0                                          | ---     | 1.48          | 1.54            | 1.17      | 1.10        | -1.13     | 1.08        | -1.45      | -1.01        | -2.23      | -1.21        | -1.99      | -1.26        |
| FAM131A     | family with sequence simil    | chr3q27.1            | 0                                          | ---     | -1.01         | -1.05           | -1.00     | -1.06       | 1.05      | 1.04        | 1.37       | 1.10         | 1.47       | 1.50         | 1.26       | 1.24         |
| FAM132A     | family with sequence simil    | chr1p36.33           | regulation of glucose metabolic process    | ---     | 1.98          | 1.04            | -1.26     | 1.71        | -2.56     | 1.02        | -1.93      | -1.81        | 1.24       | 1.52         | 1.68       | 1.59         |
| FAM132B     | family with sequence simil    | chr2q37.3            | regulation of fatty acid metabolic process | ---     | -1.17         | -1.23           | -1.15     | 1.10        | 1.04      | -1.13       | -1.01      | 1.51         | 1.12       | 1.42         | 1.38       | 1.88         |

| ID          | Gene Title                 | Chromosomal Location  | 1st Gene Ontology Biological Process    | Pathway | A2497 30 mins | A2497P' 30 mins | A2497 2 h | A2497P' 2 h | A2497 4 h | A2497P' 4 h | A2497 24 h | A2497P' 24 h | A2497 48 h | A2497P' 48 h | A2497 72 h | A2497P' 72 h |
|-------------|----------------------------|-----------------------|-----------------------------------------|---------|---------------|-----------------|-----------|-------------|-----------|-------------|------------|--------------|------------|--------------|------------|--------------|
| FAM133A     | family with sequence simil | chrXq21.32            | 0                                       | ---     | 1.10          | -1.11           | 1.05      | 1.21        | -1.12     | 1.19        | -1.44      | 1.18         | -1.29      | -1.31        | -1.42      | -1.38        |
| FAM133B /// | family with sequence simil | chr2q24.1 /// chr7q20 | 0                                       | ---     | 2.03          | 2.02            | 1.04      | -1.15       | 1.40      | 1.15        | -1.01      | -1.08        | -2.42      | -3.50        | -2.06      | -1.75        |
| FAM134A     | family with sequence simil | chr2q35               | 0                                       | ---     | -1.00         | -1.03           | -1.07     | 1.00        | 1.05      | 1.13        | -1.25      | -1.25        | -1.80      | -1.25        | -1.94      | -1.70        |
| FAM134A     | family with sequence simil | chr2q35               | 0                                       | ---     | 1.04          | -1.00           | 1.01      | 1.11        | 1.01      | 1.03        | 1.19       | 1.16         | -1.24      | -1.11        | -1.41      | -1.31        |
| FAM134B     | family with sequence simil | chr5p15.1             | sensory perception of pain              | ---     | -1.04         | 1.05            | -1.07     | -1.11       | -1.01     | 1.07        | -1.03      | -1.09        | -2.35      | -2.35        | -2.43      | -2.44        |
| FAM134B     | family with sequence simil | chr5p15.1             | sensory perception of pain              | ---     | 1.05          | 1.03            | -1.01     | -1.15       | 1.23      | 1.14        | 1.09       | -1.15        | -2.11      | -2.19        | -2.85      | -2.92        |
| FAM134C     | family with sequence simil | chr17q21.2            | 0                                       | ---     | -1.05         | -1.08           | 1.05      | -1.07       | -1.04     | 1.02        | -1.01      | -1.02        | -1.16      | -1.16        | -1.01      | 1.10         |
| FAM135A     | family with sequence simil | chr6q13               | GPI anchor metabolic process            | ---     | 1.20          | 1.09            | 1.22      | -1.06       | -1.23     | 1.03        | -1.03      | 1.11         | -1.68      | -2.04        | -1.88      | -1.82        |
| FAM136A     | family with sequence simil | chr2p13.3             | 0                                       | ---     | -1.11         | -1.06           | -1.07     | -1.14       | -1.09     | -1.00       | -1.11      | 1.01         | -1.07      | -1.03        | -1.10      | -1.05        |
| FAM13A      | family with sequence simil | chr4q22.1             | signal transduction                     | ---     | 1.03          | -1.01           | 1.27      | 1.28        | 1.09      | 1.03        | 1.00       | 1.12         | -1.14      | 1.36         | 1.01       | 1.32         |
| FAM13A      | family with sequence simil | chr4q22.1             | signal transduction                     | ---     | 1.05          | -1.05           | 1.10      | 1.10        | 1.14      | 1.02        | -1.09      | 1.06         | -1.35      | 1.22         | -1.05      | 1.24         |
| FAM13A      | family with sequence simil | chr4q22.1             | signal transduction                     | ---     | 1.10          | 1.17            | -1.12     | -1.03       | -1.01     | -1.05       | 1.18       | -1.03        | 1.17       | 1.31         | 1.29       | 1.86         |
| FAM13A-AS   | FAM13A antisense RNA 1     | chr4q22.1             | 0                                       | ---     | 1.00          | -1.23           | 1.20      | 1.25        | -1.06     | 1.15        | 1.45       | 1.39         | -1.25      | 1.30         | -1.33      | 1.02         |
| FAM13B      | family with sequence simil | chr5q31               | signal transduction                     | ---     | 1.01          | 1.02            | -1.03     | -1.13       | 1.05      | -1.10       | -1.09      | -1.11        | -2.02      | -1.73        | -1.49      | -1.46        |
| FAM13C      | family with sequence simil | chr10q21.1            | 0                                       | ---     | 1.11          | 1.16            | -1.09     | -1.04       | -1.03     | 1.05        | -1.32      | -1.03        | -7.54      | -5.42        | -6.61      | -6.64        |
| FAM13C      | family with sequence simil | chr10q21.1            | 0                                       | ---     | -1.44         | -3.03           | -2.52     | -1.31       | -3.66     | -10.18      | -2.97      | -10.44       | 1.29       | 2.32         | 1.57       | 2.97         |
| FAM149A     | family with sequence simil | chr4q35.1             | 0                                       | ---     | 1.56          | 3.39            | -1.07     | -3.23       | -1.35     | -1.84       | -1.57      | -1.98        | -1.90      | -2.90        | -1.60      | -2.11        |
| FAM150B     | family with sequence simil | chr2p25.3             | 0                                       | ---     | 1.41          | -1.16           | 1.70      | 1.13        | -1.24     | -1.22       | -1.61      | -1.87        | 1.05       | -1.54        | 1.41       | 1.42         |
| FAM153A /// | family with sequence simil | chr5q35.2 /// chr5q30 | 0                                       | ---     | -2.91         | -1.84           | 1.22      | -1.06       | -2.96     | -4.65       | -5.86      | -1.26        | 4.00       | 3.33         | 2.24       | 1.15         |
| FAM153B /// | family with sequence simil | chr5q35.2             | 0                                       | ---     | 1.00          | -1.37           | 1.89      | 3.14        | -1.76     | -2.92       | 1.27       | 1.86         | 5.96       | 7.66         | -6.36      | -1.29        |
| FAM160A1    | family with sequence simil | chr4q31.3             | 0                                       | ---     | 1.10          | 1.11            | 1.07      | -1.11       | 1.00      | 1.03        | -1.08      | -1.35        | -1.41      | 1.06         | -1.01      | ---          |
| FAM161A     | family with sequence simil | chr2p15               | visual perception                       | ---     | 1.28          | 1.13            | 1.09      | 1.16        | -1.12     | 1.09        | -1.46      | -1.21        | -2.65      | -1.73        | -2.29      | -2.99        |
| FAM161A     | family with sequence simil | chr2p15               | visual perception                       | ---     | -1.11         | -1.17           | 1.07      | 1.00        | -1.07     | -1.05       | 1.18       | 1.29         | -1.49      | -1.51        | -1.89      | -1.86        |
| FAM162A     | family with sequence simil | chr3q21.1             | apoptotic process                       | ---     | -1.06         | -1.07           | 1.01      | 1.09        | 1.07      | 1.03        | 1.16       | 1.07         | 1.42       | 1.29         | 1.49       | 1.75         |
| FAM162A     | family with sequence simil | chr3q21.1             | apoptotic process                       | ---     | -1.04         | -1.07           | -1.01     | 1.04        | 1.02      | 1.04        | 1.11       | 1.02         | 1.40       | 1.32         | 1.50       | 1.81         |
| FAM162A     | family with sequence simil | chr3q21.1             | apoptotic process                       | ---     | -1.07         | -1.05           | -1.02     | 1.02        | 1.00      | -1.01       | 1.11       | 1.06         | 1.41       | 1.30         | 1.39       | 1.63         |
| FAM166A     | family with sequence simil | chr9q34.3             | 0                                       | ---     | -1.18         | -1.09           | -1.04     | -1.14       | 1.04      | 1.04        | -1.02      | -1.15        | 1.27       | 1.33         | 1.17       | 1.21         |
| FAM168B     | family with sequence simil | chr2q21.1             | 0                                       | ---     | 1.04          | 1.10            | 1.39      | 1.17        | 1.14      | -1.20       | 1.10       | 1.20         | -1.22      | -1.25        | 1.15       | -1.03        |
| FAM169A     | family with sequence simil | chr5q13.3             | 0                                       | ---     | -1.10         | -1.03           | 1.02      | -1.12       | 1.43      | -1.06       | -1.39      | 1.04         | -2.06      | -1.61        | -1.63      | -2.05        |
| FAM169A     | family with sequence simil | chr5q13.3             | 0                                       | ---     | 1.29          | 1.21            | 1.03      | -1.02       | -1.20     | 1.07        | -1.36      | -1.00        | -1.35      | -1.24        | -1.99      | -2.31        |
| FAM169B     | family with sequence simil | chr15q26.3            | 0                                       | ---     | 2.20          | 1.32            | -1.90     | -15.73      | -1.19     | -1.12       | -1.39      | -1.08        | 5.30       | 2.09         | -2.08      | -1.37        |
| FAM170B-A   | FAM170B antisense RNA      | ---                   | 0                                       | ---     | -1.89         | -4.49           | 1.07      | -1.41       | 1.10      | 2.79        | -1.12      | 1.60         | -2.40      | -1.60        | 2.03       | 9.29         |
| FAM171A1    | family with sequence simil | chr10p13              | 0                                       | ---     | -1.06         | -1.04           | -1.03     | -1.01       | 1.05      | -1.02       | -1.24      | -1.13        | -1.49      | -1.46        | -1.55      | -1.53        |
| FAM171B     | family with sequence simil | chr2q32.1             | 0                                       | ---     | 1.48          | 1.33            | 1.30      | 1.21        | -1.15     | -1.39       | -1.78      | -1.44        | -2.41      | -2.08        | -1.60      | -2.83        |
| FAM171B     | family with sequence simil | chr2q32.1             | 0                                       | ---     | -1.37         | -1.68           | -1.02     | 1.26        | -1.15     | -1.32       | 1.12       | 1.56         | 1.08       | -1.00        | -1.49      | -1.27        |
| FAM172A     | family with sequence simil | chr5q15               | 0                                       | ---     | 1.07          | 1.02            | -1.05     | -1.07       | -1.09     | -1.13       | -1.29      | -1.09        | -1.85      | -1.21        | -1.88      | -1.90        |
| FAM173B     | family with sequence simil | chr5p15.2             | 0                                       | ---     | 1.12          | -1.14           | -1.06     | -1.07       | 1.22      | 1.16        | -1.10      | -1.28        | -2.18      | -2.62        | -1.96      | -1.42        |
| FAM173B     | family with sequence simil | chr5p15.2             | 0                                       | ---     | 1.06          | 1.07            | 1.05      | 1.01        | 1.18      | 1.17        | -1.35      | -1.14        | -2.30      | -1.94        | -2.70      | -2.67        |
| FAM174B     | family with sequence simil | chr15q26.1            | 0                                       | ---     | -1.09         | -1.09           | -1.08     | -1.03       | 1.21      | 1.02        | -1.18      | -1.01        | 1.60       | 1.22         | 2.00       | 1.97         |
| FAM174B     | family with sequence simil | chr15q26.1            | 0                                       | ---     | -1.06         | -1.06           | 1.05      | 1.00        | 1.23      | 1.29        | -1.37      | -1.29        | 1.28       | -1.01        | 2.08       | 2.09         |
| FAM174B     | family with sequence simil | chr15q26.1            | 0                                       | ---     | -1.21         | -1.26           | 1.12      | 1.14        | -1.02     | 1.09        | -1.23      | -1.18        | 1.85       | 1.39         | 2.14       | 2.18         |
| FAM175A     | family with sequence simil | chr4q21.23            | DNA repair                              | ---     | 1.08          | -1.11           | 1.14      | -1.05       | 1.05      | 1.38        | 1.43       | -1.07        | -2.06      | -1.53        | -1.89      | -1.97        |
| FAM175B     | family with sequence simil | chr10q26.13           | 0                                       | ---     | 1.03          | 1.09            | -1.05     | -1.15       | 1.10      | 1.15        | 1.05       | 1.05         | 1.09       | 1.36         | 1.49       | 1.30         |
| FAM175B     | family with sequence simil | chr10q26.13           | 0                                       | ---     | 1.11          | 1.20            | -1.02     | -1.10       | -1.13     | -1.12       | -1.00      | 1.16         | 1.04       | -1.01        | 1.72       | 1.39         |
| FAM177A1    | family with sequence simil | chr14q13.2            | 0                                       | ---     | 1.09          | 1.02            | 1.19      | -1.00       | -1.02     | 1.12        | -1.42      | -1.18        | 1.15       | 1.13         | 1.12       | 1.02         |
| FAM178A     | family with sequence simil | chr10q24.31           | 0                                       | ---     | 1.28          | 1.13            | 1.10      | -1.09       | 1.50      | 1.29        | -1.11      | -1.18        | -1.29      | -1.54        | 1.27       | 1.24         |
| FAM179A     | family with sequence simil | chr2p23.2             | 0                                       | ---     | 1.25          | 1.25            | 1.02      | 1.00        | -1.11     | -1.04       | 1.24       | -1.04        | -2.08      | -2.49        | -3.25      | -3.97        |
| FAM179B     | family with sequence simil | chr14q21.2            | 0                                       | ---     | 1.14          | 1.09            | 1.13      | 1.10        | 1.09      | 1.06        | 1.03       | -1.03        | -2.24      | -1.53        | -1.65      | -1.88        |
| FAM182B /// | family with sequence simil | chr20p11.1 /// chr9p0 | 0                                       | ---     | -4.32         | -1.75           | -1.71     | 2.75        | 1.23      | 1.73        | 1.58       | 2.33         | 5.02       | 10.32        | 1.03       | -1.34        |
| FAM184A     | family with sequence simil | chr6q22.31            | 0                                       | ---     | -1.16         | -1.28           | -1.07     | -1.23       | -1.44     | -1.34       | -1.18      | -1.24        | -2.14      | -2.12        | -1.55      | -1.98        |
| FAM185A     | family with sequence simil | chr7q22.1             | 0                                       | ---     | -1.80         | -1.43           | 1.07      | -1.16       | 1.93      | 1.13        | 1.32       | 1.03         | 2.09       | 1.79         | 1.19       | 1.60         |
| FAM186A     | family with sequence simil | chr12q13.12           | 0                                       | ---     | -1.01         | -1.46           | -1.58     | -1.23       | -1.25     | 1.24        | -1.19      | -1.19        | -1.57      | 1.03         | -2.13      | -1.88        |
| FAM188A     | family with sequence simil | chr10p13              | apoptotic process                       | ---     | -1.04         | 1.04            | 1.26      | 1.13        | 1.20      | 1.16        | -1.31      | 1.12         | -1.79      | -1.12        | -1.34      | -1.34        |
| FAM188A     | family with sequence simil | chr10p13              | apoptotic process                       | ---     | -1.04         | -1.07           | -1.09     | -1.11       | 1.18      | -1.01       | 1.23       | 1.04         | -1.09      | 1.04         | 1.21       | 1.17         |
| FAM189B     | family with sequence simil | chr1q21               | 0                                       | ---     | 1.05          | -1.03           | 1.02      | 1.09        | -1.02     | -1.05       | 1.29       | 1.22         | 1.19       | 1.10         | 1.12       | 1.21         |
| FAM192A     | family with sequence simil | chr16q13              | 0                                       | ---     | -1.16         | -1.13           | -1.06     | -1.10       | -1.01     | 1.07        | 1.13       | 1.15         | -1.58      | -1.23        | -1.43      | -1.36        |
| FAM192A     | family with sequence simil | chr16q13              | 0                                       | ---     | -1.16         | -1.15           | -1.08     | -1.12       | 1.02      | -1.01       | -1.14      | 1.02         | -1.32      | -1.16        | -1.57      | -1.46        |
| FAM192A     | family with sequence simil | chr16q13              | 0                                       | ---     | -1.02         | 1.01            | 1.01      | 1.03        | 1.04      | 1.02        | -1.04      | -1.07        | -1.11      | -1.07        | -1.22      | -1.24        |
| FAM195A     | family with sequence simil | chr16p13.3            | 0                                       | ---     | 1.00          | -1.04           | 1.06      | 1.15        | -1.02     | -1.15       | 1.37       | 1.16         | 1.77       | 1.63         | 1.36       | 1.25         |
| FAM195A     | family with sequence simil | chr16p13.3            | 0                                       | ---     | -1.14         | -1.19           | 1.06      | 1.21        | 1.01      | -1.07       | 1.11       | -1.09        | 1.35       | 1.21         | 1.20       | 1.27         |
| FAM195B     | family with sequence simil | chr17q25.3            | 0                                       | ---     | 1.06          | -1.01           | -1.04     | 1.16        | 1.00      | -1.20       | 1.07       | -1.04        | 1.11       | 1.01         | -1.94      | -1.56        |
| FAM196A     | family with sequence simil | chr10q26.2            | 0                                       | ---     | 4.20          | 1.56            | 1.52      | 1.56        | -1.34     | -1.01       | 1.23       | 1.41         | -3.56      | -4.75        | -3.35      | -2.27        |
| FAM198B     | family with sequence simil | chr4q32.1             | 0                                       | ---     | -1.15         | -1.69           | 2.50      | 1.12        | 1.58      | -2.22       | 2.72       | 1.37         | 5.57       | 3.80         | 1.65       | -1.27        |
| FAM199X     | family with sequence simil | chrXq22.2             | 0                                       | ---     | 1.20          | 1.15            | -1.07     | -1.19       | -1.23     | 1.05        | -1.10      | -1.08        | -1.61      | -1.29        | -1.64      | -1.75        |
| FAM19A1     | family with sequence simil | chr3p14.1             | 0                                       | ---     | 1.26          | 1.03            | 1.25      | -1.08       | 1.50      | -1.65       | 1.83       | 2.95         | -8.62      | -1.42        | 1.88       | -1.27        |
| FAM200B     | family with sequence simil | chr4p15.32            | regulation of transcription, DNA-depend | ---     | -1.02         | -1.10           | -1.04     | -1.03       | -1.18     | -1.10       | -1.04      | 1.04         | -1.17      | -1.05        | -1.35      | -1.27        |

| ID           | Gene Title                 | Chromosomal Location  | 1st Gene Ontology Biological Process     | Pathway                      | A2497 30 mins | A2497P' 30 mins | A2497 2 h | A2497P' 2 h | A2497 4 h | A2497P' 4 h | A2497 24 h | A2497P' 24 h | A2497 48 h | A2497P' 48 h | A2497 72 h | A2497P' 72 h |
|--------------|----------------------------|-----------------------|------------------------------------------|------------------------------|---------------|-----------------|-----------|-------------|-----------|-------------|------------|--------------|------------|--------------|------------|--------------|
| FAM200B      | family with sequence simil | chr4p15.32            | regulation of transcription, DNA-depend  | ---                          | 1.20          | 1.19            | 1.09      | -1.00       | -1.13     | -1.03       | -1.18      | -1.17        | 1.13       | 1.19         | 1.46       | 1.13         |
| FAM201A      | family with sequence simil | chr9p13.1             | 0                                        | ---                          | -1.04         | -1.08           | 1.05      | 1.02        | 1.19      | 1.68        | -1.53      | -1.12        | -2.73      | -2.11        | -1.55      | -1.67        |
| FAM204A      | family with sequence simil | chr10q26.11           | 0                                        | ---                          | -1.08         | -1.19           | 1.02      | 1.02        | 1.01      | -1.08       | 1.14       | 1.14         | 1.37       | 1.33         | 1.11       | 1.28         |
| FAM204A      | family with sequence simil | chr10q26.11           | 0                                        | ---                          | 1.13          | -1.06           | 1.03      | 1.08        | -1.07     | -1.10       | 1.02       | 1.24         | -1.57      | -1.40        | -1.92      | -1.83        |
| FAM205B      | transmembrane protein C9q  | chr9p13.2             | 0                                        | ---                          | -1.77         | 3.14            | -1.04     | 1.46        | -1.46     | 3.01        | -1.05      | 1.68         | -1.34      | -2.52        | -1.83      | 2.53         |
| FAM207A      | family with sequence simil | chr21q22.3            | 0                                        | ---                          | -1.12         | -1.13           | 1.03      | 1.02        | 1.10      | -1.07       | 1.48       | 1.22         | 1.28       | 1.08         | 1.30       | 1.45         |
| FAM207A      | family with sequence simil | chr21q22.3            | 0                                        | ---                          | 1.60          | 1.25            | -1.37     | -2.11       | -1.06     | -1.19       | 1.70       | 1.16         | 2.13       | 1.71         | 1.13       | 1.21         |
| FAM208B      | family with sequence simil | chr10p15.1            | 0                                        | ---                          | 1.31          | 1.09            | -1.17     | -1.37       | 1.19      | -1.12       | 1.67       | 1.52         | -1.02      | -1.40        | 1.05       | -1.05        |
| FAM208B      | family with sequence simil | chr10p15.1            | 0                                        | ---                          | 1.07          | 1.07            | -1.05     | -1.04       | -1.01     | 1.04        | -1.15      | -1.14        | -1.19      | -1.16        | 1.45       | 1.21         |
| FAM209B      | family with sequence simil | chr20q13.31           | 0                                        | ---                          | -1.20         | -1.68           | 1.06      | 1.79        | 1.16      | 1.05        | -2.07      | 1.54         | 3.56       | 3.16         | 3.26       | 2.09         |
| FAM20B       | family with sequence simil | chr1q25               | phosphorylation                          | ---                          | -1.04         | -1.05           | 1.04      | 1.04        | 1.02      | 1.04        | 1.01       | -1.00        | 1.14       | 1.21         | 1.01       | 1.10         |
| FAM210A      | family with sequence simil | chr18p11.21           | 0                                        | ---                          | -1.07         | -1.08           | 1.00      | 1.12        | 1.02      | 1.04        | 1.06       | 1.19         | 1.63       | 1.69         | 1.34       | 1.55         |
| FAM210A      | family with sequence simil | chr18p11.21           | 0                                        | ---                          | 1.12          | -1.01           | -1.06     | 1.03        | 1.02      | -1.09       | -1.14      | -1.09        | 1.36       | 1.81         | 1.33       | 1.49         |
| FAM210A      | family with sequence simil | chr18p11.21           | 0                                        | ---                          | 1.01          | -1.02           | 1.05      | 1.03        | -1.16     | -1.12       | 1.04       | 1.12         | 1.24       | 1.38         | 1.43       | 1.47         |
| FAM210B      | family with sequence simil | chr20q13.2            | 0                                        | ---                          | 1.02          | -1.01           | 1.11      | 1.11        | 1.15      | -1.01       | 1.09       | -1.04        | -1.68      | -1.45        | -5.01      | -4.34        |
| FAM210B      | family with sequence simil | chr20q13.2            | 0                                        | ---                          | -1.07         | -1.09           | 1.13      | 1.09        | 1.04      | -1.06       | 1.04       | -1.19        | -1.82      | -1.83        | -3.80      | -3.95        |
| FAM211B      | family with sequence simil | chr22q11.23           | 0                                        | ---                          | 1.04          | 1.11            | -1.32     | 1.07        | -1.24     | -1.31       | 1.33       | 1.51         | 1.01       | -1.21        | -1.07      | 1.40         |
| FAM211B      | family with sequence simil | chr22q11.23           | 0                                        | ---                          | -1.09         | -1.53           | -1.11     | -1.03       | 1.30      | 1.52        | -1.49      | 1.53         | -2.11      | -1.26        | -1.85      | -1.50        |
| FAM213A      | family with sequence simil | chr10q23.1            | regulation of osteoclast differentiation | ---                          | -1.05         | -1.11           | 1.04      | 1.06        | 1.06      | -1.00       | 1.01       | -1.02        | 1.13       | 1.07         | -1.06      | 1.11         |
| FAM213A      | family with sequence simil | chr10q23.1            | regulation of osteoclast differentiation | ---                          | 1.04          | -1.08           | 1.02      | 1.06        | -1.07     | -1.02       | -1.20      | -1.03        | -1.23      | -1.08        | -1.20      | -1.07        |
| FAM213A      | family with sequence simil | chr10q23.1            | regulation of osteoclast differentiation | ---                          | 1.22          | 1.14            | -1.07     | -1.33       | 1.31      | 1.37        | -1.13      | -1.22        | -1.10      | 1.03         | 1.41       | 1.52         |
| FAM213B      | family with sequence simil | chr1p36.32            | prostaglandin biosynthetic process       | ---                          | -1.08         | -1.06           | 1.12      | 1.26        | 1.06      | 1.01        | 1.04       | 1.06         | -1.49      | -1.37        | -1.41      | -1.14        |
| FAM214A      | family with sequence simil | chr15q21.2-q21.3      | 0                                        | ---                          | 1.33          | 1.49            | 1.02      | -1.12       | 1.17      | 1.14        | 1.17       | 1.04         | -1.71      | -1.93        | -1.19      | -1.39        |
| FAM214B      | family with sequence simil | chr9p13.3             | 0                                        | ---                          | -1.17         | -1.13           | 1.33      | 1.34        | 1.10      | 1.10        | -1.22      | 1.10         | 1.36       | 1.49         | 1.20       | 1.12         |
| FAM214B      | family with sequence simil | chr9p13.3             | 0                                        | ---                          | -1.49         | -1.10           | 1.27      | 1.37        | 1.48      | 1.08        | -1.21      | -1.06        | 1.34       | 1.40         | -1.01      | -1.14        |
| FAM217B      | family with sequence simil | chr20q13.33           | 0                                        | ---                          | 1.05          | -1.01           | 1.05      | 1.02        | -1.04     | 1.12        | -1.49      | -1.06        | -1.91      | -1.93        | -2.12      | -1.88        |
| FAM219A      | family with sequence simil | chr9p13.3             | 0                                        | ---                          | 1.09          | -1.06           | -1.21     | -1.02       | -1.18     | -1.15       | -1.11      | 1.04         | 1.55       | 1.26         | 1.24       | 1.17         |
| FAM219B      | family with sequence simil | chr15q24.1            | 0                                        | ---                          | -1.12         | -1.14           | 1.10      | 1.12        | -1.06     | -1.07       | 1.08       | -1.02        | -1.14      | -1.08        | -1.40      | -1.14        |
| FAM219B      | family with sequence simil | chr15q24.1            | 0                                        | ---                          | 1.14          | -1.17           | 1.01      | -1.03       | 1.27      | 1.19        | 1.17       | 1.12         | -1.16      | -1.14        | -2.17      | -1.64        |
| FAM219B      | family with sequence simil | chr15q24.1            | 0                                        | ---                          | -1.08         | -1.13           | -1.07     | 1.12        | 1.16      | 1.11        | 1.19       | 1.04         | -1.04      | -1.00        | -1.76      | -1.44        |
| FAM21A /// F | family with sequence simil | chr10q11.1 /// chr10  | transport                                | ---                          | 1.06          | -1.04           | 1.01      | 1.16        | 1.00      | -1.03       | -1.04      | 1.01         | -1.27      | -1.38        | -1.21      | -1.19        |
| FAM21A /// F | family with sequence simil | chr10q11.1 /// chr10  | transport                                | ---                          | -1.03         | -1.11           | 1.06      | 1.10        | 1.03      | -1.09       | 1.10       | 1.06         | -1.22      | -1.35        | -1.28      | -1.37        |
| FAM21A /// F | family with sequence simil | chr10q11.1 /// chr10  | transport                                | ---                          | -1.06         | -1.08           | -1.05     | -1.01       | -1.04     | 1.07        | 1.02       | 1.13         | -1.31      | -1.20        | -1.42      | -1.36        |
| FAM21C       | family with sequence simil | chr10q11.1            | transport                                | ---                          | -1.00         | -1.03           | 1.05      | 1.06        | 1.04      | -1.03       | 1.02       | 1.09         | -1.33      | -1.39        | -1.36      | -1.36        |
| FAM220A      | family with sequence simil | chr7p22.1             | 0                                        | ---                          | 1.07          | 1.13            | 1.20      | 1.10        | 1.22      | 1.04        | -1.04      | -1.07        | -1.02      | 1.16         | 1.17       | 1.26         |
| FAM222A      | family with sequence simil | chr12q24.11           | 0                                        | ---                          | 1.29          | 1.08            | -1.07     | 1.11        | 1.89      | 2.05        | -1.56      | -1.19        | -1.72      | -3.17        | -1.23      | -1.65        |
| FAM222A-A    | FAM222A antisense RNA      | chr12q24.11           | 0                                        | ---                          | 1.09          | -2.87           | -1.94     | 1.55        | 1.85      | -1.49       | -1.60      | 1.54         | -4.80      | -4.61        | -3.76      | 1.15         |
| FAM222B      | family with sequence simil | chr17q11.2            | 0                                        | ---                          | -1.04         | -1.03           | 1.12      | -1.04       | 1.05      | 1.11        | 1.01       | 1.13         | -1.36      | -1.15        | -1.09      | -1.14        |
| FAM227B      | family with sequence simil | chr15q21.2            | 0                                        | ---                          | 1.19          | 1.03            | 1.17      | 1.06        | 1.06      | 1.18        | 1.08       | -1.00        | -1.58      | -1.22        | -1.39      | -2.53        |
| FAM228A      | family with sequence simil | chr2p23.3             | 0                                        | ---                          | -2.51         | -1.57           | -1.97     | -3.06       | 1.80      | 1.28        | 1.03       | -1.45        | 2.15       | 2.47         | 2.39       | 3.89         |
| FAM229B      | family with sequence simil | chr6p21               | 0                                        | ---                          | 1.04          | -1.07           | -1.04     | -1.03       | -1.03     | -1.09       | 1.02       | 1.08         | -1.13      | -1.28        | -1.70      | -1.68        |
| FAM230C      | family with sequence simil | ---                   | 0                                        | ---                          | 1.05          | 1.06            | -1.05     | -1.25       | 1.14      | -1.06       | 1.24       | 1.19         | -1.63      | -1.85        | -1.59      | -1.50        |
| FAM24B       | family with sequence simil | chr10q26.13           | 0                                        | ---                          | 1.08          | 1.03            | -1.05     | -1.29       | 1.03      | -1.02       | 1.22       | 1.09         | -1.07      | -1.01        | 1.59       | 1.38         |
| FAM26E       | family with sequence simil | chr6q22.1             | transport                                | ---                          | 2.58          | 1.83            | 2.07      | 1.43        | -1.20     | -1.43       | 1.50       | 1.15         | 1.05       | -1.24        | 1.44       | 1.81         |
| FAM26F       | family with sequence simil | chr6q22.1             | transport                                | ---                          | -1.10         | -1.07           | 1.02      | 1.01        | -1.02     | -1.05       | 1.21       | 1.36         | 1.47       | 1.51         | 1.08       | 1.23         |
| FAM26F       | family with sequence simil | chr6q22.1             | ion transport                            | ---                          | -1.03         | -1.06           | -1.02     | 1.11        | 1.14      | 1.01        | 1.34       | 1.31         | 1.47       | 1.42         | 1.14       | 1.34         |
| FAM27A /// F | family with sequence simil | chr9p11.2 /// chr9q10 | ---                                      | ---                          | -1.11         | -1.11           | 1.02      | 1.22        | 1.03      | -1.15       | 1.22       | 1.15         | -1.56      | -1.57        | -1.17      | -1.23        |
| FAM27E ///   | family with sequence simil | chr9p11.2 /// chr9q10 | ---                                      | ---                          | -1.01         | 1.24            | 1.06      | -1.68       | 1.12      | 1.26        | 1.60       | -1.25        | -2.94      | -1.65        | -1.63      | -1.42        |
| FAM27E3      | family with sequence simil | chr9q13               | 0                                        | ---                          | 1.02          | 1.13            | 1.27      | 1.27        | -1.14     | -1.12       | 1.02       | 1.19         | -1.85      | -1.81        | -1.76      | -1.44        |
| FAM3C        | family with sequence simil | chr7q31               | multicellular organismal development     | ---                          | -1.12         | -1.36           | 1.20      | 1.19        | -1.25     | -1.15       | -1.41      | -1.08        | -1.81      | -2.08        | -2.48      | -1.99        |
| FAM43A       | family with sequence simil | chr3q29               | 0                                        | ---                          | 1.09          | 1.03            | -1.03     | -1.08       | -1.19     | -1.41       | -1.31      | 1.21         | -1.42      | -1.09        | -3.71      | -2.70        |
| FAM45A       | family with sequence simil | chr10q25              | 0                                        | ---                          | 1.10          | -1.05           | 1.14      | 1.05        | 1.06      | -1.03       | -1.07      | -1.02        | -1.36      | -1.31        | 1.10       | -1.19        |
| FAM45A /// F | family with sequence simil | chr10q25 /// chrXq20  | ---                                      | ---                          | -1.00         | 1.01            | 1.14      | -1.02       | 1.03      | -1.11       | -1.20      | -1.18        | -1.18      | -1.10        | 1.27       | 1.36         |
| FAM46A       | family with sequence simil | chr6q14               | 0                                        | ---                          | -1.10         | -1.12           | 1.01      | 1.12        | 1.06      | 1.03        | -1.07      | -1.06        | -1.18      | -1.06        | -1.12      | 1.07         |
| FAM46A       | family with sequence simil | chr6q14               | 0                                        | ---                          | 1.07          | 1.07            | 1.03      | 1.03        | -1.02     | -1.00       | -1.04      | -1.06        | -1.12      | -1.01        | -1.05      | -1.01        |
| FAM46C       | family with sequence simil | chr1p12               | 0                                        | ---                          | 1.76          | 2.31            | -1.13     | -1.13       | 1.22      | 2.57        | 1.79       | 1.45         | 1.47       | 2.18         | 1.11       | 1.57         |
| FAM46C       | family with sequence simil | chr1p12               | 0                                        | ---                          | 1.08          | 1.05            | -1.12     | -1.21       | 1.26      | -1.23       | 1.19       | 1.52         | 1.92       | 2.76         | 1.37       | 1.76         |
| FAM47C       | family with sequence simil | chrXp21.1             | 0                                        | ---                          | -2.33         | -1.08           | -2.95     | -1.01       | 1.20      | 1.71        | 1.05       | -3.49        | 2.42       | 1.33         | 2.36       | 6.40         |
| FAM47E /// F | family with sequence simil | chr4q /// chr4q21.1   | regulation of transcription from RNA pol | Circadian_Eercise // GenMAPP | -1.05         | -1.09           | 1.01      | 1.03        | -1.03     | 1.01        | 1.24       | 1.22         | 1.41       | 1.73         | 1.65       | 2.02         |
| FAM49B       | family with sequence simil | chr8q24.21            | 0                                        | ---                          | -1.03         | -1.06           | -1.01     | -1.07       | -1.03     | -1.05       | -1.42      | -1.15        | -1.73      | -1.89        | -2.78      | -2.85        |
| FAM50B       | family with sequence simil | chr6p25.2             | 0                                        | ---                          | 1.10          | -1.00           | -1.01     | 1.09        | 1.02      | 1.01        | -1.09      | 1.07         | -1.14      | -1.46        | -1.09      | -1.15        |
| FAM53A       | family with sequence simil | chr4p16.3             | 0                                        | ---                          | -1.02         | 1.10            | -1.19     | 1.17        | 1.53      | 1.21        | 1.15       | 1.13         | -1.29      | -1.10        | -1.53      | -1.37        |
| FAM53B       | family with sequence simil | chr10q26.13           | 0                                        | ---                          | -1.07         | -1.10           | 1.09      | 1.15        | 1.00      | -1.06       | 1.17       | 1.13         | 1.10       | -1.05        | 1.15       | 1.28         |
| FAM53C       | family with sequence simil | chr5q31               | 0                                        | ---                          | -1.06         | -1.04           | 1.03      | -1.03       | 1.04      | -1.04       | -1.09      | -1.09        | -1.11      | -1.15        | 1.33       | 1.22         |
| FAM60A       | family with sequence simil | chr12p11              | negative regulation of cell migration    | ---                          | -1.11         | -1.06           | 1.08      | -1.08       | 1.23      | 1.01        | 1.40       | 1.20         | 1.53       | 1.28         | 1.71       | 1.33         |
| FAM63A       | family with sequence simil | chr1q21.3             | 0                                        | ---                          | 1.27          | -1.07           | -1.04     | -1.02       | 1.44      | 1.40        | -1.14      | 1.03         | -1.24      | -1.03        | -1.57      | -1.46        |

| ID            | Gene Title                   | Chromosomal Location  | 1st Gene Ontology Biological Process                    | Pathway                                 | A2497 30 mins | A2497P' 30 mins | A2497 2 h | A2497P' 2 h | A2497 4 h | A2497P' 4 h | A2497 24 h | A2497P' 24 h | A2497 48 h | A2497P' 48 h | A2497 72 h | A2497P' 72 h |
|---------------|------------------------------|-----------------------|---------------------------------------------------------|-----------------------------------------|---------------|-----------------|-----------|-------------|-----------|-------------|------------|--------------|------------|--------------|------------|--------------|
| FAM63B        | family with sequence simil   | chr15q21.3            | 0                                                       | ---                                     | 1.02          | -1.38           | -1.06     | -1.01       | -1.04     | 1.50        | -1.22      | -1.08        | -1.68      | -1.45        | -1.23      | -1.05        |
| FAM64A        | family with sequence simil   | chr17p13.2            | cell cycle                                              | ---                                     | 1.00          | -1.14           | -1.10     | -1.03       | 1.01      | 1.14        | -1.31      | -1.04        | 1.22       | 1.23         | 1.24       | 1.37         |
| FAM65A        | family with sequence simil   | chr16q22.1            | signal transduction                                     | ---                                     | -1.10         | -1.13           | 1.05      | 1.02        | -1.17     | -1.08       | 1.04       | -1.12        | 1.69       | 1.30         | 1.47       | 1.64         |
| FAM65A        | family with sequence simil   | chr16q22.1            | signal transduction                                     | ---                                     | -1.13         | -1.24           | 1.02      | 1.05        | -1.03     | -1.02       | 1.21       | 1.19         | 1.28       | 1.18         | 1.24       | 1.34         |
| FAM69A        | family with sequence simil   | chr1p22.1             | 0                                                       | ---                                     | -1.10         | -1.21           | 1.02      | 1.12        | 1.22      | 1.02        | 1.18       | 1.05         | 1.15       | 1.29         | 1.46       | 1.23         |
| FAM69A        | family with sequence simil   | chr1p22.1             | 0                                                       | ---                                     | 1.10          | 1.05            | 1.25      | -1.01       | 1.39      | 1.34        | -1.05      | -1.39        | 1.09       | 1.21         | 1.29       | 1.07         |
| FAM69B        | family with sequence simil   | chr9q34.3             | 0                                                       | ---                                     | -1.26         | -1.71           | 2.01      | 1.83        | -2.47     | -1.31       | 1.54       | 1.13         | -1.13      | -1.37        | -1.31      | 1.08         |
| FAM72A /// F  | family with sequence simil   | chr1p11.2 /// chr1q20 | 0                                                       | ---                                     | 1.21          | 1.28            | 1.02      | -1.11       | 1.06      | -1.03       | -1.42      | -1.18        | 1.45       | 1.57         | 2.11       | 1.75         |
| FAM76B        | family with sequence simil   | chr11q21              | 0                                                       | ---                                     | 1.25          | -1.00           | 1.33      | 1.11        | 1.27      | -1.29       | 2.19       | 1.59         | 1.52       | 1.28         | 2.53       | 1.72         |
| FAM76B        | family with sequence simil   | chr11q21              | 0                                                       | ---                                     | 1.15          | 1.08            | 1.07      | -1.01       | -1.02     | 1.14        | -1.26      | -1.18        | -1.34      | -1.28        | -1.33      | -1.74        |
| FAM76B        | family with sequence simil   | chr11q21              | 0                                                       | ---                                     | -1.17         | -1.05           | 1.17      | 1.27        | 1.29      | 1.22        | 1.02       | 1.30         | 1.12       | 1.10         | 1.39       | 1.26         |
| FAM76B        | family with sequence simil   | chr11q21              | 0                                                       | ---                                     | 1.04          | 1.18            | -1.03     | -1.17       | -1.07     | 1.03        | -1.35      | -1.37        | -2.01      | -2.06        | -1.76      | -1.96        |
| FAM78A        | family with sequence simil   | chr9q34               | 0                                                       | ---                                     | 1.22          | 1.32            | -1.61     | -1.68       | -1.15     | -1.17       | -1.62      | -1.21        | -1.79      | -2.32        | -1.54      | -1.53        |
| FAM81A        | family with sequence simil   | chr15q22.2            | oxidation-reduction process                             | ---                                     | -1.06         | -1.10           | 1.08      | 1.06        | -1.01     | -1.20       | 1.19       | 1.22         | -1.57      | -1.66        | -2.81      | -3.18        |
| FAM83A        | family with sequence simil   | chr8q24.13            | 0                                                       | ---                                     | -1.11         | -1.23           | 1.12      | 1.09        | 1.10      | -1.00       | -1.01      | 1.05         | 5.42       | 4.71         | 2.10       | 2.94         |
| FAM83A        | family with sequence simil   | chr8q24.13            | 0                                                       | ---                                     | 1.86          | 1.01            | -1.01     | 1.24        | 1.56      | 1.01        | -1.17      | -1.09        | 5.64       | 5.12         | 2.12       | 2.77         |
| FAM83A        | family with sequence simil   | chr8q24.13            | 0                                                       | ---                                     | -1.09         | -1.27           | -1.17     | -1.26       | 1.01      | 1.08        | 1.26       | 1.11         | 2.77       | 3.23         | 1.88       | 2.05         |
| FAM83B        | family with sequence simil   | chr6p12.1             | 0                                                       | ---                                     | 1.09          | 1.15            | -1.00     | -1.27       | -1.15     | -1.03       | -1.21      | -1.14        | 1.14       | 1.27         | 1.17       | 1.25         |
| FAM83B        | family with sequence simil   | chr6p12.1             | 0                                                       | ---                                     | -1.00         | -1.09           | 1.03      | -1.16       | -1.14     | -1.05       | -1.06      | -1.07        | 1.21       | 1.37         | 1.54       | 1.71         |
| FAM83D        | family with sequence simil   | chr20q11.22-q12       | cell cycle                                              | ---                                     | 1.16          | 1.13            | 1.13      | 1.04        | -1.04     | 1.03        | -1.25      | -1.18        | 1.05       | 1.11         | 1.42       | 1.22         |
| FAM83G        | family with sequence simil   | chr17p11.2            | 0                                                       | ---                                     | 1.07          | -1.03           | -1.08     | 1.01        | -1.06     | -1.14       | 1.16       | 1.15         | 1.69       | 1.61         | 1.53       | 1.56         |
| FAM83H        | family with sequence simil   | chr8q24.3             | biomineral tissue development                           | ---                                     | 1.23          | -2.78           | 1.59      | 2.71        | -2.54     | -4.74       | -1.50      | -3.59        | -1.49      | -1.99        | -2.93      | 1.11         |
| FAM83H        | family with sequence simil   | chr8q24.3             | biomineral tissue development                           | ---                                     | -1.10         | -1.07           | -1.04     | -1.01       | -1.02     | -1.05       | 1.04       | 1.10         | -1.02      | -1.04        | -1.00      | ---          |
| FAM84A        | family with sequence simil   | chr2p24.3             | 0                                                       | ---                                     | 1.11          | 1.17            | 1.05      | 1.31        | 1.01      | 1.26        | -2.13      | -1.20        | -1.68      | -2.27        | -1.33      | -1.57        |
| FAM84A        | family with sequence simil   | chr2p24.3             | 0                                                       | ---                                     | 1.16          | -1.01           | 1.15      | 1.22        | -1.20     | 1.06        | -1.92      | -1.33        | -5.28      | -2.89        | -6.00      | -5.81        |
| FAM84A        | family with sequence simil   | chr2p24.3             | 0                                                       | ---                                     | 1.17          | 1.07            | 1.20      | 1.41        | -1.78     | -1.79       | -1.75      | -1.44        | -2.75      | -2.81        | -4.22      | -5.39        |
| FAM84A        | family with sequence simil   | chr2p24.3             | 0                                                       | ---                                     | -2.22         | -2.02           | -1.02     | 1.12        | -1.10     | 1.77        | -1.09      | -1.42        | -2.64      | -3.23        | -3.96      | -3.21        |
| FAM84A /// F  | family with sequence simil   | chr2p24.3             | 0                                                       | ---                                     | -1.05         | 1.55            | 1.95      | 1.08        | 1.52      | -1.88       | -1.64      | 1.67         | -1.79      | -1.25        | -3.50      | -5.20        |
| FAM86B1 ///   | family with sequence simil   | chr11q13.4 /// chr12  | 0                                                       | ---                                     | -1.13         | -1.08           | -1.06     | 1.00        | 1.03      | -1.09       | 1.06       | 1.09         | -1.23      | -1.35        | -1.46      | -1.25        |
| FAM86C1       | family with sequence simil   | chr11q13.4            | 0                                                       | ---                                     | -1.07         | -1.02           | -1.06     | 1.09        | 1.05      | -1.03       | 1.10       | -1.02        | 1.04       | -1.01        | -1.19      | -1.22        |
| FAM89A /// B  | family with sequence simil   | chr1q42.2             | 0                                                       | ---                                     | -2.20         | -1.29           | 2.15      | 1.41        | -1.18     | 1.30        | 1.95       | -1.19        | 4.49       | 3.40         | 3.09       | 2.98         |
| FAM8A1        | family with sequence simil   | chr6p23               | 0                                                       | ---                                     | 1.04          | -1.02           | 1.02      | -1.06       | 1.06      | 1.13        | -1.14      | -1.10        | -1.40      | 1.02         | -1.31      | -1.14        |
| FAM92A1       | family with sequence simil   | chr8q22.1             | 0                                                       | ---                                     | -1.03         | -1.09           | 1.12      | 1.15        | 1.14      | 1.17        | 1.11       | -1.11        | -1.28      | -1.13        | -1.24      | -1.30        |
| FAM92A1       | family with sequence simil   | chr8q22.1             | 0                                                       | ---                                     | 1.05          | 1.12            | 1.15      | 1.21        | 1.10      | 1.04        | -1.27      | 1.04         | -1.85      | -1.60        | -1.51      | -1.55        |
| FAM96A        | family with sequence simil   | chr15q22.31           | chromosome segregation                                  | ---                                     | 1.04          | 1.06            | -1.00     | -1.09       | 1.03      | 1.03        | -1.15      | -1.17        | -1.12      | -1.09        | -1.15      | -1.26        |
| FAM96B        | family with sequence simil   | chr16q22.1            | chromosome segregation                                  | ---                                     | 1.10          | 1.03            | 1.06      | -1.02       | 1.13      | 1.04        | 1.03       | -1.10        | 1.36       | 1.22         | 1.39       | 1.26         |
| FAM98A        | family with sequence simil   | chr2p22.3             | 0                                                       | ---                                     | -1.10         | -1.19           | -1.15     | -1.15       | -1.04     | -1.04       | -1.51      | -1.05        | -1.43      | -1.54        | -3.20      | -2.03        |
| FAM98A        | family with sequence simil   | chr2p22.3             | 0                                                       | ---                                     | -1.05         | 1.02            | -1.06     | 1.06        | 1.02      | -1.01       | -1.09      | 1.00         | 1.12       | 1.09         | 1.06       | 1.14         |
| FAM98B        | family with sequence simil   | chr15q14              | 0                                                       | ---                                     | 1.04          | 1.09            | -1.00     | 1.02        | -1.04     | -1.01       | -1.23      | -1.11        | -1.26      | -1.11        | -1.32      | -1.24        |
| FAM9B         | family with sequence simil   | chrXp22.32            | 0                                                       | ---                                     | 3.71          | 2.21            | -1.38     | 1.13        | 1.12      | 2.28        | -3.96      | -1.62        | 1.20       | 2.51         | -7.87      | -4.70        |
| FAM9B         | family with sequence simil   | chrXp22.32            | 0                                                       | ---                                     | 1.50          | 1.12            | -1.47     | -1.08       | -1.00     | -1.15       | -1.03      | -1.17        | 1.12       | 1.04         | -1.61      | -1.94        |
| FAM9C         | family with sequence simil   | chrXp22.2             | 0                                                       | ---                                     | 3.14          | 3.43            | -1.37     | 1.83        | -1.19     | 1.21        | -1.38      | -1.08        | 1.72       | 2.04         | -1.03      | 1.27         |
| FAN1          | FANCD2/FANCI-associate       | chr15q13.2-q13.3      | double-strand break repair via homologous recombination | ---                                     | 1.02          | 1.26            | 1.25      | 1.14        | 1.06      | -1.12       | 1.35       | 1.28         | -1.80      | -1.96        | -1.38      | -2.00        |
| FANCA         | Fanconi anemia, compleme     | chr16q24.3            | DNA repair                                              | ---                                     | 1.02          | -1.11           | 1.16      | 1.31        | -1.05     | -1.03       | 1.33       | 1.27         | 1.71       | 1.51         | 1.77       | 1.52         |
| FANCA         | Fanconi anemia, compleme     | chr16q24.3            | DNA repair                                              | ---                                     | -1.10         | -1.16           | -1.03     | 1.06        | 1.08      | -1.01       | 1.08       | 1.14         | -1.31      | -1.47        | -1.38      | -1.14        |
| FANCA         | Fanconi anemia, compleme     | chr16q24.3            | DNA repair                                              | ---                                     | -1.03         | 1.08            | -1.01     | 1.10        | -1.01     | -1.31       | 1.00       | 1.15         | -1.79      | -2.35        | -1.92      | -1.89        |
| FANCB         | Fanconi anemia, compleme     | chrXp22.2             | DNA repair                                              | ---                                     | 1.15          | 1.15            | -1.03     | 1.08        | 1.04      | 1.06        | -1.02      | -1.04        | -1.86      | -1.49        | -1.34      | -1.24        |
| FANCC         | Fanconi anemia, compleme     | chr9q23.3             | myeloid cell homeostasis                                | ---                                     | -1.17         | -1.25           | -1.26     | -1.41       | -1.28     | -1.13       | 1.06       | 1.90         | -2.50      | -1.27        | 1.45       | 2.46         |
| FANCD2        | Fanconi anemia, compleme     | chr3p26               | DNA repair                                              | ---                                     | 1.01          | 1.03            | -1.04     | 1.00        | 1.11      | -1.09       | 1.11       | -1.07        | -1.24      | -1.19        | -1.49      | -1.34        |
| FANCD2        | Fanconi anemia, compleme     | chr3p26               | DNA repair                                              | ---                                     | 1.04          | -1.02           | 1.02      | 1.08        | -1.03     | 1.03        | -1.08      | -1.10        | -1.20      | -1.13        | -1.33      | -1.29        |
| FANCF         | Fanconi anemia, compleme     | chr11p15              | DNA repair                                              | ---                                     | 1.01          | -1.05           | -1.13     | -1.13       | -1.02     | 1.06        | -1.16      | 1.01         | -1.78      | -1.36        | -1.84      | -1.66        |
| FANCG         | Fanconi anemia, compleme     | chr9p13               | cell cycle checkpoint                                   | ---                                     | 1.01          | 1.02            | -1.02     | -1.01       | 1.12      | 1.12        | -1.09      | -1.16        | -1.22      | -1.06        | -1.35      | -1.27        |
| FANCI         | Fanconi anemia, compleme     | chr15q26.1            | DNA repair                                              | ---                                     | 1.14          | 1.18            | 1.00      | 1.00        | -1.06     | -1.02       | -1.01      | -1.05        | -1.17      | -1.24        | -1.19      | -1.30        |
| FANCI         | Fanconi anemia, compleme     | chr15q26.1            | DNA repair                                              | ---                                     | 1.00          | -1.01           | 1.01      | 1.11        | -1.04     | -1.07       | 1.15       | 1.11         | 1.47       | 1.46         | -1.28      | -1.11        |
| FANCL         | Fanconi anemia, compleme     | chr2p16.1             | DNA repair                                              | ---                                     | 1.06          | 1.07            | -1.06     | 1.14        | 1.04      | 1.08        | -1.07      | -1.02        | -1.27      | -1.13        | -1.37      | -1.38        |
| FANCM         | Fanconi anemia, compleme     | chr14q21.2            | resolution of meiotic recombination intermediate        | ---                                     | -1.41         | -1.42           | 1.10      | 1.05        | 1.05      | -1.09       | 1.26       | 1.37         | 1.03       | -1.03        | 1.79       | 1.22         |
| FANCM         | Fanconi anemia, compleme     | chr14q21.2            | resolution of meiotic recombination intermediate        | ---                                     | 1.24          | 1.27            | 1.32      | -1.52       | 1.12      | -1.31       | -1.31      | -1.31        | -1.56      | -1.18        | 1.15       | 1.07         |
| FANCM         | Fanconi anemia, compleme     | chr14q21.2            | resolution of meiotic recombination intermediate        | ---                                     | 1.47          | 1.39            | 1.32      | 1.42        | -1.04     | 1.19        | -1.03      | 1.04         | -1.35      | -1.24        | -1.08      | 1.29         |
| FANCM         | Fanconi anemia, compleme     | chr14q21.2            | resolution of meiotic recombination intermediate        | ---                                     | 1.13          | 1.09            | -1.07     | -1.02       | -1.00     | 1.05        | -1.35      | -1.07        | -1.33      | -1.17        | 1.08       | 1.08         |
| FAP           | fibroblast activation protei | chr2q23               | proteolysis                                             | ---                                     | 1.05          | 1.29            | -1.06     | 1.02        | -1.24     | 1.01        | 1.08       | 1.19         | -1.29      | -1.37        | -1.29      | -1.17        |
| FAR1          | fatty acyl CoA reductase 1   | chr11p15.2            | lipid metabolic process                                 | ---                                     | 1.37          | 1.18            | 1.03      | 1.10        | 1.41      | 1.71        | -1.17      | -1.29        | -1.17      | -1.01        | -1.04      | -1.18        |
| FAR1          | fatty acyl CoA reductase 1   | chr11p15.2            | lipid metabolic process                                 | ---                                     | 1.44          | 1.37            | 1.06      | 1.04        | -1.05     | 1.24        | -1.50      | -1.33        | -1.78      | -1.75        | -1.47      | -1.74        |
| FAR2          | fatty acyl CoA reductase 2   | chr12p11.22           | lipid metabolic process                                 | ---                                     | -1.00         | -1.05           | 1.11      | -1.04       | 1.02      | 1.14        | -1.29      | -1.26        | -1.34      | -1.16        | -1.84      | -1.83        |
| FARP1 /// FAR | FERM, RhoGEF (ARHGEF)        | chr13q32.2            | multicellular organismal development                    | ---                                     | 1.02          | -1.01           | 1.02      | 1.06        | 1.05      | 1.01        | -1.02      | 1.01         | -1.32      | -1.29        | -1.55      | -1.50        |
| FARS2         | phenylalanyl-tRNA synthet    | chr6p25.1             | translation                                             | ---                                     | -1.16         | -1.12           | -1.06     | 1.26        | -1.13     | -1.17       | -1.03      | 1.35         | -1.09      | -1.25        | -1.64      | -1.21        |
| FAS           | Fas cell surface death rece  | chr10q24.1            | response to hypoxia                                     | Apoptosis // GenMAPP /// Apoptosis_GenM | 1.00          | -1.03           | 1.08      | -1.01       | 1.04      | -1.05       | 1.19       | 1.11         | 1.59       | 1.35         | 1.74       | 1.32         |

| ID           | Gene Title                       | Chromosomal Location | 1st Gene Ontology Biological Process                             | Pathway                                 | A2497 30 mins | A2497P' 30 mins | A2497 2 h | A2497P' 2 h | A2497 4 h | A2497P' 4 h | A2497 24 h | A2497P' 24 h | A2497 48 h | A2497P' 48 h | A2497 72 h | A2497P' 72 h |
|--------------|----------------------------------|----------------------|------------------------------------------------------------------|-----------------------------------------|---------------|-----------------|-----------|-------------|-----------|-------------|------------|--------------|------------|--------------|------------|--------------|
| FAS          | Fas cell surface death receptor  | chr10q24.1           | response to hypoxia                                              | Apoptosis // GenMAPP /// Apoptosis_GenM | 1.57          | 1.34            | 1.26      | 1.07        | -1.08     | -1.10       | 1.10       | -1.04        | 1.40       | 1.22         | 1.77       | 1.29         |
| FAS          | Fas cell surface death receptor  | chr10q24.1           | response to hypoxia                                              | Apoptosis // GenMAPP /// Apoptosis_GenM | 1.07          | 1.03            | -1.06     | -1.11       | -1.01     | -1.04       | -1.01      | 1.04         | 1.52       | 1.23         | 1.54       | 1.19         |
| FAS          | Fas cell surface death receptor  | chr10q24.1           | response to hypoxia                                              | Apoptosis // GenMAPP /// Apoptosis_GenM | 1.43          | 1.11            | -1.15     | -1.27       | 1.16      | 1.03        | 1.02       | -1.18        | 1.15       | 1.11         | 1.57       | 1.04         |
| FASN         | fatty acid synthase              | chr17q25             | acetyl-CoA metabolic process                                     | Fatty_Acid_Synthesis // GenMAPP         | 1.04          | -1.00           | 1.09      | 1.17        | -1.05     | -1.06       | -1.06      | -1.03        | 1.30       | 1.31         | 2.07       | 2.59         |
| FASTKD2      | FAST kinase domains 2            | chr2q33.3            | protein phosphorylation                                          | ---                                     | 1.04          | 1.09            | 1.09      | 1.04        | 1.07      | 1.03        | -1.18      | -1.09        | -1.11      | -1.11        | -1.52      | -1.25        |
| FASTKD2      | FAST kinase domains 2            | chr2q33.3            | protein phosphorylation                                          | ---                                     | -1.01         | -1.09           | 1.09      | 1.14        | 1.04      | -1.02       | 1.23       | 1.01         | 1.11       | 1.04         | 1.33       | 1.30         |
| FASTKD3      | FAST kinase domains 3            | chr5p15.31           | protein phosphorylation                                          | ---                                     | 1.14          | 1.11            | 1.08      | 1.06        | 1.05      | 1.01        | -1.06      | -1.05        | -1.23      | -1.28        | -1.09      | -1.18        |
| FASTKD5      | FAST kinase domains 5            | chr20p13             | protein phosphorylation                                          | ---                                     | -1.20         | -1.22           | 1.02      | 1.20        | -1.08     | -1.13       | -1.26      | 1.05         | 1.06       | -1.12        | 1.01       | 1.22         |
| FAT2         | FAT atypical cadherin 2          | chr5q33.1            | cell adhesion                                                    | ---                                     | -1.45         | -1.22           | 1.35      | 1.13        | 1.62      | -4.50       | 3.22       | 1.44         | 4.57       | 2.98         | -2.44      | -1.02        |
| FAT4         | FAT atypical cadherin 4          | chr4q28.1            | cell adhesion                                                    | ---                                     | 1.35          | 1.34            | -1.02     | -1.51       | -1.28     | -1.00       | -1.43      | -1.20        | -2.97      | -3.10        | -3.23      | -3.92        |
| FAXC         | failed axon connections homolog  | chr6q16.2            | 0                                                                | ---                                     | -1.10         | 1.00            | -1.14     | 1.01        | 1.05      | -1.01       | 1.01       | -1.25        | -2.02      | -1.76        | -1.25      | -1.32        |
| FAXC         | failed axon connections homolog  | chr6q16.2            | 0                                                                | ---                                     | 1.29          | 1.35            | -1.65     | -1.72       | 1.28      | 2.89        | -1.39      | -1.35        | -1.50      | -2.22        | -1.76      | -2.45        |
| FBF1         | Fas (TNFRSF6) binding factor     | chr17q25.1           | cell projection organization                                     | ---                                     | -1.13         | 1.14            | 1.15      | 1.75        | 1.64      | 1.36        | 1.08       | 1.08         | -2.13      | -1.77        | -3.28      | -1.70        |
| FBF1         | Fas (TNFRSF6) binding factor     | chr17q25.1           | cell projection organization                                     | ---                                     | -1.02         | 1.03            | 1.03      | 1.60        | -1.04     | 1.02        | 1.43       | 1.55         | -1.01      | 1.00         | -1.80      | -1.40        |
| FBLN1        | fibulin 1                        | chr22q13.31          | embryo implantation                                              | ---                                     | -1.08         | -1.07           | 1.02      | 1.10        | 1.07      | -1.08       | 1.13       | -1.03        | -1.32      | -1.15        | -1.63      | -1.24        |
| FBLN1        | fibulin 1                        | chr22q13.31          | embryo implantation                                              | ---                                     | -1.05         | -1.01           | -1.05     | 1.05        | -1.01     | -1.07       | 1.07       | -1.01        | -1.08      | -1.04        | -1.29      | -1.15        |
| FBLN5        | fibulin 5                        | chr14q32.1           | regulation of cell growth                                        | ---                                     | -1.08         | -1.11           | 1.64      | 1.89        | -1.03     | 1.11        | -1.33      | -1.06        | 1.33       | 1.44         | 1.13       | 1.47         |
| FBN1         | fibrillin 1                      | chr15q21.1           | skeletal system development                                      | ---                                     | 1.05          | -1.01           | 1.03      | -1.02       | 1.03      | -1.00       | 1.03       | -1.01        | -1.76      | -1.47        | -2.14      | -2.00        |
| FBN2         | fibrillin 2                      | chr5q23-q31          | anatomical structure morphogenesis                               | ---                                     | 1.50          | 1.33            | -1.16     | -1.02       | 1.11      | 1.20        | 1.03       | -1.05        | 3.39       | 3.73         | 3.31       | 3.45         |
| FBP2         | fructose-1,6-bisphosphatase      | chr9q22.3            | carbohydrate metabolic process                                   | Glycolysis and_Gluconeogenesis // GenMA | -1.44         | -2.97           | -1.67     | -1.28       | -1.14     | 1.59        | 1.84       | -1.17        | 3.34       | -1.11        | 1.97       | -1.53        |
| FBRS         | fibrosin                         | chr16p11.2           | positive regulation of fibroblast proliferation                  | ---                                     | -1.08         | -1.13           | 1.06      | 1.12        | -1.04     | -1.02       | 1.05       | 1.33         | 1.22       | 1.11         | 1.09       | 1.15         |
| FBRL1        | fibrosin-like 1                  | chr12q24.33          | 0                                                                | ---                                     | 1.14          | -1.01           | 1.04      | 1.39        | 1.15      | 1.05        | -1.12      | -1.21        | 1.19       | -1.54        | -1.42      | -1.28        |
| FBRL1        | fibrosin-like 1                  | chr12q24.33          | 0                                                                | ---                                     | 1.09          | 1.00            | 1.01      | -1.09       | -1.05     | -1.04       | -1.25      | -1.20        | -1.16      | -1.23        | 1.10       | 1.14         |
| FBXL14       | F-box and leucine-rich repeat    | chr12p13.33          | protein ubiquitination involved in ubiquitination                | ---                                     | -1.39         | -1.67           | -1.14     | 1.02        | -1.75     | -1.01       | 1.54       | -1.52        | 1.81       | 1.47         | 1.79       | 2.49         |
| FBXL14       | F-box and leucine-rich repeat    | chr12p13.33          | protein ubiquitination involved in ubiquitination                | ---                                     | 4.88          | 3.83            | -1.67     | -1.52       | 1.24      | -1.56       | 3.31       | 1.28         | 1.09       | 1.08         | 1.70       | 1.76         |
| FBXL17       | F-box and leucine-rich repeat    | chr5q21.3            | 0                                                                | ---                                     | -1.09         | -1.14           | 1.08      | -1.03       | 1.12      | 1.15        | 1.01       | -1.43        | -1.19      | -1.58        | -1.57      | ---          |
| FBXL17       | F-box and leucine-rich repeat    | chr5q21.3            | 0                                                                | ---                                     | 1.09          | 1.16            | -1.10     | -1.05       | -1.04     | -1.28       | -1.22      | -1.50        | -1.16      | -1.30        | -3.55      | -2.62        |
| FBXL2        | F-box and leucine-rich repeat    | chr3p22.3            | cellular protein modification process                            | ---                                     | 1.46          | 1.04            | -1.93     | -1.92       | -1.32     | -1.24       | 1.48       | 1.41         | -1.50      | 1.18         | -2.17      | -1.66        |
| FBXL20       | F-box and leucine-rich repeat    | chr17q12             | 0                                                                | ---                                     | -1.07         | -1.11           | 1.11      | -1.14       | -1.05     | 1.12        | 1.24       | 1.08         | -1.90      | -1.64        | -1.22      | -1.59        |
| FBXL20       | F-box and leucine-rich repeat    | chr17q12             | 0                                                                | ---                                     | 1.68          | 1.08            | 1.14      | 1.07        | 1.01      | -1.18       | -1.07      | -1.61        | -1.93      | -1.96        | -2.70      | ---          |
| FBXL20       | F-box and leucine-rich repeat    | chr17q12             | 0                                                                | ---                                     | 1.33          | 1.21            | -1.09     | -1.08       | 1.14      | 1.15        | 1.07       | 1.14         | -1.79      | -1.80        | -1.56      | -1.67        |
| FBXL20       | F-box and leucine-rich repeat    | chr17q12             | 0                                                                | ---                                     | -1.01         | 1.03            | 1.07      | -1.18       | 1.02      | -1.03       | 1.04       | 1.04         | -1.23      | -1.16        | -1.14      | -1.12        |
| FBXL3        | F-box and leucine-rich repeat    | chr13q22             | protein ubiquitination                                           | ---                                     | 1.25          | 1.20            | 1.02      | -1.08       | -1.09     | 1.05        | -1.18      | -1.10        | -1.57      | -1.31        | -1.05      | -1.56        |
| FBXO16 /// Z | F-box protein 16 /// zinc finger | chr8p21.1            | transcription, DNA-dependent                                     | ---                                     | 1.35          | 1.54            | -1.12     | -1.56       | 2.02      | 1.65        | 1.59       | -1.20        | -1.01      | 1.16         | 1.20       | 1.16         |
| FBXO16 /// Z | F-box protein 16 /// zinc finger | chr8p21.1            | transcription, DNA-dependent                                     | ---                                     | -1.61         | -1.05           | 1.30      | -1.05       | 1.38      | 1.40        | 1.66       | -1.08        | 1.82       | 1.98         | -1.08      | 1.16         |
| FBXO17       | F-box protein 17                 | chr19q13.2           | protein catabolic process                                        | ---                                     | -1.10         | -1.05           | 1.20      | 1.45        | 1.01      | 1.06        | 1.10       | 1.16         | 1.18       | 1.13         | -1.65      | -1.34        |
| FBXO18       | F-box protein, helicase, 18      | chr10p15.1           | 0                                                                | ---                                     | -1.38         | -1.31           | -1.86     | -2.08       | -1.79     | -2.09       | -1.36      | -1.67        | 2.24       | 1.62         | 2.34       | 2.23         |
| FBXO2        | F-box protein 2                  | chr1p36.22           | cellular protein modification process                            | ---                                     | 1.14          | 1.15            | 1.01      | -1.12       | -1.29     | -1.11       | 1.28       | 1.08         | 1.10       | 1.11         | 1.35       | 1.39         |
| FBXO21       | F-box protein 21                 | chr12q24.22          | ubiquitin-dependent protein catabolic process                    | ---                                     | -1.02         | -1.11           | -1.22     | 1.06        | -1.27     | -1.03       | 1.16       | 1.24         | -2.11      | -1.47        | -1.44      | -1.19        |
| FBXO21       | F-box protein 21                 | chr12q24.22          | ubiquitin-dependent protein catabolic process                    | ---                                     | 1.23          | 1.19            | 1.09      | -1.01       | -1.03     | 1.01        | 1.11       | -1.05        | -1.30      | -1.27        | -1.10      | -1.31        |
| FBXO22       | F-box protein 22                 | chr15q24.2           | protein polyubiquitination                                       | ---                                     | 1.72          | 1.43            | 1.01      | -1.21       | 1.28      | 1.41        | -1.04      | -1.05        | 1.71       | 1.57         | 1.79       | 1.62         |
| FBXO22       | F-box protein 22                 | chr15q24.2           | protein polyubiquitination                                       | ---                                     | 1.02          | -1.02           | -1.12     | 1.03        | -1.43     | -1.10       | -1.12      | -1.17        | 1.12       | 1.32         | 1.15       | 1.16         |
| FBXO22       | F-box protein 22                 | chr15q24.2           | protein polyubiquitination                                       | ---                                     | 1.03          | -1.06           | 1.12      | 1.18        | -1.02     | 1.01        | 1.27       | 1.12         | 1.90       | 1.83         | 1.78       | 1.83         |
| FBXO22       | F-box protein 22                 | chr15q24.2           | protein polyubiquitination                                       | ---                                     | -1.08         | -1.13           | 1.05      | 1.13        | 1.02      | -1.01       | 1.47       | 1.23         | 2.21       | 2.07         | 1.85       | 1.93         |
| FBXO28       | F-box protein 28                 | chr1q42.11           | 0                                                                | ---                                     | 1.18          | 1.15            | 1.06      | -1.00       | -1.09     | 1.07        | -1.21      | -1.05        | -1.68      | -1.89        | -1.05      | -1.28        |
| FBXO28       | F-box protein 28                 | chr1q42.11           | 0                                                                | ---                                     | 1.20          | 1.17            | 1.07      | -1.02       | -1.02     | 1.09        | 1.04       | -1.05        | -1.74      | -1.85        | -1.27      | -1.52        |
| FBXO28       | F-box protein 28                 | chr1q42.11           | 0                                                                | ---                                     | -1.17         | -1.09           | -1.25     | -1.05       | -1.49     | 1.00        | -1.02      | 1.27         | -1.31      | -1.22        | -1.33      | -1.37        |
| FBXO28       | F-box protein 28                 | chr1q42.11           | 0                                                                | ---                                     | 1.07          | 1.11            | 1.04      | -1.01       | -1.06     | 1.03        | -1.35      | -1.26        | -1.40      | -1.29        | 1.24       | 1.32         |
| FBXO3        | F-box protein 3                  | chr11p13             | proteolysis                                                      | ---                                     | 1.19          | 1.18            | -1.06     | -1.02       | -1.05     | 1.08        | -1.12      | -1.03        | -2.57      | -1.77        | -2.00      | -3.04        |
| FBXO3        | F-box protein 3                  | chr11p13             | proteolysis                                                      | ---                                     | 2.05          | 1.77            | 1.67      | 2.07        | 1.76      | 2.51        | 1.79       | 1.99         | 2.00       | 1.87         | -2.32      | -1.39        |
| FBXO3        | F-box protein 3                  | chr11p13             | proteolysis                                                      | ---                                     | 1.17          | 1.15            | 1.03      | -1.13       | -1.09     | 1.00        | -1.40      | -1.18        | -1.59      | -1.30        | -1.66      | -1.90        |
| FBXO3        | F-box protein 3                  | chr11p13             | proteolysis                                                      | ---                                     | 1.26          | 1.00            | 1.20      | 1.04        | -1.20     | -1.01       | -1.37      | 1.02         | -1.81      | -1.17        | -1.88      | -2.36        |
| FBXO31       | F-box protein 31                 | chr16q24.2           | response to DNA damage stimulus                                  | ---                                     | -1.23         | -1.32           | -1.19     | -1.15       | 1.23      | 1.13        | 1.40       | 1.26         | -1.07      | -1.18        | 1.23       | 1.42         |
| FBXO32       | F-box protein 32                 | chr8q24.13           | response to denervation involved in regulation of muscle atrophy | ---                                     | -1.00         | -1.13           | 1.04      | 1.29        | -1.12     | 1.01        | 1.02       | -1.03        | -1.84      | -1.48        | -1.80      | -1.14        |
| FBXO32       | F-box protein 32                 | chr8q24.13           | response to denervation involved in regulation of muscle atrophy | ---                                     | -1.21         | 1.11            | -1.22     | 1.11        | 3.40      | 4.82        | 2.22       | 2.64         | 1.27       | -1.01        | 2.45       | 11.22        |
| FBXO32       | F-box protein 32                 | chr8q24.13           | muscle atrophy                                                   | ---                                     | -1.24         | -1.22           | 1.06      | 1.06        | -1.11     | -1.02       | 1.23       | 1.32         | -1.84      | -1.61        | 1.38       | 1.41         |
| FBXO34       | F-box protein 34                 | chr14q22.3           | 0                                                                | ---                                     | 1.35          | 1.24            | 1.02      | -1.15       | -1.08     | -1.16       | -1.03      | -1.01        | 1.02       | 1.23         | 1.31       | 1.16         |
| FBXO36       | F-box protein 36                 | chr2q36.3            | 0                                                                | ---                                     | -1.07         | 1.04            | -1.18     | -1.03       | 1.12      | -1.05       | 1.56       | 1.10         | 2.10       | 1.73         | 2.46       | 2.53         |
| FBXO38       | F-box protein 38                 | chr5q32              | 0                                                                | ---                                     | -1.03         | -1.10           | -1.05     | -1.02       | 1.04      | 1.01        | -1.22      | -1.11        | -1.03      | 1.03         | 1.34       | 1.35         |
| FBXO38       | F-box protein 38                 | chr5q32              | 0                                                                | ---                                     | 1.07          | 1.06            | -1.05     | 1.10        | -1.04     | 1.14        | -1.19      | 1.09         | -1.08      | 1.06         | 1.11       | 1.27         |
| FBXO38       | F-box protein 38                 | chr5q32              | 0                                                                | ---                                     | -1.08         | -1.09           | 1.32      | 1.06        | 1.24      | 1.22        | 1.14       | -1.01        | 1.11       | 1.15         | 1.53       | 1.68         |
| FBXO4        | F-box protein 4                  | chr5p12              | protein polyubiquitination                                       | ---                                     | 1.10          | 1.27            | -1.00     | -1.18       | -1.02     | -1.05       | -1.21      | -1.12        | -1.60      | -1.65        | -1.34      | -1.83        |
| FBXO42       | F-box protein 42                 | chr1p36.23-p36.11    | 0                                                                | ---                                     | 1.09          | 1.15            | -1.10     | -1.04       | -1.16     | -1.08       | 1.51       | 1.38         | 1.34       | 1.25         | 1.26       | 1.57         |
| FBXO42       | F-box protein 42                 | chr1p36.23-p36.11    | 0                                                                | ---                                     | -1.05         | 1.16            | 1.14      | -1.02       | -1.01     | 1.01        | -1.09      | -1.05        | -1.35      | -1.23        | -1.26      | -1.33        |
| FBXO45       | F-box protein 45                 | chr3q29              | response to DNA damage stimulus                                  | ---                                     | -1.06         | -1.05           | 1.05      | -1.27       | -1.02     | -1.06       | 1.30       | 1.05         | 2.05       | 1.79         | 2.80       | 2.22         |
| FBXO45       | F-box protein 45                 | chr3q29              | response to DNA damage stimulus                                  | ---                                     | 1.02          | 1.07            | 1.12      | -1.11       | 1.01      | -1.03       | 1.03       | 1.01         | 1.12       | 1.13         | 1.37       | 1.29         |

| ID       | Gene Title                                | Chromosomal Location | 1st Gene Ontology Biological Process             | Pathway                             | A2497 30 mins | A2497P' 30 mins | A2497 2 h | A2497P' 2 h | A2497 4 h | A2497P' 4 h | A2497 24 h | A2497P' 24 h | A2497 48 h | A2497P' 48 h | A2497 72 h | A2497P' 72 h |
|----------|-------------------------------------------|----------------------|--------------------------------------------------|-------------------------------------|---------------|-----------------|-----------|-------------|-----------|-------------|------------|--------------|------------|--------------|------------|--------------|
| FBX06    | F-box protein 6                           | chr1p36.22           | DNA damage checkpoint                            | ---                                 | 1.11          | -1.30           | -1.94     | -1.16       | -1.04     | -1.05       | 1.03       | 1.08         | 2.08       | 1.67         | 2.76       | 1.58         |
| FBX09    | F-box protein 9                           | chr6p12.3-p11.2      | protein ubiquitination                           | ---                                 | -1.11         | -1.10           | 1.04      | -1.06       | -1.15     | -1.02       | -1.59      | -1.14        | -1.09      | 1.02         | -1.88      | -1.51        |
| FBX09    | F-box protein 9                           | chr6p12.3-p11.2      | protein ubiquitination                           | ---                                 | 1.02          | -1.08           | -1.08     | -1.39       | 1.07      | -1.39       | -1.12      | -1.49        | -1.29      | -1.17        | -3.23      | -2.19        |
| FBX09    | F-box protein 9                           | chr6p12.3-p11.2      | protein ubiquitination                           | ---                                 | -1.05         | -1.03           | 1.03      | 1.04        | 1.09      | 1.05        | -1.28      | -1.09        | -1.81      | -1.87        | -1.73      | -1.62        |
| FBX09    | F-box protein 9                           | chr6p12.3-p11.2      | protein ubiquitination                           | ---                                 | -1.03         | 1.03            | -1.05     | -1.02       | -1.10     | 1.01        | -1.17      | -1.09        | -1.49      | -1.52        | -1.58      | -1.66        |
| FBX09    | F-box protein 9                           | chr6p12.3-p11.2      | protein ubiquitination                           | ---                                 | 1.16          | 1.32            | 1.11      | 1.19        | 1.03      | 1.15        | 1.03       | -1.03        | -2.82      | -2.45        | -2.63      | -2.20        |
| FBX09    | F-box protein 9                           | chr6p12.3-p11.2      | protein ubiquitination                           | ---                                 | 1.33          | 1.35            | 1.44      | 1.32        | 1.28      | 1.36        | -1.10      | -1.40        | -1.87      | -2.29        | -2.27      | -2.20        |
| FBX09    | F-box protein 9                           | chr6p12.3-p11.2      | protein ubiquitination                           | ---                                 | -1.13         | -1.09           | 1.09      | 1.14        | 1.01      | -1.01       | -1.19      | -1.04        | -1.33      | -1.57        | -1.80      | -1.71        |
| FBXW2    | F-box and WD repeat domain                | chr9q34              | cellular protein modification process            | Wnt_signaling // GenMAPP            | 1.19          | 1.07            | 1.13      | 1.05        | 1.02      | -1.26       | -1.31      | -1.20        | -1.76      | -2.52        | -2.47      | -2.47        |
| FBXW2    | F-box and WD repeat domain                | chr9q34              | cellular protein modification process            | Wnt_signaling // GenMAPP            | -1.16         | -1.05           | -1.03     | -1.07       | 1.01      | -1.10       | -1.01      | 1.14         | -1.20      | 1.03         | -1.58      | -1.51        |
| FBXW2    | F-box and WD repeat domain                | chr9q34              | cellular protein modification process            | Wnt_signaling // GenMAPP            | 1.01          | -1.18           | -1.03     | 1.01        | 1.01      | 1.02        | 1.07       | -1.16        | -1.24      | -1.17        | 1.27       | 1.27         |
| FBXW2    | F-box and WD repeat domain                | chr9q34              | cellular protein modification process            | Wnt_signaling // GenMAPP            | -1.02         | -1.07           | 1.06      | 1.05        | 1.23      | 1.08        | 1.28       | 1.13         | 1.32       | 1.19         | 1.40       | 1.46         |
| FBXW5    | F-box and WD repeat domain                | chr9q34.3            | mitosis                                          | ---                                 | 1.11          | 1.01            | 1.09      | 1.18        | 1.02      | 1.06        | 1.03       | 1.01         | 1.36       | 1.24         | 1.10       | 1.27         |
| FCAR     | Fc fragment of IgA, receptor              | chr19q13.42          | immune response                                  | ---                                 | 1.19          | 1.36            | -1.69     | -1.32       | 5.91      | 1.63        | 5.72       | 5.05         | 11.15      | 1.72         | 1.91       | 4.64         |
| FCER1G   | Fc fragment of IgE, high affinity         | chr1q23              | positive regulation of type IIa hypersensitivity | ---                                 | 3.05          | 5.55            | 1.46      | 1.23        | 1.32      | 1.04        | 4.13       | 3.82         | 7.24       | 8.05         | 1.12       | 1.81         |
| FCER1G   | Fc fragment of IgE, high affinity         | chr1q23              | positive regulation of type IIa hypersensitivity | ---                                 | 1.29          | -1.12           | -1.15     | 1.28        | -1.13     | 1.03        | -1.01      | -1.17        | -1.22      | -1.16        | 1.15       | 1.68         |
| FCF1     | FCF1 rRNA-processing protein              | chr14q24.3           | rRNA processing                                  | ---                                 | 1.18          | 1.16            | 1.12      | 1.02        | -1.23     | -1.08       | -1.09      | 1.02         | -1.27      | -1.32        | -2.76      | -2.92        |
| FCGR2A   | Fc fragment of IgG, low affinity          | chr1q23              | immune response                                  | ---                                 | 1.07          | -1.16           | 1.61      | 1.01        | 1.04      | 1.47        | -1.73      | -1.26        | 2.49       | 3.17         | 3.53       | 3.46         |
| FCH01    | FCH domain only 1                         | chr19p13.11          | intracellular protein transport                  | ---                                 | -1.19         | -1.32           | 1.32      | 1.21        | -1.05     | -1.08       | -1.20      | -1.17        | 1.40       | 1.28         | 1.27       | 1.53         |
| FCH02    | FCH domain only 2                         | chr5q13.2            | intracellular protein transport                  | ---                                 | -1.37         | -1.22           | 1.06      | -1.36       | -1.00     | -1.32       | -1.10      | -1.11        | -1.46      | -1.29        | -1.26      | 1.73         |
| FCH02    | FCH domain only 2                         | chr5q13.2            | intracellular protein transport                  | ---                                 | 1.07          | -1.04           | 1.12      | -1.01       | -1.27     | -1.11       | -1.34      | -1.06        | -1.81      | -1.55        | -1.57      | -2.09        |
| FCHSD2   | FCH and double SH3 domain                 | chr11q13.4           | 0                                                | ---                                 | 1.13          | -1.03           | 1.09      | 1.06        | -1.01     | 1.27        | -1.10      | -1.02        | -1.19      | -1.14        | -1.43      | -1.25        |
| FCRL2    | Fc receptor-like 2                        | chr1q21              | cell-cell signaling                              | ---                                 | -2.22         | -1.84           | 1.16      | 1.58        | 1.74      | 1.04        | -1.64      | 1.22         | 1.79       | 1.13         | 1.34       | 1.35         |
| FCRLA    | Fc receptor-like A                        | chr1q23.3            | cell differentiation                             | ---                                 | 1.02          | 2.27            | -2.76     | -5.51       | 1.14      | 1.15        | 2.46       | 1.51         | 1.71       | 1.04         | -3.66      | 1.35         |
| FCRLB    | Fc receptor-like B                        | chr1q23.3            | 0                                                | ---                                 | 1.35          | 1.06            | 1.43      | 1.29        | 1.69      | 1.73        | 1.19       | -1.04        | 1.35       | 2.14         | -1.44      | -1.35        |
| FD CSP   | follicular dendritic cell secretory       | chr4q13q41.3         | 0                                                | ---                                 | -1.51         | -1.72           | 1.15      | -1.06       | -1.10     | 1.21        | 1.26       | -1.17        | 1.59       | 1.49         | 1.74       | 1.68         |
| FDFT1    | farnesyl-diphosphate farnesyl transferase | chr8p23.1-p22        | steroid biosynthetic process                     | ---                                 | 1.42          | -1.14           | -1.11     | 1.10        | -1.09     | 1.01        | 1.04       | 1.05         | 1.40       | 1.64         | 1.58       | 2.05         |
| FDFT1    | farnesyl-diphosphate farnesyl transferase | chr8p23.1-p22        | lipid metabolic process                          | Cholesterol_Biosynthesis // GenMAPP | -1.06         | -1.05           | 1.01      | 1.02        | 1.05      | -1.00       | 1.05       | -1.00        | 2.14       | 1.97         | 2.41       | 2.64         |
| FDFT1    | farnesyl-diphosphate farnesyl transferase | chr8p23.1-p22        | lipid metabolic process                          | Cholesterol_Biosynthesis // GenMAPP | -1.03         | 1.03            | -1.09     | -1.03       | 1.02      | -1.04       | 1.11       | 1.00         | 1.66       | 1.35         | 1.52       | 1.44         |
| FDPS     | farnesyl diphosphate synthase             | chr1q22              | lipid metabolic process                          | Cholesterol_Biosynthesis // GenMAPP | -1.21         | -1.12           | 1.02      | 1.00        | 1.02      | -1.05       | 1.23       | 1.08         | 1.55       | 1.18         | 1.32       | 1.47         |
| FD PSP2  | farnesyl diphosphate synthase             | chr7q11.23           | 0                                                | ---                                 | 1.45          | 1.16            | 1.05      | -1.43       | 1.10      | 1.17        | 1.25       | 1.42         | -2.14      | -1.60        | -2.05      | -2.03        |
| FDX1     | ferredoxin 1                              | chr11q22             | lipid metabolic process                          | ---                                 | 1.82          | 1.41            | -1.09     | -1.17       | -1.34     | 1.54        | -1.30      | -1.21        | -1.65      | 1.00         | -1.54      | -2.67        |
| FDX1     | ferredoxin 1                              | chr11q22             | generation of precursor metabolites and energy   | ---                                 | 1.21          | 1.15            | 1.36      | 1.06        | 1.28      | 1.49        | -1.04      | -1.06        | -1.44      | -1.62        | -1.61      | -2.45        |
| FDX1     | ferredoxin 1                              | chr11q22             | generation of precursor metabolites and energy   | ---                                 | 1.11          | 1.13            | -1.00     | -1.02       | -1.04     | -1.24       | 1.00       | 1.06         | 1.46       | -1.00        | 1.19       | -1.04        |
| FECH     | ferrochelatase                            | chr18q21.3           | generation of precursor metabolites and energy   | Heme_Biosynthesis // GenMAPP        | 1.05          | 1.13            | 1.12      | -1.03       | 1.16      | -1.02       | -1.03      | 1.03         | -1.87      | -1.40        | -2.56      | -3.07        |
| FECH     | ferrochelatase                            | chr18q21.3           | generation of precursor metabolites and energy   | Heme_Biosynthesis // GenMAPP        | 1.11          | 1.06            | -1.00     | -1.19       | 1.13      | 1.08        | -1.08      | -1.01        | -1.65      | -1.41        | -1.79      | -2.07        |
| FECH     | ferrochelatase                            | chr18q21.3           | generation of precursor metabolites and energy   | Heme_Biosynthesis // GenMAPP        | 1.27          | -1.31           | -1.14     | 1.01        | -1.04     | 1.28        | -1.07      | -1.13        | -1.72      | -1.68        | -2.30      | -2.21        |
| FEM1B    | fem-1 homolog b (C. elegans)              | chr15q22             | epithelial cell maturation                       | ---                                 | 1.07          | 1.02            | 1.02      | 1.16        | 1.16      | 1.01        | 1.59       | 1.18         | 2.94       | 1.89         | 3.57       | 2.92         |
| FEM1B    | fem-1 homolog b (C. elegans)              | chr15q22             | epithelial cell maturation                       | ---                                 | 1.22          | 1.21            | 1.01      | 1.10        | -1.01     | 1.09        | -1.16      | -1.27        | -1.04      | 1.04         | 1.48       | 1.21         |
| FEM1B    | fem-1 homolog b (C. elegans)              | chr15q22             | epithelial cell maturation                       | ---                                 | 1.00          | -1.03           | 1.13      | -1.00       | 1.07      | 1.03        | -1.25      | -1.06        | -1.48      | -1.30        | -1.23      | -1.13        |
| FEN1     | flap structure-specific endonuclease      | chr11q12             | S phase of mitotic cell cycle                    | ---                                 | -1.14         | -1.10           | -1.05     | 1.01        | 1.04      | -1.01       | 1.10       | 1.05         | 1.28       | 1.10         | -1.06      | 1.02         |
| FENDRR   | FOXF1 adjacent non-coding RNA             | chr16q24.1           | 0                                                | ---                                 | 1.13          | 1.00            | -1.08     | 1.12        | -1.22     | -1.08       | -1.28      | -1.07        | -1.72      | -1.87        | -1.20      | -1.24        |
| FER      | fer (fps/fes related) tyrosine kinase     | chr5q21              | microtubule cytoskeleton organization            | ---                                 | 1.25          | 1.23            | 1.10      | 1.01        | -1.20     | -1.10       | -1.31      | -1.17        | -1.74      | -1.66        | -1.29      | -1.74        |
| FER      | fer (fps/fes related) tyrosine kinase     | chr5q21              | microtubule cytoskeleton organization            | ---                                 | 1.11          | 1.00            | 1.21      | -1.19       | -1.11     | 1.07        | -1.27      | -1.03        | -1.72      | -1.46        | -1.87      | -1.34        |
| FER      | fer (fps/fes related) tyrosine kinase     | chr5q21              | microtubule cytoskeleton organization            | ---                                 | 1.10          | 1.00            | 1.04      | 1.15        | 1.34      | 1.04        | 1.70       | 1.17         | 1.41       | 1.08         | 1.08       | 1.07         |
| FER1L4   | fer-1-like 4 (C. elegans)                 | pschr20q11.22        | 0                                                | ---                                 | 1.08          | -2.00           | -1.23     | 1.15        | 2.20      | 1.11        | 1.17       | -1.60        | 1.50       | 1.41         | 2.28       | 3.40         |
| FERMT1   | fermitin family member 1                  | chr20p12.3           | cell adhesion                                    | ---                                 | -1.06         | -1.09           | 1.05      | -1.00       | 1.06      | 1.07        | -1.10      | -3.45        | -2.80      | -3.32        | -3.63      | -3.63        |
| FERMT1   | fermitin family member 1                  | chr20p12.3           | cell adhesion                                    | ---                                 | -1.06         | -1.04           | -1.09     | -1.11       | 1.18      | 1.11        | -1.15      | -1.22        | -2.96      | -2.51        | -3.23      | -3.73        |
| FERMT1   | fermitin family member 1                  | chr20p12.3           | cell adhesion                                    | ---                                 | 1.04          | 1.31            | 1.03      | -1.16       | -1.03     | -1.03       | -1.06      | 1.04         | -1.97      | -1.88        | -2.71      | -2.71        |
| FERMT1   | fermitin family member 1                  | chr20p12.3           | cell adhesion                                    | ---                                 | 1.05          | -1.23           | -1.49     | 1.04        | -5.37     | -1.23       | -2.31      | 1.35         | 1.04       | 1.35         | 2.36       | 1.49         |
| FERMT2   | fermitin family member 2                  | chr14q22.1           | cell adhesion                                    | ---                                 | -1.15         | -1.06           | 1.04      | 1.05        | 1.26      | 1.03        | 1.10       | -1.01        | 1.83       | 1.44         | 1.70       | 1.36         |
| FEV      | FEV (ETS oncogene family)                 | chr2q36              | transcription, DNA-dependent                     | ---                                 | 1.09          | -3.10           | -1.44     | 1.03        | 2.34      | 9.06        | 1.17       | -1.38        | 1.90       | -1.20        | 2.54       | 2.65         |
| FEZ2     | fasciculation and elongation factor       | chr2p21              | signal transduction                              | ---                                 | -1.03         | -1.16           | 1.01      | 1.01        | -1.25     | -1.16       | 1.20       | 1.02         | 1.47       | 1.44         | 1.13       | 1.37         |
| FEZ2     | fasciculation and elongation factor       | chr2p21              | signal transduction                              | ---                                 | 1.02          | -1.01           | -1.00     | -1.09       | -1.07     | -1.04       | 1.11       | 1.11         | 1.08       | 1.13         | 1.40       | 1.26         |
| FGA      | fibrinogen alpha chain                    | chr4q28              | platelet degranulation                           | ---                                 | -1.32         | 1.40            | 1.32      | -2.89       | 1.09      | -1.45       | 1.53       | -1.67        | -1.85      | -2.36        | 6.42       | 5.40         |
| FGD1     | FYVE, RhoGEF and PH domain                | chrXp11.21           | apoptotic process                                | ---                                 | -1.08         | 1.11            | 1.03      | -1.04       | 1.05      | -1.08       | -1.02      | 1.28         | -1.50      | -1.33        | -1.62      | -1.63        |
| FGD3     | FYVE, RhoGEF and PH domain                | ---                  | apoptotic process                                | ---                                 | -1.24         | -1.08           | 1.56      | 1.05        | -5.59     | 1.14        | 1.00       | -1.35        | 1.32       | 1.06         | 1.04       | 1.70         |
| FGD3     | FYVE, RhoGEF and PH domain                | ---                  | apoptotic process                                | ---                                 | -1.05         | 1.03            | -1.11     | -1.15       | 1.47      | 1.31        | 1.03       | -1.05        | 1.70       | 1.62         | -1.20      | -1.14        |
| FGD4     | FYVE, RhoGEF and PH domain                | chr12p11.21          | apoptotic process                                | ---                                 | 1.07          | -1.03           | 1.04      | 1.20        | -1.10     | 1.05        | -1.10      | -1.05        | -1.55      | -1.25        | -1.04      | 1.05         |
| FGD4     | FYVE, RhoGEF and PH domain                | chr12p11.21          | apoptotic process                                | ---                                 | -1.16         | 1.02            | -1.14     | -1.14       | -1.45     | -1.10       | -1.42      | -1.30        | -2.13      | -1.76        | -1.23      | -1.12        |
| FGD5-AS1 | FGD5 antisense RNA 1                      | ---                  | 0                                                | ---                                 | 1.04          | 1.03            | -1.07     | -1.08       | -1.08     | 1.00        | -1.19      | -1.21        | -1.24      | -1.18        | -1.16      | -1.39        |
| FGD6     | FYVE, RhoGEF and PH domain                | chr12q22             | cytoskeleton organization                        | ---                                 | -1.32         | -1.38           | -1.01     | -1.07       | -1.13     | -1.12       | 1.25       | 1.07         | 2.24       | 2.20         | 3.16       | 2.38         |
| FGD6     | FYVE, RhoGEF and PH domain                | chr12q22             | cytoskeleton organization                        | ---                                 | 1.23          | 1.35            | -1.02     | -1.31       | 1.10      | 1.18        | 1.44       | 1.34         | 1.99       | 1.92         | 2.98       | 1.94         |
| FGD6     | FYVE, RhoGEF and PH domain                | chr12q22             | cytoskeleton organization                        | ---                                 | -1.28         | -2.86           | 1.13      | 1.25        | 1.14      | 1.05        | 1.51       | 1.21         | 3.91       | 2.64         | 3.57       | 2.67         |
| FGF1     | fibroblast growth factor 1                | chr5q31              | angiogenesis                                     | ---                                 | -2.10         | 1.55            | 1.95      | 1.17        | 1.17      | 1.43        | 2.38       | 1.46         | 1.28       | -9.24        | 1.48       | 1.01         |
| FGF1     | fibroblast growth factor 1                | chr5q31              | angiogenesis                                     | ---                                 | 1.35          | 1.02            | 2.85      | 1.80        | -2.31     | -1.72       | 1.91       | -1.64        | 2.33       | 1.99         | -2.08      | -1.11        |

| ID           | Gene Title                                        | Chromosomal Location   | 1st Gene Ontology Biological Process                                 | Pathway                                        | A2497 30 mins | A2497P' 30 mins | A2497 2 h | A2497P' 2 h | A2497 4 h | A2497P' 4 h | A2497 24 h | A2497P' 24 h | A2497 48 h | A2497P' 48 h | A2497 72 h | A2497P' 72 h |
|--------------|---------------------------------------------------|------------------------|----------------------------------------------------------------------|------------------------------------------------|---------------|-----------------|-----------|-------------|-----------|-------------|------------|--------------|------------|--------------|------------|--------------|
| FGF11        | fibroblast growth factor 11                       | chr17p13.1             | signal transduction                                                  | ---                                            | -1.29         | -1.37           | 1.10      | 1.02        | 1.09      | 1.08        | 1.30       | 1.16         | 1.53       | 1.77         | 1.53       | 2.23         |
| FGF12        | fibroblast growth factor 12                       | chr3q28                | signal transduction                                                  | ---                                            | -1.16         | -1.14           | 1.16      | -1.08       | -1.22     | 1.27        | -1.12      | -1.01        | -1.51      | -1.39        | -1.55      | -1.46        |
| FGF12        | fibroblast growth factor 12                       | chr3q28                | signal transduction                                                  | ---                                            | 1.17          | 1.22            | 1.00      | -1.10       | -1.15     | 1.15        | -1.32      | -1.22        | -2.62      | -2.05        | -3.02      | -3.36        |
| FGF14        | fibroblast growth factor 14                       | chr13q34               | signal transduction                                                  | ---                                            | -2.90         | 1.53            | 9.20      | 12.37       | 1.15      | 5.15        | -1.86      | 2.90         | -1.56      | 1.34         | -3.52      | -1.17        |
| FGF14-AS2    | FGF14 antisense RNA 2                             | chr13q33.1             | 0                                                                    | ---                                            | -1.10         | -1.04           | 1.09      | -1.05       | 1.28      | 1.22        | 1.20       | 1.60         | -1.92      | -2.03        | -2.72      | -2.22        |
| FGF2         | fibroblast growth factor 2                        | chr4q26                | activation of MAPKK activity                                         | ---                                            | 1.46          | 1.41            | 1.10      | -1.17       | -1.11     | -1.04       | 1.55       | 1.28         | 1.62       | 1.27         | 2.03       | 1.26         |
| FGF2         | fibroblast growth factor 2                        | chr4q26                | activation of MAPKK activity                                         | ---                                            | 1.20          | 1.28            | -1.07     | -1.25       | -1.16     | 1.02        | -1.00      | 1.04         | -1.51      | -1.50        | -1.75      | -2.47        |
| FGF4         | fibroblast growth factor 4                        | chr11q13.3             | cartilage condensation                                               | ---                                            | -1.67         | -1.31           | -1.07     | -1.06       | 8.37      | 9.55        | -1.66      | 1.83         | -1.26      | 1.23         | -1.51      | 1.10         |
| FGF7 /// KGF | fibroblast growth factor 7 ///                    | chr15q21.2 /// chr9p21 | ovarian follicle development                                         | ---                                            | 1.14          | 1.10            | 1.23      | 1.17        | -1.21     | -1.18       | -1.79      | -1.17        | -2.92      | -1.81        | -3.98      | -6.82        |
| FGFBP1       | fibroblast growth factor binding protein 1        | chr4p15.32             | signal transduction                                                  | ---                                            | -1.15         | -1.05           | -1.15     | -1.18       | 1.15      | -1.00       | -1.27      | -1.12        | -1.40      | -1.30        | 1.30       | 1.34         |
| FGFBP3       | fibroblast growth factor binding protein 3        | chr10q23.32            | positive regulation of vascular permeability                         | ---                                            | 1.11          | 1.09            | -1.06     | -1.07       | -1.05     | 1.02        | 1.25       | 1.21         | 2.04       | 1.99         | 1.17       | 1.04         |
| FGFR1        | fibroblast growth factor receptor 1               | chr8p12                | negative regulation of transcription from RNA polymerase II promoter | ---                                            | -1.24         | -1.35           | -1.03     | -1.39       | 1.59      | 1.66        | 1.10       | -1.02        | 2.21       | 2.12         | -1.03      | -1.83        |
| FGFR1        | fibroblast growth factor receptor 1               | chr8p12                | negative regulation of transcription from RNA polymerase II promoter | ---                                            | 1.29          | -1.09           | -1.43     | -1.78       | 1.22      | -1.80       | 1.53       | -1.19        | 1.88       | 1.02         | 1.66       | 1.26         |
| FGFR1        | fibroblast growth factor receptor 1               | chr8p12                | negative regulation of transcription from RNA polymerase II promoter | ---                                            | -1.11         | -1.44           | -1.29     | -1.16       | -1.19     | -1.24       | -1.03      | -1.06        | 1.68       | 1.58         | 1.23       | 1.39         |
| FGFR1        | fibroblast growth factor receptor 1               | chr8p12                | negative regulation of transcription from RNA polymerase II promoter | ---                                            | 1.12          | -1.06           | 1.10      | -1.14       | 1.09      | 1.05        | 1.02       | -1.08        | 2.02       | 2.00         | -1.17      | -1.35        |
| FGFR1OP      | FGFR1 oncogene partner                            | chr6q27                | G2                                                                   | ---                                            | 1.10          | 1.08            | -1.04     | -1.05       | -1.20     | -1.06       | 1.15       | 1.12         | -1.16      | -1.09        | -1.21      | -1.50        |
| FGFR1OP      | FGFR1 oncogene partner                            | chr6q27                | G2                                                                   | ---                                            | 1.14          | 1.06            | 1.02      | 1.10        | 1.03      | 1.16        | -1.43      | -1.00        | -1.44      | -1.17        | -1.08      | -1.26        |
| FGFR1OP2     | FGFR1 oncogene partner 2                          | chr12p11.23            | response to wounding                                                 | ---                                            | 1.46          | 1.18            | -1.02     | -1.03       | 1.08      | 1.21        | -1.15      | 1.00         | 1.54       | 1.47         | 1.13       | 1.11         |
| FGFR2        | fibroblast growth factor receptor 2               | chr10q26               | negative regulation of transcription from RNA polymerase II promoter | ---                                            | -1.09         | -1.02           | -1.09     | -1.08       | 1.01      | 1.02        | -1.10      | -1.11        | 1.12       | 1.18         | 1.14       | 1.23         |
| FGFR2        | fibroblast growth factor receptor 2               | chr10q26               | negative regulation of transcription from RNA polymerase II promoter | ---                                            | -1.01         | 1.01            | 3.49      | 2.70        | 1.03      | -2.75       | -1.26      | -2.74        | -2.91      | -1.51        | -7.28      | -2.03        |
| FGFR4        | fibroblast growth factor receptor 4               | chr5q35.1-qter         | organ induction                                                      | ---                                            | 1.67          | 1.10            | 3.01      | 3.06        | 1.26      | -1.51       | 2.82       | 2.49         | 4.23       | 3.53         | 9.60       | 11.43        |
| FGFR4        | fibroblast growth factor receptor 4               | chr5q35.1-qter         | organ induction                                                      | ---                                            | -1.02         | 1.12            | -1.29     | 1.17        | -1.15     | 1.09        | -1.10      | -1.21        | 1.72       | 1.33         | 1.66       | 1.97         |
| FGFRL1       | fibroblast growth factor receptor like 1          | chr4p16                | skeletal system development                                          | ---                                            | 1.00          | -1.11           | 1.09      | 1.12        | 1.28      | 1.11        | 1.10       | -1.11        | 1.75       | 1.87         | 1.53       | 1.44         |
| FGGY         | FGGY carbohydrate kinase                          | chr1p32.1              | carbohydrate metabolic process                                       | ---                                            | -5.15         | -1.47           | 4.46      | 3.60        | -1.29     | -3.73       | -2.13      | 1.30         | 1.24       | 2.32         | 1.07       | -3.58        |
| FGGY         | FGGY carbohydrate kinase                          | chr1p32.1              | carbohydrate metabolic process                                       | ---                                            | -1.19         | -1.10           | 1.06      | 1.18        | -1.17     | -1.32       | 1.23       | 1.04         | 1.18       | 1.22         | -1.31      | 1.10         |
| FGR          | Gardner-Rasheed feline sarcoma virus              | chr1p36.2-p36.1        | immune response-regulating cell surface receptor                     | ---                                            | 1.46          | -1.88           | 1.30      | -3.07       | -1.36     | 1.64        | -1.45      | -1.44        | 1.75       | 2.15         | 6.88       | 6.07         |
| FH           | fumarate hydratase                                | chr1q42.1              | tricarboxylic acid cycle                                             | Krebs-TCA_Cycle // GenMAPP                     | -1.07         | -1.05           | -1.03     | 1.04        | -1.06     | -1.07       | -1.00      | -1.02        | 1.08       | 1.07         | -1.22      | -1.12        |
| FH           | fumarate hydratase                                | chr1q42.1              | tricarboxylic acid cycle                                             | Krebs-TCA_Cycle // GenMAPP                     | -1.03         | -1.21           | -1.08     | -1.04       | 1.17      | 1.15        | -1.27      | -1.31        | -1.38      | 1.09         | -1.38      | -1.29        |
| FH           | fumarate hydratase                                | chr1q42.1              | tricarboxylic acid cycle                                             | Krebs-TCA_Cycle // GenMAPP                     | -1.05         | -1.08           | -1.03     | 1.06        | -1.08     | -1.01       | -1.09      | -1.04        | 1.06       | 1.08         | -1.23      | -1.10        |
| FHDC1        | FH2 domain containing 1                           | chr4q31.3              | cellular component organization                                      | ---                                            | 1.12          | 1.06            | 1.05      | -1.20       | 1.01      | 1.00        | -1.21      | -1.24        | 1.28       | 1.11         | 1.41       | 1.12         |
| FHL1         | four and a half LIM domain 1                      | chrXq26                | regulation of membrane depolarization                                | ---                                            | -1.02         | -1.02           | -1.00     | -1.00       | 1.03      | 1.10        | -1.03      | -1.03        | -1.23      | -1.04        | -1.27      | -1.28        |
| FHL1         | four and a half LIM domain 1                      | chrXq26                | regulation of membrane depolarization                                | ---                                            | -1.07         | -1.02           | 1.12      | -1.08       | 1.07      | 1.11        | 1.10       | -1.11        | -1.52      | -1.12        | -1.29      | -1.18        |
| FHL3         | four and a half LIM domain 3                      | chr1p34                | muscle organ development                                             | ---                                            | -1.00         | 1.10            | 1.16      | 1.21        | 1.21      | 1.57        | 2.12       | 2.12         | 2.13       | 1.51         | 2.02       | 1.85         |
| FHL5         | four and a half LIM domain 5                      | chr6q16.1-q16.3        | positive regulation of transcription from RNA polymerase II promoter | ---                                            | 1.13          | -1.21           | -1.09     | 1.37        | -1.18     | -1.26       | -1.35      | 1.40         | 1.46       | 1.20         | 1.55       | -1.44        |
| FIBCD1       | fibrinogen C domain containing 1                  | chr9q34.12             | 0                                                                    | ---                                            | 1.16          | -1.08           | -1.15     | 1.27        | 1.89      | 1.37        | 1.22       | 1.21         | 2.48       | 2.45         | 2.07       | 3.93         |
| FIBCD1       | fibrinogen C domain containing 1                  | chr9q34.12             | signal transduction                                                  | ---                                            | -2.75         | -2.16           | 2.03      | 2.66        | -8.36     | -4.77       | 4.37       | 1.53         | 2.69       | 1.92         | 2.21       | 1.93         |
| FIBIN        | fin bud initiation factor homolog 1               | chr1p14.2              | 0                                                                    | ---                                            | -1.02         | -1.07           | -1.32     | -1.05       | -1.01     | -1.16       | -1.51      | -1.14        | -4.06      | -4.75        | -5.14      | -3.59        |
| FIBP         | fibroblast growth factor (acidic) binding protein | chr11q13.1             | fibroblast growth factor receptor signaling                          | ---                                            | -1.02         | -1.02           | -1.05     | 1.07        | -1.01     | -1.08       | 1.15       | 1.11         | 1.18       | 1.01         | -1.39      | -1.16        |
| FIGN         | figetin                                           | chr2q24.3              | 0                                                                    | ---                                            | -1.18         | -1.32           | -1.00     | -1.11       | 1.04      | 1.26        | 1.22       | -1.16        | -1.86      | -2.67        | -3.55      | -4.03        |
| FIGN         | figetin                                           | chr2q24.3              | 0                                                                    | ---                                            | 1.18          | 1.04            | -1.16     | -1.32       | 1.13      | 1.19        | -1.16      | -1.13        | -2.88      | -2.31        | -3.92      | -4.46        |
| FIGN         | figetin                                           | chr2q24.3              | 0                                                                    | ---                                            | 1.05          | 1.13            | -1.04     | -1.13       | -1.18     | -1.03       | -1.07      | 1.16         | -2.75      | -2.27        | -1.70      | -2.19        |
| FIGN         | figetin                                           | chr2q24.3              | 0                                                                    | ---                                            | -1.07         | -1.27           | 1.08      | -1.07       | 1.14      | 1.14        | -1.37      | -1.26        | -2.77      | -2.59        | -2.99      | -3.22        |
| FIGNL1       | figetin-like 1                                    | chr7p12.1              | osteoblast differentiation                                           | ---                                            | 1.07          | 1.14            | 1.04      | 1.07        | -1.06     | 1.06        | -1.23      | -1.19        | -1.52      | -1.22        | -1.45      | -1.45        |
| FIP1L1       | FIP1 like 1 (S. cerevisiae)                       | chr4q12                | mRNA processing                                                      | ---                                            | -1.01         | 1.03            | 1.04      | 1.13        | 1.04      | -1.02       | 1.04       | 1.04         | 1.43       | 1.29         | 1.48       | 1.43         |
| FIP1L1       | FIP1 like 1 (S. cerevisiae)                       | chr4q12                | luteinization                                                        | ---                                            | 1.02          | -1.06           | 1.08      | -1.00       | -1.05     | -1.14       | -1.04      | -1.16        | 1.14       | 1.37         | 1.77       | 1.51         |
| FTTM2        | fat storage-inducing transmembrane protein 2      | chr20q13.12            | cytoskeleton organization                                            | ---                                            | 1.49          | 1.10            | 1.25      | 1.03        | 1.28      | 1.12        | -1.04      | 1.18         | -1.40      | -1.22        | -1.12      | -1.01        |
| FJX1         | four jointed box 1 (Drosophila)                   | chr11p13               | 0                                                                    | ---                                            | 1.08          | 1.14            | -1.05     | -1.20       | -1.02     | -1.03       | -1.30      | -1.10        | -1.65      | -1.64        | -1.62      | -1.81        |
| FKBP10       | FK506 binding protein 10                          | chr17q21.2             | protein peptidyl-prolyl isomerization                                | ---                                            | -1.06         | -1.07           | 1.02      | 1.05        | -1.01     | -1.01       | 1.11       | 1.05         | 1.20       | 1.09         | 1.26       | 1.42         |
| FKBP14       | FK506 binding protein 14                          | chr7p14.3              | protein peptidyl-prolyl isomerization                                | ---                                            | 1.03          | 1.12            | 1.09      | -1.04       | -1.01     | -1.13       | -1.07      | -1.06        | 1.32       | 1.61         | 1.33       | 1.57         |
| FKBP14       | FK506 binding protein 14                          | chr7p14.3              | protein peptidyl-prolyl isomerization                                | ---                                            | 1.02          | 1.07            | -1.04     | -1.05       | -1.16     | -1.03       | -1.01      | 1.01         | 1.37       | 1.41         | 1.51       | 1.57         |
| FKBP15       | FK506 binding protein 15                          | chr9q32                | protein peptidyl-prolyl isomerization                                | ---                                            | -1.01         | -1.06           | -1.03     | -1.01       | -1.11     | -1.22       | 1.21       | 1.05         | -1.25      | -1.29        | -1.14      | -1.01        |
| FKBP15       | FK506 binding protein 15                          | chr9q32                | protein peptidyl-prolyl isomerization                                | ---                                            | 1.06          | -1.04           | -1.04     | 1.10        | 1.06      | -1.08       | 1.20       | 1.14         | -1.27      | -1.22        | -1.28      | -1.13        |
| FKBP15       | FK506 binding protein 15                          | chr9q32                | protein peptidyl-prolyl isomerization                                | ---                                            | 1.79          | -1.27           | -1.38     | 1.02        | -1.16     | -1.18       | 1.31       | -1.15        | 3.06       | 3.67         | 1.09       | 1.08         |
| FKBP15       | FK506 binding protein 15                          | chr9q32                | protein peptidyl-prolyl isomerization                                | ---                                            | 1.01          | -1.06           | -1.19     | -1.62       | 1.04      | 1.14        | 1.28       | 1.02         | 2.02       | 2.37         | 1.29       | 1.49         |
| FKBP1A       | FK506 binding protein 1A                          | chr20p13               | protein peptidyl-prolyl isomerization                                | Calcium_regulation_in_cardiac_cells // GenMAPP | -1.02         | 1.01            | -1.00     | 1.00        | -1.07     | 1.02        | 1.03       | -1.07        | -1.01      | 1.04         | -1.17      | -1.29        |
| FKBP1A       | FK506 binding protein 1A                          | chr20p13               | protein peptidyl-prolyl isomerization                                | Calcium_regulation_in_cardiac_cells // GenMAPP | 1.31          | 1.19            | 1.06      | 1.33        | 1.24      | 1.08        | 1.13       | 1.49         | 1.88       | -1.10        | -1.01      | 1.09         |
| FKBP2        | FK506 binding protein 2                           | chr11q13.1-q13.3       | protein peptidyl-prolyl isomerization                                | ---                                            | -1.16         | -1.15           | -1.02     | -1.08       | -1.00     | -1.08       | 1.12       | 1.10         | 1.16       | 1.13         | 1.10       | 1.21         |
| FKBP3        | FK506 binding protein 3                           | chr14q21.2             | protein peptidyl-prolyl isomerization                                | ---                                            | -1.12         | -1.18           | 1.02      | 1.06        | 1.05      | -1.10       | 1.25       | 1.20         | -1.13      | -1.10        | -1.28      | -1.37        |
| FKBP4        | FK506 binding protein 4                           | chr12p13.33            | protein peptidyl-prolyl isomerization                                | ---                                            | -1.07         | -1.03           | 1.04      | -1.00       | 1.08      | -1.09       | 1.06       | -1.01        | 1.49       | 1.26         | 1.19       | 1.24         |
| FKBP5        | FK506 binding protein 5                           | chr6p21.31             | protein peptidyl-prolyl isomerization                                | ---                                            | 1.12          | 1.08            | 1.02      | -1.07       | 1.01      | -1.02       | -1.07      | -1.02        | -1.14      | -1.05        | -1.29      | -1.38        |
| FKBP7        | FK506 binding protein 7                           | chr2q31.2              | protein peptidyl-prolyl isomerization                                | ---                                            | 1.04          | 1.07            | 1.07      | -1.40       | -1.20     | -1.10       | -1.69      | -1.04        | -2.38      | -2.02        | -2.85      | -3.34        |
| FKBP8        | FK506 binding protein 8                           | chr19p12               | protein peptidyl-prolyl isomerization                                | ---                                            | -1.08         | -1.08           | -1.05     | -1.06       | 1.00      | -1.12       | 1.15       | 1.09         | 1.34       | 1.33         | 1.02       | 1.16         |
| FKBP9        | FK506 binding protein 9                           | chr7p11.1              | protein peptidyl-prolyl isomerization                                | ---                                            | -1.07         | 1.01            | -1.03     | -1.02       | 1.00      | -1.02       | 1.07       | 1.06         | 1.02       | 1.05         | -1.12      | -1.11        |
| FKRP         | fukutin related protein                           | chr19q13.32            | glycoprotein biosynthetic process                                    | ---                                            | 1.08          | -1.23           | -1.03     | 1.11        | -1.07     | 1.05        | -1.60      | -1.06        | -2.52      | -1.82        | 1.01       | -1.17        |
| FKRP         | fukutin related protein                           | chr19q13.32            | glycoprotein biosynthetic process                                    | ---                                            | 1.14          | 1.02            | -1.02     | -1.02       | 1.06      | -1.01       | -1.15      | -1.07        | -1.68      | -1.69        | -1.68      | -1.70        |
| FKSG49       | FKSG49                                            | chr5q13.3              | 0                                                                    | ---                                            | -1.04         | -1.19           | -1.12     | -1.04       | 1.04      | 1.04        | -1.14      | 1.08         | -1.42      | -1.32        | -1.59      | -1.29        |

| ID             | Gene Title                                       | Chromosomal Location      | 1st Gene Ontology Biological Process      | Pathway                                   | A2497 30 mins | A2497P' 30 mins | A2497 2 h | A2497P' 2 h | A2497 4 h | A2497P' 4 h | A2497 24 h | A2497P' 24 h | A2497 48 h | A2497P' 48 h | A2497 72 h | A2497P' 72 h |
|----------------|--------------------------------------------------|---------------------------|-------------------------------------------|-------------------------------------------|---------------|-----------------|-----------|-------------|-----------|-------------|------------|--------------|------------|--------------|------------|--------------|
| FKSG49         | FKSG49                                           | chr5q13.3                 | 0                                         | ---                                       | 1.04          | 1.03            | 1.11      | 1.06        | 1.12      | -1.02       | 1.02       | 1.02         | -1.24      | -1.23        | -1.18      | -1.14        |
| FKSG49 /// L   | FKSG49 /// uncharacterized                       | chr5q13.3 /// chr7q40     | 0                                         | ---                                       | -1.06         | -1.04           | 1.07      | 1.14        | 1.11      | 1.13        | -1.06      | -1.07        | -1.29      | -1.27        | -1.16      | -1.24        |
| FKTN           | fukutin                                          | chr9q31-q33               | nervous system development                | ---                                       | 1.03          | 1.07            | -1.21     | -1.11       | -1.11     | -1.12       | -1.25      | -1.11        | -1.15      | -1.11        | -1.65      | -1.39        |
| FLAD1          | flavin adenine dinucleotide                      | chr1q21.3                 | FAD biosynthetic process                  | ---                                       | 1.01          | -1.18           | 1.04      | 1.14        | -1.13     | -1.15       | 1.08       | 1.15         | 1.30       | 1.12         | 1.21       | 1.52         |
| FLCN           | folliculin                                       | chr17p11.2                | negative regulation of transcription from | ---                                       | 1.03          | 1.04            | 1.06      | -2.28       | -1.02     | -1.70       | 1.42       | -1.50        | 10.82      | 5.95         | 3.89       | 2.22         |
| FLII           | flightless I homolog (Drosophila)                | chr17p11.2                | transcription, DNA-dependent              | ---                                       | -1.03         | -1.16           | 1.05      | 1.22        | 1.07      | 1.04        | 1.11       | 1.06         | 1.25       | 1.17         | 1.08       | 1.41         |
| FLII           | flightless I homolog (Drosophila)                | chr17p11.2                | transcription, DNA-dependent              | ---                                       | -1.20         | -1.16           | -1.25     | -1.20       | 1.12      | 1.10        | 1.10       | 1.07         | 1.43       | 1.54         | -1.28      | 1.23         |
| FLII           | flightless I homolog (Drosophila)                | chr17p11.2                | transcription, DNA-dependent              | ---                                       | -1.46         | -1.30           | -1.03     | -1.01       | -1.02     | 1.11        | -1.14      | -1.05        | 1.23       | 1.12         | -1.07      | 1.18         |
| FLJ10038       | uncharacterized protein FLJ10038                 | chr15q21.2                | 0                                         | ---                                       | 1.29          | 1.20            | 1.02      | 1.14        | -1.14     | 1.11        | -1.09      | -1.21        | -1.71      | -2.10        | -3.24      | -2.62        |
| FLJ10038       | uncharacterized protein FLJ10038                 | chr15q21.2                | 0                                         | ---                                       | -1.07         | -1.12           | 1.10      | 1.08        | -1.27     | -1.02       | 1.21       | 1.46         | -1.57      | -1.40        | -1.82      | -2.12        |
| FLJ10038       | uncharacterized protein FLJ10038                 | chr15q21.2                | 0                                         | ---                                       | -1.15         | -1.08           | 1.34      | 1.12        | 1.58      | 1.52        | -1.32      | -1.06        | -2.22      | -2.04        | -2.57      | -2.97        |
| FLJ11235       | uncharacterized FLJ11235                         | chr5q22.2                 | 0                                         | ---                                       | -1.05         | -1.06           | 1.04      | 1.15        | -1.08     | -1.05       | -1.01      | 1.01         | 1.13       | -1.36        | -2.54      | -1.66        |
| FLJ13773       | uncharacterized LOC24631                         | ---                       | 0                                         | ---                                       | 1.51          | 1.59            | 1.12      | -1.05       | -2.19     | -1.26       | 1.69       | 1.41         | -1.52      | -1.43        | -2.11      | -1.35        |
| FLJ14082       | ---                                              | ---                       | 0                                         | ---                                       | -1.18         | 1.33            | 1.15      | -1.22       | -1.14     | -1.08       | -1.23      | 1.11         | -2.40      | -1.90        | -3.47      | -2.01        |
| FLJ14186 /// L | uncharacterized LOC40114                         | chr1q42.11 /// chr4q40    | 0                                         | ---                                       | 1.00          | -1.11           | -1.08     | 1.20        | -1.27     | -1.07       | -1.26      | 1.11         | -1.30      | -1.26        | -1.35      | -1.05        |
| FLJ16124       | FLJ16124 protein                                 | chr2p14                   | 0                                         | ---                                       | 1.09          | 1.83            | -1.91     | 1.11        | -1.03     | 1.33        | 1.86       | 2.19         | -2.23      | -1.47        | -1.99      | -1.92        |
| FLJ20444       | uncharacterized protein FLJ20444                 | chr9q21                   | 0                                         | ---                                       | 1.30          | -1.19           | 1.20      | 1.21        | 1.14      | -1.09       | -1.11      | -1.07        | -1.50      | -1.77        | -1.81      | -2.02        |
| FLJ30064       | uncharacterized LOC64497                         | chr7q21.3                 | 0                                         | ---                                       | -1.35         | -1.66           | -1.62     | 1.45        | 1.24      | -1.12       | -2.73      | 1.19         | 2.26       | 2.15         | -2.12      | -1.25        |
| FLJ31306       | uncharacterized LOC37902                         | chr14q23.1                | 0                                         | ---                                       | 1.75          | 1.33            | 1.43      | 1.01        | 1.07      | 1.46        | -1.52      | -1.59        | -1.57      | -1.90        | -1.96      | -2.86        |
| FLJ31306       | uncharacterized LOC37902                         | chr14q23.1                | 0                                         | ---                                       | 1.09          | 1.15            | 1.29      | 1.17        | -1.19     | -1.08       | -1.30      | -1.14        | -2.22      | -2.17        | -2.66      | -2.30        |
| FLJ31715       | uncharacterized FLJ31715                         | chr3p22.1                 | 0                                         | ---                                       | -1.04         | -1.23           | -1.10     | 1.08        | 1.03      | -1.04       | 1.15       | 1.24         | -1.54      | -1.29        | -1.17      | -1.07        |
| FLJ31945       | uncharacterized LOC44013                         | chr13q14.2                | 0                                         | ---                                       | 1.30          | 1.04            | 1.18      | 1.13        | -1.01     | 1.20        | 2.60       | -1.15        | -2.35      | -2.39        | -3.43      | -1.46        |
| FLJ31958       | uncharacterized LOC14315                         | chr10q11.23               | 0                                         | ---                                       | -1.15         | -1.32           | 1.56      | 1.62        | -1.15     | -1.32       | 1.19       | -1.04        | 1.00       | -1.77        | -1.05      | 1.11         |
| FLJ32255       | uncharacterized LOC64397                         | chr5p12                   | 0                                         | ---                                       | -1.05         | -1.19           | -1.17     | -1.02       | -1.13     | -1.03       | 1.24       | 1.39         | 1.85       | 1.31         | 1.48       | 1.44         |
| FLJ32255       | uncharacterized LOC64397                         | chr5p12                   | 0                                         | ---                                       | 1.18          | 1.11            | -1.02     | 1.08        | -1.19     | -1.10       | 1.40       | 1.29         | 1.67       | 1.35         | 1.32       | 1.25         |
| FLJ32955       | uncharacterized protein FLJ32955                 | chr2q23.3                 | 0                                         | ---                                       | 1.32          | 4.38            | -1.62     | -6.07       | 4.27      | 5.72        | 1.13       | 1.01         | 1.30       | 2.61         | 2.24       | 1.92         |
| FLJ33630       | uncharacterized LOC64487                         | chr5q23.3                 | 0                                         | ---                                       | -1.09         | -1.10           | 1.37      | 1.09        | 1.07      | -1.09       | -1.50      | -1.44        | -2.91      | -3.06        | -3.30      | -1.69        |
| FLJ33630       | uncharacterized LOC64487                         | chr5q23.3                 | 0                                         | ---                                       | 1.36          | 1.33            | -1.10     | -1.16       | 1.01      | -1.16       | 1.02       | 1.16         | -2.09      | -1.40        | -5.26      | -5.76        |
| FLJ33630       | uncharacterized LOC64487                         | chr5q23.3                 | 0                                         | ---                                       | 1.13          | 1.20            | -1.02     | -1.56       | 1.08      | 1.40        | -1.39      | -1.23        | -3.50      | -3.06        | -2.69      | -3.42        |
| FLJ35816       | FLJ35816 protein                                 | chr4p16.3                 | 0                                         | ---                                       | -1.15         | -1.16           | 1.71      | 1.84        | -1.08     | 1.18        | 1.25       | -1.07        | -2.12      | -1.32        | -3.67      | -2.41        |
| FLJ36840       | uncharacterized LOC64552                         | ---                       | 0                                         | ---                                       | -1.58         | -1.08           | -1.11     | 1.22        | -1.58     | -1.19       | -1.12      | 1.21         | -1.35      | -1.38        | -1.66      | -1.04        |
| FLJ36848       | uncharacterized LOC64711                         | chr2p15                   | 0                                         | Circadian_Rhythm // GenMAPP // Glycocalyx | -1.02         | -1.05           | -1.08     | -1.26       | 1.32      | 1.10        | 1.37       | 1.00         | 1.58       | 1.82         | 1.86       | 1.89         |
| FLJ37035       | uncharacterized LOC39982                         | chr10q26.13               | 0                                         | ---                                       | 1.08          | 1.27            | 1.10      | -1.10       | 2.16      | 1.98        | -1.16      | -1.25        | -4.08      | -2.71        | -2.24      | -1.22        |
| FLJ38668       | uncharacterized LOC64490                         | chr2q12.3                 | 0                                         | ---                                       | -1.13         | -1.03           | -1.22     | -1.41       | -1.24     | -1.21       | 1.16       | 1.31         | -1.94      | 1.06         | 1.14       | 1.14         |
| FLJ38717       | FLJ38717 protein                                 | chr6p21.3                 | 0                                         | ---                                       | 1.37          | 1.04            | -1.30     | 1.20        | 1.19      | 1.21        | -1.42      | -1.64        | -1.47      | -1.56        | -1.33      | -1.09        |
| FLJ39632       | uncharacterized LOC64247                         | chr14q11.2                | 0                                         | ---                                       | 1.33          | 1.25            | 1.12      | 1.10        | -1.27     | -1.61       | -1.19      | 1.32         | -1.84      | -2.51        | -1.10      | -1.08        |
| FLJ39632 /// L | uncharacterized LOC64247                         | chr14q11.1 /// chr14q11.2 | 0                                         | ---                                       | -1.18         | -1.09           | -1.03     | 1.02        | 1.33      | 1.17        | 1.17       | -1.03        | -1.96      | -1.68        | -2.27      | -1.68        |
| FLJ39632 /// L | uncharacterized LOC64247                         | chr14q11.1 /// chr14q11.2 | 0                                         | ---                                       | 1.04          | 1.07            | -1.00     | 1.02        | 1.01      | -1.00       | -1.17      | -1.15        | -2.83      | -2.61        | -1.75      | -1.90        |
| FLJ39739       | uncharacterized FLJ39739                         | chr1q21.1                 | 0                                         | ---                                       | 1.01          | -1.05           | 1.08      | 1.20        | 1.19      | 1.07        | 1.12       | 1.07         | -1.05      | 1.13         | -1.45      | -1.07        |
| FLJ39739 /// L | uncharacterized FLJ39739                         | chr1q21.1                 | 0                                         | ---                                       | -1.03         | -1.10           | 1.06      | 1.07        | 1.08      | -1.04       | 1.44       | 1.25         | 1.33       | 1.23         | 1.17       | 1.38         |
| FLJ42627       | uncharacterized LOC64564                         | chr16p13.3                | 0                                         | ---                                       | -1.65         | -1.16           | 1.12      | -1.01       | -1.34     | 1.30        | 1.08       | -1.11        | -1.06      | 1.17         | -1.95      | -1.33        |
| FLJ43663       | uncharacterized LOC37880                         | chr7q32.3                 | 0                                         | ---                                       | -1.14         | 1.11            | 1.11      | 1.29        | 1.17      | 1.15        | 1.17       | 1.23         | 1.33       | 1.15         | 1.83       | 1.53         |
| FLJ44342       | uncharacterized LOC64546                         | chr17q22                  | 0                                         | ---                                       | 1.08          | -1.10           | 1.05      | 1.21        | 1.19      | 1.01        | -1.16      | 1.03         | -1.29      | -1.53        | 1.24       | 1.53         |
| FLJ44342       | uncharacterized LOC64546                         | chr17q22                  | 0                                         | ---                                       | 1.17          | 1.34            | 1.09      | 1.04        | 1.19      | 1.34        | -1.32      | -1.18        | -2.36      | -3.65        | -2.59      | -2.30        |
| FLJ44342       | uncharacterized LOC64546                         | chr17q22                  | 0                                         | ---                                       | 1.30          | 1.00            | 1.08      | 1.12        | 1.39      | 1.37        | -1.61      | -1.53        | -1.71      | -1.75        | -2.09      | -1.72        |
| FLJ44896       | FLJ44896 protein                                 | chr5p15.33                | 0                                         | ---                                       | -1.27         | -1.30           | 1.01      | -1.25       | 1.01      | 1.09        | -1.40      | -1.13        | -2.36      | -1.84        | -1.72      | -1.09        |
| FLJ45340       | uncharacterized LOC40248                         | chr7q32.1                 | 0                                         | ---                                       | -1.09         | -1.17           | 1.01      | -1.12       | 1.25      | 1.23        | -1.17      | 1.02         | -2.84      | -2.93        | -2.68      | -2.44        |
| FLJ45482       | uncharacterized LOC64556                         | ---                       | 0                                         | ---                                       | -1.17         | -1.32           | -1.07     | -1.17       | -1.00     | 1.01        | -1.12      | -1.08        | -1.58      | -1.26        | -1.25      | -1.10        |
| FLJ46026       | FLJ46026 protein                                 | chr17q25.3                | 0                                         | ---                                       | -1.33         | 1.04            | 1.00      | -1.17       | 1.29      | -1.03       | -2.08      | 1.20         | 1.68       | -1.11        | -1.72      | -1.49        |
| FLJ46875       | uncharacterized LOC44091                         | chr2q24.1                 | 0                                         | ---                                       | 1.01          | -1.21           | 1.17      | 1.30        | 1.05      | 1.13        | 1.72       | 1.09         | 1.54       | 1.36         | 1.22       | 1.28         |
| FLNA           | filamin A, alpha                                 | chrXq28                   | epithelial to mesenchymal transition      | ---                                       | 1.01          | -1.06           | 1.05      | 1.09        | 1.08      | 1.07        | 1.17       | 1.05         | 1.27       | 1.17         | -1.17      | -1.03        |
| FLNB           | filamin B, beta                                  | chr3p14.3                 | cytoskeletal anchoring at plasma membrane | ---                                       | -1.03         | -1.01           | -1.01     | 1.05        | 1.38      | -1.02       | 1.06       | 1.06         | 1.65       | 1.38         | 1.64       | 1.73         |
| FLNB           | filamin B, beta                                  | chr3p14.3                 | cytoskeletal anchoring at plasma membrane | ---                                       | -1.20         | -1.23           | -1.06     | 1.08        | 1.02      | -1.02       | 1.33       | 1.34         | 2.45       | 2.07         | 2.91       | 3.15         |
| FLNC           | filamin C, gamma                                 | chr7q32-q35               | cell junction assembly                    | ---                                       | 1.08          | 1.08            | 1.19      | -1.44       | -1.51     | -1.31       | -1.03      | 1.10         | 1.43       | 1.28         | 1.71       | 2.01         |
| FLOT1          | flotillin 1                                      | chr6p21.3                 | axonogenesis                              | ---                                       | -1.01         | -1.12           | 1.07      | 1.00        | 1.12      | 1.17        | 1.21       | 1.05         | 1.38       | 1.47         | 1.32       | 1.64         |
| FLOT1          | flotillin 1                                      | chr6p21.3                 | axonogenesis                              | ---                                       | 1.11          | 1.24            | -1.01     | 1.28        | 1.44      | 1.38        | 1.02       | 1.03         | 1.41       | 1.24         | 1.17       | -1.13        |
| FLOT1          | flotillin 1                                      | chr6p21.3                 | axonogenesis                              | ---                                       | -1.06         | -1.06           | 1.06      | 1.14        | 1.14      | -1.04       | 1.33       | 1.20         | 1.62       | 1.33         | 1.41       | 1.50         |
| FLOT1          | flotillin 1                                      | chr6p21.3                 | axonogenesis                              | ---                                       | 1.04          | 1.02            | 1.15      | 1.21        | 1.14      | -1.05       | 1.37       | 1.27         | 1.56       | 1.29         | 1.46       | 1.50         |
| FLRT2 /// L    | fibronectin leucine rich transmembrane protein 2 | chr14q24-q32              | cell adhesion                             | ---                                       | -1.05         | -1.04           | 1.02      | 1.00        | 1.04      | 1.13        | -1.35      | -1.11        | -3.77      | -2.23        | -3.21      | -3.61        |
| FLRT3          | fibronectin leucine rich transmembrane protein 3 | chr20p11                  | cell adhesion                             | ---                                       | 1.01          | 1.15            | -1.17     | -1.29       | 1.31      | 1.13        | -1.33      | -1.43        | -1.40      | -2.03        | -1.29      | -1.10        |
| FLT1           | fms-related tyrosine kinase                      | chr13q12                  | angiogenesis                              | ---                                       | -2.88         | -1.09           | -2.28     | 2.13        | -1.15     | 2.57        | -1.59      | -1.77        | 4.36       | 6.38         | -1.43      | -1.70        |
| FLVCR1         | feline leukemia virus subgroup gamma receptor 1  | chr1q32.3                 | in utero embryonic development            | ---                                       | -1.06         | -1.12           | -1.04     | -1.02       | 1.04      | 1.07        | -1.14      | -1.03        | -1.40      | -1.15        | -1.20      | -1.04        |
| FLVCR1         | feline leukemia virus subgroup gamma receptor 1  | chr1q32.3                 | in utero embryonic development            | ---                                       | 1.12          | 1.10            | 1.11      | -1.05       | -1.05     | -1.01       | -1.15      | -1.06        | -1.58      | -1.31        | -1.25      | -1.27        |
| FMN2           | formin 2                                         | chr1q43                   | transport                                 | ---                                       | 1.16          | 1.13            | -1.01     | -1.06       | -1.34     | -1.21       | -1.12      | 1.05         | -2.20      | -1.63        | -1.53      | -2.38        |
| FMNL1          | formin-like 1                                    | chr17q21                  | substrate-dependent cell migration        | ---                                       | 1.02          | 1.03            | 1.09      | 1.01        | -1.03     | -1.07       | 1.23       | 1.18         | 1.50       | 1.17         | -1.05      | 1.09         |
| FMNL2          | formin-like 2                                    | chr2q23.3                 | cytoskeleton organization                 | ---                                       | -1.09         | 1.04            | 1.31      | -1.15       | -1.62     | -2.11       | 4.06       | 2.31         | 1.93       | 1.39         | 2.89       | 2.44         |

| ID             | Gene Title                                       | Chromosomal Location   | 1st Gene Ontology Biological Process                                            | Pathway                              | A2497 30 mins | A2497P' 30 mins | A2497 2 h | A2497P' 2 h | A2497 4 h | A2497P' 4 h | A2497 24 h | A2497P' 24 h | A2497 48 h | A2497P' 48 h | A2497 72 h | A2497P' 72 h |
|----------------|--------------------------------------------------|------------------------|---------------------------------------------------------------------------------|--------------------------------------|---------------|-----------------|-----------|-------------|-----------|-------------|------------|--------------|------------|--------------|------------|--------------|
| FMNL2          | formin-like 2                                    | chr2q23.3              | cytoskeleton organization                                                       | ---                                  | 1.03          | 1.21            | -1.10     | -1.31       | 1.09      | 1.02        | 1.05       | 1.06         | 1.33       | 1.28         | 1.41       | 1.31         |
| FMNL2          | formin-like 2                                    | chr2q23.3              | cytoskeleton organization                                                       | ---                                  | 1.04          | -1.07           | 1.02      | -1.03       | 1.16      | 1.15        | 1.41       | 1.11         | 2.37       | 1.69         | 1.94       | 1.81         |
| FMO4           | flavin containing monooxygenase 4                | chr1q24.3              | xenobiotic metabolic process                                                    | ---                                  | -1.92         | -1.26           | -1.38     | 1.25        | 1.79      | 1.78        | -6.54      | -2.80        | -1.51      | 1.48         | 9.05       | 5.43         |
| FMR1           | fragile X mental retardation 1                   | chrXq27.3              | transport                                                                       | ---                                  | 1.08          | 1.13            | 1.01      | -1.07       | 1.02      | 1.02        | -1.11      | -1.06        | -1.51      | -1.24        | -1.34      | -1.54        |
| FMR1           | fragile X mental retardation 1                   | chrXq27.3              | transport                                                                       | ---                                  | 1.06          | 1.02            | -1.07     | -1.07       | -1.24     | -1.13       | -1.08      | -1.08        | -1.33      | -1.14        | -1.19      | -1.32        |
| FNBP4          | formin binding protein 4                         | chr1p11.2              | 0                                                                               | ---                                  | -1.04         | -1.10           | 1.05      | 1.07        | -1.03     | 1.17        | 1.02       | 1.10         | -1.22      | -1.09        | -1.24      | -1.08        |
| FNDC1          | fibronectin type III domain containing 1         | chr6q25                | positive regulation of protein phosphorylation                                  | ---                                  | 1.07          | 1.27            | -1.52     | -1.20       | -1.05     | 1.06        | 1.16       | 1.26         | -1.57      | -1.25        | -1.66      | -1.55        |
| FNDC3A         | fibronectin type III domain containing 3A        | chr13q14.2             | spermatid development                                                           | ---                                  | 1.35          | 1.15            | 1.02      | -1.22       | -1.46     | -1.09       | 1.43       | 1.29         | 2.16       | 1.85         | 1.80       | 1.51         |
| FNDC3A         | fibronectin type III domain containing 3A        | chr13q14.2             | spermatid development                                                           | ---                                  | 1.18          | 1.18            | 1.61      | 1.17        | 1.09      | -1.10       | -1.06      | 1.03         | 1.29       | 1.42         | 1.64       | 2.01         |
| FNDC3A         | fibronectin type III domain containing 3A        | chr13q14.2             | spermatid development                                                           | ---                                  | 1.32          | -1.08           | 1.36      | 1.11        | 1.08      | 1.19        | -1.03      | 1.19         | 1.10       | 1.21         | 1.60       | 1.66         |
| FNDC3B         | fibronectin type III domain containing 3B        | chr3q26.31             | positive regulation of fat cell differentiation                                 | ---                                  | -1.07         | -1.15           | 1.13      | -1.50       | 1.04      | 1.04        | 1.02       | -1.13        | 1.74       | 1.43         | 2.29       | 1.20         |
| FNDC3B         | fibronectin type III domain containing 3B        | chr3q26.31             | positive regulation of fat cell differentiation                                 | ---                                  | 1.18          | -1.24           | -1.12     | -1.18       | -1.11     | 1.20        | -1.28      | -1.58        | 1.12       | 1.07         | 2.00       | 1.72         |
| FNDC3B         | fibronectin type III domain containing 3B        | chr3q26.31             | positive regulation of fat cell differentiation                                 | ---                                  | 1.21          | 1.16            | 1.02      | -1.26       | -1.09     | 1.00        | 1.17       | 1.07         | 1.28       | 1.34         | 1.60       | 1.33         |
| FNDC3B         | fibronectin type III domain containing 3B        | chr3q26.31             | positive regulation of fat cell differentiation                                 | ---                                  | -1.08         | -1.06           | 1.08      | -1.27       | -1.10     | 1.13        | -1.04      | -1.01        | 1.34       | 1.39         | 1.28       | 1.20         |
| FNDC3B         | fibronectin type III domain containing 3B        | chr3q26.31             | positive regulation of fat cell differentiation                                 | ---                                  | 1.06          | -1.20           | 1.30      | -1.15       | -1.16     | 1.02        | 1.35       | 1.17         | 1.10       | 1.35         | 1.33       | 1.34         |
| FNDC3B         | fibronectin type III domain containing 3B        | chr3q26.31             | positive regulation of fat cell differentiation                                 | ---                                  | -1.18         | -1.41           | -1.50     | -1.64       | 1.75      | -1.22       | 1.31       | 1.26         | 1.60       | 1.28         | 1.50       | 1.44         |
| FNIP1          | folliculin interacting protein 1                 | chr5q23.3              | negative regulation of transcription from RNA polymerase II promoter            | ---                                  | 1.03          | -1.00           | -1.12     | -1.05       | 1.41      | 1.03        | 1.34       | 1.19         | 1.63       | 1.27         | 2.32       | 2.10         |
| FNIP1 // RAB11 | folliculin interacting protein 1                 | chr5q23.3 // chr5q23.3 | negative regulation of transcription from RNA polymerase II promoter            | ---                                  | 1.01          | 1.01            | 1.18      | -1.05       | 1.11      | 1.05        | -1.26      | -1.16        | -1.88      | -1.63        | 1.28       | 1.08         |
| FNIP1 // RAB11 | folliculin interacting protein 1                 | chr5q23.3 // chr5q23.3 | negative regulation of transcription from RNA polymerase II promoter            | ---                                  | -1.15         | -1.12           | 1.02      | 1.01        | 1.04      | 1.01        | -1.22      | -1.10        | -1.76      | -1.46        | 1.03       | -1.04        |
| FNIP2          | folliculin interacting protein 2                 | chr4q32.1              | negative regulation of transcription from RNA polymerase II promoter            | ---                                  | -1.05         | -1.09           | 1.11      | 1.14        | -1.11     | 1.06        | -1.14      | -1.09        | -1.27      | -1.03        | -1.19      | -1.46        |
| FNIP2          | folliculin interacting protein 2                 | chr4q32.1              | negative regulation of transcription from RNA polymerase II promoter            | ---                                  | 1.68          | 2.05            | -2.82     | -1.74       | 3.16      | 1.64        | -1.07      | 1.34         | 2.89       | 7.42         | 1.01       | 1.58         |
| FNIP2          | folliculin interacting protein 2                 | chr4q32.1              | negative regulation of transcription from RNA polymerase II promoter            | ---                                  | 1.18          | -1.08           | 1.08      | 1.01        | -1.09     | 1.02        | -1.35      | -1.08        | -1.57      | -1.29        | -1.52      | -1.65        |
| FNTA           | farnesyltransferase, CAAX domain containing 1    | chr8p11                | apoptotic process                                                               | ---                                  | -1.02         | -1.02           | -1.08     | -1.02       | -1.06     | -1.07       | 1.14       | 1.08         | 1.21       | 1.10         | 1.25       | 1.38         |
| FNTA           | farnesyltransferase, CAAX domain containing 1    | chr8p11                | apoptotic process                                                               | ---                                  | 1.12          | -1.01           | 1.10      | 1.05        | 1.06      | 1.03        | 1.14       | 1.01         | 1.25       | 1.29         | 1.63       | 1.75         |
| FNTB           | farnesyltransferase, CAAX domain containing 2    | chr14q23.3             | negative regulation of cell proliferation                                       | ---                                  | 1.12          | -1.06           | 1.83      | 1.14        | -1.14     | 1.13        | 1.10       | -1.07        | -1.40      | 1.18         | 1.37       | 1.45         |
| FOCAD          | focadhesin                                       | chr9p21                | 0                                                                               | ---                                  | -1.01         | -1.03           | 1.08      | 1.10        | -1.04     | -1.02       | 1.03       | 1.06         | -1.14      | -1.15        | -1.20      | -1.04        |
| POPPL          | FGFR1OP N-terminal like 1                        | chr16p13.11            | cell projection organization                                                    | ---                                  | -1.09         | 1.02            | 1.10      | -1.18       | 1.09      | -1.10       | 1.18       | 1.17         | 1.22       | 1.13         | 2.32       | 1.65         |
| FOS            | FBJ murine osteosarcoma fusion protein           | chr14q24.3             | conditioned taste aversion                                                      | Smooth_muscle_contraction // GenMAPP | 1.27          | 1.20            | -1.34     | -1.09       | 1.59      | 1.36        | 1.52       | 1.06         | 1.46       | 1.37         | 1.56       | 1.31         |
| FOSB           | FBJ murine osteosarcoma fusion protein B         | chr19q13.32            | negative regulation of transcription from RNA polymerase II promoter            | ---                                  | 1.45          | 1.23            | -1.23     | 1.02        | -1.10     | 1.21        | 1.01       | 1.12         | 25.91      | 14.68        | 16.92      | 11.08        |
| FOSL1          | FOS-like antigen 1                               | chr11q13               | in utero embryonic development                                                  | Wnt_signaling // GenMAPP             | 1.21          | 1.20            | -1.12     | 1.03        | 1.15      | 1.06        | 2.30       | 1.53         | 9.31       | 5.58         | 6.53       | 5.17         |
| FOSL2          | FOS-like antigen 2                               | chr2p23.3              | transcription, DNA-dependent                                                    | ---                                  | 1.26          | 1.10            | 1.39      | 1.26        | 1.18      | 1.07        | 1.49       | -1.06        | 1.01       | -1.07        | 2.12       | 1.91         |
| FOSL2          | FOS-like antigen 2                               | chr2p23.3              | transcription, DNA-dependent                                                    | ---                                  | 1.10          | 1.03            | 1.05      | 1.28        | -1.01     | 1.00        | 1.67       | 1.38         | 2.87       | 3.05         | 3.00       | 2.88         |
| FOSL2          | FOS-like antigen 2                               | chr2p23.3              | transcription, DNA-dependent                                                    | ---                                  | -1.34         | -1.09           | 1.03      | -1.03       | -1.00     | 1.06        | 1.83       | 1.07         | 2.17       | 2.16         | 4.33       | 4.02         |
| FOSL2          | FOS-like antigen 2                               | chr2p23.3              | transcription, DNA-dependent                                                    | ---                                  | 1.36          | 1.41            | 1.15      | 1.09        | 1.00      | 1.14        | 1.01       | 1.15         | 1.07       | 1.08         | 1.38       | 1.17         |
| FOXC1          | forkhead box C1                                  | chr6p25                | negative regulation of transcription from RNA polymerase II promoter            | ---                                  | -1.06         | -1.15           | -1.01     | 1.01        | -1.12     | -1.02       | -1.14      | 1.04         | 1.35       | 1.39         | 1.18       | 1.17         |
| FOXC1          | forkhead box C1                                  | chr6p25                | negative regulation of transcription from RNA polymerase II promoter            | ---                                  | 1.05          | 1.05            | 1.03      | 1.06        | 1.06      | -1.17       | 1.18       | 1.22         | 2.43       | 1.49         | 1.52       | 1.72         |
| FOXC2          | NULL                                             | ---                    | negative regulation of transcription from RNA polymerase II promoter            | ---                                  | -1.21         | -1.31           | -1.16     | -1.08       | -1.31     | -1.21       | 1.67       | 1.34         | 3.07       | 1.88         | 1.34       | 1.45         |
| FOXD3          | forkhead box D3                                  | chr1p31.3              | negative regulation of transcription from RNA polymerase II promoter            | ---                                  | 1.75          | -1.35           | 1.92      | 1.26        | -1.35     | 3.38        | -1.48      | 1.59         | 1.23       | -2.72        | -2.71      | 1.62         |
| FOXE1          | forkhead box E1 (thyroid transcription factor 1) | chr9q22                | negative regulation of transcription from RNA polymerase II promoter            | ---                                  | -1.00         | -1.02           | 1.08      | 1.25        | 1.03      | 1.04        | -1.03      | 1.03         | -1.25      | -1.75        | -1.04      | -1.06        |
| FOXF1          | forkhead box F1                                  | chr16q24               | negative regulation of transcription from RNA polymerase II promoter            | ---                                  | 1.07          | 1.03            | 1.19      | -1.00       | 1.10      | 1.12        | -1.20      | -1.07        | -1.30      | -1.18        | -1.12      | -1.40        |
| FOXF2          | forkhead box F2                                  | chr6p25.3              | epithelial to mesenchymal transition                                            | ---                                  | 1.01          | -1.03           | -1.03     | -1.03       | -1.05     | 1.02        | -1.01      | -1.05        | -1.51      | -1.32        | -1.51      | -1.39        |
| FOXG1          | forkhead box G1                                  | chr14q13               | positive regulation of neuroblast proliferation                                 | ---                                  | 2.70          | 1.56            | -3.21     | 1.00        | 2.50      | 3.23        | 7.82       | 3.83         | 5.04       | 1.10         | 1.37       | 1.24         |
| FOXG1          | forkhead box G1                                  | chr14q13               | positive regulation of neuroblast proliferation                                 | ---                                  | 3.60          | 4.03            | 2.96      | 2.81        | -2.23     | -2.27       | 1.75       | 2.19         | 2.38       | 1.92         | 1.09       | 1.36         |
| FOXH1          | forkhead box H1                                  | chr8q24.3              | negative regulation of transcription from TGF_Beta_Signaling_Pathway // GenMAPP | ---                                  | -1.11         | 2.67            | 1.14      | 1.33        | -1.23     | -2.62       | 1.24       | -2.62        | -2.24      | -2.36        | -1.27      | -3.16        |
| FOXJ2          | forkhead box J2                                  | chr12p13.31            | transcription, DNA-dependent                                                    | ---                                  | 1.35          | 1.29            | -1.41     | 1.18        | -1.19     | 1.18        | -2.02      | -1.04        | 3.44       | 2.06         | 1.24       | 1.79         |
| FOXK1          | forkhead box K1                                  | chr7p22.1              | transcription, DNA-dependent                                                    | ---                                  | -1.54         | -1.98           | -1.13     | -1.75       | -2.62     | -1.48       | -1.69      | -2.12        | 4.66       | 1.80         | 3.10       | 2.49         |
| FOXK1          | forkhead box K1                                  | chr7p22.1              | pattern specification process                                                   | ---                                  | -1.29         | -1.09           | -1.32     | 1.20        | -1.19     | -2.16       | 2.32       | 1.63         | -1.14      | -1.03        | 1.49       | 1.52         |
| FOXK1          | forkhead box K1                                  | chr7p22.1              | pattern specification process                                                   | ---                                  | 2.94          | 1.40            | -2.36     | -1.17       | 1.15      | -1.04       | 1.08       | 3.01         | 4.86       | 4.72         | 1.39       | -1.45        |
| FOXK2          | forkhead box K2                                  | chr17q25               | transcription, DNA-dependent                                                    | ---                                  | 1.03          | -1.04           | 1.14      | -1.07       | 1.02      | 1.13        | 1.06       | 1.20         | -1.10      | -1.20        | 1.59       | 1.12         |
| FOXK2          | forkhead box K2                                  | chr17q25               | transcription, DNA-dependent                                                    | ---                                  | -1.01         | 1.02            | 1.31      | 1.08        | 1.25      | -1.02       | 1.13       | 1.19         | 1.57       | 1.82         | 1.80       | 1.76         |
| FOXK2          | forkhead box K2                                  | chr17q25               | transcription, DNA-dependent                                                    | ---                                  | 1.04          | -1.04           | 1.05      | -1.02       | -1.12     | -1.09       | -1.11      | -1.10        | -1.11      | -1.09        | 1.07       | 1.12         |
| FOXK2          | forkhead box K2                                  | chr17q25               | transcription, DNA-dependent                                                    | ---                                  | -1.06         | 1.16            | 1.16      | 1.08        | -1.87     | 1.22        | 1.46       | 3.59         | 4.23       | 1.12         | 1.25       | 1.25         |
| FOXL1          | forkhead box L1                                  | chr16q24               | transcription, DNA-dependent                                                    | ---                                  | 1.02          | -1.10           | -1.27     | -1.14       | 1.23      | 1.38        | 1.12       | -1.10        | 2.89       | 1.83         | 1.75       | 1.78         |
| FOXL2          | forkhead box L2                                  | chr3q23                | negative regulation of transcription from RNA polymerase II promoter            | ---                                  | 1.11          | 1.16            | 1.25      | -1.08       | -1.05     | -1.06       | -1.28      | -1.01        | -1.05      | -1.31        | -1.05      | -1.27        |
| FOXN1          | forkhead box N1                                  | chr17q11-q12           | negative regulation of transcription from RNA polymerase II promoter            | ---                                  | -1.17         | -1.23           | 1.37      | 1.70        | -1.40     | -1.24       | 1.17       | 1.29         | -1.44      | -1.72        | -1.68      | -1.42        |
| FOXN2          | forkhead box N2                                  | chr2p22-p16            | transcription, DNA-dependent                                                    | ---                                  | 1.11          | 1.15            | -1.10     | -1.58       | -1.25     | -1.15       | -1.07      | -1.07        | 1.42       | 1.23         | 1.80       | 1.32         |
| FOXN3          | forkhead box N3                                  | chr14q31.3             | DNA damage checkpoint                                                           | ---                                  | -1.03         | -1.00           | -1.03     | 1.04        | 1.05      | 1.02        | 1.09       | 1.01         | -1.39      | -1.18        | -1.74      | -1.45        |
| FOXN3          | forkhead box N3                                  | chr14q31.3             | DNA damage checkpoint                                                           | ---                                  | -1.07         | -1.13           | 1.14      | 1.10        | 1.11      | 1.04        | 1.05       | -1.15        | -1.32      | -1.19        | -1.38      | -1.37        |
| FOXN3          | forkhead box N3                                  | chr14q31.3             | DNA damage checkpoint                                                           | ---                                  | 1.33          | 1.25            | 1.20      | 1.13        | 1.02      | 1.09        | 1.01       | -1.02        | -1.66      | -1.70        | -1.46      | -1.46        |
| FOXN3-AS1      | FOXN3 antisense RNA 1                            | chr14q32.11            | 0                                                                               | ---                                  | 1.23          | 1.06            | 1.09      | 1.26        | 1.01      | 1.06        | 1.20       | 1.50         | -2.99      | -1.92        | -2.84      | -2.90        |
| FOXN3-AS1      | FOXN3 antisense RNA 1                            | chr14q32.11            | 0                                                                               | ---                                  | 1.09          | 1.26            | 1.02      | 1.31        | -1.29     | -1.33       | -1.09      | -1.03        | -1.76      | -1.64        | -2.35      | -2.22        |
| FOXN4          | forkhead box N4                                  | chr12q24.11            | transcription, DNA-dependent                                                    | ---                                  | 1.18          | 1.20            | -1.16     | -1.33       | 1.85      | 1.72        | -1.25      | 1.08         | -1.68      | -1.26        | -1.25      | -1.09        |
| FOXO1          | forkhead box O1                                  | chr13q14.1             | blood vessel development                                                        | ---                                  | 1.05          | 1.01            | 1.09      | 1.04        | 1.02      | 1.03        | 1.14       | 1.11         | -1.10      | -1.32        | 1.22       | 1.06         |
| FOXO1          | forkhead box O1                                  | chr13q14.1             | blood vessel development                                                        | ---                                  | -1.74         | -1.46           | -1.02     | -1.33       | 1.16      | 1.02        | 1.56       | 1.16         | 1.20       | 1.06         | 1.48       | 1.41         |
| FOXO3          | forkhead box O3                                  | chr6q21                | negative regulation of transcription from RNA polymerase II promoter            | ---                                  | -1.12         | -1.12           | -1.07     | -1.02       | 1.17      | 1.06        | 1.09       | 1.09         | 1.18       | 1.17         | 1.23       | 1.26         |
| FOXO3 // FGF   | forkhead box O3 // forkhead box O3               | chr17p11.2 // chr6q21  | negative regulation of transcription from RNA polymerase II promoter            | ---                                  | -1.25         | -1.00           | 1.15      | 1.45        | 1.01      | -1.05       | -1.10      | -1.02        | 1.02       | 1.05         | 1.08       | 1.18         |

| ID           | Gene Title                                        | Chromosomal Location | 1st Gene Ontology Biological Process                    | Pathway                                 | A2497 30 mins | A2497P' 30 mins | A2497 2 h | A2497P' 2 h | A2497 4 h | A2497P' 4 h | A2497 24 h | A2497P' 24 h | A2497 48 h | A2497P' 48 h | A2497 72 h | A2497P' 72 h |
|--------------|---------------------------------------------------|----------------------|---------------------------------------------------------|-----------------------------------------|---------------|-----------------|-----------|-------------|-----------|-------------|------------|--------------|------------|--------------|------------|--------------|
| FOXO3 /// F  | forkhead box O3 /// forkhead                      | chr17p11.2 /// chr6  | negative regulation of transcription from               | ---                                     | -1.08         | -1.06           | 1.16      | 1.10        | 1.13      | 1.20        | 1.12       | -1.07        | 1.18       | 1.18         | 1.11       | 1.17         |
| FOXO4        | forkhead box O4                                   | chrXq13.1            | G1 phase of mitotic cell cycle                          | ---                                     | -1.12         | -1.19           | 1.03      | 1.03        | -1.13     | 1.05        | -1.39      | -1.24        | -1.67      | -1.20        | -1.46      | -1.22        |
| FOXP1        | forkhead box P1                                   | chr3p14.1            | in utero embryonic development                          | ---                                     | 1.02          | -1.23           | 1.32      | 1.41        | 1.02      | -1.16       | -1.25      | -1.00        | -1.62      | -1.51        | -1.68      | -2.04        |
| FOXP1        | forkhead box P1                                   | chr3p14.1            | in utero embryonic development                          | ---                                     | -1.29         | -1.36           | -1.28     | -1.14       | -1.16     | -1.29       | -1.05      | -1.12        | -2.37      | -2.09        | -1.90      | -1.58        |
| FOXP1        | forkhead box P1                                   | chr3p14.1            | in utero embryonic development                          | ---                                     | -1.06         | -1.08           | -1.13     | -1.02       | -1.12     | 1.01        | 1.08       | -1.04        | -1.17      | -1.28        | -1.02      | -1.06        |
| FOXP1        | forkhead box P1                                   | chr3p14.1            | in utero embryonic development                          | ---                                     | 1.03          | -1.05           | 1.04      | 1.01        | -1.26     | -1.35       | -1.14      | -1.13        | -2.72      | -2.14        | -1.42      | -1.33        |
| FOXP1-IT1    | FOXP1 intronic transcript 1                       | ---                  | 0                                                       | ---                                     | 1.29          | 1.34            | 1.09      | 1.30        | 1.11      | -1.11       | 1.34       | 1.46         | -2.32      | -2.78        | -1.89      | -1.29        |
| FOXP2        | forkhead box P2                                   | chr7q31              | negative regulation of transcription from               | ---                                     | -1.17         | -1.22           | 1.08      | 1.06        | 1.10      | 1.07        | 1.08       | -1.03        | -1.65      | -1.50        | -2.02      | -1.87        |
| FOXP2        | forkhead box P2                                   | chr7q31              | negative regulation of transcription from               | ---                                     | 1.30          | 1.10            | -1.09     | -1.24       | -1.60     | -1.06       | -1.12      | 1.13         | -2.28      | -1.97        | -2.28      | -2.23        |
| FOXP2        | forkhead box P2                                   | chr7q31              | negative regulation of transcription from               | ---                                     | 1.26          | 1.25            | -1.16     | -1.67       | -1.04     | 1.07        | 1.30       | 1.35         | -3.57      | -2.09        | -1.58      | -1.49        |
| FOXP2        | forkhead box P2                                   | chr7q31              | negative regulation of transcription from               | ---                                     | -1.30         | 1.38            | -1.49     | 1.22        | -1.33     | -1.88       | 1.31       | 1.35         | -1.67      | -1.28        | 5.32       | 3.92         |
| FOXQ1        | forkhead box Q1                                   | chr6p25              | negative regulation of transcription from               | ---                                     | -1.01         | 1.11            | -1.15     | -1.24       | -1.20     | -1.18       | -1.23      | -1.10        | -1.81      | -1.91        | -1.09      | -1.21        |
| FOXRED1      | FAD-dependent oxidoreductase                      | chr11q24.2           | oxidation-reduction process                             | ---                                     | -1.09         | -1.05           | -1.01     | 1.08        | 1.04      | -1.06       | 1.11       | 1.11         | -1.09      | -1.08        | -1.27      | -1.12        |
| FOXRED2      | FAD-dependent oxidoreductase                      | chr22q12.3           | ER-associated protein catabolic process                 | ---                                     | -1.33         | -1.13           | -1.02     | -1.19       | -1.07     | -1.35       | -1.36      | 1.04         | -1.84      | -1.55        | -2.03      | -1.74        |
| FOXRED2      | FAD-dependent oxidoreductase                      | chr22q12.3           | ER-associated protein catabolic process                 | ---                                     | -1.24         | -1.17           | 1.05      | -1.14       | -1.11     | -1.44       | 1.07       | -1.02        | -1.58      | -1.42        | -2.23      | -2.80        |
| FOXRED2      | FAD-dependent oxidoreductase                      | chr22q12.3           | ER-associated protein catabolic process                 | ---                                     | -1.16         | -1.13           | -1.03     | -1.06       | 1.04      | 1.20        | -1.13      | 1.10         | -1.75      | -1.67        | -1.66      | -1.88        |
| FPGS         | folylpolyglutamate synthase                       | chr9q34.1            | liver development                                       | ---                                     | -1.19         | -1.22           | 1.06      | -1.00       | -1.01     | 1.09        | -1.01      | 1.03         | 1.33       | 1.27         | 1.00       | 1.13         |
| FPGT         | fucose-1-phosphate guanylyltransferase            | chr1p31.1            | fucose metabolic process                                | ---                                     | 1.14          | 1.51            | -1.16     | 1.65        | -1.25     | -1.17       | -1.87      | -1.18        | -1.49      | -2.02        | -1.39      | -2.07        |
| FPR1         | formyl peptide receptor 1                         | chr19q13.4           | activation of MAPK activity                             | GPCRDB_Class_A_Rhodopsin-like // GenMap | -1.42         | -1.20           | 2.95      | 2.83        | -5.03     | -1.57       | -1.45      | -2.03        | 6.48       | 1.70         | -1.16      | -3.21        |
| FR10A0C1     | fragile site, folic acid type                     | chr10q23.33          | 0                                                       | ---                                     | -1.05         | 1.04            | -1.02     | 1.16        | 1.02      | 1.00        | 1.03       | 1.20         | 1.32       | 1.12         | 1.18       | 1.19         |
| FRAS1        | Fraser syndrome 1                                 | chr4q21.21           | morphogenesis of an epithelium                          | ---                                     | 1.04          | 1.06            | 1.15      | 1.09        | -1.08     | 1.04        | -1.10      | -1.07        | -1.25      | 1.08         | -1.82      | -1.91        |
| FRAS1        | Fraser syndrome 1                                 | chr4q21.21           | morphogenesis of an epithelium                          | ---                                     | -1.98         | -2.73           | 1.16      | 1.97        | 1.19      | 1.21        | -1.38      | -1.21        | 4.51       | 3.31         | 2.12       | 1.64         |
| FRAS1        | Fraser syndrome 1                                 | chr4q21.21           | morphogenesis of an epithelium                          | ---                                     | 1.51          | 1.23            | 1.23      | 1.09        | 1.38      | 1.22        | 1.32       | 1.14         | 1.39       | 1.56         | 1.35       | 1.37         |
| FRAT1        | frequently rearranged in adenocarcinoma           | chr10q24.1           | embryonic axis specification                            | Wnt_signaling // GenMap                 | 1.26          | 1.39            | -1.16     | -1.02       | 1.07      | 1.02        | -1.50      | -1.26        | -1.83      | -1.87        | -1.80      | -1.65        |
| FRAT2        | frequently rearranged in adenocarcinoma           | chr10q24.1           | multicellular organismal development                    | ---                                     | -1.09         | -1.11           | -1.00     | -1.04       | 1.13      | -1.03       | -1.19      | -1.17        | -1.63      | -1.77        | -1.33      | -1.32        |
| PREM1        | FRAS1 related extracellular matrix protein        | chr9p22.3            | cell communication                                      | ---                                     | 1.95          | 1.57            | 1.90      | 1.22        | -1.16     | 2.19        | -2.90      | -1.82        | 3.62       | 1.74         | -2.79      | -3.18        |
| PREM2        | FRAS1 related extracellular matrix protein        | chr13q13.3           | morphogenesis of an epithelium                          | ---                                     | -1.02         | 1.01            | 1.20      | 1.30        | 1.14      | 1.04        | 1.31       | -1.04        | -4.01      | -2.71        | -5.12      | -6.58        |
| FRG1B        | FSHD region gene 1 family class B member          | chr20q11.21          | 0                                                       | ---                                     | 1.08          | 1.36            | 1.10      | 2.07        | -1.04     | 1.25        | -3.50      | -2.20        | -1.27      | -1.06        | 2.35       | 3.11         |
| FRMD3        | FERM domain containing 3                          | chr9q21.32           | 0                                                       | ---                                     | 1.04          | -1.05           | 1.19      | 1.32        | 1.13      | -1.05       | -1.06      | 1.09         | -1.90      | -1.88        | -2.33      | -2.84        |
| FRMD3        | FERM domain containing 3                          | chr9q21.32           | 0                                                       | ---                                     | 1.05          | -1.06           | 1.13      | -1.06       | 1.05      | 1.10        | -1.09      | 1.11         | -2.01      | -1.76        | -1.95      | -2.41        |
| FRMD3        | FERM domain containing 3                          | chr9q21.32           | 0                                                       | ---                                     | -1.08         | -1.51           | -1.02     | 1.12        | 1.95      | 1.93        | 1.35       | 1.34         | -3.44      | -1.65        | -1.47      | -1.60        |
| FRMD4A       | FERM domain containing 4A                         | chr10p13             | establishment of epithelial cell polarity               | ---                                     | 1.11          | 1.04            | 1.95      | 1.11        | 1.52      | -1.30       | 1.62       | 1.65         | 1.35       | 1.74         | -1.44      | -1.72        |
| FRMD4B       | FERM domain containing 4B                         | chr3p14.1            | establishment of epithelial cell polarity               | ---                                     | 1.13          | 1.30            | 1.82      | 1.50        | 1.25      | 1.80        | -1.31      | 1.80         | 2.17       | 2.21         | 1.11       | 1.45         |
| FRMD6        | FERM domain containing 6                          | chr14q22.1           | apical constriction                                     | ---                                     | 1.05          | -1.08           | -1.07     | -1.09       | -1.10     | 1.08        | 1.22       | 1.06         | 2.06       | 1.81         | 2.46       | 1.93         |
| FRMD6        | FERM domain containing 6                          | chr14q22.1           | apical constriction                                     | ---                                     | 1.03          | 1.18            | 1.01      | -1.19       | -1.14     | -1.08       | -1.05      | -1.25        | 2.18       | 2.04         | 3.04       | 1.99         |
| FRMD8        | FERM domain containing 8                          | chr11q13             | 0                                                       | ---                                     | -1.52         | -1.29           | 1.06      | 1.06        | -1.29     | 1.05        | 1.90       | 1.39         | 4.09       | 3.89         | 3.19       | 1.73         |
| FRMD8        | FERM domain containing 8                          | chr11q13             | 0                                                       | ---                                     | -1.49         | -1.09           | 1.02      | 1.02        | -2.28     | -1.35       | 1.18       | 1.32         | 6.23       | 3.10         | -1.15      | -1.30        |
| FRMD8        | FERM domain containing 8                          | chr11q13             | 0                                                       | ---                                     | 1.11          | 1.11            | 1.02      | -1.03       | -1.03     | 1.08        | -1.13      | -1.17        | -1.14      | -1.31        | -1.01      | -1.16        |
| FRMPD3       | FERM and PDZ domain containing 3                  | chrXq22              | 0                                                       | ---                                     | 1.05          | 1.09            | 1.20      | 1.69        | 1.86      | 3.55        | 1.50       | 1.28         | -1.89      | -1.76        | 1.62       | 1.24         |
| FRS2         | fibroblast growth factor receptor 2               | chr12q15             | activation of MAPKK activity                            | ---                                     | 1.13          | 1.17            | -1.03     | -1.03       | -1.00     | 1.07        | -1.56      | -1.14        | -1.46      | -1.35        | -1.10      | -1.19        |
| FRS2         | fibroblast growth factor receptor 2               | chr12q15             | activation of MAPKK activity                            | ---                                     | -1.01         | 1.17            | 1.06      | -1.00       | -1.45     | -1.01       | 1.48       | -1.38        | 1.03       | -1.13        | 3.17       | 3.82         |
| FRS3         | fibroblast growth factor receptor 3               | chr6p21.1            | signal transduction                                     | ---                                     | 1.43          | 1.81            | 1.01      | 1.14        | 1.00      | -1.02       | 1.16       | 1.36         | -1.46      | -1.21        | -1.29      | -1.51        |
| FRY          | furry homolog (Drosophila)                        | chr13q13.1           | 0                                                       | ---                                     | -1.07         | -1.25           | 1.05      | 1.17        | -1.26     | -1.29       | 1.48       | 1.16         | 1.63       | 2.70         | 1.15       | 1.38         |
| FRY          | furry homolog (Drosophila)                        | chr13q13.1           | 0                                                       | ---                                     | -1.33         | -1.42           | -1.26     | 1.07        | -1.35     | -1.05       | 1.05       | -1.01        | 1.71       | 2.00         | 1.16       | 1.27         |
| FRY          | furry homolog (Drosophila)                        | chr13q13.1           | 0                                                       | ---                                     | 1.81          | 1.46            | 1.30      | 1.14        | 1.06      | 1.16        | 1.03       | 1.03         | -2.89      | -2.50        | -2.18      | -2.32        |
| FRYL         | FRY-like                                          | chr4p11              | transcription, DNA-dependent                            | ---                                     | -1.09         | -1.00           | 1.08      | -1.02       | 1.15      | 1.10        | -1.22      | -1.09        | -1.71      | -1.37        | -1.03      | -1.25        |
| FRYL         | FRY-like                                          | chr4p11              | transcription, DNA-dependent                            | ---                                     | -1.06         | 1.07            | -1.03     | -1.12       | 1.08      | -1.00       | -1.05      | -1.06        | -1.47      | -1.14        | -1.10      | 1.10         |
| FRYL         | FRY-like                                          | chr4p11              | transcription, DNA-dependent                            | ---                                     | 1.12          | 1.34            | 2.11      | 1.66        | -1.88     | -1.35       | -1.03      | -1.01        | -1.50      | 1.11         | 1.19       | -1.11        |
| FSBP /// RAD | fibrinogen silencer binding protein               | chr8q /// chr8q22.1  | double-strand break repair via homologous recombination | ---                                     | 1.31          | 1.35            | -1.01     | -1.05       | -1.15     | 1.32        | -1.29      | 1.06         | -1.13      | -1.53        | 2.11       | 1.06         |
| FSCB         | fibrous sheath CABYR binding protein              | chr14q21.2           | peptidyl-serine phosphorylation                         | ---                                     | 1.65          | 3.30            | -2.68     | -1.72       | -1.55     | -2.40       | -2.68      | 2.38         | 1.96       | 1.55         | 1.05       | 1.46         |
| FSCN1        | fascin homolog 1, actin-bundling protein          | chr7p22              | cell proliferation                                      | ---                                     | 1.04          | 1.04            | 1.00      | -1.01       | 1.03      | 1.07        | 1.08       | 1.03         | 1.28       | 1.20         | 1.19       | 1.22         |
| FSD1         | fibronectin type III and SP1 domain containing 1  | chr19p13.3           | cell cycle                                              | ---                                     | 1.15          | -1.19           | -1.52     | -2.11       | -4.17     | -3.21       | -1.68      | -2.12        | 1.39       | 1.07         | -1.22      | -2.35        |
| FSD1L        | fibronectin type III and SP1 domain containing 1L | chr9q31              | 0                                                       | ---                                     | 1.39          | 1.09            | -1.01     | -1.11       | 1.02      | 1.09        | -1.20      | -1.06        | -2.08      | -1.59        | -2.00      | -2.00        |
| FSD1L        | fibronectin type III and SP1 domain containing 1L | chr9q31              | 0                                                       | ---                                     | 1.10          | 1.09            | 1.08      | 1.31        | -1.14     | 1.02        | 1.18       | -1.48        | 1.08       | -1.24        | 1.45       | 1.71         |
| FST          | folliculin                                        | chr5q11.2            | negative regulation of transcription from enhancer      | TGF_Beta_Signaling_Pathway // GenMap    | -1.15         | -1.16           | 1.10      | 1.01        | 1.11      | 1.03        | 1.33       | 1.22         | 1.61       | 1.14         | 1.48       | 1.45         |
| FSTL1        | folliculin-like 1                                 | chr3q13.33           | BMP signaling pathway                                   | ---                                     | -1.03         | 1.01            | 1.03      | 1.02        | 1.11      | 1.02        | 1.06       | -1.01        | 1.07       | 1.00         | 1.01       | -1.15        |
| FSTL3        | folliculin-like 3 (secreted)                      | chr19p13             | ossification                                            | ---                                     | 1.00          | 1.06            | 1.11      | 1.23        | 1.09      | -1.08       | 1.06       | 1.15         | 2.21       | 1.84         | 2.63       | 2.70         |
| FSTL4        | folliculin-like 4                                 | chr5q31.1            | 0                                                       | ---                                     | -1.09         | -1.16           | 1.02      | 1.05        | 1.14      | 1.07        | 1.36       | 1.15         | -1.43      | -1.42        | -2.48      | -2.32        |
| FSTL4        | folliculin-like 4                                 | chr5q31.1            | 0                                                       | ---                                     | -1.15         | 1.14            | -1.02     | 1.57        | -1.97     | 1.22        | 1.09       | -1.78        | -1.35      | 1.01         | -1.45      | -2.25        |
| FSTL4        | folliculin-like 4                                 | chr5q31.1            | 0                                                       | ---                                     | -1.01         | -1.02           | 1.04      | -1.19       | 1.01      | 1.02        | 1.02       | -1.06        | -1.33      | -1.17        | -1.60      | -1.67        |
| FTCD         | formimidoyltransferase cyclodeaminase             | chr21q22.3           | histidine metabolic process                             | ---                                     | 1.94          | 1.18            | -1.12     | 2.97        | -3.40     | -1.83       | 1.45       | 1.30         | 1.13       | -1.11        | 1.10       | 2.39         |
| FTCDNL1      | formiminotransferase cyclodeaminase like 1        | chr2q33.1            | metabolic process                                       | ---                                     | 1.08          | -1.08           | -1.02     | -1.39       | 1.77      | 1.05        | -1.07      | -1.31        | -1.40      | -1.10        | -2.63      | -3.13        |
| FTLH         | ferritin, heavy polypeptide                       | chr11q13             | iron ion transport                                      | ---                                     | 1.01          | -1.01           | -1.01     | 1.04        | -1.03     | 1.02        | -1.01      | -1.06        | 1.42       | 1.34         | 1.42       | 1.40         |
| FTL          | ferritin, light polypeptide                       | chr19q13.33          | iron ion transport                                      | ---                                     | -1.04         | 1.01            | -1.06     | 1.01        | 1.03      | -1.06       | 1.14       | 1.00         | 1.49       | 1.10         | 1.15       | 1.16         |
| FTO          | fat mass and obesity associated 2                 | chr16q12.2           | temperature homeostasis                                 | ---                                     | 1.06          | 1.06            | -1.04     | -1.01       | 1.01      | 1.06        | -1.02      | -1.08        | 1.09       | 1.08         | -1.10      | -1.13        |
| FTSJ1        | FtsJ RNA methyltransferase                        | chrXp11.23           | RNA methylation                                         | ---                                     | -1.02         | -1.06           | 1.02      | 1.00        | 1.07      | 1.02        | 1.28       | 1.10         | 1.55       | 1.35         | 1.44       | 1.49         |

| ID           | Gene Title                    | Chromosomal Location | 1st Gene Ontology Biological Process      | Pathway                                   | A2497 30 mins | A2497P' 30 mins | A2497 2 h | A2497P' 2 h | A2497 4 h | A2497P' 4 h | A2497 24 h | A2497P' 24 h | A2497 48 h | A2497P' 48 h | A2497 72 h | A2497P' 72 h |
|--------------|-------------------------------|----------------------|-------------------------------------------|-------------------------------------------|---------------|-----------------|-----------|-------------|-----------|-------------|------------|--------------|------------|--------------|------------|--------------|
| FTSJ1        | FtsJ RNA methyltransferase    | chrXp11.23           | RNA methylation                           | ---                                       | -1.00         | 1.06            | -1.05     | 1.01        | -1.01     | 1.01        | 1.03       | -1.05        | 1.15       | 1.14         | 1.12       | 1.12         |
| FTSJ2        | FtsJ RNA methyltransferase    | chr7p22              | RNA methylation                           | ---                                       | -1.02         | -1.11           | 1.03      | 1.01        | 1.24      | 1.13        | 1.01       | -1.07        | 1.02       | -1.01        | 1.14       | 1.18         |
| FTX          | FTX transcript, XIST regul    | chrXq13.2            | 0                                         | ---                                       | 1.39          | 1.19            | 1.08      | -1.04       | 1.11      | 1.30        | -1.23      | -1.29        | -3.90      | -3.32        | -2.71      | -3.51        |
| FUBP1        | far upstream element (FUS)    | chr1p31.1            | transcription, DNA-dependent              | ---                                       | 1.16          | 1.21            | 1.02      | -1.08       | 1.04      | -1.09       | -1.21      | -1.19        | -1.74      | -1.74        | -1.02      | -1.23        |
| FUCA1        | fucosidase, alpha-L-1, tiss   | chr1p34              | carbohydrate metabolic process            | ---                                       | -1.01         | -1.01           | -1.02     | -1.02       | 1.01      | 1.06        | -1.20      | -1.15        | -1.39      | 1.02         | -1.21      | -1.04        |
| FUK          | fucokinase                    | chr16q22.1           | metabolic process                         | ---                                       | -1.09         | -1.19           | 1.02      | 1.23        | 1.13      | 1.05        | 1.18       | 1.27         | 1.05       | 1.01         | -1.59      | -1.28        |
| FUNDC1       | FUN14 domain containing       | chrXp11.3            | mitochondrion degradation                 | ---                                       | 1.05          | 1.07            | 1.01      | -1.10       | 1.00      | 1.00        | -1.10      | -1.08        | -1.14      | -1.14        | -1.22      | -1.27        |
| FUNDC2       | FUN14 domain containing       | chrXq28              | 0                                         | ---                                       | -1.04         | -1.05           | -1.02     | 1.02        | 1.04      | -1.02       | 1.11       | 1.01         | 1.34       | 1.19         | 1.21       | 1.32         |
| FUNDC2       | FUN14 domain containing       | chrXq28              | 0                                         | ---                                       | 1.37          | 1.24            | -1.00     | 1.30        | 1.18      | 1.28        | 1.02       | -1.56        | -1.90      | -1.27        | -2.26      | -1.80        |
| FUOM         | fucose mutarotase             | chr10q26.3           | monosaccharide metabolic process          | ---                                       | -1.07         | -1.26           | -1.23     | -1.20       | 1.21      | -1.20       | 1.49       | 1.30         | 1.01       | 1.23         | -1.28      | -1.89        |
| FUS          | fused in sarcoma              | chr16p11.2           | mRNA splicing, via spliceosome            | mRNA_processing_Reactome // GenMAPP       | -1.03         | -1.00           | 1.02      | -1.03       | 1.16      | -1.08       | -1.06      | 1.02         | -2.06      | -2.37        | -1.66      | -1.76        |
| FUS          | fused in sarcoma              | chr16p11.2           | mRNA splicing, via spliceosome            | mRNA_processing_Reactome // GenMAPP       | 1.01          | 1.05            | 1.11      | 1.02        | 1.26      | 1.02        | -1.20      | -1.26        | -1.87      | -1.94        | -1.84      | -1.97        |
| FUS          | fused in sarcoma              | chr16p11.2           | mRNA splicing, via spliceosome            | mRNA_processing_Reactome // GenMAPP       | 1.21          | 1.25            | -1.47     | -1.35       | 1.07      | 1.11        | -1.67      | -1.21        | -2.14      | -2.80        | -1.46      | -2.07        |
| FUS          | fused in sarcoma              | chr16p11.2           | mRNA splicing, via spliceosome            | mRNA_processing_Reactome // GenMAPP       | -1.15         | -1.09           | -1.06     | -1.03       | -1.00     | -1.04       | -1.31      | -1.15        | -3.31      | -3.36        | -2.16      | -2.11        |
| FUT11        | fucosyltransferase 11 (alpha  | chr10q22.2           | protein glycosylation                     | ---                                       | 1.07          | -1.03           | -1.04     | -1.25       | 1.03      | -1.20       | 1.07       | 1.22         | 1.56       | 2.07         | 2.05       | 3.02         |
| FUT2         | fucosyltransferase 2 (secret  | chr19q13.3           | carbohydrate metabolic process            | ---                                       | 1.02          | 2.67            | 1.12      | -1.05       | 1.94      | 2.93        | 1.56       | 2.60         | 1.16       | 3.27         | 1.10       | 2.32         |
| FUT4         | fucosyltransferase 4 (alpha   | chr11q21             | carbohydrate metabolic process            | ---                                       | -1.03         | -1.12           | -1.04     | -1.09       | 1.16      | 1.29        | -1.49      | -1.49        | -1.37      | -1.19        | 1.04       | 1.01         |
| FUT4         | fucosyltransferase 4 (alpha   | chr11q21             | carbohydrate metabolic process            | ---                                       | -1.05         | 1.07            | 1.04      | 1.03        | -1.25     | 1.13        | -1.85      | -1.22        | 1.04       | 1.04         | 1.33       | 1.52         |
| FUT5 /// NDU | fucosyltransferase 5 (alpha   | chr19p13.3           | carbohydrate metabolic process            | ---                                       | -1.04         | -1.07           | -1.09     | -1.06       | 1.03      | 1.03        | 1.02       | 1.03         | 1.02       | -1.06        | -1.55      | -1.49        |
| PUT8         | fucosyltransferase 8 (alpha   | chr14q24.3           | in utero embryonic development            | ---                                       | 1.64          | 1.63            | 1.12      | -1.12       | -1.18     | -1.09       | -1.82      | -1.27        | -2.53      | -2.93        | -1.84      | -3.61        |
| FUZ          | fuzzy planar cell polarity pr | chr19q13.33          | establishment of planar polarity          | ---                                       | -1.42         | -1.34           | 1.01      | 1.21        | -1.22     | -1.11       | -1.04      | 1.10         | -1.66      | -1.90        | -1.98      | -1.98        |
| FXN          | frataxin                      | chr9q21.11           | oxidative phosphorylation                 | ---                                       | -1.18         | -1.15           | -1.14     | -1.24       | 1.03      | 1.21        | 1.07       | 1.25         | -1.61      | -1.90        | -1.98      | -1.45        |
| FXR1         | fragile X mental retardation  | chr3q28              | apoptotic process                         | ---                                       | 1.13          | 1.13            | -1.01     | 1.01        | -1.06     | 1.01        | 1.05       | 1.03         | -1.11      | -1.01        | -1.00      | -1.26        |
| FXR1         | fragile X mental retardation  | chr3q28              | apoptotic process                         | ---                                       | 1.35          | 1.14            | -1.09     | 1.30        | 1.24      | 1.05        | 1.08       | 1.16         | -1.13      | 1.15         | -1.22      | -1.99        |
| FXR1         | fragile X mental retardation  | chr3q28              | apoptotic process                         | ---                                       | -1.07         | 1.04            | 1.00      | 1.02        | -1.01     | -1.04       | 1.11       | 1.11         | 1.07       | 1.06         | 1.14       | 1.17         |
| FXR1         | fragile X mental retardation  | chr3q28              | apoptotic process                         | ---                                       | 1.01          | -1.08           | 1.35      | 1.22        | -1.06     | 1.10        | -1.20      | 1.03         | -1.68      | -1.61        | -1.35      | -1.37        |
| FXR2         | fragile X mental retardation  | chr17p13.1           | 0                                         | ---                                       | 1.15          | 1.13            | 1.27      | 1.36        | 1.12      | 1.05        | 1.25       | 1.09         | 1.99       | 1.75         | 1.52       | 1.51         |
| FXR2         | fragile X mental retardation  | chr17p13.1           | 0                                         | ---                                       | 1.02          | -1.06           | 1.05      | 1.13        | 1.02      | -1.04       | 1.07       | 1.09         | 1.47       | 1.33         | 1.20       | 1.21         |
| FXYD3        | FXYD domain containing        | chr19q13.12          | transport                                 | ---                                       | -1.14         | -1.30           | 1.02      | -1.14       | 1.03      | 1.05        | -1.08      | -1.05        | -1.02      | -1.02        | 1.78       | 1.21         |
| FXYD3        | FXYD domain containing        | chr19q13.12          | transport                                 | ---                                       | -1.10         | 1.11            | -1.23     | 1.09        | 1.22      | -1.10       | 1.07       | 1.20         | -1.23      | 1.05         | 1.11       | 1.41         |
| FXYD4        | FXYD domain containing        | chr10q11.21          | transport                                 | ---                                       | -1.86         | 1.76            | -1.27     | 1.17        | -1.18     | -2.08       | -1.63      | -1.10        | 2.30       | 1.66         | 1.40       | 1.70         |
| FXYD5        | FXYD domain containing        | chr19q13.12          | transport                                 | Ribosomal_Proteins // GenMAPP             | -1.07         | -1.07           | -1.02     | -1.05       | 1.05      | -1.09       | 1.26       | 1.13         | 1.54       | 1.22         | 1.29       | 1.38         |
| FXYD5        | FXYD domain containing        | chr19q13.12          | transport                                 | Ribosomal_Proteins // GenMAPP             | -1.08         | -1.08           | -1.03     | 1.03        | 1.09      | -1.10       | 1.39       | 1.20         | 1.65       | 1.28         | 1.28       | 1.39         |
| FYN          | FYN oncogene related to S     | chr6p21              | neuron migration                          | Integrin-mediated_cell_adhesion_KEGG // C | 1.54          | 1.24            | 1.15      | -1.30       | -1.10     | -1.03       | 1.13       | -1.01        | -1.68      | -2.03        | -2.96      | -3.39        |
| FYTTD1       | forty-two-three domain con    | chr3q29              | mRNA export from nucleus                  | ---                                       | 1.26          | 1.25            | 1.11      | 1.01        | 1.07      | 1.06        | -1.03      | -1.01        | -1.18      | -1.07        | 1.18       | 1.04         |
| FZD1         | frizzled family receptor 1    | chr7q21              | positive regulation of protein phosphoryl | Wnt_signaling // GenMAPP                  | -1.54         | -1.68           | 1.94      | 1.90        | -1.66     | -1.42       | 1.39       | 1.27         | 3.93       | 2.16         | 1.09       | 1.91         |
| FZD1         | frizzled family receptor 1    | chr7q21              | positive regulation of protein phosphoryl | Wnt_signaling // GenMAPP                  | 1.03          | -1.16           | 1.15      | -1.12       | -1.05     | 1.16        | -1.22      | -1.09        | -1.36      | -1.20        | -1.50      | -1.44        |
| FZD10-AS1    | FZD10 antisense RNA 1 (chr    | chr12q24.33          | 0                                         | ---                                       | 1.02          | 1.00            | 1.31      | 1.27        | 1.63      | -1.03       | 1.27       | 1.26         | 1.28       | 1.24         | -1.50      | -1.33        |
| FZD10-AS1    | FZD10 antisense RNA 1 (chr    | chr12q24.33          | 0                                         | ---                                       | 1.01          | -1.01           | 1.41      | 1.33        | 1.19      | 1.16        | 1.22       | 1.12         | -1.10      | -1.12        | -2.32      | -2.39        |
| FZD2         | frizzled family receptor 2    | chr17q21.2           | vasculature development                   | Wnt_signaling // GenMAPP                  | -1.09         | -1.03           | -1.17     | -1.32       | 1.03      | 1.06        | -1.73      | -1.05        | -3.76      | -3.10        | -3.21      | -3.39        |
| FZD3         | frizzled family receptor 3    | chr8p21              | establishment of planar polarity          | Wnt_signaling // GenMAPP                  | 1.18          | 1.35            | -1.37     | -1.62       | 1.40      | 1.43        | -1.49      | -1.73        | -1.20      | 1.37         | -1.80      | -1.80        |
| FZD3         | frizzled family receptor 3    | chr8p21              | establishment of planar polarity          | Wnt_signaling // GenMAPP                  | 1.50          | 1.20            | 1.31      | 1.48        | -1.28     | -1.18       | 1.07       | -1.25        | -1.06      | -1.27        | -1.81      | -2.13        |
| FZD3         | frizzled family receptor 3    | chr8p21              | establishment of planar polarity          | Wnt_signaling // GenMAPP                  | 1.18          | 1.24            | 1.43      | 1.30        | -1.51     | -1.11       | 1.00       | 1.26         | -1.48      | -1.33        | -2.52      | -2.23        |
| FZD4         | frizzled family receptor 4    | chr11q14.2           | luteinization                             | ---                                       | 1.19          | -1.31           | 3.72      | 2.85        | 4.69      | 1.19        | 2.33       | 1.70         | 1.12       | 1.70         | 3.33       | 3.40         |
| FZD4         | frizzled family receptor 4    | chr11q14.2           | luteinization                             | ---                                       | 1.16          | 1.02            | 1.08      | 1.19        | 1.21      | 1.00        | 1.38       | 1.14         | 1.90       | 1.71         | 2.03       | 1.88         |
| FZD5         | frizzled family receptor 5    | chr2q33.3            | embryonic axis specification              | Wnt_signaling // GenMAPP                  | 1.14          | 1.26            | 1.15      | 1.10        | -1.07     | 1.07        | -1.67      | -1.26        | -1.12      | -1.02        | 1.36       | 1.24         |
| FZD6         | frizzled family receptor 6    | chr8q22.3-q23.1      | angiogenesis                              | Wnt_signaling // GenMAPP                  | 2.07          | 1.95            | -1.13     | -1.04       | -1.35     | 1.13        | 1.01       | -2.32        | -1.82      | -1.93        | -5.02      | -5.02        |
| FZD7         | frizzled family receptor 7    | chr2q33              | vasculature development                   | Wnt_signaling // GenMAPP                  | -1.11         | -1.19           | 1.05      | -1.31       | -1.13     | -1.35       | -1.11      | -1.26        | 1.07       | 1.03         | 1.63       | 1.26         |
| FZD8         | frizzled family receptor 8    | chr10p11.21          | negative regulation of transcription from | Wnt_signaling // GenMAPP                  | -1.23         | -1.21           | -1.10     | -1.05       | -1.01     | 1.17        | 1.30       | 1.26         | 1.09       | 1.44         | 1.52       | 1.95         |
| FZD8         | frizzled family receptor 8    | chr10p11.21          | negative regulation of transcription from | Wnt_signaling // GenMAPP                  | 1.01          | 1.00            | 1.10      | 1.14        | 1.03      | -1.06       | 1.21       | 1.19         | 1.23       | 1.45         | 1.53       | 1.78         |
| FZR1         | fizzy/cell division cycle 20  | chr19p13.3           | S phase of mitotic cell cycle             | ---                                       | 1.06          | -1.15           | 1.06      | 1.08        | -1.01     | 1.06        | -1.28      | -1.10        | -1.77      | -1.60        | -1.63      | -1.57        |
| FZR1         | fizzy/cell division cycle 20  | chr19p13.3           | S phase of mitotic cell cycle             | ---                                       | -1.02         | -1.05           | -1.03     | 1.01        | -1.23     | 1.29        | 1.43       | 2.81         | 2.32       | 1.68         | 1.76       | 1.76         |
| G0S2         | G0/G1switch 2                 | chr1q32.2            | apoptotic process                         | Circadian_Exercise // GenMAPP             | 1.12          | 1.04            | -1.12     | -1.01       | -1.01     | -1.02       | 1.08       | 1.06         | 2.21       | 1.49         | 1.96       | 1.48         |
| G2E3         | G2/M-phase specific E3 ub     | chr14q12             | protein polyubiquitination                | ---                                       | 1.10          | -1.06           | 1.33      | 1.03        | -1.10     | 1.15        | -1.13      | -1.12        | 1.05       | 1.09         | 1.37       | 1.14         |
| G2E3         | G2/M-phase specific E3 ub     | chr14q12             | protein polyubiquitination                | ---                                       | 1.25          | 1.17            | 1.29      | 1.08        | 1.12      | 1.27        | 1.03       | 1.06         | 1.11       | 1.17         | 1.65       | 1.47         |
| G2E3         | G2/M-phase specific E3 ub     | chr14q12             | protein polyubiquitination                | ---                                       | -1.15         | -1.08           | 1.08      | -1.09       | 1.01      | -1.07       | -1.08      | -1.00        | 1.28       | 1.22         | 1.34       | 1.27         |
| G3BP1        | GTPase activating protein (c  | chr5q33.1            | transport                                 | ---                                       | 1.14          | 1.11            | 1.05      | 1.02        | -1.16     | -1.13       | -1.08      | 1.02         | -1.03      | -1.18        | -1.10      | -1.23        |
| G3BP1        | GTPase activating protein (c  | chr5q33.1            | transport                                 | ---                                       | 1.04          | -1.05           | 1.07      | 1.12        | -1.06     | 1.07        | -1.26      | -1.09        | 1.24       | 1.30         | 1.13       | 1.18         |
| G3BP1        | GTPase activating protein (c  | chr5q33.1            | transport                                 | ---                                       | 1.60          | 1.83            | 1.03      | 1.19        | 1.16      | 1.07        | -1.04      | -1.21        | -1.12      | -1.64        | -1.56      | -1.58        |
| G6PC         | glucose-6-phosphatase, cat    | chr17q21             | carbohydrate metabolic process            | Glycolysis_and_Gluconeogenesis // GenMA   | -1.09         | -1.58           | -1.05     | 1.17        | -2.49     | -1.18       | -1.06      | -1.15        | 4.06       | 5.81         | -1.65      | 1.13         |
| G6PC3        | glucose 6 phosphatase, cat    | chr17q21.31          | carbohydrate metabolic process            | ---                                       | -1.01         | -1.04           | -1.04     | -1.00       | -1.00     | -1.01       | 1.07       | 1.02         | -1.08      | 1.08         | -1.30      | -1.12        |
| G6PC3        | glucose 6 phosphatase, cat    | chr17q21.31          | carbohydrate metabolic process            | ---                                       | -1.07         | -1.04           | 1.01      | 1.05        | 1.28      | 1.13        | 1.16       | -1.00        | 1.10       | 1.16         | -1.10      | -1.12        |
| G6PD         | glucose-6-phosphate dehyd     | chrXq28              | cytokine production                       | Pentose_Phosphate_Pathway // GenMAPP      | -1.03         | -1.13           | -1.12     | 1.04        | 1.09      | 1.06        | -1.06      | 1.08         | -1.03      | 1.19         | -1.35      | -1.15        |
| GAB1         | GRB2-associated binding p     | chr4q31.21           | activation of MAPK activity               | ---                                       | 1.67          | 1.01            | 1.31      | -1.18       | -1.68     | -1.65       | -1.25      | -1.35        | -1.10      | 1.04         | -1.40      | -1.35        |
| GAB1         | GRB2-associated binding p     | chr4q31.21           | activation of MAPK activity               | ---                                       | 1.14          | 1.39            | -1.14     | -1.20       | 1.32      | 1.93        | -1.45      | 1.02         | -2.61      | -1.90        | -1.55      | -3.17        |
| GAB2         | GRB2-associated binding p     | chr11q14.1           | transmembrane receptor protein tyrosine   | ---                                       | 1.08          | 1.52            | 1.21      | -1.01       | -1.10     | -1.14       | 1.28       | 2.04         | 1.23       | -1.23        | 1.51       | 1.18         |

| ID          | Gene Title                    | Chromosomal Location | 1st Gene Ontology Biological Process      | Pathway                                 | A2497 30 mins | A2497P' 30 mins | A2497 2 h | A2497P' 2 h | A2497 4 h | A2497P' 4 h | A2497 24 h | A2497P' 24 h | A2497 48 h | A2497P' 48 h | A2497 72 h | A2497P' 72 h |
|-------------|-------------------------------|----------------------|-------------------------------------------|-----------------------------------------|---------------|-----------------|-----------|-------------|-----------|-------------|------------|--------------|------------|--------------|------------|--------------|
| GAB4        | GRB2-associated binding       | chr22q11.1           | integrin-mediated signaling pathway       | ---                                     | -2.60         | -1.98           | -3.04     | -1.19       | 1.89      | 2.38        | 1.12       | -1.69        | 1.01       | -1.06        | -1.10      | 2.40         |
| GABARAP     | GABA(A) receptor-associated   | chr17p13.1           | autophagic vacuole assembly               | ---                                     | -1.09         | -1.01           | -1.10     | -1.11       | 1.04      | 1.02        | 1.12       | 1.00         | 1.07       | 1.05         | -1.07      | -1.19        |
| GABARAPL    | GABA(A) receptor-associated   | chr12p13.2           | autophagic vacuole assembly               | ---                                     | 1.23          | 1.05            | -1.16     | 1.05        | -1.27     | -1.14       | 1.30       | 1.26         | 1.43       | 1.33         | 1.46       | 1.24         |
| GABARAPL    | GABA(A) receptor-associated   | chr12p13.2           | autophagic vacuole assembly               | ---                                     | 1.12          | -1.07           | -1.15     | -1.04       | -1.12     | -1.02       | 1.21       | 1.18         | 1.37       | 1.53         | 1.33       | 1.28         |
| GABARAPL    | GABA(A) receptor-associated   | chr12p13.2 /// chr15 | autophagic vacuole assembly               | ---                                     | -1.11         | -1.07           | -1.05     | 1.02        | -1.08     | -1.11       | 1.16       | 1.09         | 1.72       | 1.36         | 1.39       | 1.36         |
| GABARAPL    | GABA(A) receptor-associated   | chr16q22.1           | autophagic vacuole assembly               | ---                                     | 1.02          | 1.07            | 1.22      | 1.09        | 1.03      | 1.04        | -1.02      | 1.01         | -1.01      | 1.09         | 1.04       | -1.24        |
| GABBR1      | gamma-aminobutyric acid       | chr6p21.31           | signal transduction                       | GPCRDB_Class_C_Metabotropic_glutam      | -1.60         | -1.19           | -1.69     | -1.97       | -1.32     | 1.17        | 1.31       | 1.77         | -1.41      | 1.01         | -1.93      | -2.00        |
| GABBR2      | gamma-aminobutyric acid       | chr9q22.1-q22.3      | signal transduction                       | GPCRDB_Class_C_Metabotropic_glutam      | -2.55         | -3.57           | 5.01      | 5.40        | -1.09     | 1.10        | -2.10      | 1.20         | 7.53       | 7.24         | -5.42      | -1.31        |
| GABPA       | GA binding protein transcript | chr21q21.3           | negative regulation of transcription from | Smooth_muscle_contraction // GenMAPP    | -1.48         | -1.51           | 1.50      | 1.12        | 1.01      | 1.16        | 1.02       | 1.06         | -1.51      | -1.74        | 1.23       | -1.11        |
| GABPA       | GA binding protein transcript | chr21q21.3           | negative regulation of transcription from | Smooth_muscle_contraction // GenMAPP    | 1.20          | 1.18            | 1.02      | -1.12       | -1.12     | 1.09        | -1.40      | 1.12         | -1.46      | -1.13        | -1.95      | -2.50        |
| GABPB1      | GA binding protein transcript | chr15q21.2           | transcription, DNA-dependent              | Smooth_muscle_contraction // GenMAPP    | 1.16          | 1.11            | 1.08      | -1.04       | 1.03      | 1.03        | 1.22       | 1.09         | 2.08       | 1.62         | 2.25       | 1.46         |
| GABPB1-AS   | GABPB1 antisense RNA 1        | chr15q21.2           | 0                                         | ---                                     | -1.01         | -1.16           | -1.01     | -1.03       | 1.05      | -1.13       | -1.18      | -1.07        | -1.49      | -1.40        | -1.69      | -1.16        |
| GABPB1-AS   | GABPB1 antisense RNA 1        | chr15q21.2           | 0                                         | ---                                     | 1.36          | 1.52            | -1.03     | 1.14        | 1.02      | 1.29        | 1.64       | 1.57         | -1.33      | -1.96        | -2.07      | -1.86        |
| GABPB2      | GA binding protein transcript | chr1q21.3            | transcription, DNA-dependent              | ---                                     | 1.11          | 1.18            | 1.03      | -1.16       | -1.01     | 1.05        | -1.34      | -1.10        | -2.29      | -1.91        | -1.84      | -2.37        |
| GABRA2      | gamma-aminobutyric acid       | chr4p12              | regulation of neurotransmitter levels     | ---                                     | 1.99          | 1.38            | -2.57     | -1.55       | -1.24     | 1.28        | -2.95      | -1.19        | -1.28      | -2.14        | -1.45      | 1.42         |
| GABRA2      | gamma-aminobutyric acid       | chr4p12              | regulation of neurotransmitter levels     | ---                                     | 1.08          | 2.85            | 1.03      | 1.57        | 1.68      | -7.25       | -1.14      | 1.02         | 3.62       | 4.51         | 9.24       | 11.06        |
| GABRA3      | gamma-aminobutyric acid       | chrXq28              | transport                                 | ---                                     | 1.15          | 1.20            | 1.30      | -2.58       | -1.00     | -1.10       | -1.71      | -1.59        | -1.73      | -1.35        | -1.64      | -2.93        |
| GABRB3      | gamma-aminobutyric acid       | chr15q12             | transport                                 | ---                                     | 3.72          | 1.73            | 2.53      | 2.26        | -1.28     | 1.53        | -5.32      | -1.00        | 10.07      | 13.10        | -3.17      | -1.53        |
| GABRG2      | gamma-aminobutyric acid       | chr5q34              | transport                                 | ---                                     | 1.07          | 1.06            | 1.06      | 1.07        | 1.08      | 1.07        | 1.11       | 1.20         | -1.51      | -1.30        | -3.10      | -2.55        |
| GABRG2      | gamma-aminobutyric acid       | chr5q34              | transport                                 | ---                                     | 1.08          | 1.01            | -1.10     | -1.03       | -1.29     | 1.02        | -1.22      | -1.03        | -2.09      | -1.44        | -2.51      | -2.26        |
| GABRG3      | gamma-aminobutyric acid       | chr15q12             | transport                                 | ---                                     | 1.16          | 1.12            | -1.77     | -4.48       | 1.42      | -1.25       | -1.68      | -3.27        | 3.41       | 4.07         | -3.69      | -1.52        |
| GABRQ       | gamma-aminobutyric acid       | chrXq28              | transport                                 | ---                                     | -1.09         | 1.04            | 1.39      | 1.45        | -1.26     | -1.19       | -1.75      | -1.53        | -1.58      | -1.61        | -1.38      | -1.39        |
| GADI        | glutamate decarboxylase 1     | chr2q31              | cellular amino acid metabolic process     | Biogenic_Amine_Synthesis // GenMAPP     | 1.55          | -1.22           | -1.15     | 1.85        | -1.38     | -1.04       | 1.53       | 1.98         | 14.42      | 16.82        | 4.56       | 7.46         |
| GADI        | glutamate decarboxylase 1     | chr2q31              | cellular amino acid metabolic process     | Biogenic_Amine_Synthesis // GenMAPP     | -1.22         | -1.15           | 1.07      | 1.05        | 1.03      | -1.03       | 2.17       | 1.77         | 3.00       | 2.68         | 2.12       | 2.46         |
| GADI        | glutamate decarboxylase 1     | chr2q31              | glutamate catabolic process               | Biogenic_Amine_Synthesis // GenMAPP     | 1.11          | 1.02            | 1.26      | 1.83        | -1.13     | -1.09       | 2.13       | 1.79         | 2.43       | 2.16         | 2.33       | 2.51         |
| GADD45A     | growth arrest and DNA-damage  | chr1p31.2            | regulation of cyclin-dependent protein se | Cell_cycle_KEGG // GenMAPP /// G1_to_S  | 1.08          | 1.07            | -1.07     | -1.03       | -1.05     | 1.02        | 1.04       | 1.18         | 1.04       | 1.06         | 2.01       | 1.45         |
| GADD45B     | growth arrest and DNA-damage  | chr19p13.3           | activation of MAPKKK activity             | ---                                     | 1.17          | 1.07            | -1.07     | -1.07       | 1.14      | -1.04       | 1.06       | 1.10         | 2.81       | 1.75         | 4.73       | 2.59         |
| GADD45B     | growth arrest and DNA-damage  | chr19p13.3           | activation of MAPKKK activity             | ---                                     | 1.07          | -1.02           | -1.01     | 1.05        | 1.18      | 1.01        | 1.28       | 1.04         | 2.47       | 1.79         | 4.69       | 2.95         |
| GADD45B     | growth arrest and DNA-damage  | chr19p13.3           | activation of MAPKKK activity             | ---                                     | 1.12          | 1.02            | -1.08     | 1.05        | 1.02      | -1.12       | 1.08       | 1.11         | 2.03       | 1.46         | 4.22       | 2.91         |
| GADD45B     | growth arrest and DNA-damage  | chr19p13.3           | activation of MAPKKK activity             | ---                                     | 1.17          | 1.12            | 1.03      | 1.03        | 1.16      | -1.06       | 1.44       | 1.12         | 2.38       | 1.61         | 5.44       | 3.44         |
| GADD45GIP   | growth arrest and DNA-damage  | chr19p13.2           | cell cycle                                | ---                                     | -1.03         | -1.07           | 1.02      | 1.11        | 1.00      | -1.08       | 1.33       | 1.22         | 1.70       | 1.42         | 1.31       | 1.44         |
| GADD45GIP   | growth arrest and DNA-damage  | chr19p13.2           | cell cycle                                | ---                                     | 1.06          | -1.00           | 1.00      | 1.11        | -1.07     | -1.15       | 1.28       | 1.23         | 1.53       | 1.35         | 1.46       | 1.48         |
| GADD45GIP   | growth arrest and DNA-damage  | chr19p13.2           | cell cycle                                | ---                                     | 1.09          | -1.02           | 1.51      | 1.21        | -1.17     | -1.02       | 1.20       | 1.37         | 1.85       | 1.47         | 1.32       | 1.45         |
| GAGE1 /// G | G antigen 1 /// G antigen 12  | chrXp11 /// chrXp1   | cellular defense response                 | ---                                     | 1.03          | -1.19           | -1.02     | 1.08        | 1.15      | -1.31       | 1.02       | -1.60        | 2.37       | 2.01         | -1.38      | -1.47        |
| GAGE1 /// G | G antigen 1 /// G antigen 12  | chrXp11 /// chrXp1   | cellular defense response                 | ---                                     | -1.04         | 1.14            | 1.11      | 1.47        | 1.37      | -1.06       | 1.10       | 1.13         | 1.44       | 1.48         | -1.00      | -1.08        |
| GAGE1 /// G | G antigen 1 /// G antigen 12  | chrXp11.23 /// chrX  | cellular defense response                 | ---                                     | -1.16         | -1.20           | -1.06     | 1.50        | -1.24     | -1.78       | 1.29       | 1.03         | 2.19       | 1.98         | 1.21       | 1.02         |
| GAGE12F /// | G antigen 12F /// G antigen   | chrXp11.23 /// chrX  | cellular defense response                 | ---                                     | 1.31          | 1.13            | -1.25     | 1.13        | 1.83      | 1.44        | -1.02      | 1.03         | 1.74       | 1.60         | -1.25      | -1.35        |
| GAGE3       | G antigen 3                   | chrXp11.4-p11.2      | 0                                         | ---                                     | -1.38         | 1.05            | -2.01     | -1.22       | -1.19     | -1.67       | 1.21       | 1.65         | 1.85       | 1.60         | -1.45      | -1.37        |
| GALC        | galactosylceramidase          | chr14q31             | carbohydrate metabolic process            | ---                                     | 1.18          | -1.05           | 1.22      | 1.59        | -1.33     | -1.26       | 1.48       | 1.04         | 1.34       | 1.01         | 1.04       | 1.73         |
| GALC        | galactosylceramidase          | chr14q31             | carbohydrate metabolic process            | ---                                     | -1.13         | -1.07           | -1.14     | -1.15       | -1.10     | -1.19       | -1.17      | -1.14        | -1.45      | -1.34        | -1.37      | -1.29        |
| GALC        | galactosylceramidase          | chr14q31             | carbohydrate metabolic process            | ---                                     | -1.08         | -1.07           | -1.06     | -1.00       | 1.04      | 1.10        | 1.30       | 1.13         | 1.30       | 1.27         | -1.27      | -1.09        |
| GALK2       | galactokinase 2               | chr15q21.1-q21.2     | carbohydrate metabolic process            | ---                                     | -1.31         | -1.36           | 1.02      | -1.06       | -1.11     | -1.12       | -1.17      | -1.10        | -1.28      | -1.14        | 1.48       | 1.26         |
| GALK2       | galactokinase 2               | chr15q21.1-q21.2     | carbohydrate metabolic process            | ---                                     | -1.02         | 1.02            | -1.02     | -1.16       | -1.04     | -1.13       | 1.07       | -1.04        | 1.17       | 1.17         | 1.37       | 1.27         |
| GALNS       | galactosamine (N-acetyl)-6    | chr16q24.3           | carbohydrate metabolic process            | ---                                     | -1.07         | -1.12           | -1.11     | -1.02       | -1.02     | -1.06       | 1.04       | 1.22         | -1.13      | 1.03         | -1.06      | 1.21         |
| GALNS       | galactosamine (N-acetyl)-6    | chr16q24.3           | carbohydrate metabolic process            | ---                                     | -2.28         | -1.60           | 1.09      | -1.67       | 1.36      | 3.51        | -1.22      | 3.07         | 3.37       | 3.03         | 1.65       | 1.49         |
| GALNT1      | UDP-N-acetyl-alpha-D-gal      | chr18q12.1           | protein glycosylation                     | ---                                     | -1.02         | 1.04            | -1.06     | -1.07       | -1.03     | 1.06        | -1.01      | -1.06        | 1.09       | 1.15         | -1.03      | -1.02        |
| GALNT1      | UDP-N-acetyl-alpha-D-gal      | chr18q12.1           | protein glycosylation                     | ---                                     | 1.03          | 1.05            | -1.04     | -1.02       | -1.04     | 1.02        | 1.08       | 1.04         | -1.03      | -1.34        | -1.56      | -1.56        |
| GALNT10     | UDP-N-acetyl-alpha-D-gal      | chr5q33.2            | protein glycosylation                     | ---                                     | 1.24          | -1.12           | 1.12      | -1.14       | 1.08      | 1.06        | 1.37       | 1.30         | 1.30       | 1.17         | 1.30       | 1.38         |
| GALNT12     | UDP-N-acetyl-alpha-D-gal      | chr9q22.33           | protein glycosylation                     | ---                                     | 1.28          | 1.25            | 1.12      | -1.32       | -1.40     | 1.00        | -1.35      | 1.02         | -1.16      | 1.19         | -1.46      | -1.69        |
| GALNT13     | UDP-N-acetyl-alpha-D-gal      | chr2q24.1            | protein glycosylation                     | ---                                     | -1.20         | 1.04            | -1.18     | -1.23       | 1.23      | -1.05       | -1.29      | -1.02        | -1.46      | 1.02         | -1.92      | -1.82        |
| GALNT13     | UDP-N-acetyl-alpha-D-gal      | chr2q24.1            | protein glycosylation                     | ---                                     | -1.12         | 1.23            | 1.22      | 1.19        | 1.02      | -1.18       | 1.79       | 1.97         | -1.35      | 1.06         | -2.30      | -3.00        |
| GALNT18     | UDP-N-acetyl-alpha-D-gal      | chr11p15.3           | protein glycosylation                     | ---                                     | 1.33          | 1.22            | -1.04     | -1.06       | -1.07     | -1.04       | -1.03      | 1.32         | 1.81       | 1.73         | 1.26       | 2.07         |
| GALNT2      | UDP-N-acetyl-alpha-D-gal      | chr1q41-q42          | immunoglobulin biosynthetic process       | ---                                     | -1.11         | -1.17           | -1.24     | -1.23       | 1.13      | 1.35        | 1.38       | 1.12         | 1.29       | 1.07         | -1.53      | -1.55        |
| GALNT2      | UDP-N-acetyl-alpha-D-gal      | chr1q41-q42          | immunoglobulin biosynthetic process       | ---                                     | -1.02         | -1.06           | 1.11      | 1.10        | 1.04      | -1.00       | 1.18       | 1.05         | 1.31       | 1.30         | 1.66       | 1.62         |
| GALNT2      | UDP-N-acetyl-alpha-D-gal      | chr1q41-q42          | immunoglobulin biosynthetic process       | ---                                     | 1.03          | -1.01           | 1.04      | 1.04        | 1.05      | -1.02       | 1.14       | 1.09         | 1.46       | 1.30         | 1.39       | 1.39         |
| GALNT5      | UDP-N-acetyl-alpha-D-gal      | chr2q24.1            | glycosaminoglycan biosynthetic process    | ---                                     | 1.32          | 3.15            | -1.62     | -1.28       | 2.31      | 1.98        | -1.04      | -1.29        | -1.95      | -1.12        | -1.14      | -1.61        |
| GALNT6      | UDP-N-acetyl-alpha-D-gal      | chr12q13             | protein glycosylation                     | ---                                     | 1.19          | 1.02            | 2.66      | 2.44        | 1.05      | -1.28       | -1.20      | -1.19        | -1.46      | -1.26        | 1.90       | 2.02         |
| GALNT7      | UDP-N-acetyl-alpha-D-gal      | chr4q31.1            | carbohydrate metabolic process            | ---                                     | -1.03         | -1.26           | 1.13      | 1.04        | 1.27      | 1.56        | -1.50      | -1.19        | -2.46      | -1.83        | -2.33      | -2.44        |
| GALNT7      | UDP-N-acetyl-alpha-D-gal      | chr4q31.1            | carbohydrate metabolic process            | ---                                     | 1.10          | 1.04            | 1.01      | -1.04       | -1.03     | 1.03        | -1.09      | 1.04         | -1.67      | -1.36        | -2.06      | -2.17        |
| GALT        | galactose-1-phosphate urid    | chr9p13              | carbohydrate metabolic process            | GPCRDB_Class_A_Rhodopsin-like // GenM   | -1.01         | -1.06           | 1.04      | 1.07        | 1.00      | -1.13       | 1.21       | 1.06         | -1.02      | -1.17        | -1.32      | -1.15        |
| GAMT        | guanidinoacetate N-methyl     | chr19p13.3           | creatine metabolic process                | ---                                     | -1.13         | -1.29           | -1.23     | -1.19       | 1.01      | -1.25       | -1.07      | 1.22         | -1.55      | -1.19        | -2.39      | -1.50        |
| GAMT        | guanidinoacetate N-methyl     | chr19p13.3           | creatine metabolic process                | ---                                     | 5.49          | 3.49            | 2.28      | 2.07        | 1.41      | 1.58        | -1.77      | -2.17        | 1.46       | 1.01         | -3.28      | -2.73        |
| GAMT        | guanidinoacetate N-methyl     | chr19p13.3           | creatine metabolic process                | ---                                     | -1.04         | 1.05            | -1.01     | 1.14        | -1.60     | -1.34       | -1.09      | -1.12        | 1.16       | -1.10        | -1.95      | -1.76        |
| GANC        | glucosidase, alpha; neutral   | chr15q15.2           | carbohydrate metabolic process            | ---                                     | -1.01         | -1.01           | -1.08     | -1.02       | 1.05      | -1.00       | 1.03       | -1.69        | -1.46      | -1.99        | -1.79      | -1.79        |
| GANC        | glucosidase, alpha; neutral   | chr15q15.2           | carbohydrate metabolic process            | ---                                     | -1.04         | -1.16           | -1.03     | -1.25       | -1.00     | -1.19       | 1.14       | 1.01         | 1.14       | -1.12        | -1.09      | -1.30        |
| GAPDH       | glyceraldehyde-3-phosphat     | chr12p13             | microtubule cytoskeleton organization     | Glycolysis_and_Gluconeogenesis // GenMA | -1.11         | -1.01           | -1.06     | -1.02       | 1.01      | -1.08       | 1.21       | 1.09         | 1.66       | 1.20         | 1.17       | 1.22         |

| ID          | Gene Title                    | Chromosomal Location | 1st Gene Ontology Biological Process      | Pathway                                 | A2497 30 mins | A2497P' 30 mins | A2497 2 h | A2497P' 2 h | A2497 4 h | A2497P' 4 h | A2497 24 h | A2497P' 24 h | A2497 48 h | A2497P' 48 h | A2497 72 h | A2497P' 72 h |
|-------------|-------------------------------|----------------------|-------------------------------------------|-----------------------------------------|---------------|-----------------|-----------|-------------|-----------|-------------|------------|--------------|------------|--------------|------------|--------------|
| GAPDH       | glyceraldehyde-3-phosphate    | chr12p13             | microtubule cytoskeleton organization     | Glycolysis_and_Gluconeogenesis // GenMA | -1.11         | -1.01           | -1.03     | 1.00        | 1.03      | -1.06       | 1.21       | 1.07         | 1.57       | 1.15         | 1.17       | 1.21         |
| GAPDH       | glyceraldehyde-3-phosphate    | chr12p13             | microtubule cytoskeleton organization     | Glycolysis_and_Gluconeogenesis // GenMA | -1.11         | -1.05           | -1.06     | -1.02       | -1.01     | -1.11       | 1.20       | 1.06         | 1.54       | 1.13         | 1.16       | 1.21         |
| GAPDH73     | glyceraldehyde-3-phosphate    | ---                  | ---                                       | ---                                     | 1.08          | -1.24           | 1.11      | 1.32        | -1.42     | 1.12        | -1.10      | -1.07        | 1.45       | 1.20         | -1.16      | -1.23        |
| GAR1        | GAR1 ribonucleoprotein h      | chr4q25              | pseudouridine synthesis                   | ---                                     | -1.08         | -1.04           | 1.02      | -1.11       | -1.04     | -1.05       | -1.06      | 1.05         | 1.03       | -1.09        | 1.18       | 1.15         |
| GAREM       | GRB2 associated, regulator    | chr18q12.1           | epidermal growth factor receptor signalin | ---                                     | -1.18         | -1.13           | 1.27      | 1.18        | 1.33      | 1.10        | -1.20      | -1.11        | -1.06      | -1.01        | 1.43       | 1.19         |
| GAREM       | GRB2 associated, regulator    | chr18q12.1           | epidermal growth factor receptor signalin | ---                                     | 1.09          | -1.07           | 1.00      | 1.07        | 1.31      | 1.16        | -1.02      | -1.02        | 1.18       | -1.16        | 1.04       | 1.15         |
| GART        | phosphoribosylglycinamide     | chr21q22.11          | purine nucleobase metabolic process       | ---                                     | -1.21         | -1.12           | -1.08     | -1.21       | -1.15     | -1.11       | -1.23      | 1.11         | -1.06      | -1.07        | 1.98       | 2.41         |
| GART        | phosphoribosylglycinamide     | chr21q22.11          | purine nucleobase metabolic process       | ---                                     | -1.00         | -1.01           | 1.06      | 1.03        | 1.02      | 1.03        | 1.01       | -1.13        | -1.13      | -1.12        | 1.24       | 1.12         |
| GART        | phosphoribosylglycinamide     | chr21q22.11          | purine nucleobase metabolic process       | ---                                     | -1.10         | -1.05           | -1.02     | -1.01       | 1.04      | 1.02        | 1.02       | 1.06         | -1.03      | -1.05        | 1.08       | 1.06         |
| GAS1        | growth arrest-specific 1      | chr9q21.3-q22        | positive regulation of mesenchymal cell   | ---                                     | 1.14          | 1.10            | 1.01      | -1.12       | -1.21     | -1.03       | -1.38      | -1.15        | -2.06      | -1.79        | -1.77      | -2.36        |
| GAS2L3      | growth arrest-specific 2 like | chr12q23.1           | microtubule cytoskeleton organization     | ---                                     | -1.01         | -1.05           | 1.04      | 1.00        | -1.24     | 1.16        | -1.63      | -1.27        | 1.06       | 1.21         | -1.06      | -1.17        |
| GAS5 // SNC | growth arrest-specific 5 (no  | chr1q25.1            | 0                                         | ---                                     | 1.04          | -1.03           | 1.05      | 1.15        | 1.08      | 1.13        | -1.16      | 1.02         | -1.29      | -1.11        | -1.58      | -1.40        |
| GAS5 // SNC | growth arrest-specific 5 (no  | chr1q25.1            | 0                                         | ---                                     | 1.07          | -1.06           | 1.11      | 1.31        | 1.09      | 1.26        | 1.02       | 1.08         | -1.22      | -1.33        | -1.48      | -1.48        |
| GAS6-AS1    | GAS6 antisense RNA 1          | chr13q34             | 0                                         | ---                                     | -2.10         | -1.35           | 1.01      | 1.29        | 1.19      | 1.16        | 1.61       | 1.50         | 1.23       | 1.61         | -3.11      | -2.48        |
| GAS6-AS1    | GAS6 antisense RNA 1          | chr13q34             | 0                                         | ---                                     | 1.44          | 1.54            | 1.02      | 1.33        | 1.15      | 1.27        | -1.02      | 1.03         | -2.38      | -2.17        | -2.25      | -2.12        |
| GAS7        | growth arrest-specific 7      | chr17p13.1           | regulation of transcription, DNA-depend   | ---                                     | 1.01          | -1.03           | -1.14     | 1.19        | 2.97      | 1.74        | -1.28      | -1.14        | -2.09      | -5.09        | -15.11     | -7.73        |
| GAS7        | growth arrest-specific 7      | chr17p13.1           | regulation of transcription, DNA-depend   | ---                                     | -1.31         | -1.30           | 1.34      | 1.33        | 1.14      | -1.05       | -1.00      | -1.28        | -3.21      | -4.15        | -9.03      | -4.54        |
| GAS7        | growth arrest-specific 7      | chr17p13.1           | regulation of transcription, DNA-depend   | ---                                     | -1.29         | -1.15           | -1.15     | -1.23       | -1.24     | 1.10        | -2.75      | -2.09        | -1.60      | -1.36        | -1.68      | -2.87        |
| GAS7        | growth arrest-specific 7      | chr17p13.1           | regulation of transcription, DNA-depend   | ---                                     | -1.13         | -1.00           | -1.13     | -1.21       | 1.20      | 1.05        | -1.48      | -1.57        | 1.08       | -1.40        | -2.22      | -1.17        |
| GAS8        | growth arrest-specific 8      | chr16q24.3           | negative regulation of cell proliferation | ---                                     | -1.10         | -1.04           | 1.10      | 1.19        | 1.21      | 1.14        | 1.20       | 1.23         | -1.27      | -1.34        | -1.61      | -1.54        |
| GATA2       | GATA binding protein 2        | chr3q21.3            | negative regulation of transcription from | ---                                     | 1.02          | 1.04            | 1.11      | 1.10        | -1.07     | -1.09       | 1.21       | 1.21         | 2.48       | 1.89         | 1.81       | 1.42         |
| GATA3       | GATA binding protein 3        | chr10p15             | negative regulation of transcription from | ---                                     | -1.40         | -1.44           | -1.38     | 1.12        | 2.27      | 1.66        | -2.17      | -2.18        | 1.34       | -2.85        | -1.56      | -7.04        |
| GATA4       | GATA binding protein 4        | chr8p23.1-p22        | in utero embryonic development            | ---                                     | 1.17          | 2.20            | -1.04     | 1.28        | 1.52      | 1.87        | -2.90      | -3.51        | 4.11       | 1.62         | 2.72       | 1.27         |
| GATA5       | GATA binding protein 5        | chr20q13.33          | transcription, DNA-dependent              | ---                                     | -4.98         | -3.21           | -1.16     | -1.37       | -1.65     | 4.30        | 1.52       | 2.35         | -3.48      | -1.27        | -1.90      | -1.06        |
| GATA6       | GATA binding protein 6        | chr18q11.1-q11.2     | negative regulation of transcription from | ---                                     | 1.02          | -1.03           | 1.02      | 1.08        | -1.05     | 1.04        | 1.09       | 1.04         | 1.19       | 1.17         | 1.45       | 1.26         |
| GATAD1      | GATA zinc finger domain       | chr7q21-q22          | regulation of transcription, DNA-depend   | ---                                     | -1.13         | -1.09           | 1.06      | 1.04        | 1.11      | 1.10        | -1.06      | -1.03        | -1.17      | -1.20        | -1.17      | -1.15        |
| GATAD2A     | GATA zinc finger domain       | chr19p13.11          | blood vessel development                  | ---                                     | 1.04          | -1.04           | -1.01     | 1.06        | -1.03     | -1.04       | -1.28      | -1.06        | -1.47      | -1.38        | -1.51      | -1.27        |
| GATAD2B     | GATA zinc finger domain       | chr1q21.3            | transcription, DNA-dependent              | ---                                     | 1.21          | 1.12            | 1.24      | -1.03       | 1.11      | 1.03        | -1.75      | -1.33        | 1.04       | -1.11        | -1.40      | -1.54        |
| GATC // SRS | glutamyl-tRNA(Gln) amid       | chr12q24.31          | mRNA splicing, via spliceosome            | mRNA_processing_Reactome // GenMAPP     | 1.01          | -1.03           | -1.03     | 1.02        | -1.06     | -1.04       | -1.12      | -1.10        | 1.02       | 1.07         | 1.02       | 1.03         |
| GATM        | glycine amidinotransferase    | chr15q21.1           | creatine metabolic process                | ---                                     | 1.97          | 1.55            | -1.09     | -1.19       | -1.06     | -1.14       | -1.50      | 1.06         | 1.37       | 1.24         | 1.40       | -1.08        |
| GATS        | GATS, stromal antigen 3       | chr7q22.1            | 0                                         | ---                                     | -1.26         | 1.14            | 1.02      | -1.04       | 1.04      | 1.03        | -1.42      | -1.12        | -2.45      | -2.02        | -2.00      | -1.49        |
| GATSL3      | GATS protein-like 3           | chr22q12             | regulation of Rab GTPase activity         | ---                                     | 1.25          | 1.17            | 1.25      | 1.38        | 1.01      | 1.07        | -1.23      | -1.58        | -1.31      | 1.41         | -2.53      | -1.44        |
| GBA // GBA  | glucosidase, beta, acid //    | chr1q21              | carbohydrate metabolic process            | ---                                     | -1.05         | -1.23           | 1.09      | 1.05        | -1.08     | -1.10       | 1.20       | 1.21         | -1.05      | 1.03         | -1.55      | -1.26        |
| GBA2        | glucosidase, beta (bile acid  | chr9p13.3            | lipid metabolic process                   | G1_to_S_cell_cycle_Reactome // GenMAPP  | -1.06         | -1.18           | -1.04     | 1.00        | -1.13     | -1.17       | 1.36       | 1.07         | 1.25       | 1.05         | 1.58       | 1.94         |
| GBAP1       | glucosidase, beta, acid pseud | chr1q21              | carbohydrate metabolic process            | ---                                     | 1.03          | 1.05            | 1.07      | 1.17        | -1.05     | -1.05       | 1.07       | 1.09         | -1.04      | -1.04        | -1.72      | -1.65        |
| GBF1        | golgi brefeldin A resistant   | chr10q24             | retrograde vesicle-mediated transport, Ge | ---                                     | -1.14         | -1.21           | -1.01     | 1.10        | 1.17      | 1.06        | -1.05      | -1.11        | 1.24       | 1.27         | 1.18       | 1.50         |
| GBP1        | guanylate binding protein 1   | chr1p22.2            | GTP catabolic process                     | ---                                     | 1.04          | 1.04            | 1.09      | 1.10        | 1.34      | 1.13        | 1.42       | 1.48         | 1.31       | -1.17        | 1.36       | 1.20         |
| GBP1        | guanylate binding protein 1   | chr1p22.2            | GTP catabolic process                     | ---                                     | -1.01         | -1.01           | 1.17      | 1.18        | 1.31      | 1.20        | 1.40       | 1.39         | 1.50       | 1.09         | 1.46       | 1.12         |
| GBP2        | guanylate binding protein 2   | chr1p22.2            | GTP catabolic process                     | ---                                     | 1.14          | 1.25            | 1.00      | -1.10       | -1.10     | 1.07        | -2.02      | -1.39        | -4.44      | -3.56        | -2.75      | -2.25        |
| GBP3        | guanylate binding protein 3   | chr1p22.2            | GTP catabolic process                     | ---                                     | 1.00          | -1.01           | 1.10      | 1.11        | -1.12     | -1.08       | 1.12       | 1.09         | 1.90       | 1.57         | 1.60       | 1.56         |
| GBP4        | guanylate binding protein 4   | chr1p22.2            | GTP catabolic process                     | ---                                     | 2.94          | 4.13            | 1.71      | -1.28       | -1.59     | 2.85        | 3.74       | 4.67         | 1.25       | 1.08         | -2.28      | -1.30        |
| GBP5        | guanylate binding protein 5   | chr1p22.2            | GTP catabolic process                     | ---                                     | -1.05         | 1.06            | -1.16     | -1.31       | -1.28     | -1.17       | -1.12      | -1.08        | -1.99      | -1.56        | -1.69      | -1.98        |
| GBP6        | guanylate binding protein 6   | chr1p22.2            | GTP catabolic process                     | ---                                     | 2.18          | 2.36            | -1.21     | -1.77       | -9.54     | -1.88       | -2.88      | -1.05        | 2.14       | 1.72         | 1.23       | 2.21         |
| GBP6        | guanylate binding protein 6   | chr1p22.2            | GTP catabolic process                     | ---                                     | -8.53         | 2.33            | -2.49     | -2.03       | -1.48     | 1.33        | -1.35      | -1.38        | 2.95       | 2.70         | 1.37       | 1.33         |
| GBX2        | gastrulation brain homeobo    | chr2q37.2            | patterning of blood vessels               | ---                                     | 2.19          | 3.83            | -1.91     | -1.52       | 1.17      | 2.73        | 1.31       | 1.61         | 4.53       | 1.02         | 2.06       | -1.20        |
| GCA1        | glycine C-acetyltransferase   | chr22q13.1           | cellular amino acid metabolic process     | ---                                     | -1.15         | -1.17           | 1.11      | 1.12        | -1.15     | -1.05       | 1.32       | 1.31         | 1.70       | 1.44         | 1.34       | 1.57         |
| GCC1        | GRIP and coiled-coil doma     | chr7q32.1            | protein targeting to Golgi                | ---                                     | -1.14         | -1.01           | 1.11      | 1.08        | 1.19      | 1.07        | -1.03      | -1.10        | 1.02       | -1.05        | 1.44       | 1.37         |
| GCDH        | glutaryl-CoA dehydrogenas     | chr19p13.2           | lysine catabolic process                  | ---                                     | -1.12         | -1.09           | 1.03      | 1.03        | 1.10      | -1.04       | 1.29       | 1.11         | 1.13       | 1.05         | -1.43      | -1.42        |
| GCDH        | glutaryl-CoA dehydrogenas     | chr19p13.2           | lysine catabolic process                  | ---                                     | -1.04         | -1.07           | -1.00     | 1.07        | -1.05     | -1.07       | 1.20       | 1.09         | 1.14       | 1.23         | -1.56      | -1.35        |
| GCFC2       | GC-rich sequence DNA-bin      | chr2p12              | transcription, DNA-dependent              | ---                                     | 1.08          | 1.07            | 1.04      | 1.06        | -1.35     | -1.06       | -1.21      | -1.06        | 1.25       | 1.45         | -1.15      | -1.34        |
| GCFC2       | GC-rich sequence DNA-bin      | chr2p12              | transcription, DNA-dependent              | ---                                     | 1.03          | 1.10            | 1.09      | -1.03       | 1.12      | 1.17        | 1.04       | 1.32         | -1.74      | -1.20        | -2.24      | -1.76        |
| GCHI        | GTP cyclohydrolase 1          | chr14q22.1-q22.2     | GTP catabolic process                     | ---                                     | 1.11          | 1.12            | 1.04      | -1.22       | -1.06     | 1.04        | -1.12      | -1.02        | 1.43       | 1.16         | 1.37       | -1.03        |
| GCHFR       | GTP cyclohydrolase I feed     | chr15q15             | protein complex assembly                  | ---                                     | -1.16         | -1.28           | -1.06     | 1.09        | 1.23      | 1.06        | 1.08       | 1.00         | -1.01      | 1.15         | -1.48      | -1.32        |
| GCLC        | glutamate-cysteine ligase,    | chr6p12              | sulfur amino acid metabolic process       | ---                                     | 1.15          | 1.10            | -1.04     | -1.01       | -1.08     | 1.13        | -1.12      | -1.00        | 1.03       | 1.23         | 1.12       | -1.05        |
| GCLM        | glutamate-cysteine ligase,    | chr1p22.1            | sulfur amino acid metabolic process       | ---                                     | 1.10          | 1.16            | -1.02     | -1.08       | -1.18     | -1.07       | -1.24      | 1.02         | -1.02      | 1.05         | 1.22       | 1.21         |
| GCLM        | glutamate-cysteine ligase,    | chr1p22.1            | sulfur amino acid metabolic process       | ---                                     | 1.41          | 1.30            | 1.02      | -1.12       | -1.16     | -1.02       | -1.35      | -1.27        | -1.20      | 1.06         | 1.09       | 1.10         |
| GCN1L1      | GCN1 general control of ar    | chr12q24.2           | translation                               | ---                                     | -1.01         | -1.04           | 1.04      | 1.09        | 1.19      | 1.07        | -1.03      | -1.20        | 1.00       | 1.04         | 1.16       | 1.33         |
| GCN1L1      | GCN1 general control of ar    | chr12q24.2           | translation                               | ---                                     | -1.08         | -1.03           | -1.01     | 1.03        | 1.01      | -1.05       | 1.05       | 1.08         | 1.15       | 1.11         | 1.11       | 1.19         |
| GCNT1       | glucosaminyl (N-acetyl) tra   | chr9q13              | protein glycosylation                     | ---                                     | 1.09          | -1.04           | 1.31      | 1.10        | 1.14      | -1.04       | 1.21       | -1.29        | 1.36       | 1.44         | 1.17       | 1.13         |
| GCNT2       | glucosaminyl (N-acetyl) tra   | chr6p24.2            | glycosaminoglycan biosynthetic process    | ---                                     | -1.01         | -1.08           | 1.11      | 1.05        | 1.12      | 1.12        | -1.19      | -1.02        | 1.56       | 1.67         | 1.75       | 1.80         |
| GCNT7       | glucosaminyl (N-acetyl) tra   | chr20q13.2           | protein glycosylation                     | ---                                     | 3.51          | 5.04            | -1.10     | 1.49        | -3.39     | -4.58       | 2.67       | -1.32        | -2.03      | -2.62        | -1.93      | 2.09         |
| GCOM1 // M  | GRINLIA complex locus 1       | chr15q21.3           | intracellular signal transduction         | ---                                     | 1.23          | -1.10           | -1.60     | -1.34       | 1.06      | 1.18        | 1.06       | -1.29        | 1.58       | 1.63         | 1.21       | -1.10        |
| GCOM1 // M  | GRINLIA complex locus 1       | chr15q21.3           | RNA biosynthetic process                  | ---                                     | -1.06         | -1.06           | 1.06      | -1.14       | 1.16      | -1.13       | 1.23       | 1.18         | 1.51       | 1.44         | 1.85       | 1.76         |
| GCOM1 // M  | GRINLIA complex locus 1       | chr15q21.3           | RNA biosynthetic process                  | ---                                     | 1.16          | 1.11            | 1.06      | -1.06       | 1.07      | 1.03        | -1.03      | -1.07        | -1.61      | -1.43        | -1.18      | -1.60        |
| GCOM1 // M  | GRINLIA complex locus 1       | chr15q21.3           | RNA biosynthetic process                  | ---                                     | -1.02         | -1.04           | 1.03      | -1.03       | -1.15     | 1.08        | -1.23      | -1.10        | -1.49      | -1.21        | -1.34      | -1.49        |
| GCSAML      | germinal center-associated,   | chr1q44              | 0                                         | ---                                     | -1.18         | -1.14           | 1.01      | -2.14       | -2.89     | -1.27       | -2.07      | -3.00        | -2.68      | -3.65        | -1.44      | -1.28        |

| ID          | Gene Title                     | Chromosomal Location | 1st Gene Ontology Biological Process       | Pathway                               | A2497 30 mins | A2497P' 30 mins | A2497 2 h | A2497P' 2 h | A2497 4 h | A2497P' 4 h | A2497 24 h | A2497P' 24 h | A2497 48 h | A2497P' 48 h | A2497 72 h | A2497P' 72 h |
|-------------|--------------------------------|----------------------|--------------------------------------------|---------------------------------------|---------------|-----------------|-----------|-------------|-----------|-------------|------------|--------------|------------|--------------|------------|--------------|
| GCSH // LO  | glycine cleavage system pr     | chr16q23.2           | glycine catabolic process                  | ---                                   | -1.03         | -1.02           | -1.03     | 1.00        | 1.06      | -1.04       | -1.19      | 1.00         | -1.22      | -1.12        | -1.33      | -1.43        |
| GDA         | guanine deaminase              | chr9q21.13           | nucleobase-containing compound metab       | ---                                   | -1.04         | 1.04            | -1.06     | 1.01        | 1.06      | 1.03        | -1.07      | -1.05        | 1.17       | -1.00        | 1.19       | -1.01        |
| GDA         | guanine deaminase              | chr9q21.13           | nucleobase-containing compound metab       | ---                                   | 1.07          | 1.12            | -1.03     | 1.08        | -1.03     | -1.05       | 1.23       | 1.38         | 1.59       | -1.22        | 2.15       | 1.61         |
| GDAPI       | ganglioside induced differe    | chr8q21.11           | mitochondrial fission                      | ---                                   | 1.04          | 1.06            | -1.02     | -1.04       | -1.07     | -1.04       | -1.00      | -1.04        | -3.06      | -2.38        | -6.55      | -10.54       |
| GDAPI       | ganglioside induced differe    | chr8q21.11           | mitochondrial fission                      | ---                                   | 1.21          | 1.07            | 1.02      | 1.10        | 1.11      | 1.10        | -1.08      | 1.07         | -2.74      | -2.62        | -5.63      | -7.46        |
| GDAPI       | ganglioside induced differe    | chr1p12              | response to retinoic acid                  | ---                                   | 1.12          | 1.17            | 1.24      | -1.03       | -1.20     | -1.02       | 1.18       | -1.03        | 1.21       | 1.26         | 1.96       | 1.33         |
| GDAPI       | ganglioside induced differe    | chr1p12              | response to retinoic acid                  | ---                                   | 1.02          | -1.05           | 1.11      | 1.06        | 1.08      | 1.08        | -1.10      | 1.01         | -1.03      | 1.01         | -1.04      | 1.11         |
| GDF15       | growth differentiation facto   | chr19p13.11          | signal transduction                        | ---                                   | 1.21          | 1.05            | 1.06      | 1.15        | 1.12      | 1.04        | 2.81       | 1.48         | 2.95       | 2.23         | 2.23       | 2.14         |
| GDF15       | growth differentiation facto   | chr19p13.11          | signal transduction                        | ---                                   | 1.30          | 1.29            | 1.11      | 1.28        | 1.37      | 1.35        | 2.75       | 1.43         | 5.41       | 3.71         | 2.25       | 2.19         |
| GDF15       | growth differentiation facto   | chr19p13.11          | signal transduction                        | ---                                   | 1.11          | 1.36            | -1.04     | -1.01       | 1.18      | 1.07        | 2.51       | 1.25         | 3.22       | 2.67         | 3.95       | 3.02         |
| GDI1        | GDP dissociation inhibitor     | chrXq28              | signal transduction                        | ---                                   | 1.10          | 1.00            | 1.11      | 1.25        | 1.08      | 1.06        | 1.15       | 1.12         | 1.37       | 1.21         | 1.39       | 1.36         |
| GDI2        | GDP dissociation inhibitor     | chr10p15             | signal transduction                        | ---                                   | -1.03         | 1.02            | 1.05      | 1.02        | 1.12      | -1.03       | 1.05       | -1.07        | -1.13      | -1.15        | -1.03      | 1.02         |
| GDNF        | glial cell derived neurotro    | chr5p13.1-p12        | metanephros development                    | ---                                   | 2.58          | 2.03            | 1.50      | 2.34        | 5.11      | 1.43        | 1.29       | 1.86         | 3.36       | 1.07         | 1.13       | 2.74         |
| GDPD1       | glycerophosphodiester phos     | chr17q22             | glycerol metabolic process                 | ---                                   | 1.44          | 1.21            | -2.68     | -1.21       | 1.04      | -1.07       | 2.93       | 1.90         | -1.31      | -1.27        | -1.38      | -1.52        |
| GDPD1       | glycerophosphodiester phos     | chr17q22             | glycerol metabolic process                 | ---                                   | 1.34          | -2.73           | 1.33      | -1.06       | 1.90      | 1.12        | 1.03       | -1.30        | -1.39      | -1.18        | 1.42       | -1.14        |
| GDPD5       | glycerophosphodiester phos     | chr11q13.4-q13.5     | glycerol metabolic process                 | ---                                   | 1.11          | 1.03            | -1.10     | 1.13        | -1.05     | -1.11       | 1.12       | 1.21         | -1.21      | -1.13        | -2.09      | -1.68        |
| GDPD5       | glycerophosphodiester phos     | chr11q13.4-q13.5     | glycerol metabolic process                 | ---                                   | 1.01          | -1.10           | 1.05      | 1.27        | -1.09     | -1.20       | 1.25       | 1.26         | 1.03       | -1.10        | -1.81      | -1.48        |
| GEM         | GTP binding protein overe      | chr8q13-q21          | GTP catabolic process                      | ---                                   | -1.09         | -1.08           | -1.12     | -1.71       | -1.09     | 1.02        | -1.51      | -1.58        | 1.97       | 1.84         | 2.46       | 1.47         |
| GEMN7       | gem (nuclear organelle) as     | chr19q13.32          | spliceosomal snRNP assembly                | ---                                   | -1.15         | -1.07           | -1.03     | 1.08        | 1.05      | -1.06       | 1.04       | -1.05        | 1.10       | 1.14         | 1.16       | 1.29         |
| GEN1        | GEN1 Holliday junction 5'      | chr2p24.2            | DNA repair                                 | ---                                   | -1.14         | -1.13           | -1.02     | 1.14        | -1.01     | 1.07        | -1.03      | 1.04         | -2.29      | -2.47        | -1.71      | -1.59        |
| GET4 // SUN | golgi to ER traffic protein    | chr7p22.3            | transport                                  | ---                                   | 1.07          | 1.09            | 1.18      | 1.36        | 1.02      | -1.22       | 1.25       | 1.20         | 1.38       | 1.12         | 1.39       | 1.60         |
| GFAP        | glial fibrillary acidic protei | chr17q21             | response to wounding                       | ---                                   | 1.35          | -2.01           | 1.05      | -3.14       | -1.64     | 1.08        | 2.54       | 2.00         | 2.22       | 3.00         | -2.68      | -1.41        |
| GFR         | growth factor, augmentor of    | chr16p13.3-p13.12    | protein targeting to mitochondrion         | ---                                   | 1.04          | -1.09           | 1.22      | 1.16        | -1.03     | -1.06       | 1.13       | 1.11         | 1.27       | 1.04         | 1.88       | 1.88         |
| GFM1        | G elongation factor, mito      | chr3q25              | GTP catabolic process                      | ---                                   | 1.81          | 1.22            | -2.00     | -1.19       | -1.11     | -1.22       | -1.63      | 1.06         | 1.64       | 1.37         | -1.03      | -1.75        |
| GFM1        | G elongation factor, mito      | chr3q25              | GTP catabolic process                      | ---                                   | 1.07          | 1.05            | -1.02     | 1.01        | -1.03     | 1.05        | -1.03      | -1.00        | 1.06       | 1.07         | 1.36       | 1.33         |
| GFM1        | G elongation factor, mito      | chr3q25              | GTP catabolic process                      | ---                                   | 1.05          | 1.03            | -1.10     | -1.11       | 1.11      | -1.02       | -1.20      | -1.05        | -1.07      | 1.07         | 1.27       | 1.13         |
| GFOD1       | glucose-fructose oxidoredu     | chr6pter-p22.1       | metabolic process                          | ---                                   | 1.05          | -1.07           | 1.01      | 1.11        | 1.05      | 1.11        | 1.09       | 1.09         | 1.15       | 1.01         | 1.20       | 1.37         |
| GFOD2       | glucose-fructose oxidoredu     | chr16q22.1           | extracellular matrix organization          | ---                                   | 1.05          | 1.09            | 1.07      | 1.28        | 1.08      | 1.01        | 1.08       | -1.00        | -1.30      | -1.07        | -1.64      | -1.31        |
| GFOD2       | glucose-fructose oxidoredu     | chr16q22.1           | extracellular matrix organization          | ---                                   | 1.17          | 1.11            | -1.04     | -1.10       | 1.24      | 1.31        | 1.02       | 1.17         | 1.21       | 1.11         | 1.25       | 1.42         |
| GFPT1       | glutamine-fructose-6-phos      | chr2p13              | carbohydrate metabolic process             | ---                                   | 1.30          | 1.15            | 1.11      | 1.04        | -1.13     | 1.10        | 1.04       | 1.08         | 1.31       | 1.42         | 1.82       | 1.53         |
| GFPT1       | glutamine-fructose-6-phos      | chr2p13              | carbohydrate metabolic process             | ---                                   | -1.04         | -1.01           | 1.21      | 1.17        | 1.09      | 1.05        | 1.37       | 1.02         | 2.61       | 2.20         | 3.58       | 3.24         |
| GFPT1       | glutamine-fructose-6-phos      | chr2p13              | carbohydrate metabolic process             | ---                                   | 1.19          | 1.08            | 1.03      | -1.20       | -1.15     | 1.06        | -1.26      | -1.12        | 1.19       | 1.34         | 1.48       | 1.35         |
| GFPT2       | glutamine-fructose-6-phos      | chr5q34-q35          | carbohydrate metabolic process             | ---                                   | -1.16         | -1.10           | -1.16     | -1.18       | 1.22      | 1.04        | 1.36       | 1.62         | 3.15       | 3.03         | 2.88       | 3.08         |
| GFRA1       | GDNF family receptor alphe     | chr10q26.11          | kidney development                         | Circadian_Exercise // GenMAPP         | -1.52         | -2.04           | -2.42     | -1.29       | -4.20     | -2.02       | 1.27       | 1.54         | 5.47       | -1.20        | -1.01      | 1.31         |
| GGA2        | golgi-associated, gamma ad     | chr16p12             | transport                                  | ---                                   | -1.28         | -1.15           | -1.37     | -1.18       | 1.04      | -1.02       | 1.41       | 1.36         | 1.32       | 1.47         | 1.52       | 1.62         |
| GGA2        | golgi-associated, gamma ad     | chr16p12             | transport                                  | ---                                   | 1.01          | -1.01           | 1.01      | 1.02        | -1.01     | -1.03       | 1.08       | -1.08        | -1.15      | -1.13        | 1.14       | 1.40         |
| GGA2        | golgi-associated, gamma ad     | chr16p12             | transport                                  | ---                                   | -1.14         | -1.13           | 1.15      | 1.19        | 1.15      | -1.05       | 1.23       | 1.10         | -1.19      | -1.31        | -1.36      | -1.30        |
| GGA2        | golgi-associated, gamma ad     | chr16p12             | transport                                  | ---                                   | -1.02         | -1.09           | 1.07      | 1.19        | 1.00      | -1.02       | 1.21       | 1.09         | -1.18      | -1.07        | -1.48      | -1.30        |
| GGA3        | golgi-associated, gamma ad     | chr17q25.1           | transport                                  | ---                                   | 1.07          | 1.09            | 1.08      | 1.05        | 1.11      | 1.07        | 1.09       | 1.18         | -1.18      | -1.20        | 1.18       | 1.17         |
| GGACT       | gamma-glutamylamine cycl       | chr13q32.3           | cellular modified amino acid catabolic p   | ---                                   | 1.18          | 1.21            | 1.09      | -1.22       | 1.36      | 1.41        | 1.10       | -1.07        | -1.92      | -2.17        | -2.94      | -4.18        |
| GGCX        | gamma-glutamyl carboxyla       | chr2p12              | cellular protein modification process      | ---                                   | -1.21         | -1.09           | -1.01     | -1.00       | -1.06     | -1.09       | 1.09       | 1.16         | 1.14       | 1.26         | 1.19       | 1.05         |
| GGCX        | gamma-glutamyl carboxyla       | chr2p12              | cellular protein modification process      | ---                                   | 1.04          | -1.02           | 1.16      | 1.09        | -1.07     | -1.05       | 1.21       | 1.13         | 1.10       | 1.05         | 1.08       | 1.23         |
| GGCX        | gamma-glutamyl carboxyla       | chr2p12              | cellular protein modification process      | ---                                   | 1.01          | -1.06           | -1.03     | -1.02       | 1.03      | 1.04        | -1.10      | -1.06        | -1.30      | -1.22        | -1.35      | -1.26        |
| GGCX        | gamma-glutamyl carboxyla       | chr2p12              | cellular protein modification process      | ---                                   | -1.07         | 1.04            | -1.08     | -1.00       | -1.15     | -1.11       | -1.06      | -1.07        | 1.01       | -1.06        | -1.22      | -1.22        |
| GGH         | gamma-glutamyl hydrolase       | chr8q12.3            | glutamine metabolic process                | ---                                   | 1.07          | 1.02            | 1.01      | 1.06        | 1.00      | 1.00        | -1.08      | -1.03        | -1.09      | 1.01         | -1.04      | 1.03         |
| GGNBP2      | gametogenetin binding prot     | chr17q12             | multicellular organismal development       | ---                                   | -1.06         | -1.07           | 1.10      | 1.04        | 1.10      | 1.12        | 1.01       | 1.03         | 1.24       | 1.27         | 1.34       | 1.48         |
| GGNBP2      | gametogenetin binding prot     | chr17q12             | multicellular organismal development       | ---                                   | -1.13         | -1.04           | -1.02     | -1.02       | -1.09     | -1.00       | -1.03      | 1.09         | 1.09       | 1.09         | 1.35       | 1.38         |
| GGPS1       | geranylgeranyl diphosphate     | chr1q43              | cholesterol biosynthetic process           | ---                                   | -1.02         | -1.04           | 1.10      | 1.07        | 1.01      | 1.02        | -1.05      | -1.08        | 1.42       | 1.30         | 1.88       | 1.80         |
| GGT7        | gamma-glutamyltransferase      | chr20q11.22          | glutathione metabolic process              | ---                                   | 1.31          | -1.13           | -1.86     | -1.55       | 3.77      | 3.06        | 1.62       | 1.45         | 1.28       | 1.48         | 1.14       | 1.46         |
| GGT7        | gamma-glutamyltransferase      | chr20q11.22          | glutathione metabolic process              | ---                                   | 1.09          | 1.00            | -1.02     | 1.23        | 1.13      | 1.53        | -1.14      | 1.09         | -1.59      | -1.26        | 1.36       | 1.84         |
| GGTA1P      | glycoprotein, alpha-galacto    | chr9q33.2            | carbohydrate metabolic process             | ---                                   | 1.49          | 1.39            | -2.54     | -1.43       | 2.12      | -1.23       | -1.30      | 1.60         | 1.49       | -1.67        | -1.20      | -1.46        |
| GHTM        | growth hormone inducible       | chr10q23.1           | apoptotic process                          | ---                                   | 1.00          | -1.05           | 1.01      | -1.03       | 1.07      | 1.01        | 1.10       | -1.03        | 1.35       | 1.26         | 1.36       | 1.41         |
| GHTM        | growth hormone inducible       | chr10q23.1           | apoptotic process                          | ---                                   | -1.04         | 1.03            | -1.05     | -1.04       | -1.04     | -1.01       | 1.04       | 1.04         | 1.08       | 1.17         | 1.19       | 1.23         |
| GHRHR       | growth hormone releasing h     | chr7p14              | signal transduction                        | GPCRDB_Class_B_Secretin-like // GenMA | 1.05          | -1.32           | -1.61     | -2.04       | -1.61     | -1.87       | -1.02      | -1.38        | 6.80       | 10.86        | -1.90      | 2.32         |
| GID4        | GID complex subunit 4, VI      | chr17p11.2           | 0                                          | ---                                   | -1.02         | 1.00            | 1.07      | 1.08        | -1.19     | 1.04        | 1.06       | 1.03         | -1.29      | -1.10        | 1.23       | -1.00        |
| GID4        | GID complex subunit 4, VI      | chr17p11.2           | 0                                          | ---                                   | 1.09          | 1.03            | -1.08     | 1.11        | -1.10     | -1.29       | 1.31       | 1.20         | 1.76       | 1.69         | 1.78       | 1.75         |
| GID8        | GID complex subunit 8 hor      | chr20q13.33          | 0                                          | ---                                   | 1.07          | 1.09            | 1.08      | -1.07       | -1.05     | 1.03        | -1.18      | -1.18        | -1.84      | -1.75        | -1.80      | -1.85        |
| GIF         | gastric intrinsic factor (vita | chr11q13             | vitamin metabolic process                  | ---                                   | 2.36          | 1.81            | 1.69      | 2.24        | -1.41     | -1.89       | 1.08       | -1.09        | 1.78       | 1.68         | 1.07       | -2.34        |
| GIGYF1      | GRB10 interacting GYF pr       | chr7q22              | insulin-like growth factor receptor signal | ---                                   | 1.50          | 1.17            | -1.53     | -1.71       | 1.58      | 1.59        | -1.06      | -1.92        | -2.44      | -2.02        | -1.15      | -1.07        |
| GIGYF1      | GRB10 interacting GYF pr       | chr7q22              | insulin-like growth factor receptor signal | ---                                   | -1.02         | -1.12           | 1.07      | 1.21        | 1.09      | -1.00       | 1.10       | 1.18         | -1.41      | -1.33        | -1.44      | -1.39        |
| GIGYF2      | GRB10 interacting GYF pr       | chr2q37.1            | S phase of mitotic cell cycle              | ---                                   | -1.05         | 1.01            | -1.09     | -1.29       | 1.01      | -1.06       | 1.01       | 1.03         | -1.45      | -1.43        | 1.03       | -1.14        |
| GIGYF2      | GRB10 interacting GYF pr       | chr2q37.1            | feeding behavior                           | ---                                   | 2.18          | 1.65            | -1.28     | -1.15       | -1.22     | 1.58        | 1.27       | -1.02        | -1.49      | 1.11         | 1.85       | 1.49         |
| GIGYF2      | GRB10 interacting GYF pr       | chr2q37.1            | S phase of mitotic cell cycle              | ---                                   | 1.13          | 1.14            | 1.04      | -1.03       | -1.01     | 1.01        | -1.06      | -1.13        | -1.34      | -1.35        | -1.01      | -1.13        |
| GIMAP1      | GTPase, IMAP family mem        | chr7q36.1            | B cell differentiation                     | ---                                   | -1.01         | 2.30            | 5.17      | 2.10        | 1.15      | -1.56       | -6.11      | 5.35         | 1.93       | 1.58         | 1.58       | -1.01        |
| GIMAP1-GIM  | GIMAP1-GIMAP5 readthr          | chr7q // chr7q36.1   | temperature homeostasis                    | ---                                   | 3.15          | 2.06            | 1.10      | -1.07       | -1.28     | 1.02        | 1.74       | 1.78         | -1.29      | 1.45         | 1.58       | 3.47         |
| GIMAP2      | GTPase, IMAP family mem        | chr7q36.1            | 0                                          | ---                                   | 1.56          | -1.05           | -1.30     | 1.58        | 1.30      | 1.03        | 1.22       | 1.03         | 1.66       | 1.64         | 1.13       | 1.38         |

| ID                                    | Gene Title                           | Chromosomal Location | 1st Gene Ontology Biological Process       | Pathway                                    | A2497 30 mins | A2497P' 30 mins | A2497 2 h | A2497P' 2 h | A2497 4 h | A2497P' 4 h | A2497 24 h | A2497P' 24 h | A2497 48 h | A2497P' 48 h | A2497 72 h | A2497P' 72 h |
|---------------------------------------|--------------------------------------|----------------------|--------------------------------------------|--------------------------------------------|---------------|-----------------|-----------|-------------|-----------|-------------|------------|--------------|------------|--------------|------------|--------------|
| GIN1                                  | gypsy retrotransposon integrase      | chr5q21.1            | DNA integration                            | ---                                        | 1.32          | 1.49            | 1.22      | 1.17        | -1.02     | 1.26        | -1.01      | -1.19        | -1.09      | 1.13         | 1.68       | 1.51         |
| GIN1                                  | gypsy retrotransposon integrase      | chr5q21.1            | DNA integration                            | ---                                        | 1.12          | 1.13            | 1.04      | -1.06       | 1.01      | -1.04       | -1.07      | -1.14        | -1.12      | -1.16        | 1.29       | 1.25         |
| GINM1                                 | glycoprotein integral membrane       | chr6q25.1            | 0                                          | ---                                        | -1.06         | -1.04           | -1.03     | -1.10       | 1.09      | -1.03       | 1.17       | 1.07         | 1.11       | 1.09         | 1.16       | 1.20         |
| GINS1                                 | GINs complex subunit 1               | (chr20p11.2)         | S phase of mitotic cell cycle              | ---                                        | 1.01          | 1.06            | -1.09     | -1.04       | -1.02     | 1.05        | -1.48      | -1.22        | -1.40      | -1.09        | -1.09      | -1.16        |
| GINS2                                 | GINs complex subunit 2               | (chr16q24.1)         | S phase of mitotic cell cycle              | ---                                        | -1.04         | -1.05           | -1.04     | 1.01        | -1.08     | -1.09       | -1.06      | 1.00         | -1.27      | -1.21        | -1.57      | -1.32        |
| GINS2                                 | GINs complex subunit 2               | (chr16q24.1)         | S phase of mitotic cell cycle              | ---                                        | -1.09         | -1.17           | 1.23      | 1.11        | 1.05      | 1.03        | -1.22      | -1.19        | -1.90      | -1.74        | -1.74      | -1.98        |
| GINS3                                 | GINs complex subunit 3               | (chr16q21)           | DNA replication                            | ---                                        | 1.01          | 1.02            | -1.03     | 1.01        | -1.19     | -1.00       | -1.27      | -1.28        | -1.66      | -1.66        | -1.58      | -1.83        |
| GINS3                                 | GINs complex subunit 3               | (chr16q21)           | DNA replication                            | ---                                        | 1.01          | 1.17            | -1.11     | -1.21       | -1.16     | -1.08       | -1.22      | -1.29        | -1.51      | -1.52        | -1.39      | -1.61        |
| GINS4                                 | GINs complex subunit 4               | (chr8p11.2)          | S phase of mitotic cell cycle              | ---                                        | -1.12         | 1.21            | -1.16     | 1.00        | -1.18     | -1.13       | -1.34      | -1.05        | -1.37      | -1.32        | -1.38      | -1.37        |
| GIPC3                                 | GIPC PDZ domain containing           | chr19p13.3           | 0                                          | ---                                        | -1.06         | -1.11           | 1.08      | 1.06        | -1.38     | -1.07       | -1.01      | 1.09         | 1.76       | 1.26         | 1.27       | 1.27         |
| GIT1                                  | G protein-coupled receptor           | chr17p11.2           | regulation of G-protein coupled receptor   | ---                                        | 1.28          | 1.05            | 1.00      | 1.18        | -1.26     | 1.08        | -1.28      | -1.05        | 1.09       | -1.33        | -1.20      | ---          |
| GIT2                                  | G protein-coupled receptor           | chr12q24.1           | regulation of G-protein coupled receptor   | Integrin-mediated_cell_adhesion_KEGG // C  | 1.50          | 1.47            | -1.17     | -1.58       | -1.26     | 1.05        | 1.48       | 1.22         | 2.17       | 1.84         | 2.96       | 2.50         |
| GIT2                                  | G protein-coupled receptor           | chr12q24.1           | regulation of G-protein coupled receptor   | Integrin-mediated_cell_adhesion_KEGG // C  | 1.09          | 1.26            | -1.03     | -1.08       | -1.01     | -1.19       | 1.04       | 1.07         | -1.82      | -2.08        | 1.09       | -1.06        |
| GIT2                                  | G protein-coupled receptor           | chr12q24.1           | regulation of G-protein coupled receptor   | Integrin-mediated_cell_adhesion_KEGG // C  | 1.22          | 1.09            | -1.04     | 1.03        | 1.30      | 1.10        | -1.29      | -1.04        | -1.75      | -1.86        | -2.00      | -1.71        |
| GJA1                                  | gap junction protein, alpha          | chr6q22.31           | osteoblast differentiation                 | Calcium_regulation_in_cardiac_cells // Gen | 1.11          | 1.08            | -1.09     | -1.03       | 1.01      | 1.09        | -1.15      | -1.01        | -1.05      | 1.02         | 1.14       | 1.06         |
| GJA9-MYCB                             | GJA9-MYCBP readthrough               | chr1p // chr1p33-p3  | transcription, DNA-dependent               | Calcium_regulation_in_cardiac_cells // Gen | 1.03          | -1.01           | -1.13     | -1.08       | 1.11      | 1.04        | -1.09      | 1.00         | 1.08       | -1.24        | -1.17      | ---          |
| GJA9-MYCB                             | GJA9-MYCBP readthrough               | chr1p // chr1p33-p3  | transcription, DNA-dependent               | Calcium_regulation_in_cardiac_cells // Gen | -1.04         | -1.21           | 1.09      | 1.02        | -1.06     | 1.04        | -1.13      | -1.00        | -1.14      | -1.07        | -1.40      | -1.25        |
| GJB1                                  | gap junction protein, beta 1         | chrXq13.1            | transport                                  | Calcium_regulation_in_cardiac_cells // Gen | 1.01          | -1.50           | -1.34     | -1.51       | -1.89     | -1.49       | -2.30      | -1.50        | 1.64       | -1.03        | -1.55      | 1.37         |
| GJB2                                  | gap junction protein, beta 2         | chr13q11-q12         | transport                                  | Calcium_regulation_in_cardiac_cells // Gen | 1.33          | -1.08           | 1.23      | 1.33        | 1.12      | 1.20        | 1.71       | 1.18         | 3.48       | 3.31         | 2.99       | 2.43         |
| GJB3                                  | gap junction protein, beta 3         | chr1p34              | in utero embryonic development             | Calcium_regulation_in_cardiac_cells // Gen | 1.02          | -1.06           | -1.05     | -1.26       | -1.11     | -1.14       | 1.05       | 1.16         | 2.64       | 1.81         | 2.51       | 2.73         |
| GJB3                                  | gap junction protein, beta 3         | chr1p34              | in utero embryonic development             | Calcium_regulation_in_cardiac_cells // Gen | -1.00         | 1.01            | -1.06     | -1.16       | 1.10      | -1.02       | 1.09       | 1.22         | 2.60       | 1.68         | 2.33       | 2.41         |
| GJB5                                  | gap junction protein, beta 5         | chr1p35.1            | cell communication                         | Calcium_regulation_in_cardiac_cells // Gen | -1.19         | -1.22           | 1.03      | 1.10        | 1.16      | 1.29        | -1.22      | 1.13         | 1.48       | 1.08         | 2.11       | 1.89         |
| GJC1                                  | gap junction protein, gamma          | chr17q21.31          | vasculogenesis                             | ---                                        | -1.40         | -1.92           | -1.31     | -1.22       | 1.52      | 1.06        | -1.65      | -1.52        | -2.06      | -1.83        | -2.62      | -1.18        |
| GJC1                                  | gap junction protein, gamma          | chr17q21.31          | vasculogenesis                             | ---                                        | 1.77          | 1.53            | -1.50     | -1.84       | 1.17      | 1.18        | -1.54      | 1.01         | 1.68       | 1.59         | 2.80       | 1.74         |
| GJC1                                  | gap junction protein, gamma          | chr17q21.31          | vasculogenesis                             | ---                                        | -1.06         | -1.02           | 1.09      | 1.01        | -1.08     | -1.06       | -1.12      | -1.13        | -1.44      | -1.26        | -1.15      | -1.20        |
| GJC2                                  | gap junction protein, gamma          | chr1q42.13           | cell communication                         | ---                                        | -1.15         | -1.24           | 1.13      | 1.61        | -1.27     | -1.54       | 1.74       | -1.04        | 1.86       | 2.02         | 1.49       | 1.44         |
| GK                                    | glycerol kinase                      | chrXp21.3            | carbohydrate metabolic process             | ---                                        | 1.20          | 1.27            | 1.06      | 1.17        | -1.09     | 1.13        | -1.01      | -1.01        | -1.97      | -1.46        | -1.94      | -2.28        |
| GK                                    | glycerol kinase                      | chrXp21.3            | carbohydrate metabolic process             | ---                                        | 1.38          | 1.32            | 1.11      | -1.02       | -1.02     | -1.03       | -1.10      | -1.03        | -1.63      | -1.53        | -2.09      | -2.89        |
| GK3P                                  | glycerol kinase 3 pseudogene         | chr4q32.1            | carbohydrate metabolic process             | ---                                        | 1.09          | 1.17            | 1.39      | 1.41        | -1.10     | -1.19       | -1.03      | 1.43         | -1.39      | -1.11        | -1.41      | -1.56        |
| GK-AS1 /// GK antisense RNA 1 /// NUC | ---                                  | ---                  | 0                                          | ---                                        | 1.19          | -1.02           | 1.08      | 1.10        | -1.20     | 1.12        | -1.17      | 1.04         | -1.77      | -1.50        | -1.34      | -1.26        |
| GLA                                   | galactosidase, alpha                 | chrXq22              | carbohydrate metabolic process             | ---                                        | -1.14         | 1.00            | -1.08     | 1.06        | -1.04     | -1.19       | 1.05       | 1.12         | 1.36       | 1.17         | 1.33       | 1.36         |
| GLB1L                                 | galactosidase, beta 1-like           | chr2q35              | carbohydrate metabolic process             | ---                                        | -1.09         | -1.36           | -1.11     | -1.01       | 1.16      | 1.10        | 1.22       | 1.10         | -1.21      | -1.10        | -1.84      | -1.35        |
| GLB1L2                                | galactosidase, beta 1-like 2         | chr11q25             | carbohydrate metabolic process             | ---                                        | -1.17         | -1.33           | 2.34      | 1.27        | 1.03      | -1.56       | 1.02       | 1.36         | -1.09      | -2.06        | -1.70      | -1.35        |
| GLB1L3                                | galactosidase, beta 1-like 3         | chr11q25             | carbohydrate metabolic process             | ---                                        | 3.31          | 1.08            | 3.44      | 3.77        | -2.22     | -1.23       | -2.55      | 1.71         | 1.90       | -1.02        | -3.95      | -2.17        |
| GLCC1                                 | glucocorticoid induced transcription | chr7p21.3            | 0                                          | ---                                        | 1.01          | 1.35            | -1.06     | -1.32       | 1.05      | -1.12       | -1.07      | 1.14         | -2.28      | -1.96        | -1.42      | -1.98        |
| GLCC1                                 | glucocorticoid induced transcription | chr7p21.3            | 0                                          | ---                                        | 1.22          | 1.26            | -1.04     | -1.17       | -1.05     | 1.06        | -1.42      | -1.25        | -2.43      | -2.28        | -1.56      | -1.87        |
| GLCC1                                 | glucocorticoid induced transcription | chr7p21.3            | 0                                          | ---                                        | 1.20          | -1.10           | 1.12      | -1.16       | -1.48     | 1.03        | -1.89      | -1.20        | -5.09      | -3.87        | -2.41      | -1.67        |
| GLCC1                                 | glucocorticoid induced transcription | chr7p21.3            | 0                                          | ---                                        | 1.06          | 1.02            | 1.09      | 1.11        | 1.09      | 1.24        | -1.22      | -1.17        | -2.44      | -2.06        | -1.59      | -1.57        |
| GLDC                                  | glycine dehydrogenase (cytosolic)    | chr9p22              | cellular amino acid metabolic process      | ---                                        | -2.17         | -1.74           | 1.26      | -2.25       | 1.04      | 1.49        | -2.87      | -1.67        | 2.70       | 2.65         | -1.38      | -1.30        |
| GLE1                                  | GLE1 RNA export mediator             | chr9q34.11           | mRNA export from nucleus                   | ---                                        | -1.12         | -1.20           | 1.08      | 1.11        | -1.10     | -1.06       | -1.12      | 1.07         | -1.20      | -1.14        | 1.08       | 1.37         |
| GLE1                                  | GLE1 RNA export mediator             | chr9q34.11           | mRNA export from nucleus                   | ---                                        | -1.18         | -1.13           | -1.12     | -1.07       | -1.21     | -1.14       | 1.03       | 1.04         | 1.05       | -1.05        | -1.05      | 1.12         |
| GLG1                                  | golgi glycoprotein 1                 | chr16q22.3           | negative regulation of protein processing  | ---                                        | 1.02          | 1.04            | 1.02      | -1.04       | 1.03      | 1.01        | -1.04      | -1.14        | -1.25      | -1.15        | -1.03      | -1.05        |
| GLI2                                  | GLI family zinc finger 2             | chr2q14              | negative regulation of transcription from  | ---                                        | 1.14          | -1.22           | 1.16      | 1.07        | 1.35      | 1.21        | -1.00      | -1.14        | -1.08      | -1.47        | -1.62      | -1.18        |
| GLI2                                  | GLI family zinc finger 2             | chr2q14              | negative regulation of transcription from  | ---                                        | 1.44          | 1.30            | -1.03     | 1.04        | -1.01     | 1.05        | 1.03       | 1.01         | -1.58      | -1.44        | -1.28      | -1.51        |
| GLI3                                  | GLI family zinc finger 3             | chr7p13              | negative regulation of transcription from  | ---                                        | -1.21         | -1.02           | 1.17      | 1.08        | -1.23     | -1.29       | 1.10       | 1.05         | -1.22      | -1.37        | -1.40      | -1.42        |
| GLIPR1                                | GLI pathogenesis-related 1           | chr12q21.2           | cellular lipid metabolic process           | ---                                        | 1.09          | 1.34            | -1.07     | -1.31       | -1.08     | -1.04       | -1.02      | -1.01        | 1.40       | 1.33         | 1.32       | -1.32        |
| GLIPR1                                | GLI pathogenesis-related 1           | chr12q21.2           | cellular lipid metabolic process           | ---                                        | -1.16         | -1.17           | 1.03      | 1.03        | 1.24      | 1.13        | -1.13      | -1.10        | 1.12       | 1.04         | 1.54       | 1.46         |
| GLIS2                                 | GLIS family zinc finger 2            | chr16p13.3           | negative regulation of transcription from  | ---                                        | 1.16          | 1.17            | 1.08      | 1.11        | 1.13      | -1.02       | 1.21       | 1.21         | 1.16       | 1.06         | 1.12       | 1.01         |
| GLMN                                  | glomulin, FKBP associated            | chr1p22.1            | vasculogenesis                             | ---                                        | -1.01         | -1.11           | 1.03      | 1.03        | 1.06      | 1.15        | -1.14      | -1.12        | -1.23      | -1.26        | -1.44      | -1.66        |
| GLOD4                                 | glyoxalase domain containing         | chr17p13.3           | 0                                          | ---                                        | 1.11          | 1.12            | 1.02      | -1.12       | -1.07     | -1.07       | -1.01      | -1.02        | -1.49      | -1.39        | -1.21      | -1.31        |
| GLP1R                                 | glucagon-like peptide 1 receptor     | chr6p21              | energy reserve metabolic process           | GPCRDB_Class_B_Secretin-like // GenMA      | 2.13          | 4.73            | -1.81     | -1.23       | 2.27      | 6.08        | -1.21      | -2.21        | -2.06      | 1.59         | 1.41       | -1.96        |
| GLP2R                                 | glucagon-like peptide 2 receptor     | chr17p13.3           | signal transduction                        | GPCRDB_Class_B_Secretin-like // GenMA      | -1.06         | 1.15            | 1.63      | 1.68        | -1.95     | 1.02        | 1.32       | -2.30        | 1.50       | 1.12         | -2.66      | -1.17        |
| GLRB                                  | glycine receptor, beta               | chr4q31.3            | startle response                           | ---                                        | 1.21          | 1.05            | 1.02      | 1.13        | 1.08      | 1.14        | -1.20      | -1.05        | -1.59      | -1.14        | -2.17      | -1.81        |
| GLRB                                  | glycine receptor, beta               | chr4q31.3            | startle response                           | ---                                        | 1.10          | -1.07           | 1.10      | -1.00       | -1.31     | -1.02       | -1.45      | -1.37        | -1.65      | -1.43        | -2.38      | -2.72        |
| GLRB                                  | glycine receptor, beta               | chr4q31.3            | startle response                           | ---                                        | -1.03         | 1.05            | 1.03      | -1.40       | -1.06     | 1.03        | 1.17       | 1.00         | -1.28      | -1.09        | -1.53      | -1.33        |
| GLRX                                  | glutaredoxin (thioltransferase)      | chr5q14              | nucleobase-containing small molecule in    | ---                                        | -1.02         | -1.02           | -1.05     | 1.02        | -1.09     | -1.05       | 1.08       | -1.06        | 1.49       | 1.49         | 1.09       | 1.19         |
| GLRX                                  | glutaredoxin (thioltransferase)      | chr5q14              | nucleobase-containing small molecule in    | ---                                        | -1.15         | -1.07           | -1.13     | -1.05       | 1.06      | -1.08       | 1.28       | 1.12         | 1.79       | 1.79         | 1.24       | 1.43         |
| GLS                                   | glutaminase                          | chr2q32-q34          | regulation of respiratory gaseous exchange | ---                                        | 1.51          | 1.77            | -1.04     | -1.13       | -1.41     | -1.39       | 1.34       | 1.17         | 2.55       | 2.00         | 1.92       | 1.45         |
| GLS                                   | glutaminase                          | chr2q32-q34          | regulation of respiratory gaseous exchange | ---                                        | -1.01         | -1.03           | 1.09      | -1.25       | 1.34      | 1.14        | -1.31      | -1.16        | -1.40      | -1.28        | 1.31       | 1.45         |
| GLS                                   | glutaminase                          | chr2q32-q34          | regulation of respiratory gaseous exchange | ---                                        | 1.09          | 1.15            | -1.10     | -1.08       | 1.05      | -1.04       | 1.46       | 1.32         | 1.22       | 1.09         | 3.13       | 3.34         |
| GLS                                   | glutaminase                          | chr2q32-q34          | regulation of respiratory gaseous exchange | ---                                        | 1.22          | 1.04            | 1.01      | -1.30       | 1.38      | -1.02       | -1.32      | -1.31        | -1.60      | -1.74        | 1.35       | 1.41         |
| GLTSCR1L                              | GLTSCR1-like                         | chr6p21.1            | 0                                          | ---                                        | 1.16          | 1.15            | 1.06      | -1.02       | -1.05     | -1.14       | 1.03       | 1.05         | -1.52      | -1.37        | -1.29      | -1.43        |
| GLTSCR1L                              | GLTSCR1-like                         | chr6p21.1            | 0                                          | ---                                        | 1.05          | 1.05            | -1.08     | -1.01       | -1.27     | 1.02        | -1.19      | 1.01         | -1.76      | -1.27        | -1.42      | -1.31        |
| GLUD1                                 | glutamate dehydrogenase 1            | chr10q23.3           | cellular amino acid metabolic process      | ---                                        | 1.15          | 1.17            | -1.10     | -1.14       | 1.05      | 1.08        | -1.05      | 1.01         | 1.23       | 1.19         | 1.57       | 1.50         |
| GLUD1                                 | glutamate dehydrogenase 1            | chr10q23.3           | cellular amino acid metabolic process      | ---                                        | 1.09          | 1.16            | 1.03      | -1.00       | -1.17     | -1.09       | 1.04       | -1.01        | 1.23       | 1.15         | 1.32       | 1.22         |
| GLUD2                                 | glutamate dehydrogenase 2            | chrXq24-q25          | cellular amino acid metabolic process      | ---                                        | -1.22         | -1.10           | 1.09      | 1.13        | 1.17      | 1.06        | 1.16       | 1.32         | 1.27       | 1.73         | 1.73       | 1.84         |

| ID          | Gene Title                   | Chromosomal Location | 1st Gene Ontology Biological Process      | Pathway                                    | A2497 30 mins | A2497P' 30 mins | A2497 2 h | A2497P' 2 h | A2497 4 h | A2497P' 4 h | A2497 24 h | A2497P' 24 h | A2497 48 h | A2497P' 48 h | A2497 72 h | A2497P' 72 h |
|-------------|------------------------------|----------------------|-------------------------------------------|--------------------------------------------|---------------|-----------------|-----------|-------------|-----------|-------------|------------|--------------|------------|--------------|------------|--------------|
| GLUL        | glutamate-ammonia ligase     | chr1q31              | neurotransmitter uptake                   | ---                                        | -1.08         | -1.08           | 1.04      | 1.01        | 1.05      | 1.28        | -1.38      | -1.35        | -2.43      | -3.04        | 1.18       | -1.10        |
| GLUL        | glutamate-ammonia ligase     | chr1q31              | neurotransmitter uptake                   | ---                                        | -1.06         | 1.01            | -1.10     | -1.08       | -1.04     | -1.02       | -1.09      | -1.07        | -1.26      | -1.21        | -1.22      | -1.39        |
| GLUL        | glutamate-ammonia ligase     | chr1q31              | neurotransmitter uptake                   | ---                                        | -1.07         | -1.14           | 1.01      | -1.02       | -1.00     | -1.09       | 1.01       | -1.05        | 1.03       | -1.37        | 1.07       | -1.09        |
| GLUL        | glutamate-ammonia ligase     | chr1q31              | neurotransmitter uptake                   | ---                                        | -1.06         | -1.06           | 1.03      | 1.02        | 1.11      | 1.05        | -1.02      | -1.07        | -1.18      | -1.46        | 1.10       | -1.17        |
| GLYAT       | glycine-N-acyltransferase    | chr11q12.1           | glycine metabolic process                 | ---                                        | 2.50          | 5.19            | -3.68     | -1.92       | -10.64    | -1.22       | 3.34       | -1.72        | 9.26       | 10.47        | -1.95      | -1.04        |
| GLYAT       | glycine-N-acyltransferase    | chr11q12.1           | glycine metabolic process                 | ---                                        | 1.05          | 1.40            | 1.79      | 3.21        | 3.34      | 1.67        | -3.49      | -1.59        | 1.35       | 1.78         | 2.58       | 4.49         |
| GLYATL1     | glycine-N-acyltransferase-1  | chr11q12.1           | 0                                         | ---                                        | -1.25         | 1.20            | 1.33      | -3.10       | -2.46     | -1.43       | -1.05      | -1.27        | -1.60      | -1.79        | 1.69       | 1.22         |
| GLYATL2     | glycine-N-acyltransferase-1  | chr11q12.1           | 0                                         | ---                                        | 3.01          | 3.23            | 1.43      | -1.22       | -2.33     | -1.01       | 1.46       | -1.02        | 2.07       | 1.84         | -1.43      | -1.63        |
| GLYR1       | glyoxylate reductase 1 hom   | chr16p13.3           | pentose-phosphate shunt                   | ---                                        | -1.07         | 1.22            | 1.11      | -1.37       | -1.14     | -1.09       | -1.82      | -1.14        | 4.31       | 3.01         | -1.16      | 1.27         |
| GLYR1 // SE | glyoxylate reductase 1 hom   | chr16p13.3 // chrX   | cytokinesis                               | ---                                        | 1.09          | 1.13            | -1.18     | -1.13       | -1.11     | -1.09       | 1.04       | 1.10         | -1.17      | -1.09        | -1.25      | -1.49        |
| GM2A        | GM2 ganglioside activator    | chr5q33.1            | lipid metabolic process                   | ---                                        | -1.06         | -1.04           | 1.05      | 1.00        | 1.01      | 1.08        | 1.04       | 1.04         | -1.04      | 1.06         | -1.25      | -1.12        |
| GM2A        | GM2 ganglioside activator    | chr5q33.1            | lipid metabolic process                   | ---                                        | -1.04         | -1.08           | 1.05      | 1.05        | 1.02      | -1.01       | 1.18       | 1.05         | -1.05      | -1.00        | -1.11      | -1.08        |
| GMCL1 // G  | germ cell-less, spermatog    | chr2p13.3 // chr5q3  | regulation of transcription, DNA-depend   | ---                                        | 1.14          | 1.10            | 1.19      | 1.18        | -1.36     | -1.05       | -1.23      | 1.05         | 1.17       | 1.26         | 1.71       | 1.58         |
| GMEB1       | glucocorticoid modulatory    | chr1p35.3            | transcription, DNA-dependent              | ---                                        | 1.10          | 1.13            | 1.05      | 1.10        | 1.18      | 1.18        | -1.03      | 1.14         | 1.20       | 1.16         | 1.29       | 1.25         |
| GMEB2       | glucocorticoid modulatory    | chr20q13.33          | phosphorelay signal transduction system   | ---                                        | -1.12         | -1.09           | 1.05      | -1.01       | 1.09      | -1.01       | -1.03      | -1.04        | 1.15       | 1.27         | 1.30       | 1.24         |
| GMEB2       | glucocorticoid modulatory    | chr20q13.33          | phosphorelay signal transduction system   | ---                                        | -1.11         | -1.07           | -1.05     | -1.04       | 1.09      | -1.05       | 1.11       | -1.02        | 1.24       | 1.15         | 1.42       | 1.39         |
| GMFB        | glia maturation factor, beta | chr14q22.2           | protein phosphorylation                   | ---                                        | 1.00          | 1.09            | -1.06     | -1.09       | -1.05     | -1.04       | -1.12      | -1.08        | -1.34      | -1.24        | -1.26      | -1.31        |
| GMNN        | geminin, DNA replication i   | chr6p22.3            | mitotic cell cycle                        | DNA_replication_Reactome // GenMAPP        | 1.05          | 1.07            | -1.00     | -1.01       | 1.01      | 1.02        | -1.10      | -1.10        | -1.07      | -1.14        | -1.16      | -1.26        |
| GMPPA       | GDP-mannose pyrophosph       | chr2q35              | dolichol-linked oligosaccharide biosynth  | ---                                        | -1.08         | -1.18           | -1.06     | 1.04        | -1.03     | -1.05       | 1.25       | 1.22         | 1.46       | 1.22         | 1.63       | 1.73         |
| GMPR        | guanosine monophosphate      | chr6p23              | purine nucleobase metabolic process       | ---                                        | 1.59          | 1.40            | -2.38     | -1.05       | -2.39     | -3.03       | 1.41       | 2.09         | 6.06       | 3.50         | 1.16       | 1.12         |
| GMPS        | guanine monophosphate syn    | chr3q24              | purine nucleobase metabolic process       | ---                                        | 1.09          | 1.15            | 1.12      | 1.05        | -1.03     | -1.19       | -1.10      | -1.54        | -1.78      | -1.45        | -2.00      | ---          |
| GMPS        | guanine monophosphate syn    | chr3q24              | purine nucleobase metabolic process       | ---                                        | -1.04         | 1.03            | -1.02     | 1.03        | 1.04      | -1.07       | 1.12       | 1.09         | 1.41       | 1.18         | 1.16       | 1.17         |
| GNA12       | guanine nucleotide binding   | chr7p22.2            | in utero embryonic development            | G_Protein_Signaling // GenMAPP             | -1.08         | -1.13           | 1.23      | 1.17        | -1.11     | 1.07        | -1.08      | 1.23         | -1.13      | -1.38        | -1.47      | -1.28        |
| GNA15       | guanine nucleotide binding   | chr19p13.3           | GTP catabolic process                     | G_Protein_Signaling // GenMAPP             | -1.34         | -1.43           | -5.11     | -1.54       | -2.36     | -2.17       | 2.24       | 1.46         | 9.48       | 5.64         | 6.01       | 6.91         |
| GNAI1       | guanine nucleotide binding   | chr7q21              | GTP catabolic process                     | ---                                        | 1.17          | 1.07            | -1.03     | -1.06       | -1.14     | 1.03        | -1.11      | -1.05        | -1.02      | 1.11         | 1.33       | 1.12         |
| GNAI2       | guanine nucleotide binding   | chr3p21.31           | activation of MAPKK activity              | Calcium_regulation_in_cardiac_cells // Gen | -1.10         | -1.04           | -1.14     | -1.12       | 1.02      | 1.02        | -1.16      | -1.02        | 1.18       | 1.39         | -1.04      | 1.06         |
| GNAI3       | guanine nucleotide binding   | chr1p13              | GTP catabolic process                     | Calcium_regulation_in_cardiac_cells // Gen | 1.04          | 1.18            | 1.00      | -1.01       | -1.11     | 1.10        | -1.10      | 1.02         | 1.11       | 1.09         | 1.29       | 1.29         |
| GNAI3       | guanine nucleotide binding   | chr1p13              | GTP catabolic process                     | Calcium_regulation_in_cardiac_cells // Gen | 1.25          | 1.11            | -1.04     | -1.15       | 1.08      | -1.04       | 1.23       | 1.09         | 2.32       | 1.98         | 2.79       | 2.54         |
| GNAL        | guanine nucleotide binding   | chr18p11.22-p11.21   | response to amphetamine                   | G_Protein_Signaling // GenMAPP             | -1.05         | -1.12           | 1.16      | 1.08        | 1.03      | -1.01       | -1.07      | -1.07        | -1.07      | -1.04        | -1.61      | -1.39        |
| GNAL        | guanine nucleotide binding   | chr18p11.22-p11.21   | response to amphetamine                   | G_Protein_Signaling // GenMAPP             | 1.14          | 1.01            | 1.06      | -1.01       | 1.08      | 1.02        | -1.08      | 1.32         | -2.06      | -1.73        | -1.13      | -1.29        |
| GNAL        | guanine nucleotide binding   | chr18p11.22-p11.21   | response to amphetamine                   | G_Protein_Signaling // GenMAPP             | 1.05          | 1.04            | 1.48      | 1.26        | 1.06      | 1.32        | -1.23      | -1.02        | -1.44      | -1.25        | -1.95      | -1.99        |
| GNAQ        | guanine nucleotide binding   | chr9q21              | skeletal system development               | Calcium_regulation_in_cardiac_cells // Gen | 1.04          | -1.12           | 1.02      | 1.00        | -1.00     | 1.13        | -1.07      | 1.08         | -1.60      | -1.25        | -1.57      | -1.50        |
| GNAQ        | guanine nucleotide binding   | chr9q21              | skeletal system development               | Calcium_regulation_in_cardiac_cells // Gen | 1.03          | -1.01           | 1.00      | 1.14        | 1.03      | 1.08        | -1.21      | -1.09        | -1.41      | -1.09        | -1.41      | -1.33        |
| GNAQ        | guanine nucleotide binding   | chr9q21              | skeletal system development               | Calcium_regulation_in_cardiac_cells // Gen | 1.01          | -1.02           | 1.04      | 1.04        | 1.05      | 1.04        | -1.22      | -1.32        | -1.52      | -1.23        | -1.39      | -1.32        |
| GNAS        | GNAS complex locus           | chr20q13.3           | skeletal system development               | ---                                        | -1.17         | -1.12           | -1.09     | 1.27        | -1.11     | -1.02       | 1.14       | 1.21         | -1.24      | -1.05        | -1.15      | -1.08        |
| GNAS        | GNAS complex locus           | chr20q13.3           | skeletal system development               | ---                                        | 1.22          | 1.16            | 1.23      | 1.14        | -1.01     | 1.18        | -1.12      | 1.03         | -2.00      | -1.80        | -1.30      | -1.57        |
| GNAZ        | guanine nucleotide binding   | chr22q11.22          | GTP catabolic process                     | Calcium_regulation_in_cardiac_cells // Gen | 1.04          | -1.08           | -1.04     | -1.03       | 1.12      | -1.02       | 1.18       | 1.09         | -1.23      | -1.20        | -1.37      | -1.24        |
| GNB1        | guanine nucleotide binding   | chr1p36.33           | energy reserve metabolic process          | Calcium_regulation_in_cardiac_cells // Gen | 1.06          | 1.02            | 1.08      | 1.11        | 1.02      | 1.07        | 1.30       | 1.10         | 2.15       | 1.55         | 1.96       | 1.84         |
| GNB1L       | guanine nucleotide binding   | chr22q11.2           | apoptotic process                         | ---                                        | -1.19         | -1.08           | -1.16     | -1.15       | 1.03      | -1.05       | -1.11      | 1.06         | 1.29       | -1.02        | -1.01      | 1.28         |
| GNB1L       | guanine nucleotide binding   | chr22q11.2           | apoptotic process                         | ---                                        | -1.00         | -1.40           | -1.02     | 1.27        | 1.28      | 1.52        | 1.12       | 1.21         | 1.21       | 1.21         | 1.07       | 1.19         |
| GNB2        | guanine nucleotide binding   | chr7q22              | energy reserve metabolic process          | Calcium_regulation_in_cardiac_cells // Gen | 1.18          | 1.16            | 1.06      | -1.06       | -1.07     | 1.03        | -1.06      | -1.11        | 1.36       | 1.31         | 1.20       | 1.14         |
| GNB2L1 // S | guanine nucleotide binding   | chr5q35.3            | positive regulation of protein phosphoryl | GPCRDB_Class_A_Rhodopsin-like // GenM      | -1.05         | 1.00            | -1.01     | 1.03        | 1.01      | -1.07       | 1.16       | 1.04         | 1.41       | 1.07         | 1.08       | 1.09         |
| GNB4        | guanine nucleotide binding   | chr3q26.33           | energy reserve metabolic process          | Calcium_regulation_in_cardiac_cells // Gen | 1.08          | 1.07            | -1.00     | 1.02        | -1.09     | 1.11        | -1.28      | -1.15        | -1.22      | 1.01         | -1.32      | -1.32        |
| GNB5        | guanine nucleotide binding   | chr15q21.2           | GTP catabolic process                     | Calcium_regulation_in_cardiac_cells // Gen | -1.13         | -1.26           | 1.47      | 1.90        | 1.09      | -1.10       | 1.36       | 1.17         | 3.84       | 3.53         | 2.59       | 2.28         |
| GNB5        | guanine nucleotide binding   | chr15q21.2           | GTP catabolic process                     | Calcium_regulation_in_cardiac_cells // Gen | 1.06          | 1.08            | -1.03     | -1.00       | 1.03      | 1.01        | 1.14       | 1.09         | 1.16       | 1.12         | -1.17      | -1.16        |
| GNE         | glucosamine (UDP-N-acety     | chr9p13.3            | carbohydrate metabolic process            | ---                                        | 1.07          | 1.14            | 1.19      | 1.07        | -1.03     | -1.04       | 1.16       | 1.03         | 1.09       | 1.10         | 1.91       | 1.64         |
| GNMG10      | guanine nucleotide binding   | chr9p31.3            | energy reserve metabolic process          | G_Protein_Signaling // GenMAPP             | -1.07         | -1.06           | -1.10     | -1.16       | 1.00      | -1.05       | 1.06       | -1.13        | -1.20      | -1.00        | -1.42      | -1.81        |
| GNMG11      | guanine nucleotide binding   | chr7q21              | energy reserve metabolic process          | ---                                        | -1.11         | -1.06           | -1.07     | -1.08       | -1.07     | -1.05       | -1.05      | -1.01        | -1.32      | -1.36        | -2.13      | -2.03        |
| GNMG12      | guanine nucleotide binding   | chr1p31.3            | energy reserve metabolic process          | Calcium_regulation_in_cardiac_cells // Gen | -1.21         | -1.48           | 1.03      | 1.15        | 1.06      | -1.02       | 1.01       | 1.17         | 1.14       | 1.16         | 2.26       | 1.59         |
| GNMG12      | guanine nucleotide binding   | chr1p31.3            | energy reserve metabolic process          | Calcium_regulation_in_cardiac_cells // Gen | 1.10          | 1.22            | -1.01     | -1.06       | 1.08      | -1.04       | 1.09       | -1.08        | -1.22      | -1.33        | -1.10      | -1.41        |
| GNMG2       | guanine nucleotide binding   | chr14q21             | energy reserve metabolic process          | Calcium_regulation_in_cardiac_cells // Gen | 1.49          | 1.35            | -1.12     | -1.82       | 1.39      | 1.57        | 2.04       | 1.49         | 1.10       | 1.36         | 1.89       | 1.35         |
| GNMG4       | guanine nucleotide binding   | chr14q23             | energy reserve metabolic process          | Calcium_regulation_in_cardiac_cells // Gen | 2.86          | 2.84            | -1.04     | 1.69        | -13.59    | -1.50       | -3.26      | -1.19        | 1.73       | 1.64         | -5.48      | -1.06        |
| GNMG5       | guanine nucleotide binding   | chr1p22              | energy reserve metabolic process          | Calcium_regulation_in_cardiac_cells // Gen | -1.18         | -1.10           | -1.08     | -1.13       | -1.01     | -1.02       | -1.23      | -1.01        | 1.15       | 1.28         | 1.16       | 1.20         |
| GNMG7       | guanine nucleotide binding   | chr19p13.3           | behavioral fear response                  | Calcium_regulation_in_cardiac_cells // Gen | -1.39         | -2.50           | -1.05     | -1.23       | 1.94      | -1.69       | -1.17      | 2.77         | -1.83      | -1.10        | -1.09      | 1.98         |
| GNMG11      | guanine nucleotide binding   | chr7q21.3            | GTP catabolic process                     | Calcium_regulation_in_cardiac_cells // Gen | -1.02         | -1.25           | -1.11     | 1.20        | -1.00     | -1.23       | 1.48       | 1.48         | 2.65       | 2.34         | 1.82       | 1.42         |
| GNL1        | guanine nucleotide binding   | chr6p21.3            | T cell mediated immunity                  | ---                                        | 1.12          | -1.07           | 1.13      | -1.05       | -1.17     | -1.17       | -1.04      | 1.01         | 1.06       | 1.02         | -1.73      | -1.45        |
| GNL1        | guanine nucleotide binding   | chr6p21.3            | T cell mediated immunity                  | ---                                        | -1.28         | -1.06           | -1.13     | 1.09        | 1.02      | 1.10        | 1.10       | 1.01         | 1.44       | 1.44         | 1.09       | 1.09         |
| GNL2        | guanine nucleotide binding   | chr1p34.3            | GTP catabolic process                     | ---                                        | -1.04         | -1.01           | -1.03     | 1.06        | 1.05      | -1.08       | 1.09       | 1.15         | 1.94       | 1.31         | 1.31       | 1.35         |
| GNL3 // SNC | guanine nucleotide binding   | chr3p21.1            | GTP catabolic process                     | ---                                        | -1.08         | -1.06           | -1.05     | -1.02       | 1.02      | 1.07        | 1.06       | 1.01         | 1.29       | 1.22         | 1.37       | 1.34         |
| GNL3L       | guanine nucleotide binding   | chrXp11.22           | GTP catabolic process                     | ---                                        | -1.56         | -1.17           | -1.18     | -1.28       | 1.09      | 1.12        | 1.02       | 1.01         | 1.27       | 1.27         | 1.14       | 1.25         |
| GNL3L       | guanine nucleotide binding   | chrXp11.22           | GTP catabolic process                     | ---                                        | 1.03          | -1.03           | 1.28      | -1.01       | 1.19      | 1.44        | 1.01       | -1.43        | -1.32      | -1.44        | -1.76      | -2.05        |
| GNLY        | granulysin                   | chr2p11.2            | cellular defense response                 | ---                                        | -1.00         | -1.04           | 1.07      | 1.88        | -1.07     | 1.16        | -2.36      | -3.89        | -1.56      | 1.01         | 1.52       | -1.15        |
| GNLY        | granulysin                   | chr2p11.2            | cellular defense response                 | ---                                        | 2.24          | 1.02            | -1.01     | -1.36       | 2.94      | 1.95        | 1.37       | -2.57        | 1.62       | 1.71         | 2.61       | 2.26         |
| GNPAT       | glyceronephosphate O-acyl    | chr1q42              | phospholipid metabolic process            | ---                                        | -1.08         | -1.03           | 1.04      | 1.07        | 1.12      | -1.01       | 1.02       | 1.02         | -1.13      | -1.13        | -1.44      | -1.20        |
| GNPTAB      | N-acetylglucosamine-1-ph     | chr12q23.2           | protein secretion                         | ---                                        | 1.01          | 1.11            | 1.01      | -1.09       | 1.10      | 1.02        | -1.09      | 1.03         | 1.19       | 1.17         | 1.32       | 1.06         |
| GNPTAB      | N-acetylglucosamine-1-ph     | chr12q23.2           | protein secretion                         | ---                                        | -1.13         | -1.13           | -1.28     | -1.29       | -1.07     | 1.17        | 1.04       | 1.01         | 1.15       | 1.23         | 1.63       | 1.28         |

| ID        | Gene Title                           | Chromosomal Location | 1st Gene Ontology Biological Process       | Pathway                                 | A2497 30 mins | A2497P' 30 mins | A2497 2 h | A2497P' 2 h | A2497 4 h | A2497P' 4 h | A2497 24 h | A2497P' 24 h | A2497 48 h | A2497P' 48 h | A2497 72 h | A2497P' 72 h |
|-----------|--------------------------------------|----------------------|--------------------------------------------|-----------------------------------------|---------------|-----------------|-----------|-------------|-----------|-------------|------------|--------------|------------|--------------|------------|--------------|
| GNRH1     | gonadotropin-releasing hormone       | chr8p21-p11.2        | signal transduction                        | ---                                     | 1.70          | -1.94           | 1.29      | 1.21        | -1.01     | -1.27       | 1.62       | 1.50         | -1.02      | 2.14         | 1.58       | 1.48         |
| GNRHR     | gonadotropin-releasing hormone       | chr4q21.2            | signal transduction                        | GPCRDB_Other // GenMAPP // Peptide G    | -1.75         | 1.04            | 1.69      | 1.92        | -1.18     | 1.64        | -1.31      | 1.02         | -1.10      | -1.93        | -2.59      | -2.15        |
| GNRH2     | gonadotropin-releasing hormone       | chr1q12              | signal transduction                        | ---                                     | -1.09         | -1.09           | -1.17     | -1.22       | 1.04      | 1.09        | -1.21      | -1.20        | -1.66      | -1.19        | -1.23      | 1.01         |
| GNS       | glucosamine (N-acetyl)-6-sulfate     | chr12q14             | carbohydrate metabolic process             | ---                                     | -1.17         | -1.01           | 1.39      | 1.46        | 1.23      | -1.05       | 1.68       | 2.07         | 1.53       | 1.13         | 1.10       | -1.05        |
| GOLGA1    | golgin A1                            | chr9q33.3            | protein targeting to Golgi                 | ---                                     | 1.00          | -1.05           | 1.01      | -1.01       | 1.19      | 1.06        | -1.01      | -1.11        | -2.09      | -2.00        | -1.78      | -1.33        |
| GOLGA1    | golgin A1                            | chr9q33.3            | protein targeting to Golgi                 | ---                                     | -1.03         | -1.20           | 1.02      | -1.06       | 1.03      | -1.03       | -1.22      | -1.17        | -2.15      | -1.87        | -1.36      | -1.31        |
| GOLGA2    | golgin A2                            | chr9q34.11           | mitotic cell cycle                         | ---                                     | 1.09          | -1.05           | 1.12      | 1.03        | -1.12     | 1.09        | 1.04       | 1.11         | 1.52       | 1.75         | 1.64       | 2.15         |
| GOLGA2    | golgin A2                            | chr9q34.11           | mitotic cell cycle                         | ---                                     | 1.66          | 1.55            | 1.45      | 1.16        | 1.11      | -1.21       | -1.10      | -1.66        | 1.70       | 2.17         | 1.56       | 1.58         |
| GOLGA2    | golgin A2                            | chr9q34.11           | mitotic cell cycle                         | ---                                     | 1.30          | 1.12            | 1.42      | 1.02        | 1.01      | -1.14       | 1.51       | 1.16         | 1.64       | 1.36         | 2.96       | 3.33         |
| GOLGA2    | golgin A2                            | chr9q34.11           | mitotic cell cycle                         | ---                                     | -1.00         | 1.03            | 1.03      | -1.18       | -1.09     | 1.01        | -1.22      | 1.07         | 1.28       | 1.50         | 1.80       | 1.63         |
| GOLGA2P5  | golgin A2 pseudogene 5               | chr12q23.1           | 0                                          | ---                                     | 1.26          | 1.13            | 1.18      | 1.21        | 1.27      | -1.05       | -1.10      | 1.08         | -2.18      | -1.73        | -2.08      | -1.76        |
| GOLGA2P5  | golgin A2 pseudogene 5               | chr12q23.1           | 0                                          | ---                                     | -1.85         | -1.86           | -1.13     | -1.03       | 1.34      | 1.19        | -1.13      | -1.39        | -1.35      | -1.46        | -1.60      | -2.06        |
| GOLGA3    | golgin A3                            | chr12q24.33          | intra-Golgi vesicle-mediated transport     | ---                                     | 1.17          | 1.10            | 1.02      | -1.02       | 1.09      | 1.07        | -1.17      | -1.13        | -1.18      | -1.11        | 1.42       | 1.49         |
| GOLGA3    | golgin A3                            | chr12q24.33          | intra-Golgi vesicle-mediated transport     | ---                                     | 1.26          | 1.20            | -1.03     | -1.13       | -1.21     | 1.06        | -1.10      | -1.05        | -1.41      | -1.01        | 1.22       | 1.65         |
| GOLGA4    | golgin A4                            | chr3p22-p21.3        | protein targeting to Golgi                 | ---                                     | 1.24          | -1.02           | -1.31     | -1.10       | 1.14      | -1.01       | -1.14      | -1.26        | 1.33       | 1.28         | 1.49       | 1.17         |
| GOLGA5    | golgin A5                            | chr14q32.12          | retrograde transport, vesicle recycling wi | ---                                     | 1.15          | -1.03           | 1.08      | 1.09        | -1.08     | -1.07       | 1.07       | -1.03        | 1.24       | 1.29         | 1.66       | 1.70         |
| GOLGA6L10 | golgin A6 family-like 10             | chr15q25.2           | retrograde transport, vesicle recycling wi | ---                                     | 1.23          | -1.00           | 1.04      | 1.50        | 1.21      | 1.31        | -1.19      | -1.14        | -1.64      | -1.43        | -1.52      | -1.37        |
| GOLGA7    | golgin A7                            | chr8p11.21           | 0                                          | ---                                     | 1.12          | 1.01            | 1.22      | 1.10        | 1.10      | 1.10        | 1.21       | -1.15        | 1.03       | -1.09        | 1.45       | 1.23         |
| GOLGA7    | golgin A7                            | chr8p11.21           | 0                                          | ---                                     | -1.12         | -1.01           | 1.01      | -1.06       | -1.06     | -1.01       | -1.44      | -1.22        | -1.26      | -1.20        | -1.09      | 1.05         |
| GOLGA8A   | golgin A8 family, member             | chr15q11.2           | 0                                          | ---                                     | 1.36          | 1.21            | 1.11      | 1.38        | 1.27      | 1.10        | 1.22       | 1.00         | -1.51      | -1.52        | -1.60      | -1.26        |
| GOLGA8A   | golgin A8 family, member             | chr15q11.2           | 0                                          | ---                                     | 1.15          | 1.26            | 1.09      | 1.44        | 1.95      | 1.54        | 1.44       | 1.16         | -1.59      | -2.13        | -2.01      | -1.63        |
| GOLGA8A   | golgin A8 family, member             | chr15q11.2           | 0                                          | ---                                     | 1.41          | 1.30            | 1.06      | 1.27        | 1.19      | 1.25        | -1.05      | -1.19        | -1.66      | -1.37        | -1.57      | -1.37        |
| GOLGA8I   | golgin A8 family, member             | chr15q11.2           | 0                                          | ---                                     | 1.67          | 1.38            | 1.29      | 1.32        | 1.10      | 1.27        | -1.32      | -1.21        | 1.17       | 1.09         | -1.02      | -1.02        |
| GOLGB1    | golgin B1                            | chr3q13              | regulation of transcription, DNA-depend    | ---                                     | 1.01          | -1.06           | 1.03      | 1.02        | 1.03      | 1.06        | -1.01      | -1.01        | -1.62      | -1.51        | -1.33      | -1.23        |
| GOLIM4    | golgi integral membrane protein      | chr3q26.2            | transport                                  | ---                                     | -1.11         | -1.31           | -1.02     | 1.08        | 1.14      | -1.03       | 1.04       | 1.63         | -1.63      | -1.25        | -1.44      | -1.12        |
| GOLIM4    | golgi integral membrane protein      | chr3q26.2            | transport                                  | ---                                     | 1.03          | 1.04            | -1.00     | 1.02        | -1.06     | -1.00       | -1.24      | -1.08        | -1.46      | -1.20        | -1.41      | -1.45        |
| GOLM1     | golgi membrane protein 1             | chr9q21.33           | nucleus organization                       | ---                                     | -1.10         | -1.02           | -1.09     | -1.07       | 1.05      | -1.02       | 1.07       | 1.02         | 1.10       | 1.07         | -1.08      | -1.05        |
| GOLPH3L   | golgi phosphoprotein 3-like          | chr1q21.3            | 0                                          | ---                                     | 1.02          | 1.05            | -1.01     | -1.02       | -1.03     | 1.02        | -1.11      | -1.08        | -1.09      | 1.02         | -1.18      | -1.16        |
| GOLT1A    | golgi transport 1A                   | chr1q32.1            | transport                                  | ---                                     | 1.37          | -1.99           | 1.10      | -1.12       | -1.00     | -1.31       | 1.89       | 1.25         | 1.85       | 1.48         | 3.13       | 2.99         |
| GOLT1B    | golgi transport 1B                   | chr12p12.1           | transport                                  | ---                                     | 1.09          | 1.07            | -1.12     | -1.11       | -1.04     | -1.04       | 1.14       | 1.07         | 2.11       | 2.08         | 2.99       | 2.66         |
| GOLT1B    | golgi transport 1B                   | chr12p12.1           | transport                                  | ---                                     | 1.21          | 1.14            | 1.10      | -1.01       | -1.08     | 1.10        | -1.30      | -1.02        | 1.25       | 1.63         | 1.45       | 1.39         |
| GON4L     | gon-4-like (C. elegans)              | chr1q22              | regulation of transcription, DNA-depend    | ---                                     | 1.00          | -1.20           | 1.11      | 1.13        | 1.02      | 1.03        | 1.52       | 1.01         | 1.25       | 1.13         | -1.09      | -1.35        |
| GOPC      | golgi-associated PDZ and c           | chr6q21              | transport                                  | ---                                     | 1.37          | 1.36            | -1.04     | 1.01        | -1.03     | 1.11        | 1.04       | 1.05         | -1.41      | -1.39        | 1.68       | -1.10        |
| GOPC      | golgi-associated PDZ and c           | chr6q21              | transport                                  | ---                                     | -1.07         | -1.05           | -1.03     | -1.29       | -1.09     | -1.10       | 1.01       | 1.03         | 1.01       | -1.35        | 1.03       | 1.12         |
| GOPC      | golgi-associated PDZ and c           | chr6q21              | transport                                  | ---                                     | 1.33          | 1.18            | 1.12      | 1.06        | 1.05      | 1.06        | -1.05      | -1.11        | -1.29      | -1.22        | 1.14       | 1.04         |
| GOPC      | golgi-associated PDZ and c           | chr6q21              | transport                                  | ---                                     | -1.32         | -1.40           | 1.18      | 1.31        | -1.01     | -1.04       | 1.78       | 1.20         | 1.80       | 1.70         | 2.29       | 2.20         |
| GORASP2   | golgi reassembly stacking            | chr2q31.1            | mitotic cell cycle                         | ---                                     | -1.06         | -1.06           | -1.02     | -1.02       | -1.00     | 1.04        | -1.03      | -1.04        | 1.35       | 1.33         | 1.27       | 1.38         |
| GORASP2   | golgi reassembly stacking            | chr2q31.1            | mitotic cell cycle                         | ---                                     | 1.01          | 1.02            | -1.09     | -1.03       | -1.15     | 1.07        | -1.09      | 1.02         | 1.01       | 1.15         | 1.07       | 1.19         |
| GORASP2   | golgi reassembly stacking            | chr2q31.1            | mitotic cell cycle                         | ---                                     | -1.09         | -1.08           | 1.05      | 1.09        | 1.09      | 1.01        | 1.02       | -1.04        | 1.39       | 1.31         | 1.44       | 1.54         |
| GOSR1     | golgi SNAP receptor complex          | chr17q11             | transport                                  | ---                                     | 1.03          | 1.08            | 1.14      | -1.02       | 1.11      | -1.01       | -1.13      | -1.35        | -1.45      | -1.40        | 1.18       | 1.08         |
| GOSR1     | golgi SNAP receptor complex          | chr17q11             | transport                                  | ---                                     | -1.21         | -1.19           | 1.10      | 1.03        | 1.11      | 1.06        | 1.10       | 1.09         | -1.02      | 1.01         | 1.40       | 1.58         |
| GOSR2     | golgi SNAP receptor complex          | chr17q21             | transport                                  | ---                                     | -1.58         | -1.79           | 1.21      | 1.29        | 1.19      | 1.07        | -1.46      | -1.13        | -1.26      | 1.13         | -1.17      | 1.06         |
| GOSR2     | golgi SNAP receptor complex          | chr17q21             | transport                                  | ---                                     | -1.18         | -1.26           | 1.01      | 1.06        | -1.06     | 1.09        | -1.06      | 1.02         | -1.09      | -1.11        | 1.12       | 1.39         |
| GOSR2     | golgi SNAP receptor complex          | chr17q21             | transport                                  | ---                                     | -1.02         | -1.02           | 1.09      | 1.07        | 1.12      | -1.01       | -1.04      | -1.09        | 1.24       | 1.21         | 2.10       | 2.36         |
| GOSR2     | golgi SNAP receptor complex          | chr17q21             | transport                                  | ---                                     | 1.15          | 1.21            | 1.04      | -1.05       | 1.24      | 1.03        | 1.73       | 1.18         | 4.20       | 2.92         | 4.25       | 4.03         |
| GOSR2     | golgi SNAP receptor complex          | chr17q21             | transport                                  | ---                                     | 1.31          | 1.29            | 1.03      | 1.02        | 1.19      | 1.15        | 1.42       | 1.42         | 1.42       | 1.42         | 2.20       | 1.92         |
| GOSR2     | golgi SNAP receptor complex          | chr17q21             | transport                                  | ---                                     | 1.43          | -1.35           | 1.07      | 1.19        | 1.23      | 1.02        | 1.00       | 1.24         | 6.39       | 4.29         | 4.97       | 5.12         |
| GOT1      | glutamic-oxaloacetic transaminase    | chr10q24.1-q25.1     | sulfur amino acid metabolic process        | Glycolysis_and_Gluconeogenesis // GenMA | -1.03         | -1.05           | -1.01     | 1.05        | 1.08      | -1.05       | 1.02       | 1.01         | 1.25       | 1.19         | 1.46       | 1.46         |
| GPIBB     | glycoprotein Ib (platelet), beta     | chr22q11             | cytokinesis                                | ---                                     | -1.06         | 1.12            | 1.17      | -1.08       | -1.13     | 1.10        | 1.05       | 1.20         | 1.07       | 1.00         | -2.11      | -1.40        |
| GPAM      | glycerol-3-phosphate acyltransferase | chr10q25.2           | lipid metabolic process                    | ---                                     | 1.06          | 1.06            | -1.00     | 1.09        | 1.14      | 1.18        | -1.60      | -1.40        | -1.48      | -1.26        | -1.20      | -1.16        |
| GPATCH2   | G patch domain containing            | chr1q41              | negative regulation of phosphatase activi  | ---                                     | -1.07         | 1.03            | -1.03     | -1.17       | -1.14     | -1.16       | -1.61      | 1.07         | -2.52      | -2.15        | -1.46      | -2.46        |
| GPATCH2   | G patch domain containing            | chr1q41              | negative regulation of phosphatase activi  | ---                                     | 1.15          | 1.26            | 1.00      | -1.05       | -1.07     | 1.06        | -1.10      | -1.04        | -1.82      | -1.01        | -1.78      | -1.78        |
| GPATCH2   | G patch domain containing            | chr1q41              | negative regulation of phosphatase activi  | ---                                     | -1.27         | -1.07           | -1.28     | -1.33       | -1.36     | -1.10       | -1.35      | 1.24         | -2.26      | -2.10        | -1.50      | -2.20        |
| GPATCH2L  | G patch domain containing            | chr14q24.3           | 0                                          | ---                                     | 1.14          | -1.12           | 1.03      | -1.02       | -1.10     | -1.03       | -1.34      | -1.31        | -1.25      | -1.13        | 1.27       | 1.46         |
| GPATCH2L  | G patch domain containing            | chr14q24.3           | 0                                          | ---                                     | -1.12         | -1.11           | 1.23      | 1.46        | 1.11      | 1.04        | -1.05      | 1.17         | 1.12       | 1.36         | 1.32       | 1.59         |
| GPATCH2L  | G patch domain containing            | chr14q24.3           | 0                                          | ---                                     | -1.01         | 1.27            | 1.33      | 1.15        | -1.33     | -1.04       | -1.11      | 1.14         | 2.25       | 2.00         | 3.34       | 3.67         |
| GPATCH2L  | G patch domain containing            | chr14q24.3           | 0                                          | ---                                     | -1.06         | -1.32           | 1.44      | 1.51        | 1.14      | -1.43       | 1.10       | 1.19         | 1.17       | 1.03         | 1.91       | 1.60         |
| GPATCH2L  | G patch domain containing            | chr14q24.3           | 0                                          | ---                                     | 1.44          | 1.30            | 1.30      | 1.24        | 1.22      | 1.23        | 1.52       | 1.67         | 1.36       | 1.30         | 1.06       | 1.06         |
| GPATCH8   | G patch domain containing            | chr17q21.31          | 0                                          | ---                                     | -1.09         | -1.08           | -1.00     | -1.04       | -1.04     | -1.07       | 1.04       | -1.01        | 1.14       | 1.30         | 1.42       | 1.13         |
| GPATCH8   | G patch domain containing            | chr17q21.31          | 0                                          | ---                                     | -1.10         | -1.14           | -1.01     | -1.00       | 1.15      | -1.06       | 1.01       | -1.00        | 1.55       | 1.39         | 1.48       | 1.66         |
| GPBP1     | GC-rich promoter binding             | chr5q11.2            | transcription, DNA-dependent               | ---                                     | 1.05          | 1.09            | -1.05     | -1.03       | -1.03     | -1.04       | 1.06       | 1.01         | -1.07      | 1.03         | 1.14       | 1.14         |
| GPBP1     | GC-rich promoter binding             | chr5q11.2            | transcription, DNA-dependent               | ---                                     | 1.07          | 1.00            | 1.01      | 1.15        | -1.05     | 1.05        | -1.26      | -1.16        | -1.46      | -1.35        | -1.30      | -1.28        |
| GPBP1L1   | GC-rich promoter binding             | chr1p34.1            | transcription, DNA-dependent               | ---                                     | 1.13          | 1.04            | -1.01     | 1.18        | -1.18     | -1.19       | -1.06      | -1.07        | 1.04       | -1.07        | 1.44       | 1.49         |
| GPC1      | glypican 1                           | chr2q35-q37          | retinoid metabolic process                 | ---                                     | 1.14          | 1.04            | 1.04      | 1.14        | -1.13     | -1.26       | 1.43       | 1.38         | 1.71       | 1.61         | 1.67       | 2.27         |
| GPC1      | glypican 1                           | chr2q35-q37          | retinoid metabolic process                 | ---                                     | 1.09          | -1.03           | 1.02      | 1.27        | -1.01     | -1.15       | 1.27       | 1.29         | 1.99       | 1.46         | 1.66       | 1.86         |
| GPC2      | glypican 2                           | chr7q22.1            | retinoid metabolic process                 | ---                                     | -1.06         | -1.10           | 1.02      | 1.32        | -1.12     | -1.24       | -1.28      | 1.15         | 1.53       | 2.06         | 1.87       | 2.08         |

| ID          | Gene Title                                    | Chromosomal Location     | 1st Gene Ontology Biological Process                              | Pathway                                        | A2497 30 mins | A2497P' 30 mins | A2497 2 h | A2497P' 2 h | A2497 4 h | A2497P' 4 h | A2497 24 h | A2497P' 24 h | A2497 48 h | A2497P' 48 h | A2497 72 h | A2497P' 72 h |
|-------------|-----------------------------------------------|--------------------------|-------------------------------------------------------------------|------------------------------------------------|---------------|-----------------|-----------|-------------|-----------|-------------|------------|--------------|------------|--------------|------------|--------------|
| GPC4        | glypican 4                                    | chrXq26.1                | retinoid metabolic process                                        | ---                                            | -1.77         | 1.58            | 3.43      | 2.88        | -2.19     | 1.32        | 1.40       | -1.04        | -1.38      | -1.77        | -1.90      | -2.68        |
| GPC5        | glypican 5                                    | chr13q32                 | retinoid metabolic process                                        | ---                                            | -1.21         | 1.00            | -1.01     | 1.10        | 1.08      | -1.02       | 1.30       | 1.33         | 1.26       | 1.13         | -1.20      | 1.09         |
| GPCPD1      | glycerophosphocholine phosphatase             | chr20p12.3               | glycerol metabolic process                                        | ---                                            | 1.14          | 1.03            | 1.15      | 1.39        | -1.03     | 1.02        | 1.17       | -1.19        | 1.31       | 1.63         | 1.98       | 1.42         |
| GPDL1       | glycerol-3-phosphate dehydrogenase            | chr3p22.3                | regulation of heart rate                                          | ---                                            | 1.02          | 1.11            | 1.08      | -1.16       | 1.07      | 1.03        | -1.06      | 1.00         | -1.13      | -1.08        | -1.13      | -1.22        |
| GPDL2       | glycerol-3-phosphate dehydrogenase            | chr2q24.1                | glycerol-3-phosphate metabolic process                            | Fatty_Acid_Degradation // GenMAPP              | -1.03         | -1.08           | -1.01     | 1.05        | 1.07      | 1.05        | -1.00      | -1.04        | 1.10       | 1.23         | -1.13      | -1.08        |
| GPDR        | G protein-coupled estrogen receptor           | chr7p22.3                | positive regulation of protein phosphorylation                    | GPCRDB_Class_A_Rhodopsin-like // GenMAPP       | -1.31         | -1.56           | -1.22     | -1.12       | -1.02     | 1.10        | 1.13       | 1.22         | -5.19      | -1.66        | 1.17       | -2.65        |
| GPDR        | G protein-coupled estrogen receptor           | chr7p22.3                | positive regulation of protein phosphorylation                    | GPCRDB_Class_A_Rhodopsin-like // GenMAPP       | -1.06         | -1.15           | 1.08      | 1.08        | -1.06     | -1.34       | -1.38      | -1.16        | -1.65      | -2.43        | -2.19      | -2.54        |
| GPDR        | G protein-coupled estrogen receptor           | chr14q23.3               | vitamin metabolic process                                         | ---                                            | -1.06         | -1.05           | 1.01      | 1.04        | -1.01     | -1.09       | -1.03      | -1.07        | -1.55      | -1.28        | -1.66      | -1.63        |
| GPDR        | G protein-coupled estrogen receptor           | chr14q23.3               | vitamin metabolic process                                         | ---                                            | 1.04          | 1.05            | 1.03      | -1.02       | 1.15      | 1.08        | 1.00       | -1.22        | -1.21      | -1.14        | -1.32      | -1.55        |
| GPI         | glucose-6-phosphate isomerase                 | chr19q13.1               | angiogenesis                                                      | Glycolysis_and_Gluconeogenesis // GenMAPP      | -1.06         | -1.01           | -1.01     | -1.01       | -1.03     | -1.01       | 1.16       | 1.03         | 1.47       | 1.29         | 1.44       | 1.69         |
| GPLOW       | G patch domain and KOW domain protein         | chrXp11.23               | 0                                                                 | ---                                            | -1.08         | -1.18           | -1.11     | -1.02       | -1.04     | -1.09       | 1.06       | 1.15         | 1.33       | 1.38         | 1.25       | 1.39         |
| GPLD1       | glycosylphosphatidylinositol transfer protein | chr6p22.1                | ossification                                                      | ---                                            | 1.09          | 1.02            | 1.04      | 1.18        | -1.17     | -1.11       | -1.16      | -1.15        | -1.63      | -2.15        | -2.83      | -3.68        |
| GPM6B       | glycoprotein M6B                              | chrXp22.2                | ossification                                                      | ---                                            | 1.01          | 1.08            | 1.14      | 1.16        | -1.22     | -1.05       | -1.23      | 1.00         | -1.04      | 1.10         | -1.61      | -1.95        |
| GPM6B       | glycoprotein M6B                              | chrXp22.2                | ossification                                                      | ---                                            | 1.07          | -1.03           | -1.46     | -1.35       | 1.53      | 1.60        | 1.07       | 1.67         | -1.63      | -1.11        | -1.61      | -1.48        |
| GPM6B       | glycoprotein M6B                              | chrXp22.2                | ossification                                                      | ---                                            | -1.05         | 1.19            | -1.02     | -1.14       | -1.11     | -1.05       | -1.40      | -1.34        | -1.57      | -1.28        | -1.78      | -1.94        |
| GPN1        | GPN-loop GTPase 1                             | chr2p23.3                | 0                                                                 | ---                                            | -1.02         | -1.08           | -1.02     | 1.06        | 1.00      | -1.03       | 1.06       | -1.02        | 1.19       | 1.15         | 1.10       | 1.26         |
| GPNMB       | glycoprotein (transmembrane protein)          | chr7p15                  | osteoblast differentiation                                        | ---                                            | -1.03         | 1.02            | 1.06      | 1.03        | 1.03      | 1.02        | -1.23      | -1.33        | -1.68      | -1.27        | -1.26      | 1.02         |
| GPR107      | G protein-coupled receptor                    | chr9q34.11               | 0                                                                 | ---                                            | -1.02         | -1.01           | -1.01     | 1.15        | -1.02     | 1.08        | 1.10       | 1.16         | 1.44       | 1.58         | -1.10      | -1.21        |
| GPR107      | G protein-coupled receptor                    | chr9q34.11               | G-protein coupled receptor signaling pathway                      | ---                                            | -1.19         | -1.17           | 1.17      | 1.19        | 1.15      | -1.02       | 1.04       | 1.07         | 1.12       | 1.06         | 1.13       | 1.26         |
| GPR107      | G protein-coupled receptor                    | chr9q34.11               | G-protein coupled receptor signaling pathway                      | ---                                            | -1.00         | 1.04            | 1.12      | 1.06        | 1.23      | 1.01        | 1.25       | 1.12         | 1.49       | 1.30         | 1.88       | 1.89         |
| GPR107      | G protein-coupled receptor                    | chr9q34.11               | 0                                                                 | ---                                            | 1.10          | 1.04            | 1.10      | 1.23        | 1.07      | 1.15        | -1.03      | -1.04        | 1.31       | 1.46         | -1.35      | -1.20        |
| GPR124      | G protein-coupled receptor                    | chr8p11.23               | angiogenesis                                                      | ---                                            | 1.03          | 1.09            | -1.06     | 1.09        | 1.01      | -1.00       | 1.00       | 1.21         | -1.08      | -1.03        | 1.05       | 1.32         |
| GPR125      | G protein-coupled receptor                    | chr4p15.2                | regulation of cell growth                                         | ---                                            | 1.14          | 1.12            | 1.06      | -1.11       | -1.16     | -1.04       | -1.35      | -1.16        | -2.07      | -1.97        | -1.54      | -2.01        |
| GPR126      | G protein-coupled receptor                    | chr6q24.1                | signal transduction                                               | ---                                            | 1.09          | -1.00           | 1.01      | -1.06       | 1.08      | 1.12        | 1.42       | 1.20         | 1.47       | 1.27         | 1.11       | -1.24        |
| GPR135      | G protein-coupled receptor                    | chr14q23.1               | signal transduction                                               | GPCRDB_Other // GenMAPP                        | 1.04          | -1.41           | 2.01      | 2.33        | 1.32      | -1.38       | -1.20      | 1.12         | -2.10      | -1.34        | 1.31       | 1.97         |
| GPR137B     | G protein-coupled receptor                    | chr1q42-q43              | 0                                                                 | ---                                            | -1.03         | -1.29           | -1.05     | -1.03       | -1.11     | -1.03       | -1.15      | -1.02        | -1.45      | -1.17        | -1.03      | -1.06        |
| GPR143      | G protein-coupled receptor                    | chrXp22.3                | eye pigment biosynthetic process                                  | GPCRDB_Other // GenMAPP                        | 1.74          | 1.10            | -1.74     | -1.46       | 1.36      | 1.12        | -2.02      | 1.02         | -16.29     | -2.01        | -5.07      | -3.45        |
| GPR146      | G protein-coupled receptor                    | chr7p22.3                | signal transduction                                               | ---                                            | -1.08         | -1.14           | 1.01      | 1.28        | 1.03      | -1.13       | 1.92       | 1.33         | -1.06      | 1.66         | 3.50       | 4.35         |
| GPR153      | G protein-coupled receptor                    | chr1p36.31               | signal transduction                                               | ---                                            | 2.21          | 2.29            | 1.55      | 1.28        | 1.68      | 2.03        | 1.12       | 1.17         | -1.24      | 2.03         | -1.27      | 1.36         |
| GPR155      | G protein-coupled receptor                    | chr2q31.1                | intracellular signal transduction                                 | ---                                            | -1.41         | -1.28           | 1.12      | 1.01        | 1.43      | 1.28        | 1.28       | -1.08        | 1.10       | 1.35         | 1.16       | 1.36         |
| GPR155      | G protein-coupled receptor                    | chr2q31.1                | intracellular signal transduction                                 | ---                                            | -1.06         | -1.59           | -1.42     | -1.52       | -1.00     | 1.29        | -1.14      | -1.08        | 1.19       | 1.54         | -1.17      | -1.00        |
| GPR157      | G protein-coupled receptor                    | chr1p36.23               | signal transduction                                               | ---                                            | 1.08          | 1.12            | 1.16      | -1.03       | 1.22      | 1.03        | 1.13       | -1.15        | 1.49       | 1.37         | 1.81       | 1.74         |
| GPR160      | G protein-coupled receptor                    | chr3q26.2-q27            | signal transduction                                               | ---                                            | 1.05          | -1.06           | 1.18      | 1.10        | 1.16      | 1.19        | -1.02      | -1.04        | 1.37       | 1.82         | 1.19       | 1.18         |
| GPR161      | G protein-coupled receptor                    | chr1q24.2                | signal transduction                                               | GPCRDB_Class_A_Rhodopsin-like2 // GenMAPP      | -1.16         | -1.08           | 1.43      | 1.20        | 1.03      | 1.17        | 1.19       | 1.09         | -1.71      | -1.43        | -1.48      | -2.33        |
| GPR161      | G protein-coupled receptor                    | chr1q24.2                | signal transduction                                               | GPCRDB_Class_A_Rhodopsin-like2 // GenMAPP      | -1.33         | -1.31           | -1.04     | -1.20       | 1.04      | 1.01        | -1.07      | 1.21         | -2.39      | -1.85        | -1.83      | -2.22        |
| GPR161      | G protein-coupled receptor                    | chr1q24.2                | signal transduction                                               | GPCRDB_Class_A_Rhodopsin-like2 // GenMAPP      | 1.33          | 1.16            | 1.16      | -1.03       | -1.14     | -1.33       | 1.30       | 1.39         | -1.60      | -1.88        | -1.43      | -1.48        |
| GPR173      | G protein-coupled receptor                    | chrXp11                  | signal transduction                                               | GPCRDB_Class_A_Rhodopsin-like // GenMAPP       | 1.90          | 1.62            | -1.44     | -1.49       | -1.96     | -1.04       | 1.33       | -1.17        | -1.69      | -1.00        | -1.92      | -1.31        |
| GPR173      | G protein-coupled receptor                    | chrXp11                  | signal transduction                                               | GPCRDB_Class_A_Rhodopsin-like // GenMAPP       | -1.10         | -1.14           | 1.09      | 1.08        | -1.10     | 1.04        | -1.18      | 1.10         | -1.72      | -1.34        | -1.61      | -1.32        |
| GPR173      | G protein-coupled receptor                    | chrXp11                  | signal transduction                                               | GPCRDB_Class_A_Rhodopsin-like // GenMAPP       | 1.21          | -1.55           | -1.00     | 1.21        | 1.56      | -1.12       | -1.28      | -1.06        | -3.06      | -2.69        | -1.41      | -1.33        |
| GPR173      | G protein-coupled receptor                    | chrXp11                  | signal transduction                                               | GPCRDB_Class_A_Rhodopsin-like // GenMAPP       | -1.98         | 1.30            | 1.29      | 2.54        | 2.00      | 2.02        | 1.39       | 1.71         | -1.66      | -1.15        | -1.60      | -1.12        |
| GPR176      | G protein-coupled receptor                    | chr15q14-q15.1           | signal transduction                                               | GPCRDB_Other // GenMAPP                        | 1.14          | 1.04            | 1.00      | -1.05       | 1.02      | 1.14        | 1.04       | 1.02         | -1.10      | -1.07        | 1.13       | -1.04        |
| GPR180      | G protein-coupled receptor                    | chr13q32.1               | G-protein coupled receptor signaling pathway                      | ---                                            | -1.10         | 1.27            | 1.56      | 1.18        | -1.30     | -1.59       | -2.24      | -1.02        | 1.34       | 1.79         | 1.30       | 1.65         |
| GPR180      | G protein-coupled receptor                    | chr13q32.1               | G-protein coupled receptor signaling pathway                      | ---                                            | 1.42          | 1.45            | -1.09     | -1.17       | -1.63     | -1.07       | -2.14      | -1.57        | -1.32      | -1.28        | -1.85      | -2.16        |
| GPR180      | G protein-coupled receptor                    | chr13q32.1               | G-protein coupled receptor signaling pathway                      | ---                                            | 1.53          | 1.53            | 1.13      | -1.20       | -1.39     | -1.09       | -2.46      | -1.28        | -1.49      | -1.33        | -2.04      | -2.57        |
| GPR180      | G protein-coupled receptor                    | chr13q32.1               | G-protein coupled receptor signaling pathway                      | ---                                            | 1.12          | 1.12            | -1.63     | -2.34       | 7.46      | 6.17        | -1.04      | 1.40         | 5.54       | 2.66         | 3.97       | 2.98         |
| GPR183      | G protein-coupled receptor                    | chr13q32.3               | mature B cell differentiation involved in humoral immune response | GPCRDB_Other // GenMAPP                        | -1.08         | 1.04            | -1.01     | 1.05        | -1.01     | -1.06       | 1.18       | 1.11         | -1.11      | -1.40        | -1.50      | -1.97        |
| GPR22       | G protein-coupled receptor                    | chr7q22-q31.1            | G-protein coupled receptor signaling pathway                      | ---                                            | 1.48          | 1.93            | -1.71     | 1.39        | 2.44      | -1.02       | 16.14      | 5.08         | 1.29       | 1.12         | -1.20      | -1.51        |
| GPR27       | G protein-coupled receptor                    | chr3p21-p14              | signal transduction                                               | GPCRDB_Class_A_Rhodopsin-like // GenMAPP       | -1.08         | 1.22            | 1.25      | 1.22        | -1.92     | -1.08       | -1.49      | -1.76        | 1.43       | 1.31         | 1.06       | 1.09         |
| GPR3        | G protein-coupled receptor                    | chr1p36.1-p35            | signal transduction                                               | GPCRDB_Class_A_Rhodopsin-like // GenMAPP       | -2.32         | -3.67           | 1.14      | 1.23        | -1.11     | 1.45        | -1.00      | -2.33        | 2.09       | 1.61         | 3.11       | 3.19         |
| GPR37 // SE | G protein-coupled receptor                    | chr20p12.1 // chr7q31.31 | signal transduction                                               | GPCRDB_Class_A_Rhodopsin-like // GenMAPP       | 1.11          | 1.18            | 1.08      | -1.04       | 1.12      | 1.07        | -1.30      | -1.14        | -1.31      | -1.13        | -1.24      | -1.44        |
| GPR39       | G protein-coupled receptor                    | chr2q21-q22              | signal transduction                                               | GPCRDB_Class_A_Rhodopsin-like2 // GenMAPP      | -1.29         | -1.27           | 1.11      | 1.03        | 1.10      | -1.02       | 1.29       | 1.04         | 1.26       | 1.16         | 1.72       | 1.83         |
| GPR39       | G protein-coupled receptor                    | chr2q21-q22              | signal transduction                                               | GPCRDB_Class_A_Rhodopsin-like2 // GenMAPP      | -1.08         | -1.17           | 1.07      | 1.16        | 1.22      | 1.09        | -1.07      | -1.05        | 1.02       | -1.07        | 1.62       | 1.36         |
| GPR56       | G protein-coupled receptor                    | chr16q13                 | angiogenesis                                                      | GPCRDB_Other // GenMAPP                        | -1.05         | -1.05           | 1.02      | 1.05        | 1.01      | -1.03       | -1.01      | -1.06        | -1.15      | -1.04        | -1.64      | -1.45        |
| GPR64       | G protein-coupled receptor                    | chrXp22.13               | signal transduction                                               | GPCRDB_Class_B_Secretin-like // GenMAPP        | 1.14          | 1.16            | -1.02     | -1.07       | -1.10     | -1.03       | -1.04      | -1.04        | -1.79      | -1.49        | -2.04      | -2.33        |
| GPR82       | G protein-coupled receptor                    | chrXp11.4                | signal transduction                                               | ---                                            | 1.15          | -1.23           | -3.04     | -1.83       | -1.62     | -2.93       | -4.21      | 1.01         | 1.28       | -1.10        | -1.57      | 2.04         |
| GPR85       | G protein-coupled receptor                    | chr7q31                  | signal transduction                                               | GPCRDB_Class_A_Rhodopsin-like // GenMAPP       | 1.83          | 1.59            | -1.04     | -1.49       | -1.05     | -2.20       | -1.80      | -2.07        | 8.90       | 12.58        | 6.81       | 15.54        |
| GPR87       | G protein-coupled receptor                    | chr3q24                  | signal transduction                                               | GPCRDB_Class_A_Rhodopsin-like // GenMAPP       | -1.06         | -1.03           | 1.06      | 1.00        | -1.03     | -1.06       | -1.23      | -1.14        | -1.90      | -1.52        | -2.53      | -2.01        |
| GPR88       | G protein-coupled receptor                    | chr1p21.3                | signal transduction                                               | GPCRDB_Other // GenMAPP                        | 3.97          | 2.76            | 1.41      | -1.07       | 1.42      | 1.02        | 1.91       | 4.38         | 3.44       | 2.05         | -1.25      | -1.11        |
| GPR89A // G | G protein-coupled receptor                    | chr1q21.1                | transport                                                         | ---                                            | -1.16         | -1.15           | 1.04      | -1.02       | 1.19      | 1.06        | 1.23       | 1.14         | 1.15       | -1.02        | 1.21       | 1.24         |
| GPR97       | G protein-coupled receptor                    | chr16q21                 | signal transduction                                               | ---                                            | 2.36          | 2.99            | -1.02     | 1.36        | -2.29     | -1.78       | 1.11       | 1.73         | 16.44      | 6.48         | 8.73       | 3.21         |
| GPR97       | G protein-coupled receptor                    | chr16q21                 | signal transduction                                               | ---                                            | -1.78         | 1.41            | -1.89     | 1.41        | 2.29      | -1.33       | 1.34       | 1.45         | 1.04       | 1.42         | 3.92       | 3.64         |
| GPR98       | G protein-coupled receptor                    | chr5q13                  | cell communication                                                | GPCRDB_Other // GenMAPP                        | 1.02          | -1.98           | 1.70      | -1.03       | -1.44     | 1.24        | 2.54       | 4.00         | 4.08       | 6.22         | -10.12     | -1.35        |
| GPR98       | G protein-coupled receptor                    | chr5q13                  | cell communication                                                | GPCRDB_Other // GenMAPP                        | 6.44          | 11.86           | -7.76     | -2.73       | -6.13     | -1.32       | 2.05       | 4.67         | 3.05       | -1.26        | -1.24      | 1.91         |
| GPCR5A      | G protein-coupled receptor                    | chr12p13-p12.3           | signal transduction                                               | GPCRDB_Class_C_Metabotropic glutamate receptor | -1.08         | -1.07           | -1.09     | -1.01       | 1.07      | -1.00       | 1.43       | 1.19         | 1.66       | 1.51         | 1.25       | 1.31         |
| GPCR5A      | G protein-coupled receptor                    | chr12p13-p12.3           | signal transduction                                               | GPCRDB_Class_C_Metabotropic glutamate receptor | -1.09         | -1.07           | 1.01      | 1.05        | 1.09      | -1.01       | 1.50       | 1.22         | 2.10       | 1.78         | 1.70       | 1.77         |
| GPCR5B      | G protein-coupled receptor                    | chr16p12                 | signal transduction                                               | GPCRDB_Class_C_Metabotropic glutamate receptor | -1.16         | 1.00            | -1.18     | -1.19       | 1.07      | -1.00       | -1.15      | -1.02        | 1.52       | 1.16         | 1.68       | 1.49         |

| ID         | Gene Title                                           | Chromosomal Location | 1st Gene Ontology Biological Process          | Pathway                                   | A2497 30 mins | A2497P' 30 mins | A2497 2 h | A2497P' 2 h | A2497 4 h | A2497P' 4 h | A2497 24 h | A2497P' 24 h | A2497 48 h | A2497P' 48 h | A2497 72 h | A2497P' 72 h |
|------------|------------------------------------------------------|----------------------|-----------------------------------------------|-------------------------------------------|---------------|-----------------|-----------|-------------|-----------|-------------|------------|--------------|------------|--------------|------------|--------------|
| GPRCSC     | G protein-coupled receptor                           | chr17q25             | signal transduction                           | GPCRDB_Class_C_Metabotropic glutamate     | -1.09         | -1.05           | 1.08      | 1.04        | 1.46      | 1.27        | -1.29      | -1.13        | 2.54       | 2.28         | 2.37       | 2.62         |
| GPRIN2     | G protein regulated inducer                          | chr16q11.22          | 0                                             | ---                                       | -1.13         | 1.05            | 1.03      | -1.11       | -1.44     | -1.03       | 1.34       | 1.20         | -2.35      | -1.24        | -1.86      | -1.48        |
| GPS2       | G protein pathway suppressor                         | chr17p13             | negative regulation of transcription from     | ---                                       | -1.17         | -1.12           | 1.03      | 1.14        | 1.05      | -1.13       | 1.11       | 1.04         | -1.53      | -1.65        | -1.53      | -1.59        |
| GPSM1      | G-protein signaling modulator                        | chr9q34.3            | signal transduction                           | ---                                       | 1.34          | 1.37            | -1.07     | 1.21        | 1.02      | -1.00       | 1.05       | -1.02        | 1.23       | 1.14         | 1.30       | 1.45         |
| GPSM2      | G-protein signaling modulator                        | chr1p13.3            | establishment of mitotic spindle orientation  | ---                                       | -1.00         | -1.22           | -1.17     | -1.06       | 1.14      | 1.21        | -1.34      | -1.10        | -1.22      | 1.13         | 1.17       | 1.41         |
| GPSM2      | G-protein signaling modulator                        | chr1p13.3            | establishment of mitotic spindle orientation  | ---                                       | -1.06         | 1.02            | 1.01      | -1.10       | 1.07      | -1.05       | -1.13      | -1.06        | 1.43       | 1.38         | 1.70       | 1.83         |
| GPT2       | glutamic pyruvate transaminase                       | chr16q12.1           | 2-oxoglutarate metabolic process              | ---                                       | -1.12         | -1.28           | 1.25      | 1.17        | 1.16      | -1.05       | 1.34       | 1.27         | 1.68       | 1.90         | -1.17      | 1.05         |
| GPX1       | glutathione peroxidase 1                             | chr3p21.3            | response to reactive oxygen species           | ---                                       | -1.11         | -1.06           | 1.04      | 1.11        | 1.04      | -1.12       | 1.11       | 1.06         | 1.61       | 1.24         | 1.36       | 1.35         |
| GPX3       | glutathione peroxidase 3 (plasma)                    | chr5q23              | response to molecule of fungal origin         | ---                                       | 1.20          | -1.07           | 1.05      | 1.14        | 1.36      | 1.99        | 1.12       | -1.49        | 1.06       | 1.92         | 1.60       | 2.29         |
| GPX3       | glutathione peroxidase 3 (plasma)                    | chr5q23              | response to molecule of fungal origin         | ---                                       | -1.28         | 1.07            | -1.11     | -1.66       | 1.61      | 1.14        | -1.25      | -1.30        | 1.08       | -1.19        | 1.62       | 1.86         |
| GPX5       | glutathione peroxidase 5 (cytosolic)                 | chr6p22.1            | lipid metabolic process                       | ---                                       | -1.44         | 2.71            | 1.41      | 1.15        | 7.87      | 10.04       | 4.33       | -1.33        | 3.39       | 2.35         | -1.87      | ---          |
| GRAMD1A    | GRAM domain containing                               | chr19q13.13          | 0                                             | ---                                       | -1.15         | -1.50           | 1.27      | 1.26        | 1.11      | -1.13       | -1.24      | -1.35        | 1.72       | 1.20         | -1.34      | -1.18        |
| GRAMD1A    | GRAM domain containing                               | chr19q13.13          | 0                                             | ---                                       | 1.06          | -1.01           | 1.18      | 1.07        | 1.21      | 1.23        | 1.23       | 1.10         | 1.44       | 1.36         | 1.32       | 1.34         |
| GRAMD1B    | GRAM domain containing                               | chr11q24.1           | 0                                             | ---                                       | -1.20         | -1.12           | 1.06      | -1.01       | 1.05      | 1.04        | 1.31       | 1.11         | 2.34       | 2.05         | 2.07       | 2.20         |
| GRAMD1C    | GRAM domain containing                               | chr3q13.31           | 0                                             | ---                                       | 1.06          | -1.01           | 1.07      | -2.47       | 1.45      | 1.74        | 1.21       | -1.07        | 1.16       | 1.83         | 2.70       | 2.09         |
| GRAMD2     | GRAM domain containing                               | chr15q23             | 0                                             | ---                                       | 1.00          | -1.86           | 1.08      | 1.19        | -1.42     | 1.40        | -2.18      | -1.69        | -1.31      | -1.39        | -1.54      | -2.16        |
| GRAMD3     | GRAM domain containing                               | chr5q23.2            | 0                                             | ---                                       | 1.04          | -1.04           | -1.12     | -1.08       | 1.02      | -1.03       | 1.01       | -1.02        | -1.23      | -1.41        | 1.56       | 1.13         |
| GRAPL      | GRB2-related adaptor protein                         | chr17p11.2           | 0                                             | ---                                       | -1.39         | -4.13           | -3.73     | 1.77        | -2.75     | -1.29       | -2.71      | -1.54        | 5.73       | 4.56         | 1.03       | 1.46         |
| GRB10      | growth factor receptor-bound protein                 | chr7p12.2            | signal transduction                           | ---                                       | -1.04         | -1.15           | 1.21      | 1.18        | -1.07     | -1.11       | 1.85       | 1.26         | 4.46       | 4.91         | 2.75       | 4.13         |
| GRB10      | growth factor receptor-bound protein                 | chr7p12.2            | signal transduction                           | ---                                       | 1.01          | -1.12           | 1.03      | 1.10        | -1.07     | -1.09       | 1.95       | 1.52         | 4.73       | 4.43         | 3.07       | 4.59         |
| GRB10      | growth factor receptor-bound protein                 | chr7p12.2            | signal transduction                           | ---                                       | 1.01          | -1.06           | -1.02     | -1.01       | -1.16     | 1.01        | -1.08      | -1.12        | 1.24       | 1.40         | 1.25       | 1.48         |
| GRB2       | growth factor receptor-bound protein                 | chr17q24-q25         | epidermal growth factor receptor signaling    | Integrin-mediated_cell_adhesion_KEGG_//C  | 1.06          | 1.09            | -1.01     | -1.00       | -1.08     | -1.07       | 1.06       | 1.01         | 1.17       | 1.16         | 1.22       | 1.12         |
| GRB7       | growth factor receptor-bound protein                 | chr17q12             | signal transduction                           | ---                                       | -1.09         | -1.31           | -1.08     | 1.01        | -1.11     | -1.00       | -1.13      | -1.08        | 1.24       | -1.05        | 1.35       | 1.28         |
| GREB1L     | growth regulation by estradiol                       | chr18q11.2           | 0                                             | ---                                       | 1.39          | 1.33            | -1.11     | 1.07        | 1.35      | -1.02       | 1.63       | 1.41         | 1.31       | -1.07        | -2.35      | -1.95        |
| GREM1      | gremlin 1, DAN family BMP inhibitor                  | chr15q13.3           | cell morphogenesis                            | ---                                       | 1.26          | 1.28            | 1.06      | -1.12       | -1.02     | 1.04        | 1.18       | -1.04        | -1.84      | -1.80        | 1.06       | -1.65        |
| GREM1      | gremlin 1, DAN family BMP inhibitor                  | chr15q13.3           | cell morphogenesis                            | ---                                       | 1.01          | 1.06            | -1.08     | -1.22       | 1.05      | 1.12        | -1.04      | -1.15        | -2.23      | -1.90        | 1.16       | 1.02         |
| GREM2      | gremlin 2, DAN family BMP inhibitor                  | chr1q43              | BMP signaling pathway                         | ---                                       | 1.15          | 1.18            | 1.08      | 1.08        | -1.23     | -1.16       | -1.20      | -1.03        | -1.93      | -1.28        | -1.75      | -1.45        |
| GREM2      | gremlin 2, DAN family BMP inhibitor                  | chr1q43              | BMP signaling pathway                         | ---                                       | -1.30         | -1.14           | 1.11      | 1.07        | 1.36      | -1.03       | -1.62      | -1.01        | -1.73      | -1.23        | -1.54      | -1.62        |
| GRHL1      | grainyhead-like 1 (Drosophila)                       | chr2p25.1            | transcription, DNA-dependent                  | ---                                       | 1.44          | -1.45           | 1.51      | 1.14        | -3.28     | -2.75       | -1.92      | -1.01        | 1.28       | 2.39         | -1.42      | 1.22         |
| GRHL3      | grainyhead-like 3 (Drosophila)                       | chr1p36.11           | establishment of planar polarity              | ---                                       | 7.22          | 2.02            | 1.25      | 1.96        | -1.26     | -1.43       | 1.62       | 1.29         | 1.43       | -1.05        | 2.41       | 3.20         |
| GRIPR      | glyoxylate reductase/hydroxymethylglutaryl-CoA lyase | chr9q12              | pentose-phosphate shunt                       | ---                                       | -1.04         | -1.04           | 1.06      | 1.04        | 1.09      | -1.05       | 1.20       | 1.04         | 1.36       | 1.05         | -1.09      | -1.01        |
| GRIA1      | glutamate receptor, ionotropic                       | chr5q31.1            | transport                                     | ---                                       | 3.43          | 6.28            | 2.52      | 6.26        | 3.07      | 4.15        | -2.23      | -3.46        | 2.44       | -1.03        | 1.04       | -1.80        |
| GRID1      | glutamate receptor, ionotropic                       | chr10q22             | transport                                     | ---                                       | -2.24         | -2.23           | -1.41     | 1.54        | 4.31      | 2.51        | -1.88      | -1.22        | 1.22       | -1.08        | -1.25      | 2.05         |
| GRIK2      | glutamate receptor, ionotropic                       | chr6p16.3            | behavioral fear response                      | ---                                       | -1.22         | -1.02           | -1.14     | 1.31        | 1.27      | 1.18        | -1.56      | 1.12         | -1.05      | 1.04         | 2.50       | 2.78         |
| GRIK2      | glutamate receptor, ionotropic                       | chr6p16.3            | behavioral fear response                      | ---                                       | -1.01         | 1.02            | 1.11      | -1.06       | 1.07      | -1.14       | -1.40      | -1.17        | -1.84      | -1.36        | -1.14      | -1.22        |
| GRIN2D     | glutamate receptor, ionotropic                       | chr19q13.33          | startle response                              | ---                                       | 1.03          | -1.33           | -1.07     | 1.26        | 1.11      | 1.16        | 1.10       | 1.22         | 1.65       | 1.18         | 1.03       | -1.32        |
| GRINA      | glutamate receptor, ionotropic                       | chr8q24.3            | 0                                             | ---                                       | 1.10          | -1.04           | -1.06     | 1.07        | 1.02      | 1.15        | -1.08      | 1.05         | 1.56       | 1.63         | 1.34       | 1.84         |
| GRK4       | G protein-coupled receptor                           | chr4p16.3            | desensitization of G-protein coupled receptor | Calcium_regulation_in_cardiac_cells_//Gen | -2.31         | -1.09           | 1.18      | 1.84        | 1.19      | 1.05        | -1.44      | -1.12        | -2.08      | -2.27        | 1.02       | -1.35        |
| GRK4       | G protein-coupled receptor                           | chr4p16.3            | desensitization of G-protein coupled receptor | Calcium_regulation_in_cardiac_cells_//Gen | -1.05         | -1.18           | 1.17      | 1.13        | -1.02     | -1.08       | -1.14      | 1.24         | -1.58      | -1.55        | -1.26      | -1.18        |
| GRK4       | G protein-coupled receptor                           | chr4p16.3            | desensitization of G-protein coupled receptor | Calcium_regulation_in_cardiac_cells_//Gen | -1.22         | -1.33           | -1.01     | 1.10        | 1.55      | 1.87        | -1.14      | 1.15         | -1.83      | -1.83        | -2.54      | -2.68        |
| GRK5       | G protein-coupled receptor                           | chr10q26.11          | protein phosphorylation                       | Calcium_regulation_in_cardiac_cells_//Gen | -1.17         | 1.04            | -1.30     | -1.52       | -2.06     | -1.60       | -1.37      | -1.29        | 1.79       | 1.17         | -1.91      | -2.09        |
| GRM1       | glutamate receptor, metabotropic                     | chr6p24              | activation of MAPKK activity                  | GPCRDB_Class_C_Metabotropic glutamate     | 1.22          | 1.45            | 1.26      | 1.23        | -2.13     | -1.51       | -1.79      | -1.19        | -25.95     | -3.38        | -7.98      | -2.45        |
| GRM5       | glutamate receptor, metabotropic                     | chr11q14.3           | activation of MAPKKK activity                 | GPCRDB_Class_C_Metabotropic glutamate     | 1.07          | -6.55           | 2.38      | 1.33        | -1.20     | -1.26       | -1.52      | -3.58        | -1.26      | -2.03        | -1.50      | -4.29        |
| GRM8       | glutamate receptor, metabotropic                     | chr7q31.3-q32.1      | signal transduction                           | GPCRDB_Class_C_Metabotropic glutamate     | 1.14          | -1.07           | 1.15      | -1.21       | -1.65     | -2.44       | 6.17       | 5.10         | 4.23       | 3.42         | 2.40       | 3.37         |
| GRP        | gastrin-releasing peptide                            | chr18q21.1-q21.32    | signal transduction                           | ---                                       | -1.99         | -1.24           | -2.52     | 1.11        | 1.58      | 1.19        | 2.30       | 1.77         | 1.37       | 1.30         | -2.08      | 1.02         |
| GRPEL1     | GrpE-like 1, mitochondrial                           | chr4p16              | protein folding                               | ---                                       | 1.02          | -1.03           | -1.12     | -1.21       | 1.08      | -1.06       | 1.16       | 1.11         | 1.58       | 1.52         | 1.81       | 1.67         |
| GRPEL1     | GrpE-like 1, mitochondrial                           | chr4p16              | protein folding                               | ---                                       | -1.09         | -1.13           | -1.05     | -1.08       | -1.03     | -1.09       | 1.19       | 1.11         | 1.49       | 1.43         | 1.50       | 1.52         |
| GRSF1      | G-rich RNA sequence binding                          | chr4q13              | mRNA polyadenylation                          | ---                                       | -1.07         | -1.04           | 1.02      | -1.01       | 1.06      | 1.01        | 1.23       | 1.08         | 1.35       | 1.40         | 1.51       | 1.49         |
| GRSF1      | G-rich RNA sequence binding                          | chr4q13              | mRNA polyadenylation                          | ---                                       | 1.00          | 1.01            | 1.10      | 1.05        | 1.07      | 1.01        | 1.20       | 1.05         | 1.06       | 1.26         | 1.56       | 1.45         |
| GRSF1      | G-rich RNA sequence binding                          | chr4q13              | mRNA polyadenylation                          | ---                                       | 1.02          | 1.08            | 1.00      | 1.01        | -1.05     | 1.04        | -1.17      | -1.12        | -1.27      | -1.03        | -1.11      | -1.20        |
| GRSF1      | G-rich RNA sequence binding                          | chr4q13              | mRNA polyadenylation                          | ---                                       | 1.12          | 1.07            | 1.05      | -1.03       | 1.06      | 1.09        | -1.33      | -1.06        | -1.55      | -1.33        | -1.55      | -1.56        |
| GS1-111G14 | NULL /// NULL                                        | ---                  | 0                                             | ---                                       | 1.13          | 1.00            | -1.01     | 1.02        | -1.14     | 1.02        | 1.03       | -1.01        | 1.00       | 1.03         | -1.11      | -1.32        |
| GS1-46S1N3 | NULL /// NULL                                        | ---                  | 0                                             | ---                                       | 2.04          | 1.66            | 1.05      | -1.48       | 1.22      | -1.51       | -7.00      | -1.43        | -2.34      | -1.34        | 1.42       | 2.12         |
| GSAP       | gamma-secretase activating                           | chr7q11.23           | regulation of proteolysis                     | ---                                       | -1.28         | -1.56           | -1.16     | -1.25       | 1.76      | -1.08       | -1.03      | -1.78        | -1.14      | -1.12        | 1.27       | -1.05        |
| GSDMB      | gasdermin B                                          | chr17q12             | 0                                             | ---                                       | -1.16         | 1.06            | 1.80      | 2.71        | 2.80      | 2.21        | 1.10       | 1.02         | -1.12      | -1.35        | -1.07      | 1.84         |
| GSDMB      | gasdermin B                                          | chr17q12             | 0                                             | ---                                       | -1.06         | -2.89           | -3.25     | -1.32       | 1.22      | -1.23       | 3.11       | 3.62         | 1.31       | -1.34        | 3.37       | 5.30         |
| GSE1       | Gse1 coiled-coil protein                             | chr16q24.1           | 0                                             | ---                                       | -1.03         | -1.00           | -1.02     | 1.07        | -1.09     | -1.05       | 1.02       | -1.02        | 1.08       | 1.06         | 1.15       | 1.10         |
| GSE1       | Gse1 coiled-coil protein                             | chr16q24.1           | 0                                             | ---                                       | -1.04         | -1.01           | 1.04      | -1.10       | 1.01      | 1.05        | -1.21      | -1.11        | -1.46      | -1.12        | -1.09      | -1.29        |
| GSQ2       | germ cell associated 2 (hasp)                        | chr17p13             | protein phosphorylation                       | ---                                       | 1.05          | 1.01            | 1.10      | -1.01       | -1.04     | -1.07       | 1.65       | 1.46         | 1.06       | 1.17         | 1.24       | 1.44         |
| GSK3B      | glycogen synthase kinase 3                           | chr3q13.3            | re-entry into mitotic cell cycle              | Cell_cycle_KEGG_//GenMAPP_//Glyco         | -1.07         | -1.08           | 1.04      | 1.14        | 1.16      | 1.02        | 1.27       | 1.10         | 2.53       | 1.85         | 2.51       | 2.37         |
| GSK3B      | glycogen synthase kinase 3                           | chr3q13.3            | re-entry into mitotic cell cycle              | Cell_cycle_KEGG_//GenMAPP_//Glyco         | 1.12          | -1.10           | 1.15      | 1.15        | -1.19     | -1.17       | -1.29      | 1.01         | 2.33       | 2.26         | 2.07       | 2.08         |
| GSN        | gelsolin                                             | chr9q33              | apoptotic process                             | ---                                       | 1.11          | 1.07            | 1.04      | -1.02       | -1.01     | 1.05        | -1.05      | -1.04        | -1.31      | -1.20        | -1.62      | -1.19        |
| GSN        | gelsolin                                             | chr9q33              | apoptotic process                             | ---                                       | -1.18         | -2.63           | -1.31     | -1.16       | 2.73      | 1.22        | 1.68       | 1.05         | -1.66      | -1.25        | -1.48      | -1.49        |
| GSN        | gelsolin                                             | chr9q33              | apoptotic process                             | ---                                       | 1.18          | 1.07            | -1.03     | 1.08        | -1.33     | 1.21        | -1.11      | -1.42        | -1.45      | -1.15        | -1.30      | -1.20        |
| GSPT1      | G1 to S phase transition 1                           | chr16p13.1           | G1                                            | ---                                       | -1.08         | -1.09           | 1.05      | -1.01       | 1.03      | 1.00        | -1.31      | -1.14        | -1.33      | -1.25        | -1.59      | -1.39        |
| GSPT1      | G1 to S phase transition 1                           | chr16p13.1           | G1                                            | ---                                       | 1.26          | 1.11            | 1.08      | 1.04        | 1.35      | 1.14        | 1.13       | -1.70        | -2.43      | -1.79        | -1.53      | -1.36        |

| ID             | Gene Title                            | Chromosomal Location | 1st Gene Ontology Biological Process       | Pathway                               | A2497 30 mins | A2497P' 30 mins | A2497 2 h | A2497P' 2 h | A2497 4 h | A2497P' 4 h | A2497 24 h | A2497P' 24 h | A2497 48 h | A2497P' 48 h | A2497 72 h | A2497P' 72 h |
|----------------|---------------------------------------|----------------------|--------------------------------------------|---------------------------------------|---------------|-----------------|-----------|-------------|-----------|-------------|------------|--------------|------------|--------------|------------|--------------|
| GSPT1          | G1 to S phase transition 1            | chr16p13.1           | G1                                         | ---                                   | 1.04          | 1.12            | -1.04     | -1.02       | -1.03     | -1.04       | -1.10      | -1.03        | 1.06       | 1.04         | 1.30       | 1.27         |
| GSPT1          | G1 to S phase transition 1            | chr16p13.1           | G1                                         | ---                                   | -1.13         | -1.10           | -1.08     | -1.21       | 1.27      | 1.16        | -1.53      | -1.52        | -1.73      | -1.45        | -1.50      | -1.63        |
| GSR            | glutathione reductase                 | chr8p21.1            | glutathione metabolic process              | ---                                   | 1.06          | 1.17            | -1.08     | 1.00        | -1.07     | 1.09        | -1.37      | -1.14        | -1.13      | -1.02        | -1.14      | -1.27        |
| GSR            | glutathione reductase                 | chr8p21.1            | glutathione metabolic process              | ---                                   | -1.04         | -1.15           | 1.04      | 1.05        | -1.04     | -1.13       | 1.33       | 1.19         | 1.38       | 1.12         | 1.32       | 1.10         |
| GSS            | glutathione synthetase                | chr20q11.2           | cellular amino acid metabolic process      | ---                                   | -1.15         | -1.20           | -1.01     | 1.11        | 1.20      | 1.14        | 1.08       | -1.01        | 1.28       | 1.17         | 1.10       | 1.27         |
| GSTA4          | glutathione S-transferase alpha       | chr6p12.1            | glutathione metabolic process              | ---                                   | -1.02         | -1.06           | -1.05     | -1.03       | 1.05      | -1.05       | -1.32      | -1.21        | -1.96      | -1.38        | -1.75      | -1.39        |
| GSTA4          | glutathione S-transferase alpha       | chr6p12.1            | glutathione metabolic process              | ---                                   | -1.80         | -2.41           | 1.37      | 1.21        | -1.41     | -1.15       | -1.38      | -1.12        | -3.19      | -2.04        | -1.80      | -1.66        |
| GSTCD          | glutathione S-transferase, cytosolic  | chr4q24              | rRNA processing                            | ---                                   | 1.31          | 1.33            | 1.12      | 1.16        | -1.16     | 1.07        | -1.13      | -1.11        | -1.71      | -1.24        | -1.66      | -2.16        |
| GSTCD          | glutathione S-transferase, cytosolic  | chr4q24              | 0                                          | ---                                   | 1.36          | 1.82            | -1.31     | -1.09       | -1.36     | -1.13       | 1.11       | -1.01        | -1.70      | -1.76        | -4.82      | -2.19        |
| GSTK1          | glutathione S-transferase, cytosolic  | chr7q34              | glutathione metabolic process              | ---                                   | -1.02         | -1.00           | -1.05     | -1.00       | -1.09     | -1.07       | 1.11       | 1.10         | 1.05       | 1.16         | -1.33      | -1.12        |
| GSTM1          | glutathione S-transferase, cytosolic  | chr1p13.3            | glutathione metabolic process              | ---                                   | -1.05         | -1.04           | 1.01      | -1.03       | 1.05      | -1.09       | 1.08       | 1.00         | 1.00       | -1.01        | -1.54      | -1.39        |
| GSTM1          | glutathione S-transferase, cytosolic  | chr1p13.3            | glutathione metabolic process              | ---                                   | 1.03          | 1.01            | -1.06     | -1.07       | 1.02      | -1.02       | 1.07       | 1.00         | 1.03       | -1.02        | -1.55      | -1.47        |
| GSTM2          | glutathione S-transferase, cytosolic  | chr1p13.3            | glutathione metabolic process              | ---                                   | -1.08         | -1.08           | -1.07     | -1.14       | -1.11     | -1.06       | -1.00      | 1.11         | 1.03       | 1.07         | -1.64      | -1.42        |
| GSTM3          | glutathione S-transferase, cytosolic  | chr1p13.3            | glutathione metabolic process              | Circadian_Eercise // GenMAPP          | -1.05         | -1.20           | 1.06      | -1.07       | 1.13      | -1.10       | -1.15      | -1.12        | 1.20       | 1.20         | 1.45       | 1.77         |
| GSTM4          | glutathione S-transferase, cytosolic  | chr1p13.3            | glutathione metabolic process              | ---                                   | -1.31         | -1.51           | -1.04     | -1.02       | 1.05      | -1.02       | 1.04       | -1.07        | -1.17      | -1.03        | 1.08       | 1.31         |
| GSTM5          | glutathione S-transferase, cytosolic  | chr1p13.3            | glutathione metabolic process              | ---                                   | 2.32          | 1.52            | 1.36      | 1.47        | -1.19     | 1.08        | 2.79       | 2.56         | 1.72       | 1.94         | 1.98       | 3.37         |
| GSTP1          | glutathione S-transferase, cytosolic  | chr11q13             | response to reactive oxygen species        | Circadian_Eercise // GenMAPP          | -1.08         | -1.02           | -1.09     | -1.10       | -1.01     | 1.02        | -1.04      | -1.11        | 1.19       | 1.09         | -1.13      | -1.14        |
| GSTT1          | glutathione S-transferase, cytosolic  | chr22q11.23          | glutathione metabolic process              | ---                                   | -1.08         | -1.10           | 1.35      | 1.09        | 1.13      | 1.06        | 1.03       | 1.06         | 1.01       | 1.04         | -1.23      | -1.09        |
| GSTT2          | glutathione S-transferase, cytosolic  | chr22q11.23          | xenobiotic metabolic process               | ---                                   | -1.02         | -1.21           | -1.01     | 1.22        | 1.14      | -1.01       | 1.05       | -1.15        | 1.05       | 1.10         | -1.65      | -1.51        |
| GSTZ1          | glutathione S-transferase, cytosolic  | chr14q24.3           | L-phenylalanine catabolic process          | ---                                   | 1.04          | 1.04            | 1.02      | -1.06       | 1.19      | -1.08       | 1.06       | -1.02        | 1.28       | 1.12         | 1.32       | 1.44         |
| GTDCl          | glycosyltransferase-like domain       | chr2q22.3            | biosynthetic process                       | ---                                   | 1.04          | 1.27            | -1.02     | 1.13        | -1.09     | -2.04       | 1.22       | 1.13         | 2.06       | 4.44         | 1.37       | 2.23         |
| GTDCl          | glycosyltransferase-like domain       | chr2q22.3            | biosynthetic process                       | ---                                   | -1.46         | -6.95           | 1.15      | -1.52       | 2.85      | 3.47        | 7.31       | 2.44         | 4.55       | 7.17         | 2.19       | 3.72         |
| GTDCl          | glycosyltransferase-like domain       | chr2q22.3            | biosynthetic process                       | ---                                   | 1.12          | 1.19            | -1.07     | -1.23       | -1.22     | 1.30        | -1.00      | 1.28         | 1.39       | 1.64         | 1.39       | 1.65         |
| GTF2B          | general transcription factor          | chr1p22-p21          | transcription, DNA-dependent               | RNA_transcription_Reactome // GenMAPP | -1.02         | 1.00            | -1.01     | -1.08       | 1.00      | 1.02        | -1.16      | -1.17        | 1.01       | 1.03         | 1.17       | 1.07         |
| GTF2E2         | general transcription factor          | chr8p12              | transcription, DNA-dependent               | RNA_transcription_Reactome // GenMAPP | -1.04         | -1.05           | 1.02      | 1.02        | -1.04     | -1.14       | 1.18       | 1.19         | 1.51       | 1.37         | 1.32       | 1.40         |
| GTF2H1         | general transcription factor          | chr11p15.1-p14       | regulation of cyclin-dependent protein ser | RNA_transcription_Reactome // GenMAPP | 1.01          | 1.07            | 1.04      | -1.14       | 1.12      | -1.00       | 1.05       | 1.03         | -1.12      | -1.18        | 1.24       | 1.32         |
| GTF2H1         | general transcription factor          | chr11p15.1-p14       | regulation of cyclin-dependent protein ser | RNA_transcription_Reactome // GenMAPP | 1.20          | 1.16            | -1.08     | -1.08       | -1.06     | -1.04       | 1.23       | -1.21        | 2.03       | 2.29         | 1.47       | 1.32         |
| GTF2H1         | general transcription factor          | chr11p15.1-p14       | regulation of cyclin-dependent protein ser | RNA_transcription_Reactome // GenMAPP | 1.04          | 1.05            | -1.01     | 1.01        | -1.03     | 1.01        | 1.04       | -1.07        | -1.25      | 1.02         | 1.02       | 1.02         |
| GTF2H2         | general transcription factor          | chr5q13.2            | nucleotide-excision repair, DNA damage     | RNA_transcription_Reactome // GenMAPP | 1.17          | 1.09            | 1.00      | -1.03       | 1.23      | 1.18        | -1.46      | -1.22        | -1.45      | -1.56        | -1.07      | -1.28        |
| GTF2H3         | general transcription factor          | chr12q24.31          | nucleotide-excision repair, DNA damage     | ---                                   | 1.37          | 1.34            | 1.05      | -1.13       | -1.15     | 1.01        | -1.19      | 1.09         | -1.46      | -1.37        | -1.34      | -1.77        |
| GTF2H5         | general transcription factor          | chr6q25.3            | DNA repair                                 | ---                                   | -1.29         | -1.26           | -1.37     | 1.39        | 1.07      | -1.38       | -1.37      | -1.93        | -2.26      | -2.01        | -2.72      | -1.89        |
| GTF2I // GTF2L | general transcription factor          | chr7q11.23           | transcription, DNA-dependent               | ---                                   | 1.08          | 1.05            | -1.05     | 1.03        | -1.05     | -1.02       | -1.03      | -1.09        | -1.14      | -1.08        | -1.38      | -1.23        |
| GTF2I // GTF2L | general transcription factor          | chr7q11.23           | transcription, DNA-dependent               | ---                                   | -1.07         | 1.06            | -1.04     | -1.03       | -1.01     | 1.05        | -1.15      | -1.07        | -1.73      | -1.44        | -1.73      | -1.73        |
| GTF2IRD1       | GTF2I repeat domain containing        | chr7q11.23           | transcription, DNA-dependent               | ---                                   | -1.04         | -1.07           | -1.01     | 1.05        | -1.02     | -1.02       | 1.18       | 1.12         | 1.10       | 1.11         | 1.32       | 1.27         |
| GTF2IRD2       | GTF2I repeat domain containing        | chr7q11.23           | transcription, DNA-dependent               | ---                                   | -1.05         | 1.21            | 1.03      | 1.17        | -1.07     | -1.08       | 1.24       | 1.31         | 1.05       | 1.19         | -1.57      | -1.32        |
| GTF3A          | general transcription factor          | chr13q12.3-q13.1     | transcription, DNA-dependent               | ---                                   | 1.03          | 1.01            | -1.03     | -1.03       | 1.04      | -1.01       | 1.06       | 1.02         | 1.13       | -1.01        | -1.15      | -1.10        |
| GTF3A          | general transcription factor          | chr13q12.3-q13.1     | transcription, DNA-dependent               | ---                                   | -1.06         | -1.00           | -1.02     | -1.02       | 1.04      | -1.09       | 1.13       | 1.07         | 1.25       | -1.01        | -1.11      | -1.04        |
| GTF3C2         | general transcription factor          | chr2p23.3            | transcription, DNA-dependent               | ---                                   | 1.02          | -1.03           | -1.07     | 1.26        | 1.05      | -1.09       | 1.08       | -1.00        | 1.99       | 1.89         | 1.38       | 1.29         |
| GTF3C3         | general transcription factor          | chr2q33.1            | transcription, DNA-dependent               | ---                                   | -1.01         | 1.01            | 1.08      | 1.20        | 1.07      | 1.01        | 1.11       | 1.09         | 1.08       | 1.11         | 1.41       | 1.26         |
| GTF3C3         | general transcription factor          | chr2q33.1            | transcription, DNA-dependent               | ---                                   | 1.11          | 1.07            | 1.14      | 1.24        | 1.22      | -1.02       | -1.11      | -1.48        | -1.92      | -2.24        | -3.26      | -2.08        |
| GTF3C3         | general transcription factor          | chr2q33.1            | transcription, DNA-dependent               | ---                                   | 1.06          | 1.02            | 1.02      | 1.02        | 1.10      | 1.20        | -1.25      | 1.07         | -1.40      | -1.16        | -2.20      | -2.53        |
| GTF3C3         | general transcription factor          | chr2q33.1            | transcription, DNA-dependent               | ---                                   | 1.09          | 1.03            | 1.06      | 1.09        | -1.02     | 1.03        | -1.09      | 1.13         | -1.20      | -1.06        | -1.26      | -1.36        |
| GTF3C4         | general transcription factor          | chr9q34.13           | transcription, DNA-dependent               | ---                                   | -1.04         | -1.02           | 1.13      | 1.24        | 1.22      | 1.07        | 1.37       | -1.02        | 1.49       | 1.40         | 1.67       | 1.38         |
| GTF3C4         | general transcription factor          | chr9q34.13           | transcription, DNA-dependent               | ---                                   | -1.09         | -1.06           | 1.22      | 1.05        | 1.05      | 1.17        | -1.16      | -1.01        | -1.42      | -1.45        | -1.11      | -1.16        |
| GTF3C5         | general transcription factor          | chr9q34              | transcription, DNA-dependent               | ---                                   | -1.02         | 1.10            | 1.31      | 1.10        | 1.02      | -1.11       | -1.02      | 1.03         | 1.13       | 1.04         | -1.10      | 1.05         |
| GTF3C6         | general transcription factor          | chr6q21              | transcription, DNA-dependent               | ---                                   | 1.07          | 1.05            | -1.04     | -1.00       | -1.03     | -1.03       | -1.05      | 1.03         | -1.31      | -1.30        | -1.54      | -1.40        |
| GTPBP1         | GTP binding protein 1                 | chr22q13.1           | GTP catabolic process                      | ---                                   | -1.06         | -1.15           | 1.06      | 1.08        | 1.01      | 1.01        | 1.28       | 1.21         | 1.52       | 1.47         | 1.16       | 1.25         |
| GTPBP1         | GTP binding protein 1                 | chr22q13.1           | GTP catabolic process                      | ---                                   | -1.06         | -1.05           | 1.02      | -1.01       | 1.14      | 1.07        | 2.04       | 1.45         | 2.35       | 2.16         | 1.86       | 2.12         |
| GTPBP10        | GTP-binding protein 10 (p115)         | chr7q21.13           | GTP catabolic process                      | ---                                   | -1.09         | 1.02            | 1.06      | -1.33       | 1.18      | 1.22        | -1.16      | 1.51         | -1.89      | -1.79        | -1.28      | -1.09        |
| GTPBP10        | GTP-binding protein 10 (p115)         | chr7q21.13           | GTP catabolic process                      | ---                                   | 1.05          | 1.02            | 1.06      | 1.22        | 1.17      | -1.01       | 1.17       | 1.02         | 1.38       | 1.17         | 1.81       | 1.89         |
| GTPBP2         | GTP binding protein 2                 | chr6p21              | GTP catabolic process                      | ---                                   | 1.03          | -1.10           | 1.00      | -1.03       | -1.00     | -1.10       | 1.18       | 1.01         | 1.11       | 1.39         | 1.34       | 1.44         |
| GTPBP3         | GTP binding protein 3 (mitochondrial) | chr19p13.11          | GTP catabolic process                      | ---                                   | -1.07         | 1.05            | -1.01     | 1.09        | 1.10      | 1.04        | 1.16       | 1.14         | -1.31      | -1.51        | 1.05       | 1.24         |
| GTPBP3         | GTP binding protein 3 (mitochondrial) | chr19p13.11          | GTP catabolic process                      | ---                                   | 1.14          | 1.04            | -1.02     | -1.03       | 1.01      | 1.00        | -1.04      | -1.08        | -1.03      | 1.00         | -1.10      | -1.11        |
| GTPBP4         | GTP binding protein 4                 | chr10p15-p14         | regulation of cyclin-dependent protein ser | ---                                   | 1.00          | -1.01           | -1.04     | 1.07        | -1.02     | 1.07        | -1.14      | -1.05        | 1.41       | 1.34         | 1.37       | 1.27         |
| GTPBP4         | GTP binding protein 4                 | chr10p15-p14         | regulation of cyclin-dependent protein ser | ---                                   | 1.17          | 1.02            | -1.02     | -1.53       | -1.18     | 1.12        | -1.13      | -1.18        | 1.01       | 1.09         | 1.03       | 1.30         |
| GTPBP4         | GTP binding protein 4                 | chr10p15-p14         | regulation of cyclin-dependent protein ser | ---                                   | -1.09         | -1.18           | -1.02     | 1.10        | 1.06      | 1.17        | -1.13      | 1.01         | 1.30       | 1.27         | 1.45       | 1.49         |
| GTPBP4 // B    | GTP binding protein 4                 | chr10p15-p14         | regulation of cyclin-dependent protein ser | ---                                   | -1.04         | -1.12           | -1.04     | -1.00       | 1.20      | 1.03        | -1.06      | 1.03         | 1.15       | 1.04         | 1.31       | 1.40         |
| GTSE1          | G-2 and S-phase expressed             | chr22q13.2-q13.3     | G2 phase of mitotic cell cycle             | ---                                   | -1.06         | -1.06           | 1.01      | -1.06       | -1.01     | -1.07       | -1.17      | -1.08        | -1.00      | 1.02         | 1.26       | 1.32         |
| GTSE1          | G-2 and S-phase expressed             | chr22q13.2-q13.3     | G2 phase of mitotic cell cycle             | ---                                   | 1.03          | -1.28           | 1.02      | -1.21       | 1.02      | -1.03       | -1.21      | -1.17        | -1.17      | 1.14         | 1.13       | 1.16         |
| GTSE1          | G-2 and S-phase expressed             | chr22q13.2-q13.3     | G2 phase of mitotic cell cycle             | ---                                   | 1.05          | 1.03            | 1.03      | -1.05       | 1.17      | 1.14        | -1.27      | -1.01        | -1.13      | -1.16        | 1.24       | 1.44         |
| GTSE1          | G-2 and S-phase expressed             | chr22q13.2-q13.3     | G2 phase of mitotic cell cycle             | ---                                   | -1.04         | -1.16           | -1.20     | 1.08        | 1.28      | 1.10        | -1.06      | -1.10        | 1.31       | 1.32         | 1.40       | 1.59         |
| GUCA1B         | guanylate cyclase activator           | chr6p21.1            | receptor guanylyl cyclase signaling pathw  | ---                                   | -1.08         | 1.36            | 1.53      | 3.01        | -1.41     | -1.47       | 1.29       | 1.06         | 1.58       | 2.18         | 2.44       | 2.43         |
| GUCA1C         | guanylate cyclase activator           | chr3q13.1            | signal transduction                        | ---                                   | -2.99         | -1.53           | 2.10      | 2.44        | -1.29     | -1.19       | 1.99       | -1.72        | 10.73      | 14.86        | -1.28      | -8.59        |
| GUCD1          | guanylyl cyclase domain containing    | chr22q11.2           | 0                                          | ---                                   | -1.13         | -1.06           | -1.03     | -1.06       | 1.04      | -1.05       | 1.03       | -1.02        | 1.07       | 1.11         | 1.09       | 1.19         |
| GUCY1A3        | guanylate cyclase 1, soluble          | chr4q31.1-q31.2      | cGMP biosynthetic process                  | Smooth_muscle_contraction // GenMAPP  | 1.10          | -1.13           | -4.24     | -5.01       | 2.54      | 5.74        | 1.54       | 3.81         | 2.50       | 4.68         | 2.94       | 5.79         |
| GUF1           | GUF1 GTPase homolog (S)               | chr4p12              | GTP catabolic process                      | ---                                   | 1.05          | -1.13           | 1.10      | 1.18        | -1.04     | -1.03       | -1.20      | -1.08        | -1.28      | -1.25        | 1.09       | 1.21         |

| ID           | Gene Title                                 | Chromosomal Location      | 1st Gene Ontology Biological Process                                 | Pathway                                                      | A2497 30 mins | A2497P' 30 mins | A2497 2 h | A2497P' 2 h | A2497 4 h | A2497P' 4 h | A2497 24 h | A2497P' 24 h | A2497 48 h | A2497P' 48 h | A2497 72 h | A2497P' 72 h |
|--------------|--------------------------------------------|---------------------------|----------------------------------------------------------------------|--------------------------------------------------------------|---------------|-----------------|-----------|-------------|-----------|-------------|------------|--------------|------------|--------------|------------|--------------|
| GUK1         | guanylate kinase 1                         | chr1q32-q41               | purine nucleotide metabolic process                                  | ---                                                          | -1.02         | -1.05           | -1.05     | 1.00        | 1.01      | -1.03       | 1.18       | 1.08         | 1.78       | 1.69         | 1.33       | 1.69         |
| GUK1         | guanylate kinase 1                         | chr1q32-q41               | purine nucleotide metabolic process                                  | ---                                                          | -1.14         | -1.16           | -1.06     | -1.01       | 1.05      | 1.00        | 1.25       | 1.18         | 1.88       | 1.67         | 1.30       | 1.57         |
| GULP1        | GULP, engulfment adaptor                   | chr2q32.3-q33             | transport                                                            | ---                                                          | 1.00          | -1.07           | 1.03      | 1.24        | -1.28     | 1.29        | -1.00      | 1.10         | -1.04      | -1.04        | -1.77      | -2.25        |
| GULP1        | GULP, engulfment adaptor                   | chr2q32.3-q33             | transport                                                            | ---                                                          | 1.11          | -1.01           | 1.20      | 1.04        | -1.03     | 1.05        | -1.23      | -1.06        | -1.58      | -1.13        | -1.64      | -2.00        |
| GUSBP1       | glucuronidase, beta pseudo                 | chr5p14.3                 | carbohydrate metabolic process                                       | ---                                                          | -1.82         | -1.51           | 1.42      | 1.23        | 1.20      | 1.44        | -1.04      | 1.25         | -2.60      | -2.49        | -2.84      | -2.04        |
| GUSBP1       | glucuronidase, beta pseudo                 | chr5p14.3                 | carbohydrate metabolic process                                       | ---                                                          | -1.18         | -1.42           | -1.15     | 1.41        | -1.19     | -1.21       | -1.25      | 1.02         | -2.96      | -2.14        | -2.77      | -2.24        |
| GUSBP1 /// C | glucuronidase, beta pseudo                 | chr5p14.3 /// chr6p11.2   | carbohydrate metabolic process                                       | ---                                                          | -1.00         | 1.00            | 1.08      | 1.14        | 1.21      | 1.16        | -1.22      | -1.18        | -2.65      | -2.33        | -2.56      | -1.92        |
| GUSBP2       | glucuronidase, beta pseudo                 | chr6p21                   | carbohydrate metabolic process                                       | ---                                                          | 1.06          | 1.06            | 1.16      | 1.17        | 1.39      | 1.24        | -1.00      | -1.50        | -2.95      | -2.48        | -1.25      | -1.34        |
| GUSBP3 /// C | glucuronidase, beta pseudo                 | chr5q13.2                 | skeletal system development                                          | ---                                                          | 1.18          | 1.14            | 1.21      | 1.66        | 1.22      | 1.29        | -1.35      | 1.05         | -2.29      | -1.62        | -2.17      | -1.90        |
| GUSBP3 /// C | glucuronidase, beta pseudo                 | chr5q13 /// chr5q13.2     | skeletal system development                                          | ---                                                          | 1.09          | 1.13            | 1.02      | -1.03       | 1.12      | -1.03       | -1.40      | -1.18        | -1.62      | -1.33        | -2.01      | -1.36        |
| GUSBP4       | glucuronidase, beta pseudo                 | chr6p11.2                 | 0                                                                    | ---                                                          | 1.54          | 1.02            | -1.01     | 1.26        | -1.00     | 1.23        | 1.07       | 1.09         | -2.76      | -4.69        | -3.02      | -3.46        |
| GUSBP4       | glucuronidase, beta pseudo                 | chr6p11.2                 | 0                                                                    | ---                                                          | -1.16         | -1.44           | 1.08      | 1.23        | 1.17      | 1.33        | -1.06      | -1.13        | -2.31      | -1.60        | -1.39      | -1.33        |
| GUSBP5       | glucuronidase, beta pseudo                 | chr4q31.21                | 0                                                                    | ---                                                          | -3.48         | -4.81           | 3.03      | 1.79        | -2.48     | 2.00        | 1.65       | 1.19         | 1.25       | 1.44         | -8.22      | -1.82        |
| GVQW1        | GVQW motif containing 1                    | chr9p21.1                 | 0                                                                    | ---                                                          | 1.09          | -1.08           | -1.18     | -1.14       | -1.17     | -1.25       | 1.13       | 1.22         | -1.68      | -1.57        | -1.37      | -1.48        |
| GXYLT1       | glucoside xylosyltransferase               | chr12q12                  | carbohydrate metabolic process                                       | ---                                                          | 1.02          | 1.04            | 1.16      | 1.23        | 1.12      | 1.16        | -1.27      | -1.21        | -1.72      | -1.53        | -1.66      | -1.82        |
| GXYLT2       | glucoside xylosyltransferase               | chr3p13                   | O-glycan processing                                                  | ---                                                          | -1.32         | -1.28           | 1.01      | -1.17       | 1.22      | 1.08        | 1.04       | 1.06         | -1.23      | 1.06         | -2.11      | -1.56        |
| GYG2         | glycogenin 2                               | chrXq22.3                 | carbohydrate metabolic process                                       | Glycogen_Metabolism // GenMAPP                               | -1.14         | -1.25           | -1.05     | -1.05       | -1.09     | -1.04       | -1.05      | 1.08         | -1.24      | -1.39        | -2.54      | -2.55        |
| GYLT1B       | glycosyltransferase-like 1B                | chr1p11.2                 | muscle cell homeostasis                                              | ---                                                          | -1.24         | 1.37            | 2.04      | 1.18        | 1.18      | 1.06        | 1.19       | -1.00        | 1.98       | 2.29         | 1.41       | 1.33         |
| GYP A        | glycophorin A (MNS blood)                  | chr4q31.21                | cytoskeletal anchoring at plasma membrane                            | ---                                                          | 1.59          | 1.18            | -4.65     | -1.15       | -2.61     | -2.11       | 3.64       | 1.85         | 8.73       | 2.41         | -1.86      | -2.11        |
| GY S1        | glycogen synthase 1 (muscle)               | chr19q13.3                | carbohydrate metabolic process                                       | Glycogen_Metabolism // GenMAPP                               | -1.11         | -1.22           | -1.01     | 1.11        | 1.11      | -1.00       | 1.34       | 1.18         | 1.51       | 1.69         | -1.03      | 1.34         |
| GZF1         | GDNF-inducible zinc finger                 | chr20p11.21               | negative regulation of transcription from RNA polymerase II promoter | ---                                                          | -1.03         | -1.08           | 1.18      | 1.21        | 1.22      | 1.13        | 1.12       | 1.09         | -1.33      | -1.17        | 1.19       | 1.26         |
| GZF1         | GDNF-inducible zinc finger                 | chr20p11.21               | negative regulation of transcription from RNA polymerase II promoter | ---                                                          | 1.04          | 1.16            | 1.06      | 1.12        | 1.04      | 1.03        | -1.14      | -1.04        | -1.54      | -2.31        | -1.09      | -1.01        |
| H19 /// MIR6 | H19, imprinted maternally                  | chr1p15.5                 | 0                                                                    | ---                                                          | -1.14         | -1.05           | -1.00     | 1.00        | 1.00      | -1.09       | 1.17       | 1.12         | 1.24       | 1.09         | -1.44      | -1.06        |
| H19 /// MIR6 | H19, imprinted maternally                  | chr1p15.5                 | 0                                                                    | ---                                                          | -1.00         | -1.13           | -1.16     | -1.15       | -1.05     | 1.19        | 1.05       | 1.04         | -1.11      | -1.02        | -1.65      | -1.30        |
| H2AFJ        | H2A histone family, member J               | chr12p12.3                | nucleosome assembly                                                  | ---                                                          | 1.09          | -1.17           | 1.12      | 1.29        | 1.21      | 1.03        | -1.32      | -1.15        | -1.39      | -1.28        | -1.58      | -1.28        |
| H2AFJ        | H2A histone family, member J               | chr12p12.3                | nucleosome assembly                                                  | ---                                                          | -1.13         | -1.10           | 1.02      | 1.04        | 1.04      | -1.12       | 1.17       | 1.17         | 1.57       | 1.38         | 1.38       | 1.38         |
| H2AFJ        | H2A histone family, member J               | chr12p12.3                | nucleosome assembly                                                  | ---                                                          | -1.15         | -1.11           | -1.02     | 1.02        | 1.09      | -1.13       | 1.32       | 1.19         | 1.70       | 1.40         | 1.44       | 1.42         |
| H2AFV        | H2A histone family, member V               | chr7p13                   | nucleosome assembly                                                  | ---                                                          | 1.02          | 1.02            | 1.09      | -1.01       | 1.02      | -1.04       | -1.18      | -1.17        | -1.68      | -1.46        | -1.83      | -1.91        |
| H2AFV        | H2A histone family, member V               | chr7p13                   | nucleosome assembly                                                  | ---                                                          | 1.11          | 1.00            | -1.01     | 1.04        | -1.09     | 1.02        | -1.39      | -1.22        | -1.74      | -1.49        | -2.14      | -2.07        |
| H2AFY        | H2A histone family, member Y               | chr5q31.1                 | nucleosome assembly                                                  | ---                                                          | 1.02          | 1.05            | -1.10     | -1.01       | -1.09     | -1.00       | 1.07       | -1.16        | 1.00       | -1.07        | -1.14      | -1.22        |
| H2AFY        | H2A histone family, member Y               | chr5q31.1                 | nucleosome assembly                                                  | ---                                                          | 1.20          | 1.18            | 1.09      | 1.27        | 1.06      | 1.16        | 1.23       | 1.21         | -1.61      | -1.29        | -1.30      | -1.62        |
| H2AFY        | H2A histone family, member Y               | chr5q31.1                 | nucleosome assembly                                                  | ---                                                          | 1.05          | -1.03           | 1.01      | -1.01       | -1.01     | 1.04        | -1.02      | -1.06        | -1.39      | -1.27        | -1.42      | -1.43        |
| H2AFY        | H2A histone family, member Y               | chr5q31.1                 | nucleosome assembly                                                  | ---                                                          | -1.03         | 1.05            | 1.35      | -1.04       | -1.05     | 1.02        | -1.16      | -1.03        | -2.89      | -2.39        | -2.04      | -2.41        |
| H2AFY        | H2A histone family, member Y               | chr5q31.1                 | nucleosome assembly                                                  | ---                                                          | 1.01          | -1.12           | -1.07     | -1.33       | 1.06      | -1.06       | 1.15       | -1.01        | -1.80      | -1.63        | -1.79      | -1.70        |
| H2AFY2       | H2A histone family, member Y2              | chr10q22.1                | nucleosome assembly                                                  | ---                                                          | 2.47          | 2.14            | 2.46      | 3.38        | 2.24      | 1.57        | -1.46      | -2.53        | 3.63       | 4.03         | 1.89       | -1.74        |
| H2AFZ        | H2A histone family, member Z               | chr4q24                   | nucleosome assembly                                                  | Proteasome_Degradation // GenMAPP /// Proteasome             | 1.08          | 1.17            | -1.02     | 1.04        | -1.13     | -1.00       | -1.19      | -1.14        | 1.04       | -1.02        | 1.01       | -1.15        |
| H2BFS        | H2B histone family, member S               | chr21q22.3                | nucleosome assembly                                                  | ---                                                          | -1.11         | -1.03           | -1.05     | -1.09       | -1.01     | -1.05       | -1.04      | -1.04        | 1.55       | 1.45         | 1.75       | 1.68         |
| H3F3A        | H3 histone, family 3A                      | chr1q42.12                | 0                                                                    | ---                                                          | -1.06         | -1.03           | -1.02     | -1.11       | -1.05     | -1.02       | -1.06      | -1.08        | -1.11      | -1.11        | -1.17      | -1.24        |
| H3F3A /// H3 | H3 histone, family 3A /// H3               | chr17q25.1 /// chr17q25.1 | nucleosome assembly                                                  | ---                                                          | -1.02         | -1.03           | 1.05      | -1.09       | -1.01     | -1.04       | -1.01      | -1.03        | -1.10      | -1.11        | -1.24      | -1.35        |
| H3F3A /// H3 | H3 histone, family 3A /// H3               | chr17q25.1 /// chr17q25.1 | nucleosome assembly                                                  | ---                                                          | 1.02          | 1.04            | -1.05     | -1.01       | -1.04     | 1.02        | 1.02       | -1.04        | 1.18       | 1.01         | -1.06      | -1.16        |
| H3F3A /// H3 | H3 histone, family 3A /// H3               | chr17q25.1 /// chr17q25.1 | nucleosome assembly                                                  | ---                                                          | -1.05         | -1.04           | 1.10      | -1.07       | -1.02     | -1.04       | -1.02      | -1.07        | -1.09      | -1.10        | -1.22      | -1.34        |
| H3F3A /// H3 | H3 histone, family 3A /// H3               | chr17q25.1 /// chr17q25.1 | nucleosome assembly                                                  | ---                                                          | 1.11          | 1.09            | -1.02     | -1.13       | -1.02     | -1.00       | -1.03      | -1.05        | -1.13      | -1.05        | -1.18      | -1.19        |
| H3F3A /// H3 | H3 histone, family 3A /// H3               | chr17q25.1 /// chr17q25.1 | nucleosome assembly                                                  | ---                                                          | -1.04         | 1.04            | 1.05      | -1.02       | 1.07      | -1.09       | 1.16       | -1.03        | 1.82       | 1.48         | 1.71       | 1.54         |
| H3F3A /// H3 | H3 histone, family 3A /// H3               | chr17q25.1 /// chr17q25.1 | nucleosome assembly                                                  | ---                                                          | -1.05         | 1.00            | -1.01     | -1.03       | 1.07      | -1.03       | 1.13       | 1.02         | 1.64       | 1.41         | 1.59       | 1.43         |
| H3F3A /// H3 | H3 histone, family 3A /// H3               | chr17q25.1 /// chr17q25.1 | nucleosome assembly                                                  | ---                                                          | 1.13          | 1.05            | 1.12      | 1.12        | 1.02      | -1.03       | -1.37      | -1.17        | 1.82       | 1.56         | 1.46       | 1.68         |
| HAB1         | B1 for mucin                               | ---                       | 0                                                                    | ---                                                          | 1.19          | 1.09            | 2.92      | -1.55       | -1.40     | -1.18       | -1.83      | -2.66        | -1.86      | -1.11        | -1.38      | -1.84        |
| HABP4        | hyaluron binding protein                   | chr9q22.3-q31             | platelet degranulation                                               | ---                                                          | -1.21         | -1.20           | 1.03      | 1.21        | -1.08     | 1.09        | -1.03      | -1.13        | 1.18       | 1.05         | 1.33       | 1.63         |
| HABP4        | hyaluron binding protein                   | chr9q22.3-q31             | platelet degranulation                                               | ---                                                          | -1.36         | -1.06           | -1.05     | -1.06       | -1.14     | -1.20       | -1.28      | 1.11         | 1.49       | -1.05        | 2.00       | 2.23         |
| HABP4        | hyaluron binding protein                   | chr9q22.3-q31             | platelet degranulation                                               | ---                                                          | -1.12         | 1.11            | -1.03     | 1.01        | 1.12      | -1.16       | 1.16       | 1.05         | 1.35       | 1.10         | 2.16       | 2.13         |
| HACE1        | HECT domain and ankyrin repeat domain      | chr6q16.3                 | transcription, DNA-dependent                                         | ---                                                          | 1.39          | 1.34            | 1.05      | -1.01       | 1.03      | 1.06        | -1.21      | -1.04        | -1.89      | -1.72        | -1.55      | -1.76        |
| HADH         | hydroxyacyl-CoA dehydrogenase              | chr4q22-q26               | lipid metabolic process                                              | Fatty_Acid_Degradation // GenMAPP /// Fatty_Acid_Degradation | -1.09         | 1.02            | -1.02     | -1.19       | -1.07     | -1.21       | 1.17       | 1.16         | -1.18      | -1.10        | -1.38      | -1.22        |
| HADH         | hydroxyacyl-CoA dehydrogenase              | chr4q22-q26               | lipid metabolic process                                              | Fatty_Acid_Degradation // GenMAPP /// Fatty_Acid_Degradation | 1.02          | 1.03            | -1.01     | -1.02       | -1.03     | 1.01        | -1.03      | -1.07        | -1.31      | -1.16        | -1.44      | -1.48        |
| HADHB        | hydroxyacyl-CoA dehydrogenase              | chr2p23                   | lipid metabolic process                                              | Fatty_Acid_Degradation // GenMAPP                            | 1.01          | -1.00           | 1.05      | 1.04        | 1.04      | 1.05        | -1.05      | -1.04        | -1.16      | -1.01        | -1.23      | -1.08        |
| HAND1        | heart and neural crest development         | chr5q33                   | negative regulation of transcription from RNA polymerase II promoter | ---                                                          | -1.05         | 1.19            | -1.22     | -1.49       | -1.20     | -1.17       | -1.05      | -1.03        | -1.01      | -1.04        | -1.51      | -1.69        |
| HAPLN3       | hyaluronan and proteoglycan link protein 3 | chr15q26.1                | cell adhesion                                                        | ---                                                          | 1.45          | 3.19            | -1.90     | -1.96       | -1.10     | 1.25        | 2.27       | 1.90         | 2.85       | 2.49         | 3.01       | 1.77         |
| HAR1A        | highly accelerated region 1                | chr20q13.33               | 0                                                                    | ---                                                          | -3.46         | -2.13           | 1.12      | 1.39        | 3.52      | 2.05        | -1.61      | -3.91        | -1.10      | -1.01        | 2.22       | 2.31         |
| HA S3        | hyaluron synthase 3                        | chr16q22.1                | carbohydrate metabolic process                                       | ---                                                          | -1.05         | -1.06           | -1.06     | -1.06       | -1.08     | -1.10       | -1.11      | -1.00        | -1.23      | -1.08        | -1.08      | 1.00         |
| HAT1         | histone acetyltransferase 1                | chr2q31.2-q33.1           | DNA packaging                                                        | ---                                                          | 1.08          | 1.12            | -1.01     | -1.02       | 1.04      | -1.04       | -1.07      | -1.04        | -1.05      | -1.20        | -1.10      | -1.23        |
| HAUS1        | HAUS augmin-like complex                   | chr18q21.1                | cell cycle                                                           | ---                                                          | -1.04         | -1.03           | -1.01     | 1.03        | 1.07      | -1.04       | -1.10      | -1.05        | -1.49      | -1.50        | -1.51      | -1.49        |
| HAUS2        | HAUS augmin-like complex                   | chr15q15.2                | G2                                                                   | ---                                                          | 1.26          | 1.17            | 1.05      | 1.01        | 1.11      | 1.11        | -1.11      | 1.06         | 1.32       | 1.28         | 1.73       | 1.35         |
| HAUS2        | HAUS augmin-like complex                   | chr15q15.2                | G2                                                                   | ---                                                          | -1.03         | -1.11           | -1.04     | -1.06       | -1.01     | 1.12        | 1.22       | 1.20         | 1.31       | 1.06         | 1.56       | 1.50         |
| HAUS3        | HAUS augmin-like complex                   | chr4p16.3                 | cell cycle                                                           | ---                                                          | 1.14          | -1.11           | 1.07      | 1.10        | -1.06     | 1.12        | -1.29      | -1.02        | -1.43      | -1.19        | -1.16      | -1.18        |
| HAUS4 /// M  | HAUS augmin-like complex                   | chr14q11.2                | cell cycle                                                           | ---                                                          | -1.03         | 1.01            | -1.01     | 1.03        | -1.01     | -1.05       | 1.05       | -1.01        | -1.22      | -1.10        | -1.33      | -1.18        |
| HAUS5        | HAUS augmin-like complex                   | chr19q13.12               | cell cycle                                                           | ---                                                          | -1.07         | -1.00           | -1.11     | -1.06       | -1.06     | 1.09        | -1.20      | -1.01        | -1.91      | -1.39        | -1.80      | -1.77        |
| HAUS5        | HAUS augmin-like complex                   | chr19q13.12               | cell cycle                                                           | ---                                                          | 1.16          | 1.20            | -1.05     | 1.06        | 1.17      | 1.18        | -1.14      | 1.02         | -1.63      | -1.47        | -1.67      | -1.80        |
| HAUS5        | HAUS augmin-like complex                   | chr19q13.12               | cell cycle                                                           | ---                                                          | 1.09          | -1.12           | 1.10      | 1.38        | -1.00     | -1.05       | 1.21       | 1.26         | -1.23      | -1.24        | -1.85      | -1.81        |

| ID           | Gene Title                    | Chromosomal Location | 1st Gene Ontology Biological Process      | Pathway                               | A2497 30 mins | A2497P' 30 mins | A2497 2 h | A2497P' 2 h | A2497 4 h | A2497P' 4 h | A2497 24 h | A2497P' 24 h | A2497 48 h | A2497P' 48 h | A2497 72 h | A2497P' 72 h |
|--------------|-------------------------------|----------------------|-------------------------------------------|---------------------------------------|---------------|-----------------|-----------|-------------|-----------|-------------|------------|--------------|------------|--------------|------------|--------------|
| HAUS6        | HAUS augmin-like comple       | chr9p22.1            | cell cycle                                | ---                                   | -1.04         | -1.01           | -1.01     | -1.14       | -1.03     | 1.04        | 1.01       | 1.00         | -1.24      | 1.00         | -1.49      | -1.43        |
| HAUS6        | HAUS augmin-like comple       | chr9p22.1            | cell cycle                                | ---                                   | -1.09         | -1.13           | 1.29      | 1.18        | 1.22      | 1.12        | 1.58       | 1.16         | 1.33       | 1.61         | 1.66       | 1.57         |
| HAUS6        | HAUS augmin-like comple       | chr9p22.1            | DNA metabolic process                     | ---                                   | 1.05          | 1.01            | -1.01     | -1.07       | -1.01     | 1.10        | 1.03       | -1.03        | 1.05       | 1.22         | 1.18       | 1.12         |
| HAUST        | HAUS augmin-like comple       | chrXq28              | cell cycle                                | ---                                   | -1.03         | -1.07           | -1.03     | 1.10        | 1.06      | -1.04       | 1.07       | 1.17         | 1.44       | 1.18         | 1.23       | 1.41         |
| HAUST /// TR | HAUS augmin-like comple       | chrXq28              | DNA metabolic process                     | ---                                   | -1.19         | -1.29           | 1.04      | 1.14        | 1.07      | -1.05       | 1.01       | 1.11         | 1.29       | 1.05         | 1.31       | 1.46         |
| HAUS8        | HAUS augmin-like comple       | chr19p13.11          | cell cycle                                | ---                                   | 1.03          | 1.02            | 1.06      | -1.11       | 1.06      | 1.01        | -1.07      | -1.16        | 1.23       | 1.01         | 1.49       | 1.44         |
| HAVCR2       | hepatitis A virus cellular re | chr5q33.3            | 0                                         | ---                                   | -1.64         | -4.63           | 1.25      | -3.02       | 2.11      | 1.50        | 6.60       | 4.62         | -2.08      | -1.45        | 3.28       | 9.93         |
| HBA1 /// HB  | hemoglobin, alpha 1 /// hem   | chr16p13.3           | transport                                 | ---                                   | -1.85         | -1.33           | 1.26      | 1.42        | -1.18     | 1.08        | 1.23       | 1.26         | 2.13       | 2.06         | 3.31       | 2.56         |
| HBA1 /// HB  | hemoglobin, alpha 1 /// hem   | chr16p13.3           | transport                                 | ---                                   | -1.19         | 1.04            | -1.26     | -1.14       | -1.22     | 1.22        | 1.68       | 1.24         | 1.76       | 1.59         | 2.68       | 1.76         |
| HBA1 /// HB  | hemoglobin, alpha 1 /// hem   | chr16p13.3           | transport                                 | ---                                   | 1.27          | -1.20           | 1.16      | -1.18       | -1.03     | 1.14        | 1.30       | 1.09         | 2.19       | 2.26         | 2.34       | 2.01         |
| HBA1 /// HB  | hemoglobin, alpha 1 /// hem   | chr16p13.3           | transport                                 | ---                                   | -1.15         | -1.22           | 1.17      | 1.27        | -2.52     | -1.38       | 1.75       | 1.92         | 2.00       | 1.79         | 4.52       | 4.09         |
| HBA1 /// HB  | hemoglobin, alpha 1 /// hem   | chr16p13.3           | transport                                 | ---                                   | 1.06          | 1.33            | 1.38      | 1.25        | -1.37     | -1.89       | 1.49       | 1.29         | 3.12       | 3.15         | 3.54       | 2.95         |
| HBA1 /// HB  | hemoglobin, alpha 1 /// hem   | chr16p13.3           | transport                                 | ---                                   | -1.34         | -1.34           | 1.31      | -1.02       | -1.72     | 1.03        | 1.59       | 1.08         | 4.22       | 3.65         | 4.20       | 3.08         |
| HBEGF        | heparin-binding EGF-like g    | chr5q23              | signal transduction                       | Hypertrophy_model // GenMAPP          | -1.02         | -1.02           | -1.06     | -1.24       | 1.14      | 1.05        | 1.04       | 1.23         | 1.02       | 1.33         | 1.46       | 1.46         |
| HBEGF        | heparin-binding EGF-like g    | chr5q23              | signal transduction                       | Hypertrophy_model // GenMAPP          | -1.11         | -1.08           | -1.02     | -1.11       | 1.13      | -1.02       | 1.06       | -1.04        | 1.22       | -1.00        | 1.61       | 1.66         |
| HBPI         | HMG-box transcription fac     | chr7q22-q31          | transcription, DNA-dependent              | ---                                   | 1.06          | -1.22           | -1.16     | -1.65       | 1.40      | 1.21        | 1.45       | 1.46         | -1.03      | -1.00        | -1.26      | -1.49        |
| HBS1L        | HBS1-like (S. cerevisiae)     | chr6q23.3            | GTP catabolic process                     | ---                                   | 1.14          | 1.07            | 1.02      | 1.01        | -1.09     | 1.00        | -1.10      | -1.03        | 1.16       | 1.33         | 1.32       | 1.13         |
| HBS1L        | HBS1-like (S. cerevisiae)     | chr6q23.3            | GTP catabolic process                     | ---                                   | 1.05          | 1.05            | 1.05      | 1.08        | 1.03      | 1.06        | -1.02      | 1.07         | 1.22       | 1.45         | 1.36       | 1.22         |
| HBS1L        | HBS1-like (S. cerevisiae)     | chr6q23.3            | GTP catabolic process                     | ---                                   | 1.07          | 1.50            | 1.45      | 1.34        | 1.14      | 1.13        | -1.02      | 1.03         | -1.36      | -1.29        | -1.91      | -1.57        |
| HCA3R3       | hydroxycarboxylic acid rec    | chr12q23.31          | signal transduction                       | GPCRDB_Class_A_Rhodopsin-like2 // Gen | -2.25         | -1.30           | -1.13     | 1.32        | 3.80      | 1.94        | 13.88      | 7.72         | 60.78      | 49.85        | 14.70      | 18.97        |
| HCCS         | holocytochrome c synthase     | chrXp22.3            | organ morphogenesis                       | ---                                   | -1.03         | -1.04           | -1.01     | -1.05       | 1.05      | 1.03        | 1.21       | 1.09         | 1.44       | 1.32         | 1.43       | 1.41         |
| HCFC2        | host cell factor C2           | chr12q23.3           | negative regulation of transcription from | ---                                   | 1.15          | 1.08            | 1.15      | 1.13        | -1.05     | 1.14        | -1.87      | -1.78        | -1.05      | 1.30         | -1.80      | -1.93        |
| HCG11        | HLA complex group 11 (nc      | chr6p22.2            | 0                                         | ---                                   | 1.12          | 1.04            | 1.03      | -1.35       | 1.08      | 1.16        | -1.40      | -1.10        | -1.80      | -1.14        | -1.36      | -1.12        |
| HCG11        | HLA complex group 11 (nc      | chr6p22.2            | 0                                         | ---                                   | -1.05         | -1.13           | 1.06      | -1.26       | 1.08      | 1.28        | -1.55      | -1.09        | -1.76      | -1.20        | -1.76      | -1.32        |
| HCG18        | HLA complex group 18 (nc      | chr6p21.3            | 0                                         | ---                                   | -1.06         | -1.12           | -1.03     | 1.02        | 1.31      | 1.19        | 1.01       | -1.04        | -2.23      | -1.89        | -1.24      | -1.56        |
| HCG18        | HLA complex group 18 (nc      | chr6p21.3            | 0                                         | ---                                   | 1.08          | 1.14            | -1.10     | 1.06        | -1.19     | -1.04       | -1.15      | -1.00        | -3.07      | -1.84        | -2.16      | -2.26        |
| HCG18        | HLA complex group 18 (nc      | chr6p21.3            | 0                                         | ---                                   | -1.01         | -1.04           | 1.03      | 1.02        | 1.10      | 1.04        | -1.09      | -1.10        | -1.96      | -2.00        | -1.77      | -1.72        |
| HCG18        | HLA complex group 18 (nc      | chr6p21.3            | 0                                         | ---                                   | 1.07          | -1.24           | 1.13      | -1.17       | -1.24     | -1.21       | -1.02      | -1.89        | -1.82      | -2.15        | -1.71      | -1.71        |
| HCG18        | HLA complex group 18 (nc      | chr6p21.3            | 0                                         | ---                                   | 1.32          | 1.28            | -1.09     | 1.03        | -1.07     | 1.17        | -1.06      | -1.05        | -1.84      | -2.09        | -2.78      | -2.73        |
| HCG22        | HLA complex group 22 (nc      | chr6p21.33           | 0                                         | ---                                   | -2.60         | -2.98           | 1.09      | -1.81       | 1.06      | 2.22        | 1.10       | 1.11         | 1.11       | 1.84         | 1.20       | 2.65         |
| HCP5         | HLA complex P5 (non-pro       | chr6p21.3            | defense response                          | ---                                   | 1.13          | -1.01           | 1.03      | 1.28        | 1.00      | 1.04        | 1.03       | 1.04         | 1.41       | 1.35         | 1.26       | 1.40         |
| HCRP1        | hepatocellular carcinoma-r    | chr6p21.1            | 0                                         | ---                                   | 1.19          | -1.14           | -1.18     | -1.42       | 1.29      | 1.12        | -1.18      | 1.04         | -2.46      | -2.41        | -1.62      | -2.69        |
| HCR1         | hypocretin (orexin) neurop    | chr17q21             | phospholipase C-activating G-protein co   | ---                                   | -1.20         | -1.19           | -2.02     | -1.35       | 2.12      | 3.45        | -1.11      | -1.64        | 1.79       | -8.00        | -2.66      | ---          |
| HDAC1        | histone deacetylase 1         | chr1p34              | negative regulation of transcription from | Cell_cycle_KEGG // GenMAPP            | -1.08         | -1.04           | 1.02      | 1.06        | -1.00     | -1.02       | -1.01      | -1.04        | -1.16      | -1.11        | -1.36      | -1.22        |
| HDAC10       | histone deacetylase 10        | chr22q13.31          | negative regulation of transcription from | ---                                   | 1.16          | 1.03            | -1.70     | -1.37       | 1.28      | 2.72        | 2.24       | 1.07         | -2.28      | -1.09        | -1.26      | 1.28         |
| HDAC2        | histone deacetylase 2         | chr6p21              | negative regulation of transcription from | Cell_cycle_KEGG // GenMAPP            | -1.06         | -1.03           | 1.13      | 1.05        | -1.07     | -1.05       | -1.04      | 1.09         | -1.57      | -1.72        | -1.87      | -2.33        |
| HDAC3        | histone deacetylase 3         | chr5q31              | negative regulation of transcription from | Cell_cycle_KEGG // GenMAPP            | -1.13         | -1.05           | -1.01     | -1.03       | 1.05      | 1.02        | 1.05       | 1.10         | 1.03       | 1.09         | -1.25      | 1.03         |
| HDAC4        | histone deacetylase 4         | chr2q37.3            | negative regulation of transcription from | Cell_cycle_KEGG // GenMAPP            | -1.07         | -1.14           | -1.05     | 1.08        | 1.01      | 1.10        | -1.07      | -1.01        | -1.68      | -1.54        | -1.80      | -1.62        |
| HDAC4        | histone deacetylase 4         | chr2q37.3            | negative regulation of transcription from | Cell_cycle_KEGG // GenMAPP            | 1.26          | -1.04           | -1.03     | 1.23        | 1.12      | -1.12       | 1.22       | -1.12        | 1.71       | 2.04         | 1.58       | 2.51         |
| HDAC4        | histone deacetylase 4         | chr2q37.3            | negative regulation of transcription from | Cell_cycle_KEGG // GenMAPP            | 1.00          | 1.05            | 1.08      | 1.05        | -1.13     | 1.06        | -1.19      | -1.19        | -1.80      | -1.49        | -2.07      | -1.81        |
| HDAC5        | histone deacetylase 5         | chr17q21             | negative regulation of transcription from | Cell_cycle_KEGG // GenMAPP            | 1.74          | 1.53            | -1.06     | 1.24        | -2.35     | -2.06       | 1.10       | 1.20         | 1.60       | 2.32         | -1.40      | 1.23         |
| HDAC6        | histone deacetylase 6         | chrXp11.23           | protein polyubiquitination                | Cell_cycle_KEGG // GenMAPP            | -1.02         | -1.12           | 1.06      | 1.16        | -1.06     | -1.14       | 1.02       | 1.13         | 1.08       | 1.08         | 1.08       | 1.55         |
| HDAC9        | histone deacetylase 9         | chr7p21.1            | negative regulation of transcription from | ---                                   | 1.53          | 1.84            | -1.81     | -1.87       | -1.25     | 1.13        | 2.77       | 2.42         | -1.13      | -1.23        | -1.62      | 1.77         |
| HDC          | histidine decarboxylase       | chr15q21-q22         | histamine metabolic process               | Biogenic_Amine_Synthesis // GenMAPP   | -2.86         | -1.01           | 1.87      | 2.04        | -1.50     | -4.26       | -2.62      | -1.34        | 1.15       | -1.21        | 2.22       | 2.52         |
| HDDC2        | HD domain containing 2        | chr6q13-q24.3        | metabolic process                         | ---                                   | 1.03          | 1.07            | -1.05     | 1.10        | 1.14      | 1.10        | -1.12      | 1.27         | -1.26      | -1.12        | -2.42      | -1.88        |
| HDDC3        | HD domain containing 3        | chr15q26.1           | metabolic process                         | ---                                   | -1.00         | 1.03            | 1.02      | -1.11       | -1.04     | -1.06       | 1.03       | 1.01         | 1.14       | 1.01         | 1.13       | 1.31         |
| HDGFRP3      | hepatoma-derived growth f     | chr15q25.2           | cell proliferation                        | ---                                   | 1.01          | -1.04           | -1.33     | -1.15       | -1.22     | 1.14        | -1.28      | -1.05        | -1.46      | -1.17        | -1.48      | -1.87        |
| HDLBP        | high density lipoprotein bin  | chr2q37.3            | lipid metabolic process                   | ---                                   | 1.00          | 1.00            | -1.05     | -1.04       | 1.04      | 1.00        | 1.11       | -1.05        | 1.08       | -1.06        | 1.10       | 1.35         |
| HDLBP        | high density lipoprotein bin  | chr2q37.3            | lipid metabolic process                   | ---                                   | -1.01         | 1.10            | -1.13     | -1.10       | -1.06     | 1.07        | 1.06       | 1.01         | 1.19       | 1.03         | 1.21       | 1.43         |
| HDLBP        | high density lipoprotein bin  | chr2q37.3            | lipid metabolic process                   | ---                                   | -1.28         | -1.32           | -1.11     | 1.04        | -1.17     | -1.11       | 1.01       | 1.04         | 1.35       | 1.31         | 1.29       | 1.62         |
| HDLBP        | high density lipoprotein bin  | chr2q37.3            | lipid metabolic process                   | ---                                   | 1.02          | -1.08           | -1.02     | 1.09        | -1.04     | -1.02       | 1.18       | 1.14         | 1.09       | -1.02        | 1.16       | 1.32         |
| HEATR1       | HEAT repeat containing 1      | chr1q43              | rRNA processing                           | ---                                   | -1.01         | -1.05           | -1.05     | -1.02       | -1.04     | -1.03       | 1.01       | 1.02         | -1.13      | -1.11        | 1.07       | 1.14         |
| HEATR1       | HEAT repeat containing 1      | chr1q43              | rRNA processing                           | ---                                   | -1.09         | -1.07           | -1.09     | -1.02       | -1.02     | -1.05       | -1.02      | 1.10         | -1.55      | -1.55        | -1.49      | -1.23        |
| HEATR2       | HEAT repeat containing 2      | chr7p22.3            | ---                                       | ---                                   | -1.10         | -1.09           | 1.01      | -1.02       | 1.04      | 1.02        | 1.04       | -1.03        | -1.16      | -1.12        | -1.36      | -1.21        |
| HEATR3       | HEAT repeat containing 3      | chr16q12.1           | 0                                         | ---                                   | -1.11         | 1.00            | 1.08      | -1.10       | -1.18     | -1.12       | -1.06      | 1.10         | -1.76      | -1.61        | -1.20      | -1.23        |
| HEATR5A      | HEAT repeat containing 5A     | chr14q12             | 0                                         | ---                                   | 1.20          | 1.15            | -1.09     | -1.05       | -1.17     | 1.15        | -1.47      | -1.21        | -1.59      | -1.39        | -1.36      | -1.51        |
| HEATR6       | HEAT repeat containing 6      | chr17q23.1           | 0                                         | ---                                   | 1.10          | -1.06           | -1.02     | 1.09        | -1.00     | -1.06       | 1.30       | 1.11         | 1.14       | -1.02        | 1.24       | 1.46         |
| HEATR6       | HEAT repeat containing 6      | chr17q23.1           | 0                                         | ---                                   | -1.03         | -1.09           | -1.10     | -1.01       | 1.00      | -1.03       | 1.12       | 1.10         | -1.00      | 1.06         | 1.11       | 1.43         |
| HEATR8-T1    | HEATR8-ITC4 readthrough       | chr1p /// chr1p32.3  | 0                                         | ---                                   | -1.03         | -1.07           | -1.07     | 1.07        | 1.04      | 1.02        | -1.05      | 1.12         | 1.31       | 1.13         | 1.35       | 1.46         |
| HEBP2        | heme binding protein 2        | chr6q24              | 0                                         | ---                                   | -1.04         | -1.03           | 1.03      | 1.04        | -1.03     | -1.07       | 1.13       | 1.18         | 1.39       | 1.33         | 1.30       | 1.32         |
| HECA         | headcase homolog (Drosop      | chr6q23-q24          | multicellular organismal development      | ---                                   | -1.03         | 1.00            | 1.03      | 1.07        | -1.00     | -1.01       | 1.07       | 1.01         | 1.03       | 1.05         | 1.23       | 1.18         |
| HECTD1       | HECT domain containing 1      | chr14q12             | neural tube closure                       | ---                                   | -1.09         | 1.01            | -1.05     | -1.27       | -1.01     | -1.05       | -1.22      | -1.26        | -1.42      | -1.18        | -1.07      | -1.16        |
| HECTD2       | HECT domain containing 2      | chr10q23.32          | cellular protein modification process     | ---                                   | 1.21          | 1.18            | -1.02     | -1.07       | -1.00     | 1.05        | -1.14      | -1.01        | -2.22      | -2.34        | -2.87      | -3.23        |
| HECTD2       | HECT domain containing 2      | chr10q23.32          | protein ubiquitination                    | ---                                   | -1.01         | -1.08           | -1.02     | -1.00       | 1.09      | 1.08        | 1.14       | -1.07        | -1.14      | 1.07         | -1.84      | -1.97        |
| HECTD4       | HECT domain containing 4      | chr12q24.13          | cellular protein modification process     | ---                                   | -1.06         | -1.16           | 1.06      | 1.10        | 1.03      | -1.06       | -1.08      | 1.05         | -1.11      | 1.04         | -1.29      | -1.23        |
| HECW2        | HECT, C2 and WW domain        | chr2q32.3            | cellular protein modification process     | ---                                   | -1.14         | -1.09           | 1.03      | 1.16        | -1.06     | -1.23       | -1.12      | -1.20        | -1.74      | -1.60        | -1.29      | -1.12        |



| ID        | Gene Title                                      | Chromosomal Location | 1st Gene Ontology Biological Process                | Pathway                                 | A2497 30 mins | A2497P' 30 mins | A2497 2 h | A2497P' 2 h | A2497 4 h | A2497P' 4 h | A2497 24 h | A2497P' 24 h | A2497 48 h | A2497P' 48 h | A2497 72 h | A2497P' 72 h |
|-----------|-------------------------------------------------|----------------------|-----------------------------------------------------|-----------------------------------------|---------------|-----------------|-----------|-------------|-----------|-------------|------------|--------------|------------|--------------|------------|--------------|
| HIRA      | histone cell cycle regulator                    | chr22q11.21          | osteoblast differentiation                          | ---                                     | 1.19          | 1.16            | -1.14     | -1.02       | 1.07      | -1.31       | 1.02       | 1.22         | -1.62      | -1.66        | -1.22      | -1.31        |
| HIRIP3    | HIRA interacting protein 3                      | chr16p11.2           | chromatin assembly or disassembly                   | ---                                     | -1.03         | -1.09           | -1.02     | -1.07       | -1.07     | -1.05       | -1.10      | 1.01         | -1.43      | -1.27        | -1.32      | -1.13        |
| HIRIP3    | HIRA interacting protein 3                      | chr16p11.2           | chromatin assembly or disassembly                   | ---                                     | 1.24          | 1.09            | 1.12      | -1.06       | 1.09      | -1.05       | 1.25       | 1.09         | -1.57      | -1.54        | -1.74      | -1.62        |
| HIST1H1C  | histone cluster 1, H1c                          | chr6p21.3            | nucleosome assembly                                 | ---                                     | -1.06         | -1.12           | -1.01     | 1.10        | -1.11     | -1.20       | 1.18       | 1.17         | 1.23       | 1.13         | 1.62       | 1.64         |
| HIST1H2AB | histone cluster 1, H2ab                         | chr6p22.1            | nucleosome assembly                                 | ---                                     | -1.10         | -1.08           | -1.00     | 1.03        | -1.06     | -1.12       | 1.01       | -1.04        | 1.30       | 1.17         | 1.88       | 1.75         |
| HIST1H2AC | histone cluster 1, H2ac                         | chr6p22.1            | nucleosome assembly                                 | ---                                     | 1.03          | 1.04            | -1.00     | 1.03        | 1.03      | 1.05        | -1.13      | -1.14        | -1.28      | -1.04        | -1.54      | -1.55        |
| HIST1H2AG | histone cluster 1, H2ag                         | chr6p21.33           | nucleosome assembly                                 | ---                                     | -1.00         | 1.02            | 1.08      | -1.04       | -1.05     | -1.05       | 1.04       | 1.01         | 1.06       | 1.17         | 1.37       | 1.21         |
| HIST1H2AG | histone cluster 1, H2ag                         | chr6p21.33           | nucleosome assembly                                 | ---                                     | -1.04         | -1.00           | -1.06     | 1.01        | -1.06     | -1.09       | -1.24      | -1.01        | -2.33      | -1.61        | -1.10      | -1.14        |
| HIST1H2BC | histone cluster 1, H2bc                         | chr6p22.1            | nucleosome assembly                                 | ---                                     | -1.18         | -1.08           | 1.12      | -1.06       | -1.07     | 1.15        | -1.18      | 1.14         | -1.37      | 1.07         | -1.30      | 1.20         |
| HIST1H2BC | histone cluster 1, H2bc                         | chr6p21.3            | nucleosome assembly                                 | ---                                     | -1.01         | -1.07           | 1.04      | 1.05        | 1.03      | 1.15        | -1.01      | -1.07        | 1.33       | 1.32         | 1.75       | 1.68         |
| HIST1H2BC | histone cluster 1, H2bc                         | chr6p21.3            | nucleosome assembly                                 | ---                                     | 1.05          | -1.06           | -1.00     | 1.05        | -1.00     | 1.09        | -1.10      | -1.13        | 1.22       | 1.27         | 2.05       | 1.87         |
| HIST1H2BC | histone cluster 1, H2bc                         | chr6p21.3            | nucleosome assembly                                 | ---                                     | 1.17          | -1.17           | -1.19     | -1.10       | 1.11      | 1.37        | 1.22       | 1.16         | 1.54       | 2.35         | 2.87       | 1.92         |
| HIST1H2BC | histone cluster 1, H2bc                         | chr6p21.3            | nucleosome assembly                                 | ---                                     | -1.17         | -1.36           | -1.34     | -1.42       | -1.02     | -1.06       | -1.10      | -1.15        | 1.36       | 1.60         | 1.91       | 1.87         |
| HIST1H2BC | histone cluster 1, H2bc                         | chr6p21.3            | nucleosome assembly                                 | ---                                     | -1.31         | -1.21           | -1.09     | -1.12       | 1.05      | -1.08       | -1.14      | -1.06        | 1.22       | 1.31         | 1.42       | 1.42         |
| HIST1H2BD | histone cluster 1, H2bd                         | chr6p21.3            | nucleosome assembly                                 | ---                                     | -1.09         | 1.09            | -1.10     | -1.12       | -1.02     | -1.17       | -1.07      | -1.02        | 1.15       | 1.10         | 1.64       | 1.42         |
| HIST1H2BD | histone cluster 1, H2bd                         | chr6p21.3            | nucleosome assembly                                 | ---                                     | -1.02         | 1.01            | 1.07      | -1.02       | 1.06      | -1.14       | -1.07      | -1.06        | -1.17      | 1.07         | 1.49       | 1.58         |
| HIST1H2BH | histone cluster 1, H2bh                         | chr6p21.3            | nucleosome assembly                                 | ---                                     | 1.05          | -1.08           | 1.01      | -1.01       | 1.01      | 1.09        | -1.12      | -1.01        | 1.19       | 1.38         | 1.57       | 1.53         |
| HIST1H2BJ | histone cluster 1, H2bj                         | chr6p22.1            | nucleosome assembly                                 | ---                                     | 1.54          | 1.25            | 1.01      | -1.18       | -1.01     | -1.05       | -1.24      | -1.23        | 2.07       | 1.65         | 4.07       | 4.29         |
| HIST1H2BK | histone cluster 1, H2bk                         | chr6p21.33           | nucleosome assembly                                 | ---                                     | -1.05         | -1.06           | -1.02     | -1.03       | -1.04     | -1.00       | -1.10      | -1.05        | 1.35       | 1.42         | 1.37       | 1.36         |
| HIST1H2BL | histone cluster 1, H2bl                         | chr6p22.1            | nucleosome assembly                                 | ---                                     | 1.16          | 1.11            | 1.34      | -1.02       | 2.70      | 1.23        | -1.06      | -1.20        | 1.13       | -1.02        | 1.26       | 1.05         |
| HIST1H2BN | histone cluster 1, H2bn                         | chr6p22.1            | nucleosome assembly                                 | Circadian_Exercise // GenMAPP           | -1.08         | 1.15            | -1.05     | 1.18        | -1.20     | 1.04        | 1.53       | 1.55         | 1.17       | 1.00         | 2.04       | 2.00         |
| HIST1H3A  | histone cluster 1, H3a                          | chr6p22.1            | nucleosome assembly                                 | ---                                     | 1.03          | -1.15           | 1.21      | 1.49        | 1.57      | 1.38        | -1.77      | -1.03        | 1.90       | 1.16         | 2.05       | 1.84         |
| HIST1H3A  | histone cluster 1, H3a                          | chr6p22.1            | nucleosome assembly                                 | ---                                     | -1.20         | -1.04           | -1.53     | -1.76       | -1.15     | 1.24        | -1.42      | -1.01        | 1.37       | -1.21        | -2.02      | -1.76        |
| HIST1H3A  | histone cluster 1, H3a                          | chr6p22.1            | nucleosome assembly                                 | ---                                     | -1.04         | -1.15           | -1.48     | -1.64       | -1.02     | -1.00       | -1.61      | -1.06        | -1.91      | -1.71        | -1.87      | -1.58        |
| HIST1H3F  | histone cluster 1, H3f                          | chr6p22.2            | nucleosome assembly                                 | ---                                     | -1.13         | -1.03           | -1.23     | -1.03       | -1.05     | 1.00        | -1.02      | 1.05         | -1.06      | -1.04        | 1.03       | 1.17         |
| HIST1H3H  | histone cluster 1, H3h                          | chr6p22.1            | nucleosome assembly                                 | ---                                     | -1.04         | -1.06           | 1.00      | -1.03       | -1.10     | -1.11       | -1.11      | 1.03         | -1.58      | -1.52        | -1.00      | 1.04         |
| HIST1H4A  | histone cluster 1, H4a                          | chr12p12.3           | telomere maintenance                                | ---                                     | 1.05          | 1.05            | -1.18     | -1.35       | -1.09     | 1.15        | 1.07       | 1.27         | 1.30       | -1.07        | 1.36       | 1.56         |
| HIST1H4A  | histone cluster 1, H4a                          | chr12p12.3           | telomere maintenance                                | ---                                     | -1.27         | -1.29           | 1.24      | 1.32        | 1.15      | 1.16        | -1.05      | 1.25         | -1.81      | -1.39        | 1.74       | 1.83         |
| HIST1H4A  | histone cluster 1, H4a                          | chr12p12.3           | telomere maintenance                                | ---                                     | -1.10         | -1.16           | 1.16      | 1.35        | -1.03     | 1.26        | -1.13      | -1.33        | -1.21      | -1.21        | -1.02      | 1.04         |
| HIST2H2AA | histone cluster 2, H2aa3                        | chr1q21.2            | nucleosome assembly                                 | ---                                     | -1.15         | -1.07           | -1.02     | -1.13       | 1.11      | 1.08        | -1.02      | -1.24        | 1.27       | 1.28         | 1.58       | 1.44         |
| HIST2H2AA | histone cluster 2, H2aa3                        | chr1q21.2            | nucleosome assembly                                 | ---                                     | -1.18         | -1.08           | -1.02     | -1.11       | 1.11      | 1.01        | -1.02      | -1.15        | 1.26       | 1.21         | 1.50       | 1.46         |
| HIST2H2BE | histone cluster 2, H2be                         | chr1q21.2            | nucleosome assembly                                 | ---                                     | 1.01          | -1.02           | -1.14     | -1.07       | -1.07     | 1.05        | -1.03      | -1.14        | 1.14       | 1.41         | 1.02       | 1.11         |
| HIST3H2A  | histone cluster 3, H2a                          | chr1q42.13           | nucleosome assembly                                 | ---                                     | 1.03          | 1.03            | 1.01      | -1.07       | 1.11      | 1.01        | 1.23       | 1.05         | -1.01      | 1.09         | -1.02      | -1.17        |
| HIVEP1    | human immunodeficiency                          | chr6p24-p23          | negative regulation of transcription from           | ---                                     | 1.39          | 1.15            | 1.06      | 1.17        | -1.20     | -1.09       | -1.28      | -1.11        | 1.17       | 1.01         | 1.43       | 1.00         |
| HIVEP2    | human immunodeficiency                          | chr6q23-q24          | transcription, DNA-dependent                        | ---                                     | -1.10         | 1.03            | 1.00      | -1.34       | -1.02     | 1.04        | 1.10       | 1.13         | 1.13       | 1.39         | 1.33       | 1.54         |
| HIVEP2    | human immunodeficiency                          | chr6q23-q24          | transcription, DNA-dependent                        | ---                                     | -1.09         | 1.00            | 1.03      | -1.23       | -1.07     | 1.05        | 1.26       | 1.20         | 1.18       | 1.34         | 1.24       | 1.33         |
| HJURP     | Holliday junction recognition                   | chr2q37.1            | nucleosome assembly                                 | ---                                     | 1.10          | 1.11            | 1.07      | 1.03        | 1.16      | 1.02        | -1.17      | -1.01        | 2.06       | 1.78         | 2.56       | 2.37         |
| HK1       | hexokinase 1                                    | chr10q22             | cellular glucose homeostasis                        | Glycolysis_and_Gluconeogenesis // GenMA | -1.32         | -1.09           | -1.02     | 1.06        | -1.25     | -1.36       | 1.40       | 1.25         | 2.11       | 1.70         | 1.50       | 2.12         |
| HK2       | hexokinase 2                                    | chr2p13              | cellular glucose homeostasis                        | ---                                     | -1.14         | -1.28           | -1.27     | -1.06       | -1.04     | -1.06       | -1.14      | 1.29         | -3.30      | -4.93        | -6.68      | -6.65        |
| HK2       | hexokinase 2                                    | chr2p13              | cellular glucose homeostasis                        | Glycolysis_and_Gluconeogenesis // GenMA | 1.15          | 1.12            | -1.04     | 1.02        | -1.23     | -1.02       | 1.07       | -1.01        | 1.52       | 1.88         | 1.82       | 2.19         |
| HKR1      | HLK1, GLI-Kruppel zinc finger                   | chr19q13.12          | transcription, DNA-dependent                        | ---                                     | 1.05          | -1.21           | -1.05     | 1.10        | 1.15      | 1.04        | 1.07       | 1.08         | 1.00       | -1.07        | 1.46       | 1.62         |
| HLA-DMA   | major histocompatibility complex class II, DMA  | chr6p21.3            | antigen processing and presentation of peptide      | Circadian_Exercise // GenMAPP           | -1.06         | -1.11           | 1.06      | 1.14        | -1.08     | -1.05       | 1.11       | 1.07         | -1.09      | -1.03        | 1.01       | 1.14         |
| HLA-DMB   | major histocompatibility complex class II, DMB  | chr6p21.3            | antigen processing and presentation of peptide      | ---                                     | -1.24         | -1.49           | -1.22     | -1.30       | 1.18      | 1.08        | -1.07      | 1.19         | 1.10       | 1.43         | 1.17       | 1.40         |
| HLA-DOA   | major histocompatibility complex class II, DOA  | chr6p21.3            | antigen processing and presentation of peptide      | ---                                     | -2.51         | -2.12           | -1.20     | 1.51        | -2.10     | -1.82       | 1.60       | 1.15         | 4.50       | 5.41         | -2.11      | -1.74        |
| HLA-DQA1  | major histocompatibility complex class II, DQA1 | chr6p21.3            | antigen processing and presentation of peptide      | ---                                     | -2.50         | -2.26           | -1.25     | 1.69        | 3.15      | 4.44        | -2.32      | 1.09         | -1.49      | -1.01        | 2.20       | 1.43         |
| HLA-DQA1  | major histocompatibility complex class II, DQA1 | chr6p21.3            | antigen processing and presentation of peptide      | ---                                     | 1.12          | -1.30           | 1.02      | 1.27        | 1.51      | 1.83        | 1.27       | 1.06         | 2.23       | 1.59         | 1.48       | 1.73         |
| HLA-DQB1  | major histocompatibility complex class II, DQB1 | chr6p21.3            | immunoglobulin production involved in               | ---                                     | 4.29          | -2.28           | 2.21      | 4.17        | 4.03      | -1.57       | 8.19       | 2.48         | 2.13       | 2.81         | 1.88       | 1.41         |
| HLA-DQB1  | major histocompatibility complex class II, DQB1 | chr6p21.3            | immunoglobulin production involved in               | ---                                     | 1.19          | 1.26            | -1.01     | -1.02       | 1.13      | 1.17        | 1.07       | -1.20        | 1.19       | 1.26         | 1.83       | 2.53         |
| HLA-DQB1  | major histocompatibility complex class II, DQB1 | chr6p21.3            | immunoglobulin production involved in               | ---                                     | -1.07         | -1.21           | -1.14     | 1.09        | -1.04     | -1.46       | 1.39       | 1.05         | 1.16       | 1.35         | 1.74       | 2.16         |
| HLA-DQB1  | major histocompatibility complex class II, DQB1 | chr6p21.3            | immunoglobulin production involved in               | ---                                     | -2.05         | -2.31           | 1.35      | 1.51        | 1.14      | 2.35        | -1.07      | 1.06         | 1.23       | -1.00        | 1.25       | 1.74         |
| HLA-DQB1  | major histocompatibility complex class II, DQB1 | chr6p21.3            | immunoglobulin production involved in               | ---                                     | 1.09          | -1.21           | 1.08      | 1.27        | 1.05      | -1.22       | 1.46       | 1.12         | 1.57       | 1.49         | 1.68       | 2.16         |
| HLA-DQB1  | major histocompatibility complex class II, DQB1 | chr6p21.3            | immunoglobulin production involved in               | ---                                     | 1.18          | -1.08           | -1.01     | -1.08       | 1.28      | 1.29        | 1.37       | 1.27         | 1.48       | 1.49         | 1.37       | 1.78         |
| HLA-DQB1  | major histocompatibility complex class II, DQB1 | chr6p21.3            | immunoglobulin production involved in               | ---                                     | 2.47          | 1.17            | 1.24      | 3.63        | -3.18     | -1.23       | 1.52       | -1.15        | 2.09       | 4.23         | 1.66       | 2.96         |
| HLA-DRA   | major histocompatibility complex class II, DRA  | chr6p21.3            | antigen processing and presentation of peptide      | ---                                     | 1.10          | 1.07            | -1.10     | -1.15       | 1.07      | 1.02        | 1.23       | -1.06        | 1.05       | 1.15         | 1.31       | 1.26         |
| HLA-DRA   | major histocompatibility complex class II, DRA  | chr6p21.3            | antigen processing and presentation of peptide      | ---                                     | -1.06         | 1.04            | 1.28      | 1.10        | 1.13      | 1.16        | 1.17       | -1.16        | 1.12       | 1.01         | 1.32       | 1.45         |
| HLA-DRB1  | major histocompatibility complex class II, DRB1 | chr6p21.3            | immunoglobulin production involved in               | ---                                     | -1.08         | 1.42            | -1.12     | -1.10       | 1.15      | 1.62        | -1.29      | -1.11        | 1.07       | 1.20         | 1.55       | 1.97         |
| HLA-DRB1  | major histocompatibility complex class II, DRB1 | chr6p21.3            | immunoglobulin production involved in               | ---                                     | -1.17         | -1.25           | -1.08     | -1.03       | 1.31      | 1.04        | 1.16       | -1.07        | 1.69       | 1.52         | 1.53       | 1.68         |
| HLA-DRB1  | major histocompatibility complex class II, DRB1 | chr6p21.3            | immunoglobulin production involved in               | ---                                     | -1.02         | -1.06           | 1.04      | 1.08        | -1.03     | -1.20       | 1.29       | 1.17         | 1.61       | 1.42         | 1.47       | 1.58         |
| HLA-DRB1  | major histocompatibility complex class II, DRB1 | chr6p21.3            | immunoglobulin production involved in               | ---                                     | -1.04         | -1.17           | -1.16     | 1.08        | 1.14      | 1.01        | 1.06       | 1.01         | 1.56       | 1.51         | 1.43       | 1.62         |
| HLA-DRB1  | major histocompatibility complex class II, DRB1 | chr6p21.3            | immunoglobulin production involved in               | ---                                     | -1.08         | -1.12           | -1.06     | -1.00       | -1.06     | -1.29       | 1.12       | 1.06         | 1.29       | 1.33         | 1.20       | 1.39         |
| HLA-DRB4  | major histocompatibility complex class II, DRB4 | chr6p21.3            | immunoglobulin production involved in               | ---                                     | -1.07         | -2.00           | -3.23     | -2.14       | -1.19     | 1.28        | -3.06      | -1.16        | -1.91      | -3.52        | 4.26       | 1.08         |
| HLA-DRB6  | major histocompatibility complex class II, DRB6 | chr6p21.3            | 0                                                   | ---                                     | -1.03         | -1.02           | -1.07     | 1.37        | 1.12      | 1.05        | 1.03       | 1.03         | 1.23       | 1.11         | 1.82       | 1.71         |
| HLA-E     | major histocompatibility complex class I, E     | chr6p21.3            | positive regulation of T cell mediated cytotoxicity | Proteasome_Degradation // GenMAPP       | -1.12         | -1.11           | 1.02      | 1.03        | 1.12      | 1.05        | 1.19       | 1.07         | 1.48       | 1.27         | 1.61       | 1.65         |
| HLA-E     | major histocompatibility complex class I, E     | chr6p21.3            | positive regulation of T cell mediated cytotoxicity | Proteasome_Degradation // GenMAPP       | -1.03         | 1.04            | -1.02     | 1.17        | -1.14     | 1.06        | 1.12       | 1.21         | 1.23       | 1.58         | 1.40       | 1.55         |
| HLA-E     | major histocompatibility complex class I, E     | chr6p21.3            | positive regulation of T cell mediated cytotoxicity | Proteasome_Degradation // GenMAPP       | -1.03         | -1.07           | 1.03      | 1.03        | -1.01     | -1.13       | 1.35       | 1.17         | 1.61       | 1.39         | 1.70       | 1.78         |
| HLA-F     | major histocompatibility complex class I, F     | chr6p21.3            | positive regulation of T cell mediated cytotoxicity | Proteasome_Degradation // GenMAPP       | -1.06         | 1.01            | 1.04      | -1.05       | -1.10     | 1.36        | 2.03       | 1.13         | 1.25       | 1.54         | 1.54       | 1.55         |

| ID       | Gene Title                              | Chromosomal Location      | 1st Gene Ontology Biological Process                                 | Pathway                                    | A2497 30 mins | A2497P' 30 mins | A2497 2 h | A2497P' 2 h | A2497 4 h | A2497P' 4 h | A2497 24 h | A2497P' 24 h | A2497 48 h | A2497P' 48 h | A2497 72 h | A2497P' 72 h |
|----------|-----------------------------------------|---------------------------|----------------------------------------------------------------------|--------------------------------------------|---------------|-----------------|-----------|-------------|-----------|-------------|------------|--------------|------------|--------------|------------|--------------|
| HLCS     | holocarboxylase synthetase              | chr21q22.13               | cellular protein modification process                                | ---                                        | 1.02          | -1.18           | 1.25      | 1.80        | 1.07      | -1.06       | -1.01      | 1.02         | -1.41      | -1.37        | -1.63      | -1.37        |
| HLCS     | holocarboxylase synthetase              | chr21q22.13               | cellular protein modification process                                | ---                                        | -1.00         | 1.04            | 1.03      | 1.10        | -1.00     | -1.14       | 1.28       | -1.04        | -1.81      | -1.88        | -1.54      | -1.10        |
| HLF      | hepatic leukemia factor                 | chr17q22                  | transcription, DNA-dependent                                         | ---                                        | -1.67         | -4.74           | 2.17      | 2.45        | -1.62     | -1.52       | 1.99       | -1.13        | 1.37       | 1.43         | 1.09       | 1.11         |
| HLF      | hepatic leukemia factor                 | chr17q22                  | transcription, DNA-dependent                                         | ---                                        | 1.46          | 1.25            | -1.66     | -1.33       | -1.43     | -1.29       | 1.06       | 1.30         | -1.65      | -1.46        | -1.29      | -1.10        |
| HLF      | hepatic leukemia factor                 | chr17q22                  | transcription, DNA-dependent                                         | ---                                        | -1.04         | -1.14           | 1.56      | 1.66        | 3.18      | 3.16        | -1.25      | -1.02        | -2.45      | -1.07        | 1.30       | 1.08         |
| HLTF     | helicase-like transcription factor      | chr3q25.1-q26.1           | ATP catabolic process                                                | ---                                        | 1.13          | 1.19            | 1.02      | -1.04       | -1.01     | -1.03       | -1.07      | -1.09        | -1.38      | -1.36        | -1.21      | -1.46        |
| HM13     | histocompatibility (minor)              | chr20q11.21               | proteolysis                                                          | ---                                        | -1.02         | -1.03           | -1.03     | -1.04       | 1.14      | 1.00        | 1.12       | -1.04        | 1.20       | -1.09        | 1.24       | 1.36         |
| HM13     | histocompatibility (minor)              | chr20q11.21               | proteolysis                                                          | ---                                        | -1.01         | -1.33           | -1.05     | -1.02       | -1.31     | -1.21       | -1.05      | 1.03         | -1.04      | -1.13        | 1.09       | 1.14         |
| HMG20B   | high mobility group 20B                 | chr19p13.3                | chromatin organization                                               | ---                                        | -1.25         | -1.41           | -1.00     | -1.18       | 1.43      | 1.62        | 1.22       | -1.04        | 1.86       | 1.32         | 1.47       | 1.76         |
| HMG20B   | high mobility group 20B                 | chr19p13.3                | chromatin organization                                               | ---                                        | 1.03          | -1.05           | 1.06      | 1.17        | -1.01     | -1.02       | 1.14       | 1.16         | 1.84       | 1.48         | 1.55       | 1.56         |
| HMG20B   | high mobility group 20B                 | chr19p13.3                | chromatin organization                                               | ---                                        | -1.11         | -1.04           | 1.10      | -1.09       | 1.11      | 1.13        | 1.01       | -1.12        | 1.74       | 1.64         | 1.36       | 1.33         |
| HMG1     | high mobility group AT-hook             | chr6p21                   | DNA unwinding involved in replication                                | ---                                        | -1.04         | -1.02           | -1.01     | 1.04        | -1.00     | -1.03       | 1.14       | 1.00         | 1.40       | 1.10         | 1.06       | -1.03        |
| HMG1     | high mobility group box 1               | chr13q12                  | negative regulation of transcription from RNA polymerase II promoter | ---                                        | -1.16         | -1.03           | -1.06     | -1.06       | -1.16     | -1.11       | -1.07      | -1.04        | 1.05       | 1.12         | -1.10      | -1.07        |
| HMG1     | high mobility group box 1               | chr13q12                  | negative regulation of transcription from RNA polymerase II promoter | ---                                        | 1.15          | 1.14            | -1.03     | -1.02       | -1.09     | -1.03       | -1.13      | -1.10        | -1.17      | -1.18        | -1.49      | -1.82        |
| HMG1     | high mobility group box 1               | chr13q12                  | negative regulation of transcription from RNA polymerase II promoter | ---                                        | -1.09         | -1.06           | -1.03     | -1.06       | 1.02      | 1.00        | -1.05      | -1.07        | -1.02      | 1.03         | -1.13      | -1.21        |
| HMG1     | high mobility group box 1               | chr13q12                  | negative regulation of transcription from RNA polymerase II promoter | ---                                        | 1.23          | 1.18            | -1.02     | -1.02       | -1.03     | 1.08        | -1.30      | -1.18        | -1.56      | -1.39        | -1.53      | -1.74        |
| HMG1     | high mobility group box 1               | chr13q12                  | negative regulation of transcription from RNA polymerase II promoter | ---                                        | -1.03         | 1.07            | 1.00      | -1.02       | 1.03      | -1.01       | -1.02      | -1.15        | 1.12       | -1.01        | -1.03      | -1.10        |
| HMG1     | high mobility group box 1               | chr13q12                  | negative regulation of transcription from RNA polymerase II promoter | ---                                        | 1.13          | 1.18            | -1.03     | -1.01       | -1.03     | -1.04       | -1.67      | -1.25        | -1.44      | -1.65        | -1.06      | -1.20        |
| HMGCL    | 3-hydroxy-3-methylglutaryl-CoA lyase    | chr1p36.1-p35             | liver development                                                    | Synthesis_and_Degradation_of_Ketone_Bodies | -1.18         | -1.18           | -1.10     | 1.00        | 1.17      | 1.14        | 1.28       | 1.14         | 1.28       | 1.36         | 1.03       | 1.38         |
| HMGCR    | 3-hydroxy-3-methylglutaryl-CoA lyase    | chr5q13.3-q14             | lipid metabolic process                                              | Cholesterol_Biosynthesis // GenMAPP // St  | 1.12          | 1.14            | 1.06      | -1.05       | -1.04     | 1.06        | -1.05      | -1.13        | 1.46       | 1.43         | 2.05       | 1.85         |
| HMGCR    | 3-hydroxy-3-methylglutaryl-CoA lyase    | chr5q13.3-q14             | lipid metabolic process                                              | Cholesterol_Biosynthesis // GenMAPP // St  | 1.14          | 1.09            | 1.05      | -1.12       | -1.12     | -1.02       | -1.04      | -1.06        | 1.66       | 1.83         | 2.55       | 2.58         |
| HMGCS1   | 3-hydroxy-3-methylglutaryl-CoA synthase | chr5p14-p13               | response to acid                                                     | Cholesterol_Biosynthesis // GenMAPP        | 1.06          | 1.01            | -1.00     | 1.12        | 1.04      | 1.04        | -1.14      | 1.04         | 1.47       | 1.39         | 2.07       | 2.08         |
| HMGCS1   | 3-hydroxy-3-methylglutaryl-CoA synthase | chr5p14-p13               | response to acid                                                     | Cholesterol_Biosynthesis // GenMAPP        | 1.04          | -1.00           | -1.11     | -1.13       | 1.23      | 1.08        | 1.04       | -1.08        | 2.21       | 1.82         | 3.36       | 3.33         |
| HMG1     | high mobility group nucleosome          | chr21q22.2                | pyrimidine dimer repair by nucleotide-excision repair                | ---                                        | 1.03          | 1.08            | -1.10     | -1.04       | -1.07     | -1.09       | 1.07       | -1.03        | 1.31       | 1.14         | 1.08       | 1.04         |
| HMG1     | high mobility group nucleosome          | chr21q22.2                | pyrimidine dimer repair by nucleotide-excision repair                | ---                                        | -1.09         | -1.01           | -1.13     | -1.01       | -1.29     | -1.04       | -1.31      | -1.25        | -1.39      | -1.04        | -1.25      | -1.25        |
| HMG1     | high mobility group nucleosome          | chr1p36.1                 | chromatin organization                                               | ---                                        | -1.06         | 1.07            | -1.08     | -1.04       | -1.03     | -1.07       | 1.08       | -1.03        | 1.11       | -1.00        | -1.09      | -1.13        |
| HMG1     | high mobility group nucleosome          | chr15q21.1                | 0                                                                    | ---                                        | 1.18          | 1.03            | -1.04     | 1.01        | -1.54     | 1.01        | 1.02       | 1.40         | 2.43       | 2.58         | 3.53       | 2.29         |
| HMG1     | high mobility group nucleosome          | chr6p14.1                 | regulation of transcription from RNA polymerase II promoter          | ---                                        | 1.01          | 1.09            | -1.07     | -1.06       | -1.05     | -1.01       | -1.12      | -1.05        | -1.69      | -1.42        | -1.82      | -1.86        |
| HMG1     | high mobility group nucleosome          | chr6p21.3                 | 0                                                                    | ---                                        | 1.11          | 1.04            | -1.08     | -1.12       | -1.11     | 1.05        | -1.21      | -1.13        | -1.19      | 1.01         | -1.29      | -1.38        |
| HMG1     | high mobility group nucleosome          | chr6p21.3                 | 0                                                                    | ---                                        | 1.19          | 1.13            | -1.01     | 1.05        | -1.13     | 1.12        | -1.29      | -1.23        | -1.13      | 1.06         | -1.20      | -1.28        |
| HMG1     | high mobility group nucleosome          | chrXq13.3                 | transcription, DNA-dependent                                         | ---                                        | 1.38          | 1.13            | 1.13      | 1.04        | -1.03     | 1.07        | -1.11      | 1.07         | -1.44      | -1.59        | -2.06      | -1.91        |
| HMG1     | high mobility group nucleosome          | chrXq13.3                 | transcription, DNA-dependent                                         | ---                                        | 1.50          | 1.34            | -1.08     | 1.02        | 1.02      | 1.02        | -1.12      | 1.19         | -1.33      | -1.22        | -2.36      | -2.79        |
| HMGXB3   | HMG box domain containing protein       | chr5q32                   | phosphorylation                                                      | ---                                        | -1.12         | -1.15           | 1.07      | 1.20        | 1.06      | 1.16        | 1.07       | -1.04        | 1.22       | 1.26         | 1.19       | 1.12         |
| HMGXB4   | HMG box domain containing protein       | chr22q13.1                | endosome to lysosome transport                                       | ---                                        | -1.07         | -1.07           | 1.08      | 1.05        | 1.08      | 1.04        | 1.35       | 1.19         | 1.27       | 1.07         | 1.23       | 1.31         |
| HMH1     | histocompatibility (minor)              | chr19p13.3                | signal transduction                                                  | ---                                        | 1.15          | 1.09            | -1.10     | 1.21        | -1.25     | -1.14       | 1.31       | 1.12         | 1.59       | 1.26         | -1.03      | 1.35         |
| HMMR     | hyaluronan-mediated motility receptor   | chr5q33.2-qter            | carbohydrate metabolic process                                       | ---                                        | 1.06          | 1.04            | -1.13     | -1.10       | -1.02     | -1.03       | -1.19      | 1.01         | -1.38      | -1.22        | -1.05      | -1.24        |
| HMMR     | hyaluronan-mediated motility receptor   | chr5q33.2-qter            | carbohydrate metabolic process                                       | ---                                        | 1.05          | 1.03            | -1.01     | 1.09        | -1.11     | -1.02       | -1.34      | -1.11        | -1.34      | -1.20        | -1.06      | -1.01        |
| HMOX1    | heme oxygenase (decycling)              | chr22q13.1                | angiogenesis                                                         | ---                                        | -1.14         | -1.05           | -1.06     | -1.56       | 1.06      | -1.08       | -1.24      | -1.06        | 2.06       | 3.52         | 2.95       | 1.94         |
| HMOX2    | heme oxygenase (decycling)              | chr16p13.3                | response to hypoxia                                                  | ---                                        | -1.11         | -1.08           | 1.05      | 1.01        | 1.17      | 1.07        | 1.04       | -1.01        | 1.04       | -1.12        | 1.26       | 1.34         |
| HMX2     | H6 family homeobox 2                    | chr10q26.13               | transcription, DNA-dependent                                         | ---                                        | -1.06         | -1.07           | -1.02     | -1.17       | -1.02     | -1.25       | -1.33      | 1.11         | -1.32      | -1.55        | -1.03      | -1.11        |
| HN1      | hematological and neurological          | chr17q25.1                | 0                                                                    | ---                                        | -1.06         | -1.02           | -1.08     | -1.00       | 1.01      | -1.01       | 1.02       | -1.00        | 1.40       | 1.34         | 1.25       | 1.30         |
| HN1      | hematological and neurological          | chr17q25.1                | 0                                                                    | ---                                        | -1.09         | -1.03           | -1.03     | -1.03       | 1.03      | -1.02       | -1.06      | -1.03        | 1.28       | 1.15         | 1.14       | 1.13         |
| HN1L     | hematological and neurological          | chr16p13.3                | 0                                                                    | ---                                        | -1.05         | 1.01            | -1.04     | -1.00       | -1.07     | -1.06       | -1.07      | 1.00         | 1.03       | 1.05         | -1.11      | -1.06        |
| HN1L     | hematological and neurological          | chr16p13.3                | 0                                                                    | ---                                        | -1.03         | 1.01            | 1.27      | 1.04        | 1.13      | 1.03        | -1.00      | -1.32        | -1.23      | -1.08        | 1.23       | 1.48         |
| HNMT     | histamine N-methyltransferase           | chr2q22.1                 | response to tumor cell                                               | ---                                        | -1.17         | 1.09            | -1.18     | -1.43       | -1.26     | -1.25       | -1.41      | -1.05        | -1.67      | -1.65        | -2.93      | -3.37        |
| HNMT     | histamine N-methyltransferase           | chr2q22.1                 | response to tumor cell                                               | ---                                        | 1.09          | 1.04            | 1.05      | -1.03       | 1.02      | -1.15       | 1.40       | 1.20         | 2.94       | 1.93         | 2.93       | 2.50         |
| HNMT     | histamine N-methyltransferase           | chr2q22.1                 | response to tumor cell                                               | ---                                        | -1.00         | -1.08           | 1.14      | -1.07       | 1.01      | -1.06       | -1.13      | 1.02         | -2.05      | -1.92        | -2.61      | -2.65        |
| HNMPA0   | NULL                                    | ---                       | mRNA splicing, via spliceosome                                       | ---                                        | -1.01         | 1.00            | 1.09      | -1.02       | -1.02     | 1.09        | -1.72      | -1.32        | -1.74      | -1.56        | -1.72      | -1.65        |
| HNMPA0   | heterogeneous nuclear ribonucleoprotein | chr5q31                   | mRNA splicing, via spliceosome                                       | ---                                        | 1.03          | 1.04            | -1.05     | -1.02       | -1.02     | -1.01       | -1.22      | -1.17        | -1.46      | -1.41        | -1.41      | -1.43        |
| HNMPA1   | heterogeneous nuclear ribonucleoprotein | chr12q13.1                | alternative mRNA splicing, via spliceosome                           | ---                                        | 1.03          | 1.03            | -1.01     | 1.03        | -1.02     | -1.01       | 1.19       | -1.03        | 1.13       | -1.01        | -1.19      | -1.39        |
| HNMPA1   | heterogeneous nuclear ribonucleoprotein | chr12q13.1                | alternative mRNA splicing, via spliceosome                           | ---                                        | 1.80          | 1.41            | 1.05      | 1.13        | 1.07      | 1.28        | 1.07       | 1.18         | -2.05      | -1.64        | -1.67      | -1.41        |
| HNMPA1   | heterogeneous nuclear ribonucleoprotein | chr10q11.22 // chr11p15.5 | alternative mRNA splicing, via spliceosome                           | ---                                        | 1.03          | 1.04            | 1.01      | -1.02       | 1.04      | -1.02       | 1.12       | -1.02        | 1.11       | -1.00        | -1.23      | -1.31        |
| HNMPA1P3 | heterogeneous nuclear ribonucleoprotein | ---                       | 0                                                                    | ---                                        | 1.22          | 1.07            | -1.04     | -1.04       | -1.27     | 1.11        | -1.19      | -1.11        | -1.50      | -1.15        | -1.79      | -1.73        |
| HNMPA2B  | heterogeneous nuclear ribonucleoprotein | chr7p15                   | mRNA splicing, via spliceosome                                       | mRNA_processing_Reactome // GenMAPP        | -1.05         | 1.06            | -1.06     | -1.00       | 1.01      | -1.10       | 1.05       | -1.02        | 1.19       | 1.08         | -1.12      | -1.20        |
| HNMPA2B  | heterogeneous nuclear ribonucleoprotein | chr7p15                   | mRNA splicing, via spliceosome                                       | mRNA_processing_Reactome // GenMAPP        | -1.05         | -1.03           | 1.01      | 1.09        | 1.09      | 1.06        | -1.05      | -1.02        | -1.36      | -1.40        | -1.21      | -1.12        |
| HNMPA3   | heterogeneous nuclear ribonucleoprotein | chr2q31.2                 | mRNA splicing, via spliceosome                                       | mRNA_processing_Reactome // GenMAPP        | -1.05         | -1.02           | -1.05     | -1.09       | 1.11      | 1.07        | -1.23      | -1.16        | 1.01       | -1.04        | -1.24      | -1.27        |
| HNMPA3   | heterogeneous nuclear ribonucleoprotein | chr2q31.2                 | mRNA splicing, via spliceosome                                       | mRNA_processing_Reactome // GenMAPP        | -1.03         | 1.01            | -1.05     | 1.01        | 1.00      | 1.05        | -1.08      | -1.02        | -1.20      | 1.02         | -1.97      | -1.95        |
| HNMPA3   | heterogeneous nuclear ribonucleoprotein | chr2q31.2                 | mRNA splicing, via spliceosome                                       | mRNA_processing_Reactome // GenMAPP        | 1.08          | 1.12            | 1.00      | -1.02       | -1.07     | 1.04        | -1.28      | -1.10        | -1.21      | -1.13        | -1.48      | -1.47        |
| HNMPA3   | heterogeneous nuclear ribonucleoprotein | chr10q11.21 // chr21q22.1 | mRNA splicing, via spliceosome                                       | mRNA_processing_Reactome // GenMAPP        | 1.03          | 1.05            | -1.03     | 1.07        | -1.14     | -1.04       | 1.01       | 1.03         | 1.20       | 1.10         | -1.23      | -1.29        |
| HNMPA3   | heterogeneous nuclear ribonucleoprotein | chr10q11.21 // chr21q22.1 | mRNA splicing, via spliceosome                                       | mRNA_processing_Reactome // GenMAPP        | -1.05         | 1.03            | -1.05     | -1.01       | -1.04     | 1.00        | -1.10      | -1.07        | -1.25      | 1.00         | -1.81      | -1.80        |
| HNMPA3   | heterogeneous nuclear ribonucleoprotein | chr10q11.21 // chr21q22.1 | mRNA splicing, via spliceosome                                       | mRNA_processing_Reactome // GenMAPP        | -1.00         | 1.03            | -1.09     | -1.03       | -1.10     | -1.02       | -1.04      | -1.04        | 1.06       | 1.14         | -1.29      | -1.32        |
| HNMPAB   | heterogeneous nuclear ribonucleoprotein | chr5q35.3                 | epithelial to mesenchymal transition                                 | mRNA_processing_Reactome // GenMAPP        | 1.09          | 1.11            | -1.01     | -1.00       | 1.04      | 1.01        | -1.03      | -1.01        | -1.01      | -1.17        | -1.07      | -1.22        |
| HNMPNC   | heterogeneous nuclear ribonucleoprotein | chr14q11.2                | mRNA splicing, via spliceosome                                       | mRNA_processing_Reactome // GenMAPP        | -1.20         | -1.04           | -1.00     | -1.05       | 1.30      | 1.21        | -1.01      | 1.11         | -1.51      | -1.32        | -2.52      | -1.35        |
| HNMPNC   | heterogeneous nuclear ribonucleoprotein | chr14q11.2                | mRNA splicing, via spliceosome                                       | mRNA_processing_Reactome // GenMAPP        | -1.02         | 1.03            | -1.07     | -1.09       | 1.04      | 1.05        | 1.03       | -1.02        | 1.04       | 1.14         | 1.14       | 1.14         |
| HNMPCL1  | heterogeneous nuclear ribonucleoprotein | chr1p36.21                | 0                                                                    | ---                                        | 1.28          | 1.52            | 1.39      | -1.06       | 1.29      | -1.01       | -1.10      | 1.22         | 1.66       | 1.41         | 1.01       | -1.27        |
| HNMPD    | heterogeneous nuclear ribonucleoprotein | chr4q21                   | mRNA splicing, via spliceosome                                       | mRNA_processing_Reactome // GenMAPP        | 1.03          | 1.15            | -1.09     | -1.09       | 1.03      | 1.00        | -1.12      | -1.07        | -1.21      | -1.18        | -1.56      | -1.76        |

| ID        | Gene Title                                     | Chromosomal Location      | 1st Gene Ontology Biological Process           | Pathway                             | A2497 30 mins | A2497P' 30 mins | A2497 2 h | A2497P' 2 h | A2497 4 h | A2497P' 4 h | A2497 24 h | A2497P' 24 h | A2497 48 h | A2497P' 48 h | A2497 72 h | A2497P' 72 h |
|-----------|------------------------------------------------|---------------------------|------------------------------------------------|-------------------------------------|---------------|-----------------|-----------|-------------|-----------|-------------|------------|--------------|------------|--------------|------------|--------------|
| HNRPND    | heterogeneous nuclear ribonucleoprotein D      | chr4q21                   | mRNA splicing, via spliceosome                 | mRNA_processing_Reactome // GenMAPP | 1.04          | 1.08            | -1.06     | -1.07       | -1.08     | 1.04        | -1.09      | -1.05        | -1.33      | -1.19        | -1.43      | -1.66        |
| HNRPND    | heterogeneous nuclear ribonucleoprotein D      | chr4q21                   | mRNA splicing, via spliceosome                 | mRNA_processing_Reactome // GenMAPP | -1.01         | 1.03            | -1.00     | -1.01       | 1.01      | 1.02        | -1.30      | -1.22        | -1.52      | -1.33        | -1.69      | -1.66        |
| HNRPND    | heterogeneous nuclear ribonucleoprotein D      | chr4q21                   | mRNA splicing, via spliceosome                 | mRNA_processing_Reactome // GenMAPP | 1.57          | 2.12            | 1.22      | 1.33        | 1.02      | 1.37        | 1.45       | -1.01        | -1.53      | -1.54        | -2.44      | -1.93        |
| HNRPND    | heterogeneous nuclear ribonucleoprotein D      | chr4q21                   | mRNA splicing, via spliceosome                 | mRNA_processing_Reactome // GenMAPP | 1.15          | 1.15            | 1.04      | -1.09       | -1.10     | 1.01        | -1.30      | -1.20        | -1.45      | -1.23        | -1.66      | -2.02        |
| HNRPND    | heterogeneous nuclear ribonucleoprotein D      | chr4q21                   | mRNA splicing, via spliceosome                 | mRNA_processing_Reactome // GenMAPP | 1.23          | 1.32            | 1.04      | 1.08        | 1.05      | -1.02       | -1.22      | 1.01         | -1.91      | -1.72        | -2.15      | -2.51        |
| HNRPNDL   | heterogeneous nuclear ribonucleoprotein D-like | chr4q21.22                | transcription, DNA-dependent                   | ---                                 | 1.09          | 1.09            | -1.08     | -1.07       | -1.07     | -1.09       | -1.18      | -1.21        | -1.04      | -1.20        | 1.01       | -1.21        |
| HNRPNDL   | heterogeneous nuclear ribonucleoprotein D-like | chr4q21.22                | transcription, DNA-dependent                   | ---                                 | 1.08          | 1.09            | -1.06     | -1.04       | -1.06     | 1.01        | -1.12      | -1.15        | -1.31      | -1.37        | -1.10      | -1.33        |
| HNRPNDL   | heterogeneous nuclear ribonucleoprotein D-like | chr4q21.22                | transcription, DNA-dependent                   | ---                                 | 1.02          | 1.09            | -1.09     | -1.08       | -1.05     | -1.03       | -1.06      | -1.10        | -1.20      | -1.27        | -1.14      | -1.24        |
| HNRPNDL   | heterogeneous nuclear ribonucleoprotein D-like | chr4q21.22                | transcription, DNA-dependent                   | ---                                 | 1.09          | 1.43            | 1.05      | 1.16        | -1.21     | -1.07       | 1.26       | -1.07        | -1.52      | -1.31        | -1.25      | -1.37        |
| HNRPNDL   | heterogeneous nuclear ribonucleoprotein D-like | chr4q21.22                | transcription, DNA-dependent                   | ---                                 | -1.33         | -1.18           | -3.65     | -2.46       | -2.13     | -2.52       | 1.58       | 1.24         | 1.39       | 1.20         | 1.78       | 1.55         |
| HNRPNDL   | heterogeneous nuclear ribonucleoprotein D-like | chr4q21.22                | transcription, DNA-dependent                   | ---                                 | 1.08          | 1.14            | 1.06      | 1.02        | 1.13      | 1.08        | -1.54      | -1.19        | -1.72      | -1.50        | -1.56      | -1.58        |
| HNRPNH1   | heterogeneous nuclear ribonucleoprotein H1     | chr5q35.3                 | mRNA splicing, via spliceosome                 | mRNA_processing_Reactome // GenMAPP | 1.19          | 1.16            | 1.02      | -1.04       | 1.13      | 1.13        | -1.32      | -1.20        | -2.18      | -1.97        | -1.39      | -1.88        |
| HNRPNH1   | heterogeneous nuclear ribonucleoprotein H1     | chr5q35.3                 | mRNA splicing, via spliceosome                 | mRNA_processing_Reactome // GenMAPP | 1.20          | 1.08            | -1.07     | 1.01        | -1.06     | 1.09        | -1.14      | -1.18        | -1.04      | -1.02        | -1.25      | -1.39        |
| HNRPNH2   | heterogeneous nuclear ribonucleoprotein H2     | chrXq22                   | mRNA splicing, via spliceosome                 | mRNA_processing_Reactome // GenMAPP | 1.16          | 1.17            | -1.08     | -1.09       | -1.13     | 1.02        | -1.18      | -1.15        | -1.11      | 1.03         | -1.27      | -1.42        |
| HNRPNH3   | heterogeneous nuclear ribonucleoprotein H3     | chr10q22                  | mRNA splicing, via spliceosome                 | ---                                 | -1.03         | 1.03            | -1.09     | 1.04        | -1.03     | -1.05       | -1.27      | -1.07        | -1.22      | -1.22        | -1.22      | -1.37        |
| HNRPNK    | heterogeneous nuclear ribonucleoprotein K      | chr9q21.32 /// chr9q21.31 | mRNA splicing, via spliceosome                 | ---                                 | 1.13          | 1.07            | -1.03     | 1.15        | -1.08     | 1.10        | -1.20      | -1.13        | -1.43      | -1.26        | -1.50      | -1.51        |
| HNRPPLL   | heterogeneous nuclear ribonucleoprotein PLL    | chr2p22.1                 | mRNA processing                                | ---                                 | 1.01          | -1.04           | 1.29      | 1.25        | 1.10      | 1.19        | 1.79       | 1.24         | -1.19      | -1.55        | -1.18      | -2.95        |
| HNRPPLL   | heterogeneous nuclear ribonucleoprotein PLL    | chr2p22.1                 | mRNA processing                                | ---                                 | 1.06          | -1.02           | -1.00     | -1.08       | 1.10      | 1.04        | 1.09       | 1.14         | -1.44      | -1.55        | -1.29      | -1.40        |
| HNRPPLL   | heterogeneous nuclear ribonucleoprotein PLL    | chr2p22.1                 | mRNA processing                                | ---                                 | -1.07         | 1.03            | -1.08     | -1.22       | 1.04      | 1.18        | -1.31      | -1.17        | -1.51      | -1.22        | -2.14      | -1.92        |
| HNRPPLL   | heterogeneous nuclear ribonucleoprotein PLL    | chr2p22.1                 | mRNA processing                                | ---                                 | -1.08         | -1.11           | 1.12      | -1.06       | -1.06     | 1.17        | -1.48      | 1.08         | -1.57      | -1.34        | -1.67      | -1.85        |
| HNRPMP    | heterogeneous nuclear ribonucleoprotein MP     | chr19p13.2                | alternative mRNA splicing, via spliceosome     | ---                                 | -1.01         | 1.06            | -1.01     | -1.05       | 1.05      | 1.02        | -1.05      | 1.02         | -1.06      | -1.25        | -1.44      | -1.28        |
| HNRPMP    | heterogeneous nuclear ribonucleoprotein MP     | chr19p13.2                | alternative mRNA splicing, via spliceosome     | ---                                 | -1.01         | 1.05            | 1.06      | -1.04       | 1.10      | -1.07       | -1.01      | -1.06        | -1.32      | -1.44        | -1.14      | -1.31        |
| HNRPMP    | heterogeneous nuclear ribonucleoprotein MP     | chr1p36.12                | mRNA splicing, via spliceosome                 | mRNA_processing_Reactome // GenMAPP | 1.09          | 1.08            | -1.06     | -1.02       | -1.11     | -1.05       | -1.07      | -1.16        | -1.01      | -1.06        | -1.22      | -1.32        |
| HNRPMP    | heterogeneous nuclear ribonucleoprotein MP     | chr1p36.12                | mRNA splicing, via spliceosome                 | mRNA_processing_Reactome // GenMAPP | -1.01         | 1.03            | 1.13      | 1.10        | -1.00     | -1.18       | -1.03      | -1.24        | -1.54      | -1.51        | -1.42      | -1.45        |
| HNRPMP    | heterogeneous nuclear ribonucleoprotein MP     | chr1p36.12                | mRNA splicing, via spliceosome                 | mRNA_processing_Reactome // GenMAPP | 1.12          | 1.10            | 1.07      | 1.06        | -1.02     | 1.02        | -1.26      | -1.03        | 1.13       | 1.19         | 1.12       | 1.01         |
| HNRPMP    | heterogeneous nuclear ribonucleoprotein MP     | chr1q44                   | mRNA splicing, via spliceosome                 | mRNA_processing_Reactome // GenMAPP | -1.02         | -1.03           | 1.10      | 1.09        | 1.05      | 1.06        | -1.23      | -1.02        | -1.44      | -1.45        | -2.28      | -1.61        |
| HNRPMP    | heterogeneous nuclear ribonucleoprotein MP     | chr1q44                   | mRNA splicing, via spliceosome                 | mRNA_processing_Reactome // GenMAPP | 1.13          | 1.13            | -1.11     | -1.05       | -1.04     | 1.05        | -1.14      | -1.20        | -1.20      | -1.13        | -1.28      | -1.39        |
| HNRPMP    | heterogeneous nuclear ribonucleoprotein MP     | chr1q44                   | mRNA splicing, via spliceosome                 | mRNA_processing_Reactome // GenMAPP | -1.04         | 1.01            | -1.02     | -1.00       | -1.06     | -1.11       | 1.04       | 1.04         | -1.16      | -1.16        | -1.21      | -1.21        |
| HNRPMP    | heterogeneous nuclear ribonucleoprotein MP     | chr1q44                   | mRNA splicing, via spliceosome                 | mRNA_processing_Reactome // GenMAPP | 1.01          | 1.00            | 1.05      | -1.19       | -1.02     | -1.05       | -1.08      | -1.11        | -1.87      | -2.15        | -2.02      | -2.20        |
| HNRPMP    | heterogeneous nuclear ribonucleoprotein MP     | chr1q44                   | mRNA splicing, via spliceosome                 | mRNA_processing_Reactome // GenMAPP | -1.26         | -1.25           | 1.07      | -1.01       | 1.14      | 1.02        | -1.03      | -1.01        | -1.92      | -1.73        | -1.54      | -1.43        |
| HNRPMP    | heterogeneous nuclear ribonucleoprotein MP     | chr1q44                   | mRNA splicing, via spliceosome                 | mRNA_processing_Reactome // GenMAPP | -1.52         | -1.54           | 1.14      | 1.11        | 1.43      | 1.24        | -1.15      | -1.03        | -1.83      | -1.98        | -1.71      | -2.54        |
| HNRPUL1   | heterogeneous nuclear ribonucleoprotein UL1    | chr19q13.2                | mRNA splicing, via spliceosome                 | ---                                 | -1.02         | -1.16           | -1.11     | -1.06       | -1.15     | 1.04        | -1.22      | -1.10        | -1.16      | 1.00         | -1.33      | -1.34        |
| HNRPUL2   | heterogeneous nuclear ribonucleoprotein UL2    | chr1q12.3                 | 0                                              | ---                                 | -1.14         | -1.31           | 1.12      | 1.17        | 1.18      | 1.07        | 1.05       | 1.04         | 1.19       | 1.17         | 1.11       | 1.39         |
| HNRPUL2   | heterogeneous nuclear ribonucleoprotein UL2    | chr1q12.3                 | 0                                              | ---                                 | -1.02         | -1.11           | 1.09      | -1.17       | 1.10      | -1.03       | 1.16       | 1.02         | 1.13       | 1.08         | 1.21       | 1.29         |
| HOGA1     | 4-hydroxy-2-oxoglutarate aldolase              | chr10q24.2                | metabolic process                              | ---                                 | -1.27         | 1.08            | 1.41      | 1.22        | 1.05      | 1.31        | 1.11       | 1.14         | -2.78      | -2.59        | -6.68      | -4.33        |
| HOMER2    | homer homolog 2 (Drosophila)                   | chr15q24.3                | G-protein coupled glutamate receptor signaling | ---                                 | 4.67          | 1.80            | 2.09      | 1.29        | -5.08     | -1.49       | -2.86      | 1.16         | 3.82       | 3.86         | -1.26      | -1.55        |
| HOMER3    | homer homolog 3 (Drosophila)                   | chr19p13.11               | protein targeting                              | ---                                 | -1.01         | -1.08           | 1.27      | 1.22        | 1.11      | -1.00       | -1.24      | -1.17        | 1.33       | 1.09         | 1.26       | 1.52         |
| HOMER3    | homer homolog 3 (Drosophila)                   | chr19p13.11               | protein targeting                              | ---                                 | 1.02          | 1.72            | 1.04      | -2.33       | -1.23     | -1.46       | 1.99       | 1.53         | -1.20      | -1.07        | 1.97       | 1.91         |
| HOMER3    | homer homolog 3 (Drosophila)                   | chr19p13.11               | protein targeting                              | ---                                 | 1.46          | 1.18            | -1.44     | 1.31        | 1.47      | 1.34        | 1.55       | 1.85         | -1.91      | -1.87        | -2.66      | -2.07        |
| HOOK1     | hook homolog 1 (Drosophila)                    | chr1p32.1                 | microtubule cytoskeleton organization          | ---                                 | 1.24          | 1.05            | 1.04      | -1.09       | -1.07     | 1.36        | -1.42      | -1.14        | -1.54      | -1.44        | -1.51      | -1.61        |
| HOOK3     | hook homolog 3 (Drosophila)                    | chr8p11.21                | microtubule cytoskeleton organization          | ---                                 | 1.20          | 1.29            | -1.03     | -1.04       | -1.03     | -1.07       | -1.08      | -1.04        | -1.79      | -1.49        | -1.43      | -1.82        |
| HOOK3     | hook homolog 3 (Drosophila)                    | chr8p11.21                | microtubule cytoskeleton organization          | ---                                 | 1.04          | 1.04            | -1.10     | -1.22       | -1.06     | 1.17        | -1.30      | -1.11        | -1.74      | -1.43        | -1.53      | -1.74        |
| HORMAD2   | HORMA domain containing 2                      | chr22q12.2                | meiosis                                        | ---                                 | 1.53          | 1.18            | 2.49      | 5.00        | -2.29     | 4.18        | 1.14       | -1.84        | 3.40       | 3.62         | -1.32      | 1.19         |
| HOTAIR    | HOXA transcript antisense RNA                  | chr12q13.13               | 0                                              | ---                                 | 1.01          | 1.26            | -1.15     | 1.48        | 1.37      | 1.64        | -1.61      | 1.05         | -2.81      | -2.42        | -1.69      | -1.90        |
| HOTAIRM1  | HOXA transcript antisense RNA                  | chr7p15.2                 | 0                                              | ---                                 | -1.01         | 1.03            | 1.11      | 1.10        | -1.13     | -1.04       | 1.41       | 1.13         | 2.43       | 1.86         | 1.68       | 1.34         |
| HOTAIRM1  | HOXA transcript antisense RNA                  | chr7p15.2                 | 0                                              | ---                                 | 1.05          | -1.21           | 1.04      | 1.27        | 1.03      | -1.00       | 1.24       | 1.38         | 2.30       | 1.89         | 1.79       | 1.44         |
| HOXA10    | homeobox A10                                   | chr7p15.2                 | skeletal system development                    | ---                                 | 1.01          | 1.03            | -1.01     | -1.01       | -1.09     | 1.11        | -1.32      | -1.20        | -1.58      | -1.33        | -1.57      | -1.82        |
| HOXA10    | homeobox A10                                   | chr7p15.2                 | skeletal system development                    | ---                                 | -1.03         | 1.01            | -1.06     | -1.06       | -1.05     | -1.03       | -1.16      | -1.24        | -1.59      | -1.44        | -1.36      | -1.62        |
| HOXA11-AS | HOXA11 antisense RNA                           | chr7p15.2                 | 0                                              | ---                                 | 1.31          | 1.24            | 1.08      | 1.43        | 1.20      | -1.01       | 1.45       | 1.44         | -1.61      | -1.85        | -1.29      | -1.30        |
| HOXA13    | homeobox A13                                   | chr7p15.2                 | skeletal system development                    | ---                                 | -1.04         | -1.02           | 1.05      | 1.08        | 1.03      | 1.11        | 1.13       | 1.06         | -1.41      | -1.09        | -1.47      | -1.15        |
| HOXA13    | homeobox A13                                   | chr7p15.2                 | skeletal system development                    | ---                                 | -1.01         | 1.03            | -1.08     | 1.02        | -1.00     | -1.00       | -1.10      | 1.15         | -2.20      | -1.41        | -1.55      | -2.00        |
| HOXA3     | homeobox A3                                    | chr7p15.2                 | angiogenesis                                   | ---                                 | 1.14          | 1.11            | -1.11     | 1.27        | -1.03     | -1.05       | -1.14      | -1.27        | -1.35      | -1.44        | -1.52      | -1.96        |
| HOXA5     | homeobox A5                                    | chr7p15.2                 | skeletal system development                    | ---                                 | 1.08          | -1.12           | 1.34      | 1.52        | -1.10     | -1.21       | -1.06      | -1.03        | -1.93      | -1.61        | -2.93      | -1.64        |
| HOXA7     | homeobox A7                                    | chr7p15.2                 | negative regulation of transcription from      | ---                                 | -1.05         | 1.05            | -1.11     | -1.00       | -1.18     | -1.19       | -1.23      | -1.09        | -1.31      | -1.26        | -1.27      | -1.34        |
| HOXA7     | homeobox A7                                    | chr7p15.2                 | negative regulation of transcription from      | ---                                 | 1.07          | -1.03           | 1.08      | 1.05        | 1.02      | 1.12        | -1.27      | -1.13        | -1.76      | -1.66        | -2.03      | -2.02        |
| HOXA-AS4  | HOXA cluster antisense RNA                     | chr7p15.2                 | 0                                              | ---                                 | 1.13          | 1.20            | 1.21      | 1.39        | 1.07      | 1.09        | 1.20       | -1.22        | -2.00      | -1.70        | -1.31      | -1.34        |
| HOXB13    | homeobox B13                                   | chr17q21.2                | angiogenesis                                   | ---                                 | 1.09          | 1.05            | -1.08     | -1.16       | 1.39      | 1.91        | -1.08      | -1.13        | 1.15       | 1.54         | 1.15       | 1.36         |
| HOXB13    | homeobox B13                                   | chr17q21.2                | angiogenesis                                   | ---                                 | 1.20          | 1.63            | 1.03      | -1.62       | 1.12      | -1.97       | 1.09       | -1.02        | 2.24       | 2.48         | 1.43       | 2.06         |
| HOXB2     | homeobox B2                                    | chr17q21.32               | morphogenesis of an epithelial sheet           | ---                                 | 1.01          | -1.10           | 1.08      | -1.14       | -1.33     | -1.17       | -1.14      | -1.03        | 1.57       | 1.20         | 1.15       | -1.07        |
| HOXB7     | homeobox B7                                    | chr17q21.3                | transcription, DNA-dependent                   | ---                                 | -1.03         | -1.14           | 1.02      | 1.10        | 1.10      | -1.06       | 1.04       | 1.06         | -1.54      | -1.30        | -1.52      | -1.75        |
| HOXB7     | homeobox B7                                    | chr17q21.3                | transcription, DNA-dependent                   | ---                                 | -1.16         | -1.22           | 1.16      | 1.13        | 1.16      | -1.03       | -1.13      | -1.04        | -1.59      | -1.61        | -1.42      | -1.35        |
| HOXB7     | homeobox B7                                    | chr17q21.3                | transcription, DNA-dependent                   | ---                                 | 1.04          | -1.00           | 1.02      | 1.05        | -1.01     | 1.06        | -1.06      | 1.03         | -1.20      | -1.26        | -1.50      | -1.48        |
| HOXB7     | homeobox B7                                    | chr17q21.3                | transcription, DNA-dependent                   | ---                                 | 1.10          | 1.06            | 1.04      | 1.08        | -1.06     | 1.08        | -1.09      | 1.02         | -1.27      | -1.29        | -1.53      | -1.46        |
| HOXB9     | homeobox B9                                    | chr17q21.3                | transcription, DNA-dependent                   | ---                                 | -1.14         | -1.16           | -1.14     | -1.06       | 1.04      | 1.41        | -1.26      | 1.08         | 1.46       | 1.49         | 1.41       | 1.77         |
| HOXB-AS3  | HOXB cluster antisense RNA                     | chr17q21.32               | 0                                              | ---                                 | 1.02          | -1.35           | 3.85      | 4.79        | -3.36     | -2.25       | 3.60       | -3.15        | 2.38       | -2.73        | 2.82       | 3.50         |
| HOXC4     | homeobox C4                                    | chr12q13.3                | skeletal system development                    | ---                                 | -1.05         | 1.07            | 1.14      | 1.15        | -1.17     | 1.06        | 1.08       | -1.07        | -1.97      | -1.65        | -2.48      | -2.03        |

| ID                                               | Gene Title                  | Chromosomal Location | 1st Gene Ontology Biological Process      | Pathway                                    | A2497 30 mins | A2497P' 30 mins | A2497 2 h | A2497P' 2 h | A2497 4 h | A2497P' 4 h | A2497 24 h | A2497P' 24 h | A2497 48 h | A2497P' 48 h | A2497 72 h | A2497P' 72 h |
|--------------------------------------------------|-----------------------------|----------------------|-------------------------------------------|--------------------------------------------|---------------|-----------------|-----------|-------------|-----------|-------------|------------|--------------|------------|--------------|------------|--------------|
| HOXC6                                            | homeobox C6                 | chr12q13.3           | transcription, DNA-dependent              | ---                                        | 1.03          | 1.04            | 1.10      | 1.14        | -1.06     | 1.05        | -1.17      | 1.11         | -2.00      | -1.44        | -1.76      | -1.55        |
| HOXD10                                           | homeobox D10                | chr2q31.1            | skeletal system development               | ---                                        | -1.26         | -1.85           | 2.52      | -1.17       | -2.19     | 1.22        | 1.65       | 5.36         | -1.32      | 5.05         | 1.69       | 2.62         |
| HOXD10                                           | homeobox D10                | chr2q31.1            | skeletal system development               | ---                                        | -1.27         | 1.33            | -1.77     | -1.01       | -1.23     | -1.96       | -2.64      | -2.32        | 1.02       | 2.32         | 1.30       | 1.49         |
| HOXD11                                           | homeobox D11                | chr2q31.1            | skeletal system development               | ---                                        | 1.38          | -2.03           | -1.89     | -1.56       | -1.15     | -2.07       | 2.72       | 1.79         | 1.88       | 1.68         | 3.52       | 3.46         |
| HOXD9                                            | homeobox D9                 | chr2q31.1            | transcription, DNA-dependent              | ---                                        | -1.23         | -1.36           | 1.15      | -1.11       | 1.47      | 1.18        | 1.00       | -1.09        | -2.37      | -1.99        | -1.82      | -1.45        |
| HOXD-AS1                                         | HOXD cluster antisense RN   | chr2q31.2            | 0                                         | ---                                        | 3.23          | 1.82            | -1.98     | -2.50       | -4.21     | -1.47       | 1.40       | 1.65         | -1.61      | -1.35        | 3.89       | -3.46        |
| HOXD-AS1                                         | HOXD cluster antisense RN   | chr2q31.2            | 0                                         | ---                                        | -1.28         | -3.15           | 1.01      | 1.86        | -1.79     | 1.00        | -1.53      | -1.47        | -1.00      | 1.26         | 2.18       | -1.16        |
| HP09025                                          | uncharacterized LOC10065    | chr17q25.3           | 0                                         | ---                                        | -1.21         | -1.60           | -1.50     | -1.90       | 3.57      | 5.93        | 1.58       | 2.74         | -1.08      | 3.98         | -6.78      | -11.51       |
| HP1BP3                                           | heterochromatin protein 1,  | chr1p36.12           | nucleosome assembly                       | ---                                        | 1.04          | 1.00            | -1.01     | 1.10        | 1.03      | 1.14        | -1.34      | -1.29        | -1.74      | -1.55        | -1.43      | -1.34        |
| HP1BP3                                           | heterochromatin protein 1,  | chr1p36.12           | nucleosome assembly                       | ---                                        | 1.05          | 1.05            | -1.02     | 1.07        | -1.02     | 1.07        | 1.02       | -1.05        | -1.08      | -1.05        | -1.00      | -1.05        |
| HP1BP3                                           | heterochromatin protein 1,  | chr1p36.12           | nucleosome assembly                       | ---                                        | -1.02         | -1.04           | -1.02     | -1.11       | 1.45      | -1.00       | 1.16       | 1.13         | -1.16      | -1.01        | 1.39       | 1.31         |
| HPCAL1                                           | hippocalcin-like 1          | chr2p25.1            | signal transduction                       | ---                                        | -1.02         | -1.20           | -1.00     | 1.29        | -1.02     | 1.05        | 1.08       | 1.04         | 1.34       | 1.46         | 1.31       | 1.75         |
| HPCAL1                                           | hippocalcin-like 1          | chr2p25.1            | signal transduction                       | ---                                        | -1.14         | -1.16           | 1.02      | 1.01        | 1.13      | -1.08       | 1.44       | 1.20         | 1.77       | 1.73         | 1.53       | 2.09         |
| HPDL                                             | 4-hydroxyphenylpyruvate     | chr1p34.1            | aromatic amino acid family metabolic pr   | ---                                        | 1.08          | 1.09            | 1.13      | 1.12        | 1.31      | 1.07        | -1.27      | 1.11         | -1.03      | -1.10        | -1.52      | -1.47        |
| HPGD                                             | hydroxyprostaglandin dehy   | chr4q34-q35          | lipid metabolic process                   | Prostaglandin_synthesis_regulation // GenM | 1.07          | 1.23            | -1.03     | -1.04       | 1.03      | 1.05        | -1.27      | 1.05         | -9.85      | -4.82        | -16.52     | -13.45       |
| HPGD                                             | hydroxyprostaglandin dehy   | chr4q34-q35          | lipid metabolic process                   | Prostaglandin_synthesis_regulation // GenM | 1.06          | 1.17            | -1.02     | -1.06       | -1.14     | -1.07       | -1.04      | 1.01         | -7.91      | -4.52        | -22.41     | -13.75       |
| HPGD                                             | hydroxyprostaglandin dehy   | chr4q34-q35          | lipid metabolic process                   | Prostaglandin_synthesis_regulation // GenM | 1.44          | 1.45            | -1.04     | -1.58       | -1.13     | 1.21        | -1.82      | -1.34        | -6.44      | -3.77        | -6.96      | -5.36        |
| HPRT1                                            | hypoxanthine phosphoribos   | chrXq26.1            | response to amphetamine                   | Nucleotide_Metabolism // GenMAPP           | 1.15          | 1.28            | -2.04     | 2.87        | 1.49      | 2.49        | 2.57       | 3.02         | 1.78       | 1.37         | -1.08      | 1.70         |
| HPRT1                                            | hypoxanthine phosphoribos   | chrXq26.1            | response to amphetamine                   | Nucleotide_Metabolism // GenMAPP           | 1.09          | 1.07            | -1.00     | 1.04        | -1.02     | 1.09        | -1.08      | -1.08        | -1.01      | 1.11         | -1.14      | -1.24        |
| HPS1                                             | Hermansky-Pudlak syndrom    | chr10q23.1-q23.3     | organelle organization                    | ---                                        | -1.14         | 1.04            | -1.00     | -1.06       | -1.30     | -1.30       | 1.48       | 1.23         | 1.24       | -1.07        | -1.79      | -1.87        |
| HPS1                                             | Hermansky-Pudlak syndrom    | chr10q23.1-q23.3     | organelle organization                    | ---                                        | 1.08          | 1.14            | 1.02      | 1.09        | 1.02      | -1.17       | 1.12       | 1.61         | -1.29      | -0.91        | -4.13      | -2.42        |
| HPS1                                             | Hermansky-Pudlak syndrom    | chr10q23.1-q23.3     | organelle organization                    | ---                                        | -1.05         | -1.15           | -1.02     | 1.08        | -1.01     | -1.12       | -1.08      | -1.02        | -1.02      | 1.12         | -1.48      | -1.45        |
| HPS1                                             | Hermansky-Pudlak syndrom    | chr10q23.1-q23.3     | organelle organization                    | ---                                        | -1.02         | -1.23           | 1.07      | 1.10        | 1.08      | 1.30        | -1.05      | 1.06         | 2.12       | -1.27        | -1.59      | -1.89        |
| HPS3                                             | Hermansky-Pudlak syndrom    | chr3q24              | organelle organization                    | ---                                        | 1.12          | -1.03           | 1.15      | -1.13       | -1.20     | 1.07        | -1.11      | -1.09        | 1.20       | 1.38         | 1.17       | -1.18        |
| HPS3                                             | Hermansky-Pudlak syndrom    | chr3q24              | organelle organization                    | ---                                        | -1.08         | -1.08           | 1.03      | -1.10       | -1.31     | -1.18       | -1.09      | -1.17        | -1.06      | 1.19         | 1.89       | 1.60         |
| HPS3                                             | Hermansky-Pudlak syndrom    | chr3q24              | organelle organization                    | ---                                        | 1.08          | 1.16            | 1.11      | -1.05       | -1.01     | 1.02        | -1.02      | 1.07         | 1.05       | 1.17         | 1.11       | 1.25         |
| HPS4                                             | Hermansky-Pudlak syndrom    | chr22cen-q12.3       | protein targeting                         | ---                                        | -1.02         | -1.04           | 1.08      | 1.06        | -1.11     | -1.04       | -1.19      | -1.01        | -1.28      | -1.05        | -1.00      | 1.07         |
| HPS4                                             | Hermansky-Pudlak syndrom    | chr22cen-q12.3       | protein targeting                         | ---                                        | -1.05         | -1.05           | 1.15      | 1.05        | 1.08      | -1.02       | -1.09      | -1.03        | -1.28      | -1.16        | 1.03       | 1.15         |
| HPS5                                             | Hermansky-Pudlak syndrom    | chr11p14             | organelle organization                    | ---                                        | 1.13          | 1.22            | 1.04      | 1.04        | 1.06      | -1.01       | -1.01      | 1.02         | 1.06       | 1.08         | 1.42       | 1.38         |
| HPSE                                             | heparanase                  | chr4q21.3            | carbohydrate metabolic process            | ---                                        | 1.47          | 1.28            | 1.05      | -1.27       | -1.10     | 1.19        | -1.22      | -1.07        | -1.54      | -1.46        | -1.73      | -2.32        |
| HR                                               | hair growth associated      | chr8p21.2            | transcription, DNA-dependent              | ---                                        | -1.06         | -1.09           | -1.25     | -1.04       | 1.04      | 1.03        | -1.12      | 1.19         | -1.23      | -1.35        | -2.36      | -1.48        |
| HR                                               | hair growth associated      | chr8p21.2            | transcription, DNA-dependent              | ---                                        | -1.05         | -1.11           | 1.02      | 1.12        | 1.00      | -1.12       | -1.31      | -1.10        | -2.10      | -1.78        | -2.89      | -1.88        |
| HR                                               | hair growth associated      | chr8p21.2            | transcription, DNA-dependent              | ---                                        | 1.01          | -1.05           | 1.01      | -1.00       | -1.10     | 1.10        | -1.29      | 1.10         | -2.04      | -1.71        | -2.08      | -2.08        |
| HR44                                             | Hr44 antigen                | ---                  | 0                                         | ---                                        | -1.36         | -1.35           | 1.38      | -1.37       | 1.38      | 2.15        | 1.43       | 1.51         | 6.48       | 3.06         | 2.22       | 3.24         |
| HRASL52                                          | HRAS-like suppressor 2      | chr11q12.3           | lipid metabolic process                   | ---                                        | 1.17          | 1.06            | 1.00      | -1.03       | 1.40      | 1.02        | 1.78       | 1.38         | 1.79       | 1.68         | 1.24       | -1.01        |
| HRASL55                                          | HRAS-like suppressor fam    | chr11q13.2           | 0                                         | ---                                        | 1.22          | 1.32            | -1.41     | -1.46       | 1.00      | 1.27        | 1.04       | -1.00        | 1.15       | 1.31         | -1.29      | 1.78         |
| HRG                                              | histidine-rich glycoprotein | chr3q27              | angiogenesis                              | ---                                        | -1.97         | -2.32           | 3.29      | 1.85        | 1.13      | -5.76       | 7.11       | 6.77         | 13.12      | 3.36         | -1.38      | -3.75        |
| HRH1                                             | histamine receptor H1       | chr3p25              | inflammatory response                     | GPCRDB_Class_A_Rhodopsin-like // GenM      | -1.04         | -1.09           | 1.06      | -1.11       | 1.09      | 1.05        | 1.16       | 1.01         | 1.13       | 1.16         | 1.34       | 1.53         |
| HRH1                                             | histamine receptor H1       | chr3p25              | inflammatory response                     | GPCRDB_Class_A_Rhodopsin-like // GenM      | 1.08          | -1.26           | -1.00     | -1.30       | -1.08     | 1.09        | 1.47       | 1.14         | 1.66       | 1.66         | 2.10       | 2.13         |
| HRK                                              | harakiri, BCL2 interacting  | chr12q24.22          | apoptotic process                         | Apoptosis // GenMAPP /// Apoptosis_KEGG    | 1.19          | -1.76           | -1.31     | -2.07       | 1.21      | -1.02       | -1.44      | 1.59         | 1.53       | -2.38        | 1.33       | -1.21        |
| HRSP12                                           | heat-responsive protein 12  | chr8q22              | regulation of translational termination   | ---                                        | 1.24          | 1.09            | 1.23      | 1.20        | 1.00      | -1.14       | -1.12      | -1.04        | -1.64      | -1.39        | -1.28      | -1.35        |
| HRSP12                                           | heat-responsive protein 12  | chr8q22              | regulation of translational termination   | ---                                        | 1.10          | 1.16            | 1.12      | -1.00       | -1.05     | -1.26       | -1.28      | -1.49        | -1.97      | -1.47        | -1.22      | -1.26        |
| HS2ST1                                           | heparan sulfate 2-O-sulfate | chr1p22.3            | carbohydrate metabolic process            | ---                                        | 1.01          | -1.03           | 1.06      | 1.06        | 1.02      | 1.09        | -1.08      | 1.00         | -1.23      | -1.01        | -1.36      | -1.25        |
| HS3ST4                                           | heparan sulfate (glucosamin | chr16p11.2           | heparan sulfate proteoglycan metabolic p  | ---                                        | 1.04          | 1.74            | -1.10     | -2.18       | 1.09      | -1.01       | 1.09       | 1.26         | 1.37       | -1.64        | -2.15      | 1.28         |
| HS6ST2                                           | heparan sulfate 6-O-sulfate | chrXq26.2            | carbohydrate metabolic process            | ---                                        | -1.08         | -1.07           | -1.06     | -1.01       | -1.06     | -1.00       | -1.04      | -1.01        | -1.20      | -1.04        | -1.19      | -1.27        |
| HS6ST2                                           | heparan sulfate 6-O-sulfate | chrXq26.2            | carbohydrate metabolic process            | ---                                        | -1.04         | 1.01            | -1.03     | -1.03       | -1.01     | -1.06       | -1.00      | 1.01         | -1.08      | 1.05         | -1.21      | -1.22        |
| HS6ST3                                           | heparan sulfate 6-O-sulfate | chr13q32.1           | 0                                         | ---                                        | 1.03          | -1.14           | 1.01      | 1.06        | 1.39      | 1.05        | -1.10      | 1.08         | -1.55      | -1.32        | -2.11      | -1.47        |
| HS6ST3                                           | heparan sulfate 6-O-sulfate | chr13q32.1           | 0                                         | ---                                        | 1.20          | 1.21            | -1.26     | -1.00       | 1.33      | 1.25        | -1.10      | -1.04        | -2.07      | -1.87        | -2.02      | -1.92        |
| HS6ST3                                           | heparan sulfate 6-O-sulfate | chr13q32.1           | 0                                         | ---                                        | 1.07          | 1.32            | 1.04      | 1.09        | -1.06     | -1.12       | -1.23      | -1.07        | -1.85      | -1.53        | -1.49      | -1.74        |
| hsa-let-7a-3 // hsa-let-7a-3 // hsa-let-7b //--- |                             |                      | 0                                         | ---                                        | 1.35          | 1.11            | -1.49     | 1.05        | -1.12     | -1.51       | -1.25      | -1.01        | 2.39       | 2.61         | 1.96       | 2.00         |
| HSBP1                                            | heat shock factor binding p | chr16q23.3           | negative regulation of transcription from | ---                                        | -1.07         | -1.01           | -1.03     | 1.04        | 1.04      | -1.08       | 1.05       | 1.04         | 1.15       | 1.04         | -1.29      | -1.17        |
| HSBP1L1                                          | heat shock factor binding p | chr18q23             | 0                                         | ---                                        | -1.07         | 1.00            | 1.06      | 1.20        | 1.02      | 1.01        | -1.07      | 1.05         | 1.22       | 1.22         | 1.18       | 1.05         |
| HSCB                                             | HscB iron-sulfur cluster co | chr22q12.1           | protein folding                           | ---                                        | 1.04          | -1.07           | -1.04     | 1.15        | -1.01     | 1.01        | 1.18       | 1.05         | 1.55       | 1.23         | 1.52       | 1.63         |
| HSD11B2                                          | hydroxysteroid (11-beta) de | chr16q22             | response to hypoxia                       | Glucocorticoid_Mineralocorticoid_Metabo    | -1.10         | -1.10           | 1.08      | 1.12        | 1.25      | 1.09        | 1.38       | 1.14         | 1.47       | 1.22         | 1.50       | 1.66         |
| HSD17B1                                          | hydroxysteroid (17-beta) de | chr17q11-q21         | lipid metabolic process                   | Steroid_Biosynthesis // GenMAPP            | 1.26          | 1.08            | -1.02     | 1.13        | -1.00     | 1.04        | 1.14       | 1.20         | -1.34      | -1.61        | -2.15      | -1.76        |
| HSD17B10                                         | hydroxysteroid (17-beta) de | chrXp11.2            | lipid metabolic process                   | ---                                        | -1.06         | -1.02           | -1.05     | 1.00        | 1.03      | 1.02        | 1.07       | 1.04         | -1.09      | -1.09        | -1.55      | -1.51        |
| HSD17B11                                         | hydroxysteroid (17-beta) de | chr4q22.1            | lipid metabolic process                   | ---                                        | 1.12          | 1.12            | 1.02      | -1.03       | -1.04     | -1.07       | 1.03       | 1.03         | -1.63      | -1.66        | -1.34      | -1.76        |
| HSD17B12                                         | hydroxysteroid (17-beta) de | chr11p11.2           | lipid metabolic process                   | ---                                        | -1.52         | 1.09            | -1.47     | 1.28        | 1.15      | -1.01       | -1.09      | 1.40         | -1.17      | -1.14        | 1.32       | 2.03         |
| HSD17B14                                         | hydroxysteroid (17-beta) de | chr19q13.33          | lipid metabolic process                   | ---                                        | 7.34          | 7.60            | 1.38      | 1.81        | -2.71     | -1.38       | 1.44       | 1.47         | 2.43       | 3.50         | -1.25      | -1.42        |
| HSD17B4                                          | hydroxysteroid (17-beta) de | chr5q21              | very long-chain fatty acid metabolic proc | Steroid_Biosynthesis // GenMAPP            | 1.10          | 1.14            | -1.06     | -1.02       | 1.03      | -1.03       | 1.19       | -1.04        | 1.02       | 1.01         | -1.09      | -1.10        |
| HSD17B7                                          | hydroxysteroid (17-beta) de | chr1q23              | lipid metabolic process                   | Steroid_Biosynthesis // GenMAPP            | -1.02         | -1.09           | 1.03      | 1.23        | -1.04     | -1.07       | -1.10      | 1.01         | 1.23       | 1.30         | 1.76       | 2.12         |
| HSD17B8                                          | hydroxysteroid (17-beta) de | chr6p21.3            | lipid metabolic process                   | ---                                        | -1.09         | -1.09           | 1.11      | -1.01       | 1.18      | -1.02       | 1.44       | 1.30         | 1.59       | 1.41         | 1.11       | 1.20         |
| HSD3B7                                           | hydroxy-delta-5-steroid de  | chr16p11.2           | regulation of cell growth                 | ---                                        | -1.07         | -1.11           | -1.02     | -1.04       | 1.11      | 1.01        | 1.19       | 1.07         | 1.35       | 1.37         | 1.21       | 1.34         |
| HSD3BP1 ///                                      | hydroxy-delta-5-steroid de  | ---                  | 0                                         | ---                                        | -1.59         | -1.02           | -1.76     | -2.72       | -1.19     | 4.74        | -9.43      | -1.76        | 2.30       | -2.06        | 13.75      | 6.20         |
| HSDL2                                            | hydroxysteroid dehydrogen   | chr9q32              | metabolic process                         | ---                                        | -1.10         | 1.01            | 1.00      | -1.00       | 1.06      | -1.08       | 1.05       | 1.03         | -1.02      | -1.01        | -1.25      | -1.06        |
| HSDL2                                            | hydroxysteroid dehydrogen   | chr9q32              | metabolic process                         | ---                                        | 1.04          | 1.03            | -1.01     | -1.02       | -1.06     | 1.10        | -1.11      | -1.08        | -1.54      | 1.01         | -1.46      | -1.27        |

| ID            | Gene Title                   | Chromosomal Location | 1st Gene Ontology Biological Process     | Pathway                               | A2497 30 mins | A2497P' 30 mins | A2497 2 h | A2497P' 2 h | A2497 4 h | A2497P' 4 h | A2497 24 h | A2497P' 24 h | A2497 48 h | A2497P' 48 h | A2497 72 h | A2497P' 72 h |
|---------------|------------------------------|----------------------|------------------------------------------|---------------------------------------|---------------|-----------------|-----------|-------------|-----------|-------------|------------|--------------|------------|--------------|------------|--------------|
| HSF1          | heat shock transcription fac | chr8q24.3            | in utero embryonic development           | ---                                   | -1.27         | -1.29           | 1.03      | -1.17       | 1.30      | 1.06        | 1.66       | 1.37         | 1.51       | 1.25         | 1.27       | 1.34         |
| HSF2          | heat shock transcription fac | chr6q22.31           | transcription, DNA-dependent             | ---                                   | -1.01         | -1.03           | 1.07      | 1.09        | -1.15     | -1.13       | 1.14       | 1.03         | -1.06      | -1.03        | 1.29       | 1.01         |
| HSF2          | heat shock transcription fac | chr6q22.31           | transcription, DNA-dependent             | ---                                   | 1.01          | 1.29            | 1.10      | -1.03       | 1.56      | -1.02       | 1.10       | 1.30         | 1.02       | -1.08        | 3.06       | 2.13         |
| HSFY1 /// HSF | heat shock transcription fac | chrYq11.222          | transcription, DNA-dependent             | ---                                   | -1.23         | 1.36            | -3.44     | 1.01        | -2.13     | -3.70       | -1.35      | -3.31        | -1.38      | -1.16        | 1.07       | -1.33        |
| HSP90AA1      | heat shock protein 90kDa a   | chr14q32.33          | G2                                       | ---                                   | -1.01         | 1.03            | -1.04     | 1.04        | -1.08     | -1.04       | 1.03       | -1.03        | 1.30       | 1.14         | -1.04      | -1.12        |
| HSP90AA1      | heat shock protein 90kDa a   | chr14q32.33          | G2                                       | ---                                   | 1.02          | 1.06            | 1.02      | 1.06        | -1.07     | 1.02        | -1.02      | -1.07        | 1.14       | 1.08         | -1.11      | -1.20        |
| HSP90AA1      | heat shock protein 90kDa a   | chr14q32.33          | G2                                       | ---                                   | -1.12         | 1.06            | -1.09     | -1.04       | -1.10     | -1.05       | -1.05      | -1.03        | 1.10       | 1.14         | -1.14      | -1.17        |
| HSP90AA1      | heat shock protein 90kDa a   | chr14q32.33          | G2                                       | ---                                   | -1.08         | -1.03           | -1.06     | -1.05       | 1.01      | -1.05       | 1.09       | -1.01        | 1.33       | 1.14         | -1.07      | -1.21        |
| HSP90B1       | heat shock protein 90kDa b   | chr12q24.2-q24.3     | response to hypoxia                      | ---                                   | 1.11          | 1.10            | 1.00      | -1.03       | -1.05     | -1.05       | 1.05       | 1.09         | 1.18       | 1.17         | 1.24       | 1.24         |
| HSP90B1 /// H | heat shock protein 90kDa b   | chr12q24.2-q24.3     | response to hypoxia                      | ---                                   | -1.02         | -1.00           | 1.02      | 1.03        | 1.04      | 1.02        | -1.01      | -1.05        | 1.13       | 1.02         | 1.22       | 1.26         |
| HSPA12B       | heat shock 70kD protein 12   | chr20p13             | response to stress                       | ---                                   | -1.07         | -1.10           | -1.30     | -1.20       | -1.36     | 1.08        | 2.13       | 1.22         | -1.07      | -2.03        | -2.05      | -2.29        |
| HSPA13        | heat shock protein 70kDa f   | chr21q11             | cell morphogenesis                       | ---                                   | 1.10          | -1.05           | 1.08      | -1.02       | 1.00      | 1.15        | -1.08      | -1.07        | 1.78       | 1.92         | 1.80       | 1.75         |
| HSPA14        | heat shock 70kDa protein 1   | chr10p13             | cell morphogenesis                       | ---                                   | 1.01          | 1.07            | 1.06      | -1.02       | 1.00      | -1.07       | -1.05      | -1.02        | 1.13       | 1.07         | 1.36       | 1.16         |
| HSPA1A /// H  | heat shock 70kDa protein 1   | chr6p21.3            | cell morphogenesis                       | ---                                   | 1.13          | 1.14            | 1.05      | -1.00       | 1.10      | 1.06        | -1.79      | -1.43        | 1.16       | -1.10        | 1.12       | -1.05        |
| HSPA1A /// H  | heat shock 70kDa protein 1   | chr6p21.3            | cell morphogenesis                       | ---                                   | -1.09         | 1.00            | -1.20     | -1.12       | -1.08     | 1.10        | -1.39      | -1.15        | -1.02      | -1.01        | 1.01       | -1.00        |
| HSPA1L        | heat shock 70kDa protein 1   | chr6p21.3            | response to unfolded protein             | ---                                   | -2.45         | -1.46           | 1.00      | -1.62       | 1.55      | -1.10       | 1.47       | 2.58         | -1.91      | -3.58        | 7.15       | 9.89         |
| HSPA1L        | heat shock 70kDa protein 1   | chr6p21.3            | cell morphogenesis                       | ---                                   | -1.11         | -1.10           | 1.30      | 1.23        | 1.88      | -1.09       | -1.29      | -1.15        | 2.07       | 1.25         | 3.02       | 3.29         |
| HSPA2         | heat shock 70kDa protein 2   | chr14q24.1           | cell morphogenesis                       | ---                                   | -1.19         | -1.00           | 1.33      | -1.12       | -1.36     | -1.17       | -1.86      | -1.07        | -1.31      | -1.16        | -1.26      | -1.06        |
| HSPA4         | heat shock 70kDa protein 4   | chr5q31.1            | cell morphogenesis                       | ---                                   | 1.03          | -1.01           | 1.21      | -1.05       | 1.05      | 1.02        | 1.03       | 1.05         | 1.17       | 1.14         | 1.61       | 1.26         |
| HSPA4         | heat shock 70kDa protein 4   | chr5q31.1            | cell morphogenesis                       | ---                                   | -1.03         | -1.05           | 1.04      | 1.03        | -1.04     | -1.08       | 1.11       | 1.03         | 1.47       | 1.34         | 1.60       | 1.64         |
| HSPA4         | heat shock 70kDa protein 4   | chr5q31.1            | cell morphogenesis                       | ---                                   | -1.08         | -1.03           | -1.01     | 1.05        | 1.04      | -1.10       | 1.19       | 1.07         | 1.70       | 1.25         | 1.04       | 1.57         |
| HSPA5         | heat shock 70kDa protein 5   | chr9q33.3            | cell morphogenesis                       | ---                                   | -1.01         | -1.12           | 1.02      | 1.01        | 1.21      | 1.06        | -1.09      | 1.08         | 1.48       | 1.36         | 1.19       | 1.30         |
| HSPA5         | heat shock 70kDa protein 5   | chr9q33.3            | cell morphogenesis                       | ---                                   | -1.05         | -1.04           | -1.03     | 1.07        | 1.00      | 1.02        | -1.11      | -1.12        | 1.30       | 1.22         | 1.23       | 1.25         |
| HSPA6         | heat shock 70kDa protein 6   | chr1q23              | cell morphogenesis                       | ---                                   | -1.22         | -1.12           | -2.10     | -1.81       | -1.25     | 1.18        | -1.15      | 1.43         | 22.56      | 7.34         | 5.07       | 2.93         |
| HSPA6         | heat shock 70kDa protein 6   | chr1q23              | cell morphogenesis                       | ---                                   | 1.00          | -1.05           | -1.30     | -1.12       | -1.58     | -1.17       | -2.38      | -1.53        | 12.16      | 4.10         | 5.21       | 3.24         |
| HSPA9         | heat shock 70kDa protein 9   | chr5q31.1            | cell morphogenesis                       | ---                                   | -1.09         | -1.01           | -1.01     | 1.07        | -1.04     | 1.05        | -1.05      | -1.03        | -1.30      | -1.10        | -1.20      | -1.11        |
| HSPB11        | heat shock protein family B  | chr1p32              | response to stress                       | ---                                   | -1.08         | -1.18           | -1.06     | 1.09        | -1.01     | 1.06        | -1.17      | -1.02        | -1.18      | -1.18        | -1.08      | -1.05        |
| HSPB11        | heat shock protein family B  | chr1p32              | response to stress                       | ---                                   | -1.08         | -1.13           | -1.03     | -1.07       | -1.01     | -1.02       | -1.16      | 1.01         | -1.20      | -1.10        | 1.04       | 1.02         |
| HSPB6         | heat shock protein, alpha-C  | chr19q13.12          | regulation of muscle contraction         | ---                                   | -1.35         | -1.23           | 1.14      | -1.31       | 1.12      | 1.04        | 1.19       | 1.18         | 1.48       | 1.37         | 1.06       | 1.45         |
| HSPB8         | heat shock 22kDa protein 8   | chr12q24.23          | response to stress                       | ---                                   | 1.10          | -1.27           | 1.09      | -1.18       | -1.03     | -1.03       | -1.22      | -1.33        | -1.96      | -1.54        | -1.53      | -1.60        |
| HSPD1         | heat shock 60kDa protein 1   | chr2q33.1            | B cell cytokine production               | ---                                   | 1.09          | 1.05            | 1.01      | 1.17        | 1.12      | 1.06        | 1.09       | 1.21         | -1.10      | -1.16        | -1.44      | -1.44        |
| HSPD1         | heat shock 60kDa protein 1   | chr2q33.1            | B cell cytokine production               | ---                                   | -1.04         | 1.01            | -1.05     | 1.03        | -1.04     | -1.04       | 1.08       | -1.00        | 1.18       | 1.09         | -1.04      | -1.06        |
| HSPE1-MOB     | HSPE1-MOB4 readthrough       | chr2q33 /// chr2q33  | transport                                | ---                                   | 1.19          | 1.22            | 1.12      | -1.04       | 1.07      | -1.12       | -1.00      | -1.08        | 1.02       | -1.05        | 1.54       | 1.14         |
| HSPG2         | heparan sulfate proteoglycan | chr1p36.1-p34        | retinoid metabolic process               | ---                                   | 1.21          | 1.00            | -1.04     | -1.31       | -1.05     | -1.02       | 1.09       | -1.46        | -1.23      | -1.46        | -1.11      | 1.02         |
| HSPG2         | heparan sulfate proteoglycan | chr1p36.1-p34        | retinoid metabolic process               | ---                                   | 1.19          | 1.06            | 1.14      | 1.21        | 1.03      | -1.08       | 1.41       | 1.17         | 1.04       | -1.21        | -1.40      | -1.27        |
| HSPH1         | heat shock 105kDa/110kDa     | chr13q12.3           | cell morphogenesis                       | ---                                   | 1.07          | 1.11            | -1.06     | 1.00        | -1.02     | 1.10        | -1.36      | 1.02         | -1.33      | -1.33        | -1.16      | -1.33        |
| HSPH1         | heat shock 105kDa/110kDa     | chr13q12.3           | cell morphogenesis                       | ---                                   | -1.12         | -1.07           | 1.03      | 1.00        | 1.10      | 1.01        | -1.03      | -1.05        | -1.07      | -1.43        | -1.06      | -1.17        |
| HTATIP2       | HIV-1 Tat interactive prote  | chr11p15.1           | angiogenesis                             | ---                                   | -1.10         | -1.10           | 1.02      | 1.07        | -1.06     | -1.24       | 1.03       | -1.03        | -1.02      | 1.13         | 1.07       | 1.13         |
| HTATIP2       | HIV-1 Tat interactive prote  | chr11p15.1           | angiogenesis                             | ---                                   | -1.06         | -1.00           | -1.06     | -1.02       | -1.05     | -1.07       | 1.02       | 1.08         | 1.13       | 1.14         | -1.05      | -1.02        |
| HTATIP2       | HIV-1 Tat interactive prote  | chr11p15.1           | angiogenesis                             | ---                                   | 1.02          | -1.06           | -1.04     | 1.12        | -1.10     | 1.11        | -1.11      | -1.04        | 1.36       | 1.59         | -1.01      | 1.22         |
| HTATIP2       | HIV-1 Tat interactive prote  | chr11p15.1           | angiogenesis                             | ---                                   | -1.04         | -1.02           | 1.11      | 1.05        | 1.24      | 1.04        | 1.09       | -1.12        | 1.13       | 1.19         | 1.10       | 1.14         |
| HTATSF1       | HIV-1 Tat specific factor 1  | chrXq26.3            | transcription, DNA-dependent             | ---                                   | 1.07          | 1.25            | 1.21      | -1.22       | 1.24      | 1.11        | 1.00       | 1.12         | -1.16      | -1.14        | -1.28      | -1.57        |
| HTATSF1       | HIV-1 Tat specific factor 1  | chrXq26.3            | transcription, DNA-dependent             | ---                                   | 1.09          | 1.13            | 1.03      | -1.00       | -1.04     | 1.04        | -1.13      | 1.06         | -1.47      | -1.34        | -1.40      | -1.62        |
| HTN1          | histatin 1                   | chr4q13              | biomineral tissue development            | ---                                   | 1.01          | 1.37            | -2.17     | -8.90       | -1.81     | 1.57        | 2.36       | 1.63         | 1.74       | 1.32         | 1.17       | -1.18        |
| HTR2B         | 5-hydroxytryptamine (sero    | chr2q36.3-q37.1      | neural crest cell migration              | GPCRDB_Class_A_Rhodopsin-like // GenM | -1.03         | -1.07           | -1.11     | -1.04       | -1.06     | -1.09       | 1.24       | 1.00         | -1.34      | -2.06        | -1.85      | -1.31        |
| HTR2C         | 5-hydroxytryptamine (sero    | chrXq24              | behavioral fear response                 | GPCRDB_Class_A_Rhodopsin-like // GenM | 1.56          | 2.46            | 4.13      | 7.74        | 2.16      | 7.00        | -3.61      | 2.17         | 1.06       | -1.27        | -1.06      | 1.45         |
| HTR4          | 5-hydroxytryptamine (sero    | chr5q31-q33          | signal transduction                      | GPCRDB_Class_A_Rhodopsin-like // GenM | 2.56          | 1.77            | -1.44     | 2.02        | 2.01      | 1.32        | -2.83      | -3.19        | 4.40       | 2.07         | -2.04      | -3.25        |
| HTR6          | 5-hydroxytryptamine (sero    | chr1p36-p35          | G-protein coupled receptor signaling pat | GPCRDB_Class_A_Rhodopsin-like // GenM | 1.10          | -1.14           | -1.77     | -2.82       | -1.27     | -1.03       | -8.30      | -1.68        | 2.29       | 1.88         | 2.51       | 2.36         |
| HTR7P1        | 5-hydroxytryptamine (sero    | chr12p13.1           | 0                                        | ---                                   | -1.29         | -1.02           | -1.19     | -1.48       | 1.59      | 1.29        | -1.52      | -1.15        | -3.60      | -1.97        | -2.74      | -4.39        |
| HTRA2         | HtrA serine peptidase 2      | chr2p12              | proteolysis                              | ---                                   | 1.05          | -1.07           | -1.11     | 1.14        | 1.03      | 1.03        | 1.14       | 1.11         | 1.15       | 1.14         | 1.14       | 1.34         |
| HTRA3         | HtrA serine peptidase 3      | chr4p16.1            | regulation of cell growth                | ---                                   | 1.46          | 1.37            | 1.28      | 1.20        | -1.48     | -1.23       | -1.02      | -1.24        | 1.28       | -1.05        | 1.52       | 1.50         |
| HTT           | huntingtin                   | chr4p16.3            | urea cycle                               | ---                                   | -1.10         | 1.00            | 1.01      | 1.00        | 1.03      | -1.30       | 1.39       | 1.21         | -1.57      | -1.52        | -2.94      | -2.41        |
| HTT           | huntingtin                   | chr4p16.3            | urea cycle                               | ---                                   | 1.08          | -1.10           | -1.12     | -1.13       | -1.06     | -1.01       | -1.08      | -1.03        | 1.32       | 1.24         | -1.07      | -1.05        |
| HUS1          | HUS1 checkpoint homolog      | chr7p13-p12          | cell cycle checkpoint                    | ---                                   | 1.06          | 1.03            | 1.06      | 1.02        | -1.20     | -1.08       | -1.28      | -1.05        | -1.89      | -1.97        | -1.26      | -1.58        |
| HUS1          | HUS1 checkpoint homolog      | chr7p13-p12          | cell cycle checkpoint                    | ---                                   | 1.06          | 1.04            | 1.02      | 1.01        | -1.04     | -1.14       | 1.15       | 1.20         | 1.41       | 1.21         | 1.07       | 1.10         |
| HUS1B         | HUS1 checkpoint homolog      | chr6p25.3            | DNA damage checkpoint                    | ---                                   | 1.28          | 1.41            | 2.30      | 2.88        | 1.44      | 1.26        | -1.28      | -1.36        | 1.25       | 1.10         | -1.21      | 1.39         |
| HUWE1         | HECT, UBA and WWE do         | chrXp11.22           | protein polyubiquitination               | ---                                   | -1.12         | -1.08           | 1.04      | 1.05        | 1.09      | -1.02       | 1.09       | 1.01         | -1.03      | -1.20        | -1.08      | -1.08        |
| HUWE1         | HECT, UBA and WWE do         | chrXp11.22           | protein polyubiquitination               | ---                                   | 1.10          | -1.17           | 1.14      | -1.12       | -1.06     | -1.12       | -1.59      | -1.35        | 1.00       | 1.09         | 1.09       | -1.05        |
| HYAL1         | hyaluronoglucosaminidase     | chr3p21.3-p21.2      | response to reactive oxygen species      | ---                                   | -1.00         | -1.05           | -1.04     | 1.30        | 1.02      | -1.13       | 1.22       | 1.20         | 1.56       | 1.28         | 2.14       | 2.55         |
| HYAL2         | hyaluronoglucosaminidase     | chr3p21.3            | response to reactive oxygen species      | ---                                   | -1.00         | 1.02            | -1.06     | 1.02        | 1.27      | 1.03        | -1.00      | -1.03        | 1.54       | 1.35         | 1.58       | 1.83         |
| HYAL3         | hyaluronoglucosaminidase     | chr3p21.3            | carbohydrate metabolic process           | ---                                   | 1.10          | -1.06           | 1.07      | 1.31        | 1.31      | 1.21        | 1.15       | 1.21         | -1.04      | -1.01        | -1.78      | -1.44        |
| HYI           | hydroxypyruvate isomerase    | chr1p34.2            | 0                                        | ---                                   | -1.09         | -1.09           | 1.04      | 1.15        | -1.02     | -1.08       | 1.23       | 1.27         | 2.11       | 1.21         | -1.10      | -1.10        |
| HYI           | hydroxypyruvate isomerase    | chr1p34.2            | 0                                        | ---                                   | -1.14         | -1.18           | 1.08      | 1.07        | 1.01      | -1.08       | 1.49       | 1.52         | 2.06       | 1.32         | -1.31      | -1.37        |
| HYI           | hydroxypyruvate isomerase    | chr1p34.2            | 0                                        | ---                                   | -1.04         | -1.07           | -1.01     | 1.27        | 1.13      | 1.04        | 1.21       | 1.31         | 2.36       | 1.34         | -1.10      | -1.09        |
| HYLS1         | hydrolethalus syndrome 1     | chr11q24.2           | 0                                        | ---                                   | 1.52          | 1.26            | -1.01     | -1.03       | -1.12     | -1.15       | -1.70      | -1.25        | -2.59      | -3.00        | -1.95      | -2.06        |
| HYOU1         | hypoxia up-regulated 1       | chr11q23.1-q23.3     | cell morphogenesis                       | ---                                   | 1.04          | 1.01            | 1.16      | 1.06        | 1.10      | 1.11        | 1.01       | -1.11        | 1.33       | 1.35         | 1.41       | 1.37         |

| ID           | Gene Title                    | Chromosomal Location | 1st Gene Ontology Biological Process       | Pathway                                   | A2497 30 mins | A2497P' 30 mins | A2497 2 h | A2497P' 2 h | A2497 4 h | A2497P' 4 h | A2497 24 h | A2497P' 24 h | A2497 48 h | A2497P' 48 h | A2497 72 h | A2497P' 72 h |
|--------------|-------------------------------|----------------------|--------------------------------------------|-------------------------------------------|---------------|-----------------|-----------|-------------|-----------|-------------|------------|--------------|------------|--------------|------------|--------------|
| HYPK         | huntingtin interacting prote  | chr15q15.3           | 0                                          | ---                                       | -1.02         | -1.04           | 1.04      | -1.06       | -1.04     | 1.07        | -1.20      | 1.05         | 1.07       | 1.07         | 1.16       | 1.17         |
| HYPK /// MIF | huntingtin interacting prote  | chr15q15.3           | lipid metabolic process                    | ---                                       | -1.31         | -1.26           | 1.19      | 1.10        | 1.23      | -1.07       | -1.08      | 1.10         | -1.32      | -1.16        | -2.20      | -1.26        |
| IAH1         | isoamyl acetate-hydrolyzing   | chr2p25.1            | lipid metabolic process                    | ---                                       | -1.01         | -1.05           | 1.04      | 1.09        | 1.09      | -1.04       | 1.15       | 1.11         | 1.35       | 1.27         | 1.27       | 1.40         |
| IARS         | isoleucyl-tRNA synthetase     | chr9q21              | translation                                | ---                                       | 1.01          | 1.07            | -1.05     | -1.01       | -1.04     | -1.00       | -1.04      | -1.05        | -1.11      | -1.04        | -1.06      | -1.09        |
| IARS2        | isoleucyl-tRNA synthetase     | chr1q41              | translation                                | ---                                       | 1.01          | 1.02            | 1.03      | 1.06        | -1.00     | -1.01       | 1.05       | -1.03        | 1.16       | 1.22         | -1.09      | 1.02         |
| IBA57        | IBA57, iron-sulfur cluster    | chr1q42.13           | glycine catabolic process                  | ---                                       | -1.14         | 1.02            | 1.20      | 1.35        | -1.17     | -1.22       | 1.09       | 1.10         | -1.35      | -1.31        | -1.07      | 1.15         |
| IBA57        | IBA57, iron-sulfur cluster    | chr1q42.13           | glycine catabolic process                  | ---                                       | 1.02          | 1.02            | 1.05      | -1.09       | 1.05      | 1.00        | 1.38       | 1.05         | -1.27      | -1.54        | -2.45      | -1.87        |
| IBTK         | inhibitor of Bruton agamm     | chr6q14.1            | negative regulation of protein phosphory   | ---                                       | -1.88         | -1.03           | 1.56      | -1.69       | -1.12     | -1.17       | 1.30       | -1.33        | 2.69       | 1.50         | 3.26       | 4.13         |
| ICA1         | islet cell autoantigen 1, 69k | chr7p22              | transport                                  | ---                                       | 1.02          | 1.19            | -1.21     | -1.08       | -1.93     | -1.29       | 1.62       | 1.05         | -1.37      | -1.24        | 1.05       | -1.41        |
| ICA1         | islet cell autoantigen 1, 69k | chr7p22              | transport                                  | ---                                       | -1.09         | -1.02           | -1.26     | -1.24       | -1.01     | 1.03        | -1.18      | 1.05         | 1.17       | 1.07         | -1.37      | -1.67        |
| ICA1         | islet cell autoantigen 1, 69k | chr7p22              | transport                                  | ---                                       | -1.24         | 1.04            | -1.05     | -1.40       | 1.20      | -1.07       | 1.31       | 1.32         | -1.33      | -1.33        | -1.37      | -1.14        |
| ICA1         | islet cell autoantigen 1, 69k | chr7p22              | transport                                  | ---                                       | 1.19          | -1.82           | 1.31      | 2.14        | -3.24     | -1.31       | 2.50       | 1.61         | 3.60       | 4.62         | -1.85      | -1.50        |
| ICA1L        | islet cell autoantigen 1,69k  | chr2q33.2            | 0                                          | ---                                       | -1.17         | -1.03           | -1.22     | -1.05       | -1.05     | 1.02        | -1.40      | 1.17         | -1.19      | -1.68        | -2.84      | -3.68        |
| ICA1L        | islet cell autoantigen 1,69k  | chr2q33.2            | 0                                          | ---                                       | 1.54          | 1.41            | -1.06     | 1.12        | 1.04      | 1.09        | -1.07      | 1.06         | -1.28      | 1.15         | -2.66      | -2.25        |
| ICA1L        | islet cell autoantigen 1,69k  | chr2q33.2            | 0                                          | ---                                       | -1.05         | 1.09            | -1.20     | 1.06        | 1.07      | -1.01       | 1.09       | 1.15         | -1.62      | -1.15        | -1.70      | -2.03        |
| ICAM1        | intercellular adhesion mole   | chr19p13.3-p13.2     | ovarian follicle development               | ---                                       | -1.05         | -1.03           | 1.06      | 1.03        | 1.07      | 1.12        | 1.34       | 1.20         | 3.23       | 1.99         | 2.65       | 2.63         |
| ICAM1        | intercellular adhesion mole   | chr19p13.3-p13.2     | ovarian follicle development               | ---                                       | 1.09          | 1.03            | 1.07      | 1.18        | 1.09      | 1.24        | 1.70       | 1.38         | 3.52       | 2.59         | 3.72       | 3.30         |
| ICAM1        | intercellular adhesion mole   | chr19p13.3-p13.2     | ovarian follicle development               | ---                                       | -1.09         | 1.08            | 1.13      | -1.03       | 1.15      | 1.43        | 1.57       | 1.12         | 4.68       | 3.09         | 4.49       | 3.87         |
| ICAM2        | intercellular adhesion mole   | chr17q23.3           | cell adhesion                              | ---                                       | 1.10          | 1.18            | -1.05     | 1.01        | 1.18      | -1.26       | 1.42       | 1.04         | 1.16       | 1.02         | 1.22       | 1.14         |
| ICAM2        | intercellular adhesion mole   | chr17q23.3           | cell adhesion                              | ---                                       | 1.07          | 1.03            | 1.02      | -1.12       | 1.51      | 1.18        | 1.03       | -1.05        | 2.15       | 1.72         | 1.18       | 1.53         |
| ICAM3        | intercellular adhesion mole   | chr19p13.3-p13.2     | cell adhesion                              | ---                                       | -1.17         | -1.12           | 1.01      | -1.08       | 1.07      | -1.05       | 1.09       | 1.05         | 1.90       | 1.65         | 1.07       | 2.01         |
| ICK          | intestinal cell (MAK-like)    | chr6p12.1            | protein phosphorylation                    | ---                                       | 1.05          | -1.16           | -1.08     | 1.00        | 1.05      | 1.13        | -1.42      | -1.03        | -3.95      | -2.57        | -3.74      | -3.72        |
| ICMT         | isoprenylcysteine carboxyl    | chr1p36.21           | in utero embryonic development             | ---                                       | 1.04          | -1.02           | 1.06      | 1.09        | 1.04      | 1.04        | 1.08       | -1.01        | -1.01      | -1.11        | -1.25      | -1.23        |
| ICMT         | isoprenylcysteine carboxyl    | chr1p36.21           | in utero embryonic development             | ---                                       | 1.00          | 1.01            | 1.11      | 1.18        | 1.17      | 1.08        | 1.28       | 1.13         | -2.31      | -1.90        | -1.63      | -1.78        |
| ICOSLG       | inducible T-cell co-stimulat  | chr21q22.3           | defense response                           | ---                                       | 1.04          | -1.20           | -1.01     | 1.21        | 1.18      | -1.16       | 1.02       | 1.19         | -2.03      | -2.47        | -2.33      | -1.35        |
| ICOSLG       | inducible T-cell co-stimulat  | chr21q22.3           | defense response                           | ---                                       | 1.30          | -1.80           | 1.25      | 1.24        | -1.18     | -1.36       | -1.06      | -1.11        | -1.88      | -1.61        | -1.38      | -2.33        |
| ICOSLG       | inducible T-cell co-stimulat  | chr21q22.3           | defense response                           | ---                                       | 1.12          | 1.06            | 1.16      | 1.33        | -1.13     | -1.06       | -1.03      | -1.25        | -2.01      | -4.12        | -2.02      | -4.72        |
| ICOSLG       | inducible T-cell co-stimulat  | chr21q22.3           | defense response                           | ---                                       | 1.15          | 1.19            | -1.16     | 1.13        | 1.12      | -1.03       | -1.03      | 1.25         | -2.48      | -2.35        | -1.85      | -1.78        |
| ICT1         | immature colon carcinoma      | chr17q25.1           | translation                                | ---                                       | -1.04         | -1.04           | -1.06     | 1.03        | 1.17      | 1.03        | 1.10       | -1.11        | 1.38       | 1.18         | 1.41       | 1.39         |
| ID1          | inhibitor of DNA binding 1    | chr20q11             | negative regulation of transcription from  | ---                                       | 1.03          | -1.01           | 1.01      | -1.25       | 1.06      | -1.05       | 1.19       | -1.06        | 1.93       | 1.47         | 1.80       | 1.35         |
| ID2          | inhibitor of DNA binding 2    | chr2p25              | negative regulation of transcription from  | ---                                       | 1.01          | -1.02           | 1.06      | 1.03        | 1.13      | 1.10        | 1.00       | -1.10        | -3.79      | -2.96        | -2.95      | -2.22        |
| ID2          | inhibitor of DNA binding 2    | chr2p25              | negative regulation of transcription from  | ---                                       | -1.09         | -1.00           | 1.04      | 1.25        | 1.21      | 1.09        | -1.48      | -1.38        | -6.01      | -3.06        | -2.59      | -4.87        |
| ID2 /// ID2B | inhibitor of DNA binding 2    | chr2p25 /// chr3p14  | negative regulation of transcription from  | ---                                       | 1.15          | 1.08            | -1.16     | -1.38       | 1.39      | 1.21        | -1.23      | -1.35        | -3.60      | -3.01        | -3.60      | -2.56        |
| ID3          | inhibitor of DNA binding 3    | chr1p36.13-p36.12    | negative regulation of transcription from  | ---                                       | -1.03         | 1.04            | -1.01     | -1.12       | 1.09      | -1.02       | -1.19      | -1.23        | -1.58      | -1.50        | -1.19      | -1.58        |
| ID4          | inhibitor of DNA binding 4    | chr6p22.3            | G1                                         | ---                                       | 3.51          | 3.09            | -1.42     | 1.14        | -1.95     | -1.06       | -14.39     | -1.36        | -3.22      | -1.79        | -5.33      | -2.60        |
| ID4          | inhibitor of DNA binding 4    | chr6p22.3            | G1                                         | ---                                       | 1.16          | 1.07            | -1.40     | -1.13       | -1.30     | -1.27       | 1.63       | 1.61         | -2.89      | -2.58        | -4.16      | -3.38        |
| IDE          | insulin-degrading enzyme      | chr10q23-q25         | ATP catabolic process                      | ---                                       | -1.04         | -1.04           | 1.02      | 1.11        | 1.00      | -1.02       | -1.11      | -1.02        | -1.28      | -1.15        | -1.35      | -1.31        |
| IDH2         | isocitrate dehydrogenase 2    | chr15q26.1           | carbohydrate metabolic process             | Krebs-TCA_Cycle // GenMAPP                | 1.06          | -1.03           | -1.01     | 1.19        | -1.00     | 1.09        | -1.27      | -1.17        | 1.47       | 1.85         | 1.23       | 1.58         |
| IDH2         | isocitrate dehydrogenase 2    | chr15q26.1           | carbohydrate metabolic process             | Krebs-TCA_Cycle // GenMAPP                | 1.02          | 1.01            | 1.41      | 1.05        | 1.16      | 1.14        | -1.04      | 1.08         | 1.24       | 1.51         | 1.12       | 1.40         |
| IDH3A        | isocitrate dehydrogenase 3    | chr15q25.1-q25.2     | carbohydrate metabolic process             | Krebs-TCA_Cycle // GenMAPP                | 1.05          | 1.07            | -1.02     | -1.07       | 1.03      | 1.00        | -1.11      | -1.13        | -1.25      | -1.17        | -1.08      | -1.18        |
| IDH3A        | isocitrate dehydrogenase 3    | chr15q25.1-q25.2     | carbohydrate metabolic process             | Krebs-TCA_Cycle // GenMAPP                | 1.10          | 1.05            | 1.04      | 1.04        | 1.01      | 1.04        | -1.11      | -1.01        | -1.06      | -1.11        | 1.24       | 1.26         |
| IDH3B        | isocitrate dehydrogenase 3    | chr20p13             | tricarboxylic acid cycle                   | Krebs-TCA_Cycle // GenMAPP                | -1.11         | -1.19           | -1.01     | 1.13        | 1.03      | -1.01       | 1.08       | 1.22         | 1.22       | 1.13         | 1.17       | 1.34         |
| IDH3B        | isocitrate dehydrogenase 3    | chr20p13             | tricarboxylic acid cycle                   | Krebs-TCA_Cycle // GenMAPP                | -1.11         | -1.11           | -1.07     | 1.03        | 1.04      | -1.05       | 1.03       | 1.04         | 1.21       | 1.11         | 1.23       | 1.35         |
| IDH3B        | isocitrate dehydrogenase 3    | chr20p13             | tricarboxylic acid cycle                   | Krebs-TCA_Cycle // GenMAPP                | 1.06          | -1.03           | -1.17     | -1.08       | -1.37     | -1.05       | 1.14       | 1.08         | -1.11      | 1.11         | -1.08      | 1.09         |
| ID11         | isopentenyl-diphosphate de    | chr10p15.3           | lipid metabolic process                    | Cholesterol_Biosynthesis // GenMAPP /// C | 1.41          | -1.61           | -1.32     | 1.12        | 1.37      | 1.07        | 1.35       | 1.44         | -1.21      | -1.62        | -2.71      | -1.93        |
| ID11         | isopentenyl-diphosphate de    | chr10p15.3           | lipid metabolic process                    | Cholesterol_Biosynthesis // GenMAPP /// C | -1.12         | -1.03           | -1.00     | -1.08       | -1.01     | -1.10       | 1.05       | -1.10        | 2.02       | 1.54         | 2.35       | 2.43         |
| ID11         | isopentenyl-diphosphate de    | chr10p15.3           | lipid metabolic process                    | Cholesterol_Biosynthesis // GenMAPP /// C | -1.11         | 1.03            | -1.04     | -1.07       | -1.13     | -1.06       | 1.13       | -1.01        | 1.78       | 1.40         | 2.15       | 2.37         |
| ID12         | isopentenyl-diphosphate de    | chr10p15.3           | lipid metabolic process                    | ---                                       | -1.17         | -1.14           | 1.04      | -1.04       | 1.28      | 1.02        | -1.31      | -1.07        | 1.06       | -1.03        | 1.24       | 1.42         |
| ID12-AS1     | ID12 antisense RNA 1          | chr10p15.3           | 0                                          | Cholesterol_Biosynthesis // GenMAPP /// C | 1.33          | 2.56            | 1.11      | 1.37        | 2.24      | 2.06        | -1.73      | -1.09        | 2.17       | 1.86         | 5.10       | 1.85         |
| IDNK         | idnK, gluconokinase homol     | chr9q21.32           | carbohydrate metabolic process             | ---                                       | 1.10          | 1.08            | -1.02     | 1.21        | 1.03      | -1.01       | -1.22      | 1.03         | -1.93      | -1.77        | -2.59      | -1.91        |
| IDS          | iduronate 2-sulfatase         | chrXq28              | carbohydrate metabolic process             | ---                                       | -1.09         | -1.14           | 1.02      | 1.12        | 1.01      | -1.03       | 1.26       | -1.05        | 1.09       | 1.25         | 1.20       | 1.24         |
| IDS          | iduronate 2-sulfatase         | chrXq28              | carbohydrate metabolic process             | ---                                       | -1.03         | -1.11           | 1.07      | 1.11        | -1.02     | -1.03       | 1.17       | -1.08        | 1.23       | 1.21         | 1.06       | 1.19         |
| IER2         | immediate early response 2    | chr19p13.2           | 0                                          | ---                                       | -1.25         | -1.03           | -1.13     | -1.15       | 1.10      | -1.11       | 1.16       | -1.01        | 1.16       | -1.08        | 1.32       | 1.31         |
| IER3         | immediate early response 3    | chr6p21.3            | cell cycle checkpoint                      | ---                                       | 1.01          | -1.00           | -1.08     | -1.00       | 1.07      | 1.04        | 1.53       | 1.32         | 2.90       | 2.46         | 2.71       | 2.60         |
| IER3IP1      | immediate early response 3    | chr18q12             | regulation of fibroblast apoptotic process | ---                                       | 1.16          | 1.05            | 1.03      | -1.04       | -1.00     | -1.12       | -1.11      | -1.06        | -1.02      | -1.00        | 1.09       | -1.03        |
| IERS         | immediate early response 5    | chr1q25.3            | 0                                          | ---                                       | 1.04          | 1.01            | -1.02     | 1.02        | -1.15     | 1.01        | 1.19       | 1.20         | 1.18       | -1.12        | 1.21       | 1.05         |
| IFFO2        | intermediate filament fami    | chr1p36.13           | 0                                          | ---                                       | 1.04          | 1.05            | 1.72      | 1.58        | -1.12     | -1.14       | -1.29      | -1.12        | 1.86       | 1.75         | 1.94       | 2.46         |
| IFI27        | interferon, alpha-inducible   | chr14q32             | apoptotic process                          | ---                                       | -1.17         | -1.16           | -1.15     | -1.37       | 1.01      | 1.03        | 3.39       | 2.12         | 3.43       | 2.65         | 1.80       | 1.11         |
| IF44         | interferon-induced protein    | chr1p31.1            | response to virus                          | ---                                       | 1.17          | 1.10            | 1.13      | 1.02        | 1.24      | 1.19        | 3.81       | 2.83         | 2.08       | 1.70         | 1.86       | 1.22         |
| IF44         | interferon-induced protein    | chr1p31.1            | response to virus                          | ---                                       | 1.07          | 1.66            | -1.04     | 1.84        | 1.25      | -1.74       | 2.25       | 1.59         | 1.11       | 1.13         | 1.32       | -1.96        |
| IF44L        | interferon-induced protein    | chr1p31.1            | immune response                            | ---                                       | 1.07          | 1.04            | 1.19      | -1.02       | 1.24      | 1.15        | 1.55       | 1.33         | 1.12       | 1.12         | -1.31      | -1.69        |
| IF6          | interferon, alpha-inducible   | chr1p35              | release of cytochrome c from mitochond     | ---                                       | 1.09          | 1.04            | 1.49      | 1.05        | 1.87      | 1.82        | 1.15       | 1.13         | 2.64       | 1.13         | 2.21       | -1.11        |
| IFIH1        | interferon induced with hel   | chr2q24              | detection of virus                         | ---                                       | -1.06         | -1.15           | 1.03      | -1.08       | -1.13     | 1.02        | 1.79       | 1.93         | 1.25       | 1.13         | 1.27       | 1.02         |
| IFIH1        | interferon induced with hel   | chr2q24              | detection of virus                         | ---                                       | 1.07          | -1.03           | -1.06     | 1.28        | 1.08      | 1.02        | 1.47       | 1.26         | 3.28       | 1.70         | -1.04      | -1.21        |
| IFT1         | interferon-induced protein    | chr10q23.31          | response to virus                          | ---                                       | 1.01          | -1.02           | -1.02     | -1.00       | 1.17      | 1.10        | 5.08       | 3.92         | 2.45       | 2.08         | 2.15       | 1.35         |
| IFT2         | interferon-induced protein    | chr10q23.31          | apoptotic process                          | ---                                       | 1.30          | 1.26            | -1.12     | -1.07       | 1.14      | 1.04        | 3.33       | 2.93         | 2.24       | 2.01         | 2.08       | 1.30         |





| ID     | Gene Title                                       | Chromosomal Location | 1st Gene Ontology Biological Process           | Pathway                                   | A2497 30 mins | A2497P' 30 mins | A2497 2 h | A2497P' 2 h | A2497 4 h | A2497P' 4 h | A2497 24 h | A2497P' 24 h | A2497 48 h | A2497P' 48 h | A2497 72 h | A2497P' 72 h |
|--------|--------------------------------------------------|----------------------|------------------------------------------------|-------------------------------------------|---------------|-----------------|-----------|-------------|-----------|-------------|------------|--------------|------------|--------------|------------|--------------|
| IL33   | interleukin 33                                   | chr9p24.1            | negative regulation of leukocyte migration     | ---                                       | 5.10          | 4.31            | 8.29      | 11.76       | 1.23      | 1.27        | -1.11      | -1.12        | 4.14       | 3.58         | 4.21       | 2.32         |
| IL4R   | interleukin 4 receptor                           | chr16p12.1-p11.2     | production of molecular mediator involved in   | Inflammatory_Response_Pathway // GenMAP   | 1.18          | 1.35            | 1.22      | -1.07       | 1.16      | 1.01        | 1.86       | 1.36         | 3.93       | 2.89         | 1.74       | 2.27         |
| IL6    | interleukin 6 (interferon, beta)                 | chr7p21              | neutrophil apoptotic process                   | Smooth_muscle_contraction // GenMAP       | 1.97          | 1.21            | 1.16      | 1.18        | 1.20      | 1.17        | 2.71       | 1.24         | 12.08      | 4.92         | 24.86      | 9.43         |
| IL6R   | interleukin 6 receptor                           | chr1q21              | hepatic immune response                        | ---                                       | -1.13         | -1.29           | -1.13     | -1.36       | -1.04     | 1.25        | -1.10      | -1.02        | 1.18       | 1.32         | -1.04      | 1.00         |
| IL6ST  | interleukin 6 signal transducer                  | chr5q11.2            | positive regulation of acute inflammatory      | ---                                       | 1.14          | 1.06            | -1.05     | 1.05        | -1.01     | -1.10       | 1.39       | 1.27         | 1.22       | 1.08         | 1.23       | 1.06         |
| IL7    | interleukin 7                                    | chr8q12-q13          | T cell lineage commitment                      | ---                                       | -1.18         | -1.07           | -1.05     | -1.28       | 1.44      | -1.09       | -1.25      | 1.10         | -1.52      | 1.24         | -1.27      | -1.06        |
| IL7R   | interleukin 7 receptor                           | chr5p13              | regulation of DNA recombination                | ---                                       | 1.27          | 1.03            | -1.17     | -1.36       | 1.16      | 1.05        | 1.65       | 1.43         | 6.96       | 4.20         | 7.90       | 5.88         |
| IL7R   | interleukin 7 receptor                           | chr5p13              | regulation of DNA recombination                | ---                                       | -1.06         | -1.05           | 1.01      | -1.05       | -1.15     | -1.04       | 1.50       | 1.31         | 5.28       | 3.80         | 6.55       | 6.30         |
| IL8    | interleukin 8                                    | chr4q13-q21          | angiogenesis                                   | ---                                       | -1.01         | 1.53            | 1.21      | 1.61        | 1.06      | -1.22       | 1.81       | 2.07         | 6.73       | 3.72         | 3.91       | 1.39         |
| IL8    | interleukin 8                                    | chr4q13-q21          | angiogenesis                                   | ---                                       | 1.94          | 2.09            | -1.09     | -1.02       | 1.26      | 1.35        | 5.23       | 2.99         | 12.39      | 5.73         | 5.40       | 2.12         |
| ILF3   | interleukin enhancer binding protein 3           | chr19p13.2           | M phase                                        | ---                                       | 1.17          | 1.29            | -1.02     | -1.16       | -1.12     | -1.12       | -1.19      | -1.03        | -1.31      | -1.42        | -1.62      | -1.96        |
| ILF3   | interleukin enhancer binding protein 3           | chr19p13.2           | M phase                                        | ---                                       | 1.16          | 1.06            | 1.05      | 1.06        | -1.04     | 1.12        | 1.03       | -1.01        | 1.24       | 1.33         | 1.19       | 1.18         |
| ILF3   | interleukin enhancer binding protein 3           | chr19p13.2           | M phase                                        | ---                                       | 1.10          | 1.05            | -1.00     | 1.04        | -1.08     | -1.11       | 1.11       | 1.01         | 1.54       | 1.42         | 1.51       | 1.46         |
| ILK    | integrin-linked kinase                           | chr11p15.4           | regulation of cell growth                      | Integrin-mediated_cell_adhesion_KEGG // C | 1.03          | -1.04           | 1.02      | 1.10        | 1.07      | -1.01       | 1.24       | 1.12         | 1.60       | 1.28         | 1.29       | 1.34         |
| ILKAP  | integrin-linked kinase-associated protein        | chr2q37.3            | protein dephosphorylation                      | ---                                       | -1.13         | -1.10           | 1.01      | 1.07        | 1.09      | -1.11       | 1.01       | -1.03        | -1.85      | -1.96        | -1.66      | -1.62        |
| ILVBL  | ilvB (bacterial acetolactate synthase)           | chr19p13.1           | metabolic process                              | ---                                       | -1.16         | -1.20           | 1.04      | 1.15        | 1.01      | -1.07       | 1.22       | 1.05         | 1.64       | 1.65         | 1.41       | 1.81         |
| ILVBL  | ilvB (bacterial acetolactate synthase)           | chr19p13.1           | metabolic process                              | ---                                       | 1.09          | -1.04           | 1.10      | 1.23        | -1.07     | -1.02       | 1.25       | 1.18         | 1.46       | 1.33         | 1.50       | 1.76         |
| ILVBL  | ilvB (bacterial acetolactate synthase)           | chr19p13.1           | metabolic process                              | ---                                       | 1.19          | -1.12           | 1.51      | 1.97        | 1.11      | -1.16       | 3.80       | 1.88         | 2.90       | 2.16         | 14.52      | 10.95        |
| IMMP1L | IMP1 inner mitochondrial membrane protein        | chr11p13             | proteolysis                                    | ---                                       | 1.27          | 1.33            | 1.14      | -1.23       | -1.14     | 1.03        | -1.49      | -1.10        | -1.71      | -1.66        | -1.36      | -1.55        |
| IMMT   | inner membrane protein, mitochondrial            | chr2p11.2/2          | response to cold                               | ---                                       | 1.15          | 1.17            | 1.05      | 1.08        | 1.01      | 1.05        | -1.03      | -1.11        | 1.01       | -1.02        | -1.09      | -1.26        |
| IMP4   | IMP4, U3 small nucleolar ribosomal protein       | chr2q21.1            | rRNA processing                                | ---                                       | 1.01          | -1.07           | -1.03     | 1.06        | -1.01     | -1.03       | 1.18       | 1.10         | 1.68       | 1.42         | 1.47       | 1.59         |
| IMPA2  | inositol(myo)-1(or 4)-monophosphatase            | chr18p11.2           | inositol biosynthetic process                  | ---                                       | -1.05         | -1.06           | -1.01     | 1.07        | -1.04     | -1.10       | 1.04       | 1.02         | -1.04      | -1.15        | -1.08      | 1.02         |
| IMPACT | impact RWD domain protein                        | chr18q11.2-q12.1     | negative regulation of protein phosphorylation | ---                                       | 1.31          | 1.08            | 1.14      | 1.12        | 1.19      | 1.26        | -1.02      | -1.07        | -1.18      | -1.21        | 1.09       | -1.32        |
| IMPAD1 | inositol monophosphatase                         | chr8q12.1            | skeletal system development                    | ---                                       | 1.07          | 1.16            | -1.04     | -1.17       | -1.13     | -1.13       | 1.09       | -1.01        | 1.43       | 1.59         | 2.01       | 1.40         |
| IMPAD1 | inositol monophosphatase                         | chr8q12.1            | endochondral ossification                      | ---                                       | -1.00         | 1.01            | 1.36      | 1.04        | 1.21      | 1.19        | -1.55      | -1.01        | 1.52       | 1.55         | 2.20       | 1.93         |
| IMPAD1 | inositol monophosphatase                         | chr8q12.1            | skeletal system development                    | ---                                       | 1.03          | 1.06            | -1.03     | -1.02       | 1.00      | -1.02       | -1.06      | -1.07        | 1.22       | 1.39         | 1.12       | 1.15         |
| IMPDH1 | IMP (inosine 5'-monophosphate) dehydrogenase     | chr7q31.3-q32        | purine nucleobase metabolic process            | Nucleotide_Metabolism // GenMAP           | -1.05         | -1.02           | -1.32     | -1.04       | 1.22      | 1.02        | 1.41       | 1.43         | 1.62       | 1.23         | 1.43       | 1.54         |
| IMPDH2 | IMP (inosine 5'-monophosphate) dehydrogenase     | chr3p21.2            | N-acetylmannosamine metabolic process          | ---                                       | -1.11         | -1.14           | -1.10     | -1.08       | 1.03      | -1.07       | 1.15       | 1.05         | 1.21       | 1.06         | -1.09      | 1.02         |
| INA    | interaxin neuronal intermediate filament protein | chr10q24.33          | multicellular organismal development           | ---                                       | -1.07         | -1.09           | -1.05     | -1.07       | 1.10      | 1.06        | 1.05       | 1.03         | -1.70      | -1.44        | -1.13      | -1.05        |
| INADL  | InaD-like (Drosophila)                           | chr1p31.3            | cell junction assembly                         | ---                                       | 1.51          | 1.75            | -2.24     | -1.58       | -1.09     | -1.24       | -1.81      | -1.04        | 1.04       | 1.54         | -1.39      | 1.37         |
| INADL  | InaD-like (Drosophila)                           | chr1p31.3            | cell junction assembly                         | ---                                       | -1.24         | -1.42           | -1.28     | -1.16       | -1.08     | -1.17       | 1.58       | 1.08         | 2.10       | 2.05         | 1.36       | 1.61         |
| INADL  | InaD-like (Drosophila)                           | chr1p31.3            | cell junction assembly                         | ---                                       | 1.15          | 1.03            | 1.14      | 1.42        | 1.07      | 1.17        | 1.13       | 1.03         | -1.68      | -1.25        | -1.53      | -1.34        |
| INCENP | inner centromere protein                         | chr11q12.3           | M phase of mitotic cell cycle                  | ---                                       | 1.04          | 1.23            | 1.89      | 1.62        | -2.40     | -1.63       | 1.87       | 1.42         | 1.10       | 1.72         | 1.03       | 1.03         |
| INF2   | inverted formin, FH2 and WH2 domain              | chr14q32.33          | cellular component organization                | ---                                       | -1.09         | -1.14           | -1.03     | 1.34        | 1.07      | -1.13       | 1.34       | 1.31         | 2.88       | 1.76         | 1.43       | 1.40         |
| ING1   | inhibitor of growth family, class A              | chr13q34             | protein import into nucleus                    | ---                                       | 1.17          | 1.05            | -1.12     | -1.11       | 1.11      | 1.17        | -1.08      | -1.10        | 1.03       | 1.17         | 1.29       | 1.13         |
| ING1   | inhibitor of growth family, class A              | chr13q34             | protein import into nucleus                    | ---                                       | -1.15         | -1.13           | -1.12     | 1.01        | 1.24      | 1.16        | 1.12       | 1.03         | 1.72       | 1.57         | 1.64       | 1.52         |
| ING1   | inhibitor of growth family, class A              | chr13q34             | protein import into nucleus                    | ---                                       | -1.23         | 1.08            | 1.16      | -1.11       | -1.35     | -1.07       | 1.28       | -1.17        | 2.20       | 1.96         | 1.86       | 1.55         |
| ING2   | inhibitor of growth family, class A              | chr4q35.1            | transcription, DNA-dependent                   | ---                                       | 1.06          | 1.01            | 1.08      | 1.03        | 1.03      | -1.11       | 1.46       | 1.62         | 1.80       | 1.48         | 1.38       | 1.45         |
| ING2   | inhibitor of growth family, class A              | chr4q35.1            | transcription, DNA-dependent                   | ---                                       | 1.05          | 1.06            | 1.05      | -1.03       | 1.08      | 1.14        | 1.38       | 1.37         | 1.37       | 1.43         | 1.21       | 1.24         |
| ING3   | inhibitor of growth family, class A              | chr7q31              | transcription, DNA-dependent                   | ---                                       | 1.83          | 1.54            | 1.03      | -1.05       | -1.04     | 1.17        | -1.46      | 1.12         | -8.00      | -7.19        | -8.57      | -13.59       |
| ING3   | inhibitor of growth family, class A              | chr7q31              | transcription, DNA-dependent                   | ---                                       | -1.23         | -1.08           | 1.05      | -1.01       | -1.06     | -1.04       | -1.27      | -1.11        | -1.51      | -1.40        | 1.02       | 1.10         |
| ING5   | inhibitor of growth family, class A              | chr2q37.3            | DNA replication                                | ---                                       | -1.02         | -1.35           | 1.01      | -1.10       | -1.03     | -1.07       | -1.30      | -1.18        | -1.68      | -1.59        | -1.49      | -1.66        |
| INHBE  | inhibin, beta E                                  | chr12q13.3           | growth                                         | ---                                       | 1.10          | 1.61            | 1.12      | -1.03       | -1.11     | -1.04       | -1.11      | -1.10        | -1.21      | -1.06        | 1.43       | 1.09         |
| INIP   | INTS3 and NABP interacting protein               | chr9q32              | DNA repair                                     | ---                                       | 1.04          | 1.75            | -1.61     | 1.19        | 1.33      | 1.18        | 1.96       | 1.68         | 1.51       | -1.24        | -2.01      | -3.39        |
| INIP   | NULL                                             | ---                  | DNA repair                                     | ---                                       | -1.03         | 1.03            | -1.07     | -1.00       | 1.01      | 1.06        | -1.19      | -1.17        | -1.78      | -1.41        | -1.44      | -1.57        |
| INIP   | INTS3 and NABP interacting protein               | chr9q32              | DNA repair                                     | ---                                       | 1.13          | 1.28            | 1.09      | -1.08       | 1.08      | 1.11        | 1.05       | -1.23        | -2.05      | -1.48        | -1.03      | -1.35        |
| INO80  | INO80 homolog (S. cerevisiae)                    | chr15q15.1           | mitotic sister chromatid segregation           | ---                                       | -1.03         | -1.00           | 1.06      | -1.11       | 1.06      | 1.06        | -1.21      | -1.37        | -1.51      | -2.08        | -1.07      | -1.22        |
| INO80  | INO80 homolog (S. cerevisiae)                    | chr15q15.1           | mitotic sister chromatid segregation           | ---                                       | -1.06         | 1.06            | 1.22      | -1.04       | 1.04      | -1.03       | -1.30      | -1.39        | -1.66      | -1.62        | -1.14      | -1.10        |
| INO80B | INO80 complex subunit B                          | chr2p13.1            | DNA repair                                     | ---                                       | -1.05         | -1.13           | 1.02      | -1.04       | -1.13     | 1.02        | 1.30       | -1.01        | -1.22      | -1.06        | -1.29      | -1.35        |
| INO80C | INO80 complex subunit C                          | chr18q12.2           | DNA repair                                     | ---                                       | 1.19          | 1.24            | -1.06     | -1.13       | -1.06     | 1.01        | -1.18      | -1.08        | 1.44       | 1.19         | 1.69       | 1.34         |
| INPP4A | inositol polyphosphate-4-phosphatase             | chr2q11.2            | phospholipid metabolic process                 | ---                                       | -1.02         | 1.21            | 1.15      | -1.08       | -1.01     | 1.05        | 1.03       | 1.77         | -3.62      | -2.89        | -1.28      | -4.68        |
| INPP4A | inositol polyphosphate-4-phosphatase             | chr2q11.2            | phospholipid metabolic process                 | ---                                       | 1.04          | 1.21            | -1.08     | 1.03        | 1.15      | 1.12        | -1.55      | -1.24        | -1.87      | -1.68        | -1.41      | -1.41        |
| INPP4A | inositol polyphosphate-4-phosphatase             | chr2q11.2            | phospholipid metabolic process                 | ---                                       | 1.27          | 1.01            | -1.12     | -1.17       | -1.03     | 1.08        | -1.41      | -1.37        | -1.55      | -1.24        | -1.24      | -1.20        |
| INPP4B | inositol polyphosphate-4-phosphatase             | chr4q31.21           | phospholipid metabolic process                 | ---                                       | 1.06          | -1.01           | 1.02      | 1.18        | -1.07     | -1.06       | 1.38       | 1.36         | 1.48       | 1.33         | 1.67       | 1.86         |
| INPP5B | inositol polyphosphate-5-phosphatase             | chr1p34              | in utero embryonic development                 | ---                                       | -1.07         | 1.02            | 1.34      | 1.31        | -1.23     | -1.32       | 1.30       | 1.02         | 1.65       | 1.25         | 1.27       | 1.76         |
| INPP5B | inositol polyphosphate-5-phosphatase             | chr1p34              | in utero embryonic development                 | ---                                       | 1.14          | 1.07            | -1.06     | -1.02       | -1.17     | 1.00        | 1.09       | -1.01        | -1.30      | -1.38        | -1.37      | -1.16        |
| INPP5E | inositol polyphosphate-5-phosphatase             | chr9q34.3            | lipid metabolic process                        | ---                                       | -1.09         | -1.12           | 1.15      | -1.02       | 1.08      | 1.27        | 1.21       | 1.08         | 1.03       | -1.05        | -1.27      | -1.35        |
| INPP5F | inositol polyphosphate-5-phosphatase             | chr10q26.11          | cardiac muscle hypertrophy in response to      | ---                                       | 1.75          | 1.45            | -1.46     | -1.07       | 1.23      | 1.12        | 1.71       | 1.24         | 1.27       | 1.69         | -1.46      | -1.44        |
| INPP5J | inositol polyphosphate-5-phosphatase             | chr22q12.2           | phospholipid metabolic process                 | ---                                       | -1.32         | -1.01           | 1.39      | 1.13        | 1.15      | 1.06        | 1.12       | 1.32         | -1.54      | -4.93        | -2.02      | -2.06        |
| INPP5K | inositol polyphosphate-5-phosphatase             | chr17p13.3           | in utero embryonic development                 | ---                                       | -1.14         | -1.21           | -1.10     | -1.07       | 1.14      | 1.07        | -1.11      | -1.10        | -1.70      | -1.98        | -1.43      | -1.18        |
| INSIG1 | insulin induced gene 1                           | chr7q36              | lipid metabolic process                        | ---                                       | 1.03          | -1.09           | 1.02      | 1.11        | -1.11     | 1.06        | 1.18       | 1.11         | 1.64       | 1.93         | 2.92       | 3.33         |
| INSIG1 | insulin induced gene 1                           | chr7q36              | lipid metabolic process                        | ---                                       | 1.09          | 1.07            | 1.02      | -1.03       | 1.04      | -1.00       | 1.18       | 1.02         | 1.56       | 1.86         | 2.80       | 3.07         |
| INSIG1 | insulin induced gene 1                           | chr7q36              | lipid metabolic process                        | ---                                       | 1.06          | 1.03            | -1.16     | -1.06       | -1.23     | -1.03       | -1.06      | -1.08        | 1.12       | 1.44         | 1.42       | 1.45         |
| INSIG2 | insulin induced gene 2                           | chr2p14.2            | lipid metabolic process                        | ---                                       | 1.06          | 1.01            | 1.11      | 1.04        | -1.03     | -1.04       | 1.22       | 1.03         | 1.39       | 1.81         | 1.27       | 1.74         |
| INSL4  | insulin-like 4 (placenta)                        | chr9p24              | signal transduction                            | ---                                       | -1.10         | -1.07           | 1.01      | 1.10        | -1.18     | -1.08       | -1.48      | -1.40        | -1.93      | -1.62        | -2.31      | -2.74        |
| INTS1  | integrator complex subunit 1                     | chr7p22.3            | blastocyst growth                              | ---                                       | 1.08          | 1.07            | 1.06      | 1.29        | 1.02      | -1.12       | 1.21       | 1.06         | 1.28       | 1.09         | -1.49      | -1.37        |

| ID             | Gene Title                    | Chromosomal Location | 1st Gene Ontology Biological Process      | Pathway                                | A2497 30 mins | A2497P' 30 mins | A2497 2 h | A2497P' 2 h | A2497 4 h | A2497P' 4 h | A2497 24 h | A2497P' 24 h | A2497 48 h | A2497P' 48 h | A2497 72 h | A2497P' 72 h |
|----------------|-------------------------------|----------------------|-------------------------------------------|----------------------------------------|---------------|-----------------|-----------|-------------|-----------|-------------|------------|--------------|------------|--------------|------------|--------------|
| INTS10         | integrator complex subunit    | chr8p21.3            | snRNA processing                          | ---                                    | 1.27          | 1.01            | 1.23      | -1.01       | 1.47      | 1.42        | -1.15      | -1.17        | -1.61      | -1.40        | -1.54      | -1.48        |
| INTS10         | integrator complex subunit    | chr8p21.3            | snRNA processing                          | ---                                    | -1.33         | -1.09           | 1.03      | 1.05        | 1.15      | 1.25        | -1.13      | -1.08        | -1.74      | -1.89        | -2.14      | -1.62        |
| INTS10         | integrator complex subunit    | chr8p21.3            | snRNA processing                          | ---                                    | 1.04          | 1.06            | 1.04      | -1.05       | 1.05      | 1.01        | 1.06       | 1.01         | 1.09       | -1.01        | 1.27       | 1.23         |
| INTS10         | integrator complex subunit    | chr8p21.3            | snRNA processing                          | ---                                    | -1.09         | -1.01           | 1.17      | 1.22        | 1.05      | 1.25        | 1.05       | 1.20         | -1.40      | -1.62        | -1.62      | -1.57        |
| INTS3          | integrator complex subunit    | chr1q21.3            | cell cycle checkpoint                     | ---                                    | -1.00         | 1.07            | 1.20      | 1.01        | 1.08      | 1.06        | -1.18      | -1.24        | -1.22      | -1.25        | -1.08      | -1.18        |
| INTS3          | integrator complex subunit    | chr1q21.3            | cell cycle checkpoint                     | ---                                    | 1.14          | 1.13            | 1.01      | -1.13       | -1.07     | 1.00        | -1.39      | -1.14        | -1.66      | -1.71        | -1.17      | -1.31        |
| INTS4          | integrator complex subunit    | chr11q14.1           | snRNA processing                          | ---                                    | -1.07         | 1.08            | 1.04      | -1.11       | -1.23     | -1.21       | 1.45       | 1.17         | 1.64       | 1.32         | 1.44       | 1.09         |
| INTS5          | integrator complex subunit    | chr11q12.3           | snRNA processing                          | ---                                    | -1.03         | 1.00            | -1.11     | -1.27       | -1.07     | 1.00        | -1.03      | -1.04        | -1.44      | -1.32        | 1.01       | 1.01         |
| INTS5          | integrator complex subunit    | chr11q12.3           | snRNA processing                          | ---                                    | -1.07         | -1.09           | -1.03     | -1.11       | -1.03     | 1.06        | -1.17      | -1.10        | -1.38      | -1.32        | -1.10      | -1.12        |
| INTS6          | integrator complex subunit    | chr13q14.3           | snRNA processing                          | ---                                    | 1.01          | 1.04            | -1.00     | -1.04       | 1.01      | 1.04        | -1.38      | 1.05         | 1.01       | -1.03        | 1.20       | 1.03         |
| INTS6          | integrator complex subunit    | chr13q14.3           | snRNA processing                          | ---                                    | 1.08          | 1.05            | 1.03      | -1.05       | -1.11     | -1.01       | -1.24      | 1.18         | 1.14       | 1.22         | 1.50       | 1.48         |
| INTS7          | integrator complex subunit    | chr1q32.3            | DNA damage checkpoint                     | ---                                    | 1.20          | 1.11            | 1.12      | 1.02        | -1.09     | 1.08        | -1.18      | -1.15        | -1.89      | -1.41        | -1.34      | -1.23        |
| INTS7          | integrator complex subunit    | chr1q32.3            | DNA damage checkpoint                     | ---                                    | 1.27          | 1.16            | -1.03     | -1.05       | -1.04     | -1.03       | 1.32       | 1.26         | -1.15      | -1.20        | 1.32       | 1.19         |
| INTS8          | integrator complex subunit    | chr8q22.1            | snRNA processing                          | ---                                    | 1.07          | 1.03            | -1.01     | -1.00       | -1.05     | -1.05       | -1.05      | -1.11        | -1.17      | -1.26        | -1.16      | ---          |
| INTS9          | integrator complex subunit    | chr8p21.1            | snRNA processing                          | ---                                    | -1.14         | -1.07           | 1.03      | 1.08        | -1.06     | -1.08       | 1.06       | -1.01        | -2.09      | -1.79        | -2.70      | -1.94        |
| INVS           | inversin                      | chr9q31              | kidney development                        | ---                                    | 1.09          | 1.00            | 1.07      | 1.18        | 1.05      | 1.07        | 1.13       | 1.05         | -1.65      | -1.47        | -1.83      | -1.78        |
| IP6K1          | inositol hexakisphosphate     | chr3p21.31           | phosphorylation                           | ---                                    | -1.17         | -1.30           | 1.01      | 1.09        | -1.02     | -1.10       | 1.05       | 1.11         | -1.46      | -1.34        | -1.23      | -1.05        |
| IP6K2          | inositol hexakisphosphate     | chr3p21.31           | phosphate ion transport                   | ---                                    | -1.01         | -1.06           | 1.01      | 1.11        | 1.13      | -1.04       | 1.37       | 1.17         | 1.25       | 1.05         | 1.11       | 1.03         |
| IP6K2          | inositol hexakisphosphate     | chr3p21.31           | phosphate ion transport                   | ---                                    | -1.04         | 1.01            | 1.01      | -1.08       | 1.02      | 1.03        | -1.35      | -1.24        | -1.49      | -1.60        | -1.05      | -1.07        |
| IPMK           | inositol polyphosphate mult   | chr10q21.1           | neural tube formation                     | ---                                    | -1.16         | -1.15           | 1.04      | 1.02        | 1.51      | -1.15       | 1.38       | 1.79         | -1.06      | 1.71         | 2.87       | 1.54         |
| IPO11 // IPO   | importin 11 // IPO11-LRR      | chr5q12.1            | ribosomal protein import into nucleus     | ---                                    | -1.01         | -1.01           | 1.08      | 1.05        | 1.07      | 1.01        | 1.03       | 1.01         | -1.13      | -1.07        | 1.31       | 1.17         |
| IPO11 // IPO   | importin 11 // IPO11-LRR      | chr5q12.1            | ribosomal protein import into nucleus     | ---                                    | -1.01         | -1.03           | -1.02     | -1.03       | 1.03      | 1.01        | -1.26      | -1.00        | -1.20      | -1.12        | 1.17       | 1.14         |
| IPO13          | importin 13                   | chr1p34.1            | protein import into nucleus               | ---                                    | -1.05         | -1.10           | -1.04     | 1.17        | -1.06     | -1.07       | 1.07       | -1.02        | -1.36      | 1.20         | 1.43       | ---          |
| IPO5           | importin 5                    | chr13q32.2           | NLS-bearing substrate import into nucleus | ---                                    | 1.04          | 1.17            | 1.10      | -1.19       | 1.05      | 1.25        | 1.12       | 1.10         | -1.21      | -1.25        | -1.28      | -1.61        |
| IPO5           | importin 5                    | chr13q32.2           | NLS-bearing substrate import into nucleus | ---                                    | 1.04          | 1.12            | 1.01      | -1.05       | -1.14     | -1.05       | -1.08      | -1.02        | -1.87      | -1.57        | -1.49      | -1.81        |
| IPO5           | importin 5                    | chr13q32.2           | NLS-bearing substrate import into nucleus | ---                                    | -1.04         | -1.07           | 1.02      | 1.04        | -1.00     | -1.02       | 1.23       | 1.05         | 1.18       | 1.01         | 1.21       | 1.28         |
| IPO8           | importin 8                    | chr12p11.21          | transport                                 | ---                                    | 1.07          | 1.06            | -1.03     | 1.04        | -1.04     | -1.02       | -1.09      | -1.09        | -1.15      | -1.11        | -1.16      | -1.23        |
| IPO9           | importin 9                    | chr1q32.1            | protein import into nucleus               | ---                                    | -1.09         | -1.15           | 1.06      | -1.08       | -1.02     | 1.14        | -1.16      | -1.03        | -1.95      | -1.51        | -1.48      | -1.24        |
| IPO9           | importin 9                    | chr1q32.1            | protein import into nucleus               | ---                                    | -1.02         | -1.06           | 1.02      | -1.02       | 1.01      | -1.05       | 1.11       | 1.06         | -1.46      | -1.34        | -1.51      | -1.41        |
| IPO9           | importin 9                    | chr1q32.1            | protein import into nucleus               | ---                                    | 1.01          | -1.09           | 1.18      | 1.20        | 1.23      | -1.05       | 1.11       | 1.19         | -1.22      | -1.55        | -1.95      | -1.50        |
| IPO9           | importin 9                    | chr1q32.1            | protein import into nucleus               | ---                                    | -1.07         | -1.10           | 1.03      | 1.10        | -1.10     | -1.03       | -1.08      | 1.03         | -1.36      | -1.48        | -1.20      | -1.05        |
| IPP            | intracisternal A particle-pro | chr1p34-p32          | 0                                         | ---                                    | -1.02         | -1.03           | -1.08     | -1.36       | -1.01     | 1.07        | -1.01      | 1.03         | -1.50      | -1.35        | -1.35      | -1.43        |
| IPPK           | inositol 1,3,4,5,6-pentakisph | chr9q22.31           | phosphorylation                           | ---                                    | 1.15          | 1.18            | 1.17      | 1.01        | 1.46      | 1.24        | -1.17      | 1.00         | -1.15      | 1.09         | 1.40       | 1.64         |
| IPW // LOC1    | imprinted in Prader-Willi     | chr15q11-q12 // chr  | 0                                         | ---                                    | 3.15          | 2.05            | 1.02      | -1.28       | -1.95     | -1.34       | -1.24      | -1.18        | -3.87      | -3.36        | -2.24      | -3.52        |
| IPW // LOC1    | imprinted in Prader-Willi     | chr15q11-q12 // chr  | mRNA splicing                             | mRNA_processing_binding_Reactome // Ge | 1.10          | 1.09            | -1.01     | -1.03       | -1.41     | -1.01       | -1.29      | -3.03        | -2.31      | -4.10        | -3.56      | ---          |
| IPW // LOC1    | imprinted in Prader-Willi     | chr15q11-q12 // chr  | mRNA splicing                             | mRNA_processing_binding_Reactome // Ge | 1.00          | 1.10            | -1.02     | 1.04        | -1.11     | -1.15       | 1.20       | 1.16         | -1.90      | -1.18        | -2.58      | -2.56        |
| IQCA1          | IQ motif containing with A    | chr2q37.3            | 0                                         | ---                                    | 1.69          | -1.29           | -1.07     | 1.09        | -3.59     | -1.27       | -1.71      | -2.53        | -1.17      | -1.40        | -1.41      | 1.18         |
| IQCA1          | IQ motif containing with A    | chr2q37.3            | 0                                         | ---                                    | 1.19          | 1.24            | 1.09      | -1.00       | -1.62     | -1.21       | 1.10       | 1.17         | -1.65      | -1.75        | -1.22      | -1.73        |
| IQCD           | IQ motif containing D         | chr12q24.13          | 0                                         | ---                                    | 1.02          | 1.07            | 1.80      | 1.21        | -1.40     | -1.45       | 1.62       | 1.21         | 1.01       | -1.20        | 2.12       | 1.93         |
| IQCE           | IQ motif containing E         | chr7p22.3            | 0                                         | ---                                    | 1.08          | -1.01           | 1.05      | -1.12       | 1.21      | 1.06        | 1.13       | 1.04         | -1.96      | -1.83        | -2.16      | -1.70        |
| IQCF1          | IQ motif containing F1        | chr3p21.2            | 0                                         | ---                                    | -1.95         | -1.43           | -1.28     | 1.70        | 1.56      | 1.69        | -1.44      | -1.11        | 17.90      | 8.71         | 1.71       | -1.15        |
| IQCG           | IQ motif containing G         | chr3q29              | 0                                         | ---                                    | 1.26          | 1.30            | 1.35      | 1.16        | -1.01     | -1.03       | 1.23       | -1.16        | -1.40      | -1.57        | -1.54      | -1.18        |
| IQCG           | IQ motif containing G         | chr3q29              | 0                                         | ---                                    | -1.01         | -1.01           | 1.21      | 1.27        | -1.25     | -1.00       | 1.42       | 1.37         | -3.04      | -1.66        | -10.16     | -4.02        |
| IQCH-AS1       | IQCH antisense RNA 1          | chr15q23             | 0                                         | ---                                    | -1.07         | -1.29           | -1.16     | -1.23       | -1.02     | 1.05        | -1.38      | -1.04        | -4.08      | -3.56        | -3.47      | -3.14        |
| IQCK           | IQ motif containing K         | chr16p12.3           | 0                                         | ---                                    | 1.09          | -1.00           | -1.03     | -1.03       | -1.02     | -1.17       | 1.01       | 1.06         | -1.36      | -1.22        | -1.38      | -1.18        |
| IQGAP1         | IQ motif containing GTPase    | chr15q26.1           | regulation of cytokine production         | G13_Signaling_Pathway // GenMAPP       | -1.23         | -1.15           | 1.08      | -1.05       | 1.19      | 1.05        | 1.25       | 1.05         | 1.19       | 1.13         | 1.20       | 1.32         |
| IQGAP2         | IQ motif containing GTPase    | chr5q13.3            | signal transduction                       | G13_Signaling_Pathway // GenMAPP       | 1.04          | -1.17           | 1.28      | -1.02       | 1.19      | -1.22       | -1.28      | -3.47        | -1.34      | -1.77        | -3.76      | ---          |
| IQGAP3         | IQ motif containing GTPase    | chr1q21.3            | G1                                        | ---                                    | 2.08          | 1.39            | 1.49      | 2.11        | 1.14      | 1.02        | -1.90      | 1.08         | 2.54       | 1.59         | 1.02       | -1.16        |
| IQSEC2         | IQ motif and Sec7 domain      | chrXp11.22           | vesicle-mediated transport                | ---                                    | 1.01          | 1.04            | 1.03      | 1.04        | 1.04      | -1.14       | 1.27       | 1.21         | 1.44       | 1.50         | 1.47       | 1.69         |
| IQSEC3 // LOC1 | IQ motif and Sec7 domain      | chr12p13.33          | vesicle-mediated transport                | ---                                    | 1.07          | 1.70            | -1.47     | -2.43       | -7.89     | -2.76       | -3.04      | 2.01         | 4.48       | 2.07         | -2.36      | -3.04        |
| IRAK1          | interleukin-1 receptor-asso   | chrXq28              | activation of MAPK activity               | ---                                    | -1.07         | -1.04           | -1.03     | 1.04        | -1.02     | -1.10       | 1.27       | 1.24         | 1.43       | 1.25         | 1.09       | 1.16         |
| IRAK1BP1       | interleukin-1 receptor-asso   | chr6q14-q15          | transcription, DNA-dependent              | ---                                    | 1.20          | -1.09           | -1.30     | -1.24       | 1.15      | 1.20        | -1.11      | 1.06         | -4.44      | -3.22        | -2.55      | -2.48        |
| IRAK1BP1       | interleukin-1 receptor-asso   | chr6q14-q15          | transcription, DNA-dependent              | ---                                    | 1.10          | 1.01            | 1.18      | 1.25        | 1.03      | 1.25        | -1.03      | 1.05         | -2.14      | -1.97        | -1.38      | -1.57        |
| IRAK2          | interleukin-1 receptor-asso   | chr3p25.3            | activation of MAPK activity               | ---                                    | 1.01          | -1.03           | 1.00      | -1.10       | -1.04     | 1.06        | 1.98       | 1.59         | 3.50       | 2.77         | 2.13       | 1.69         |
| IRAK3          | interleukin-1 receptor-asso   | chr12q14.3           | negative regulation of cytokine-mediated  | ---                                    | 1.28          | 1.58            | 1.37      | 1.28        | -1.18     | 1.11        | -1.29      | -1.18        | -1.74      | -1.68        | -1.63      | -2.22        |
| IREB2          | iron-responsive element bin   | chr15q25.1           | regulation of translation                 | ---                                    | 1.09          | -1.17           | -1.18     | 1.45        | -1.30     | -1.22       | 2.53       | 1.33         | 2.25       | 3.39         | 1.83       | 1.85         |
| IREB2          | iron-responsive element bin   | chr15q25.1           | regulation of translation                 | ---                                    | -1.03         | -1.01           | -1.04     | -1.00       | -1.07     | 1.10        | -1.29      | -1.17        | -1.30      | -1.16        | -1.19      | -1.27        |
| IREB2          | iron-responsive element bin   | chr15q25.1           | regulation of translation                 | ---                                    | -1.30         | 1.21            | -1.04     | -1.06       | -1.31     | 1.09        | 1.15       | -1.56        | -3.87      | -1.61        | -1.63      | -2.90        |
| IRF1           | interferon regulatory factor  | chr5q31.1            | regulation of adaptive immune response    | Apoptosis // GenMAPP                   | -1.13         | 1.02            | -1.04     | -1.03       | 1.14      | 1.06        | 1.33       | 1.45         | 1.54       | 1.34         | 1.42       | 1.29         |
| IRF1           | interferon regulatory factor  | chr5q31.1            | regulation of adaptive immune response    | Apoptosis // GenMAPP                   | 1.10          | -1.03           | 1.08      | 1.12        | -1.01     | 1.03        | 1.16       | 1.27         | 1.53       | 1.12         | 1.32       | 1.18         |
| IRF2BP1        | interferon regulatory factor  | chr14q24.3           | 0                                         | ---                                    | 1.11          | 1.13            | -1.06     | 1.05        | -1.20     | 1.10        | -1.09      | -1.08        | 1.30       | 1.20         | 1.10       | 1.02         |
| IRF7           | interferon regulatory factor  | chr1p15.5            | negative regulation of transcription from | Apoptosis // GenMAPP                   | 1.30          | 1.37            | 1.18      | 1.50        | -1.34     | -1.43       | 2.01       | 1.83         | 2.93       | 2.01         | 1.78       | 1.73         |
| IRF8           | interferon regulatory factor  | chr16q24.1           | negative regulation of transcription from | ---                                    | 1.28          | 1.45            | -1.89     | -1.13       | -1.02     | -2.02       | 1.58       | 1.08         | -1.07      | 1.22         | 1.02       | 1.26         |
| IRF9           | interferon regulatory factor  | chr14q11.2           | protein polyubiquitination                | ---                                    | 1.31          | 1.28            | 1.19      | 1.09        | 1.02      | -1.10       | 2.27       | 1.50         | 1.20       | 1.56         | 1.41       | 1.41         |
| IRGQ           | immunity-related GTPase       | chr19q13.31          | 0                                         | ---                                    | -1.02         | -1.06           | 1.12      | 1.08        | 1.09      | 1.12        | -1.01      | -1.04        | -1.26      | -1.21        | -2.10      | -2.21        |
| IRGQ           | immunity-related GTPase       | chr19q13.31          | 0                                         | ---                                    | -1.15         | -1.16           | 1.19      | 1.17        | 1.15      | 1.26        | -1.11      | -1.03        | -1.28      | 1.09         | -2.04      | -1.73        |

| ID            | Gene Title                               | Chromosomal Location | 1st Gene Ontology Biological Process           | Pathway                                    | A2497 30 mins | A2497P' 30 mins | A2497 2 h | A2497P' 2 h | A2497 4 h | A2497P' 4 h | A2497 24 h | A2497P' 24 h | A2497 48 h | A2497P' 48 h | A2497 72 h | A2497P' 72 h |
|---------------|------------------------------------------|----------------------|------------------------------------------------|--------------------------------------------|---------------|-----------------|-----------|-------------|-----------|-------------|------------|--------------|------------|--------------|------------|--------------|
| IRGQ          | immunity-related GTPase                  | chr19q13.31          | 0                                              | ---                                        | -1.13         | -1.17           | 1.09      | 1.05        | 1.11      | 1.16        | -1.03      | -1.10        | -1.25      | -1.13        | -2.22      | -2.17        |
| IRS1          | insulin receptor substrate 1             | chr2q36              | positive regulation of mesenchymal cell        | ---                                        | -1.06         | 1.02            | 1.14      | 1.09        | -1.03     | 1.08        | -1.09      | 1.01         | -1.52      | -1.41        | -1.41      | -1.25        |
| IRS1          | insulin receptor substrate 1             | chr2q36              | positive regulation of mesenchymal cell        | ---                                        | 1.06          | 1.15            | 1.09      | -1.51       | -1.49     | -1.04       | -1.80      | 1.02         | -3.36      | -3.64        | -1.88      | -3.38        |
| IRS1          | insulin receptor substrate 1             | chr2q36              | positive regulation of mesenchymal cell        | ---                                        | 1.54          | 1.16            | -1.01     | -1.18       | -1.10     | -1.08       | -1.49      | -1.68        | -2.49      | -4.03        | -2.59      | -2.53        |
| IRX5          | iroquois homeobox 5                      | chr16q12.2           | regulation of heart rate                       | ---                                        | 1.14          | 1.21            | -1.11     | 1.12        | -1.37     | -1.33       | 1.30       | 1.01         | -1.10      | -1.48        | -1.23      | -1.57        |
| ISCA1         | iron-sulfur cluster assembly             | chr9q21.33           | iron-sulfur cluster assembly                   | ---                                        | 1.03          | -1.06           | 1.04      | 1.09        | -1.04     | 1.02        | -1.02      | 1.03         | 1.32       | 1.34         | 1.54       | 1.75         |
| ISCA1         | iron-sulfur cluster assembly             | chr9q21.33           | iron-sulfur cluster assembly                   | ---                                        | 1.15          | 1.05            | 1.19      | 1.29        | -1.03     | 1.20        | -1.08      | -1.07        | -1.22      | -1.17        | 1.11       | 1.04         |
| ISCA1         | iron-sulfur cluster assembly             | chr9q21.33           | iron-sulfur cluster assembly                   | ---                                        | 1.09          | -1.07           | 1.05      | 1.05        | 1.14      | -1.01       | 1.13       | 1.08         | 1.40       | 1.23         | 1.49       | 1.49         |
| ISG15         | ISG15 ubiquitin-like modifier            | chr1p36.33           | cell-cell signaling                            | ---                                        | 1.02          | -1.07           | -1.05     | -1.02       | 1.09      | -1.02       | 4.08       | 2.65         | 4.35       | 2.68         | 2.77       | 1.88         |
| ISG20         | interferon stimulated exonuclease        | chr15q26             | DNA catabolic process, exonucleolytic          | ---                                        | -1.20         | -1.21           | 1.08      | 1.27        | 1.01      | -1.10       | 3.32       | 2.08         | 5.66       | 3.94         | 3.06       | 3.02         |
| ISG20         | interferon stimulated exonuclease        | chr15q26             | DNA catabolic process, exonucleolytic          | ---                                        | 1.05          | -1.09           | 1.03      | -1.04       | 1.10      | -1.00       | 3.29       | 2.18         | 5.06       | 3.23         | 2.91       | 3.09         |
| ISL1          | ISL LIM homeobox 1                       | chr5q11.1            | negative regulation of transcription from      | ---                                        | 1.01          | 1.00            | -1.13     | -1.07       | -1.11     | -1.04       | -1.51      | -1.05        | -2.34      | -1.95        | -2.35      | -2.84        |
| ISL2          | ISL LIM homeobox 2                       | chr15q23             | regulation of transcription, DNA-depend        | ---                                        | 1.06          | -1.13           | 1.20      | 1.40        | 1.08      | -1.17       | 1.06       | -1.08        | 1.83       | 1.28         | 1.34       | 1.29         |
| ISM2          | isthmin 2                                | chr14q24.3           | 0                                              | ---                                        | 1.25          | -1.73           | 1.15      | 3.95        | 1.37      | -2.37       | -3.68      | 1.09         | 7.70       | 10.07        | 4.32       | 3.19         |
| ISOC2         | isochorismatase domain containing        | chr19q13.42          | metabolic process                              | ---                                        | -1.17         | -1.28           | -1.06     | -1.01       | 1.12      | -1.00       | -1.04      | 1.01         | 1.25       | 1.13         | 1.42       | 1.74         |
| IST1          | increased sodium tolerance               | chr16q22.2           | cytokinesis                                    | ---                                        | 1.23          | -1.09           | -1.40     | -1.05       | 1.11      | 1.13        | 1.08       | 1.12         | 1.79       | 2.04         | 1.53       | 1.87         |
| ISY1          | ISY1 splicing factor homolog             | chr3q21.3            | mRNA splicing, via spliceosome                 | ---                                        | -1.16         | -1.45           | 1.19      | -1.26       | 1.24      | 1.21        | -1.02      | -1.09        | 1.20       | 1.08         | 1.52       | 1.46         |
| ISY1-RAB43    | ISY1-RAB43 readthrough                   | chr3q // chr3q21.3   | mRNA splicing, via spliceosome                 | ---                                        | 1.35          | 1.18            | -1.07     | -1.08       | 1.12      | 1.22        | -1.13      | 1.00         | 3.04       | 2.89         | 1.94       | 1.89         |
| ISYNA1        | inositol 3-phosphate synthase            | chr19p13.11          | inositol biosynthetic process                  | ---                                        | -1.14         | -1.33           | -1.02     | 1.56        | 1.16      | -1.06       | 1.21       | 1.15         | 2.05       | 1.79         | -1.17      | -1.18        |
| ISYNA1        | inositol 3-phosphate synthase            | chr19p13.11          | inositol biosynthetic process                  | ---                                        | 1.02          | 1.03            | 1.10      | 1.42        | -1.08     | -1.19       | 1.36       | 1.37         | 1.19       | 1.10         | -1.51      | -1.36        |
| ITCH          | itchy E3 ubiquitin protein ligase        | chr20q11.22          | protein polyubiquitination                     | ---                                        | -1.07         | 1.07            | 1.24      | 1.27        | 1.02      | 1.14        | 1.28       | 1.33         | 1.58       | 1.43         | 3.12       | 3.10         |
| ITCH          | itchy E3 ubiquitin protein ligase        | chr20q11.22          | protein polyubiquitination                     | ---                                        | -1.06         | -1.03           | 1.24      | 1.14        | 1.27      | 1.09        | 1.22       | 1.29         | 1.49       | 1.40         | 3.32       | 3.05         |
| ITCH          | itchy E3 ubiquitin protein ligase        | chr20q11.22          | protein polyubiquitination                     | ---                                        | -1.12         | -1.15           | 1.26      | 1.30        | 1.17      | 1.01        | -1.21      | -1.27        | 1.07       | 1.11         | 2.25       | 2.35         |
| ITFG1         | integrin alpha FG-GAP repeat             | chr16q12.1           | 0                                              | ---                                        | 1.04          | 1.07            | 1.08      | -1.01       | -1.00     | -1.04       | -1.03      | -1.04        | -1.06      | -1.03        | 1.39       | 1.32         |
| ITFG1         | integrin alpha FG-GAP repeat             | chr16q12.1           | 0                                              | ---                                        | 1.16          | 1.05            | 1.05      | -1.11       | 1.11      | 1.17        | -1.13      | -1.05        | -1.78      | -1.45        | -2.35      | -1.92        |
| ITFG1         | integrin alpha FG-GAP repeat             | chr16q12.1           | 0                                              | ---                                        | 1.22          | 1.34            | 1.03      | -1.03       | -1.17     | 1.01        | -1.31      | -1.16        | -1.83      | -1.93        | -1.79      | -1.66        |
| ITFG2         | integrin alpha FG-GAP repeat             | chr12p13.33          | 0                                              | ---                                        | 1.03          | -1.49           | 1.28      | -1.34       | 1.00      | 1.06        | 1.13       | 1.22         | -1.51      | -1.83        | -1.39      | -1.75        |
| ITFG2 /// LOK | integrin alpha FG-GAP repeat             | chr12p13.33          | 0                                              | ---                                        | -1.02         | 1.08            | 1.17      | 1.18        | 1.02      | 1.11        | 1.19       | 1.12         | -1.09      | -1.18        | -1.49      | -1.19        |
| ITFG2 /// LOK | integrin alpha FG-GAP repeat             | chr12p13.33          | 0                                              | ---                                        | 1.08          | 1.10            | 1.08      | 1.22        | 1.14      | 1.05        | 1.05       | 1.47         | -1.43      | -1.97        | -1.54      | -1.41        |
| ITGA1         | integrin, alpha 1                        | chr5q11.2            | activation of MAPK activity                    | Integrin-mediated_cell_adhesion_KEGG // C  | -1.11         | -1.16           | -1.08     | -1.03       | -1.05     | 1.02        | 1.34       | 1.17         | -1.05      | -1.12        | -1.68      | -1.47        |
| ITGA11        | integrin, alpha 11                       | chr15q23             | cell adhesion                                  | Integrin-mediated_cell_adhesion_KEGG // C  | 1.27          | -2.49           | 1.05      | 1.35        | -1.19     | -1.02       | 1.29       | -1.39        | -1.54      | -1.25        | -3.06      | -1.77        |
| ITGA2         | integrin, alpha 2 (CD49B)                | chr5q11.2            | cell adhesion                                  | Integrin-mediated_cell_adhesion_KEGG // C  | 1.21          | -1.09           | -1.13     | 1.07        | 1.17      | 1.23        | 1.90       | 1.58         | 2.02       | 2.11         | 1.60       | 1.84         |
| ITGA2         | integrin, alpha 2 (CD49B)                | chr5q11.2            | cell adhesion                                  | Integrin-mediated_cell_adhesion_KEGG // C  | 1.26          | 1.26            | 1.06      | -1.02       | -1.20     | 1.10        | 1.44       | 1.11         | 1.67       | 1.57         | 1.68       | 1.53         |
| ITGA2B        | integrin, alpha 2b (platelet)            | chr17q21.32          | platelet degranulation                         | Integrin-mediated_cell_adhesion_KEGG // C  | 1.28          | -1.33           | -4.38     | -1.53       | 1.44      | 1.05        | -1.44      | 1.28         | 2.41       | 1.86         | 1.98       | 2.15         |
| ITGA3         | integrin, alpha 3 (antigen)              | chr17q21.33          | neuron migration                               | Integrin-mediated_cell_adhesion_KEGG // C  | -1.09         | -1.10           | -1.12     | 1.19        | 1.02      | -1.10       | 1.00       | 1.21         | 1.82       | 1.73         | 1.58       | 2.02         |
| ITGA5         | integrin, alpha 5 (fibronectin)          | chr12q11-q13         | angiogenesis                                   | Integrin-mediated_cell_adhesion_KEGG // C  | -1.08         | -1.18           | -1.01     | 1.06        | 1.15      | -1.09       | 1.37       | 1.19         | 2.29       | 2.03         | 2.18       | 2.71         |
| ITGA7         | integrin, alpha 7                        | chr12q13             | cell adhesion                                  | Integrin-mediated_cell_adhesion_KEGG // C  | 1.43          | 1.38            | -1.40     | -1.09       | -1.70     | -1.80       | -1.03      | -1.10        | -2.18      | -1.55        | -1.26      | -1.31        |
| ITGB1         | integrin, beta 1 (fibronectin)           | chr10p11.2           | G1                                             | Integrin-mediated_cell_adhesion_KEGG // C  | 1.38          | 1.67            | -1.24     | -1.08       | 1.27      | 1.21        | -1.65      | 1.19         | 1.14       | -1.23        | -1.38      | -1.33        |
| ITGB1         | integrin, beta 1 (fibronectin)           | chr10p11.2           | G1                                             | Integrin-mediated_cell_adhesion_KEGG // C  | 1.17          | 1.07            | 1.11      | 1.06        | 1.19      | 1.04        | 1.18       | 1.02         | 1.15       | 1.17         | 1.40       | 1.22         |
| ITGB1BP1      | integrin beta 1 binding protein          | chr2p25.2            | angiogenesis                                   | ---                                        | 1.05          | -1.03           | -1.05     | 1.01        | -1.18     | 1.05        | 1.02       | 1.06         | -1.28      | -1.37        | -1.42      | -1.37        |
| ITGB3         | integrin, beta 3 (platelet glycoprotein) | chr17q21.32          | positive regulation of protein phosphorylation | Integrin-mediated_cell_adhesion_KEGG // C  | 2.03          | 1.94            | 2.09      | 2.08        | -3.57     | 1.25        | 1.13       | -1.59        | 5.29       | 5.98         | 6.20       | 4.80         |
| ITGB4         | integrin, beta 4                         | chr17q25             | cell adhesion                                  | ---                                        | -1.24         | -1.35           | 1.24      | 1.42        | 1.32      | 1.27        | 1.06       | -1.00        | 1.24       | 1.17         | 1.31       | 1.64         |
| ITGB4         | integrin, beta 4                         | chr17q25             | cell communication                             | Integrin-mediated_cell_adhesion_KEGG // C  | -1.21         | 1.00            | -1.31     | 1.00        | -1.70     | -1.87       | -1.80      | -1.18        | 1.11       | 1.33         | -1.19      | 1.22         |
| ITGB4         | integrin, beta 4                         | chr17q25             | cell communication                             | Integrin-mediated_cell_adhesion_KEGG // C  | -1.34         | -1.94           | 1.68      | 1.43        | -1.04     | 1.25        | 1.06       | -1.31        | 1.35       | 1.17         | 1.19       | 1.64         |
| ITGB4         | integrin, beta 4                         | chr17q25             | cell communication                             | Integrin-mediated_cell_adhesion_KEGG // C  | 1.01          | -1.10           | -1.03     | 1.16        | 1.00      | 1.03        | 1.57       | 1.44         | 1.94       | 1.42         | 1.39       | 1.61         |
| ITGB6         | integrin, beta 6                         | chr2q24.2            | inflammatory response                          | Integrin-mediated_cell_adhesion_KEGG // C  | 1.00          | 1.27            | -1.50     | 1.29        | -2.36     | -1.22       | -1.71      | -1.41        | 1.97       | 1.61         | 1.55       | 1.73         |
| ITGB8         | integrin, beta 8                         | chr7p21.1            | ganglioside metabolic process                  | Integrin-mediated_cell_adhesion_KEGG // C  | -1.20         | 1.35            | -1.33     | -1.20       | 1.08      | 1.35        | 1.01       | 1.02         | -1.83      | -2.12        | 1.99       | 1.43         |
| ITGB8         | integrin, beta 8                         | chr7p21.1            | ganglioside metabolic process                  | Integrin-mediated_cell_adhesion_KEGG // C  | 1.47          | 1.08            | -1.10     | -1.04       | 1.09      | 1.58        | 1.87       | 1.83         | 1.31       | 1.29         | 1.84       | 1.72         |
| ITGB8         | integrin, beta 8                         | chr7p21.1            | ganglioside metabolic process                  | Integrin-mediated_cell_adhesion_KEGG // C  | -1.12         | -1.07           | 1.68      | -1.00       | 1.32      | 1.29        | 1.68       | 1.13         | 1.34       | -1.13        | 2.59       | 2.10         |
| ITGBL1        | integrin, beta-like 1 (with EGF)         | chr13q33             | cell adhesion                                  | ---                                        | -1.36         | 1.34            | 2.13      | -1.06       | 1.25      | -1.51       | -2.24      | 1.29         | -4.30      | -3.70        | -5.62      | -3.33        |
| ITM2A         | integral membrane protein                | chrXq13.3-Xq21.2     | 0                                              | ---                                        | -1.16         | -1.19           | -1.52     | -1.59       | 1.27      | 1.04        | 1.34       | 1.17         | -1.07      | -1.03        | -1.72      | -1.32        |
| ITM2C         | integral membrane protein                | chr2q37              | negative regulation of neuron projection       | ---                                        | -1.08         | -1.13           | 1.01      | -1.15       | -1.05     | -1.11       | 1.09       | -1.06        | -1.07      | 1.00         | 1.18       | 1.14         |
| ITPK1         | inositol-tetrakisphosphate 3-kinase      | chr14q31             | signal transduction                            | ---                                        | 1.01          | 1.00            | -1.11     | -1.01       | 1.08      | -1.05       | 1.13       | 1.05         | 1.63       | 1.33         | 1.14       | 1.17         |
| ITPKA         | inositol-trisphosphate 3-kinase          | chr15q15.1           | inositol metabolic process                     | ---                                        | 1.61          | 1.61            | -1.04     | -1.38       | -4.09     | -1.88       | -1.44      | 1.22         | 1.62       | 2.08         | 1.40       | 1.83         |
| ITPKB         | inositol-trisphosphate 3-kinase          | chr1q42.13           | MAPK cascade                                   | ---                                        | 2.26          | 1.70            | 1.82      | 1.47        | -1.41     | -1.41       | 1.14       | -1.09        | -1.31      | -3.10        | -3.09      | -20.96       |
| ITPKC         | inositol-trisphosphate 3-kinase          | chr19q13.1           | phosphorylation                                | ---                                        | 1.22          | 1.26            | 1.07      | 1.18        | -1.43     | -1.11       | -1.06      | 1.05         | 1.52       | 1.19         | 1.20       | 1.33         |
| ITPR1         | inositol 1,4,5-trisphosphate receptor    | chr3p26.1            | response to hypoxia                            | Calcium_regulation_in_cardiac_cells // Gen | 1.06          | -1.05           | 1.19      | -1.19       | 1.15      | 1.18        | 1.04       | -1.04        | -1.77      | -1.64        | -1.73      | -1.54        |
| ITPR1-AS1     | ITPR1 antisense RNA 1 (homo)             | ---                  | 0                                              | ---                                        | -1.64         | -1.52           | -1.32     | -1.11       | 1.69      | 2.62        | 1.02       | -1.23        | 1.23       | 1.34         | 1.31       | 1.52         |
| ITPR2         | inositol 1,4,5-trisphosphate receptor    | chr12p11             | response to hypoxia                            | Calcium_regulation_in_cardiac_cells // Gen | 1.23          | 1.22            | -1.06     | -1.02       | -1.16     | 1.05        | 1.06       | 1.07         | -1.85      | -1.36        | -1.56      | -1.87        |
| ITPR2         | inositol 1,4,5-trisphosphate receptor    | chr12p11             | response to hypoxia                            | Calcium_regulation_in_cardiac_cells // Gen | -1.25         | -1.10           | 1.15      | 1.06        | 1.10      | -1.06       | -1.21      | -1.33        | -2.09      | -1.11        | -1.25      | -1.54        |
| ITPR2         | inositol 1,4,5-trisphosphate receptor    | chr12p11             | response to hypoxia                            | Calcium_regulation_in_cardiac_cells // Gen | 1.23          | -1.02           | 1.25      | 1.42        | -1.08     | -1.07       | 1.09       | 1.02         | 1.03       | -1.19        | -1.20      | -1.32        |
| ITPRIP        | inositol 1,4,5-trisphosphate receptor    | chr10q25.1           | negative regulation of protein kinase acti     | ---                                        | 1.27          | 1.12            | 1.10      | -1.04       | 1.05      | 1.09        | 1.78       | 1.33         | 1.51       | 1.32         | 1.00       | -1.27        |
| ITPRIP        | inositol 1,4,5-trisphosphate receptor    | chr10q25.1           | negative regulation of protein kinase acti     | ---                                        | -1.08         | -1.11           | 1.04      | 1.21        | 1.06      | -1.06       | 1.51       | 1.29         | 2.84       | 1.94         | 1.48       | 1.47         |
| ITPRIPL2      | inositol 1,4,5-trisphosphate receptor    | chr16p12.3           | 0                                              | ---                                        | -1.02         | -1.03           | 1.01      | -1.03       | -1.03     | -1.02       | 1.09       | 1.12         | -1.22      | -1.24        | -1.02      | -1.06        |
| ITPRIPL2      | inositol 1,4,5-trisphosphate receptor    | chr16p12.3           | 0                                              | ---                                        | -1.20         | -1.08           | 1.12      | 1.13        | -1.13     | -1.02       | 1.10       | 1.34         | -1.34      | -1.45        | -1.00      | 1.03         |
| ITSN1         | intersectin 1 (SH3 domain)               | chr21q22.1-q22.2     | endocytosis                                    | ---                                        | 1.04          | 1.04            | -1.04     | -1.01       | -1.12     | 1.10        | -1.35      | -1.19        | -1.54      | -1.25        | -1.32      | -1.22        |

| ID                 | Gene Title                                | Chromosomal Location | 1st Gene Ontology Biological Process                                 | Pathway                                    | A2497 30 mins | A2497P' 30 mins | A2497 2 h | A2497P' 2 h | A2497 4 h | A2497P' 4 h | A2497 24 h | A2497P' 24 h | A2497 48 h | A2497P' 48 h | A2497 72 h | A2497P' 72 h |
|--------------------|-------------------------------------------|----------------------|----------------------------------------------------------------------|--------------------------------------------|---------------|-----------------|-----------|-------------|-----------|-------------|------------|--------------|------------|--------------|------------|--------------|
| ITSN1              | intersectin 1 (SH3 domain)                | chr21q22.1-q22.2     | endocytosis                                                          | ---                                        | -1.04         | 1.00            | -1.01     | -1.00       | -1.03     | 1.02        | -1.13      | -1.10        | -1.05      | -1.02        | -1.29      | -1.19        |
| ITSN1              | intersectin 1 (SH3 domain)                | chr21q22.1-q22.2     | endocytosis                                                          | ---                                        | -1.05         | -1.04           | -1.05     | -1.04       | 1.06      | 1.03        | -1.02      | -1.02        | -1.13      | -1.16        | -1.20      | -1.22        |
| IVD                | isovaleryl-CoA dehydrogenase              | chr15q14-q15         | leucine catabolic process                                            | ---                                        | -1.01         | -1.07           | 1.13      | 1.30        | -1.02     | -1.01       | 1.20       | 1.20         | -1.44      | -1.61        | -2.22      | -1.82        |
| IVD                | isovaleryl-CoA dehydrogenase              | chr15q14-q15         | leucine catabolic process                                            | ---                                        | -1.09         | -1.13           | 1.09      | -1.12       | -1.02     | -1.02       | 1.22       | 1.14         | -1.17      | -1.01        | -1.64      | -1.49        |
| IVD                | isovaleryl-CoA dehydrogenase              | chr15q14-q15         | leucine catabolic process                                            | ---                                        | 1.24          | 1.01            | 1.08      | 1.21        | -1.00     | 1.00        | 1.10       | 1.09         | -1.44      | -1.59        | -2.02      | -1.80        |
| IVNS1ABP           | influenza virus NS1A binding protein      | chr1q25.1-q31.1      | transcription from RNA polymerase III promoter                       | ---                                        | 1.02          | 1.07            | 1.08      | 1.05        | 1.03      | 1.02        | 1.16       | 1.13         | -1.35      | -1.11        | -1.27      | -1.15        |
| IVNS1ABP           | influenza virus NS1A binding protein      | chr1q25.1-q31.1      | transcription from RNA polymerase III promoter                       | ---                                        | 1.04          | 1.01            | 1.01      | 1.08        | 1.07      | 1.02        | 1.22       | 1.13         | 1.19       | 1.15         | 1.09       | 1.22         |
| IVNS1ABP           | influenza virus NS1A binding protein      | chr1q25.1-q31.1      | transcription from RNA polymerase III promoter                       | ---                                        | 1.02          | 1.03            | -1.01     | 1.05        | -1.04     | 1.04        | 1.05       | 1.02         | -1.32      | -1.16        | -1.24      | -1.16        |
| IWS1               | IWS1 homolog (S. cerevisiae)              | chr2q14.3            | transcription, DNA-dependent                                         | ---                                        | -1.12         | -1.06           | -1.03     | 1.02        | -1.02     | -1.05       | 1.06       | 1.07         | 1.21       | 1.03         | 1.24       | 1.30         |
| IZUMO1             | izumo sperm-egg fusion 1                  | chr19q13.33          | cell adhesion                                                        | ---                                        | -1.05         | 1.41            | 1.47      | 1.20        | -1.54     | -2.92       | 1.13       | -1.03        | 2.10       | 1.35         | 1.06       | -1.46        |
| JAG1               | jagged 1                                  | chr20p12.1-p11.23    | angiogenesis                                                         | ---                                        | 1.52          | 1.32            | -1.03     | -1.13       | 1.23      | 1.23        | 1.44       | 1.11         | 1.98       | 1.89         | 1.84       | 1.60         |
| JAG1               | jagged 1                                  | chr20p12.1-p11.23    | angiogenesis                                                         | ---                                        | 1.05          | -1.06           | -1.06     | -1.19       | -1.10     | -1.04       | 1.27       | 1.04         | 1.81       | 1.82         | 1.59       | 1.37         |
| JAGN1              | jagged homolog 1 (Drosophila)             | chr3p25.2            | 0                                                                    | ---                                        | -1.10         | -1.12           | -1.04     | -1.03       | 1.11      | -1.01       | -1.00      | -1.06        | -1.14      | -1.17        | -1.36      | -1.20        |
| JAK1               | Janus kinase 1                            | chr1p32.3-p31.3      | protein phosphorylation                                              | TGF_Beta_Signaling_Pathway // GenMAP       | 1.10          | 1.13            | -1.01     | -1.07       | -1.03     | -1.01       | -1.19      | -1.07        | -1.51      | -1.32        | -1.37      | -1.53        |
| JAK3               | Janus kinase 3                            | chr19p13.1           | negative regulation of dendritic cell cytoskeleton                   | ---                                        | 1.50          | 1.52            | -2.00     | -1.01       | 1.43      | -1.32       | -1.25      | 1.40         | 2.64       | 2.65         | 3.16       | 4.65         |
| JAM2               | junctional adhesion molecule 2            | chr21q21.2           | negative regulation of cell adhesion                                 | ---                                        | -1.10         | 1.02            | -1.25     | 1.20        | -1.38     | 1.21        | -1.17      | 1.60         | 1.75       | 1.87         | 3.16       | 3.07         |
| JAM3               | junctional adhesion molecule 3            | chr1q12.5            | angiogenesis                                                         | ---                                        | 1.03          | -1.13           | 1.13      | -1.31       | 1.06      | 1.57        | -1.72      | -1.52        | -1.95      | -2.23        | -3.18      | -2.15        |
| JARID2             | jumonji, AT rich interactive domain       | chr6p24-p23          | negative regulation of transcription from RNA polymerase II promoter | ---                                        | 1.22          | 1.19            | 1.07      | 1.08        | -1.17     | -1.10       | -1.28      | -1.04        | -1.24      | -1.09        | 1.28       | 1.31         |
| JAZF1              | JAZF zinc finger 1                        | chr7p15.2-p15.1      | negative regulation of transcription from RNA polymerase II promoter | ---                                        | 1.18          | 1.04            | -1.11     | 1.06        | -1.03     | -1.13       | 1.26       | 1.11         | 1.28       | 1.32         | 1.56       | 1.21         |
| JAZF1              | JAZF zinc finger 1                        | chr7p15.2-p15.1      | negative regulation of transcription from RNA polymerase II promoter | ---                                        | 1.09          | 1.09            | 1.05      | -1.13       | -1.06     | 1.04        | 1.10       | 1.08         | -1.17      | -1.23        | -1.35      | -1.28        |
| JDP2               | Jun dimerization protein 2                | chr14q24.3           | negative regulation of transcription from RNA polymerase II promoter | ---                                        | -1.18         | -1.10           | 1.09      | -1.20       | 1.46      | 1.52        | 1.03       | 1.20         | -1.20      | -1.07        | -1.07      | -1.01        |
| JHDM1D             | jumonji C domain containing 1             | chr7q34              | transcription, DNA-dependent                                         | ---                                        | 1.51          | 1.59            | 1.20      | -1.34       | -1.29     | -1.00       | 1.22       | 1.04         | 1.45       | 1.63         | 1.91       | 1.82         |
| JHDM1D             | jumonji C domain containing 1             | chr7q34              | transcription, DNA-dependent                                         | ---                                        | -1.07         | -1.07           | -1.08     | -1.06       | 1.15      | 1.21        | 1.20       | -1.06        | 2.17       | 1.75         | 1.30       | 1.20         |
| JMJD1C             | jumonji domain containing 1               | chr10q21.3           | transcription, DNA-dependent                                         | ---                                        | -1.14         | -1.04           | -1.13     | -1.24       | 1.85      | 1.30        | 1.17       | 1.10         | -1.04      | -1.09        | -1.15      | 1.17         |
| JMJD1C-AS1         | JMJD1C antisense RNA 1                    | chr10q21.3           | 0                                                                    | ---                                        | -1.19         | -1.40           | 1.10      | 1.22        | -1.16     | 1.46        | 1.14       | 1.03         | 1.87       | 2.59         | -1.14      | 1.31         |
| JMJD6              | jumonji domain containing 6               | chr17q25             | blood vessel development                                             | ---                                        | 1.02          | -1.08           | -1.02     | -1.02       | -1.09     | -1.07       | 1.03       | 1.08         | 2.11       | 1.85         | 1.98       | 2.26         |
| JMJD6              | jumonji domain containing 6               | chr17q25             | blood vessel development                                             | ---                                        | -1.17         | -1.24           | -1.01     | -1.04       | 1.10      | -1.06       | 1.20       | 1.14         | 2.32       | 1.97         | 2.31       | 2.66         |
| JMJD7 // JMJD7-AS1 | jumonji domain containing 7               | chr15q11.2-q21.3     | lipid metabolic process                                              | ---                                        | -1.11         | -1.02           | 1.13      | 1.28        | -1.03     | -1.14       | 1.48       | 1.42         | -1.22      | -1.75        | -1.84      | -1.34        |
| JMY                | junction mediating and regulating protein | chr5q14.1            | DNA repair                                                           | ---                                        | -1.03         | 1.00            | -1.11     | -1.04       | 1.10      | -1.04       | 1.02       | 1.08         | 1.30       | 1.20         | 1.46       | 1.44         |
| JOSD2              | Josephin domain containing 2              | chr19q13.33          | proteolysis                                                          | ---                                        | 1.08          | -1.03           | -1.01     | -1.08       | -1.12     | -1.19       | 1.00       | -1.23        | -1.26      | -1.36        | -1.85      | -1.82        |
| JPH1               | junctophilin 1                            | chr8q21              | muscle organ development                                             | ---                                        | 1.13          | 1.15            | 1.01      | 1.09        | 1.07      | 1.01        | -1.14      | -1.18        | -1.03      | 1.11         | 1.26       | 1.16         |
| JPH2               | junctophilin 2                            | chr20q13.12          | elevation of cytosolic calcium ion concentration                     | ---                                        | 1.14          | 1.02            | -1.10     | -1.28       | -1.03     | 1.04        | -1.21      | 1.11         | 1.20       | 1.35         | 1.34       | 1.49         |
| JPH3               | junctophilin 3                            | chr16q24.3           | learning                                                             | ---                                        | -1.62         | -1.15           | -1.26     | -1.10       | -1.17     | 1.10        | 1.02       | 1.30         | -1.61      | -1.42        | -1.50      | -1.33        |
| JPX                | JPX transcript, XIST active               | chrXq13.2            | 0                                                                    | ---                                        | 1.07          | 1.02            | 1.16      | 1.10        | 1.19      | 1.11        | 1.30       | 1.40         | -1.40      | -1.62        | -1.37      | -1.28        |
| JRK                | jerky homolog (mouse)                     | chr8q24.3            | 0                                                                    | ---                                        | -1.23         | -1.33           | -1.03     | 1.13        | 1.03      | 1.06        | -1.31      | -1.19        | -1.48      | -1.44        | -2.24      | -1.52        |
| JRK                | jerky homolog (mouse)                     | chr8q24.3            | 0                                                                    | ---                                        | -1.06         | -1.10           | 1.32      | 1.08        | -1.02     | 1.02        | 1.26       | 1.13         | -1.44      | -1.63        | -1.74      | -1.74        |
| JRK                | jerky homolog (mouse)                     | chr8q24.3            | 0                                                                    | ---                                        | -1.21         | -1.32           | 1.10      | -1.01       | 1.06      | -1.06       | 1.08       | 1.06         | -1.67      | -1.67        | -1.70      | -1.85        |
| JRK                | jerky homolog (mouse)                     | chr8q24.3            | 0                                                                    | ---                                        | -1.08         | -1.04           | 1.21      | 1.19        | 1.02      | -1.08       | 1.06       | -1.01        | -1.56      | -1.59        | -1.94      | -1.73        |
| JRK                | jerky homolog (mouse)                     | chr8q24.3            | 0                                                                    | ---                                        | -1.01         | -1.08           | -1.03     | 1.16        | 1.18      | 1.05        | 1.22       | 1.12         | 2.23       | 1.97         | 3.26       | 3.62         |
| JUN                | jun proto-oncogene                        | chr1p32-p31          | angiogenesis                                                         | Apoptosis // GenMAP // Apoptosis_GenMAP    | -1.05         | -1.11           | -1.05     | -1.01       | 1.12      | 1.13        | 1.32       | 1.10         | 2.89       | 3.37         | 3.53       | 2.93         |
| JUN                | jun proto-oncogene                        | chr1p32-p31          | angiogenesis                                                         | Apoptosis // GenMAP // Apoptosis_GenMAP    | -1.05         | -1.13           | -1.02     | 1.10        | 1.10      | 1.09        | 1.67       | 1.24         | 3.43       | 3.31         | 3.82       | 3.48         |
| JUN                | jun proto-oncogene                        | chr1p32-p31          | angiogenesis                                                         | Apoptosis // GenMAP // Apoptosis_GenMAP    | -1.16         | -1.29           | -1.07     | 1.14        | 1.15      | -1.08       | 1.51       | 1.48         | 3.05       | 2.50         | 2.27       | 2.57         |
| JUN                | jun proto-oncogene                        | chr1p32-p31          | angiogenesis                                                         | Apoptosis // GenMAP // Apoptosis_GenMAP    | -1.00         | -1.00           | 1.08      | 1.01        | -1.09     | 1.05        | 1.45       | 1.31         | 3.57       | 3.69         | 4.31       | 3.58         |
| JUNB               | jun B proto-oncogene                      | chr19p13.2           | vasculogenesis                                                       | ---                                        | -1.11         | 1.09            | -1.03     | -1.02       | 1.04      | 1.16        | 1.15       | 1.08         | 1.37       | 1.23         | 1.71       | 1.62         |
| JUND               | jun D proto-oncogene                      | chr19p13.2           | osteoblast development                                               | Hypertrophy_model // GenMAP                | -1.04         | 1.05            | 1.19      | -1.10       | -1.82     | -1.27       | 1.33       | 1.46         | 1.29       | 1.16         | 1.37       | 1.74         |
| JUND               | jun D proto-oncogene                      | chr19p13.2           | osteoblast development                                               | Hypertrophy_model // GenMAP                | 1.14          | 1.09            | -1.27     | 1.01        | -1.47     | -1.09       | -1.12      | 1.03         | -1.05      | 1.05         | 1.06       | 1.10         |
| JUND               | jun D proto-oncogene                      | chr19p13.2           | osteoblast development                                               | Hypertrophy_model // GenMAP                | 1.06          | -1.10           | -1.03     | -1.06       | 1.02      | -1.14       | 1.10       | 1.02         | -1.21      | -1.51        | 1.10       | 1.11         |
| JUP                | junction plakoglobin                      | chr17q21             | negative regulation of transcription from RNA polymerase II promoter | ---                                        | 1.03          | 1.06            | 1.05      | -1.11       | -1.08     | -1.01       | -1.07      | -1.01        | -1.19      | -1.15        | -1.19      | -1.40        |
| JUP // KRT1        | junction plakoglobin // keratin 17        | chr17q21 // chr17q21 | negative regulation of transcription from RNA polymerase II promoter | ---                                        | -1.09         | -1.07           | -1.06     | -1.04       | 1.13      | -1.00       | 1.42       | 1.13         | 2.66       | 1.92         | 3.16       | 3.01         |
| JUP // KRT1        | junction plakoglobin // keratin 17        | chr17q21 // chr17q21 | negative regulation of transcription from RNA polymerase II promoter | ---                                        | 1.00          | -1.03           | -1.01     | 1.05        | 1.11      | 1.07        | 1.44       | 1.14         | 3.04       | 2.37         | 3.61       | 3.40         |
| KAL1               | Kallmann syndrome 1 sequence              | chrXp22.32           | cellular component movement                                          | ---                                        | 1.01          | 1.06            | 1.10      | 1.20        | 1.06      | 1.12        | -1.17      | -1.16        | -1.85      | -1.55        | -1.51      | -1.50        |
| KALRN              | kallirin, RhoGEF kinase                   | chr3q21.2            | protein phosphorylation                                              | ---                                        | -1.14         | -1.00           | 1.06      | 1.02        | -1.02     | -1.19       | -1.84      | 1.01         | -1.79      | -1.61        | -1.71      | -2.02        |
| KALRN              | kallirin, RhoGEF kinase                   | chr3q21.2            | protein phosphorylation                                              | ---                                        | 2.14          | 1.07            | -1.30     | -1.64       | -1.80     | -1.52       | 3.34       | 2.66         | 2.56       | 2.98         | -1.68      | 1.76         |
| KANK1              | KN motif and ankyrin repeat domain        | chr9p24.3            | transcription, DNA-dependent                                         | ---                                        | 1.12          | 1.11            | 1.03      | -1.03       | -1.01     | 1.00        | -1.36      | 1.03         | 1.54       | 1.18         | -1.39      | -1.46        |
| KANK2              | KN motif and ankyrin repeat domain        | chr19p13.2           | negative regulation of transcription from RNA polymerase II promoter | ---                                        | 1.05          | -1.03           | 1.01      | -1.01       | -1.02     | -1.08       | 1.02       | -1.02        | -1.49      | -1.53        | -2.01      | -2.26        |
| KANK3              | KN motif and ankyrin repeat domain        | chr19p13.2           | 0                                                                    | mRNA_processing_binding_Reactome // GenMAP | -1.03         | 1.08            | -1.11     | -1.45       | 1.14      | 1.05        | -1.05      | -1.20        | -2.03      | -1.86        | -2.03      | -1.97        |
| KANSL1             | KAT8 regulatory NSL complex               | chr17q21.31          | chromatin modification                                               | ---                                        | 1.04          | 1.10            | -1.09     | -1.10       | 1.05      | 1.12        | -1.03      | -1.14        | -1.25      | -1.22        | -1.03      | -1.38        |
| KANSL1             | KAT8 regulatory NSL complex               | chr17q21.31          | chromatin modification                                               | ---                                        | 1.14          | -1.30           | -1.09     | -1.24       | 1.01      | 1.09        | -1.02      | 1.13         | -3.02      | -2.56        | -1.24      | -1.66        |
| KANSL1-AS          | KANSL1 antisense RNA 1                    | chr17q21.31          | 0                                                                    | ---                                        | 1.29          | 1.22            | 1.02      | -1.02       | -1.21     | -1.17       | 1.35       | 1.03         | -1.72      | -1.66        | -1.69      | -1.39        |
| KANSL1L            | KAT8 regulatory NSL complex               | chr2q34              | 0                                                                    | ---                                        | 1.05          | 1.17            | -1.12     | -1.03       | 1.28      | 1.22        | -1.10      | -1.11        | -1.73      | -1.64        | -1.98      | -1.80        |
| KANSL1L            | KAT8 regulatory NSL complex               | chr2q34              | 0                                                                    | ---                                        | 1.26          | 1.01            | 1.17      | 1.24        | 1.25      | 1.33        | -1.09      | -1.12        | -2.78      | -2.08        | -2.51      | -2.20        |
| KARS               | lysyl-tRNA synthetase                     | chr16q23.1           | translation                                                          | ---                                        | -1.10         | -1.05           | -1.03     | -1.07       | -1.08     | -1.06       | 1.19       | 1.10         | 1.39       | 1.23         | 1.18       | 1.25         |
| KARS               | lysyl-tRNA synthetase                     | chr16q23.1           | translation                                                          | ---                                        | -1.16         | -1.18           | 1.00      | 1.01        | 1.03      | -1.05       | 1.12       | 1.06         | 1.54       | 1.28         | 1.32       | 1.42         |
| KAT2B              | K(lysine) acetyltransferase               | chr3p24              | chromatin remodeling                                                 | ---                                        | 1.51          | 1.45            | 1.10      | -1.10       | -1.07     | -1.20       | -1.14      | -1.08        | -1.44      | -1.40        | -1.59      | -2.22        |
| KAT5               | K(lysine) acetyltransferase               | chr11q13             | negative regulation of transcription from RNA polymerase II promoter | ---                                        | -1.04         | -1.05           | -1.05     | -1.11       | -1.01     | 1.04        | -1.01      | -1.01        | -1.05      | -1.05        | 1.01       | 1.07         |
| KAT5               | K(lysine) acetyltransferase               | chr11q13             | negative regulation of transcription from RNA polymerase II promoter | ---                                        | 1.02          | -1.04           | -1.12     | -1.15       | 1.10      | 1.03        | 1.13       | -1.07        | 1.05       | -1.07        | 1.10       | 1.16         |

| ID                | Gene Title                                                  | Chromosomal Location | 1st Gene Ontology Biological Process       | Pathway                                      | A2497 30 mins | A2497P' 30 mins | A2497 2 h | A2497P' 2 h | A2497 4 h | A2497P' 4 h | A2497 24 h | A2497P' 24 h | A2497 48 h | A2497P' 48 h | A2497 72 h | A2497P' 72 h |
|-------------------|-------------------------------------------------------------|----------------------|--------------------------------------------|----------------------------------------------|---------------|-----------------|-----------|-------------|-----------|-------------|------------|--------------|------------|--------------|------------|--------------|
| KAT5              | K(lysine) acetyltransferase                                 | chr11q13             | negative regulation of transcription from  | ---                                          | -1.11         | -1.05           | -1.02     | 1.01        | 1.10      | 1.01        | 1.12       | -1.07        | 1.05       | -1.11        | 1.19       | 1.27         |
| KAT6B             | K(lysine) acetyltransferase                                 | chr10q22.2           | nucleosome assembly                        | ---                                          | 1.15          | 1.17            | 1.26      | 1.11        | 1.01      | 1.01        | 1.03       | 1.03         | -1.79      | -1.42        | -1.15      | -1.26        |
| KAT8              | K(lysine) acetyltransferase                                 | chr16p11.2           | transcription, DNA-dependent               | ---                                          | 1.04          | 1.05            | 1.02      | 1.13        | 1.05      | 1.03        | 1.13       | 1.04         | 1.56       | 1.29         | 1.36       | 1.54         |
| KATNA1            | katanin p60 (ATPase containing microtubule bundle formation | chr6q25.1            | microtubule bundle formation               | ---                                          | 1.10          | 1.03            | 1.04      | -1.07       | -1.00     | -1.08       | 1.02       | -1.14        | 1.31       | 1.22         | 1.11       | -1.01        |
| KATNAL1           | katanin p60 subunit A-like                                  | chr13q12.3           | DNA repair                                 | ---                                          | -1.07         | 1.01            | 1.06      | 1.02        | -1.03     | -1.16       | -1.31      | -1.14        | -1.31      | -1.12        | 1.16       | 1.30         |
| KATNAL2           | katanin p60 subunit A-like                                  | chr18q21.1           | DNA repair                                 | ---                                          | -1.28         | 1.02            | -1.12     | -1.22       | -1.68     | -1.31       | -1.76      | -1.35        | -3.36      | -3.26        | -6.40      | -1.63        |
| KATNB1            | katanin p80 (WD repeat containing protein targeting         | chr16q21             | protein targeting                          | ---                                          | 1.05          | 1.11            | 1.10      | 1.15        | 1.04      | -1.17       | 1.10       | 1.13         | 1.17       | 1.12         | -1.43      | -1.57        |
| KATNB1            | katanin p80 (WD repeat containing protein targeting         | chr16q21             | protein targeting                          | ---                                          | 1.09          | -1.17           | 1.41      | 1.85        | -1.09     | -1.56       | 1.19       | 1.35         | 1.18       | -1.04        | -1.55      | -1.26        |
| KATNB1            | katanin p80 subunit B-like                                  | chr15q14             | 0                                          | ---                                          | 1.18          | 1.24            | 1.05      | -1.24       | 1.08      | 1.00        | -1.33      | -1.39        | -1.84      | -1.87        | -1.84      | -2.14        |
| KAZALD1           | Kazal-type serine peptidase                                 | chr10q24.31          | ossification                               | ---                                          | 1.03          | -1.25           | -1.16     | 1.11        | -1.38     | -1.53       | -1.17      | 1.18         | 1.90       | 1.44         | 1.12       | 1.14         |
| KAZALD1           | Kazal-type serine peptidase                                 | chr10q24.31          | ossification                               | ---                                          | 1.15          | 1.17            | -1.11     | 1.22        | 1.25      | -1.13       | -1.00      | 1.09         | 2.23       | 1.42         | 1.52       | 1.67         |
| KB-431C1.4        | NULL // NULL                                                | ---                  | 0                                          | ---                                          | 1.33          | 1.24            | 1.13      | -1.08       | -1.04     | -1.09       | -1.19      | -1.21        | -1.29      | -1.17        | -1.35      | -1.65        |
| KBTBD2            | kelch repeat and BTB (POZ) domain                           | chr7p14.3            | 0                                          | ---                                          | 1.03          | 1.23            | 1.20      | -1.12       | 1.19      | 1.16        | 1.46       | 1.17         | -1.14      | -1.01        | 1.69       | 1.27         |
| KBTBD2            | kelch repeat and BTB (POZ) domain                           | chr7p14.3            | 0                                          | ---                                          | -1.04         | 1.12            | 1.20      | 1.10        | 1.19      | 1.13        | 1.20       | 1.14         | 1.63       | 1.70         | 1.72       | 1.71         |
| KBTBD2            | kelch repeat and BTB (POZ) domain                           | chr7p14.3            | 0                                          | ---                                          | -1.08         | -1.01           | 1.04      | -1.03       | 1.03      | -1.03       | 1.23       | 1.07         | 1.33       | 1.27         | 1.34       | 1.34         |
| KBTBD3            | kelch repeat and BTB (POZ) domain                           | chr11q22.3           | 0                                          | ---                                          | 1.13          | 1.14            | 1.34      | 1.25        | 1.08      | 1.00        | -1.52      | -1.04        | 1.21       | 1.06         | 1.43       | 1.32         |
| KBTBD6            | kelch repeat and BTB (POZ) domain                           | chr13q14.11          | 0                                          | ---                                          | 1.19          | 1.22            | -1.00     | -1.04       | -1.11     | -1.01       | -1.32      | -1.10        | -1.23      | -1.23        | -1.31      | -1.46        |
| KBTBD7            | kelch repeat and BTB (POZ) domain                           | chr13q14.11          | 0                                          | ---                                          | 1.24          | 1.11            | 1.34      | 1.02        | -1.02     | 1.41        | -1.25      | -1.30        | -1.82      | -1.68        | -1.27      | -1.34        |
| KBTBD7            | kelch repeat and BTB (POZ) domain                           | chr13q14.11          | 0                                          | ---                                          | 1.08          | 1.14            | -1.06     | -1.06       | -1.06     | -1.01       | -1.26      | -1.32        | -1.69      | -1.54        | -1.43      | -1.36        |
| KCMF1             | potassium channel modulator                                 | chr2p11.2            | 0                                          | ---                                          | 1.18          | 1.06            | 1.21      | 1.06        | -1.39     | 1.10        | -1.41      | -1.09        | 1.07       | 1.28         | -1.27      | -1.03        |
| KCMF1             | potassium channel modulator                                 | chr2p11.2            | 0                                          | ---                                          | 1.05          | -1.01           | -1.02     | 1.09        | -1.01     | 1.03        | 1.14       | 1.07         | 1.88       | 1.66         | 1.84       | 1.92         |
| KCMF1             | potassium channel modulator                                 | chr2p11.2            | 0                                          | ---                                          | 1.01          | 1.01            | 1.02      | -1.01       | -1.17     | -1.08       | -1.12      | -1.05        | 1.33       | 1.45         | 1.03       | 1.02         |
| KCNA1             | potassium voltage-gated channel                             | chr12p13.32          | transport                                  | ---                                          | -1.15         | -2.01           | 1.38      | -1.43       | -1.23     | -3.38       | 2.00       | 2.02         | -1.07      | -1.54        | -1.13      | 1.83         |
| KCNAB1            | potassium voltage-gated channel                             | chr3q26.1            | transport                                  | ---                                          | -1.11         | -1.65           | -1.16     | -1.24       | -1.00     | 1.39        | -1.52      | -1.09        | -1.34      | -1.22        | -2.72      | -2.06        |
| KCNCA3            | potassium voltage-gated channel                             | chr1p21              | transport                                  | ---                                          | 1.12          | 1.07            | -1.01     | 1.09        | 1.46      | 1.33        | -1.15      | 1.17         | 1.92       | 1.54         | 1.89       | 1.75         |
| KCND3             | potassium voltage-gated channel                             | chr1p13.3            | transport                                  | ---                                          | 1.34          | 1.71            | 3.69      | 7.08        | -1.87     | 1.23        | -2.23      | -1.40        | -1.15      | -1.26        | -1.26      | -1.04        |
| KCNE1             | potassium voltage-gated channel                             | chr21q22.12          | epithelial cell maturation                 | ---                                          | 1.06          | -3.10           | 1.49      | -2.85       | -1.10     | 1.19        | 3.28       | 3.28         | 1.72       | 1.10         | 6.55       | 8.34         |
| KCNE1L            | KCNE1-like                                                  | chrXq22.3            | regulation of heart contraction            | ---                                          | -1.15         | -1.13           | -1.14     | -1.12       | 1.70      | 1.12        | 1.93       | 2.13         | 2.55       | 1.92         | 2.30       | 1.73         |
| KCNE2             | potassium voltage-gated channel                             | chr21q22.12          | transport                                  | ---                                          | 1.09          | 1.09            | 1.14      | 1.12        | -1.18     | -1.01       | -1.08      | -1.18        | -1.45      | -1.66        | -1.11      | -1.29        |
| KCNG1             | potassium voltage-gated channel                             | chr20q13             | transport                                  | ---                                          | 1.09          | 1.20            | -1.05     | 1.02        | 1.15      | 1.10        | 1.29       | 1.55         | 1.14       | -1.12        | -1.74      | -1.46        |
| KCNH5             | potassium voltage-gated channel                             | chr14q23.1           | phosphorelay signal transduction system    | ---                                          | 1.11          | 1.02            | 1.05      | -1.03       | 1.10      | 1.04        | -1.23      | -1.23        | -1.03      | 1.08         | 1.91       | 1.93         |
| KCNH6             | potassium voltage-gated channel                             | chr17q23.3           | regulation of transcription, DNA-dependent | ---                                          | 3.80          | 3.87            | 1.33      | 2.76        | 1.21      | -1.31       | 2.30       | 1.91         | 1.59       | 1.60         | 1.36       | -1.01        |
| KCNH7             | potassium voltage-gated channel                             | chr2q24.2            | regulation of transcription, DNA-dependent | ---                                          | -1.55         | -1.13           | -1.04     | 1.69        | -3.87     | 2.12        | -1.54      | -1.47        | -1.07      | -1.41        | -1.04      | -1.50        |
| KCNIP2            | Kv channel interacting protein                              | chr10q24             | detection of calcium ion                   | ---                                          | -3.19         | -4.43           | -1.03     | 2.30        | 1.01      | -3.81       | 3.07       | 21.63        | 1.98       | 5.26         | 2.87       | 5.48         |
| KCNIP2            | Kv channel interacting protein                              | chr10q24             | detection of calcium ion                   | ---                                          | -1.60         | -2.61           | 1.35      | -1.35       | -2.14     | -1.43       | 1.41       | 1.93         | -1.15      | -1.14        | 2.46       | 2.71         |
| KCNIP2-AS1        | KCNIP2 antisense RNA 1                                      | chr10q24.32          | 0                                          | ---                                          | -1.63         | -1.25           | -1.37     | -1.60       | -2.17     | -1.82       | 1.34       | 1.26         | -1.06      | 1.12         | 1.69       | 1.57         |
| KCNIP4            | Kv channel interacting protein                              | chr4p15.32           | transport                                  | ---                                          | 1.27          | 1.41            | -1.08     | -1.14       | -1.10     | 1.07        | -1.27      | -1.10        | -4.34      | -2.92        | -1.28      | -1.76        |
| KCNJ12 /// KCNJ12 | potassium inwardly-rectifying channel                       | chr17p11.2           | transport                                  | ---                                          | 1.02          | -1.76           | -2.39     | 1.37        | 1.15      | 1.22        | 1.32       | -1.23        | 2.24       | 2.17         | -1.44      | 1.22         |
| KCNJ12 /// KCNJ12 | potassium inwardly-rectifying channel                       | chr17p11.2           | transport                                  | ---                                          | 2.02          | 1.29            | 1.18      | 1.05        | -1.28     | -1.36       | 1.26       | 1.11         | 2.36       | 2.10         | 1.58       | 1.27         |
| KCNJ12 /// KCNJ12 | potassium inwardly-rectifying channel                       | chr17p11.2           | transport                                  | ---                                          | 1.49          | 1.70            | -1.25     | 1.04        | 1.12      | 1.01        | 1.45       | 1.22         | 2.28       | 1.83         | 1.46       | 1.30         |
| KCNJ14            | potassium inwardly-rectifying channel                       | chr19q13             | transport                                  | ---                                          | -1.61         | -1.22           | -1.03     | -1.21       | -1.40     | -1.15       | -1.51      | -1.78        | 1.35       | 1.64         | 2.39       | 2.03         |
| KCNJ15            | potassium inwardly-rectifying channel                       | chr21q22.2           | transport                                  | ---                                          | 1.13          | -1.18           | 1.23      | 1.21        | 1.20      | 1.22        | 2.09       | 1.39         | -1.08      | -1.29        | 1.45       | 1.42         |
| KCNJ2             | potassium inwardly-rectifying channel                       | chr17q24.3           | transport                                  | ---                                          | 1.32          | 1.25            | 1.01      | -1.16       | 1.27      | 1.09        | 1.29       | 1.22         | -1.60      | -2.08        | -2.33      | -3.24        |
| KCNJ3             | potassium inwardly-rectifying channel                       | chr2q24.1            | transport                                  | Calcium_regulation_in_cardiac_cells // Genes | -1.02         | -7.19           | -1.89     | -6.75       | -1.43     | -2.35       | -4.12      | 1.48         | -2.60      | -2.61        | 1.85       | 1.84         |
| KCNK1             | potassium channel, subfamily                                | chr1q42-q43          | potassium ion transport                    | ---                                          | 1.53          | 1.25            | 1.06      | -1.14       | -1.09     | 1.22        | -1.18      | -1.12        | -2.71      | -1.86        | -1.73      | -1.11        |
| KCNK1             | potassium channel, subfamily                                | chr1q42-q43          | transport                                  | ---                                          | 1.13          | 1.14            | 1.01      | -1.02       | -1.23     | -1.04       | -1.10      | -1.10        | 1.04       | 1.09         | 1.66       | 1.27         |
| KCNK1             | potassium channel, subfamily                                | chr1q42-q43          | transport                                  | ---                                          | -1.06         | -1.09           | -1.04     | -1.02       | -1.10     | -1.06       | 1.03       | 1.16         | 1.29       | 1.20         | 1.34       | 1.29         |
| KCNK10            | potassium channel, subfamily                                | chr14q31.3           | transport                                  | ---                                          | -1.76         | 1.06            | -1.74     | -2.52       | 1.93      | 3.79        | -1.77      | -1.88        | 1.08       | -2.41        | -1.12      | 1.29         |
| KCNK3             | potassium channel, subfamily                                | chr2p23              | transport                                  | ---                                          | -1.02         | -1.15           | 1.06      | -1.02       | 1.09      | -1.08       | 1.13       | 1.01         | -1.01      | 1.42         | -1.14      | 1.42         |
| KCNK3             | potassium channel, subfamily                                | chr2p23              | transport                                  | ---                                          | -1.09         | -1.34           | 1.05      | 1.40        | -1.24     | -1.28       | 1.14       | 1.02         | 2.92       | 2.45         | 1.03       | 1.54         |
| KCNK5             | potassium channel, subfamily                                | chr6p21              | transport                                  | ---                                          | -1.15         | -1.13           | 1.05      | 1.04        | -1.03     | 1.07        | -1.26      | 1.02         | -1.01      | 1.21         | 1.36       | 1.31         |
| KCNK6             | potassium channel, subfamily                                | chr19q13.1           | transport                                  | ---                                          | -1.02         | 1.08            | 1.12      | 1.00        | -1.36     | -1.15       | -1.12      | -1.01        | 1.82       | 1.55         | 1.88       | 2.46         |
| KCNMA1            | potassium large conductance channel                         | chr10q22.3           | response to hypoxia                        | ---                                          | -1.54         | 1.17            | -1.34     | 1.09        | 1.19      | -1.21       | -4.42      | 1.41         | 4.09       | 7.23         | -1.62      | 1.31         |
| KCNMB3            | potassium large conductance channel                         | chr3q26.3-q27        | regulation of action potential             | ---                                          | -1.31         | -1.14           | -1.03     | 1.43        | 1.17      | -1.17       | -1.21      | 1.02         | -1.74      | -2.17        | 1.01       | -1.18        |
| KCNMB4            | potassium large conductance channel                         | chr12q               | regulation of action potential             | ---                                          | 1.10          | 1.23            | 1.16      | 1.08        | -1.02     | 1.06        | -1.46      | -1.03        | 1.15       | 1.45         | 1.60       | 2.02         |
| KCNMB4            | potassium large conductance channel                         | chr12q               | regulation of action potential             | ---                                          | 1.14          | -1.04           | 1.07      | 1.05        | 1.15      | -1.05       | 1.18       | 1.13         | 2.26       | 2.53         | 2.36       | 2.79         |
| KCNQ1OT1          | KCNQ1 opposite strand antisense RNA                         | chr11p15             | 0                                          | ---                                          | -1.56         | -1.34           | 1.93      | 5.19        | -5.50     | -1.75       | 1.58       | -1.33        | 2.52       | 9.25         | -1.38      | -1.38        |
| KCNQ1OT1          | KCNQ1 opposite strand antisense RNA                         | chr11p15             | 0                                          | ---                                          | 1.93          | -3.51           | -1.42     | -1.58       | 1.44      | 3.26        | -1.67      | -1.53        | 1.84       | 1.38         | -1.36      | 1.45         |
| KCNQ3             | potassium voltage-gated channel                             | chr2p24              | energy reserve metabolic process           | ---                                          | -1.03         | -1.32           | -1.16     | -1.11       | 1.11      | 1.80        | 1.23       | 1.18         | 1.41       | 1.86         | 2.60       | 2.38         |
| KCNT1             | potassium channel, subfamily                                | chr9q34.3            | transport                                  | ---                                          | -1.09         | 1.31            | -1.45     | -1.38       | 1.12      | -1.74       | -1.66      | -1.49        | 1.29       | 1.72         | -1.54      | -1.76        |
| KCNT2             | potassium channel, subfamily                                | chr1q31.3            | transport                                  | ---                                          | 1.27          | 1.39            | 1.06      | -1.13       | -1.23     | -1.05       | -1.26      | 1.11         | -2.93      | -1.95        | -3.23      | -4.62        |
| KCTD1             | potassium channel tetramer                                  | chr18q11.2           | transcription, DNA-dependent               | ---                                          | -1.14         | -1.11           | -1.02     | 1.03        | -1.24     | 1.04        | -1.31      | -1.09        | -1.55      | -1.34        | -1.12      | -1.26        |
| KCTD10            | potassium channel tetramer                                  | chr12q24.11          | protein ubiquitination                     | ---                                          | 1.18          | 1.14            | -1.05     | 1.00        | -1.13     | -1.02       | -1.04      | 1.05         | 1.17       | 1.06         | 1.39       | 1.57         |
| KCTD10            | potassium channel tetramer                                  | chr12q24.11          | protein ubiquitination                     | ---                                          | -1.03         | -1.09           | 1.01      | 1.05        | 1.05      | 1.07        | -1.11      | -1.00        | 1.20       | 1.24         | 1.06       | 1.11         |
| KCTD11            | potassium channel tetramer                                  | chr17p13.1           | cell cycle                                 | ---                                          | -1.08         | -1.03           | -1.28     | -1.18       | -1.03     | 1.04        | 1.24       | 1.21         | 1.36       | 1.69         | 1.33       | 2.00         |
| KCTD12            | potassium channel tetramer                                  | chr13q22.3           | regulation of G-protein coupled receptor   | ---                                          | 1.16          | 1.21            | 1.01      | 1.02        | 1.05      | 1.08        | -1.28      | -1.22        | -1.27      | -1.15        | -1.38      | -1.43        |

| ID           | Gene Title                      | Chromosomal Location | 1st Gene Ontology Biological Process       | Pathway                             | A2497 30 mins | A2497P' 30 mins | A2497 2 h | A2497P' 2 h | A2497 4 h | A2497P' 4 h | A2497 24 h | A2497P' 24 h | A2497 48 h | A2497P' 48 h | A2497 72 h | A2497P' 72 h |
|--------------|---------------------------------|----------------------|--------------------------------------------|-------------------------------------|---------------|-----------------|-----------|-------------|-----------|-------------|------------|--------------|------------|--------------|------------|--------------|
| KCTD13       | potassium channel tetramer      | chr16p11.2           | DNA replication                            | ---                                 | 1.08          | 1.02            | 1.03      | -1.07       | 1.02      | 1.07        | 1.13       | 1.16         | 1.67       | 1.54         | 1.58       | 1.50         |
| KCTD13       | potassium channel tetramer      | chr16p11.2           | DNA replication                            | ---                                 | -1.00         | -1.09           | 1.25      | 1.09        | 1.04      | 1.03        | -1.06      | 1.13         | 1.52       | 1.25         | 1.64       | 1.58         |
| KCTD14 // N  | potassium channel tetramer      | chr11q14.1           | mitochondrial electron transport, NADH     | Electron_Transport_Chain // GenMAPP | -1.01         | 1.00            | 1.04      | 1.10        | -1.11     | -1.01       | 1.15       | 1.11         | -1.05      | 1.14         | -1.35      | -1.31        |
| KCTD14 // N  | potassium channel tetramer      | chr11q14.1           | mitochondrial electron transport, NADH     | Electron_Transport_Chain // GenMAPP | -1.05         | -1.25           | -1.15     | -1.06       | 1.03      | -1.07       | 1.07       | 1.14         | -1.08      | 1.04         | -1.52      | -1.37        |
| KCTD17       | potassium channel tetramer      | chr22q12.3           | protein homooligomerization                | ---                                 | -1.08         | 1.03            | -1.10     | -1.08       | 1.06      | -1.13       | -1.43      | -1.13        | 1.08       | 1.14         | -1.75      | -2.27        |
| KCTD18       | potassium channel tetramer      | chr2q33.1            | protein homooligomerization                | ---                                 | 1.40          | 1.18            | 1.08      | 1.03        | -1.22     | 1.00        | -1.39      | -1.35        | -1.81      | -1.33        | -1.72      | -1.67        |
| KCTD2        | potassium channel tetramer      | chr17q25.1           | protein homooligomerization                | ---                                 | -1.13         | -1.23           | 1.25      | 1.14        | 1.03      | 1.06        | 1.04       | -1.08        | 1.12       | 1.09         | 1.30       | 1.55         |
| KCTD2        | potassium channel tetramer      | chr17q25.1           | protein homooligomerization                | ---                                 | -1.00         | -1.12           | 1.03      | 1.13        | 1.18      | 1.28        | -1.22      | -1.09        | 1.06       | 1.10         | 1.27       | 1.54         |
| KCTD20       | potassium channel tetramer      | chr6p21.31           | protein homooligomerization                | ---                                 | -1.12         | -1.16           | 1.09      | 1.04        | 1.12      | 1.08        | 1.04       | -1.08        | 1.33       | 1.28         | 1.02       | 1.20         |
| KCTD3        | potassium channel tetramer      | chr1q41              | protein homooligomerization                | ---                                 | 1.16          | 1.16            | -1.08     | -1.03       | -1.14     | 1.05        | -1.02      | -1.07        | -1.95      | -1.36        | -1.85      | -2.15        |
| KCTD6        | potassium channel tetramer      | chr3p14.3            | protein homooligomerization                | ---                                 | 1.08          | 1.09            | 1.08      | 1.04        | -1.01     | -1.01       | 1.00       | -1.22        | -1.04      | -1.23        | -1.26      | ---          |
| KCTD6        | potassium channel tetramer      | chr3p14.3            | protein homooligomerization                | ---                                 | 1.25          | 1.43            | 1.18      | 1.18        | -1.02     | -1.03       | 1.21       | 1.01         | -1.52      | -1.10        | -1.11      | -1.06        |
| KCTD7 /// R  | potassium channel tetramer      | chr7q11.21           | transport                                  | ---                                 | -1.11         | -1.15           | -1.01     | 1.13        | 1.10      | -1.01       | -1.10      | -1.03        | -1.48      | -1.11        | -1.69      | -1.28        |
| KCTD7 /// R  | potassium channel tetramer      | chr7q11.21           | transport                                  | ---                                 | -1.10         | -1.11           | -1.05     | -1.08       | -1.02     | 1.04        | -1.04      | -1.06        | 1.13       | 1.12         | 1.27       | 1.18         |
| KCTD9        | potassium channel tetramer      | chr8p21.1            | intracellular signal transduction          | ---                                 | 1.18          | 1.17            | -1.07     | -1.03       | -1.16     | -1.01       | -1.14      | -1.00        | 1.02       | 1.50         | 1.25       | 1.08         |
| KDEL C2      | KDEL (Lys-Asp-Glu-Leu)          | chr11q22.3           | 0                                          | ---                                 | 1.24          | 1.27            | 1.07      | -1.09       | -1.14     | -1.09       | -1.15      | -1.00        | -1.32      | -1.09        | -1.45      | -1.69        |
| KDEL R1      | KDEL (Lys-Asp-Glu-Leu)          | chr19q13.3           | protein retention in ER lumen              | ---                                 | -1.02         | -1.08           | -1.02     | -1.13       | 1.12      | 1.06        | -1.02      | -1.01        | 1.04       | 1.26         | 1.47       | 1.25         |
| KDEL R1      | KDEL (Lys-Asp-Glu-Leu)          | chr19q13.3           | protein retention in ER lumen              | ---                                 | -1.03         | 1.02            | -1.11     | -1.12       | -1.04     | -1.03       | -1.04      | -1.08        | 1.17       | 1.09         | 1.20       | 1.16         |
| KDEL R2      | KDEL (Lys-Asp-Glu-Leu)          | chr7p22.1            | protein retention in ER lumen              | ---                                 | -1.08         | -1.04           | -1.06     | -1.02       | 1.00      | -1.01       | 1.02       | -1.01        | 1.33       | 1.21         | 1.28       | 1.37         |
| KDEL R2      | KDEL (Lys-Asp-Glu-Leu)          | chr7p22.1            | protein retention in ER lumen              | ---                                 | 1.18          | 1.15            | 1.05      | -1.11       | 1.02      | 1.00        | -1.01      | -1.10        | 1.67       | 1.47         | 2.37       | 2.26         |
| KDEL R2      | KDEL (Lys-Asp-Glu-Leu)          | chr7p22.1            | protein retention in ER lumen              | ---                                 | -1.04         | 1.02            | -1.09     | -1.11       | -1.07     | -1.06       | -1.18      | -1.18        | 1.07       | 1.03         | 1.27       | 1.25         |
| KDEL R3      | KDEL (Lys-Asp-Glu-Leu)          | chr22q13.1           | protein retention in ER lumen              | ---                                 | 1.03          | 1.03            | 1.11      | 1.20        | 1.12      | 1.06        | -1.15      | -1.25        | 2.21       | 2.04         | 3.60       | 3.77         |
| KDEL R3      | KDEL (Lys-Asp-Glu-Leu)          | chr22q13.1           | protein retention in ER lumen              | ---                                 | -1.10         | 1.02            | 1.13      | 1.04        | 1.01      | 1.01        | 1.16       | 1.04         | 2.30       | 2.17         | 3.27       | 3.59         |
| KDEL R3      | KDEL (Lys-Asp-Glu-Leu)          | chr22q13.1           | protein retention in ER lumen              | ---                                 | 1.60          | 1.40            | -1.21     | 1.31        | 1.21      | 1.08        | 1.44       | 1.20         | 3.58       | 3.07         | 3.46       | 3.84         |
| KDM2A        | lysine (K)-specific demethylase | chr11q13.2           | transcription, DNA-dependent               | ---                                 | -1.06         | 1.06            | -1.06     | -1.06       | -1.03     | -1.07       | -1.15      | -1.09        | -1.02      | 1.04         | 1.37       | 1.28         |
| KDM2B        | lysine (K)-specific demethylase | chr12q24.31          | negative regulation of transcription from  | ---                                 | 1.01          | 1.02            | -1.02     | 1.00        | 1.04      | 1.01        | -1.09      | -1.17        | -1.10      | -1.01        | -1.17      | -1.25        |
| KDM3A        | lysine (K)-specific demethylase | chr2p11.2            | transcription, DNA-dependent               | ---                                 | -1.04         | -1.10           | 1.07      | 1.05        | -1.04     | 1.02        | 1.11       | 1.02         | -1.02      | 1.27         | 1.65       | 1.99         |
| KDM3B        | lysine (K)-specific demethylase | chr5q31              | transcription, DNA-dependent               | ---                                 | 1.19          | 1.16            | -1.04     | -1.20       | -1.19     | 1.04        | -1.20      | -1.05        | -1.89      | -1.83        | -2.20      | -3.05        |
| KDM3B        | lysine (K)-specific demethylase | chr5q31              | transcription, DNA-dependent               | ---                                 | 1.22          | 1.31            | 1.05      | -1.17       | -1.17     | 1.02        | -1.11      | -1.07        | -2.06      | -1.97        | -2.02      | -2.72        |
| KDM4A        | lysine (K)-specific demethylase | chr1p34.1            | transcription, DNA-dependent               | ---                                 | 1.07          | 1.00            | 1.01      | -1.09       | 1.05      | -1.08       | -1.13      | -1.06        | -1.48      | -1.52        | -1.31      | -1.21        |
| KDM4B        | lysine (K)-specific demethylase | chr19p13.3           | transcription, DNA-dependent               | ---                                 | -1.06         | -1.00           | 1.01      | 1.06        | 1.02      | -1.05       | 1.11       | 1.08         | 1.06       | 1.27         | 1.09       | 1.48         |
| KDM4B        | lysine (K)-specific demethylase | chr19p13.3           | transcription, DNA-dependent               | ---                                 | 1.03          | -1.01           | 1.05      | 1.19        | -1.08     | -1.00       | 1.07       | 1.16         | 1.03       | 1.21         | -1.03      | 1.43         |
| KDM4B        | lysine (K)-specific demethylase | chr19p13.3           | transcription, DNA-dependent               | ---                                 | -1.06         | 1.00            | 1.02      | 1.11        | -1.06     | 1.08        | 1.09       | -1.19        | 1.11       | 1.02         | 1.35       | ---          |
| KDM4C        | lysine (K)-specific demethylase | chr9p24.1            | transcription, DNA-dependent               | ---                                 | -1.22         | 1.07            | -1.25     | -1.32       | -1.20     | 1.39        | -1.26      | -1.42        | 1.37       | 1.48         | 1.13       | 1.48         |
| KDM5A        | lysine (K)-specific demethylase | chr12p11             | transcription, DNA-dependent               | ---                                 | -1.08         | -1.11           | -1.37     | -1.44       | -1.02     | -1.01       | -1.39      | 1.01         | -1.69      | -1.65        | -2.01      | -1.63        |
| KDM5A        | lysine (K)-specific demethylase | chr12p11             | transcription, DNA-dependent               | ---                                 | -1.16         | -1.12           | 1.24      | -1.03       | 1.10      | 1.05        | -1.23      | -1.04        | -1.77      | -1.77        | -1.50      | -1.71        |
| KDM5A        | lysine (K)-specific demethylase | chr12p11             | transcription, DNA-dependent               | ---                                 | 1.01          | -1.06           | 1.11      | 1.10        | 1.10      | -1.04       | 1.33       | 1.27         | 1.48       | 1.26         | 1.12       | 1.17         |
| KDM5A        | lysine (K)-specific demethylase | chr12p11             | transcription, DNA-dependent               | ---                                 | -1.10         | -1.08           | 1.10      | 1.00        | -1.05     | -1.03       | 1.01       | 1.06         | -2.02      | -1.47        | -1.55      | -1.73        |
| KDM5A        | lysine (K)-specific demethylase | chr12p11             | transcription, DNA-dependent               | ---                                 | 1.15          | 1.07            | 1.23      | 1.19        | -1.06     | 1.17        | -1.34      | -1.23        | -1.52      | -1.26        | -1.27      | -1.40        |
| KDM5C        | lysine (K)-specific demethylase | chrXp11.22-p11.21    | negative regulation of transcription from  | ---                                 | -1.11         | -1.04           | 1.14      | -1.02       | -1.04     | 1.03        | 1.16       | 1.05         | 1.45       | 1.37         | 1.27       | 1.38         |
| KDM6A        | lysine (K)-specific demethylase | chrXp11.2            | in utero embryonic development             | ---                                 | -2.22         | -3.07           | -1.09     | 1.19        | -1.16     | -2.17       | 1.90       | 1.36         | 1.96       | 1.73         | -1.59      | -1.32        |
| KDM6A        | lysine (K)-specific demethylase | chrXp11.2            | in utero embryonic development             | ---                                 | 1.64          | -1.04           | 1.97      | 1.46        | -4.09     | -1.77       | -4.66      | -2.59        | 2.62       | 1.59         | 2.26       | 3.40         |
| KDM6B        | lysine (K)-specific demethylase | chr17p13.1           | negative regulation of transcription from  | ---                                 | -1.15         | -1.08           | 1.07      | 1.02        | 1.06      | -1.03       | 1.13       | 1.08         | 1.47       | 1.34         | 1.92       | 1.69         |
| KDM6B        | lysine (K)-specific demethylase | chr17p13.1           | negative regulation of transcription from  | ---                                 | -1.07         | -1.11           | 1.06      | -1.03       | 1.11      | 1.13        | 1.02       | -1.13        | 1.17       | 1.27         | 1.72       | 1.35         |
| KDM6B        | lysine (K)-specific demethylase | chr17p13.1           | negative regulation of transcription from  | ---                                 | -1.05         | -1.06           | 1.13      | 1.13        | 1.14      | 1.02        | 1.20       | 1.10         | 1.66       | 1.37         | 2.01       | 1.87         |
| KDM8         | lysine (K)-specific demethylase | chr16p12.1           | G2                                         | ---                                 | 1.03          | 1.02            | 1.34      | 1.11        | -1.06     | -1.10       | -1.26      | -1.01        | -1.78      | -1.57        | -1.15      | -1.68        |
| KDSR         | 3-ketodihydroshingosine         | chr18q21.3           | lipid metabolic process                    | ---                                 | 1.02          | -1.01           | 1.07      | -1.04       | -1.21     | 1.00        | -1.30      | -1.16        | -1.59      | -1.34        | -1.48      | -1.29        |
| KDSR         | 3-ketodihydroshingosine         | chr18q21.3           | lipid metabolic process                    | ---                                 | 1.30          | 1.12            | -1.00     | 1.01        | 1.04      | 1.08        | -1.14      | -1.13        | -1.38      | -1.09        | -1.22      | -1.37        |
| KGFLP2       | keratinocyte growth factor      | chr9p12              | fibroblast growth factor receptor signalin | ---                                 | 2.81          | 2.49            | -1.53     | -1.51       | 1.06      | -1.13       | -1.98      | 1.12         | -2.62      | -3.10        | -9.68      | -2.30        |
| KHDRBS1      | KH domain containing, RN        | chr1p32              | G2                                         | ---                                 | -1.04         | -1.01           | 1.08      | 1.02        | 1.08      | 1.05        | -1.14      | -1.12        | -1.33      | -1.27        | -1.38      | -1.47        |
| KHDRBS1      | KH domain containing, RN        | chr1p32              | G2                                         | ---                                 | -1.05         | -1.06           | 1.00      | 1.04        | 1.08      | 1.06        | 1.05       | -1.08        | -1.05      | -1.02        | -1.27      | -1.21        |
| KHDRBS1      | KH domain containing, RN        | chr1p32              | G2                                         | ---                                 | -1.04         | -1.02           | -1.14     | -1.12       | -1.06     | 1.12        | 1.15       | 1.21         | 1.52       | 1.42         | 1.50       | ---          |
| KHDRBS3      | KH domain containing, RN        | chr8q24.2            | transcription, DNA-dependent               | ---                                 | -1.03         | -1.05           | 1.06      | -1.08       | 1.19      | 1.06        | -1.03      | -1.05        | 1.31       | 1.09         | 1.26       | 1.14         |
| KHK          | ketohexokinase (fructokinase)   | chr2p23.3            | carbohydrate metabolic process             | ---                                 | 1.29          | -3.01           | -2.22     | -1.25       | 4.76      | 1.56        | 3.14       | 1.90         | -2.52      | -1.18        | -1.29      | -1.33        |
| KHNYN        | KH and NYN domain contai        | chr14q12             | 0                                          | ---                                 | 1.06          | 1.27            | 1.19      | 1.06        | 1.08      | 1.17        | -1.01      | 1.43         | 1.20       | 1.21         | 1.56       | 1.62         |
| KHSRP        | KH-type splicing regulator      | chr19p13.3           | RNA splicing, via transesterification reac | ---                                 | -1.02         | 1.04            | -1.04     | 1.00        | -1.10     | -1.05       | -1.03      | -1.07        | -1.10      | -1.16        | -1.18      | -1.30        |
| KHSRP        | KH-type splicing regulator      | chr19p13.3           | RNA splicing, via transesterification reac | ---                                 | 1.12          | 1.00            | 1.00      | -1.27       | -1.21     | -1.09       | -1.17      | -1.25        | -1.33      | -1.63        | -1.18      | 1.05         |
| KIAA0020     | KIAA0020                        | chr9p24.2            | 0                                          | ---                                 | -1.04         | -1.06           | 1.07      | -1.02       | -1.03     | -1.02       | 1.11       | 1.09         | 1.22       | 1.19         | 1.46       | 1.43         |
| KIAA0040     | KIAA0040                        | chr1q24-q25          | 0                                          | ---                                 | -1.11         | -1.11           | -1.03     | 1.13        | -1.09     | -1.13       | 1.06       | 1.07         | 1.55       | 1.34         | -1.25      | -1.28        |
| KIAA0040     | KIAA0040                        | chr1q24-q25          | 0                                          | ---                                 | 1.05          | -1.02           | 1.01      | 1.03        | 1.00      | 1.01        | 1.23       | 1.25         | 1.48       | 1.28         | -1.01      | 1.03         |
| KIAA0101     | KIAA0101                        | chr15q22.31          | DNA replication                            | ---                                 | -1.12         | -1.07           | -1.02     | -1.16       | -1.01     | 1.07        | -1.15      | -1.08        | -1.87      | -1.41        | -2.52      | -2.15        |
| KIAA0101     | KIAA0101                        | chr15q22.31          | DNA replication                            | ---                                 | 1.04          | 1.10            | -1.01     | -1.09       | -1.08     | 1.07        | -1.14      | -1.11        | -1.22      | -1.01        | -1.46      | -1.39        |
| KIAA0141     | KIAA0141                        | chr5q31.3            | apoptotic process                          | ---                                 | 1.07          | -1.01           | -1.01     | 1.25        | -1.12     | 1.00        | 1.12       | 1.13         | -1.43      | -1.21        | -2.83      | -2.78        |
| KIAA0146     | KIAA0146                        | chr8q11.21           | 0                                          | ---                                 | -1.09         | -1.12           | 1.04      | -1.01       | 1.11      | 1.08        | -1.04      | -1.27        | 1.83       | 1.75         | 1.28       | 1.32         |
| KIAA0146 /// | KIAA0146 /// uncharacteri       | chr8q11.21           | double-strand break repair via homolog     | ---                                 | 1.27          | 1.30            | 1.12      | 1.04        | 1.02      | 1.06        | 1.41       | 1.14         | 1.84       | 1.86         | 1.88       | 1.59         |
| KIAA0195     | KIAA0195                        | chr17q25.1           | 0                                          | ---                                 | 1.02          | 1.09            | 1.10      | 1.32        | 1.03      | -1.06       | 1.09       | 1.26         | 1.10       | -1.08        | -1.19      | -1.12        |

| ID           | Gene Title                      | Chromosomal Location | 1st Gene Ontology Biological Process      | Pathway | A2497 30 mins | A2497P' 30 mins | A2497 2 h | A2497P' 2 h | A2497 4 h | A2497P' 4 h | A2497 24 h | A2497P' 24 h | A2497 48 h | A2497P' 48 h | A2497 72 h | A2497P' 72 h |
|--------------|---------------------------------|----------------------|-------------------------------------------|---------|---------------|-----------------|-----------|-------------|-----------|-------------|------------|--------------|------------|--------------|------------|--------------|
| KIAA0196     | KIAA0196                        | chr8q24.13           | cell death                                | ---     | 1.23          | 1.10            | 1.06      | 1.03        | 1.15      | 1.21        | -1.04      | -1.10        | -2.25      | -1.80        | -2.35      | -2.42        |
| KIAA0226     | KIAA0226                        | chr3p29              | endocytosis                               | ---     | -1.02         | 1.11            | 1.64      | 1.52        | -1.42     | 1.02        | 1.55       | 1.13         | 2.85       | 1.55         | 1.77       | 1.37         |
| KIAA0232     | KIAA0232                        | chr4p16.1            | 0                                         | ---     | 1.36          | 1.07            | 1.33      | 1.00        | -1.03     | 1.04        | -1.25      | -1.07        | -1.98      | -1.67        | -1.13      | -1.46        |
| KIAA0319     | KIAA0319                        | chr6p22.3-p22.2      | neuron migration                          | ---     | 1.05          | 1.27            | -1.24     | -1.25       | 1.03      | 1.33        | 1.52       | 1.32         | -1.35      | -1.64        | -3.99      | -1.88        |
| KIAA0319L    | KIAA0319-like                   | chr1p34.2            | 0                                         | ---     | -1.06         | -1.12           | 1.13      | 1.21        | 1.19      | 1.09        | 1.18       | 1.17         | -1.05      | -1.09        | 1.27       | 1.46         |
| KIAA0368     | KIAA0368                        | chr9q31.3            | ER-associated protein catabolic process   | ---     | -1.06         | -1.02           | -1.03     | 1.13        | -1.04     | -1.06       | 1.03       | 1.08         | -1.10      | -1.20        | -1.28      | -1.10        |
| KIAA0368     | KIAA0368                        | chr9q31.3            | ER-associated protein catabolic process   | ---     | -1.03         | -1.12           | 1.03      | -1.02       | 1.08      | 1.21        | 1.00       | -1.02        | -1.93      | -1.67        | -1.53      | -1.64        |
| KIAA0391     | KIAA0391                        | chr14q13.2           | rRNA processing                           | ---     | -1.10         | -1.24           | 1.11      | -1.02       | 1.02      | -1.01       | -1.01      | -1.12        | 1.28       | 1.30         | 1.15       | 1.28         |
| KIAA0485     | uncharacterized LOC57235        | ---                  | 0                                         | ---     | 1.34          | 1.10            | -1.04     | -1.20       | 1.22      | 1.25        | -1.28      | -1.38        | -2.32      | -1.95        | -2.60      | -3.32        |
| KIAA0513     | KIAA0513                        | chr16q24.1           | 0                                         | ---     | 1.85          | 1.09            | -1.18     | -1.02       | -1.98     | -1.12       | 1.36       | 1.54         | 2.48       | 2.89         | 1.90       | 1.82         |
| KIAA0586     | KIAA0586                        | chr14q23.1           | smoothened signaling pathway              | ---     | -1.05         | -1.10           | -1.08     | 1.07        | -1.04     | -1.16       | 1.06       | -1.24        | -1.18      | -1.18        | -1.18      | 1.02         |
| KIAA0586     | KIAA0586                        | chr14q23.1           | smoothened signaling pathway              | ---     | -1.10         | -1.19           | -1.05     | 1.03        | -1.11     | -1.06       | 1.05       | -1.07        | -1.33      | -1.24        | -1.03      | 1.08         |
| KIAA0753     | KIAA0753                        | chr17p13.1           | 0                                         | ---     | 1.12          | -1.05           | 1.11      | 1.20        | 1.07      | 1.12        | -1.19      | -1.16        | -1.48      | -1.19        | -1.53      | -1.49        |
| KIAA0754     | KIAA0754                        | chr1p34.3            | 0                                         | ---     | -1.02         | -1.44           | 1.08      | 1.25        | -1.16     | 1.30        | -1.07      | 1.21         | -2.20      | -2.23        | -2.00      | -1.42        |
| KIAA0825     | KIAA0825                        | chr5q15              | 0                                         | ---     | -1.43         | -1.17           | 1.57      | -1.29       | 1.08      | 1.46        | -1.51      | 1.07         | -3.57      | -2.70        | -1.83      | -3.97        |
| KIAA0895L    | KIAA0895-like                   | chr16q22.1           | exocytosis                                | ---     | -1.00         | 1.16            | 1.02      | 1.47        | 1.08      | -1.06       | 1.05       | 1.03         | 1.16       | 1.48         | -1.41      | 1.28         |
| KIAA0907     | KIAA0907                        | chr1q22              | 0                                         | ---     | 1.11          | 1.16            | 1.08      | 1.13        | -1.05     | 1.11        | -1.14      | -1.07        | 1.17       | 1.15         | 1.61       | 1.37         |
| KIAA0907     | KIAA0907                        | chr1q22              | 0                                         | ---     | -1.13         | 1.15            | 1.62      | 1.38        | 1.07      | 1.11        | 1.16       | 1.00         | -1.86      | -1.53        | -1.87      | -1.95        |
| KIAA0922     | KIAA0922                        | chr4q31.3            | 0                                         | ---     | -1.04         | -1.04           | 1.22      | 1.07        | 1.06      | -1.05       | 1.17       | 1.12         | -1.41      | -1.44        | -1.22      | -1.29        |
| KIAA0947     | KIAA0947                        | chr5p15.32           | lipid transport                           | ---     | 1.00          | 1.06            | -1.04     | -1.01       | -1.03     | 1.06        | 1.01       | -1.04        | -1.10      | -1.02        | -1.03      | -1.13        |
| KIAA1009     | KIAA1009                        | chr6q14.3            | cell cycle                                | ---     | 1.54          | 1.44            | 1.28      | 1.07        | -1.23     | -1.08       | -1.09      | 1.09         | -5.24      | -4.33        | -5.26      | -8.53        |
| KIAA1009     | KIAA1009                        | chr6q14.3            | cell cycle                                | ---     | 1.22          | 1.12            | 1.05      | 1.04        | 1.13      | 1.09        | 1.11       | 1.02         | -1.82      | -1.82        | -2.98      | -3.47        |
| KIAA1024     | KIAA1024                        | chr15q25.1           | 0                                         | ---     | 1.24          | 1.13            | 1.22      | 1.02        | 1.18      | 1.22        | -1.02      | -1.03        | -1.51      | -1.97        | -1.10      | -1.37        |
| KIAA1033     | KIAA1033                        | chr12q24.11          | endosomal transport                       | ---     | 1.04          | 1.15            | 1.01      | -1.09       | -1.20     | -1.23       | -1.10      | -1.03        | -2.06      | -1.73        | -1.10      | -1.31        |
| KIAA1033     | KIAA1033                        | chr12q24.11          | endosomal transport                       | ---     | -1.10         | -1.07           | -1.01     | 1.04        | 1.11      | -1.02       | 1.17       | 1.08         | -1.14      | -1.28        | -1.20      | -1.07        |
| KIAA1033     | KIAA1033                        | chr12q24.11          | endosomal transport                       | ---     | -1.04         | -1.06           | 1.06      | -1.02       | 1.02      | -1.00       | -1.22      | -1.16        | -1.54      | -1.20        | -1.22      | -1.23        |
| KIAA1107     | KIAA1107                        | chr1p22.1            | 0                                         | ---     | 1.83          | 1.78            | -1.09     | -2.20       | -1.03     | 1.27        | -1.18      | -1.10        | -2.73      | -3.02        | -1.64      | -1.88        |
| KIAA1107     | KIAA1107                        | chr1p22.1            | 0                                         | ---     | 1.02          | -1.28           | 1.43      | -1.58       | 1.41      | 1.28        | 1.03       | 1.17         | -2.89      | -1.97        | -2.60      | -3.23        |
| KIAA1109     | KIAA1109                        | chr4q27              | regulation of cell growth                 | ---     | 1.18          | 1.13            | -1.02     | 1.09        | -1.23     | -1.06       | -1.31      | -1.06        | -1.52      | -1.38        | -1.61      | -1.77        |
| KIAA1109     | KIAA1109                        | chr4q27              | regulation of cell growth                 | ---     | -1.41         | -1.02           | 1.31      | 1.33        | 1.04      | 1.03        | 1.12       | -1.05        | -2.99      | -2.92        | -3.39      | -3.73        |
| KIAA1143     | KIAA1143                        | chr3p21.31           | 0                                         | ---     | 1.08          | 1.12            | 1.00      | -1.04       | 1.00      | -1.01       | 1.06       | 1.12         | 1.12       | 1.19         | 1.30       | 1.19         |
| KIAA1143     | KIAA1143                        | chr3p21.31           | 0                                         | ---     | 1.12          | 1.10            | -1.05     | -1.10       | -1.06     | 1.05        | -1.18      | -1.10        | -1.78      | -1.52        | -2.19      | -2.08        |
| KIAA1199     | KIAA1199                        | chr15q24             | 0                                         | ---     | 1.26          | 1.38            | 1.73      | 2.57        | -3.27     | -1.31       | -1.75      | -1.70        | 5.54       | 3.69         | 2.97       | 2.47         |
| KIAA1211     | KIAA1211                        | chr4q12              | 0                                         | ---     | 1.25          | 1.23            | -1.01     | 1.25        | -1.05     | 1.15        | -1.08      | 1.38         | -1.33      | -1.20        | -1.93      | -1.98        |
| KIAA1211L    | KIAA1211-like                   | chr2q11.2            | 0                                         | ---     | -1.29         | -1.24           | 1.02      | -1.44       | -1.97     | -1.82       | 1.16       | 1.42         | -1.98      | -1.85        | -2.34      | -3.46        |
| KIAA1217     | KIAA1217                        | chr10p12.31          | multicellular organismal development      | ---     | -1.17         | -1.07           | 1.00      | 1.03        | -1.11     | -1.03       | -1.20      | 1.02         | -2.50      | -2.26        | -3.33      | -2.70        |
| KIAA1217     | KIAA1217                        | chr10p12.31          | embryonic skeletal system development     | ---     | -1.60         | -2.15           | -1.43     | -1.11       | 3.22      | 2.37        | 1.12       | 1.18         | 31.97      | 16.93        | -6.02      | 1.29         |
| KIAA1217     | KIAA1217                        | chr10p12.31          | multicellular organismal development      | ---     | 1.38          | 1.32            | -1.18     | -1.02       | -1.03     | 1.33        | 1.19       | -1.02        | -2.68      | -1.56        | -3.29      | -2.62        |
| KIAA1217     | KIAA1217                        | chr10p12.31          | multicellular organismal development      | ---     | -1.02         | -1.02           | 1.20      | -1.11       | 1.01      | -1.06       | -1.09      | -1.02        | -1.28      | 1.15         | -1.65      | -1.41        |
| KIAA1217     | KIAA1217                        | chr10p12.31          | multicellular organismal development      | ---     | -1.11         | -1.30           | 1.31      | -1.05       | 1.09      | 1.09        | 1.04       | 1.02         | -1.50      | -1.31        | 1.09       | 1.06         |
| KIAA1217     | KIAA1217                        | chr10p12.31          | multicellular organismal development      | ---     | 1.01          | 1.17            | 1.12      | -1.16       | 1.09      | -1.05       | -1.29      | -1.08        | -2.37      | -2.23        | -2.42      | -2.70        |
| KIAA1217     | KIAA1217                        | chr10p12.31          | multicellular organismal development      | ---     | -1.06         | 1.25            | -1.34     | 1.01        | 1.05      | -1.19       | 1.06       | -1.57        | -2.45      | -1.51        | -3.21      | -2.31        |
| KIAA1244     | KIAA1244                        | chr6q23.3            | negative regulation of phosphatase activi | ---     | -1.11         | -1.20           | 1.02      | -1.04       | 1.01      | 1.06        | -1.03      | 1.01         | 1.24       | 1.62         | 1.29       | 1.72         |
| KIAA1244     | KIAA1244                        | chr6q23.3            | negative regulation of phosphatase activi | ---     | 1.09          | -1.04           | -1.08     | -1.24       | 1.45      | 1.40        | -1.23      | -1.05        | -1.05      | 1.23         | 1.28       | 2.09         |
| KIAA1244     | KIAA1244                        | chr6q23.3            | negative regulation of phosphatase activi | ---     | 1.32          | 1.30            | 1.07      | -1.05       | -1.08     | 1.15        | -1.08      | -1.11        | 1.27       | 1.67         | 1.43       | 1.38         |
| KIAA1244     | KIAA1244                        | chr6q23.3            | negative regulation of phosphatase activi | ---     | -1.97         | -1.68           | -2.37     | -6.29       | 5.33      | 9.92        | -2.75      | -3.38        | 1.95       | 1.95         | 1.63       | 1.97         |
| KIAA1257 /// | KIAA1257 ///<br>uncharacterized | chr3q21.3            | 0                                         | ---     | -1.98         | -1.65           | 1.44      | 1.11        | 1.08      | -1.01       | 1.46       | -1.02        | -1.93      | -2.17        | -2.20      | -1.48        |
| KIAA1279     | KIAA1279                        | chr10q22.1           | mitochondrial transport                   | ---     | 1.09          | 1.07            | 1.02      | 1.03        | 1.04      | 1.08        | -1.31      | -1.15        | -1.40      | -1.23        | -1.19      | -1.22        |
| KIAA1324     | KIAA1324                        | chr1p13.3            | autophagy                                 | ---     | -1.15         | -1.06           | -1.03     | -1.04       | 1.06      | 1.02        | -1.17      | -1.23        | -1.07      | 1.47         | 1.07       | -1.43        |
| KIAA1324L    | KIAA1324-like                   | chr7q21.12           | 0                                         | ---     | 1.14          | 1.05            | 1.31      | 1.07        | -1.43     | -1.29       | -1.12      | -1.11        | -1.82      | -1.18        | -1.95      | -2.10        |
| KIAA1324L    | KIAA1324-like                   | chr7q21.12           | 0                                         | ---     | 1.29          | 1.09            | -1.00     | -1.11       | 1.00      | -1.02       | -1.01      | 1.05         | -1.37      | -1.33        | -2.37      | -2.58        |
| KIAA1377     | KIAA1377                        | chr11q22.1           | 0                                         | ---     | -1.03         | 1.41            | 1.54      | 2.02        | 1.08      | 1.13        | 1.18       | 1.09         | -2.19      | -1.39        | -1.84      | -1.58        |
| KIAA1377     | KIAA1377                        | chr11q22.1           | 0                                         | ---     | -1.19         | -1.14           | 1.02      | -1.03       | 1.24      | 1.06        | -1.19      | -1.11        | -2.14      | -1.95        | -2.40      | -1.73        |
| KIAA1377     | KIAA1377                        | chr11q22.1           | 0                                         | ---     | 1.02          | -1.06           | -1.16     | -1.18       | 1.23      | 1.06        | -1.57      | -1.41        | -1.94      | -1.69        | -3.25      | -2.14        |
| KIAA1407     | KIAA1407                        | chr3q13.31           | 0                                         | ---     | 1.33          | 1.23            | -1.28     | -1.06       | -1.07     | 1.06        | -1.13      | -1.05        | -2.75      | -2.39        | -1.80      | -2.09        |
| KIAA1429     | KIAA1429                        | chr8q22.1            | mRNA processing                           | ---     | -1.05         | -1.13           | 1.06      | 1.12        | 1.02      | -1.00       | 1.09       | 1.05         | -1.09      | 1.01         | 1.05       | 1.20         |
| KIAA1429     | KIAA1429                        | chr8q22.1            | mRNA processing                           | ---     | 1.22          | 1.12            | 1.13      | -1.04       | -1.04     | 1.14        | 1.03       | -1.37        | -3.84      | -2.26        | -2.28      | -1.75        |
| KIAA1430     | KIAA1430                        | chr4q35.1            | 0                                         | ---     | 1.09          | 1.06            | -1.10     | -1.10       | -1.02     | 1.14        | -1.23      | -1.06        | -1.28      | 1.00         | -1.15      | -1.55        |
| KIAA1430     | KIAA1430                        | chr4q35.1            | 0                                         | ---     | 1.29          | 1.22            | -1.18     | -1.14       | -1.24     | -1.02       | -1.27      | -1.03        | -1.52      | -1.17        | -1.24      | -1.38        |
| KIAA1430     | KIAA1430                        | chr4q35.1            | 0                                         | ---     | 1.48          | 2.07            | 1.59      | 2.84        | 1.07      | -1.17       | -1.37      | 1.02         | -1.26      | -1.29        | -1.24      | -2.11        |
| KIAA1432     | KIAA1432                        | chr9p24.1            | 0                                         | ---     | 1.28          | 1.02            | 1.34      | 1.64        | -1.20     | -1.75       | -1.00      | 1.18         | 1.41       | 1.12         | 1.04       | -1.19        |
| KIAA1462     | KIAA1462                        | chr10p11.23          | cell adhesion                             | ---     | -2.63         | -1.11           | -3.07     | -1.49       | 3.03      | 1.42        | 1.02       | -2.05        | 3.40       | 1.38         | 1.97       | 2.77         |
| KIAA1467     | KIAA1467                        | chr12p13.1           | 0                                         | ---     | -1.02         | -1.10           | -1.08     | -1.08       | 1.00      | 1.07        | 1.19       | 1.01         | 1.26       | 1.59         | -1.16      | -1.11        |
| KIAA1468     | KIAA1468                        | chr18q21.33          | 0                                         | ---     | 1.17          | 1.20            | 1.15      | -1.01       | -1.19     | 1.00        | -1.06      | -1.11        | -1.37      | -1.39        | -1.34      | -1.74        |
| KIAA1468     | KIAA1468                        | chr18q21.33          | 0                                         | ---     | -1.02         | -1.09           | 1.11      | 1.13        | 1.07      | 1.08        | -1.35      | -1.02        | -1.40      | -1.20        | -1.40      | -1.43        |
| KIAA1524     | KIAA1524                        | chr3q13.13           | 0                                         | ---     | 1.00          | -1.08           | -1.04     | -1.21       | -1.33     | 1.17        | -1.09      | -1.00        | -1.80      | -1.27        | -1.59      | -2.29        |

| ID        | Gene Title                     | Chromosomal Location | 1st Gene Ontology Biological Process              | Pathway                 | A2497 30 mins | A2497P' 30 mins | A2497 2 h | A2497P' 2 h | A2497 4 h | A2497P' 4 h | A2497 24 h | A2497P' 24 h | A2497 48 h | A2497P' 48 h | A2497 72 h | A2497P' 72 h |
|-----------|--------------------------------|----------------------|---------------------------------------------------|-------------------------|---------------|-----------------|-----------|-------------|-----------|-------------|------------|--------------|------------|--------------|------------|--------------|
| KIAA1549  | KIAA1549                       | chr7q34              | activation of MAPKK activity                      | MAPK_Cascade // GenMAPP | 1.00          | -1.20           | 1.16      | -1.09       | 1.05      | 1.04        | -1.12      | -1.07        | -1.58      | -1.63        | -1.52      | -1.50        |
| KIAA1549  | KIAA1549                       | chr7q34              | activation of MAPKK activity                      | MAPK_Cascade // GenMAPP | 1.11          | 1.28            | 1.20      | 1.01        | -1.01     | -1.07       | 1.10       | -1.04        | -1.70      | -1.81        | -1.59      | -1.56        |
| KIAA1549L | KIAA1549-like                  | chr11p13             | 0                                                 | ---                     | 1.16          | 2.02            | 1.14      | -1.59       | -4.93     | -2.38       | 3.45       | 4.37         | 4.00       | 2.96         | 1.14       | 2.15         |
| KIAA1586  | KIAA1586                       | chr6p12.1            | 0                                                 | ---                     | 1.26          | 1.40            | 1.05      | 1.01        | 1.24      | 1.12        | 1.07       | 1.05         | -1.56      | -1.47        | -1.10      | -1.18        |
| KIAA1598  | KIAA1598                       | chr10q25.3           | cytoskeleton organization                         | ---                     | -1.03         | 1.06            | 1.05      | 1.08        | -1.02     | -1.00       | -1.03      | -1.09        | -1.33      | -1.23        | -1.44      | -1.57        |
| KIAA1644  | KIAA1644                       | ---                  | 0                                                 | ---                     | 1.17          | 1.02            | -1.03     | -1.20       | -1.04     | 1.15        | 1.31       | 1.16         | -1.11      | -1.19        | -1.27      | -1.36        |
| KIAA1644  | KIAA1644                       | ---                  | 0                                                 | ---                     | -1.17         | -1.14           | 1.06      | -1.10       | -1.03     | -1.07       | 1.27       | 1.18         | 1.12       | 1.08         | -1.85      | -1.48        |
| KIAA1652  | KIAA1652 protein               | ---                  | 0                                                 | ---                     | -1.05         | -1.13           | 1.07      | -1.04       | 1.31      | 1.22        | 1.17       | 1.07         | 1.42       | 1.44         | -1.19      | -1.18        |
| KIAA1671  | KIAA1671 // uncharacterized    | chr22q11.23          | 0                                                 | ---                     | -1.02         | -1.10           | 1.06      | 1.24        | -1.08     | -1.01       | 1.12       | 1.10         | 1.48       | 1.30         | -1.07      | 1.14         |
| KIAA1704  | KIAA1704 // uncharacterized    | chr13q13-q14         | 0                                                 | ---                     | 1.23          | 1.06            | 1.09      | -1.11       | 1.13      | 1.17        | -1.14      | -1.10        | -1.63      | -1.41        | -1.20      | -1.40        |
| KIAA1704  | KIAA1704 // uncharacterized    | chr13q13-q14         | 0                                                 | ---                     | 1.05          | -1.30           | 1.13      | 1.32        | 1.02      | -1.17       | -1.11      | 1.12         | -1.22      | -1.04        | -1.51      | -1.34        |
| KIAA1704  | KIAA1704 // uncharacterized    | chr13q13-q14         | 0                                                 | ---                     | -1.13         | -1.04           | 1.05      | -1.02       | -1.02     | -1.10       | 1.02       | 1.16         | -1.64      | -1.15        | -1.32      | -1.20        |
| KIAA1715  | KIAA1715                       | chr2q31              | multicellular organismal development              | ---                     | -1.01         | 1.01            | -1.01     | 1.10        | -1.08     | -1.01       | -1.02      | -1.29        | -1.09      | 1.18         | 1.13       | 1.35         |
| KIAA1715  | KIAA1715                       | chr2q31              | multicellular organismal development              | ---                     | 1.27          | -1.21           | 1.17      | 1.20        | -1.30     | -1.01       | 1.02       | -1.22        | -1.31      | -1.09        | -1.88      | -2.60        |
| KIAA1731  | KIAA1731                       | chr11q21             | 0                                                 | ---                     | -1.21         | -1.06           | 1.15      | 1.06        | 1.09      | 1.11        | 1.03       | 1.06         | -1.37      | -1.31        | -1.43      | -1.50        |
| KIAA1737  | KIAA1737                       | chr14q24.3           | 0                                                 | ---                     | 1.47          | 1.50            | 1.13      | -1.05       | 1.02      | 1.05        | -1.05      | -1.18        | -1.56      | -1.54        | -1.64      | -1.88        |
| KIAA1804  | mixed lineage kinase 4         | chr1q42              | activation of MAPKK activity                      | ---                     | 1.01          | 1.06            | 1.04      | 1.09        | -1.07     | 1.05        | -1.24      | -1.12        | -1.20      | -1.01        | -1.11      | -1.25        |
| KIAA1841  | KIAA1841                       | chr2q14              | 0                                                 | ---                     | 1.14          | 1.18            | -1.06     | -1.06       | -1.02     | 1.10        | -1.48      | -1.02        | -2.54      | -1.63        | -2.08      | -2.16        |
| KIAA1919  | KIAA1919                       | chr6q22              | transport                                         | ---                     | -1.11         | 1.06            | 1.08      | -1.09       | -1.24     | -1.20       | 1.02       | 1.05         | 1.26       | 1.38         | 2.14       | 1.70         |
| KIAA1919  | KIAA1919                       | chr6q22              | transport                                         | ---                     | 1.27          | 1.34            | 1.12      | 1.19        | 1.35      | 1.12        | -1.18      | 1.06         | -1.56      | -1.24        | -1.63      | -1.50        |
| KIAA1958  | KIAA1958                       | chr9q32              | 0                                                 | ---                     | 1.20          | 1.30            | 1.26      | 1.15        | -1.06     | -1.11       | 1.17       | 1.19         | -1.09      | -1.04        | -1.24      | -1.15        |
| KIAA1967  | KIAA1967                       | chr8p22              | mRNA processing                                   | ---                     | -1.05         | -1.05           | -1.05     | -1.10       | 1.05      | 1.02        | -1.10      | -1.02        | -1.53      | -1.28        | -1.32      | -1.18        |
| KIAA1984  | KIAA1984                       | chr9q34.3            | 0                                                 | ---                     | 1.09          | -1.21           | -1.11     | 1.06        | 1.33      | 1.16        | 1.54       | 1.23         | 1.44       | 1.12         | 1.94       | 2.15         |
| KIAA2013  | KIAA2013                       | chr1p36.22           | 0                                                 | ---                     | -1.24         | -1.27           | 1.02      | -1.16       | 1.31      | 1.25        | 1.32       | 1.03         | 1.29       | 1.35         | -1.37      | -1.19        |
| KIAA2013  | KIAA2013                       | chr1p36.22           | 0                                                 | ---                     | 1.04          | -1.03           | 1.10      | 1.19        | 1.02      | -1.03       | 1.20       | 1.20         | 1.44       | 1.31         | 1.30       | 1.61         |
| KIAA2013  | KIAA2013                       | chr1p36.22           | 0                                                 | ---                     | 1.09          | -1.00           | 1.03      | -1.02       | 1.06      | 1.14        | 1.01       | -1.01        | 1.19       | 1.27         | 1.37       | 1.27         |
| KIAA2018  | KIAA2018                       | chr3q13.2            | 0                                                 | ---                     | -1.02         | 1.03            | 1.08      | -1.35       | 1.16      | 1.06        | -1.26      | 1.13         | -1.34      | -1.61        | -2.45      | -2.19        |
| KIAA2018  | KIAA2018                       | chr3q13.2            | 0                                                 | ---                     | -1.09         | -1.07           | -1.00     | -1.13       | -1.03     | -1.07       | 1.16       | -2.17        | -1.98      | -1.88        | -1.84      | -1.84        |
| KIAA2026  | KIAA2026                       | chr9q24.1            | 0                                                 | ---                     | 1.95          | 1.61            | -1.01     | 1.40        | -1.18     | -1.01       | 1.35       | 1.98         | 1.09       | -1.04        | 1.23       | 1.50         |
| KIDINS220 | kinase D-interacting substrate | chr2p24              | activation of MAPKK activity                      | ---                     | -1.24         | -1.09           | -1.07     | -1.06       | 1.11      | 1.08        | -1.21      | -1.25        | -1.88      | -1.84        | -1.64      | -1.38        |
| KIDINS220 | kinase D-interacting substrate | chr2p24              | activation of MAPKK activity                      | ---                     | 1.07          | 1.13            | 1.03      | -1.00       | -1.04     | 1.01        | -1.31      | -1.19        | -2.11      | -1.74        | -1.88      | -1.99        |
| KIF11     | kinesin family member 11       | chr10q24.1           | microtubule-based movement                        | ---                     | -1.05         | 1.02            | -1.04     | -1.04       | -1.03     | -1.03       | -1.35      | -1.17        | -1.59      | -1.27        | -1.26      | -1.34        |
| KIF13A    | kinesin family member 13A      | chr6p23              | cytokinesis                                       | ---                     | -1.03         | -1.11           | -1.18     | 1.14        | -1.04     | 1.09        | 1.49       | 1.36         | -1.46      | 1.38         | -2.02      | -1.35        |
| KIF13A    | kinesin family member 13A      | chr6p23              | cytokinesis                                       | ---                     | 1.00          | 1.12            | -1.04     | -1.08       | -1.01     | -1.05       | -1.16      | -1.05        | -1.46      | -1.30        | -1.41      | -1.58        |
| KIF13A    | kinesin family member 13A      | chr6p23              | cytokinesis                                       | ---                     | 1.08          | 1.13            | 1.06      | 1.02        | -1.08     | -1.05       | -1.01      | -1.31        | -1.29      | -1.38        | -1.54      | -1.54        |
| KIF13A    | kinesin family member 13A      | chr6p23              | cytokinesis                                       | ---                     | 1.14          | 1.17            | -1.03     | -1.48       | 1.23      | 1.25        | -1.16      | -1.22        | -3.80      | -2.27        | -1.83      | -2.08        |
| KIF15     | kinesin family member 15       | chr3p21.31           | microtubule-based movement                        | ---                     | 1.00          | 1.11            | 1.00      | 1.02        | 1.08      | 1.02        | 1.03       | 1.07         | -1.68      | -1.58        | -1.03      | -1.12        |
| KIF16B    | kinesin family member 16B      | chr20p11.23          | formation of primary germ layer                   | ---                     | 1.00          | 1.03            | 1.14      | 1.12        | -1.05     | -1.08       | 1.40       | 1.16         | 1.34       | 1.20         | 1.57       | 1.39         |
| KIF17     | kinesin family member 17       | chr1p36.12           | transport                                         | ---                     | 1.83          | 1.38            | -6.86     | 1.21        | 1.48      | -1.11       | -1.12      | 1.30         | -1.72      | 1.04         | 1.12       | 1.35         |
| KIF18A    | kinesin family member 18A      | chr11p14.1           | M phase of mitotic cell cycle                     | ---                     | 1.09          | 1.06            | 1.06      | 1.15        | -1.02     | -1.06       | -1.13      | -1.05        | 1.05       | 1.02         | 1.25       | 1.13         |
| KIF18B    | kinesin family member 18B      | chr17q21.31          | mitotic cell cycle                                | ---                     | 1.06          | 1.09            | -1.04     | 1.04        | -1.08     | 1.06        | -1.16      | -1.14        | 1.06       | 1.21         | 1.06       | 1.04         |
| KIF1B     | kinesin family member 1B       | chr1p36.2            | ATP catabolic process                             | ---                     | 1.13          | -1.00           | -1.01     | 1.05        | -1.03     | -1.04       | -1.29      | -1.10        | -1.91      | -1.57        | -1.31      | -1.35        |
| KIF1B     | kinesin family member 1B       | chr1p36.2            | ATP catabolic process                             | ---                     | -1.09         | 1.01            | 1.05      | -1.12       | 1.10      | 1.01        | -1.13      | -1.15        | -1.85      | -1.60        | -1.28      | -1.33        |
| KIF1C     | kinesin family member 1C       | chr17p13.2           | retrograde vesicle-mediated transport, Golgi      | ---                     | -1.15         | -1.12           | 1.06      | 1.05        | 1.05      | 1.08        | 1.11       | 1.11         | 1.10       | 1.07         | -1.19      | -1.15        |
| KIF1C     | kinesin family member 1C       | chr17p13.2           | retrograde vesicle-mediated transport, Golgi      | ---                     | -1.04         | 1.00            | 1.04      | -1.11       | 1.20      | 1.08        | 1.06       | -1.03        | -1.34      | -1.34        | 1.64       | 1.42         |
| KIF20B    | kinesin family member 20B      | chr10q23.31          | M phase of mitotic cell cycle                     | ---                     | 1.12          | 1.10            | -1.10     | -1.09       | -1.09     | 1.01        | -1.30      | -1.12        | -1.55      | -1.27        | -1.11      | -1.16        |
| KIF21A    | kinesin family member 21A      | chr12q12             | microtubule-based movement                        | ---                     | 1.37          | 1.17            | -1.21     | -1.05       | -1.06     | 1.03        | -1.84      | -1.18        | -1.53      | 1.03         | -1.31      | -1.61        |
| KIF21B    | kinesin family member 21B      | chr1q32.1            | microtubule-based movement                        | ---                     | 1.30          | 1.30            | 1.36      | 1.48        | -1.49     | -1.23       | 2.49       | 2.02         | 7.32       | 6.89         | 2.76       | 2.31         |
| KIF22     | kinesin family member 22       | chr16p11.2           | DNA repair                                        | ---                     | -1.17         | -1.38           | -1.11     | -1.00       | -1.13     | -1.24       | -1.07      | -1.17        | 1.25       | 1.17         | 1.40       | 1.03         |
| KIF23     | kinesin family member 23       | chr15q23             | mitotic spindle elongation                        | ---                     | 1.08          | 1.06            | 1.03      | -1.05       | -1.16     | -1.23       | -1.14      | 1.01         | 1.01       | -1.02        | 1.44       | 1.06         |
| KIF25-AS1 | KIF25 antisense RNA 1          | chr6q27              | 0                                                 | ---                     | 2.68          | 4.22            | -1.47     | 1.30        | -3.20     | -2.03       | -1.36      | -1.24        | 1.56       | 1.77         | -1.20      | -1.50        |
| KIF26A    | kinesin family member 26A      | chr14q32.33          | regulation of cell growth by extracellular matrix | ---                     | -1.01         | -1.05           | -1.04     | -1.00       | -1.02     | 1.01        | 1.05       | 1.06         | -1.29      | -1.21        | -1.54      | -1.31        |
| KIF26A    | kinesin family member 26A      | chr14q32.33          | regulation of cell growth by extracellular matrix | ---                     | -1.10         | 1.14            | 1.28      | 1.06        | -1.20     | -1.38       | 1.11       | 1.26         | -1.17      | -1.24        | -1.41      | -1.14        |
| KIF26B    | kinesin family member 26B      | chr1q44              | microtubule-based movement                        | ---                     | -1.11         | -1.63           | -1.16     | -1.03       | -1.48     | -1.24       | -1.63      | -1.12        | 18.85      | 15.81        | -1.28      | -1.12        |
| KIF2A     | kinesin heavy chain member     | chr5q12-q13          | mitotic cell cycle                                | ---                     | -1.18         | -1.26           | 1.05      | 1.05        | 1.07      | 1.11        | -1.12      | -1.09        | -1.86      | -1.37        | -1.73      | -1.45        |
| KIF2C     | kinesin family member 2C       | chr1p34.1            | M phase of mitotic cell cycle                     | ---                     | -1.04         | -1.15           | 1.04      | -1.03       | 1.19      | 1.02        | -1.06      | -1.11        | 1.71       | 1.60         | 1.92       | 2.05         |
| KIF2C     | kinesin family member 2C       | chr1p34.1            | M phase of mitotic cell cycle                     | ---                     | -1.04         | -1.10           | 1.08      | 1.03        | 1.07      | 1.04        | 1.03       | 1.04         | 1.57       | 1.48         | 1.81       | 1.77         |
| KIF3A     | kinesin family member 3A       | chr5q31              | in utero embryonic development                    | ---                     | 1.22          | 1.19            | -1.04     | -1.05       | -1.15     | 1.04        | -1.55      | -1.27        | -2.06      | -1.90        | -1.47      | -1.78        |
| KIF3C     | kinesin family member 3C       | chr2p23              | microtubule-based movement                        | ---                     | -1.01         | -1.05           | 1.16      | -1.17       | -1.09     | -1.05       | -1.22      | -1.25        | -2.14      | -1.50        | -1.37      | -1.53        |
| KIF6      | kinesin family member 6        | chr6p21.2            | microtubule-based movement                        | ---                     | 1.19          | 1.09            | -1.23     | 1.34        | 1.43      | -2.24       | 1.58       | 3.83         | 2.74       | 3.08         | -3.43      | 1.22         |
| KIF6      | kinesin family member 6        | chr6p21.2            | microtubule-based movement                        | ---                     | 2.50          | 1.49            | 1.49      | 1.42        | -2.68     | -2.06       | -1.20      | -1.59        | 4.79       | 2.19         | 3.62       | 5.71         |
| KIF7      | kinesin family member 7        | chr15q26.1           | microtubule-based movement                        | ---                     | 1.09          | 1.04            | 1.17      | 1.51        | 1.24      | 1.14        | 1.18       | 1.34         | -1.50      | -1.59        | -1.52      | -1.58        |
| KIF9      | kinesin family member 9        | chr3p21.31           | microtubule-based movement                        | ---                     | -1.24         | -1.33           | 1.12      | 1.23        | 1.35      | -1.00       | 1.17       | 1.20         | 1.21       | 1.11         | -1.25      | -1.08        |
| KIF9      | kinesin family member 9        | chr3p21.31           | microtubule-based movement                        | ---                     | -1.05         | -1.08           | 1.00      | 1.05        | 1.03      | -1.02       | 1.11       | 1.20         | 1.09       | 1.02         | -1.23      | -1.16        |
| KIFAP3    | kinesin-associated protein 3   | chr1q24.2            | protein complex assembly                          | ---                     | 1.01          | -1.02           | 1.03      | 1.15        | 1.02      | -1.04       | 1.08       | 1.08         | -1.20      | -1.02        | -1.22      | -1.10        |
| KIFC1     | kinesin family member C1       | chr6p21.3            | mitotic sister chromatid segregation              | ---                     | -1.15         | -1.20           | 1.06      | 1.04        | 1.02      | 1.04        | -1.23      | 1.06         | 1.08       | 1.15         | 1.16       | 1.26         |

| ID          | Gene Title                     | Chromosomal Location | 1st Gene Ontology Biological Process      | Pathway | A2497 30 mins | A2497P' 30 mins | A2497 2 h | A2497P' 2 h | A2497 4 h | A2497P' 4 h | A2497 24 h | A2497P' 24 h | A2497 48 h | A2497P' 48 h | A2497 72 h | A2497P' 72 h |
|-------------|--------------------------------|----------------------|-------------------------------------------|---------|---------------|-----------------|-----------|-------------|-----------|-------------|------------|--------------|------------|--------------|------------|--------------|
| KIFC3       | kinesin family member C3       | chr16q13-q21         | microtubule-based process                 | ---     | -1.14         | -1.18           | -1.05     | 1.08        | -1.20     | -1.15       | 1.57       | 1.28         | 1.72       | 1.52         | 1.76       | 1.68         |
| KIR2DL2     | killer cell immunoglobulin     | chr19q13.4           | regulation of immune response             | ---     | 1.29          | 3.54            | -1.44     | 1.19        | -1.34     | -1.88       | -1.25      | -1.03        | 1.45       | 1.29         | 1.98       | 1.53         |
| KIR2DL2 /// | killer cell immunoglobulin     | chr19p13.3 /// chr19 | immune response                           | ---     | 1.12          | 1.23            | -1.02     | -1.20       | 1.30      | 1.13        | 1.02       | 1.19         | 4.03       | 3.57         | 3.03       | 4.03         |
| KIR2DL2 /// | killer cell immunoglobulin     | chr19p13.3 /// chr19 | immune response                           | ---     | -4.79         | -3.40           | -1.19     | -3.86       | 1.28      | 3.05        | 2.44       | 1.30         | 2.89       | 4.74         | 1.21       | 1.13         |
| KIR2DL2 /// | killer cell immunoglobulin     | chr19p13.3 /// chr19 | immune response                           | ---     | 1.12          | -1.20           | -1.20     | 1.03        | -1.43     | -1.23       | 1.21       | 1.81         | 1.74       | 2.21         | 1.45       | 1.72         |
| KIR2DL3     | killer cell immunoglobulin     | chr19q13.4           | immune response                           | ---     | 1.34          | 1.09            | -1.11     | 1.21        | -1.42     | 1.15        | 1.41       | 1.70         | 1.36       | 1.97         | 1.60       | 1.56         |
| KIR2DL4     | killer cell immunoglobulin     | chr19q13.4           | immune response                           | ---     | 1.01          | 1.35            | -1.83     | -1.32       | -1.43     | -1.13       | -1.82      | 1.06         | 1.44       | 1.31         | 1.91       | 2.26         |
| KIR2DL4     | killer cell immunoglobulin     | chr19q13.4           | immune response                           | ---     | 1.14          | 1.04            | -1.15     | -1.14       | 1.06      | 1.04        | -1.26      | -1.13        | 1.18       | 1.55         | 3.04       | 2.64         |
| KIR2DS1     | killer cell immunoglobulin     | chr19q13.4           | immune response                           | ---     | -1.41         | -1.91           | 1.74      | 1.35        | -1.38     | -1.87       | 1.38       | 1.09         | 2.64       | 2.89         | 2.99       | 3.33         |
| KIR2DS1     | killer cell immunoglobulin     | chr19q13.4           | immune response                           | ---     | -1.05         | -1.48           | 1.38      | 2.05        | 1.48      | 1.11        | -1.05      | -1.00        | 2.49       | 2.33         | -1.06      | 1.32         |
| KIR2DS1 /// | killer cell immunoglobulin     | chr19q13.4           | immune response                           | ---     | -1.28         | 1.01            | 1.39      | -1.03       | -1.43     | -1.05       | 1.11       | -1.14        | 1.80       | 2.32         | 2.22       | 1.45         |
| KIR2DS4     | killer cell immunoglobulin     | chr19q13.4           | innate immune response                    | ---     | -1.92         | -1.25           | 1.51      | 1.35        | 1.27      | -1.11       | 4.13       | 2.26         | -1.27      | -1.05        | 1.97       | 1.84         |
| KIR2DS5     | killer cell immunoglobulin     | chr19q13.4           | immune response                           | ---     | 1.32          | 1.38            | -1.51     | -1.46       | -1.34     | -1.60       | 1.45       | 1.06         | 4.55       | 3.08         | 2.79       | 4.08         |
| KIR3DL1     | killer cell immunoglobulin     | chr19q13.4           | immune response                           | ---     | -3.70         | -1.83           | -1.33     | -1.18       | -1.62     | -1.27       | 15.30      | 10.11        | 2.02       | 1.14         | 1.60       | 1.63         |
| KIR3DL1 /// | killer cell immunoglobulin     | chr19q13.4           | immune response                           | ---     | 1.46          | -1.19           | 1.15      | 2.36        | 1.48      | 1.42        | 1.46       | 1.15         | 1.31       | 1.18         | 1.31       | 1.39         |
| KIR3DL1 /// | killer cell immunoglobulin     | chr19q13.4           | immune response                           | ---     | 2.45          | 1.98            | -1.46     | -1.18       | 1.10      | 1.19        | -1.33      | -2.36        | 1.61       | 1.60         | 2.42       | 2.17         |
| KIR3DL1 /// | killer cell immunoglobulin     | chr19q13.4           | immune response                           | ---     | -1.37         | -1.08           | 1.32      | 1.16        | 1.55      | 1.03        | 1.08       | 1.07         | 1.40       | 1.98         | 2.62       | 2.86         |
| KIR3DL2 /// | killer cell immunoglobulin     | chr19q13.4           | cellular defense response                 | ---     | -1.52         | -1.06           | 1.49      | 1.15        | 4.84      | 3.47        | 1.83       | 3.95         | 4.92       | 1.46         | 1.82       | 1.66         |
| KIR3DL3     | killer cell immunoglobulin     | chr19q13.42          | immune response                           | ---     | 1.34          | 1.02            | -1.42     | -1.14       | -1.16     | -1.02       | -1.58      | -1.52        | 3.25       | 2.19         | 2.04       | 2.33         |
| KISS1R      | KISS1 receptor                 | chr19p13.3           | activation of MAPKK activity              | ---     | -1.19         | -1.27           | -1.25     | -1.09       | 1.10      | -1.10       | 1.32       | 1.23         | 1.44       | 1.37         | 1.72       | 1.95         |
| KIT         | v-kit Hardy-Zuckerman 4        | chr4q11-q12          | activation of MAPK activity               | ---     | 1.53          | 1.63            | 1.22      | 1.34        | 1.52      | 1.74        | -1.07      | -1.08        | -10.61     | -7.43        | -8.13      | -6.93        |
| KITLG       | KIT ligand                     | chr12q22             | neural crest cell migration               | ---     | -1.03         | 1.04            | 1.07      | -1.04       | -1.12     | -1.03       | -1.27      | 1.03         | -1.87      | -1.49        | -1.89      | -2.26        |
| KITLG       | KIT ligand                     | chr12q22             | ovarian follicle development              | ---     | -1.41         | -1.55           | -1.18     | -1.14       | 1.61      | 1.43        | 1.32       | -1.12        | -3.29      | -1.53        | -1.24      | -1.04        |
| KLC1        | kinesin light chain 1          | chr14q32.3           | intracellular protein transport           | ---     | 1.20          | 1.26            | 1.19      | 1.22        | 1.03      | 1.14        | 1.20       | 1.13         | 1.48       | 1.19         | 1.43       | 1.25         |
| KLC1        | kinesin light chain 1          | chr14q32.3           | intracellular protein transport           | ---     | -1.07         | -1.06           | -1.09     | -1.04       | 1.19      | -1.04       | 1.12       | 1.06         | 1.13       | 1.03         | 1.00       | -1.01        |
| KLC3        | kinesin light chain 3          | chr19q13             | axon cargo transport                      | ---     | 2.95          | 3.53            | 1.08      | 1.54        | 1.60      | -1.04       | 2.37       | 3.06         | 3.06       | 1.71         | 3.61       | 2.26         |
| KLC3        | kinesin light chain 3          | chr19q13             | axon cargo transport                      | ---     | 1.01          | -1.64           | -1.34     | 1.23        | -1.29     | -1.29       | 1.43       | 1.17         | 2.35       | 1.45         | 2.75       | 2.75         |
| KLF11       | Kruppel-like factor 11         | chr2p25              | regulation of transcription involved in S | ---     | -1.13         | -1.15           | 1.38      | 1.62        | 1.07      | -1.27       | -1.04      | 1.03         | 2.45       | 1.58         | 1.92       | 1.22         |
| KLF12       | Kruppel-like factor 12         | chr13q22             | negative regulation of transcription from | ---     | -1.38         | -1.69           | 1.22      | 1.14        | 1.04      | 1.29        | 1.17       | 1.48         | -3.51      | -1.67        | -3.20      | -1.99        |
| KLF12       | Kruppel-like factor 12         | chr13q22             | negative regulation of transcription from | ---     | 1.03          | -1.28           | 1.41      | 1.15        | -1.21     | -1.47       | 1.49       | 1.08         | -1.46      | -2.59        | -2.24      | -2.04        |
| KLF12       | Kruppel-like factor 12         | chr13q22             | negative regulation of transcription from | ---     | -1.12         | -1.10           | 1.07      | -1.00       | 1.01      | 1.08        | -1.03      | 1.02         | -1.50      | -1.32        | -1.24      | -1.25        |
| KLF12       | Kruppel-like factor 12         | chr13q22             | negative regulation of transcription from | ---     | -1.09         | -1.10           | -1.10     | -1.06       | 1.10      | 1.10        | -1.00      | 1.02         | -1.52      | -1.79        | -1.95      | -1.82        |
| KLF15       | Kruppel-like factor 15         | chr3q21.3            | transcription, DNA-dependent              | ---     | 1.17          | 1.33            | -1.22     | -2.38       | 1.86      | 2.27        | -1.29      | 1.09         | 1.57       | 1.04         | 1.22       | 1.67         |
| KLF16       | Kruppel-like factor 16         | chr19p13.3           | transcription, DNA-dependent              | ---     | -1.04         | -1.16           | 1.13      | 1.12        | 1.18      | 1.13        | 1.08       | -1.02        | 1.29       | 1.41         | 1.49       | 1.54         |
| KLF16       | Kruppel-like factor 16         | chr19p13.3           | transcription, DNA-dependent              | ---     | -1.71         | -2.10           | -1.37     | -1.80       | 1.23      | 1.35        | 1.22       | 1.17         | 1.42       | 1.80         | -1.38      | -1.05        |
| KLF3        | Kruppel-like factor 3 (basic)  | chr4p14              | transcription, DNA-dependent              | ---     | 1.05          | -1.06           | -1.08     | -1.12       | 1.07      | 1.23        | -1.18      | -1.57        | 1.27       | 1.12         | 2.07       | 1.82         |
| KLF3        | Kruppel-like factor 3 (basic)  | chr4p14              | transcription, DNA-dependent              | ---     | 1.16          | 1.12            | 1.09      | -1.02       | 1.09      | 1.05        | -1.30      | -1.34        | -1.45      | -1.31        | 1.22       | 1.06         |
| KLF3        | Kruppel-like factor 3 (basic)  | chr4p14              | transcription, DNA-dependent              | ---     | 1.05          | 1.12            | -1.18     | -1.19       | 1.25      | 1.15        | 1.03       | -1.40        | 1.09       | 1.13         | 1.20       | 1.66         |
| KLF3        | Kruppel-like factor 3 (basic)  | chr4p14              | transcription, DNA-dependent              | ---     | 1.24          | 1.39            | 1.18      | -1.14       | -1.60     | -1.60       | 1.24       | 1.23         | 1.56       | 1.44         | 2.53       | 2.17         |
| KLF4        | Kruppel-like factor 4 (gut)    | chr9q31              | negative regulation of transcription from | ---     | 1.06          | -1.01           | -1.01     | -1.05       | -1.12     | 1.01        | 1.24       | 1.14         | 1.13       | 1.12         | 1.25       | 1.02         |
| KLF4        | Kruppel-like factor 4 (gut)    | chr9q31              | negative regulation of transcription from | ---     | -1.09         | 1.02            | -1.03     | -1.08       | 1.12      | -1.06       | 1.07       | 1.01         | 1.14       | -1.10        | 1.69       | 1.39         |
| KLF5        | Kruppel-like factor 5 (intest) | chr13q22.1           | angiogenesis                              | ---     | -1.11         | -1.01           | 1.03      | -1.07       | 1.26      | 1.07        | 1.53       | 1.24         | 1.46       | 1.28         | 1.77       | 1.76         |
| KLF6        | Kruppel-like factor 6          | chr10p15             | transcription, DNA-dependent              | ---     | 1.23          | 1.40            | -1.09     | -1.06       | -1.08     | 1.00        | -1.16      | -1.01        | 1.42       | 1.34         | 1.88       | 1.35         |
| KLF6        | Kruppel-like factor 6          | chr10p15             | transcription, DNA-dependent              | ---     | 1.16          | -1.16           | 1.13      | 1.26        | 1.39      | 1.09        | 1.26       | 1.02         | 2.29       | 1.73         | 3.69       | 2.36         |
| KLF6        | Kruppel-like factor 6          | chr10p15             | transcription, DNA-dependent              | ---     | 1.04          | 1.08            | -1.11     | -1.01       | 1.19      | 1.01        | 1.05       | -1.03        | 1.82       | 1.63         | 2.89       | 2.38         |
| KLF6        | Kruppel-like factor 6          | chr10p15             | transcription, DNA-dependent              | ---     | 1.05          | 1.05            | -1.03     | 1.15        | 1.18      | 1.10        | -1.03      | 1.12         | 1.61       | 1.65         | 2.21       | 2.02         |
| KLF7        | Kruppel-like factor 7 (ubiqui) | chr2q32              | transcription, DNA-dependent              | ---     | 1.01          | 1.28            | -1.05     | 1.15        | 1.20      | -1.09       | 1.02       | 2.80         | 2.82       | 1.86         | 2.28       | 2.28         |
| KLF7        | Kruppel-like factor 7 (ubiqui) | chr2q32              | transcription, DNA-dependent              | ---     | 1.02          | 1.04            | 1.04      | -1.10       | 1.09      | 1.01        | -1.16      | -1.09        | -1.02      | 1.16         | 1.56       | 1.63         |
| KLF7        | Kruppel-like factor 7 (ubiqui) | chr2q32              | transcription, DNA-dependent              | ---     | 1.10          | 1.30            | 1.09      | 1.01        | 1.04      | 1.06        | -1.03      | -1.02        | 2.30       | 2.37         | 3.45       | 3.67         |
| KLHDC2      | kelch domain containing 2      | chr14q21.3           | 0                                         | ---     | -1.09         | -1.04           | -1.03     | -1.02       | -1.06     | -1.06       | 1.06       | 1.04         | -1.35      | -1.21        | -1.11      | -1.17        |
| KLHDC4      | kelch domain containing 4      | chr16q24.3           | 0                                         | ---     | -1.03         | -1.22           | 1.00      | 1.27        | 1.56      | 1.43        | 1.22       | 1.04         | -1.71      | -1.45        | -1.08      | 1.09         |
| KLHDC4 ///  | kelch domain containing 4      | chr16q24.2 /// chr16 | 0                                         | ---     | -1.17         | -1.43           | -1.02     | 1.15        | 1.02      | 1.00        | 1.01       | 1.00         | -2.17      | -1.45        | -1.34      | -1.01        |
| KLHDC7A     | kelch domain containing 7A     | chr1p36.13           | 0                                         | ---     | 3.26          | 1.53            | 1.77      | 1.93        | -3.78     | -1.64       | 3.19       | -1.24        | 1.06       | -1.10        | 1.50       | 2.92         |
| KLHDC7B     | kelch domain containing 7B     | chr22q13.33          | 0                                         | ---     | 7.18          | 1.50            | -1.38     | -1.56       | 1.23      | 1.36        | 1.12       | 1.37         | 4.10       | 3.13         | 1.11       | 1.45         |
| KLHDC8B     | kelch domain containing 8B     | chr3p21.31           | 0                                         | ---     | -1.05         | -1.13           | -1.15     | 1.05        | -1.10     | 1.02        | -1.27      | -1.05        | -1.80      | -1.31        | -1.25      | -1.09        |
| KLHDC9      | kelch domain containing 9      | chr1q23.3            | GTP catabolic process                     | ---     | 1.22          | 1.07            | 1.01      | 1.19        | 1.03      | -1.12       | 1.09       | 1.29         | -2.13      | -1.78        | -2.50      | -2.49        |
| KLHL1       | kelch-like family member 1     | chr13q21             | locomotory behavior                       | ---     | 1.16          | 1.08            | -1.13     | -1.15       | -1.01     | 1.12        | -1.25      | -1.26        | -2.51      | -1.84        | -2.86      | -4.14        |
| KLHL11      | kelch-like family member 11    | chr17q21.2           | 0                                         | ---     | -1.29         | 1.00            | 1.67      | 1.70        | 1.19      | 1.55        | 1.26       | -1.11        | 1.29       | 1.37         | 1.24       | 1.46         |
| KLHL12      | kelch-like family member 12    | chr1q32.1            | protein monoubiquitination                | ---     | -1.01         | 1.00            | 1.03      | -1.00       | 1.05      | -1.09       | 1.42       | 1.06         | 1.36       | 1.12         | 1.20       | 1.12         |
| KLHL13      | kelch-like family member 13    | chrXq23-q24          | cytokinesis                               | ---     | 1.18          | 1.21            | -1.08     | -1.10       | 1.16      | 1.12        | -1.04      | -1.12        | -1.06      | 1.11         | -1.12      | -1.24        |
| KLHL15      | kelch-like family member 15    | chrXp22.1-p21        | protein ubiquitination                    | ---     | 1.19          | 1.07            | 1.06      | 1.01        | 1.10      | 1.19        | -1.39      | -1.18        | -1.09      | 1.07         | 1.37       | 1.27         |
| KLHL17      | kelch-like family member 17    | chr1p36.33           | brain development                         | ---     | 1.03          | -1.07           | -1.03     | -1.06       | -1.26     | -1.15       | 1.25       | 1.13         | 1.44       | 1.28         | 1.01       | 1.25         |
| KLHL18      | kelch-like family member 18    | chr3p21.31           | 0                                         | ---     | -1.08         | -1.10           | 1.05      | 1.05        | 1.04      | 1.05        | -1.11      | 1.05         | 1.17       | 1.20         | 1.94       | 1.83         |
| KLHL20      | kelch-like family member 20    | chr1q25.1            | cytoskeleton organization                 | ---     | 1.05          | -1.13           | 1.10      | -1.09       | 1.08      | -1.21       | 1.50       | 1.37         | 2.85       | 2.23         | 2.31       | 2.38         |
| KLHL20      | kelch-like family member 20    | chr1q25.1            | cytoskeleton organization                 | ---     | 1.33          | 1.19            | 1.10      | 1.04        | -1.32     | -1.07       | -1.45      | -1.40        | -1.49      | -1.07        | -1.76      | -1.79        |
| KLHL20      | kelch-like family member 20    | chr1q25.1            | cytoskeleton organization                 | ---     | 1.08          | 1.08            | 1.87      | 2.34        | -1.22     | 1.21        | -1.00      | 1.29         | 3.86       | 2.09         | 4.59       | 4.41         |

| ID              | Gene Title                                 | Chromosomal Location | 1st Gene Ontology Biological Process                   | Pathway                                 | A2497 30 mins | A2497P' 30 mins | A2497 2 h | A2497P' 2 h | A2497 4 h | A2497P' 4 h | A2497 24 h | A2497P' 24 h | A2497 48 h | A2497P' 48 h | A2497 72 h | A2497P' 72 h |
|-----------------|--------------------------------------------|----------------------|--------------------------------------------------------|-----------------------------------------|---------------|-----------------|-----------|-------------|-----------|-------------|------------|--------------|------------|--------------|------------|--------------|
| KLHL21          | kelch-like family member 2                 | chr1p36.31           | cytokinesis                                            | ---                                     | -1.26         | -1.18           | -1.12     | -1.21       | -1.06     | -1.08       | -1.03      | 1.28         | -1.42      | -1.33        | -1.24      | -1.17        |
| KLHL22          | kelch-like family member 2                 | chr22q11.21          | mitotic sister chromatid segregation                   | ---                                     | -1.17         | -1.03           | 1.77      | 1.45        | 1.76      | 2.21        | -1.25      | -1.00        | -1.86      | -2.13        | -2.96      | -1.43        |
| KLHL23 // P     | kelch-like family member 2                 | chr2p // chr2q31.1   | 0                                                      | ---                                     | 1.16          | 1.11            | 1.14      | -1.06       | -1.06     | 1.04        | -1.14      | 1.07         | -1.74      | -1.46        | -1.59      | -1.81        |
| KLHL24          | kelch-like family member 2                 | chr3q27.1            | 0                                                      | ---                                     | -1.36         | -1.36           | 1.10      | 1.06        | -1.05     | -1.06       | 1.39       | 1.21         | -1.17      | -1.17        | 1.81       | 1.61         |
| KLHL24          | kelch-like family member 2                 | chr3q27.1            | 0                                                      | ---                                     | -1.11         | -1.27           | 1.17      | 1.10        | -1.15     | 1.04        | 1.29       | 1.11         | -1.16      | -1.15        | 1.37       | 1.25         |
| KLHL28          | kelch-like family member 2                 | chr14q21.2           | 0                                                      | ---                                     | -1.03         | 1.22            | 1.03      | -1.02       | 1.18      | -1.03       | 1.10       | 1.13         | 1.07       | 1.06         | 1.41       | 1.48         |
| KLHL29          | kelch-like family member 2                 | chr2p24.1            | 0                                                      | ---                                     | 12.20         | 8.43            | 1.53      | 1.24        | -2.02     | -1.41       | -1.33      | 1.15         | 4.26       | 2.77         | 1.64       | 1.90         |
| KLHL3           | kelch-like family member 3                 | chr5q31              | protein ubiquitination                                 | ---                                     | -1.08         | -1.17           | 1.18      | -1.03       | -1.11     | 1.10        | -1.39      | -1.22        | -2.59      | -1.49        | -1.76      | -1.92        |
| KLHL36          | kelch-like family member 3                 | chr16q24.1           | protein ubiquitination                                 | ---                                     | -1.00         | -1.18           | -1.18     | -1.06       | 1.08      | -1.05       | 1.63       | 1.04         | 1.97       | 1.70         | 1.98       | 1.95         |
| KLHL36          | kelch-like family member 3                 | chr16q24.1           | protein ubiquitination                                 | ---                                     | -1.09         | 1.04            | -1.08     | -1.23       | 1.24      | -1.03       | -1.51      | 1.04         | 1.26       | 1.27         | 1.33       | 1.45         |
| KLHL42          | kelch-like family member 4                 | chr12p11.22          | protein polyubiquitination                             | ---                                     | 1.07          | 1.16            | -1.03     | -1.12       | -1.03     | 1.13        | -1.08      | 1.08         | -2.24      | -2.01        | -2.96      | -3.37        |
| KLHL42          | kelch-like family member 4                 | chr12p11.22          | protein polyubiquitination                             | ---                                     | -1.00         | -1.03           | -1.08     | -1.16       | 1.02      | 1.15        | -1.25      | 1.01         | -2.24      | -1.66        | -2.41      | -2.54        |
| KLHL5           | kelch-like family member 5                 | chr4p14              | 0                                                      | ---                                     | -1.01         | 1.01            | 1.01      | -1.06       | -1.16     | 1.06        | 1.06       | 1.10         | -1.09      | 1.05         | -1.28      | -1.47        |
| KLHL5           | kelch-like family member 5                 | chr4p14              | 0                                                      | ---                                     | -1.13         | -1.07           | 1.15      | 1.08        | -1.01     | -1.04       | -1.14      | -1.18        | -2.17      | -1.97        | -2.77      | -2.83        |
| KLHL5           | kelch-like family member 5                 | chr4p14              | 0                                                      | ---                                     | -1.02         | -1.02           | 1.01      | 1.15        | 1.01      | 1.14        | -1.16      | 1.06         | -1.80      | -1.55        | -3.82      | -3.02        |
| KLHL6           | kelch-like family member 6                 | chr3q27.3            | germinal center formation                              | ---                                     | -2.35         | -1.76           | -2.31     | -2.39       | -1.23     | 1.36        | 2.67       | 2.84         | 1.33       | 1.32         | 2.07       | 2.72         |
| KLHL7           | kelch-like family member 7                 | chr7p15.3            | protein ubiquitination                                 | ---                                     | 1.04          | -1.01           | -1.05     | -1.17       | -1.11     | -1.06       | 1.01       | 1.05         | 1.45       | 1.59         | 1.82       | 1.65         |
| KLHL7           | kelch-like family member 7                 | chr7p15.3            | protein ubiquitination                                 | ---                                     | -1.07         | -1.05           | 1.02      | -1.12       | 1.11      | 1.12        | -1.07      | -1.10        | -1.44      | -1.23        | -1.17      | -1.27        |
| KLHL7           | kelch-like family member 7                 | chr7p15.3            | protein ubiquitination                                 | ---                                     | 1.02          | -1.02           | 1.13      | -1.24       | -1.16     | 1.03        | -1.24      | -1.07        | 1.10       | 1.43         | 1.54       | 1.45         |
| KLHL9           | kelch-like family member 9                 | chr9q22              | cytokinesis                                            | ---                                     | 1.10          | 1.10            | 1.03      | 1.09        | -1.02     | 1.04        | -1.24      | -1.19        | -1.43      | -1.23        | -1.20      | -1.31        |
| KLK15           | kallikrein-related peptidase 15            | chr19q13.41          | proteolysis                                            | ---                                     | -1.20         | -1.08           | -2.64     | 1.79        | -2.40     | -1.24       | -2.77      | -3.09        | 2.83       | 1.12         | 1.29       | 1.67         |
| KLK7            | kallikrein-related peptidase 7             | chr19q13.41          | proteolysis                                            | ---                                     | -4.48         | -2.49           | 1.51      | -2.50       | -1.14     | -1.56       | -2.83      | 1.16         | -1.60      | -1.55        | -1.51      | -1.13        |
| KLRC1 // KLRC4  | killer cell lectin-like receptor 1         | chr1p13              | cellular defense response                              | ---                                     | -1.02         | 1.01            | 1.09      | 1.14        | 1.12      | 1.01        | 1.29       | 1.13         | -1.33      | -1.38        | -1.53      | -1.65        |
| KLRC3           | killer cell lectin-like receptor 3         | chr12p13             | cellular defense response                              | ---                                     | 1.14          | 1.16            | -1.01     | -1.23       | 1.00      | 1.05        | 1.26       | -1.02        | -1.15      | -1.33        | -1.24      | -1.67        |
| KLRC4-KLR       | KLRC4-KLRK1 readthrough                    | chr12p // chr12p13   | stimulatory C-type lectin receptor signal transduction | ---                                     | 1.49          | 1.18            | 1.34      | 1.16        | 1.33      | 1.54        | -1.27      | -1.08        | -2.62      | -2.28        | -4.20      | -3.24        |
| KLRC4-KLR       | KLRC4-KLRK1 readthrough                    | chr12p // chr12p13   | stimulatory C-type lectin receptor signal transduction | ---                                     | -1.03         | 1.17            | 1.11      | 1.01        | 1.27      | 1.14        | -1.03      | 1.09         | -3.06      | -2.84        | -3.88      | -4.95        |
| KLRG1           | killer cell lectin-like receptor 1         | chr12p13.31          | inflammatory response                                  | ---                                     | -2.37         | -3.34           | 1.17      | -2.20       | -2.58     | -2.41       | 1.46       | -1.32        | -5.28      | 1.42         | 1.58       | 2.06         |
| KMT2A           | lysine (K)-specific methyltransferase 2A   | chr11q23             | DNA methylation                                        | ---                                     | -1.03         | -1.06           | 1.07      | 1.04        | 1.11      | -1.01       | -1.03      | 1.02         | -1.41      | -1.29        | -1.20      | -1.00        |
| KMT2A           | lysine (K)-specific methyltransferase 2A   | chr11q23             | DNA methylation                                        | ---                                     | 1.04          | 1.06            | -1.01     | -1.11       | -1.02     | 1.07        | -1.10      | 1.01         | -1.83      | -1.46        | -1.22      | -1.49        |
| KMT2B           | lysine (K)-specific methyltransferase 2B   | chr19q13.1           | ovarian follicle development                           | ---                                     | -1.08         | -1.04           | 1.21      | 1.33        | 1.21      | 1.15        | 1.52       | 1.34         | 1.52       | 1.30         | 1.37       | 1.59         |
| KMT2C           | lysine (K)-specific methyltransferase 2C   | chr7q36.1            | transcription, DNA-dependent                           | ---                                     | 1.15          | 1.09            | 1.03      | 1.01        | -1.07     | 1.00        | -1.08      | -1.06        | -1.40      | -1.27        | -1.39      | -1.41        |
| KMT2C           | lysine (K)-specific methyltransferase 2C   | chr7q36.1            | transcription, DNA-dependent                           | ---                                     | -1.00         | -1.05           | 1.08      | -1.05       | 1.21      | -1.04       | -1.25      | -1.27        | -1.73      | -1.37        | -1.02      | -1.06        |
| KMT2D           | lysine (K)-specific methyltransferase 2D   | chr12q13.12          | oocyte growth                                          | ---                                     | -1.06         | -1.02           | 1.02      | -1.09       | -1.02     | 1.01        | -1.07      | -1.17        | -1.06      | -1.05        | 1.02       | 1.02         |
| KMT2E           | lysine (K)-specific methyltransferase 2E   | chr7q22.1            | neutrophil mediated immunity                           | ---                                     | -1.16         | -1.06           | 1.04      | 1.04        | 1.09      | 1.08        | 1.06       | 1.14         | -1.14      | -1.23        | -1.24      | -1.10        |
| KMT2E           | lysine (K)-specific methyltransferase 2E   | chr7q22.1            | neutrophil mediated immunity                           | ---                                     | 1.05          | 1.03            | 1.23      | 1.09        | 1.07      | -1.05       | -1.12      | -1.41        | -1.17      | -1.44        | -1.32      | -1.32        |
| KMT2E           | lysine (K)-specific methyltransferase 2E   | chr7q22.1            | neutrophil mediated immunity                           | ---                                     | 1.27          | 1.06            | 1.04      | 1.16        | -1.16     | 1.04        | -1.43      | -1.30        | -1.71      | -1.31        | -1.34      | -1.49        |
| KNK1            | kininogen 1                                | chr3q27              | platelet degranulation                                 | ACE-Inhibitor_pathway_PharmGKB // Genet | -1.46         | -2.97           | 4.86      | 3.92        | -1.11     | -1.49       | -3.08      | -1.50        | 8.85       | 2.80         | 2.51       | 5.10         |
| KNSTRN          | kinetochore-localized astrin               | chr15q15.1           | mitotic sister chromatid segregation                   | ---                                     | -1.02         | 1.02            | 1.03      | -1.03       | -1.02     | -1.01       | -1.07      | -1.06        | 1.46       | 1.29         | 1.50       | 1.36         |
| KNTC1           | kinetochore associated 1                   | chr12q24.31          | M phase of mitotic cell cycle                          | ---                                     | -1.03         | 1.01            | 1.03      | 1.04        | 1.03      | -1.05       | 1.02       | -1.08        | -1.76      | -1.64        | -1.60      | -1.46        |
| KPNA1           | karyopherin alpha 1 (importin alpha 1)     | chr3q21              | regulation of DNA recombination                        | ---                                     | -1.24         | -1.26           | 1.08      | 1.09        | 1.15      | 1.09        | -1.22      | 1.07         | 1.14       | 1.16         | 1.41       | 1.41         |
| KPNA1           | karyopherin alpha 1 (importin alpha 1)     | chr3q21              | regulation of DNA recombination                        | ---                                     | 1.04          | -1.04           | 1.04      | 1.09        | 1.04      | 1.12        | -1.11      | -1.02        | 1.08       | 1.22         | 1.47       | 1.47         |
| KPNA1           | karyopherin alpha 1 (importin alpha 1)     | chr3q21              | regulation of DNA recombination                        | ---                                     | 1.01          | -1.07           | 1.20      | 1.04        | -1.02     | 1.04        | -1.08      | -1.11        | 1.26       | 1.25         | 1.23       | 1.29         |
| KPNA1           | karyopherin alpha 1 (importin alpha 1)     | chr3q21              | regulation of DNA recombination                        | ---                                     | 1.09          | -1.02           | -1.22     | -1.05       | -1.00     | -1.05       | -1.10      | 1.12         | 1.19       | 1.34         | 1.31       | 1.43         |
| KPNA2           | karyopherin alpha 2 (RAG)                  | chr17q24.2           | regulation of DNA recombination                        | ---                                     | -1.03         | 1.04            | 1.02      | -1.05       | 1.03      | -1.04       | -1.14      | -1.17        | 1.19       | 1.07         | 1.37       | 1.30         |
| KPNA4           | karyopherin alpha 4 (importin alpha 4)     | chr3q25.33           | protein import into nucleus                            | ---                                     | -1.14         | -1.14           | 1.03      | 1.15        | 1.13      | 1.10        | 1.11       | 1.11         | 1.95       | 1.91         | 3.16       | 2.75         |
| KPNA4           | karyopherin alpha 4 (importin alpha 4)     | chr3q25.33           | protein import into nucleus                            | ---                                     | 1.03          | 1.18            | 1.08      | 1.07        | -1.16     | -1.01       | -1.24      | -1.25        | 1.14       | 1.22         | 1.23       | 1.09         |
| KPNB1           | karyopherin (importin) beta                | chr17q21.32          | protein import into nucleus, translocation             | ---                                     | -1.02         | -1.03           | -1.03     | 1.08        | 1.05      | 1.00        | 1.10       | 1.07         | 1.33       | 1.20         | 1.11       | 1.16         |
| KRAS            | v-Ki-ras2 Kirsten rat sarcoma              | chr12p12.1           | MAPK cascade                                           | G_Protein_Signaling // GenMAPP // MAPK  | 1.44          | -1.78           | -1.51     | -1.50       | 1.18      | -1.14       | 1.67       | 2.19         | 1.18       | -1.71        | 1.54       | -1.32        |
| KRAS            | v-Ki-ras2 Kirsten rat sarcoma              | chr12p12.1           | MAPK cascade                                           | G_Protein_Signaling // GenMAPP // MAPK  | -1.18         | -1.06           | 1.25      | 1.08        | 1.08      | 1.10        | 1.09       | 1.28         | -1.10      | 1.09         | 1.46       | 1.16         |
| KRAS            | v-Ki-ras2 Kirsten rat sarcoma              | chr12p12.1           | MAPK cascade                                           | G_Protein_Signaling // GenMAPP // MAPK  | 1.09          | -1.14           | -1.12     | -1.22       | -1.11     | 1.08        | -1.72      | 1.00         | -1.99      | -1.39        | -2.05      | -2.10        |
| KRBOX4          | KRAB box domain containing 4               | chrXp11.3            | regulation of transcription, DNA-dependent             | ---                                     | 1.03          | 1.01            | -1.01     | 1.10        | 1.14      | -1.02       | 1.13       | 1.25         | -1.23      | -1.11        | -1.66      | -1.53        |
| KRBOX4 // Z     | KRAB box domain containing 4               | chrXp11.3            | transcription, DNA-dependent                           | ---                                     | -1.02         | -1.11           | -1.01     | -1.03       | 1.04      | -1.02       | 1.39       | 1.09         | 1.14       | 1.10         | -1.03      | 1.23         |
| RCC1            | lysine-rich coiled-coil 1                  | chr2p11.2            | 0                                                      | ---                                     | 1.04          | 1.05            | -1.12     | -1.23       | -1.04     | -1.24       | -1.55      | 1.05         | -2.36      | -2.28        | -2.37      | -1.94        |
| RCC1            | lysine-rich coiled-coil 1                  | chr2p11.2            | 0                                                      | ---                                     | 1.14          | 1.20            | -1.03     | -1.19       | -1.03     | -1.09       | -1.29      | 1.01         | -2.20      | -2.26        | -2.02      | -1.84        |
| RCC1            | lysine-rich coiled-coil 1                  | chr2p11.2            | 0                                                      | ---                                     | -1.02         | 1.08            | 1.02      | -1.23       | 1.11      | 1.02        | -1.28      | -1.08        | -2.13      | -2.08        | -1.70      | -1.85        |
| KREMEN2         | kringle containing transmembrane protein 2 | chr16p13.3           | Wnt receptor signaling pathway                         | ---                                     | 1.26          | 1.40            | -1.07     | -1.03       | 1.27      | 1.03        | -1.07      | -1.17        | 1.27       | 1.39         | 1.31       | 1.66         |
| KRIT1           | KRIT1, ankyrin repeat containing protein 1 | chr21q21.2           | angiogenesis                                           | ---                                     | -1.00         | -1.00           | 1.19      | 1.09        | 1.02      | -1.10       | -1.22      | -1.18        | -2.62      | -2.57        | -1.49      | -1.58        |
| KRR1            | KRR1, small subunit (SSU)                  | chr12q21.2           | rRNA processing                                        | ---                                     | 1.02          | -1.00           | 1.10      | 1.15        | 1.06      | 1.09        | 1.18       | 1.03         | 1.18       | 1.14         | 1.27       | 1.18         |
| KRT10           | keratin 10                                 | chr17q21             | keratinocyte differentiation                           | ---                                     | 1.04          | -1.04           | -1.18     | 1.00        | -1.37     | -1.18       | -1.55      | -1.21        | 1.24       | 1.29         | 1.18       | 1.10         |
| KRT14           | keratin 14                                 | chr17q12-q21         | epidermis development                                  | ---                                     | 1.16          | -1.22           | 1.50      | -1.04       | 1.38      | 1.09        | -3.83      | -2.00        | 5.96       | 3.89         | 9.95       | 13.99        |
| KRT16           | keratin 16                                 | chr17q21.2           | cytoskeleton organization                              | ---                                     | 1.16          | -1.08           | 1.06      | -1.07       | -1.08     | 1.15        | -1.07      | -2.12        | 6.43       | 4.73         | 5.32       | 4.40         |
| KRT18           | keratin 18                                 | chr12q13             | apoptotic process                                      | ---                                     | -1.09         | -1.03           | -1.01     | -1.01       | 1.10      | -1.01       | 1.19       | 1.09         | 1.17       | -1.06        | -1.21      | -1.13        |
| KRT18P38 // LOC | keratin 18 pseudogene 38                   | ---                  | 0                                                      | ---                                     | -1.13         | -1.69           | -1.87     | 1.02        | 3.14      | 2.46        | -7.86      | -2.56        | -4.47      | -1.42        | -1.17      | 1.47         |
| KRT34 // LOC    | keratin 34                                 | chr17q21.2           | epidermis development                                  | ---                                     | -1.86         | -1.30           | -1.62     | -1.16       | 1.00      | 2.46        | 3.36       | 2.53         | 7.24       | 5.04         | 7.96       | 3.97         |
| KRT6A           | keratin 6A                                 | chr12q13.13          | ectoderm development                                   | ---                                     | -1.02         | 3.65            | -1.61     | 1.71        | -8.55     | -4.11       | -16.43     | -1.92        | 10.10      | 8.87         | 4.03       | 4.44         |
| KRT7            | keratin 7                                  | chr12q13.13          | regulation of translation                              | ---                                     | -1.16         | -1.18           | 1.01      | 1.02        | 1.18      | 1.06        | 1.30       | 1.23         | -1.25      | -1.64        | -1.31      | -1.34        |

| ID            | Gene Title                                          | Chromosomal Location  | 1st Gene Ontology Biological Process         | Pathway                                | A2497 30 mins | A2497P' 30 mins | A2497 2 h | A2497P' 2 h | A2497 4 h | A2497P' 4 h | A2497 24 h | A2497P' 24 h | A2497 48 h | A2497P' 48 h | A2497 72 h | A2497P' 72 h |
|---------------|-----------------------------------------------------|-----------------------|----------------------------------------------|----------------------------------------|---------------|-----------------|-----------|-------------|-----------|-------------|------------|--------------|------------|--------------|------------|--------------|
| KRT7          | keratin 7                                           | chr12q13.13           | regulation of translation                    | ---                                    | -1.15         | -1.19           | 1.03      | 1.07        | 1.06      | -1.06       | 1.35       | 1.14         | -1.18      | -1.63        | -1.08      | -1.12        |
| KRT7          | keratin 7                                           | chr12q13.13           | DNA replication                              | ---                                    | -1.03         | -1.07           | -1.06     | 1.00        | -1.01     | -1.08       | 1.20       | 1.11         | -1.12      | -1.45        | -1.08      | -1.09        |
| KRT77         | keratin 77                                          | chr12q13.13           | 0                                            | ---                                    | -1.28         | 2.12            | 1.02      | -1.12       | 3.02      | 1.44        | -3.56      | 1.12         | 6.39       | 3.53         | 2.28       | -1.85        |
| KRT8          | keratin 8                                           | chr12q13              | apoptotic process                            | ---                                    | -1.09         | -1.07           | -1.06     | -1.09       | 1.02      | -1.01       | 1.02       | -1.03        | -1.24      | -1.29        | -1.76      | -1.44        |
| KRT80         | keratin 80                                          | chr12q13.13           | 0                                            | ---                                    | -1.19         | -1.21           | -1.05     | 1.06        | 1.01      | 1.02        | 1.24       | 1.08         | 1.65       | 1.30         | 1.54       | 1.55         |
| KRT86 /// LOC | keratin 86 /// uncharacterized                      | chr12q13              | cytoskeleton organization                    | ---                                    | -1.08         | -1.09           | -1.09     | 1.01        | -1.20     | -1.08       | 1.07       | 1.09         | -1.17      | -1.14        | -1.03      | -1.37        |
| KRT8P12       | keratin 8 pseudogene 12                             | chr3q25.33            | 0                                            | ---                                    | 1.10          | 1.03            | 1.43      | 1.48        | -1.12     | 1.31        | -1.30      | -1.23        | -1.21      | -1.04        | -2.32      | -1.60        |
| KRTAP19-1     | keratin associated protein 1                        | chr21q22.1            | 0                                            | ---                                    | -1.12         | -1.23           | 1.37      | 2.07        | 9.20      | 7.39        | 2.08       | 2.51         | 13.92      | 18.77        | -3.04      | 1.02         |
| KRTAP19-3     | keratin associated protein 1                        | chr21q22.1            | 0                                            | ---                                    | 1.83          | 1.11            | -3.11     | -1.18       | 1.18      | 1.07        | 1.18       | -1.21        | -1.24      | -2.69        | 1.42       | -1.05        |
| KRTAP2-1 ///  | keratin associated protein 2                        | chr17q12-q21 /// chr0 | 0                                            | ---                                    | 3.84          | 3.19            | -1.50     | 2.31        | 3.48      | -1.00       | 4.55       | 2.47         | 1.22       | 4.00         | 2.01       | 10.87        |
| KRTAP2-3 ///  | keratin associated protein 2                        | chr17q21.2            | 0                                            | ---                                    | 1.04          | -1.37           | -1.96     | -1.12       | 1.55      | 1.20        | 1.61       | 1.94         | -1.20      | 1.00         | 1.62       | -1.93        |
| KRTAP4-9      | keratin associated protein 4                        | chr17q21.2            | 0                                            | ---                                    | 1.19          | 2.36            | -2.19     | -1.04       | 1.41      | -1.18       | -1.42      | 1.54         | 1.92       | 1.46         | 1.17       | -1.38        |
| KRTAP9-3      | keratin associated protein 9                        | chr17q12-q21          | 0                                            | ---                                    | 1.77          | 3.75            | -2.24     | -7.54       | -3.10     | 1.70        | -1.41      | 1.51         | 4.55       | 1.06         | 4.54       | 4.24         |
| KSR1          | kinase suppressor of ras 1                          | chr17q11.2            | protein phosphorylation                      | ---                                    | -1.06         | 1.17            | -1.18     | -1.11       | 1.08      | -1.05       | 1.25       | 1.09         | -1.30      | -1.23        | -1.37      | -1.09        |
| KTN1          | kinectin 1 (kinesin receptor)                       | chr14q22.1            | microtubule-based movement                   | ---                                    | 1.01          | 1.05            | -1.05     | -1.04       | 1.10      | 1.13        | 1.13       | 1.14         | -1.13      | 1.05         | -1.30      | -1.35        |
| KTN1          | kinectin 1 (kinesin receptor)                       | chr14q22.1            | microtubule-based movement                   | ---                                    | 1.05          | -1.01           | -1.07     | 1.04        | -1.08     | 1.01        | 1.06       | 1.13         | -1.06      | -1.09        | -1.20      | -1.20        |
| KXDI          | KsDL motif containing 1                             | chr19p13.11           | vesicle-mediated transport                   | ---                                    | -1.05         | -1.02           | 1.01      | 1.06        | 1.02      | -1.10       | 1.08       | 1.05         | 1.34       | 1.27         | 1.27       | 1.33         |
| KXDI          | KsDL motif containing 1                             | chr19p13.11           | vesicle-mediated transport                   | ---                                    | 1.04          | -1.02           | 1.11      | -1.05       | 1.23      | -1.03       | 1.09       | -1.11        | 1.55       | 1.49         | 1.47       | 1.46         |
| KYNU          | kynureninase                                        | chr2q22.2             | tryptophan catabolic process                 | ---                                    | -1.00         | 1.06            | -1.09     | -1.08       | -1.08     | -1.06       | 1.18       | 1.05         | 1.07       | 1.04         | -1.02      | -1.11        |
| KYNU          | kynureninase                                        | chr2q22.2             | tryptophan catabolic process                 | ---                                    | 1.09          | 1.06            | -1.01     | -1.03       | 1.05      | 1.11        | 1.16       | -1.01        | -1.18      | 1.00         | -1.06      | -1.22        |
| KYNU          | kynureninase                                        | chr2q22.2             | tryptophan catabolic process                 | ---                                    | 1.02          | -1.00           | 1.06      | 1.15        | 1.07      | 1.04        | 1.16       | 1.06         | 1.53       | 1.31         | 1.07       | 1.55         |
| KYNU          | kynureninase                                        | chr2q22.2             | tryptophan catabolic process                 | ---                                    | -1.00         | 1.03            | -1.04     | -1.06       | -1.06     | -1.05       | -1.01      | -1.03        | 1.20       | 1.15         | 1.40       | 1.34         |
| L1CAM         | L1 cell adhesion molecule                           | chrXq28               | chemotaxis                                   | ---                                    | 1.15          | -1.04           | -1.00     | -1.10       | 1.10      | -1.02       | 1.13       | 1.02         | 1.23       | 1.08         | 1.20       | 1.67         |
| L1CAM         | L1 cell adhesion molecule                           | chrXq28               | chemotaxis                                   | ---                                    | 1.03          | 1.02            | -1.02     | 1.08        | -1.05     | 1.01        | 1.10       | 1.09         | 1.22       | 1.20         | 1.20       | 1.30         |
| L2HGDH        | L-2-hydroxyglutarate dehydratase                    | chr14q21.3            | 2-oxoglutarate metabolic process             | ---                                    | 1.33          | 1.42            | 1.07      | 1.04        | 1.36      | -1.15       | -1.01      | 1.00         | 1.27       | 1.31         | 1.09       | -1.06        |
| L2HGDH        | L-2-hydroxyglutarate dehydratase                    | chr14q21.3            | 2-oxoglutarate metabolic process             | ---                                    | -1.06         | -1.26           | -1.22     | -1.54       | -1.21     | -1.00       | 1.05       | -1.25        | 1.27       | 1.47         | 1.50       | 1.34         |
| L3HYPDH       | L-3-hydroxyproline dehydratase                      | chr14q23.1            | metabolic process                            | ---                                    | 1.03          | -1.06           | 1.07      | -1.02       | 1.00      | -1.17       | 1.27       | 1.09         | -1.51      | -1.50        | -1.43      | -1.59        |
| L3MBTL3       | l3mbtl-like 3 (Drosophila)                          | chr6p23               | transcription, DNA-dependent                 | ---                                    | 1.20          | 1.37            | -1.16     | -1.03       | -1.12     | 1.09        | -1.28      | -1.28        | -1.76      | -1.55        | -2.18      | -3.74        |
| L3MBTL4       | l3mbtl-like 4 (Drosophila)                          | chr18p11.31           | transcription, DNA-dependent                 | ---                                    | -2.48         | 1.22            | 2.67      | 2.83        | 1.04      | -1.39       | 1.71       | -1.41        | 6.14       | 15.50        | 4.57       | 1.72         |
| LA16c-329F2   | NULL /// NULL                                       | ---                   | 0                                            | ---                                    | -1.01         | 1.35            | -1.36     | -1.13       | -6.14     | -1.82       | -1.39      | -1.69        | 10.24      | 5.68         | -3.90      | -1.24        |
| LA16c-360H    | NULL /// NULL                                       | ---                   | 0                                            | ---                                    | -1.02         | 1.40            | -1.32     | 1.08        | 1.19      | 1.38        | 1.49       | 1.35         | 1.44       | 1.29         | 1.63       | 1.68         |
| LA16c-431H    | NULL /// NULL                                       | ---                   | 0                                            | ---                                    | 1.78          | 2.63            | 1.19      | 1.27        | -1.03     | -1.03       | -1.17      | -2.03        | 2.58       | 2.30         | 1.69       | 1.41         |
| LACC1         | laccase (multicopper oxidase)                       | chr13q14.11           | 0                                            | ---                                    | 1.20          | 1.08            | 1.20      | 1.20        | 1.07      | 1.14        | -1.16      | 1.01         | 1.19       | 1.49         | -1.07      | -1.09        |
| LACC1         | laccase (multicopper oxidase)                       | chr13q14.11           | 0                                            | ---                                    | 1.11          | -1.15           | -1.07     | 1.30        | -1.19     | -1.03       | 1.19       | 1.19         | 1.22       | 1.51         | 1.30       | 1.35         |
| LACTB         | lactamase, beta                                     | chr15q22.1            | 0                                            | ---                                    | 1.21          | 1.10            | 1.11      | -1.02       | 1.05      | -1.01       | 1.28       | 1.09         | 1.39       | 1.23         | 1.66       | 1.29         |
| LACTB         | lactamase, beta                                     | chr15q22.1            | 0                                            | ---                                    | 1.10          | 1.19            | 1.05      | -1.24       | 1.00      | 1.02        | 1.28       | -1.01        | 1.20       | 1.20         | 1.48       | 1.22         |
| LACTB         | lactamase, beta                                     | chr15q22.1            | 0                                            | ---                                    | 1.20          | 1.13            | 1.04      | -1.06       | 1.12      | 1.14        | 1.61       | 1.30         | 1.49       | 1.56         | -1.03      | 1.15         |
| LACTB2        | lactamase, beta 2                                   | chr8q13.3             | 0                                            | ---                                    | -1.00         | -1.09           | 1.07      | -1.05       | 1.02      | 1.02        | -1.43      | -1.19        | -1.27      | -1.36        | -1.11      | -1.06        |
| LACTB2        | lactamase, beta 2                                   | chr8q13.3             | 0                                            | ---                                    | 1.05          | -1.03           | -1.04     | -1.03       | -1.07     | 1.08        | -1.43      | 1.00         | -1.39      | -1.49        | -1.75      | -1.88        |
| LAIR2         | leukocyte-associated immunoglobulin-like receptor 2 | chr19q13.4            | 0                                            | ---                                    | -1.44         | -5.13           | 2.27      | -1.15       | -2.97     | -2.32       | 3.14       | 1.38         | 3.83       | 1.65         | 4.45       | 6.80         |
| LAMA3         | laminin, alpha 3                                    | chr18q11.2            | regulation of transcription, DNA-dependent   | ---                                    | -1.42         | -1.09           | 1.25      | 1.16        | 1.10      | 1.11        | -1.13      | 1.02         | -1.87      | -1.36        | -1.64      | -1.24        |
| LAMA4         | laminin, alpha 4                                    | chr6p21               | blood vessel development                     | ---                                    | -1.01         | -1.07           | 1.04      | 1.02        | 1.19      | -1.00       | 1.46       | 1.18         | 1.69       | 1.38         | 1.55       | 1.28         |
| LAMA4         | laminin, alpha 4                                    | chr6p21               | blood vessel development                     | ---                                    | 1.05          | 1.06            | 1.01      | 1.12        | 1.02      | -1.02       | 1.23       | 1.29         | -1.49      | -1.39        | -1.54      | -1.41        |
| LAMA4         | laminin, alpha 4                                    | chr6p21               | blood vessel development                     | ---                                    | -1.24         | 1.01            | 1.00      | -1.18       | 1.30      | 1.14        | 1.32       | 1.01         | 1.13       | -1.06        | 1.47       | 1.49         |
| LAMB2P1       | laminin, beta 2 pseudogene                          | chr3p21.3-p21.2       | 0                                            | ---                                    | 1.96          | 1.55            | 1.32      | 1.45        | 1.05      | 1.10        | -1.14      | -1.56        | 2.40       | 2.20         | 2.89       | 3.30         |
| LAMB3         | laminin, beta 3                                     | chr1q32               | cell adhesion                                | ---                                    | -1.07         | -1.13           | 1.06      | 1.14        | 1.04      | -1.10       | 1.20       | 1.16         | 1.72       | 1.36         | 1.84       | 1.94         |
| LAMC1         | laminin, gamma 1 (former)                           | chr1q31               | protein complex assembly                     | Inflammatory_Response_Pathway // GenMA | -1.10         | -1.10           | -1.04     | 1.11        | 1.12      | -1.03       | 1.36       | 1.38         | 1.49       | 1.33         | 1.38       | 1.56         |
| LAMC2         | laminin, gamma 2                                    | chr1q25-q31           | cell adhesion                                | Inflammatory_Response_Pathway // GenMA | -1.81         | -1.42           | 1.12      | 1.07        | 1.37      | 1.75        | -1.46      | 1.52         | 1.96       | 1.15         | 4.59       | 2.82         |
| LAMP1         | lysosomal-associated membrane protein 1             | chr13q34              | autophagy                                    | ---                                    | -1.07         | -1.02           | -1.03     | -1.02       | -1.02     | -1.03       | 1.03       | -1.05        | 1.29       | 1.09         | 1.06       | 1.06         |
| LAMP3         | lysosomal-associated membrane protein 3             | chr3q26.3-q27         | cell proliferation                           | ---                                    | -2.43         | -2.22           | 1.26      | 1.51        | 1.11      | 1.33        | 1.54       | 1.22         | 1.31       | 1.01         | -1.58      | -1.84        |
| LAMTOR3       | late endosomal/lysosomal protein                    | chr4q23               | phosphorylation                              | ---                                    | 1.26          | 1.01            | 1.06      | 1.05        | -1.06     | -1.07       | -1.08      | -1.25        | -1.91      | -1.46        | -2.07      | -1.98        |
| LAMTOR5       | late endosomal/lysosomal protein                    | chr1p13.3             | regulation of cell size                      | ---                                    | 1.02          | 1.07            | 1.04      | -1.06       | 1.22      | -1.17       | 1.09       | 1.05         | 1.40       | 1.22         | 1.38       | 1.32         |
| LAMTOR5       | late endosomal/lysosomal protein                    | chr1p13.3             | regulation of cell size                      | ---                                    | 1.03          | 1.05            | -1.06     | 1.07        | -1.11     | -1.05       | -1.11      | -1.04        | 1.20       | 1.21         | 1.16       | 1.16         |
| LANCL1        | LanC lantibiotic synthetase                         | chr2q33-q35           | G-protein coupled receptor signaling pathway | ---                                    | 1.14          | 1.15            | -1.02     | 1.00        | 1.07      | -1.12       | 1.06       | 1.03         | -1.56      | -1.81        | -1.76      | -1.97        |
| LANCL1        | LanC lantibiotic synthetase                         | chr2q33-q35           | G-protein coupled receptor signaling pathway | ---                                    | 1.11          | 1.06            | -1.09     | -1.07       | -1.07     | 1.04        | -1.04      | -1.09        | -1.50      | -1.15        | -1.63      | -1.63        |
| LANCL2        | LanC lantibiotic synthetase                         | chr7q31.1-q31.33      | metabolic process                            | ---                                    | -1.08         | 1.02            | 1.05      | -1.12       | 1.12      | 1.03        | -1.14      | -1.07        | -3.00      | -2.59        | -2.52      | -3.01        |
| LANCL3        | LanC lantibiotic synthetase                         | chrXp21.1             | metabolic process                            | ---                                    | 1.79          | 1.14            | -1.20     | 1.31        | -1.01     | 1.29        | -1.09      | -2.17        | 1.37       | 1.40         | 1.84       | 1.03         |
| LAPTM4B       | lysosomal protein transmembrane 4 beta              | chr8q22.1             | transport                                    | ---                                    | -1.05         | -1.03           | -1.03     | -1.07       | 1.01      | -1.01       | 1.11       | 1.04         | 1.18       | 1.17         | 1.00       | 1.01         |
| LARGE-AS1     | LARGE antisense RNA 1                               | ---                   | 0                                            | ---                                    | -1.07         | -1.69           | -1.33     | 1.17        | -3.97     | -1.03       | 1.85       | 2.75         | -1.34      | -1.09        | 1.53       | 1.93         |
| LARP1         | La ribonucleoprotein domain 1                       | chr5q33.2             | positive regulation of macroautophagy        | ---                                    | -1.04         | -1.01           | -1.08     | -1.05       | -1.02     | -1.03       | 1.01       | -1.10        | 1.05       | 1.00         | 1.02       | -1.04        |
| LARP1B        | La ribonucleoprotein domain 1B                      | chr4q28.2             | 0                                            | ---                                    | 1.06          | 1.05            | 1.09      | 1.07        | 1.05      | -1.05       | -1.00      | 1.01         | 1.26       | 1.16         | 1.45       | 1.33         |
| LARP1B        | La ribonucleoprotein domain 1B                      | chr4q28.2             | 0                                            | ---                                    | -1.05         | -1.26           | -1.12     | -1.14       | 1.01      | -1.04       | 1.11       | 1.13         | -2.63      | -1.66        | -2.50      | -1.89        |
| LARP1B        | La ribonucleoprotein domain 1B                      | chr4q28.2             | 0                                            | ---                                    | -1.01         | 1.11            | 1.13      | 1.08        | -1.19     | -1.18       | -1.42      | -1.02        | 1.21       | 1.11         | 1.32       | 1.33         |
| LARP4         | La ribonucleoprotein domain 4                       | chr12q13.12           | cytoskeleton organization                    | ---                                    | 1.13          | 1.04            | 1.04      | 1.16        | -1.15     | 1.23        | -1.32      | -1.07        | -2.12      | -2.11        | -1.51      | -2.01        |
| LARP4         | La ribonucleoprotein domain 4                       | chr12q13.12           | cytoskeleton organization                    | ---                                    | -1.14         | -1.04           | -1.05     | 1.07        | 1.07      | -1.05       | 1.26       | 1.03         | -1.01      | 1.12         | 1.31       | 1.34         |
| LARP4         | La ribonucleoprotein domain 4                       | chr12q13.12           | cytoskeleton organization                    | ---                                    | -1.06         | -1.22           | -1.03     | -1.02       | 1.28      | 1.17        | 1.07       | -1.00        | 1.22       | 1.17         | 1.13       | 1.14         |

| ID       | Gene Title                                          | Chromosomal Location | 1st Gene Ontology Biological Process                                              | Pathway                                   | A2497 30 mins | A2497P' 30 mins | A2497 2 h | A2497P' 2 h | A2497 4 h | A2497P' 4 h | A2497 24 h | A2497P' 24 h | A2497 48 h | A2497P' 48 h | A2497 72 h | A2497P' 72 h |
|----------|-----------------------------------------------------|----------------------|-----------------------------------------------------------------------------------|-------------------------------------------|---------------|-----------------|-----------|-------------|-----------|-------------|------------|--------------|------------|--------------|------------|--------------|
| LARP4B   | La ribonucleoprotein domain                         | chr10p15.3           | regulation of translation                                                         | ---                                       | -1.06         | -1.01           | 1.00      | -1.00       | -1.03     | -1.06       | -1.00      | 1.10         | -1.16      | -1.11        | 1.37       | 1.33         |
| LARP4B   | La ribonucleoprotein domain                         | chr10p15.3           | regulation of translation                                                         | ---                                       | 1.18          | 1.11            | 1.06      | 1.10        | 1.26      | 1.18        | -1.34      | -1.28        | -1.55      | -1.41        | 1.01       | -1.07        |
| LARP6    | La ribonucleoprotein domain                         | chr15q23             | RNA processing                                                                    | ---                                       | -1.05         | -1.11           | -1.13     | -1.16       | 1.02      | -1.13       | 1.52       | 1.30         | 1.71       | 1.93         | 1.62       | 1.63         |
| LARP7    | La ribonucleoprotein domain                         | chr4q25              | RNA processing                                                                    | ---                                       | 1.18          | 1.15            | 1.24      | 1.02        | 1.05      | 1.03        | -1.07      | -1.09        | -1.48      | -1.30        | -1.34      | -2.14        |
| LARS     | leucyl-tRNA synthetase                              | chr5q32              | translation                                                                       | ---                                       | 1.02          | -1.01           | 1.00      | 1.01        | 1.05      | 1.04        | 1.01       | -1.02        | 1.10       | 1.16         | 1.19       | 1.25         |
| LAS1L    | LAS1-like (S. cerevisiae)                           | chrXq12              | rRNA processing                                                                   | ---                                       | 1.02          | -1.49           | 1.05      | -1.22       | -1.24     | -1.21       | 1.47       | 1.40         | 1.22       | -1.19        | -1.87      | -1.60        |
| LATS1    | large tumor suppressor kinase                       | chr6q25.1            | G2                                                                                | ---                                       | 1.56          | 1.17            | 1.25      | 1.56        | -1.18     | 1.45        | -2.43      | -1.44        | -1.04      | -1.59        | 1.54       | 1.11         |
| LATS2    | large tumor suppressor kinase                       | chr13q11-q12         | G1                                                                                | ---                                       | -1.02         | 1.06            | -1.00     | 1.04        | -1.00     | 1.02        | -1.11      | -1.04        | -1.05      | -1.03        | 1.45       | 1.36         |
| LATS2    | large tumor suppressor kinase                       | chr13q11-q12         | G1                                                                                | ---                                       | -1.07         | -1.20           | 1.39      | 1.42        | -1.57     | 1.08        | 3.71       | 2.05         | 5.53       | 4.74         | 5.02       | 4.24         |
| LAYN     | layilin                                             | chr11q23.1           | 0                                                                                 | ---                                       | -1.51         | -1.56           | -1.59     | -3.36       | 1.09      | 1.60        | -2.85      | -2.49        | 3.06       | 1.77         | 1.90       | 2.56         |
| LBP      | lipopolysaccharide binding                          | chr20q11.23          | toll-like receptor signaling pathway                                              | ---                                       | 1.33          | 3.02            | -1.21     | -3.07       | 5.00      | 1.53        | -1.23      | 1.44         | 2.24       | -1.39        | 5.95       | 6.09         |
| LBR      | lamin B receptor                                    | chr14q2.1            | cholesterol biosynthetic process                                                  | ---                                       | 1.07          | 1.07            | -1.06     | -1.08       | -1.10     | 1.12        | -1.11      | -1.14        | -1.14      | -1.02        | -1.19      | -1.30        |
| LBX1     | ladybird homeobox 1                                 | chr10q24             | heart looping                                                                     | ---                                       | 1.30          | 1.21            | -1.15     | -1.01       | 1.07      | 1.66        | -1.17      | -1.39        | -1.35      | -1.94        | -1.75      | -1.56        |
| LBX2-AS1 | LBX2 antisense RNA 1                                | chr2p13.1            | 0                                                                                 | ---                                       | 1.09          | 1.21            | -1.09     | -1.08       | 1.13      | -1.11       | 1.52       | 1.57         | -1.79      | -1.79        | -1.75      | -1.42        |
| LCA5     | Leber congenital amaurosis                          | chr6q14.1            | transport                                                                         | ---                                       | 1.82          | 1.17            | 1.28      | 1.06        | -1.23     | -1.23       | -1.21      | 1.10         | -2.69      | -2.56        | -1.70      | -3.53        |
| LCA5     | Leber congenital amaurosis                          | chr6q14.1            | transport                                                                         | ---                                       | -1.02         | -1.42           | 1.07      | 1.02        | -1.21     | 1.40        | 1.03       | 1.15         | -1.72      | -2.07        | -1.74      | -2.03        |
| LCAT     | lecithin-cholesterol acyltransferase                | chr16q22.1           | lipid metabolic process                                                           | Statin_Pathway_PharmGKB // GenMAPP        | -1.73         | -1.79           | -1.22     | 2.65        | -1.79     | -1.98       | 2.47       | -1.82        | 2.34       | 6.59         | 3.05       | 1.78         |
| LCAT     | lecithin-cholesterol acyltransferase                | chr16q22.1           | lipid metabolic process                                                           | Statin_Pathway_PharmGKB // GenMAPP        | -2.39         | -1.97           | -1.11     | 1.20        | -1.01     | 1.02        | 3.16       | 2.83         | 2.95       | 1.07         | 4.12       | 4.65         |
| LCLAT1   | lysocardiolipin acyltransferase                     | chr2p23.1            | lipid metabolic process                                                           | ---                                       | -1.04         | 1.04            | -1.02     | -1.06       | -1.01     | -1.02       | -1.16      | -1.09        | -1.29      | -1.21        | -1.24      | -1.39        |
| LCMT2    | leucine carboxyl methyltransferase                  | chr15q15.3           | rRNA processing                                                                   | ---                                       | 1.02          | -1.02           | 1.03      | -1.12       | 1.06      | 1.06        | -1.17      | -1.04        | -2.22      | -2.14        | -1.82      | -1.84        |
| LCN10    | lipocalin 10                                        | chr9q34.3            | transport                                                                         | ---                                       | 1.40          | -1.09           | 1.28      | 1.61        | 1.07      | 1.09        | -1.55      | -1.27        | -1.11      | -1.45        | -1.50      | -1.20        |
| LCOR     | ligand dependent nuclear corepressor                | chr10q24             | negative regulation of transcription from RNA polymerase II promoter              | ---                                       | -1.12         | -1.10           | 1.01      | -1.07       | 1.08      | 1.13        | -1.10      | -1.16        | -1.04      | -1.03        | 1.10       | 1.25         |
| LCORL    | ligand dependent nuclear corepressor                | chr4p15.31           | transcription, DNA-dependent                                                      | ---                                       | 1.30          | 1.31            | 1.02      | -1.06       | 1.10      | 1.14        | -1.41      | -1.10        | -1.88      | -1.73        | -1.34      | -1.22        |
| LCORL    | ligand dependent nuclear corepressor                | chr4p15.31           | transcription, DNA-dependent                                                      | ---                                       | -1.06         | 1.10            | 1.01      | -1.02       | -1.13     | -1.03       | -1.06      | 1.07         | 1.37       | 1.67         | 1.59       | 1.49         |
| LDB1     | LIM domain binding 1                                | chr10q24-q25         | transcription-dependent tethering of RNA polymerase II                            | ---                                       | 1.06          | -1.06           | -1.09     | -1.15       | 1.12      | 1.12        | 1.03       | 1.02         | -1.24      | -1.33        | -1.19      | -1.41        |
| LDB1     | LIM domain binding 1                                | chr10q24-q25         | transcription-dependent tethering of RNA polymerase II                            | ---                                       | -1.04         | -1.19           | 1.02      | 1.03        | 1.25      | 1.21        | -1.18      | -1.16        | -1.69      | -1.97        | -1.27      | -1.50        |
| LDB3     | LIM domain binding 3                                | chr10q22.3-q23.2     | sarcomere organization                                                            | ---                                       | 1.74          | 2.72            | 1.74      | 1.66        | -1.69     | -1.41       | -3.38      | -1.25        | 4.71       | 4.16         | 1.82       | -1.11        |
| LDHB     | lactate dehydrogenase B                             | chr12p12.2-p12.1     | carbohydrate metabolic process                                                    | Glycolysis_and_Gluconeogenesis // GenMAPP | -1.05         | -1.01           | -1.04     | 1.01        | -1.02     | -1.05       | 1.05       | -1.01        | 1.31       | 1.07         | 1.01       | -1.00        |
| LDHB     | lactate dehydrogenase B                             | chr12p12.2-p12.1     | carbohydrate metabolic process                                                    | Glycolysis_and_Gluconeogenesis // GenMAPP | -1.06         | 1.06            | -1.08     | -1.03       | -1.03     | -1.06       | 1.11       | 1.03         | 1.33       | 1.08         | 1.04       | 1.04         |
| LDLR     | low density lipoprotein receptor                    | chr19p13.2           | retinoid metabolic process                                                        | Statin_Pathway_PharmGKB // GenMAPP        | 1.11          | -1.08           | 1.04      | -1.00       | 1.04      | -1.03       | 1.20       | -1.04        | 2.13       | 1.79         | 2.32       | 1.99         |
| LDLR     | low density lipoprotein receptor                    | chr19p13.2           | retinoid metabolic process                                                        | Statin_Pathway_PharmGKB // GenMAPP        | -1.01         | 1.05            | 1.13      | 1.12        | 1.29      | 1.07        | 1.28       | 1.10         | 3.33       | 2.79         | 2.46       | 2.38         |
| LDLR     | low density lipoprotein receptor                    | chr19p13.2           | retinoid metabolic process                                                        | Statin_Pathway_PharmGKB // GenMAPP        | -1.10         | -1.10           | 1.06      | 1.23        | 1.15      | -1.11       | 1.27       | 1.38         | 3.02       | 2.18         | 1.99       | 2.10         |
| LDLRAD4  | low density lipoprotein receptor class B type 4     | chr18p11.21          | 0                                                                                 | ---                                       | 1.55          | 1.40            | -1.04     | 1.42        | -1.09     | 1.05        | -1.96      | -1.86        | -2.76      | -3.16        | -4.59      | -4.53        |
| LDLRAD4  | low density lipoprotein receptor class B type 4     | chr18p11.21          | 0                                                                                 | ---                                       | 1.25          | 1.31            | 1.04      | -1.37       | -1.20     | 1.17        | -1.02      | -1.04        | -3.35      | -1.40        | -2.17      | -2.86        |
| LDLRAP1  | low density lipoprotein receptor class B type 5     | chr1p36-p35          | lipid metabolic process                                                           | ---                                       | 1.09          | -1.11           | 1.04      | 1.09        | 1.21      | 1.03        | -1.05      | -1.04        | -1.25      | -1.44        | -1.85      | -1.60        |
| LDLRAP1  | low density lipoprotein receptor class B type 5     | chr1p36-p35          | lipid metabolic process                                                           | ---                                       | -1.14         | -1.15           | 1.01      | 1.15        | 1.23      | 1.02        | 1.18       | 1.09         | -1.12      | -1.09        | -1.66      | -1.42        |
| LDOC1    | leucine zipper, down-regulated in colorectal cancer | chrXq27              | negative regulation of cell proliferation                                         | ---                                       | 1.05          | 1.04            | 1.01      | 1.04        | -1.02     | -1.09       | 1.05       | 1.14         | -1.01      | -1.02        | -1.33      | -1.21        |
| LDOC1L   | leucine zipper, down-regulated in colorectal cancer | chr22q13.31          | 0                                                                                 | ---                                       | -1.02         | 1.01            | -1.01     | 1.06        | 1.07      | 1.01        | 1.07       | 1.02         | -1.02      | -1.06        | -1.22      | -1.14        |
| LEAP2    | leukocyte cell-derived chemotaxin 2                 | chr5q31.1            | defense response to bacterium                                                     | ---                                       | 1.27          | 1.10            | -1.31     | -1.42       | -1.38     | 1.04        | -1.17      | -1.20        | 1.13       | 1.29         | 1.34       | 1.26         |
| LECT2    | leukocyte cell-derived chemotaxin 2                 | chr5q31.1            | skeletal system development                                                       | ---                                       | 3.01          | -1.02           | -2.83     | -5.01       | -2.05     | -5.51       | 4.57       | 1.44         | 5.67       | 7.45         | 10.25      | 22.87        |
| LEF1-AS1 | LEF1 antisense RNA 1                                | chr4q25              | 0                                                                                 | TGF_Beta_Signaling_Pathway // GenMAPP     | 3.04          | 2.12            | -1.13     | -2.48       | -1.06     | -1.33       | -1.52      | 2.09         | 2.03       | 1.11         | 2.38       | 1.11         |
| LEFTY2   | left-right determination factor 2                   | chr14q2.1            | platelet degranulation                                                            | ---                                       | -1.66         | 1.13            | 1.33      | -11.56      | -1.12     | 1.27        | -3.34      | -1.87        | 3.17       | 2.58         | 3.12       | 10.85        |
| LEMD1    | LEM domain containing 1                             | chr1q32.1            | 0                                                                                 | ---                                       | 2.23          | 1.03            | 1.48      | 1.40        | 1.15      | 1.19        | 1.33       | -1.65        | 3.61       | 2.83         | 3.18       | 3.30         |
| LEMD2    | LEM domain containing 2                             | chr6p21.31           | skeletal muscle cell differentiation                                              | ---                                       | -1.06         | -1.28           | 1.67      | 2.20        | -2.83     | -1.73       | -1.05      | 1.72         | 2.84       | 2.17         | 2.36       | 1.85         |
| LEMD3    | LEM domain containing 3                             | chr12q14             | negative regulation of transforming growth factor beta receptor signaling pathway | ---                                       | -1.03         | 1.02            | 1.01      | -1.06       | -1.08     | 1.00        | -1.06      | -1.07        | -1.33      | -1.20        | 1.04       | -1.08        |
| LENG1    | leukocyte receptor cluster 1                        | chr19q13.4           | 0                                                                                 | ---                                       | -1.21         | 1.01            | -1.16     | -1.14       | 1.12      | -1.10       | -1.03      | 1.08         | 1.35       | 1.10         | 1.40       | 1.49         |
| LENG9    | leukocyte receptor cluster 9                        | chr19q13.4           | RNA metabolic process                                                             | ---                                       | -1.02         | -1.05           | -1.12     | -1.21       | -1.10     | -1.09       | -1.06      | 1.15         | -1.57      | -1.31        | -1.30      | -1.32        |
| LEO1     | Leo1, Paf1/RNA polymerase II holoenzyme subunit     | chr15q21.2           | endodermal cell fate commitment                                                   | ---                                       | -1.08         | -1.06           | 1.04      | -1.06       | 1.05      | -1.01       | 1.26       | 1.14         | 1.21       | 1.22         | 1.16       | 1.21         |
| LEPR     | leptin receptor                                     | chr1p31              | energy reserve metabolic process                                                  | ---                                       | -1.16         | -1.87           | -1.18     | 1.06        | 1.64      | 1.50        | 1.13       | 1.06         | 1.09       | 1.02         | 1.53       | 1.26         |
| LEPR     | leptin receptor                                     | chr1p31              | energy reserve metabolic process                                                  | ---                                       | 1.04          | -1.06           | 1.08      | -1.05       | 1.15      | 1.07        | 1.02       | 1.38         | 1.63       | 1.56         | 2.11       | 2.16         |
| LEPR     | leptin receptor                                     | chr1p31              | energy reserve metabolic process                                                  | ---                                       | -1.01         | -1.15           | -1.02     | 1.08        | 1.10      | 1.07        | 1.19       | 1.31         | 1.55       | 1.53         | 2.29       | 2.13         |
| LEPR     | leptin receptor                                     | chr1p31              | energy reserve metabolic process                                                  | ---                                       | -1.22         | -1.19           | 1.01      | 1.05        | 1.19      | 1.15        | 1.09       | 1.15         | 1.37       | 1.55         | 2.32       | 2.28         |
| LEPRE1   | leucine proline-enriched protein 1                  | chr1p34.1            | negative regulation of cell proliferation                                         | ---                                       | -1.13         | -1.24           | 1.04      | 1.12        | -1.05     | -1.30       | 1.05       | -1.03        | 1.10       | -1.01        | 1.25       | 1.52         |
| LEPREL1  | leprecan-like 1                                     | chr3q28              | negative regulation of cell proliferation                                         | ---                                       | -1.11         | -1.19           | 1.06      | 1.09        | 1.09      | -1.02       | 1.59       | 1.22         | 1.42       | 1.24         | 1.20       | 1.25         |
| LEPREL4  | leprecan-like 4                                     | chr17q21.2           | synaptonemal complex assembly                                                     | ---                                       | -1.08         | -1.12           | -1.01     | 1.23        | -1.01     | -1.10       | 1.13       | 1.18         | 1.42       | 1.25         | 1.27       | 1.49         |
| LEPROT   | leptin receptor overlapping with LEP                | chr1p31.3            | negative regulation of JAK-STAT cascade                                           | ---                                       | 1.04          | 1.10            | -1.02     | -1.08       | -1.06     | 1.07        | -1.36      | -1.12        | -3.22      | -2.76        | -4.15      | -4.53        |
| LEPROT   | leptin receptor overlapping with LEP                | chr1p31.3            | negative regulation of JAK-STAT cascade                                           | ---                                       | 1.06          | 1.13            | 1.08      | -1.00       | -1.00     | -1.07       | -1.07      | -1.04        | -1.74      | -1.49        | -1.73      | -1.74        |
| LEPROT   | leptin receptor overlapping with LEP                | chr1p31.3            | negative regulation of JAK-STAT cascade                                           | ---                                       | -1.06         | 1.01            | 1.01      | -1.22       | -1.00     | -1.02       | -1.16      | -1.07        | -1.99      | -1.65        | -1.64      | -1.74        |
| LEPROTL1 | leptin receptor overlapping with LEP                | chr8p21              | 0                                                                                 | ---                                       | -1.03         | -1.10           | 1.07      | 1.02        | 1.05      | 1.03        | 1.08       | 1.03         | 1.11       | 1.10         | 1.42       | 1.25         |
| LETM1    | leucine zipper-EF-hand domain containing 1          | chr4p16.3            | cristae formation                                                                 | ---                                       | -1.05         | 1.06            | -1.28     | -1.13       | -1.35     | -1.15       | -1.26      | 1.05         | 1.31       | 1.18         | 1.51       | 1.49         |
| LETM2    | leucine zipper-EF-hand domain containing 2          | chr8p11.23           | 0                                                                                 | ---                                       | 1.48          | 1.19            | 1.07      | -1.29       | 1.06      | 1.47        | -1.02      | -1.22        | 1.41       | 1.61         | 1.06       | -1.14        |
| LETM2    | leucine zipper-EF-hand domain containing 2          | chr8p11.23           | 0                                                                                 | ---                                       | -1.03         | 1.10            | 1.07      | 1.09        | -1.03     | -1.17       | 2.25       | 1.27         | 6.97       | 4.74         | 6.81       | 6.24         |
| LETMD1   | LETM1 domain containing 1                           | chr12q13.12          | 0                                                                                 | ---                                       | -1.06         | -1.14           | 1.07      | 1.08        | 1.06      | 1.03        | 1.35       | 1.14         | -1.04      | 1.02         | 1.18       | 1.36         |
| LFNG     | LFNG O-fucosyltransferase 3                         | chr7p22.2            | ovarian follicle development                                                      | ---                                       | -1.01         | -1.18           | 1.10      | 1.20        | -1.02     | 1.03        | -1.31      | -1.27        | -1.96      | -1.89        | -2.09      | -1.74        |
| LGALS1   | lectin, galactoside-binding, soluble                | chr22q13.1           | plasma cell differentiation                                                       | ---                                       | -1.09         | -1.08           | -1.04     | -1.09       | 1.14      | 1.00        | 1.07       | -1.02        | 1.57       | 1.36         | 1.77       | 1.85         |
| LGALS2   | lectin, galactoside-binding, soluble                | chr11q13             | apoptotic process                                                                 | ---                                       | 1.85          | 1.07            | -1.20     | -8.75       | -1.76     | 3.37        | -3.06      | -1.24        | 1.36       | 2.11         | -6.31      | -5.38        |

| ID           | Gene Title                   | Chromosomal Location   | 1st Gene Ontology Biological Process      | Pathway                               | A2497 30 mins | A2497P' 30 mins | A2497 2 h | A2497P' 2 h | A2497 4 h | A2497P' 4 h | A2497 24 h | A2497P' 24 h | A2497 48 h | A2497P' 48 h | A2497 72 h | A2497P' 72 h |
|--------------|------------------------------|------------------------|-------------------------------------------|---------------------------------------|---------------|-----------------|-----------|-------------|-----------|-------------|------------|--------------|------------|--------------|------------|--------------|
| LGALS13      | lectin, galactoside-binding  | chr19q13.1             | lipid metabolic process                   | ---                                   | -4.08         | -2.83           | 6.36      | 8.15        | -1.31     | -1.32       | 1.61       | 3.34         | 4.06       | 10.35        | 1.52       | 1.27         |
| LGALS7 /// L | lectin, galactoside-binding  | chr19q13.2             | apoptotic process                         | ---                                   | 2.10          | 1.88            | 3.19      | 4.17        | 1.02      | -1.66       | 2.41       | 3.31         | -1.37      | -1.29        | 1.12       | 1.83         |
| LGALS8       | lectin, galactoside-binding  | chr1q43                | plasma cell differentiation               | ---                                   | -1.08         | -1.18           | -1.06     | -1.06       | 1.12      | -1.08       | 1.13       | 1.03         | -1.25      | -1.57        | -1.16      | 1.14         |
| LGALS8       | lectin, galactoside-binding  | chr1q43                | plasma cell differentiation               | ---                                   | -1.08         | -1.02           | 1.05      | 1.03        | 1.01      | -1.01       | 1.06       | -1.02        | -1.01      | -1.11        | -1.03      | 1.02         |
| LGALS8       | lectin, galactoside-binding  | chr1q43                | plasma cell differentiation               | ---                                   | -1.03         | -1.06           | -1.04     | 1.07        | -1.03     | -1.06       | 1.13       | 1.04         | -1.08      | -1.06        | -1.23      | -1.01        |
| LGALS8       | lectin, galactoside-binding  | chr1q43                | plasma cell differentiation               | ---                                   | -1.03         | -1.03           | 1.12      | 1.11        | 1.04      | -1.04       | 1.11       | 1.05         | 1.43       | 1.19         | -1.01      | 1.20         |
| LGALS8       | lectin, galactoside-binding  | chr2p14                | 0                                         | ---                                   | -1.04         | 1.01            | 1.03      | 1.04        | -1.13     | -1.04       | 1.07       | 1.05         | 1.32       | 1.15         | 1.24       | 1.08         |
| LGI2         | leucine-rich repeat LGI fam  | chr4p15.2              | 0                                         | ---                                   | -1.06         | 1.26            | -2.39     | -3.43       | 1.96      | 1.51        | 1.70       | 2.53         | 3.91       | 6.43         | 1.54       | 1.87         |
| LGR4         | leucine-rich repeat containi | chr11p14-p13           | osteoblast differentiation                | ---                                   | 1.14          | 1.13            | 1.02      | 1.01        | -1.12     | -1.12       | -1.13      | -1.02        | -1.15      | -1.12        | 1.30       | 1.21         |
| LGR5         | leucine-rich repeat containi | chr12q22-q23           | signal transduction                       | ---                                   | 2.23          | 3.16            | -1.59     | -2.20       | -1.17     | -1.15       | -1.38      | 1.16         | -3.26      | -4.76        | -4.68      | -7.59        |
| LGR6         | leucine-rich repeat containi | chr1q32.1              | signal transduction                       | GPCRDB_Other // GenMAPP               | 1.26          | 1.03            | 1.25      | 1.06        | 1.19      | -1.03       | 1.23       | 1.26         | -1.20      | -1.40        | -4.49      | -2.51        |
| LGSN         | lensin, lens protein with g  | chr6pter-q22.33        | glutamine biosynthetic process            | ---                                   | 1.08          | -1.28           | 1.16      | 1.09        | 1.01      | -1.07       | 1.73       | 1.45         | -2.28      | -1.92        | -2.23      | -2.62        |
| LHFPL2       | lipoma HMGIC fusion part     | chr5q14.1              | 0                                         | ---                                   | 1.05          | 1.13            | -1.08     | -1.27       | -1.00     | -1.10       | -1.03      | 1.06         | 1.32       | 1.34         | 1.36       | 1.36         |
| LHFPL3-AS1   | LHFPL3 antisense RNA 1       | chr7q22.1              | 0                                         | ---                                   | 1.13          | -1.04           | -1.52     | 1.36        | 1.06      | 1.30        | 1.80       | -1.27        | 4.96       | 4.85         | 1.06       | 1.50         |
| LHFPL3-AS2   | LHFPL3 antisense RNA 2       | ---                    | 0                                         | ---                                   | 2.48          | 3.63            | -1.04     | 1.34        | -1.04     | 1.38        | 1.66       | 1.48         | 2.80       | 2.67         | -1.84      | -1.53        |
| LHPP         | phospholysine phosphohist    | chr10q26.13            | protein dephosphorylation                 | ---                                   | -1.10         | -1.12           | 1.10      | -1.00       | 1.11      | 1.02        | 1.33       | 1.20         | 1.47       | 1.57         | 1.11       | 1.29         |
| LHX4         | LIM homeobox 4               | chr1q25.2              | placenta development                      | ---                                   | -1.21         | -1.30           | -1.04     | 1.21        | -1.42     | -1.27       | -1.24      | 1.01         | -1.93      | -1.56        | -1.37      | -1.62        |
| LHX5         | LIM homeobox 5               | chr12q24               | transcription, DNA-dependent              | ---                                   | 2.63          | 2.58            | -1.03     | 1.05        | 1.14      | -1.08       | 1.50       | -2.49        | 5.96       | 4.88         | 1.00       | -1.51        |
| LHX6         | LIM homeobox 6               | chr9q33.2              | transcription, DNA-dependent              | ---                                   | -1.04         | 1.04            | -1.17     | -1.21       | 1.02      | 1.29        | 1.36       | 1.03         | 1.47       | 1.35         | 1.84       | 1.97         |
| LIAS         | lipic acid synthetase        | chr4p14                | neural tube closure                       | ---                                   | 1.05          | 1.16            | 1.03      | -1.15       | 1.16      | -1.03       | -1.36      | -1.15        | -1.31      | -1.18        | 1.06       | 1.09         |
| LIF          | leukemia inhibitory factor   | chr22q12.2             | blood vessel remodeling                   | TGF_Beta_Signaling_Pathway // GenMAPP | -1.89         | -1.14           | -1.15     | -1.41       | 1.09      | -1.02       | 1.88       | 1.23         | 3.74       | 2.43         | 2.22       | 1.81         |
| LIFR         | leukemia inhibitory factor   | chr5p13-p12            | cell surface receptor signaling pathway   | ---                                   | 1.18          | 1.20            | -1.01     | 1.06        | -1.05     | 1.16        | 1.04       | 1.03         | -1.01      | -1.18        | -1.55      | -2.22        |
| LIFR         | leukemia inhibitory factor   | chr5p13-p12            | cell surface receptor signaling pathway   | ---                                   | 2.38          | 2.21            | -1.08     | 1.09        | 1.27      | -1.43       | -2.06      | 1.17         | 1.10       | -1.07        | -1.34      | -2.02        |
| LIG1         | ligase I, DNA, ATP-depende   | chr19q13.2-q13.3       | S phase of mitotic cell cycle             | ---                                   | -1.05         | -1.10           | 1.08      | 1.12        | -1.05     | -1.19       | 1.19       | 1.06         | -1.02      | -1.13        | -1.49      | -1.40        |
| LIG3         | ligase III, DNA, ATP-depe    | chr17q11.2-q12         | DNA replication                           | ---                                   | -1.05         | -1.07           | 1.07      | -1.01       | 1.03      | 1.02        | -1.14      | -1.12        | 1.29       | 1.29         | 1.23       | 1.33         |
| LIG3         | ligase III, DNA, ATP-depe    | chr17q11.2-q12         | DNA replication                           | ---                                   | 1.71          | 1.06            | 1.19      | -2.04       | 1.65      | 1.24        | 1.21       | 1.50         | 3.16       | 1.79         | -1.13      | 1.12         |
| LIG4         | ligase IV, DNA, ATP-depe     | chr13q33-q34           | single strand break repair                | ---                                   | 1.00          | 1.04            | -1.01     | 1.01        | -1.05     | 1.07        | -1.23      | -1.20        | -1.30      | -1.07        | -1.29      | -1.31        |
| LILRA1       | leukocyte immunoglobulin     | chr19q13.4             | defense response                          | ---                                   | -1.84         | 1.76            | -1.43     | -1.69       | 1.85      | 1.01        | 4.58       | 5.53         | 4.54       | 3.13         | -1.31      | -1.40        |
| LILRB2       | leukocyte immunoglobulin     | chr19q13.4             | negative regulation of antigen processing | ---                                   | 2.86          | -1.08           | -1.00     | -2.52       | 3.80      | -1.45       | 1.37       | -1.28        | 1.77       | -1.12        | -1.44      | -2.57        |
| LIMCH1       | LIM and calponin homolog     | chr4p13                | actomyosin structure organization         | ---                                   | 1.10          | 1.12            | 1.04      | 1.01        | -1.03     | 1.03        | 1.05       | -1.05        | 1.11       | 1.18         | 1.36       | 1.24         |
| LIMK1        | LIM domain kinase 1          | chr7q11.23             | protein phosphorylation                   | G13_Signaling_Pathway // GenMAPP      | 1.11          | 1.18            | -1.21     | -1.38       | 1.19      | -1.08       | 1.20       | 1.19         | -1.06      | -1.03        | -1.09      | 1.08         |
| LIMK2        | LIM domain kinase 2          | chr22q12.2             | protein phosphorylation                   | ---                                   | 1.06          | -1.40           | 1.21      | 1.43        | 1.15      | 1.30        | -1.16      | 1.09         | -1.72      | -1.95        | -2.97      | -3.03        |
| LIMK2        | LIM domain kinase 2          | chr22q12.2             | protein phosphorylation                   | ---                                   | -1.03         | -1.00           | 1.06      | 1.24        | 1.20      | -1.01       | -1.00      | 1.26         | -1.35      | -1.65        | -1.62      | -1.53        |
| LIMS1        | LIM and senescent cell anti  | chr2q12.3              | cell aging                                | ---                                   | -1.10         | -1.01           | -1.00     | -1.14       | 1.01      | -1.07       | -1.03      | 1.08         | -1.16      | -1.03        | -1.23      | -1.09        |
| LIN37        | lin-37 homolog (C. elegans)  | chr19q13.1             | mitotic cell cycle                        | ---                                   | -1.13         | -1.21           | 1.08      | 1.11        | -1.03     | -1.05       | 1.11       | 1.16         | 1.51       | 1.05         | 1.55       | 1.79         |
| LINTB        | lin-7 homolog B (C. elegans) | chr19q13.3             | transport                                 | ---                                   | -1.09         | -1.01           | -1.16     | -1.21       | 1.38      | -1.06       | 1.25       | -1.23        | 2.61       | 2.01         | 1.33       | 1.46         |
| LINTC        | lin-7 homolog C (C. elegans) | chr1p14                | transport                                 | ---                                   | 1.30          | 1.22            | 1.01      | -1.00       | -1.01     | -1.07       | 1.35       | 1.24         | 1.11       | 1.13         | 1.32       | 1.12         |
| LIN9         | lin-9 homolog (C. elegans)   | chr1q42.12             | mitotic cell cycle                        | ---                                   | 5.55          | 5.81            | 1.44      | 1.84        | -1.71     | -1.01       | 2.76       | 1.81         | 1.48       | 1.54         | 1.14       | 1.83         |
| LIN9         | lin-9 homolog (C. elegans)   | chr1q42.12             | mitotic cell cycle                        | ---                                   | 1.47          | 1.64            | -1.54     | -1.29       | -1.17     | -1.38       | -2.27      | -1.15        | -1.21      | 1.00         | -1.48      | -1.18        |
| LINC00032    | long intergenic non-protein  | chr9p21                | 0                                         | ---                                   | 3.41          | 6.21            | 2.05      | -1.75       | 1.83      | -1.30       | -3.32      | -1.17        | 1.03       | -1.84        | -1.10      | 1.11         |
| LINC00032    | long intergenic non-protein  | chr9p21                | 0                                         | ---                                   | 3.01          | 1.87            | 1.17      | 1.25        | -1.14     | 1.05        | -1.48      | -1.16        | 1.18       | 1.11         | 1.15       | -1.23        |
| LINC00032    | long intergenic non-protein  | chr9p21                | 0                                         | ---                                   | -1.06         | -1.13           | -2.17     | -1.50       | -1.16     | 1.02        | -1.56      | -2.63        | 2.28       | 3.49         | -2.26      | -1.85        |
| LINC00085    | long intergenic non-protein  | chr19q13.41            | 0                                         | ---                                   | 1.17          | -1.88           | 1.00      | -2.33       | -1.04     | 2.27        | 1.03       | 13.65        | -1.65      | 2.42         | -1.00      | 1.54         |
| LINC00094    | long intergenic non-protein  | chr9q34                | 0                                         | ---                                   | 1.01          | -1.01           | 1.10      | -1.05       | 1.38      | 1.07        | 1.27       | 1.07         | 1.03       | -1.04        | -1.04      | -1.37        |
| LINC00094    | long intergenic non-protein  | chr9q34                | 0                                         | ---                                   | 1.01          | -1.05           | -1.03     | -1.06       | -1.03     | 1.04        | 1.11       | 1.02         | -1.41      | -1.07        | -1.60      | -1.46        |
| LINC00112    | long intergenic non-protein  | chr21q22.3             | 0                                         | ---                                   | 1.80          | 1.05            | -4.67     | -1.28       | 1.42      | 1.10        | -1.40      | 1.86         | 2.18       | 2.55         | -2.01      | -1.10        |
| LINC00115    | long intergenic non-protein  | chr1p36.33             | 0                                         | ---                                   | 1.16          | 1.44            | 1.26      | 1.27        | 1.21      | 1.07        | -1.03      | 1.37         | 1.18       | 1.08         | -1.07      | -1.10        |
| LINC00116    | long intergenic non-protein  | chr2q13                | 0                                         | ---                                   | -1.10         | -1.22           | -1.11     | -1.09       | 1.02      | -1.11       | -1.14      | 1.02         | 1.16       | -1.00        | 1.27       | 1.12         |
| LINC00152 // | long intergenic non-protein  | chr2p11.2 /// chr2q40  | 0                                         | ---                                   | -1.07         | -1.06           | -1.07     | 1.01        | -1.02     | -1.09       | 1.29       | 1.13         | 1.69       | 1.38         | 1.33       | 1.33         |
| LINC00158    | long intergenic non-protein  | chr21q21.3             | 0                                         | ---                                   | -3.17         | -3.90           | 1.09      | -1.25       | -4.03     | -1.56       | 1.64       | 1.13         | 1.47       | -1.08        | 1.39       | 1.08         |
| LINC00162    | long intergenic non-protein  | chr21q22.3             | 0                                         | ---                                   | -1.02         | -1.05           | -1.01     | 1.23        | 1.05      | -1.13       | 1.97       | 1.52         | 1.82       | 1.34         | 1.02       | -1.03        |
| LINC00163    | long intergenic non-protein  | chr21q22.3             | 0                                         | ---                                   | 1.16          | -1.50           | 1.30      | 1.23        | -1.43     | 1.21        | -3.17      | -2.99        | 1.08       | -1.04        | 1.62       | 1.89         |
| LINC00189    | long intergenic non-protein  | chr21q22.11            | 0                                         | ---                                   | -1.18         | -4.37           | -2.06     | -1.15       | -1.38     | -1.70       | -9.02      | -3.76        | -1.03      | 1.03         | 8.36       | 3.33         |
| LINC00263 // | long intergenic non-protein  | chr10q24.31 /// chr5p0 | 0                                         | ---                                   | 1.06          | 1.01            | 1.03      | -1.03       | 1.02      | -1.00       | -1.23      | -1.18        | -1.43      | -1.29        | 1.12       | 1.08         |
| LINC00265    | long intergenic non-protein  | chr7p14.1              | 0                                         | ---                                   | 1.35          | 1.16            | 1.04      | -1.14       | -1.37     | -1.28       | 1.17       | 1.73         | -2.08      | -1.96        | 1.11       | -2.27        |
| LINC00269    | long intergenic non-protein  | chrXq13.1              | 0                                         | ---                                   | 1.44          | -1.14           | -1.06     | 2.43        | -5.18     | -2.69       | -1.01      | 3.46         | 1.68       | -2.31        | 2.00       | 1.94         |
| LINC00290    | long intergenic non-protein  | chr4q34.3              | 0                                         | ---                                   | 2.19          | 1.42            | 1.09      | -1.07       | -1.11     | 1.21        | -1.87      | 1.25         | 1.98       | 1.08         | 3.71       | 6.74         |
| LINC00294    | long intergenic non-protein  | chr1p13                | 0                                         | ---                                   | -1.12         | -1.14           | 1.06      | 1.13        | -1.02     | 1.07        | -1.08      | -1.08        | -1.45      | -1.24        | -1.37      | -1.17        |
| LINC00308    | long intergenic non-protein  | chr21q21.1             | 0                                         | ---                                   | 1.36          | -1.09           | -1.01     | -1.29       | -2.97     | -1.41       | 1.06       | -3.69        | -1.60      | 2.07         | 2.48       | 3.91         |
| LINC00312    | long intergenic non-protein  | chr3p25.3              | 0                                         | ---                                   | 2.22          | 1.17            | 1.54      | 2.00        | -3.59     | -1.61       | 1.61       | -1.42        | 3.76       | 1.87         | -2.71      | -1.81        |
| LINC00319    | long intergenic non-protein  | chr21q22.3             | 0                                         | ---                                   | -1.04         | -1.19           | -1.06     | -1.01       | -1.07     | -1.26       | -1.07      | -1.01        | -1.15      | -1.32        | 2.66       | 3.01         |
| LINC00324    | long intergenic non-protein  | chr17p13.1             | 0                                         | ---                                   | 1.11          | 1.06            | -1.12     | 1.01        | -1.03     | -1.09       | 1.70       | 1.42         | -2.46      | -2.09        | -1.32      | 1.08         |
| LINC00326    | long intergenic non-protein  | chr6q25.2              | 0                                         | ---                                   | 1.45          | 1.41            | 1.17      | 1.20        | -1.11     | -1.77       | -6.30      | -4.72        | 4.74       | 1.75         | 1.31       | -2.55        |
| LINC00328    | long intergenic non-protein  | ---                    | 0                                         | ---                                   | -1.15         | 1.02            | 1.37      | 1.37        | 1.45      | 1.19        | -1.55      | -1.11        | -4.88      | -2.47        | -4.11      | -3.20        |
| LINC00338 // | long intergenic non-protein  | chr17q25.2             | 0                                         | ---                                   | -1.11         | -1.09           | -1.04     | 1.08        | -1.10     | 1.13        | -1.19      | 1.10         | -1.96      | -1.62        | -2.12      | -1.80        |
| LINC00339    | long intergenic non-protein  | chr1p36.12             | 0                                         | ---                                   | 1.23          | 1.25            | 1.32      | 1.06        | 1.44      | 1.10        | -1.20      | -1.25        | -1.77      | -1.94        | -1.64      | -1.61        |

| ID        | Gene Title                  | Chromosomal Location | 1st Gene Ontology Biological Process | Pathway | A2497 30 mins | A2497P' 30 mins | A2497 2 h | A2497P' 2 h | A2497 4 h | A2497P' 4 h | A2497 24 h | A2497P' 24 h | A2497 48 h | A2497P' 48 h | A2497 72 h | A2497P' 72 h |
|-----------|-----------------------------|----------------------|--------------------------------------|---------|---------------|-----------------|-----------|-------------|-----------|-------------|------------|--------------|------------|--------------|------------|--------------|
| LINC00342 | long intergenic non-protein | chr2q11.2            | 0                                    | ---     | 1.42          | -1.24           | 1.13      | 1.21        | 1.39      | 1.44        | -1.34      | -1.24        | -5.34      | -5.52        | -5.65      | -4.57        |
| LINC00348 | long intergenic non-protein | chr13q21.33          | 0                                    | ---     | 1.12          | -1.30           | 1.97      | -2.07       | 1.63      | 2.56        | 12.21      | 7.44         | -1.55      | -1.41        | 1.67       | 1.60         |
| LINC00410 | long intergenic non-protein | chr13q31.3           | 0                                    | ---     | -1.88         | -2.13           | -1.81     | -1.48       | -3.21     | -2.70       | -1.99      | -1.44        | -3.17      | -4.76        | 1.49       | -2.72        |
| LINC00441 | long intergenic non-protein | chr13q14.2           | 0                                    | ---     | 7.64          | 7.94            | -1.13     | -1.02       | 1.53      | 1.58        | 1.06       | 1.81         | 1.94       | -1.05        | 2.11       |              |
| LINC00454 | long intergenic non-protein | ---                  | 0                                    | ---     | -1.01         | 1.05            | -1.23     | -2.63       | -2.39     | -2.25       | -1.50      | 1.36         | 2.36       | -1.42        | 6.17       | 3.52         |
| LINC00460 | long intergenic non-protein | chr13q33.3           | 0                                    | ---     | 1.35          | 3.85            | -2.07     | -1.34       | -1.17     | -2.32       | -2.43      | 2.52         | 14.25      | 11.76        | 12.84      | 8.56         |
| LINC00471 | long intergenic non-protein | chr2q37.1            | 0                                    | ---     | -1.02         | -1.09           | -1.09     | 1.45        | 1.09      | 1.34        | -1.19      | -1.09        | -2.43      | -1.39        | -2.10      | -3.17        |
| LINC00473 | long intergenic non-protein | chr6q27              | transcription, DNA-dependent         | ---     | 1.02          | -1.00           | -1.01     | 1.14        | 1.16      | 1.04        | -1.13      | -1.02        | -1.83      | -1.90        | -1.67      | -1.57        |
| LINC00476 | long intergenic non-protein | chr9q22.32           | 0                                    | ---     | -1.07         | -1.12           | -1.14     | -1.05       | 1.01      | -1.08       | 1.32       | 1.12         | -1.16      | -1.29        | -1.28      | -1.02        |
| LINC00476 | long intergenic non-protein | chr9q22.32           | 0                                    | ---     | 1.22          | 1.47            | 1.23      | 1.15        | -1.27     | 1.08        | -1.09      | -1.07        | -2.97      | -2.64        | -3.17      | -3.99        |
| LINC00478 | long intergenic non-protein | chr21q21.1           | 0                                    | ---     | 1.28          | 1.15            | 1.04      | 1.05        | -1.03     | 1.09        | -1.15      | 1.06         | -2.85      | -1.98        | -4.19      | -2.28        |
| LINC00478 | long intergenic non-protein | chr21q21.1           | 0                                    | ---     | 1.01          | 1.04            | -1.25     | 1.03        | -1.11     | -1.06       | 1.35       | 1.49         | 1.11       | 1.26         | -1.77      | -1.40        |
| LINC00478 | long intergenic non-protein | chr21q21.1           | 0                                    | ---     | 1.43          | 1.53            | 1.01      | -1.35       | -1.63     | 1.02        | -2.34      | 1.07         | -1.08      | -1.71        | -6.06      | -5.28        |
| LINC00486 | long intergenic non-protein | chr2p22.3            | 0                                    | ---     | -2.36         | -3.37           | -1.52     | 1.85        | -15.07    | -1.87       | -5.72      | -1.22        | 2.06       | -1.05        | -1.13      | 1.14         |
| LINC00487 | long intergenic non-protein | chr2p25.2            | 0                                    | ---     | 1.58          | 2.03            | -1.63     | -1.28       | 1.16      | -1.86       | -4.85      | -1.01        | 1.51       | -1.24        | -1.69      | -2.08        |
| LINC00493 | long intergenic non-protein | chr20p11.23          | 0                                    | ---     | -1.03         | -1.04           | 1.03      | 1.00        | 1.05      | -1.03       | 1.08       | 1.03         | 1.21       | 1.07         | 1.32       | 1.24         |
| LINC00494 | long intergenic non-protein | chr20q13.13          | 0                                    | ---     | -1.36         | -1.05           | -1.05     | -1.46       | 1.03      | -1.23       | -2.01      | 1.36         | -1.20      | -1.13        | -7.58      | -3.54        |
| LINC00511 | long intergenic non-protein | chr17q24.3           | 0                                    | ---     | -1.03         | -1.08           | 1.04      | -1.03       | 1.07      | -1.04       | 1.13       | 1.05         | 1.10       | 1.25         | 1.38       | 1.41         |
| LINC00514 | long intergenic non-protein | chr16p13.3           | 0                                    | ---     | 2.81          | 2.21            | -1.72     | 1.08        | -2.62     | -1.02       | -2.73      | -1.70        | 2.67       | 4.51         | 1.16       | 1.28         |
| LINC00515 | long intergenic non-protein | chr21q21.3           | 0                                    | ---     | -1.02         | 1.27            | -1.05     | -1.09       | -1.33     | 1.06        | -1.30      | -1.05        | -1.06      | -1.06        | -1.72      | -1.70        |
| LINC00518 | long intergenic non-protein | chr6p24.3            | 0                                    | ---     | -1.22         | -1.45           | -1.41     | -2.04       | -1.42     | 1.58        | 1.39       | 1.06         | 1.06       | -1.21        | 1.76       | -1.19        |
| LINC00520 | long intergenic non-protein | chr14q22.3           | 0                                    | ---     | 1.22          | 1.41            | -1.21     | 1.23        | -1.36     | 1.26        | -1.34      | 2.21         | 3.57       | 1.79         | 7.03       | 4.41         |
| LINC00521 | long intergenic non-protein | chr14q32.12          | 0                                    | ---     | 1.55          | 1.92            | 1.85      | 2.80        | -1.87     | 1.51        | -1.96      | -4.93        | 1.11       | 1.73         | 2.13       | -1.69        |
| LINC00537 | long intergenic non-protein | chr9q21.11           | 0                                    | ---     | 1.41          | 1.23            | 1.20      | -1.35       | -1.24     | -1.11       | 1.47       | 1.71         | -1.13      | -1.23        | -2.67      | -2.32        |
| LINC00537 | long intergenic non-protein | chr9q21.11           | 0                                    | ---     | 1.57          | 1.17            | -1.23     | -1.17       | 1.17      | 1.08        | 1.03       | 1.15         | -2.07      | -2.37        | -4.54      | -4.58        |
| LINC00537 | long intergenic non-protein | chr9q21.11           | 0                                    | ---     | 1.05          | 1.04            | -1.16     | -1.20       | 1.19      | 1.08        | 1.25       | 1.46         | -1.53      | -1.81        | -1.79      | -1.83        |
| LINC00550 | long intergenic non-protein | chr13q21.33          | 0                                    | ---     | 2.56          | 1.38            | 1.62      | -1.04       | -1.30     | -1.39       | 1.37       | -1.55        | -1.88      | -1.57        | 3.11       | -3.76        |
| LINC00560 | long intergenic non-protein | chr13q31.2           | 0                                    | ---     | 1.26          | -3.94           | 2.01      | 1.00        | -1.10     | 1.78        | 5.33       | -1.82        | 11.40      | 7.70         | 2.21       | 3.14         |
| LINC00589 | long intergenic non-protein | chr8p12              | 0                                    | ---     | -2.18         | -2.44           | -1.71     | 1.29        | -1.13     | 1.22        | -1.35      | 1.02         | 1.31       | -1.11        | 1.53       | 1.20         |
| LINC00592 | long intergenic non-protein | chr12q13.13          | 0                                    | ---     | 1.08          | -1.02           | -1.26     | -1.28       | -1.08     | -1.10       | 1.32       | 1.02         | 2.53       | 1.95         | 5.51       | 4.53         |
| LINC00597 | long intergenic non-protein | chr15q23-q24         | 0                                    | ---     | 1.84          | 1.03            | -1.24     | -1.52       | -1.24     | -1.07       | -1.38      | -1.04        | -1.96      | -1.66        | -1.76      | -1.50        |
| LINC00598 | long intergenic non-protein | chr13q14.11          | 0                                    | ---     | 2.18          | 2.07            | -5.25     | 1.15        | -3.61     | -3.48       | -1.04      | 1.99         | 1.17       | 2.00         | -1.17      | -1.06        |
| LINC00608 | long intergenic non-protein | chr2q35              | 0                                    | ---     | -5.46         | -1.20           | 1.09      | 1.35        | -3.38     | 1.35        | 2.47       | 1.66         | 6.65       | 1.06         | -2.36      | -9.68        |
| LINC00615 | long intergenic non-protein | chr12q21.33          | 0                                    | ---     | -1.41         | -2.68           | -1.23     | -1.90       | -2.15     | -4.34       | -1.19      | -3.10        | 5.69       | 14.52        | -2.22      | 2.40         |
| LINC00620 | long intergenic non-protein | chr3p25.1            | 0                                    | ---     | 1.32          | 1.21            | 1.00      | -1.01       | 1.70      | 1.56        | -2.65      | -3.83        | 1.58       | -1.36        | 4.37       | -1.32        |
| LINC00621 | long intergenic non-protein | chr13q12.12          | 0                                    | ---     | 1.16          | 1.09            | 1.02      | 1.00        | 1.02      | 1.17        | -1.28      | -1.11        | -1.53      | -1.35        | -1.37      | -1.48        |
| LINC00622 | long intergenic non-protein | chr1p12              | 0                                    | ---     | -1.08         | 1.14            | 1.15      | -1.45       | -1.04     | 1.32        | -1.55      | -1.36        | -1.02      | -1.02        | 1.63       | 1.58         |
| LINC00623 | long intergenic non-protein | chr1q21.1            | 0                                    | ---     | 1.58          | 1.34            | 1.12      | -1.01       | 1.01      | -1.02       | 1.03       | 1.00         | -1.40      | -1.62        | -2.03      | -1.70        |
| LINC00623 | long intergenic non-protein | chr1q21.1            | 0                                    | ---     | 1.05          | -1.00           | -1.02     | 1.11        | 1.02      | -1.10       | 1.19       | 1.03         | 1.25       | 1.11         | 1.21       | 1.37         |
| LINC00629 | long intergenic non-protein | ---                  | 0                                    | ---     | 2.57          | 2.34            | -1.18     | -1.22       | -1.90     | 1.88        | 1.15       | -1.26        | 2.72       | 2.93         | 1.01       | 1.60         |
| LINC00630 | long intergenic non-protein | chrXq22.1            | 0                                    | ---     | 1.63          | 1.53            | 1.23      | 1.47        | 1.16      | 1.45        | 1.47       | 1.15         | 2.14       | 2.38         | 1.52       | 1.58         |
| LINC00643 | long intergenic non-protein | chr14q23.2           | 0                                    | ---     | 1.32          | 1.10            | 2.39      | 2.88        | -1.00     | -1.76       | -1.75      | 1.27         | 2.86       | -1.06        | -1.27      | 1.48         |
| LINC00644 | long intergenic non-protein | ---                  | 0                                    | ---     | -11.42        | -3.58           | -7.47     | -5.52       | -4.40     | -3.40       | 1.10       | 1.40         | 2.09       | -1.24        | -4.62      | 1.45         |
| LINC00654 | long intergenic non-protein | chr20p12.3           | 0                                    | ---     | 1.94          | -1.97           | -3.26     | -3.57       | 1.11      | 1.04        | 1.36       | 1.02         | 1.45       | -1.49        | -1.38      | -1.29        |
| LINC00662 | long intergenic non-protein | chr19q11             | 0                                    | ---     | 1.31          | 1.32            | 1.10      | -1.09       | 1.39      | 1.43        | 1.03       | -1.00        | -1.08      | 1.12         | 1.18       | 1.36         |
| LINC00662 | long intergenic non-protein | chr19q11             | 0                                    | ---     | -1.27         | -1.67           | 1.16      | 1.09        | 1.29      | -1.60       | 1.33       | 1.17         | -2.07      | -2.09        | -2.07      | -3.15        |
| LINC00662 | long intergenic non-protein | chr19q11             | 0                                    | ---     | 1.30          | -1.19           | 1.31      | 1.15        | 1.02      | -1.13       | 1.21       | -1.01        | -1.82      | -2.24        | -1.33      | -1.09        |
| LINC00663 | long intergenic non-protein | chr19p13.11          | 0                                    | ---     | -1.70         | 2.86            | -4.44     | -1.41       | -5.57     | -5.54       | 1.12       | 2.03         | 1.11       | -1.70        | 4.66       | 5.36         |
| LINC00667 | long intergenic non-protein | chr18p11.31          | 0                                    | ---     | -1.05         | 1.12            | -1.24     | 1.30        | 1.05      | 1.01        | -1.37      | -1.34        | -2.70      | -2.23        | -2.07      | -1.51        |
| LINC00667 | long intergenic non-protein | chr18p11.31          | 0                                    | ---     | -1.28         | -1.10           | -1.01     | 1.07        | 1.18      | 1.07        | -1.48      | -1.25        | -1.64      | -1.85        | -2.66      | -1.91        |
| LINC00667 | long intergenic non-protein | chr18p11.31          | 0                                    | ---     | -1.16         | -1.16           | 1.12      | 1.07        | 1.09      | 1.03        | -1.07      | -1.20        | -1.39      | -1.33        | -1.20      | -1.13        |
| LINC00667 | long intergenic non-protein | chr18p11.31          | 0                                    | ---     | 1.16          | 1.23            | 1.05      | -1.15       | -1.18     | 1.02        | -1.42      | 1.14         | -2.57      | -2.29        | -2.06      | -2.15        |
| LINC00669 | long intergenic non-protein | chr18q12.2-q12.3     | 0                                    | ---     | 1.18          | -1.04           | 1.00      | 1.08        | 1.05      | -1.00       | -1.08      | -1.17        | -1.32      | -1.29        | 1.25       | 1.04         |
| LINC00672 | long intergenic non-protein | ---                  | 0                                    | ---     | -1.92         | -2.53           | 1.45      | -1.35       | 1.09      | 1.10        | 4.27       | 3.37         | 9.42       | 5.28         | -1.04      | -1.50        |
| LINC00674 | long intergenic non-protein | chr17q24.2           | 0                                    | ---     | 1.09          | -1.02           | 1.16      | 1.29        | -1.01     | 1.06        | -1.00      | -1.02        | -1.60      | -1.46        | -1.38      | -1.26        |
| LINC00674 | long intergenic non-protein | chr17q24.2           | 0                                    | ---     | 1.05          | -1.01           | 1.23      | 1.19        | 1.01      | 1.03        | -1.12      | 1.03         | -1.77      | -1.66        | -1.47      | -1.21        |
| LINC00674 | long intergenic non-protein | chr17q24.2           | 0                                    | ---     | 1.13          | -1.06           | 1.10      | -1.03       | 1.02      | 1.02        | -1.01      | 1.04         | -1.61      | -1.55        | -1.43      | -1.31        |
| LINC00689 | long intergenic non-protein | chr7q36.3            | 0                                    | ---     | -1.12         | -1.03           | 1.19      | 1.13        | -1.22     | -1.13       | -1.32      | -1.22        | -1.24      | -1.09        | -1.29      | -1.42        |
| LINC00689 | long intergenic non-protein | chr7q36.3            | 0                                    | ---     | -1.27         | -1.67           | 1.30      | 1.16        | 1.04      | -1.32       | 1.14       | -1.26        | -1.33      | -1.14        | -1.74      | -2.00        |
| LINC00689 | long intergenic non-protein | chr7q36.3            | 0                                    | ---     | 1.30          | 1.11            | 1.09      | -1.14       | -1.16     | 1.10        | 1.33       | 1.24         | -1.12      | -1.37        | -1.81      | -1.81        |
| LINC00692 | long intergenic non-protein | chr3p24.2            | 0                                    | ---     | 3.63          | -1.15           | 2.58      | -1.88       | 1.23      | 1.62        | -1.78      | -1.38        | 2.35       | 1.91         | -1.39      | 7.22         |
| LINC00836 | long intergenic non-protein | ---                  | 0                                    | ---     | -1.12         | -1.21           | -1.19     | -1.11       | -1.94     | 1.72        | 1.00       | -1.10        | -3.49      | -2.56        | -2.30      | -2.41        |
| LINC00839 | long intergenic non-protein | chr10q11.21          | 0                                    | ---     | 1.82          | 1.22            | -1.09     | 1.08        | -1.19     | -1.07       | 1.11       | 1.11         | 1.23       | 1.52         | -1.36      | 1.01         |
| LINC00842 | long intergenic non-protein | chr10q11.22          | 0                                    | ---     | -1.06         | -1.14           | -1.25     | 1.33        | -1.33     | 1.10        | 1.22       | 1.15         | -1.62      | -1.10        | -3.40      | -2.06        |
| LINC00849 | long intergenic non-protein | ---                  | 0                                    | ---     | 1.07          | 1.04            | 1.12      | 1.01        | 1.00      | -1.04       | 1.00       | 1.07         | -1.85      | -1.82        | -1.94      | -1.93        |
| LINC00862 | long intergenic non-protein | chr1q32.1            | 0                                    | ---     | 1.67          | -1.03           | -1.31     | -1.10       | -2.37     | -1.10       | -1.38      | 1.85         | 1.15       | -1.18        | 1.17       | 1.97         |

| ID         | Gene Title                             | Chromosomal Location | 1st Gene Ontology Biological Process                                 | Pathway                            | A2497 30 mins | A2497P' 30 mins | A2497 2 h | A2497P' 2 h | A2497 4 h | A2497P' 4 h | A2497 24 h | A2497P' 24 h | A2497 48 h | A2497P' 48 h | A2497 72 h | A2497P' 72 h |
|------------|----------------------------------------|----------------------|----------------------------------------------------------------------|------------------------------------|---------------|-----------------|-----------|-------------|-----------|-------------|------------|--------------|------------|--------------|------------|--------------|
| LINC00875  | long intergenic non-protein            | ---                  | 0                                                                    | ---                                | 1.13          | 1.12            | 1.18      | 1.13        | 1.44      | 1.17        | 1.56       | 1.05         | -2.76      | -2.06        | -2.66      | -3.00        |
| LINC00883  | long intergenic non-protein            | chr3q13.12           | 0                                                                    | ---                                | -1.49         | -1.41           | 1.00      | 1.05        | -1.04     | -1.17       | -1.09      | 1.13         | -3.07      | -2.37        | -5.57      | -3.74        |
| LINC00883  | long intergenic non-protein            | chr3q13.12           | 0                                                                    | ---                                | 1.30          | 1.24            | 1.03      | -1.03       | 1.17      | -1.07       | 1.19       | 1.37         | -3.28      | -2.98        | -4.67      | -6.46        |
| LINC00886  | long intergenic non-protein            | chr3q25.31           | 0                                                                    | ---                                | 1.01          | -1.46           | 1.37      | 1.23        | 1.25      | -1.11       | 1.34       | 1.44         | -3.21      | -3.13        | -1.86      | -2.06        |
| LINC00887  | long intergenic non-protein            | chr3q29              | 0                                                                    | ---                                | -1.13         | -1.90           | -13.68    | -2.20       | 1.59      | 3.27        | 2.06       | 1.19         | 2.73       | 3.99         | 4.46       | 4.51         |
| LINC00888  | long intergenic non-protein            | ---                  | 0                                                                    | ---                                | 1.03          | 1.03            | -1.10     | -1.22       | -1.04     | -1.06       | -1.28      | -1.12        | -2.47      | -2.31        | -1.63      | -1.98        |
| LINC00888  | long intergenic non-protein            | ---                  | 0                                                                    | ---                                | 1.23          | 1.01            | -1.00     | 1.23        | -1.10     | -1.09       | -1.08      | 1.33         | -1.75      | -1.79        | -1.90      | -2.04        |
| LINC00889  | long intergenic non-protein            | chrXq26.3            | 0                                                                    | ---                                | 1.16          | 1.06            | -2.22     | -1.10       | 3.95      | 3.02        | 1.53       | -1.57        | 13.71      | 4.36         | 1.88       | 3.20         |
| LINC00894  | long intergenic non-protein            | ---                  | 0                                                                    | ---                                | 1.27          | 2.59            | -1.92     | -1.41       | -1.16     | -1.41       | -2.38      | 1.12         | 1.38       | 1.16         | 2.21       | 5.01         |
| LINC00899  | long intergenic non-protein            | chr22q13.31          | 0                                                                    | ---                                | -1.06         | -1.12           | -1.09     | -1.11       | 1.09      | -1.14       | -1.01      | -1.20        | -1.66      | -1.18        | -1.14      | -1.21        |
| LINC00901  | long intergenic non-protein            | ---                  | 0                                                                    | ---                                | -3.35         | -2.41           | -1.43     | -1.22       | 1.20      | -1.11       | -1.34      | -1.50        | 17.55      | 1.61         | -2.35      | -2.02        |
| LINC00909  | long intergenic non-protein            | chr18q22.3           | 0                                                                    | ---                                | -1.01         | -1.11           | 1.04      | 1.10        | -1.07     | -1.06       | -1.49      | -1.05        | -1.55      | -1.58        | -1.85      | -1.28        |
| LINC00921  | long intergenic non-protein            | chr16p13.3           | transcription, DNA-dependent                                         | ---                                | 1.04          | 1.28            | -1.01     | 1.51        | 1.31      | 1.17        | 1.19       | 1.29         | -1.25      | -1.33        | -1.84      | -1.35        |
| LINC00921  | long intergenic non-protein            | chr16p13.3           | transcription, DNA-dependent                                         | ---                                | -1.10         | -1.09           | -1.03     | 1.05        | 1.08      | -1.08       | 1.13       | 1.19         | 1.46       | 1.29         | 1.34       | 1.50         |
| LINC00942  | long intergenic non-protein            | chr12p13             | 0                                                                    | ---                                | 1.39          | 1.35            | 1.62      | 1.34        | 1.11      | 1.20        | -1.55      | -2.17        | 2.54       | 3.55         | 2.25       | 3.56         |
| LINC00942  | long intergenic non-protein            | chr12p13             | 0                                                                    | ---                                | 1.00          | -1.17           | 1.54      | 1.43        | 1.02      | -1.08       | -2.16      | -2.62        | 1.37       | -1.28        | 1.87       | 2.40         |
| LINC00955  | long intergenic non-protein            | chr4p16.3            | 0                                                                    | ---                                | 4.24          | 2.23            | 1.00      | 2.01        | -1.85     | -1.74       | 3.05       | -1.61        | 9.76       | 3.85         | 1.09       | 2.16         |
| LINC00957  | long intergenic non-protein            | chr7p13              | 0                                                                    | ---                                | 1.61          | 2.02            | -1.06     | -1.10       | -1.90     | 1.01        | -1.12      | 1.20         | -1.68      | -1.94        | -1.32      | -1.68        |
| LINC00957  | long intergenic non-protein            | chr7p13              | 0                                                                    | ---                                | -1.04         | 1.13            | -1.16     | -1.14       | -1.14     | -1.07       | 1.32       | 1.05         | -1.11      | 1.20         | 1.41       | 1.43         |
| LINC00960  | long intergenic non-protein            | chr3p12.3            | 0                                                                    | ---                                | -1.19         | 1.08            | 1.21      | 1.05        | 1.24      | 1.08        | 1.12       | 1.08         | 1.12       | 1.04         | 1.24       | 1.15         |
| LINC00963  | long intergenic non-protein            | ---                  | 0                                                                    | ---                                | -1.03         | 1.01            | 1.06      | 1.02        | 1.14      | 1.08        | 1.27       | -1.08        | -1.08      | 1.03         | 1.18       | 1.40         |
| LINC00963  | long intergenic non-protein            | ---                  | 0                                                                    | ---                                | 1.06          | -1.06           | -1.02     | -1.05       | 1.03      | 1.18        | 1.10       | -1.07        | -1.11      | 1.02         | -1.05      | 1.12         |
| LINC00969  | long intergenic non-protein            | chr3q29              | 0                                                                    | ---                                | -1.40         | -1.90           | 1.14      | 1.81        | -2.83     | -1.31       | -1.02      | 1.01         | -1.28      | -1.43        | -2.29      | -3.33        |
| LINC00969  | long intergenic non-protein            | chr3q29              | electron transport chain                                             | ---                                | -1.04         | -1.31           | 1.01      | 1.21        | 1.11      | -1.03       | 1.13       | 1.17         | -1.80      | -1.66        | -1.93      | -1.35        |
| LINGO2     | leucine rich repeat and Ig domain      | chr9p21.2            | 0                                                                    | ---                                | -1.04         | -1.04           | -1.09     | -1.45       | -1.38     | -1.27       | 1.16       | -1.06        | -1.14      | -1.02        | 1.28       | 1.43         |
| LINS       | lines homolog (Drosophila)             | chr15q26.3           | 0                                                                    | ---                                | 1.06          | -1.02           | 1.36      | 1.14        | 1.12      | 1.19        | 1.17       | -1.05        | 1.42       | 1.36         | 2.28       | 2.29         |
| LIPA       | lipase A, lysosomal acid, class C      | chr10q23.2-q23.3     | cell morphogenesis                                                   | ---                                | -1.12         | -1.07           | 1.01      | -1.04       | 1.03      | 1.00        | 1.13       | 1.06         | 1.06       | 1.14         | -1.14      | -1.13        |
| LIPE-AS1   | LIPE antisense RNA 1                   | ---                  | 0                                                                    | ---                                | -1.30         | -1.15           | 1.15      | 1.02        | -1.03     | -1.09       | -1.53      | 1.13         | 1.11       | 1.10         | -1.39      | -2.11        |
| LIPE-AS1   | LIPE antisense RNA 1                   | ---                  | 0                                                                    | ---                                | -1.05         | -3.12           | -1.07     | 1.52        | 1.55      | 1.41        | -2.88      | 1.09         | 1.75       | -1.28        | 1.88       | 1.80         |
| LIPF       | lipase, gastric                        | chr10q23.31          | malate metabolic process                                             | ---                                | 1.09          | 1.30            | -1.17     | -1.17       | -1.39     | -1.44       | -2.18      | -1.89        | -2.34      | -1.27        | -1.12      | 1.53         |
| LIPG       | lipase, endothelial                    | chr18q21.1           | lipid metabolic process                                              | ---                                | -1.49         | -1.15           | -1.12     | -2.54       | 2.09      | 1.17        | 1.38       | 1.50         | 4.45       | 2.78         | 2.90       | 2.96         |
| LIPH       | lipase, member H                       | chr3q27              | lipid metabolic process                                              | Statin_Pathway_PharmGKB // GenMAPP | 1.12          | 1.04            | 1.16      | 1.03        | -1.02     | 1.05        | -1.13      | -1.09        | 1.47       | 1.35         | -1.06      | -1.07        |
| LL0XNC01-7 | NULL /// NULL                          | ---                  | 0                                                                    | ---                                | 2.29          | 1.89            | 1.28      | 1.53        | 1.22      | 1.34        | -1.54      | -1.63        | -1.53      | -1.20        | -2.09      | -1.26        |
| LL22NC03-N | NULL /// NULL                          | ---                  | 0                                                                    | ---                                | -1.17         | -1.32           | 1.21      | -1.08       | 1.20      | 1.10        | 1.03       | 1.19         | -2.40      | -2.37        | -1.78      | -1.72        |
| LMAN1      | lectin, mannose-binding, 1             | chr18q21.3-q22       | protein folding                                                      | ---                                | -1.16         | -1.37           | -1.04     | 1.11        | 1.23      | 1.13        | 1.18       | 1.88         | -1.41      | 1.35         | 1.56       | 1.41         |
| LMAN1      | lectin, mannose-binding, 1             | chr18q21.3-q22       | protein folding                                                      | ---                                | 1.20          | 1.31            | -1.36     | -1.15       | 1.16      | -1.40       | 1.07       | 1.02         | 1.15       | 1.51         | 1.60       | 1.51         |
| LMAN2      | lectin, mannose-binding 2              | chr5q35.3            | transport                                                            | ---                                | -1.09         | -1.04           | 1.01      | -1.10       | 1.03      | -1.11       | 1.15       | -1.04        | 1.30       | 1.21         | 1.24       | 1.21         |
| LMAN2L     | lectin, mannose-binding 2-L            | chr2q11.2            | protein folding                                                      | ---                                | -1.05         | -1.06           | -1.11     | -1.03       | -1.00     | 1.06        | -1.10      | -1.06        | -1.29      | -1.22        | -1.15      | -1.09        |
| LMBR1      | limb region 1 homolog (mouse)          | chr7q36              | embryonic digit morphogenesis                                        | ---                                | 1.32          | 1.40            | -1.10     | -1.32       | 1.01      | 1.01        | -1.42      | -1.09        | -2.13      | -1.79        | -1.73      | -2.87        |
| LMBR1      | limb region 1 homolog (mouse)          | chr7q36              | embryonic digit morphogenesis                                        | ---                                | 1.08          | 1.03            | 1.04      | -1.12       | 1.05      | -1.17       | -1.06      | -1.23        | -1.59      | -1.40        | -1.31      | -1.86        |
| LMBR1      | limb region 1 homolog (mouse)          | chr7q36              | embryonic digit morphogenesis                                        | ---                                | 1.59          | 1.46            | 1.01      | -1.14       | -1.01     | 1.11        | -1.33      | -1.16        | -1.93      | -1.74        | -1.82      | -2.54        |
| LMBRD1     | LMBR1 domain containing                | chr6q13              | vitamin metabolic process                                            | ---                                | 1.18          | 1.15            | -1.03     | -1.06       | 1.01      | 1.03        | -1.21      | -1.17        | -1.62      | -1.52        | -1.19      | -1.41        |
| LMCD1      | LIM and cysteine-rich domain           | chr3p26-p24          | negative regulation of transcription from RNA polymerase II promoter | ---                                | -1.41         | -1.47           | 1.08      | -1.09       | -1.01     | -1.25       | -1.30      | -1.12        | -2.10      | -2.55        | -2.00      | -2.54        |
| LMCD1      | LIM and cysteine-rich domain           | chr3p26-p24          | negative regulation of transcription from RNA polymerase II promoter | ---                                | -1.14         | -1.03           | 1.06      | -1.09       | 1.22      | 1.03        | -1.06      | -1.03        | -1.96      | -1.74        | -1.54      | -1.50        |
| LMF1       | lipase maturation factor 1             | chr16p13.3           | ER to Golgi vesicle-mediated transport                               | ---                                | -3.31         | -1.33           | -1.60     | 1.05        | -1.95     | -1.05       | -4.36      | 1.40         | 1.44       | 1.20         | 1.20       | 2.36         |
| LMF1       | lipase maturation factor 1             | chr16p13.3           | ER to Golgi vesicle-mediated transport                               | ---                                | -1.45         | -1.16           | -1.74     | -1.29       | 1.03      | 1.12        | 1.03       | 1.09         | 2.16       | 2.26         | -1.19      | -1.07        |
| LMF1       | lipase maturation factor 1             | chr16p13.3           | ER to Golgi vesicle-mediated transport                               | ---                                | -1.64         | -1.04           | 1.02      | 1.20        | 1.59      | 1.16        | 1.10       | 1.42         | 1.94       | 1.44         | 2.21       | 2.05         |
| LMF1       | lipase maturation factor 1             | chr16p13.3           | ER to Golgi vesicle-mediated transport                               | ---                                | -3.38         | -1.58           | 1.39      | -1.45       | -1.22     | -1.37       | 1.10       | 1.11         | 1.56       | 1.34         | 1.72       | 1.81         |
| LMLN       | leishmanolysin-like (metallopeptidase) | chr3q29              | proteolysis                                                          | ---                                | -1.08         | -1.19           | 1.23      | 1.32        | 1.06      | 1.09        | -1.22      | -1.16        | -2.22      | -1.47        | -2.13      | -1.71        |
| LMLN       | leishmanolysin-like (metallopeptidase) | chr3q29              | proteolysis                                                          | ---                                | 1.14          | 1.25            | 1.01      | -1.10       | -1.21     | 1.00        | -1.11      | -1.01        | -2.00      | -1.47        | -1.96      | -1.68        |
| LMLN       | leishmanolysin-like (metallopeptidase) | chr3q29              | proteolysis                                                          | ---                                | 1.15          | 1.21            | 1.21      | 1.01        | -1.12     | -1.14       | -1.40      | -1.19        | -2.20      | -1.62        | -1.87      | -1.94        |
| LMO1       | LIM domain only 1 (rhomboid)           | chr11p15             | negative regulation of transcription from RNA polymerase II promoter | ---                                | 1.18          | 1.02            | 1.16      | -1.04       | -1.32     | -1.07       | -1.35      | -1.33        | -1.50      | -1.42        | 1.03       | 1.16         |
| LMO4       | LIM domain only 4                      | chr1p22.3            | neural tube closure                                                  | ---                                | 1.16          | -1.01           | 1.05      | 1.10        | -1.07     | 1.12        | -1.18      | -1.23        | -1.68      | -1.65        | -1.29      | -1.37        |
| LMO4       | LIM domain only 4                      | chr1p22.3            | neural tube closure                                                  | ---                                | 1.01          | -1.02           | 1.13      | 1.04        | 1.01      | 1.04        | -1.26      | -1.08        | -1.17      | -1.19        | -1.40      | -1.27        |
| LMO4       | LIM domain only 4                      | chr1p22.3            | neural tube closure                                                  | ---                                | -1.04         | -1.01           | -1.08     | -1.22       | 1.08      | -1.11       | 1.19       | -1.03        | -1.27      | 1.04         | -1.41      | -1.36        |
| LMO4       | LIM domain only 4                      | chr1p22.3            | neural tube closure                                                  | ---                                | 1.04          | 1.09            | 1.23      | 1.19        | 1.02      | 1.03        | -1.37      | -1.13        | -1.65      | -1.63        | -1.44      | -1.48        |
| LMO4       | LIM domain only 4                      | chr1p22.3            | neural tube closure                                                  | ---                                | 1.01          | -1.02           | -1.01     | 1.34        | 1.12      | 1.23        | -1.35      | -1.11        | -1.64      | -1.64        | -1.84      | -1.64        |
| LMO7       | LIM domain 7                           | chr13q22.2           | protein ubiquitination                                               | ---                                | -1.09         | -1.03           | 1.08      | -1.09       | 1.05      | 1.01        | 1.25       | 1.07         | 1.25       | 1.08         | 1.66       | 1.43         |
| LMO7       | LIM domain 7                           | chr13q22.2           | protein ubiquitination                                               | ---                                | 1.28          | -1.06           | 1.07      | 1.14        | -1.17     | -1.01       | -1.32      | -1.09        | 1.01       | -1.08        | 1.45       | 1.53         |
| LMOD3      | leiomodin 3 (fetal)                    | chr3p14.1            | 0                                                                    | ---                                | -1.76         | 1.04            | -1.06     | -1.56       | -2.22     | -1.39       | 1.39       | -1.10        | -1.69      | -2.29        | -1.67      | 1.30         |
| LMTK2      | lemur tyrosine kinase 2                | chr7q21.3            | receptor recycling                                                   | ---                                | 1.27          | 1.22            | 1.04      | -1.25       | -1.06     | -1.20       | -1.19      | -1.15        | -1.29      | -1.37        | -1.16      | -1.46        |
| LNPEP      | leucylcystinyl aminopeptidase          | chr5q15              | protein polyubiquitination                                           | ---                                | 1.16          | 1.21            | -1.01     | -1.08       | -1.03     | -1.08       | -1.19      | 1.30         | -1.94      | -1.74        | -2.51      | -2.45        |
| LNPEP      | leucylcystinyl aminopeptidase          | chr5q15              | protein polyubiquitination                                           | ---                                | 1.00          | 1.00            | -1.09     | -1.06       | 1.05      | -1.01       | 1.03       | -1.02        | -1.44      | -1.36        | -1.55      | -1.69        |
| LNPEP      | leucylcystinyl aminopeptidase          | chr5q15              | protein polyubiquitination                                           | ---                                | -1.02         | -1.05           | 1.23      | 1.00        | 1.04      | 1.17        | -1.06      | -1.09        | -1.39      | -1.06        | -1.49      | -1.43        |
| LNX1       | ligand of numb-protein X 1             | chr4q12              | ubiquitin-dependent protein catabolic process                        | ---                                | 1.23          | 1.18            | 1.19      | -1.11       | -1.29     | -1.35       | -1.17      | 1.00         | -2.14      | -1.82        | -2.10      | -1.56        |
| LOC1001267 | uncharacterized LOC1001267             | chr11p15.1           | 0                                                                    | ---                                | -1.27         | -1.17           | -1.09     | -1.13       | -1.02     | 1.09        | 1.04       | 1.32         | -1.37      | -1.25        | -1.77      | -1.70        |

| ID         | Gene Title                         | Chromosomal Location                          | 1st Gene Ontology Biological Process | Pathway                               | A2497 30 mins | A2497P' 30 mins | A2497 2 h | A2497P' 2 h | A2497 4 h | A2497P' 4 h | A2497 24 h | A2497P' 24 h | A2497 48 h | A2497P' 48 h | A2497 72 h | A2497P' 72 h |
|------------|------------------------------------|-----------------------------------------------|--------------------------------------|---------------------------------------|---------------|-----------------|-----------|-------------|-----------|-------------|------------|--------------|------------|--------------|------------|--------------|
| LOC1001278 | uncharacterized LOC1001278         | chr20q12                                      | 0                                    | ---                                   | -1.21         | 2.86            | 3.63      | 5.16        | -3.10     | 1.99        | -6.44      | -3.21        | 22.86      | 13.95        | 2.62       | 4.04         |
| LOC1001281 | four and a half LIM domain 4       | chr3p26.2                                     | 0                                    | ---                                   | 1.49          | 2.70            | -1.06     | 1.02        | -1.03     | -1.37       | -1.40      | 1.17         | 1.92       | 1.09         | 1.38       | -1.64        |
| LOC1001281 | uncharacterized LOC1001281         | chr6p25.1                                     | 0                                    | ---                                   | 1.86          | 2.75            | 1.32      | 3.09        | -1.04     | -1.62       | 1.21       | 1.11         | 1.52       | 1.68         | -2.50      | -1.58        |
| LOC1001285 | uncharacterized LOC1001285         | chrXq22.2                                     | 0                                    | ---                                   | 2.95          | 2.26            | 1.45      | -3.16       | -3.93     | -2.60       | 13.24      | 5.83         | 17.36      | 9.14         | -3.08      | -8.35        |
| LOC1001288 | uncharacterized LOC1001288         | chr7q36.1                                     | 0                                    | ---                                   | 1.28          | 1.31            | 1.20      | 1.10        | -1.32     | 1.06        | 1.05       | 1.31         | -1.36      | -1.31        | -2.18      | -2.12        |
| LOC1001288 | uncharacterized LOC1001288         | chr16q24.3                                    | 0                                    | ---                                   | -1.26         | 1.07            | -1.08     | 1.51        | -1.12     | -1.58       | 1.21       | 2.11         | -1.30      | -1.31        | -1.73      | -2.27        |
| LOC1001291 | uncharacterized LOC1001291         | chr17q23.2                                    | 0                                    | ---                                   | 1.86          | 1.62            | -1.44     | 1.29        | 2.26      | 3.92        | -2.80      | -3.51        | -1.16      | -5.44        | 1.01       | -1.40        |
| LOC1001291 | uncharacterized LOC1001291         | chr6p22.1                                     | 0                                    | ---                                   | 1.60          | 1.19            | -1.19     | -1.16       | -1.22     | 1.08        | -1.17      | -1.03        | -1.12      | -1.00        | -1.95      | -1.71        |
| LOC1001291 | PRO2866                            | chr3p26.3                                     | 0                                    | ---                                   | -1.74         | 2.10            | -1.03     | -1.11       | -2.89     | -2.00       | -1.93      | -2.80        | 1.48       | -1.12        | -1.63      | -1.25        |
| LOC1001293 | chromosome X open reading frame 12 | chr12p13.2                                    | 0                                    | ---                                   | -1.35         | -1.21           | 1.02      | 1.08        | -1.02     | -1.16       | -1.33      | -1.04        | -3.15      | -3.48        | -3.28      | -4.55        |
| LOC1001293 | chromosome X open reading frame 12 | chr12p13.2                                    | 0                                    | ---                                   | 1.10          | 1.13            | 1.16      | 1.25        | -1.43     | -1.13       | -1.89      | -1.28        | -2.93      | -2.54        | -2.28      | -2.37        |
| LOC1001294 | uncharacterized LOC1001294         | chr6p25.1                                     | 0                                    | ---                                   | 1.15          | 1.12            | -1.19     | -1.05       | 1.25      | 1.11        | -1.68      | 1.04         | -1.44      | -1.28        | -1.73      | -1.72        |
| LOC1001295 | uncharacterized LOC1001295         | chr15q26.1                                    | 0                                    | ---                                   | 1.10          | 1.11            | -1.02     | -1.13       | -1.21     | -1.12       | -1.29      | -1.05        | -2.32      | -1.68        | -2.02      | -2.55        |
| LOC1001295 | uncharacterized LOC1001295         | chr6p25.3 response to reactive oxygen species | ---                                  | ---                                   | 6.14          | 4.57            | 1.23      | 1.17        | -1.07     | 1.16        | 12.58      | 4.72         | 18.92      | 10.25        | 10.03      | 5.21         |
| LOC1001295 | uncharacterized LOC1001295         | chr6p25.3 response to reactive oxygen species | ---                                  | ---                                   | 1.29          | 1.41            | 1.27      | -1.21       | 1.21      | 1.02        | 2.07       | 1.11         | 4.73       | 3.02         | 5.06       | 2.77         |
| LOC1001295 | uncharacterized LOC1001295         | chr6p25.3 response to reactive oxygen species | ---                                  | ---                                   | -1.07         | -1.10           | -1.11     | -1.24       | 1.05      | 1.13        | 1.69       | 1.25         | 4.61       | 3.40         | 3.88       | 3.23         |
| LOC1001295 | uncharacterized LOC1001295         | chr6p25.3 response to reactive oxygen species | ---                                  | ---                                   | -1.01         | 1.00            | -1.05     | -1.09       | 1.22      | 1.05        | 1.83       | 1.21         | 4.46       | 2.74         | 4.52       | 4.14         |
| LOC1001295 | uncharacterized LOC1001295         | chr3q21.1                                     | 0                                    | ---                                   | -1.10         | -1.13           | 1.04      | 1.06        | -1.05     | -1.16       | -1.17      | -1.11        | -1.36      | -1.44        | -1.84      | -1.69        |
| LOC1001296 | uncharacterized LOC1001296         | chr7p22.2                                     | 0                                    | ---                                   | 3.73          | 3.34            | -2.07     | -1.20       | 2.71      | -2.11       | 7.17       | 3.90         | 2.49       | 5.34         | 2.62       | 2.11         |
| LOC1001296 | uncharacterized LOC1001296         | chr16q23.2                                    | 0                                    | ---                                   | 5.83          | 5.60            | -1.45     | -1.88       | -1.09     | -1.10       | -1.03      | -1.28        | 1.91       | 1.52         | 1.46       | 1.09         |
| LOC1001298 | uncharacterized LOC1001298         | chr13q22.1                                    | 0                                    | ---                                   | 1.11          | 1.08            | 1.03      | 1.00        | 1.08      | 1.10        | -1.10      | 1.00         | 1.07       | 1.22         | 1.16       | 1.42         |
| LOC1001300 | uncharacterized LOC1001300         | chr16p13.3                                    | 0                                    | ---                                   | -1.19         | -1.21           | 1.15      | 1.29        | -1.01     | -1.10       | 1.24       | -1.07        | -2.52      | -1.74        | -1.83      | -2.40        |
| LOC1001301 | uncharacterized LOC1001301         | chr10q25.2                                    | 0                                    | ---                                   | 1.07          | -1.77           | -1.26     | 1.04        | -1.20     | -1.21       | 1.71       | 1.61         | 1.86       | -1.13        | -3.54      | -1.60        |
| LOC1001302 | uncharacterized LOC1001302         | chr12p13.33                                   | 0                                    | ---                                   | -1.28         | -1.30           | 1.05      | -1.11       | -1.42     | 1.11        | -1.45      | 1.11         | -2.65      | -2.74        | -2.84      | -3.33        |
| LOC1001303 | POTE ankyrin domain family 4       | chr1q43                                       | 0                                    | ---                                   | -2.39         | 2.23            | -1.19     | -2.16       | -2.26     | 1.22        | -1.66      | -1.09        | 2.52       | 1.07         | 1.24       | 1.17         |
| LOC1001303 | uncharacterized LOC1001303         | chr11q13.1                                    | 0                                    | ---                                   | -1.03         | -1.11           | -1.17     | 1.13        | -1.01     | 1.01        | 1.11       | 1.09         | 1.74       | 1.53         | 1.30       | 1.90         |
| LOC1001303 | uncharacterized LOC1001303         | chr17q25.3                                    | 0                                    | ---                                   | 2.00          | 1.06            | 1.69      | 1.37        | -1.23     | -1.38       | 1.22       | 1.27         | -3.17      | -2.16        | -2.64      | -2.29        |
| LOC1001304 | uncharacterized LOC1001304         | chr2p21                                       | 0                                    | ---                                   | 1.48          | 1.82            | 1.05      | 1.03        | 1.15      | -1.04       | -1.31      | -1.01        | 1.57       | 1.20         | 1.69       | 1.79         |
| LOC1001304 | uncharacterized LOC1001304         | chr6p23.3                                     | 0                                    | ---                                   | 1.21          | 1.60            | 2.01      | 2.40        | 1.54      | 2.47        | -1.13      | -1.26        | 2.18       | 1.74         | 2.19       | 1.18         |
| LOC1001305 | uncharacterized LOC1001305         | chr2p21                                       | 0                                    | ---                                   | -1.85         | 1.39            | 1.68      | 1.77        | 2.28      | 1.63        | 2.01       | -1.05        | -1.75      | -3.45        | -3.19      | -2.55        |
| LOC1001307 | uncharacterized LOC1001307         | chr16p11.1                                    | 0                                    | ---                                   | 1.80          | 1.42            | -1.53     | -1.93       | 1.83      | 2.48        | 1.46       | 1.32         | 1.07       | 1.09         | 1.36       | 1.35         |
| LOC1001307 | uncharacterized LOC1001307         | chr7q32.1                                     | 0                                    | ---                                   | 1.26          | 1.96            | -1.61     | -1.94       | 2.42      | 1.53        | -3.16      | -1.03        | -4.62      | -3.85        | -3.63      | -2.21        |
| LOC1001309 | ADAM metalloproteinase 11          | chr8p11.22                                    | 0                                    | ---                                   | 1.09          | -2.14           | 1.34      | -1.02       | 1.31      | -1.22       | -1.26      | 1.38         | 3.56       | -2.13        | 1.02       | 1.73         |
| LOC1001309 | uncharacterized LOC1001309         | chr11q13.2                                    | 0                                    | ---                                   | 1.07          | 1.04            | -1.03     | 1.08        | 1.24      | 1.02        | 1.20       | 1.20         | -1.14      | -1.12        | -1.90      | -1.38        |
| LOC1001309 | uncharacterized LOC1001309         | chr10p12.31                                   | 0                                    | ---                                   | 1.17          | 1.01            | -1.01     | -1.41       | -1.98     | -3.85       | -1.11      | -1.36        | 1.33       | 1.63         | 1.43       | 1.90         |
| LOC1001310 | uncharacterized LOC1001310         | chr6p21.2                                     | 0                                    | ---                                   | -1.52         | -1.04           | -1.10     | 1.33        | -1.26     | -1.51       | 1.30       | 1.23         | 1.02       | -1.16        | 2.09       | -1.04        |
| LOC1001310 | uncharacterized LOC1001310         | chr5q14.1                                     | 0                                    | ---                                   | 1.05          | -1.00           | 1.04      | 1.10        | 1.11      | 1.04        | -1.13      | 1.06         | 1.06       | -1.03        | 1.22       | 1.29         |
| LOC1001315 | uncharacterized LOC1001315         | chr11q21                                      | 0                                    | ---                                   | 1.12          | 1.52            | 1.01      | -1.15       | 1.14      | 1.07        | 1.43       | 1.20         | -1.42      | -1.19        | -2.11      | -1.49        |
| LOC1001316 | uncharacterized LOC1001316         | ---                                           | 0                                    | ---                                   | 3.68          | 2.10            | 1.40      | -5.77       | 1.61      | 1.10        | 2.06       | 1.04         | 3.19       | 1.72         | -2.11      | -1.20        |
| LOC1001316 | uncharacterized LOC1001316         | chr3q21.11                                    | 0                                    | ---                                   | -1.53         | -2.10           | 1.09      | -1.95       | -1.33     | -2.28       | -2.58      | 1.45         | 4.61       | 1.93         | 1.09       | 1.71         |
| LOC1001318 | uncharacterized LOC1001318         | chr1p36.31                                    | 0                                    | ---                                   | -1.71         | -3.45           | -1.99     | -1.79       | 1.49      | 2.74        | -1.42      | 1.57         | -1.69      | 2.28         | 5.22       | 1.46         |
| LOC1001323 | uncharacterized LOC1001323         | chr5p12                                       | 0                                    | ---                                   | 1.02          | 1.13            | -1.08     | -1.37       | -1.35     | 1.08        | -1.21      | -1.19        | -1.96      | -1.58        | -1.91      | -1.57        |
| LOC1001328 | importin 5 pseudogene              | chr19p12                                      | 0                                    | ---                                   | 1.18          | 1.10            | 1.43      | 1.30        | 1.07      | 1.03        | -1.38      | 1.03         | 1.19       | 1.19         | -3.01      | -4.36        |
| LOC1001328 | importin 5 pseudogene              | chr19p12                                      | 0                                    | ---                                   | 1.37          | 1.12            | -1.09     | -1.01       | 1.33      | 1.16        | -1.55      | -1.10        | -1.49      | -2.32        | -1.56      | -1.96        |
| LOC1001328 | PMS2 postmeiotic segregation       | chr7q11.23                                    | 0                                    | ---                                   | -1.05         | -1.35           | 1.14      | 1.26        | -1.08     | -1.08       | -1.11      | 1.09         | 1.23       | 1.26         | 1.12       | 1.34         |
| LOC1001328 | PMS2 postmeiotic segregation       | chr7q11.23                                    | 0                                    | ---                                   | -1.13         | -1.17           | 1.06      | 1.06        | 1.05      | -1.14       | 1.02       | 1.27         | 1.24       | 1.13         | 1.32       | 1.46         |
| LOC1001328 | uncharacterized LOC1001328         | chr8q13.3                                     | 0                                    | ---                                   | -1.02         | -1.00           | 1.27      | -1.03       | 1.08      | -1.00       | -1.06      | -1.02        | 1.73       | 1.86         | 2.08       | 1.94         |
| LOC1001329 | uncharacterized LOC1001329         | chr1q21.1 /// chr1q20                         | 0                                    | ---                                   | -1.24         | -1.24           | 1.03      | 1.09        | 1.12      | -1.04       | 1.35       | 1.34         | 1.20       | 1.09         | 1.13       | 1.36         |
| LOC1001331 | PRO102                             | chr10q11.22                                   | 0                                    | ---                                   | 1.21          | 1.14            | -1.03     | -1.20       | 1.51      | 1.49        | -1.29      | -1.18        | -1.91      | -1.71        | -2.28      | -2.90        |
| LOC1001333 | transient receptor potential       | chr11q13.4                                    | 0                                    | single strand break repair            | -1.10         | -1.38           | 1.15      | 1.09        | -1.18     | 1.01        | 1.06       | 1.10         | -3.02      | -2.51        | -2.32      | -2.25        |
| LOC1001342 | uncharacterized LOC1001342         | chr7q34                                       | 0                                    | ---                                   | 1.03          | 1.18            | -1.11     | -1.06       | -1.24     | -1.31       | 1.42       | 1.04         | 1.09       | 1.31         | 1.53       | 1.76         |
| LOC1001342 | uncharacterized LOC1001342         | chr2p21                                       | 0                                    | ---                                   | 1.43          | 1.40            | -1.28     | -1.43       | -1.72     | -1.29       | 1.03       | -1.00        | 2.36       | 2.72         | 1.90       | 1.71         |
| LOC1001343 | uncharacterized LOC1001343         | ---                                           | 0                                    | ---                                   | 1.12          | -1.03           | -1.00     | 1.21        | -1.41     | -1.22       | 1.43       | 1.23         | 1.37       | 1.41         | 1.20       | 1.49         |
| LOC1001343 | uncharacterized LOC1001343         | chr16p13.3                                    | 0                                    | ---                                   | -1.71         | -1.10           | 3.01      | 1.61        | 1.28      | -1.24       | 1.57       | 1.39         | 2.21       | 2.26         | -3.08      | -1.11        |
| LOC1001344 | uncharacterized LOC1001344         | ---                                           | 0                                    | ---                                   | 1.14          | 1.14            | 1.23      | 1.10        | 1.23      | 1.36        | -1.18      | -1.03        | -1.69      | -1.46        | -1.66      | -1.77        |
| LOC1001349 | uncharacterized LOC1001349         | ---                                           | 0                                    | ---                                   | -1.01         | -1.12           | -1.04     | 1.08        | 1.24      | 1.07        | -1.13      | 1.14         | -1.45      | -1.52        | -1.89      | -1.46        |
| LOC1001446 | uncharacterized LOC1001446         | ---                                           | 0                                    | ---                                   | -1.23         | -1.32           | -1.00     | -1.01       | -1.11     | -1.27       | 1.05       | 1.31         | -1.02      | 1.08         | -2.17      | -1.53        |
| LOC1001909 | uncharacterized LOC1001909         | chr16p12.2                                    | 0                                    | ---                                   | 2.34          | 1.53            | 1.15      | 1.09        | 2.33      | 1.05        | 1.08       | -1.10        | -1.15      | -1.75        | -1.65      | -2.40        |
| LOC1002164 | uncharacterized LOC1002164         | chr2q21.1                                     | 0                                    | ---                                   | 4.33          | 5.69            | -1.26     | -1.05       | -1.14     | 1.01        | -1.04      | -1.34        | -1.27      | 1.02         | -2.69      | -1.48        |
| LOC1002165 | uncharacterized LOC1002165         | chr7q22.3                                     | 0                                    | ---                                   | -1.23         | -1.43           | -1.22     | -1.07       | 1.58      | 1.54        | 1.29       | 1.21         | 2.01       | 1.93         | 1.84       | 2.08         |
| LOC1002165 | uncharacterized LOC1002165         | chr7q22.1                                     | 0                                    | ---                                   | 2.35          | 1.05            | 1.09      | 1.29        | -1.19     | 1.05        | -1.27      | -1.09        | -2.17      | -1.72        | -1.78      | -1.34        |
| LOC1002331 | tektin 4 pseudogene /// MA         | chr21p11.2 /// chr4p                          | 0                                    | microtubule cytoskeleton organization | -1.23         | -1.17           | -1.04     | 1.02        | 1.04      | 1.03        | 1.17       | 1.30         | -1.75      | -1.68        | -1.52      | -1.58        |
| LOC1002331 | tektin 4 pseudogene /// MA         | chr21p11.2 /// chr4p                          | 0                                    | microtubule cytoskeleton organization | -1.22         | -1.42           | 1.08      | 1.31        | -1.10     | -1.10       | 1.04       | 1.20         | 1.47       | 1.25         | 1.21       | 1.25         |
| LOC1002331 | tektin 4 pseudogene /// MA         | chr21p11.2 /// chr4p                          | 0                                    | microtubule cytoskeleton organization | -1.09         | -1.04           | -1.08     | 1.12        | -1.20     | -1.24       | 1.08       | 1.21         | 1.81       | 1.66         | 1.07       | 1.19         |
| LOC1002407 | uncharacterized LOC1002407         | ---                                           | 0                                    | ---                                   | 1.16          | -1.29           | 1.29      | 1.31        | -1.45     | 1.25        | -1.05      | 1.33         | 1.12       | -1.01        | -1.07      | 1.03         |
| LOC1002681 | uncharacterized LOC1002681         | chr5q35.1                                     | 0                                    | ---                                   | 1.02          | -1.80           | 1.20      | 1.28        | -1.18     | -1.16       | 3.21       | 1.73         | 2.29       | 2.78         | 2.23       | 2.85         |

| ID         | Gene Title                                       | Chromosomal Location | 1st Gene Ontology Biological Process | Pathway | A2497 30 mins | A2497P' 30 mins | A2497 2 h | A2497P' 2 h | A2497 4 h | A2497P' 4 h | A2497 24 h | A2497P' 24 h | A2497 48 h | A2497P' 48 h | A2497 72 h | A2497P' 72 h |
|------------|--------------------------------------------------|----------------------|--------------------------------------|---------|---------------|-----------------|-----------|-------------|-----------|-------------|------------|--------------|------------|--------------|------------|--------------|
| LOC1002718 | srm-1 homolog, phosphatidylcholine               | chr16p11.2 /// chr16 | amino acid transmembrane transport   | ---     | -1.81         | -1.16           | 1.09      | 1.37        | -1.06     | 1.46        | -1.32      | 1.04         | 1.07       | -1.21        | 1.12       | 1.28         |
| LOC1002718 | srm-1 homolog, phosphatidylcholine               | chr16p11.2 /// chr16 | phosphorylation                      | ---     | -1.11         | -1.01           | 1.15      | 1.08        | 1.27      | 1.21        | 1.06       | 1.06         | 1.36       | 1.10         | 1.42       | 1.12         |
| LOC1002718 | uncharacterized LOC1002718                       | ---                  | 0                                    | ---     | 1.01          | -1.06           | 1.03      | 1.22        | 1.01      | -1.08       | -1.26      | -1.02        | -1.90      | -1.68        | -1.24      | -1.49        |
| LOC1002722 | uncharacterized LOC1002722                       | ---                  | 0                                    | ---     | 1.00          | -1.85           | 1.21      | 1.01        | 1.59      | 1.34        | 1.07       | 1.04         | -1.97      | -1.69        | -1.75      | -1.26        |
| LOC1002869 | DnaJ (Hsp40) homolog, sulfolobus                 | chr2q37.1            | 0                                    | ---     | 1.56          | 1.82            | -2.08     | -2.75       | -6.52     | -1.42       | -1.02      | 1.40         | 9.42       | 6.05         | 5.57       | 6.36         |
| LOC1002870 | uncharacterized LOC1002870                       | chr8p23.1            | 0                                    | ---     | -1.23         | -1.49           | 1.13      | 1.05        | -1.42     | -1.04       | -2.25      | -1.39        | -1.73      | 1.01         | -3.02      | -3.46        |
| LOC1002870 | uncharacterized LOC1002870                       | chr8p23.1            | 0                                    | ---     | 1.35          | 1.33            | 1.20      | 1.03        | 1.09      | -1.04       | -1.30      | 1.08         | -1.45      | -1.19        | -1.09      | -1.40        |
| LOC1002871 | zinc finger protein 717-like                     | chr3p12.3            | transcription, DNA-dependent         | ---     | 1.18          | -1.50           | -1.20     | 1.53        | 1.62      | 1.22        | -1.22      | 1.03         | -1.78      | -2.63        | -2.86      | -1.51        |
| LOC1002871 | zinc finger protein 717-like                     | chr3p12.3            | transcription, DNA-dependent         | ---     | 1.20          | 1.14            | 1.07      | 1.16        | 1.04      | 1.10        | -1.59      | -1.33        | -1.67      | -1.34        | -1.38      | -1.13        |
| LOC1002872 | cytokine receptor CRL2                           | chr3q25.32           | 0                                    | ---     | 1.48          | 1.60            | 1.59      | 2.27        | 1.05      | -1.02       | 1.17       | 1.33         | -1.18      | -1.17        | -1.48      | -1.47        |
| LOC1002875 | uncharacterized LOC1002875                       | chr17q21.2           | 0                                    | ---     | -1.20         | -1.33           | -1.14     | 1.01        | 1.42      | 1.29        | 1.25       | 1.21         | -1.88      | -1.18        | -2.06      | -1.93        |
| LOC1002875 | uncharacterized LOC1002875                       | chr22q11.21          | 0                                    | ---     | 1.94          | 2.32            | 1.28      | -3.07       | -2.62     | -1.86       | 1.24       | 1.73         | 1.54       | 3.34         | -1.04      | 2.82         |
| LOC1002875 | uncharacterized LOC1002875                       | chr22q11.21          | 0                                    | ---     | -1.06         | -1.87           | -1.34     | 1.28        | 1.23      | -1.13       | 1.28       | -1.03        | 1.77       | 1.35         | 1.36       | 1.87         |
| LOC1002877 | uncharacterized LOC1002877                       | chrXq26.3            | transcription, DNA-dependent         | ---     | -2.65         | -2.29           | 1.23      | -1.05       | 2.44      | 2.24        | 1.39       | 2.74         | -1.14      | 1.04         | 10.58      | 10.46        |
| LOC1002878 | uncharacterized LOC1002878                       | chr11q13.4           | 0                                    | ---     | 1.11          | 1.05            | 1.04      | -1.01       | 1.02      | 1.07        | -1.32      | -1.05        | -1.07      | -1.12        | 1.39       | 1.66         |
| LOC1002881 | uncharacterized LOC1002881                       | chr5p15.33           | 0                                    | ---     | -1.02         | -1.14           | 1.02      | 1.26        | -1.01     | -1.05       | 1.15       | 1.18         | -2.07      | -1.76        | -1.54      | -1.33        |
| LOC1002881 | uncharacterized LOC1002881                       | chr8q24.3            | 0                                    | ---     | -1.06         | -1.06           | -1.08     | -1.07       | 1.02      | -1.06       | 1.07       | 1.13         | 1.22       | 1.18         | 1.25       | 1.26         |
| LOC1002884 | uncharacterized LOC1002884                       | chr19q13.43          | 0                                    | ---     | -1.22         | -1.10           | 1.15      | 1.58        | 1.88      | -1.16       | 1.23       | -1.67        | 1.76       | 1.49         | -1.40      | -2.71        |
| LOC1002886 | OTU domain containing 74                         | chr15q13.2           | 0                                    | ---     | -1.21         | 1.20            | -1.36     | -1.01       | -1.03     | -1.02       | -1.22      | -1.09        | -1.11      | -1.26        | 1.30       | 1.22         |
| LOC1002888 | uncharacterized LOC1002888                       | chr2p25.3            | 0                                    | ---     | -1.13         | -1.08           | -1.14     | 1.05        | -1.04     | -1.12       | 1.07       | 1.01         | -1.15      | -1.26        | -1.58      | -1.60        |
| LOC1002889 | uncharacterized LOC1002889                       | chr2p22.3            | 0                                    | ---     | -1.14         | 1.14            | -1.13     | 1.28        | 1.11      | -1.11       | 1.62       | 1.41         | 1.30       | 1.51         | 2.35       | 1.78         |
| LOC1002889 | uncharacterized LOC1002889                       | chr2p22.3            | 0                                    | ---     | 1.36          | 1.33            | -1.35     | -1.08       | 1.14      | 1.18        | 1.83       | 1.12         | -1.37      | 1.13         | 2.69       | 2.08         |
| LOC1002890 | uncharacterized LOC1002890                       | chr9q34.11           | 0                                    | ---     | 1.11          | -1.10           | 1.10      | 1.32        | 1.13      | -1.04       | -1.08      | 1.06         | -1.82      | -1.98        | -1.54      | -1.27        |
| LOC1002890 | uncharacterized LOC1002890                       | chr16p11.2           | 0                                    | ---     | 1.14          | 1.03            | -1.01     | 1.18        | -1.07     | -1.08       | 1.08       | 1.13         | 1.06       | -1.07        | -1.51      | -1.57        |
| LOC1002890 | protein FRG1-like                                | ---                  | 0                                    | ---     | -1.02         | -1.06           | 1.02      | 1.03        | 1.06      | 1.02        | -1.01      | 1.01         | 1.14       | 1.14         | 1.16       | 1.34         |
| LOC1002890 | protein FRG1-like /// uncharacterized LOC1002890 | chr9q13              | 0                                    | ---     | 1.90          | 1.74            | 2.01      | 1.16        | -2.14     | -1.41       | 1.52       | 1.36         | 1.09       | -1.05        | 1.25       | 1.17         |
| LOC1002891 | transmembrane protein 225                        | chr7q22.1            | 0                                    | ---     | -1.42         | -4.23           | -1.05     | 1.22        | 10.13     | 4.76        | -1.30      | -1.34        | 1.46       | 2.29         | 2.33       | 2.25         |
| LOC1002913 | uncharacterized LOC1002913                       | ---                  | 0                                    | ---     | 1.15          | 1.02            | -1.12     | -1.36       | 1.05      | 1.09        | -1.42      | -1.44        | -2.44      | -3.05        | -2.37      | -2.62        |
| LOC1003107 | uncharacterized LOC1003107                       | chr8q24.3            | 0                                    | ---     | -1.05         | -1.06           | 1.11      | 1.20        | -1.14     | -1.60       | 1.07       | -1.03        | 1.12       | 1.02         | 1.42       | 1.58         |
| LOC1005054 | uncharacterized LOC1005054                       | ---                  | 0                                    | ---     | 2.65          | -1.02           | 1.22      | 1.22        | -2.22     | 1.88        | -1.73      | 1.23         | 2.54       | 1.18         | 2.19       | 1.45         |
| LOC1005054 | uncharacterized LOC1005054                       | chr2q22.3            | 0                                    | ---     | 4.01          | 3.17            | -1.17     | -1.48       | 4.19      | 9.67        | 4.40       | -1.24        | 16.11      | 1.93         | -1.15      | 1.44         |
| LOC1005054 | uncharacterized LOC1005054                       | chr2q22.3            | 0                                    | ---     | 1.77          | 1.01            | -2.74     | -1.62       | -2.26     | -2.18       | -4.46      | 1.06         | 1.61       | 1.04         | 1.57       | 1.77         |
| LOC1005055 | uncharacterized LOC1005055                       | ---                  | 0                                    | ---     | -1.17         | -1.02           | -1.01     | -1.05       | -1.11     | 1.03        | 1.08       | 1.01         | -2.82      | -2.08        | -2.65      | -1.82        |
| LOC1005055 | uncharacterized LOC1005055                       | ---                  | 0                                    | ---     | -1.05         | -1.23           | 1.13      | -1.16       | 1.12      | 1.09        | -2.34      | -1.29        | -3.42      | -3.00        | -2.75      | -2.12        |
| LOC1005055 | uncharacterized LOC1005055                       | chr19p13.2           | transcription, DNA-dependent         | ---     | 1.65          | 1.02            | 1.54      | 3.51        | -1.22     | -1.03       | 1.43       | 2.38         | 1.62       | 1.63         | 1.71       | -1.11        |
| LOC1005055 | uncharacterized LOC1005055                       | ---                  | 0                                    | ---     | -1.07         | -1.05           | -1.02     | 1.05        | 1.22      | 1.01        | 1.15       | 1.06         | -1.08      | -1.00        | -1.45      | -1.12        |
| LOC1005055 | uncharacterized LOC1005055                       | ---                  | 0                                    | ---     | 1.06          | 1.05            | 1.17      | 1.19        | -1.00     | -1.08       | 1.04       | -1.20        | -1.50      | -1.01        | -1.69      | -1.48        |
| LOC1005055 | uncharacterized LOC1005055                       | ---                  | 0                                    | ---     | 1.22          | 1.10            | 1.07      | 1.10        | -1.00     | 1.15        | 1.49       | 1.27         | 3.77       | 2.28         | 3.13       | 2.45         |
| LOC1005056 | uncharacterized LOC1005056                       | chr2p23.3            | 0                                    | ---     | -1.26         | -1.11           | -1.88     | -1.70       | 1.09      | 1.35        | 1.89       | 1.91         | 1.26       | 1.12         | -1.02      | 1.13         |
| LOC1005056 | uncharacterized LOC1005056                       | chr2p23.3            | 0                                    | ---     | 1.06          | -1.12           | -1.16     | 1.12        | -1.34     | 1.02        | -1.39      | -1.33        | 1.35       | 1.53         | 1.05       | 1.28         |
| LOC1005056 | uncharacterized LOC1005056                       | ---                  | 0                                    | ---     | 1.02          | 1.09            | -9.07     | 1.13        | -1.41     | -2.07       | -1.26      | 1.26         | 3.74       | 3.23         | 2.28       | 3.30         |
| LOC1005056 | uncharacterized LOC1005056                       | ---                  | 0                                    | ---     | 1.41          | 1.45            | -1.17     | 1.48        | -2.17     | -1.32       | -1.07      | -1.15        | 1.49       | -1.68        | -1.53      | -1.51        |
| LOC1005057 | uncharacterized LOC1005057                       | ---                  | 0                                    | ---     | 1.67          | 1.41            | 1.10      | 1.02        | -1.06     | 1.03        | 1.09       | -1.14        | -1.03      | 1.40         | 1.15       | 1.80         |
| LOC1005057 | uncharacterized LOC1005057                       | chr2p23              | 0                                    | ---     | 1.03          | -1.03           | -1.74     | -1.77       | 2.81      | 1.67        | -2.22      | -1.12        | -1.14      | 1.15         | 3.52       | 3.11         |
| LOC1005057 | uncharacterized LOC1005057                       | chr3q27.2            | 0                                    | ---     | 1.09          | -1.08           | -1.01     | 1.13        | -1.18     | -1.07       | 1.05       | 1.50         | 2.64       | 2.33         | -1.14      | -1.89        |
| LOC1005057 | uncharacterized LOC1005057                       | ---                  | 0                                    | ---     | 1.10          | 1.16            | 1.02      | -1.00       | 1.05      | 1.00        | -1.06      | -1.07        | -1.17      | -1.15        | 1.13       | 1.04         |
| LOC1005057 | uncharacterized LOC1005057                       | ---                  | 0                                    | ---     | 1.23          | 1.34            | 1.18      | 1.11        | 1.02      | 1.01        | -1.32      | -1.31        | -1.96      | -1.89        | -1.82      | -1.90        |
| LOC1005057 | uncharacterized LOC1005057                       | ---                  | 0                                    | ---     | -1.04         | -1.07           | -1.04     | -1.01       | 1.07      | 1.04        | -1.04      | 1.02         | -1.34      | -1.17        | -1.82      | -1.51        |
| LOC1005057 | uncharacterized LOC1005057                       | ---                  | 0                                    | ---     | 1.00          | -1.07           | -1.08     | 1.10        | -1.03     | -1.00       | -1.16      | -1.01        | -1.28      | -1.20        | -1.70      | -1.42        |
| LOC1005058 | uncharacterized LOC1005058                       | ---                  | 0                                    | ---     | 1.06          | 1.29            | 1.13      | 1.06        | 1.09      | -1.03       | 1.03       | 1.09         | 1.14       | -1.22        | 1.31       | -1.19        |
| LOC1005058 | uncharacterized LOC1005058                       | ---                  | 0                                    | ---     | 1.69          | 10.66           | 1.51      | -3.06       | 6.50      | 2.46        | -3.07      | 1.39         | 1.34       | -1.23        | -2.11      | -5.08        |
| LOC1005059 | uncharacterized LOC1005059                       | ---                  | 0                                    | ---     | -1.89         | -2.08           | -1.49     | 1.26        | 2.17      | 1.46        | -1.02      | -1.04        | 1.14       | 2.14         | -1.02      | 4.66         |
| LOC1005059 | uncharacterized LOC1005059                       | ---                  | 0                                    | ---     | -1.74         | -1.06           | 1.02      | 1.08        | -1.22     | -1.64       | -1.41      | -1.72        | -1.64      | -1.69        | -1.17      | -1.40        |
| LOC1005059 | uncharacterized LOC1005059                       | chr1q23-q24          | 0                                    | ---     | 1.09          | 1.81            | -2.05     | -1.38       | -1.47     | 1.39        | -1.49      | -1.51        | 1.02       | 2.70         | -1.35      | -2.04        |
| LOC1005059 | uncharacterized LOC1005059                       | ---                  | 0                                    | ---     | 1.20          | 1.47            | 3.23      | 4.84        | 1.39      | -1.86       | 2.77       | 1.55         | 29.16      | 33.19        | 7.23       | 8.50         |
| LOC1005059 | uncharacterized LOC1005059                       | ---                  | 0                                    | ---     | -1.13         | 1.18            | -1.21     | 1.04        | -1.32     | -1.41       | -1.04      | -1.10        | -1.37      | -1.72        | -2.18      | -5.84        |
| LOC1005059 | uncharacterized LOC1005059                       | ---                  | 0                                    | ---     | 2.35          | 4.99            | 1.80      | 1.24        | 1.36      | 1.60        | -6.41      | -7.48        | 1.44       | 3.02         | -1.95      | 1.18         |
| LOC1005059 | uncharacterized LOC1005059                       | ---                  | 0                                    | ---     | 4.04          | 2.24            | -1.52     | -2.52       | -2.92     | -3.07       | 2.40       | 2.22         | 3.65       | 4.62         | -1.82      | 1.80         |
| LOC1005059 | uncharacterized LOC1005059                       | chr1q23-q25          | C-terminal protein lipidation        | ---     | -1.05         | -1.00           | 1.14      | -1.01       | -1.09     | 1.05        | -1.22      | -1.35        | -1.48      | -1.40        | -1.16      | -1.08        |
| LOC1005059 | uncharacterized LOC1005059                       | chr1q23-q25          | C-terminal protein lipidation        | ---     | -1.02         | -1.02           | -1.02     | 1.06        | 1.02      | -1.01       | -1.06      | -1.05        | -1.37      | -1.26        | -1.45      | -1.40        |
| LOC1005060 | uncharacterized LOC1005060                       | ---                  | 0                                    | ---     | 1.04          | 1.05            | -1.12     | -1.03       | 1.12      | 1.26        | -1.60      | -1.30        | -3.25      | -2.32        | -2.27      | -2.21        |
| LOC1005060 | uncharacterized LOC1005060                       | ---                  | 0                                    | ---     | 1.11          | 1.02            | -1.19     | 1.08        | 1.01      | 1.06        | -1.02      | 1.02         | -1.61      | -1.63        | -1.52      | -1.49        |
| LOC1005060 | uncharacterized LOC1005060                       | chr2p25              | 0                                    | ---     | -1.05         | -1.07           | -1.03     | 1.02        | 1.11      | 1.01        | -1.00      | 1.01         | -1.29      | -1.39        | -1.21      | -1.23        |
| LOC1005060 | uncharacterized LOC1005060                       | ---                  | 0                                    | ---     | 1.24          | -1.12           | 1.54      | 1.02        | 1.18      | 1.02        | -2.26      | -1.46        | -1.60      | -1.98        | -2.54      | -1.78        |
| LOC1005060 | uncharacterized LOC1005060                       | chr2q11              | 0                                    | ---     | -1.03         | 1.19            | 1.19      | 1.29        | 1.00      | 1.23        | -1.35      | -1.24        | -2.67      | -4.72        | -5.33      | -12.31       |
| LOC1005060 | uncharacterized LOC1005060                       | ---                  | 0                                    | ---     | -1.05         | 1.05            | -1.30     | 1.03        | 1.02      | -1.18       | 1.22       | -1.03        | -1.05      | -1.09        | -1.17      | -1.08        |

| ID         | Gene Title                                      | Chromosomal Location         | 1st Gene Ontology Biological Process   | Pathway                                 | A2497 30 mins | A2497P' 30 mins | A2497 2 h | A2497P' 2 h | A2497 4 h | A2497P' 4 h | A2497 24 h | A2497P' 24 h | A2497 48 h | A2497P' 48 h | A2497 72 h | A2497P' 72 h |
|------------|-------------------------------------------------|------------------------------|----------------------------------------|-----------------------------------------|---------------|-----------------|-----------|-------------|-----------|-------------|------------|--------------|------------|--------------|------------|--------------|
| LOC1005061 | uncharacterized LOC1005061                      | ---                          | 0                                      | ---                                     | -1.25         | 1.06            | 1.18      | 1.15        | 1.01      | 1.49        | -1.72      | -1.23        | -2.44      | -1.53        | -4.40      | -5.48        |
| LOC1005061 | uncharacterized LOC1005061                      | ---                          | 0                                      | ---                                     | -1.02         | -1.06           | 1.01      | 1.18        | 1.04      | 1.01        | -1.02      | -1.11        | 1.31       | 1.26         | 1.25       | 1.32         |
| LOC1005061 | uncharacterized LOC1005061                      | ---                          | 0                                      | ---                                     | -1.04         | 1.29            | -1.21     | -1.13       | 1.43      | 1.07        | 1.05       | 1.19         | -3.54      | -3.14        | -4.38      | -5.81        |
| LOC1005061 | uncharacterized LOC1005061                      | ---                          | 0                                      | ---                                     | -1.12         | -1.45           | 1.26      | 1.15        | 1.09      | -1.14       | 1.22       | 1.04         | -1.29      | -1.03        | 1.85       | 1.62         |
| LOC1005062 | uncharacterized LOC1005062                      | ---                          | 0                                      | ---                                     | -1.07         | 1.17            | 1.13      | 1.02        | -1.13     | 1.18        | 1.43       | 1.34         | -1.98      | -1.72        | -1.10      | 1.01         |
| LOC1005062 | prothymosin alpha-like /// chr2q37.1 /// chr9q2 | transcription, DNA-dependent | ---                                    | ---                                     | -1.03         | -1.03           | -1.15     | -1.09       | -1.19     | -1.03       | -1.01      | -1.12        | 1.18       | 1.17         | -1.09      | -1.12        |
| LOC1005062 | uncharacterized LOC1005062                      | ---                          | 0                                      | ---                                     | -4.12         | -3.32           | -2.24     | -1.96       | 3.89      | 1.55        | -2.16      | -3.13        | 4.27       | 1.06         | 6.56       | 1.68         |
| LOC1005062 | uncharacterized LOC1005062                      | ---                          | 0                                      | ---                                     | 1.13          | -1.18           | 1.11      | 1.10        | 1.04      | 1.18        | -1.01      | -1.53        | -1.79      | -1.74        | -1.68      | -1.57        |
| LOC1005062 | uncharacterized LOC1005062                      | ---                          | 0                                      | ---                                     | 1.01          | -1.09           | -1.04     | -1.17       | 1.04      | -1.08       | -1.35      | -1.24        | -2.33      | -1.49        | -2.49      | -2.02        |
| LOC1005063 | uncharacterized LOC1005063                      | ---                          | 0                                      | ---                                     | -1.23         | -1.10           | -1.08     | -1.01       | 1.25      | 1.10        | -1.19      | -1.07        | -2.90      | -2.23        | -2.62      | -2.30        |
| LOC1005063 | uncharacterized LOC1005063                      | ---                          | 0                                      | ---                                     | 1.44          | 1.69            | 1.05      | 1.33        | 2.07      | 1.27        | -1.13      | 1.28         | -2.50      | -2.79        | 1.36       | -1.30        |
| LOC1005063 | uncharacterized LOC1005063                      | chr14q11.1 /// chr22p        | ---                                    | ---                                     | 1.20          | 1.11            | 1.06      | 1.01        | 1.12      | 1.10        | -1.41      | -1.13        | -2.12      | -1.90        | -2.04      | -2.45        |
| LOC1005063 | uncharacterized LOC1005063                      | ---                          | 0                                      | ---                                     | 1.06          | -1.04           | -1.13     | -1.07       | 1.21      | 1.07        | 1.05       | -1.04        | -1.59      | -1.67        | -1.02      | -1.22        |
| LOC1005063 | uncharacterized LOC1005063                      | ---                          | 0                                      | ---                                     | 1.06          | 1.05            | 1.04      | 1.14        | -1.13     | -1.12       | 1.04       | 1.19         | -2.52      | -2.26        | -1.95      | -2.24        |
| LOC1005063 | uncharacterized LOC1005063                      | ---                          | 0                                      | ---                                     | 1.01          | -1.04           | -1.01     | -1.04       | 1.03      | 1.10        | -1.29      | -1.06        | 1.73       | 1.43         | 1.73       | 1.97         |
| LOC1005063 | uncharacterized LOC1005063                      | ---                          | 0                                      | ---                                     | -1.29         | -1.04           | -1.45     | -1.01       | -1.28     | 1.03        | -1.43      | -1.54        | -2.24      | -1.14        | -1.94      | -1.29        |
| LOC1005063 | uncharacterized LOC1005063                      | chr1p13-p12                  | 0                                      | ---                                     | -1.04         | 1.04            | 1.08      | 1.17        | 1.03      | 1.08        | -1.32      | -1.06        | -2.68      | -1.54        | -1.47      | -1.07        |
| LOC1005063 | uncharacterized LOC1005063                      | chr1p13-p12                  | 0                                      | ---                                     | 1.36          | 1.17            | 1.03      | -1.12       | 1.44      | 1.24        | -1.06      | -1.25        | 1.26       | 1.10         | 2.32       | 2.06         |
| LOC1005064 | uncharacterized LOC1005064                      | chr21q22.3                   | skeletal system development            | ---                                     | -1.20         | 1.13            | -1.37     | -1.24       | -1.09     | -1.05       | -2.08      | -1.25        | 2.06       | 2.03         | 2.79       | 3.11         |
| LOC1005064 | uncharacterized LOC1005064                      | chr21q22.3                   | skeletal system development            | ---                                     | -1.02         | -1.05           | -1.04     | -1.03       | 1.03      | 1.03        | 1.05       | 1.11         | -1.03      | 1.03         | -1.29      | -1.15        |
| LOC1005064 | uncharacterized LOC1005064                      | chr21q22.3                   | skeletal system development            | ---                                     | 1.47          | 1.43            | 1.08      | 1.71        | -1.25     | -1.44       | 1.72       | 1.47         | 3.13       | 2.92         | 4.89       | 6.01         |
| LOC1005064 | uncharacterized LOC1005064                      | chr21q22.3                   | skeletal system development            | ---                                     | -1.31         | -1.17           | -1.19     | 1.54        | -1.43     | -1.20       | 5.80       | 2.84         | 2.57       | 1.13         | 3.01       | 2.73         |
| LOC1005064 | uncharacterized LOC1005064                      | chr21q22.3                   | skeletal system development            | ---                                     | -1.14         | -1.01           | -1.32     | 1.27        | 1.14      | -1.27       | 4.15       | 3.18         | 17.03      | 15.84        | 1.33       | 1.59         |
| LOC1005064 | uncharacterized LOC1005064                      | chr21q22.3                   | skeletal system development            | ---                                     | 1.07          | 1.17            | 1.17      | 1.33        | -1.96     | 1.23        | 1.65       | 1.20         | 2.70       | 1.94         | 2.16       | 2.43         |
| LOC1005064 | uncharacterized LOC1005064                      | chr21q22.3                   | skeletal system development            | ---                                     | -1.40         | -2.21           | 1.09      | 1.06        | -1.54     | -1.22       | -1.11      | -1.27        | 1.75       | 1.88         | 3.26       | 2.68         |
| LOC1005064 | uncharacterized LOC1005064                      | chr2q12                      | 0                                      | ---                                     | 1.29          | 1.35            | -3.98     | -2.71       | 1.16      | 1.13        | -1.47      | -1.39        | 5.67       | 4.74         | -2.06      | -2.06        |
| LOC1005064 | uncharacterized LOC1005064                      | chrXp22.33                   | 0                                      | ---                                     | -1.26         | -1.13           | 1.08      | 1.18        | 1.27      | 1.05        | 1.26       | -1.01        | -2.41      | -2.15        | -1.88      | -2.23        |
| LOC1005064 | uncharacterized LOC1005064                      | ---                          | 0                                      | ---                                     | -1.07         | 1.20            | 1.44      | 1.18        | 1.21      | -1.18       | 1.12       | 1.35         | -1.61      | -1.63        | -1.30      | -1.08        |
| LOC1005064 | uncharacterized LOC1005064                      | ---                          | 0                                      | ---                                     | -1.09         | -1.01           | -1.07     | -1.03       | -1.06     | 1.02        | -1.26      | -1.01        | 1.05       | 1.02         | 1.05       | 1.24         |
| LOC1005064 | uncharacterized LOC1005064                      | ---                          | 0                                      | ---                                     | -1.31         | -1.81           | 1.74      | 1.94        | 3.33      | 5.82        | -1.18      | -2.24        | 5.35       | 1.89         | -2.05      | -4.57        |
| LOC1005064 | uncharacterized LOC1005064                      | ---                          | 0                                      | ---                                     | 1.06          | -1.11           | -1.36     | 1.56        | 1.22      | -1.09       | 1.69       | 1.52         | -2.46      | -2.67        | -8.30      | -3.48        |
| LOC1005065 | uncharacterized LOC1005065                      | ---                          | 0                                      | ---                                     | -1.66         | -1.34           | 1.55      | 1.21        | 1.00      | -1.04       | 2.36       | 1.06         | 2.02       | -1.05        | -1.17      | -2.06        |
| LOC1005065 | uncharacterized LOC1005065                      | chr8q22.1                    | biosynthetic process                   | ---                                     | -3.39         | -1.12           | -1.08     | 2.00        | 1.18      | 1.63        | -2.52      | 1.30         | -1.28      | 1.25         | -2.91      | -3.02        |
| LOC1005065 | uncharacterized LOC1005065                      | chr8q22.1                    | biosynthetic process                   | ---                                     | -1.07         | 1.05            | -1.15     | 1.35        | 1.00      | -1.04       | -1.55      | -1.63        | -4.51      | -4.37        | 1.23       | -1.81        |
| LOC1005065 | uncharacterized LOC1005065                      | chr8q22.1                    | biosynthetic process                   | ---                                     | -1.03         | -1.08           | -1.00     | 1.03        | -1.01     | 1.03        | -1.12      | -1.02        | -1.29      | -1.50        | -1.01      | 1.09         |
| LOC1005065 | uncharacterized LOC1005065                      | ---                          | 0                                      | ---                                     | 1.15          | -1.44           | -2.04     | -1.28       | -9.68     | -1.33       | -1.71      | 1.03         | 4.51       | 3.35         | 1.95       | 3.31         |
| LOC1005065 | uncharacterized LOC1005065                      | chr5p13                      | nuclear-transcribed mRNA catabolic pro | Ribosomal_Proteins // GenMAPP /// Ribos | -1.20         | -1.10           | 1.08      | 1.08        | 1.06      | -1.01       | 1.16       | 1.05         | 1.30       | 1.15         | 1.33       | 1.43         |
| LOC1005065 | uncharacterized LOC1005065                      | chr5p13                      | nuclear-transcribed mRNA catabolic pro | Ribosomal_Proteins // GenMAPP /// Ribos | -1.17         | -1.34           | -1.12     | -1.06       | 1.14      | 1.03        | 1.12       | 1.04         | 1.08       | -1.02        | 1.63       | 1.54         |
| LOC1005065 | uncharacterized LOC1005065                      | chr5p13                      | nuclear-transcribed mRNA catabolic pro | Ribosomal_Proteins // GenMAPP /// Ribos | -1.00         | -1.01           | 1.25      | -1.05       | -1.09     | 1.12        | -1.33      | -1.18        | -1.88      | -1.99        | -1.96      | -1.88        |
| LOC1005066 | uncharacterized LOC1005066                      | chr5p12                      | 0                                      | ---                                     | 1.18          | -1.31           | 1.09      | 1.07        | -1.40     | -1.02       | -1.36      | -1.17        | -1.03      | -1.73        | -2.14      | ---          |
| LOC1005066 | uncharacterized LOC1005066                      | ---                          | 0                                      | ---                                     | -1.09         | -1.06           | 1.10      | 1.09        | 1.13      | 1.22        | -1.59      | -1.20        | -3.30      | -2.86        | -4.12      | -2.96        |
| LOC1005066 | uncharacterized LOC1005066                      | ---                          | 0                                      | ---                                     | 1.27          | 1.11            | -1.03     | -1.20       | -1.03     | 1.06        | -1.08      | -1.00        | -2.97      | -2.17        | -2.99      | -4.13        |
| LOC1005066 | uncharacterized LOC1005066                      | ---                          | 0                                      | ---                                     | -1.18         | -1.02           | 1.13      | 1.10        | -1.04     | -1.05       | -1.01      | -1.11        | -2.23      | -2.78        | -1.35      | -1.34        |
| LOC1005067 | endogenous Bornavirus-like                      | chr9p13.2                    | 0                                      | ---                                     | 1.42          | 1.48            | -1.19     | -1.33       | -1.07     | -1.11       | -1.08      | -1.17        | -1.06      | -1.06        | 1.20       | -1.21        |
| LOC1005067 | uncharacterized LOC1005067                      | ---                          | 0                                      | ---                                     | 1.45          | 1.00            | -1.07     | 1.41        | -1.09     | -1.18       | -1.38      | -1.14        | -2.26      | -1.80        | -3.38      | -4.78        |
| LOC1005067 | uncharacterized LOC1005067                      | ---                          | 0                                      | ---                                     | -1.07         | -1.14           | -1.00     | -1.21       | 1.09      | -1.09       | 1.49       | 1.21         | -1.48      | -1.79        | -1.18      | -1.38        |
| LOC1005067 | uncharacterized LOC1005067                      | chr1p36                      | 0                                      | ---                                     | 2.01          | 1.74            | -1.06     | -1.09       | -1.18     | -1.29       | -1.16      | -1.11        | -2.60      | -1.77        | -1.81      | -1.80        |
| LOC1005067 | uncharacterized LOC1005067                      | ---                          | 0                                      | ---                                     | 1.44          | -1.04           | -2.51     | -2.68       | 2.15      | -3.15       | 6.41       | 18.34        | -2.33      | -4.06        | 5.26       | 7.11         |
| LOC1005067 | uncharacterized LOC1005067                      | ---                          | 0                                      | ---                                     | 1.38          | 1.30            | 1.21      | 1.15        | -1.08     | 1.11        | -1.19      | -1.12        | -1.98      | -1.52        | -1.65      | -1.76        |
| LOC1005067 | uncharacterized LOC1005067                      | chr1q42-q43                  | 0                                      | ---                                     | -2.18         | 2.41            | 1.09      | 3.48        | -3.90     | 1.08        | -4.37      | 1.60         | -1.46      | -1.32        | 6.68       | 10.34        |
| LOC1005067 | uncharacterized LOC1005067                      | ---                          | 0                                      | ---                                     | -1.20         | -1.28           | 1.04      | 1.56        | 1.04      | -1.06       | 1.06       | 1.33         | -1.86      | -3.04        | -1.77      | -1.05        |
| LOC1005068 | uncharacterized LOC1005068                      | ---                          | 0                                      | ---                                     | 1.44          | -1.10           | -1.74     | -5.44       | -1.00     | 1.11        | -1.92      | 1.94         | 1.31       | -1.46        | 3.11       | 4.01         |
| LOC1005068 | uncharacterized LOC1005068                      | ---                          | 0                                      | ---                                     | 1.50          | 1.55            | 1.14      | -1.15       | 1.57      | 1.33        | -2.22      | -1.66        | -4.10      | -3.87        | -3.85      | -3.59        |
| LOC1005068 | uncharacterized LOC1005068                      | ---                          | 0                                      | ---                                     | -1.04         | 1.03            | -1.09     | -1.13       | -1.15     | -1.12       | -1.22      | -1.11        | -3.95      | -2.25        | -3.41      | -3.08        |
| LOC1005068 | uncharacterized LOC1005068                      | ---                          | 0                                      | ---                                     | 1.03          | 1.59            | 1.22      | 1.36        | -1.44     | -1.27       | -1.46      | 2.01         | -1.29      | 1.01         | -1.89      | -2.37        |
| LOC1005068 | uncharacterized LOC1005068                      | ---                          | 0                                      | ---                                     | -3.22         | -2.44           | -1.33     | -1.22       | -1.08     | -1.97       | -2.53      | 1.65         | 6.97       | 5.09         | 1.56       | 3.57         |
| LOC1005068 | uncharacterized LOC1005068                      | ---                          | 0                                      | ---                                     | -1.52         | -1.17           | -1.24     | 1.15        | -1.07     | -1.38       | -1.09      | 1.72         | 1.82       | 1.24         | 1.72       | 1.48         |
| LOC1005068 | uncharacterized LOC1005068                      | ---                          | 0                                      | ---                                     | 1.17          | -1.25           | 1.56      | 2.25        | -1.18     | 1.51        | -1.75      | 1.19         | 2.11       | 2.87         | 4.42       | 2.35         |
| LOC1005069 | putative POM121-like protein                    | chr5q13.2 /// chr5q20        | 0                                      | ---                                     | 1.46          | 1.50            | 1.06      | -1.08       | -1.23     | 1.14        | -1.31      | -1.01        | -2.27      | -1.68        | -1.87      | -1.82        |
| LOC1005069 | uncharacterized LOC1005069                      | ---                          | 0                                      | ---                                     | 1.03          | -1.09           | -2.48     | -1.09       | 1.55      | 1.06        | -1.66      | 1.60         | 3.48       | 1.25         | 1.41       | -1.45        |
| LOC1005069 | uncharacterized LOC1005069                      | ---                          | 0                                      | ---                                     | 1.03          | -1.02           | -1.02     | -1.05       | 1.02      | 1.03        | -1.27      | -1.11        | -1.55      | -1.27        | -2.28      | -2.02        |
| LOC1005069 | uncharacterized LOC1005069                      | chr15q11.2                   | 0                                      | ---                                     | 1.29          | 1.23            | 1.15      | -1.07       | -1.10     | 1.06        | -1.44      | -1.12        | -2.61      | -1.84        | -1.69      | -1.80        |
| LOC1005069 | uncharacterized LOC1005069                      | chr15q11.2                   | RNA splicing                           | mRNA_processing_binding_Reactome // Ge  | -1.04         | 1.04            | -1.01     | -1.01       | 1.02      | -1.01       | -1.09      | -1.01        | -1.15      | -1.04        | 1.23       | 1.30         |
| LOC1005069 | uncharacterized LOC1005069                      | ---                          | 0                                      | ---                                     | 1.08          | 1.09            | 1.16      | 1.24        | 1.03      | 1.16        | -1.63      | -1.15        | -3.91      | -3.43        | -3.22      | -2.84        |
| LOC1005069 | uncharacterized LOC1005069                      | ---                          | 0                                      | ---                                     | 1.47          | 1.39            | -1.22     | 1.08        | 1.29      | 1.25        | -1.75      | -1.62        | -3.72      | -3.52        | -2.90      | -2.89        |
| LOC1005070 | uncharacterized LOC1005070                      | ---                          | 0                                      | ---                                     | 1.54          | 2.68            | 1.18      | 1.27        | -1.20     | -1.09       | -1.49      | -1.37        | 1.11       | -1.01        | -2.15      | -1.71        |

| ID         | Gene Title                  | Chromosomal Location | 1st Gene Ontology Biological Process       | Pathway                                    | A2497 30 mins | A2497P' 30 mins | A2497 2 h | A2497P' 2 h | A2497 4 h | A2497P' 4 h | A2497 24 h | A2497P' 24 h | A2497 48 h | A2497P' 48 h | A2497 72 h | A2497P' 72 h |
|------------|-----------------------------|----------------------|--------------------------------------------|--------------------------------------------|---------------|-----------------|-----------|-------------|-----------|-------------|------------|--------------|------------|--------------|------------|--------------|
| LOC1005070 | uncharacterized LOC1005070  | ---                  | 0                                          | ---                                        | -1.26         | -1.06           | -1.73     | -1.02       | 1.69      | 1.84        | 1.06       | -1.56        | 2.72       | 1.64         | 4.22       | 3.78         |
| LOC1005070 | uncharacterized LOC1005070  | ---                  | 0                                          | ---                                        | -1.15         | -1.26           | 1.48      | 1.63        | 1.07      | -1.21       | -1.57      | -1.03        | -2.50      | -2.10        | -1.70      | -1.33        |
| LOC1005070 | uncharacterized LOC1005070  | ---                  | 0                                          | ---                                        | -4.66         | -1.13           | -1.72     | -2.63       | 2.35      | 3.71        | 7.29       | 5.93         | 7.19       | 1.20         | 3.42       | 2.61         |
| LOC1005071 | uncharacterized LOC1005071  | ---                  | 0                                          | ---                                        | 1.04          | -1.23           | -1.02     | -1.40       | 1.55      | 1.41        | 1.12       | 1.13         | -1.39      | -1.91        | -1.44      | 1.01         |
| LOC1005071 | uncharacterized LOC1005071  | chr2q33              | 0                                          | ---                                        | -1.01         | 1.21            | -1.41     | -5.24       | 1.18      | 1.01        | 1.09       | -1.40        | 2.36       | 1.52         | -1.09      | 1.10         |
| LOC1005071 | uncharacterized LOC1005071  | ---                  | 0                                          | ---                                        | -1.22         | -1.39           | 1.27      | 1.37        | 1.06      | -1.27       | 1.10       | 1.31         | 5.30       | 3.59         | 8.28       | 5.85         |
| LOC1005072 | uncharacterized LOC1005072  | ---                  | 0                                          | ---                                        | 5.53          | 5.51            | -3.83     | -1.03       | -13.06    | -2.92       | 2.05       | 2.31         | -1.90      | -2.79        | 1.81       | 3.41         |
| LOC1005072 | uncharacterized LOC1005072  | ---                  | 0                                          | ---                                        | -2.46         | -2.63           | 2.10      | 1.52        | 1.65      | -1.04       | 1.04       | -2.73        | -1.49      | -1.94        | 1.37       | 2.29         |
| LOC1005072 | uncharacterized LOC1005072  | ---                  | 0                                          | ---                                        | 1.10          | -1.14           | -1.15     | -1.53       | -1.09     | 1.01        | 1.34       | 1.02         | -1.89      | -2.19        | -2.29      | -2.48        |
| LOC1005072 | uncharacterized LOC1005072  | ---                  | 0                                          | ---                                        | -4.11         | -4.22           | 1.73      | 2.31        | -3.42     | -2.12       | 2.89       | 2.73         | 2.81       | 2.12         | -1.76      | -1.21        |
| LOC1005072 | uncharacterized LOC1005072  | ---                  | 0                                          | ---                                        | -1.30         | 1.21            | -1.32     | -1.36       | -1.20     | 1.74        | -2.93      | 1.66         | 2.90       | 2.30         | -1.23      | -3.59        |
| LOC1005073 | uncharacterized LOC1005073  | ---                  | 0                                          | ---                                        | -1.23         | -1.15           | -1.16     | -1.11       | -1.01     | -1.11       | 1.16       | 1.03         | -1.32      | -1.29        | -1.39      | -1.36        |
| LOC1005073 | uncharacterized LOC1005073  | ---                  | 0                                          | ---                                        | -1.02         | -1.06           | 1.10      | 1.26        | 1.09      | 1.12        | -1.15      | 1.13         | -1.81      | -1.80        | -1.37      | -1.26        |
| LOC1005073 | uncharacterized LOC1005073  | ---                  | 0                                          | ---                                        | -1.04         | -1.36           | -1.04     | 1.20        | 1.39      | 1.57        | 1.14       | 1.00         | 1.77       | 1.84         | 1.74       | 2.27         |
| LOC1005073 | uncharacterized LOC1005073  | ---                  | 0                                          | ---                                        | -1.13         | -1.24           | 1.34      | 1.41        | 1.36      | 1.07        | 1.32       | 1.42         | -1.35      | -1.40        | -1.98      | -1.63        |
| LOC1005073 | uncharacterized LOC1005073  | ---                  | 0                                          | ---                                        | 1.40          | 1.31            | 1.07      | 1.57        | -2.12     | -1.79       | -2.62      | -1.37        | 3.39       | 2.05         | 1.42       | -1.28        |
| LOC1005073 | uncharacterized LOC1005073  | ---                  | 0                                          | ---                                        | 1.02          | 1.11            | 1.40      | 1.49        | 1.21      | -1.05       | 1.09       | 1.06         | -1.30      | 1.07         | -2.04      | -1.87        |
| LOC1005073 | uncharacterized LOC1005073  | ---                  | 0                                          | ---                                        | -1.04         | 1.02            | 1.33      | 1.52        | 1.09      | -1.11       | -1.09      | -1.11        | -1.93      | -1.60        | -2.07      | -2.08        |
| LOC1005074 | uncharacterized LOC1005074  | ---                  | 0                                          | ---                                        | -1.09         | -1.17           | 1.10      | 1.05        | -1.07     | -1.15       | -1.00      | 1.10         | -1.31      | -1.07        | 1.06       | 1.12         |
| LOC1005074 | uncharacterized LOC1005074  | ---                  | 0                                          | ---                                        | -1.53         | -2.05           | -1.30     | -1.01       | 1.20      | 1.32        | 1.02       | 1.05         | -1.02      | -1.17        | -1.21      | 1.24         |
| LOC1005074 | uncharacterized LOC1005074  | ---                  | 0                                          | ---                                        | -1.12         | -3.65           | -3.59     | -4.01       | -2.06     | 1.32        | -4.09      | -4.03        | -1.26      | -1.99        | -6.52      | 2.21         |
| LOC1005074 | uncharacterized LOC1005074  | ---                  | 0                                          | ---                                        | 1.00          | 1.30            | 1.15      | 1.25        | 1.03      | -1.06       | 2.01       | 1.33         | -3.38      | -2.42        | -2.82      | -2.22        |
| LOC1005075 | uncharacterized LOC1005075  | ---                  | 0                                          | ---                                        | -1.06         | -1.10           | -1.26     | -1.05       | 1.13      | -1.09       | -1.02      | -1.30        | 1.57       | 1.26         | 1.93       | 2.36         |
| LOC1005075 | uncharacterized LOC1005075  | ---                  | 0                                          | ---                                        | -1.11         | -1.07           | -1.05     | 1.12        | 1.18      | -1.02       | 1.08       | -1.06        | 1.43       | 1.19         | 2.08       | 2.26         |
| LOC1005075 | uncharacterized LOC1005075  | chr8p23.1            | 0                                          | ---                                        | 1.05          | -1.29           | 4.58      | 5.99        | -1.12     | 2.36        | 9.03       | 11.48        | 1.89       | 2.96         | 1.24       | -2.04        |
| LOC1005075 | uncharacterized LOC1005075  | ---                  | 0                                          | ---                                        | 1.14          | 1.05            | -1.10     | -1.20       | 1.06      | 1.11        | -1.01      | 1.10         | -1.61      | -1.45        | -1.69      | -1.98        |
| LOC1005075 | uncharacterized LOC1005075  | chr6p21.32           | response to biotic stimulus                | ---                                        | -1.23         | -1.30           | -1.03     | 1.32        | -1.04     | -1.16       | -1.22      | 1.26         | 1.11       | 1.07         | 1.06       | 1.70         |
| LOC1005075 | uncharacterized LOC1005075  | chr6p21.32           | response to biotic stimulus                | ---                                        | -1.07         | -1.08           | -1.09     | 1.02        | 1.02      | -1.22       | 1.03       | 1.08         | 1.27       | 1.53         | 1.57       | 1.80         |
| LOC1005075 | uncharacterized LOC1005075  | chr16q12.1           | ATP catabolic process                      | ---                                        | 1.07          | -1.03           | 1.15      | 1.17        | 1.10      | 1.28        | -1.07      | -1.07        | -1.61      | -1.38        | -1.24      | -1.15        |
| LOC1005075 | uncharacterized LOC1005075  | chr16q12.1           | ATP catabolic process                      | ---                                        | 1.21          | 1.09            | 1.14      | 1.31        | -1.16     | -1.04       | 1.18       | 1.35         | -1.51      | -1.52        | -1.51      | -1.35        |
| LOC1005075 | uncharacterized LOC1005075  | ---                  | 0                                          | ---                                        | -1.25         | -1.10           | -1.02     | 1.26        | 1.10      | -1.29       | 1.38       | 1.18         | -1.37      | -1.12        | -3.15      | -1.73        |
| LOC1005075 | uncharacterized LOC1005075  | ---                  | 0                                          | ---                                        | 1.33          | 1.35            | -1.65     | -1.19       | -1.19     | -1.22       | 1.18       | 1.12         | 1.92       | 1.53         | -1.60      | -1.04        |
| LOC1005076 | uncharacterized LOC1005076  | ---                  | 0                                          | ---                                        | -1.06         | -1.15           | 1.12      | 1.28        | 1.25      | -1.20       | 1.08       | -1.02        | 1.15       | 1.11         | -1.46      | -1.01        |
| LOC1005076 | uncharacterized LOC1005076  | chr1p32.3            | ---                                        | ---                                        | -1.16         | 1.41            | -1.26     | -1.43       | -1.55     | -1.10       | -2.11      | 1.03         | 1.08       | 1.28         | -3.48      | -2.17        |
| LOC1005076 | uncharacterized LOC1005076  | chr1p32.3            | ---                                        | ---                                        | -1.21         | -1.07           | -1.05     | 1.09        | -1.08     | 1.19        | -1.08      | -1.40        | -2.42      | -2.47        | -2.22      | -2.30        |
| LOC1005076 | uncharacterized LOC1005076  | ---                  | 0                                          | ---                                        | 1.15          | -1.11           | 2.24      | 2.53        | 1.31      | -1.18       | 1.12       | -1.05        | -2.13      | -5.74        | -1.66      | -2.74        |
| LOC1005076 | uncharacterized LOC1005076  | ---                  | 0                                          | Nuclear_Receptors // GenMAPP               | ---           | 1.30            | 1.07      | 1.18        | 1.04      | 1.46        | 1.35       | -1.37        | -1.14      | 1.05         | -1.38      | -2.03        |
| LOC1005084 | uncharacterized LOC1005084  | chr11p15             | nuclear-transcribed mRNA catabolic process | Ribosomal_Proteins // GenMAPP // Ribosomal | 1.04          | 1.06            | -1.02     | -1.02       | 1.00      | -1.01       | 1.27       | 1.08         | 1.38       | 1.05         | 1.11       | 1.06         |
| LOC1005091 | uncharacterized LOC1005091  | ---                  | 0                                          | ---                                        | -1.48         | 1.22            | -1.03     | -1.51       | -1.39     | -1.32       | 1.34       | 1.16         | 2.25       | 2.37         | -3.54      | -1.64        |
| LOC1005093 | uncharacterized LOC1005093  | ---                  | 0                                          | ---                                        | 1.26          | -1.20           | -1.04     | 1.33        | -1.00     | -1.26       | -1.11      | -1.07        | -9.04      | -6.20        | -12.35     | -7.75        |
| LOC1005094 | uncharacterized LOC1005094  | chr9p22.1            | response to organic cyclic compound        | ---                                        | -1.01         | -1.10           | 1.01      | 1.08        | 1.15      | 1.01        | 1.75       | 1.27         | 1.94       | 2.74         | 1.91       | 2.55         |
| LOC1005095 | uncharacterized LOC1005095  | chr12q13.13          | ---                                        | ---                                        | 1.79          | 1.35            | 1.11      | 1.16        | 1.56      | 1.48        | 1.36       | 1.26         | -2.97      | -1.85        | -3.72      | -3.83        |
| LOC1005096 | uncharacterized LOC1005096  | ---                  | 0                                          | ---                                        | -1.30         | -1.23           | -1.09     | -1.23       | 1.15      | 1.03        | -1.45      | -1.08        | -3.10      | -2.44        | -3.30      | -3.90        |
| LOC1005096 | uncharacterized LOC1005096  | ---                  | 0                                          | ---                                        | -1.32         | -1.56           | 1.11      | 1.20        | -1.08     | 1.07        | -1.18      | -1.07        | -3.41      | -2.24        | -3.05      | -3.12        |
| LOC1005098 | uncharacterized LOC1005098  | ---                  | 0                                          | ---                                        | 2.13          | -2.48           | -1.05     | -1.33       | -4.97     | -2.28       | -1.35      | 1.13         | 1.98       | 1.76         | -1.52      | -2.97        |
| LOC1005279 | uncharacterized LOC1005279  | ---                  | 0                                          | ---                                        | 1.00          | -1.80           | 1.35      | 1.41        | -1.03     | -1.18       | -1.03      | 1.22         | -2.23      | -2.50        | -3.05      | -3.09        |
| LOC1006309 | uncharacterized LOC1006309  | ---                  | 0                                          | ---                                        | 1.16          | 1.13            | 1.24      | 1.08        | 1.02      | -1.00       | 1.21       | 1.10         | 1.14       | 1.13         | 2.15       | 2.50         |
| LOC1006309 | LOC100289561-PRKRIP1        | chr7q22.1            | ---                                        | ---                                        | -1.18         | -1.28           | -1.42     | -1.01       | 1.27      | 1.14        | -1.34      | 1.03         | -1.00      | 1.23         | 1.01       | 1.01         |
| LOC1006313 | uncharacterized LOC1006313  | chr1q25.1            | ---                                        | ---                                        | -1.08         | -1.46           | 1.14      | 1.14        | 1.04      | 1.05        | 1.15       | -1.00        | -2.04      | -2.46        | -1.97      | -1.75        |
| LOC1006527 | uncharacterized LOC1006527  | ---                  | 0                                          | ---                                        | -1.57         | -1.31           | 1.27      | 1.45        | 1.26      | 1.09        | 1.23       | 1.13         | -1.03      | -1.08        | 1.69       | 1.41         |
| LOC1006527 | uncharacterized LOC1006527  | ---                  | 0                                          | ---                                        | 1.04          | -1.01           | 1.00      | -1.04       | 1.14      | 1.18        | -1.38      | -1.25        | -1.47      | -1.34        | -1.18      | -1.24        |
| LOC1006527 | uncharacterized LOC1006527  | chr18q21.1           | ---                                        | ---                                        | 1.54          | 1.14            | -1.38     | -1.03       | -6.31     | 1.30        | 2.76       | -2.95        | 7.48       | -1.35        | 8.37       | 1.98         |
| LOC1006529 | uncharacterized LOC1006529  | chr20q // chr20q13   | proteolysis                                | ---                                        | 1.11          | 1.10            | -1.05     | 1.16        | -1.14     | 1.13        | -1.01      | 1.37         | -1.16      | -1.04        | -1.62      | -1.43        |
| LOC1006530 | uncharacterized LOC1006530  | ---                  | 0                                          | ---                                        | -1.08         | 1.13            | -1.30     | 1.10        | -1.28     | -1.00       | 1.44       | 1.68         | 2.71       | 1.83         | 4.84       | 2.96         |
| LOC1006532 | uncharacterized LOC1006532  | ---                  | 0                                          | ---                                        | 1.13          | -1.04           | 1.05      | 1.16        | -1.01     | -1.03       | 1.00       | -1.13        | -1.25      | -1.19        | -1.75      | -1.53        |
| LOC1008626 | uncharacterized LOC1008626  | chr16p // chr16p11   | transcription, DNA-dependent               | ---                                        | -1.05         | -1.01           | -1.10     | -1.52       | -1.11     | 1.06        | 1.03       | -1.22        | 1.00       | -1.09        | 1.54       | 1.84         |
| LOC1008626 | uncharacterized LOC1008626  | chr16p // chr16p11   | transcription, DNA-dependent               | ---                                        | 1.09          | 1.01            | -1.32     | -1.45       | 1.18      | 1.07        | 1.06       | -1.04        | 1.10       | 1.02         | 1.03       | 1.24         |
| LOC1009962 | uncharacterized LOC1009962  | chr2q37.1            | angiogenesis                               | ---                                        | -1.00         | 1.02            | -1.06     | -1.03       | -1.09     | 1.01        | -1.08      | -1.07        | -1.05      | -1.04        | -1.19      | -1.28        |
| LOC1009962 | uncharacterized LOC1009962  | ---                  | 0                                          | ---                                        | -2.82         | -1.01           | 1.04      | -1.60       | -1.03     | 1.15        | 1.12       | -1.14        | -1.52      | -1.56        | 2.06       | 2.90         |
| LOC1009962 | uncharacterized LOC1009962  | ---                  | 0                                          | G_Protein_Signaling // GenMAPP             | ---           | -1.05           | 1.17      | 1.09        | -1.19     | 1.13        | -1.09      | 1.19         | -1.01      | 1.43         | 1.35       | 1.26         |
| LOC1009963 | uncharacterized LOC1009963  | ---                  | 0                                          | ---                                        | -1.29         | -1.88           | -1.48     | 1.55        | 2.56      | 1.92        | -1.18      | 1.52         | -1.71      | -1.37        | -1.32      | 1.18         |
| LOC1009963 | putative uncharacterized pr | ---                  | 0                                          | ---                                        | -1.28         | -1.40           | -1.14     | 1.05        | -1.18     | -1.07       | -1.34      | 1.04         | -1.77      | -1.71        | -3.43      | -2.37        |
| LOC1009963 | putative uncharacterized pr | ---                  | 0                                          | ---                                        | 1.23          | 1.41            | -1.57     | -1.40       | -1.01     | -1.09       | -1.01      | -1.11        | -2.06      | -3.59        | -3.23      | -2.95        |
| LOC1009963 | uncharacterized LOC1009963  | ---                  | 0                                          | ---                                        | 1.06          | 1.04            | -1.05     | -1.02       | 1.10      | 1.12        | -1.02      | -1.02        | -1.63      | -1.39        | -2.88      | -2.93        |
| LOC1009963 | uncharacterized LOC1009963  | ---                  | 0                                          | ---                                        | -1.04         | -1.03           | 1.20      | 1.25        | 1.16      | 1.23        | -1.29      | -1.18        | -4.20      | -2.83        | -3.29      | -3.19        |
| LOC1009964 | uncharacterized LOC1009964  | chr18q12             | ---                                        | ---                                        | 2.44          | -1.10           | -1.38     | -2.05       | -2.72     | 1.04        | -1.22      | 1.83         | 2.19       | 3.61         | -2.03      | -1.40        |

| ID         | Gene Title                                        | Chromosomal Location  | 1st Gene Ontology Biological Process       | Pathway                                      | A2497 30 mins | A2497P' 30 mins | A2497 2 h | A2497P' 2 h | A2497 4 h | A2497P' 4 h | A2497 24 h | A2497P' 24 h | A2497 48 h | A2497P' 48 h | A2497 72 h | A2497P' 72 h |
|------------|---------------------------------------------------|-----------------------|--------------------------------------------|----------------------------------------------|---------------|-----------------|-----------|-------------|-----------|-------------|------------|--------------|------------|--------------|------------|--------------|
| LOC1009964 | uncharacterized LOC1009964                        | ---                   | 0                                          | ---                                          | -1.12         | -1.98           | 1.06      | 1.13        | 1.15      | -1.27       | 1.45       | 1.17         | -1.43      | -1.61        | -1.93      | -1.36        |
| LOC1009964 | uncharacterized LOC1009964                        | chr16q23.2            | 0                                          | ---                                          | 1.07          | 1.00            | 1.17      | 1.05        | -1.03     | 1.07        | -1.32      | -1.13        | 1.08       | 1.12         | 1.37       | 1.26         |
| LOC1009964 | uncharacterized LOC1009964                        | ---                   | 0                                          | ---                                          | -3.96         | -3.97           | -1.11     | 1.90        | 4.84      | 2.62        | 1.91       | 1.52         | 1.66       | 3.55         | -1.23      | 1.45         |
| LOC1009964 | metastasis-associated lung                        | ---                   | 0                                          | ---                                          | -1.03         | 1.01            | -1.00     | 1.13        | -1.03     | 1.03        | -1.02      | 1.16         | -1.34      | -1.26        | -1.11      | -1.00        |
| LOC1009964 | uncharacterized LOC1009964                        | chr12p12.3            | signal transduction                        | ---                                          | 1.16          | 1.14            | -1.10     | -1.25       | -1.08     | -1.04       | -1.23      | -1.02        | 1.12       | 1.13         | 1.35       | -1.04        |
| LOC1009964 | uncharacterized LOC1009964                        | chr12p12.3            | signal transduction                        | ---                                          | -1.47         | -2.12           | 1.63      | 1.41        | -1.96     | -1.61       | 1.30       | 1.11         | 1.92       | 1.96         | 1.10       | 1.66         |
| LOC1009964 | uncharacterized LOC1009964                        | chr12p12.3            | signal transduction                        | ---                                          | -1.01         | -1.21           | 1.15      | 1.51        | -1.57     | -1.34       | -1.52      | -1.73        | -1.38      | -1.19        | 1.89       | 1.72         |
| LOC1009964 | uncharacterized LOC1009964                        | chr12p12.3            | signal transduction                        | ---                                          | -1.11         | -1.12           | 1.07      | -1.39       | 1.02      | 1.16        | -1.09      | 1.10         | 1.67       | 1.35         | 1.65       | 1.47         |
| LOC1009964 | DNA primase large subunit                         | chr6p12-p11.1         | G1                                         | DNA_replication_Reactome // GenMAPP //       | 1.34          | 1.06            | 1.01      | 1.15        | 1.06      | 1.09        | -1.38      | -1.03        | 1.03       | 1.18         | 1.68       | 1.38         |
| LOC1009964 | DNA primase large subunit                         | chr6p12-p11.1         | G1                                         | DNA_replication_Reactome // GenMAPP //       | -1.20         | 1.34            | 1.24      | 1.68        | -1.52     | -1.08       | 1.13       | -1.23        | 1.58       | -1.07        | 1.80       | -1.02        |
| LOC1009964 | DNA primase large subunit                         | chr6p12-p11.1         | G1                                         | DNA_replication_Reactome // GenMAPP //       | 1.05          | 1.03            | -1.08     | 1.04        | -1.00     | 1.11        | 1.24       | 1.19         | 1.44       | 1.30         | 1.29       | 1.28         |
| LOC1009964 | uncharacterized LOC1009964                        | ---                   | 0                                          | ---                                          | -1.01         | -1.20           | 1.09      | 1.04        | 1.20      | -1.02       | -1.01      | 1.01         | -1.90      | -1.76        | -2.10      | -2.17        |
| LOC1009964 | uncharacterized LOC1009964                        | ---                   | 0                                          | ---                                          | -1.45         | 1.02            | -1.38     | 1.34        | -1.56     | 1.95        | 1.14       | 1.15         | 2.68       | 5.09         | 1.93       | 1.85         |
| LOC1009964 | uncharacterized LOC1009964                        | ---                   | 0                                          | ---                                          | -1.02         | -1.24           | 1.02      | 1.10        | -1.07     | 1.02        | 1.72       | 1.56         | -2.68      | -2.27        | -2.18      | -1.65        |
| LOC1009964 | uncharacterized LOC1009964                        | chr1p34.3             | negative regulation of transcription from  | ---                                          | 1.06          | 1.07            | -1.04     | -1.03       | -1.09     | 1.02        | -1.40      | -1.20        | -2.12      | -2.17        | -2.22      | -1.48        |
| LOC1009964 | uncharacterized LOC1009964                        | chr1p34.3             | negative regulation of transcription from  | ---                                          | 1.36          | 1.49            | 1.04      | -1.27       | -1.14     | -1.04       | -2.21      | -1.45        | -2.44      | -5.10        | -1.17      | -1.86        |
| LOC1009965 | all-trans-retinol 13,14-reductase                 | chr2p11.2             | retinol metabolic process                  | ---                                          | -1.22         | -1.25           | 1.15      | 1.29        | 1.39      | 1.45        | -1.31      | -1.04        | 1.16       | 1.07         | 1.27       | 1.46         |
| LOC1009965 | uncharacterized LOC1009965                        | ---                   | 0                                          | ---                                          | 1.30          | 1.05            | 1.22      | 1.20        | 1.21      | 1.07        | 1.04       | -1.05        | -2.77      | -1.80        | -2.40      | -2.41        |
| LOC1009965 | uncharacterized LOC1009965                        | ---                   | 0                                          | ---                                          | -1.30         | -1.08           | 1.58      | 1.50        | 1.72      | 1.94        | 1.01       | -1.05        | -2.26      | -2.12        | -2.07      | -4.73        |
| LOC1009965 | uncharacterized LOC1009965                        | ---                   | 0                                          | GPCRDB_Class_C_Metabotropic glutamate        | 1.33          | -2.12           | -2.16     | -2.33       | 1.36      | -2.25       | 11.44      | 9.28         | -1.02      | 1.34         | -1.32      | 1.83         |
| LOC1009965 | uncharacterized LOC1009965                        | ---                   | 0                                          | ---                                          | -1.05         | -1.14           | 1.07      | 1.01        | 1.10      | 1.02        | 1.06       | 1.15         | -1.28      | -1.08        | -2.09      | -1.54        |
| LOC1009965 | uncharacterized LOC1009965                        | ---                   | 0                                          | ---                                          | -1.02         | 1.07            | 1.09      | 1.28        | -1.16     | 1.06        | -1.65      | -1.48        | -2.49      | -2.48        | -5.57      | -3.51        |
| LOC1009965 | uncharacterized LOC1009965                        | ---                   | 0                                          | ---                                          | 1.32          | 1.28            | -1.07     | -1.07       | 1.04      | -1.04       | -1.67      | -1.01        | -3.49      | -2.38        | -5.83      | -4.57        |
| LOC1009965 | uncharacterized LOC1009965                        | ---                   | 0                                          | ---                                          | 1.50          | 1.62            | 1.19      | 1.13        | -1.24     | -1.56       | 1.87       | 1.09         | -1.73      | -1.07        | -1.80      | -1.94        |
| LOC1009965 | uncharacterized LOC1009965                        | ---                   | 0                                          | ---                                          | 1.10          | 1.29            | -1.01     | -1.08       | -1.11     | -1.00       | -1.35      | -1.13        | -2.00      | -1.79        | -2.12      | -2.54        |
| LOC1009966 | uncharacterized LOC1009966                        | ---                   | 0                                          | ---                                          | -1.15         | -1.10           | 1.08      | -1.01       | 1.14      | 1.13        | -1.31      | -1.39        | -1.01      | 1.19         | 1.03       | 1.43         |
| LOC1009966 | uncharacterized LOC1009966                        | ---                   | 0                                          | ---                                          | 1.03          | -1.03           | 1.16      | 1.15        | 1.12      | 1.14        | -1.03      | -1.02        | -1.03      | 1.07         | 1.07       | 1.23         |
| LOC1009966 | uncharacterized LOC1009966                        | chr1p22.2             | transcription, DNA-dependent               | ---                                          | 1.09          | -1.04           | 1.17      | -1.16       | -1.00     | -1.07       | 1.12       | 1.15         | -1.54      | -1.23        | 1.50       | 1.39         |
| LOC1009966 | proline-rich nuclear receptor                     | chr1p36.11            | nuclear-transcribed mRNA catabolic process | ---                                          | -1.00         | 1.01            | -1.14     | -1.11       | -1.07     | 1.03        | -1.31      | -1.14        | -1.35      | -1.16        | -1.44      | -1.40        |
| LOC1009966 | uncharacterized LOC1009966                        | chr4q21.1             | cell morphogenesis                         | ---                                          | -1.06         | -1.09           | 1.06      | 1.08        | -1.00     | -1.04       | 1.44       | 1.29         | 1.50       | 1.32         | 1.62       | 1.45         |
| LOC1009966 | uncharacterized LOC1009966                        | chr4q21.1             | cell morphogenesis                         | ---                                          | 1.04          | 1.06            | 1.10      | -1.05       | 1.09      | 1.07        | 1.03       | 1.07         | -1.14      | -1.51        | -1.25      | -1.38        |
| LOC1009966 | monofunctional C1-tetrahydropyrimidinase          | chr6q25.1             | one-carbon metabolic process               | ---                                          | -1.00         | 1.04            | 1.04      | 1.03        | -1.05     | 1.07        | 1.06       | -1.01        | 1.17       | 1.11         | 1.07       | -1.02        |
| LOC1009966 | monofunctional C1-tetrahydropyrimidinase          | chr6q25.1             | one-carbon metabolic process               | ---                                          | 1.20          | 1.10            | 1.05      | -1.08       | 1.26      | 1.09        | 1.38       | 1.66         | 1.49       | 1.55         | 1.35       | 1.35         |
| LOC1009966 | serine/arginine-rich splicing factor              | chr1p36.11            | assembly of spliceosomal tri-snRNP         | mRNA_processing_Reactome // GenMAPP          | -1.06         | -1.01           | 1.06      | 1.09        | 1.20      | 1.00        | 1.01       | -1.10        | -1.20      | -1.32        | -1.11      | -1.38        |
| LOC1009966 | serine/arginine-rich splicing factor              | chr1p36.11            | assembly of spliceosomal tri-snRNP         | mRNA_processing_Reactome // GenMAPP          | 1.26          | 1.22            | 1.02      | 1.02        | -1.08     | 1.05        | -1.35      | -1.41        | -2.01      | -1.85        | -1.59      | -2.21        |
| LOC1009966 | serine/arginine-rich splicing factor              | chr1p36.11            | assembly of spliceosomal tri-snRNP         | mRNA_processing_Reactome // GenMAPP          | 1.00          | 1.05            | 1.01      | -1.05       | 1.05      | 1.08        | -1.33      | -1.24        | -1.56      | -1.38        | -1.36      | -1.45        |
| LOC1009966 | serine/arginine-rich splicing factor              | chr1p36.11            | assembly of spliceosomal tri-snRNP         | mRNA_processing_Reactome // GenMAPP          | 1.06          | 1.02            | -1.12     | 1.00        | 1.10      | -1.02       | -1.36      | -1.22        | -1.77      | -1.43        | -1.66      | -1.67        |
| LOC1009966 | uncharacterized LOC1009966                        | ---                   | 0                                          | ---                                          | -1.52         | 3.15            | 1.78      | 1.67        | -2.44     | -1.62       | 1.90       | -1.24        | 1.53       | 1.12         | 1.63       | 1.67         |
| LOC1009966 | uncharacterized LOC1009966                        | chr10p11.2            | negative regulation of transcription from  | Hypertrophy_model // GenMAPP                 | -1.10         | -1.08           | 1.01      | -1.56       | -1.24     | -1.13       | -1.51      | -1.02        | 2.13       | 1.94         | 2.30       | 1.76         |
| LOC1009966 | uncharacterized LOC1009966                        | chr10p11.2            | negative regulation of transcription from  | Hypertrophy_model // GenMAPP                 | -1.01         | 1.02            | 1.06      | 1.03        | -1.05     | 1.07        | -1.19      | -1.10        | 1.12       | 1.34         | 1.33       | 1.32         |
| LOC1009966 | uncharacterized LOC1009966                        | chr10p11.2            | negative regulation of transcription from  | Hypertrophy_model // GenMAPP                 | 1.02          | 1.10            | 1.24      | -1.11       | 1.01      | -1.03       | -1.01      | -1.01        | 1.27       | 1.26         | 2.05       | 1.62         |
| LOC1009966 | uncharacterized LOC1009966                        | chr10p11.2            | negative regulation of transcription from  | Hypertrophy_model // GenMAPP                 | 1.06          | -1.11           | 2.31      | 1.88        | 1.15      | 1.25        | 2.09       | 2.34         | -1.29      | -1.33        | 1.41       | 1.37         |
| LOC1009967 | myomegalin-like /// myomegalin                    | chr1q12 /// chr1q21   | cellular protein complex assembly          | ---                                          | 1.12          | 1.08            | 1.06      | -1.29       | 1.05      | 1.11        | -1.19      | -1.14        | 1.19       | 1.20         | 1.65       | 1.29         |
| LOC1009967 | myomegalin-like /// myomegalin                    | chr1q12 /// chr1q21   | cellular protein complex assembly          | ---                                          | -1.05         | -1.11           | -1.06     | -1.26       | 1.14      | 1.03        | -1.22      | -1.06        | -1.01      | 1.01         | 1.34       | 1.05         |
| LOC1009967 | myomegalin-like /// myomegalin                    | chr1q12 /// chr1q21   | cellular protein complex assembly          | ---                                          | 1.07          | -1.27           | 1.09      | 1.08        | 1.17      | 1.25        | -1.57      | -1.36        | 1.12       | 1.26         | 1.11       | 1.26         |
| LOC1009967 | myomegalin-like /// myomegalin                    | chr1q12 /// chr1q21   | cellular protein complex assembly          | ---                                          | 2.09          | -1.10           | 1.18      | 1.12        | -1.22     | 1.06        | 1.05       | 1.07         | -3.13      | -1.91        | 1.53       | 1.58         |
| LOC1009967 | peptidyl-prolyl cis-trans isomerase               | chr1q21.1 /// chr1q22 | protein peptidyl-prolyl isomerization      | ---                                          | -1.14         | -1.45           | -1.08     | 1.01        | -1.26     | -1.44       | -2.19      | -1.56        | 1.64       | 1.43         | -1.08      | 1.07         |
| LOC1009967 | uncharacterized LOC1009967                        | chr1q21               | cyclic nucleotide metabolic process        | ---                                          | 1.13          | 1.29            | -1.32     | -1.26       | -1.12     | 1.02        | -1.62      | -1.31        | 2.17       | 2.40         | 1.16       | 1.04         |
| LOC1009967 | uncharacterized LOC1009967                        | chr12q21 /// chr1q22  | cyclic nucleotide metabolic process        | ---                                          | 1.01          | -1.02           | 1.10      | 1.01        | -1.04     | 1.01        | -1.07      | -1.11        | 1.32       | 1.31         | 1.38       | 1.22         |
| LOC1009967 | uncharacterized LOC1009967                        | ---                   | 0                                          | ---                                          | -1.18         | -1.15           | -1.22     | -1.28       | 1.31      | 1.14        | 1.13       | -1.30        | 1.04       | -1.03        | 1.94       | 2.72         |
| LOC1009967 | protein FRG1-like                                 | ---                   | 0                                          | ---                                          | 1.24          | 1.15            | 1.21      | 1.05        | -1.33     | -1.09       | -1.10      | -1.07        | 1.34       | 1.39         | -1.45      | -1.71        |
| LOC1009967 | dual specificity mitogen-activated protein kinase | chr17q11.2            | MAPK cascade                               | Integrin-mediated_cell_adhesion_KEGG // KEGG | 1.02          | 1.15            | 1.01      | -1.22       | -1.06     | -1.06       | 1.01       | 1.11         | 1.45       | 1.42         | 1.33       | 1.17         |
| LOC1009967 | dual specificity mitogen-activated protein kinase | chr17q11.2            | MAPK cascade                               | Integrin-mediated_cell_adhesion_KEGG // KEGG | -1.15         | -1.00           | -1.20     | -1.18       | -1.01     | -1.14       | 1.13       | 1.02         | 1.59       | 1.18         | 1.26       | 1.21         |
| LOC1009968 | uncharacterized LOC1009968                        | chr16q24.3            | 0                                          | ---                                          | 1.31          | 1.45            | -1.04     | -1.32       | -1.05     | -1.05       | -1.21      | 1.03         | -3.22      | -3.13        | -3.13      | -4.19        |
| LOC1009968 | uncharacterized LOC1009968                        | chr17p13.3            | transport                                  | ---                                          | -1.07         | 1.09            | 1.28      | -1.33       | -1.07     | 1.12        | -1.42      | 1.15         | -1.92      | 1.01         | 1.07       | 1.01         |
| LOC1009968 | uncharacterized LOC1009968                        | ---                   | 0                                          | ---                                          | 1.03          | -1.39           | -1.31     | -1.18       | 1.75      | 1.53        | -1.46      | -1.33        | -6.98      | -4.11        | -4.75      | -4.52        |
| LOC1009968 | uncharacterized LOC1009968                        | ---                   | 0                                          | ---                                          | -1.28         | -1.10           | 1.20      | 1.26        | -1.05     | -1.09       | -1.03      | -1.04        | -2.47      | -2.23        | -2.84      | -2.72        |
| LOC1009969 | uncharacterized LOC1009969                        | chr5p15.33            | 0                                          | ---                                          | -1.21         | 1.02            | -1.05     | -1.17       | 1.49      | 1.26        | 1.01       | -1.79        | 1.16       | -1.42        | 2.52       | 2.17         |
| LOC1009969 | uncharacterized LOC1009969                        | chr5p15.33            | 0                                          | ---                                          | 2.51          | -1.99           | -1.16     | -1.22       | 2.18      | 1.72        | 1.24       | -1.16        | -1.85      | -2.03        | 3.59       | 2.33         |
| LOC1009969 | uncharacterized LOC1009969                        | ---                   | 0                                          | ---                                          | -1.00         | -1.04           | -1.05     | -1.01       | 1.06      | -1.02       | -1.20      | 1.06         | -1.80      | -1.57        | -1.54      | -1.36        |
| LOC1010599 | mucin-5AC-like /// mucin 5                        | chr11p15.5            | cell adhesion                              | ---                                          | -1.20         | 1.75            | 1.38      | 1.14        | 1.35      | 2.40        | -1.13      | -1.55        | 1.02       | -2.33        | 1.88       | 1.20         |
| LOC1010599 | uncharacterized LOC1010599                        | chr11q13.2            | DNA replication                            | ---                                          | -1.09         | 1.07            | -1.02     | -1.03       | 1.16      | 1.02        | -1.20      | -1.06        | 1.26       | -1.05        | -1.01      | 1.03         |
| LOC1010600 | uncharacterized LOC1010600                        | ---                   | 0                                          | ---                                          | 1.13          | -1.01           | -1.03     | -1.17       | -1.21     | -1.10       | -1.26      | -1.09        | -2.50      | -2.11        | -2.83      | -2.76        |
| LOC1010600 | uncharacterized LOC1010600                        | chr21q22.12           | 0                                          | ---                                          | -1.07         | -1.00           | 1.00      | -1.05       | 1.05      | -1.04       | 1.16       | 1.10         | -1.23      | -1.32        | -1.05      | -1.17        |
| LOC1010600 | uncharacterized LOC1010600                        | ---                   | 0                                          | ---                                          | -8.16         | -1.93           | 1.59      | 1.47        | -2.03     | 1.36        | 1.88       | 2.65         | 3.93       | 1.80         | 2.08       | 2.02         |
| LOC1010601 | uncharacterized LOC1010601                        | chr3q28               | 0                                          | ---                                          | 1.54          | -1.86           | -1.01     | -1.27       | 1.96      | 1.75        | -1.64      | -1.28        | -2.81      | -2.74        | -2.74      | -1.85        |



| ID        | Gene Title                    | Chromosomal Location      | 1st Gene Ontology Biological Process      | Pathway | A2497 30 mins | A2497P' 30 mins | A2497 2 h | A2497P' 2 h | A2497 4 h | A2497P' 4 h | A2497 24 h | A2497P' 24 h | A2497 48 h | A2497P' 48 h | A2497 72 h | A2497P' 72 h |
|-----------|-------------------------------|---------------------------|-------------------------------------------|---------|---------------|-----------------|-----------|-------------|-----------|-------------|------------|--------------|------------|--------------|------------|--------------|
| LOC219688 | uncharacterized LOC21968      | chr10p12.33               | 0                                         | ---     | -2.35         | 1.22            | -1.01     | 1.12        | -1.58     | -1.02       | -1.22      | -1.26        | -3.55      | -1.62        | -4.18      | -1.53        |
| LOC221272 | uncharacterized LOC22127      | chr6q22.1                 | 0                                         | ---     | 1.13          | -1.09           | 1.05      | -1.08       | 1.04      | 1.21        | -1.12      | 1.41         | -2.39      | -1.63        | -3.29      | -2.22        |
| LOC221814 | uncharacterized LOC22181      | chr7p21.3                 | 0                                         | ---     | 3.21          | 4.15            | -2.11     | -1.39       | -1.70     | 4.56        | 8.50       | 4.53         | -1.19      | -3.19        | -1.23      | 4.21         |
| LOC221946 | uncharacterized LOC22194      | chr7p22.2                 | 0                                         | ---     | 1.28          | 1.23            | 2.37      | 3.72        | -1.44     | -1.23       | 1.20       | 1.34         | 2.21       | 2.01         | -1.04      | -1.45        |
| LOC253842 | uncharacterized LOC25384      | chr9q33.3 /// chr9q33.3   | negative regulation of transcription from | ---     | 1.02          | -1.16           | 1.24      | 1.10        | 1.20      | 1.43        | 1.23       | 1.06         | -1.90      | -1.74        | -1.23      | -1.42        |
| LOC254057 | uncharacterized LOC25405      | chr3q21.3                 | 0                                         | ---     | 1.03          | 1.05            | -1.04     | 1.18        | 1.08      | -1.04       | 1.03       | -1.01        | -2.13      | -2.16        | -3.28      | -2.42        |
| LOC254128 | uncharacterized LOC25412      | chr2q14.2                 | 0                                         | ---     | -1.03         | -1.52           | -1.54     | -1.86       | -1.73     | -1.08       | 1.19       | 1.64         | 1.17       | -2.02        | -1.48      | -1.27        |
| LOC254128 | uncharacterized LOC25412      | chr2q14.2                 | 0                                         | ---     | -1.15         | -1.04           | -1.04     | -1.03       | 1.15      | -1.00       | -1.00      | 1.03         | -2.14      | -2.10        | -2.18      | -2.21        |
| LOC255167 | uncharacterized LOC25516      | chr5p15.31                | 0                                         | ---     | 2.47          | 1.45            | -2.07     | -4.04       | 4.05      | 3.36        | -6.81      | -1.34        | 2.87       | 1.86         | 2.07       | 5.87         |
| LOC257152 | uncharacterized LOC25715      | chr8q22.3                 | 0                                         | ---     | 1.54          | 1.15            | 1.58      | 1.25        | -1.21     | -1.00       | 1.24       | 1.38         | 1.22       | -1.40        | -1.24      | -1.47        |
| LOC257396 | uncharacterized LOC25739      | chr5q11.2                 | 0                                         | ---     | -1.14         | 1.07            | 1.19      | -1.07       | 1.29      | 1.18        | -1.36      | 1.40         | -6.04      | -5.93        | -5.30      | -4.39        |
| LOC283038 | uncharacterized LOC28303      | chr10q26.2                | 0                                         | ---     | 1.74          | -1.84           | 1.64      | -1.72       | -1.08     | -1.17       | -2.76      | 1.61         | 1.44       | 1.10         | -1.04      | 2.25         |
| LOC283075 | uncharacterized LOC28307      | chr10p12.31               | 0                                         | ---     | 1.24          | 1.50            | 1.14      | -1.15       | -1.06     | -2.05       | -1.24      | -1.24        | -5.35      | -4.38        | -5.39      | -6.89        |
| LOC283075 | uncharacterized LOC28307      | chr10p12.31               | 0                                         | ---     | 1.70          | 1.13            | -1.43     | -1.02       | 1.17      | -1.64       | -1.15      | 1.28         | -7.98      | -5.19        | -2.40      | -3.60        |
| LOC283112 | uncharacterized LOC28311      | chr11p15.1                | 0                                         | ---     | -1.01         | 1.24            | 1.34      | 2.55        | 6.54      | 9.51        | 3.51       | 3.83         | 9.96       | 1.76         | 1.47       | -1.33        |
| LOC283270 | uncharacterized LOC28327      | chr11p13                  | 0                                         | ---     | 1.45          | 1.15            | 1.21      | 2.13        | -1.01     | -1.03       | 1.16       | -1.19        | 1.48       | -1.08        | -1.05      | 1.12         |
| LOC283278 | uncharacterized LOC28327      | chr11p15.1                | 0                                         | ---     | 1.15          | -1.04           | -1.12     | -1.08       | 1.38      | 1.31        | -1.11      | -1.11        | -1.62      | -1.59        | -2.33      | -1.54        |
| LOC283357 | uncharacterized LOC28335      | chr12p13.33               | 0                                         | ---     | 2.24          | 1.73            | 1.02      | -1.16       | -1.39     | -1.04       | -1.67      | -1.05        | -1.95      | -2.08        | -1.81      | -2.77        |
| LOC283403 | uncharacterized LOC28340      | chr12q13.13               | 0                                         | ---     | 1.29          | -1.70           | 1.32      | 1.35        | 1.02      | -2.09       | 2.12       | 2.01         | -1.06      | -1.23        | 1.48       | 1.28         |
| LOC283403 | uncharacterized LOC28340      | chr12q13.13               | 0                                         | ---     | 1.10          | -2.01           | 4.77      | 1.95        | 1.64      | 1.53        | 1.38       | 1.59         | -1.07      | -1.45        | 2.06       | 1.79         |
| LOC283501 | uncharacterized LOC28350      | chr13q34                  | 0                                         | ---     | -1.83         | 1.05            | -1.61     | 1.20        | -2.63     | 2.11        | 1.04       | 1.18         | 1.57       | 1.01         | 1.92       | 1.19         |
| LOC283588 | uncharacterized LOC28358      | chr14q32.11               | 0                                         | ---     | 1.30          | 1.29            | 1.20      | 1.07        | -1.66     | -1.24       | -1.15      | -1.20        | -2.52      | -1.87        | -3.11      | -2.52        |
| LOC283658 | uncharacterized LOC28365      | chr15q21.1                | kidney development                        | ---     | -1.20         | -1.17           | 1.46      | 1.15        | 1.04      | 1.31        | -1.08      | -1.16        | -1.55      | -1.62        | 1.18       | 1.17         |
| LOC283674 | uncharacterized LOC28367      | chr15q22.32               | 0                                         | ---     | -1.54         | -1.41           | 1.50      | 4.34        | 2.10      | 1.59        | -1.78      | 1.41         | 12.96      | 3.19         | -4.01      | -1.25        |
| LOC283682 | uncharacterized LOC28368      | chr15q26.1-q26.2          | 0                                         | ---     | -2.11         | -1.87           | 2.57      | 1.15        | -25.09    | -3.41       | -4.96      | -1.83        | 3.50       | 5.58         | -1.29      | -1.08        |
| LOC283693 | actin, alpha 2, smooth muscle | chr15q25.2                | 0                                         | ---     | -1.11         | 2.94            | -2.65     | -1.49       | -1.28     | 1.50        | 1.03       | 2.64         | -1.04      | -1.05        | -1.87      | -1.24        |
| LOC283713 | uncharacterized LOC28371      | chr15q13.1                | 0                                         | ---     | -1.08         | -1.07           | 1.20      | 1.05        | 1.41      | 1.55        | -1.35      | -1.22        | -2.40      | -2.38        | -4.03      | -3.18        |
| LOC283788 | FSHD region gene 1 pseudogene | ---                       | 0                                         | ---     | 1.63          | 1.46            | -1.48     | -1.60       | -1.18     | -1.03       | -1.27      | -1.21        | -1.54      | -1.49        | -2.01      | -3.01        |
| LOC283788 | FSHD region gene 1 pseudogene | ---                       | 0                                         | ---     | -1.06         | -1.52           | 2.03      | 1.95        | -1.09     | -1.09       | -1.21      | 1.14         | -4.34      | -5.26        | -2.05      | -7.71        |
| LOC283914 | uncharacterized LOC28391      | chr16p11.2-p11.1          | 0                                         | ---     | -1.58         | -1.27           | -1.52     | -1.02       | -1.08     | 1.08        | -2.75      | 1.28         | 1.12       | 1.37         | 1.02       | 1.02         |
| LOC284009 | uncharacterized LOC28400      | chr17p13.3                | 0                                         | ---     | 1.01          | 1.32            | -1.14     | -1.15       | 1.70      | 1.92        | -1.52      | 1.09         | -1.66      | -1.86        | 1.94       | 1.23         |
| LOC284014 | uncharacterized LOC28401      | chr17p13.3                | 0                                         | ---     | 1.22          | 1.30            | -1.28     | -1.10       | -1.10     | -1.11       | 1.02       | 1.25         | 1.02       | 1.09         | -1.14      | -1.28        |
| LOC284023 | uncharacterized LOC28402      | chr17p13.1                | 0                                         | ---     | -1.02         | -1.01           | -1.05     | -1.13       | 1.08      | -1.00       | 1.00       | 1.07         | -1.37      | -1.19        | -1.22      | -1.16        |
| LOC284080 | uncharacterized LOC28408      | chr17q21.33               | 0                                         | ---     | -1.43         | -1.92           | -1.05     | 1.18        | 1.65      | -1.14       | -1.02      | -1.14        | 6.85       | 6.69         | 8.27       | 4.42         |
| LOC284080 | uncharacterized LOC28408      | chr17q21.33               | 0                                         | ---     | 1.23          | -1.15           | 8.05      | 8.10        | 3.81      | 3.96        | -5.87      | -1.13        | 1.08       | 1.72         | 4.13       | 4.09         |
| LOC284112 | uncharacterized LOC28411      | chr17p13.1 /// chr17p13.1 | 0                                         | ---     | -1.05         | -1.09           | -1.13     | -1.18       | -1.15     | -1.29       | -1.03      | -1.05        | 1.28       | 1.33         | 1.06       | 1.13         |
| LOC284219 | uncharacterized LOC28421      | chr18p11.22               | 0                                         | ---     | 1.25          | -1.04           | -1.15     | -1.32       | 1.32      | 1.35        | -1.37      | -1.12        | -1.31      | 1.10         | 1.51       | 1.18         |
| LOC284454 | uncharacterized LOC28445      | chr19p13.13               | 0                                         | ---     | 1.10          | 1.09            | -1.05     | 1.09        | 1.06      | 1.07        | 1.13       | 1.19         | 1.47       | 1.15         | 1.46       | 1.68         |
| LOC284551 | uncharacterized LOC28455      | chr1p35.2                 | 0                                         | ---     | 1.46          | 1.37            | -1.51     | -2.59       | 1.62      | 1.04        | -2.15      | 1.27         | -3.26      | -1.09        | -1.43      | 1.38         |
| LOC284578 | uncharacterized LOC28457      | chr1q32.1                 | 0                                         | ---     | -2.36         | -1.19           | 1.55      | 1.01        | -1.09     | 1.54        | -2.21      | -1.38        | 3.28       | 3.86         | 2.54       | -1.90        |
| LOC284757 | uncharacterized LOC28475      | chr20q13.33               | 0                                         | ---     | 1.33          | 1.05            | 1.57      | 2.23        | -1.23     | 1.04        | -1.22      | -1.14        | -2.02      | -4.39        | -1.90      | -1.36        |
| LOC284788 | uncharacterized LOC28478      | chr20p11.21               | 0                                         | ---     | -1.71         | -1.23           | 2.21      | -1.44       | 1.20      | -2.11       | -1.23      | 1.37         | 3.03       | 3.10         | -4.52      | -1.29        |
| LOC284865 | uncharacterized LOC28486      | chr22q11.21               | 0                                         | ---     | -1.15         | 1.33            | -1.16     | -1.68       | -1.25     | -1.10       | -1.12      | 1.34         | 2.20       | 1.10         | 1.84       | 1.63         |
| LOC284926 | uncharacterized LOC28492      | chr22q13.31               | 0                                         | ---     | 1.12          | 1.11            | 1.19      | -1.01       | 1.17      | 1.16        | -1.29      | -1.08        | -2.73      | -1.94        | -2.72      | -2.17        |
| LOC284950 | uncharacterized LOC28495      | chr2p11.2                 | 0                                         | ---     | 1.01          | -1.04           | 1.32      | 1.73        | 2.20      | 2.00        | -2.34      | -1.35        | 1.79       | 1.45         | 1.15       | -5.29        |
| LOC285074 | anaphase promoting complex    | chr2p11.2                 | 0                                         | ---     | 1.03          | -1.04           | 1.12      | 1.20        | -1.04     | 1.02        | 1.39       | 1.23         | 1.67       | 1.34         | 1.43       | 1.39         |
| LOC285147 | uncharacterized LOC28514      | chr2p25.2                 | 0                                         | ---     | 22.15         | 22.94           | -1.27     | -1.74       | 1.01      | -1.24       | 1.10       | -1.40        | -1.39      | -1.16        | 1.08       | 1.53         |
| LOC285147 | uncharacterized LOC28514      | chr2p25.2                 | 0                                         | ---     | -1.11         | -1.88           | 3.13      | 2.52        | -1.05     | 1.05        | -1.39      | -1.08        | 1.35       | 1.08         | 1.41       | 1.46         |
| LOC285178 | uncharacterized LOC28517      | chr2q35                   | 0                                         | ---     | 1.00          | -1.03           | 1.18      | -1.02       | -1.14     | -1.17       | -1.15      | -1.15        | -2.52      | -2.25        | -3.01      | -2.63        |
| LOC285181 | uncharacterized LOC28518      | chr2q36.1                 | 0                                         | ---     | 2.30          | 1.90            | -1.62     | -1.01       | -1.20     | -1.99       | -1.29      | 1.64         | -1.74      | 1.58         | 2.72       | 1.50         |
| LOC285419 | uncharacterized LOC28541      | chr4q28.1                 | 0                                         | ---     | 1.47          | 1.14            | -1.52     | 1.06        | -2.64     | 1.00        | 1.54       | 1.30         | -1.36      | -1.06        | -1.07      | 1.67         |
| LOC285540 | uncharacterized LOC28554      | chr4p15.31                | 0                                         | ---     | 1.07          | -1.25           | 1.43      | 1.59        | -3.04     | -1.07       | -1.32      | -1.15        | -2.39      | -1.73        | -1.49      | -1.13        |
| LOC285540 | uncharacterized LOC28554      | chr4p15.2 /// chr4p15.31  | phospholipid metabolic process            | ---     | 1.11          | 1.24            | 1.04      | -1.11       | -1.02     | 1.05        | -1.21      | -1.06        | -1.67      | -1.41        | -1.51      | -1.84        |
| LOC285548 | uncharacterized LOC28554      | chr4p15.33                | 0                                         | ---     | -1.02         | -1.28           | -1.44     | -1.51       | 1.29      | 1.08        | -1.85      | -1.12        | -2.68      | -1.35        | -2.74      | -2.79        |
| LOC285692 | uncharacterized LOC28569      | chr5p15.31                | 0                                         | ---     | 1.80          | 2.73            | -2.33     | -1.84       | -1.41     | -4.11       | 2.46       | 2.95         | 1.32       | 1.30         | -3.91      | -1.29        |
| LOC285766 | uncharacterized LOC28576      | chr6p25.3                 | 0                                         | ---     | 1.20          | 2.15            | 1.06      | -4.81       | -1.11     | -1.38       | -1.78      | -1.31        | 1.23       | 1.51         | -1.09      | -1.46        |
| LOC285812 | uncharacterized LOC28581      | chr6p23                   | metabolic process                         | ---     | -1.06         | 1.29            | 1.44      | -1.01       | 1.43      | 1.38        | 1.07       | -1.18        | -1.15      | -1.24        | 1.08       | 1.26         |
| LOC285819 | uncharacterized LOC28581      | chr6p22.1                 | 0                                         | ---     | -1.14         | -1.26           | -1.20     | -1.26       | -1.31     | -1.10       | -1.52      | -1.32        | 3.14       | 1.96         | 2.70       | 2.29         |
| LOC285835 | uncharacterized LOC28583      | chr6p21.32                | 0                                         | ---     | 1.17          | 1.01            | -1.07     | 1.10        | 1.16      | 1.02        | -1.01      | -1.04        | -2.43      | -2.65        | -1.82      | -2.07        |
| LOC285957 | uncharacterized LOC28595      | chr7p13                   | 0                                         | ---     | 1.66          | 1.78            | 1.23      | 1.76        | -1.26     | -1.63       | -1.59      | -1.34        | -1.18      | -1.29        | 1.25       | -1.10        |
| LOC285972 | uncharacterized LOC28597      | chr7q36.1                 | 0                                         | ---     | -1.75         | 1.37            | -1.38     | 1.62        | 3.36      | 3.48        | -3.51      | -2.32        | 1.57       | 3.25         | -1.29      | 1.23         |
| LOC286052 | uncharacterized LOC28605      | chr8q24.13                | 0                                         | ---     | 1.11          | 1.03            | 1.06      | 1.14        | 1.04      | 1.08        | -1.23      | -1.06        | -1.08      | 1.11         | 1.05       | 1.23         |
| LOC286071 | uncharacterized LOC28607      | chr8q11.22                | 0                                         | ---     | -1.24         | 1.08            | -1.01     | -1.45       | -1.54     | 2.02        | -2.43      | -1.13        | -3.67      | -2.23        | -9.56      | -3.39        |
| LOC286161 | uncharacterized LOC28616      | chr8p23.3                 | 0                                         | ---     | 1.16          | 1.23            | -1.01     | -1.18       | 1.12      | 1.41        | -1.05      | -1.02        | -2.71      | -2.18        | -3.46      | -2.97        |
| LOC286190 | uncharacterized LOC28619      | chr8q13.2                 | 0                                         | ---     | -2.19         | 1.10            | 1.24      | 1.10        | -3.46     | -1.63       | -1.87      | -1.66        | 2.55       | 1.72         | -1.75      | -2.13        |
| LOC286254 | uncharacterized LOC28625      | chr9q34.3                 | 0                                         | ---     | -1.02         | 1.44            | -1.32     | 1.04        | 1.10      | -1.00       | 1.25       | 1.45         | 1.26       | -1.00        | -2.12      | -1.51        |

| ID        | Gene Title                   | Chromosomal Location    | 1st Gene Ontology Biological Process | Pathway                               | A2497 30 mins | A2497P' 30 mins | A2497 2 h | A2497P' 2 h | A2497 4 h | A2497P' 4 h | A2497 24 h | A2497P' 24 h | A2497 48 h | A2497P' 48 h | A2497 72 h | A2497P' 72 h |
|-----------|------------------------------|-------------------------|--------------------------------------|---------------------------------------|---------------|-----------------|-----------|-------------|-----------|-------------|------------|--------------|------------|--------------|------------|--------------|
| LOC286367 | FP944                        | chr9q31.1               | 0                                    | ---                                   | -1.01         | 1.19            | -1.04     | 1.33        | -1.04     | 1.07        | -1.30      | -1.55        | -1.10      | -1.27        | -2.35      | -1.51        |
| LOC286437 | uncharacterized LOC28643     | chrXq22.2               | 0                                    | ---                                   | 1.21          | 1.02            | -1.01     | -1.09       | 1.11      | -1.01       | 1.03       | -1.01        | -1.62      | -1.78        | -1.54      | -1.24        |
| LOC286467 | family with sequence simil   | chrXq26.2               | 0                                    | ---                                   | -1.61         | -1.34           | 1.17      | 1.86        | 1.02      | 1.13        | -1.39      | -1.11        | -1.48      | -2.21        | -3.28      | -4.12        |
| LOC339240 | keratin 17 pseudogene        | chr17p11.2              | 0                                    | ---                                   | -1.36         | 1.28            | 1.49      | 1.41        | -1.60     | -1.12       | 1.02       | 1.61         | 2.54       | 1.97         | 1.61       | 2.27         |
| LOC340090 | uncharacterized LOC34009     | chr5q13.3               | 0                                    | ---                                   | 1.73          | 2.22            | 1.32      | 2.44        | -9.53     | -2.11       | -1.02      | 1.06         | 1.27       | 2.19         | 1.14       | 1.68         |
| LOC340239 | uncharacterized LOC34023     | chr7q11.21              | 0                                    | ---                                   | 3.10          | 3.43            | -2.83     | -1.57       | -3.53     | -5.14       | -1.21      | 1.08         | 1.89       | 2.46         | -2.50      | 1.61         |
| LOC344887 | NmrA-like family domain      | chr3q27.2               | 0                                    | ---                                   | 1.10          | 1.24            | 1.25      | 1.24        | 1.21      | 1.14        | 1.31       | 1.15         | -1.02      | -1.08        | 2.49       | 2.74         |
| LOC348761 | uncharacterized LOC34876     | chr2q37.1               | 0                                    | ---                                   | 1.13          | -1.64           | -1.06     | 1.69        | 1.47      | 2.59        | 1.04       | -1.02        | 4.84       | 10.25        | -2.35      | -1.70        |
| LOC374443 | C-type lectin domain family  | chr12p13.31             | 0                                    | ---                                   | -1.13         | -1.18           | 1.12      | 1.23        | -1.35     | -1.29       | 1.10       | -1.11        | 1.22       | 1.05         | 1.73       | 1.59         |
| LOC375295 | uncharacterized LOC37529     | chr2q31.1               | 0                                    | ---                                   | -1.04         | -1.42           | 1.00      | -1.24       | 1.02      | 1.04        | -1.17      | -1.15        | -2.65      | -1.90        | -3.38      | -3.66        |
| LOC377711 | HEAT repeat-containing pr    | chr8q24.3               | 0                                    | ---                                   | -1.01         | -1.07           | 1.06      | 1.05        | 1.03      | 1.02        | -1.12      | -1.09        | -1.16      | 1.03         | -1.47      | -1.87        |
| LOC388882 | uncharacterized LOC38888     | chr22q11.23             | 0                                    | ---                                   | 1.56          | 1.48            | 1.07      | -1.60       | 1.82      | 3.37        | 1.04       | 1.83         | 1.43       | 1.05         | 1.03       | 1.10         |
| LOC389247 | uncharacterized LOC38924     | chr4q35.1               | 0                                    | ---                                   | 1.10          | 1.05            | -1.20     | -1.26       | -1.30     | -1.07       | -1.21      | 1.31         | -1.11      | -1.06        | -1.13      | -2.00        |
| LOC389641 | uncharacterized LOC38964     | chr8p21.3               | 0                                    | ---                                   | -1.20         | -1.12           | 1.09      | -1.07       | -1.01     | -1.01       | 1.02       | -1.01        | 1.51       | 1.42         | 1.99       | 1.58         |
| LOC389831 | uncharacterized LOC38983     | ---                     | 0                                    | ---                                   | 1.30          | 1.24            | -1.08     | 1.00        | -1.11     | -1.08       | 1.03       | -1.10        | -1.60      | -1.59        | -1.29      | -1.48        |
| LOC389831 | uncharacterized LOC38983     | ---                     | 0                                    | ---                                   | 1.22          | 1.17            | 1.02      | -1.00       | -1.08     | 1.00        | -1.45      | -1.24        | -2.52      | -2.49        | -2.51      | -2.27        |
| LOC389831 | uncharacterized LOC38983     | ---                     | 0                                    | ---                                   | 1.10          | 1.08            | 1.03      | 1.00        | -1.06     | 1.10        | -1.20      | -1.11        | -1.57      | -1.25        | -1.43      | -1.56        |
| LOC389831 | uncharacterized LOC38983     | ---                     | 0                                    | ---                                   | 1.73          | 1.15            | -1.35     | -1.18       | 1.30      | 1.39        | -1.12      | 1.03         | -3.08      | -3.65        | -2.53      | -3.55        |
| LOC389834 | ankyrin repeat domain 57 p   | ---                     | 0                                    | ---                                   | -1.23         | -1.39           | 1.16      | 1.09        | -1.06     | 1.11        | -1.20      | -1.17        | -1.75      | -1.55        | 1.06       | -1.29        |
| LOC389834 | ankyrin repeat domain 57 p   | ---                     | 0                                    | ---                                   | 1.60          | 1.58            | 1.17      | 1.37        | 1.12      | 1.03        | -1.57      | -1.13        | -1.95      | -1.70        | -1.27      | -1.02        |
| LOC389834 | ankyrin repeat domain 57 p   | chr21p11.2              | 0                                    | microtubule cytoskeleton organization | 1.04          | 1.10            | 1.08      | 1.21        | 1.05      | -1.04       | -1.17      | -1.07        | -1.33      | -1.39        | -1.99      | -1.92        |
| LOC389895 | chromosome 16 open readi     | chrXq27.1               | 0                                    | ---                                   | -5.27         | -2.27           | -2.43     | -2.03       | -2.45     | -1.85       | 2.30       | 2.71         | 1.91       | -1.74        | -2.55      | -1.94        |
| LOC389906 | zinc finger protein 839 pse  | chrXp22.33              | 0                                    | ---                                   | -1.16         | -1.05           | 1.11      | -1.13       | 1.23      | 1.10        | 1.08       | -1.06        | -3.28      | -2.31        | -2.77      | -1.81        |
| LOC399900 | uncharacterized LOC39990     | chr11q12.3              | 0                                    | ---                                   | 1.47          | 1.42            | -1.37     | -1.07       | 1.43      | 2.67        | 2.12       | 2.02         | 1.96       | 1.48         | 4.02       | 1.67         |
| LOC400590 | uncharacterized LOC40059     | chr17q11.2              | 0                                    | ---                                   | 1.29          | 1.38            | 1.09      | -1.12       | 1.06      | 1.17        | -1.35      | -1.28        | -1.93      | -2.22        | -2.02      | -2.49        |
| LOC400655 | uncharacterized LOC40065     | chr18q22.3              | 0                                    | ---                                   | 1.04          | 1.74            | -1.14     | -1.21       | -3.82     | 2.54        | 1.38       | 1.35         | 8.92       | 5.90         | 2.29       | 2.75         |
| LOC400684 | uncharacterized LOC40068     | chr19q13.11             | 0                                    | ---                                   | -1.19         | -1.23           | -1.15     | 1.44        | 1.19      | 1.23        | 1.31       | 1.29         | -3.61      | -3.22        | -2.10      | -1.60        |
| LOC400752 | uncharacterized LOC40075     | chr1p34.1               | 0                                    | ---                                   | 1.48          | -1.74           | -1.61     | -1.63       | 1.32      | 2.06        | 2.86       | 3.03         | -1.37      | -1.32        | -2.32      | -2.15        |
| LOC400756 | uncharacterized LOC40075     | chr1p31.3               | 0                                    | ---                                   | 2.79          | 3.65            | 2.26      | 1.61        | -2.00     | -1.34       | -1.68      | -1.25        | 6.10       | 8.60         | -1.45      | -1.34        |
| LOC401052 | uncharacterized LOC40105     | chr3p25.3               | 0                                    | ---                                   | -1.14         | -1.19           | 1.09      | 1.07        | 1.09      | 1.11        | -1.02      | 1.03         | -1.79      | -1.70        | -1.81      | -1.54        |
| LOC401068 | uncharacterized LOC40106     | chr3p21.1               | 0                                    | ---                                   | 1.04          | 1.16            | 1.23      | -1.07       | -1.09     | -1.06       | -1.48      | -1.43        | -2.71      | -3.90        | -4.84      | -2.81        |
| LOC401220 | uncharacterized LOC40122     | chr5q35.3               | 0                                    | ---                                   | 5.49          | 1.15            | -5.84     | -1.09       | 2.20      | 1.63        | 1.79       | 1.81         | 15.58      | 19.70        | -1.84      | -1.13        |
| LOC401312 | uncharacterized LOC40131     | chr7p15.3               | 0                                    | ---                                   | 1.10          | 1.28            | 1.36      | 2.00        | 1.56      | 1.28        | -1.01      | 1.51         | 1.48       | 1.25         | 3.89       | 1.95         |
| LOC439938 | uncharacterized LOC43993     | chr6p21.33              | 0                                    | ---                                   | -1.25         | -1.53           | -3.09     | -1.55       | -1.66     | -3.45       | -1.43      | 1.78         | 4.02       | 3.09         | 5.76       | 6.70         |
| LOC440117 | uncharacterized LOC44011     | chr12q24.32             | 0                                    | ---                                   | 6.75          | 5.25            | 1.63      | -3.00       | 7.78      | 5.01        | -2.43      | -1.28        | -1.62      | -1.40        | 2.70       | 4.70         |
| LOC441124 | uncharacterized LOC44112     | chr1q42.11              | 0                                    | ---                                   | 1.34          | 1.60            | 1.23      | 1.27        | 1.18      | 1.03        | -1.00      | 1.06         | -1.59      | -1.62        | -2.00      | -2.93        |
| LOC441155 | zinc finger CCCH-type dom    | chr1q32.1 /// chr6q40   | 0                                    | ---                                   | 1.01          | -1.10           | 1.08      | 1.09        | 1.16      | 1.20        | -1.10      | -1.18        | -1.07      | 1.06         | -1.33      | -1.11        |
| LOC441178 | uncharacterized LOC44117     | chr6q27                 | 0                                    | ---                                   | -2.24         | -1.42           | -2.18     | 1.10        | -3.01     | 2.41        | -1.32      | 1.11         | 3.34       | 1.81         | 1.01       | 1.55         |
| LOC441242 | uncharacterized LOC44124     | chr7q11.21              | 0                                    | ---                                   | 1.35          | -1.03           | -3.78     | -1.25       | -1.28     | -2.24       | 1.15       | 1.22         | 2.73       | 2.12         | 4.70       | 5.86         |
| LOC441259 | postmeiotic segregation inc  | chr7q11.23 /// chr7q40  | 0                                    | transcription, DNA-dependent          | -1.34         | -1.36           | 1.21      | -1.00       | 1.27      | 1.19        | 1.22       | 1.09         | -1.80      | -1.74        | -1.75      | -1.47        |
| LOC441528 | uncharacterized LOC44152     | chrXp22.33              | 0                                    | ---                                   | 1.15          | 1.23            | -1.22     | -1.17       | 1.31      | 1.07        | -1.12      | -1.26        | -1.68      | -1.33        | -1.93      | -1.74        |
| LOC441528 | uncharacterized LOC44152     | chrXp22.33              | 0                                    | ---                                   | 1.29          | 1.07            | 1.07      | -1.32       | 1.24      | 1.35        | 1.45       | 1.08         | -1.40      | -1.30        | -1.43      | -1.56        |
| LOC442075 | uncharacterized LOC44207     | chr3p25.3               | 0                                    | ---                                   | -1.10         | -1.22           | 1.11      | 1.17        | -1.08     | -1.21       | 1.00       | -1.04        | -1.51      | -1.48        | -1.59      | -1.24        |
| LOC51145  | erythrocyte transmembrane    | chr9q33.3               | 0                                    | ---                                   | -1.10         | 1.97            | -1.02     | -3.10       | -6.28     | -2.12       | -6.19      | 1.56         | -1.22      | -2.78        | -1.34      | 1.04         |
| LOC541467 | uncharacterized LOC54146     | chr4q13.3               | 0                                    | ---                                   | 1.18          | 1.20            | 1.01      | -1.09       | -1.04     | 1.10        | -1.09      | -1.07        | -1.01      | 1.01         | -1.46      | -2.13        |
| LOC541471 | uncharacterized LOC54147     | chr2q13                 | 0                                    | ---                                   | 1.10          | -1.17           | -1.21     | -1.57       | -1.15     | 1.03        | 1.31       | 1.12         | 1.04       | -1.20        | 1.25       | -1.11        |
| LOC541472 | uncharacterized LOC54147     | chr7p21                 | 0                                    | Smooth_muscle_contraction // GenMAPP  | -1.15         | -1.50           | -6.01     | -1.50       | 1.48      | 1.81        | 1.77       | 4.08         | 6.13       | 9.75         | 3.79       | 1.73         |
| LOC550112 | uncharacterized LOC55011     | chr4q13.2               | 0                                    | ---                                   | 1.42          | 1.65            | -1.69     | -1.81       | 1.16      | 1.08        | -2.91      | -1.92        | 3.65       | 2.30         | 1.15       | 1.08         |
| LOC550643 | uncharacterized LOC55064     | chrXp11.1               | 0                                    | ---                                   | 1.11          | 1.09            | -1.06     | 1.08        | -1.10     | 1.06        | -1.22      | 1.03         | -1.49      | -1.30        | -1.74      | -1.85        |
| LOC553103 | uncharacterized LOC55310     | ---                     | 0                                    | ---                                   | -1.20         | -1.16           | 1.51      | 2.37        | 1.20      | 1.47        | 1.34       | 1.95         | -2.00      | -2.03        | -12.17     | -2.54        |
| LOC613037 | nuclear pore complex inter   | chr16p11.2 /// chr16q40 | 0                                    | ---                                   | 1.37          | 1.48            | 1.02      | -1.29       | -1.02     | 1.27        | -1.16      | -1.07        | -2.12      | -1.99        | -1.81      | -2.17        |
| LOC619207 | scavenger receptor protein   | chr10q26.3              | 0                                    | ---                                   | -1.10         | -1.53           | -2.47     | -1.07       | 1.21      | 1.12        | -1.53      | -1.38        | 1.74       | 2.00         | 1.51       | 2.13         |
| LOC642236 | FSHD region gene 1 pseud     | chr9q13                 | 0                                    | ---                                   | 1.13          | -1.12           | -1.15     | -1.22       | -1.32     | 1.13        | -1.51      | -1.20        | -1.78      | -1.36        | -1.84      | -2.67        |
| LOC642361 | uncharacterized LOC64236     | chr10q22.3              | 0                                    | ---                                   | -1.01         | -1.02           | -1.16     | 1.01        | -1.01     | -1.09       | -1.00      | 1.08         | -2.07      | -2.69        | -2.44      | -2.02        |
| LOC642533 | uncharacterized LOC64253     | chr16q24.3              | 0                                    | ---                                   | 1.06          | 1.05            | 1.14      | 1.44        | 1.08      | -1.46       | 1.17       | -1.01        | 1.74       | 2.34         | 1.84       | 1.78         |
| LOC642533 | uncharacterized LOC64253     | chr16q24.3              | 0                                    | ---                                   | 1.06          | 1.03            | -1.03     | 1.07        | 1.09      | 1.01        | -1.15      | -1.05        | -1.29      | -1.33        | -2.02      | -1.58        |
| LOC642852 | uncharacterized LOC64285     | chr21q22.3              | 0                                    | ---                                   | 1.29          | 1.00            | 1.01      | 1.21        | -1.06     | -1.06       | 1.13       | -1.15        | -4.32      | -2.49        | -2.19      | -3.76        |
| LOC642852 | uncharacterized LOC64285     | chr21q22.3              | 0                                    | ---                                   | 1.21          | 1.13            | 1.04      | 1.23        | 1.59      | 1.82        | -1.24      | -1.02        | -2.18      | -2.03        | -2.39      | -1.53        |
| LOC642852 | uncharacterized LOC64285     | chr21q22.3              | 0                                    | ---                                   | -1.03         | -1.27           | -1.01     | -1.04       | 1.22      | 1.07        | -1.35      | -1.06        | -1.81      | -1.81        | -1.57      | -1.24        |
| LOC642852 | uncharacterized LOC64285     | chr21q22.3              | 0                                    | ---                                   | 1.24          | 1.23            | -1.40     | -1.59       | 1.35      | 1.36        | -1.55      | -1.21        | -3.22      | -2.48        | -2.32      | -2.23        |
| LOC642852 | uncharacterized LOC64285     | chr21q22.3              | 0                                    | ---                                   | -1.16         | -1.12           | -1.06     | 1.29        | 1.14      | 1.08        | -1.07      | 1.23         | -2.74      | -2.72        | -2.97      | -2.29        |
| LOC643085 | uncharacterized LOC64308     | chr2q11.1               | 0                                    | ---                                   | 1.36          | 1.61            | 1.64      | 1.07        | 1.68      | -1.04       | -1.16      | -1.87        | -1.07      | -1.71        | 1.62       | 1.87         |
| LOC643401 | uncharacterized LOC64340     | chr5p14.1               | 0                                    | ---                                   | 1.32          | 1.08            | 1.23      | 1.15        | 1.11      | 1.13        | -1.09      | 1.01         | -3.07      | -3.24        | -9.21      | -9.28        |
| LOC643733 | caspase 4, apoptosis-related | chr11q22.3              | 0                                    | proteolysis                           | 1.21          | 1.56            | 1.33      | 1.16        | 1.38      | -1.34       | 1.00       | -1.09        | -1.02      | 1.20         | 1.05       | 1.14         |
| LOC643837 | uncharacterized LOC64383     | chr1p36.33              | 0                                    | ---                                   | -1.14         | -1.02           | -1.48     | -1.25       | 1.16      | -1.03       | -1.74      | 1.17         | -1.20      | -2.39        | 1.05       | -1.36        |
| LOC643837 | uncharacterized LOC64383     | chr1p36.33              | 0                                    | ---                                   | -1.12         | 1.02            | 1.11      | 1.31        | -1.05     | -1.10       | 1.19       | 1.13         | 1.53       | 1.34         | 2.10       | 2.04         |

| ID        | Gene Title                         | Chromosomal Location  | 1st Gene Ontology Biological Process        | Pathway                               | A2497 30 mins | A2497P' 30 mins | A2497 2 h | A2497P' 2 h | A2497 4 h | A2497P' 4 h | A2497 24 h | A2497P' 24 h | A2497 48 h | A2497P' 48 h | A2497 72 h | A2497P' 72 h |
|-----------|------------------------------------|-----------------------|---------------------------------------------|---------------------------------------|---------------|-----------------|-----------|-------------|-----------|-------------|------------|--------------|------------|--------------|------------|--------------|
| LOC643837 | uncharacterized LOC64383           | chr1p36.33            | 0                                           | ---                                   | 1.08          | 1.04            | 1.03      | -1.16       | 1.28      | 1.11        | -1.67      | -1.44        | -1.45      | -1.54        | -1.28      | -1.36        |
| LOC644135 | uncharacterized LOC64413           | chr6q23.3             | 0                                           | ---                                   | -1.03         | 1.86            | -1.00     | 1.23        | 1.86      | 2.27        | -2.48      | -1.75        | -1.11      | -1.38        | 7.19       | 3.57         |
| LOC644794 | uncharacterized LOC64479           | chr7q11.21            | 0                                           | ---                                   | -1.04         | -1.27           | 1.15      | 1.49        | -1.01     | 1.02        | -1.22      | 1.24         | -1.91      | -2.54        | -2.59      | -1.52        |
| LOC644852 | uncharacterized LOC64485           | chr1q44               | 0                                           | ---                                   | 1.02          | 2.93            | 2.88      | 2.44        | 1.16      | -1.74       | -1.25      | 1.92         | -1.92      | 1.27         | -2.72      | -1.36        |
| LOC645261 | PP565                              | chr5q14.3             | 0                                           | ---                                   | -1.08         | 1.06            | -1.54     | -1.56       | -6.68     | -3.33       | -3.78      | 1.29         | -1.25      | 1.49         | -1.21      | 1.15         |
| LOC645513 | uncharacterized LOC64551           | chr4q26               | 0                                           | ---                                   | 1.20          | 1.13            | 1.08      | 1.19        | 1.50      | 1.25        | 1.47       | 1.20         | -1.23      | -1.38        | 1.14       | 1.50         |
| LOC645513 | uncharacterized LOC64551           | chr4q26               | 0                                           | ---                                   | 1.38          | 1.38            | 1.14      | 1.97        | 1.10      | 1.44        | 1.29       | -1.03        | -2.72      | -2.67        | -1.23      | 1.38         |
| LOC645638 | WDNMI-like pseudogene              | chr17q23.1            | 0                                           | ---                                   | 1.19          | 1.25            | -1.01     | -1.27       | 1.01      | 1.07        | -1.03      | 1.05         | -1.36      | -1.33        | 1.43       | 1.15         |
| LOC645984 | uncharacterized LOC64598           | chr10p11.23           | 0                                           | ---                                   | 2.21          | 1.86            | 1.85      | 1.82        | -2.29     | -1.06       | -1.36      | -1.07        | 1.33       | 1.24         | 1.76       | -1.09        |
| LOC646014 | uncharacterized LOC64601           | chr17q24.1            | 0                                           | ---                                   | 1.37          | -1.13           | 1.20      | 1.30        | 1.34      | 1.40        | -1.20      | -1.28        | -2.21      | -1.96        | -1.70      | -1.18        |
| LOC646626 | uncharacterized LOC64662           | chr1p22.3             | 0                                           | ---                                   | -3.13         | -1.34           | -1.36     | -1.21       | -3.47     | -1.43       | -1.27      | -1.51        | 1.38       | 1.11         | -3.86      | -1.20        |
| LOC646762 | uncharacterized LOC64676           | chr7p14.3             | 0                                           | ---                                   | -1.02         | 1.07            | 1.09      | 1.24        | -1.04     | -1.14       | 1.11       | 1.09         | -1.47      | -1.44        | -1.25      | -1.41        |
| LOC646762 | uncharacterized LOC64676           | chr7p14.3             | 0                                           | ---                                   | -1.05         | -1.04           | 1.07      | -1.05       | 1.36      | 1.24        | -1.03      | -1.05        | -1.87      | -1.36        | -1.42      | -1.35        |
| LOC646778 | uncharacterized LOC64677           | chr18q12.1            | 0                                           | ---                                   | -2.02         | -1.33           | -1.12     | 1.42        | -1.62     | 1.04        | -1.01      | 1.37         | 1.07       | 1.04         | -1.00      | 1.21         |
| LOC646903 | uncharacterized LOC64690           | chr3q25.1             | 0                                           | ---                                   | -1.44         | -1.35           | 1.47      | 1.26        | -1.09     | -1.15       | 1.21       | 1.04         | -1.83      | -1.10        | -2.36      | -3.12        |
| LOC648987 | uncharacterized LOC64898           | chr5p12               | 0                                           | ---                                   | 1.03          | -1.07           | 1.05      | 1.19        | 1.15      | -1.00       | -1.01      | 1.13         | -2.50      | -2.53        | -1.90      | -1.53        |
| LOC652993 | uncharacterized LOC65299           | chr12q21              | 0                                           | ---                                   | -1.34         | -2.19           | 1.61      | 1.08        | 1.47      | 1.70        | 4.35       | 3.21         | -1.96      | -2.23        | 3.06       | 2.43         |
| LOC653375 | RCC1-like G exchanging factor      | chr7q11.23            | 0                                           | ---                                   | 1.09          | -1.18           | 1.09      | 1.11        | 1.22      | -1.49       | -1.81      | -1.26        | -2.73      | -1.49        | -2.21      | -1.27        |
| LOC653501 | zinc finger protein 658 pseudogene | chr9p12 /// chr9p13   | transcription, DNA-dependent                | ---                                   | 1.37          | 1.28            | 1.30      | 1.89        | 1.53      | -1.11       | -1.55      | -1.38        | -4.99      | -4.50        | -2.23      | -2.51        |
| LOC653562 | sodium- and chloride-dependent     | chr16p11.2 /// chrX   | creatine metabolic process                  | ---                                   | -1.08         | -1.13           | 1.07      | 1.07        | 1.12      | 1.05        | 1.37       | 1.06         | 2.01       | 2.32         | 1.34       | 1.74         |
| LOC654342 | lymphocyte-specific protein        | chr2p11.1             | 0                                           | ---                                   | 1.08          | 1.07            | -1.12     | 1.14        | -1.12     | -1.10       | 1.50       | 1.49         | 3.87       | 2.71         | 2.90       | 3.33         |
| LOC654433 | uncharacterized LOC65443           | chr2q13               | 0                                           | ---                                   | 1.80          | 1.11            | 1.52      | -6.73       | 2.46      | 1.22        | -1.80      | -1.10        | 1.60       | 1.43         | 5.21       | 3.56         |
| LOC654433 | uncharacterized LOC65443           | chr2q13               | 0                                           | ---                                   | -1.18         | -1.13           | 1.10      | 1.12        | 1.27      | 1.07        | -1.46      | -1.12        | -1.97      | -1.37        | -1.23      | 1.19         |
| LOC654780 | SFPQ                               | chr16q24.1            | 0                                           | ---                                   | 1.52          | 1.96            | -1.67     | 1.12        | 1.88      | 2.54        | 1.05       | 1.69         | -1.13      | 2.14         | 3.25       | 4.60         |
| LOC654841 | uncharacterized LOC65484           | chr2q36-q37           | 0                                           | ---                                   | 1.70          | 1.43            | 1.43      | -1.58       | -1.24     | 1.68        | -1.48      | -1.52        | -1.38      | -1.53        | 1.63       | 2.41         |
| LOC727820 | uncharacterized LOC72782           | chr1q21.1             | 0                                           | ---                                   | 1.15          | -1.06           | 1.23      | -1.12       | 1.07      | 1.05        | 1.18       | -1.04        | -1.49      | -1.57        | -1.95      | -2.46        |
| LOC727820 | uncharacterized LOC72782           | chr1q21.1             | 0                                           | ---                                   | 1.19          | 1.02            | -1.01     | -1.14       | 1.16      | 1.24        | 1.27       | 1.25         | -1.23      | -1.28        | -1.83      | -1.61        |
| LOC727916 | uncharacterized LOC72791           | chr6q12               | 0                                           | ---                                   | -1.05         | 1.16            | 1.36      | 1.51        | 1.10      | 1.10        | -1.30      | -1.18        | -1.80      | -2.26        | -1.48      | -1.13        |
| LOC727983 | putative POM121-like protein       | chr22q11.21 /// chr20 | 0                                           | ---                                   | -3.89         | -2.41           | -1.34     | -1.03       | -2.08     | -1.23       | 1.70       | -1.17        | 1.17       | 2.53         | -7.06      | -2.56        |
| LOC728012 | uncharacterized LOC72801           | chr6q16.3             | 0                                           | ---                                   | -2.04         | -2.44           | -6.70     | -1.49       | -2.08     | -1.87       | -3.88      | -1.64        | 1.57       | -2.21        | -3.57      | -4.54        |
| LOC728024 | chromosome X open reading frame    | chr8p11.23            | 0                                           | ---                                   | 1.11          | -1.04           | -1.08     | 1.10        | 1.11      | -1.08       | -1.29      | 1.01         | -2.19      | -1.76        | -1.60      | -1.80        |
| LOC728061 | hCG2003663                         | chr9q22.32            | 0                                           | ---                                   | 1.16          | 1.24            | 1.02      | 1.22        | 1.57      | 1.34        | 1.24       | -1.04        | -1.56      | -1.57        | -1.93      | -2.25        |
| LOC728431 | uncharacterized LOC72843           | chr1p34.3             | 0                                           | ---                                   | 1.07          | 1.02            | -1.01     | 1.07        | 1.24      | 1.04        | 1.21       | 1.33         | 3.47       | 2.83         | 1.97       | 2.72         |
| LOC728613 | programmed cell death 6 pseudogene | chr5p15.33            | 0                                           | ---                                   | 1.13          | 1.08            | 1.07      | 1.11        | -1.01     | -1.09       | 1.02       | 1.02         | 1.33       | 1.22         | 1.46       | 1.49         |
| LOC728613 | programmed cell death 6 pseudogene | chr5p15.33            | negative regulation of transcription from   | ---                                   | 1.33          | -1.02           | -1.04     | 1.15        | 1.14      | 1.54        | -1.11      | -1.06        | -1.18      | -1.02        | 1.13       | -1.07        |
| LOC728613 | programmed cell death 6 pseudogene | chr5p15.33            | negative regulation of transcription from   | ---                                   | 1.55          | 1.07            | 1.05      | -1.43       | 1.75      | -1.03       | -1.72      | 1.06         | -1.36      | 1.47         | 1.06       | 1.45         |
| LOC728613 | programmed cell death 6 pseudogene | chr5p15.33            | negative regulation of transcription from   | ---                                   | 1.05          | 1.07            | 1.03      | 1.10        | 1.02      | -1.08       | 1.12       | 1.02         | 2.07       | 2.01         | 1.90       | 1.83         |
| LOC728705 | uncharacterized LOC72870           | chr12q23.3            | 0                                           | ---                                   | 1.03          | -1.03           | -1.25     | 1.00        | -1.03     | 1.12        | -1.62      | -1.38        | -2.19      | -1.46        | -1.84      | -1.78        |
| LOC728730 | uncharacterized LOC72873           | chr2q22.1             | 0                                           | ---                                   | -1.03         | -1.08           | -1.22     | -1.16       | -1.19     | 1.07        | -1.30      | -1.18        | 1.91       | 1.64         | 1.44       | -1.09        |
| LOC728769 | uncharacterized LOC72876           | chr5q14.1             | 0                                           | ---                                   | -1.05         | -1.01           | 1.01      | -1.15       | 1.02      | 1.14        | -1.10      | 1.21         | -1.84      | -2.03        | -2.11      | -1.95        |
| LOC728819 | hCG1645220                         | chr2p21               | 0                                           | ---                                   | -1.11         | 1.02            | -1.01     | 1.13        | 1.24      | 1.19        | -1.30      | -1.26        | -1.85      | -1.52        | -2.00      | -2.08        |
| LOC728903 | uncharacterized LOC72890           | chr9p11.2 /// chr9q20 | 0                                           | ---                                   | -1.08         | -1.09           | -1.07     | -1.04       | 1.05      | 1.13        | -1.28      | -1.10        | -2.17      | -1.87        | -3.60      | -3.12        |
| LOC729020 | rcRPE /// ribulose-5-phosphate     | chr10q24.33 /// chr2  | carbohydrate metabolic process              | Pentose_Phosphate_Pathway // GenMAPP  | -1.02         | 1.02            | -1.05     | -1.01       | 1.01      | 1.03        | 1.03       | -1.05        | -1.41      | 1.03         | -1.18      | -1.29        |
| LOC729020 | rcRPE /// ribulose-5-phosphate     | chr10q24.33 /// chr2  | carbohydrate metabolic process              | Pentose_Phosphate_Pathway // GenMAPP  | 1.02          | 1.04            | -1.07     | -1.18       | 1.11      | -1.03       | 1.16       | -1.06        | 1.23       | 1.23         | 1.48       | 1.43         |
| LOC729059 | uncharacterized LOC72905           | chr1p36.12            | 0                                           | ---                                   | -2.98         | -2.36           | -1.20     | -1.43       | 2.51      | 2.55        | 3.04       | 2.63         | 1.47       | -1.38        | 2.00       | 1.51         |
| LOC729680 | uncharacterized LOC72968           | chr13q12.11           | 0                                           | ---                                   | 1.03          | -1.02           | -1.32     | -1.22       | 1.19      | -1.25       | 1.20       | 1.26         | -1.68      | -2.36        | -3.71      | -2.93        |
| LOC729852 | uncharacterized LOC72985           | chr7p21.3             | 0                                           | ---                                   | 1.19          | 1.09            | 1.05      | 1.09        | -1.00     | 1.17        | -1.11      | -1.28        | -1.92      | -1.32        | -1.81      | -1.86        |
| LOC730101 | uncharacterized LOC73010           | chr6p12.2             | 0                                           | ---                                   | 1.03          | -1.20           | -1.02     | 1.15        | -1.16     | 1.23        | -1.24      | -1.21        | -2.27      | -1.73        | -2.40      | -2.05        |
| LOC730102 | quinone oxidoreductase-like        | chr1q25.2             | 0                                           | ---                                   | 1.69          | 1.78            | -1.02     | -1.15       | 2.53      | 1.49        | -1.95      | -1.36        | -1.83      | -2.57        | -2.59      | -2.60        |
| LOC79015  | uncharacterized LOC79015           | chr20q13.12           | 0                                           | ---                                   | 1.19          | 1.29            | -1.38     | 1.38        | 1.06      | 1.05        | 2.37       | 1.80         | 2.48       | 2.06         | 1.88       | 2.88         |
| LOC79015  | uncharacterized LOC79015           | chr20q13.12           | 0                                           | ---                                   | -1.85         | -1.76           | -1.08     | 1.24        | -1.33     | -1.29       | 1.80       | 1.25         | 1.94       | 2.22         | 1.69       | 2.22         |
| LOC81691  | exonuclease NEF-sp                 | chr16p12.3            | nucleic acid phosphodiester bond hydrolysis | ---                                   | -1.03         | -1.11           | -1.07     | -1.17       | 1.09      | -1.03       | -1.20      | -1.10        | 1.26       | 1.20         | 1.03       | 1.16         |
| LOC90246  | uncharacterized LOC90246           | chr3q21.3             | 0                                           | ---                                   | 1.79          | 1.28            | 1.26      | 2.02        | 1.20      | 1.42        | 1.19       | 1.14         | -1.46      | -1.58        | -2.54      | -1.13        |
| LOC90784  | uncharacterized LOC90784           | chr2p11.2             | transcription, DNA-dependent                | RNA_transcription_Reactome // GenMAPP | 1.02          | -1.04           | 1.02      | 1.35        | 1.13      | -1.22       | 1.07       | 1.17         | -2.53      | -2.10        | -1.58      | -1.30        |
| LOC91548  | uncharacterized LOC91548           | chr1q32.3             | 0                                           | ---                                   | 1.07          | 1.38            | 1.05      | -1.02       | 1.03      | 1.12        | 1.10       | 1.10         | -1.09      | -1.21        | -1.61      | -1.56        |
| LOC92249  | uncharacterized LOC92249           | chrXq11.1             | 0                                           | ---                                   | -1.01         | -1.01           | 1.10      | 1.13        | 1.06      | 1.08        | 1.13       | 1.07         | -1.20      | -1.31        | -1.29      | -1.28        |
| LOC92249  | uncharacterized LOC92249           | chrXq11.1             | 0                                           | ---                                   | 1.12          | 1.12            | -1.04     | -1.25       | 1.26      | 1.14        | 1.02       | 1.51         | -1.61      | -1.68        | -1.55      | -1.52        |
| LOC93432  | maltase-glucoamylase (alpha)       | chr7q34               | carbohydrate metabolic process              | ---                                   | -1.75         | -6.93           | -1.76     | -1.27       | 1.11      | 1.99        | 1.05       | -1.28        | -1.50      | 1.06         | 2.98       | 1.78         |
| LOC93622  | Morf4 family associated protein    | chr4p16.1             | 0                                           | ---                                   | 1.03          | 1.04            | -1.05     | 1.03        | -1.05     | -1.02       | -1.15      | -1.02        | -1.35      | -1.16        | -1.13      | -1.14        |
| LOC96610  | BMS1 homolog, ribosome             | chr22q11.22           | 0                                           | ---                                   | -1.14         | -1.12           | 1.07      | 1.03        | 1.07      | -1.01       | -1.28      | -1.06        | -1.66      | -2.50        | -1.14      | -1.15        |
| LOC96610  | BMS1 homolog, ribosome             | chr22q11.22           | 0                                           | ---                                   | -1.11         | -1.17           | -1.07     | -1.15       | -1.06     | -1.03       | -1.15      | -1.04        | 1.37       | 1.43         | 1.19       | 1.19         |
| LONP1     | lon peptidase 1, mitochondrial     | chr19p13.2            | mitochondrial genome maintenance            | ---                                   | -1.13         | -1.18           | -1.05     | 1.10        | -1.05     | -1.16       | 1.45       | 1.34         | 1.48       | 1.44         | 1.21       | 1.63         |
| LONP2     | lon peptidase 2, peroxisomal       | chr16q12.1            | ATP catabolic process                       | ---                                   | 1.00          | -1.04           | 1.08      | 1.07        | 1.09      | -1.00       | 1.13       | 1.04         | 1.04       | 1.12         | 1.26       | 1.22         |
| LONRF1    | LON peptidase N-terminal           | chr8p23.1             | proteolysis                                 | ---                                   | -1.19         | -1.40           | 1.16      | 1.27        | 1.32      | 1.07        | -1.01      | -1.39        | -1.20      | 1.05         | 1.17       | -1.16        |
| LONRF3    | LON peptidase N-terminal           | chrXq24               | proteolysis                                 | ---                                   | -1.07         | -1.09           | -1.10     | -1.13       | 1.26      | 1.19        | 1.18       | -1.02        | 2.08       | 1.45         | 2.24       | 1.80         |
| LOX       | lysyl oxidase                      | chr5q23.2             | blood vessel development                    | ---                                   | 1.07          | 1.08            | 1.21      | -1.04       | 1.18      | 1.15        | 1.23       | 1.14         | 2.30       | 2.45         | 3.15       | 3.96         |

| ID          | Gene Title                                      | Chromosomal Location | 1st Gene Ontology Biological Process                                 | Pathway                                   | A2497 30 mins | A2497P' 30 mins | A2497 2 h | A2497P' 2 h | A2497 4 h | A2497P' 4 h | A2497 24 h | A2497P' 24 h | A2497 48 h | A2497P' 48 h | A2497 72 h | A2497P' 72 h |
|-------------|-------------------------------------------------|----------------------|----------------------------------------------------------------------|-------------------------------------------|---------------|-----------------|-----------|-------------|-----------|-------------|------------|--------------|------------|--------------|------------|--------------|
| LOX         | lysyl oxidase                                   | chr5q23.2            | blood vessel development                                             | ---                                       | 1.23          | -1.19           | 1.14      | 1.02        | 1.27      | 1.46        | 1.12       | 1.02         | 1.95       | 2.31         | 2.76       | 3.37         |
| LOX         | lysyl oxidase                                   | chr5q23.2            | blood vessel development                                             | ---                                       | 1.23          | 1.17            | 1.20      | -1.03       | -1.11     | 1.11        | -1.03      | 1.05         | 1.41       | 1.48         | 1.90       | 1.94         |
| LOXL1       | lysyl oxidase-like 1                            | chr15q22             | protein deamination                                                  | ---                                       | -1.16         | 1.16            | 2.24      | 1.71        | -1.27     | -2.14       | 1.68       | 1.45         | -1.56      | -1.42        | -2.56      | -1.31        |
| LOXL1-AS1   | LOXL1 antisense RNA 1                           | chr15q24.1           | 0                                                                    | ---                                       | 1.14          | 1.09            | 1.03      | -1.06       | 1.05      | 1.38        | -1.22      | -1.16        | -3.51      | -1.63        | -3.21      | -3.79        |
| LOXL2       | lysyl oxidase-like 2                            | chr8p21.3            | response to hypoxia                                                  | ---                                       | -1.09         | 1.12            | 1.28      | 1.79        | 1.15      | -1.01       | 1.17       | 1.10         | 1.48       | 1.54         | 2.50       | 4.05         |
| LOXL2       | lysyl oxidase-like 2                            | chr8p21.3            | response to hypoxia                                                  | ---                                       | 1.03          | 1.01            | 1.06      | 1.08        | 1.21      | 1.10        | 1.31       | 1.08         | 1.58       | 1.59         | 2.07       | 2.54         |
| LOXL2       | lysyl oxidase-like 2                            | chr8p21.3            | response to hypoxia                                                  | ---                                       | -1.20         | -1.39           | 1.22      | 1.54        | -1.46     | -1.43       | 1.05       | -1.45        | 1.78       | 1.76         | 2.51       | 3.55         |
| LPA         | lipoprotein, Lp(a)                              | chr6q26              | proteolysis                                                          | ---                                       | -1.52         | -1.34           | -2.79     | 1.16        | -2.72     | -1.42       | 3.30       | 2.10         | -1.18      | 2.39         | -2.39      | -1.18        |
| LPAR2       | lysophosphatidic acid receptor                  | chr19p12             | activation of MAPK activity                                          | ---                                       | 1.09          | 1.15            | 1.23      | 1.33        | -1.22     | -1.25       | -1.13      | -1.11        | -1.00      | -1.33        | 1.25       | 1.71         |
| LPAR2       | lysophosphatidic acid receptor                  | chr19p12             | activation of MAPK activity                                          | ---                                       | -1.91         | -1.15           | -1.45     | 1.29        | 1.26      | -1.02       | 1.11       | -1.12        | 1.75       | 1.47         | 1.08       | 1.51         |
| LPAR3       | lysophosphatidic acid receptor                  | chr1p22.3            | activation of MAPK activity                                          | ---                                       | 1.03          | -1.08           | 1.95      | 1.60        | 1.70      | 2.53        | -1.49      | -1.20        | 1.53       | 1.55         | 2.53       | 1.70         |
| LPCAT1      | lysophosphatidylcholine acyltransferase         | chr5p15.33           | lipid metabolic process                                              | ---                                       | -1.03         | -1.00           | -1.01     | 1.04        | 1.05      | -1.04       | 1.08       | 1.04         | 1.36       | 1.19         | 1.19       | 1.30         |
| LPCAT2      | lysophosphatidylcholine acyltransferase         | chr16q12.2           | lipid metabolic process                                              | ---                                       | 1.12          | 1.10            | 1.21      | 1.18        | 1.02      | 1.28        | -1.07      | 1.03         | -1.70      | -1.24        | -2.64      | -2.48        |
| LPCAT2      | lysophosphatidylcholine acyltransferase         | chr16q12.2           | lipid metabolic process                                              | ---                                       | 1.39          | 1.29            | 1.09      | -1.22       | -1.05     | -1.03       | -1.58      | 1.10         | -3.13      | -2.77        | -3.35      | -3.15        |
| LPCAT3      | lysophosphatidylcholine acyltransferase         | chr12p13             | lipid metabolic process                                              | ---                                       | -1.05         | -1.00           | -1.00     | 1.02        | 1.06      | 1.04        | 1.04       | -1.00        | -1.00      | 1.03         | 1.08       | 1.13         |
| LPCAT3      | lysophosphatidylcholine acyltransferase         | chr12p13             | phospholipid metabolic process                                       | ---                                       | 1.09          | 1.07            | 1.09      | 1.12        | 1.08      | -1.06       | 1.06       | 1.19         | 1.41       | 1.37         | 1.38       | 1.59         |
| LPGAT1      | lysophosphatidylglycerol acyltransferase        | chr1q32              | lipid metabolic process                                              | ---                                       | 1.20          | 1.24            | 1.13      | -1.02       | -1.06     | -1.08       | -1.05      | -1.07        | -1.41      | -1.46        | -1.30      | -1.42        |
| LPIN1       | lipin 1                                         | chr2p25.1            | negative regulation of transcription from RNA polymerase II promoter | ---                                       | 1.03          | 1.03            | 1.22      | 1.17        | 1.05      | -1.03       | 1.09       | 1.03         | -1.39      | -1.17        | 1.07       | 1.37         |
| LPIN1       | lipin 1                                         | chr2p25.1            | negative regulation of transcription from RNA polymerase II promoter | ---                                       | 1.06          | 1.04            | 1.10      | -1.02       | -1.11     | -1.01       | -1.15      | -1.15        | -1.30      | -1.21        | 1.11       | 1.30         |
| LPIN2       | lipin 2                                         | chr19p11.31          | transcription, DNA-dependent                                         | ---                                       | 1.11          | 1.02            | 1.07      | 1.19        | 1.03      | 1.11        | -1.09      | -1.14        | 1.14       | 1.22         | 1.20       | 1.38         |
| LPL         | lipoprotein lipase                              | chr8p22              | retinoid metabolic process                                           | Fatty_Acid_Degradation // GenMAPP // Stat | 1.09          | 1.03            | 1.07      | 1.12        | -1.10     | 1.02        | 1.15       | 1.02         | 1.30       | 1.58         | 1.33       | 1.44         |
| LPL         | lipoprotein lipase                              | chr8p22              | retinoid metabolic process                                           | Fatty_Acid_Degradation // GenMAPP // Stat | 1.10          | 1.07            | 1.04      | 1.02        | -1.05     | -1.02       | 1.08       | -1.19        | 1.37       | 1.48         | 1.78       | 1.91         |
| LPP         | LIM domain containing protein                   | chr3q28              | cell adhesion                                                        | ---                                       | -1.20         | -1.87           | 1.25      | 1.34        | -1.05     | 1.07        | 1.64       | 1.63         | -3.78      | -2.97        | -2.64      | -1.37        |
| LPP         | LIM domain containing protein                   | chr3q28              | cell adhesion                                                        | ---                                       | 1.12          | 1.12            | -1.06     | -1.09       | -1.22     | -1.07       | -1.24      | -1.20        | -1.34      | -1.29        | -1.16      | -1.43        |
| LPP         | LIM domain containing protein                   | chr3q28              | cell adhesion                                                        | ---                                       | 1.10          | 1.02            | 1.01      | -1.08       | 1.03      | 1.10        | -1.04      | -1.18        | -1.21      | -1.20        | -1.15      | -1.25        |
| LPFR1       | lipid phosphate phosphatase                     | chr9q31.1            | metabolic process                                                    | ---                                       | -1.60         | -6.12           | -4.53     | -1.41       | -1.01     | -3.08       | 1.86       | -1.05        | 14.65      | 12.93        | 1.06       | 6.44         |
| LPFR2       | lipid phosphate phosphatase                     | chr19p13.2           | metabolic process                                                    | ---                                       | 1.16          | -1.10           | -1.04     | -1.02       | -1.18     | -1.06       | -1.05      | -1.03        | 1.59       | 1.50         | 1.68       | 2.43         |
| LPFR2       | lipid phosphate phosphatase                     | chr19p13.2           | metabolic process                                                    | ---                                       | 1.19          | 1.06            | 1.12      | 1.44        | -1.20     | 1.00        | -1.33      | -1.02        | 1.50       | 1.63         | 1.60       | 2.19         |
| LPFR4       | lipid phosphate phosphatase                     | chr1p21.2            | axogenesis                                                           | ---                                       | 1.22          | 1.29            | 1.03      | -1.03       | -1.08     | -1.01       | -1.37      | 1.11         | -5.85      | -2.48        | -3.42      | -3.41        |
| LPXN        | leupaxin                                        | chr11q12.1           | transcription, DNA-dependent                                         | ---                                       | -1.03         | -1.35           | 1.41      | 1.10        | -1.08     | -1.17       | 1.15       | 1.48         | -1.51      | -1.43        | -1.09      | -1.34        |
| LRBA        | LPS-responsive vesicle trafficking              | chr4q31.3            | 0                                                                    | ---                                       | -1.01         | 1.02            | -1.04     | -1.06       | -1.05     | 1.01        | -1.01      | -1.01        | -1.31      | -1.12        | -1.96      | -1.92        |
| LRBA        | LPS-responsive vesicle trafficking              | chr4q31.3            | 0                                                                    | ---                                       | 1.56          | 1.41            | -1.09     | -1.24       | -1.07     | 1.06        | -1.08      | -1.11        | -1.59      | -1.16        | -1.96      | -1.94        |
| LRCH1       | leucine-rich repeats and cell adhesion molecule | chr13q14.11          | 0                                                                    | ---                                       | 1.34          | 1.47            | -1.00     | -1.07       | 1.34      | 1.08        | 1.22       | 1.07         | 1.23       | 1.12         | 1.57       | 1.19         |
| LRCH3       | leucine-rich repeats and cell adhesion molecule | chr3q29              | 0                                                                    | ---                                       | -1.32         | -1.67           | 1.60      | 1.14        | 1.19      | 1.30        | -1.07      | -1.23        | -2.11      | -1.78        | -1.63      | -2.27        |
| LRCH3       | leucine-rich repeats and cell adhesion molecule | chr3q29              | 0                                                                    | ---                                       | 1.01          | -1.01           | 1.02      | 1.07        | -1.14     | -1.11       | -1.12      | -1.12        | -2.98      | -2.56        | -3.44      | -3.25        |
| LRCH3       | leucine-rich repeats and cell adhesion molecule | chr3q29              | 0                                                                    | ---                                       | 1.06          | -1.12           | 1.10      | -1.09       | 1.05      | 1.27        | -1.19      | -1.21        | -2.53      | -2.05        | -2.57      | -2.01        |
| LRCH3       | leucine-rich repeats and cell adhesion molecule | chr3q29              | 0                                                                    | ---                                       | -1.01         | 1.18            | -1.10     | -1.16       | 1.13      | 1.18        | 1.24       | 1.24         | -1.91      | -1.43        | -3.10      | -3.07        |
| LRCH4 /// S | leucine-rich repeats and cell adhesion molecule | chr7q22 /// chr7q22  | transcription, DNA-dependent                                         | ---                                       | 1.13          | -1.77           | -1.79     | 1.43        | -1.31     | 1.28        | -1.79      | -1.25        | 1.18       | 1.40         | 1.75       | 2.45         |
| LRG1        | leucine-rich alpha-2-glycoprotein               | chr19p13.3           | brown fat cell differentiation                                       | ---                                       | -1.34         | 1.63            | 1.01      | 1.22        | 1.02      | 1.79        | 1.48       | -1.01        | 6.43       | 4.44         | 5.32       | 5.53         |
| LRGUK       | leucine-rich repeats and cell adhesion molecule | chr7q33              | phosphorylation                                                      | ---                                       | 2.70          | 2.42            | -1.46     | -1.44       | 1.00      | -1.53       | -1.04      | 1.03         | 1.95       | 2.08         | 1.29       | 1.66         |
| LRIF1       | ligand dependent nuclear import                 | chr1p13.3            | transcription, DNA-dependent                                         | ---                                       | 1.26          | 1.27            | 1.14      | 1.05        | 1.08      | 1.20        | -1.70      | -1.30        | 1.04       | 1.23         | 1.48       | 1.34         |
| LRIG2       | leucine-rich repeats and cell adhesion molecule | chr1p13.1            | 0                                                                    | ---                                       | -1.23         | 1.44            | 2.25      | 1.22        | 3.45      | 5.84        | 2.95       | 1.97         | 1.55       | -1.11        | 1.70       | 2.30         |
| LRIG2       | leucine-rich repeats and cell adhesion molecule | chr1p13.1            | 0                                                                    | ---                                       | 1.09          | 1.31            | 1.13      | -1.03       | -1.50     | -1.24       | -1.11      | 1.07         | 1.03       | 1.16         | 1.82       | 1.68         |
| LRIG3       | leucine-rich repeats and cell adhesion molecule | chr12q14.1           | protein phosphorylation                                              | ---                                       | 1.44          | 1.21            | -1.11     | -1.16       | -1.39     | -1.06       | -1.05      | -1.05        | -2.00      | -2.33        | -1.10      | -1.65        |
| LRP1        | low density lipoprotein receptor                | chr12q13.3           | retinoid metabolic process                                           | Statin_Pathway_PharmGKB // GenMAPP        | 1.23          | 1.06            | -1.32     | -1.24       | 1.18      | 1.14        | 1.49       | 1.32         | -1.19      | 1.07         | -1.13      | 1.36         |
| LRP1        | low density lipoprotein receptor                | chr12q13.3           | retinoid metabolic process                                           | Statin_Pathway_PharmGKB // GenMAPP        | -1.05         | -1.26           | 1.15      | 1.18        | 1.51      | 2.20        | 1.17       | 1.36         | -1.01      | 1.14         | 1.25       | 1.60         |
| LRP10       | low density lipoprotein receptor                | chr14q11.2           | lipid metabolic process                                              | ---                                       | -1.06         | 1.02            | 1.30      | 1.35        | 1.01      | -1.06       | -1.11      | -1.01        | 1.24       | 1.21         | 1.51       | 1.82         |
| LRP10       | low density lipoprotein receptor                | chr14q11.2           | lipid metabolic process                                              | ---                                       | -1.28         | -1.34           | 1.06      | -1.03       | 1.14      | -1.17       | 1.05       | 1.18         | -1.11      | -1.05        | 1.19       | 1.15         |
| LRP12       | low density lipoprotein receptor                | chr8q22.2            | endocytosis                                                          | ---                                       | 1.43          | 2.06            | 1.44      | 1.27        | 1.14      | 1.26        | -1.99      | -1.06        | -4.28      | -2.49        | 1.15       | -1.71        |
| LRP1B       | low density lipoprotein receptor                | chr2q21.2            | endocytosis                                                          | ---                                       | -1.09         | -1.65           | 1.03      | 1.02        | -1.17     | -1.03       | 1.12       | -1.30        | -2.86      | -1.90        | -5.38      | -2.52        |
| LRP3        | low density lipoprotein receptor                | chr19q13.11          | endocytosis                                                          | ---                                       | 1.23          | 1.17            | -1.05     | 1.15        | 1.13      | -1.11       | 1.10       | 1.04         | -1.06      | -1.03        | -1.29      | -1.43        |
| LRP4        | low density lipoprotein receptor                | chr11p11.2           | kidney development                                                   | ---                                       | 1.18          | 1.10            | 1.05      | 1.01        | 1.04      | 1.09        | -1.00      | 1.07         | -1.34      | -1.04        | -1.35      | -1.19        |
| LRP5        | low density lipoprotein receptor                | chr11q13.4           | gastrulation with mouth forming second                               | ---                                       | -1.09         | -1.10           | 1.03      | 1.20        | 1.10      | 1.00        | 1.41       | 1.43         | 1.55       | 1.31         | 1.22       | 1.39         |
| LRP6        | low density lipoprotein receptor                | chr12p13.2           | gastrulation with mouth forming second                               | ---                                       | -1.08         | -1.01           | 1.00      | 1.09        | -1.02     | 1.04        | 1.31       | 1.13         | -1.37      | -1.77        | 1.05       | -1.16        |
| LRP8        | low density lipoprotein receptor                | chr1p34              | negative regulation of transcription from RNA polymerase II promoter | ---                                       | 1.06          | 1.04            | 1.03      | 1.19        | 1.16      | 1.15        | -1.10      | -1.09        | 1.36       | 1.31         | 1.57       | 1.75         |
| LRP8        | low density lipoprotein receptor                | chr1p34              | negative regulation of transcription from RNA polymerase II promoter | ---                                       | 1.08          | 1.06            | 1.04      | 1.05        | 1.13      | 1.19        | -1.11      | -1.16        | 1.51       | 1.53         | 2.01       | 1.89         |
| LRPAP1      | low density lipoprotein receptor                | chr4p16.3            | protein folding                                                      | ---                                       | 1.06          | -1.16           | 1.24      | 1.32        | 1.03      | 1.29        | -1.15      | 1.01         | -1.83      | -2.21        | -2.08      | -2.11        |
| LRPPRC      | leucine-rich pentatricopeptide repeat           | chr2p21              | negative regulation of mitochondrial RNA processing                  | ---                                       | 1.58          | 1.36            | -1.02     | 1.03        | 1.65      | 1.36        | 1.23       | -1.17        | -2.04      | -2.09        | -2.06      | -1.83        |
| LRPPRC      | leucine-rich pentatricopeptide repeat           | chr2p21              | negative regulation of mitochondrial RNA processing                  | ---                                       | 1.01          | 1.08            | -1.00     | 1.05        | 1.07      | 1.05        | -1.04      | -1.04        | -1.18      | -1.18        | -1.35      | -1.44        |
| LRPPRC      | leucine-rich pentatricopeptide repeat           | chr2p21              | negative regulation of mitochondrial RNA processing                  | ---                                       | 1.08          | -1.06           | 1.14      | 1.03        | -1.04     | 1.23        | -1.56      | -1.24        | -1.74      | -1.35        | -1.67      | -1.75        |
| LRRC1       | leucine rich repeat containing GTPase           | chr6p12.1            | 0                                                                    | ---                                       | -1.12         | -1.06           | 1.02      | -1.05       | 1.01      | 1.04        | 1.07       | 1.03         | -1.53      | -1.51        | -1.58      | -1.72        |
| LRRC16A     | leucine rich repeat containing GTPase           | chr6p22.2            | actin filament organization                                          | ---                                       | 1.03          | 1.08            | 1.02      | -1.02       | 1.15      | -1.03       | 1.06       | -1.00        | -1.52      | -1.24        | -1.33      | -1.59        |
| LRRC16A     | leucine rich repeat containing GTPase           | chr6p22.2            | actin filament organization                                          | ---                                       | 1.02          | 1.17            | -1.09     | -1.03       | 1.08      | 1.05        | -1.07      | -1.04        | -1.74      | -1.32        | -1.31      | -1.50        |
| LRRC23      | leucine rich repeat containing GTPase           | chr12p13             | 0                                                                    | ---                                       | -1.06         | -1.18           | 1.07      | 1.20        | 1.08      | 1.06        | 1.24       | -1.04        | 2.12       | 1.74         | 1.41       | 1.50         |
| LRRC27      | leucine rich repeat containing GTPase           | chr10q26.3           | 0                                                                    | ---                                       | 1.71          | 1.51            | 2.10      | 2.07        | -1.55     | -1.36       | -1.64      | 1.17         | 1.09       | 1.39         | -2.07      | -1.63        |
| LRRC32      | leucine rich repeat containing GTPase           | chr11q13.5-q14       | positive regulation of gene expression                               | ---                                       | 1.86          | 2.00            | -1.07     | 7.59        | 1.48      | 1.14        | 2.09       | 1.36         | -1.45      | -2.48        | 3.18       | 2.15         |



| ID          | Gene Title                             | Chromosomal Location | 1st Gene Ontology Biological Process         | Pathway                               | A2497 30 mins | A2497P' 30 mins | A2497 2 h | A2497P' 2 h | A2497 4 h | A2497P' 4 h | A2497 24 h | A2497P' 24 h | A2497 48 h | A2497P' 48 h | A2497 72 h | A2497P' 72 h |
|-------------|----------------------------------------|----------------------|----------------------------------------------|---------------------------------------|---------------|-----------------|-----------|-------------|-----------|-------------|------------|--------------|------------|--------------|------------|--------------|
| LTN1        | listerin E3 ubiquitin protein          | chr21q22.11          | protein ubiquitination                       | ---                                   | -1.26         | -1.21           | 1.12      | -1.02       | 1.13      | 1.04        | 1.15       | 1.20         | 1.06       | 1.28         | 1.29       | 1.35         |
| LTV1        | LTV1 homolog (S. cerevisiae)           | chr6q24.2            | 0                                            | ---                                   | 1.17          | 1.08            | 1.08      | 1.05        | -1.10     | 1.01        | -1.18      | -1.00        | -1.16      | -1.22        | 1.13       | 1.11         |
| LTV1        | LTV1 homolog (S. cerevisiae)           | chr6q24.2            | 0                                            | ---                                   | 1.42          | -1.22           | 1.21      | 1.55        | -1.29     | -1.41       | -1.75      | -1.53        | 1.36       | -1.04        | 2.59       | 2.09         |
| LUC7L       | LUC7-like (S. cerevisiae)              | chr16p13.3           | negative regulation of striated muscle tis   | ---                                   | -1.19         | -1.16           | 1.04      | 1.01        | 1.05      | 1.01        | -1.16      | 1.01         | -1.41      | -1.67        | -1.42      | -1.18        |
| LUC7L       | LUC7-like (S. cerevisiae)              | chr16p13.3           | negative regulation of striated muscle tis   | ---                                   | -1.17         | -1.13           | 1.06      | -1.03       | 1.18      | 1.01        | -1.15      | -1.06        | -1.58      | -1.70        | -1.39      | -1.27        |
| LUC7L       | LUC7-like (S. cerevisiae)              | chr16p13.3           | negative regulation of striated muscle tis   | ---                                   | 1.34          | 1.45            | 1.12      | 1.08        | 1.06      | -1.01       | 1.17       | -1.00        | -1.68      | -1.56        | -1.42      | -1.25        |
| LUC7L       | LUC7-like (S. cerevisiae)              | chr16p13.3           | negative regulation of striated muscle tis   | ---                                   | -1.12         | -1.19           | 1.02      | 1.03        | 1.09      | -1.08       | -1.05      | -1.03        | -1.41      | -1.35        | -1.38      | -1.27        |
| LUC7L       | LUC7-like (S. cerevisiae)              | chr16p13.3           | negative regulation of striated muscle tis   | ---                                   | -1.04         | -1.09           | 1.01      | -1.03       | 1.10      | -1.03       | -1.01      | 1.00         | -1.81      | -2.03        | -2.00      | -1.62        |
| LUC7L2      | LUC7-like 2 (S. cerevisiae)            | chr7q34              | 0                                            | ---                                   | 1.02          | -1.03           | 1.03      | -1.13       | 1.01      | 1.08        | -1.04      | -1.11        | -1.63      | -1.42        | -1.64      | -2.38        |
| LUC7L2      | LUC7-like 2 (S. cerevisiae)            | chr7q34              | 0                                            | ---                                   | -1.11         | -1.16           | 1.09      | 1.07        | -1.06     | 1.03        | -1.04      | 1.15         | -1.64      | -1.33        | -1.36      | -1.43        |
| LUC7L3      | LUC7-like 3 (S. cerevisiae)            | chr17q21.33          | mRNA processing                              | ---                                   | -1.06         | -1.05           | 1.01      | 1.06        | -1.02     | 1.01        | 1.02       | 1.03         | 1.01       | -1.07        | -1.15      | -1.03        |
| LUC7L3      | LUC7-like 3 (S. cerevisiae)            | chr17q21.33          | mRNA processing                              | ---                                   | 1.28          | 1.32            | 1.03      | 1.11        | 1.08      | 1.14        | -1.27      | -1.22        | -1.52      | -1.55        | -1.99      | -1.60        |
| LUC7L3      | LUC7-like 3 (S. cerevisiae)            | chr17q21.33          | mRNA processing                              | ---                                   | -1.14         | 1.08            | 1.08      | 1.15        | -1.04     | -1.18       | 1.11       | 1.11         | -1.17      | -1.26        | -1.24      | -1.06        |
| LUC7L3      | LUC7-like 3 (S. cerevisiae)            | chr17q21.33          | mRNA processing                              | ---                                   | -1.02         | -1.01           | -1.06     | 1.14        | -1.11     | 1.04        | -1.29      | -1.06        | -1.29      | -1.17        | -1.23      | -1.12        |
| LUC7L3      | LUC7-like 3 (S. cerevisiae)            | chr17q21.33          | mRNA processing                              | ---                                   | 1.40          | -1.02           | 1.32      | -1.05       | 1.27      | 1.18        | -1.75      | -1.31        | -2.37      | -2.69        | -2.68      | -2.46        |
| LUC7L3      | LUC7-like 3 (S. cerevisiae)            | chr17q21.33          | mRNA processing                              | ---                                   | 1.03          | 1.11            | -1.03     | 1.04        | 1.05      | -1.07       | -1.24      | -1.35        | -1.71      | -1.67        | -2.37      | -2.37        |
| LUM         | lumican                                | chr12q21.3-q22       | carbohydrate metabolic process               | ---                                   | 1.06          | 1.11            | -1.06     | -1.06       | -1.08     | 1.11        | -1.25      | -1.14        | -1.42      | -1.02        | -1.56      | -1.53        |
| LURAP1      | leucine rich adaptor protein           | chr1p34              | positive regulation of cytokine production   | ---                                   | -2.41         | -4.62           | -1.32     | -1.24       | 4.18      | 2.52        | -1.38      | -1.21        | 3.06       | 1.59         | 2.79       | 2.95         |
| LUZP1       | leucine zipper protein 1               | chr1p36              | ventricular septum development               | ---                                   | -1.07         | -1.08           | 1.09      | 1.07        | 1.07      | -1.01       | 1.10       | 1.24         | 1.39       | 1.18         | 1.17       | 1.27         |
| LUZP1       | leucine zipper protein 1               | chr1p36              | ventricular septum development               | ---                                   | 1.05          | 1.02            | -1.03     | 1.10        | -1.01     | 1.04        | 1.05       | 1.08         | 1.38       | 1.29         | 1.31       | 1.35         |
| LUZP1       | leucine zipper protein 1               | chr1p36              | ventricular septum development               | ---                                   | -1.12         | -1.02           | 1.02      | 1.04        | -1.02     | -1.08       | 1.02       | -1.16        | 1.33       | 1.24         | 1.39       | 1.34         |
| LUZP2       | leucine zipper protein 2               | chr11p14.3           | 0                                            | ---                                   | -1.01         | -1.15           | -1.05     | -1.10       | 1.14      | 1.19        | -1.34      | -1.01        | -1.96      | -1.42        | -2.58      | -2.23        |
| LUZP6 /// M | leucine zipper protein 6 ///           | chr7q33              | regulation of translation                    | ---                                   | -1.09         | -1.01           | -1.07     | 1.07        | -1.24     | -1.05       | -1.17      | -1.10        | -1.02      | 1.13         | -1.05      | -1.05        |
| LY6D        | lymphocyte antigen 6 complex           | chr8q24              | cell adhesion                                | ---                                   | 1.03          | 1.25            | -1.20     | -1.09       | 1.00      | 1.08        | -1.03      | -1.20        | -1.25      | -1.57        | -2.16      | -1.80        |
| LY6G5C      | lymphocyte antigen 6 complex           | chr6p21.33           | 0                                            | ---                                   | 1.07          | -1.04           | -1.05     | 1.03        | -1.17     | -1.44       | -1.35      | -1.02        | -1.74      | -2.23        | -2.05      | -1.95        |
| LY6K        | lymphocyte antigen 6 complex           | chr8q24.3            | 0                                            | ---                                   | -1.03         | -1.03           | -1.12     | -1.05       | 1.01      | -1.01       | 1.05       | 1.07         | 1.14       | 1.12         | 1.27       | 1.28         |
| LY75        | lymphocyte antigen 75                  | chr2q24              | endocytosis                                  | ---                                   | -1.44         | 1.13            | 1.78      | 1.39        | 1.23      | 1.04        | 1.40       | 1.50         | 1.11       | -1.05        | -2.17      | -2.40        |
| LY86-AS1    | LY86 antisense RNA 1                   | chr6p25.1            | 0                                            | ---                                   | -1.91         | -2.69           | 5.81      | 14.17       | -1.72     | 1.51        | -1.79      | -3.45        | 9.33       | 6.47         | 2.78       | 2.21         |
| LYAR        | Lyl1 antibody reactive                 | chr4p16.3            | 0                                            | ---                                   | -1.21         | -1.09           | 1.02      | -1.08       | 1.14      | 1.03        | 1.16       | 1.07         | 1.41       | 1.16         | 1.71       | 1.64         |
| LYAR        | Lyl1 antibody reactive                 | chr4p16.3            | 0                                            | ---                                   | -1.01         | 1.05            | -1.00     | -1.09       | -1.08     | -1.04       | -1.29      | -1.09        | 1.37       | 1.22         | 1.64       | 1.44         |
| LYG1        | lysozyme G-like 1                      | chr2q11.2            | metabolic process                            | ---                                   | -1.97         | -2.73           | -1.13     | 1.13        | 1.21      | -1.20       | 1.04       | 1.14         | 1.10       | -1.49        | 1.66       | 2.16         |
| LYN         | v-yes-1 Yamaguchi sarcoma              | chr8q13              | B cell homeostasis                           | ---                                   | -1.10         | -1.06           | 1.04      | 1.25        | 1.03      | 1.08        | -1.10      | -1.14        | -1.02      | 1.07         | 1.24       | 1.11         |
| LYN         | v-yes-1 Yamaguchi sarcoma              | chr8q13              | B cell homeostasis                           | ---                                   | 1.11          | -1.01           | 1.07      | 1.11        | -1.00     | 1.28        | 1.06       | 1.16         | -1.02      | -1.03        | 1.21       | 1.16         |
| LYPD1       | LY6/PLAUR domain containing            | chr2q21.2            | 0                                            | GPCRDB_Class_A_Rhodopsin-like2 // Gen | -1.16         | -1.22           | 1.03      | 1.04        | 1.11      | 1.05        | 1.18       | 1.14         | 1.37       | 1.48         | 1.55       | 1.40         |
| LYPD3       | LY6/PLAUR domain containing            | chr19q13.31          | cellular component movement                  | ---                                   | 1.27          | 1.43            | -1.02     | 1.20        | 1.22      | -1.11       | 1.13       | 1.20         | 4.80       | 3.24         | 3.01       | 1.92         |
| LYPD6       | LY6/PLAUR domain containing            | chr2q23.2            | 0                                            | ---                                   | -1.19         | -1.11           | -1.12     | -1.13       | -1.29     | 1.02        | -1.12      | -1.37        | -1.58      | -1.55        | -1.01      | -1.01        |
| LYPD6B      | LY6/PLAUR domain containing            | chr2q23.2            | 0                                            | ---                                   | -1.05         | -1.14           | -1.13     | 1.05        | -1.19     | -1.24       | 1.14       | 1.09         | -1.28      | -1.29        | -2.22      | -2.47        |
| LYPLA2      | lysophospholipase II                   | chr1p36.11           | lipid metabolic process                      | ---                                   | -1.05         | 1.01            | -1.02     | 1.25        | -1.06     | -1.40       | 1.07       | -1.02        | 1.21       | 1.68         | -1.36      | -1.13        |
| LYPLA2      | lysophospholipase II                   | chr1p36.11           | lipid metabolic process                      | ---                                   | -1.26         | -1.22           | -1.05     | -1.15       | 1.08      | -1.10       | -1.15      | -1.02        | 1.03       | -1.04        | 1.08       | 1.08         |
| LYPLA2      | lysophospholipase II                   | chr1p36.11           | lipid metabolic process                      | ---                                   | -1.19         | -1.19           | 1.17      | 1.26        | -1.20     | -1.16       | 1.01       | -1.13        | -1.16      | -1.17        | 1.25       | 1.19         |
| LYPLAL1     | lysophospholipase-like 1               | chr1q41              | protein depalmitoylation                     | ---                                   | 1.02          | 1.02            | -1.01     | -1.08       | 1.05      | -1.02       | -1.08      | -1.02        | -1.37      | -1.42        | -1.00      | -1.09        |
| LYPLAL1     | lysophospholipase-like 1               | chr1q41              | protein depalmitoylation                     | ---                                   | -1.13         | -1.07           | 1.02      | 1.15        | -1.06     | -1.14       | -1.36      | -1.17        | -2.92      | -2.25        | -1.49      | -1.45        |
| LYRM1       | LYR motif containing 1                 | chr16p11.2           | 0                                            | ---                                   | 1.10          | 1.07            | -1.29     | -1.05       | -1.40     | -1.20       | -1.14      | -1.04        | 1.08       | 1.14         | 1.14       | 1.22         |
| LYRM2       | LYR motif containing 2                 | chr6q15              | 0                                            | ---                                   | 1.01          | -1.12           | 1.03      | -1.02       | 1.05      | 1.11        | 1.01       | 1.04         | -1.67      | -1.45        | -1.92      | -1.59        |
| LYRM2       | LYR motif containing 2                 | chr6q15              | 0                                            | ---                                   | -1.07         | -1.05           | -1.02     | -1.16       | 1.06      | 1.03        | -1.15      | -1.06        | -1.80      | -1.80        | -1.34      | -1.86        |
| LYRM2       | LYR motif containing 2                 | chr6q15              | 0                                            | ---                                   | -1.12         | -1.11           | 1.00      | -1.06       | 1.09      | 1.05        | -1.02      | -1.03        | -1.57      | -1.56        | -1.60      | -1.44        |
| LYRM2       | LYR motif containing 2                 | chr6q15              | 0                                            | ---                                   | 1.01          | 1.12            | -1.18     | -1.19       | 1.07      | 1.03        | 1.12       | 1.26         | -1.65      | -1.74        | -1.20      | -1.76        |
| LYRM4       | LYR motif containing 4                 | chr6p25.1            | small molecule metabolic process             | ---                                   | -1.03         | -1.09           | -1.05     | -1.04       | -1.08     | -1.19       | 1.21       | 1.38         | 1.11       | 1.04         | 1.18       | 1.29         |
| LYRM5       | LYR motif containing 5                 | chr12p12.1           | 0                                            | ---                                   | 1.10          | 1.07            | -1.04     | -1.05       | -1.08     | -1.04       | -1.08      | -1.03        | -1.59      | -1.44        | -1.61      | -1.74        |
| LYRM7       | LYR motif containing 7                 | chr5q23.3            | 0                                            | ---                                   | -1.01         | -1.12           | -1.02     | 1.11        | 1.55      | 1.54        | -1.04      | -1.31        | -2.18      | -2.11        | -2.40      | -2.36        |
| LYRM7       | LYR motif containing 7                 | chr5q23.3            | 0                                            | ---                                   | 1.00          | 1.09            | 1.05      | -1.14       | -1.08     | -1.07       | -1.22      | -1.03        | -3.55      | -3.23        | -3.39      | -3.03        |
| LYRM7       | LYR motif containing 7                 | chr5q23.3            | 0                                            | ---                                   | 1.10          | 1.01            | 1.08      | 1.02        | -1.02     | 1.09        | -1.41      | -1.26        | -3.15      | -3.02        | -3.15      | -3.15        |
| LYRM7       | LYR motif containing 7                 | chr5q23.3            | 0                                            | ---                                   | 1.01          | -1.07           | 1.02      | -1.07       | -1.16     | 1.02        | -1.41      | 1.04         | -3.40      | -3.05        | -3.14      | -2.92        |
| LYRM9       | LYR motif containing 9                 | chr17q11.2           | 0                                            | ---                                   | 1.03          | 1.08            | 1.12      | 1.15        | -1.06     | 1.15        | -1.01      | 1.09         | -1.10      | -1.44        | -1.77      | -1.56        |
| LYSMD1      | LysM, putative peptidoglycan           | chr1q21.3            | cell wall macromolecule catabolic process    | ---                                   | -1.02         | -1.08           | 1.08      | 1.12        | -1.08     | -1.01       | 1.34       | 1.34         | 1.09       | 1.33         | 1.54       | 1.08         |
| LYSMD2      | LysM, putative peptidoglycan           | chr15q21.2           | cell wall macromolecule catabolic process    | ---                                   | 1.07          | 1.01            | 1.18      | 1.16        | 1.01      | 1.04        | -1.20      | -1.26        | -2.04      | -1.71        | -1.33      | -1.73        |
| LYSMD4      | LysM, putative peptidoglycan           | chr15q26.3           | cell wall macromolecule catabolic process    | ---                                   | 1.08          | 1.01            | 1.17      | 1.39        | -1.05     | 1.09        | 1.11       | 1.09         | -1.03      | -1.12        | -1.44      | -1.35        |
| LYST        | lysosomal trafficking regulator        | chr1q42.1-q42.2      | neutrophil mediated immunity                 | ---                                   | -1.03         | 1.18            | -1.31     | -1.29       | 1.04      | -1.03       | 1.03       | -1.16        | -2.26      | -1.94        | -1.41      | -1.53        |
| LZIC        | leucine zipper and CTNBB               | chr1p36.22           | central nervous system development           | ---                                   | -1.07         | -1.09           | 1.09      | 1.07        | 1.11      | -1.01       | 1.02       | 1.08         | 1.62       | 1.62         | 1.55       | 2.01         |
| LZTFL1      | leucine zipper transcription           | chr3p21.3            | establishment of protein localization to org | ---                                   | -1.03         | 1.12            | -1.02     | -1.09       | -1.16     | -1.14       | 1.07       | -1.20        | -1.99      | -1.99        | -1.77      | -2.07        |
| LZTFL1      | leucine zipper transcription           | chr3p21.3            | establishment of protein localization to org | ---                                   | 1.01          | -1.13           | 1.46      | 1.99        | -1.07     | -1.03       | 1.02       | 1.18         | -1.67      | -2.10        | -2.07      | -2.74        |
| LZTS1       | leucine zipper, putative transcription | chr8p22              | transcription, DNA-dependent                 | ---                                   | -1.81         | 1.30            | -1.23     | 1.41        | 1.06      | -3.59       | -1.10      | -1.66        | -1.74      | -1.84        | 1.07       | 1.12         |
| LZTS1       | leucine zipper, putative transcription | chr8p22              | transcription, DNA-dependent                 | ---                                   | 1.99          | 1.74            | -1.36     | -1.28       | -1.12     | 1.19        | 2.13       | 2.75         | -1.64      | 1.14         | -1.59      | -1.28        |
| LZTS2       | leucine zipper, putative transcription | chr10q24             | cell cycle                                   | ---                                   | 1.14          | 1.15            | -1.10     | 1.04        | -1.13     | -1.15       | 1.05       | 1.07         | 1.27       | 1.14         | 1.15       | 1.27         |
| LZTS2       | leucine zipper, putative transcription | chr10q24             | cell cycle                                   | ---                                   | 1.36          | -1.18           | 1.08      | -1.13       | -1.25     | -1.14       | 1.30       | 1.07         | 1.32       | 1.41         | 1.93       | 1.90         |
| LZTS3       | leucine zipper, putative transcription | chr20p13             | protein homooligomerization                  | ---                                   | -1.15         | -1.13           | -1.51     | -1.17       | 3.13      | 2.89        | 1.26       | 1.21         | 1.76       | 1.72         | 1.81       | 2.19         |

| ID        | Gene Title                  | Chromosomal Location | 1st Gene Ontology Biological Process        | Pathway                              | A2497 30 mins | A2497P' 30 mins | A2497 2 h | A2497P' 2 h | A2497 4 h | A2497P' 4 h | A2497 24 h | A2497P' 24 h | A2497 48 h | A2497P' 48 h | A2497 72 h | A2497P' 72 h |
|-----------|-----------------------------|----------------------|---------------------------------------------|--------------------------------------|---------------|-----------------|-----------|-------------|-----------|-------------|------------|--------------|------------|--------------|------------|--------------|
| MACF1     | microtubule-actin crosslink | chr1p32-p31          | mesoderm formation                          | ---                                  | -1.01         | -1.60           | -1.54     | -2.02       | -2.65     | -2.05       | 1.41       | -1.31        | 1.97       | -1.01        | -3.19      | 2.03         |
| MACF1     | microtubule-actin crosslink | chr1p32-p31          | mesoderm formation                          | ---                                  | 1.06          | 1.14            | -1.06     | -1.16       | 1.16      | 1.03        | -1.13      | -1.07        | -1.14      | -1.36        | -1.29      | -1.30        |
| MACF1     | microtubule-actin crosslink | chr1p32-p31          | mesoderm formation                          | ---                                  | 1.02          | -1.17           | 1.00      | 1.08        | 1.12      | 1.23        | -1.58      | -1.55        | -1.59      | -1.42        | -1.35      | -1.40        |
| MACF1     | microtubule-actin crosslink | chr1p32-p31          | mesoderm formation                          | ---                                  | 1.08          | 1.08            | 1.00      | 1.04        | -1.02     | -1.05       | -1.27      | -1.16        | -1.51      | -1.27        | -1.42      | -1.56        |
| MACF1     | microtubule-actin crosslink | chr1p32-p31          | mesoderm formation                          | ---                                  | 1.03          | -1.04           | -1.11     | -1.01       | 1.03      | -1.01       | 1.00       | -1.00        | -1.44      | -1.56        | -1.46      | -1.32        |
| MACF1     | microtubule-actin crosslink | chr1p32-p31          | mesoderm formation                          | ---                                  | -1.01         | -1.02           | 1.01      | -1.07       | -1.23     | -1.09       | -1.26      | -1.21        | 1.01       | -1.10        | -1.27      | -1.14        |
| MACROD1   | MACRO domain containing     | chr11q11             | response to DNA damage stimulus             | ---                                  | 1.09          | 1.07            | 1.40      | 1.18        | 1.23      | 1.04        | -1.24      | 1.09         | -1.50      | -1.19        | -2.39      | -1.72        |
| MACROD2   | MACRO domain containing     | chr20p12.1           | response to DNA damage stimulus             | ---                                  | -1.12         | -1.25           | -1.24     | -1.35       | 1.06      | -1.09       | -1.42      | -1.14        | -1.28      | -1.06        | -2.18      | -1.65        |
| MACROD2   | MACROD2 antisense RNA       | chr20p12.1           | 0                                           | ---                                  | 2.44          | 2.05            | -1.77     | -1.72       | -1.24     | -1.74       | -6.62      | -2.48        | 1.76       | 1.62         | -1.00      | -1.59        |
| MAD1L1    | MAD1 mitotic arrest deficit | chr7p22              | cell cycle checkpoint                       | Cell_cycle_KEGG // GenMAPP           | 1.02          | 1.15            | 1.07      | 1.21        | -1.23     | -1.18       | 1.16       | 1.18         | 1.78       | 1.03         | 1.53       | 1.98         |
| MAD2L1BP  | MAD2L1 binding protein      | chr6p21.1            | mitotic cell cycle checkpoint               | ---                                  | -1.06         | -1.03           | -1.04     | -1.03       | 1.08      | 1.03        | 1.12       | 1.11         | -1.01      | 1.00         | 1.18       | 1.25         |
| MAD2L2    | MAD2 mitotic arrest deficit | chr1p36              | negative regulation of transcription from   | Cell_cycle_KEGG // GenMAPP           | -1.17         | -1.12           | -1.01     | 1.02        | 1.05      | -1.11       | 1.18       | 1.15         | 1.91       | 1.59         | 1.23       | 1.34         |
| MAEA      | macrophage erythroblast at  | chr4p16.3            | cytoskeleton organization                   | ---                                  | 1.01          | -1.02           | 1.00      | 1.04        | -1.13     | -1.09       | -1.15      | -1.01        | -1.18      | -1.28        | -1.28      | -1.20        |
| MAF       | v-maf musculoaponeurotic    | chr16q22-q23         | negative regulation of transcription from   | ---                                  | -3.45         | -1.23           | -1.91     | -2.66       | -1.59     | 1.47        | 1.26       | -1.34        | 10.59      | 3.54         | 1.35       | 1.07         |
| MAFB      | v-maf musculoaponeurotic    | chr20q11.2-q13.1     | transcription, DNA-dependent                | ---                                  | -1.08         | 1.05            | -1.11     | -1.04       | -1.18     | -1.18       | -1.28      | -1.39        | 1.10       | 1.40         | 1.69       | 1.28         |
| MAFF      | v-maf musculoaponeurotic    | chr22q13.1           | in utero embryonic development              | Smooth_muscle_contraction // GenMAPP | 1.26          | 1.27            | -1.04     | 1.02        | -1.11     | -1.18       | 1.60       | 2.40         | 3.17       | 2.24         | 2.69       | 2.39         |
| MAFF      | v-maf musculoaponeurotic    | chr22q13.1           | in utero embryonic development              | Smooth_muscle_contraction // GenMAPP | 1.25          | 1.12            | -1.08     | 1.01        | -1.09     | 1.01        | 2.15       | 1.54         | 3.26       | 2.48         | 2.88       | 2.60         |
| MAFG      | v-maf musculoaponeurotic    | chr17q25.3           | in utero embryonic development              | ---                                  | 1.02          | 1.02            | 1.01      | -1.05       | 1.03      | 1.04        | 1.08       | 1.08         | 1.39       | 1.37         | 1.01       | 1.10         |
| MAFK      | v-maf musculoaponeurotic    | chr7p22.3            | transcription, DNA-dependent                | ---                                  | -1.08         | -1.03           | -1.08     | -1.11       | -1.04     | -1.02       | 1.24       | 1.12         | 1.43       | 1.46         | 1.42       | 1.37         |
| MAGEA9    | melanoma antigen family     | chrXq28              | 0                                           | ---                                  | -1.33         | -1.99           | 1.32      | 1.50        | -1.50     | -1.29       | -1.85      | -1.06        | -1.05      | -1.53        | -1.64      | -1.91        |
| MAGEB18   | melanoma antigen family     | chrXp21.3            | 0                                           | ---                                  | 1.38          | 3.26            | 2.94      | -1.34       | -3.57     | -2.04       | 1.49       | 1.38         | 5.80       | 1.05         | -2.43      | 1.38         |
| MAGED2    | melanoma antigen family     | chrXp11.2            | 0                                           | ---                                  | -1.13         | -1.09           | -1.01     | 1.02        | 1.03      | -1.11       | 1.26       | 1.06         | 1.43       | 1.16         | 1.65       | 1.97         |
| MAGI1     | membrane associated guany   | chr3p14.1            | protein complex assembly                    | ---                                  | -1.12         | -1.23           | 1.02      | 1.02        | 1.02      | 1.04        | -1.06      | -1.02        | -1.48      | -1.36        | -1.37      | -1.16        |
| MAGI1     | membrane associated guany   | chr3p14.1            | protein complex assembly                    | ---                                  | 1.03          | 1.21            | 1.17      | 1.52        | 1.12      | -1.29       | 1.15       | -1.06        | -1.02      | -1.19        | 1.75       | 1.37         |
| MAGI1     | membrane associated guany   | chr3p14.1            | protein complex assembly                    | ---                                  | 1.09          | -1.18           | -1.06     | 1.17        | 2.21      | 1.68        | 1.06       | -1.05        | -2.69      | -1.24        | -2.51      | -2.67        |
| MAGI1     | membrane associated guany   | chr3p14.1            | protein complex assembly                    | ---                                  | 1.55          | 1.77            | 1.33      | 1.45        | -1.17     | -1.01       | -1.13      | -1.46        | -2.12      | -2.76        | -2.70      | -2.68        |
| MAGI1     | membrane associated guany   | chr3p14.1            | protein complex assembly                    | ---                                  | 1.87          | 1.36            | 1.17      | -1.11       | 1.20      | -1.01       | -1.15      | -1.40        | -2.82      | -2.93        | -2.04      | -1.50        |
| MAGI1     | membrane associated guany   | chr3p14.1            | protein complex assembly                    | ---                                  | 1.43          | -1.04           | 1.16      | 1.51        | -1.03     | -1.02       | 1.03       | -1.02        | -1.24      | -1.53        | -2.12      | -2.05        |
| MAGI1     | membrane associated guany   | chr3p14.1            | protein complex assembly                    | ---                                  | -1.01         | -1.12           | 1.03      | -1.12       | -1.11     | 1.09        | -1.07      | -1.09        | -1.68      | -1.40        | -1.49      | -1.39        |
| MAGI2     | membrane associated guany   | chr7q21              | positive regulation of receptor internaliza | ---                                  | -3.31         | -1.36           | 2.02      | 6.57        | -1.55     | 1.18        | -1.72      | 1.67         | -2.80      | -3.54        | -3.95      | -4.21        |
| MAGI2     | membrane associated guany   | chr7q21              | positive regulation of receptor internaliza | ---                                  | 1.51          | 1.46            | 1.02      | 1.21        | 1.58      | 1.26        | -1.85      | -1.68        | -2.96      | -1.95        | -4.76      | -12.05       |
| MAGI2-AS2 | MAGI2 antisense RNA 2       | ---                  | 0                                           | ---                                  | 1.81          | 1.48            | -6.27     | -2.61       | 2.92      | 3.20        | -1.90      | 1.05         | 10.64      | 2.82         | 1.78       | 2.59         |
| MAGI2-AS3 | MAGI2 antisense RNA 3       | ---                  | 0                                           | ---                                  | 1.32          | 1.33            | -1.60     | -1.53       | -1.02     | -1.50       | 1.06       | 1.59         | -1.99      | -1.14        | -3.19      | -3.55        |
| MAGI3     | membrane associated guany   | chr1p12-p11.2        | apoptotic process                           | ---                                  | -1.27         | -1.34           | -1.06     | -1.35       | -1.44     | -1.35       | -1.12      | 1.03         | 1.14       | 1.13         | 1.41       | 1.47         |
| MAGI3     | membrane associated guany   | chr1p12-p11.2        | apoptotic process                           | ---                                  | 1.10          | -1.01           | 1.06      | 1.24        | -1.03     | 1.11        | -1.16      | -1.07        | -1.85      | -1.57        | -2.25      | -1.77        |
| MAGT1     | magnesium transporter 1     | chrXq21.1            | protein N-linked glycosylation              | ---                                  | 1.14          | 1.08            | -1.09     | -1.06       | -1.12     | 1.05        | -1.12      | -1.13        | -1.26      | -1.06        | -1.24      | -1.35        |
| MAGT1     | magnesium transporter 1     | chrXq21.1            | protein N-linked glycosylation              | ---                                  | 1.02          | 1.02            | 1.06      | -1.14       | 1.08      | -1.04       | -1.05      | -1.05        | -1.27      | -1.03        | -1.14      | -1.30        |
| MAGT1     | magnesium transporter 1     | chrXq21.1            | protein N-linked glycosylation              | ---                                  | -1.01         | -1.03           | -1.01     | -1.17       | -1.01     | 1.02        | -1.10      | -1.18        | -1.40      | -1.04        | -1.45      | -1.37        |
| MAK16     | MAK16 homolog (S. cerev     | chr8p12              | 0                                           | ---                                  | -1.02         | 1.01            | -1.02     | -1.01       | 1.05      | 1.02        | -1.06      | -1.06        | 1.12       | -1.00        | 1.34       | 1.30         |
| MAL2      | mal, T-cell differentiation | chr8q23              | 0                                           | ---                                  | 1.00          | -1.01           | -1.01     | 1.06        | -1.05     | 1.01        | -1.07      | -1.14        | 1.02       | -1.23        | -1.22      | -1.22        |
| MALAT1    | metastasis associated lung  | chr11q13.1           | 0                                           | ---                                  | 1.10          | 1.03            | 1.06      | 1.15        | 1.13      | 1.05        | 1.19       | -1.02        | -1.92      | -1.97        | -1.58      | -1.51        |
| MALL      | mal, T-cell differentiation | chr2q13              | cholesterol homeostasis                     | ---                                  | -1.06         | 1.10            | -1.03     | -1.04       | -1.14     | 1.02        | 1.37       | 1.06         | 1.88       | 2.20         | 1.68       | 2.05         |
| MALSU1    | mitochondrial assembly of   | chr7p15.3            | ribosomal large subunit biogenesis          | ---                                  | -1.08         | -1.22           | -1.13     | 1.09        | 1.02      | 1.11        | -1.08      | 1.11         | 1.02       | 1.05         | 1.15       | 1.35         |
| MALSU1    | mitochondrial assembly of   | chr7p15.3            | ribosomal large subunit biogenesis          | ---                                  | 1.02          | -1.07           | -1.01     | 1.06        | -1.01     | 1.04        | 1.01       | 1.06         | 1.37       | 1.31         | 1.18       | 1.27         |
| MALSU1    | mitochondrial assembly of   | chr7p15.3            | ribosomal large subunit biogenesis          | ---                                  | -1.07         | 1.04            | 1.03      | 1.16        | 1.09      | -1.01       | 1.18       | 1.01         | 1.01       | -1.10        | -2.06      | -2.29        |
| MALT1     | mucosa associated lymphoi   | chr18q21             | B-1 B cell differentiation                  | ---                                  | -1.04         | -1.01           | 1.01      | -1.05       | 1.06      | -1.08       | 1.05       | -1.02        | -1.33      | -1.48        | -1.10      | -1.14        |
| MALT1     | mucosa associated lymphoi   | chr18q21             | B-1 B cell differentiation                  | ---                                  | 1.06          | -1.03           | 1.07      | 1.18        | -1.03     | 1.06        | -1.15      | -1.06        | -1.71      | -1.96        | -1.76      | -1.45        |
| MALT1     | mucosa associated lymphoi   | chr18q21             | B-1 B cell differentiation                  | ---                                  | -1.07         | -1.02           | -1.03     | -1.02       | -1.01     | -1.10       | 1.08       | 1.08         | -1.20      | -1.33        | -1.06      | -1.10        |
| MAMDC2    | MAM domain containing 2     | chr9q21.12           | peptide cross-linking via chondroitin 4-s   | ---                                  | 1.35          | 1.35            | 1.09      | -1.12       | -1.53     | -1.11       | -1.53      | -1.01        | -2.66      | -1.98        | -3.43      | -4.21        |
| MAML2     | mastermind-like 2 (Drosop   | chr11q21             | transcription, DNA-dependent                | ---                                  | -1.22         | 1.06            | -1.74     | -1.53       | 1.72      | 1.52        | 1.21       | -1.21        | 1.15       | 1.20         | 1.90       | 2.18         |
| MAML1     | mastermind-like domain co   | chrXq28              | transcription, DNA-dependent                | ---                                  | -1.09         | -1.07           | 1.04      | -1.01       | 1.05      | -1.03       | -1.06      | -1.04        | -1.28      | -1.17        | -1.53      | -1.49        |
| MAN1A1    | mannosidase, alpha, class 1 | chr6q22              | protein glycosylation                       | ---                                  | 1.32          | 1.55            | -1.02     | -1.39       | -1.32     | -1.22       | -1.15      | 1.03         | -2.08      | -1.50        | -1.95      | -2.11        |
| MAN1A2    | mannosidase, alpha, class 1 | chr1p13              | protein glycosylation                       | ---                                  | 1.08          | -1.02           | -1.14     | -1.13       | -1.10     | -1.13       | -1.04      | -1.09        | -1.58      | -1.41        | -1.38      | -1.27        |
| MAN1A2    | mannosidase, alpha, class 1 | chr1p13              | protein glycosylation                       | ---                                  | 1.05          | 1.27            | -1.02     | 1.03        | 1.04      | 1.18        | -1.47      | -1.50        | -2.86      | -2.05        | -1.89      | -2.13        |
| MAN1A2    | mannosidase, alpha, class 1 | chr1p13              | protein glycosylation                       | ---                                  | -1.28         | -1.20           | 1.09      | 1.01        | 1.36      | 1.25        | -1.50      | -1.50        | -2.36      | -1.54        | -1.98      | -1.78        |
| MAN1A2    | mannosidase, alpha, class 1 | chr1p13              | N-glycan processing                         | ---                                  | -1.06         | 1.00            | -1.01     | -1.20       | -1.00     | -1.09       | -1.12      | -1.53        | -2.31      | -2.68        | -1.58      | -1.78        |
| MAN1A2    | mannosidase, alpha, class 1 | chr1p13              | protein glycosylation                       | ---                                  | 1.09          | 1.11            | 1.03      | -1.00       | 1.02      | 1.03        | -1.23      | -1.12        | -1.57      | -1.42        | -1.47      | -1.49        |
| MAN1B1    | mannosidase, alpha, class 1 | chr9q34              | protein folding                             | ---                                  | -1.03         | -1.17           | 1.03      | 1.20        | 1.08      | -1.04       | 1.26       | 1.16         | 1.14       | 1.05         | 1.09       | 1.30         |
| MAN1B1-AS | MAN1B1 antisense RNA 1      | chr9q34.3            | 0                                           | ---                                  | 1.18          | 1.05            | 1.00      | 1.11        | -1.15     | -1.24       | 1.45       | 1.23         | -1.26      | -1.22        | -2.12      | -1.25        |
| MAN2A1    | mannosidase, alpha, class 2 | chr5q21-q22          | in utero embryonic development              | ---                                  | 1.13          | 1.13            | -1.03     | -1.09       | -1.18     | -1.00       | -1.05      | 1.01         | -1.03      | 1.19         | 1.15       | 1.05         |
| MAN2A1    | mannosidase, alpha, class 2 | chr5q21-q22          | in utero embryonic development              | ---                                  | 1.07          | 1.10            | 1.13      | 1.09        | -1.00     | 1.04        | -1.13      | 1.15         | -1.18      | -1.04        | 1.21       | -1.02        |
| MAN2A1    | mannosidase, alpha, class 2 | chr5q21-q22          | in utero embryonic development              | ---                                  | -1.02         | -1.03           | -1.00     | -1.07       | 1.08      | 1.20        | -1.05      | -1.07        | 1.01       | 1.15         | 1.34       | 1.37         |
| MAN2A2    | mannosidase, alpha, class 2 | chr15q26.1           | carbohydrate metabolic process              | ---                                  | 1.03          | -1.02           | 1.08      | 1.33        | 1.08      | 1.08        | 1.21       | 1.16         | 1.40       | 1.26         | 1.14       | 1.45         |
| MAN2C1    | mannosidase, alpha, class 2 | chr15q11-q13         | carbohydrate metabolic process              | ---                                  | -1.23         | -1.23           | 1.09      | 1.24        | 1.01      | -1.10       | 1.26       | 1.03         | 1.66       | 1.42         | 1.21       | 1.27         |
| MAN2C1    | mannosidase, alpha, class 2 | chr15q11-q13         | carbohydrate metabolic process              | ---                                  | -1.21         | 1.07            | 1.07      | -1.02       | 1.13      | -1.21       | -1.24      | 1.06         | -1.14      | -1.07        | -1.89      | -1.61        |
| MANBA     | mannosidase, beta A, lysos  | chr4q22-q25          | carbohydrate metabolic process              | ---                                  | -1.06         | -1.11           | 1.22      | 1.47        | 1.29      | 1.22        | 1.27       | 1.18         | 1.39       | 1.40         | 1.26       | 1.58         |

| ID        | Gene Title                                                | Chromosomal Location | 1st Gene Ontology Biological Process                                 | Pathway                                          | A2497 30 mins | A2497P' 30 mins | A2497 2 h | A2497P' 2 h | A2497 4 h | A2497P' 4 h | A2497 24 h | A2497P' 24 h | A2497 48 h | A2497P' 48 h | A2497 72 h | A2497P' 72 h |
|-----------|-----------------------------------------------------------|----------------------|----------------------------------------------------------------------|--------------------------------------------------|---------------|-----------------|-----------|-------------|-----------|-------------|------------|--------------|------------|--------------|------------|--------------|
| MANBAL    | mannosidase, beta A, lysosomal                            | chr20q11.23-q12      | 0                                                                    | ---                                              | 1.00          | -1.06           | 1.04      | 1.11        | -1.02     | -1.18       | 1.10       | 1.19         | 1.54       | 1.23         | 1.42       | 1.59         |
| MANEA     | mannosidase, endo-alpha                                   | chr6p16.1            | protein N-linked glycosylation via asparagin                         | ---                                              | 1.11          | 1.25            | -1.25     | -1.01       | 1.19      | 1.23        | -1.10      | -1.19        | -1.29      | 1.13         | -2.03      | -1.70        |
| MANEAL    | mannosidase, endo-alpha-like                              | chr1p34.3            | 0                                                                    | ---                                              | -1.12         | -1.03           | -1.11     | -1.07       | 1.03      | 1.01        | -1.19      | -1.10        | -1.29      | -1.24        | -1.41      | -1.24        |
| MANF      | mesencephalic astrocyte-derived secretory protein         | chr3p21.1            | vasoconstriction of artery involved in ischemia                      | ---                                              | -1.09         | -1.06           | -1.01     | -1.03       | 1.06      | -1.06       | 1.00       | -1.07        | 1.34       | 1.16         | 1.30       | 1.39         |
| MANSC1    | MANSC domain containing protein                           | chr12p13.2           | 0                                                                    | ---                                              | 1.06          | 1.06            | -1.12     | 1.06        | 1.01      | 1.15        | -1.25      | -1.22        | -1.31      | -1.14        | -1.40      | -1.42        |
| MAOA      | monoamine oxidase A                                       | chrXp11.3            | cellular biogenic amine metabolic process                            | Biogenic_Amine_Synthesis // GenMAPP              | -1.27         | -1.24           | 2.51      | -3.46       | 2.68      | -1.12       | 2.68       | 1.36         | 1.47       | -1.69        | 9.29       | 6.47         |
| MAOB      | monoamine oxidase B                                       | chrXp11.23           | xenobiotic metabolic process                                         | ---                                              | 1.14          | 1.10            | -1.07     | -1.13       | 1.15      | 1.13        | 1.13       | 1.07         | -1.59      | -1.20        | -3.22      | -3.31        |
| MAP1A     | microtubule-associated protein 1A                         | chr15q15.3           | microtubule cytoskeleton organization                                | ---                                              | -1.05         | -1.21           | -1.10     | -1.03       | 1.01      | 1.14        | 1.01       | 1.03         | -2.00      | -2.42        | -2.08      | -2.20        |
| MAP1B     | microtubule-associated protein 1B                         | chr5q13              | microtubule cytoskeleton organization                                | ---                                              | -1.02         | 1.00            | 1.08      | 1.08        | 1.19      | 1.14        | -1.04      | -1.14        | 1.04       | 1.22         | 1.46       | 1.64         |
| MAP1B     | microtubule-associated protein 1B                         | chr5q13              | microtubule cytoskeleton organization                                | ---                                              | -1.13         | 1.11            | 1.08      | -1.24       | -1.09     | 1.07        | -1.56      | -1.02        | -1.38      | 1.17         | 1.55       | 1.52         |
| MAP1B     | microtubule-associated protein 1B                         | chr5q13              | microtubule cytoskeleton organization                                | ---                                              | -1.36         | -1.42           | 1.13      | -1.12       | 1.14      | 1.11        | -2.22      | -1.14        | -1.13      | 1.01         | 1.52       | 1.39         |
| MAP1LC3B  | microtubule-associated protein 1LC3B                      | chr16q24.2           | autophagic vacuole assembly                                          | ---                                              | -1.02         | -1.04           | 1.05      | 1.01        | 1.02      | 1.01        | 1.11       | 1.05         | 1.90       | 1.79         | 1.82       | 1.87         |
| MAP1S     | microtubule-associated protein 1S                         | chr19p13.11          | microtubule cytoskeleton organization                                | ---                                              | -1.13         | -1.10           | -1.10     | 1.13        | -1.09     | -1.36       | 1.14       | 1.49         | 1.88       | 1.48         | 1.44       | 1.76         |
| MAP2      | microtubule-associated protein 2                          | chr2q34-q35          | microtubule bundle formation                                         | MAPK_Cascade // GenMAPP                          | -1.26         | -1.32           | 1.02      | 1.17        | 1.00      | -1.03       | 1.06       | 1.30         | -2.25      | -1.62        | -2.11      | -2.07        |
| MAP2K1    | mitogen-activated protein kinase 1                        | chr15q22.1-q22.33    | MAPK cascade                                                         | Integrin-mediated_cell_adhesion_KEGG // C        | 1.22          | 1.21            | 1.20      | 1.03        | 1.08      | 1.16        | 1.08       | -1.00        | 1.32       | 1.23         | 1.37       | 1.20         |
| MAP2K2    | mitogen-activated protein kinase 2                        | chr19p13.3           | MAPK cascade                                                         | Integrin-mediated_cell_adhesion_KEGG // C        | -1.08         | -1.05           | 1.25      | 1.55        | -1.05     | 1.01        | -1.04      | 1.21         | 1.10       | 1.19         | -1.15      | 1.33         |
| MAP2K2    | mitogen-activated protein kinase 2                        | chr19p13.3           | MAPK cascade                                                         | Integrin-mediated_cell_adhesion_KEGG // C        | -1.19         | -1.24           | 1.18      | 1.15        | 1.20      | 1.01        | 1.24       | 1.13         | 1.45       | 1.03         | 1.18       | 1.30         |
| MAP2K4    | mitogen-activated protein kinase 4                        | chr17p12             | MAPK cascade                                                         | Apoptosis // GenMAPP // Apoptosis_GenM           | 1.04          | -1.01           | 1.02      | 1.12        | 1.01      | -1.04       | -1.16      | -1.11        | -1.39      | -1.21        | -1.10      | -1.03        |
| MAP2K4    | mitogen-activated protein kinase 4                        | chr17p12             | MAPK cascade                                                         | Apoptosis // GenMAPP // Apoptosis_GenM           | 1.01          | -1.11           | 1.06      | 1.13        | -1.04     | -1.07       | 1.11       | 1.16         | 1.75       | 1.63         | 2.11       | 2.20         |
| MAP2K5    | mitogen-activated protein kinase 5                        | chr15q23             | negative regulation of transcription from RNA polymerase II promoter | Integrin-mediated_cell_adhesion_KEGG // C        | -1.18         | -1.25           | 1.02      | -1.10       | -1.06     | -1.10       | 1.03       | 1.06         | -1.18      | -1.12        | 1.00       | 1.15         |
| MAP2K5    | mitogen-activated protein kinase 5                        | chr15q23             | negative regulation of transcription from RNA polymerase II promoter | Integrin-mediated_cell_adhesion_KEGG // C        | 1.80          | 2.58            | 1.13      | -1.31       | 1.07      | -1.26       | -2.06      | -3.18        | 1.57       | 1.99         | 2.32       | 2.41         |
| MAP2K5    | mitogen-activated protein kinase 5                        | chr15q23             | negative regulation of transcription from RNA polymerase II promoter | Integrin-mediated_cell_adhesion_KEGG // C        | 1.62          | 1.28            | -2.40     | -2.14       | -1.39     | 1.57        | 1.72       | 1.63         | -5.89      | -2.22        | -1.69      | -1.66        |
| MAP2K6    | mitogen-activated protein kinase 6                        | chr17q24.3           | MAPK cascade                                                         | Integrin-mediated_cell_adhesion_KEGG // C        | -1.03         | -1.05           | -1.15     | -1.20       | 1.09      | 1.06        | 1.00       | 1.04         | -1.25      | -1.27        | -1.06      | -1.02        |
| MAP2K7    | mitogen-activated protein kinase 7                        | chr19p13.3-p13.2     | toll-like receptor signaling pathway                                 | MAPK_Cascade // GenMAPP                          | -1.04         | 1.02            | 1.35      | -1.10       | -1.03     | 1.07        | 1.05       | -1.08        | 1.11       | 1.13         | 1.15       | 1.01         |
| MAP3K12   | mitogen-activated protein kinase 12                       | chr12q13             | activation of MAPKK activity                                         | MAPK_Cascade // GenMAPP                          | -1.12         | -1.15           | 1.05      | -1.00       | 1.08      | -1.02       | -1.15      | -1.02        | -1.32      | -1.24        | -1.48      | -1.40        |
| MAP3K2    | mitogen-activated protein kinase 3                        | chr2q14.3            | activation of MAPKK activity                                         | MAPK_Cascade // GenMAPP                          | 1.10          | 1.12            | 1.03      | -1.08       | -1.10     | 1.06        | -1.00      | 1.11         | 1.16       | 1.35         | 1.44       | 1.17         |
| MAP3K2    | mitogen-activated protein kinase 3                        | chr2q14.3            | activation of MAPKK activity                                         | MAPK_Cascade // GenMAPP                          | -1.18         | -1.22           | -1.02     | -1.08       | 1.18      | 1.06        | 1.02       | -1.10        | -1.04      | 1.18         | 1.12       | 1.33         |
| MAP3K3    | mitogen-activated protein kinase 3                        | chr17q23.3           | MAPK cascade                                                         | MAPK_Cascade // GenMAPP                          | -1.18         | -1.13           | 1.00      | -1.15       | 1.05      | 1.09        | 1.03       | 1.04         | -1.39      | -1.40        | -1.88      | -1.50        |
| MAP3K3    | mitogen-activated protein kinase 3                        | chr17q23.3           | MAPK cascade                                                         | MAPK_Cascade // GenMAPP                          | -1.02         | -1.04           | 1.08      | -1.02       | 1.08      | 1.01        | 1.13       | 1.28         | -1.20      | -1.33        | -1.62      | -1.31        |
| MAP3K3    | mitogen-activated protein kinase 3                        | chr17q23.3           | MAPK cascade                                                         | MAPK_Cascade // GenMAPP                          | -1.03         | 1.05            | 1.02      | -1.36       | 1.58      | 1.83        | -2.60      | -3.20        | 1.40       | 2.46         | -1.37      | -1.35        |
| MAP3K4    | mitogen-activated protein kinase 4                        | chr6p26              | activation of MAPKK activity                                         | G13_Signaling_Pathway // GenMAPP                 | 1.26          | 1.17            | 1.22      | 1.05        | 1.10      | 1.13        | 1.05       | -1.14        | -1.30      | -1.54        | -1.51      | -1.23        |
| MAP3K7    | mitogen-activated protein kinase 7                        | chr6p15              | MAPK cascade                                                         | ---                                              | 1.10          | -1.09           | -1.01     | -1.11       | -1.35     | -1.12       | -1.39      | -1.08        | -1.23      | -1.07        | -1.38      | -1.38        |
| MAP3K8    | mitogen-activated protein kinase 8                        | chr10p11.23          | MAPK cascade                                                         | ---                                              | 1.05          | 1.47            | 1.17      | 1.01        | 1.18      | -1.15       | -1.04      | -1.04        | 1.34       | 1.09         | 1.63       | -1.05        |
| MAP4      | microtubule-associated protein 4                          | chr3p21              | mitotic spindle organization                                         | ---                                              | -1.06         | -1.06           | 1.03      | 1.02        | 1.03      | 1.01        | 1.10       | 1.02         | 1.33       | 1.25         | 1.20       | 1.32         |
| MAP4      | microtubule-associated protein 4                          | chr3p21              | mitotic spindle organization                                         | ---                                              | -1.02         | -1.03           | -1.02     | 1.00        | 1.02      | -1.01       | 1.11       | 1.09         | 1.29       | 1.26         | 1.19       | 1.30         |
| MAP4      | microtubule-associated protein 4                          | chr3p21              | mitotic spindle organization                                         | ---                                              | 1.01          | -1.01           | -1.00     | 1.02        | 1.00      | 1.01        | 1.08       | 1.03         | 1.30       | 1.16         | 1.14       | 1.22         |
| MAP4      | microtubule-associated protein 4                          | chr3p21              | mitotic spindle organization                                         | ---                                              | -1.04         | -1.03           | -1.05     | -1.05       | 1.01      | 1.05        | -1.01      | -1.06        | -1.11      | 1.01         | -1.13      | -1.02        |
| MAP4      | microtubule-associated protein 4                          | chr3p21              | mitotic spindle organization                                         | ---                                              | -7.29         | 1.06            | 1.26      | 1.01        | 1.23      | -4.20       | -1.20      | -1.03        | 2.73       | 2.79         | 2.87       | 1.70         |
| MAP4K2    | mitogen-activated protein kinase 4                        | chr11q13             | protein phosphorylation                                              | ---                                              | 1.20          | 1.19            | -1.13     | -1.01       | -1.05     | -1.09       | 1.16       | 1.25         | -1.03      | 1.02         | -1.43      | -1.30        |
| MAP4K3    | mitogen-activated protein kinase 4                        | chr2p22.1            | protein phosphorylation                                              | ---                                              | 1.41          | 1.51            | 1.24      | -1.01       | 1.08      | 1.01        | -1.23      | -1.09        | -1.89      | -1.90        | -1.60      | -2.52        |
| MAP4K4    | mitogen-activated protein kinase 4                        | chr2q11.2-q12        | protein phosphorylation                                              | ---                                              | 1.13          | 1.17            | -1.10     | -1.34       | -1.13     | 1.13        | -1.00      | 1.07         | -1.49      | -1.16        | -1.75      | -2.47        |
| MAP4K4    | mitogen-activated protein kinase 4                        | chr2q11.2-q12        | protein phosphorylation                                              | ---                                              | 1.18          | 1.19            | 1.07      | -1.06       | -1.19     | 1.10        | 1.05       | -1.01        | -1.05      | -1.34        | -1.50      | -2.00        |
| MAP4K5    | mitogen-activated protein kinase 4                        | chr14q11.2-q21       | protein phosphorylation                                              | ---                                              | 1.28          | 1.08            | -1.10     | -1.10       | -1.36     | 1.09        | -1.29      | -1.25        | -1.72      | -1.15        | -1.83      | -1.80        |
| MAP6D1    | MAP6 domain containing protein 1                          | chr3q27.1            | negative regulation of microtubule depolymerization                  | ---                                              | 1.05          | 1.02            | 1.27      | 1.08        | 1.18      | 1.29        | -1.03      | 1.22         | 1.94       | 2.21         | 1.13       | 1.16         |
| MAP7      | microtubule-associated protein 7                          | chr6q23.3            | microtubule cytoskeleton organization                                | ---                                              | -1.04         | 1.03            | -1.06     | -1.06       | -1.14     | -1.11       | -1.03      | -1.00        | 1.04       | 1.08         | -1.21      | -1.16        |
| MAP7      | microtubule-associated protein 7                          | chr6q23.3            | microtubule cytoskeleton organization                                | ---                                              | -1.04         | 1.05            | -1.05     | -1.18       | -1.21     | -1.06       | 1.39       | 1.21         | 1.08       | 1.24         | 1.30       | 1.11         |
| MAP7      | microtubule-associated protein 7                          | chr6q23.3            | microtubule cytoskeleton organization                                | ---                                              | -1.14         | -1.02           | -1.07     | -1.14       | 1.43      | 1.21        | 1.24       | -1.04        | 1.37       | 1.54         | 1.45       | 1.56         |
| MAP7D2    | MAP7 domain containing protein 2                          | chrXp22.12           | 0                                                                    | ---                                              | -1.08         | 1.01            | -1.02     | -1.11       | 1.05      | -1.02       | -1.10      | -1.06        | -1.40      | -1.24        | -1.90      | -1.86        |
| MAP7D3    | MAP7 domain containing protein 3                          | chrXq26.3            | 0                                                                    | ---                                              | 1.19          | 1.23            | 1.12      | 1.04        | 1.05      | 1.02        | -1.28      | -1.07        | -1.95      | -1.82        | -1.64      | -2.31        |
| MAPK1     | mitogen-activated protein kinase 1                        | chr22q11.21          | MAPK cascade                                                         | MAPK_Cascade // GenMAPP // SIP_Signaling_Pathway | -1.02         | 1.05            | 1.04      | 1.04        | 1.04      | -1.21       | 1.18       | -1.07        | 1.04       | -1.02        | 1.78       | 1.36         |
| MAPK1     | mitogen-activated protein kinase 1                        | chr22q11.21          | MAPK cascade                                                         | MAPK_Cascade // GenMAPP // SIP_Signaling_Pathway | -1.14         | 1.00            | 1.30      | 1.30        | 1.10      | 1.10        | -1.03      | 1.02         | -1.01      | -1.02        | -1.22      | -1.26        |
| MAPK1     | mitogen-activated protein kinase 1                        | chr22q11.21          | MAPK cascade                                                         | MAPK_Cascade // GenMAPP // SIP_Signaling_Pathway | 1.25          | 1.29            | 1.02      | -1.07       | -1.09     | -1.11       | -1.11      | -1.19        | -1.39      | -1.28        | -1.31      | -1.57        |
| MAPK1     | mitogen-activated protein kinase 1                        | chr22q11.21          | MAPK cascade                                                         | MAPK_Cascade // GenMAPP // SIP_Signaling_Pathway | 1.15          | -1.09           | 1.22      | 1.00        | -1.23     | -1.03       | 1.07       | 1.03         | 1.69       | 1.56         | 1.48       | 1.44         |
| MAPK12    | mitogen-activated protein kinase 12                       | chr22q13.33          | MAPK cascade                                                         | Integrin-mediated_cell_adhesion_KEGG // C        | -1.04         | 1.08            | -1.03     | 1.31        | 1.10      | 1.19        | 1.20       | 1.01         | -1.48      | -1.83        | 1.03       | 1.17         |
| MAPK12    | mitogen-activated protein kinase 12                       | chr22q13.33          | MAPK cascade                                                         | Integrin-mediated_cell_adhesion_KEGG // C        | 1.39          | 1.09            | 1.07      | 1.59        | 1.11      | 1.35        | -1.37      | -1.00        | -1.48      | -1.24        | -2.30      | -1.70        |
| MAPK13    | mitogen-activated protein kinase 13                       | chr6p21.31           | MAPK cascade                                                         | ---                                              | 1.50          | 1.48            | -1.18     | -1.33       | 1.66      | 1.64        | 1.31       | 1.04         | 1.32       | 1.38         | 1.35       | 1.80         |
| MAPK14    | mitogen-activated protein kinase 14                       | chr6p21.3-p21.2      | DNA damage checkpoint                                                | MAPK_Cascade // GenMAPP                          | -1.69         | -1.47           | 1.01      | 1.22        | 1.46      | 1.18        | 1.31       | 1.27         | 1.80       | 1.52         | 2.12       | 2.44         |
| MAPK14    | mitogen-activated protein kinase 14                       | chr6p21.3-p21.2      | DNA damage checkpoint                                                | MAPK_Cascade // GenMAPP                          | -1.25         | -1.12           | -1.07     | 1.23        | 1.02      | -1.03       | 1.37       | 1.02         | 1.67       | 1.49         | 1.76       | 1.87         |
| MAPK14    | mitogen-activated protein kinase 14                       | chr6p21.3-p21.2      | DNA damage checkpoint                                                | MAPK_Cascade // GenMAPP                          | -1.12         | -1.12           | -1.01     | 1.27        | 1.36      | 1.03        | 1.44       | 1.34         | 2.36       | 2.35         | 1.88       | 1.67         |
| MAPK15    | mitogen-activated protein kinase 15                       | ---                  | negative regulation of transcription from RNA polymerase II promoter | ---                                              | -1.29         | -1.01           | -1.65     | -1.06       | 2.17      | 1.43        | 1.65       | 1.24         | 1.09       | -1.05        | -2.38      | -1.55        |
| MAPK1IP1L | mitogen-activated protein kinase 1 interacting protein 1L | chr14q22.3           | 0                                                                    | ---                                              | -1.00         | 1.04            | 1.01      | -1.01       | 1.03      | 1.02        | -1.18      | -1.13        | -1.34      | -1.28        | -1.22      | -1.32        |
| MAPK1IP1L | mitogen-activated protein kinase 1 interacting protein 1L | chr14q22.3           | 0                                                                    | ---                                              | 1.08          | 1.02            | -1.02     | -1.08       | -1.02     | 1.10        | -1.24      | -1.14        | -1.57      | -1.48        | -1.24      | -1.44        |
| MAPK1IP1L | mitogen-activated protein kinase 1 interacting protein 1L | chr14q22.3           | 0                                                                    | ---                                              | 1.23          | -1.05           | -1.01     | -1.08       | 1.16      | 1.12        | 1.09       | 1.06         | 1.48       | 1.39         | 1.66       | 2.04         |
| MAPK1IP1L | mitogen-activated protein kinase 1 interacting protein 1L | chr14q22.3           | 0                                                                    | ---                                              | -1.02         | 1.06            | -1.11     | -1.05       | -1.02     | 1.04        | -1.26      | -1.11        | -1.45      | -1.16        | -1.30      | -1.32        |
| MAPK3     | mitogen-activated protein kinase 3                        | chr16p11.2           | MAPK cascade                                                         | MAPK_Cascade // GenMAPP // SIP_Signaling_Pathway | -1.16         | -1.24           | 1.17      | -1.06       | 1.11      | -1.04       | 1.09       | -1.17        | 1.10       | -1.03        | 1.28       | 1.33         |
| MAPK6     | mitogen-activated protein kinase 6                        | chr15q21             | MAPK cascade                                                         | Integrin-mediated_cell_adhesion_KEGG // C        | 1.17          | 1.18            | -1.05     | -1.07       | -1.06     | 1.05        | -1.07      | -1.01        | 1.21       | 1.22         | 1.50       | 1.32         |



| ID          | Gene Title                    | Chromosomal Location | 1st Gene Ontology Biological Process      | Pathway                               | A2497 30 mins | A2497P' 30 mins | A2497 2 h | A2497P' 2 h | A2497 4 h | A2497P' 4 h | A2497 24 h | A2497P' 24 h | A2497 48 h | A2497P' 48 h | A2497 72 h | A2497P' 72 h |
|-------------|-------------------------------|----------------------|-------------------------------------------|---------------------------------------|---------------|-----------------|-----------|-------------|-----------|-------------|------------|--------------|------------|--------------|------------|--------------|
| MATR3 /// S | matrin 3 /// small nucleolar  | chr5q31.2            | 0                                         | ---                                   | -1.04         | 1.04            | 1.04      | -1.09       | 1.05      | -1.04       | -1.12      | -1.09        | -1.61      | -1.50        | -1.08      | -1.31        |
| MATR3 /// S | matrin 3 /// small nucleolar  | chr5q31.2            | 0                                         | ---                                   | -1.07         | -1.02           | -1.08     | 1.01        | 1.02      | 1.03        | 1.03       | -1.03        | -1.13      | -1.08        | -1.06      | -1.14        |
| MATR3 /// S | matrin 3 /// small nucleolar  | chr5q31.2            | 0                                         | ---                                   | -1.08         | -1.03           | -1.11     | -1.07       | -1.07     | 1.02        | -1.15      | -1.08        | -1.44      | -1.11        | -1.08      | 1.09         |
| MATR3 /// S | matrin 3 /// small nucleolar  | chr5q31.2            | 0                                         | ---                                   | 1.09          | 1.08            | 1.04      | 1.08        | -1.04     | 1.03        | -1.08      | -1.10        | -1.37      | -1.23        | -1.08      | -1.18        |
| MATR3 /// S | matrin 3 /// small nucleolar  | chr5q31.2            | 0                                         | ---                                   | 1.05          | 1.03            | 1.09      | 1.14        | 1.28      | 1.12        | -1.14      | -1.07        | 1.63       | 1.41         | 1.39       | 1.28         |
| MAU2        | MAU2 chromatid cohesion       | chr19p13.11          | mitotic cell cycle                        | ---                                   | 1.16          | 1.21            | 1.08      | 1.26        | 1.01      | -1.13       | 1.04       | -1.06        | -1.76      | -1.71        | -1.29      | -1.25        |
| MAVS        | mitochondrial antiviral sign  | chr20p13             | positive regulation of protein phosphoryl | ---                                   | 1.09          | -1.05           | 1.09      | 1.24        | -1.02     | 1.12        | -1.00      | 1.10         | -1.59      | -1.45        | -1.53      | -1.16        |
| MAVS        | mitochondrial antiviral sign  | chr20p13             | positive regulation of protein phosphoryl | ---                                   | -1.65         | -2.08           | 1.23      | -1.12       | 1.34      | 1.01        | 1.11       | 1.03         | -2.41      | -1.63        | -2.33      | -1.50        |
| MAVS        | mitochondrial antiviral sign  | chr20p13             | positive regulation of protein phosphoryl | ---                                   | 1.07          | 1.06            | 1.01      | 1.27        | 1.18      | 1.07        | 1.30       | 1.25         | -1.39      | -1.36        | -1.61      | -1.40        |
| MAX         | MYC associated factor X       | chr14q23             | transcription, DNA-dependent              | ---                                   | 1.15          | 1.16            | -1.05     | -1.06       | 1.01      | 1.09        | -1.22      | -1.12        | -1.92      | -2.02        | -1.61      | -2.15        |
| MAX         | MYC associated factor X       | chr14q23             | transcription, DNA-dependent              | ---                                   | 1.16          | 1.18            | -1.03     | -1.19       | -1.01     | -1.03       | -1.15      | -1.24        | -2.10      | -2.56        | -1.60      | -2.29        |
| MAX         | MYC associated factor X       | chr14q23             | transcription, DNA-dependent              | ---                                   | -1.06         | -1.01           | -1.09     | -1.04       | -1.16     | -1.09       | -1.07      | 1.05         | -1.67      | -1.37        | -1.90      | -1.87        |
| MB          | myoglobin                     | chr22q13.1           | response to hypoxia                       | ---                                   | -1.12         | -1.14           | 1.05      | 1.05        | -1.01     | 1.03        | 1.03       | 1.15         | 1.69       | 2.45         | 2.89       | 5.13         |
| MB21D1      | Mab-21 domain containing      | chr6q13              | activation of innate immune response      | ---                                   | 1.02          | 1.17            | 1.05      | -1.16       | 1.19      | 1.13        | -1.24      | 1.00         | 1.21       | 1.08         | 1.69       | 1.48         |
| MB21D2      | Mab-21 domain containing      | chr3q29              | 0                                         | ---                                   | -1.15         | -1.15           | 1.04      | 1.14        | 1.10      | -1.13       | 1.40       | 1.09         | 3.48       | 2.85         | 2.90       | 2.52         |
| MBD1        | methyl-CpG binding domain     | chr18q21             | transcription, DNA-dependent              | ---                                   | 1.53          | 1.31            | 1.13      | 1.09        | 1.36      | 1.10        | -1.41      | 1.50         | 1.23       | 1.25         | 2.25       | 2.89         |
| MBD1        | methyl-CpG binding domain     | chr18q21             | transcription, DNA-dependent              | ---                                   | 1.22          | 1.13            | 1.07      | 1.05        | -1.11     | 1.10        | 1.05       | 1.07         | 1.59       | 1.46         | 1.37       | 1.50         |
| MBD1        | methyl-CpG binding domain     | chr18q21             | transcription, DNA-dependent              | ---                                   | -1.05         | -1.05           | 1.19      | 1.10        | 1.02      | -1.23       | 1.29       | 1.30         | 1.58       | 1.38         | 1.44       | 1.76         |
| MBD2        | methyl-CpG binding domain     | chr18q21             | negative regulation of transcription from | ---                                   | 2.48          | 2.11            | -1.12     | -1.07       | 1.48      | 1.17        | 1.86       | 1.92         | 4.21       | 3.11         | 4.92       | 4.52         |
| MBD2        | methyl-CpG binding domain     | chr18q21             | negative regulation of transcription from | ---                                   | -1.12         | -1.07           | -1.01     | 1.06        | 1.02      | 1.04        | -1.01      | 1.07         | -1.02      | -1.03        | -1.15      | -1.18        |
| MBD5        | methyl-CpG binding domain     | chr2q23.1            | 0                                         | ---                                   | 1.20          | 1.17            | 1.16      | 1.06        | -1.32     | -1.17       | 1.45       | 1.06         | 1.31       | 1.52         | 2.04       | 1.51         |
| MBD5        | methyl-CpG binding domain     | chr2q23.1            | 0                                         | ---                                   | -1.14         | -1.17           | 1.21      | 1.16        | -1.14     | 1.19        | 1.04       | 1.07         | -2.00      | -1.67        | -1.35      | -1.47        |
| MBLAC1      | metallo-beta-lactamase dom    | chr7q22.1            | 0                                         | ---                                   | -1.34         | -1.23           | -1.36     | -1.30       | -1.12     | -1.17       | -1.58      | -1.45        | -1.40      | -1.48        | -2.79      | -2.49        |
| MBLAC2      | metallo-beta-lactamase dom    | chr5q14.3            | 0                                         | ---                                   | 1.73          | 2.15            | 1.55      | 1.48        | -1.19     | -1.05       | -1.60      | -1.02        | -2.13      | -2.93        | -3.31      | -2.30        |
| MBLAC2      | metallo-beta-lactamase dom    | chr5q14.3            | 0                                         | ---                                   | 1.04          | 1.00            | 1.20      | 1.02        | 1.04      | 1.18        | -1.28      | -1.03        | -3.12      | -2.29        | -2.56      | -2.51        |
| MBNL1-AS1   | MBNL1 antisense RNA 1         | chr3q25.1            | 0                                         | ---                                   | 1.08          | 1.05            | 1.07      | 1.36        | 1.07      | 1.11        | 1.36       | 1.22         | -1.12      | -1.77        | -1.15      | -1.12        |
| MBNL1-AS1   | MBNL1 antisense RNA 1         | chr3q25.1            | 0                                         | ---                                   | -1.04         | -1.20           | 1.04      | 1.11        | -1.13     | -1.09       | -1.07      | -1.11        | -1.88      | -1.66        | -1.86      | -1.48        |
| MBNL2       | muscleblind-like splicing reg | chr13q32.1           | regulation of alternative mRNA splicing   | ---                                   | -1.05         | -1.04           | 1.13      | -1.37       | 1.07      | -1.02       | -1.08      | -1.33        | 1.28       | 1.12         | 2.02       | 1.52         |
| MBNL2       | muscleblind-like splicing reg | chr13q32.1           | regulation of alternative mRNA splicing   | ---                                   | -1.25         | -1.14           | 1.08      | -1.26       | -1.04     | -1.11       | 1.16       | -1.10        | 1.39       | 1.56         | 1.69       | 1.52         |
| MBNL2       | muscleblind-like splicing reg | chr13q32.1           | regulation of alternative mRNA splicing   | ---                                   | -1.00         | -1.00           | 1.25      | -1.28       | 1.07      | 1.13        | 1.15       | 1.12         | 1.23       | 1.27         | 1.38       | 1.27         |
| MBNL2       | muscleblind-like splicing reg | chr13q32.1           | regulation of alternative mRNA splicing   | ---                                   | 1.22          | 1.39            | 1.01      | 1.01        | -1.00     | 1.25        | -1.13      | -1.18        | -2.51      | -1.45        | -2.11      | -2.00        |
| MBNL3       | muscleblind-like splicing reg | chrXq26.2            | mRNA processing                           | ---                                   | -1.02         | 1.04            | -1.09     | -1.09       | -1.09     | -1.07       | 1.00       | -1.02        | -1.14      | -1.08        | -1.88      | -2.26        |
| MBNL3       | muscleblind-like splicing reg | chrXq26.2            | mRNA processing                           | ---                                   | -1.07         | -1.09           | -1.00     | -1.09       | -1.01     | 1.09        | -1.21      | -1.24        | -1.06      | -1.18        | -1.93      | -2.27        |
| MBNL3       | muscleblind-like splicing reg | chrXq26.2            | mRNA processing                           | ---                                   | -1.08         | -1.11           | 1.05      | 1.05        | -1.10     | 1.03        | 1.02       | 1.09         | -2.29      | -2.08        | -6.31      | -5.55        |
| MBOAT2      | membrane bound O-acyltra      | chr2p25.1            | lipid metabolic process                   | ---                                   | -1.04         | -1.09           | 1.09      | 1.09        | 1.12      | -1.02       | 1.03       | -1.01        | -1.38      | -1.38        | -1.50      | -1.50        |
| MBOAT7      | membrane bound O-acyltra      | chr19q13.4           | lipid metabolic process                   | ---                                   | 1.09          | 1.01            | -1.11     | 1.09        | 1.01      | -1.14       | 1.18       | 1.17         | 1.39       | 1.28         | 1.54       | 1.84         |
| MBP         | myelin basic protein          | chr18q23             | immune response                           | MAPK_Cascade // GenMAPP               | 1.10          | 1.06            | 1.09      | -1.21       | -1.05     | -1.04       | 1.23       | -1.01        | 1.36       | 1.31         | 1.33       | 1.09         |
| MBP         | myelin basic protein          | chr18q23             | immune response                           | MAPK_Cascade // GenMAPP               | -1.07         | 1.09            | 1.31      | -1.25       | -1.15     | 1.11        | 1.78       | 1.61         | 2.35       | 2.30         | 1.62       | 1.58         |
| MBP         | myelin basic protein          | chr18q23             | immune response                           | MAPK_Cascade // GenMAPP               | 1.06          | -1.11           | -1.13     | -1.22       | 1.25      | 1.12        | 1.29       | -1.02        | 1.85       | 1.77         | 1.63       | 1.43         |
| MBTD1       | mbt domain containing 1       | chr17q21.33          | transcription, DNA-dependent              | ---                                   | 1.24          | 1.23            | -1.16     | -1.22       | -1.07     | 1.06        | -1.27      | -1.15        | -2.10      | -2.12        | -1.55      | -2.13        |
| MBTPS1      | membrane-bound transcript     | chr16q24             | proteolysis                               | ---                                   | 1.03          | 1.05            | 1.08      | 1.06        | -1.04     | -1.07       | 1.03       | -1.03        | -1.27      | -1.18        | -1.44      | -1.45        |
| MBTPS2      | membrane-bound transcript     | chrXp22.12-p22.11    | proteolysis                               | ---                                   | 1.04          | 1.04            | 1.06      | 1.09        | -1.07     | 1.03        | -1.13      | 1.10         | -1.32      | -1.13        | -1.37      | -1.37        |
| MCAM        | melanoma cell adhesion m      | chr11q23.3           | glomerular filtration                     | ---                                   | -1.13         | -1.10           | 1.01      | 1.01        | 1.08      | -1.08       | 1.07       | 1.03         | 1.08       | 1.03         | -1.37      | -1.16        |
| MCAM        | melanoma cell adhesion m      | chr11q23.3           | glomerular filtration                     | ---                                   | 1.04          | -1.06           | 1.04      | 1.05        | 1.01      | 1.03        | -1.02      | -1.01        | -1.14      | -1.02        | -1.41      | -1.24        |
| MCAM        | melanoma cell adhesion m      | chr11q23.3           | glomerular filtration                     | ---                                   | -1.21         | -1.18           | 1.00      | 1.03        | 1.09      | 1.02        | 1.07       | -1.03        | 1.19       | -1.06        | -1.23      | -1.22        |
| MCAM        | melanoma cell adhesion m      | chr11q23.3           | glomerular filtration                     | ---                                   | -1.17         | -1.22           | 1.05      | -1.10       | 1.04      | 1.08        | 1.05       | -1.02        | -1.01      | -1.10        | -1.36      | -1.40        |
| MCAM        | melanoma cell adhesion m      | chr11q23.3           | glomerular filtration                     | ---                                   | 1.01          | 1.05            | -1.01     | -1.01       | -1.06     | -1.08       | -1.04      | -1.03        | -1.17      | -1.19        | -1.49      | -1.42        |
| MCC         | mutated in colorectal cance   | chr5q21              | signal transduction                       | ---                                   | 1.22          | 1.22            | 1.03      | -1.08       | -1.37     | 1.02        | -1.25      | -1.02        | -1.57      | -1.09        | -1.94      | -2.76        |
| MCCC1       | methylcrotonoyl-CoA carb      | chr3q27              | leucine catabolic process                 | ---                                   | -1.07         | -1.09           | 1.05      | 1.15        | -1.04     | -1.03       | 1.19       | 1.06         | -1.51      | -1.54        | -2.51      | -1.86        |
| MCCC2       | methylcrotonoyl-CoA carb      | chr5q12-q13          | leucine catabolic process                 | ---                                   | -1.03         | -1.00           | 1.03      | 1.00        | -1.02     | 1.08        | -1.24      | -1.10        | -1.47      | -1.12        | -1.56      | -1.63        |
| MCEE        | methylmalonyl CoA epime       | chr2p13.3            | fatty acid beta-oxidation                 | ---                                   | -1.00         | 1.02            | 1.14      | 1.05        | 1.02      | -1.05       | 1.01       | 1.01         | 1.28       | 1.29         | 1.74       | 1.84         |
| MCHIR1      | melanin-concentrating hor     | chr22q13.2           | generation of precursor metabolites and   | GPCRDB_Class_A_Rhodopsin-like // GenM | 1.29          | -1.33           | -1.13     | 1.01        | 1.52      | 1.40        | 2.96       | 1.18         | 1.35       | -1.00        | -1.94      | 1.19         |
| MCL1        | myeloid cell leukemia sequ    | chr1q21              | cell fate determination                   | Apoptosis_GenMAPP // GenMAPP /// Apop | 1.09          | 1.07            | 1.03      | 1.02        | -1.00     | 1.09        | -1.09      | -1.09        | 1.81       | 1.51         | 1.70       | 1.43         |
| MCL1        | myeloid cell leukemia sequ    | chr1q21              | cell fate determination                   | ---                                   | 1.12          | 1.00            | 1.76      | 1.08        | 1.13      | 1.13        | 1.16       | 1.56         | 3.07       | 1.87         | 1.73       | 1.39         |
| MCL1        | myeloid cell leukemia sequ    | chr1q21              | cell fate determination                   | Apoptosis_GenMAPP // GenMAPP /// Apop | -1.00         | -1.01           | -1.08     | -1.06       | 1.06      | 1.02        | 1.12       | 1.06         | 2.34       | 2.16         | 1.78       | 1.88         |
| MCL1        | myeloid cell leukemia sequ    | chr1q21              | cell fate determination                   | Apoptosis_GenMAPP // GenMAPP /// Apop | 1.01          | -1.04           | 1.01      | 1.00        | 1.12      | 1.13        | 1.29       | 1.09         | 2.64       | 2.20         | 1.99       | 1.99         |
| MCL1        | myeloid cell leukemia sequ    | chr1q21              | cell fate determination                   | Apoptosis_GenMAPP // GenMAPP /// Apop | 1.08          | 1.08            | -1.04     | -1.04       | -1.00     | 1.00        | 1.09       | -1.00        | 2.13       | 1.79         | 1.65       | 1.53         |
| MCM10       | minichromosome maintena       | chr10p13             | cell cycle checkpoint                     | ---                                   | 1.02          | -1.00           | -1.03     | 1.16        | 1.08      | 1.01        | -1.10      | -1.04        | -1.40      | -1.30        | -1.14      | -1.21        |
| MCM10       | minichromosome maintena       | chr10p13             | cell cycle checkpoint                     | ---                                   | 1.07          | 1.06            | -1.05     | -1.06       | -1.08     | 1.05        | -1.12      | -1.03        | -1.26      | -1.18        | -1.20      | -1.25        |
| MCM2        | minichromosome maintena       | chr3q21              | cell cycle checkpoint                     | Cell_cycle_KEGG // GenMAPP /// DNA_re | -1.04         | -1.05           | 1.03      | 1.04        | 1.09      | 1.02        | 1.23       | 1.08         | 1.01       | -1.16        | -1.15      | -1.07        |
| MCM3        | minichromosome maintena       | chr6p12              | cell cycle checkpoint                     | Cell_cycle_KEGG // GenMAPP /// DNA_re | -1.07         | -1.01           | 1.02      | 1.11        | 1.05      | 1.00        | 1.01       | -1.11        | -1.61      | -1.36        | -1.65      | -1.50        |
| MCM3AP      | minichromosome maintena       | chr21q22.3           | DNA replication                           | ---                                   | 1.30          | 1.03            | -1.44     | -1.29       | 1.14      | 1.40        | -1.44      | -1.81        | 1.33       | 1.81         | 1.98       | 1.58         |
| MCM3AP-AS   | MCM3AP antisense RNA          | chr21q22.3           | 0                                         | ---                                   | 1.59          | 1.25            | 1.16      | 1.29        | 1.14      | 1.24        | 1.02       | 1.10         | -2.07      | -1.49        | -1.36      | -1.35        |
| MCM4        | minichromosome maintena       | chr8q11.2            | cell cycle checkpoint                     | Cell_cycle_KEGG // GenMAPP /// DNA_re | -1.12         | -1.04           | 1.10      | -1.12       | 1.13      | 1.04        | 1.06       | -1.04        | -1.32      | -1.29        | -1.57      | -1.24        |
| MCM5        | minichromosome maintena       | chr22q13.1           | cell cycle checkpoint                     | Cell_cycle_KEGG // GenMAPP /// DNA_re | -1.02         | -1.09           | 1.01      | 1.22        | 1.01      | -1.20       | 1.26       | 1.35         | 1.01       | -1.18        | -1.93      | -1.49        |
| MCM5        | minichromosome maintena       | chr22q13.1           | cell cycle checkpoint                     | Cell_cycle_KEGG // GenMAPP /// DNA_re | 1.14          | -1.08           | -1.03     | 1.29        | -1.14     | -1.06       | 1.13       | 1.12         | -1.38      | -1.23        | -2.34      | -1.69        |







| ID           | Gene Title                          | Chromosomal Location    | 1st Gene Ontology Biological Process                 | Pathway                             | A2497 30 mins | A2497P' 30 mins | A2497 2 h | A2497P' 2 h | A2497 4 h | A2497P' 4 h | A2497 24 h | A2497P' 24 h | A2497 48 h | A2497P' 48 h | A2497 72 h | A2497P' 72 h |
|--------------|-------------------------------------|-------------------------|------------------------------------------------------|-------------------------------------|---------------|-----------------|-----------|-------------|-----------|-------------|------------|--------------|------------|--------------|------------|--------------|
| MIB1         | mindbomb E3 ubiquitin proteasome    | chr18q11.2              | blood vessel development                             | ---                                 | 1.11          | 1.09            | 1.13      | 1.05        | 1.06      | 1.15        | 1.11       | 1.12         | 1.21       | 1.48         | 1.66       | 1.46         |
| MIB1         | mindbomb E3 ubiquitin proteasome    | chr18q11.2              | blood vessel development                             | ---                                 | 1.36          | -1.02           | -1.06     | -1.10       | 1.03      | -1.02       | -1.45      | -1.10        | -1.84      | -1.25        | -2.30      | -2.41        |
| MIB2         | mindbomb E3 ubiquitin proteasome    | chr1p36.33              | Notch signaling pathway                              | ---                                 | -1.03         | -1.00           | -1.06     | 1.01        | 1.21      | 1.03        | -1.01      | 1.11         | -1.33      | 1.17         | -1.63      | -1.26        |
| MICA         | MHC class I polypeptide chain       | chr6p21.33              | T cell mediated cytotoxicity                         | ---                                 | -1.06         | -1.01           | 1.00      | -1.02       | -1.02     | -1.04       | 1.02       | 1.04         | 1.99       | 1.87         | 2.77       | 2.73         |
| MICA // MIC  | MHC class I polypeptide chain       | chr6p21.3 // chr6p21.33 | T cell mediated cytotoxicity                         | ---                                 | -1.02         | -1.02           | 1.12      | 1.09        | 1.25      | 1.08        | 1.04       | -1.10        | 2.11       | 1.95         | 3.64       | 3.67         |
| MICAL2       | microtubule associated motor        | chr1p15.3               | metabolic process                                    | ---                                 | -1.04         | 1.46            | -1.43     | -1.10       | -1.56     | 1.01        | -2.58      | -3.94        | 2.41       | 1.96         | 4.46       | 5.11         |
| MICAL2       | microtubule associated motor        | chr1p15.3               | metabolic process                                    | ---                                 | -1.00         | -1.00           | -1.25     | -1.21       | 1.37      | 1.05        | 1.17       | 1.01         | 4.00       | 3.37         | 2.73       | 3.18         |
| MICAL2       | microtubule associated motor        | chr1p15.3               | metabolic process                                    | ---                                 | -1.08         | -1.07           | -1.19     | -1.34       | 1.12      | 1.05        | 1.23       | 1.02         | 3.40       | 2.87         | 2.59       | 3.11         |
| MICALL1      | MICAL-like 1                        | chr22q13.1              | 0                                                    | ---                                 | -1.05         | -1.15           | 1.04      | 1.23        | -1.00     | -1.05       | 1.10       | 1.28         | 1.15       | -1.32        | -1.48      | -1.56        |
| MICALL2      | MICAL-like 2                        | chr7p22.3               | endocytosis                                          | ---                                 | 2.78          | 2.22            | 1.09      | 1.06        | -1.48     | -2.32       | -1.80      | 1.18         | 1.52       | 1.40         | 1.67       | 1.40         |
| MICB         | MHC class I polypeptide chain       | chr6p21.3               | T cell mediated cytotoxicity                         | ---                                 | 1.14          | 1.01            | 1.04      | 1.05        | -1.09     | 1.07        | -1.23      | -1.02        | 1.35       | 1.47         | 1.56       | 1.48         |
| MICU1        | mitochondrial calcium uptake        | chr10q22.1              | transport                                            | ---                                 | -1.01         | -1.06           | 1.04      | 1.11        | 1.09      | 1.02        | 1.10       | -1.04        | 1.20       | 1.20         | -1.19      | -1.01        |
| MICU2        | mitochondrial calcium uptake        | chr13q12.11             | mitochondrial calcium ion transport                  | ---                                 | 1.15          | 1.11            | 1.03      | 1.07        | -1.04     | 1.11        | -1.12      | -1.11        | -1.48      | -1.43        | -1.42      | -1.56        |
| MID1         | midline 1 (Opitz/BBB syndrome)      | chrXp22                 | microtubule cytoskeleton organization                | ---                                 | 1.27          | 1.09            | 1.38      | 1.46        | 1.05      | 1.09        | 1.04       | 1.27         | -1.92      | -1.75        | -2.00      | -1.53        |
| MID1         | midline 1 (Opitz/BBB syndrome)      | chrXp22                 | microtubule cytoskeleton organization                | ---                                 | 1.03          | 1.03            | 1.05      | 1.01        | -1.03     | -1.03       | -1.03      | 1.10         | -1.18      | -1.06        | 1.02       | -1.01        |
| MID2         | midline 2                           | chrXq22.3               | protein ubiquitination                               | ---                                 | -1.07         | 1.04            | 1.11      | 1.15        | 1.21      | 1.12        | -1.07      | 1.08         | -1.05      | 1.36         | -1.04      | 1.08         |
| MID2         | midline 2                           | chrXq22.3               | protein ubiquitination                               | ---                                 | -1.02         | -1.04           | 1.05      | 1.05        | 1.15      | 1.01        | 1.32       | 1.13         | 2.19       | 2.15         | 1.61       | 1.62         |
| MIDN         | midnolin                            | chr19p13.3              | 0                                                    | ---                                 | -1.03         | -1.05           | -1.10     | 1.04        | -1.33     | -1.16       | -1.14      | -1.06        | 1.44       | 1.29         | 1.29       | 1.08         |
| MIER1        | mesoderm induction early response   | chr1p31.3               | transcription, DNA-dependent                         | ---                                 | 1.02          | -1.02           | 1.05      | 1.08        | 1.06      | -1.02       | 1.10       | -1.03        | 1.37       | 1.42         | 1.57       | 1.32         |
| MIER2        | mesoderm induction early response   | chr19p13.3              | transcription, DNA-dependent                         | ---                                 | 1.09          | 1.23            | -1.08     | -1.29       | -1.57     | -1.50       | 1.33       | 1.54         | 1.34       | 1.01         | 2.67       | 2.64         |
| MIER2        | mesoderm induction early response   | chr19p13.3              | transcription, DNA-dependent                         | ---                                 | -1.09         | -1.18           | 1.09      | 1.04        | -1.09     | -1.34       | 1.09       | 1.09         | 1.59       | 1.19         | 1.09       | 1.69         |
| MIER3        | mesoderm induction early response   | chr5q11.2               | transcription, DNA-dependent                         | ---                                 | 1.15          | 1.23            | 1.13      | -1.06       | -1.27     | -1.11       | -1.37      | -1.26        | -1.51      | -1.49        | -1.01      | -1.46        |
| MIIIP        | migration and invasion inhibitor    | chr1p36.22              | 0                                                    | ---                                 | -1.13         | -1.12           | -1.10     | -1.05       | -1.57     | -1.17       | -1.16      | -1.10        | 1.00       | 1.17         | 1.46       | 1.83         |
| MIIIP        | migration and invasion inhibitor    | chr1p36.22              | 0                                                    | ---                                 | 1.03          | 1.00            | 1.18      | 1.22        | 1.21      | -1.10       | 1.54       | 1.12         | 1.51       | -1.00        | 1.38       | 1.36         |
| MILR1        | mast cell immunoglobulin-like       | chr17q23.3              | negative regulation of mast cell activation          | ---                                 | 1.20          | -1.13           | -1.52     | -1.02       | 1.26      | 1.03        | 1.09       | 1.19         | 4.36       | 3.08         | 3.39       | 3.53         |
| MINA         | MYC induced nuclear antigen         | chr3q11.2               | negative regulation of transcription from            | ---                                 | -1.13         | -1.04           | 1.04      | 1.10        | 1.02      | -1.04       | -1.05      | -1.05        | -1.89      | -1.35        | -1.55      | -1.50        |
| MINA         | MYC induced nuclear antigen         | chr3q11.2               | negative regulation of transcription from            | ---                                 | 1.09          | 1.14            | 1.10      | 1.15        | 1.04      | 1.00        | 1.07       | 1.18         | -1.31      | -1.33        | -1.37      | -1.34        |
| MINA         | MYC induced nuclear antigen         | chr3q11.2               | negative regulation of transcription from            | ---                                 | -1.01         | -1.02           | 1.12      | -1.01       | 1.10      | 1.19        | 1.07       | -1.05        | -1.47      | -1.68        | -1.28      | -1.23        |
| MINK1        | misshapen-like kinase 1             | chr17p13.2              | regulation of cell-matrix adhesion                   | ---                                 | -1.06         | -1.10           | 1.09      | 1.20        | 1.03      | 1.15        | 1.00       | 1.09         | 1.27       | 1.31         | 1.20       | 1.46         |
| MINK1        | misshapen-like kinase 1             | chr17p13.2              | regulation of cell-matrix adhesion                   | ---                                 | -1.04         | -1.07           | 1.02      | 1.22        | -1.01     | 1.04        | 1.01       | 1.11         | 1.32       | 1.30         | 1.09       | 1.32         |
| MINK1        | misshapen-like kinase 1             | chr17p13.2              | regulation of cell-matrix adhesion                   | ---                                 | -1.11         | -1.22           | 1.03      | 1.21        | -1.00     | 1.10        | 1.16       | 1.16         | 1.32       | 1.28         | 1.19       | 1.49         |
| MINK1        | misshapen-like kinase 1             | chr17p13.2              | regulation of cell-matrix adhesion                   | ---                                 | -1.13         | -1.21           | 1.11      | 1.14        | 1.15      | 1.08        | 1.18       | 1.00         | 1.32       | 1.13         | 1.21       | 1.44         |
| MINOS1       | mitochondrial inner membrane        | chr1p36.13              | 0                                                    | ---                                 | 1.11          | -1.21           | -1.03     | 1.12        | -1.05     | -1.05       | -1.09      | -1.10        | -1.91      | -1.41        | -2.42      | -2.35        |
| MINOS1-NB    | MINOS1-NBL1 readthrough             | chr1p36.13              | nervous system development                           | ---                                 | -1.10         | -1.12           | -1.02     | -1.05       | 1.07      | -1.01       | 1.06       | -1.02        | 1.55       | 1.39         | 1.50       | 1.46         |
| MIOS         | missing oocyte, meiosis regulator   | chr7p21.3               | 0                                                    | ---                                 | 1.63          | 1.79            | 1.54      | 1.53        | -1.04     | 1.63        | -1.92      | -1.48        | -5.30      | -6.89        | -5.16      | -5.63        |
| MIPEP        | mitochondrial intermediate filament | chr13q12                | proteolysis                                          | ---                                 | -1.08         | -1.05           | -1.02     | -1.13       | 1.12      | 1.05        | -1.05      | 1.05         | -1.56      | -1.16        | -1.90      | -1.71        |
| MIPEP        | mitochondrial intermediate filament | chr13q12                | proteolysis                                          | ---                                 | 1.02          | 1.10            | 1.15      | 1.04        | 1.06      | 1.15        | -1.07      | -1.11        | -1.79      | -1.24        | -1.92      | -1.83        |
| MIPOL1       | mirror-image polydactyly 1          | chr14q13.3              | 0                                                    | ---                                 | -1.12         | -1.05           | -1.01     | 1.33        | 1.15      | -1.16       | 1.10       | 1.00         | -1.53      | -1.43        | -1.20      | -1.55        |
| MIR100HG     | mir-100-let-7a-2 cluster host       | chr11q24.1              | 0                                                    | ---                                 | 1.17          | 1.06            | 1.19      | 1.10        | 1.01      | 1.06        | -1.09      | -1.14        | 1.10       | 1.23         | 1.67       | 1.50         |
| MIR1257 // T | microRNA 1257 // TAF4               | chr20q13.33             | ovarian follicle development                         | ---                                 | 1.39          | 1.44            | 1.02      | -1.07       | -1.15     | -1.11       | -1.21      | -1.02        | -1.58      | -1.69        | -1.24      | -1.41        |
| MIR1292 // T | microRNA 1292 // NOP56              | chr20p13                | rRNA processing                                      | ---                                 | -1.03         | -1.08           | 1.06      | 1.09        | 1.14      | 1.04        | 1.06       | -1.03        | -1.11      | -1.34        | -1.24      | -1.08        |
| MIR1292 // T | microRNA 1292 // NOP56              | chr20p13                | rRNA processing                                      | ---                                 | -1.02         | -1.05           | -1.04     | 1.11        | -1.04     | -1.11       | 1.11       | 1.18         | 1.01       | -1.33        | -1.27      | -1.16        |
| MIR1304 // S | microRNA 1304 // small nuclear      | chr11q21                | transcription, DNA-dependent                         | ---                                 | 1.02          | 1.02            | -1.02     | 1.04        | -1.03     | 1.04        | 1.13       | 1.02         | 1.31       | 1.30         | 1.44       | 1.38         |
| MIR1304 // S | microRNA 1304 // small nuclear      | chr11q21                | transcription, DNA-dependent                         | ---                                 | 1.10          | -1.00           | -1.01     | 1.06        | -1.09     | 1.07        | 1.08       | -1.05        | 1.03       | 1.04         | 1.18       | 1.13         |
| MIR155 // M  | microRNA 155 // MIR155              | chr21q21.3              | 0                                                    | ---                                 | -1.28         | 1.22            | -1.08     | -1.02       | 1.19      | 1.17        | -1.01      | -1.04        | -2.27      | -1.71        | -2.24      | -1.64        |
| MIR181A2HG   | MIR181A2 host gene (non-protein     | chr9q33.3               | 0                                                    | ---                                 | -1.03         | -1.49           | -1.05     | -1.07       | 1.08      | -1.12       | -1.03      | -1.02        | -2.54      | -2.32        | -1.35      | -1.31        |
| MIR1909 // T | microRNA 1909 // REX1               | chr19p13.3              | nucleic acid phosphodiester bond hydrolysis          | ---                                 | 1.03          | -1.00           | 1.01      | 1.04        | 1.13      | 1.07        | 1.08       | 1.05         | 1.41       | 1.22         | 1.32       | 1.26         |
| MIR21 // VM  | microRNA 21 // vacuole              | chr17q23.1              | autophagy                                            | ---                                 | -1.02         | 1.03            | -1.01     | 1.03        | -1.00     | 1.01        | 1.06       | 1.06         | -1.22      | -1.19        | 1.03       | -1.05        |
| MIR210HG     | MIR210 host gene (non-protein       | chr1p15.5               | 0                                                    | ---                                 | 1.02          | -1.06           | 1.12      | 1.37        | 1.43      | 1.26        | 1.51       | 1.55         | 1.55       | 2.00         | 3.93       | 5.61         |
| MIR210HG     | MIR210 host gene (non-protein       | chr1p15.5               | 0                                                    | ---                                 | -1.10         | -1.11           | 1.11      | 1.29        | -1.07     | -1.50       | 1.34       | 1.52         | 2.11       | 2.02         | 2.74       | 3.79         |
| MIR22 // M   | microRNA 22 // MIR22                | chr17p13.3              | 0                                                    | ---                                 | -1.09         | -1.05           | 1.05      | -1.05       | 1.09      | 1.02        | -1.57      | -1.26        | 2.44       | 1.14         | 3.83       | 2.64         |
| MIR31HG      | MIR31 host gene (non-protein        | chr9p21.3               | 0                                                    | ---                                 | -1.26         | -1.26           | -1.04     | -1.16       | 1.14      | 1.04        | 1.34       | 1.03         | 1.34       | 1.10         | 2.40       | 2.42         |
| MIR3656 // T | microRNA 3656 // trafficker         | chr11q23.3              | transport                                            | ---                                 | 1.22          | 1.28            | 1.54      | 1.20        | 1.01      | -1.17       | 1.27       | 1.11         | 1.29       | -1.01        | 1.04       | 1.96         |
| MIR3658 // T | microRNA 3658 // uridine            | chr1q23                 | pyrimidine nucleobase metabolic process              | ---                                 | -1.01         | 1.02            | -1.01     | 1.01        | 1.08      | -1.05       | 1.16       | 1.09         | 1.54       | 1.28         | 1.47       | 1.29         |
| MIR3682      | microRNA 3682                       | ---                     | 0                                                    | ---                                 | 1.19          | 1.20            | -1.10     | -1.26       | 1.04      | 1.08        | -2.84      | -1.18        | -2.01      | -1.51        | -1.54      | -3.43        |
| MIR4647 // S | microRNA 4647 // solute             | chr6p12.1-p11.2         | carbohydrate metabolic process                       | ---                                 | 1.02          | -1.02           | 1.01      | -1.16       | 1.01      | 1.03        | -1.08      | -1.09        | 1.08       | 1.14         | 1.23       | 1.28         |
| MIR4680 // T | microRNA 4680 // program            | chr10q24                | apoptotic process                                    | ---                                 | 1.10          | 1.01            | -1.01     | 1.02        | -1.18     | 1.00        | -1.36      | -1.04        | -1.55      | -1.27        | -1.39      | -1.23        |
| MIR4680 // T | microRNA 4680 // program            | chr10q24                | apoptotic process                                    | ---                                 | 1.15          | 1.08            | 1.04      | 1.05        | 1.02      | 1.08        | -1.20      | -1.12        | -1.46      | -1.44        | 1.03       | 1.05         |
| MIR4680 // T | microRNA 4680 // program            | chr10q24                | apoptotic process                                    | ---                                 | -1.09         | -1.15           | 1.05      | 1.17        | 1.01      | 1.21        | -1.17      | -1.02        | -1.48      | -1.21        | -1.13      | 1.04         |
| MIR4680 // T | microRNA 4680 // program            | chr10q24                | apoptotic process                                    | ---                                 | 1.02          | 1.09            | -1.03     | 1.12        | -1.13     | -1.01       | -1.22      | -1.04        | -1.25      | -1.05        | -1.26      | -1.31        |
| MIR4691 // T | microRNA 4691 // NADH               | chr1q13                 | mitochondrial electron transport, NADH dehydrogenase | Electron_Transport_Chain // GenMAPP | -1.08         | -1.14           | -1.00     | 1.08        | 1.23      | 1.18        | -1.14      | 1.01         | -1.52      | 1.04         | -1.28      | -1.27        |
| MIR4691 // T | microRNA 4691 // NADH               | chr1q13                 | mitochondrial electron transport, NADH dehydrogenase | Electron_Transport_Chain // GenMAPP | -1.07         | -1.09           | 1.08      | 1.09        | -1.01     | -1.10       | 1.12       | -1.01        | 1.64       | 1.29         | 1.16       | 1.17         |
| MIR4697HG    | MIR4697 host gene (non-protein      | chr11q25                | 0                                                    | ---                                 | 1.02          | -2.60           | 2.09      | 1.23        | -8.82     | -2.24       | 1.52       | 1.28         | 1.04       | 1.18         | 2.15       | 3.16         |
| MIR4723 // T | microRNA 4723 // transmembrane      | chr11q11.2              | 0                                                    | ---                                 | -1.01         | -1.07           | 1.01      | -1.09       | 1.06      | 1.03        | 1.07       | -1.33        | -1.27      | -1.31        | -1.40      | -1.40        |
| MIR4745 // T | microRNA 4745 // polypyrimidine     | chr19p13.3              | alternative mRNA splicing, via spliceosome           | mRNA_processing_Reactome // GenMAPP | -1.10         | 1.05            | -1.02     | -1.10       | -1.05     | 1.06        | 1.06       | 1.10         | 1.55       | 1.47         | 1.35       | 1.39         |
| MIR4746 // T | microRNA 4746 // UBX domain         | chr19p13                | 0                                                    | ---                                 | 1.03          | 1.02            | 1.10      | 1.02        | 1.06      | 1.03        | 1.24       | 1.10         | 1.27       | 1.08         | 1.19       | 1.26         |

| ID       | Gene Title                  | Chromosomal Location | 1st Gene Ontology Biological Process      | Pathway                              | A2497 30 mins | A2497P' 30 mins | A2497 2 h | A2497P' 2 h | A2497 4 h | A2497P' 4 h | A2497 24 h | A2497P' 24 h | A2497 48 h | A2497P' 48 h | A2497 72 h | A2497P' 72 h |
|----------|-----------------------------|----------------------|-------------------------------------------|--------------------------------------|---------------|-----------------|-----------|-------------|-----------|-------------|------------|--------------|------------|--------------|------------|--------------|
| MIR4800  | MIR4800                     | chr4p16.3            | negative regulation of transcription from | ---                                  | -1.08         | -1.06           | -1.07     | -1.08       | 1.07      | -1.05       | -1.12      | -1.01        | -1.94      | -1.96        | -1.61      | -1.28        |
| MIR4800  | MIR4800                     | chr4p16.3            | negative regulation of transcription from | ---                                  | -1.08         | -1.19           | 1.21      | -1.23       | -1.21     | -1.34       | -1.25      | 1.01         | -2.42      | -1.98        | -1.83      | -1.39        |
| MIR4800  | MIR4800                     | chr4p16.3            | negative regulation of transcription from | ---                                  | 1.03          | 1.08            | -1.17     | -1.13       | -1.06     | -1.17       | 1.09       | -1.07        | -1.14      | -1.44        | -1.30      | -1.32        |
| MIR5193  | MIR5193                     | chr3p21              | cellular protein modification process     | Proteasome_Degradation // GenMAPP    | -1.71         | -1.29           | -2.05     | -1.03       | 1.47      | 1.54        | 1.17       | -1.12        | 1.53       | -1.05        | 1.91       | 1.59         |
| MIR5193  | MIR5193                     | chr3p21              | cellular protein modification process     | Proteasome_Degradation // GenMAPP    | 1.10          | -1.60           | -1.84     | -5.46       | -1.27     | -1.22       | 1.04       | 1.52         | 2.71       | 1.37         | 3.11       | 2.49         |
| MIR600   | MIR600                      | chr9q33.3            | 0                                         | ---                                  | -1.46         | 1.14            | -3.87     | -3.72       | -2.26     | -2.15       | -2.96      | 1.11         | -1.91      | -1.73        | -2.12      | -1.23        |
| MIR612   | MIR612                      | chr11q13.1           | multicellular organismal development      | ---                                  | 1.52          | 2.11            | 1.19      | 1.29        | 1.81      | 1.51        | 2.00       | 2.16         | -1.51      | -1.73        | 1.30       | 1.13         |
| MIR612   | MIR612                      | chr11q13.1           | 0                                         | ---                                  | 1.28          | 1.05            | 1.01      | 1.40        | -1.03     | 1.29        | 1.00       | -1.11        | -1.46      | -1.31        | -1.60      | -1.20        |
| MIR612   | MIR612                      | chr11q13.1           | 0                                         | ---                                  | 1.06          | 1.30            | -1.16     | -2.32       | 1.53      | 1.10        | 1.16       | -1.02        | -1.59      | -3.18        | -1.70      | -1.80        |
| MIR631   | MIR631                      | chr15q24.2           | DNA repair                                | ---                                  | 1.13          | 1.17            | -1.16     | -1.05       | 1.39      | 1.17        | 1.25       | -1.14        | -1.29      | -1.57        | -2.31      | -2.00        |
| MIR636   | MIR636                      | chr17q25.1           | mRNA splicing, via spliceosome            | mRNA_processing_Reactome // GenMAPP  | 1.13          | 1.11            | 1.00      | -1.02       | -1.13     | -1.09       | -1.18      | -1.23        | -1.53      | -1.57        | -1.41      | -1.62        |
| MIR636   | MIR636                      | chr17q25.1           | mRNA splicing, via spliceosome            | mRNA_processing_Reactome // GenMAPP  | 1.09          | 1.16            | 1.01      | -1.05       | 1.01      | -1.04       | -1.01      | -1.10        | -1.30      | -1.42        | -1.30      | -1.56        |
| MIR636   | MIR636                      | chr17q25.1           | mRNA splicing, via spliceosome            | mRNA_processing_Reactome // GenMAPP  | -1.03         | 1.05            | -1.01     | -1.05       | 1.02      | -1.05       | -1.02      | -1.02        | -1.26      | -1.37        | -1.26      | -1.45        |
| MIR943   | MIR943                      | chr4p16.3            | transcription, DNA-dependent              | ---                                  | 1.03          | -1.10           | -1.06     | -1.01       | -1.06     | 1.02        | 1.05       | 1.02         | 1.20       | 1.12         | 1.29       | 1.23         |
| MIR943   | MIR943                      | chr4p16.3            | transcription, DNA-dependent              | ---                                  | -1.04         | -1.09           | -1.23     | -1.37       | -1.04     | 1.02        | 1.17       | 1.14         | 1.02       | -1.02        | 1.36       | 1.47         |
| MIRLET7B | MIRLET7B                    | chr22q13.31          | 0                                         | ---                                  | 1.32          | -1.49           | 1.39      | 1.16        | 1.37      | 1.49        | -1.07      | -1.11        | -1.94      | -6.13        | -1.13      | -1.28        |
| MIRLET7D | MIRLET7D                    | chr9q22.32           | 0                                         | ---                                  | 1.38          | 1.31            | 1.02      | 1.04        | 1.17      | 1.11        | -1.24      | -1.48        | -2.20      | -1.73        | -1.88      | -1.71        |
| MIS12    | MIS12                       | chr17p13.2           | M phase of mitotic cell cycle             | ---                                  | 1.03          | 1.03            | 1.02      | 1.01        | 1.06      | 1.02        | -1.06      | -1.08        | -1.01      | -1.01        | 1.35       | 1.24         |
| MIS18A   | MIS18A                      | chr21q22.11          | nucleosome assembly                       | ---                                  | 1.14          | 1.08            | 1.08      | 1.03        | -1.13     | 1.05        | -1.21      | -1.10        | 1.16       | 1.23         | 1.16       | 1.11         |
| MIS18A   | MIS18A                      | chr21q22.11          | nucleosome assembly                       | ---                                  | -1.04         | -1.08           | 1.10      | 1.01        | 1.16      | 1.05        | -1.01      | -1.05        | 1.42       | 1.31         | 1.25       | 1.27         |
| MIS18A   | MIS18A                      | chr21q22.11          | nucleosome assembly                       | ---                                  | -1.11         | -1.01           | 1.00      | 1.00        | 1.05      | -1.07       | -1.05      | 1.17         | 1.21       | 1.38         | 1.40       | 1.40         |
| MISP     | MISP                        | chr19p13.3           | cell cycle                                | ---                                  | -1.12         | -1.10           | -1.01     | -1.10       | -1.03     | -1.01       | 1.10       | 1.14         | 1.17       | -1.12        | 1.17       | -1.01        |
| MITF     | MITF                        | chr3p14.2-p14.1      | transcription, DNA-dependent              | ---                                  | -1.22         | -1.10           | -1.05     | -1.24       | 1.01      | -1.12       | 1.02       | -1.11        | -2.01      | -1.76        | -1.14      | -1.36        |
| MITF     | MITF                        | chr3p14.2-p14.1      | transcription, DNA-dependent              | ---                                  | 1.03          | -1.01           | -1.03     | -1.05       | -1.08     | -1.00       | 1.08       | 1.05         | -1.50      | -1.28        | -1.05      | -1.10        |
| MKI67    | MKI67                       | chr10q26.2           | DNA metabolic process                     | ---                                  | 1.13          | 1.10            | -1.10     | -1.25       | 1.02      | 1.03        | -1.25      | -1.03        | 1.21       | 1.24         | 1.91       | 1.75         |
| MKI67    | MKI67                       | chr10q26.2           | DNA metabolic process                     | ---                                  | -1.09         | -1.04           | 1.03      | 1.03        | 1.11      | -1.05       | 1.06       | 1.07         | 2.05       | 1.61         | 2.20       | 2.20         |
| MKI67IP  | MKI67 (FHA domain) inte     | chr2q14.3            | protein complex assembly                  | ---                                  | -1.08         | 1.04            | -1.13     | -1.16       | -1.10     | -1.07       | -1.10      | 1.07         | -1.40      | -1.35        | -1.01      | -1.18        |
| MKI67IP  | MKI67 (FHA domain) inte     | chr2q14.3            | protein complex assembly                  | ---                                  | -1.07         | -1.04           | 1.03      | 1.03        | -1.09     | -1.11       | 1.07       | 1.11         | 1.26       | 1.13         | 1.48       | 1.49         |
| MKKS     | McKusick-Kaufman syndr      | chr20p12             | heart looping                             | ---                                  | 1.11          | 1.17            | 1.02      | -1.03       | -1.13     | -1.02       | -1.04      | 1.01         | -1.34      | -1.47        | -1.09      | -1.32        |
| MKKS     | McKusick-Kaufman syndr      | chr20p12             | heart looping                             | ---                                  | -1.03         | -1.08           | 1.01      | 1.03        | 1.00      | -1.02       | 1.08       | 1.06         | 1.44       | 1.38         | 1.15       | 1.14         |
| MKL2     | MKL/myocardin-like 2        | chr16p13.12          | in utero embryonic development            | ---                                  | 1.17          | -1.08           | -1.01     | 1.08        | -1.27     | 1.02        | -1.46      | -1.20        | -2.33      | -1.74        | -1.69      | -1.61        |
| MKL2     | MKL/myocardin-like 2        | chr16p13.12          | in utero embryonic development            | ---                                  | -1.15         | 1.01            | -1.16     | -3.15       | 2.04      | 1.82        | 1.52       | -1.03        | 4.56       | 3.74         | 1.96       | 1.61         |
| MKL2     | MKL/myocardin-like 2        | chr16p13.12          | in utero embryonic development            | ---                                  | 1.46          | 1.23            | -1.01     | 1.21        | -1.05     | 1.08        | -1.03      | 1.09         | 3.19       | 3.70         | 2.77       | 2.55         |
| MKLN1    | muskelin 1, intracellular m | chr7q32              | signal transduction                       | ---                                  | -1.03         | -1.05           | 1.07      | 1.13        | 1.05      | 1.07        | 1.26       | 1.18         | -1.22      | -1.17        | -1.64      | -1.27        |
| MKLN1    | muskelin 1, intracellular m | chr7q32              | cell adhesion                             | ---                                  | -1.06         | -1.06           | 1.04      | 1.06        | 1.01      | -1.07       | 1.15       | 1.03         | 1.31       | 1.24         | 1.38       | 1.55         |
| MKLN1    | muskelin 1, intracellular m | chr7q32              | cell adhesion                             | ---                                  | -1.43         | -4.50           | -1.22     | -1.70       | 1.24      | 1.16        | 1.18       | -1.42        | -1.20      | 1.21         | -1.37      | 1.23         |
| MKLN1    | muskelin 1, intracellular m | chr7q32              | cell adhesion                             | ---                                  | -1.08         | -1.02           | -1.07     | -1.10       | 1.08      | -1.06       | 1.17       | -1.00        | -1.68      | -1.30        | -1.42      | -1.39        |
| MKNK1    | MAP kinase interacting ser  | chr1p33              | regulation of translation                 | ---                                  | 1.02          | 1.05            | 1.09      | 1.15        | 1.00      | -1.04       | -1.16      | 1.03         | -1.30      | -1.37        | -1.41      | -1.54        |
| MKNK1    | MAP kinase interacting ser  | chr1p33              | regulation of translation                 | ---                                  | -1.04         | -1.03           | -1.00     | -1.01       | 1.03      | 1.03        | -1.06      | -1.06        | -1.43      | -1.31        | -1.31      | -1.08        |
| MKNK2    | MAP kinase interacting ser  | chr19p13.3           | regulation of translation                 | ---                                  | -1.11         | -1.04           | 1.00      | 1.10        | 1.17      | 1.11        | -1.17      | -1.10        | 1.10       | 1.25         | 1.17       | 1.40         |
| MKNK2    | MAP kinase interacting ser  | chr19p13.3           | regulation of translation                 | ---                                  | -1.09         | -1.07           | -1.06     | 1.07        | -1.06     | -1.03       | -1.06      | 1.03         | 1.31       | 1.24         | 1.09       | 1.19         |
| MKRN1    | makorin ring finger protein | chr7q34              | protein ubiquitination                    | ---                                  | -1.10         | -1.13           | -1.03     | 1.09        | -1.13     | -1.05       | 1.19       | 1.18         | 1.69       | 1.49         | 1.54       | 1.45         |
| MKRN2    | makorin ring finger protein | chr3p25              | protein ubiquitination                    | ---                                  | 1.02          | 1.09            | 1.14      | 1.08        | 1.14      | -1.00       | 1.23       | 1.13         | 1.06       | 1.07         | 1.26       | 1.29         |
| MKRN2    | makorin ring finger protein | chr3p25              | protein ubiquitination                    | ---                                  | -1.22         | -1.09           | -1.28     | -1.02       | -1.05     | -1.17       | -1.00      | -1.30        | 1.50       | 1.35         | 1.92       | 2.01         |
| MKS1     | Meckel syndrome, type 1     | chr17q22             | cell projection organization              | ---                                  | -1.12         | -1.32           | -1.17     | 1.13        | 1.20      | -1.02       | -1.33      | -1.13        | -1.30      | -1.49        | -1.47      | -1.57        |
| MLF1     | myeloid leukemia factor 1   | chr3q25.1            | myeloid progenitor cell differentiation   | ---                                  | -1.12         | -1.29           | 1.03      | -1.05       | 1.00      | -1.05       | 1.23       | 1.06         | 1.20       | 1.48         | 1.46       | 1.40         |
| MLF1IP   | MLF1 interacting protein    | chr4q35.1            | M phase of mitotic cell cycle             | ---                                  | 1.02          | 1.09            | -1.02     | -1.00       | 1.03      | -1.06       | -1.06      | -1.10        | -1.44      | -1.40        | -1.17      | -1.30        |
| MLF1IP   | MLF1 interacting protein    | chr4q35.1            | mitotic cell cycle                        | ---                                  | 1.11          | 1.12            | -1.02     | -1.01       | 1.03      | 1.04        | -1.15      | -1.07        | -1.82      | -1.76        | -1.48      | -1.66        |
| MLF1IP   | MLF1 interacting protein    | chr4q35.1            | mitotic cell cycle                        | ---                                  | -1.04         | -1.11           | 1.01      | 1.07        | 1.02      | 1.14        | -1.07      | -1.01        | -1.61      | -2.09        | -2.26      | -2.27        |
| MLF2     | myeloid leukemia factor 2   | chr12p13             | defense response                          | ---                                  | 1.05          | -1.04           | -1.02     | -1.01       | -1.06     | 1.03        | -1.01      | 1.05         | 1.27       | 1.23         | 1.10       | 1.10         |
| MLH1     | mutL homolog 1, colon can   | chr3p21.3            | pachytene                                 | Ovarian_Infertility_Genes // GenMAPP | 1.10          | 1.07            | 1.01      | 1.01        | 1.04      | 1.06        | 1.02       | 1.00         | -1.55      | -1.54        | -1.54      | -1.53        |
| MLH3     | mutL homolog 3 (E. coli)    | chr14q24.3           | ATP catabolic process                     | ---                                  | -1.01         | -1.03           | -1.03     | 1.15        | 1.23      | 1.08        | 1.37       | 1.19         | 1.14       | 1.08         | 1.18       | 1.34         |
| MLH3     | mutL homolog 3 (E. coli)    | chr14q24.3           | ATP catabolic process                     | ---                                  | 1.02          | -1.03           | 1.09      | 1.05        | 1.37      | 1.08        | 1.23       | 1.04         | 1.07       | 1.12         | 1.28       | 1.33         |
| MLK7-AS1 | MLK7 antisense RNA 1        | chr2q31.1            | 0                                         | ---                                  | -1.22         | 1.01            | -1.38     | -1.14       | 1.42      | 2.04        | -1.04      | -2.12        | 37.87      | 36.03        | 1.38       | -1.09        |
| MLKL     | mixed lineage kinase doma   | chr16q23.1           | protein phosphorylation                   | ---                                  | 1.01          | -1.02           | -1.00     | 1.16        | 1.06      | -1.01       | -1.01      | 1.13         | 1.48       | 1.13         | 1.07       | 1.17         |
| MLLT1    | myeloid/lymphoid or mixed   | chr19p13.3           | transcription, DNA-dependent              | ---                                  | 1.11          | 1.17            | 1.11      | 1.18        | -1.04     | -1.10       | 1.18       | 1.13         | 1.03       | -1.15        | -1.25      | -1.35        |
| MLLT10   | myeloid/lymphoid or mixed   | chr10p12             | transcription, DNA-dependent              | ---                                  | -1.02         | -1.19           | 1.16      | 1.24        | 1.05      | 1.17        | -1.14      | -1.39        | 1.05       | -1.02        | 1.73       | 1.27         |
| MLLT11   | myeloid/lymphoid or mixed   | chr1q21              | positive regulation of apoptotic process  | ---                                  | -1.03         | -1.07           | -1.15     | -1.01       | -1.04     | 1.06        | -1.75      | -1.32        | -1.16      | 1.05         | -1.41      | -1.37        |
| MLLT3    | myeloid/lymphoid or mixed   | chr9p22              | transcription, DNA-dependent              | ---                                  | -1.08         | 1.07            | 1.01      | -1.08       | -1.06     | 1.02        | -1.27      | -1.14        | -1.62      | -1.14        | -1.36      | -1.58        |
| MLLT3    | myeloid/lymphoid or mixed   | chr9p22              | transcription, DNA-dependent              | ---                                  | -1.09         | 1.04            | 1.06      | 1.10        | 1.02      | -1.08       | 1.15       | -1.01        | -1.70      | -1.25        | -1.35      | -1.29        |
| MLLT4    | myeloid/lymphoid or mixed   | chr6q27              | cell adhesion                             | ---                                  | 1.00          | 1.02            | 1.03      | -1.00       | 1.03      | -1.04       | -1.14      | 1.01         | -1.45      | -1.41        | -1.40      | -1.48        |
| MLLT6    | myeloid/lymphoid or mixed   | chr17q21             | regulation of transcription, DNA-depend   | ---                                  | -1.02         | -1.06           | 1.07      | 1.07        | 1.14      | 1.03        | -1.01      | 1.02         | -1.21      | -1.30        | -1.22      | -1.07        |
| MLLT6    | myeloid/lymphoid or mixed   | chr17q21             | regulation of transcription, DNA-depend   | ---                                  | -1.26         | 1.23            | -1.13     | 3.50        | -1.13     | 2.93        | 3.29       | 8.73         | 16.66      | 5.95         | -1.82      | 3.01         |
| MLLT6    | myeloid/lymphoid or mixed   | chr17q21             | regulation of transcription, DNA-depend   | ---                                  | -1.00         | -1.04           | 1.15      | -1.03       | 1.03      | 1.23        | -1.11      | -1.13        | -1.51      | -1.41        | -1.38      | -1.31        |
| MLPH     | melanophilin                | chr2q37.3            | protein targeting                         | ---                                  | 1.19          | 1.14            | -1.15     | 1.07        | 1.02      | 1.30        | -1.80      | -1.46        | 2.26       | 1.42         | 2.08       | 1.36         |
| MLX      | MLX, MAX dimerization       | chr17q21.1           | energy reserve metabolic process          | ---                                  | 1.02          | 1.05            | -1.06     | -1.01       | 1.12      | -1.01       | 1.27       | 1.10         | 1.08       | 1.02         | 1.30       | 1.12         |

| ID        | Gene Title                   | Chromosomal Location | 1st Gene Ontology Biological Process      | Pathway                                | A2497 30 mins | A2497P' 30 mins | A2497 2 h | A2497P' 2 h | A2497 4 h | A2497P' 4 h | A2497 24 h | A2497P' 24 h | A2497 48 h | A2497P' 48 h | A2497 72 h | A2497P' 72 h |
|-----------|------------------------------|----------------------|-------------------------------------------|----------------------------------------|---------------|-----------------|-----------|-------------|-----------|-------------|------------|--------------|------------|--------------|------------|--------------|
| MLX       | MLX, MAX dimerization        | chr17q21.1           | energy reserve metabolic process          | ---                                    | -1.07         | -1.07           | -1.04     | 1.01        | -1.01     | 1.04        | 1.15       | 1.15         | 1.21       | 1.21         | 1.18       | 1.26         |
| MLX       | MLX, MAX dimerization        | chr17q21.1           | energy reserve metabolic process          | ---                                    | -1.10         | -1.05           | -1.02     | -1.00       | -1.00     | -1.06       | 1.18       | 1.12         | 1.29       | 1.16         | 1.11       | 1.15         |
| MLXP      | MLX interacting protein      | chr12q24.31          | transcription, DNA-dependent              | ---                                    | -1.03         | -1.39           | -1.30     | -1.15       | 1.46      | 1.30        | 1.70       | -1.66        | 2.63       | 1.73         | 1.48       | 1.30         |
| MLXP      | MLX interacting protein      | chr12q24.31          | transcription, DNA-dependent              | ---                                    | -1.02         | -1.12           | 1.03      | 1.04        | 1.17      | 1.04        | 1.04       | 1.05         | -1.19      | -1.30        | -1.13      | -1.11        |
| MMAA      | methylmalonic aciduria (co)  | chr4q31.21           | fatty acid beta-oxidation                 | ---                                    | 1.01          | -1.05           | -1.06     | 1.07        | 1.03      | 1.12        | -1.07      | -1.01        | 1.36       | -1.08        | 1.48       | 1.59         |
| MMAA      | methylmalonic aciduria (co)  | chr4q31.21           | fatty acid beta-oxidation                 | ---                                    | 1.24          | 1.16            | -1.29     | -1.64       | 1.62      | 1.34        | -1.28      | 1.03         | 1.10       | 1.11         | 1.76       | 1.99         |
| MMAB      | methylmalonic aciduria (co)  | chr12q24             | vitamin metabolic process                 | ---                                    | -1.26         | -1.10           | -1.04     | 1.27        | -1.13     | -1.02       | -1.27      | -1.26        | -1.22      | -2.31        | 1.22       | 1.50         |
| MMAB      | methylmalonic aciduria (co)  | chr12q24             | vitamin metabolic process                 | ---                                    | -1.36         | -1.43           | -1.13     | -1.02       | -1.03     | -1.26       | -1.48      | -1.17        | -1.17      | -1.37        | 1.01       | 1.40         |
| MMAB      | methylmalonic aciduria (co)  | chr12q24             | vitamin metabolic process                 | ---                                    | -1.01         | -1.06           | 1.00      | 1.07        | 1.00      | -1.03       | 1.04       | 1.15         | 1.04       | -1.08        | 1.32       | 1.46         |
| MMACHC    | methylmalonic aciduria (co)  | chr1p34.1            | vitamin metabolic process                 | ---                                    | -1.04         | -1.11           | -1.15     | 1.02        | -1.06     | -1.10       | -1.08      | 1.10         | -1.45      | -1.50        | -1.21      | -1.13        |
| MMD       | monocyte to macrophage diffe | chr17q               | cytolysis                                 | ---                                    | -1.03         | 1.20            | -1.03     | -1.16       | 1.26      | 1.05        | -1.02      | -1.09        | -1.11      | -1.08        | -1.53      | -1.72        |
| MMEL1     | membrane metallo-endopept    | chr1p36              | proteolysis                               | ---                                    | -1.20         | -1.16           | 1.08      | 1.22        | -1.08     | -1.10       | -1.10      | -1.08        | -1.41      | -1.25        | -1.74      | -1.15        |
| MMGT1     | membrane magnesium tran      | chrXq26.3            | transport                                 | ---                                    | -1.06         | 1.05            | -1.04     | 1.02        | -1.04     | 1.02        | -1.02      | -1.00        | -1.13      | -1.09        | -1.12      | -1.14        |
| MMP1      | matrix metalloproteinase 1   | chr11q22.3           | proteolysis                               | Matrix_Metalloproteinases // GenMAPP   | 1.45          | 1.06            | -1.95     | -2.09       | -1.48     | -3.76       | -2.89      | -3.02        | 16.12      | 13.13        | 2.93       | 2.56         |
| MMP13     | matrix metalloproteinase 13  | chr11q22.3           | ossification                              | Matrix_Metalloproteinases // GenMAPP   | 3.31          | 2.37            | 1.83      | -1.25       | 1.42      | 2.29        | 1.03       | 1.14         | -1.66      | -1.44        | 1.59       | -1.24        |
| MMP15     | matrix metalloproteinase 15  | chr16q13             | cellular protein modification process     | Matrix_Metalloproteinases // GenMAPP   | -1.01         | -1.00           | -1.27     | -1.17       | 1.09      | 1.07        | -1.07      | -1.12        | 1.13       | 1.09         | 1.51       | 1.89         |
| MMP16     | matrix metalloproteinase 16  | chr8q21.3            | proteolysis                               | Matrix_Metalloproteinases // GenMAPP   | 1.39          | -1.38           | 1.75      | 2.86        | -1.36     | 1.57        | 1.14       | -1.01        | 2.00       | 1.33         | -1.01      | -1.12        |
| MMP19     | matrix metalloproteinase 19  | chr12q14             | angiogenesis                              | Matrix_Metalloproteinases // GenMAPP   | -1.12         | -1.19           | 1.09      | 1.19        | 1.11      | 1.12        | 1.03       | 1.04         | -1.83      | -2.05        | -1.57      | -1.41        |
| MMP24-AS1 | MMP24 antisense RNA 1        | chr20q11.22          | 0                                         | ---                                    | 1.02          | -1.12           | -1.06     | 1.08        | -1.03     | 1.00        | 1.12       | 1.15         | 1.35       | 1.41         | -1.13      | 1.16         |
| MMP24-AS1 | MMP24 antisense RNA 1        | chr20q11.22          | 0                                         | ---                                    | -1.14         | -1.16           | -1.01     | -1.00       | 1.19      | 1.05        | 1.04       | 1.04         | 1.07       | 1.11         | -1.61      | -1.20        |
| MMP24-AS1 | MMP24 antisense RNA 1        | chr20q11.22          | 0                                         | ---                                    | -1.09         | -1.08           | 1.03      | -1.12       | -1.06     | -1.14       | 1.13       | 1.08         | 1.57       | 1.57         | 1.11       | 1.19         |
| MMP27     | matrix metalloproteinase 27  | chr11q24             | proteolysis                               | Matrix_Metalloproteinases // GenMAPP   | -1.04         | -1.12           | 1.40      | 2.75        | -1.62     | -1.56       | 1.49       | -1.19        | 8.54       | 5.71         | 1.21       | 1.28         |
| MMP28     | matrix metalloproteinase 28  | chr17q21.1           | proteolysis                               | Matrix_Metalloproteinases // GenMAPP   | 1.08          | 1.73            | -1.26     | -1.34       | -2.39     | -1.06       | 1.48       | 1.38         | 1.08       | 1.12         | 1.14       | -1.21        |
| MMP28     | matrix metalloproteinase 28  | chr17q21.1           | proteolysis                               | Matrix_Metalloproteinases // GenMAPP   | -1.02         | -1.16           | -1.04     | -1.38       | -1.00     | 1.12        | 1.53       | -1.15        | 1.53       | 1.53         | -1.11      | -1.44        |
| MMP28     | matrix metalloproteinase 28  | chr17q21.1           | proteolysis                               | Matrix_Metalloproteinases // GenMAPP   | -1.01         | 1.18            | 1.01      | -1.10       | 1.51      | 1.15        | 1.66       | -1.08        | 1.59       | 1.12         | -1.01      | -1.40        |
| MMP28     | matrix metalloproteinase 28  | chr17q21.1           | proteolysis                               | Matrix_Metalloproteinases // GenMAPP   | 1.07          | -1.22           | -1.63     | -1.26       | 1.04      | -1.33       | -1.13      | 1.35         | 3.33       | 2.42         | 1.23       | 1.62         |
| MMP3      | matrix metalloproteinase 3   | chr11q22.3           | response to hypoxia                       | Matrix_Metalloproteinases // GenMAPP   | -1.13         | -1.02           | -1.12     | 1.43        | -1.51     | 1.24        | 1.06       | 1.42         | 2.93       | 3.58         | -1.15      | 1.02         |
| MMP8      | matrix metalloproteinase 8   | chr11q22.3           | ossification                              | Matrix_Metalloproteinases // GenMAPP   | -2.58         | -1.03           | 2.42      | 3.31        | -1.13     | 1.45        | 2.35       | -2.12        | 2.45       | 2.10         | 2.57       | 1.27         |
| MMP9      | matrix metalloproteinase 9   | chr20q11.2-q13.1     | skeletal system development               | Matrix_Metalloproteinases // GenMAPP   | 1.01          | -1.55           | -2.20     | -1.67       | 2.44      | 1.23        | -4.35      | 1.42         | 3.60       | 2.55         | -2.04      | -1.39        |
| MNI       | meningioma (disrupted in)    | chr22q12.1           | intramembranous ossification              | ---                                    | 1.07          | 1.21            | 1.17      | -1.04       | -1.06     | -1.06       | -1.03      | 1.06         | 1.06       | 1.26         | 1.68       | 1.45         |
| MNAT1     | menage a trois homolog 1,    | chr14q23             | regulation of cyclin-dependent protein se | G1_to_S_cell_cycle_Reactome // GenMAPP | 1.06          | 1.10            | 1.05      | -1.10       | -1.07     | -1.00       | 1.31       | 1.23         | 1.25       | 1.08         | 1.52       | 1.39         |
| MNS1      | meiosis-specific nuclear str | chr15q13.3           | meiosis                                   | ---                                    | 1.07          | -1.10           | -1.06     | 1.04        | 1.33      | 1.17        | -1.04      | 1.18         | -1.45      | -1.70        | -1.65      | -2.13        |
| MNT       | MNT, MAX dimerization        | chr17p13.3           | transcription, DNA-dependent              | ---                                    | -1.00         | -1.07           | -1.01     | 1.18        | -1.05     | 1.02        | 1.01       | 1.10         | 1.13       | 1.28         | 1.06       | 1.20         |
| MNX1      | motor neuron and pancreas    | chr7q36              | neuron migration                          | ---                                    | -1.15         | -1.13           | -1.25     | -1.57       | 1.04      | 1.35        | -1.09      | 1.33         | -1.13      | -1.14        | 1.33       | 1.10         |
| MOB1A     | MOB kinase activator 1A      | chr2p13.1            | hippo signaling cascade                   | ---                                    | 1.07          | 1.08            | 1.13      | 1.00        | -1.01     | 1.05        | -1.09      | -1.15        | -1.52      | -1.53        | 1.04       | -1.25        |
| MOB1A     | MOB kinase activator 1A      | chr2p13.1            | multicellular organismal development      | ---                                    | 1.07          | 1.05            | -1.03     | -1.19       | -1.12     | -1.06       | -1.38      | -1.15        | -1.65      | -1.36        | -1.48      | -1.66        |
| MOB2      | MOB kinase activator 2       | chr11p15.5           | phosphorylation                           | ---                                    | 1.07          | -1.15           | 1.14      | 1.10        | -1.00     | 1.01        | 1.00       | -1.18        | 1.27       | -1.04        | 1.76       | 1.57         |
| MOB3A     | MOB kinase activator 3A      | chr19p13.3           | 0                                         | ---                                    | -1.06         | -1.09           | 1.06      | 1.14        | 1.04      | -1.17       | 1.12       | 1.09         | -1.02      | 1.23         | 1.17       | 1.61         |
| MOB3B     | MOB kinase activator 3B      | chr9p21.2            | 0                                         | ---                                    | -1.00         | 1.02            | 1.07      | 1.06        | -1.10     | -1.11       | 1.33       | 1.22         | -1.85      | -1.99        | -1.60      | -1.76        |
| MOB3B     | MOB kinase activator 3B      | chr9p21.2            | 0                                         | ---                                    | 1.54          | 1.32            | -1.03     | -1.08       | -1.03     | 1.16        | -1.17      | 1.06         | -1.37      | -1.10        | -1.40      | -1.70        |
| MOB3C     | MOB kinase activator 3C      | chr1p33              | 0                                         | ---                                    | 1.03          | -1.06           | 1.01      | -1.07       | 1.05      | -1.03       | 1.12       | 1.04         | 1.70       | 1.40         | 1.21       | 1.57         |
| MOCOS     | molybdenum cofactor synth    | chr18q12             | vitamin metabolic process                 | ---                                    | 1.08          | 1.02            | -1.01     | 1.05        | -1.04     | -1.05       | 1.06       | 1.07         | 1.07       | 1.17         | 1.20       | 1.35         |
| MOC52     | molybdenum cofactor synth    | chr5q11              | vitamin metabolic process                 | ---                                    | 1.26          | 1.30            | 1.14      | 1.19        | -1.18     | -1.04       | -1.41      | -1.32        | -1.37      | -2.05        | -2.79      | -3.03        |
| MOGS      | mannosyl-oligosaccharide     | chr2p13.1            | protein folding                           | ---                                    | -1.11         | -1.15           | 1.02      | 1.15        | 1.09      | -1.05       | 1.18       | 1.22         | 1.33       | 1.05         | 1.44       | 1.46         |
| MOK       | MOK protein kinase           | chr14q32             | protein phosphorylation                   | ---                                    | -1.01         | -1.12           | 1.06      | 1.16        | 1.26      | 1.20        | -1.17      | 1.00         | -2.15      | -1.78        | -1.92      | -1.68        |
| MON1A     | MON1 homolog A (yeast)       | chr3p21.31           | transport                                 | ---                                    | -1.03         | 1.06            | -1.20     | -1.07       | 1.17      | 1.03        | -1.01      | 1.09         | 1.10       | -1.27        | 1.41       | 1.46         |
| MON1B     | MON1 homolog B (yeast)       | chr16q23.1           | 0                                         | ---                                    | -1.04         | -1.04           | 1.15      | 1.15        | 1.04      | 1.05        | -1.17      | -1.09        | -1.02      | 1.14         | 1.06       | 1.13         |
| MON1B     | MON1 homolog B (yeast)       | chr16q23.1           | 0                                         | ---                                    | -1.12         | -1.13           | 1.10      | 1.02        | 1.44      | 1.12        | -1.10      | -1.03        | 1.24       | 1.13         | 1.33       | 1.30         |
| MON1B     | MON1 homolog B (yeast)       | chr16q23.1           | 0                                         | ---                                    | -1.06         | -1.12           | 1.26      | 1.14        | 1.10      | -1.01       | 1.01       | -1.08        | 1.24       | 1.19         | 1.14       | 1.19         |
| MON2      | MON2 homolog (S. cerevis     | chr12q14.1           | transport                                 | ---                                    | -1.02         | -1.01           | 1.07      | 1.05        | 1.12      | 1.03        | 1.01       | -1.10        | -1.23      | 1.05         | -1.25      | -1.05        |
| MON2      | MON2 homolog (S. cerevis     | chr12q14.1           | transport                                 | ---                                    | 1.14          | 1.07            | -1.28     | 1.10        | 1.25      | 1.77        | 1.44       | -1.18        | -1.42      | -2.71        | 1.18       | 1.23         |
| MORC2     | MORC family CW-type zif      | chr22q12.2           | 0                                         | ---                                    | 1.01          | 1.13            | -1.00     | 1.00        | 1.34      | 1.27        | 1.11       | 1.02         | 1.05       | 1.16         | 1.23       | 1.60         |
| MORC2     | MORC family CW-type zif      | chr22q12.2           | 0                                         | ---                                    | -1.01         | -1.10           | -1.01     | 1.04        | 1.22      | 1.21        | -1.16      | 1.17         | 1.10       | 1.09         | 1.26       | 1.45         |
| MORC2-AS1 | MORC2 antisense RNA 1        | chr22q12.2           | 0                                         | ---                                    | -1.06         | 1.02            | 1.03      | -1.04       | -1.10     | -1.13       | 1.05       | 1.19         | -2.03      | -2.21        | -1.72      | -1.74        |
| MORC2-AS1 | MORC2 antisense RNA 1        | chr22q12.2           | 0                                         | ---                                    | 1.23          | 1.19            | -1.02     | 1.11        | 1.09      | -1.04       | -1.03      | 1.03         | -1.81      | -1.79        | -1.75      | -1.78        |
| MORC4     | MORC family CW-type zif      | chrXq22.3            | 0                                         | ---                                    | 1.14          | 1.13            | 1.15      | 1.04        | -1.06     | 1.13        | 1.01       | 1.00         | -1.37      | -1.29        | -1.55      | -1.56        |
| MORF4L1   | mortality factor 4 like 1    | chr15q24             | double-strand break repair via homolog    | ---                                    | 1.14          | 1.13            | -1.04     | -1.05       | 1.08      | 1.14        | -1.10      | 1.08         | -1.05      | 1.20         | 1.26       | 1.05         |
| MORF4L1   | mortality factor 4 like 1    | chr15q24             | double-strand break repair via homolog    | ---                                    | 1.16          | 1.10            | -1.10     | -1.01       | -1.08     | -1.01       | -1.05      | -1.02        | -1.01      | -1.01        | 1.26       | 1.21         |
| MORN2     | MORN repeat containing 2     | chr2p22.1            | 0                                         | ---                                    | 1.03          | 1.03            | -1.03     | 1.03        | 1.10      | 1.13        | -1.12      | -1.15        | -1.11      | -1.02        | -1.53      | -1.41        |
| MORN4     | MORN repeat containing 4     | chr10q24.2           | 0                                         | ---                                    | -1.16         | -1.12           | -1.23     | 1.05        | 1.16      | 1.27        | 1.05       | 1.35         | 1.79       | 1.58         | 1.01       | 1.40         |
| MORN4     | MORN repeat containing 4     | chr10q24.2           | 0                                         | ---                                    | -1.03         | -1.10           | -1.07     | -1.10       | 1.17      | 1.09        | -1.11      | -1.02        | -1.58      | -1.40        | -1.34      | -1.29        |
| MOSPD1    | motile sperm domain conta    | chrXq26.3            | negative regulation of transcription from | ---                                    | -1.22         | -1.26           | 1.28      | 1.08        | 1.00      | -1.08       | -1.11      | -1.00        | 1.39       | 1.21         | 1.83       | 1.23         |
| MOSPD2    | motile sperm domain conta    | chrXp22.2            | 0                                         | ---                                    | 1.19          | 1.17            | -1.04     | -1.02       | -1.08     | -1.00       | -1.04      | -1.09        | 1.47       | 1.41         | 1.36       | 1.21         |
| MOV10     | Mov10, Moloney leukemia      | chr1p13.2            | transcription, DNA-dependent              | ---                                    | -1.18         | -1.20           | 1.06      | 1.08        | 1.04      | -1.01       | 1.11       | 1.08         | -1.09      | -1.03        | -1.65      | -1.29        |
| MOXD1     | monoxygenase, DBH-like       | chr6q23.2            | catecholamine metabolic process           | ---                                    | 3.28          | 3.64            | -1.23     | 1.49        | -1.66     | 1.02        | -1.19      | 1.51         | 1.17       | -1.43        | 1.02       | 1.03         |
| MOXD1     | monoxygenase, DBH-like       | chr6q23.2            | catecholamine metabolic process           | ---                                    | 1.10          | -1.17           | 1.66      | 1.29        | 1.05      | 1.16        | -1.25      | -1.57        | -1.59      | -1.89        | -3.39      | -2.24        |

| ID        | Gene Title                                               | Chromosomal Location | 1st Gene Ontology Biological Process                | Pathway                       | A2497 30 mins | A2497P' 30 mins | A2497 2 h | A2497P' 2 h | A2497 4 h | A2497P' 4 h | A2497 24 h | A2497P' 24 h | A2497 48 h | A2497P' 48 h | A2497 72 h | A2497P' 72 h |
|-----------|----------------------------------------------------------|----------------------|-----------------------------------------------------|-------------------------------|---------------|-----------------|-----------|-------------|-----------|-------------|------------|--------------|------------|--------------|------------|--------------|
| MPC1      | mitochondrial pyruvate carboxylase                       | chr6q27              | pyruvate metabolic process                          | ---                           | 1.16          | 1.18            | -1.01     | -1.02       | 1.04      | 1.03        | -1.15      | 1.01         | -1.25      | -1.17        | -1.03      | -1.05        |
| MPC2      | mitochondrial pyruvate carboxylase                       | chr1q24              | pyruvate metabolic process                          | ---                           | -1.00         | 1.02            | 1.02      | -1.11       | -1.06     | -1.09       | -1.02      | -1.08        | -1.04      | 1.23         | 1.20       | 1.37         |
| MPDZ      | multiple PDZ domain protein                              | chr9p23              | cell adhesion                                       | ---                           | 1.02          | -1.10           | -1.08     | 1.06        | 1.04      | 1.19        | 1.01       | -1.06        | -1.46      | -1.22        | -1.70      | -1.50        |
| MPG       | N-methylpurine-DNA glycosylase                           | chr16p13.3           | DNA repair                                          | ---                           | -1.08         | -1.23           | -1.05     | 1.12        | 1.05      | -1.01       | 1.22       | 1.03         | 1.54       | 1.42         | 1.25       | 1.35         |
| MPHOSPH10 | M-phase phosphoprotein 10                                | chr2p13.3            | RNA splicing, via transesterification reaction      | ---                           | -1.05         | 1.02            | 1.05      | -1.07       | 1.02      | -1.11       | 1.05       | 1.04         | 1.09       | -1.08        | 1.33       | 1.30         |
| MPHOSPH6  | M-phase phosphoprotein 6                                 | chr16q23.3           | M phase of mitotic cell cycle                       | ---                           | -1.48         | -1.35           | 1.00      | 1.15        | 1.06      | -1.27       | 1.16       | 1.51         | 2.65       | 1.61         | 1.10       | 1.37         |
| MPHOSPH8  | M-phase phosphoprotein 8                                 | chr13q12.11          | transcription, DNA-dependent                        | ---                           | -1.01         | -1.05           | 1.10      | 1.14        | 1.08      | -1.05       | 1.17       | 1.22         | -1.00      | -1.38        | -1.22      | -1.09        |
| MPHOSPH8  | M-phase phosphoprotein 8                                 | chr13q12.11          | transcription, DNA-dependent                        | ---                           | 1.26          | 1.15            | 1.09      | 1.09        | 1.00      | 1.12        | -1.08      | -1.20        | -2.20      | -2.32        | -1.52      | -1.65        |
| MPHOSPH8  | M-phase phosphoprotein 8                                 | chr13q12.11          | transcription, DNA-dependent                        | ---                           | -1.13         | -1.06           | 1.10      | -1.01       | 1.11      | 1.11        | -1.16      | -1.07        | -2.36      | -2.14        | -1.74      | -1.75        |
| MPHOSPH9  | M-phase phosphoprotein 9                                 | chr12q24.31          | M phase of mitotic cell cycle                       | ---                           | 1.03          | -1.03           | -1.01     | -1.09       | 1.12      | 1.20        | -1.42      | -1.34        | -1.47      | -1.24        | -1.28      | -1.17        |
| MPHOSPH9  | M-phase phosphoprotein 9                                 | chr12q24.31          | M phase of mitotic cell cycle                       | ---                           | 1.22          | 1.13            | 1.02      | 1.02        | -1.30     | -1.15       | -1.07      | 1.24         | -1.45      | -1.52        | 1.00       | -1.10        |
| MPI       | mammalian phosphatase isomerase                          | chr15q22-qter        | carbohydrate metabolic process                      | ---                           | -1.29         | -1.15           | 1.19      | 1.10        | 1.25      | 1.15        | 1.27       | 1.26         | -2.09      | -1.47        | -1.42      | -1.17        |
| MPL       | myeloproliferative leukemia protein                      | chr1p34              | cell surface receptor signaling pathway             | Cell_cycle_KEGG // GenMAPP    | 1.21          | 1.25            | 1.26      | 1.11        | 1.49      | 1.59        | -1.33      | -1.27        | -4.65      | -2.28        | -1.41      | 1.07         |
| MPP4      | membrane protein, palmitoylated                          | chr2q33.2            | protein localization to synapse                     | ---                           | 3.90          | 2.32            | -1.44     | -1.66       | 2.86      | 5.94        | 1.34       | -1.15        | 2.30       | 2.15         | -1.41      | -1.46        |
| MPPE2D    | metallophosphoesterase domain containing 2               | chr11p13             | nervous system development                          | ---                           | 1.12          | 1.07            | -1.07     | -1.04       | -1.22     | -1.15       | -1.71      | -1.33        | -6.58      | -9.16        | -13.07     | -4.83        |
| MRP1      | myosin phosphatase Rho interacting                       | chr17p11.2           | 0                                                   | ---                           | 1.20          | 1.32            | -1.31     | -1.12       | 1.02      | 1.02        | -1.30      | 1.29         | 1.74       | 1.54         | 3.00       | 1.97         |
| MPV17     | MpV17 mitochondrial inner membrane protein               | chr2q23.3            | mitochondrial genome maintenance                    | ---                           | -1.08         | -1.02           | -1.01     | 1.01        | 1.01      | 1.06        | 1.14       | 1.07         | 1.09       | 1.20         | -1.24      | -1.07        |
| MPV17L    | MPV17 mitochondrial inner membrane protein               | chr16p13.11          | negative regulation of hydrogen peroxide production | ---                           | -1.05         | 1.05            | 1.06      | -1.15       | 1.31      | 1.17        | 1.17       | 1.11         | -1.42      | -1.36        | -1.58      | -1.86        |
| MPV17L2   | MPV17 mitochondrial inner membrane protein               | chr19p13.11          | 0                                                   | ---                           | -1.02         | -1.16           | 1.12      | 1.17        | -1.01     | -1.12       | -1.14      | -1.09        | 1.42       | 1.04         | 1.44       | 1.31         |
| MPZL1     | myelin protein zero-like 1                               | chr1q24.2            | transmembrane receptor protein tyrosine kinase      | ---                           | -1.79         | 1.02            | 1.35      | -1.15       | -1.06     | 1.20        | 1.31       | 1.39         | 1.76       | 1.58         | 1.39       | 1.70         |
| MPZL1     | myelin protein zero-like 1                               | chr1q24.2            | transmembrane receptor protein tyrosine kinase      | ---                           | -1.04         | -1.16           | 1.05      | 1.11        | 1.12      | -1.04       | 1.31       | 1.11         | 1.19       | 1.11         | 1.18       | 1.27         |
| MPZL1     | myelin protein zero-like 1                               | chr1q24.2            | transmembrane receptor protein tyrosine kinase      | ---                           | 1.20          | 1.01            | 1.02      | 1.05        | 1.22      | 1.09        | 1.28       | 1.34         | 2.00       | 1.60         | 1.42       | 1.51         |
| MPZL2     | myelin protein zero-like 2                               | chr1q24              | cell adhesion                                       | ---                           | 1.19          | -1.07           | 1.05      | 1.02        | -1.02     | 1.16        | -1.13      | -1.04        | 1.94       | 2.09         | 1.64       | 1.49         |
| MPZL2     | myelin protein zero-like 2                               | chr1q24              | cell adhesion                                       | ---                           | -1.13         | -1.29           | -1.07     | -1.00       | 1.26      | 1.31        | -1.10      | -1.20        | 1.43       | 1.35         | 2.57       | 3.19         |
| MPZL2     | myelin protein zero-like 2                               | chr1q24              | cell adhesion                                       | ---                           | 1.02          | -1.00           | 1.18      | 1.13        | -1.01     | -1.04       | 1.33       | 1.08         | 3.38       | 3.03         | 5.09       | 5.35         |
| MPZL3     | myelin protein zero-like 3                               | chr1q23.3            | cell adhesion                                       | ---                           | -1.08         | -1.05           | 1.09      | 1.06        | -1.00     | 1.06        | -1.02      | -1.05        | 1.60       | 1.44         | 1.56       | 1.74         |
| MR1       | major histocompatibility complex class I related protein | chr1q25.3            | positive regulation of T cell mediated cytotoxicity | ---                           | 1.06          | 1.04            | 1.00      | 1.12        | 1.14      | -1.01       | -1.08      | -1.12        | 1.03       | 1.24         | -1.10      | 1.02         |
| MR1       | major histocompatibility complex class I related protein | chr1q25.3            | positive regulation of T cell mediated cytotoxicity | ---                           | 1.14          | -1.02           | 1.12      | 1.22        | 1.09      | 1.01        | -1.04      | 1.06         | -1.43      | -1.22        | -1.79      | -1.37        |
| MRAP      | melanocortin 2 receptor accessory protein                | chr21q22.1           | positive regulation of cAMP biosynthesis            | ---                           | -1.12         | -1.18           | -1.01     | 1.02        | 1.01      | 1.12        | 1.04       | 1.06         | -1.17      | -1.06        | 1.10       | 1.28         |
| MRAP2     | melanocortin 2 receptor accessory protein                | chr6q14.2            | energy reserve metabolic process                    | ---                           | -1.16         | 1.02            | 3.74      | 4.13        | -1.24     | 1.13        | -1.73      | -1.30        | -1.72      | -2.17        | -2.50      | -3.81        |
| MRAS      | muscle RAS oncogene homologue                            | chr3q22.3            | GTP catabolic process                               | ---                           | -1.02         | -1.21           | -1.03     | -1.24       | -1.03     | -1.10       | -1.33      | -1.31        | -1.62      | -1.77        | -1.03      | -1.39        |
| MRE11A    | MRE11 meiotic recombination protein                      | chr11q21             | regulation of mitotic recombination                 | ---                           | 1.04          | -1.05           | -1.06     | -1.07       | -1.05     | -1.13       | 1.26       | 1.14         | -1.38      | -1.61        | 1.07       | -1.13        |
| MRE11A    | MRE11 meiotic recombination protein                      | chr11q21             | regulation of mitotic recombination                 | ---                           | -1.17         | -1.13           | -1.20     | -1.48       | 1.18      | 1.11        | -1.59      | -1.40        | -3.21      | -2.59        | -2.48      | -2.48        |
| MRFAP1L1  | Morf4 family associated protein                          | chr4p16.1            | 0                                                   | ---                           | -1.04         | -1.01           | -1.08     | -1.07       | -1.06     | 1.02        | -1.06      | -1.06        | -1.20      | -1.18        | -1.20      | -1.15        |
| MRGBP     | MRG/MORF4L binding protein                               | chr20q13.33          | transcription, DNA-dependent                        | ---                           | -1.04         | -1.04           | 1.00      | 1.11        | -1.06     | 1.04        | 1.21       | 1.13         | 1.36       | 1.39         | 1.33       | 1.35         |
| MRGPRX1   | MAS-related GPR, member 1                                | chr11p15.111         | acute-phase response                                | ---                           | 1.61          | 1.67            | 1.47      | 1.64        | 1.35      | -1.41       | 1.67       | 1.24         | 1.52       | 1.36         | -2.07      | -1.38        |
| MR1       | methylthioribose-1-phosphate isomerase                   | chr19p13.2           | sulfur amino acid metabolic process                 | ---                           | 1.09          | 1.11            | -1.03     | -1.01       | 1.04      | 1.06        | -1.11      | -1.05        | -1.33      | -1.38        | -1.06      | -1.29        |
| MRM1      | mitochondrial rRNA methyltransferase                     | chr17q12             | RNA methylation                                     | ---                           | -1.06         | -1.30           | -1.03     | 1.01        | 1.06      | -1.02       | 1.01       | 1.10         | 1.12       | -1.24        | 1.13       | 1.47         |
| MROH2A    | maestro heat-like repeat family                          | chr2q37.1            | 0                                                   | ---                           | -1.21         | -1.52           | -1.11     | 1.20        | 1.57      | 1.09        | -1.16      | -1.68        | 2.10       | 2.43         | 1.34       | 1.71         |
| MROH2A    | maestro heat-like repeat family                          | chr2q37.1            | 0                                                   | ---                           | -1.20         | -1.24           | -1.30     | -1.22       | -1.50     | -1.22       | 1.09       | -1.18        | 1.86       | 2.55         | 2.20       | 2.24         |
| MROH2B    | maestro heat-like repeat family                          | chr5p13.1            | 0                                                   | ---                           | -1.55         | -1.76           | -1.49     | 1.19        | 1.32      | -1.05       | 1.58       | 1.51         | 1.81       | 1.05         | -1.23      | -1.41        |
| MROH9     | maestro heat-like repeat family                          | chr1q24.3            | 0                                                   | ---                           | 2.20          | 1.64            | -7.08     | 1.41        | 1.84      | 1.02        | 1.59       | 1.12         | 7.30       | 6.82         | -1.88      | -1.40        |
| MRP63     | mitochondrial ribosomal protein                          | chr13q12.11          | translation                                         | ---                           | -1.18         | -1.13           | -1.25     | -1.00       | -1.21     | -1.17       | 1.01       | 1.24         | -1.19      | -1.15        | -1.20      | -1.15        |
| MRPL1     | mitochondrial ribosomal protein                          | chr4q21.1            | translation                                         | ---                           | 1.07          | 1.14            | 1.02      | -1.05       | 1.05      | -1.10       | 1.09       | -1.00        | -1.35      | -1.52        | -1.42      | -1.61        |
| MRPL10    | mitochondrial ribosomal protein                          | chr17q21.32          | translation                                         | ---                           | -1.14         | -1.09           | 1.04      | 1.01        | 1.03      | 1.03        | 1.19       | 1.17         | 1.21       | 1.19         | 1.15       | 1.28         |
| MRPL11    | mitochondrial ribosomal protein                          | chr11q13.3           | translation                                         | ---                           | 1.00          | -1.01           | 1.02      | -1.06       | 1.00      | -1.12       | 1.08       | -1.07        | -1.00      | -1.07        | -1.19      | -1.31        |
| MRPL14    | mitochondrial ribosomal protein                          | chr6p21.3            | translation                                         | ---                           | -1.13         | -1.16           | 1.03      | 1.13        | 1.15      | -1.05       | 1.21       | 1.12         | 1.53       | 1.21         | 1.38       | 1.41         |
| MRPL15    | mitochondrial ribosomal protein                          | chr8q11.2-q13        | translation                                         | ---                           | -1.04         | -1.01           | -1.02     | -1.04       | 1.02      | 1.01        | -1.21      | -1.17        | -1.57      | -1.52        | -1.28      | -1.28        |
| MRPL16    | mitochondrial ribosomal protein                          | chr11q12.1           | translation                                         | ---                           | -1.05         | -1.01           | 1.03      | -1.12       | 1.08      | -1.04       | 1.20       | -1.04        | 1.02       | -1.14        | -1.21      | -1.14        |
| MRPL17    | mitochondrial ribosomal protein                          | chr11p15.5-p15.4     | translation                                         | ---                           | -1.13         | -1.07           | 1.01      | 1.04        | 1.01      | -1.12       | 1.24       | 1.15         | 1.53       | 1.50         | 1.17       | 1.37         |
| MRPL18    | mitochondrial ribosomal protein                          | chr6q25.3            | translation                                         | ---                           | -1.12         | -1.02           | -1.02     | -1.08       | 1.09      | -1.06       | -1.03      | 1.00         | 1.32       | 1.22         | 1.25       | 1.33         |
| MRPL19    | mitochondrial ribosomal protein                          | chr2p11.1-q11.2      | translation                                         | Ribosomal_Proteins // GenMAPP | 1.11          | 1.14            | 1.17      | -1.06       | -1.01     | 1.03        | 1.09       | 1.39         | 1.17       | 1.16         | -1.02      | -1.02        |
| MRPL19    | mitochondrial ribosomal protein                          | chr2p11.1-q11.2      | translation                                         | Ribosomal_Proteins // GenMAPP | -1.06         | 1.03            | 1.07      | -1.12       | -1.48     | 1.05        | -1.76      | -1.25        | -1.01      | 1.26         | -1.81      | -1.73        |
| MRPL2     | mitochondrial ribosomal protein                          | chr6p21.3            | translation                                         | ---                           | -1.03         | -1.11           | 1.02      | 1.07        | -1.05     | 1.04        | 1.09       | 1.04         | 1.18       | 1.17         | 1.04       | 1.11         |
| MRPL2     | mitochondrial ribosomal protein                          | chr6p21.3            | translation                                         | ---                           | -1.01         | -1.04           | -1.02     | 1.04        | -1.06     | -1.14       | 1.18       | 1.11         | 1.52       | 1.33         | 1.36       | 1.48         |
| MRPL20    | mitochondrial ribosomal protein                          | chr1p36.3-p36.2      | translation                                         | ---                           | -1.50         | -1.41           | 1.08      | -1.09       | 1.26      | 1.20        | -1.51      | -1.03        | -1.20      | -1.16        | -1.23      | -1.28        |
| MRPL20    | mitochondrial ribosomal protein                          | chr1p36.3-p36.2      | translation                                         | ---                           | -1.10         | -1.09           | -1.03     | -1.06       | 1.06      | -1.00       | -1.06      | 1.06         | -1.05      | -1.11        | -1.23      | -1.33        |
| MRPL22    | mitochondrial ribosomal protein                          | chr5q33.2            | translation                                         | ---                           | -1.08         | -1.08           | -1.05     | 1.01        | -1.04     | -1.03       | 1.06       | 1.10         | 1.29       | 1.19         | 1.15       | 1.31         |
| MRPL23    | mitochondrial ribosomal protein                          | chr11p15.5           | translation                                         | ---                           | -1.02         | 1.00            | 1.03      | -1.03       | 1.11      | -1.01       | 1.09       | -1.02        | -1.10      | -1.08        | -1.40      | -1.42        |
| MRPL27    | mitochondrial ribosomal protein                          | chr17q21.3-q22       | translation                                         | ---                           | -1.10         | -1.09           | -1.04     | 1.06        | 1.01      | -1.05       | 1.03       | 1.03         | 1.28       | 1.20         | 1.14       | 1.27         |
| MRPL30    | mitochondrial ribosomal protein                          | chr2q11.2            | 0                                                   | ---                           | 1.04          | 1.13            | -1.05     | -1.18       | -1.00     | 1.08        | -1.33      | -1.12        | -1.42      | -1.39        | -1.89      | -1.67        |
| MRPL30    | mitochondrial ribosomal protein                          | chr2q11.2            | 0                                                   | ---                           | -1.06         | -1.06           | 1.00      | 1.04        | -1.02     | -1.00       | -1.04      | 1.07         | 1.32       | 1.29         | 1.28       | 1.30         |
| MRPL30    | mitochondrial ribosomal protein                          | chr2q11.2            | 0                                                   | ---                           | 1.15          | 1.12            | 1.07      | -1.11       | 1.07      | 1.20        | -1.05      | -1.02        | -1.53      | -1.30        | -1.81      | -1.75        |
| MRPL35    | mitochondrial ribosomal protein                          | chr2p11.2            | translation                                         | ---                           | -1.03         | 1.07            | -1.11     | -1.03       | 1.06      | 1.01        | 1.04       | -1.08        | 1.42       | 1.37         | 1.71       | 1.66         |
| MRPL35    | mitochondrial ribosomal protein                          | chr2p11.2            | translation                                         | ---                           | 1.05          | 1.10            | 1.09      | 1.06        | 1.09      | 1.01        | 1.20       | 1.13         | -1.11      | -1.14        | -1.04      | -1.05        |
| MRPL38    | mitochondrial ribosomal protein                          | chr17q25.3           | cell projection organization                        | ---                           | -1.13         | -1.15           | -1.01     | -1.01       | 1.03      | -1.11       | 1.07       | 1.10         | 1.12       | 1.03         | 1.15       | 1.26         |

| ID             | Gene Title                              | Chromosomal Location | 1st Gene Ontology Biological Process          | Pathway | A2497 30 mins | A2497P' 30 mins | A2497 2 h | A2497P' 2 h | A2497 4 h | A2497P' 4 h | A2497 24 h | A2497P' 24 h | A2497 48 h | A2497P' 48 h | A2497 72 h | A2497P' 72 h |
|----------------|-----------------------------------------|----------------------|-----------------------------------------------|---------|---------------|-----------------|-----------|-------------|-----------|-------------|------------|--------------|------------|--------------|------------|--------------|
| MRPL39         | mitochondrial ribosomal protein         | chr21q21.3           | 0                                             | ---     | 1.08          | 1.03            | -1.07     | -1.06       | -1.01     | -1.02       | 1.04       | -1.03        | 1.32       | 1.20         | 1.21       | 1.23         |
| MRPL4          | mitochondrial ribosomal protein         | chr19p13.2           | translation                                   | ---     | -1.22         | -1.16           | 1.15      | 1.41        | -1.09     | -1.38       | 1.23       | 1.33         | 1.32       | 1.06         | -1.75      | -1.74        |
| MRPL4          | mitochondrial ribosomal protein         | chr19p13.2           | translation                                   | ---     | 1.10          | -1.05           | -1.14     | -1.12       | -1.03     | 1.04        | 1.23       | 1.06         | 1.18       | 1.10         | 1.04       | 1.04         |
| MRPL4          | mitochondrial ribosomal protein         | chr19p13.2           | translation                                   | ---     | -1.01         | -1.02           | 1.01      | -1.12       | 1.00      | -1.06       | 1.10       | 1.02         | 1.41       | 1.18         | 1.19       | 1.17         |
| MRPL41         | mitochondrial ribosomal protein         | chr9q34.3            | translation                                   | ---     | -1.07         | -1.11           | -1.05     | -1.03       | 1.07      | -1.02       | 1.06       | 1.02         | 1.32       | 1.18         | 1.27       | 1.37         |
| MRPL41         | mitochondrial ribosomal protein         | chr9q34.3            | translation                                   | ---     | -1.15         | -1.17           | -1.08     | -1.07       | 1.14      | -1.03       | 1.11       | -1.02        | 1.45       | 1.21         | 1.31       | 1.38         |
| MRPL41         | mitochondrial ribosomal protein         | chr9q34.3            | translation                                   | ---     | -1.09         | -1.13           | -1.10     | -1.34       | 1.04      | 1.05        | -1.14      | -1.25        | 1.10       | -1.02        | 1.29       | 1.34         |
| MRPL41         | mitochondrial ribosomal protein         | chr9q34.3            | translation                                   | ---     | -1.12         | -1.15           | -1.05     | -1.06       | 1.09      | 1.00        | 1.13       | 1.07         | 1.39       | 1.28         | 1.26       | 1.34         |
| MRPL41         | mitochondrial ribosomal protein         | chr9q34.3            | translation                                   | ---     | -1.03         | -1.07           | -1.06     | -1.09       | 1.03      | -1.03       | 1.07       | 1.19         | 1.20       | 1.12         | 1.31       | 1.38         |
| MRPL42         | mitochondrial ribosomal protein         | chr12q22             | translation                                   | ---     | -1.01         | -1.03           | 1.01      | 1.00        | -1.04     | -1.03       | 1.13       | 1.04         | 1.61       | 1.59         | 1.76       | 1.73         |
| MRPL43         | mitochondrial ribosomal protein         | chr10q24.31          | translation                                   | ---     | -1.10         | -1.07           | -1.05     | 1.13        | -1.09     | -1.07       | 1.03       | 1.04         | -1.44      | -1.29        | -2.47      | -2.16        |
| MRPL43         | mitochondrial ribosomal protein         | chr10q24.31          | translation                                   | ---     | -1.00         | -1.02           | -1.01     | 1.08        | 1.04      | -1.05       | 1.32       | 1.10         | 1.36       | 1.38         | 1.34       | 1.29         |
| MRPL43         | mitochondrial ribosomal protein         | chr10q24.31          | translation                                   | ---     | -1.05         | -1.10           | 1.08      | 1.07        | 1.07      | -1.04       | 1.21       | 1.09         | -1.04      | -1.03        | -1.29      | -1.29        |
| MRPL44         | mitochondrial ribosomal protein         | chr2q36.1            | RNA processing                                | ---     | -1.02         | 1.02            | 1.03      | 1.01        | -1.03     | -1.06       | 1.19       | -1.03        | 1.30       | 1.16         | 1.52       | 1.37         |
| MRPL45P2       | mitochondrial ribosomal protein         | chr17q21.32          | 0                                             | ---     | -1.05         | -1.34           | 1.31      | -1.11       | -1.31     | -1.24       | 1.02       | -1.09        | -1.08      | -1.15        | 1.61       | -1.11        |
| MRPL47         | mitochondrial ribosomal protein         | chr3q26.33           | translation                                   | ---     | -1.05         | 1.04            | -1.02     | -1.08       | 1.01      | -1.08       | 1.07       | 1.01         | 1.18       | -1.02        | 1.18       | 1.09         |
| MRPL49         | mitochondrial ribosomal protein         | chr11q13             | translation                                   | ---     | -1.04         | -1.01           | -1.05     | -1.07       | 1.01      | 1.01        | 1.03       | -1.05        | 1.10       | 1.09         | 1.23       | 1.17         |
| MRPL50         | mitochondrial ribosomal protein         | chr9q31.1            | 0                                             | ---     | 1.16          | 1.11            | -1.05     | -1.23       | -1.21     | 1.05        | -1.26      | -1.24        | 1.21       | 1.44         | 1.48       | 1.27         |
| MRPL50         | mitochondrial ribosomal protein         | chr9q31.1            | 0                                             | ---     | -1.12         | 1.03            | -1.15     | -1.04       | -1.26     | 1.01        | -1.04      | -1.02        | 1.13       | 1.26         | 1.13       | 1.15         |
| MRPL50         | mitochondrial ribosomal protein         | chr9q31.1            | 0                                             | ---     | 1.28          | 1.32            | 1.29      | 1.38        | -1.02     | 1.14        | 1.13       | 1.05         | -1.58      | -1.24        | -1.30      | -1.53        |
| MRPL54         | mitochondrial ribosomal protein         | chr19p13.3           | 0                                             | ---     | 1.04          | 1.01            | -1.02     | -1.08       | 1.06      | -1.03       | 1.16       | 1.07         | 1.58       | 1.31         | 1.33       | 1.31         |
| MRPL55         | mitochondrial ribosomal protein         | chr14q2.13           | translation                                   | ---     | 1.08          | 1.09            | -1.04     | -1.07       | -1.07     | -1.10       | -1.00      | -1.06        | -1.27      | -1.39        | -1.12      | -1.24        |
| MRPS10         | mitochondrial ribosomal protein         | chr6p21.1            | translation                                   | ---     | 1.05          | 1.11            | -1.05     | -1.11       | -1.03     | 1.06        | 1.08       | 1.17         | 1.14       | 1.11         | -1.03      | -1.09        |
| MRPS10         | mitochondrial ribosomal protein         | chr6p21.1            | translation                                   | ---     | 1.02          | -1.06           | -1.00     | -1.10       | -1.04     | 1.01        | 1.20       | 1.25         | 1.20       | 1.06         | -1.02      | -1.10        |
| MRPS12         | mitochondrial ribosomal protein         | chr19q13.1-q13.2     | translation                                   | ---     | -1.05         | -1.21           | -1.17     | -1.24       | 1.18      | 1.02        | -1.18      | -1.30        | -1.65      | -1.43        | 1.01       | 1.02         |
| MRPS14         | mitochondrial ribosomal protein         | chr1q25.1            | translation                                   | ---     | -1.05         | -1.06           | -1.01     | 1.09        | 1.07      | -1.03       | -1.03      | 1.00         | -2.23      | -1.77        | -2.64      | -2.69        |
| MRPS14         | mitochondrial ribosomal protein         | chr1q25.1            | translation                                   | ---     | -1.06         | -1.04           | -1.06     | -1.05       | 1.05      | 1.01        | 1.10       | 1.10         | -1.01      | 1.08         | 1.16       | 1.15         |
| MRPS15         | mitochondrial ribosomal protein         | chr1p34.3            | translation                                   | ---     | 1.11          | -1.04           | 1.05      | 1.23        | -1.12     | -1.05       | -1.00      | 1.07         | 1.38       | 1.18         | 1.22       | 1.35         |
| MRPS16         | mitochondrial ribosomal protein         | chr10q22.1           | translation                                   | ---     | -1.02         | 1.15            | 1.08      | 1.01        | 1.07      | 1.02        | -1.00      | 1.11         | -2.36      | -2.30        | -2.69      | -4.09        |
| MRPS17         | mitochondrial ribosomal protein         | chr7p11              | regulation of transcription, DNA-dependent    | ---     | 1.05          | 1.02            | -1.06     | -1.06       | 1.10      | 1.09        | -1.01      | 1.15         | 1.12       | 1.02         | 1.39       | 1.27         |
| MRPS18B        | mitochondrial ribosomal protein         | chr6p21.3            | translation                                   | ---     | -1.15         | -1.12           | -1.02     | -1.04       | 1.10      | 1.01        | 1.07       | -1.01        | 1.21       | 1.16         | 1.50       | 1.61         |
| MRPS18C        | mitochondrial ribosomal protein         | chr4q21.23           | translation                                   | ---     | 1.12          | 1.10            | 1.15      | 1.07        | -1.07     | -1.00       | -1.05      | -1.03        | -2.00      | -1.53        | -2.13      | -2.11        |
| MRPS18C        | mitochondrial ribosomal protein         | chr4q21.23           | translation                                   | ---     | 1.15          | 1.07            | 1.04      | 1.10        | 1.11      | 1.08        | 1.04       | 1.08         | 1.04       | 1.08         | 1.14       | 1.05         |
| MRPS2          | mitochondrial ribosomal protein         | chr9q34              | translation                                   | ---     | 1.01          | -1.07           | 1.05      | 1.09        | 1.03      | -1.01       | 1.10       | 1.04         | 1.19       | 1.03         | 1.21       | 1.16         |
| MRPS22         | mitochondrial ribosomal protein         | chr3q23              | 0                                             | ---     | -1.09         | -1.02           | 1.07      | 1.03        | 1.11      | -1.08       | 1.21       | 1.06         | 1.36       | 1.12         | 1.18       | 1.19         |
| MRPS22         | mitochondrial ribosomal protein         | chr3q23              | 0                                             | ---     | -1.11         | -1.06           | -1.03     | -1.01       | 1.08      | -1.06       | 1.23       | 1.04         | 1.25       | 1.02         | 1.14       | 1.23         |
| MRPS22         | mitochondrial ribosomal protein         | chr3q23              | 0                                             | ---     | -1.06         | -1.03           | 1.03      | 1.03        | 1.07      | -1.09       | 1.13       | 1.02         | 1.30       | 1.06         | 1.26       | 1.23         |
| MRPS22         | mitochondrial ribosomal protein         | chr3q23              | 0                                             | ---     | -1.05         | -1.04           | 1.10      | 1.04        | -1.03     | -1.08       | 1.11       | -1.07        | 1.28       | 1.10         | 1.28       | 1.21         |
| MRPS23         | mitochondrial ribosomal protein         | chr17q22-q23         | translation                                   | ---     | -1.14         | -1.07           | -1.03     | -1.07       | 1.08      | 1.03        | 1.07       | 1.01         | 1.23       | 1.10         | 1.20       | 1.13         |
| MRPS24 /// U   | mitochondrial ribosomal protein         | chr7p13 /// chr7p14  | translation                                   | ---     | -1.09         | -1.07           | -1.05     | 1.04        | 1.18      | 1.07        | -1.01      | -1.01        | 1.24       | 1.14         | 1.14       | 1.17         |
| MRPS25         | mitochondrial ribosomal protein         | chr3p25              | translation                                   | ---     | 1.18          | 1.18            | 1.10      | 1.08        | 1.03      | 1.07        | -1.22      | -1.08        | -1.68      | -1.53        | -1.49      | -1.64        |
| MRPS27         | mitochondrial ribosomal protein         | chr5q13.2            | 0                                             | ---     | 1.01          | -1.00           | -1.04     | 1.01        | -1.04     | -1.01       | 1.06       | -1.01        | 1.05       | 1.05         | -1.08      | -1.08        |
| MRPS28         | mitochondrial ribosomal protein         | chr8q21.1-q21.2      | anatomical structure morphogenesis            | ---     | 1.10          | 1.07            | -1.06     | -1.01       | 1.02      | -1.09       | 1.14       | 1.08         | -1.08      | 1.01         | -1.06      | -1.17        |
| MRPS30         | mitochondrial ribosomal protein         | chr5q11              | translation                                   | ---     | -1.05         | -1.03           | 1.04      | 1.10        | 1.05      | 1.01        | 1.14       | 1.06         | 1.28       | 1.12         | 1.43       | 1.36         |
| MRPS30         | mitochondrial ribosomal protein         | chr5q11              | translation                                   | ---     | 1.04          | 1.04            | 1.04      | 1.03        | -1.02     | -1.02       | 1.01       | -1.08        | -1.18      | -1.15        | -1.29      | -1.30        |
| MRPS30         | mitochondrial ribosomal protein         | chr5q11              | translation                                   | ---     | -1.08         | -1.04           | 1.13      | 1.19        | 1.14      | 1.20        | 1.06       | 1.02         | -1.28      | -1.21        | -1.37      | -1.39        |
| MRPS31         | mitochondrial ribosomal protein         | chr13q14.11          | 0                                             | ---     | -1.04         | 1.02            | 1.02      | -1.08       | 1.13      | 1.00        | -1.01      | 1.09         | -1.05      | -1.22        | 1.08       | 1.06         |
| MRPS31P5 ///   | mitochondrial ribosomal protein         | chr13q /// chr13q14  | hematopoietic progenitor cell differentiation | ---     | 1.61          | 1.44            | -1.09     | -1.19       | 1.13      | 1.15        | -1.09      | -1.20        | -1.48      | -1.79        | -1.24      | -1.37        |
| MRPS33         | mitochondrial ribosomal protein         | chr7q34              | translation                                   | ---     | -1.01         | -1.09           | -1.06     | -1.07       | 1.09      | -1.04       | -1.10      | -1.06        | -1.13      | -1.17        | -1.33      | -1.26        |
| MRPS35         | mitochondrial ribosomal protein         | chr12p11             | DNA damage response, detection of DNA         | ---     | 1.01          | -1.00           | -1.06     | 1.00        | -1.03     | 1.02        | 1.02       | 1.02         | -1.03      | 1.13         | 1.05       | 1.09         |
| MRPS36         | mitochondrial ribosomal protein         | chr5q13.2            | translation                                   | ---     | -1.09         | -1.11           | -1.07     | 1.01        | -1.15     | -1.10       | -1.09      | 1.06         | 1.14       | 1.04         | 1.02       | 1.03         |
| MRPS5          | mitochondrial ribosomal protein         | chr2p11.2-q11.2      | translation                                   | ---     | -1.05         | -1.07           | -1.03     | -1.07       | 1.02      | -1.03       | 1.17       | 1.07         | 1.29       | 1.18         | 1.29       | 1.29         |
| MRPS5          | mitochondrial ribosomal protein         | chr2p11.2-q11.2      | translation                                   | ---     | -1.27         | -1.27           | -1.03     | 1.12        | 1.33      | 1.14        | 1.27       | 1.12         | 1.24       | 1.18         | 1.18       | 1.26         |
| MRPS6          | mitochondrial ribosomal protein         | chr21q22.11          | translation                                   | ---     | -1.05         | 1.04            | 1.03      | -1.11       | 1.12      | 1.00        | -1.00      | -1.10        | 1.22       | 1.20         | 1.27       | 1.34         |
| MRRF           | mitochondrial ribosome recycling factor | chr9q33.2            | translation                                   | ---     | 1.01          | -1.00           | -1.03     | -1.04       | 1.01      | -1.04       | 1.11       | -1.08        | -1.29      | -1.26        | -1.57      | -1.62        |
| MRS2           | MRS2 magnesium transporter              | chr6p22.3-p22.1      | transport                                     | ---     | 1.04          | 1.01            | -1.02     | -1.14       | -1.06     | -1.00       | 1.11       | 1.03         | -1.65      | -1.35        | -1.16      | -1.45        |
| MRS2           | MRS2 magnesium transporter              | chr6p22.3-p22.1      | transport                                     | ---     | 1.06          | 1.04            | 1.13      | 1.24        | -1.15     | -1.09       | -1.24      | -1.01        | -1.71      | -1.49        | -1.28      | -1.36        |
| MRS2           | MRS2 magnesium transporter              | chr6p22.3-p22.1      | transport                                     | ---     | -1.10         | -1.01           | 1.06      | -1.11       | 1.09      | -1.01       | -1.20      | 1.01         | -1.14      | -1.56        | -1.12      | -1.12        |
| MRT04          | mRNA turnover 4 homolog                 | chr1p36.13           | ribosome biogenesis                           | ---     | -1.06         | -1.01           | -1.04     | 1.02        | 1.01      | -1.13       | 1.20       | 1.15         | 1.30       | 1.05         | 1.27       | 1.22         |
| MS4A12         | membrane-spanning 4-domain type A       | chr11q12             | 0                                             | ---     | -1.89         | 1.21            | 1.17      | 1.41        | 3.21      | 5.89        | -2.43      | -2.47        | 2.37       | -1.85        | -1.91      | -4.53        |
| MS4A3          | membrane-spanning 4-domain type A       | chr11q12.1           | 0                                             | ---     | 2.15          | -1.36           | -1.36     | -1.00       | -2.51     | -1.56       | -1.12      | -1.03        | 1.76       | 2.18         | 1.02       | -1.68        |
| MS4A7          | membrane-spanning 4-domain type A       | chr11q12             | 0                                             | ---     | 1.49          | -1.06           | -1.23     | -1.65       | -1.27     | -1.80       | -1.05      | -2.89        | -1.23      | -2.42        | -3.88      | -2.44        |
| MSANTD2        | Myb/SANT-like DNA-binding domain        | chr11q24.2           | 0                                             | ---     | -1.02         | -1.11           | -1.02     | -1.01       | 1.15      | 1.14        | -1.18      | -1.13        | -1.76      | -1.59        | -1.79      | -2.50        |
| MSANTD3        | Myb/SANT-like DNA-binding domain        | chr9q31.1            | 0                                             | ---     | -1.06         | 1.01            | -1.11     | -1.15       | -1.07     | -1.12       | 1.13       | -1.08        | 1.28       | 1.41         | 1.15       | 1.05         |
| MSANTD3        | Myb/SANT-like DNA-binding domain        | chr9q31.1            | 0                                             | ---     | 1.03          | 1.01            | 1.03      | 1.04        | -1.04     | -1.03       | 1.37       | 1.17         | 1.85       | 1.87         | 1.24       | 1.38         |
| MSANTD3-TMEFF1 | readthrough domain                      | chr9q /// chr9q31    | multicellular organismal development          | ---     | 1.12          | 1.12            | -1.04     | -1.12       | 1.00      | 1.12        | 1.32       | 1.19         | -1.04      | 1.35         | -1.28      | -1.45        |

| ID      | Gene Title                  | Chromosomal Location | 1st Gene Ontology Biological Process       | Pathway                             | A2497 30 mins | A2497P' 30 mins | A2497 2 h | A2497P' 2 h | A2497 4 h | A2497P' 4 h | A2497 24 h | A2497P' 24 h | A2497 48 h | A2497P' 48 h | A2497 72 h | A2497P' 72 h |
|---------|-----------------------------|----------------------|--------------------------------------------|-------------------------------------|---------------|-----------------|-----------|-------------|-----------|-------------|------------|--------------|------------|--------------|------------|--------------|
| MSANTD4 | Myb/SANT-like DNA-bind      | chr11q22             | 0                                          | ---                                 | 1.01          | 1.01            | -1.01     | -1.09       | 1.03      | 1.12        | 1.23       | -1.13        | 1.13       | 1.05         | 1.31       | 1.37         |
| MSANTD4 | Myb/SANT-like DNA-bind      | chr11q22             | 0                                          | ---                                 | 1.32          | 1.15            | 1.21      | 1.52        | -1.54     | -1.66       | 1.26       | 1.40         | 1.09       | 1.37         | 1.96       | 1.79         |
| MSH2    | mutS homolog 2, colon can   | chr2p21              | meiotic mismatch repair                    | ---                                 | 1.16          | 1.23            | -1.02     | -1.20       | -1.05     | -1.00       | -1.16      | -1.20        | -1.50      | -1.49        | -1.20      | -1.24        |
| MSH3    | mutS homolog 3 (E. coli)    | chr5q11-q12          | meiotic mismatch repair                    | ---                                 | -1.00         | -1.06           | -1.10     | 1.05        | 1.01      | 1.05        | 1.13       | 1.12         | -1.11      | -1.15        | -1.37      | -1.33        |
| MSH6    | mutS homolog 6 (E. coli)    | chr2p16              | meiotic mismatch repair                    | ---                                 | 1.80          | 1.92            | -1.17     | -1.92       | -6.74     | 1.03        | 1.08       | 1.44         | -1.31      | -2.34        | -2.86      | 1.01         |
| MSI1    | musashi RNA-binding prot    | chr12q24             | nervous system development                 | ---                                 | 1.40          | 1.63            | -2.28     | -8.01       | 1.81      | 1.82        | -5.96      | -1.20        | 5.23       | 9.38         | -1.70      | -4.39        |
| MSI2    | musashi RNA-binding prot    | chr17q22             | stem cell development                      | ---                                 | 1.02          | 1.05            | 1.03      | -1.05       | 1.09      | -1.07       | 1.07       | -1.00        | 1.03       | -1.08        | -1.53      | -2.08        |
| MSI2    | musashi RNA-binding prot    | chr17q22             | stem cell development                      | ---                                 | 1.07          | -1.06           | -1.24     | -1.15       | -1.37     | -1.22       | 1.38       | 1.25         | -1.46      | 1.26         | 1.24       | 1.46         |
| MSI2    | musashi RNA-binding prot    | chr17q22             | stem cell development                      | ---                                 | 1.15          | 1.07            | 1.10      | 1.05        | 1.04      | 1.10        | -1.27      | -1.13        | -2.11      | -1.71        | -2.33      | -2.13        |
| MSI2    | musashi RNA-binding prot    | chr17q22             | stem cell development                      | ---                                 | 1.13          | 1.01            | 1.06      | 1.14        | 1.10      | -1.05       | 1.18       | 1.45         | -1.26      | -1.36        | -1.85      | -1.59        |
| MSI2    | musashi RNA-binding prot    | chr17q22             | stem cell development                      | ---                                 | 1.85          | 1.48            | 1.24      | 1.00        | 1.19      | 1.11        | 1.34       | -1.13        | -1.41      | -1.56        | -1.90      | -1.35        |
| MSI2    | musashi RNA-binding prot    | chr17q22             | stem cell development                      | ---                                 | 1.47          | 1.30            | 1.38      | 1.03        | -1.20     | 1.15        | -1.34      | -1.01        | -1.55      | -1.41        | 1.68       | 1.14         |
| MSI2    | musashi RNA-binding prot    | chr17q22             | stem cell development                      | ---                                 | 1.06          | -1.05           | 1.06      | 1.12        | -1.02     | -1.13       | 1.86       | 1.44         | 1.82       | 1.67         | 1.84       | 1.80         |
| MSL1    | male-specific lethal 1 home | chr17q21.1           | chromatin modification                     | ---                                 | 1.01          | -1.02           | 1.07      | 1.15        | -1.09     | -1.12       | 1.42       | 1.23         | -1.26      | -1.20        | -1.31      | -1.44        |
| MSL3    | male-specific lethal 3 home | chrXp22.3            | transcription, DNA-dependent               | ---                                 | 1.13          | 1.16            | 1.05      | -1.21       | 1.07      | 1.04        | -1.24      | -1.16        | -1.72      | -1.96        | -1.05      | -1.34        |
| MSL3    | male-specific lethal 3 home | chrXp22.3            | transcription, DNA-dependent               | ---                                 | -1.03         | -1.22           | -1.16     | -1.25       | 1.26      | 1.41        | 1.26       | 1.10         | 1.36       | 1.37         | -1.02      | -1.31        |
| MSMO1   | methylsterol monooxygenase  | chr4q32-q34          | lipid metabolic process                    | Cholesterol_Biosynthesis // GenMAPP | 1.05          | 1.09            | 1.07      | -1.04       | -1.01     | -1.07       | 1.03       | -1.16        | 2.17       | 1.86         | 1.98       | 1.87         |
| MSRA    | methionine sulfoxide reduc  | chr8p23.1            | cellular protein modification process      | ---                                 | -1.03         | -1.08           | 1.01      | 1.09        | 1.05      | -1.03       | 1.02       | 1.15         | -1.40      | -1.35        | -1.89      | -1.99        |
| MSRB1   | methionine sulfoxide reduc  | chr16p13.3           | actin filament polymerization              | ---                                 | 1.09          | 1.08            | -1.06     | 1.02        | -1.05     | -1.17       | 1.12       | 1.10         | -1.16      | -1.39        | -1.37      | -1.60        |
| MSRB2   | methionine sulfoxide reduc  | chr10p12             | regulation of transcription, DNA-depend    | ---                                 | 1.15          | -1.17           | -1.05     | -1.10       | -1.14     | 1.10        | -1.13      | -1.04        | -1.81      | -1.83        | -4.05      | -2.86        |
| MSRB2   | methionine sulfoxide reduc  | chr10p12             | regulation of transcription, DNA-depend    | ---                                 | -1.03         | -1.09           | 1.09      | 1.13        | 1.03      | -1.04       | 1.07       | 1.13         | 1.07       | -1.07        | -1.50      | -1.27        |
| MSRB2   | methionine sulfoxide reduc  | chr10p12             | regulation of transcription, DNA-depend    | ---                                 | -1.09         | -1.07           | -1.07     | 1.06        | -1.01     | -1.00       | -1.27      | -1.48        | -1.99      | -1.98        | -1.74      | -2.07        |
| MSRB3   | methionine sulfoxide reduc  | chr12q14.3           | protein repair                             | ---                                 | 1.02          | -1.15           | 1.21      | 1.32        | 1.03      | -1.10       | 1.11       | 1.13         | 1.42       | 1.42         | 1.57       | 1.44         |
| MSRB3   | methionine sulfoxide reduc  | chr12q14.3           | protein repair                             | ---                                 | 1.09          | 1.16            | 1.11      | -1.17       | -1.05     | 1.01        | -1.14      | -1.06        | -2.02      | -1.77        | -3.36      | -3.58        |
| MSS51   | MSS51 mitochondrial trans   | chr10q22.2           | social behavior                            | ---                                 | -1.32         | -1.58           | 1.17      | 1.19        | 1.54      | 1.54        | 1.25       | 1.14         | -1.26      | -1.01        | 1.37       | 1.25         |
| MSTO1   | misato homolog 1 (Drosop    | chr1q22              | mitochondrion organization                 | ---                                 | -1.12         | -1.11           | -1.02     | 1.06        | 1.02      | -1.01       | -1.02      | 1.10         | -1.96      | -1.95        | -2.48      | -1.90        |
| MSX2    | msh homeobox 2              | chr5q35.2            | negative regulation of transcription from  | ---                                 | 1.13          | -1.45           | -1.91     | -1.55       | -1.19     | -1.33       | -1.56      | -1.05        | 2.16       | 1.59         | -1.63      | -1.61        |
| MSX2    | msh homeobox 2              | chr5q35.2            | negative regulation of transcription from  | ---                                 | 1.11          | 1.85            | -1.21     | -1.26       | -1.70     | 1.15        | -1.62      | -1.67        | 1.29       | 1.24         | 1.40       | -1.01        |
| MT1E    | metallothionein 1E          | chr16q13             | negative regulation of growth              | ---                                 | -1.01         | 1.04            | -1.00     | -1.00       | -1.03     | -1.13       | 1.20       | 1.05         | 1.24       | -1.03        | -1.09      | -1.20        |
| MT1F    | metallothionein 1F          | chr16q13             | negative regulation of growth              | ---                                 | -1.02         | 1.11            | -1.09     | -1.25       | 1.22      | 1.06        | 1.20       | 1.10         | 1.67       | 1.47         | 1.46       | 1.39         |
| MT1F    | metallothionein 1F          | chr16q13             | negative regulation of growth              | ---                                 | 1.06          | 1.06            | -1.04     | -1.15       | 1.02      | 1.03        | 1.19       | 1.16         | 1.49       | 1.52         | 1.21       | 1.22         |
| MT1G    | metallothionein 1G          | chr16q13             | monocyte differentiation                   | ---                                 | -1.36         | -1.16           | -1.05     | -1.41       | 1.21      | 1.05        | 1.39       | 1.36         | 1.55       | 1.46         | 1.53       | 1.77         |
| MT1H    | metallothionein 1H          | chr16q13             | negative regulation of growth              | ---                                 | 1.11          | -1.02           | -1.11     | -1.02       | 1.04      | 1.03        | 1.10       | -1.33        | 1.58       | 1.44         | 1.36       | 1.47         |
| MT1HL1  | metallothionein 1H-like 1   | chr1q43              | 0                                          | ---                                 | 1.02          | 1.21            | -1.02     | 1.09        | -1.21     | -1.32       | -1.13      | -1.16        | 1.32       | 1.20         | 1.31       | 1.33         |
| MT1X    | metallothionein 1X          | chr16q13             | response to metal ion                      | ---                                 | 1.05          | 1.08            | -1.07     | -1.11       | -1.08     | -1.04       | 1.16       | 1.02         | 1.90       | 1.70         | 1.60       | 1.67         |
| MT1X    | metallothionein 1X          | chr16q13             | response to metal ion                      | ---                                 | -1.01         | 1.04            | -1.13     | -1.20       | -1.05     | -1.03       | 1.14       | -1.01        | 1.79       | 1.69         | 1.63       | 1.82         |
| MT2A    | metallothionein 2A          | chr16q13             | cellular copper ion homeostasis            | ---                                 | -1.02         | 1.06            | -1.01     | 1.01        | 1.03      | -1.08       | 1.30       | 1.16         | 1.78       | 1.30         | 1.33       | 1.28         |
| MT3     | metallothionein 3           | chr16q13             | protein import into nucleus, translocation | ---                                 | -1.34         | 1.34            | 1.39      | 2.03        | -1.62     | -1.10       | -1.45      | -1.01        | 1.72       | 1.82         | -1.13      | 1.24         |
| MTAP    | methylthioadenosine phosph  | chr9p21              | sulfur amino acid metabolic process        | ---                                 | 1.07          | -1.00           | 1.11      | 1.01        | 1.04      | 1.05        | 1.03       | -1.05        | 1.06       | -1.06        | 1.20       | 1.01         |
| MTAP    | methylthioadenosine phosph  | chr9p21              | sulfur amino acid metabolic process        | ---                                 | 1.23          | 1.32            | 1.23      | -1.09       | -1.13     | 1.15        | -1.36      | -1.15        | -1.50      | -1.16        | -1.71      | -1.78        |
| MTAP    | methylthioadenosine phosph  | chr9p21              | sulfur amino acid metabolic process        | ---                                 | 1.05          | -1.03           | 1.04      | -1.15       | 1.10      | -1.04       | -1.17      | -1.16        | 1.19       | -1.05        | 1.17       | 1.15         |
| MTBP    | Mdm2, transformed 3T3 ce    | chr8q24.12           | cell cycle                                 | ---                                 | 1.17          | -1.07           | 1.11      | -1.11       | 1.08      | 1.32        | -1.04      | -1.38        | -2.79      | -2.73        | -2.58      | -2.86        |
| MTCH2   | mitochondrial carrier 2     | chr11p11.2           | transport                                  | ---                                 | 1.03          | 1.03            | -1.05     | -1.20       | -1.09     | -1.04       | -1.11      | -1.07        | -1.15      | 1.01         | -1.39      | -1.37        |
| MTCP1   | mature T-cell proliferation | chrXq28              | cell proliferation                         | ---                                 | -1.05         | -1.26           | 1.13      | 1.35        | -1.15     | -1.03       | -1.16      | -1.07        | -3.78      | -2.88        | -3.24      | -2.85        |
| MTDH    | metadherin                  | chr8q22.1            | negative regulation of transcription from  | ---                                 | -1.02         | 1.04            | -1.02     | -1.05       | -1.10     | -1.03       | -1.01      | -1.06        | -1.05      | -1.04        | 1.02       | -1.01        |
| MTDH    | metadherin                  | chr8q22.1            | negative regulation of transcription from  | ---                                 | -1.03         | 1.04            | 1.08      | -1.06       | -1.10     | -1.03       | -1.14      | -1.10        | -1.60      | -1.52        | -1.30      | -1.43        |
| MTDH    | metadherin                  | chr8q22.1            | negative regulation of transcription from  | ---                                 | 1.01          | 1.03            | -1.04     | -1.07       | -1.03     | 1.03        | -1.06      | -1.30        | -1.16      | -1.34        | -1.38      | ---          |
| MTERFD2 | MTERF domain containing     | chr2q37.3            | rRNA processing                            | ---                                 | 1.23          | -1.05           | -1.06     | 1.11        | -1.06     | -1.10       | 1.22       | -1.02        | -1.92      | -1.63        | 1.03       | -1.11        |
| MTERFD3 | MTERF domain containing     | chr12q24.1           | transcription, DNA-dependent               | ---                                 | 1.01          | -1.06           | 1.04      | 1.16        | 1.08      | -1.03       | 1.23       | 1.42         | 1.23       | 1.39         | 1.57       | ---          |
| MTERFD3 | MTERF domain containing     | chr12q24.1           | transcription, DNA-dependent               | ---                                 | -1.09         | -1.10           | -1.00     | 1.19        | 1.04      | 1.05        | -1.29      | -1.07        | -1.67      | -1.44        | -1.51      | -1.40        |
| MTF1    | metal-regulatory transcript | chr1p33              | transcription, DNA-dependent               | ---                                 | 1.10          | -1.01           | 1.07      | -1.20       | 1.11      | 1.03        | -1.11      | -1.27        | 1.24       | 1.06         | 1.64       | 1.19         |
| MTF1    | metal-regulatory transcript | chr1p33              | transcription, DNA-dependent               | ---                                 | -1.18         | -1.18           | 1.07      | -1.04       | -1.03     | -1.10       | -1.10      | -1.16        | 1.22       | 1.18         | 1.59       | 1.57         |
| MTF1    | metal-regulatory transcript | chr1p33              | transcription, DNA-dependent               | ---                                 | -1.10         | -1.07           | 1.26      | 1.12        | 1.14      | 1.02        | 1.20       | 1.11         | 1.42       | 1.24         | 1.44       | 1.61         |
| MTF2    | metal response element bin  | chr1p22.1            | negative regulation of transcription from  | ---                                 | -1.13         | 1.06            | 1.10      | -1.16       | 1.32      | 1.15        | 1.14       | 1.01         | -1.06      | -1.03        | 1.27       | 1.15         |
| MTFP1   | mitochondrial fission proc  | chr22q               | mitochondrial fission                      | ---                                 | 1.10          | 1.03            | 1.01      | 1.08        | -1.17     | -1.14       | 1.18       | 1.05         | 1.61       | 1.64         | 1.32       | 1.52         |
| MTFR1   | mitochondrial fission regul | chr8q13.1            | mitochondrial fission                      | ---                                 | -1.12         | -1.09           | 1.04      | 1.02        | -1.10     | -1.26       | -1.05      | -1.09        | -1.26      | 1.03         | 1.18       | -1.06        |
| MTFR1   | mitochondrial fission regul | chr8q13.1            | mitochondrial fission                      | ---                                 | 1.09          | 1.10            | -1.04     | 1.03        | -1.10     | 1.02        | -1.23      | -1.11        | -1.02      | 1.07         | 1.18       | 1.06         |
| MTFR2   | mitochondrial fission regul | chr6q23.3            | mitochondrial fission                      | ---                                 | 1.05          | 1.17            | 1.06      | 1.04        | 1.05      | -1.07       | -1.02      | 1.01         | 1.15       | 1.30         | 1.88       | 1.28         |
| MTFR2   | mitochondrial fission regul | chr6q23.3            | mitochondrial fission                      | ---                                 | 1.11          | 1.08            | 1.08      | -1.02       | -1.08     | -1.03       | -1.10      | -1.09        | 1.24       | 1.38         | 1.51       | 1.26         |
| MTFR2   | mitochondrial fission regul | chr6q23.3            | mitochondrial fission                      | ---                                 | 1.25          | 1.12            | 1.18      | 1.17        | -1.24     | 1.22        | 1.64       | -1.05        | 3.35       | 2.22         | 2.06       | 3.07         |
| MTG1    | mitochondrial ribosome-ass  | chr10q26.3           | GTP catabolic process                      | ---                                 | -1.02         | -1.04           | -1.01     | 1.13        | 1.22      | 1.03        | 1.18       | 1.07         | -1.40      | -1.47        | -3.13      | -2.58        |
| MTG2    | mitochondrial ribosome-ass  | chr20q13.33          | GTP catabolic process                      | ---                                 | 1.04          | -1.12           | 1.05      | -1.20       | 1.31      | 1.13        | 2.12       | 1.50         | -1.79      | -1.43        | -2.61      | -1.39        |
| MTG2    | mitochondrial ribosome-ass  | chr20q13.33          | GTP catabolic process                      | ---                                 | -1.08         | -1.13           | 1.02      | 1.13        | -1.06     | -1.15       | 1.27       | 1.37         | 2.03       | 1.32         | 1.95       | 2.08         |
| MTHFD1  | methylenetetrahydrofolate   | chr14q24             | histidine biosynthetic process             | ---                                 | -1.05         | -1.06           | -1.02     | 1.08        | 1.02      | -1.02       | -1.01      | -1.02        | -1.23      | -1.20        | -1.36      | -1.24        |
| MTHFD1  | methylenetetrahydrofolate   | chr14q24             | histidine biosynthetic process             | ---                                 | 1.30          | 1.16            | -1.14     | 1.10        | 1.05      | 1.11        | 1.62       | 1.33         | -1.00      | 1.19         | 1.22       | 1.28         |
| MTHFD1L | methylenetetrahydrofolate   | chr6q25.1            | one-carbon metabolic process               | ---                                 | 1.68          | 1.18            | 1.07      | -1.11       | -1.66     | 1.08        | 1.60       | 1.49         | 1.89       | 2.12         | 1.59       | 1.41         |

| ID                                  | Gene Title                       | Chromosomal Location | 1st Gene Ontology Biological Process       | Pathway                          | A2497 30 mins | A2497P' 30 mins | A2497 2 h | A2497P' 2 h | A2497 4 h | A2497P' 4 h | A2497 24 h | A2497P' 24 h | A2497 48 h | A2497P' 48 h | A2497 72 h | A2497P' 72 h |
|-------------------------------------|----------------------------------|----------------------|--------------------------------------------|----------------------------------|---------------|-----------------|-----------|-------------|-----------|-------------|------------|--------------|------------|--------------|------------|--------------|
| MTHFD2                              | methylenetetrahydrofolate        | chr2p13.1            | one-carbon metabolic process               | Nucleotide_Metabolism // GenMAPP | 1.13          | 1.07            | -1.01     | -1.07       | -1.04     | 1.09        | -1.14      | -1.09        | 1.28       | 1.25         | 1.39       | 1.22         |
| MTHFD2L                             | methylenetetrahydrofolate        | chr4d13.1            | histidine biosynthetic process             | ---                              | -1.17         | -1.08           | 1.05      | 1.28        | 1.24      | 1.07        | -1.00      | 1.21         | 1.65       | 1.37         | 1.43       | 1.14         |
| MTHFD2L                             | methylenetetrahydrofolate        | chr4d13.3            | histidine biosynthetic process             | ---                              | 1.29          | 1.21            | 1.03      | 1.15        | 1.10      | 1.10        | 1.15       | -1.31        | -1.69      | -1.21        | -2.29      | -2.19        |
| MTHFD2L                             | methylenetetrahydrofolate        | chr4d13.3            | histidine biosynthetic process             | ---                              | 1.20          | 1.15            | 1.00      | -1.03       | -1.15     | 1.03        | -1.25      | -1.12        | -1.16      | -1.01        | -1.69      | -1.83        |
| MTHFD2L                             | methylenetetrahydrofolate        | chr4q13.3            | histidine biosynthetic process             | ---                              | 1.64          | 1.52            | 1.21      | 1.07        | 1.12      | 1.34        | -1.05      | -1.10        | -2.13      | -1.12        | -3.86      | -2.28        |
| MTHFR                               | methylenetetrahydrofolate        | chr1p36.3            | cellular amino acid metabolic process      | ---                              | 1.24          | 1.84            | 1.05      | -1.12       | 1.21      | 1.49        | 1.36       | 1.23         | 1.45       | 1.51         | 1.54       | 1.70         |
| MTHFR                               | methylenetetrahydrofolate        | chr1p36.3            | cellular amino acid metabolic process      | ---                              | 1.02          | 1.01            | 1.02      | -1.05       | -1.17     | 1.10        | -1.39      | -1.13        | 1.07       | 1.16         | 1.73       | 1.79         |
| MTHFSD                              | methylenetetrahydrofolate        | chr16q24.1           | folic acid-containing compound biosyn      | ---                              | -1.25         | 1.08            | -1.11     | 1.20        | 1.24      | -1.02       | -1.30      | -1.10        | 1.06       | -1.19        | 1.19       | 1.36         |
| MTHFSD                              | methylenetetrahydrofolate        | chr16q24.1           | folic acid-containing compound biosyn      | ---                              | 1.15          | 1.08            | 1.18      | 1.27        | -1.04     | 1.22        | 1.03       | 1.07         | -1.14      | -1.20        | -1.41      | -1.17        |
| MTHFSD                              | methylenetetrahydrofolate        | chr16q24.1           | folic acid-containing compound biosyn      | ---                              | -1.10         | -1.10           | -1.03     | -1.06       | -1.13     | -1.03       | -1.09      | -1.03        | -1.45      | -1.29        | -1.28      | -1.24        |
| MTL5                                | metallothionein-like 5, testis   | chr11q13.2-q13.3     | cellular metal ion homeostasis             | ---                              | 1.19          | 3.78            | -1.90     | 2.08        | 1.15      | -1.21       | 1.83       | 1.74         | -2.09      | 1.21         | 5.19       | 5.86         |
| MTL5                                | metallothionein-like 5, testis   | chr11q13.2-q13.3     | cellular metal ion homeostasis             | ---                              | 2.32          | 1.94            | 1.06      | -1.37       | -1.20     | 1.06        | 1.34       | 1.60         | 1.07       | 1.57         | 1.98       | 2.24         |
| MTM1                                | myotubularin 1                   | chrXq28              | protein dephosphorylation                  | ---                              | 1.30          | 1.26            | 1.05      | -1.14       | 1.01      | 1.03        | -1.22      | -1.16        | -1.53      | -1.38        | -1.14      | -1.34        |
| MTMR1                               | myotubularin related protein     | chrXq28              | phospholipid metabolic process             | ---                              | 1.06          | 1.07            | -1.06     | -1.05       | -1.03     | 1.05        | -1.05      | -1.11        | -1.11      | -1.05        | -1.34      | -1.35        |
| MTMR1                               | myotubularin related protein     | chrXq28              | phospholipid metabolic process             | ---                              | 1.01          | 1.04            | -1.04     | -1.02       | -1.09     | 1.02        | -1.16      | -1.14        | -1.14      | -1.06        | -1.36      | -1.30        |
| MTMR10                              | myotubularin related protein     | chr15q13.3           | dephosphorylation                          | ---                              | -1.09         | -1.06           | -1.00     | 1.06        | 1.01      | -1.02       | -1.04      | -1.08        | -1.64      | -1.53        | -1.12      | -1.20        |
| MTMR12                              | myotubularin related protein     | chr5p13.3            | dephosphorylation                          | ---                              | 1.01          | -1.21           | 1.09      | 1.13        | 1.06      | -1.05       | -1.15      | -1.09        | 1.73       | 1.61         | 2.00       | 2.14         |
| MTMR12                              | myotubularin related protein     | chr5p13.3            | dephosphorylation                          | ---                              | 1.05          | -1.03           | -1.12     | -1.02       | -1.10     | -1.05       | -1.28      | -1.05        | -1.24      | -1.15        | -1.17      | -1.19        |
| MTMR2                               | myotubularin related protein     | chr11q22             | negative regulation of receptor internaliz | ---                              | -1.06         | -1.02           | -1.02     | -1.03       | -1.00     | -1.01       | -1.02      | -1.03        | 1.18       | 1.22         | 1.20       | 1.11         |
| MTMR2                               | myotubularin related protein     | chr11q22             | negative regulation of receptor internaliz | ---                              | 1.01          | -1.02           | 1.02      | 1.06        | 1.02      | 1.01        | -1.04      | -1.00        | 1.51       | 1.54         | 1.60       | 1.54         |
| MTMR2                               | myotubularin related protein     | chr11q22             | negative regulation of receptor internaliz | ---                              | -1.12         | -1.11           | 1.01      | 1.01        | 1.03      | -1.01       | -1.06      | 1.07         | 1.35       | 1.39         | 1.16       | 1.21         |
| MTMR3                               | myotubularin related protein     | chr22q12.2           | protein dephosphorylation                  | ---                              | -1.02         | -1.00           | -1.04     | -1.01       | -1.09     | -1.16       | -1.11      | -1.10        | -1.17      | 1.11         | 1.36       | 1.24         |
| MTMR4                               | myotubularin related protein     | chr17q22-q23         | protein dephosphorylation                  | ---                              | -1.11         | -1.08           | -1.04     | -1.00       | 1.01      | 1.04        | -1.02      | -1.06        | -1.13      | -1.10        | -1.54      | -1.26        |
| MTMR4                               | myotubularin related protein     | chr17q22-q23         | protein dephosphorylation                  | ---                              | 1.10          | 1.00            | 1.06      | -1.03       | -1.02     | -1.03       | -1.15      | -1.10        | -1.50      | -1.13        | -1.70      | -1.69        |
| MTMR7                               | myotubularin related protein     | chr8p22              | protein dephosphorylation                  | ---                              | -1.07         | -1.07           | 1.15      | 1.04        | -1.26     | 1.03        | -1.43      | 1.08         | 1.62       | 1.43         | 1.03       | 1.30         |
| MTMR9                               | myotubularin related protein     | chr8p23-p22          | dephosphorylation                          | ---                              | 1.08          | 1.06            | 1.16      | 1.16        | 1.09      | 1.07        | -1.23      | -1.19        | -1.58      | -1.38        | -1.51      | -1.12        |
| MTND1P33 // MT-ND1 pseudogene 33 // | ---                              | ---                  | 0                                          | ---                              | 2.80          | 2.00            | -1.16     | 2.02        | -4.05     | -1.52       | -1.61      | 1.08         | 1.90       | 1.54         | 3.13       | 2.19         |
| MTO1                                | mitochondrial tRNA transfer RNA  | chr6q13              | tRNA wobble uridine modification           | ---                              | -1.02         | -1.06           | 1.06      | 1.16        | 1.01      | 1.01        | -1.07      | 1.07         | 1.07       | -1.00        | 1.23       | 1.35         |
| MTO1                                | mitochondrial tRNA transfer RNA  | chr6q13              | tRNA wobble uridine modification           | ---                              | 1.14          | 1.42            | 1.03      | -1.44       | -1.46     | 1.42        | 1.06       | -1.01        | -1.08      | -1.22        | 1.43       | 1.66         |
| MTO1                                | mitochondrial tRNA transfer RNA  | chr6q13              | tRNA wobble uridine modification           | ---                              | -1.01         | -1.04           | 1.08      | 1.36        | 1.10      | 1.07        | -1.11      | -1.01        | 1.06       | 1.15         | 1.14       | 1.26         |
| MTPAP                               | mitochondrial poly(A) polymerase | chr10p11.23          | transcription, DNA-dependent               | ---                              | -1.10         | 1.00            | -1.02     | -1.04       | 1.22      | -1.05       | 1.23       | 1.10         | 1.21       | -1.09        | 2.32       | 1.37         |
| MTPAP                               | mitochondrial poly(A) polymerase | chr10p11.23          | transcription, DNA-dependent               | ---                              | 1.05          | 1.08            | 1.03      | 1.04        | -1.09     | 1.03        | -1.08      | 1.09         | -1.14      | -1.19        | 1.10       | 1.05         |
| MTPAP                               | mitochondrial poly(A) polymerase | chr10p11.23          | transcription, DNA-dependent               | ---                              | 1.03          | 1.07            | 1.02      | 1.01        | 1.05      | 1.04        | -1.04      | -1.10        | -1.23      | -1.11        | 1.12       | 1.14         |
| MTR                                 | 5-methyltetrahydrofolate-h       | chr1q43              | sulfur amino acid metabolic process        | ---                              | 1.09          | -1.04           | 1.07      | 1.05        | -1.00     | -1.07       | 1.06       | 1.04         | -1.32      | -1.27        | -1.22      | -1.16        |
| MTRF1                               | mitochondrial translational      | chr13q14.1-q14.3     | translation                                | ---                              | -1.14         | -1.16           | -1.19     | -1.18       | 1.05      | -1.21       | -1.05      | -1.09        | -1.16      | -1.23        | 1.20       | 1.20         |
| MTRF1                               | mitochondrial translational      | chr13q14.1-q14.3     | translation                                | ---                              | -1.04         | -1.05           | -1.10     | -1.04       | -1.11     | 1.09        | -1.34      | -1.15        | -1.50      | -1.30        | -1.40      | -1.66        |
| MTRF1L                              | mitochondrial translational      | chr6q25-q26          | translation                                | ---                              | -1.01         | -1.04           | 1.08      | 1.04        | 1.12      | 1.06        | 1.16       | 1.02         | 1.05       | -1.02        | 1.29       | 1.24         |
| MTRR                                | 5-methyltetrahydrofolate-h       | chr5p15.31           | sulfur amino acid metabolic process        | ---                              | -1.03         | 1.09            | -1.09     | -1.08       | -1.12     | -1.04       | -1.14      | -1.05        | -1.24      | -1.18        | -1.10      | -1.18        |
| MTSS1                               | metastasis suppressor 1          | chr8p22              | cellular component movement                | ---                              | 1.62          | 1.33            | 1.13      | 1.42        | -1.43     | -1.35       | 1.18       | 1.23         | 1.52       | 1.38         | 2.61       | 1.42         |
| MTSS1                               | metastasis suppressor 1          | chr8p22              | cellular component movement                | ---                              | -1.37         | -1.05           | 1.20      | -1.02       | -1.08     | -1.11       | 1.10       | -1.76        | 1.40       | 1.32         | 1.04       | -1.21        |
| MTSS1                               | metastasis suppressor 1          | chr8p22              | cellular component movement                | ---                              | 1.08          | 1.23            | 1.10      | 1.19        | 1.28      | 1.12        | -1.18      | -1.23        | 1.25       | 1.25         | 1.82       | 2.00         |
| MTUS1                               | microtubule associated tum       | chr8p22              | oxidation-reduction process                | ---                              | -1.00         | -1.07           | 1.04      | 1.04        | -1.01     | 1.10        | -1.12      | -1.05        | -1.90      | -1.55        | -1.65      | -1.48        |
| MTUS1                               | microtubule associated tum       | chr8p22              | cellular response to peptide hormone stim  | ---                              | 1.19          | 1.37            | 1.23      | 1.03        | 1.06      | 1.27        | 1.85       | 1.09         | -2.16      | -2.43        | -1.62      | -1.61        |
| MTUS1                               | microtubule associated tum       | chr8p22              | oxidation-reduction process                | ---                              | -1.04         | -1.04           | 1.25      | 1.11        | 1.13      | 1.15        | -1.15      | -1.14        | -2.36      | -1.68        | -1.56      | -1.79        |
| MTUS1                               | microtubule associated tum       | chr8p22              | oxidation-reduction process                | ---                              | -1.04         | -1.06           | 1.06      | -1.04       | 1.04      | 1.05        | 1.01       | -1.00        | -2.11      | -1.73        | -1.99      | -1.93        |
| MTUS2                               | microtubule associated tum       | chr13q12.3           | 0                                          | ---                              | -1.20         | -1.11           | 1.06      | 1.10        | -1.12     | -1.13       | -1.18      | 1.09         | -2.17      | -2.15        | -1.43      | -1.01        |
| MTUS2                               | microtubule associated tum       | chr13q12.3           | 0                                          | ---                              | 1.07          | -1.08           | -1.19     | -1.02       | 1.02      | 1.16        | -1.34      | -1.19        | -1.37      | -1.32        | -1.32      | -1.06        |
| MTUS2                               | microtubule associated tum       | chr13q12.3           | 0                                          | ---                              | 1.13          | -1.05           | 1.12      | 1.04        | -1.00     | -1.12       | -1.30      | -1.06        | -1.72      | -1.41        | -1.33      | 1.09         |
| MTUS2                               | microtubule associated tum       | chr13q12.3           | 0                                          | ---                              | -1.06         | -1.16           | 1.01      | -1.07       | 1.00      | -1.20       | -1.48      | -1.27        | -1.87      | -1.48        | -1.80      | -1.45        |
| MTX1                                | metaxin 1                        | chr1q21              | protein targeting to mitochondrion         | ---                              | -1.08         | -1.02           | -1.07     | -1.14       | -1.18     | -1.01       | 1.00       | 1.11         | 1.13       | 1.16         | -1.08      | 1.08         |
| MTX3                                | metaxin 3                        | chr5q14.1            | protein targeting to mitochondrion         | ---                              | 1.05          | 1.03            | -1.10     | -1.08       | -1.14     | 1.06        | -1.15      | -1.11        | 1.10       | 1.20         | 1.38       | 1.35         |
| MTX3                                | metaxin 3                        | chr5q14.1            | protein targeting to mitochondrion         | ---                              | -1.03         | -1.03           | -1.19     | -1.47       | -1.35     | -1.07       | -1.20      | 1.14         | 1.55       | 1.58         | 1.01       | -1.22        |
| MUC1                                | mucin 1, cell surface associ     | chr1q21              | DNA damage response, signal transducti     | ---                              | -1.17         | -1.04           | -1.10     | -1.12       | -1.06     | -1.16       | 1.11       | 1.05         | 1.42       | 1.13         | 1.34       | 1.48         |
| MUC1                                | mucin 1, cell surface associ     | chr1q21              | DNA damage response, signal transducti     | ---                              | -1.03         | -1.10           | 1.01      | -1.06       | 1.03      | 1.05        | 1.13       | 1.06         | 1.38       | 1.35         | 1.52       | 1.69         |
| MUC1                                | mucin 1, cell surface associ     | chr1q21              | DNA damage response, signal transducti     | ---                              | 1.04          | -1.00           | 1.00      | 1.04        | -1.01     | -1.01       | 1.21       | 1.08         | 1.42       | 1.22         | 1.48       | 1.55         |
| MUC13                               | mucin 13, cell surface assoc     | chr3q21.2            | O-glycan processing                        | ---                              | -1.05         | -1.11           | 1.05      | -1.07       | 1.00      | 1.09        | 1.14       | 1.08         | 6.64       | 3.09         | 12.36      | 8.08         |
| MUC13                               | mucin 13, cell surface assoc     | chr3q21.2            | O-glycan processing                        | ---                              | 1.17          | -1.32           | 1.12      | 1.51        | -1.05     | -1.11       | 1.14       | 1.68         | 6.98       | 3.37         | 12.14      | 9.39         |
| MUC16                               | mucin 16, cell surface assoc     | chr19p13.2           | cell adhesion                              | ---                              | 1.09          | -1.07           | 1.07      | 1.10        | 1.26      | 1.05        | 1.09       | 1.13         | -1.41      | -1.57        | -3.30      | -2.29        |
| MUC17                               | mucin 17, cell surface assoc     | chr7q22.1            | negative regulation of cell-substrate adhe | ---                              | -1.06         | 1.39            | -1.07     | -1.10       | -1.72     | 1.10        | 1.86       | 1.66         | 1.56       | -1.02        | 1.40       | -1.36        |
| MUC7                                | mucin 7, secreted                | chr4q13.3            | O-glycan processing                        | ---                              | 1.32          | 1.07            | 2.89      | 3.16        | 1.18      | -1.40       | 4.04       | 2.87         | 1.37       | 1.37         | 2.04       | 2.56         |
| MUM1                                | melanoma associated antigen      | chr19p13.3           | DNA repair                                 | ---                              | -1.28         | -1.15           | -1.07     | 1.01        | -1.50     | -1.47       | -1.10      | -1.15        | -2.05      | -2.24        | -1.49      | -1.33        |
| MUM1                                | melanoma associated antigen      | chr19p13.3           | DNA repair                                 | ---                              | 1.22          | 1.12            | 1.12      | 1.27        | 1.09      | 1.04        | 1.10       | -1.23        | -1.61      | -1.45        | -1.16      | -1.00        |
| MUM1                                | melanoma associated antigen      | chr19p13.3           | DNA repair                                 | ---                              | -1.33         | -1.27           | -1.05     | -1.18       | 1.29      | 1.23        | -1.18      | -1.10        | -2.10      | -2.41        | -2.28      | -1.92        |
| MUM1                                | melanoma associated antigen      | chr19p13.3           | DNA repair                                 | ---                              | -1.00         | -1.07           | 1.06      | 1.10        | 1.03      | 1.00        | -1.09      | -1.09        | -2.16      | -2.17        | -3.32      | -3.00        |
| MUS81                               | MUS81 structure-specific         | chr11q13             | DNA metabolic process                      | ---                              | -1.02         | -1.04           | 1.03      | 1.17        | 1.15      | 1.03        | 1.25       | 1.14         | -1.03      | -1.29        | -1.34      | -1.16        |
| MUSTN1 //                           | musculoskeletal, embryonic       | chr3p21.1            | embryonic limb morphogenesis               | ---                              | -2.03         | 1.02            | 1.54      | 1.38        | 1.00      | -1.16       | -1.18      | 1.85         | -2.60      | -2.85        | -1.24      | 1.42         |

| ID       | Gene Title                                     | Chromosomal Location | 1st Gene Ontology Biological Process            | Pathway                                | A2497 30 mins | A2497P' 30 mins | A2497 2 h | A2497P' 2 h | A2497 4 h | A2497P' 4 h | A2497 24 h | A2497P' 24 h | A2497 48 h | A2497P' 48 h | A2497 72 h | A2497P' 72 h |
|----------|------------------------------------------------|----------------------|-------------------------------------------------|----------------------------------------|---------------|-----------------|-----------|-------------|-----------|-------------|------------|--------------|------------|--------------|------------|--------------|
| MUTYH    | mutY homolog (E. coli)                         | chr1p34.1            | DNA repair                                      | ---                                    | -1.05         | -1.21           | -1.12     | 1.09        | -1.01     | -1.16       | 1.23       | -1.12        | -1.43      | -1.44        | -1.71      | -1.34        |
| MVB12B   | multivesicular body subunit 12B                | chr9p33.3            | transport                                       | ---                                    | 1.15          | 1.39            | 1.27      | 1.15        | -1.17     | -2.52       | -3.47      | -2.58        | -1.43      | -2.01        | 2.00       | -1.60        |
| MVB12B   | multivesicular body subunit 12B                | chr9p33.3            | transport                                       | ---                                    | 1.67          | 1.18            | -1.03     | -1.33       | 2.37      | -1.30       | 1.62       | 2.03         | -20.64     | -20.58       | -1.27      | -1.11        |
| MVD      | mevalonate (diphospho) dehydrogenase           | chr16q24.3           | lipid metabolic process                         | Cholesterol_Biosynthesis // GenMAPP    | 1.00          | -1.08           | 1.20      | 1.43        | -1.00     | -1.08       | 1.10       | 1.15         | 3.14       | 2.55         | 3.32       | 3.70         |
| MVK      | mevalonate kinase                              | chr12q24             | lipid metabolic process                         | Cholesterol_Biosynthesis // GenMAPP    | -1.36         | -1.27           | -1.12     | -1.07       | -1.17     | -1.06       | -1.45      | -1.52        | -1.42      | -1.14        | 2.10       | 2.53         |
| MVK      | mevalonate kinase                              | chr12q24             | lipid metabolic process                         | Cholesterol_Biosynthesis // GenMAPP    | 1.05          | -1.05           | -1.28     | -1.13       | -1.14     | -1.26       | -1.01      | -1.24        | 1.47       | 1.17         | 1.72       | 1.81         |
| MVK      | mevalonate kinase                              | chr12q24             | lipid metabolic process                         | Cholesterol_Biosynthesis // GenMAPP    | 1.11          | 1.17            | 1.07      | 1.13        | -1.04     | 1.04        | -1.05      | 1.18         | 1.64       | 1.39         | 1.95       | 2.17         |
| MVP      | major vault protein                            | chr16p11.2           | transport                                       | ---                                    | 1.01          | -1.04           | -1.03     | 1.10        | -1.05     | -1.17       | 1.10       | 1.08         | 1.34       | 1.10         | 1.34       | 1.56         |
| MX1      | myxovirus (influenza virus) hemagglutinin      | chr21q22.3           | GTP catabolic process                           | ---                                    | -1.04         | -1.10           | 1.01      | -1.16       | 1.18      | -1.04       | 2.31       | 1.95         | 1.25       | -1.07        | 1.17       | -1.12        |
| MX2      | myxovirus (influenza virus) hemagglutinin      | chr21q22.3           | GTP catabolic process                           | ---                                    | 1.29          | 1.25            | -1.42     | -1.24       | 1.49      | 1.55        | 2.66       | 1.66         | 2.35       | 1.37         | 1.24       | 1.24         |
| MXD1     | MAX dimerization protein 1                     | chr2p13-p12          | transcription, DNA-dependent                    | ---                                    | 1.08          | 1.25            | 1.17      | -1.13       | -1.29     | -1.14       | 1.40       | 1.36         | 1.76       | 1.62         | 1.99       | 1.21         |
| MXD1     | MAX dimerization protein 1                     | chr2p13-p12          | transcription, DNA-dependent                    | ---                                    | 1.22          | 1.12            | 1.12      | -1.01       | -1.07     | -1.07       | -1.06      | -1.03        | 1.20       | 1.20         | 1.30       | 1.34         |
| MXRA5    | matrix-remodelling associated protein 5        | chrXp22.33           | 0                                               | ---                                    | -1.02         | -1.03           | 1.05      | 1.33        | -1.03     | 1.07        | 1.09       | -1.13        | -2.30      | -1.55        | -2.81      | -1.90        |
| MXRA7    | matrix-remodelling associated protein 7        | chr17q25.1           | 0                                               | ---                                    | -1.09         | -1.05           | 1.01      | 1.08        | 1.16      | 1.09        | 1.05       | 1.17         | -1.02      | 1.20         | -1.38      | -1.17        |
| MXRA7    | matrix-remodelling associated protein 7        | chr17q25.1           | 0                                               | ---                                    | 1.02          | -1.05           | -1.04     | 1.05        | 1.04      | 1.08        | 1.05       | 1.07         | 1.07       | 1.34         | 1.06       | 1.24         |
| MYADM    | myeloid-associated differentiation factor 1    | chr19q13.42          | 0                                               | ---                                    | -1.07         | -1.01           | -1.00     | -1.09       | 1.14      | 1.05        | 1.21       | 1.18         | 1.74       | 1.52         | 1.42       | 1.33         |
| MYB      | v-myb myeloblastosis viral oncogene homolog B  | chr6q22-q23          | G1                                              | ---                                    | -1.23         | -1.65           | 1.24      | 1.28        | -1.03     | -1.10       | 1.11       | 1.01         | 1.40       | -1.19        | -1.85      | -1.64        |
| MYBBP1A  | MYB binding protein 1 (P16)                    | chr17p13.3           | transcription, DNA-dependent                    | ---                                    | 1.13          | 1.23            | 1.09      | -1.06       | -1.04     | -1.09       | -1.11      | -1.13        | 1.32       | -1.24        | 1.38       | 1.49         |
| MYBL2    | v-myb myeloblastosis viral oncogene homolog B2 | chr20q13.1           | mitotic cell cycle                              | ---                                    | 1.11          | 1.01            | 1.09      | 1.14        | 1.05      | 1.04        | 1.29       | 1.04         | 1.21       | -1.03        | -1.34      | -1.23        |
| MYCBP2   | MYC binding protein 2, E3                      | chr13q22             | transcription, DNA-dependent                    | ---                                    | -1.06         | -1.14           | 1.10      | 1.13        | 1.14      | 1.22        | -1.04      | -1.08        | -1.38      | -1.20        | -1.30      | -1.15        |
| MYCBP2   | MYC binding protein 2, E3                      | chr13q22             | transcription, DNA-dependent                    | ---                                    | -1.09         | -1.13           | 1.03      | 1.04        | 1.06      | 1.04        | 1.08       | 1.14         | -1.16      | -1.11        | -1.25      | -1.18        |
| MYCBP2   | MYC binding protein 2, E3                      | chr13q22             | transcription, DNA-dependent                    | ---                                    | -1.14         | -1.03           | -1.00     | 1.10        | 1.13      | 1.03        | 1.15       | 1.08         | -1.11      | -1.16        | -1.13      | -1.15        |
| MYCBPAP  | MYCBP associated protein                       | chr17q21.33          | endocytosis                                     | ---                                    | -3.73         | -1.71           | 1.67      | -4.69       | 1.46      | -1.08       | -1.51      | -3.09        | 2.91       | 3.85         | -1.65      | -2.41        |
| MYD88    | myeloid differentiation factor 88              | chr3p22              | toll-like receptor signaling pathway            | ---                                    | 1.15          | 1.10            | 1.01      | 1.09        | 1.08      | 1.08        | -1.05      | -1.12        | -1.02      | -1.16        | 1.03       | 1.15         |
| MYEF2    | myelin expression factor 2                     | chr15q21.1           | transcription, DNA-dependent                    | ---                                    | -1.25         | 1.63            | 4.11      | 2.39        | 1.12      | 1.26        | 4.00       | 2.14         | -6.00      | -1.53        | 5.79       | 12.29        |
| MYEF2    | myelin expression factor 2                     | chr15q21.1           | transcription, DNA-dependent                    | ---                                    | -1.24         | -1.06           | -3.79     | -1.72       | 1.38      | -1.21       | -1.91      | -1.83        | 1.52       | -2.31        | 1.15       | -1.01        |
| MYEOV2   | myeloma overexpressed 2                        | chr2q37.3            | 0                                               | ---                                    | -1.00         | 1.00            | -1.07     | -1.02       | -1.09     | 1.01        | -1.09      | -1.03        | -1.03      | -1.03        | -1.08      | -1.11        |
| MYH10    | myosin, heavy chain 10, non-muscle             | chr17p13             | mitotic cytokinesis                             | ---                                    | -1.12         | -1.12           | 1.06      | 1.08        | 1.02      | -1.10       | 1.13       | 1.17         | 1.00       | 1.07         | -1.43      | -1.10        |
| MYH10    | myosin, heavy chain 10, non-muscle             | chr17p13             | mitotic cytokinesis                             | ---                                    | 1.04          | 1.10            | -1.04     | -1.02       | -1.04     | 1.07        | -1.06      | -1.04        | -1.36      | -1.01        | -1.57      | -1.42        |
| MYH11    | myosin, heavy chain 11, smooth muscle          | chr16p13.11          | muscle contraction                              | ---                                    | -1.08         | -2.71           | -1.10     | 1.67        | 1.13      | 1.05        | 1.08       | 1.32         | 1.73       | 1.07         | 1.79       | 1.90         |
| MYH11    | myosin, heavy chain 11, smooth muscle          | chr16p13.11          | muscle contraction                              | ---                                    | 1.05          | -1.05           | -1.05     | 1.17        | 1.05      | 1.01        | 1.03       | -1.23        | 1.68       | 1.38         | 1.32       | 1.56         |
| MYH11    | myosin, heavy chain 11, smooth muscle          | chr16p13.11          | muscle contraction                              | ---                                    | -1.17         | -1.14           | 1.05      | 1.22        | -1.00     | 1.16        | -1.13      | -1.01        | 1.53       | 1.23         | 1.54       | 1.45         |
| MYL12A   | myosin, light chain 12A, regulatory            | chr18p11.31          | regulation of cell shape                        | ---                                    | -1.18         | -1.12           | -1.06     | 1.02        | 1.52      | 1.10        | 1.29       | 1.43         | 3.46       | 2.88         | 2.82       | 2.31         |
| MYL12A   | myosin, light chain 12A, regulatory            | chr18p11.31          | muscle contraction                              | ---                                    | 1.67          | 1.06            | -1.04     | 1.00        | -1.06     | -1.00       | 1.01       | -1.12        | 1.32       | 1.20         | 1.13       | 1.07         |
| MYL2     | myosin, light chain 2, regulatory              | chr12q24.11          | heart morphogenesis                             | Smooth_muscle_contraction // GenMAPP   | 1.04          | 1.03            | -1.44     | 1.33        | 2.62      | -2.56       | 1.12       | -2.22        | 2.42       | 3.23         | -3.71      | -1.11        |
| MYL5     | myosin, light chain 5, regulatory              | chr4p16.3            | regulation of muscle contraction                | ---                                    | -1.13         | -1.21           | -1.02     | 1.10        | -1.03     | 1.04        | -1.23      | -1.05        | -1.72      | -1.50        | -2.99      | -2.54        |
| MYL6     | myosin, light chain 6, alkaline                | chr12q13.2           | muscle contraction                              | ---                                    | -1.06         | 1.02            | -1.07     | -1.03       | -1.03     | -1.04       | 1.05       | -1.01        | 1.25       | 1.15         | 1.05       | 1.02         |
| MYL6     | myosin, light chain 6, alkaline                | chr12q13.2           | muscle contraction                              | ---                                    | 1.08          | -1.03           | 1.26      | 1.58        | 1.38      | 1.17        | -1.13      | -1.14        | -2.00      | -1.78        | -1.26      | -1.11        |
| MYL6B    | myosin, light chain 6B, alkaline               | chr12q13.13          | muscle contraction                              | ---                                    | -1.10         | 1.01            | -1.02     | -1.05       | 1.05      | -1.12       | 1.26       | 1.14         | 1.23       | 1.10         | -1.17      | -1.10        |
| MYL9     | myosin, light chain 9, regulatory              | chr20q11.23          | muscle contraction                              | Striated_muscle_contraction // GenMAPP | -1.23         | -1.29           | 1.05      | 1.09        | 1.23      | 1.17        | 1.26       | 1.14         | 1.03       | -1.22        | -1.46      | -1.60        |
| MYLIP    | myosin regulatory light chain                  | chr6p23-p22.3        | cellular component movement                     | ---                                    | 1.21          | 1.15            | 1.34      | 1.04        | -1.04     | -1.04       | -1.05      | 1.22         | -1.24      | -1.06        | 1.33       | -1.04        |
| MYLIP    | myosin regulatory light chain                  | chr6p23-p22.3        | cellular component movement                     | ---                                    | 1.13          | 1.08            | 1.32      | -1.02       | -1.05     | 1.06        | 1.33       | 1.21         | -1.13      | -1.61        | 1.11       | 1.30         |
| MYLK     | myosin light chain kinase                      | chr3q21              | protein phosphorylation                         | ---                                    | 1.17          | 1.35            | 1.01      | -1.08       | -1.15     | 1.10        | -1.01      | 1.05         | -1.89      | -2.47        | -2.13      | -2.46        |
| MYLK     | myosin light chain kinase                      | chr3q21              | protein phosphorylation                         | ---                                    | -1.19         | -1.01           | 1.03      | 1.24        | -1.84     | -3.11       | 1.99       | 2.91         | -3.08      | -4.19        | -1.45      | -2.79        |
| MYLK     | myosin light chain kinase                      | chr3q21              | protein phosphorylation                         | ---                                    | -1.17         | -1.29           | -1.04     | 1.25        | 1.15      | 1.23        | -1.23      | 1.06         | -1.26      | -1.42        | -2.64      | -2.37        |
| MYLK3    | myosin light chain kinase 3                    | chr16q11.2           | regulation of vascular permeability involved in | ---                                    | -1.51         | -1.09           | 1.44      | 1.21        | -1.18     | 1.00        | -1.45      | -1.15        | -1.60      | -1.20        | -2.97      | -3.85        |
| MYLK3    | myosin light chain kinase 3                    | chr16q11.2           | regulation of vascular permeability involved in | ---                                    | 1.06          | -1.14           | 1.01      | -1.17       | -1.08     | 1.06        | -1.31      | -1.21        | -2.94      | -2.17        | -3.76      | -3.68        |
| MYLK-AS1 | MYLK antisense RNA 1                           | chr3q21              | 0                                               | ---                                    | -1.34         | -1.26           | -1.01     | 1.35        | 1.11      | 1.06        | 1.26       | 1.34         | -1.17      | -1.02        | -2.52      | -1.47        |
| MYNN     | myoneurin                                      | chr3q26.2            | transcription, DNA-dependent                    | ---                                    | 1.13          | 1.12            | 1.03      | -1.04       | 1.03      | 1.03        | 1.38       | 1.26         | 1.62       | 1.34         | 2.99       | 2.28         |
| MYNN     | myoneurin                                      | chr3q26.2            | transcription, DNA-dependent                    | ---                                    | 1.00          | 1.13            | -1.00     | -1.02       | 1.01      | 1.07        | -1.09      | -1.01        | -1.17      | -1.10        | 1.34       | 1.31         |
| MYO10    | myosin X                                       | chr5p15.1-p14.3      | transport                                       | ---                                    | -1.16         | -1.24           | 1.08      | 1.02        | -1.06     | 1.02        | -1.35      | -1.17        | -1.22      | -1.05        | -1.47      | -1.23        |
| MYO10    | myosin X                                       | chr5p15.1-p14.3      | transport                                       | ---                                    | 1.14          | -1.02           | -1.10     | -1.02       | 1.11      | 1.13        | -1.05      | 1.01         | -1.33      | -1.42        | -1.33      | -1.24        |
| MYO10    | myosin X                                       | chr5p15.1-p14.3      | transport                                       | ---                                    | -1.08         | -1.00           | -1.01     | 1.05        | -1.01     | -1.04       | -1.01      | 1.06         | 1.08       | 1.15         | -1.04      | -1.06        |
| MYO15B   | myosin XVb pseudogene                          | chr17q25.1           | 0                                               | ---                                    | -1.05         | -1.15           | -1.26     | 1.02        | -1.08     | 1.03        | -1.14      | -1.05        | 1.06       | 1.21         | -1.30      | -1.16        |
| MYO16    | myosin XVI                                     | chr13q33.3           | negative regulation of cell proliferation       | ---                                    | -1.08         | 1.03            | 1.14      | 1.08        | 1.07      | 1.02        | -1.14      | 1.04         | -2.93      | -2.60        | -4.15      | -3.32        |
| MYO16    | myosin XVI                                     | chr13q33.3           | negative regulation of cell proliferation       | ---                                    | 1.31          | -1.63           | 1.48      | 1.18        | 1.30      | -1.67       | 1.28       | 1.11         | -2.46      | -1.75        | -2.27      | -2.05        |
| MYO19    | myosin XIX                                     | chr17q12             | 0                                               | ---                                    | 1.03          | -1.01           | 1.00      | 1.16        | 1.20      | 1.10        | 1.02       | -1.09        | 1.17       | 1.05         | 1.23       | 1.43         |
| MYO1B    | myosin IB                                      | chr2q12-q34          | actin filament-based movement                   | ---                                    | 1.06          | 1.00            | -1.18     | -1.25       | 1.13      | 1.03        | -1.03      | -1.16        | 1.56       | 1.57         | 1.64       | 1.54         |
| MYO1D    | myosin ID                                      | chr17q11-q12         | negative regulation of phosphatase activity     | ---                                    | -1.22         | -1.86           | -1.50     | -1.04       | 1.36      | 2.75        | -4.93      | -2.74        | 2.20       | -2.33        | 1.31       | 4.99         |
| MYO1G    | myosin IG                                      | chr7p13-p11.2        | 0                                               | ---                                    | -1.06         | -1.49           | -1.32     | -1.23       | -1.61     | -1.33       | 1.22       | 1.16         | -1.06      | 1.20         | 1.01       | -1.16        |
| MYO1G    | myosin IG                                      | chr7p13-p11.2        | 0                                               | ---                                    | -1.48         | -1.55           | 1.28      | -1.43       | -1.16     | -1.19       | 1.51       | 1.32         | 1.32       | 1.30         | 2.18       | 3.36         |
| MYO5A    | myosin VA (heavy chain 1)                      | chr15q21             | ubiquitin-dependent protein catabolic process   | ---                                    | 1.16          | 1.01            | -1.02     | -1.03       | 1.20      | 1.23        | -1.49      | -1.20        | -2.89      | -1.82        | -3.27      | -3.72        |
| MYO5A    | myosin VA (heavy chain 1)                      | chr15q21             | ubiquitin-dependent protein catabolic process   | ---                                    | 1.11          | -1.03           | 1.01      | 1.17        | 1.15      | 1.05        | -1.03      | 1.11         | -1.62      | -1.26        | -2.65      | -2.58        |
| MYO5B    | myosin VB                                      | chr18q21             | transport                                       | Fatty_Acid_Degradation // GenMAPP      | -1.11         | -1.12           | 1.03      | 1.05        | 1.03      | -1.08       | -1.05      | -1.01        | -1.00      | 1.17         | -1.39      | -1.41        |
| MYO5C    | myosin VC                                      | chr15q21             | establishment of secretory granule localization | ---                                    | 1.02          | 1.03            | -1.06     | -1.02       | 1.04      | 1.06        | -1.10      | -1.06        | -2.38      | -1.75        | -6.09      | -5.74        |
| MYO6     | myosin VI                                      | chr6q13              | protein targeting                               | ---                                    | 1.03          | -1.00           | 1.18      | 1.28        | 1.16      | 1.06        | -1.20      | 1.09         | -1.57      | -1.58        | -1.01      | -1.55        |

| ID      | Gene Title                               | Chromosomal Location | 1st Gene Ontology Biological Process             | Pathway                                | A2497 30 mins | A2497P' 30 mins | A2497 2 h | A2497P' 2 h | A2497 4 h | A2497P' 4 h | A2497 24 h | A2497P' 24 h | A2497 48 h | A2497P' 48 h | A2497 72 h | A2497P' 72 h |
|---------|------------------------------------------|----------------------|--------------------------------------------------|----------------------------------------|---------------|-----------------|-----------|-------------|-----------|-------------|------------|--------------|------------|--------------|------------|--------------|
| MYO7B   | myosin VIIB                              | chr2q21.1            | 0                                                | ---                                    | -2.44         | -2.72           | -8.37     | 1.02        | 1.05      | -1.94       | -2.35      | -3.20        | 1.30       | 1.44         | -1.25      | -1.32        |
| MYO9A   | myosin IXA                               | chr15q22-q23         | signal transduction                              | ---                                    | -1.20         | -1.32           | -1.03     | 1.20        | 1.01      | 1.23        | -1.20      | -1.02        | -1.67      | 1.01         | -1.43      | -1.17        |
| MYO9A   | myosin IXA                               | chr15q22-q23         | signal transduction                              | ---                                    | -1.10         | -1.11           | 1.07      | 1.08        | 1.01      | 1.11        | -1.10      | 1.01         | -1.41      | -1.25        | -1.43      | -1.40        |
| MYO9B   | myosin IXB                               | chr19p13.1           | monocyte chemotaxis                              | ---                                    | 1.23          | 1.07            | -1.04     | 1.15        | -1.26     | -1.24       | 1.33       | 1.19         | 1.48       | 1.28         | 1.60       | 1.69         |
| MYOZ2   | myozenin 2                               | chr4q26-q27          | 0                                                | ---                                    | 2.20          | 3.95            | -6.20     | -4.59       | -9.80     | 1.07        | 2.23       | -2.35        | 6.92       | 6.03         | -1.45      | 1.22         |
| MYPN    | myopalladin                              | chr10q21.3           | sarcomere organization                           | ---                                    | -1.07         | -1.14           | 1.08      | -1.07       | 1.09      | -1.08       | 1.30       | -1.10        | 1.09       | -1.08        | 1.55       | 1.40         |
| MYRF    | myelin regulatory factor                 | chr11q12-q13.1       | transcription, DNA-dependent                     | ---                                    | 2.88          | 2.39            | 2.16      | 1.96        | 1.10      | -1.05       | -1.26      | -1.30        | 2.16       | 1.27         | 1.32       | 1.20         |
| MYRF    | myelin regulatory factor                 | chr11q12-q13.1       | transcription, DNA-dependent                     | ---                                    | -1.11         | 2.67            | -1.76     | -1.48       | -5.59     | -2.00       | -1.06      | -3.02        | 1.51       | -1.24        | 1.27       | 2.30         |
| MYT1L   | myelin transcription factor              | chr2p25.3            | transcription, DNA-dependent                     | ---                                    | 1.09          | -1.30           | -1.03     | -1.18       | -1.10     | -1.11       | -1.48      | -1.24        | -1.67      | -2.33        | -1.89      | -2.32        |
| MZB1    | marginal zone B and B1 cell              | chr5q31.2            | positive regulation of immunoglobulin biogenesis | ---                                    | 1.03          | -1.14           | -1.09     | -4.91       | 1.62      | 1.45        | 1.44       | -1.77        | -1.07      | -1.42        | -2.71      | -1.10        |
| MZF1    | myeloid zinc finger 1                    | chr19q13.4           | transcription, DNA-dependent                     | ---                                    | 1.68          | 1.85            | 2.37      | 2.38        | -1.14     | 1.18        | -4.23      | -1.80        | -1.79      | 1.12         | -2.40      | -1.62        |
| MZT1    | mitotic spindle organizing center        | chr13q22.1           | gamma-tubulin complex localization               | ---                                    | 1.11          | 1.10            | -1.06     | 1.04        | -1.17     | -1.07       | -1.10      | 1.01         | 1.39       | 1.48         | 1.40       | 1.25         |
| MZT1    | mitotic spindle organizing center        | chr13q22.1           | gamma-tubulin complex localization               | ---                                    | 1.13          | 1.21            | 1.06      | -1.11       | 1.30      | 1.10        | -1.00      | -1.16        | 1.28       | 1.40         | 1.69       | 1.50         |
| N4BP1   | NEDD4 binding protein 1                  | chr16q12.1           | negative regulation of protein ubiquitination    | ---                                    | -1.02         | -1.05           | 1.05      | -1.02       | -1.07     | -1.01       | 1.15       | 1.20         | -1.11      | -1.11        | -1.26      | -1.16        |
| N4BP2   | NEDD4 binding protein 2                  | chr4p14              | 0                                                | ---                                    | 1.17          | 1.28            | 1.04      | -1.16       | -1.23     | -1.09       | -1.40      | -1.02        | -2.13      | -1.74        | -1.51      | -2.04        |
| N4BP2L1 | NEDD4 binding protein 2-like 1           | chr13q13.1           | 0                                                | ---                                    | -1.20         | -1.24           | 2.28      | 1.68        | 1.07      | -1.99       | 1.14       | 1.94         | -2.44      | -2.09        | -1.64      | -1.77        |
| N4BP2L2 | NEDD4 binding protein 2-like 2           | chr13q13.1           | 0                                                | ---                                    | -1.11         | 1.02            | -1.14     | -1.31       | -1.63     | -1.31       | -1.20      | 1.08         | 1.34       | 1.30         | 1.73       | 1.19         |
| N4BP2L2 | NEDD4 binding protein 2-like 2           | chr13q13.1           | 0                                                | ---                                    | -1.05         | -1.05           | 1.08      | -1.06       | 1.19      | 1.22        | 1.07       | -1.03        | -1.79      | -1.65        | -1.78      | -1.55        |
| N4BP2L2 | NEDD4 binding protein 2-like 2           | chr13q13.1           | 0                                                | ---                                    | 1.61          | 1.35            | 1.17      | -1.26       | -1.08     | 1.14        | -1.27      | -1.14        | -1.91      | -1.53        | -2.13      | -2.59        |
| N4BP2L2 | NEDD4 binding protein 2-like 2           | chr13q13.1           | 0                                                | ---                                    | -1.11         | -1.02           | 1.17      | 1.16        | 1.23      | 1.27        | -1.18      | -1.02        | -1.55      | -1.64        | -1.80      | -2.02        |
| N4BP2L2 | NEDD4 binding protein 2-like 2           | chr13q13.1           | 0                                                | ---                                    | 1.16          | 1.21            | 1.14      | 1.02        | 1.19      | 1.34        | -1.09      | -1.09        | -2.09      | -1.57        | -1.76      | -1.72        |
| N4BP2L2 | NEDD4 binding protein 2-like 2           | chr13q13.1           | 0                                                | ---                                    | 1.01          | -1.02           | -1.04     | 1.10        | 1.08      | -1.04       | 1.12       | 1.01         | 1.14       | 1.04         | 1.42       | 1.50         |
| N4BP3   | NEDD4 binding protein 3                  | chr5q35.3            | 0                                                | ---                                    | -1.49         | -1.11           | -1.47     | -1.80       | -1.53     | -1.31       | 1.09       | 1.24         | 1.78       | 1.65         | 1.67       | 1.81         |
| N6AMT1  | N-6 adenine-specific DNA methylase       | chr21q21.3           | protein methylation                              | ---                                    | 1.20          | 1.18            | 1.15      | 1.16        | 1.29      | 1.05        | -1.32      | -1.02        | -3.39      | -2.61        | -2.06      | -2.87        |
| NAA15   | N(alpha)-acetyltransferase               | chr4q31.1            | angiogenesis                                     | Electron_Transport_Chain // GenMAPP    | -1.10         | -1.10           | 1.09      | -1.01       | 1.07      | -1.13       | 1.08       | -1.18        | -2.26      | -5.01        | -1.72      | -1.61        |
| NAA15   | N(alpha)-acetyltransferase               | chr4q31.1            | angiogenesis                                     | Electron_Transport_Chain // GenMAPP    | 1.03          | 1.04            | 1.09      | 1.02        | 1.01      | -1.11       | 1.10       | -1.01        | 1.18       | 1.11         | 1.32       | 1.25         |
| NAA16   | N(alpha)-acetyltransferase               | chr13q14.11          | N-terminal protein amino acid acetylation        | ---                                    | 1.11          | 1.02            | -1.01     | 1.05        | -1.06     | 1.07        | -1.18      | -1.05        | -1.57      | -1.50        | -1.16      | -1.41        |
| NAA25   | N(alpha)-acetyltransferase               | chr12q24.13          | 0                                                | ---                                    | -1.08         | -1.09           | -1.03     | -1.06       | -1.00     | 1.24        | -1.15      | 1.04         | -1.53      | -1.41        | -1.01      | -1.12        |
| NAA30   | N(alpha)-acetyltransferase               | chr14q22.3           | 0                                                | ---                                    | -1.02         | 1.01            | 1.15      | 1.17        | 1.02      | 1.13        | -1.08      | -1.11        | -1.19      | -1.17        | 1.09       | -1.03        |
| NAA30   | N(alpha)-acetyltransferase               | chr14q22.3           | 0                                                | ---                                    | -1.15         | -1.20           | 1.19      | 1.18        | 1.09      | 1.19        | -1.03      | 1.05         | -1.24      | -1.17        | 1.19       | 1.15         |
| NAA35   | N(alpha)-acetyltransferase               | chr9q21.33           | smooth muscle cell proliferation                 | ---                                    | 1.19          | 1.12            | 1.07      | 1.03        | -1.06     | -1.12       | -1.07      | -1.10        | -1.57      | -1.24        | -1.17      | 1.04         |
| NAA38   | N(alpha)-acetyltransferase               | chr7q31.1-q31.3      | mRNA splicing, via spliceosome                   | ---                                    | -1.09         | -1.19           | 1.08      | 1.14        | 1.22      | 1.06        | -1.17      | -1.13        | -2.74      | -1.78        | -2.76      | -2.24        |
| NAA38   | N(alpha)-acetyltransferase               | chr7q31.1-q31.3      | mRNA splicing, via spliceosome                   | ---                                    | 1.01          | 1.02            | 1.03      | -1.00       | 1.11      | 1.05        | 1.07       | -1.15        | -1.08      | -1.06        | -1.10      | -1.10        |
| NAA38   | N(alpha)-acetyltransferase               | chr7q31.1-q31.3      | mRNA splicing, via spliceosome                   | ---                                    | 1.08          | -1.29           | -1.11     | -1.19       | -1.00     | -1.38       | 1.08       | 1.44         | -2.42      | -1.87        | -4.00      | -3.02        |
| NAA40   | N(alpha)-acetyltransferase               | chr11q13.1           | 0                                                | ---                                    | 1.09          | 1.11            | -1.04     | -1.13       | -1.07     | 1.30        | -1.32      | -1.23        | -1.90      | -1.57        | -1.89      | -2.81        |
| NAA50   | N(alpha)-acetyltransferase               | chr3q13.2            | N-terminal protein amino acid acetylation        | ---                                    | 1.14          | 1.18            | -1.18     | -1.17       | -1.03     | 1.17        | -1.29      | -1.07        | -1.41      | -1.54        | -1.62      | -1.76        |
| NAAA    | N-acylethanolamine acid amidase          | chr4q21.1            | lipid metabolic process                          | ---                                    | 1.01          | 1.03            | 1.06      | 1.07        | 1.15      | -1.04       | -1.25      | -1.13        | -1.23      | -1.09        | -1.35      | -1.51        |
| NAALAD2 | N-acetylated alpha-linked hexosaminidase | chr11q14.3-q21       | proteolysis                                      | ---                                    | 1.19          | 1.15            | 1.20      | 1.13        | 1.21      | 1.20        | -1.38      | -1.06        | 1.27       | 1.37         | 1.05       | 1.14         |
| NAB1    | NGFI-A binding protein 1                 | chr2q32.3-q33        | endochondral ossification                        | ---                                    | 1.05          | 1.01            | 1.05      | -1.10       | 1.04      | -1.08       | 1.21       | 1.14         | 2.22       | 1.97         | 2.88       | 2.82         |
| NAB1    | NGFI-A binding protein 1                 | chr2q32.3-q33        | endochondral ossification                        | ---                                    | 1.07          | 1.06            | 1.01      | 1.04        | -1.05     | -1.00       | 1.06       | -1.09        | 1.29       | 1.26         | 1.26       | 1.17         |
| NAB1    | NGFI-A binding protein 1                 | chr2q32.3-q33        | endochondral ossification                        | ---                                    | 1.13          | 1.17            | 2.48      | 1.15        | 1.64      | 1.21        | -1.21      | -1.09        | 1.91       | 2.23         | 2.43       | 1.45         |
| NABP1   | nucleic acid binding protein             | chr2q32.3            | cell cycle checkpoint                            | ---                                    | -1.05         | -1.06           | -1.04     | -1.16       | -1.22     | -1.08       | -1.45      | 1.07         | -1.15      | -1.25        | 1.13       | 1.29         |
| NABP1   | nucleic acid binding protein             | chr2q32.3            | cell cycle checkpoint                            | ---                                    | -1.06         | -1.13           | -1.01     | -1.11       | -1.04     | 1.13        | -1.43      | -1.18        | -1.20      | -1.29        | 1.10       | 1.06         |
| NACA    | nascent polypeptide-associated complex   | chr12q23-q24.1       | cardiac ventricle development                    | DNA_replication_Reactome // GenMAPP // | -1.09         | 1.01            | 1.01      | 1.01        | 1.03      | -1.08       | 1.20       | 1.05         | 1.45       | 1.10         | 1.08       | 1.06         |
| NACC1   | nucleus accumbens associated protein     | chr19p13.2           | transcription, DNA-dependent                     | ---                                    | -1.12         | -1.19           | -1.04     | 1.02        | -1.03     | -1.04       | -1.03      | 1.03         | 1.24       | 1.21         | -1.05      | 1.09         |
| NACC2   | NACC family member 2, beta               | chr9q34.3            | transcription from RNA polymerase II promoter    | ---                                    | -1.01         | -1.01           | -1.00     | 1.05        | -1.05     | -1.09       | -1.18      | -1.03        | -1.24      | -1.19        | -1.30      | -1.15        |
| NADK    | NAD kinase                               | chr1p36.33           | NADP biosynthetic process                        | ---                                    | -1.05         | 1.06            | 1.18      | 1.13        | 1.10      | -1.06       | 1.01       | -1.19        | 1.59       | 1.46         | -1.08      | 1.08         |
| NADK    | NAD kinase                               | chr1p36.33           | NADP biosynthetic process                        | ---                                    | -1.06         | -1.03           | -1.02     | 1.07        | -1.04     | -1.06       | 1.09       | 1.10         | 1.34       | 1.14         | -1.01      | -1.04        |
| NADK    | NAD kinase                               | chr1p36.33           | NADP biosynthetic process                        | ---                                    | -1.07         | 1.02            | -1.01     | 1.10        | 1.36      | -1.09       | 1.16       | 1.06         | 1.15       | -1.08        | -1.04      | -1.20        |
| NADK    | NAD kinase                               | chr1p36.33           | NADP biosynthetic process                        | ---                                    | -1.01         | 1.06            | -1.04     | -1.06       | -1.03     | -1.04       | -1.02      | -1.06        | -1.08      | -1.18        | -1.26      | -1.28        |
| NADK2   | NAD kinase 2, mitochondrial              | chr5p13.2            | NADP biosynthetic process                        | ---                                    | -1.00         | 1.02            | 1.05      | 1.10        | -1.01     | 1.02        | 1.11       | 1.06         | 1.13       | 1.23         | 1.40       | 1.47         |
| NADK2   | NAD kinase 2, mitochondrial              | chr5p13.2            | NADP biosynthetic process                        | ---                                    | 1.06          | 1.08            | -1.03     | -1.05       | -1.07     | 1.12        | -1.19      | -1.01        | -1.44      | -1.11        | -1.40      | -1.44        |
| NADK2   | NAD kinase 2, mitochondrial              | chr5p13.2            | NADP biosynthetic process                        | ---                                    | 1.01          | -1.03           | -1.03     | -1.01       | -1.05     | 1.08        | -1.10      | -1.01        | -1.38      | -1.01        | -1.15      | -1.21        |
| NADSYN1 | NAD synthetase 1                         | chr11q13.4           | vitamin metabolic process                        | ---                                    | -1.06         | -1.04           | 1.02      | 1.11        | 1.09      | -1.03       | 1.20       | 1.06         | -1.18      | -1.05        | -1.77      | -1.29        |
| NADSYN1 | NAD synthetase 1                         | chr11q13.4           | vitamin metabolic process                        | ---                                    | -1.04         | -1.18           | -1.05     | 1.01        | 1.09      | -1.05       | 1.27       | 1.09         | -1.03      | -1.03        | -1.70      | -1.22        |
| NADSYN1 | NAD synthetase 1                         | chr11q13.4           | vitamin metabolic process                        | ---                                    | 1.01          | 1.18            | -1.14     | -1.05       | -1.22     | 1.07        | 1.05       | 1.02         | 2.19       | 2.01         | -1.16      | 1.48         |
| NAE1    | NEDD8 activating enzyme                  | chr16q22             | DNA replication                                  | ---                                    | 1.01          | 1.05            | -1.01     | 1.01        | 1.01      | -1.05       | -1.02      | -1.05        | -1.14      | -1.21        | -1.13      | -1.13        |
| NAF1    | nuclear assembly factor 1                | chr4q32.2            | pseudouridine synthesis                          | ---                                    | 1.38          | 1.28            | -1.01     | 1.01        | -1.24     | -1.05       | -1.22      | -1.05        | -1.83      | -2.11        | -1.32      | -1.75        |
| NAGK    | N-acetylglucosamine kinase               | chr2p13.3            | N-acetylglucosamine metabolic process            | ---                                    | -1.06         | -1.01           | -1.03     | -1.12       | 1.19      | -1.06       | -1.35      | -1.10        | -1.73      | -1.67        | -1.12      | -1.05        |
| NAGLU   | N-acetylglucosaminidase                  | chr17q21             | carbohydrate metabolic process                   | ---                                    | -1.05         | -1.16           | 1.03      | 1.05        | 1.05      | 1.02        | -1.04      | -1.10        | 1.27       | 1.22         | -1.01      | 1.23         |
| NAGPA   | N-acetylglucosamine-1-phosphatase        | chr16p13.3           | carbohydrate metabolic process                   | ---                                    | 1.32          | 1.24            | -1.00     | 1.10        | 1.10      | 1.01        | 1.22       | 1.26         | 1.16       | -1.01        | -1.40      | -1.29        |
| NAGS    | N-acetylglutamate synthase               | chr17q21.31          | urea cycle                                       | ---                                    | 1.65          | 1.84            | 1.08      | 1.14        | -1.54     | -1.32       | 1.35       | 1.17         | 1.69       | 1.90         | -1.08      | 1.29         |
| NALCN   | sodium leak channel, non-voltage-gated   | chr13q32.3           | transport                                        | ---                                    | -1.05         | 1.15            | -1.02     | 1.22        | 1.19      | -1.32       | 1.16       | 1.18         | -1.25      | -1.36        | -2.15      | -1.90        |
| NALCN   | sodium leak channel, non-voltage-gated   | chr13q32.3           | transport                                        | ---                                    | 1.12          | -1.10           | -1.02     | -1.16       | -1.14     | 1.08        | -1.07      | -1.14        | -2.15      | -1.52        | -3.86      | -4.43        |
| NAMPT   | nicotinamide phosphoribosyltransferase   | chr7q22.3            | vitamin metabolic process                        | ---                                    | 1.13          | 1.09            | 1.11      | -1.03       | 1.07      | 1.04        | 1.13       | -1.03        | 1.68       | 1.66         | 1.87       | 1.60         |
| NAMPT   | nicotinamide phosphoribosyltransferase   | chr7q22.3            | vitamin metabolic process                        | ---                                    | 1.27          | 1.35            | -1.09     | -1.48       | 1.09      | -1.12       | 1.33       | -1.16        | 3.11       | 2.98         | 4.84       | 3.25         |

| ID          | Gene Title                                      | Chromosomal Location | 1st Gene Ontology Biological Process           | Pathway                             | A2497 30 mins | A2497P' 30 mins | A2497 2 h | A2497P' 2 h | A2497 4 h | A2497P' 4 h | A2497 24 h | A2497P' 24 h | A2497 48 h | A2497P' 48 h | A2497 72 h | A2497P' 72 h |
|-------------|-------------------------------------------------|----------------------|------------------------------------------------|-------------------------------------|---------------|-----------------|-----------|-------------|-----------|-------------|------------|--------------|------------|--------------|------------|--------------|
| NAMPT       | nicotinamide phosphoribosyl transferase         | chr7q22.3            | vitamin metabolic process                      | ---                                 | 1.22          | 1.28            | 1.01      | -1.12       | -1.17     | -1.03       | 1.19       | 1.13         | 2.25       | 2.27         | 2.20       | 1.71         |
| NAMPT       | nicotinamide phosphoribosyl transferase         | chr7q22.3            | vitamin metabolic process                      | ---                                 | 1.02          | -1.13           | -1.04     | -1.03       | 1.67      | 1.35        | 1.29       | 1.14         | 1.04       | 1.25         | 1.45       | 1.47         |
| NANOS1      | nanos homolog 1 (Drosophila)                    | chr10q26.11          | epithelial cell migration                      | ---                                 | 1.10          | 1.25            | -1.40     | -1.10       | 1.18      | -1.04       | -1.57      | 1.16         | -1.46      | -1.50        | -1.19      | -1.20        |
| NANOS1      | nanos homolog 1 (Drosophila)                    | chr10q26.11          | regulation of translation                      | ---                                 | -1.11         | -1.15           | 1.14      | 1.21        | -1.04     | -1.03       | -1.70      | -1.15        | -1.98      | -1.57        | -1.38      | -1.30        |
| NANP        | N-acetylneuraminic acid phosphatase             | chr20p11.1           | carbohydrate metabolic process                 | ---                                 | 1.00          | 1.01            | 1.15      | 1.07        | 1.06      | 1.06        | 1.03       | 1.02         | 1.01       | 1.06         | 1.30       | 1.31         |
| NAP1L1      | nucleosome assembly protein 1-like 1            | chr12q21.2           | DNA replication                                | ---                                 | -1.06         | 1.04            | -1.10     | -1.04       | -1.10     | 1.00        | -1.24      | -1.15        | -1.80      | -1.26        | -1.78      | -2.07        |
| NAP1L1      | nucleosome assembly protein 1-like 1            | chr12q21.2           | DNA replication                                | ---                                 | 1.16          | 1.16            | 1.06      | 1.05        | -1.31     | -1.10       | -1.20      | -1.00        | -2.11      | -1.66        | -1.56      | -1.61        |
| NAP1L1      | nucleosome assembly protein 1-like 1            | chr12q21.2           | DNA replication                                | ---                                 | 1.01          | 1.01            | -1.05     | -1.02       | -1.12     | 1.00        | 1.01       | -1.08        | 1.08       | -1.03        | -1.09      | -1.13        |
| NAP1L1      | nucleosome assembly protein 1-like 1            | chr12q21.2           | DNA replication                                | ---                                 | 1.04          | -1.04           | -1.04     | 1.09        | -1.07     | 1.08        | -1.21      | -1.16        | -1.24      | -1.17        | -1.45      | -1.49        |
| NAP1L1      | nucleosome assembly protein 1-like 1            | chr12q21.2           | DNA replication                                | ---                                 | -1.17         | -1.10           | -1.10     | -1.05       | -1.03     | -1.01       | -1.07      | 1.01         | 1.08       | 1.07         | -1.18      | -1.13        |
| NAP1L1      | nucleosome assembly protein 1-like 1            | chr12q21.2           | DNA replication                                | ---                                 | -1.11         | -1.04           | -1.05     | -1.06       | -1.02     | -1.03       | 1.03       | 1.04         | 1.06       | 1.04         | -1.20      | -1.15        |
| NAP1L1      | nucleosome assembly protein 1-like 1            | chr12q21.2           | DNA replication                                | ---                                 | -1.08         | -1.01           | -1.06     | -1.02       | -1.03     | -1.02       | 1.13       | 1.02         | 1.25       | 1.09         | -1.03      | -1.03        |
| NAP1L4      | nucleosome assembly protein 1-like 4            | chr11p15.5           | nucleosome assembly                            | ---                                 | -1.08         | -1.08           | 1.03      | 1.23        | -1.63     | -1.38       | 1.47       | 1.30         | 1.68       | 1.90         | 1.22       | 1.08         |
| NAP1L4      | nucleosome assembly protein 1-like 4            | chr11p15.5           | nucleosome assembly                            | ---                                 | 1.47          | 1.12            | 1.40      | 1.78        | 1.18      | 1.15        | 2.14       | 2.06         | 1.50       | -2.33        | 1.07       | -1.74        |
| NAP1L4      | nucleosome assembly protein 1-like 4            | chr11p15.5           | nucleosome assembly                            | ---                                 | 1.04          | 1.05            | -1.11     | -1.05       | -1.07     | -1.06       | 1.00       | 1.08         | -1.19      | -1.12        | -1.32      | -1.13        |
| NAP1L4      | nucleosome assembly protein 1-like 4            | chr11p15.5           | nucleosome assembly                            | ---                                 | 1.09          | 1.13            | -1.05     | -1.11       | 1.15      | 1.10        | -1.05      | -1.14        | -1.46      | -1.37        | -1.45      | -1.27        |
| NAP1L5      | nucleosome assembly protein 1-like 5            | chr4q22.1/q21-q22    | nucleosome assembly                            | ---                                 | 1.13          | -1.07           | -1.08     | 1.17        | 1.01      | 1.06        | -1.20      | 1.06         | -1.79      | -1.35        | -2.11      | -1.75        |
| NAP1L5      | nucleosome assembly protein 1-like 5            | chr4q22.1/q21-q22    | nucleosome assembly                            | ---                                 | 1.02          | -1.13           | 1.13      | 1.23        | 1.06      | 1.05        | -1.23      | -1.05        | -1.46      | -1.28        | -1.99      | -1.95        |
| NAPA        | N-ethylmaleimide-sensitive protein phosphatase  | chr19q13.33          | transport                                      | ---                                 | 1.04          | -1.02           | 1.01      | 1.05        | 1.03      | 1.06        | -1.10      | 1.00         | -1.20      | -1.17        | -1.72      | -1.43        |
| NAPA        | N-ethylmaleimide-sensitive protein phosphatase  | chr19q13.33          | transport                                      | ---                                 | 1.11          | -1.04           | -1.03     | -1.02       | 1.08      | 1.01        | -1.00      | -1.02        | -1.16      | -1.10        | -1.36      | -1.26        |
| NAPB        | N-ethylmaleimide-sensitive protein phosphatase  | chr20p12.3-p11.21    | transport                                      | ---                                 | 1.06          | -1.03           | 1.13      | 1.29        | 1.24      | 1.09        | 1.32       | 1.15         | 1.32       | 1.18         | 1.76       | 1.83         |
| NAPEPLD     | N-acyl phosphatidylethanolamine phospholipase D | chr7q22.1            | lipid metabolic process                        | ---                                 | 1.20          | -1.14           | 1.13      | 1.10        | 1.08      | 1.38        | -1.52      | -1.07        | -2.78      | -2.24        | -3.50      | -2.34        |
| NAPEPLD     | N-acyl phosphatidylethanolamine phospholipase D | chr7q22.1            | lipid metabolic process                        | ---                                 | -1.09         | -1.07           | 1.14      | -1.02       | -1.03     | 1.02        | -1.08      | -1.03        | -1.36      | -1.09        | -2.03      | -1.74        |
| NAPG        | N-ethylmaleimide-sensitive protein phosphatase  | chr18p11.22          | protein complex assembly                       | ---                                 | 1.06          | 1.06            | 1.12      | 1.03        | 1.10      | 1.02        | 1.43       | 1.20         | 2.06       | 1.72         | 2.41       | 2.10         |
| NARF        | nuclear prelamins A and B                       | chr17q25.3           | 0                                              | ---                                 | -1.15         | -1.18           | 1.11      | 1.10        | 1.19      | 1.04        | 1.01       | 1.00         | 1.24       | 1.20         | 1.34       | 1.61         |
| NARG2       | NMDA receptor regulated protein 2               | chr15q22.2           | 0                                              | ---                                 | 1.16          | 1.22            | 1.06      | -1.00       | 1.05      | 1.07        | -1.02      | 1.03         | -1.96      | -1.82        | -1.31      | -1.55        |
| NARG2       | NMDA receptor regulated protein 2               | chr15q22.2           | 0                                              | ---                                 | 1.17          | 1.15            | 1.02      | -1.24       | -1.15     | 1.04        | -1.40      | -1.11        | -2.16      | -2.07        | -1.68      | -1.80        |
| NARS2       | asparaginyl-tRNA synthetase 2                   | chr11q14.1           | translation                                    | ---                                 | -1.05         | -1.08           | 1.00      | 1.08        | 1.06      | 1.01        | 1.05       | 1.03         | -1.21      | -1.17        | 1.07       | 1.03         |
| NASP        | nuclear autoantigenic sperm protein             | chr1p34.1            | blastocyst development                         | ---                                 | 1.08          | 1.02            | -1.02     | -1.01       | -1.12     | -1.09       | -1.07      | 1.03         | -1.69      | -1.49        | -2.40      | -2.68        |
| NASP        | nuclear autoantigenic sperm protein             | chr1p34.1            | blastocyst development                         | ---                                 | 1.04          | 1.04            | -1.01     | 1.01        | -1.01     | -1.11       | 1.17       | 1.13         | 1.01       | -1.23        | -1.56      | -1.67        |
| NASP        | nuclear autoantigenic sperm protein             | chr1p34.1            | blastocyst development                         | ---                                 | 1.25          | 1.13            | 1.19      | 1.25        | 1.44      | 1.27        | 1.15       | 1.14         | -2.37      | -1.96        | -4.19      | -2.78        |
| NAT1        | N-acetyltransferase 1 (aryl)                    | chr8p22              | xenobiotic metabolic process                   | ---                                 | 1.14          | 1.09            | 1.21      | 1.04        | -1.03     | 1.00        | -1.49      | -1.22        | -2.04      | -1.98        | -1.47      | -1.54        |
| NAT14       | N-acetyltransferase 14 (GC box)                 | chr19q13.42          | transcription, DNA-dependent                   | ---                                 | -1.06         | -1.11           | 1.03      | 1.06        | 1.16      | 1.03        | 1.15       | 1.12         | 1.34       | 1.30         | -1.14      | -1.23        |
| NAT6        | N-acetyltransferase 6 (GC box)                  | chr3p21.3            | 0                                              | ---                                 | 1.00          | -1.14           | 1.01      | 1.38        | 1.05      | -1.08       | 1.24       | 1.27         | 2.27       | 1.74         | 1.52       | 1.63         |
| NATSL       | N-acetyltransferase 8-like                      | chr4p16.3            | positive regulation of dopamine uptake         | ---                                 | -1.13         | -1.43           | -1.17     | -1.12       | 1.18      | 1.24        | -1.31      | 1.16         | -1.60      | -1.82        | -1.46      | -2.07        |
| NAV1        | neuron navigator 1                              | chr1q32.3            | microtubule bundle formation                   | ---                                 | -1.08         | 1.03            | 1.02      | 1.24        | 1.12      | 1.18        | -1.06      | 1.07         | 1.49       | 1.87         | 1.22       | 1.49         |
| NAV1        | neuron navigator 1                              | chr1q32.3            | microtubule bundle formation                   | ---                                 | -1.05         | -1.11           | 1.02      | 1.03        | 1.03      | -1.17       | 1.24       | -1.00        | 1.27       | 1.59         | -1.08      | 1.21         |
| NAV1        | neuron navigator 1                              | chr1q32.3            | microtubule bundle formation                   | ---                                 | -1.31         | -1.19           | -1.30     | -1.17       | 1.02      | 1.05        | 1.22       | 1.42         | 2.71       | 3.22         | 1.52       | 1.79         |
| NAV1        | neuron navigator 1                              | chr1q32.3            | microtubule bundle formation                   | ---                                 | 1.14          | 1.05            | 1.03      | 1.11        | 1.31      | 1.09        | 1.43       | 1.27         | 1.26       | 1.46         | 1.30       | 1.19         |
| NAV1        | neuron navigator 1                              | chr1q32.3            | microtubule bundle formation                   | ---                                 | 1.16          | -1.06           | 1.09      | -1.09       | 1.05      | 1.03        | 1.56       | 1.83         | 1.56       | 1.64         | 1.33       | 1.82         |
| NBAS        | neuroblastoma amplified sequence                | chr2p24              | 0                                              | ---                                 | -1.04         | -1.04           | -1.00     | 1.09        | -1.09     | -1.12       | 1.33       | 1.31         | 1.30       | 1.25         | 1.06       | 1.30         |
| NBEA        | neurobeachin                                    | chr13q13             | protein localization                           | ---                                 | 1.01          | -1.06           | 1.16      | 1.29        | -1.02     | 1.00        | 1.08       | 1.03         | -1.41      | -1.11        | -1.39      | -1.28        |
| NBEA        | neurobeachin                                    | chr13q13             | protein localization                           | ---                                 | 1.44          | 1.07            | 1.07      | 1.04        | 1.08      | 1.72        | -1.30      | -1.25        | -1.76      | -1.16        | -2.07      | -1.92        |
| NBEAL1      | neurobeachin-like 1                             | chr2q33.2            | 0                                              | ---                                 | -1.08         | -1.17           | 1.62      | 1.62        | 1.17      | 1.24        | -1.31      | -1.51        | -1.73      | -1.64        | -1.03      | -1.08        |
| NBL1        | neuroblastoma 1, DAN family                     | chr1p36.13           | nervous system development                     | ---                                 | -1.07         | -1.11           | 1.02      | -1.04       | 1.15      | 1.06        | -1.03      | 1.01         | 1.54       | 1.63         | 1.66       | 1.49         |
| NBN         | nibrin                                          | chr8q21              | cell cycle checkpoint                          | ---                                 | 1.26          | 1.25            | -1.03     | -1.08       | -1.13     | 1.07        | -1.29      | -1.06        | -1.63      | -1.55        | -1.60      | -2.16        |
| NBN         | nibrin                                          | chr8q21              | cell cycle checkpoint                          | ---                                 | -1.00         | -1.04           | 1.02      | 1.08        | 1.02      | -1.00       | 1.20       | 1.19         | 1.07       | 1.07         | 1.27       | 1.30         |
| NBPF1       | neuroblastoma breakpoint fusion protein         | chr1p36.13           | 0                                              | ---                                 | 1.09          | 1.14            | 1.03      | -1.05       | 1.03      | 1.05        | 1.12       | -1.00        | -1.72      | -1.66        | -1.36      | -1.62        |
| NBPF1       | neuroblastoma breakpoint fusion protein         | chr1p36.13           | 0                                              | ---                                 | 1.01          | 1.00            | -1.02     | -1.06       | -1.09     | 1.02        | -1.06      | 1.04         | -2.25      | -2.12        | -1.82      | -1.62        |
| NBPF8P // O | neuroblastoma breakpoint fusion protein         | ---                  | 0                                              | ---                                 | 1.08          | 1.15            | 1.11      | 1.09        | -1.12     | 1.07        | -1.03      | 1.21         | 1.21       | 1.33         | 1.03       | -1.06        |
| NBR1        | neighbor of BRCA1 gene 1                        | chr17q21.31          | macroautophagy                                 | ---                                 | 1.04          | 1.06            | 1.15      | 1.13        | 1.19      | 1.06        | 1.25       | 1.14         | 1.45       | 1.34         | 1.59       | 1.93         |
| NBR1        | neighbor of BRCA1 gene 1                        | chr17q21.31          | macroautophagy                                 | ---                                 | 1.74          | 1.24            | 1.35      | 1.16        | -1.03     | 1.19        | -1.30      | -1.66        | -3.12      | -2.09        | -1.43      | 1.05         |
| NBR1        | neighbor of BRCA1 gene 1                        | chr17q21.31          | macroautophagy                                 | ---                                 | -1.00         | 1.01            | -1.03     | 1.02        | -1.03     | -1.06       | 1.06       | -1.00        | -1.07      | -1.09        | 1.01       | -1.02        |
| NBR2        | neighbor of BRCA1 gene 2                        | chr17q21             | 0                                              | ---                                 | 1.19          | 1.08            | 1.10      | -1.05       | 1.13      | -1.18       | 1.21       | -1.00        | 1.38       | 1.17         | -1.14      | -1.75        |
| NBR2        | neighbor of BRCA1 gene 2                        | chr17q21             | 0                                              | ---                                 | -1.08         | -1.17           | 1.01      | -1.02       | 1.03      | 1.01        | -1.09      | 1.03         | -1.43      | -1.35        | -1.27      | -1.16        |
| NCALD       | neurocalin delta                                | chr8q22.2            | nucleosome assembly                            | ---                                 | -1.15         | -1.29           | 1.10      | 1.10        | 1.26      | 1.12        | -1.23      | -1.27        | -1.39      | -1.09        | 1.29       | 1.58         |
| NCAM1       | neural cell adhesion molecule 1                 | chr11q23.1           | regulation of exocyst assembly                 | ---                                 | 1.09          | -1.17           | -1.67     | -1.13       | -1.39     | -1.01       | -2.70      | 1.41         | 1.74       | 1.40         | 1.51       | 2.41         |
| NCAPD2      | non-SMC condensin I complex subunit 2           | chr12p13.3           | mitotic cell cycle                             | ---                                 | -1.12         | -1.11           | -1.03     | -1.03       | -1.04     | 1.02        | -1.01      | -1.01        | 1.05       | 1.13         | 1.13       | 1.24         |
| NCAPH2      | non-SMC condensin II complex subunit 2          | chr22q13.33          | eye development                                | ---                                 | -1.25         | -1.32           | 1.10      | -1.03       | 1.10      | 1.16        | 1.25       | 1.64         | 4.73       | 6.09         | 1.17       | 1.30         |
| NCBP1       | nuclear cap binding protein 1                   | chr9q34.1            | nuclear-transcribed mRNA catabolic process     | mRNA_processing_Reactome // GenMAPP | 1.01          | -1.04           | 1.02      | 1.01        | 1.04      | -1.04       | 1.03       | 1.02         | -1.31      | -1.31        | 1.01       | -1.00        |
| NCBP2       | nuclear cap binding protein 2                   | chr3q29              | nuclear-transcribed mRNA catabolic process     | mRNA_processing_Reactome // GenMAPP | -1.04         | -1.02           | 1.02      | 1.07        | 1.16      | -1.06       | 1.25       | 1.14         | 1.60       | 1.49         | 1.50       | 1.47         |
| NCDN        | neurochondrin                                   | chr1p34.3            | neuron projection development                  | ---                                 | -1.06         | -1.07           | 1.06      | 1.30        | -1.02     | -1.18       | -1.02      | 1.09         | -1.92      | -1.47        | -1.50      | -1.39        |
| NCF2        | neutrophil cytosolic factor 2                   | chr1q25              | antigen processing and presentation of peptide | ---                                 | -1.22         | -1.06           | 1.08      | -1.11       | 1.32      | 1.17        | 1.67       | 1.44         | -1.87      | -1.80        | -2.32      | -2.27        |
| NCK1        | NCK adaptor protein 1                           | chr3q21              | regulation of translation                      | ---                                 | 1.31          | 1.05            | 1.02      | -1.15       | -1.13     | -1.23       | 1.04       | -1.05        | 1.20       | 1.04         | 1.71       | 1.34         |
| NCK1        | NCK adaptor protein 1                           | chr3q21              | regulation of translation                      | ---                                 | 1.34          | 1.31            | 1.18      | 1.30        | -1.14     | -1.15       | 1.17       | 1.05         | 1.54       | 1.24         | 1.65       | 1.09         |
| NCK2        | NCK adaptor protein 2                           | chr2q12              | regulation of translation                      | ---                                 | 1.05          | -1.06           | 1.03      | 1.20        | -1.03     | -1.01       | -1.07      | -1.11        | -1.04      | -1.10        | -1.07      | -1.35        |

| ID                  | Gene Title                         | Chromosomal Location | 1st Gene Ontology Biological Process            | Pathway                              | A2497 30 mins | A2497P' 30 mins | A2497 2 h | A2497P' 2 h | A2497 4 h | A2497P' 4 h | A2497 24 h | A2497P' 24 h | A2497 48 h | A2497P' 48 h | A2497 72 h | A2497P' 72 h |
|---------------------|------------------------------------|----------------------|-------------------------------------------------|--------------------------------------|---------------|-----------------|-----------|-------------|-----------|-------------|------------|--------------|------------|--------------|------------|--------------|
| NCKAP1              | NCK-associated protein 1           | chr2q32              | in utero embryonic development                  | Circadian_Exercise // GenMAPP        | 1.33          | 1.05            | 1.09      | 1.07        | -1.05     | 1.30        | -1.08      | -1.17        | -1.08      | 1.14         | -1.39      | -1.45        |
| NCKAP5              | NCK-associated protein 5           | chr2q21.2            | 0                                               | ---                                  | 1.38          | 1.02            | 1.09      | 1.16        | -1.17     | 1.21        | -1.13      | 1.03         | -1.51      | -1.40        | -1.54      | -1.85        |
| NCKIPSD             | NCK interacting protein with       | chr3p21              | NLS-bearing substrate import into nucleus       | ---                                  | 1.02          | -1.00           | -1.05     | 1.24        | 1.07      | 1.08        | 1.36       | 1.31         | 1.24       | 1.34         | 1.01       | 1.42         |
| NCOA1               | nuclear receptor coactivator       | chr2p23              | negative regulation of transcription from       | ---                                  | -1.19         | -1.08           | 1.18      | 1.10        | 1.09      | -1.02       | -1.12      | -1.11        | -1.59      | -1.60        | -1.42      | -1.17        |
| NCOA1               | nuclear receptor coactivator       | chr2p23              | negative regulation of transcription from       | ---                                  | -1.41         | -1.35           | 1.11      | 1.07        | 1.09      | -1.03       | -1.19      | -1.13        | -1.87      | -1.61        | -1.39      | -1.12        |
| NCOA1               | nuclear receptor coactivator       | chr2p23              | positive regulation of transcription from       | ---                                  | -1.08         | -1.04           | 1.12      | 1.12        | 1.02      | -1.02       | 1.04       | 1.08         | -1.66      | -1.59        | -1.71      | -1.60        |
| NCOA2               | nuclear receptor coactivator       | chr8q13.3            | negative regulation of transcription from       | ---                                  | 1.37          | 1.11            | 1.09      | 1.34        | 1.00      | 1.31        | -1.38      | -1.27        | -2.08      | -2.15        | -1.58      | -1.86        |
| NCOA2               | nuclear receptor coactivator       | chr8q13.3            | negative regulation of transcription from       | ---                                  | 1.04          | -1.05           | 1.19      | -2.40       | 1.28      | 1.47        | -1.79      | -2.72        | 2.42       | 1.38         | -2.65      | -1.52        |
| NCOA4               | nuclear receptor coactivator       | chr10q11.2           | transcription, DNA-dependent                    | Circadian_Exercise // GenMAPP        | 1.06          | 1.12            | -1.01     | 1.04        | 1.06      | -1.02       | 1.03       | -1.10        | -1.17      | -1.26        | -1.09      | -1.16        |
| NCOA5               | nuclear receptor coactivator       | chr20q12-q13.12      | transcription, DNA-dependent                    | ---                                  | 1.04          | 1.10            | 1.00      | -1.11       | -1.10     | 1.08        | -1.73      | -1.39        | -3.12      | -3.16        | -2.06      | -2.34        |
| NCOA6               | nuclear receptor coactivator       | chr20q11             | DNA replication                                 | ---                                  | -1.03         | 1.39            | 1.49      | 1.42        | -1.27     | 1.13        | 1.46       | -1.15        | 2.27       | 1.24         | 1.57       | 1.34         |
| NCOA6               | nuclear receptor coactivator       | chr20q11             | DNA replication                                 | ---                                  | 1.34          | 1.16            | 1.06      | 1.16        | 1.02      | 1.00        | 1.10       | -1.11        | -1.16      | -1.37        | -1.25      | -1.16        |
| NCOA7               | nuclear receptor coactivator       | chr6q22.32           | transcription, DNA-dependent                    | ---                                  | 1.51          | 1.19            | 1.31      | -1.17       | 1.48      | 1.76        | 2.98       | 2.51         | 2.08       | 1.92         | -1.19      | -1.44        |
| NCOA7               | nuclear receptor coactivator       | chr6q22.32           | transcription, DNA-dependent                    | ---                                  | -1.04         | -1.03           | 1.02      | 1.07        | 1.05      | 1.05        | 1.18       | 1.11         | 1.14       | 1.25         | -1.10      | -1.03        |
| NCOR1               | nuclear receptor corepressor       | chr17p11.2           | negative regulation of transcription from       | Ovarian_Infertility_Genes // GenMAPP | 1.04          | 1.04            | 1.03      | 1.09        | 1.01      | 1.06        | -1.09      | -1.09        | -1.36      | -1.22        | -1.34      | -1.39        |
| NCOR1               | nuclear receptor corepressor       | chr17p11.2           | negative regulation of transcription from       | Ovarian_Infertility_Genes // GenMAPP | -1.10         | -1.11           | 1.11      | 1.00        | 1.20      | 1.03        | 1.11       | -1.07        | -1.05      | -1.06        | 1.39       | 1.40         |
| NCOR2               | nuclear receptor corepressor       | chr12q24             | negative regulation of transcription from       | ---                                  | -1.17         | -1.10           | -1.05     | 1.05        | -1.02     | -1.02       | 1.14       | 1.12         | 1.24       | 1.15         | 1.13       | 1.19         |
| NCOR2               | nuclear receptor corepressor       | chr12q24             | negative regulation of transcription from       | ---                                  | -1.25         | -1.43           | -1.04     | -1.16       | 1.07      | -1.13       | -1.10      | -1.02        | -1.08      | 1.28         | 1.60       | 1.51         |
| NCRNA018            | non-protein coding RNA 18          | chrYq11.222          | 0                                               | ---                                  | 1.73          | -1.24           | -1.09     | -1.53       | -1.52     | -1.66       | -1.07      | 4.70         | 1.79       | 1.37         | 1.05       | -1.60        |
| NCSC1               | neuronal calcium sensor 1          | chr9q34              | regulation of neuron projection development     | ---                                  | 1.09          | -1.04           | 1.08      | 1.00        | 1.12      | 1.04        | -1.07      | -1.05        | -1.19      | -1.31        | -1.88      | -1.70        |
| NCSC1               | neuronal calcium sensor 1          | chr9q34              | regulation of neuron projection development     | ---                                  | 1.32          | 1.02            | 1.17      | 1.19        | -1.12     | -1.02       | 1.49       | 1.12         | 2.37       | 1.25         | 1.12       | 1.13         |
| ND2                 | MTND2                              | ---                  | mitochondrial electron transport, NADH          | Electron_Transport_Chain // GenMAPP  | -1.02         | -1.03           | -1.13     | -1.01       | -1.12     | -1.01       | -1.08      | -1.05        | -1.04      | 1.03         | -1.24      | -1.09        |
| ND3 /// SHK3        | NADH dehydrogenase, subunit        | chrXp22.1-p21.3      | mitochondrial electron transport, NADH          | Electron_Transport_Chain // GenMAPP  | -1.18         | -1.10           | -1.17     | -1.16       | -1.18     | -1.05       | -1.53      | -1.21        | -1.37      | -1.12        | -1.45      | -1.29        |
| NDC1                | NDC1 transmembrane protein         | chr1p32.3            | transport                                       | ---                                  | -1.08         | 1.03            | 1.03      | -1.07       | 1.19      | 1.02        | 1.25       | 1.13         | 1.40       | 1.32         | 1.91       | 1.77         |
| NDC1                | NDC1 transmembrane protein         | chr1p32.3            | transport                                       | ---                                  | 1.01          | 1.01            | 1.03      | -1.06       | -1.01     | 1.03        | -1.08      | -1.16        | -1.11      | -1.02        | -1.06      | -1.10        |
| NDE1                | nucleodominant extracellular       | chr16p13.11          | G2                                              | ---                                  | -1.46         | -1.31           | 1.01      | 1.03        | -1.37     | 1.01        | -1.06      | 1.53         | 1.27       | 1.10         | 1.07       | 1.26         |
| NDE1                | nucleodominant extracellular       | chr16p13.11          | G2                                              | ---                                  | -1.20         | -1.37           | 1.02      | -1.06       | -1.14     | -1.02       | -1.07      | 1.23         | 1.19       | 1.08         | 1.15       | 1.24         |
| NDEL1               | nucleodominant extracellular       | chr17p13.1           | M phase of mitotic cell cycle                   | ---                                  | -1.05         | -1.03           | 1.00      | -1.13       | 1.04      | 1.06        | -1.05      | 1.10         | 1.14       | 1.27         | 1.42       | 1.57         |
| NDFIP1              | Nedd4 family interacting protein   | chr5q31.3            | regulation of myeloid leukocyte differentiation | ---                                  | 1.07          | 1.05            | 1.02      | -1.04       | -1.09     | 1.06        | -1.10      | 1.03         | 1.09       | 1.31         | 1.41       | 1.28         |
| NDFIP1              | Nedd4 family interacting protein   | chr5q31.3            | regulation of myeloid leukocyte differentiation | ---                                  | -1.04         | -1.08           | -1.02     | 1.06        | -1.06     | 1.04        | -1.11      | -1.09        | -1.01      | 1.11         | -1.18      | -1.12        |
| NDFIP2              | Nedd4 family interacting protein   | chr13q31.1           | signal transduction                             | ---                                  | 1.36          | 1.21            | 1.04      | 1.06        | -1.13     | 1.09        | -1.15      | -1.09        | -1.30      | -1.24        | -1.29      | -1.68        |
| NDFIP2              | Nedd4 family interacting protein   | chr13q31.1           | signal transduction                             | ---                                  | 1.23          | 1.29            | -1.09     | -1.17       | -1.00     | 1.15        | -1.36      | -1.09        | -1.64      | -1.88        | -1.61      | -1.59        |
| NDNF                | neuron-derived neurotrophic factor | chr4q27              | neuron migration                                | ---                                  | -1.30         | 1.09            | -4.41     | -1.84       | -1.11     | 1.56        | -1.16      | 1.08         | 1.27       | 1.35         | 1.25       | 1.68         |
| NDNL2               | necdin-like 2                      | chr15q13.1           | DNA repair                                      | ---                                  | 1.15          | 1.12            | 1.01      | -1.07       | 1.19      | 1.07        | -1.27      | 1.10         | -1.38      | -1.27        | 1.03       | -1.23        |
| NDOR1               | NADPH dependent difflavin          | chr9q34.3            | cell death                                      | ---                                  | 1.21          | 1.21            | -1.65     | 1.08        | -1.28     | 1.00        | 1.32       | 1.10         | 1.26       | 1.11         | -1.48      | -1.78        |
| NDRG1               | N-myc downstream regulated         | chr8q24.3            | response to metal ion                           | ---                                  | -1.04         | -1.03           | 1.05      | 1.06        | -1.00     | -1.01       | 1.25       | 1.09         | 1.67       | 1.51         | 2.36       | 2.77         |
| NDRG2               | NDRG family member 2               | chr14q11.2           | negative regulation of cytokine production      | ---                                  | 1.03          | -1.79           | 1.13      | 1.03        | -1.20     | -1.12       | 1.06       | 1.03         | -3.32      | -2.51        | -3.07      | -2.01        |
| NDRG2               | NDRG family member 2               | chr14q11.2           | negative regulation of cytokine production      | ---                                  | 1.41          | 1.36            | -1.13     | -1.41       | -2.89     | -1.43       | -2.22      | -1.02        | 1.06       | -2.88        | -2.89      | 1.02         |
| NDRG3               | NDRG family member 3               | chr20q11.21-q11.23   | spermatogenesis                                 | ---                                  | 1.01          | -1.07           | -1.00     | -1.01       | 1.09      | 1.06        | 1.02       | 1.04         | -1.28      | -1.13        | -1.46      | -1.36        |
| NDRG3               | NDRG family member 3               | chr20q11.21-q11.23   | spermatogenesis                                 | ---                                  | -1.04         | -1.07           | 1.00      | 1.07        | 1.14      | 1.03        | 1.07       | 1.01         | -1.09      | 1.00         | -1.14      | -1.10        |
| NDST1               | N-deacetylase/N-sulfotransferase   | chr5q33.1            | MAPK cascade                                    | ---                                  | -1.09         | -1.03           | 1.05      | 1.20        | -1.06     | -1.04       | 1.22       | 1.06         | -1.26      | -1.44        | -1.68      | -1.34        |
| NDST4               | N-deacetylase/N-sulfotransferase   | chr4q26              | metabolic process                               | ---                                  | 1.15          | 1.32            | -1.02     | 1.14        | -1.04     | 1.41        | -1.33      | -1.36        | -4.93      | -2.70        | -7.18      | -3.34        |
| NDUFA10             | NADH dehydrogenase (ubiquinone)    | chr2q37.3            | mitochondrial electron transport, NADH          | Electron_Transport_Chain // GenMAPP  | 1.40          | 1.54            | 1.10      | 1.32        | -1.45     | -1.24       | 1.25       | 1.26         | -1.19      | -1.00        | -2.08      | -2.18        |
| NDUFA10             | NADH dehydrogenase (ubiquinone)    | chr2q37.3            | mitochondrial electron transport, NADH          | Electron_Transport_Chain // GenMAPP  | 1.44          | 1.32            | 1.11      | 1.33        | -1.81     | -1.38       | -1.00      | 1.11         | 6.72       | 5.04         | 6.64       | 6.31         |
| NDUFA10             | NADH dehydrogenase (ubiquinone)    | chr2q37.3            | mitochondrial electron transport, NADH          | ---                                  | 2.59          | 1.86            | -1.01     | 1.08        | -1.32     | -1.31       | -1.71      | -1.19        | -1.62      | -1.93        | -2.29      | -2.43        |
| NDUFA11             | NADH dehydrogenase (ubiquinol)     | chr19p13.3           | electron transport chain                        | ---                                  | 1.00          | -1.01           | 1.02      | 1.05        | 1.00      | -1.07       | 1.08       | 1.06         | 1.11       | -1.07        | -1.36      | -1.39        |
| NDUFA4              | NADH dehydrogenase (ubiquinone)    | chr7p21.3            | mitochondrial electron transport, NADH          | Electron_Transport_Chain // GenMAPP  | -1.13         | -1.04           | 1.03      | 1.09        | -1.04     | -1.15       | 1.04       | 1.33         | 1.11       | 1.06         | 1.05       | 1.05         |
| NDUFA4L2            | NADH dehydrogenase (ubiquinol)     | chr12q13.3           | 0                                               | ---                                  | 1.15          | 1.03            | -1.08     | -1.22       | 1.65      | -1.05       | 1.53       | 1.47         | 1.39       | 1.42         | 1.61       | 2.03         |
| NDUFA5              | NADH dehydrogenase (ubiquinol)     | chr7q31.33           | mitochondrial electron transport, NADH          | Electron_Transport_Chain // GenMAPP  | 1.22          | 1.26            | -1.20     | 1.22        | -1.20     | 1.03        | -1.38      | -1.06        | -1.41      | -1.12        | -1.30      | -1.05        |
| NDUFA6              | NADH dehydrogenase (ubiquinol)     | chr22q13.2           | mitochondrial electron transport, NADH          | Electron_Transport_Chain // GenMAPP  | -1.12         | -1.08           | -1.05     | -1.01       | -1.07     | -1.13       | 1.14       | 1.14         | 1.53       | 1.35         | 1.32       | 1.42         |
| NDUFA7              | NADH dehydrogenase (ubiquinol)     | chr19p13.2           | mitochondrial electron transport, NADH          | Electron_Transport_Chain // GenMAPP  | -1.02         | 1.12            | -1.32     | -1.51       | 1.13      | -1.06       | -1.36      | 1.06         | 1.01       | -1.16        | 1.47       | 1.63         |
| NDUFA7              | NADH dehydrogenase (ubiquinol)     | chr19p13.2           | mitochondrial electron transport, NADH          | Electron_Transport_Chain // GenMAPP  | -1.08         | -1.01           | 1.04      | 1.05        | -1.14     | -1.19       | 1.14       | 1.23         | 1.35       | 1.41         | 1.12       | 1.15         |
| NDUFA8              | NADH dehydrogenase (ubiquinol)     | chr16p12.2           | mitochondrial electron transport, NADH          | Electron_Transport_Chain // GenMAPP  | -1.06         | -1.03           | 1.02      | -1.00       | 1.05      | -1.03       | 1.02       | -1.05        | 1.34       | 1.18         | 1.27       | 1.21         |
| NDUFA1              | NADH dehydrogenase (ubiquinol)     | chr15q11.2-q21.3     | mitochondrial electron transport, NADH          | ---                                  | 1.04          | -1.02           | 1.06      | 1.02        | 1.04      | -1.01       | -1.13      | -1.04        | -1.07      | -1.11        | -1.03      | 1.11         |
| NDUFA2              | NADH dehydrogenase (ubiquinol)     | chr5q12.1            | 0                                               | ---                                  | -1.05         | -1.07           | 1.03      | 1.12        | -1.08     | -1.06       | 1.17       | 1.34         | 1.76       | 1.47         | 1.25       | 1.26         |
| NDUFA4              | NADH dehydrogenase (ubiquinol)     | chr6q16.1            | mitochondrial respiratory chain complex         | ---                                  | 1.17          | 1.16            | -1.05     | -1.08       | -1.01     | 1.05        | -1.08      | -1.06        | -1.09      | -1.06        | 1.24       | 1.07         |
| NDUFA4              | NADH dehydrogenase (ubiquinol)     | chr6q16.1            | mitochondrial respiratory chain complex         | ---                                  | 1.09          | 1.03            | 1.11      | 1.12        | 1.05      | 1.20        | -1.79      | -1.40        | -1.29      | -1.50        | -1.67      | -1.67        |
| NDUFB1              | NADH dehydrogenase (ubiquinol)     | chr14q32.12          | mitochondrial electron transport, NADH          | Electron_Transport_Chain // GenMAPP  | -1.07         | 1.03            | 1.00      | 1.03        | -1.05     | -1.08       | -1.03      | -1.03        | 1.09       | 1.06         | -1.28      | -1.32        |
| NDUFB2              | NADH dehydrogenase (ubiquinol)     | chr7q34              | mitochondrial electron transport, NADH          | Electron_Transport_Chain // GenMAPP  | -1.15         | -1.26           | -1.27     | 1.10        | -1.00     | -1.27       | 1.12       | 1.12         | 1.53       | 1.21         | -1.35      | -1.21        |
| NDUFB2              | NADH dehydrogenase (ubiquinol)     | chr7q34              | mitochondrial electron transport, NADH          | Electron_Transport_Chain // GenMAPP  | -1.19         | -1.23           | 1.07      | 1.03        | 1.25      | 1.21        | -1.14      | 1.05         | -1.41      | -1.07        | -1.67      | -2.14        |
| NDUFB2-AS           | NDUFB2 antisense RNA 1             | chr7q34              | 0                                               | ---                                  | -1.00         | 1.06            | 1.05      | -1.12       | 1.12      | 1.09        | 1.06       | 1.17         | -1.98      | -1.69        | -1.70      | -1.65        |
| NDUFB6              | NADH dehydrogenase (ubiquinol)     | chr9p21.1            | mitochondrial electron transport, NADH          | Electron_Transport_Chain // GenMAPP  | 1.03          | -1.05           | -1.02     | -1.07       | -1.03     | 1.02        | -1.12      | -1.13        | -1.06      | -1.09        | -1.10      | -1.17        |
| NDUFC1              | NADH dehydrogenase (ubiquinol)     | chr4q31.1            | mitochondrial electron transport, NADH          | Electron_Transport_Chain // GenMAPP  | 1.16          | 1.01            | 1.14      | 1.19        | -1.36     | -1.20       | -1.57      | -1.29        | -1.23      | -1.72        | 1.40       | 1.73         |
| NDUFC1              | NADH dehydrogenase (ubiquinol)     | chr4q31.1            | mitochondrial electron transport, NADH          | Electron_Transport_Chain // GenMAPP  | -1.09         | -1.09           | -1.05     | -1.01       | 1.03      | -1.05       | -1.01      | 1.02         | 1.39       | 1.41         | 1.25       | 1.34         |
| NDUFC2 /// NDUFC2-1 | NADH dehydrogenase (ubiquinol)     | chr11q14.1           | mitochondrial electron transport, NADH          | Electron_Transport_Chain // GenMAPP  | -1.12         | -1.02           | -1.20     | -1.18       | -1.10     | 1.01        | -1.41      | -1.31        | -1.26      | -1.06        | -1.19      | -1.19        |
| NDUFC2 /// NDUFC2-1 | NADH dehydrogenase (ubiquinol)     | chr11q14.1           | mitochondrial electron transport, NADH          | Electron_Transport_Chain // GenMAPP  | -1.11         | 1.17            | 1.06      | -1.10       | 1.08      | 1.17        | -1.48      | -1.24        | -1.53      | -1.47        | -2.00      | -1.70        |

| ID      | Gene Title                                           | Chromosomal Location     | 1st Gene Ontology Biological Process                                 | Pathway                             | A2497 30 mins | A2497P' 30 mins | A2497 2 h | A2497P' 2 h | A2497 4 h | A2497P' 4 h | A2497 24 h | A2497P' 24 h | A2497 48 h | A2497P' 48 h | A2497 72 h | A2497P' 72 h |
|---------|------------------------------------------------------|--------------------------|----------------------------------------------------------------------|-------------------------------------|---------------|-----------------|-----------|-------------|-----------|-------------|------------|--------------|------------|--------------|------------|--------------|
| NDUFS1  | NADH dehydrogenase (ubiquinone)                      | chr2q33-q34              | mitochondrial electron transport, NADH dehydrogenase complex         | Electron_Transport_Chain // GenMAPP | 1.13          | -1.01           | 1.11      | 1.15        | -1.04     | 1.06        | -1.04      | 1.03         | -1.43      | -1.29        | -2.34      | -1.92        |
| NDUFS1  | NADH dehydrogenase (ubiquinone)                      | chr2q33-q34              | mitochondrial electron transport, NADH dehydrogenase complex         | Electron_Transport_Chain // GenMAPP | -1.12         | -1.40           | -1.27     | -1.51       | -1.12     | -1.13       | -1.19      | -1.18        | -1.39      | -1.17        | -1.48      | -1.53        |
| NDUFS1  | NADH dehydrogenase (ubiquinone)                      | chr2q33-q34              | mitochondrial electron transport, NADH dehydrogenase complex         | Electron_Transport_Chain // GenMAPP | -1.42         | -1.21           | 1.48      | 1.37        | 3.06      | 2.58        | 1.17       | 1.40         | -1.70      | 1.11         | -2.23      | -1.56        |
| NDUFS3  | NADH dehydrogenase (ubiquinone)                      | chr1p11.11 // chr1p11.22 | mitochondrial electron transport, NADH dehydrogenase complex         | Electron_Transport_Chain // GenMAPP | -1.11         | -1.08           | -1.07     | -1.07       | -1.11     | -1.05       | 1.09       | -1.01        | 1.07       | 1.23         | 1.17       | 1.20         |
| NDUFS4  | NADH dehydrogenase (ubiquinone)                      | chr5q11.1                | regulation of protein phosphorylation                                | Electron_Transport_Chain // GenMAPP | 1.87          | 1.52            | 1.06      | 1.30        | 1.66      | 1.50        | -1.11      | 1.05         | -2.20      | -2.36        | -2.74      | -2.41        |
| NDUFS7  | NADH dehydrogenase (ubiquinone)                      | chr19p13.3               | mitochondrial electron transport, NADH dehydrogenase complex         | Electron_Transport_Chain // GenMAPP | -1.04         | -1.08           | 1.00      | -1.08       | 1.06      | -1.03       | 1.11       | 1.10         | 1.39       | 1.29         | 1.58       | 1.62         |
| NDUFV2  | NADH dehydrogenase (ubiquinone)                      | chr18p11.22              | mitochondrial electron transport, NADH dehydrogenase complex         | Electron_Transport_Chain // GenMAPP | -1.05         | 1.00            | -1.05     | 1.06        | -1.05     | -1.02       | 1.09       | 1.08         | 1.15       | -1.05        | -1.07      | -1.07        |
| NDUFV3  | NADH dehydrogenase (ubiquinone)                      | chr21q22.3               | mitochondrial electron transport, NADH dehydrogenase complex         | Electron_Transport_Chain // GenMAPP | -1.09         | -1.08           | -1.01     | 1.05        | -1.00     | -1.03       | 1.14       | 1.13         | 1.65       | 1.64         | 1.46       | 1.64         |
| NDUFV3  | NADH dehydrogenase (ubiquinone)                      | chr21q22.3               | mitochondrial electron transport, NADH dehydrogenase complex         | Electron_Transport_Chain // GenMAPP | -1.13         | -1.19           | 1.02      | 1.06        | 1.03      | 1.09        | -1.07      | 1.03         | -1.44      | -1.50        | -1.26      | -1.14        |
| NEBL    | nebulin                                              | chr10p12                 | cardiac muscle thin filament assembly                                | ---                                 | -1.26         | -1.21           | 1.18      | 1.17        | -1.17     | 1.11        | -1.08      | -1.19        | -1.44      | -1.22        | -3.11      | -1.63        |
| NEBL    | nebulin                                              | chr10p12                 | cardiac muscle thin filament assembly                                | ---                                 | -1.19         | -1.03           | 1.04      | 1.13        | 1.05      | 1.35        | -1.04      | -1.10        | -1.88      | -1.21        | -2.49      | -1.63        |
| NEBL    | nebulin                                              | chr10p12                 | cardiac muscle thin filament assembly                                | ---                                 | -1.12         | -1.03           | 1.18      | -1.39       | 1.04      | -1.43       | 1.72       | 1.71         | 1.37       | 1.55         | -1.08      | 1.35         |
| NECAB2  | N-terminal EF-hand calcium-binding domain protein    | chr16q23.3               | signal transduction                                                  | ---                                 | -1.97         | -1.01           | 3.43      | 4.04        | -1.56     | 1.44        | 2.11       | 2.27         | 7.06       | 5.67         | 3.47       | 3.62         |
| NECAP2  | NECAP endocytosis associated protein                 | chr1p36.13               | transport                                                            | ---                                 | -1.00         | 1.09            | -1.12     | -1.15       | 1.15      | -1.00       | 1.28       | 1.26         | 2.89       | 1.72         | 2.37       | 1.56         |
| NECAP2  | NECAP endocytosis associated protein                 | chr1p36.13               | transport                                                            | ---                                 | 1.02          | 1.02            | 1.03      | -1.08       | 1.03      | 1.08        | 1.17       | 1.03         | 1.12       | -1.00        | 1.19       | 1.20         |
| NEDD1   | neural precursor cell expressed, highly glycosylated | chr12q23.1               | G2                                                                   | ---                                 | -1.28         | 1.07            | -1.21     | -1.39       | 1.00      | 1.21        | -1.28      | -1.59        | 1.22       | 1.40         | 1.73       | 1.46         |
| NEDD4L  | neural precursor cell expressed, highly glycosylated | chr18q21                 | negative regulation of transcription from RNA polymerase II promoter | ---                                 | 1.02          | -1.06           | 1.13      | 1.12        | 1.09      | -1.04       | 1.58       | 1.21         | 2.31       | 1.98         | 2.46       | 2.37         |
| NEDD4L  | neural precursor cell expressed, highly glycosylated | chr18q21                 | negative regulation of transcription from RNA polymerase II promoter | ---                                 | 1.18          | -1.01           | 1.07      | 1.14        | -1.64     | -1.03       | 1.47       | 1.49         | 1.42       | 1.42         | 1.22       | 1.21         |
| NEDD4L  | neural precursor cell expressed, highly glycosylated | chr18q21                 | negative regulation of transcription from RNA polymerase II promoter | ---                                 | -1.06         | -1.03           | 1.05      | -1.10       | -1.03     | -1.06       | -1.21      | -1.05        | -1.18      | -1.14        | -1.37      | -1.41        |
| NEDD4L  | neural precursor cell expressed, highly glycosylated | chr18q21                 | negative regulation of transcription from RNA polymerase II promoter | ---                                 | 1.33          | 1.13            | 1.07      | 1.08        | 1.04      | 1.27        | -1.70      | -1.45        | -1.29      | -1.27        | -1.50      | -1.49        |
| NEDD9   | neural precursor cell expressed, highly glycosylated | chr6p25-p24              | cytoskeleton organization                                            | ---                                 | 1.04          | 1.05            | -1.03     | 1.24        | 1.08      | -1.08       | 1.84       | 1.63         | 2.23       | 1.44         | 3.22       | 3.00         |
| NEDD9   | neural precursor cell expressed, highly glycosylated | chr6p25-p24              | cytoskeleton organization                                            | ---                                 | 1.33          | 1.56            | 1.06      | 1.10        | -1.33     | -1.01       | 2.48       | 1.64         | -1.17      | -1.13        | 1.81       | 1.41         |
| NEDD9   | neural precursor cell expressed, highly glycosylated | chr6p25-p24              | cytoskeleton organization                                            | ---                                 | 1.82          | 2.07            | 1.13      | -1.23       | -1.31     | -1.02       | -1.65      | -1.67        | -1.12      | 2.25         | 4.62       | 2.89         |
| NEFH    | neurofilament, heavy polypeptide                     | chr22q12.2               | microtubule cytoskeleton organization                                | ---                                 | 1.03          | -1.05           | 1.01      | 1.12        | 1.00      | 1.06        | -1.33      | -1.14        | -1.60      | -1.58        | -1.87      | -1.52        |
| NEFH    | neurofilament, heavy polypeptide                     | chr22q12.2               | microtubule cytoskeleton organization                                | ---                                 | -1.10         | -1.09           | -1.06     | 1.07        | 1.02      | -1.08       | 1.00       | 1.14         | -1.29      | -1.50        | -1.68      | -1.49        |
| NEFL    | neurofilament, light polypeptide                     | chr8p21                  | synaptic transmission                                                | ---                                 | 1.20          | 1.21            | -1.14     | -1.71       | 1.99      | 1.25        | -1.19      | -1.29        | 3.10       | 4.80         | -1.10      | -1.21        |
| NEFL    | neurofilament, light polypeptide                     | chr8p21                  | synaptic transmission                                                | ---                                 | 1.10          | -1.73           | 1.43      | 1.38        | -1.06     | 1.04        | 2.53       | 2.45         | -1.10      | -1.55        | 1.67       | -1.17        |
| NEFM    | neurofilament, medium polypeptide                    | chr8p21                  | microtubule cytoskeleton organization                                | ---                                 | -2.96         | 1.28            | -6.33     | -3.26       | -1.18     | -1.73       | -1.33      | 1.33         | 4.21       | 2.14         | -3.01      | -1.49        |
| NEGR1   | neuronal growth regulator                            | chr1p31.1                | cell adhesion                                                        | ---                                 | 1.13          | -1.18           | 1.36      | 1.12        | -1.84     | -1.18       | -1.19      | -1.26        | -1.39      | 1.44         | -2.41      | -1.77        |
| NEGR1   | neuronal growth regulator                            | chr1p31.1                | cell adhesion                                                        | ---                                 | 1.02          | 1.23            | 1.04      | -1.12       | 1.17      | 1.20        | 1.10       | 1.10         | -1.25      | 1.03         | -1.69      | -1.84        |
| NEGR1   | neuronal growth regulator                            | chr1p31.1                | cell adhesion                                                        | ---                                 | 1.33          | 1.12            | 1.00      | -1.04       | -1.09     | 1.26        | -1.13      | 1.16         | -1.46      | -1.02        | -1.63      | -1.70        |
| NEIL2   | neutrophil elastase-like                             | chr8p23.1                | DNA repair                                                           | ---                                 | 1.07          | -1.01           | 1.02      | 1.01        | -1.01     | -1.01       | -1.03      | -1.14        | 1.17       | 1.26         | 1.25       | 1.22         |
| NEK1    | NIMA-related kinase 1                                | chr4q33                  | protein phosphorylation                                              | ---                                 | -1.00         | -1.07           | 1.09      | -1.01       | 1.03      | 1.01        | -1.28      | -1.01        | -1.36      | -1.45        | -1.38      | -1.36        |
| NEK1    | NIMA-related kinase 1                                | chr4q33                  | protein phosphorylation                                              | ---                                 | 1.01          | 1.01            | 1.06      | -1.07       | -1.07     | -1.09       | -1.04      | -1.01        | -2.19      | -2.16        | -2.12      | -2.37        |
| NEK1    | NIMA-related kinase 1                                | chr4q33                  | protein phosphorylation                                              | ---                                 | 1.11          | 1.14            | 1.07      | -1.17       | -1.09     | -1.10       | -1.04      | -1.03        | -1.46      | -1.48        | -1.43      | -1.33        |
| NEK11   | NIMA-related kinase 11                               | chr3q22.1                | protein phosphorylation                                              | ---                                 | -1.33         | -1.32           | -1.01     | -1.17       | 1.45      | -1.28       | -1.23      | -1.18        | -2.69      | -2.60        | -1.00      | -1.00        |
| NEK2    | NIMA-related kinase 2                                | chr1q32.2-q41            | mitotic sister chromatid segregation                                 | ---                                 | -1.07         | -1.04           | 1.11      | -1.04       | -1.07     | 1.13        | -1.16      | -1.23        | 1.19       | 1.30         | 1.37       | 1.22         |
| NEK3    | NIMA-related kinase 3                                | chr13q14.13              | protein phosphorylation                                              | ---                                 | -1.07         | 1.15            | -1.00     | -1.17       | 1.07      | -1.07       | 1.05       | 1.13         | 1.02       | -1.34        | -1.46      | -1.46        |
| NEK4    | NIMA-related kinase 4                                | chr3p21.1                | protein phosphorylation                                              | ---                                 | 1.04          | -1.09           | -1.13     | -1.20       | -1.14     | 1.01        | -1.29      | -1.13        | -1.85      | -1.62        | -1.57      | -1.90        |
| NEK6    | NIMA-related kinase 6                                | chr9q33.3-q34.11         | mitotic cell cycle                                                   | ---                                 | -1.31         | -1.24           | -1.00     | -1.36       | 1.02      | 1.01        | -1.21      | 1.33         | 1.66       | 1.70         | 1.22       | 1.63         |
| NEK6    | NIMA-related kinase 6                                | chr9q33.3-q34.11         | mitotic cell cycle                                                   | ---                                 | 1.20          | 1.27            | 1.06      | -1.23       | -1.19     | 1.17        | 1.61       | 1.03         | 3.61       | 3.39         | 2.27       | 3.03         |
| NEK6    | NIMA-related kinase 6                                | chr9q33.3-q34.11         | mitotic cell cycle                                                   | ---                                 | 1.03          | 1.07            | 1.07      | 1.15        | 1.07      | -1.11       | 1.54       | 1.28         | 3.04       | 2.71         | 2.30       | 2.61         |
| NEK9    | NIMA-related kinase 9                                | chr14q24.3               | mitotic cell cycle                                                   | ---                                 | 1.23          | 1.18            | 1.03      | 1.00        | 1.10      | 1.07        | -1.14      | -1.24        | -1.48      | -1.52        | -1.28      | -1.54        |
| NELFB   | negative elongation factor                           | chr9q34                  | transcription, DNA-dependent                                         | ---                                 | 1.05          | 1.01            | -1.07     | 1.07        | -1.05     | -1.08       | 1.23       | 1.22         | 1.57       | 1.26         | 1.22       | 1.31         |
| NELFCD  | negative elongation factor                           | chr20q13                 | transcription, DNA-dependent                                         | ---                                 | -1.09         | -1.05           | -1.02     | -1.02       | 1.04      | -1.04       | 1.05       | 1.00         | -1.18      | -1.15        | -1.23      | -1.19        |
| NELFCD  | negative elongation factor                           | chr20q13                 | transcription, DNA-dependent                                         | ---                                 | -1.07         | -1.03           | -1.01     | 1.03        | 1.09      | -1.07       | 1.13       | 1.11         | -1.14      | -1.23        | -1.22      | -1.28        |
| NELFCD  | negative elongation factor                           | chr20q13                 | transcription, DNA-dependent                                         | ---                                 | -1.03         | -1.05           | 1.02      | 1.03        | 1.10      | 1.03        | 1.04       | -1.02        | -1.19      | -1.18        | -1.21      | -1.22        |
| NELFCD  | negative elongation factor                           | chr20q13                 | transcription, DNA-dependent                                         | ---                                 | -1.13         | -1.06           | 1.01      | -1.01       | 1.01      | -1.10       | 1.08       | 1.05         | -1.14      | -1.12        | -1.32      | -1.23        |
| NELL1   | NEL-like 1 (chicken)                                 | chr11p15.1               | induction of apoptosis                                               | ---                                 | -2.66         | -1.36           | 1.61      | 2.58        | 2.14      | 1.72        | -2.37      | -1.05        | 1.21       | -1.13        | 2.40       | 2.83         |
| NEMF    | nuclear export mediator factor                       | chr14q22                 | flagellum assembly                                                   | ---                                 | 1.03          | -1.11           | -1.07     | 1.21        | 1.02      | 1.18        | -1.05      | -1.02        | -1.21      | -1.06        | -1.50      | -1.17        |
| NEMF    | nuclear export mediator factor                       | chr14q22                 | flagellum assembly                                                   | ---                                 | -1.06         | -1.07           | 1.08      | 1.12        | 1.11      | 1.03        | 1.10       | 1.05         | -1.18      | -1.12        | -1.39      | -1.34        |
| NEMF    | nuclear export mediator factor                       | chr14q22                 | flagellum assembly                                                   | ---                                 | 1.22          | 1.10            | -1.08     | 1.11        | -1.04     | -1.15       | -1.23      | -1.07        | -1.14      | 1.06         | -1.35      | -1.45        |
| NEO1    | neogenin 1                                           | chr15q22.3-q23           | regulation of transcription, DNA-dependent                           | ---                                 | -1.09         | -1.60           | -1.24     | -1.34       | -1.04     | -1.10       | 1.94       | 2.87         | -4.28      | -2.09        | -1.77      | -3.55        |
| NETO1   | neuropilin (NRP) and tolloid-like receptor           | chr18q22.2               | memory                                                               | ---                                 | -2.41         | -1.35           | 3.18      | 4.77        | -2.08     | 2.34        | -1.17      | 2.09         | 5.69       | 9.10         | 2.26       | 1.54         |
| NETO2   | neuropilin (NRP) and tolloid-like receptor           | chr16q11                 | 0                                                                    | ---                                 | 1.28          | 1.17            | -1.02     | -1.10       | 1.06      | 1.07        | -1.37      | -1.09        | -1.70      | -1.72        | -1.42      | -1.87        |
| NETO2   | neuropilin (NRP) and tolloid-like receptor           | chr16q11                 | 0                                                                    | ---                                 | -1.08         | -1.08           | 1.03      | 1.03        | 1.04      | -1.01       | 1.01       | -1.03        | 1.22       | 1.18         | 1.15       | 1.24         |
| NEU1    | sialidase 1 (lysosomal sialidase)                    | chr6p21.3                | phospholipid metabolic process                                       | ---                                 | -1.14         | -1.14           | 1.06      | -1.05       | 1.12      | -1.02       | 1.11       | 1.13         | 1.10       | 1.26         | 2.25       | 2.27         |
| NEURL2  | neuronalized homolog 2 (Drosophila)                  | chr20q13.12              | protein ubiquitination                                               | ---                                 | -1.18         | -1.65           | 1.18      | 1.05        | 1.05      | -1.53       | -1.07      | -1.15        | -1.75      | -1.91        | -2.57      | -2.61        |
| NEUROD1 | neuronal differentiation 1                           | chr2q32                  | pancreatic A cell fate commitment                                    | ---                                 | -1.83         | -4.08           | 1.09      | 1.73        | 3.79      | 5.21        | -2.03      | -1.99        | -1.37      | -8.22        | 12.41      | 13.20        |
| NEXN    | nexilin (F-actin binding protein)                    | chr1p31.1                | regulation of cell migration                                         | ---                                 | -1.12         | -1.05           | 1.04      | -1.27       | 1.03      | 1.13        | 1.18       | 1.19         | -3.46      | -2.58        | -1.18      | -1.59        |
| NEXN    | nexilin (F-actin binding protein)                    | chr1p31.1                | regulation of cell migration                                         | ---                                 | 1.35          | 1.11            | 1.11      | -1.13       | 1.03      | 1.03        | -1.33      | -1.03        | -3.54      | -3.74        | -1.80      | -5.43        |
| NF1     | neurofibromin 1                                      | chr17q11.2               | MAPK cascade                                                         | ---                                 | 1.28          | 1.28            | 1.02      | 1.17        | -1.28     | -1.12       | 2.35       | 1.64         | 5.03       | 3.93         | 3.33       | 2.79         |
| NF1     | neurofibromin 1                                      | chr17q11.2               | MAPK cascade                                                         | ---                                 | -1.12         | -1.03           | -1.10     | -1.13       | -1.12     | 1.11        | -1.14      | 1.06         | -1.35      | -1.08        | -1.20      | -1.48        |
| NF1     | neurofibromin 1                                      | chr17q11.2               | MAPK cascade                                                         | ---                                 | 1.24          | 1.21            | 1.02      | -1.22       | 1.03      | 1.06        | 1.03       | -1.02        | -1.88      | -1.55        | -1.19      | -1.25        |
| NF1     | neurofibromin 1                                      | chr17q11.2               | MAPK cascade                                                         | ---                                 | 1.02          | -1.17           | 1.38      | 1.24        | -1.11     | 1.45        | 2.28       | 1.87         | 6.02       | 6.18         | 5.68       | 4.52         |
| NF2     | neurofibromin 2 (merlin)                             | chr22q12.2               | mesoderm formation                                                   | ---                                 | -1.00         | 1.04            | 1.03      | -1.01       | 1.02      | 1.03        | 1.03       | 1.07         | 1.02       | -1.01        | -1.14      | -1.21        |

| ID       | Gene Title                                                                            | Chromosomal Location | 1st Gene Ontology Biological Process                                 | Pathway                                  | A2497 30 mins | A2497P' 30 mins | A2497 2 h | A2497P' 2 h | A2497 4 h | A2497P' 4 h | A2497 24 h | A2497P' 24 h | A2497 48 h | A2497P' 48 h | A2497 72 h | A2497P' 72 h |
|----------|---------------------------------------------------------------------------------------|----------------------|----------------------------------------------------------------------|------------------------------------------|---------------|-----------------|-----------|-------------|-----------|-------------|------------|--------------|------------|--------------|------------|--------------|
| NF2      | neurofibromin 2 (merlin)                                                              | chr22q12.2           | mesoderm formation                                                   | ---                                      | -1.11         | -1.03           | 1.08      | 1.08        | -1.05     | -1.07       | 1.02       | 1.10         | 1.65       | 1.33         | -1.07      | -1.05        |
| NFATC1   | nuclear factor of activated T cells 1                                                 | chr18q23             | G1                                                                   | ---                                      | 1.13          | 1.02            | -1.03     | 1.00        | 1.14      | -1.05       | 1.31       | 1.06         | 1.14       | 1.00         | 1.50       | 1.97         |
| NFATC2   | nuclear factor of activated T cells 2                                                 | chr18q23             | G1                                                                   | ---                                      | 1.23          | 1.33            | 1.29      | 1.41        | 1.17      | 1.02        | 1.65       | 1.16         | 2.75       | 2.10         | -1.13      | 1.08         |
| NFATC1   | nuclear factor of activated T cells 1                                                 | chr20q13.2           | cytokine production                                                  | ---                                      | -1.12         | -1.12           | -1.24     | -1.29       | -1.19     | -1.14       | -1.04      | -1.04        | -3.08      | -2.27        | -4.68      | -4.67        |
| NFATC2   | nuclear factor of activated T cells 2                                                 | chr20q13.2           | cytokine production                                                  | ---                                      | -1.21         | 1.31            | 1.12      | 1.12        | -1.03     | -1.03       | 1.19       | 1.32         | -3.16      | -3.73        | -4.97      | -15.16       |
| NFATC2IP | nuclear factor of activated T cells 2 interacting protein                             | chr16p11.2           | cytokine production                                                  | ---                                      | 1.08          | 1.05            | 1.09      | 1.06        | 1.09      | 1.16        | -1.01      | 1.02         | -1.29      | -1.29        | -1.40      | -1.17        |
| NFATC3   | nuclear factor of activated T cells 3                                                 | chr16q22.2           | patterning of blood vessels                                          | ---                                      | 1.05          | -1.06           | 1.21      | 1.05        | 1.03      | -1.01       | -1.11      | -1.13        | -1.16      | -1.44        | -1.21      | -1.29        |
| NFATC3   | nuclear factor of activated T cells 3                                                 | chr16q22.2           | patterning of blood vessels                                          | ---                                      | -1.05         | -1.08           | 1.05      | -1.04       | 1.07      | -1.02       | 1.00       | -1.04        | -1.45      | -1.36        | -1.13      | -1.05        |
| NFATC3   | nuclear factor of activated T cells 3                                                 | chr16q22.2           | patterning of blood vessels                                          | ---                                      | -1.02         | -1.05           | -1.00     | 1.00        | 1.04      | 1.05        | -1.05      | -1.02        | -1.36      | -1.34        | -1.24      | -1.25        |
| NFE2     | nuclear factor (erythroid-derived 2) 1                                                | chr12q13             | nucleosome disassembly                                               | ---                                      | -1.57         | -1.10           | 1.29      | 3.34        | -1.22     | -2.77       | -1.42      | 1.20         | 2.67       | 2.40         | 1.43       | 1.81         |
| NFE2L1   | nuclear factor (erythroid-derived 2-like) 1                                           | chr17q21.3           | transcription, DNA-dependent                                         | ---                                      | -1.06         | 1.06            | 1.11      | 1.05        | 1.24      | 1.06        | 1.27       | 1.05         | 1.60       | 1.26         | 1.47       | 1.38         |
| NFE2L1   | nuclear factor (erythroid-derived 2-like) 1                                           | chr17q21.3           | transcription, DNA-dependent                                         | ---                                      | 1.08          | 1.11            | 1.06      | -1.05       | 1.12      | -1.02       | 1.14       | 1.07         | 1.65       | 1.24         | 1.38       | 1.22         |
| NFE2L1   | nuclear factor (erythroid-derived 2-like) 1                                           | chr17q21.3           | transcription, DNA-dependent                                         | ---                                      | 1.00          | 1.05            | -1.04     | 1.04        | 1.10      | -1.07       | 1.06       | -1.00        | 1.45       | 1.38         | 1.29       | 1.32         |
| NFE2L3   | nuclear factor (erythroid-derived 2-like) 3                                           | chr7p15.2            | transcription, DNA-dependent                                         | ---                                      | 1.03          | 1.27            | -1.25     | -1.65       | -1.08     | -1.11       | 1.07       | -1.01        | 2.15       | 1.70         | 1.76       | 1.41         |
| NFE2L3   | nuclear factor (erythroid-derived 2-like) 3                                           | chr7p15.2            | transcription, DNA-dependent                                         | ---                                      | 2.37          | -2.27           | 2.64      | 2.52        | 1.24      | -2.14       | -1.22      | 1.92         | -1.49      | -1.17        | 1.83       | 1.22         |
| NFIA     | nuclear factor I/A                                                                    | chr1p31.3-p31.2      | DNA replication                                                      | ---                                      | 1.24          | 1.50            | 1.23      | 1.04        | -1.48     | -1.08       | -1.25      | -1.66        | -1.09      | -1.97        | -2.51      | ---          |
| NFIA     | nuclear factor I/A                                                                    | chr1p31.3-p31.2      | DNA replication                                                      | ---                                      | 1.03          | 1.10            | 1.11      | -1.15       | -1.00     | 1.19        | -1.30      | 1.09         | -2.02      | -1.52        | -1.55      | -1.69        |
| NFIA     | nuclear factor I/A                                                                    | chr1p31.3-p31.2      | DNA replication                                                      | ---                                      | 1.05          | 1.07            | -1.01     | -1.14       | -1.02     | 1.03        | -1.29      | -1.15        | -1.52      | -1.31        | -1.70      | -1.78        |
| NFIA     | nuclear factor I/A                                                                    | chr1p31.3-p31.2      | DNA replication                                                      | ---                                      | 1.05          | 1.01            | -1.20     | -1.06       | 1.13      | 1.31        | 1.14       | 1.03         | -1.50      | -1.12        | -2.24      | -1.90        |
| NFIA     | nuclear factor I/A                                                                    | chr1p31.3-p31.2      | DNA replication                                                      | ---                                      | -1.15         | 1.00            | -1.10     | -1.23       | 1.00      | -1.02       | -1.00      | -1.10        | -1.26      | -1.26        | -1.22      | -1.41        |
| NFIA     | nuclear factor I/A                                                                    | chr1p31.3-p31.2      | DNA replication                                                      | ---                                      | -1.03         | 1.02            | -1.16     | -1.08       | -1.02     | 1.13        | -1.27      | -1.21        | -1.56      | -1.19        | -1.69      | -1.65        |
| NFIC     | nuclear factor I/C (CCAAT binding protein 1)                                          | chr19p13.3           | negative regulation of transcription from RNA polymerase II promoter | ---                                      | 1.09          | 1.01            | 1.12      | 1.02        | -1.03     | -1.02       | 1.13       | 1.02         | 1.10       | -1.01        | 1.39       | 1.28         |
| NFIC     | nuclear factor I/C (CCAAT binding protein 1)                                          | chr19p13.3           | negative regulation of transcription from RNA polymerase II promoter | ---                                      | -1.01         | -1.14           | -1.05     | 1.07        | 1.03      | 1.06        | 1.02       | -1.01        | 1.33       | 1.24         | 1.17       | 1.20         |
| NFIL3    | nuclear factor, interleukin-3 dependent                                               | chr9q22              | negative regulation of transcription from RNA polymerase II promoter | ---                                      | 1.10          | 1.10            | -1.01     | 1.03        | 1.10      | 1.00        | 1.41       | 1.05         | 2.15       | 2.08         | 2.03       | 1.87         |
| NFKB1    | nuclear factor of kappa light chain gene immunoglobulin receptor complex 1            | chr4q24              | negative regulation of transcription from RNA polymerase II promoter | Apoptosis // GenMAPP /// Apoptosis, GenM | -1.02         | 1.06            | 1.09      | -1.11       | 1.08      | 1.08        | 1.20       | -1.01        | 1.07       | -1.13        | 1.44       | 1.24         |
| NFKB2    | nuclear factor of kappa light chain gene immunoglobulin receptor complex 2            | chr10q24             | toll-like receptor signaling pathway                                 | ---                                      | -1.72         | -1.67           | 1.01      | 1.17        | 1.11      | -1.05       | 2.12       | 1.34         | 3.24       | 2.97         | 1.85       | 1.86         |
| NFKB2    | nuclear factor of kappa light chain gene immunoglobulin receptor complex 2            | chr10q24             | toll-like receptor signaling pathway                                 | ---                                      | 1.03          | 1.25            | -1.19     | -1.03       | 1.08      | -1.00       | 1.17       | 1.35         | 1.89       | 1.66         | 1.50       | 1.80         |
| NFKBIA   | nuclear factor of kappa light chain gene immunoglobulin receptor complex 1 associated | chr14q13             | protein import into nucleus, translocation                           | Apoptosis // GenMAPP /// Apoptosis, GenM | 1.07          | 1.05            | -1.04     | 1.08        | 1.13      | -1.03       | 1.76       | 1.31         | 2.12       | 1.65         | 2.18       | 1.79         |
| NFKBIA   | nuclear factor of kappa light chain gene immunoglobulin receptor complex 1 associated | chr14q13             | protein import into nucleus, translocation                           | ---                                      | 1.07          | 1.10            | 1.48      | 1.30        | 1.22      | 1.23        | 2.03       | 1.72         | 1.92       | 1.34         | 1.46       | 1.47         |
| NFKBIB   | nuclear factor of kappa light chain gene immunoglobulin receptor complex 1 associated | chr19q13.1           | toll-like receptor signaling pathway                                 | Apoptosis // GenMAPP                     | 1.10          | 1.09            | -1.06     | -1.14       | -1.08     | -1.13       | 1.16       | 1.04         | 2.04       | 1.19         | 1.81       | 1.55         |
| NFKBIB   | nuclear factor of kappa light chain gene immunoglobulin receptor complex 1 associated | chr19q13.1           | toll-like receptor signaling pathway                                 | Apoptosis // GenMAPP                     | 1.03          | -1.31           | -1.04     | 1.15        | 1.03      | -1.13       | -1.01      | 1.06         | 1.66       | 1.14         | 1.78       | 1.66         |
| NFKBIB   | nuclear factor of kappa light chain gene immunoglobulin receptor complex 1 associated | chr19q13.1           | toll-like receptor signaling pathway                                 | Apoptosis // GenMAPP                     | -1.28         | -1.12           | 1.31      | 1.22        | -1.04     | 1.13        | 1.07       | 1.23         | 1.89       | 1.27         | 1.43       | 1.43         |
| NFKBIE   | nuclear factor of kappa light chain gene immunoglobulin receptor complex 1 associated | chr6p21.1            | D-serine transport                                                   | Apoptosis // GenMAPP                     | 1.05          | -1.02           | 1.04      | 1.36        | 1.21      | 1.02        | 1.40       | 1.39         | 4.50       | 2.88         | 2.37       | 2.09         |
| NFKBIL1  | nuclear factor of kappa light chain gene immunoglobulin receptor complex 1 associated | chr6p21.3            | I-kappaB kinase                                                      | ---                                      | 1.05          | -1.40           | 1.11      | 1.14        | 1.01      | -1.15       | 1.25       | -1.09        | 1.07       | -1.07        | 1.63       | 1.70         |
| NFKBIZ   | nuclear factor of kappa light chain gene immunoglobulin receptor complex 1 associated | chr3p12-q12          | transcription, DNA-dependent                                         | ---                                      | 1.45          | 1.33            | 1.15      | 1.37        | 1.11      | 1.10        | -1.02      | -1.17        | 1.47       | 1.04         | 2.54       | 1.47         |
| NFKBIZ   | nuclear factor of kappa light chain gene immunoglobulin receptor complex 1 associated | chr3p12-q12          | transcription, DNA-dependent                                         | ---                                      | 1.34          | 1.05            | -1.07     | -1.05       | -1.18     | 1.27        | 1.51       | 1.27         | 1.23       | -1.01        | 2.29       | 1.69         |
| NFRKB    | nuclear factor related to kappa light chain gene immunoglobulin receptor complex      | chr11q24-q25         | DNA repair                                                           | ---                                      | -1.07         | -1.04           | 1.06      | 1.03        | -1.02     | -1.07       | -1.09      | -1.10        | -1.37      | -1.52        | -1.36      | -1.12        |
| NFRKB    | nuclear factor related to kappa light chain gene immunoglobulin receptor complex      | chr11q24-q25         | DNA repair                                                           | ---                                      | 1.14          | 1.21            | -1.09     | -1.29       | 1.28      | 1.02        | -1.15      | 1.22         | 1.26       | -1.10        | 1.61       | 1.62         |
| NFRKB    | nuclear factor related to kappa light chain gene immunoglobulin receptor complex      | chr11q24-q25         | DNA repair                                                           | ---                                      | 1.04          | 1.00            | 1.21      | -1.01       | 1.29      | 1.02        | -1.01      | -1.18        | 1.14       | 1.04         | 1.33       | 1.38         |
| NFS1     | NFS1 nitrogen fixation 1                                                              | chr20q11.22          | sulfur amino acid metabolic process                                  | ---                                      | 1.15          | -1.29           | 1.09      | 1.21        | 1.08      | 1.35        | 1.16       | -1.10        | -1.02      | 1.24         | 1.41       | 1.34         |
| NFU1     | NFU1 iron-sulfur cluster assembly                                                     | chr2p15-p13          | iron-sulfur cluster assembly                                         | ---                                      | 1.07          | 1.06            | 1.03      | 1.08        | -1.04     | -1.12       | 1.07       | 1.06         | -1.43      | -1.38        | -1.35      | -1.39        |
| NFX1     | nuclear transcription factor                                                          | chr9p13.3            | negative regulation of transcription from RNA polymerase II promoter | ---                                      | -1.01         | -1.15           | -1.03     | -1.05       | 1.11      | -1.01       | 1.20       | -1.01        | 1.28       | 1.19         | 1.53       | 1.36         |
| NFX1     | nuclear transcription factor                                                          | chr9p13.3            | negative regulation of transcription from RNA polymerase II promoter | ---                                      | 1.21          | 1.15            | 1.02      | 1.19        | 1.01      | 1.10        | 1.15       | 1.10         | 1.02       | -1.04        | 1.37       | 1.45         |
| NFX1     | nuclear transcription factor                                                          | chr9p13.3            | negative regulation of transcription from RNA polymerase II promoter | ---                                      | -1.28         | -1.20           | 1.13      | -1.05       | -1.05     | -1.09       | 1.50       | 1.27         | 1.42       | -1.03        | 1.27       | 1.30         |
| NFXL1    | nuclear transcription factor                                                          | chr4p12              | regulation of transcription, DNA-dependent                           | ---                                      | 1.08          | 1.07            | 1.10      | -1.10       | 1.02      | 1.09        | -1.22      | -1.13        | -1.07      | -1.05        | 1.83       | 1.68         |
| NFYA     | nuclear transcription factor                                                          | chr6p21.3            | transcription, DNA-dependent                                         | ---                                      | -1.04         | -1.02           | -1.07     | -1.10       | 1.04      | 1.17        | -2.05      | -1.05        | -1.47      | -1.25        | -1.03      | 1.05         |
| NFYA     | nuclear transcription factor                                                          | chr6p21.3            | regulation of transcription, DNA-dependent                           | ---                                      | -1.84         | -6.16           | -1.68     | 1.05        | -2.48     | -1.03       | -9.23      | -1.33        | -1.81      | -3.65        | 2.99       | 2.70         |
| NFYA     | nuclear transcription factor                                                          | chr6p21.3            | transcription, DNA-dependent                                         | ---                                      | -1.09         | 1.02            | 1.05      | 1.35        | 1.84      | 1.02        | 1.12       | 1.50         | 1.59       | 1.53         | 1.63       | 1.65         |
| NFYA     | nuclear transcription factor                                                          | chr6p21.3            | transcription, DNA-dependent                                         | ---                                      | -1.32         | -1.24           | 1.08      | 1.06        | -1.12     | -1.28       | -1.12      | -1.11        | 1.29       | 1.31         | 2.30       | 2.13         |
| NFYB     | nuclear transcription factor                                                          | chr12q22-q23         | transcription, DNA-dependent                                         | ---                                      | 1.07          | 1.07            | -1.03     | 1.03        | 1.02      | 1.00        | -1.22      | -1.04        | -1.51      | -1.23        | -1.13      | -1.23        |
| NFYB     | nuclear transcription factor                                                          | chr12q22-q23         | transcription, DNA-dependent                                         | ---                                      | -1.05         | -1.13           | -1.05     | -1.13       | -1.09     | 1.08        | -1.24      | -1.12        | -1.47      | -1.24        | -1.02      | -1.11        |
| NFYB     | nuclear transcription factor                                                          | chr12q22-q23         | transcription, DNA-dependent                                         | ---                                      | 1.09          | 1.07            | -1.20     | 1.14        | 1.29      | 1.41        | -1.64      | -1.14        | -3.10      | -3.19        | -2.32      | -2.18        |
| NFYB     | nuclear transcription factor                                                          | chr12q22-q23         | transcription, DNA-dependent                                         | ---                                      | 1.30          | 1.09            | 1.09      | 1.13        | -1.06     | 1.03        | -1.53      | -1.29        | -2.06      | -1.63        | -1.80      | -1.75        |
| NFYC     | nuclear transcription factor                                                          | chr1p32              | transcription, DNA-dependent                                         | ---                                      | 1.00          | 1.06            | -1.04     | -1.08       | -1.10     | -1.03       | -1.13      | -1.09        | -1.19      | -1.12        | -1.24      | -1.25        |
| NGDN     | neuroguidin, EGF4E binding protein                                                    | chr14q11.2           | regulation of translation                                            | ---                                      | 1.02          | -1.02           | 1.03      | 1.06        | 1.03      | -1.00       | 1.18       | 1.08         | 1.34       | 1.10         | 1.32       | 1.25         |
| NGEF     | neuronal guanine nucleotide exchange factor                                           | chr2q37              | apoptotic process                                                    | ---                                      | -1.29         | -1.19           | -1.01     | -1.06       | -1.23     | -1.07       | 1.32       | 1.25         | 1.59       | 1.46         | 1.23       | 1.73         |
| NGF      | nerve growth factor (beta)                                                            | chr1p13.1            | activation of MAPKK activity                                         | Apoptosis, KEGG // GenMAPP               | -1.21         | -1.38           | -1.29     | -1.31       | -1.27     | -1.26       | -1.42      | 1.09         | 6.77       | 5.94         | 2.18       | 1.67         |
| NGFRAP1  | nerve growth factor receptor type 1                                                   | chrXq22.2            | apoptotic process                                                    | ---                                      | -1.01         | 1.03            | -1.09     | -1.01       | -1.14     | 1.04        | -1.09      | -1.01        | 1.00       | 1.12         | -1.32      | -1.21        |
| NGLY1    | N-glycanase 1                                                                         | chr3p24.2            | nucleotide-excision repair                                           | ---                                      | -1.04         | -1.03           | 1.05      | 1.08        | 1.10      | 1.08        | 1.37       | 1.09         | 1.27       | 1.55         | 1.02       | 1.33         |
| NGLY1    | N-glycanase 1                                                                         | chr3p24.2            | glycoprotein catabolic process                                       | ---                                      | 1.29          | 2.04            | 1.09      | -1.40       | 1.06      | 1.05        | 1.21       | 1.19         | -1.22      | 1.05         | 1.49       | 1.94         |
| NGRN     | neugrin, neurite outgrowth factor                                                     | chr15q26.1           | cellular protein modification process                                | ---                                      | -1.04         | -1.05           | -1.04     | 1.02        | 1.04      | -1.05       | 1.01       | -1.04        | 1.40       | 1.32         | 1.58       | 1.71         |
| NGRN     | neugrin, neurite outgrowth factor                                                     | chr15q26.1           | cellular protein modification process                                | ---                                      | -1.02         | -1.04           | 1.00      | 1.04        | 1.07      | 1.02        | -1.01      | -1.05        | 1.40       | 1.27         | 1.36       | 1.42         |
| NHEG1    | neuroblastoma highly expressed gene 1                                                 | chr6q23              | 0                                                                    | ---                                      | -1.63         | -3.09           | -2.00     | -1.33       | -3.88     | 1.16        | 4.14       | 1.53         | 12.64      | 6.97         | -1.13      | -1.31        |
| NHLH1    | nescent helix loop helix 1                                                            | chr1q22              | transcription, DNA-dependent                                         | ---                                      | 1.26          | 1.35            | -1.05     | 1.11        | 1.16      | 1.37        | -1.02      | 1.25         | -1.81      | -1.46        | 2.48       | 2.38         |
| NHLRC2   | NHL repeat containing 2                                                               | chr10q25.3           | 0                                                                    | ---                                      | -1.28         | 1.46            | 1.18      | 1.54        | -1.17     | -1.62       | 1.16       | -1.06        | 1.26       | 1.15         | 1.31       | 1.57         |
| NHLRC2   | NHL repeat containing 2                                                               | chr10q25.3           | 0                                                                    | ---                                      | 1.11          | 1.03            | -1.02     | 1.15        | 1.00      | 1.14        | -1.35      | -1.10        | -1.73      | -1.39        | -2.43      | -2.09        |

| ID        | Gene Title                   | Chromosomal Location | 1st Gene Ontology Biological Process      | Pathway                                    | A2497 30 mins | A2497P' 30 mins | A2497 2 h | A2497P' 2 h | A2497 4 h | A2497P' 4 h | A2497 24 h | A2497P' 24 h | A2497 48 h | A2497P' 48 h | A2497 72 h | A2497P' 72 h |
|-----------|------------------------------|----------------------|-------------------------------------------|--------------------------------------------|---------------|-----------------|-----------|-------------|-----------|-------------|------------|--------------|------------|--------------|------------|--------------|
| NHLRC2    | NHL repeat containing 2      | chr10q25.3           | 0                                         | ---                                        | -1.01         | 1.02            | 1.19      | -1.10       | -1.16     | 1.00        | 1.02       | 1.11         | 1.22       | 1.18         | 1.28       | 1.28         |
| NHLRC3    | NHL repeat containing 3      | chr13q13.3           | 0                                         | ---                                        | -1.07         | 1.06            | 1.40      | 1.47        | 1.02      | 1.05        | 1.20       | 1.00         | 1.51       | 1.15         | 1.29       | 1.37         |
| NHS       | Nance-Horan syndrome (c      | chrXp22.13           | lens development in camera-type eye       | ---                                        | -1.14         | -1.18           | -1.00     | 1.07        | 1.05      | 1.14        | -1.07      | -1.03        | -1.44      | -1.35        | -1.35      | -1.30        |
| NHS       | Nance-Horan syndrome (c      | chrXp22.13           | lens development in camera-type eye       | ---                                        | -1.02         | -1.04           | 1.04      | -1.05       | -1.05     | -1.12       | -1.02      | -1.05        | -1.60      | -1.37        | -1.41      | -1.47        |
| NICN1     | nicotin 1                    | chr3p21.31           | 0                                         | ---                                        | -1.13         | -1.19           | 1.12      | 1.21        | -1.04     | -1.13       | 1.14       | 1.24         | -1.43      | -1.36        | -1.76      | -1.46        |
| NID1      | nidogen 1                    | chr1q43              | cell adhesion                             | ---                                        | 1.99          | 1.94            | -1.27     | 1.05        | -1.49     | 1.17        | -1.07      | 1.02         | 1.70       | 1.26         | 1.25       | -1.13        |
| NID1      | nidogen 1                    | chr1q43              | cell adhesion                             | ---                                        | -1.23         | 1.09            | -1.31     | 1.79        | 2.94      | 7.49        | -2.05      | -1.34        | 1.13       | -1.05        | 1.86       | 1.08         |
| NIF3L1    | NIF3 NGG1 interacting fac    | chr2q33              | positive regulation of transcription, DNA | ---                                        | 1.05          | 1.04            | -1.04     | -1.03       | 1.04      | -1.01       | -1.04      | -1.02        | 1.14       | 1.13         | 1.26       | 1.28         |
| NIM1      | serine/threonine-protein kin | chr5p12              | protein phosphorylation                   | ---                                        | -1.54         | -1.13           | 1.14      | 3.08        | -1.69     | 1.39        | 2.41       | 1.99         | 1.94       | 3.94         | 4.05       | 4.55         |
| NIN       | ninein (GSK3B interacting    | chr14q22.1           | microtubule anchoring at centrosome       | ---                                        | -1.11         | 1.00            | -1.08     | -1.24       | 1.24      | 1.19        | 1.61       | -1.04        | -1.55      | -1.28        | -1.74      | -1.74        |
| NIN       | ninein (GSK3B interacting    | chr14q22.1           | protein phosphorylation                   | ---                                        | 1.01          | -1.06           | 1.13      | 1.03        | -1.02     | -1.10       | 1.33       | 1.06         | 1.33       | 1.60         | -1.20      | -1.07        |
| NIN       | ninein (GSK3B interacting    | chr14q22.1           | microtubule anchoring at centrosome       | ---                                        | -1.01         | 1.08            | -1.00     | -1.03       | -1.05     | -1.02       | -1.12      | -1.08        | -1.54      | -1.27        | -1.40      | -1.40        |
| NINJ1     | ninjurin 1                   | chr9q22              | cell adhesion                             | ---                                        | 1.16          | 1.01            | 1.12      | 1.32        | 1.02      | -1.13       | 1.36       | 1.16         | 2.19       | 1.62         | 1.62       | 1.53         |
| NINJ2     | ninjurin 2                   | chr12p13             | cell adhesion                             | ---                                        | -1.10         | -1.09           | -1.07     | -1.07       | -1.06     | -1.08       | 1.06       | 1.15         | -1.16      | -1.29        | -2.00      | -1.88        |
| NINL      | ninein-like                  | chr20p11.22-p11.1    | G2                                        | ---                                        | 1.00          | -1.09           | 1.00      | 1.11        | 1.23      | 1.12        | -1.06      | -1.03        | -1.49      | -1.68        | -1.69      | -1.39        |
| NIPA1     | non imprinted in Prader-Wi   | chr15q11.2           | transport                                 | ---                                        | -1.06         | -1.01           | 1.02      | -1.10       | 1.08      | -1.01       | -1.01      | -1.03        | 1.21       | 1.35         | 1.62       | 1.54         |
| NIPAL2    | NIPA-like domain containi    | chr8q22.2            | magnesium ion transport                   | ---                                        | 1.15          | 1.04            | 1.06      | 1.03        | 1.03      | -1.10       | 1.07       | 1.01         | -1.87      | -2.16        | -3.91      | -3.92        |
| NIPAL3    | NIPA-like domain containi    | chr1p36.12-p35.1     | magnesium ion transport                   | ---                                        | -1.04         | -1.07           | 1.03      | 1.06        | -1.08     | -1.11       | 1.02       | 1.10         | -1.20      | -1.05        | -1.01      | 1.06         |
| NIPAL3    | NIPA-like domain containi    | chr1p36.12-p35.1     | magnesium ion transport                   | ---                                        | 1.20          | 1.31            | -1.71     | 1.04        | -1.47     | -1.20       | -1.02      | 1.37         | 1.18       | 1.21         | 2.21       | 2.22         |
| NIPAL3    | NIPA-like domain containi    | chr1p36.12-p35.1     | 0                                         | ---                                        | -1.05         | -1.04           | 1.03      | -1.01       | 1.05      | -1.05       | 1.01       | 1.03         | -1.19      | -1.05        | -1.04      | 1.01         |
| NIPBL     | Nipped-B homolog (Drosoph    | chr5p13.2            | negative regulation of transcription from | ---                                        | 1.00          | 1.04            | 1.06      | 1.03        | -1.04     | -1.05       | 1.03       | 1.03         | -1.10      | 1.09         | 1.05       | 1.04         |
| NIPBL     | Nipped-B homolog (Drosoph    | chr5p13.2            | negative regulation of transcription from | ---                                        | 1.09          | -1.01           | -1.01     | -1.01       | -1.14     | 1.14        | -1.13      | -1.00        | -1.17      | -1.07        | -1.71      | -2.03        |
| NIPBL     | Nipped-B homolog (Drosoph    | chr5p13.2            | negative regulation of transcription from | ---                                        | 1.00          | 1.01            | 1.02      | -1.06       | -1.07     | -1.02       | 1.00       | 1.02         | -1.23      | -1.14        | -1.01      | 1.03         |
| NIPSNAP1  | nipsnap homolog 1 (C. eleg   | chr22q12.2           | sensory perception of pain                | ---                                        | -1.11         | -1.16           | -1.06     | -1.01       | 1.10      | 1.09        | 1.14       | -1.01        | 1.34       | 1.39         | 1.32       | 1.56         |
| NIPSNAP1  | nipsnap homolog 1 (C. eleg   | chr22q12.2           | sensory perception of pain                | ---                                        | -1.06         | -1.10           | -1.01     | 1.02        | -1.06     | -1.04       | 1.16       | 1.11         | 1.43       | 1.46         | 1.24       | 1.46         |
| NIPSNAP3A | nipsnap homolog 3A (C. eleg  | chr9q31.1            | 0                                         | ---                                        | 1.21          | 1.21            | -1.07     | 1.01        | -1.01     | 1.23        | -1.47      | -1.13        | -1.63      | -1.35        | -2.09      | -2.25        |
| NIPSNAP3B | nipsnap homolog 3B (C. eleg  | chr9q31.1            | 0                                         | ---                                        | 1.41          | 1.02            | 1.18      | -1.08       | -1.43     | -2.61       | 1.30       | -1.08        | 1.80       | 2.88         | -1.68      | -1.58        |
| NISCH     | nischarin                    | chr3p21.1            | glucose metabolic process                 | ---                                        | -1.20         | -1.30           | -1.03     | 1.14        | 1.48      | 1.14        | 1.41       | 1.47         | 1.16       | 1.01         | 1.18       | 1.35         |
| NT1       | nitrilase 1                  | chr1q21-q22          | nitrogen compound metabolic process       | ---                                        | -1.02         | -1.04           | 1.05      | 1.06        | -1.04     | -1.13       | 1.07       | -1.03        | 1.29       | 1.24         | 1.13       | 1.24         |
| NKAIN1    | Na+/K+ transporting ATPase   | chr1p35.2            | 0                                         | ---                                        | 1.20          | -1.48           | 1.33      | 1.82        | 5.06      | 3.66        | 2.60       | -1.12        | 3.45       | -2.62        | -1.13      | -1.44        |
| NKAIN2    | Na+/K+ transporting ATPase   | chr6q21              | 0                                         | ---                                        | 1.68          | 1.65            | -1.17     | -1.09       | 1.07      | -1.65       | 1.83       | 1.16         | -1.27      | 1.62         | -1.31      | -2.97        |
| NKAP      | NFKB activating protein      | chrXq24              | negative regulation of transcription from | ---                                        | -1.06         | -1.09           | 1.02      | 1.08        | 1.06      | 1.02        | 1.21       | 1.20         | 1.38       | 1.38         | 1.27       | 1.22         |
| NKAPL     | NFKB activating protein-like | chr6p22.1            | 0                                         | ---                                        | 1.96          | -3.27           | 1.01      | 4.26        | -2.76     | 1.16        | -2.25      | 2.35         | 4.28       | 3.54         | 1.34       | 1.34         |
| NKAPP1    | NFKB activating protein      | chrXq24              | 0                                         | ---                                        | -1.33         | -1.38           | -1.04     | -1.01       | -1.02     | 1.07        | 1.13       | 1.25         | -1.48      | -1.97        | -1.80      | -1.27        |
| NKD2      | naked cuticle homolog 2 (D   | chr5p15.3            | transport                                 | ---                                        | -1.19         | 1.32            | -1.02     | -1.50       | 1.55      | -1.05       | 1.31       | 1.50         | 1.43       | 1.54         | -1.04      | 1.03         |
| NKIRAS1   | NFKB inhibitor interacting   | chr3p24.2            | GTP catabolic process                     | ---                                        | -1.13         | -1.11           | 1.07      | 1.12        | 1.11      | 1.17        | -1.01      | 1.07         | -1.36      | -1.02        | 1.04       | 1.16         |
| NKIRAS2   | NFKB inhibitor interacting   | chr17q21.2           | GTP catabolic process                     | ---                                        | -1.19         | -1.16           | -1.03     | -1.07       | 1.05      | 1.02        | -1.03      | 1.13         | -1.05      | -1.11        | -1.21      | -1.04        |
| NKRF      | NFKB repressing factor       | chrXq24              | transcription, DNA-dependent              | ---                                        | 1.04          | -1.02           | 1.18      | 1.18        | 1.11      | 1.19        | 1.07       | -1.07        | 1.16       | 1.15         | 1.28       | 1.23         |
| NKTR      | natural killer-tumor recogni | chr3p23-p21          | protein peptidyl-prolyl isomerization     | ---                                        | 1.42          | 1.38            | 1.19      | 1.05        | 1.15      | -1.06       | -1.11      | -1.14        | -1.96      | -1.65        | -1.19      | -1.47        |
| NKTR      | natural killer-tumor recogni | chr3p23-p21          | protein peptidyl-prolyl isomerization     | ---                                        | -1.62         | -1.04           | -1.29     | -1.16       | -1.79     | -1.28       | 1.40       | -1.10        | 2.56       | 3.26         | 2.12       | 1.60         |
| NKTR      | natural killer-tumor recogni | chr3p23-p21          | protein peptidyl-prolyl isomerization     | ---                                        | 1.04          | -1.19           | 1.19      | -1.08       | -1.06     | 1.32        | 1.48       | -1.01        | -1.61      | -1.19        | -1.33      | -1.33        |
| NKTR      | natural killer-tumor recogni | chr3p23-p21          | protein peptidyl-prolyl isomerization     | ---                                        | -1.16         | -1.12           | 1.16      | 1.19        | 1.19      | 1.09        | -1.28      | -1.20        | -1.42      | -1.38        | -1.44      | -1.39        |
| NKTR      | natural killer-tumor recogni | chr3p23-p21          | protein peptidyl-prolyl isomerization     | ---                                        | -1.00         | -1.03           | 1.03      | 1.02        | 1.01      | 1.02        | -1.09      | -1.13        | -1.42      | -1.33        | -1.52      | -1.50        |
| NKX2-1    | NK2 homeobox 1               | chr14q13             | negative regulation of transcription from | ---                                        | 5.40          | 2.95            | 1.12      | 1.15        | -1.44     | 1.37        | 1.63       | 2.98         | 1.76       | 3.00         | -3.75      | -1.61        |
| NKX3-2    | NK3 homeobox 2               | chr4p16.3            | skeletal system development               | ---                                        | -1.03         | -1.07           | 1.29      | 1.45        | -1.43     | -1.22       | -1.33      | -1.26        | -1.34      | -1.04        | -1.11      | -1.11        |
| NLG1      | neuroigin 1                  | chr3q26.31           | regulation of respiratory gaseous exchan  | ---                                        | 2.74          | 1.05            | -2.00     | 1.02        | 2.36      | 1.65        | 2.84       | 2.33         | 1.20       | 1.29         | -4.91      | -1.53        |
| NLG2      | neuroigin 2                  | chr17p13.1           | regulation of respiratory gaseous exchan  | ---                                        | 1.04          | -1.04           | 1.13      | 1.26        | 1.08      | -1.03       | 1.12       | 1.18         | 1.29       | 1.23         | 1.36       | 1.55         |
| NLG4Y     | neuroigin 4, Y-linked        | chrYq11.221          | cell adhesion                             | ---                                        | -1.13         | 1.17            | -2.17     | -1.08       | -1.98     | 1.24        | 13.14      | 13.08        | 1.36       | -1.27        | 1.23       | -1.07        |
| NLK       | nemo-like kinase             | chr17q11.2           | MAPK cascade                              | ---                                        | 1.02          | 1.23            | 1.11      | -1.13       | 1.25      | -1.11       | -1.73      | -1.24        | -1.15      | -1.71        | -1.96      | -3.80        |
| NLK       | nemo-like kinase             | chr17q11.2           | MAPK cascade                              | ---                                        | 1.29          | 1.12            | 1.20      | 1.01        | -1.05     | -1.27       | 1.27       | 1.04         | 1.96       | 1.71         | 1.69       | 1.64         |
| NLK       | nemo-like kinase             | chr17q11.2           | MAPK cascade                              | ---                                        | 1.02          | 1.00            | 1.05      | 1.08        | -1.01     | -1.02       | -1.02      | -1.03        | -1.26      | -1.13        | -1.54      | -1.53        |
| NLN       | neurolysin (metallopeptida   | chr5q12.3            | proteolysis                               | ---                                        | 1.17          | 1.48            | -1.30     | 1.12        | -1.15     | 1.08        | 1.08       | -1.02        | -1.03      | -1.13        | -1.16      | -1.18        |
| NLR4      | NLR family, CARD domain      | chr2p22-p21          | activation of innate immune response      | ---                                        | 2.64          | 1.88            | -2.33     | -1.76       | -3.00     | -3.24       | 1.69       | 2.89         | -2.49      | -3.32        | -1.87      | -1.56        |
| NLRP1     | NLR family, pyrin domain     | chr17p13.2           | apoptotic process                         | ---                                        | -3.70         | -8.20           | 1.02      | 1.37        | 4.79      | 3.49        | 6.87       | 1.70         | 1.27       | 1.24         | -1.28      | -1.23        |
| NLRP11    | NLR family, pyrin domain     | chr19q13.43          | oxidation-reduction process               | ---                                        | 1.02          | -1.24           | -1.01     | 1.14        | 1.11      | -1.03       | -1.87      | -1.36        | -1.44      | -1.43        | -1.18      | 1.09         |
| NMD3      | NMD3 homolog (S. cerevisi    | chr3q26.1            | transport                                 | ---                                        | -1.02         | 1.02            | -1.06     | 1.01        | 1.03      | -1.01       | 1.14       | 1.05         | -1.06      | 1.00         | -1.05      | -1.15        |
| NME1      | NME/NM23 nucleoside diph     | chr17q21.3           | negative regulation of myeloid leukocyte  | Nucleotide_Metabolism // GenMAPP           | -1.01         | -1.00           | -1.09     | 1.05        | -1.02     | 1.03        | 1.05       | -1.03        | 1.39       | 1.09         | -1.06      | -1.08        |
| NME6      | NME/NM23 nucleoside diph     | chr3p21              | nucleoside diphosphate phosphorylation    | ---                                        | 1.02          | 1.00            | -1.04     | -1.17       | 1.07      | -1.04       | 1.07       | 1.01         | 1.13       | 1.09         | 1.33       | 1.27         |
| NME7      | NME/NM23 family memb         | chr1q24              | epithelial cilium movement                | Calcium_regulation_in_cardiac_cells // Gen | 1.07          | 1.09            | -1.07     | -1.05       | -1.10     | -1.07       | -1.05      | -1.12        | 1.06       | 1.03         | -1.09      | -1.22        |
| NME7      | NME/NM23 family memb         | chr1q24              | epithelial cilium movement                | Calcium_regulation_in_cardiac_cells // Gen | -1.03         | -1.01           | -1.02     | 1.01        | 1.10      | -1.04       | -1.09      | -1.08        | -1.24      | -1.22        | -1.44      | -1.45        |
| NME8      | NME/NM23 family memb         | chr7p14.1            | nucleoside diphosphate phosphorylation    | ---                                        | -1.33         | -1.18           | 1.09      | 1.24        | -1.27     | -1.05       | 1.27       | 1.10         | 2.01       | 1.58         | 1.44       | -1.04        |
| NMI       | N-myc (and STAT) interac     | chr2q23              | transcription from RNA polymerase II pr   | ---                                        | 1.15          | 1.20            | 1.07      | -1.01       | -1.04     | -1.02       | -1.09      | 1.00         | -1.33      | -1.63        | -1.11      | -1.38        |
| NMNAT2    | nicotinamide nucleotide ad   | chr1q25              | vitamin metabolic process                 | ---                                        | 1.05          | -1.21           | 1.75      | 2.19        | 1.16      | -1.38       | 1.59       | 1.29         | -2.20      | -1.75        | -3.51      | -2.55        |
| NMNAT3    | nicotinamide nucleotide ad   | chr3p23              | vitamin metabolic process                 | ---                                        | -1.03         | -1.02           | -1.25     | -1.23       | -1.09     | 1.01        | 1.09       | 1.05         | -1.58      | -1.31        | -1.41      | -1.48        |
| NMRAL1    | NmrA-like family domain      | chr16p13.3           | potassium ion transport                   | ---                                        | -1.08         | -1.08           | 1.04      | 1.11        | 1.12      | -1.04       | 1.21       | 1.14         | 1.01       | -1.12        | -1.24      | -1.15        |
| NMRAL1    | NmrA-like family domain      | chr16p13.3           | potassium ion transport                   | ---                                        | 1.02          | -1.03           | -1.01     | 1.12        | -1.03     | -1.02       | 1.09       | 1.18         | -1.03      | 1.13         | -1.52      | -1.31        |

| ID                | Gene Title                                                    | Chromosomal Location | 1st Gene Ontology Biological Process                                 | Pathway                               | A2497 30 mins | A2497P' 30 mins | A2497 2 h | A2497P' 2 h | A2497 4 h | A2497P' 4 h | A2497 24 h | A2497P' 24 h | A2497 48 h | A2497P' 48 h | A2497 72 h | A2497P' 72 h |
|-------------------|---------------------------------------------------------------|----------------------|----------------------------------------------------------------------|---------------------------------------|---------------|-----------------|-----------|-------------|-----------|-------------|------------|--------------|------------|--------------|------------|--------------|
| NMT1              | N-mristoyltransferase 1                                       | chr17q21.31          | in utero embryonic development                                       | ---                                   | -1.09         | -1.12           | -1.05     | 1.04        | -1.04     | -1.19       | 1.12       | 1.10         | 1.59       | 1.32         | 1.55       | 1.56         |
| NMU               | neuromedin U                                                  | chr4q12              | gastric acid secretion                                               | ---                                   | -1.04         | -1.06           | -1.01     | -1.05       | 1.07      | 1.06        | -1.15      | -1.09        | 1.10       | 1.18         | -1.13      | -1.04        |
| NNMT              | nicotinamide N-methyltransferase                              | chr11q23.1           | xenobiotic metabolic process                                         | ---                                   | -1.07         | -1.09           | -1.05     | -1.01       | 1.02      | -1.02       | -1.03      | -1.01        | 1.20       | 1.06         | 1.28       | 1.33         |
| NNT               | nicotinamide nucleotide transhydrogenase                      | chr5p12              | tricarboxylic acid cycle                                             | ---                                   | -1.27         | -1.19           | -1.25     | -1.03       | 1.17      | 1.18        | 1.47       | 1.01         | -1.13      | -1.30        | -3.29      | -2.96        |
| NNT               | nicotinamide nucleotide transhydrogenase                      | chr5p12              | tricarboxylic acid cycle                                             | ---                                   | 1.08          | 1.05            | -1.02     | -1.11       | -1.06     | 1.13        | -1.18      | -1.10        | -1.56      | -1.13        | -1.44      | -1.49        |
| NOB1              | NIN1/RPN12 binding protein                                    | chr16q22.3           | 0                                                                    | ---                                   | -1.11         | -1.17           | -1.03     | -1.03       | 1.15      | -1.01       | 1.42       | 1.19         | 1.35       | 1.06         | 1.21       | 1.22         |
| NOC2L             | nucleolar complex associated protein 2                        | chr1p36.33           | negative regulation of transcription from RNA polymerase II promoter | ---                                   | 1.08          | -1.01           | -1.01     | 1.00        | -1.35     | -1.09       | 1.03       | 1.15         | 1.12       | -1.17        | 1.09       | 1.03         |
| NOC3L             | nucleolar complex associated protein 3                        | chr10q23.33          | fat cell differentiation                                             | ---                                   | 1.06          | 1.07            | 1.07      | 1.00        | -1.05     | 1.02        | 1.04       | -1.01        | -1.03      | -1.02        | 1.13       | 1.03         |
| NOD2              | nucleotide-binding oligomerization domain-like receptor 2     | chr16q21             | activation of MAPK activity                                          | ---                                   | -3.13         | -5.17           | 4.61      | 3.63        | 3.42      | 3.54        | 4.07       | 4.06         | 9.38       | 8.24         | 6.12       | 7.07         |
| NOG               | noggin                                                        | chr17q22             | negative regulation of transcription from RNA polymerase II promoter | TGF_Beta_Signaling_Pathway // GenMAPP | -1.22         | -1.31           | -1.06     | 1.36        | -1.02     | 1.33        | -1.32      | -1.00        | 1.06       | 1.90         | 1.02       | 1.41         |
| NOL10             | nucleolar protein 10                                          | chr2p25.1            | 0                                                                    | ---                                   | -1.04         | -1.04           | -1.04     | 1.01        | -1.03     | -1.04       | -1.03      | 1.09         | -1.08      | -1.22        | 1.05       | 1.08         |
| NOL3              | nucleolar protein 3 (apoptosis-inducing factor 1)             | chr16q22.1           | response to hypoxia                                                  | ---                                   | -1.07         | -1.10           | 1.08      | 1.27        | 1.10      | -1.09       | 1.24       | 1.15         | 1.20       | 1.46         | -1.15      | 1.31         |
| NOL3              | nucleolar protein 3 (apoptosis-inducing factor 1)             | chr16q22.1           | mRNA processing                                                      | ---                                   | 1.04          | 1.02            | 1.07      | 1.17        | -1.27     | -1.14       | 1.32       | 1.39         | 1.65       | 1.92         | 1.19       | 1.76         |
| NOL3              | nucleolar protein 3 (apoptosis-inducing factor 1)             | chr16q22.1           | response to hypoxia                                                  | ---                                   | -1.05         | -1.13           | 1.11      | 1.13        | 1.10      | -1.02       | 1.33       | 1.19         | 1.83       | 2.11         | 1.46       | 1.66         |
| NOL6              | nucleolar protein 6 (RNA polymerase I transcription factor 1) | chr9p13.3            | rRNA processing                                                      | ---                                   | 1.02          | -1.04           | 1.09      | 1.17        | 1.13      | 1.01        | 1.05       | 1.06         | 1.24       | 1.09         | 1.26       | 1.43         |
| NOL6              | nucleolar protein 6 (RNA polymerase I transcription factor 1) | chr9p13.3            | rRNA processing                                                      | ---                                   | -1.09         | -1.22           | 1.12      | 1.40        | 1.11      | 1.09        | 1.26       | -1.01        | -1.04      | -1.22        | 1.31       | 1.37         |
| NOL7              | nucleolar protein 7, 27kDa                                    | chr6p23              | 0                                                                    | ---                                   | 1.01          | 1.06            | 1.04      | -1.05       | -1.09     | -1.07       | -1.03      | -1.11        | -1.74      | -1.51        | -1.82      | -2.25        |
| NOL8              | nucleolar protein 8                                           | chr9q22.31           | DNA replication                                                      | ---                                   | -1.04         | -1.04           | -1.03     | -1.03       | 1.00      | -1.03       | -1.03      | 1.07         | -1.39      | -1.43        | -1.08      | -1.19        |
| NOL9              | nucleolar protein 9                                           | chr1p36.31           | maturation of 5.8S rRNA                                              | ---                                   | -1.07         | 1.04            | -1.02     | 1.02        | 1.11      | -1.09       | 1.24       | 1.02         | -1.44      | -1.45        | -1.47      | -1.71        |
| NOL9              | nucleolar protein 9                                           | chr1p36.31           | maturation of 5.8S rRNA                                              | ---                                   | 1.00          | -1.00           | 1.00      | -1.04       | 1.01      | 1.02        | -1.06      | -1.08        | -1.73      | -1.61        | -1.35      | -1.38        |
| NOLC1             | nucleolar and coiled-body phosphoprotein 1                    | chr10q24.32          | transcription, DNA-dependent                                         | ---                                   | 1.34          | 1.30            | 1.09      | -1.05       | 1.15      | 1.09        | 1.01       | -1.00        | 1.46       | 1.02         | 1.38       | 1.02         |
| NONO              | non-POU domain containing octamer-binding protein 1           | chrXq13.1            | DNA repair                                                           | mRNA_processing_Reactome // GenMAPP   | -1.02         | -1.03           | 1.05      | 1.06        | -1.01     | -1.06       | 1.27       | 1.14         | 1.05       | -1.02        | 1.30       | 1.51         |
| NONO              | non-POU domain containing octamer-binding protein 1           | chrXq13.1            | DNA repair                                                           | mRNA_processing_Reactome // GenMAPP   | -1.03         | 1.06            | -1.06     | -1.07       | 1.02      | 1.01        | 1.05       | -1.05        | -1.03      | -1.10        | -1.17      | -1.29        |
| NONO              | non-POU domain containing octamer-binding protein 1           | chrXq13.1            | DNA repair                                                           | mRNA_processing_Reactome // GenMAPP   | -1.08         | -1.08           | -1.01     | -1.06       | 1.01      | -1.13       | 1.17       | 1.10         | 1.03       | -1.03        | 1.28       | 1.43         |
| NOP14             | NOP14 nucleolar protein                                       | chr4p16.3            | endonucleolytic cleavage in ITS1 to separate 5.8S and 5.8S rRNA      | ---                                   | -1.06         | -1.10           | -1.10     | -1.01       | -1.01     | -1.03       | 1.02       | 1.02         | -1.10      | -1.19        | -1.23      | -1.21        |
| NOP14-AS1         | NOP14 antisense RNA 1                                         | chr4p16.3            | 0                                                                    | ---                                   | -1.69         | -1.54           | 1.35      | 1.12        | -1.11     | -1.13       | 1.87       | 1.31         | -1.83      | -1.92        | 1.30       | -1.07        |
| NOP14-AS1         | NOP14 antisense RNA 1                                         | chr4p16.3            | 0                                                                    | ---                                   | -1.17         | -1.09           | 1.01      | -1.04       | 1.10      | -1.04       | 1.19       | 1.15         | -1.02      | -1.14        | -1.03      | -1.07        |
| NOP16             | NOP16 nucleolar protein                                       | chr5q35.2            | 0                                                                    | ---                                   | -1.05         | -1.08           | -1.03     | 1.01        | 1.04      | 1.15        | -1.16      | -1.06        | 1.26       | 1.34         | 1.11       | 1.20         |
| NOP16             | NOP16 nucleolar protein                                       | chr5q35.2            | 0                                                                    | ---                                   | -1.08         | -1.09           | -1.05     | 1.01        | 1.07      | 1.02        | -1.01      | 1.04         | 1.15       | 1.08         | 1.19       | 1.29         |
| NOP2              | NOP2 nucleolar protein                                        | chr12p13             | rRNA processing                                                      | ---                                   | -1.01         | -1.07           | -1.02     | 1.12        | 1.02      | -1.00       | 1.10       | 1.16         | 1.61       | 1.15         | 1.44       | 1.50         |
| NOP9              | NOP9 nucleolar protein                                        | chr14q12             | 0                                                                    | GPCRDB_Other // GenMAPP               | -1.01         | -1.06           | 1.06      | 1.08        | 1.09      | 1.14        | 1.06       | 1.05         | -1.11      | -1.17        | -1.41      | -1.26        |
| NOS1              | nitric oxide synthase 1 (neuronal)                            | chr12q24.2-q24.31    | response to hypoxia                                                  | Smooth_muscle_contraction // GenMAPP  | 7.31          | 3.75            | 1.56      | 2.10        | -3.01     | -1.39       | -1.47      | -1.18        | 3.21       | 2.73         | 1.52       | -2.96        |
| NOSTRIN           | nitric oxide synthase trafficking protein                     | chr2q31.1            | endocytosis                                                          | ---                                   | -1.05         | -1.16           | 1.31      | 1.26        | 1.27      | 1.09        | 1.13       | -1.20        | -1.28      | -3.76        | -2.47      | ---          |
| NOTCH1            | notch 1                                                       | chr9q34.3            | negative regulation of transcription from RNA polymerase II promoter | ---                                   | 1.04          | -1.02           | -1.05     | -1.01       | 1.02      | 1.17        | -1.33      | -1.33        | -1.85      | -1.47        | -1.07      | -1.20        |
| NOTCH3            | notch 3                                                       | chr19p13.2-p13.1     | transcription, DNA-dependent                                         | ---                                   | -1.47         | -1.12           | 1.16      | 1.02        | 4.11      | 1.85        | -1.23      | 1.47         | 2.53       | 3.12         | 4.00       | 3.79         |
| NOV               | nephroblastoma overexpressed protein 1                        | chr8q24.1            | regulation of cell growth                                            | ---                                   | -1.02         | -1.01           | 1.02      | -1.29       | 1.00      | -1.14       | 1.01       | 1.29         | -2.17      | -1.92        | -1.23      | -1.47        |
| NOV               | nephroblastoma overexpressed protein 1                        | chr8q24.1            | regulation of cell growth                                            | ---                                   | 1.21          | 1.10            | 1.03      | -1.14       | -1.10     | 1.03        | -1.07      | -1.13        | -1.48      | -1.24        | -1.44      | -1.56        |
| NOVA2             | neuro-oncological ventral antigen 2                           | chr19q13.3           | 0                                                                    | ---                                   | 1.11          | 2.52            | -2.57     | -2.79       | -6.13     | -1.07       | 3.21       | 4.07         | -3.81      | -1.21        | -2.69      | -1.47        |
| NOX3              | NADPH oxidase 3                                               | chr6q25.3            | temperature homeostasis                                              | ---                                   | -1.94         | 1.06            | -1.91     | 1.20        | 1.79      | 2.92        | -1.10      | -2.93        | -2.31      | 2.35         | -1.25      | 1.70         |
| NOX4              | NADPH oxidase 4                                               | chr11q14.2-q21       | cell morphogenesis                                                   | ---                                   | -1.21         | -1.13           | -2.01     | -1.12       | -1.65     | -1.94       | -1.14      | -4.15        | -3.42      | -9.81        | 1.37       | ---          |
| NPAS2             | neuronal PAS domain protein 2                                 | chr2q11.2            | transcription, DNA-dependent                                         | ---                                   | -1.88         | -1.28           | -2.53     | -1.57       | 2.14      | 1.62        | 1.14       | 2.04         | 3.84       | -1.00        | 1.99       | 3.41         |
| NPAS2             | neuronal PAS domain protein 2                                 | chr2q11.2            | transcription, DNA-dependent                                         | ---                                   | 1.03          | -1.58           | -1.00     | -1.54       | 1.07      | -1.60       | 1.52       | 1.17         | 1.16       | -1.09        | 1.36       | 1.28         |
| NPAS2             | neuronal PAS domain protein 2                                 | chr2q11.2            | transcription, DNA-dependent                                         | ---                                   | 1.28          | -1.19           | 1.65      | 1.46        | 1.15      | 1.22        | 1.80       | 1.88         | 1.46       | 1.53         | 1.48       | 1.57         |
| NPAS3             | neuronal PAS domain protein 3                                 | chr14q12-q13         | transcription, DNA-dependent                                         | ---                                   | 4.80          | 5.94            | -1.59     | 1.52        | -3.33     | 1.62        | 2.58       | 1.84         | 2.57       | 1.79         | -2.57      | 1.35         |
| NPAS3             | neuronal PAS domain protein 3                                 | chr14q12-q13         | transcription, DNA-dependent                                         | ---                                   | 15.90         | 1.78            | -1.15     | 1.96        | -2.94     | -2.19       | -2.94      | -7.27        | 11.31      | 10.09        | 1.82       | 1.40         |
| NPAT              | nuclear protein, ataxia-telangiectasia                        | chr11q22-q23         | regulation of transcription involved in G1/S transition              | ---                                   | 1.07          | 1.04            | 1.01      | 1.01        | -1.02     | 1.00        | -1.11      | -1.06        | -1.70      | -1.66        | -1.47      | -1.44        |
| NPC1              | Niemann-Pick disease, type 1                                  | chr18q11.2           | protein glycosylation                                                | ---                                   | -1.12         | -1.12           | 1.01      | 1.04        | -1.04     | -1.11       | 1.16       | 1.05         | 1.84       | 1.51         | 2.38       | 2.37         |
| NPC1              | Niemann-Pick disease, type 1                                  | chr18q11.2           | protein glycosylation                                                | ---                                   | -1.15         | -1.22           | -1.06     | 1.04        | 1.25      | 1.12        | 1.04       | 1.04         | -1.05      | -1.19        | 1.29       | 1.42         |
| NPC1L1            | NPC1-like 1                                                   | chr7p13              | lipid metabolic process                                              | ---                                   | -1.95         | 1.08            | -1.33     | -1.64       | 1.32      | 1.18        | -1.68      | -1.05        | 1.60       | 1.67         | 1.39       | 1.72         |
| NPC1L1            | NPC1-like 1                                                   | chr7p13              | lipid metabolic process                                              | ---                                   | -1.23         | -1.89           | -1.01     | 1.02        | 1.14      | -1.93       | 1.08       | -2.77        | 6.16       | 1.64         | 4.19       | 9.66         |
| NPEPL1            | aminopeptidase-like 1                                         | chr20q13.32          | proteolysis                                                          | ---                                   | 1.12          | 1.03            | 1.03      | 1.03        | -1.04     | -1.04       | -1.15      | 1.03         | -2.54      | -2.20        | -2.51      | -2.50        |
| NPEPL1            | aminopeptidase-like 1                                         | chr20q13.32          | proteolysis                                                          | ---                                   | 1.05          | -1.07           | -1.13     | 1.11        | -1.12     | -1.07       | 1.31       | 1.58         | 1.19       | 1.06         | -1.28      | -1.11        |
| NPEPPS            | aminopeptidase puromycin                                      | chr17q21             | protein polyubiquitination                                           | ---                                   | 1.00          | 1.11            | -1.07     | -1.16       | -1.06     | -1.12       | -1.02      | -1.05        | -1.22      | -1.11        | -1.23      | -1.40        |
| NPEPPS            | aminopeptidase puromycin                                      | chr17q21             | protein polyubiquitination                                           | ---                                   | 1.12          | 1.09            | -1.01     | -1.08       | -1.15     | 1.01        | -1.35      | -1.12        | -1.37      | -1.06        | -1.48      | -1.45        |
| NPH1              | nephronophthisis 1 (juvenile)                                 | chr2q13              | signal transduction                                                  | ---                                   | -1.01         | -1.25           | -1.38     | -1.20       | -1.03     | 1.09        | -1.23      | -1.10        | -1.55      | -1.29        | -1.76      | -2.26        |
| NPH1              | nephronophthisis 1 (juvenile)                                 | chr2q13              | signal transduction                                                  | ---                                   | -1.14         | -1.07           | -1.10     | 1.14        | 1.05      | -1.14       | 1.29       | -1.04        | -2.14      | -2.22        | -1.71      | -1.49        |
| NPH3              | nephronophthisis 3 (adolescent)                               | chr3q22.1            | kidney development                                                   | ---                                   | 1.27          | -1.42           | -1.25     | -1.02       | -2.65     | -1.03       | 2.61       | 2.14         | -1.22      | -1.25        | 1.34       | 1.43         |
| NPIP2A /// NPIP2B | nuclear pore complex interactor 2                             | chr16p13.1           | 0                                                                    | ---                                   | 1.18          | 1.04            | 1.07      | 1.45        | -1.03     | -1.07       | 1.09       | 1.28         | -1.08      | -1.32        | -1.59      | -1.13        |
| NPL               | N-acetylneuraminate pyruvate lyase                            | chr1q25              | carbohydrate metabolic process                                       | ---                                   | 1.11          | 1.28            | 1.11      | 1.12        | 1.11      | -1.21       | -1.08      | 1.07         | -1.53      | -1.63        | 1.26       | -1.22        |
| NPL               | N-acetylneuraminate pyruvate lyase                            | chr1q25              | carbohydrate metabolic process                                       | ---                                   | 1.07          | -1.09           | 1.54      | 1.47        | 1.27      | 1.54        | -1.64      | -1.26        | 1.01       | -1.61        | 1.50       | 1.56         |
| NPLOC4            | nuclear protein localization signal 4                         | chr17qter            | cellular membrane fusion                                             | ---                                   | -1.01         | -1.09           | 1.10      | 1.15        | 1.19      | 1.08        | 1.11       | 1.03         | 1.41       | 1.00         | 1.25       | 1.36         |
| NPM1              | nucleophosmin (nucleolar protein)                             | chr5q35.1            | DNA repair                                                           | Nuclear_Receptors // GenMAPP          | -1.03         | 1.00            | -1.03     | 1.01        | 1.02      | 1.01        | 1.06       | -1.02        | 1.09       | 1.03         | -1.35      | -1.34        |
| NPM1              | nucleophosmin (nucleolar protein)                             | chr5q35.1            | DNA repair                                                           | Nuclear_Receptors // GenMAPP          | -1.06         | -1.00           | -1.09     | -1.03       | 1.02      | -1.05       | 1.13       | 1.02         | 1.24       | 1.04         | -1.08      | -1.08        |
| NPM2              | nucleophosmin/nucleoplasmic protein 2                         | chr8p21.3            | chromatin remodeling                                                 | ---                                   | -1.36         | 1.61            | -1.24     | -1.42       | 1.09      | -1.55       | -1.79      | -1.67        | -1.85      | -1.52        | -2.84      | -2.61        |
| NPM3              | nucleophosmin/nucleoplasmic protein 3                         | chr10q24.31          | rRNA processing                                                      | ---                                   | -1.03         | -1.06           | -1.04     | -1.06       | -1.00     | -1.00       | 1.09       | 1.06         | 1.22       | 1.22         | -1.00      | -1.03        |
| NPNT              | nephroectin                                                   | chr4q24              | ureteric bud development                                             | ---                                   | -1.50         | -1.24           | 1.19      | 1.25        | -1.39     | -1.26       | 1.17       | 1.10         | 2.74       | 3.31         | 2.20       | 2.54         |

| ID           | Gene Title                                       | Chromosomal Location | 1st Gene Ontology Biological Process                                 | Pathway                                 | A2497 30 mins | A2497P' 30 mins | A2497 2 h | A2497P' 2 h | A2497 4 h | A2497P' 4 h | A2497 24 h | A2497P' 24 h | A2497 48 h | A2497P' 48 h | A2497 72 h | A2497P' 72 h |
|--------------|--------------------------------------------------|----------------------|----------------------------------------------------------------------|-----------------------------------------|---------------|-----------------|-----------|-------------|-----------|-------------|------------|--------------|------------|--------------|------------|--------------|
| NPR1         | natriuretic peptide receptor                     | chr1q21-q22          | cGMP biosynthetic process                                            | ---                                     | -1.08         | 1.13            | 1.08      | 1.22        | -1.18     | -1.26       | 1.07       | 1.16         | 1.41       | 1.41         | 1.31       | 1.59         |
| NPR1         | natriuretic peptide receptor                     | chr1q21-q22          | cGMP biosynthetic process                                            | ---                                     | 1.20          | 1.01            | 1.08      | 1.23        | -1.08     | -1.01       | 1.02       | 1.09         | -1.08      | -1.17        | 1.12       | 1.55         |
| NPR3         | natriuretic peptide receptor                     | chr5p14-p13          | skeletal system development                                          | ---                                     | -1.08         | -1.06           | -1.04     | 1.00        | 1.04      | -1.06       | 1.12       | -1.17        | 1.76       | 1.67         | 1.92       | 1.69         |
| NPR3         | natriuretic peptide receptor                     | chr5p14-p13          | skeletal system development                                          | ---                                     | 1.12          | 1.22            | 1.04      | 1.01        | 1.06      | 1.04        | 1.09       | 1.01         | 1.19       | 1.28         | -1.00      | 1.14         |
| NPR3         | natriuretic peptide receptor                     | chr5p14-p13          | skeletal system development                                          | ---                                     | -1.06         | 1.07            | -1.04     | -1.12       | -1.15     | 1.01        | 1.04       | 1.08         | 1.17       | 1.41         | 1.35       | 1.33         |
| NPRL3        | nitrogen permease regulator                      | chr16p13.3           | 0                                                                    | ---                                     | -1.07         | -1.14           | -1.04     | -1.07       | 1.20      | 1.22        | 1.14       | 1.14         | 1.02       | -1.03        | 1.22       | 1.33         |
| NPRL3        | nitrogen permease regulator                      | chr16p13.3           | 0                                                                    | ---                                     | -1.12         | -1.13           | 1.12      | 1.15        | 1.16      | -1.03       | 1.26       | 1.23         | 1.05       | -1.16        | 1.15       | 1.38         |
| NPRL3        | nitrogen permease regulator                      | chr16p13.3           | 0                                                                    | ---                                     | -1.02         | -1.15           | -1.13     | 1.03        | 1.02      | -1.03       | 1.07       | 1.25         | -1.18      | -1.40        | -1.42      | -1.40        |
| NPTN-IT1     | NPTN intronic transcript 1                       | chr15q24.1           | 0                                                                    | ---                                     | 1.42          | 1.57            | -1.02     | -1.07       | 1.05      | 1.56        | -1.19      | -1.13        | -1.28      | -1.02        | -2.01      | -2.76        |
| NPW          | neuropeptide W                                   | chr16p13.3           | G-protein coupled receptor signaling pathway                         | ---                                     | -1.57         | -1.91           | -1.12     | 1.64        | 1.66      | 1.16        | -1.15      | -1.02        | -1.88      | -2.15        | -1.02      | 1.48         |
| NPY2R        | neuropeptide Y receptor Y2                       | chr4q31              | outflow tract morphogenesis                                          | GPCRDB_Class_A_Rhodopsin-like // GenMap | 2.65          | -1.32           | 2.24      | 1.15        | -3.58     | -2.46       | -2.97      | 1.27         | 1.64       | -1.13        | -1.15      | 1.18         |
| NPY6R        | neuropeptide Y receptor Y6                       | chr5q31.2            | signal transduction                                                  | GPCRDB_Class_A_Rhodopsin-like // GenMap | -1.75         | -1.18           | 1.01      | 2.50        | -1.13     | -1.43       | 1.99       | 1.98         | 3.09       | 1.12         | -2.28      | 1.48         |
| NQO1         | NAD(P)H dehydrogenase, cytochrome b5             | chr16q22.1           | regulation of cellular amino acid metabolism                         | ---                                     | -1.03         | 1.02            | -1.04     | -1.07       | 1.03      | -1.07       | -1.02      | -1.12        | 1.00       | -1.07        | -1.03      | -1.18        |
| NQO2         | NAD(P)H dehydrogenase, cytochrome b5             | chr6p25.2            | memory                                                               | ---                                     | -1.11         | -1.10           | -1.04     | 1.11        | 1.02      | -1.09       | 1.17       | 1.18         | 1.65       | 1.39         | 1.23       | 1.50         |
| NR1D1 /// TH | nuclear receptor subfamily 1, class D, member 1  | chr17q11.2           | negative regulation of transcription from RNA polymerase II promoter | Nuclear_Receptors // GenMAP             | -1.02         | -1.04           | -1.13     | 1.09        | 1.11      | 1.03        | 1.37       | 1.25         | 2.84       | 2.82         | 3.41       | 3.36         |
| NR1D1 /// TH | nuclear receptor subfamily 1, class D, member 1  | chr17q11.2           | negative regulation of transcription from RNA polymerase II promoter | Nuclear_Receptors // GenMAP             | -1.00         | -1.10           | 1.11      | 1.35        | 1.04      | -1.14       | 1.54       | 1.35         | 3.60       | 2.87         | 4.14       | 3.83         |
| NR1D2        | nuclear receptor subfamily 1, class D, member 2  | chr3p24.2            | transcription, DNA-dependent                                         | Circadian_Exercise // GenMAP // Nuclear | -1.10         | -1.24           | 1.49      | 1.20        | 1.14      | 1.09        | 1.10       | -1.40        | -1.18      | -1.08        | 1.59       | 1.11         |
| NR1H2        | nuclear receptor subfamily 1, class H, member 2  | chr19q13.3           | negative regulation of transcription from RNA polymerase II promoter | Nuclear_Receptors // GenMAP             | -1.04         | -1.24           | 1.01      | -1.05       | -1.28     | -1.32       | 1.26       | 1.05         | 1.19       | 1.14         | -1.06      | 1.07         |
| NR1I3        | nuclear receptor subfamily 1, class I, member 3  | chr12q3.3            | transcription, DNA-dependent                                         | Nuclear_Receptors // GenMAP             | -1.91         | -5.06           | -1.01     | -1.16       | -4.99     | -1.69       | -1.30      | -1.74        | 2.83       | 1.85         | -1.07      | -5.03        |
| NR2C2        | nuclear receptor subfamily 2, class C, member 2  | chr3p25              | transcription, DNA-dependent                                         | Nuclear_Receptors // GenMAP             | 1.20          | 1.18            | -1.03     | -1.06       | 1.04      | 1.14        | -1.23      | -1.03        | -1.81      | -1.46        | -1.48      | -1.56        |
| NR2C2AP      | nuclear receptor 2C2-associated protein          | chr19p13.11          | transcription initiation from RNA polymerase II promoter             | ---                                     | -1.06         | -1.12           | -1.02     | 1.03        | 1.12      | -1.02       | -1.00      | 1.27         | 1.06       | 1.30         | 1.35       | ---          |
| NR2F1        | nuclear receptor subfamily 2, class F, member 1  | chr5q14              | negative regulation of transcription from RNA polymerase II promoter | Nuclear_Receptors // GenMAP             | -1.12         | -1.08           | 1.10      | 1.14        | -1.01     | 1.02        | -1.23      | -1.15        | -1.63      | -1.77        | -2.03      | -1.59        |
| NR2F1        | nuclear receptor subfamily 2, class F, member 1  | chr5q14              | negative regulation of transcription from RNA polymerase II promoter | Nuclear_Receptors // GenMAP             | 1.04          | 1.14            | 1.03      | 1.09        | -1.11     | 1.04        | -1.42      | 1.03         | -1.51      | -1.35        | -1.95      | -1.86        |
| NR2F1-AS1    | NR2F1 antisense RNA 1                            | chr5q15              | 0                                                                    | ---                                     | 1.24          | 1.21            | -1.09     | -1.42       | 1.29      | 1.15        | 1.01       | 1.33         | -2.39      | -1.94        | -1.22      | -1.80        |
| NR2F1-AS1    | NR2F1 antisense RNA 1                            | chr5q15              | 0                                                                    | ---                                     | -1.02         | -1.01           | 1.03      | 1.16        | 1.06      | 1.03        | -1.00      | 1.07         | 1.05       | -1.13        | -1.41      | -1.27        |
| NR2F1-AS1    | NR2F1 antisense RNA 1                            | chr5q15              | 0                                                                    | ---                                     | -1.08         | 1.24            | -1.26     | 1.11        | -1.37     | -1.11       | 1.10       | -1.13        | -2.18      | -1.90        | -2.45      | -2.07        |
| NR2F2        | nuclear receptor subfamily 2, class F, member 2  | chr15q26             | negative regulation of transcription from RNA polymerase II promoter | Nuclear_Receptors // GenMAP             | 1.19          | 1.11            | 1.07      | 1.08        | -1.31     | -1.04       | -1.64      | -1.34        | -2.30      | -1.89        | -1.58      | -1.91        |
| NR2F2        | nuclear receptor subfamily 2, class F, member 2  | chr15q26             | negative regulation of transcription from RNA polymerase II promoter | Nuclear_Receptors // GenMAP             | 1.03          | 1.11            | -1.01     | -1.10       | -1.18     | -1.13       | -1.41      | -1.12        | -1.81      | -1.59        | -1.51      | -1.99        |
| NR2F2        | nuclear receptor subfamily 2, class F, member 2  | chr15q26             | negative regulation of transcription from RNA polymerase II promoter | Nuclear_Receptors // GenMAP             | -1.24         | -1.44           | 1.21      | -1.08       | -1.66     | -1.12       | -1.25      | -1.05        | -1.30      | -1.15        | -1.15      | -1.37        |
| NR2F2        | nuclear receptor subfamily 2, class F, member 2  | chr15q26             | negative regulation of transcription from RNA polymerase II promoter | Nuclear_Receptors // GenMAP             | -1.02         | -1.10           | -1.04     | 1.01        | -1.06     | -1.05       | -1.30      | -1.13        | -1.69      | -1.73        | -1.37      | -1.37        |
| NR2F2        | nuclear receptor subfamily 2, class F, member 2  | chr15q26             | negative regulation of transcription from RNA polymerase II promoter | Nuclear_Receptors // GenMAP             | 1.20          | 1.25            | 1.11      | 1.05        | -1.00     | 1.14        | -1.14      | -1.11        | -2.07      | -1.69        | -1.43      | -1.85        |
| NR2F6        | nuclear receptor subfamily 2, class F, member 6  | chr19p13.1           | negative regulation of transcription from RNA polymerase II promoter | Nuclear_Receptors // GenMAP             | -1.02         | -1.01           | 1.01      | 1.13        | -1.37     | -1.18       | 1.03       | 1.59         | -1.35      | -1.77        | 1.74       | 2.16         |
| NR3C1        | nuclear receptor subfamily 3, class C, member 1  | chr5q31.3            | regulation of gluconeogenesis                                        | Apoptosis_KEGG // GenMAP // Nuclear     | 1.16          | 1.20            | 1.03      | -1.10       | 1.05      | -1.04       | 1.13       | 1.02         | -1.01      | -1.10        | -1.18      | -1.55        |
| NR3C1        | nuclear receptor subfamily 3, class C, member 1  | chr5q31.3            | regulation of gluconeogenesis                                        | Apoptosis_KEGG // GenMAP // Nuclear     | 1.00          | 1.14            | -1.05     | -1.22       | -1.03     | -1.05       | -1.17      | -1.08        | -1.72      | -1.27        | -1.36      | -1.59        |
| NR3C1        | nuclear receptor subfamily 3, class C, member 1  | chr5q31.3            | regulation of gluconeogenesis                                        | Apoptosis_KEGG // GenMAP // Nuclear     | -1.05         | 1.07            | -1.03     | -1.18       | -1.00     | -1.01       | -1.09      | -1.44        | -1.29      | -1.33        | -1.54      | ---          |
| NR3C1        | nuclear receptor subfamily 3, class C, member 1  | chr5q31.3            | regulation of gluconeogenesis                                        | Apoptosis_KEGG // GenMAP // Nuclear     | 1.01          | 1.09            | -1.04     | -1.15       | -1.05     | -1.05       | 1.02       | 1.09         | -1.43      | -1.35        | -1.28      | -1.39        |
| NR3C1        | nuclear receptor subfamily 3, class C, member 1  | chr5q31.3            | regulation of gluconeogenesis                                        | Apoptosis_KEGG // GenMAP // Nuclear     | 2.06          | 1.55            | 1.10      | -1.07       | 1.38      | 1.50        | 1.07       | -1.03        | -3.73      | -3.15        | -4.05      | -5.22        |
| NR3C2        | nuclear receptor subfamily 3, class C, member 2  | chr4q31.1            | transcription, DNA-dependent                                         | ---                                     | 1.05          | 1.03            | -1.02     | 1.00        | 1.26      | 1.10        | -1.53      | -1.23        | -2.91      | -2.25        | -1.70      | -1.53        |
| NR4A1        | nuclear receptor subfamily 4, class A, member 1  | chr12q13.3           | positive regulation of endothelial cell proliferation                | Nuclear_Receptors // GenMAP             | -1.31         | 1.05            | 1.37      | 1.20        | -1.16     | -1.11       | 1.31       | 1.09         | 1.01       | -1.33        | -1.40      | -1.02        |
| NR4A2        | nuclear receptor subfamily 4, class A, member 2  | chr2q22-q23          | response to hypoxia                                                  | Nuclear_Receptors // GenMAP             | 1.10          | 1.17            | 1.12      | 1.10        | 1.16      | 1.17        | 1.80       | 1.38         | 2.17       | 1.90         | 1.59       | 1.33         |
| NR5A2        | nuclear receptor subfamily 5, class A, member 2  | chr1q32.1            | transcription, DNA-dependent                                         | Nuclear_Receptors // GenMAP             | 11.63         | 8.31            | -2.28     | -5.45       | 1.20      | -7.44       | 3.47       | 5.89         | 2.05       | -8.80        | -1.09      | 2.07         |
| NR5A2        | nuclear receptor subfamily 5, class A, member 2  | chr1q32.1            | transcription, DNA-dependent                                         | Nuclear_Receptors // GenMAP             | 3.61          | 5.41            | 3.81      | 7.57        | -4.07     | -1.34       | -1.24      | 1.19         | 4.66       | 5.08         | 1.28       | -1.11        |
| NR6A1        | nuclear receptor subfamily 6, class A, member 1  | chr9q33.3            | negative regulation of transcription from RNA polymerase II promoter | ---                                     | -1.10         | 1.15            | 1.24      | -1.23       | -1.21     | -1.18       | -1.00      | -2.31        | 2.30       | 1.30         | -1.12      | 1.05         |
| NRARP        | NOTCH-regulated ankyrin repeat protein           | chr9q34.3            | negative regulation of transcription from RNA polymerase II promoter | ---                                     | 1.04          | 1.05            | -1.09     | -1.02       | 1.12      | 1.07        | -1.36      | -1.14        | -1.02      | -1.11        | -1.11      | -1.25        |
| NRAS         | neuroblastoma RAS viral (v-ras) oncogene homolog | chr1p13.2            | MAPK cascade                                                         | G_Protein_Signaling // GenMAP // MAPK   | 1.21          | 1.24            | 1.00      | -1.14       | 1.09      | 1.10        | 1.23       | -1.11        | 1.23       | 1.27         | 1.17       | -1.12        |
| NRBF2        | nuclear receptor binding factor 2                | chr10q21.3           | transcription, DNA-dependent                                         | ---                                     | 1.41          | 1.32            | -1.14     | -1.18       | -1.04     | 1.19        | -1.36      | -1.18        | -1.07      | -1.05        | 1.14       | 1.00         |
| NRBP2        | nuclear receptor binding protein 2               | chr8q24.3            | protein phosphorylation                                              | ---                                     | 1.13          | -1.08           | 1.11      | 1.42        | -1.08     | -1.04       | 1.12       | 1.02         | -1.05      | -1.00        | -1.76      | -1.38        |
| NRDE2        | NRDE-2, necessary for RNAi                       | chr14q32.11          | 0                                                                    | ---                                     | -1.13         | -1.17           | 1.09      | 1.07        | -1.03     | 1.24        | 1.12       | -1.10        | -1.57      | -1.65        | -1.95      | -1.27        |
| NREP         | neuronal regeneration related protein            | chr5q22.1            | regulation of transforming growth factor signaling                   | ---                                     | -1.03         | -1.06           | 1.04      | 1.09        | 1.07      | 1.05        | -1.07      | -1.08        | -1.61      | -1.34        | -1.85      | -1.58        |
| NREP         | neuronal regeneration related protein            | chr5q22.1            | regulation of transforming growth factor signaling                   | ---                                     | 1.08          | 1.03            | 1.24      | -1.01       | 1.32      | 1.32        | -1.25      | -1.22        | -1.67      | -1.02        | -1.41      | -1.18        |
| NRG4         | neuregulin 4                                     | chr15q24.2           | epidermal growth factor receptor signaling                           | ---                                     | -1.09         | -1.07           | 1.04      | 1.03        | 1.34      | 1.11        | -1.19      | -1.09        | -1.38      | -1.23        | -1.52      | -1.01        |
| NRGN         | neurogranin (protein kinase C inhibitor)         | chr11q24             | signal transduction                                                  | ---                                     | -1.08         | -1.23           | -1.08     | 1.10        | 1.08      | -1.09       | 1.34       | 1.12         | -1.77      | -1.41        | -2.27      | -2.51        |
| NRIP1        | nuclear receptor interacting protein 1           | chr21q11.2           | negative regulation of transcription from RNA polymerase II promoter | Ovarian_Infertility_Genes // GenMAP     | 1.28          | 1.34            | 1.08      | -1.12       | -1.09     | 1.02        | -1.22      | -1.12        | -1.76      | -1.64        | -1.40      | -2.04        |
| NRIP3        | nuclear receptor interacting protein 3           | chr11p15.3           | proteolysis                                                          | ---                                     | 1.60          | 1.29            | 1.06      | 1.27        | 1.63      | 1.37        | -1.14      | -1.41        | 1.77       | 1.78         | 1.63       | 1.33         |
| NRIP3        | nuclear receptor interacting protein 3           | chr11p15.3           | proteolysis                                                          | ---                                     | 1.06          | 1.05            | 1.21      | 1.14        | 1.02      | 1.10        | -1.71      | -1.27        | 1.47       | 1.21         | 1.28       | 1.28         |
| NRM          | nurin (nuclear envelope membrane protein)        | chr6p21.33           | 0                                                                    | ---                                     | -1.06         | -1.18           | 1.00      | 1.09        | 1.02      | -1.05       | 1.25       | 1.13         | 1.11       | 1.14         | -1.64      | -1.36        |
| NRP1         | neuropilin 1                                     | chr10p12             | patterning of blood vessels                                          | ---                                     | -1.24         | -1.63           | -1.37     | 1.15        | 1.27      | 1.50        | 1.50       | -1.17        | -1.02      | 1.11         | 1.46       | 2.13         |
| NRP1         | neuropilin 1                                     | chr10p12             | angiogenesis                                                         | ---                                     | -1.11         | -1.08           | -1.01     | 1.17        | 1.06      | 1.05        | 1.11       | 1.16         | 1.71       | 1.78         | 1.66       | 1.87         |
| NRP2         | neuropilin 2                                     | chr2q33.3            | angiogenesis                                                         | ---                                     | 1.08          | 1.73            | 1.96      | 1.97        | -1.35     | -1.72       | -1.36      | 1.06         | 1.25       | 1.35         | 1.47       | 1.32         |
| NRP2         | neuropilin 2                                     | chr2q33.3            | angiogenesis                                                         | ---                                     | 1.06          | 1.18            | 1.83      | 1.25        | -1.17     | -1.24       | -1.53      | -1.11        | 1.19       | -1.03        | 1.35       | 1.16         |
| NRTN         | neurturin                                        | chr19p13.3           | MAPK cascade                                                         | ---                                     | 1.88          | -1.39           | -1.10     | -1.08       | -1.31     | -1.57       | -2.89      | 1.89         | 1.48       | 1.77         | 2.10       | ---          |
| NRXN1        | neurexin 1                                       | chr2p16.3            | angiogenesis                                                         | ---                                     | 6.14          | 5.58            | -1.50     | -2.36       | 1.00      | -2.97       | -1.07      | 1.78         | 17.57      | 2.77         | 2.17       | 2.58         |
| NRXN3        | neurexin 3                                       | chr14q31             | angiogenesis                                                         | ---                                     | -1.15         | -1.25           | 1.21      | -1.22       | -1.24     | -1.39       | -1.09      | 1.05         | -2.09      | -2.03        | -2.17      | -2.24        |
| NRXN3        | neurexin 3                                       | chr14q31             | angiogenesis                                                         | ---                                     | 1.55          | 1.31            | 1.08      | -1.20       | -1.46     | -1.23       | -1.35      | -1.11        | -3.23      | -2.25        | -2.97      | -3.83        |
| NSD1         | nuclear receptor binding domain 1                | chr5q35              | negative regulation of transcription from RNA polymerase II promoter | ---                                     | -1.04         | -1.02           | -1.05     | -1.10       | 1.10      | 1.02        | -1.10      | -1.11        | -1.27      | -1.30        | -1.34      | -1.22        |
| NSD1         | nuclear receptor binding domain 1                | chr5q35              | negative regulation of transcription from RNA polymerase II promoter | ---                                     | 1.12          | 1.22            | -1.08     | -1.07       | -1.14     | -1.02       | -1.46      | -1.19        | -3.12      | -2.43        | -3.29      | -4.07        |

| ID               | Gene Title                         | Chromosomal Location | 1st Gene Ontology Biological Process             | Pathway                             | A2497 30 mins | A2497P' 30 mins | A2497 2 h | A2497P' 2 h | A2497 4 h | A2497P' 4 h | A2497 24 h | A2497P' 24 h | A2497 48 h | A2497P' 48 h | A2497 72 h | A2497P' 72 h |
|------------------|------------------------------------|----------------------|--------------------------------------------------|-------------------------------------|---------------|-----------------|-----------|-------------|-----------|-------------|------------|--------------|------------|--------------|------------|--------------|
| NSDHL            | NAD(P) dependent steroid           | chrXq28              | hair follicle development                        | Cholesterol_Biosynthesis // GenMAPP | 1.05          | 1.07            | 1.04      | 1.04        | 1.00      | -1.07       | -1.01      | -1.02        | 1.18       | -1.01        | 1.73       | 1.60         |
| NSDHL            | NAD(P) dependent steroid           | chrXq28              | hair follicle development                        | Cholesterol_Biosynthesis // GenMAPP | -1.09         | -1.06           | 1.03      | -1.03       | 1.03      | -1.07       | 1.05       | -1.02        | 1.30       | 1.14         | 2.04       | 2.05         |
| NSF              | N-ethylmaleimide-sensitive         | chr17q21             | positive regulation of receptor recycling        | ---                                 | -1.10         | -1.15           | 1.18      | 1.08        | 1.14      | 1.02        | -1.03      | -1.00        | -1.40      | -1.10        | -1.27      | -1.17        |
| NSFL1C           | NSFL1 (p97) cofactor (p47)         | chr20p13             | 0                                                | ---                                 | -1.02         | -1.12           | -1.02     | 1.11        | 1.01      | -1.03       | -1.02      | 1.03         | -1.06      | -1.15        | -1.41      | -1.19        |
| NSFL1C           | NSFL1 (p97) cofactor (p47)         | chr20p13             | 0                                                | ---                                 | -1.03         | -1.01           | 1.01      | -1.06       | 1.03      | -1.11       | 1.07       | 1.06         | 1.04       | 1.04         | 1.05       | 1.13         |
| NSFL1C           | NSFL1 (p97) cofactor (p47)         | chr20p13             | 0                                                | ---                                 | 1.00          | -1.02           | -1.02     | -1.08       | 1.09      | 1.03        | 1.08       | 1.02         | 1.05       | 1.09         | 1.12       | 1.17         |
| NSFL1C           | NSFL1 (p97) cofactor (p47)         | chr20p13             | 0                                                | ---                                 | 1.01          | 1.06            | 1.06      | -1.01       | -1.00     | -1.07       | 1.14       | 1.08         | -1.16      | -1.04        | 1.10       | 1.03         |
| NSG1             | neuron specific gene family        | chr4p16.3            | dopamine receptor signaling pathway              | ---                                 | 3.01          | 3.25            | 1.09      | 1.09        | 1.87      | 3.59        | 1.63       | 1.57         | 4.43       | 2.69         | 2.45       | 4.44         |
| NSL1             | NSL1, MIND kinetochore             | chr1q41              | M phase of mitotic cell cycle                    | ---                                 | 1.05          | 1.10            | -1.03     | -1.03       | -1.05     | 1.10        | -1.15      | -1.01        | -1.46      | -1.30        | -1.30      | -1.36        |
| NSL1             | NSL1, MIND kinetochore             | chr1q41              | M phase of mitotic cell cycle                    | ---                                 | 1.19          | 1.02            | -1.03     | -1.11       | -1.14     | -1.13       | -1.18      | -1.18        | -1.69      | -1.47        | -1.18      | -1.08        |
| NSMAF            | neutral sphingomyelinase           | chr8q12-q13          | ceramide metabolic process                       | ---                                 | -1.01         | -1.02           | 1.02      | 1.04        | -1.04     | -1.01       | -1.03      | 1.02         | -1.14      | -1.13        | -1.37      | -1.27        |
| NSMCE4A          | non-SMC element 4 homolog          | chr10q26.13          | DNA repair                                       | ---                                 | 1.32          | 1.33            | -1.14     | 1.15        | 1.16      | -1.06       | -1.07      | 1.17         | -1.24      | -1.65        | 1.16       | 1.06         |
| NSMCE4A          | non-SMC element 4 homolog          | chr10q26.13          | DNA repair                                       | ---                                 | 1.03          | 1.01            | 1.15      | 1.17        | 1.02      | 1.06        | -1.19      | -1.03        | -1.40      | -1.38        | -1.60      | -1.27        |
| NSMCE4A          | non-SMC element 4 homolog          | chr10q26.13          | DNA repair                                       | ---                                 | -1.02         | 1.02            | 1.04      | 1.09        | 1.02      | -1.03       | 1.04       | 1.06         | -1.16      | -1.21        | -1.15      | -1.15        |
| NSMF             | NMDA receptor synaptonemal         | chr9q34.3            | positive regulation of protein dephosphorylation | ---                                 | 1.29          | 1.05            | 1.03      | 1.23        | 1.02      | -1.08       | 1.10       | 1.17         | 1.23       | 1.07         | -1.42      | -1.19        |
| NSRPF            | nuclear speckle splicing regulator | chr17q11.2           | regulation of alternative mRNA splicing          | ---                                 | 1.04          | 1.02            | -1.01     | -1.09       | -1.00     | 1.07        | -1.16      | -1.11        | 1.32       | 1.17         | 1.35       | 1.18         |
| NSUN2            | NOP2/Sun RNA methyltransferase     | chr5p15.31           | cell cycle                                       | ---                                 | -1.01         | 1.01            | -1.04     | 1.01        | -1.03     | -1.01       | -1.02      | -1.00        | -1.14      | -1.12        | -1.04      | 1.03         |
| NSUN3            | NOP2/Sun domain family, member 3   | chr3q11.1            | methylation                                      | ---                                 | 1.44          | 1.40            | 1.13      | 1.30        | -1.04     | -1.19       | -1.13      | 1.44         | 1.70       | 1.67         | 1.97       | 1.51         |
| NSUN3            | NOP2/Sun domain family, member 3   | chr3q11.1            | methylation                                      | ---                                 | 1.15          | 1.17            | 1.10      | 1.03        | -1.12     | -1.33       | 1.00       | -1.22        | 1.11       | -1.17        | 1.36       | 1.01         |
| NSUN3            | NOP2/Sun domain family, member 3   | chr3q11.1            | methylation                                      | ---                                 | 1.07          | -1.17           | -1.04     | -1.10       | 1.01      | 1.46        | -1.93      | -1.52        | -1.40      | -1.36        | -1.57      | -1.42        |
| NSUN4            | NOP2/Sun domain family, member 4   | chr1p34              | rRNA processing                                  | ---                                 | 1.87          | 1.80            | -1.13     | 1.06        | -1.13     | -1.37       | -1.47      | -1.15        | 1.19       | -1.53        | -1.64      | 1.11         |
| NSUN4            | NOP2/Sun domain family, member 4   | chr1p34              | rRNA processing                                  | ---                                 | 1.15          | 1.04            | 1.19      | 1.26        | 1.02      | 1.05        | 1.06       | 1.03         | 1.06       | -1.04        | 1.44       | 1.39         |
| NSUN4            | NOP2/Sun domain family, member 4   | chr1p34              | rRNA processing                                  | ---                                 | 1.06          | -1.08           | -1.01     | 1.21        | 1.00      | -1.10       | 1.16       | 1.08         | -1.30      | -1.21        | 1.25       | 1.27         |
| NSUN6            | NOP2/Sun domain family, member 6   | chr10p12.31          | methylation                                      | ---                                 | -1.05         | -1.19           | -1.04     | 1.04        | 1.25      | -1.11       | -1.11      | -1.00        | -1.67      | -2.21        | -1.27      | 1.06         |
| NSUN6            | NOP2/Sun domain family, member 6   | chr10p12.31          | methylation                                      | ---                                 | -1.27         | -1.16           | -1.12     | -1.15       | 1.02      | 1.02        | -1.08      | -1.06        | -1.33      | -1.44        | -1.14      | -1.14        |
| NTSC1B // NTSC1C | 5'-nucleotidase, cytosolic II      | chr2p // chr2p24.2   | purine nucleobase metabolic process              | ---                                 | 2.95          | 2.64            | 7.96      | 7.11        | 1.29      | 1.05        | -1.14      | -4.18        | 4.95       | 2.22         | 3.75       | 9.07         |
| NTSC2            | 5'-nucleotidase, cytosolic II      | chr10q24.32          | purine nucleobase metabolic process              | ---                                 | 1.04          | 1.05            | 1.06      | -1.14       | -1.05     | -1.02       | -1.23      | -1.17        | -1.78      | -1.99        | -1.17      | -1.52        |
| NTSC3A           | 5'-nucleotidase, cytosolic II      | chr7p14.3            | pyrimidine nucleobase metabolic process          | ---                                 | 1.11          | 1.08            | 1.01      | -1.02       | 1.16      | 1.09        | 1.12       | -1.08        | -1.19      | -1.15        | 1.30       | 1.12         |
| NTSC3B           | 5'-nucleotidase, cytosolic II      | chr17q21.2           | nucleotide metabolic process                     | ---                                 | -1.14         | -1.17           | -1.11     | -1.01       | 1.11      | 1.04        | 1.09       | 1.03         | -1.22      | -1.25        | -1.50      | -1.37        |
| NTSDC1           | 5'-nucleotidase domain component   | chr6q22.1            | 0                                                | ---                                 | 1.08          | -1.04           | 1.09      | -1.01       | 1.09      | 1.05        | -1.05      | -1.94        | -1.71      | -1.07        | -1.78      | -1.51        |
| NTSDC1           | 5'-nucleotidase domain component   | chr6q22.1            | 0                                                | ---                                 | -1.01         | 1.02            | -1.02     | -1.03       | -1.00     | -1.06       | 1.02       | 1.02         | -1.25      | -1.03        | -1.18      | -1.18        |
| NTSDC4           | 5'-nucleotidase domain component   | chr2q13              | 0                                                | ---                                 | 1.48          | 1.82            | -1.17     | -1.05       | 1.40      | 1.02        | 1.82       | -1.04        | 4.64       | 4.13         | 3.14       | 3.08         |
| NTSE             | 5'-nucleotidase, ecto (CD73)       | chr6q14-q21          | purine nucleobase metabolic process              | ---                                 | 1.46          | 1.95            | 1.15      | -1.06       | -1.01     | -1.06       | 2.04       | 1.54         | 1.97       | 1.74         | 2.50       | 2.39         |
| NTSE             | 5'-nucleotidase, ecto (CD73)       | chr6q14-q21          | purine nucleobase metabolic process              | ---                                 | 1.02          | 1.18            | -1.05     | 1.07        | 1.10      | 1.20        | 1.64       | 1.59         | 1.69       | 1.59         | 1.97       | 2.15         |
| NTSE             | 5'-nucleotidase, ecto (CD73)       | chr6q14-q21          | purine nucleobase metabolic process              | ---                                 | 1.20          | 1.64            | 1.51      | 1.37        | 1.13      | -1.04       | 2.07       | 1.35         | 1.95       | 1.38         | 2.47       | 2.13         |
| NTSE             | 5'-nucleotidase, ecto (CD73)       | chr6q14-q21          | purine nucleobase metabolic process              | ---                                 | -1.11         | 1.00            | 1.20      | 1.27        | 1.61      | 1.63        | 1.77       | 1.79         | 5.74       | 4.51         | 5.49       | 5.61         |
| NTAN1            | N-terminal asparagine amidase      | chr16p13.11          | memory                                           | ---                                 | -1.01         | -1.01           | -1.13     | -1.13       | 1.02      | -1.03       | 1.18       | 1.03         | -1.15      | -1.05        | 1.05       | 1.20         |
| NTMT1            | N-terminal Xaa-Pro-Lys-N           | chr9q34.11           | spindle organization                             | ---                                 | -1.07         | -1.09           | 1.02      | 1.05        | -1.00     | -1.08       | 1.24       | 1.29         | 1.79       | 1.36         | 1.48       | 1.51         |
| NTMT1            | N-terminal Xaa-Pro-Lys-N           | chr9q34.11           | spindle organization                             | ---                                 | 1.03          | -1.06           | 1.04      | 1.03        | 1.03      | 1.02        | 1.19       | 1.10         | 1.81       | 1.41         | 1.87       | 1.88         |
| NTN1             | netrin 1                           | chr17p13-p12         | neuron migration                                 | ---                                 | -1.02         | 1.88            | 4.44      | 3.57        | -9.15     | -2.46       | -1.17      | -1.12        | 1.66       | 1.47         | 2.39       | 2.16         |
| NTN4             | netrin 4                           | chr12q22             | axon guidance                                    | ---                                 | 1.08          | 1.14            | 1.08      | -1.11       | 1.04      | 1.06        | 1.25       | 1.11         | -1.49      | -1.59        | 1.15       | -1.00        |
| NTNG1            | netrin G1                          | chr1p13.3            | multicellular organismal development             | ---                                 | -1.46         | -1.60           | 1.24      | 1.25        | 7.70      | 21.60       | 1.26       | -1.96        | -2.51      | -2.47        | -3.03      | -1.57        |
| NTNG1            | netrin G1                          | chr1p13.3            | multicellular organismal development             | ---                                 | -1.33         | -1.25           | 1.09      | 1.08        | -2.45     | -1.01       | -1.16      | -1.12        | -2.25      | -2.32        | -2.00      | 1.01         |
| NTPCR            | nucleoside-triphosphatase          | chr1q42.2            | 0                                                | ---                                 | -1.10         | -1.02           | 1.06      | 1.06        | 1.01      | 1.04        | -1.01      | 1.02         | 1.03       | 1.01         | 1.31       | 1.29         |
| NTPCR            | nucleoside-triphosphatase          | chr1q42.2            | 0                                                | ---                                 | -1.07         | -1.03           | 1.05      | 1.11        | 1.10      | -1.09       | 1.16       | 1.01         | 1.78       | 1.46         | 1.57       | 1.53         |
| NTRK2            | neurotrophic tyrosine kinase       | chr9q22.1            | vasculogenesis                                   | ---                                 | 1.08          | 1.35            | 3.91      | 3.22        | -1.06     | -1.05       | 3.43       | 1.61         | 5.37       | -1.01        | 1.47       | 1.04         |
| NUAK1            | NUAK family, SNF1-like             | chr12q23.3           | protein phosphorylation                          | ---                                 | -1.02         | 1.03            | -1.02     | -1.12       | 1.04      | -1.03       | 1.13       | 1.01         | -1.28      | -1.29        | -1.48      | -1.62        |
| NUB1             | negative regulator of ubiquitin    | chr7q36              | ubiquitin-dependent protein catabolic process    | ---                                 | -1.10         | -1.03           | 1.02      | -1.01       | 1.09      | 1.01        | 1.10       | 1.08         | -1.00      | -1.11        | -1.02      | 1.04         |
| NUB1             | negative regulator of ubiquitin    | chr7q36              | ubiquitin-dependent protein catabolic process    | ---                                 | -1.05         | -1.11           | -1.13     | -1.12       | 1.01      | 1.16        | -1.02      | 1.12         | 1.13       | 1.10         | -1.19      | -1.13        |
| NUBP1            | nucleotide binding protein         | chr16p13.13          | cellular iron ion homeostasis                    | ---                                 | 1.02          | 1.08            | -1.04     | -1.07       | 1.08      | 1.04        | 1.05       | -1.05        | 1.11       | -1.05        | 1.32       | 1.33         |
| NUBP1            | nucleotide binding protein         | chr14q12             | mitochondrial respiratory chain complex          | ---                                 | 1.14          | 1.13            | 1.21      | 1.10        | -1.29     | -1.14       | -1.01      | 1.05         | -1.62      | -1.28        | -1.72      | -1.87        |
| NUCB2            | nucleobindin 2                     | chr11p15.1           | 0                                                | ---                                 | -1.10         | 1.26            | -1.10     | 1.07        | -1.03     | -1.07       | -1.06      | -1.25        | -1.17      | -1.19        | 1.76       | 1.66         |
| NUCKS1           | nuclear casein kinase and cyclin   | chr1q32.1            | phosphorylation                                  | ---                                 | 1.21          | 1.23            | -1.02     | -1.17       | -1.17     | -1.04       | -1.18      | -1.08        | -1.10      | -1.02        | -1.49      | -1.68        |
| NUCKS1           | nuclear casein kinase and cyclin   | chr1q32.1            | phosphorylation                                  | ---                                 | -1.15         | 1.01            | -1.09     | -1.18       | 1.06      | -1.07       | 1.30       | 1.31         | 1.09       | 1.01         | -1.01      | -1.01        |
| NUCKS1           | nuclear casein kinase and cyclin   | chr1q32.1            | phosphorylation                                  | ---                                 | 1.31          | 1.25            | 1.03      | 1.00        | -1.10     | -1.01       | -1.12      | -1.10        | 1.00       | 1.01         | -1.16      | -1.32        |
| NUCKS1           | nuclear casein kinase and cyclin   | chr1q32.1            | phosphorylation                                  | ---                                 | -1.05         | -1.02           | -1.04     | 1.04        | -1.08     | -1.07       | 1.06       | 1.01         | 1.27       | 1.08         | -1.10      | -1.03        |
| NUCKS1           | nuclear casein kinase and cyclin   | chr1q32.1            | 0                                                | ---                                 | -1.03         | -1.01           | -1.07     | 1.02        | -1.09     | -1.04       | 1.00       | -1.04        | 1.20       | 1.12         | -1.07      | -1.11        |
| NUDCD1           | NudC domain containing 1           | chr8q23              | 0                                                | ---                                 | 1.14          | 1.07            | -1.06     | 1.00        | -1.07     | -1.06       | 1.04       | -1.17        | 1.16       | 1.11         | 1.40       | 1.16         |
| NUDCD2           | NudC domain containing 2           | chr5q34              | 0                                                | ---                                 | 1.20          | 1.12            | 1.00      | -1.07       | -1.01     | 1.03        | 1.01       | -1.05        | -1.04      | 1.11         | 1.37       | 1.23         |
| NUDCD2           | NudC domain containing 2           | chr5q34              | 0                                                | ---                                 | 1.11          | 1.12            | 1.02      | -1.09       | -1.04     | -1.04       | -1.02      | -1.04        | 1.07       | 1.07         | 1.26       | 1.18         |
| NUDCD3           | NudC domain containing 3           | chr7p13-p12          | 0                                                | ---                                 | -1.03         | 1.00            | -1.07     | -1.04       | -1.10     | -1.09       | -1.01      | 1.08         | 1.04       | 1.19         | 1.07       | 1.18         |
| NUDT13           | nudix (nucleoside diphosphate)     | chr10q22.1           | 0                                                | ---                                 | -1.00         | -1.20           | 1.14      | -1.23       | -1.49     | -1.10       | 1.18       | 1.04         | -2.37      | -2.03        | -2.71      | -2.31        |
| NUDT16           | nudix (nucleoside diphosphate)     | chr3q22.1            | adenosine to inosine editing                     | ---                                 | -1.02         | -1.12           | -1.03     | 1.16        | -1.05     | 1.07        | -1.33      | 1.09         | -1.05      | -1.10        | 1.12       | 1.35         |
| NUDT16           | nudix (nucleoside diphosphate)     | chr3q22.1            | adenosine to inosine editing                     | ---                                 | -1.18         | -1.15           | -1.04     | 1.02        | 1.04      | 1.02        | -1.12      | 1.22         | -1.79      | -1.69        | -1.65      | -1.32        |
| NUDT16           | nudix (nucleoside diphosphate)     | chr3q22.1            | adenosine to inosine editing                     | ---                                 | -1.10         | -1.08           | -1.10     | 1.02        | -1.26     | -1.10       | 1.20       | 1.29         | -1.44      | -1.29        | -1.12      | -1.15        |
| NUDT16L1         | nudix (nucleoside diphosphate)     | chr16p13.3           | 0                                                | ---                                 | 1.04          | -1.05           | -1.15     | 1.04        | -1.26     | -1.09       | 1.10       | 1.13         | -1.03      | 1.23         | -1.82      | -1.81        |

| ID        | Gene Title                   | Chromosomal Location | 1st Gene Ontology Biological Process    | Pathway                             | A2497 30 mins | A2497P' 30 mins | A2497 2 h | A2497P' 2 h | A2497 4 h | A2497P' 4 h | A2497 24 h | A2497P' 24 h | A2497 48 h | A2497P' 48 h | A2497 72 h | A2497P' 72 h |
|-----------|------------------------------|----------------------|-----------------------------------------|-------------------------------------|---------------|-----------------|-----------|-------------|-----------|-------------|------------|--------------|------------|--------------|------------|--------------|
| NUDT16P1  | nudix (nucleoside diphosph   | chr3q22.1            | 0                                       | ---                                 | 1.10          | 1.12            | 1.08      | 1.11        | 1.04      | -1.27       | -1.02      | -1.02        | -1.57      | -1.63        | -1.22      | -1.54        |
| NUDT21    | nudix (nucleoside diphosph   | chr16q12.2           | mRNA splicing, via spliceosome          | mRNA_processing_Reactome // GenMAPP | -1.00         | 1.03            | -1.03     | -1.01       | 1.05      | 1.03        | 1.16       | 1.04         | 1.33       | 1.40         | 1.81       | 1.83         |
| NUDT21    | nudix (nucleoside diphosph   | chr16q12.2           | mRNA splicing, via spliceosome          | mRNA_processing_Reactome // GenMAPP | 1.03          | 1.04            | 1.05      | 1.02        | 1.11      | 1.01        | 1.21       | 1.10         | -1.05      | 1.10         | 1.25       | 1.17         |
| NUDT21    | nudix (nucleoside diphosph   | chr16q12.2           | mRNA splicing, via spliceosome          | mRNA_processing_Reactome // GenMAPP | 1.21          | 1.13            | 1.09      | 1.02        | -1.06     | 1.12        | -1.26      | -1.14        | -1.48      | -1.31        | -1.48      | -1.51        |
| NUDT22    | nudix (nucleoside diphosph   | chr11q13.1           | 0                                       | ---                                 | 1.00          | -1.07           | -1.01     | 1.07        | 1.04      | -1.12       | 1.26       | 1.21         | 1.64       | 1.50         | 1.31       | 1.49         |
| NUDT4     | nudix (nucleoside diphosph   | chr12q21             | cyclic nucleotide metabolic process     | ---                                 | 1.69          | 2.07            | 1.07      | -1.27       | -1.32     | -1.24       | -1.35      | 1.06         | 1.66       | 1.35         | -1.26      | 1.25         |
| NUDT5     | nudix (nucleoside diphosph   | chr10p14             | nucleobase-containing compound metabo   | ---                                 | -1.01         | -1.06           | 1.03      | 1.22        | -1.09     | 1.03        | -1.39      | -1.15        | -1.07      | 1.05         | -1.47      | -1.31        |
| NUDT6     | nudix (nucleoside diphosph   | chr4q26              | 0                                       | ---                                 | 1.02          | -1.05           | 1.07      | 1.05        | -1.05     | -1.07       | 1.36       | 1.33         | 1.40       | -1.03        | 1.24       | -1.01        |
| NUDT6     | nudix (nucleoside diphosph   | chr4q26              | 0                                       | ---                                 | 1.08          | 1.01            | 1.05      | -1.02       | 1.09      | 1.03        | 1.16       | -1.03        | -1.04      | -1.12        | 1.29       | 1.07         |
| NUDT7     | nudix (nucleoside diphosph   | chr16q23.1           | nucleoside diphosphate metabolic proces | ---                                 | -1.33         | -1.33           | -1.10     | -1.03       | -1.04     | -1.24       | -1.08      | -1.08        | -1.68      | -1.47        | -1.35      | -1.40        |
| NUDT9     | nudix (nucleoside diphosph   | chr4q22.1            | cation transport                        | ---                                 | 1.04          | 1.02            | 1.03      | -1.06       | 1.21      | 1.07        | -1.03      | -1.02        | -1.27      | -1.17        | -1.15      | -1.14        |
| NUFP1     | nuclear fragile X mental ret | chr13q14             | box C                                   | ---                                 | -1.02         | -1.05           | -1.08     | -1.14       | -1.08     | 1.06        | -1.05      | -1.09        | -1.03      | -1.07        | 1.68       | 1.49         |
| NUFP1     | nuclear fragile X mental ret | chr13q14             | box C                                   | ---                                 | 1.02          | 1.18            | -1.01     | 1.02        | -1.12     | 1.12        | -1.17      | 1.01         | -1.21      | -1.30        | -1.40      | -1.82        |
| NUFP1     | nuclear fragile X mental ret | chr13q14             | box C                                   | ---                                 | -1.02         | 1.02            | -1.08     | 1.03        | 1.14      | 1.35        | -1.12      | -1.17        | -1.02      | -1.15        | 1.35       | 1.32         |
| NUFP2     | nuclear fragile X mental ret | chr17q11.2           | 0                                       | ---                                 | 1.08          | 1.11            | 1.06      | 1.03        | 1.05      | -1.03       | -1.05      | -1.05        | -1.19      | -1.24        | 1.20       | -1.01        |
| NUFP2     | nuclear fragile X mental ret | chr17q11.2           | 0                                       | ---                                 | -1.08         | -1.02           | -1.02     | -1.00       | 1.12      | -1.04       | -1.12      | -1.05        | 1.03       | -1.12        | 1.34       | 1.35         |
| NUMA1     | nuclear mitotic apparatus p  | chr11q13             | G2                                      | ---                                 | -1.28         | -1.20           | -1.02     | -1.08       | 1.06      | -1.17       | -1.08      | -1.30        | -1.74      | -1.62        | -1.52      | -1.01        |
| NUMA1     | nuclear mitotic apparatus p  | chr11q13             | G2                                      | ---                                 | 1.16          | -1.05           | 1.27      | 1.07        | -1.23     | -1.12       | -1.22      | -1.09        | -2.53      | -1.54        | -1.98      | -1.59        |
| NUMA1     | nuclear mitotic apparatus p  | chr11q13             | G2                                      | ---                                 | 1.06          | 1.02            | 1.05      | 1.08        | -1.07     | 1.01        | 1.03       | -1.04        | -1.33      | -1.41        | -1.45      | -1.45        |
| NUMB      | numb homolog (Drosophila)    | chr14q24.3           | Notch signaling pathway                 | ---                                 | 1.05          | 1.02            | -1.06     | 1.02        | -1.07     | -1.00       | -1.10      | -1.02        | 1.19       | 1.23         | 1.08       | 1.07         |
| NUMBL     | numb homolog (Drosophila)    | chr19q13.13-q13.2    | multicellular organismal development    | ---                                 | 1.06          | 1.01            | 1.04      | -1.09       | -1.02     | 1.14        | -1.09      | -1.13        | -1.00      | 1.08         | -1.34      | -1.32        |
| NUP107    | nucleoporin 107kDa           | chr12q15             | M phase of mitotic cell cycle           | ---                                 | 1.12          | 1.12            | -1.02     | -1.04       | -1.08     | -1.03       | -1.09      | -1.10        | -1.03      | -1.23        | -1.10      | -1.34        |
| NUP133    | nucleoporin 133kDa           | chr14q2.13           | M phase of mitotic cell cycle           | ---                                 | 1.01          | -1.02           | -1.00     | 1.03        | -1.09     | 1.01        | -1.02      | -1.00        | -1.59      | -1.52        | -1.65      | -1.58        |
| NUP153    | nucleoporin 153kDa           | chr6p22.3            | carbohydrate metabolic process          | ---                                 | -1.10         | 1.08            | 1.21      | 1.46        | 1.10      | -1.53       | 1.06       | 1.13         | -1.48      | -1.69        | -1.22      | -1.61        |
| NUP155    | nucleoporin 155kDa           | chr5p13.1            | mitotic cell cycle                      | ---                                 | -1.06         | -1.06           | 1.04      | 1.09        | 1.04      | -1.02       | 1.13       | 1.02         | 1.17       | 1.07         | 1.19       | 1.19         |
| NUP160    | nucleoporin 160kDa           | chr11p11.2           | M phase of mitotic cell cycle           | ---                                 | 1.04          | -1.04           | 1.02      | 1.17        | -1.11     | 1.12        | -1.14      | 1.02         | -1.50      | -1.14        | -1.70      | -1.79        |
| NUP160    | nucleoporin 160kDa           | chr11p11.2           | M phase of mitotic cell cycle           | ---                                 | 1.19          | 1.02            | 1.03      | 1.31        | 1.01      | -1.08       | -1.01      | 1.10         | -1.03      | -1.32        | -1.59      | -1.92        |
| NUP160    | nucleoporin 160kDa           | chr11p11.2           | M phase of mitotic cell cycle           | ---                                 | 1.01          | 1.07            | -1.25     | 1.04        | -1.10     | 1.20        | -1.24      | -1.18        | -1.27      | -1.24        | -1.19      | -1.32        |
| NUP210    | nucleoporin 210kDa           | chr3p25.1            | mitotic cell cycle                      | ---                                 | -1.17         | -1.11           | -1.08     | 1.10        | 1.17      | -1.04       | 1.11       | 1.05         | -1.25      | -1.07        | -1.23      | -1.32        |
| NUP210    | nucleoporin 210kDa           | chr3p25.1            | carbohydrate metabolic process          | ---                                 | -1.07         | -1.07           | -1.03     | 1.01        | 1.02      | -1.00       | 1.08       | 1.02         | 1.17       | 1.13         | -1.05      | -1.02        |
| NUP214    | nucleoporin 214kDa           | chr9q34.1            | mitotic cell cycle                      | ---                                 | 1.02          | 1.01            | -1.02     | -1.07       | 1.03      | -1.02       | -1.29      | -1.07        | -2.44      | -2.80        | -1.98      | -2.17        |
| NUP214    | nucleoporin 214kDa           | chr9q34.1            | mitotic cell cycle                      | ---                                 | 1.06          | 1.11            | -1.01     | 1.03        | -1.04     | -1.15       | 1.13       | 1.10         | -1.27      | -1.36        | -1.09      | -1.11        |
| NUP35     | nucleoporin 35kDa            | chr2q32.1            | mitotic cell cycle                      | ---                                 | 1.20          | 1.23            | -1.03     | -1.10       | -1.04     | -1.07       | -1.31      | -1.06        | -1.47      | -1.70        | 1.03       | -1.24        |
| NUP50     | nucleoporin 50kDa            | chr22q13.31          | mitotic cell cycle                      | ---                                 | -1.13         | -1.14           | 1.04      | 1.15        | 1.04      | -1.01       | 1.35       | 1.12         | 1.34       | 1.17         | 1.47       | 1.30         |
| NUP50     | nucleoporin 50kDa            | chr22q13.31          | mitotic cell cycle                      | ---                                 | 1.00          | -1.08           | 1.09      | 1.03        | -1.01     | 1.07        | 1.22       | 1.06         | 1.54       | 1.32         | 2.03       | 1.53         |
| NUP50     | nucleoporin 50kDa            | chr22q13.31          | mitotic cell cycle                      | ---                                 | 1.04          | 1.08            | 1.02      | -1.01       | -1.04     | 1.02        | -1.19      | -1.12        | -1.35      | -1.26        | -1.25      | -1.40        |
| NUP62CL   | nucleoporin 62kDa C-termi    | chrXq22.3            | transport                               | ---                                 | 1.44          | 1.37            | 1.07      | 1.01        | -1.09     | -1.07       | 1.15       | 1.13         | -1.16      | -1.32        | -1.40      | -1.94        |
| NUP62CL   | nucleoporin 62kDa C-termi    | chrXq22.3            | transport                               | ---                                 | -1.21         | -1.10           | 1.30      | 1.01        | 1.46      | 1.11        | -1.11      | -1.11        | -3.17      | -1.34        | -2.32      | -2.20        |
| NUP98     | nucleoporin 98kDa            | chr11p15.5           | protein import into nucleus, docking    | ---                                 | 1.10          | 1.08            | -1.01     | -1.03       | -1.02     | 1.03        | -1.05      | -1.04        | -1.03      | -1.06        | 1.14       | 1.03         |
| NUP98     | nucleoporin 98kDa            | chr11p15.5           | protein import into nucleus, docking    | ---                                 | 1.13          | 1.12            | 1.09      | -1.07       | 1.05      | 1.00        | -1.20      | -1.08        | 1.06       | -1.90        | -2.07      | -1.82        |
| NUP98     | nucleoporin 98kDa            | chr11p15.5           | protein import into nucleus, docking    | ---                                 | 1.01          | -1.03           | 1.03      | 1.08        | 1.10      | -1.04       | 1.17       | 1.09         | 1.17       | 1.00         | 1.34       | 1.46         |
| NUPL1     | nucleoporin like 1           | chr13q12.13          | mitotic cell cycle                      | ---                                 | 1.03          | -1.09           | 1.19      | 1.27        | 1.15      | -1.06       | 1.15       | -1.02        | 2.95       | 1.89         | 2.06       | 2.12         |
| NUPL2     | nucleoporin like 2           | chr7p15              | mitotic cell cycle                      | ---                                 | 1.24          | 1.13            | 1.17      | 1.08        | 1.00      | 1.17        | -1.24      | -1.35        | -1.60      | -1.57        | -1.24      | -1.31        |
| NUS1      | nuclear undecaprenyl pyro    | chr6q22.1            | angiogenesis                            | ---                                 | 1.24          | 1.27            | 1.04      | -1.15       | -1.01     | -1.03       | -1.44      | -1.21        | -1.94      | -1.46        | -1.26      | -1.34        |
| NUS1      | nuclear undecaprenyl pyro    | chr6q22.1            | angiogenesis                            | ---                                 | 1.13          | 1.16            | 1.17      | 1.15        | -1.02     | 1.04        | 1.02       | -1.13        | 1.10       | 1.34         | 1.59       | 1.41         |
| NUS1P3    | nuclear undecaprenyl pyro    | chr13q12             | angiogenesis                            | ---                                 | 1.06          | -1.13           | -1.07     | -1.23       | -1.16     | -1.23       | -1.18      | -1.07        | 1.09       | -1.07        | 1.07       | -1.12        |
| NUSAP1    | nucleolar and spindle assoc  | chr15q15.1           | mitotic sister chromatid segregation    | ---                                 | -1.09         | -1.06           | 1.08      | -1.05       | 1.08      | -1.01       | -1.02      | 1.07         | 1.25       | 1.05         | 1.29       | 1.14         |
| NUTM2A-AS | NUTM2A antisense RNA         | chr10q23.2           | 0                                       | ---                                 | 1.05          | 1.02            | -1.01     | -1.41       | 1.08      | 1.08        | -1.30      | -1.06        | -2.72      | -3.10        | -2.93      | -2.09        |
| NVL       | nuclear VCP-like             | chr14q1-q42.2        | DNA repair                              | ---                                 | 1.04          | 1.02            | -1.03     | 1.07        | 1.15      | 1.01        | 1.14       | 1.07         | -1.28      | -1.18        | -1.15      | -1.09        |
| NXF1      | nuclear RNA export factor    | chr11q12-q13         | RNA export from nucleus                 | mRNA_processing_Reactome // GenMAPP | -1.02         | 1.02            | 1.05      | -1.01       | 1.02      | -1.01       | -1.01      | -1.04        | -1.22      | -1.39        | -1.07      | -1.09        |
| NXPE3     | neurexophilin and PC-ester   | chr3q12.3            | 0                                       | ---                                 | 1.21          | 1.00            | 1.09      | -1.15       | -1.02     | 1.40        | -1.35      | -1.32        | -2.47      | -2.39        | -1.75      | -2.02        |
| NXPE4     | neurexophilin and PC-ester   | chr11q23.2           | 0                                       | ---                                 | 1.43          | 1.01            | -1.13     | 1.52        | -2.34     | -1.95       | -1.57      | 1.44         | 11.41      | 8.03         | -14.67     | 1.14         |
| NXP4      | neurexophilin 4              | chr12q13.3           | neuropeptide signaling pathway          | ---                                 | 1.01          | -1.02           | 1.16      | 1.02        | 1.01      | -1.33       | 1.24       | -1.20        | 1.54       | 1.55         | 1.39       | 2.10         |
| NXT1      | NTF2-like export factor 1    | chr20p12-p11.2       | RNA export from nucleus                 | ---                                 | 1.05          | 1.16            | 1.11      | -1.24       | -1.01     | -1.09       | -1.07      | -1.07        | 1.33       | 1.01         | 1.45       | 1.22         |
| NXT2      | nuclear transport factor 2-l | chrXq23              | transport                               | ---                                 | 1.04          | 1.05            | -1.01     | 1.02        | -1.14     | -1.03       | -1.17      | -1.07        | -1.36      | -1.15        | -1.45      | -1.70        |
| NYAP1     | neuronal tyrosine-phosphor   | chr7q22.1            | phosphatidylinositol 3-kinase cascade   | ---                                 | -1.23         | -1.27           | 1.20      | 1.68        | 1.62      | 1.15        | -1.03      | 1.26         | -1.01      | 1.15         | 2.29       | 1.58         |
| NYAP2     | neuronal tyrosine-phosphor   | chr2q36.3            | phosphatidylinositol 3-kinase cascade   | ---                                 | 1.25          | 1.02            | 1.04      | -1.17       | 1.24      | 1.19        | 1.19       | -1.06        | -3.50      | -2.50        | -3.19      | -3.28        |
| OAF       | OAF homolog (Drosophila)     | chr12q3.3            | 0                                       | ---                                 | 1.07          | 1.08            | -1.08     | 1.07        | -1.12     | -1.08       | 1.09       | 1.02         | 1.76       | 1.46         | 1.12       | 1.13         |
| OARD1     | O-acyl-ADP-ribose deacetyl   | chr6p21.1            | purine nucleoside metabolic process     | ---                                 | -1.11         | -1.07           | -1.03     | 1.09        | 1.04      | -1.05       | -1.01      | 1.10         | -1.12      | 1.04         | 1.02       | 1.08         |
| OAS1      | 2'-5'-oligoadenylate synthet | chr12q24.2           | purine nucleotide biosynthetic process  | ---                                 | -1.03         | -1.12           | 1.06      | 1.03        | 1.09      | -1.00       | 1.97       | 1.23         | 1.37       | 1.07         | -1.03      | -1.21        |
| OAS1      | 2'-5'-oligoadenylate synthet | chr12q24.2           | purine nucleotide biosynthetic process  | ---                                 | 1.06          | -1.00           | -1.11     | -1.06       | -1.15     | -1.03       | 1.36       | 1.41         | 1.23       | 1.12         | -1.09      | -1.09        |
| OAS2      | 2'-5'-oligoadenylate synthet | chr12q24.2           | nucleobase-containing compound metabo   | ---                                 | 1.13          | 1.11            | 1.22      | 1.28        | 1.04      | -1.10       | 4.12       | 3.22         | 3.11       | 1.47         | 1.09       | -1.91        |
| OAS2      | 2'-5'-oligoadenylate synthet | chr12q24.2           | nucleobase-containing compound metabo   | ---                                 | 1.00          | 1.07            | 1.29      | 1.48        | 1.89      | 1.30        | 3.65       | 2.90         | 2.46       | 2.30         | 2.11       | 1.03         |
| OAS2      | 2'-5'-oligoadenylate synthet | chr12q24.2           | nucleobase-containing compound metabo   | ---                                 | -1.29         | -1.82           | 1.50      | 2.58        | 1.13      | 1.27        | 10.81      | 4.93         | 1.70       | -1.19        | 1.10       | 1.01         |
| OAS3      | 2'-5'-oligoadenylate synthet | chr12q24.2           | nucleobase-containing compound metabo   | ---                                 | 1.11          | 1.11            | 1.08      | 1.08        | 1.01      | -1.03       | 1.58       | 1.25         | 1.52       | 1.36         | -1.10      | -1.18        |
| OASL      | 2'-5'-oligoadenylate synthet | chr12q24.2           | immune response                         | ---                                 | -1.21         | -1.18           | -1.07     | 1.07        | -1.05     | -1.03       | 7.66       | 5.06         | 4.66       | 2.91         | 3.87       | 2.70         |

| ID       | Gene Title                                       | Chromosomal Location | 1st Gene Ontology Biological Process           | Pathway                                       | A2497 30 mins | A2497P' 30 mins | A2497 2 h | A2497P' 2 h | A2497 4 h | A2497P' 4 h | A2497 24 h | A2497P' 24 h | A2497 48 h | A2497P' 48 h | A2497 72 h | A2497P' 72 h |
|----------|--------------------------------------------------|----------------------|------------------------------------------------|-----------------------------------------------|---------------|-----------------|-----------|-------------|-----------|-------------|------------|--------------|------------|--------------|------------|--------------|
| OASL     | 2'-5'-oligoadenylate synthetase                  | chr12q24.2           | immune response                                | ---                                           | -1.15         | -1.16           | -1.02     | 1.27        | 1.18      | 1.15        | 6.89       | 4.18         | 6.16       | 4.16         | 2.80       | 2.16         |
| OAZ1     | ornithine decarboxylase                          | chr19p13.3           | regulation of cellular amino acid metabolism   | Nucleotide_Metabolism // GenMAP               | -1.05         | 1.03            | -1.04     | -1.02       | 1.01      | -1.02       | 1.02       | -1.02        | 1.26       | 1.15         | 1.12       | 1.07         |
| OAZ2     | ornithine decarboxylase                          | chr15q22.31          | regulation of cellular amino acid metabolism   | ---                                           | -1.06         | -1.03           | 1.06      | 1.02        | 1.06      | -1.05       | -1.15      | -1.17        | -1.28      | -1.16        | -1.29      | -1.18        |
| OAZ3     | ornithine decarboxylase                          | chr11q21.3           | regulation of cellular amino acid metabolism   | ---                                           | -1.05         | -1.13           | -1.01     | -1.01       | 1.04      | 1.01        | 1.09       | -1.01        | 1.08       | 1.16         | -1.00      | 1.21         |
| OBFC1    | oligonucleotide/oligosaccharide transferase      | chr10q24.33          | telomere maintenance                           | ---                                           | 1.13          | -1.07           | -1.98     | -1.63       | 2.74      | 2.72        | -1.96      | -1.58        | 1.30       | 1.37         | 1.50       | 1.82         |
| OBFC1    | oligonucleotide/oligosaccharide transferase      | chr10q24.33          | telomere maintenance                           | ---                                           | -1.10         | -1.07           | 1.06      | 1.14        | 1.01      | -1.17       | 1.34       | 1.25         | 2.42       | 1.87         | 2.02       | 2.30         |
| OBP2A    | odorant binding protein 2A                       | chr9q34              | transport                                      | ---                                           | -1.74         | -1.74           | 2.40      | 1.92        | -1.09     | 3.59        | -1.28      | -2.29        | -2.09      | -1.61        | -3.72      | -3.96        |
| OBSL1    | obscurin-like 1                                  | chr2q35              | cytoskeleton organization                      | ---                                           | -1.08         | 1.23            | -8.95     | -2.09       | -17.30    | -2.31       | -1.58      | 1.35         | -3.61      | -2.19        | 3.44       | 2.10         |
| OBSL1    | obscurin-like 1                                  | chr2q35              | cytoskeleton organization                      | ---                                           | -1.23         | -1.31           | 1.06      | 1.17        | 1.06      | -1.10       | 1.17       | 1.08         | -1.13      | -1.14        | -2.11      | -1.50        |
| OBSL1    | obscurin-like 1                                  | chr2q35              | cytoskeleton organization                      | ---                                           | -1.03         | -1.10           | -1.01     | 1.20        | 1.03      | -1.09       | 1.30       | 1.25         | -1.04      | -1.11        | -2.23      | -1.69        |
| OCEL1    | occludin/ELL domain containing 1                 | chr19p13.11          | 0                                              | ---                                           | -1.07         | -1.19           | -1.11     | -1.17       | -1.18     | -1.16       | -1.03      | 1.06         | 1.38       | 1.36         | 1.75       | 2.00         |
| OC1AD1   | OC1A domain containing 1                         | chr4p11              | 0                                              | ---                                           | -1.03         | -1.26           | 1.15      | 1.34        | -1.03     | 1.06        | 1.24       | 1.09         | 2.09       | 2.35         | 2.36       | 1.92         |
| OC1AD1   | OC1A domain containing 1                         | chr4p11              | 0                                              | ---                                           | -1.04         | -1.02           | 1.01      | -1.06       | 1.02      | 1.01        | -1.06      | -1.10        | -1.34      | -1.13        | -1.04      | -1.07        |
| OC1AD1   | OC1A domain containing 1                         | chr4p11              | 0                                              | ---                                           | 1.01          | 1.05            | -1.05     | -1.15       | 1.01      | -1.07       | -1.12      | -1.16        | -1.27      | -1.24        | -1.03      | -1.08        |
| OC1AD1   | OC1A domain containing 1                         | chr4p11              | 0                                              | ---                                           | 1.33          | 1.09            | -1.03     | 1.07        | -1.12     | 1.22        | -1.37      | -1.05        | -1.46      | -1.08        | -1.56      | -1.23        |
| OC1AD2   | OC1A domain containing 2                         | chr4p11              | 0                                              | ---                                           | -1.09         | -1.01           | 1.01      | -1.08       | -1.08     | -1.05       | 1.16       | -1.00        | 1.18       | -1.01        | 1.02       | -1.08        |
| OCLM     | oculomedin                                       | chr1q25              | visual perception                              | ---                                           | -1.11         | 1.05            | -1.12     | -1.39       | -1.27     | -1.01       | 1.23       | 1.04         | 1.26       | 1.17         | 1.16       | -1.49        |
| OCLN     | occludin                                         | chr5q13.1            | protein complex assembly                       | ---                                           | 1.43          | 1.44            | -1.01     | 1.26        | 1.27      | 1.02        | -1.20      | -1.06        | -2.44      | -2.29        | -1.98      | -1.76        |
| OCLN     | occludin                                         | chr5q13.1            | protein complex assembly                       | ---                                           | -1.01         | -1.41           | -1.07     | 1.04        | 1.81      | 1.36        | 1.12       | 1.30         | -4.68      | -2.38        | -2.47      | -4.54        |
| ODAM     | odontogenic, ameloblast associated               | chr4q13.3            | biomineral tissue development                  | ---                                           | -1.10         | 1.07            | -1.08     | -1.08       | -1.34     | -1.10       | -1.25      | -1.08        | -1.89      | -1.35        | -3.34      | -2.67        |
| ODC1     | ornithine decarboxylase 1                        | chr2p25              | kidney development                             | ---                                           | 1.09          | 1.14            | 1.02      | -1.00       | 1.05      | -1.03       | -1.23      | 1.08         | -1.29      | -1.19        | -1.40      | -1.40        |
| ODF2     | outer dense fiber of sperm                       | chr9q34.11           | G2                                             | ---                                           | -1.07         | -1.15           | 1.09      | 1.03        | -1.11     | -1.22       | 1.35       | 1.11         | 2.32       | 2.00         | 1.88       | 1.98         |
| ODF2     | outer dense fiber of sperm                       | chr9q34.11           | G2                                             | ---                                           | 1.12          | -1.07           | 1.12      | 1.08        | -1.05     | 1.03        | -1.21      | 1.03         | 1.20       | 1.28         | 1.22       | 1.41         |
| ODF2L    | outer dense fiber of sperm                       | chr1p22.3            | 0                                              | ---                                           | -1.22         | -1.47           | 1.00      | 1.15        | 1.12      | 1.16        | -1.04      | 1.10         | -1.06      | 1.09         | 1.20       | -1.08        |
| ODF2L    | outer dense fiber of sperm                       | chr1p22.3            | 0                                              | ---                                           | -1.44         | -1.84           | -1.14     | -1.03       | -1.17     | -1.32       | -1.32      | -1.05        | -1.92      | -1.53        | -2.13      | -2.25        |
| ODF3B    | outer dense fiber of sperm                       | chr22q13.33          | 0                                              | ---                                           | 1.19          | 1.50            | 1.38      | 1.71        | -1.11     | -1.71       | 2.78       | 1.36         | 1.02       | 1.03         | -1.31      | -1.31        |
| ODF3B    | outer dense fiber of sperm                       | chr22q13.33          | cell growth                                    | ---                                           | 1.15          | -1.24           | 1.36      | 1.76        | -1.10     | -1.23       | 1.97       | 1.34         | 1.73       | 1.40         | -1.06      | -1.27        |
| OFD1     | oral-facial-digital syndrome                     | chrXp22              | G2                                             | ---                                           | 1.01          | -1.04           | 1.07      | 1.15        | 1.04      | -1.03       | 1.04       | 1.11         | -1.51      | -1.63        | -1.25      | -1.21        |
| OGDH     | oxoglutarate (alpha-ketoglutarate) decarboxylase | chr7p14-p13          | generation of precursor metabolites and energy | Krebs-TCA_Cycle // GenMAP                     | -1.13         | -1.22           | -1.32     | -1.16       | 1.25      | 1.01        | 1.17       | 1.20         | 5.86       | 4.64         | 3.34       | 3.69         |
| OGDH     | oxoglutarate (alpha-ketoglutarate) decarboxylase | chr7p14-p13          | generation of precursor metabolites and energy | Krebs-TCA_Cycle // GenMAP                     | -1.20         | -1.05           | 1.03      | -1.11       | 1.32      | -1.01       | 1.24       | -1.03        | 3.40       | 3.08         | 2.08       | 2.18         |
| OGDH     | oxoglutarate (alpha-ketoglutarate) decarboxylase | chr7p14-p13          | generation of precursor metabolites and energy | Krebs-TCA_Cycle // GenMAP                     | -1.00         | -1.13           | -1.02     | 1.06        | 1.14      | -1.02       | -1.00      | 1.01         | 1.40       | 1.22         | 1.05       | 1.12         |
| OGFOD1   | 2-oxoglutarate and iron-dependent oxidoreductase | chr16q12.2           | oxidation-reduction process                    | ---                                           | -1.03         | 1.01            | 1.01      | 1.09        | -1.02     | -1.08       | 1.04       | 1.05         | 1.30       | 1.05         | 1.17       | 1.24         |
| OGFOD1   | 2-oxoglutarate and iron-dependent oxidoreductase | chr16q12.2           | oxidation-reduction process                    | ---                                           | 1.08          | -1.02           | 1.01      | -1.06       | 1.07      | -1.08       | 1.04       | 1.02         | 1.45       | 1.29         | 1.30       | 1.40         |
| OGFOD3   | 2-oxoglutarate and iron-dependent oxidoreductase | chr17q25.3           | oxidation-reduction process                    | ---                                           | 1.07          | -1.08           | 1.12      | 1.10        | 1.14      | -1.06       | 1.21       | 1.12         | 1.45       | 1.17         | -1.11      | 1.18         |
| OGFR     | opioid growth factor receptor                    | chr20q13.3           | regulation of cell growth                      | ---                                           | -1.19         | -1.34           | 1.08      | 1.10        | 1.11      | 1.01        | 1.06       | 1.12         | 1.17       | 1.04         | -1.08      | 1.26         |
| OGFRL1   | opioid growth factor receptor                    | chr6q13              | 0                                              | ---                                           | 1.09          | 1.13            | 1.05      | 1.03        | 1.01      | 1.09        | -1.22      | -1.04        | -1.06      | -1.09        | -1.14      | -1.38        |
| OGFRL1   | opioid growth factor receptor                    | chr6q13              | 0                                              | ---                                           | 1.11          | 1.15            | 1.08      | 1.03        | -1.13     | -1.03       | 1.30       | 1.19         | 1.98       | 1.38         | 1.41       | 1.26         |
| OGG1     | 8-oxoguanine DNA glycosylase                     | chr3p26.2            | acute inflammatory response                    | Calcium_regulation_in_cardiac_cells // GenMAP | 1.03          | -1.03           | -1.02     | 1.05        | -1.01     | -1.05       | -1.01      | 1.05         | -1.56      | -1.42        | -2.72      | -2.23        |
| OGG1     | 8-oxoguanine DNA glycosylase                     | chr3p26.2            | acute inflammatory response                    | Calcium_regulation_in_cardiac_cells // GenMAP | 1.04          | -1.03           | 1.02      | 1.11        | 1.08      | -1.02       | 1.09       | -1.02        | -1.91      | -1.85        | -1.85      | -1.68        |
| OGG1     | 8-oxoguanine DNA glycosylase                     | chr3p26.2            | acute inflammatory response                    | Calcium_regulation_in_cardiac_cells // GenMAP | -1.11         | -2.27           | -1.37     | -1.74       | -1.71     | -1.37       | 1.24       | -1.27        | 7.20       | 6.02         | 1.19       | -1.33        |
| OGT      | O-linked N-acetylglucosaminyltransferase         | chrXq13              | regulation of glycolysis                       | ---                                           | 1.09          | 1.17            | 1.04      | -1.12       | -1.00     | -1.04       | -1.12      | -1.15        | -1.36      | -1.53        | -1.28      | -1.39        |
| OGT      | O-linked N-acetylglucosaminyltransferase         | chrXq13              | regulation of glycolysis                       | ---                                           | 1.13          | 1.06            | 1.06      | -1.00       | 1.07      | -1.02       | 1.10       | -1.00        | -2.24      | -2.08        | -2.43      | -2.21        |
| OGT      | O-linked N-acetylglucosaminyltransferase         | chrXq13              | regulation of glycolysis                       | ---                                           | 1.22          | 1.13            | 1.02      | -1.14       | -1.04     | 1.01        | -1.27      | -1.28        | -1.94      | -1.72        | -1.70      | -1.63        |
| OGT      | O-linked N-acetylglucosaminyltransferase         | chrXq13              | regulation of glycolysis                       | ---                                           | 1.10          | 1.07            | -1.07     | -1.12       | 1.15      | 1.08        | 1.10       | 1.05         | -1.93      | -1.75        | -1.76      | -1.84        |
| OGT      | O-linked N-acetylglucosaminyltransferase         | chrXq13              | regulation of glycolysis                       | ---                                           | 1.02          | -1.03           | -1.00     | -1.00       | -1.02     | -1.04       | 1.07       | 1.05         | -1.95      | -1.67        | -2.00      | -2.02        |
| OIP5     | Opa interacting protein 5                        | chr15q15.1           | nucleosome assembly                            | ---                                           | 1.11          | 1.02            | 1.03      | -1.01       | -1.03     | -1.17       | 1.04       | 1.05         | -1.68      | -1.52        | -1.08      | -1.18        |
| OIP5-AS1 | OIP5 antisense RNA 1                             | chr15q15.1           | 0                                              | ---                                           | -1.09         | -1.03           | 1.07      | 1.05        | 1.03      | 1.06        | -1.07      | -1.10        | -1.20      | -1.05        | -1.07      | 1.12         |
| OIP5-AS1 | OIP5 antisense RNA 1                             | chr15q15.1           | 0                                              | ---                                           | 1.04          | 1.03            | -1.11     | -1.10       | -1.04     | 1.06        | -1.02      | -1.14        | -1.38      | -1.19        | 1.05       | -1.05        |
| OLA1     | Obg-like ATPase 1                                | chr2q31.1            | ATP catabolic process                          | ---                                           | -1.35         | -1.04           | 1.19      | 1.01        | 1.79      | 1.74        | 1.22       | 1.03         | 1.09       | 1.17         | -1.04      | -1.36        |
| OLFM1    | olfactomedin 1                                   | chr9q34.3            | multicellular organismal development           | ---                                           | 1.04          | -1.01           | -1.01     | 1.04        | 1.03      | 1.05        | -1.09      | -1.02        | 1.41       | 1.39         | 1.41       | 1.59         |
| OLFM1    | olfactomedin 1                                   | chr9q34.3            | multicellular organismal development           | ---                                           | 1.02          | -1.02           | 1.05      | 1.01        | 1.18      | 1.02        | 1.22       | 1.05         | 1.67       | 1.43         | 1.45       | 1.42         |
| OLFM2    | olfactomedin 2                                   | chr19p13.2           | protein secretion                              | ---                                           | 2.70          | 1.62            | 1.15      | 2.20        | -1.63     | 1.30        | 1.13       | -1.74        | 1.10       | 1.53         | 2.68       | 2.80         |
| OLFM2LA  | olfactomedin-like 2A                             | chr9q33.3            | extracellular matrix organization              | ---                                           | 1.30          | 1.17            | -1.11     | -1.11       | -1.11     | 1.06        | -1.42      | -1.18        | -1.47      | -1.16        | -1.68      | -1.36        |
| OLIG2    | oligodendrocyte lineage transcription factor 2   | chr21q22.11          | negative regulation of transcription from DNA  | ---                                           | 1.90          | 3.08            | 1.02      | 1.38        | 1.22      | 1.53        | 1.02       | -1.33        | 1.22       | 1.13         | 1.58       | 1.05         |
| OLR1     | oxidized low density lipoprotein receptor 1      | chr12p13.2-p12.3     | proteolysis                                    | ---                                           | 1.45          | 1.03            | -1.17     | -1.08       | -1.07     | 1.11        | 1.34       | 1.07         | 3.73       | 2.28         | 3.80       | 2.37         |
| OMA1     | OMA1 zinc metalloprotease                        | chr1p32.2-p32.1      | diet induced thermogenesis                     | ---                                           | 1.33          | 1.31            | 1.07      | 1.07        | -1.21     | -1.05       | -1.21      | 1.05         | -1.39      | -1.35        | -1.22      | -1.28        |
| ONECUT2  | one cut homeobox 2                               | chr18q21.31          | liver development                              | ---                                           | 1.09          | 1.06            | 1.01      | -1.06       | -1.10     | -1.01       | -1.02      | -1.03        | -1.40      | -1.31        | -1.20      | -1.42        |
| ONECUT2  | one cut homeobox 2                               | chr18q21.31          | liver development                              | ---                                           | -1.11         | -1.22           | 1.14      | 1.02        | 1.04      | 1.13        | -1.30      | -1.25        | -1.34      | -1.04        | -1.35      | -1.24        |
| OPA1     | optic atrophy 1 (autosomal)                      | chr3q28-q29          | mitochondrial fission                          | ---                                           | -1.10         | -1.06           | 1.03      | 1.04        | -1.04     | -1.05       | -1.04      | 1.04         | -1.32      | 1.01         | -1.25      | -1.17        |
| OPA1     | optic atrophy 1 (autosomal)                      | chr3q28-q29          | mitochondrial fission                          | ---                                           | 1.21          | -1.08           | 1.13      | 1.38        | -1.05     | 1.00        | 1.62       | 1.53         | 2.55       | 1.47         | -1.34      | -1.39        |
| OPA3     | optic atrophy 3 (autosomal)                      | chr19q13.32          | visual perception                              | ---                                           | -1.07         | -1.06           | 1.00      | 1.10        | 1.17      | -1.04       | 1.08       | 1.22         | 1.66       | 1.28         | 1.83       | 1.92         |
| OPHN1    | oligophrenin 1                                   | chrXq12              | endocytosis                                    | ---                                           | 1.02          | -1.01           | -1.04     | 1.00        | 1.01      | 1.08        | -1.01      | 1.01         | -1.16      | -1.13        | -1.32      | -1.32        |
| OPN3     | opsin 3                                          | chr1q43              | signal transduction                            | GPCRDB_Class_A_Rhodopsin-like // GenMAP       | -1.03         | 1.00            | 1.05      | 1.10        | 1.04      | 1.06        | 1.10       | 1.10         | 1.20       | 1.20         | -1.03      | 1.03         |
| OPN3     | opsin 3                                          | chr1q43              | signal transduction                            | GPCRDB_Class_A_Rhodopsin-like // GenMAP       | 1.04          | 1.01            | -1.08     | -1.03       | -1.01     | 1.02        | 1.41       | 1.18         | 1.52       | 1.48         | 1.11       | 1.11         |
| OPTN     | optineurin                                       | chr10p13             | protein targeting to Golgi                     | ---                                           | -1.08         | -1.11           | 1.07      | 1.01        | 1.08      | -1.02       | 1.35       | 1.18         | 1.36       | 1.15         | 1.27       | 1.41         |
| OPTN     | optineurin                                       | chr10p13             | protein targeting to Golgi                     | ---                                           | 1.11          | 1.06            | -1.23     | -1.12       | -1.13     | -1.08       | -1.09      | -1.11        | -1.68      | -1.45        | -1.60      | -1.69        |

| ID       | Gene Title                                               | Chromosomal Location | 1st Gene Ontology Biological Process                                 | Pathway                               | A2497 30 mins | A2497P' 30 mins | A2497 2 h | A2497P' 2 h | A2497 4 h | A2497P' 4 h | A2497 24 h | A2497P' 24 h | A2497 48 h | A2497P' 48 h | A2497 72 h | A2497P' 72 h |
|----------|----------------------------------------------------------|----------------------|----------------------------------------------------------------------|---------------------------------------|---------------|-----------------|-----------|-------------|-----------|-------------|------------|--------------|------------|--------------|------------|--------------|
| OR10H3   | olfactory receptor, family 1                             | chr19p13.1           | signal transduction                                                  | ---                                   | -2.17         | 1.06            | -1.17     | 1.20        | -1.48     | -1.15       | -1.71      | -1.77        | 15.67      | 4.48         | 1.54       | 1.01         |
| OR2B2    | olfactory receptor, family 2                             | chr6p22.3-p21.3      | signal transduction                                                  | ---                                   | -1.19         | -1.36           | 1.12      | -1.14       | 2.01      | 1.35        | -1.03      | 1.28         | 1.58       | 1.09         | 1.03       | 1.45         |
| OR2F2    | olfactory receptor, family 2                             | chr7q35              | signal transduction                                                  | ---                                   | -1.27         | -3.16           | 1.25      | -4.00       | -7.49     | -3.45       | -1.45      | 1.35         | 9.17       | 6.68         | -2.21      | 1.22         |
| OR2H1    | olfactory receptor, family 2                             | chr6p21.32           | signal transduction                                                  | GPCRDB_Class_A_Rhodopsin-like // GenM | 1.77          | 2.27            | 1.22      | -2.36       | -3.59     | -4.19       | -1.16      | -1.85        | -1.90      | 1.20         | 6.41       | 1.87         |
| OR4D2    | olfactory receptor, family 4                             | chr17q22             | signal transduction                                                  | ---                                   | -1.30         | -1.18           | -1.16     | -1.60       | -2.87     | -1.33       | 1.15       | 1.15         | 8.56       | 12.08        | -3.14      | -1.64        |
| OR51B2   | olfactory receptor, family 5                             | chr11p15             | signal transduction                                                  | ---                                   | -1.04         | -1.32           | 1.04      | 1.17        | 1.60      | -1.00       | -1.58      | -1.87        | 16.59      | 9.65         | -1.58      | -1.14        |
| OR51B5   | olfactory receptor, family 5                             | chr11p15.4           | signal transduction                                                  | ---                                   | 1.01          | 1.12            | 2.13      | 1.53        | -1.50     | -1.38       | -1.44      | 1.70         | 1.15       | -1.09        | 2.71       | 2.00         |
| OR52D1   | olfactory receptor, family 5                             | chr11p15.4           | signal transduction                                                  | ---                                   | -1.00         | 1.00            | 1.41      | -1.34       | 1.43      | 1.36        | 1.28       | -1.39        | 1.94       | -1.40        | 1.25       | 1.73         |
| OR5P3    | olfactory receptor, family 5                             | chr11p15.4           | signal transduction                                                  | ---                                   | 1.11          | 2.21            | -3.79     | -2.42       | 2.06      | -6.48       | -1.24      | -1.33        | -5.62      | -1.30        | 6.21       | 5.19         |
| OR7E12P  | olfactory receptor, family 7                             | chr11p15             | 0                                                                    | ---                                   | -1.01         | 1.03            | 1.02      | 1.09        | 1.32      | 1.17        | 1.05       | 1.11         | -1.55      | -1.86        | -2.59      | -3.08        |
| OR7E37P  | olfactory receptor, family 7                             | ---                  | 0                                                                    | ---                                   | 1.05          | 1.03            | 1.04      | 1.07        | 1.02      | -1.16       | 1.07       | 1.03         | 1.62       | 1.44         | -1.51      | -1.73        |
| OR8D2    | olfactory receptor, family 8                             | chr11q24.2           | signal transduction                                                  | ---                                   | 2.48          | 3.32            | 2.23      | 2.56        | 2.37      | 4.01        | -2.10      | 1.57         | -1.54      | -2.96        | -1.60      | 1.14         |
| ORAI1    | ORAI calcium release-activated calcium channel subunit 1 | chr12q24.31          | store-operated calcium entry                                         | ---                                   | -1.12         | -1.24           | -1.20     | -1.31       | 1.08      | -1.07       | 1.11       | 1.39         | 1.89       | 1.31         | 2.22       | 1.72         |
| ORAI2    | ORAI calcium release-activated calcium channel subunit 2 | chr7q22.1            | 0                                                                    | ---                                   | -1.10         | -1.17           | -1.04     | 1.18        | -1.25     | -1.08       | -1.29      | -1.17        | -1.09      | 1.03         | -1.54      | 1.09         |
| ORAI2    | ORAI calcium release-activated calcium channel subunit 2 | chr7q22.1            | 0                                                                    | ---                                   | -1.10         | -1.13           | 1.09      | 1.13        | -1.09     | -1.08       | -1.26      | -1.04        | -1.34      | -1.38        | -1.60      | -1.29        |
| ORAI2    | ORAI calcium release-activated calcium channel subunit 2 | chr7q22.1            | 0                                                                    | ---                                   | -1.38         | -1.20           | 1.12      | 1.18        | -1.03     | 1.03        | -1.25      | -1.10        | -1.51      | -1.10        | -1.85      | -1.39        |
| ORAI3    | ORAI calcium release-activated calcium channel subunit 3 | chr16p11.2           | 0                                                                    | ---                                   | -1.05         | -1.21           | 1.09      | 1.10        | 1.01      | -1.04       | 1.21       | 1.05         | 1.36       | 1.52         | 1.13       | 1.49         |
| ORAOV1   | oral cancer overexpressed 1                              | chr11q13.3           | 0                                                                    | ---                                   | 1.23          | -1.00           | 1.09      | -1.16       | -1.08     | 1.15        | -1.31      | -1.24        | -1.84      | -1.77        | -1.07      | -1.14        |
| ORAOV1   | oral cancer overexpressed 1                              | chr11q13.3           | 0                                                                    | ---                                   | -1.09         | 1.15            | -1.10     | -1.14       | 1.10      | 1.07        | 1.09       | 1.22         | -1.12      | 1.26         | -1.40      | -1.64        |
| ORC2     | origin recognition complex subunit 2                     | chr2q33              | cell cycle checkpoint                                                | Cell_cycle_KEGG // GenMAPP /// DNA_re | -1.03         | 1.04            | -1.14     | -1.09       | 1.01      | 1.06        | -1.01      | -1.04        | -1.29      | -1.30        | 1.23       | 1.18         |
| ORC2     | origin recognition complex subunit 2                     | chr2q33              | cell cycle checkpoint                                                | Cell_cycle_KEGG // GenMAPP /// DNA_re | -1.01         | 1.04            | 1.06      | 1.11        | 1.01      | 1.01        | -1.28      | -1.13        | -1.70      | -1.36        | -1.48      | -1.48        |
| ORC3     | origin recognition complex subunit 3                     | chr6q14.3-q16.1      | cell cycle checkpoint                                                | Cell_cycle_KEGG // GenMAPP /// DNA_re | -1.14         | -1.13           | 1.03      | 1.04        | 1.02      | -1.06       | 1.13       | 1.01         | -1.32      | -1.21        | -1.13      | 1.01         |
| ORC4     | origin recognition complex subunit 4                     | chr2q22-q23          | cell cycle checkpoint                                                | Cell_cycle_KEGG // GenMAPP /// DNA_re | 1.06          | 1.05            | -1.01     | -1.00       | 1.03      | -1.00       | -1.22      | -1.19        | -1.16      | -1.34        | 1.13       | 1.06         |
| ORC4     | origin recognition complex subunit 4                     | chr2q22-q23          | cell cycle checkpoint                                                | Cell_cycle_KEGG // GenMAPP /// DNA_re | -1.03         | 1.11            | 1.08      | -1.04       | 1.03      | -1.02       | -1.25      | -1.05        | -1.74      | -1.49        | -1.52      | -1.40        |
| ORC5     | origin recognition complex subunit 5                     | chr7q22.1            | cell cycle checkpoint                                                | Cell_cycle_KEGG // GenMAPP /// DNA_re | 1.01          | 1.02            | 1.17      | 1.03        | 1.11      | 1.14        | -1.13      | -1.24        | -1.40      | -1.36        | -1.08      | -1.16        |
| ORC5     | origin recognition complex subunit 5                     | chr7q22.1            | cell cycle checkpoint                                                | Cell_cycle_KEGG // GenMAPP /// DNA_re | -1.02         | -1.02           | 1.12      | 1.06        | 1.10      | -1.05       | -1.02      | -1.13        | -1.10      | -1.26        | 1.03       | 1.14         |
| ORC6     | origin recognition complex subunit 6                     | chr16q12             | cell cycle checkpoint                                                | Cell_cycle_KEGG // GenMAPP /// DNA_re | -1.00         | 1.04            | 1.04      | 1.04        | -1.08     | -1.23       | -1.05      | -1.06        | 1.12       | 1.08         | 1.14       | 1.12         |
| ORF1     | uncharacterized protein, chr18q23                        | 0                    | ---                                                                  | ---                                   | -1.10         | -1.10           | 1.52      | 1.43        | -1.25     | -1.04       | 1.43       | 1.50         | -1.27      | 2.73         | 1.05       | -1.15        |
| ORMDL1   | ORM1-like 1 (S. cerevisiae)                              | chr2q32              | ceramide metabolic process                                           | ---                                   | -1.00         | 1.03            | 1.02      | -1.24       | 1.06      | -1.03       | -1.46      | -1.28        | -1.61      | -1.47        | -1.05      | -1.16        |
| ORMDL1   | ORM1-like 1 (S. cerevisiae)                              | chr2q32              | ceramide metabolic process                                           | ---                                   | -1.02         | -1.03           | -1.02     | 1.03        | 1.05      | 1.02        | -1.08      | -1.13        | -1.05      | 1.02         | 1.21       | 1.29         |
| OSBP     | oxysterol binding protein                                | chr11q12-q13         | transport                                                            | ---                                   | 1.38          | 1.20            | -1.09     | -1.14       | 1.09      | 1.48        | 1.39       | 1.27         | -1.84      | -1.82        | -2.33      | -1.78        |
| OSBP     | oxysterol binding protein                                | chr11q12-q13         | transport                                                            | ---                                   | -1.05         | 1.00            | 1.03      | -1.08       | 1.08      | -1.01       | 1.14       | 1.02         | 1.21       | 1.11         | 1.35       | 1.29         |
| OSBP2    | oxysterol binding protein 2                              | chr22q12.2           | transport                                                            | ---                                   | -1.03         | -1.21           | 1.20      | 1.12        | 1.10      | 1.10        | 1.21       | 1.02         | 1.13       | 1.00         | 1.48       | 1.58         |
| OSBP2    | oxysterol binding protein 2                              | chr22q12.2           | transport                                                            | ---                                   | 1.00          | -1.06           | 1.23      | 1.07        | 1.07      | 1.16        | 1.00       | -1.00        | 1.11       | 1.33         | 1.41       | 1.44         |
| OSBP2    | oxysterol binding protein 2                              | chr22q12.2           | transport                                                            | ---                                   | 1.27          | 1.09            | 1.09      | 1.16        | -1.04     | -1.08       | -1.20      | -1.14        | 1.23       | 1.08         | 1.71       | 1.89         |
| OSBPL10  | oxysterol binding protein-like 10                        | chr3p22.3            | transport                                                            | ---                                   | 1.13          | 1.12            | 1.03      | -1.11       | -1.03     | -1.03       | 1.09       | 1.07         | 1.03       | 1.07         | 1.24       | 1.11         |
| OSBPL10  | oxysterol binding protein-like 10                        | chr3p22.3            | transport                                                            | ---                                   | 1.21          | 1.39            | 1.18      | 1.15        | 1.31      | 1.01        | 1.39       | 1.31         | 1.38       | 1.05         | 1.87       | 1.71         |
| OSBPL11  | oxysterol binding protein-like 11                        | chr3q21              | transport                                                            | ---                                   | 1.26          | 1.23            | 1.06      | -1.08       | -1.06     | -1.01       | -1.11      | -1.12        | -1.28      | -1.15        | -1.22      | -1.39        |
| OSBPL1A  | oxysterol binding protein-like 1A                        | chr18q11.1           | transport                                                            | ---                                   | -1.19         | -1.12           | 1.03      | 1.03        | 1.07      | -1.07       | 1.22       | 1.06         | 1.04       | 1.05         | -1.70      | -1.56        |
| OSBPL1A  | oxysterol binding protein-like 1A                        | chr18q11.1           | transport                                                            | ---                                   | -1.01         | -1.10           | 1.01      | 1.24        | -1.04     | 1.19        | -1.15      | -1.12        | -1.64      | -1.04        | -1.78      | -1.67        |
| OSBPL2   | oxysterol binding protein-like 2                         | chr20q13.3           | transport                                                            | ---                                   | 1.12          | 1.11            | 1.05      | -1.09       | -1.14     | -1.11       | 1.05       | -1.01        | -1.61      | -1.43        | -1.24      | -1.47        |
| OSBPL2   | oxysterol binding protein-like 2                         | chr20q13.3           | transport                                                            | ---                                   | -1.10         | 1.04            | 1.10      | 1.19        | 1.16      | -1.08       | 1.31       | 1.33         | 1.82       | 1.73         | 1.57       | 1.83         |
| OSBPL3   | oxysterol binding protein-like 3                         | chr7p15              | transport                                                            | ---                                   | -1.11         | -1.05           | 1.11      | -1.06       | 1.11      | -1.08       | 1.40       | 1.21         | 1.42       | 1.35         | 2.44       | 2.12         |
| OSBPL3   | oxysterol binding protein-like 3                         | chr7p15              | transport                                                            | ---                                   | 1.11          | 1.10            | -1.05     | -1.18       | 1.09      | 1.25        | -1.18      | -1.11        | -1.65      | -1.49        | -1.17      | -1.47        |
| OSBPL5   | oxysterol binding protein-like 5                         | chr11p15.4           | transport                                                            | ---                                   | -1.11         | -1.12           | 1.27      | 1.11        | -1.12     | -1.07       | -1.40      | 1.01         | 1.42       | 1.37         | 1.07       | 1.73         |
| OSBPL5   | oxysterol binding protein-like 5                         | chr11p15.4           | transport                                                            | ---                                   | -1.05         | -1.16           | 1.03      | 1.26        | 1.09      | 1.04        | -1.04      | 1.16         | 2.42       | 2.00         | 2.54       | 2.55         |
| OSBPL6   | oxysterol binding protein-like 6                         | chr2q32.1            | transport                                                            | ---                                   | -1.07         | 1.19            | 1.15      | 1.20        | 1.31      | 1.23        | -1.60      | -1.25        | 1.92       | 1.71         | 1.13       | 1.22         |
| OSCAR    | osteoclast associated, immunoglobulin-like               | chr19q13.42          | 0                                                                    | ---                                   | -1.18         | -1.09           | -1.10     | -1.25       | 1.42      | 1.75        | -1.05      | -1.07        | 7.76       | 4.79         | 6.90       | 6.12         |
| OSCP1    | organic solute carrier partner 1                         | chr1p34.3            | transport                                                            | ---                                   | -1.32         | -1.28           | -1.12     | 1.14        | 1.31      | 1.04        | 1.23       | 1.14         | -1.29      | -1.59        | -2.01      | -1.55        |
| OSER1    | oxidative stress responsive 1                            | chr20q13.11          | 0                                                                    | ---                                   | 1.22          | 1.05            | 1.21      | 1.09        | 1.01      | 1.05        | 1.12       | -1.06        | -1.60      | -1.39        | -1.17      | -1.34        |
| OSER1    | oxidative stress responsive 1                            | chr20q13.11          | 0                                                                    | ---                                   | 1.01          | -1.08           | 1.00      | 1.10        | 1.11      | -1.05       | 1.13       | 1.02         | 1.15       | 1.12         | 1.73       | 1.65         |
| OSGEP    | O-sialoglycoprotein endopeptidase                        | chr14q11.2           | tRNA processing                                                      | ---                                   | -1.06         | -1.05           | 1.07      | 1.01        | 1.09      | 1.06        | 1.04       | -1.05        | -1.72      | -1.49        | -2.56      | -2.45        |
| OSGEP1   | O-sialoglycoprotein endopeptidase 1                      | chr2q32.2            | tRNA processing                                                      | ---                                   | 1.14          | 1.10            | 1.01      | -1.06       | 1.13      | 1.03        | -1.09      | -1.22        | -1.39      | -1.51        | -1.02      | -1.12        |
| OSGEP1   | O-sialoglycoprotein endopeptidase 1                      | chr2q32.2            | tRNA processing                                                      | ---                                   | -1.02         | -1.04           | 1.12      | 1.08        | 1.13      | 1.07        | -1.09      | -1.13        | -1.58      | -1.50        | -1.25      | -1.39        |
| OSGIN1   | oxidative stress induced growth factor 1                 | chr16q23.3           | multicellular organismal development                                 | ---                                   | 1.06          | -1.24           | -1.60     | -1.07       | -1.04     | -1.35       | 1.49       | 1.31         | 10.57      | 9.33         | 3.35       | 3.53         |
| OSGIN2   | oxidative stress induced growth factor 2                 | chr8q21              | meiosis                                                              | ---                                   | 1.05          | 1.06            | 1.04      | 1.33        | 1.04      | 1.03        | 1.31       | 1.22         | 1.45       | 1.27         | 1.40       | 1.32         |
| OSMR     | oncostatin M receptor                                    | chr5p13.1            | positive regulation of acute inflammatory response                   | ---                                   | 1.15          | 1.05            | 1.12      | 1.12        | 1.06      | -1.06       | 1.40       | 1.22         | 4.83       | 4.11         | 4.41       | 4.68         |
| OSR2     | odd-skipped related 2 (Drosophila)                       | chr8q22.2            | negative regulation of transcription from RNA polymerase II promoter | ---                                   | 1.16          | 1.23            | 1.21      | 1.19        | 1.02      | 1.07        | -1.56      | -1.45        | -1.37      | -1.83        | -1.22      | -1.35        |
| OST4     | oligosaccharyl transferase 4                             | chr2p23.3            | 0                                                                    | ---                                   | -1.04         | 1.01            | -1.03     | -1.03       | 1.00      | -1.05       | 1.09       | 1.02         | 1.21       | 1.16         | 1.13       | 1.17         |
| OSTC     | oligosaccharyl transferase 4                             | chr4q25              | protein N-linked glycosylation via asparagine                        | ---                                   | 1.18          | 1.06            | 1.03      | 1.06        | -1.01     | 1.05        | -1.08      | -1.11        | 1.07       | 1.09         | 1.27       | 1.24         |
| OSTF1    | osteoclast stimulating factor 1                          | chr9q13-q21.2        | ossification                                                         | ---                                   | 1.57          | 1.38            | 1.13      | 1.28        | 1.05      | -1.17       | 1.17       | 1.41         | 1.55       | 1.29         | 1.60       | 1.13         |
| OSTM1    | osteopetrosis associated transmembrane protein 1         | chr6q21              | osteoclast differentiation                                           | ---                                   | 1.18          | 1.20            | 1.10      | -1.22       | -1.15     | -1.12       | -1.06      | -1.00        | 1.09       | 1.52         | -1.01      | -1.28        |
| OSTM1    | osteopetrosis associated transmembrane protein 1         | chr6q21              | osteoclast differentiation                                           | ---                                   | 1.10          | 1.15            | 1.26      | 1.01        | -1.16     | 1.13        | -1.15      | 1.30         | 1.05       | 1.68         | -1.21      | -1.13        |
| OTOP2    | otopetrin 2                                              | chr17q25.1           | 0                                                                    | ---                                   | -1.73         | -1.19           | -2.42     | 1.03        | -2.15     | 1.45        | -5.45      | -7.86        | 2.13       | -1.58        | -1.59      | -1.98        |
| OTTHUMG0 | NULL /// NULL                                            | ---                  | 0                                                                    | ---                                   | 1.10          | -1.34           | -1.35     | -1.26       | -1.28     | -2.16       | -1.03      | -1.28        | 3.65       | 3.07         | 4.48       | 5.30         |
| OTTHUMG0 | NULL /// NULL                                            | ---                  | 0                                                                    | ---                                   | 1.09          | -1.03           | 1.49      | 1.32        | 1.08      | 1.21        | 1.36       | -1.66        | 3.70       | 1.70         | -3.61      | -1.98        |

| ID       | Gene Title             | Chromosomal Location | 1st Gene Ontology Biological Process | Pathway | A2497 30 mins | A2497P' 30 mins | A2497 2 h | A2497P' 2 h | A2497 4 h | A2497P' 4 h | A2497 24 h | A2497P' 24 h | A2497 48 h | A2497P' 48 h | A2497 72 h | A2497P' 72 h |
|----------|------------------------|----------------------|--------------------------------------|---------|---------------|-----------------|-----------|-------------|-----------|-------------|------------|--------------|------------|--------------|------------|--------------|
| OTTHUMG0 | NULL /// NULL          | ---                  | 0                                    | ---     | 1.13          | -1.46           | 1.09      | 1.19        | 1.55      | 1.86        | -1.12      | -1.73        | 1.42       | -1.10        | 1.78       | 2.14         |
| OTTHUMG0 | NULL /// NULL          | ---                  | 0                                    | ---     | 1.25          | -1.13           | -1.69     | 1.24        | 1.04      | -1.13       | 1.32       | 1.87         | 1.22       | 1.13         | 4.42       | 2.38         |
| OTTHUMG0 | NULL /// NULL          | ---                  | 0                                    | ---     | -1.26         | 1.23            | -1.20     | 1.21        | -1.44     | -1.67       | -4.37      | -3.17        | -1.36      | -3.08        | 1.62       | -3.81        |
| OTTHUMG0 | NULL /// NULL          | ---                  | 0                                    | ---     | 1.20          | 1.08            | -1.11     | 1.26        | -1.15     | 1.11        | 1.10       | 1.62         | 1.88       | 1.36         | 1.38       |              |
| OTTHUMG0 | NULL /// NULL          | ---                  | 0                                    | ---     | 1.34          | 1.26            | -1.49     | -1.09       | 1.33      | -1.74       | -2.14      | -1.18        | 1.69       | 1.63         | -1.42      | -1.77        |
| OTTHUMG0 | NULL /// NULL          | ---                  | 0                                    | ---     | -1.39         | 1.13            | 1.10      | 1.63        | 1.19      | -1.18       | 1.76       | 1.29         | 2.30       | 2.01         | 2.88       | 3.49         |
| OTTHUMG0 | NULL /// NULL          | ---                  | 0                                    | ---     | 1.11          | -1.05           | 1.17      | 1.06        | 1.04      | 1.01        | 1.10       | 1.02         | -1.16      | -1.38        | 1.03       | 1.01         |
| OTTHUMG0 | NULL /// NULL          | ---                  | 0                                    | ---     | -1.07         | -1.03           | -1.04     | -1.04       | -1.05     | -1.03       | 1.07       | -1.05        | 1.29       | 1.13         | -1.01      | -1.03        |
| OTTHUMG0 | NULL /// NULL          | ---                  | 0                                    | ---     | 1.35          | 1.20            | -3.93     | -3.73       | 5.01      | 1.94        | -2.19      | -4.56        | -3.58      | 1.18         | -5.10      | 1.43         |
| OTTHUMG0 | NULL /// NULL          | ---                  | 0                                    | ---     | 1.13          | 1.11            | -1.07     | -1.14       | -1.01     | 1.23        | -1.19      | -1.00        | -2.86      | -2.72        | -1.77      | -1.79        |
| OTTHUMG0 | NULL /// NULL          | ---                  | 0                                    | ---     | -1.14         | -1.25           | -1.24     | -1.08       | 1.08      | -1.12       | 1.00       | -1.07        | 1.12       | 1.09         | 1.37       | 1.66         |
| OTTHUMG0 | NULL /// NULL          | ---                  | 0                                    | ---     | -1.21         | 1.13            | 1.32      | 1.25        | 1.32      | 1.51        | -1.12      | -1.01        | 1.25       | 1.52         | -2.64      | -2.29        |
| OTTHUMG0 | NULL /// NULL          | ---                  | 0                                    | ---     | 1.62          | -1.11           | -1.20     | -1.10       | 1.06      | -1.08       | 1.11       | 1.55         | -2.66      | -1.68        | -3.74      | -3.43        |
| OTTHUMG0 | NULL /// NULL          | ---                  | 0                                    | ---     | -1.18         | -1.33           | -1.01     | 1.23        | -1.56     | -1.14       | -1.01      | -1.19        | -1.12      | 1.02         | -2.04      | -1.69        |
| OTTHUMG0 | NULL /// NULL          | ---                  | 0                                    | ---     | 1.51          | 1.36            | 1.23      | 1.42        | -1.53     | -1.14       | -1.07      | 1.29         | 1.11       | 1.24         | -1.27      | -1.19        |
| OTTHUMG0 | NULL /// NULL          | ---                  | 0                                    | ---     | -1.16         | -1.13           | 1.48      | 1.28        | -1.07     | 1.24        | -1.26      | 1.03         | 1.19       | 1.14         | 1.26       | 2.02         |
| OTTHUMG0 | NULL /// NULL          | ---                  | 0                                    | ---     | 1.34          | -1.30           | -1.01     | 1.19        | 1.50      | 3.79        | 1.28       | 1.93         | -1.05      | -1.26        | 8.90       | 14.13        |
| OTTHUMG0 | NULL /// NULL          | ---                  | 0                                    | ---     | 1.86          | 1.80            | 1.52      | 1.70        | 2.06      | 1.50        | 1.69       | 1.44         | 1.24       | 1.94         | 2.36       | 2.48         |
| OTTHUMG0 | NULL /// NULL          | ---                  | 0                                    | ---     | -1.96         | -1.65           | 1.07      | -1.25       | -1.11     | 1.38        | 1.00       | -1.03        | 1.42       | -1.20        | -1.69      | -1.75        |
| OTTHUMG0 | NULL /// NULL          | ---                  | 0                                    | ---     | 1.13          | -1.25           | -1.11     | -1.13       | -1.08     | 1.02        | 1.13       | -1.04        | 1.34       | 1.69         | -1.34      | -1.42        |
| OTTHUMG0 | NULL /// NULL          | ---                  | 0                                    | ---     | 2.00          | 3.36            | 2.00      | 2.92        | 1.16      | -1.10       | 1.55       | 4.28         | -3.61      | -15.96       | -3.33      | 1.26         |
| OTTHUMG0 | NULL /// NULL          | ---                  | 0                                    | ---     | 1.14          | 1.03            | -1.38     | -1.10       | 1.01      | 2.12        | -1.04      | 1.11         | -1.02      | -1.42        | 1.83       | 3.27         |
| OTTHUMG0 | NULL /// NULL          | ---                  | 0                                    | ---     | -1.25         | -1.36           | 1.35      | -1.10       | 1.30      | 1.04        | 1.18       | 1.15         | 1.74       | 1.87         | 4.47       | 2.74         |
| OTTHUMG0 | NULL /// NULL          | ---                  | 0                                    | ---     | 1.01          | -1.62           | 1.41      | -3.34       | 1.08      | 1.31        | 2.06       | 1.46         | 6.41       | 2.00         | 2.64       | 2.16         |
| OTTHUMG0 | NULL /// NULL          | ---                  | 0                                    | ---     | -1.05         | -1.20           | -1.10     | 1.12        | 1.28      | 1.02        | -1.12      | -1.14        | -2.46      | -2.78        | -2.11      | -2.69        |
| OTTHUMG0 | NULL /// NULL          | ---                  | 0                                    | ---     | 1.34          | 1.08            | -1.14     | -1.15       | 1.24      | 1.18        | 1.24       | -1.04        | -1.32      | -1.90        | -2.10      | -1.68        |
| OTTHUMG0 | NULL /// NULL          | ---                  | 0                                    | ---     | -1.26         | -2.19           | -1.50     | -1.67       | -2.71     | -1.11       | 1.20       | 1.25         | 2.04       | 1.80         | 2.35       | 1.42         |
| OTTHUMG0 | NULL /// NULL          | ---                  | 0                                    | ---     | 1.16          | 1.05            | -1.03     | -1.03       | -1.09     | 1.07        | -1.06      | -1.04        | -2.17      | -1.75        | -1.86      | -1.67        |
| OTTHUMG0 | NULL /// NULL          | ---                  | 0                                    | ---     | 1.05          | -1.59           | -1.25     | -1.14       | -1.32     | -1.03       | -1.20      | 1.40         | -15.09     | -16.23       | -8.76      | -1.86        |
| OTTHUMG0 | NULL /// NULL          | ---                  | 0                                    | ---     | 1.53          | 1.52            | 3.37      | -1.01       | 2.35      | -1.31       | -1.34      | -1.13        | 11.98      | 7.55         | 3.49       | 2.68         |
| OTTHUMG0 | NULL /// NULL          | ---                  | 0                                    | ---     | 1.01          | 1.03            | -1.07     | -1.02       | -1.03     | 1.03        | -1.02      | 1.05         | -1.54      | -1.18        | -1.77      | -1.61        |
| OTTHUMG0 | NULL /// NULL          | ---                  | 0                                    | ---     | 1.08          | -1.04           | -1.27     | -1.03       | -1.03     | -1.16       | -1.40      | -1.20        | -1.22      | -1.11        | 1.32       | 1.16         |
| OTTHUMG0 | NULL /// NULL          | ---                  | 0                                    | ---     | 2.52          | 3.15            | -1.10     | 1.22        | -2.61     | -1.16       | 1.44       | 5.62         | 1.71       | 11.76        | 10.12      |              |
| OTTHUMG0 | NULL /// NULL          | ---                  | 0                                    | ---     | 1.27          | 3.92            | 2.83      | -1.27       | -9.67     | -2.41       | -5.04      | 2.53         | 2.91       | 4.41         | 5.28       | 2.53         |
| OTTHUMG0 | NULL /// NULL          | ---                  | 0                                    | ---     | 1.39          | 1.99            | 1.58      | 1.48        | 1.38      | 8.49        | 1.51       | -4.36        | 3.78       | 3.24         | 2.24       | 1.48         |
| OTTHUMG0 | NULL /// NULL          | ---                  | 0                                    | ---     | 3.50          | 6.70            | 2.56      | 2.95        | -2.23     | -3.30       | -1.15      | -1.51        | 4.74       | -1.54        | 1.15       | 2.80         |
| OTTHUMG0 | NULL /// NULL          | ---                  | 0                                    | ---     | -1.17         | 1.55            | -1.13     | 1.31        | -2.18     | 1.06        | 1.01       | 2.18         | 1.26       | 1.02         | 3.19       | 3.54         |
| OTTHUMG0 | NULL /// NULL          | ---                  | 0                                    | ---     | 25.21         | 11.63           | 1.06      | 1.57        | -1.12     | -1.20       | -1.29      | -1.22        | -1.03      | 1.12         | 3.21       | 2.05         |
| OTTHUMG0 | NULL /// NULL          | ---                  | 0                                    | ---     | -1.23         | -1.12           | 2.17      | 1.87        | 1.74      | 1.47        | -1.15      | 1.00         | 6.87       | 4.90         | 6.30       | 9.75         |
| OTTHUMG0 | NULL /// NULL          | ---                  | 0                                    | ---     | -1.03         | -1.08           | 1.16      | 1.12        | -1.03     | -1.25       | 1.63       | 1.31         | 1.25       | -1.14        | 1.28       | 1.05         |
| OTTHUMG0 | NULL /// NULL          | ---                  | 0                                    | ---     | 1.15          | 1.16            | -1.12     | 1.07        | 1.12      | -1.04       | 1.35       | 1.23         | -1.07      | -1.15        | -2.92      | -1.74        |
| OTTHUMG0 | NULL /// NULL          | ---                  | 0                                    | ---     | 1.45          | 1.29            | -1.61     | -1.65       | -2.40     | 1.12        | 1.21       | -1.17        | -1.27      | 1.49         | -2.75      | -1.12        |
| OTTHUMG0 | NULL /// NULL          | ---                  | 0                                    | ---     | 1.39          | 1.57            | -2.24     | -1.15       | 1.68      | 1.44        | 1.89       | 3.21         | 1.80       | 1.09         | 1.20       | -1.47        |
| OTTHUMG0 | NULL /// NULL          | ---                  | 0                                    | ---     | -1.76         | -1.38           | -1.24     | 1.16        | 2.31      | -1.14       | -1.40      | -1.48        | 1.77       | 2.11         | 1.10       | 1.79         |
| OTTHUMG0 | NULL /// NULL /// NULL | ---                  | 0                                    | ---     | -4.87         | -3.61           | -4.25     | -1.41       | -3.96     | -2.84       | 8.74       | 6.93         | 4.40       | 7.01         | 6.10       | 4.86         |
| OTTHUMG0 | NULL /// NULL          | ---                  | 0                                    | ---     | 1.39          | -3.42           | -2.02     | 2.19        | 3.25      | 1.64        | -2.00      | -1.61        | 1.04       | 1.08         | 1.50       | 1.05         |
| OTTHUMG0 | NULL /// NULL          | ---                  | 0                                    | ---     | -1.04         | 1.05            | 1.17      | 1.54        | 1.08      | 1.34        | 1.04       | -1.04        | -1.31      | -1.12        | -2.04      | -1.51        |
| OTTHUMG0 | NULL /// NULL          | ---                  | 0                                    | ---     | 1.11          | 1.06            | 1.14      | 1.10        | 1.04      | 1.09        | -1.40      | -1.15        | -1.66      | -1.83        | -1.25      | -1.25        |
| OTTHUMG0 | NULL /// NULL          | ---                  | 0                                    | ---     | 1.43          | 1.80            | 1.41      | 1.27        | 1.10      | 1.19        | -1.09      | -1.26        | 1.63       | 1.19         | 1.05       | -1.36        |
| OTTHUMG0 | NULL /// NULL          | ---                  | 0                                    | ---     | 1.04          | -1.10           | -1.06     | -1.11       | 1.68      | 1.42        | 1.14       | -1.05        | 1.21       | 1.46         | 1.71       | -1.05        |
| OTTHUMG0 | NULL /// NULL          | ---                  | 0                                    | ---     | 2.03          | 5.35            | -1.53     | 1.58        | 1.46      | 5.12        | 1.13       | 4.45         | 2.52       | 4.85         | 4.28       | 2.53         |
| OTTHUMG0 | NULL /// NULL          | ---                  | 0                                    | ---     | 1.06          | -1.00           | 1.22      | 1.16        | 1.37      | 1.35        | 1.17       | -1.00        | -2.55      | -2.27        | -2.49      | -2.56        |
| OTTHUMG0 | NULL /// NULL          | ---                  | 0                                    | ---     | -1.15         | -1.28           | 1.03      | 1.28        | 1.13      | -1.07       | -1.09      | -1.13        | -1.82      | -1.44        | -1.35      | -1.71        |
| OTTHUMG0 | NULL /// NULL          | ---                  | 0                                    | ---     | 1.19          | 1.01            | 1.16      | 1.22        | 1.14      | 1.08        | -1.09      | 1.48         | 2.68       | 1.70         | 2.85       | 2.31         |
| OTTHUMG0 | NULL /// NULL          | ---                  | 0                                    | ---     | 1.13          | 1.08            | 1.46      | 1.80        | 1.61      | 1.19        | 1.14       | 1.01         | -1.38      | -1.28        | -1.88      | -1.72        |
| OTTHUMG0 | NULL /// NULL          | ---                  | 0                                    | ---     | -1.05         | 1.16            | 1.25      | -1.15       | -1.08     | 1.01        | -1.30      | -1.37        | -2.82      | -1.79        | -2.27      | -3.14        |
| OTTHUMG0 | NULL /// NULL          | ---                  | 0                                    | ---     | 1.12          | -2.22           | -1.18     | 1.62        | 1.03      | 1.20        | -2.09      | -1.26        | 1.16       | 2.07         | 1.40       | 1.77         |
| OTTHUMG0 | NULL /// NULL          | ---                  | 0                                    | ---     | 1.18          | -1.47           | 1.42      | -2.11       | -2.53     | -1.79       | 2.11       | 2.23         | -1.15      | -1.62        | -1.46      | -6.70        |
| OTTHUMG0 | NULL /// NULL          | ---                  | 0                                    | ---     | -1.05         | -2.78           | 1.28      | 2.91        | -6.99     | -2.20       | -1.20      | 1.59         | 4.31       | 2.95         | -2.32      | 1.01         |
| OTTHUMG0 | NULL /// NULL          | ---                  | 0                                    | ---     | -1.50         | -2.19           | -1.26     | -1.04       | 1.61      | 1.72        | 1.61       | 1.15         | -1.25      | -1.66        | -1.62      | 1.02         |
| OTTHUMG0 | NULL /// NULL          | ---                  | 0                                    | ---     | 1.12          | 1.01            | 2.22      | 2.14        | 1.01      | -1.10       | -1.33      | 1.01         | 1.10       | 1.00         | 1.56       | 1.49         |
| OTTHUMG0 | NULL /// NULL          | ---                  | 0                                    | ---     | -1.07         | 1.69            | 1.23      | -1.89       | 1.20      | -1.11       | 1.23       | -1.00        | 3.50       | 3.43         | 3.50       | 3.02         |
| OTTHUMG0 | NULL /// NULL          | ---                  | 0                                    | ---     | -1.02         | 1.05            | 1.03      | 1.01        | -1.05     | 1.03        | -1.01      | -1.07        | -1.15      | -1.19        | -1.49      | -1.45        |
| OTTHUMG0 | NULL /// NULL          | ---                  | 0                                    | ---     | 1.04          | 1.12            | -1.05     | -1.05       | -1.03     | 1.00        | 1.04       | -1.01        | -1.04      | -1.06        | 1.01       | -1.11        |
| OTTHUMG0 | NULL /// NULL          | ---                  | 0                                    | ---     | 1.25          | 1.48            | -1.45     | -1.37       | -1.06     | -1.89       | -1.15      | 1.65         | 1.19       | 1.22         | 1.58       | 2.01         |
| OTTHUMG0 | NULL /// NULL          | ---                  | 0                                    | ---     | 1.10          | 1.12            | 1.10      | -1.02       | -1.06     | -1.08       | 1.04       | -1.08        | -1.23      | -1.49        | -1.94      | -2.30        |

| ID       | Gene Title             | Chromosomal Location | 1st Gene Ontology Biological Process | Pathway | A2497 30 mins | A2497P' 30 mins | A2497 2 h | A2497P' 2 h | A2497 4 h | A2497P' 4 h | A2497 24 h | A2497P' 24 h | A2497 48 h | A2497P' 48 h | A2497 72 h | A2497P' 72 h |
|----------|------------------------|----------------------|--------------------------------------|---------|---------------|-----------------|-----------|-------------|-----------|-------------|------------|--------------|------------|--------------|------------|--------------|
| OTTHUMG0 | NULL /// NULL          | ---                  | 0                                    | ---     | -1.02         | -1.03           | -1.01     | 1.11        | 1.07      | -1.06       | 1.11       | 1.16         | 1.64       | 1.32         | 1.61       | 1.71         |
| OTTHUMG0 | NULL /// NULL          | ---                  | 0                                    | ---     | -1.38         | 1.04            | 1.34      | -1.13       | -1.21     | -1.72       | -1.12      | -1.01        | -2.29      | -1.72        | -3.16      | -4.08        |
| OTTHUMG0 | NULL /// NULL          | ---                  | 0                                    | ---     | 1.29          | 1.02            | -1.27     | -1.10       | -1.42     | -1.18       | -1.11      | -1.15        | -1.27      | -1.49        | -2.05      | -1.48        |
| OTTHUMG0 | NULL /// NULL          | ---                  | 0                                    | ---     | -2.93         | 1.70            | 1.15      | -2.17       | 1.74      | -1.63       | 1.26       | 2.22         | 4.77       | 2.09         | -1.31      | -1.26        |
| OTTHUMG0 | NULL /// NULL          | ---                  | 0                                    | ---     | -1.30         | -1.18           | 1.07      | 1.75        | 1.41      | 1.24        | -1.91      | -1.24        | -4.10      | -3.49        | -1.96      | -2.32        |
| OTTHUMG0 | NULL /// NULL          | ---                  | 0                                    | ---     | -1.22         | -1.33           | -1.20     | -1.17       | 1.01      | -1.59       | 1.07       | 1.39         | -2.20      | -2.21        | -1.15      | -1.18        |
| OTTHUMG0 | NULL /// NULL /// NULL | ---                  | 0                                    | ---     | 1.02          | 1.17            | 1.06      | -1.14       | 1.18      | 1.24        | -1.42      | 1.03         | -2.32      | -2.12        | -2.16      | -1.87        |
| OTTHUMG0 | NULL /// NULL          | ---                  | 0                                    | ---     | 2.44          | 1.52            | 1.64      | 1.78        | 1.49      | 1.18        | -1.23      | -2.99        | 2.14       | -1.64        | 2.54       | 3.42         |
| OTTHUMG0 | NULL /// NULL          | ---                  | 0                                    | ---     | -1.31         | 1.11            | -1.84     | -1.36       | -1.51     | -1.00       | 1.18       | -1.43        | 2.59       | 1.54         | 3.16       | 4.53         |
| OTTHUMG0 | NULL /// NULL          | ---                  | 0                                    | ---     | 1.04          | -1.04           | -1.11     | -1.58       | -1.27     | -1.06       | -1.30      | -1.31        | -1.43      | -1.26        | -1.03      | 1.06         |
| OTTHUMG0 | NULL /// NULL          | ---                  | 0                                    | ---     | 1.13          | -1.05           | -1.20     | -1.04       | 1.04      | 1.01        | 1.29       | 1.45         | 1.27       | 1.30         | 1.21       | 1.45         |
| OTTHUMG0 | NULL /// NULL          | ---                  | 0                                    | ---     | 1.16          | 1.16            | 1.24      | 1.33        | -1.29     | -1.02       | 1.15       | 1.04         | -1.75      | -1.69        | -2.77      | -2.01        |
| OTTHUMG0 | NULL /// NULL          | ---                  | 0                                    | ---     | 1.52          | -2.53           | 1.21      | 1.02        | 1.49      | -1.17       | 2.43       | 1.85         | 1.16       | -1.06        | 1.51       | 1.48         |
| OTTHUMG0 | NULL /// NULL          | ---                  | 0                                    | ---     | 1.11          | 1.01            | -1.05     | 1.18        | -1.04     | 1.08        | -1.08      | -1.01        | -1.17      | -1.35        | 1.43       | 1.24         |
| OTTHUMG0 | NULL /// NULL          | ---                  | 0                                    | ---     | 1.02          | -1.79           | 1.47      | -1.03       | -1.27     | -1.35       | -1.54      | -1.22        | -2.53      | -1.36        | 1.43       | 2.06         |
| OTTHUMG0 | NULL /// NULL          | ---                  | 0                                    | ---     | 2.31          | 1.83            | -3.27     | -1.10       | -3.04     | -3.69       | -1.17      | 1.94         | 2.53       | 4.58         | -1.03      | 3.55         |
| OTTHUMG0 | NULL /// NULL          | ---                  | 0                                    | ---     | 1.11          | -1.03           | -1.19     | 1.30        | 1.35      | 1.14        | 1.45       | 1.09         | -1.57      | -2.08        | -1.29      | -1.67        |
| OTTHUMG0 | NULL /// NULL          | ---                  | 0                                    | ---     | 1.01          | 1.03            | 1.10      | 1.14        | 1.05      | 1.26        | -1.01      | 1.22         | -2.12      | -2.21        | -1.82      | -1.86        |
| OTTHUMG0 | NULL /// NULL          | ---                  | 0                                    | ---     | -1.16         | -1.87           | 1.34      | 1.57        | -2.01     | 1.18        | 1.58       | 2.11         | -2.97      | -2.35        | -1.96      | 1.01         |
| OTTHUMG0 | NULL /// NULL          | ---                  | 0                                    | ---     | 1.48          | 1.13            | 1.22      | -1.20       | 1.14      | -1.31       | 1.41       | 1.39         | 1.67       | 1.33         | 1.38       | 1.49         |
| OTTHUMG0 | NULL /// NULL          | ---                  | 0                                    | ---     | 1.20          | 1.09            | 1.03      | -1.23       | 1.52      | 1.21        | -1.11      | 1.06         | -1.13      | -1.22        | -3.13      | -3.15        |
| OTTHUMG0 | NULL /// NULL          | ---                  | 0                                    | ---     | -1.30         | -1.26           | -1.19     | 1.29        | 1.18      | -1.46       | -1.38      | -1.34        | -1.65      | 1.23         | -2.73      | -1.02        |
| OTTHUMG0 | NULL /// NULL          | ---                  | 0                                    | ---     | -2.65         | -2.71           | -1.59     | -1.15       | -2.52     | -3.03       | 4.78       | 2.15         | 1.95       | 4.36         | -1.15      | -2.49        |
| OTTHUMG0 | NULL /// NULL          | ---                  | 0                                    | ---     | -1.91         | 1.28            | -1.33     | -1.91       | -1.15     | 1.80        | -1.06      | 1.26         | 2.76       | 1.61         | 1.02       | -1.29        |
| OTTHUMG0 | NULL /// NULL          | ---                  | 0                                    | ---     | 1.10          | 1.04            | 1.18      | 1.24        | -1.07     | -1.11       | 1.14       | 1.21         | 1.41       | 1.36         | 1.05       | 1.16         |
| OTTHUMG0 | NULL /// NULL          | ---                  | 0                                    | ---     | 1.16          | 1.76            | -2.62     | 1.45        | -1.60     | -9.82       | 2.42       | 4.78         | 4.50       | 6.73         | 1.58       | 2.35         |
| OTTHUMG0 | NULL /// NULL          | ---                  | 0                                    | ---     | 1.05          | 1.08            | 1.15      | 1.01        | -1.11     | -1.20       | -1.17      | -1.02        | 1.36       | 1.64         | 1.47       | 1.58         |
| OTTHUMG0 | NULL /// NULL          | ---                  | 0                                    | ---     | 1.20          | -1.15           | 6.41      | 4.39        | -3.79     | -1.07       | 1.79       | 1.92         | 1.42       | 9.36         | 2.83       | -1.31        |
| OTTHUMG0 | NULL /// NULL          | ---                  | 0                                    | ---     | -3.29         | -2.32           | 1.03      | 1.51        | -4.47     | -1.67       | -1.11      | 3.09         | 1.33       | -1.79        | 2.90       | 1.84         |
| OTTHUMG0 | NULL /// NULL          | ---                  | 0                                    | ---     | -1.70         | -1.29           | 2.77      | 2.15        | -2.50     | 1.03        | -1.07      | 1.04         | 26.35      | 9.93         | 3.03       | 3.40         |
| OTTHUMG0 | NULL /// NULL          | ---                  | 0                                    | ---     | -1.45         | -1.45           | -2.00     | 1.18        | 1.01      | 3.15        | -1.15      | 1.31         | 6.22       | 4.41         | -4.34      | 1.73         |
| OTTHUMG0 | NULL /// NULL          | ---                  | 0                                    | ---     | 1.24          | 2.34            | 1.32      | 1.48        | 1.10      | -1.73       | 2.00       | 2.52         | 1.20       | 1.18         | -2.01      | -1.15        |
| OTTHUMG0 | NULL /// NULL          | ---                  | 0                                    | ---     | 2.76          | -1.41           | 1.02      | -1.64       | -1.03     | -1.15       | 3.89       | 2.15         | 1.18       | 1.34         | 1.44       | -1.13        |
| OTTHUMG0 | NULL /// NULL          | ---                  | 0                                    | ---     | 1.63          | 1.60            | 1.09      | -1.55       | 1.85      | 3.66        | -2.44      | 2.69         | -6.70      | -1.07        | 1.57       | 1.06         |
| OTTHUMG0 | NULL /// NULL          | ---                  | 0                                    | ---     | -2.05         | -1.94           | -1.11     | 1.16        | -5.01     | -1.22       | -3.71      | -1.18        | -1.60      | 1.02         | -1.03      | -3.81        |
| OTTHUMG0 | NULL /// NULL          | ---                  | 0                                    | ---     | 2.21          | 5.03            | 1.37      | 1.16        | 1.04      | -1.13       | -1.27      | -1.11        | 2.92       | 1.67         | -4.84      | -3.45        |
| OTTHUMG0 | NULL /// NULL          | ---                  | 0                                    | ---     | -1.03         | -2.08           | 1.41      | 2.79        | -5.16     | 1.37        | -4.97      | 1.61         | 1.28       | -1.58        | 1.62       | 2.48         |
| OTTHUMG0 | NULL /// NULL          | ---                  | 0                                    | ---     | 1.06          | 1.13            | 1.15      | 1.22        | 1.08      | -1.01       | 1.01       | -1.12        | -1.58      | -1.55        | -1.83      | -1.82        |
| OTTHUMG0 | NULL /// NULL          | ---                  | 0                                    | ---     | 1.04          | 1.23            | 1.11      | 1.20        | 1.14      | 1.05        | -1.12      | -1.07        | -5.57      | -6.39        | -1.63      | -1.70        |
| OTTHUMG0 | NULL /// NULL /// NULL | ---                  | 0                                    | ---     | -1.31         | -1.21           | -1.01     | -1.17       | -1.16     | -1.01       | -1.02      | 1.09         | 1.31       | 1.32         | 1.20       | 1.40         |
| OTTHUMG0 | NULL /// NULL          | ---                  | 0                                    | ---     | -1.05         | -1.10           | 1.00      | -1.06       | -1.14     | 1.12        | 1.29       | 1.05         | 1.04       | 1.22         | 1.44       | 1.53         |
| OTTHUMG0 | NULL /// NULL          | ---                  | 0                                    | ---     | -3.79         | -5.23           | 1.10      | 1.12        | 1.67      | 2.32        | -1.50      | -3.13        | 6.58       | -1.08        | -1.86      | -2.27        |
| OTTHUMG0 | NULL /// NULL          | ---                  | 0                                    | ---     | 2.17          | -1.13           | -1.22     | -1.11       | 2.17      | 2.69        | -1.65      | 2.53         | 1.12       | 1.25         | 1.79       | -2.20        |
| OTTHUMG0 | NULL /// NULL          | ---                  | 0                                    | ---     | 2.45          | 1.71            | 2.18      | -1.40       | 16.11     | 3.86        | -1.97      | -1.23        | -1.12      | -1.48        | 1.57       | 1.47         |
| OTTHUMG0 | NULL /// NULL          | ---                  | 0                                    | ---     | -1.01         | -1.06           | 1.21      | 1.18        | 1.07      | 1.32        | -1.20      | 1.10         | -1.77      | -1.53        | -1.93      | -1.90        |
| OTTHUMG0 | NULL /// NULL          | ---                  | 0                                    | ---     | -1.27         | -1.22           | 1.03      | 1.36        | 1.01      | 1.10        | -1.19      | -1.06        | -2.05      | -1.39        | -3.80      | -1.89        |
| OTTHUMG0 | NULL /// NULL          | ---                  | 0                                    | ---     | 3.31          | 5.55            | -2.52     | -5.02       | 1.51      | 2.68        | 1.22       | 1.00         | 4.10       | 1.09         | 1.49       | -1.46        |
| OTTHUMG0 | NULL /// NULL          | ---                  | 0                                    | ---     | -1.23         | 1.11            | 1.19      | 1.27        | 1.09      | 1.30        | 1.15       | 1.84         | 1.16       | 1.20         | 1.42       | 2.05         |
| OTTHUMG0 | NULL /// NULL          | ---                  | 0                                    | ---     | 1.11          | 1.10            | 1.04      | -1.01       | 1.07      | -1.05       | 1.02       | -1.06        | 1.66       | 1.22         | 1.67       | 1.30         |
| OTTHUMG0 | NULL /// NULL /// NULL | ---                  | 0                                    | ---     | -1.06         | -1.05           | 1.30      | 1.78        | 7.85      | 4.42        | -1.13      | 1.21         | 1.10       | -1.05        | 1.61       | -1.40        |
| OTTHUMG0 | NULL /// NULL          | ---                  | 0                                    | ---     | 1.58          | -5.33           | -4.44     | -5.18       | 1.51      | -1.44       | -1.19      | -1.35        | 1.67       | -1.77        | 1.65       | 3.69         |
| OTTHUMG0 | NULL /// NULL          | ---                  | 0                                    | ---     | -1.41         | 1.10            | -1.35     | 1.11        | 1.38      | 1.24        | -1.75      | -1.32        | 1.86       | 1.93         | 1.50       | 1.79         |
| OTTHUMG0 | NULL /// NULL          | ---                  | 0                                    | ---     | -5.25         | -4.00           | -3.12     | 1.06        | 4.23      | 1.74        | 1.48       | 2.44         | -4.32      | 1.05         | 9.25       | -1.00        |
| OTTHUMG0 | NULL /// NULL          | ---                  | 0                                    | ---     | -1.50         | 1.30            | -5.63     | -2.96       | 1.34      | -1.87       | -2.57      | 1.28         | -2.46      | 1.07         | 1.70       | 2.24         |
| OTTHUMG0 | NULL /// NULL          | ---                  | 0                                    | ---     | -1.02         | -1.15           | 1.28      | 1.51        | 1.06      | -1.21       | 1.05       | 1.19         | 1.54       | 1.52         | 1.40       | 1.71         |
| OTTHUMG0 | NULL /// NULL          | ---                  | 0                                    | ---     | 1.52          | 1.03            | -1.41     | -5.66       | -1.11     | -1.22       | -1.66      | 2.28         | 1.71       | 2.57         | -1.94      | 1.20         |
| OTTHUMG0 | NULL /// NULL          | ---                  | 0                                    | ---     | 1.67          | 2.15            | 1.73      | -1.19       | 1.24      | 1.98        | 1.03       | -1.14        | 1.33       | 1.42         | -3.58      | -1.34        |
| OTTHUMG0 | NULL /// NULL          | ---                  | 0                                    | ---     | -1.34         | -1.45           | 1.10      | 1.22        | 1.10      | -1.01       | 1.23       | 1.18         | 1.12       | 1.07         | 1.31       | 1.45         |
| OTTHUMG0 | NULL /// NULL          | ---                  | 0                                    | ---     | 1.36          | -1.01           | 1.04      | -1.22       | 1.02      | -1.01       | 1.02       | -1.54        | -1.43      | -1.43        | -1.56      | -1.79        |
| OTTHUMG0 | NULL /// NULL          | ---                  | 0                                    | ---     | -1.16         | -1.03           | 1.10      | -1.35       | -1.12     | 1.00        | -1.24      | -1.13        | 1.35       | 1.03         | 1.40       | 1.27         |
| OTTHUMG0 | NULL /// NULL          | ---                  | 0                                    | ---     | 3.38          | 1.39            | 3.50      | 3.05        | 1.19      | 4.70        | -1.62      | -3.41        | 1.75       | 1.73         | 3.85       | 5.04         |
| OTTHUMG0 | NULL /// NULL          | ---                  | 0                                    | ---     | 1.03          | 1.49            | 1.23      | 1.37        | 1.03      | -1.03       | -1.10      | 1.20         | -2.11      | -2.56        | -2.08      | -2.45        |
| OTTHUMG0 | NULL /// NULL          | ---                  | 0                                    | ---     | -2.02         | -1.06           | -8.22     | -1.35       | -1.64     | 1.48        | -1.60      | -3.09        | -4.44      | -1.15        | 5.92       | 11.09        |
| OTTHUMG0 | NULL /// NULL          | ---                  | 0                                    | ---     | 4.21          | 7.40            | 1.57      | 1.34        | 1.80      | -1.23       | 1.63       | 3.35         | -2.60      | -1.43        | 3.40       | 2.82         |
| OTTHUMG0 | NULL /// NULL          | ---                  | 0                                    | ---     | 1.49          | -1.16           | 1.36      | 2.18        | 1.31      | -1.51       | 1.47       | 1.41         | -1.04      | 1.14         | 1.94       | 1.80         |
| OTTHUMG0 | NULL /// NULL          | ---                  | 0                                    | ---     | 6.64          | 9.51            | -2.24     | -1.48       | 1.67      | 1.71        | 9.93       | 8.29         | 3.28       | 1.41         | 7.14       | 2.28         |

| ID       | Gene Title    | Chromosomal Location | 1st Gene Ontology Biological Process | Pathway | A2497 30 mins | A2497P' 30 mins | A2497 2 h | A2497P' 2 h | A2497 4 h | A2497P' 4 h | A2497 24 h | A2497P' 24 h | A2497 48 h | A2497P' 48 h | A2497 72 h | A2497P' 72 h |
|----------|---------------|----------------------|--------------------------------------|---------|---------------|-----------------|-----------|-------------|-----------|-------------|------------|--------------|------------|--------------|------------|--------------|
| OTTHUMG0 | NULL /// NULL | ---                  | 0                                    | ---     | -2.25         | -1.81           | 1.48      | 1.21        | -1.93     | -1.11       | 6.87       | 4.17         | 2.60       | 1.98         | 7.53       | 11.07        |
| OTTHUMG0 | NULL /// NULL | ---                  | 0                                    | ---     | -1.21         | -1.08           | -1.83     | -1.13       | -1.00     | -1.03       | 1.04       | 1.11         | 6.75       | 6.08         | 2.10       | 1.93         |
| OTTHUMG0 | NULL /// NULL | ---                  | 0                                    | ---     | 9.58          | 8.16            | 1.98      | 2.90        | -2.17     | -2.54       | 2.01       | 2.14         | 1.78       | 2.61         | 1.39       | -2.64        |
| OTTHUMG0 | NULL /// NULL | ---                  | 0                                    | ---     | -1.05         | -1.12           | 1.02      | 1.07        | 1.08      | 1.13        | -1.11      | -1.05        | -1.25      | -1.07        | 1.04       | 1.10         |
| OTTHUMG0 | NULL /// NULL | ---                  | 0                                    | ---     | 1.19          | 1.06            | 1.00      | -1.03       | -3.71     | -1.13       | -2.11      | -2.21        | 4.34       | 4.72         | -2.73      | -3.94        |
| OTTHUMG0 | NULL /// NULL | ---                  | 0                                    | ---     | -1.20         | -1.12           | 1.04      | -1.01       | 1.13      | 1.08        | -1.03      | 1.05         | -1.92      | -1.86        | -1.52      | -1.67        |
| OTTHUMG0 | NULL /// NULL | ---                  | 0                                    | ---     | 1.09          | -1.06           | 1.05      | 1.02        | -1.14     | -1.18       | 1.05       | 1.19         | -2.04      | -1.95        | -3.13      | -3.22        |
| OTTHUMG0 | NULL /// NULL | ---                  | 0                                    | ---     | -1.41         | -1.29           | 3.10      | -1.07       | -1.20     | -2.99       | -2.44      | -1.73        | 1.36       | 1.92         | -1.52      | -1.69        |
| OTTHUMG0 | NULL /// NULL | ---                  | 0                                    | ---     | 1.17          | -1.02           | 1.15      | -1.01       | 1.11      | 1.23        | -1.35      | -1.15        | -1.99      | -1.60        | -3.17      | -2.48        |
| OTTHUMG0 | NULL /// NULL | ---                  | 0                                    | ---     | 1.93          | 1.77            | 1.06      | 1.52        | -1.60     | 1.12        | -1.58      | -2.02        | -1.22      | -1.23        | -1.56      | -1.44        |
| OTTHUMG0 | NULL /// NULL | ---                  | 0                                    | ---     | 1.52          | 1.38            | -1.31     | -1.03       | 1.02      | -1.01       | -1.39      | 1.07         | -1.24      | -1.49        | -2.00      | -2.15        |
| OTTHUMG0 | NULL /// NULL | ---                  | 0                                    | ---     | -1.23         | -1.96           | 7.75      | 7.78        | -3.17     | 1.62        | -2.23      | 1.24         | -1.04      | -1.08        | 1.31       | 1.36         |
| OTTHUMG0 | NULL /// NULL | ---                  | 0                                    | ---     | 1.92          | 1.93            | 1.47      | -1.28       | -1.24     | 1.14        | 1.16       | 1.06         | 1.82       | 1.27         | -4.26      | -2.25        |
| OTTHUMG0 | NULL /// NULL | ---                  | 0                                    | ---     | 1.85          | 2.16            | 1.45      | 1.32        | -1.02     | 1.14        | -1.18      | -1.43        | 2.48       | 1.32         | 1.16       | -2.24        |
| OTTHUMG0 | NULL /// NULL | ---                  | 0                                    | ---     | -1.31         | -4.13           | 1.31      | 1.01        | 4.12      | 1.87        | -5.01      | 1.01         | -1.80      | -5.05        | 1.65       | 2.19         |
| OTTHUMG0 | NULL /// NULL | ---                  | 0                                    | ---     | -2.89         | 1.97            | -1.09     | -2.69       | 1.50      | 2.75        | -2.47      | -1.19        | 10.08      | 7.15         | 1.45       | 1.74         |
| OTTHUMG0 | NULL /// NULL | ---                  | 0                                    | ---     | -1.05         | -1.06           | 1.18      | 1.12        | 1.22      | 1.15        | -1.18      | -1.00        | 1.10       | -1.13        | -2.28      | -1.92        |
| OTTHUMG0 | NULL /// NULL | ---                  | 0                                    | ---     | 1.15          | -1.07           | 1.06      | 1.02        | -1.11     | -1.10       | -1.22      | -1.21        | -1.65      | -1.25        | -1.51      | -1.71        |
| OTTHUMG0 | NULL /// NULL | ---                  | 0                                    | ---     | 1.15          | -1.04           | -1.34     | -1.65       | -2.47     | 1.14        | 1.47       | -1.42        | 3.92       | 3.02         | -1.77      | 1.06         |
| OTTHUMG0 | NULL /// NULL | ---                  | 0                                    | ---     | -1.12         | -1.08           | 1.13      | 1.09        | 1.10      | 1.21        | -1.26      | 1.01         | -1.33      | -1.18        | -1.46      | -1.34        |
| OTTHUMG0 | NULL /// NULL | ---                  | 0                                    | ---     | -1.12         | -1.07           | 1.09      | -1.07       | -1.12     | 1.03        | -1.34      | -1.10        | -1.84      | -1.49        | -1.40      | -1.57        |
| OTTHUMG0 | NULL /// NULL | ---                  | 0                                    | ---     | 1.12          | -1.23           | 1.24      | 1.07        | -1.25     | 1.18        | -1.32      | 1.12         | -3.59      | -2.54        | -1.63      | -1.66        |
| OTTHUMG0 | NULL /// NULL | ---                  | 0                                    | ---     | 1.21          | 1.05            | 1.06      | -1.01       | 1.93      | 1.56        | 5.11       | 4.11         | 2.12       | -1.17        | 2.82       | 2.33         |
| OTTHUMG0 | NULL /// NULL | ---                  | 0                                    | ---     | -5.96         | -1.53           | 1.24      | 1.76        | -2.36     | 1.23        | 8.38       | 7.11         | -1.18      | -1.07        | 5.55       | 6.24         |
| OTTHUMG0 | NULL /// NULL | ---                  | 0                                    | ---     | 1.18          | -1.13           | 1.14      | -1.07       | -1.33     | 1.20        | -1.05      | -1.13        | -2.53      | -2.37        | -1.25      | -1.49        |
| OTTHUMG0 | NULL /// NULL | ---                  | 0                                    | ---     | 1.08          | 1.28            | -1.17     | -1.02       | 1.02      | 1.05        | 1.36       | 1.16         | -1.67      | -1.25        | -1.75      | -1.84        |
| OTTHUMG0 | NULL /// NULL | ---                  | 0                                    | ---     | 2.08          | 1.89            | 1.19      | 1.15        | -1.08     | 1.38        | 1.01       | 1.51         | 2.01       | 2.39         | 1.81       | 2.56         |
| OTTHUMG0 | NULL /// NULL | ---                  | 0                                    | ---     | 1.27          | 1.20            | 1.21      | 1.12        | -1.08     | -1.62       | -1.39      | 1.68         | 2.09       | 2.38         | 1.56       | 2.82         |
| OTTHUMG0 | NULL /// NULL | ---                  | 0                                    | ---     | 1.32          | 1.21            | 1.14      | -1.38       | 1.46      | 1.15        | -1.06      | 1.33         | -2.95      | -2.14        | -2.55      | -3.19        |
| OTTHUMG0 | NULL /// NULL | ---                  | 0                                    | ---     | 6.70          | 1.55            | 1.73      | 6.94        | 5.47      | 8.03        | -1.84      | -1.26        | 2.26       | 2.46         | -2.39      | -2.05        |
| OTTHUMG0 | NULL /// NULL | ---                  | 0                                    | ---     | -1.65         | -1.04           | -8.64     | -1.36       | 1.93      | -1.92       | 1.79       | 2.01         | 2.03       | -1.29        | 2.11       | 2.10         |
| OTTHUMG0 | NULL /// NULL | ---                  | 0                                    | ---     | -1.43         | -1.44           | -1.15     | 1.01        | -1.09     | -1.42       | -1.42      | 1.25         | 1.08       | 1.29         | -4.49      | -3.24        |
| OTTHUMG0 | NULL /// NULL | ---                  | 0                                    | ---     | 3.06          | 2.05            | -1.40     | -1.01       | -1.31     | 1.07        | -1.64      | -1.06        | 1.21       | 1.04         | 2.20       | 3.08         |
| OTTHUMG0 | NULL /// NULL | ---                  | 0                                    | ---     | -1.84         | -2.37           | -3.58     | -9.69       | -1.67     | -1.30       | 4.03       | 5.24         | 1.07       | 1.38         | 4.23       | 5.55         |
| OTTHUMG0 | NULL /// NULL | ---                  | 0                                    | ---     | 1.48          | -1.06           | 1.02      | 1.30        | 1.21      | 1.27        | -1.10      | 1.11         | -2.02      | -1.19        | -3.20      | -1.66        |
| OTTHUMG0 | NULL /// NULL | ---                  | 0                                    | ---     | -1.84         | 1.32            | -2.26     | -1.49       | 1.16      | 1.03        | 1.03       | 1.50         | -5.66      | -3.81        | -2.02      | -1.23        |
| OTTHUMG0 | NULL /// NULL | ---                  | 0                                    | ---     | -2.14         | -2.80           | -2.11     | 1.02        | -6.35     | 1.66        | -1.31      | -1.47        | -1.15      | -8.34        | 1.08       | -1.45        |
| OTTHUMG0 | NULL /// NULL | ---                  | 0                                    | ---     | 7.78          | 3.74            | -1.43     | 1.08        | 2.03      | -1.33       | -1.82      | -14.56       | 2.41       | -1.30        | 1.82       | 1.81         |
| OTTHUMG0 | NULL /// NULL | ---                  | 0                                    | ---     | 1.65          | 1.79            | -2.08     | -1.84       | 1.40      | 1.53        | -2.36      | 1.53         | 3.26       | 2.05         | 1.00       | 1.20         |
| OTTHUMG0 | NULL /// NULL | ---                  | 0                                    | ---     | 1.18          | 1.07            | 1.33      | 1.32        | 1.24      | 1.22        | -1.59      | -1.81        | -1.49      | -1.24        | -2.96      | -2.69        |
| OTTHUMG0 | NULL /// NULL | ---                  | 0                                    | ---     | 1.11          | 1.28            | -1.10     | -2.18       | 2.75      | -1.71       | 2.77       | 3.83         | -1.64      | -2.88        | -2.29      | 1.21         |
| OTTHUMG0 | NULL /// NULL | ---                  | 0                                    | ---     | -1.14         | -1.03           | -1.25     | -1.34       | 1.47      | 1.35        | -1.33      | -1.25        | -1.84      | -2.31        | -1.35      | -1.01        |
| OTTHUMG0 | NULL /// NULL | ---                  | 0                                    | ---     | 1.30          | -3.27           | -1.07     | -1.36       | 1.45      | -1.22       | -1.89      | -1.51        | -1.26      | -3.18        | -2.92      | -1.42        |
| OTTHUMG0 | NULL /// NULL | ---                  | 0                                    | ---     | -2.35         | -1.22           | -1.16     | -1.16       | 1.23      | -1.68       | 1.28       | 1.12         | 1.34       | 1.26         | 4.34       | 5.40         |
| OTTHUMG0 | NULL /// NULL | ---                  | 0                                    | ---     | -1.58         | -1.46           | -1.48     | -2.27       | 2.87      | 1.02        | 2.06       | 5.47         | 1.86       | 2.58         | -1.48      | 2.05         |
| OTTHUMG0 | NULL /// NULL | ---                  | 0                                    | ---     | 2.02          | 2.19            | -1.19     | -1.83       | 1.15      | 1.65        | 1.17       | -1.37        | -1.78      | -2.06        | -2.17      | -3.40        |
| OTTHUMG0 | NULL /// NULL | ---                  | 0                                    | ---     | -1.17         | -1.14           | -1.02     | -4.03       | -1.47     | 1.22        | 1.19       | 1.31         | 1.14       | -1.20        | 1.99       | 1.98         |
| OTTHUMG0 | NULL /// NULL | ---                  | 0                                    | ---     | 1.60          | 4.93            | 4.85      | 2.52        | -4.98     | 1.49        | 1.10       | 1.38         | -4.84      | 1.34         | 9.81       | 2.70         |
| OTTHUMG0 | NULL /// NULL | ---                  | 0                                    | ---     | -1.00         | -1.38           | 1.31      | 2.33        | -1.51     | -1.03       | -11.01     | -1.79        | -3.02      | -2.92        | 1.99       | 8.66         |
| OTTHUMG0 | NULL /// NULL | ---                  | 0                                    | ---     | -1.50         | 1.16            | 1.27      | -1.79       | 2.37      | 6.71        | 5.43       | 3.95         | -1.01      | 1.26         | -2.55      | -1.55        |
| OTTHUMG0 | NULL /// NULL | ---                  | 0                                    | ---     | -1.17         | -1.04           | -1.01     | -1.32       | -1.04     | 1.04        | -1.20      | -1.04        | -2.24      | -1.98        | -1.88      | -2.08        |
| OTTHUMG0 | NULL /// NULL | ---                  | 0                                    | ---     | 1.38          | 1.45            | -1.05     | -1.14       | -1.02     | 1.03        | -1.46      | -1.09        | -2.48      | -1.56        | 1.03       | -1.01        |
| OTTHUMG0 | NULL /// NULL | ---                  | 0                                    | ---     | 1.08          | -1.12           | 1.26      | 1.08        | 1.02      | 1.04        | 1.07       | -1.04        | -1.04      | -1.12        | 1.34       | -1.02        |
| OTTHUMG0 | NULL /// NULL | ---                  | 0                                    | ---     | -1.34         | 1.55            | -1.53     | 1.11        | -1.42     | -1.80       | 2.37       | 1.68         | 1.67       | 1.08         | 1.92       | 2.64         |
| OTTHUMG0 | NULL /// NULL | ---                  | 0                                    | ---     | 4.14          | 1.11            | 1.31      | -1.11       | 2.64      | 1.02        | -5.22      | -5.30        | 1.39       | 1.10         | -8.64      | -8.51        |
| OTTHUMG0 | NULL /// NULL | ---                  | 0                                    | ---     | -1.19         | -1.47           | 1.41      | 1.60        | 1.19      | 1.17        | 1.28       | -1.05        | 1.58       | 1.46         | 1.33       | 1.50         |
| OTTHUMG0 | NULL /// NULL | ---                  | 0                                    | ---     | -1.68         | 1.05            | 1.43      | -1.04       | 1.36      | -1.06       | 1.93       | 4.74         | -1.19      | -1.26        | -1.91      | -1.99        |
| OTTHUMG0 | NULL /// NULL | ---                  | 0                                    | ---     | 1.01          | -1.32           | -1.83     | -1.42       | -1.15     | -1.32       | -1.35      | -1.37        | -3.43      | -4.09        | -7.31      | -3.71        |
| OTTHUMG0 | NULL /// NULL | ---                  | 0                                    | ---     | -1.17         | -1.22           | 1.24      | -1.13       | 1.43      | -1.08       | -1.64      | -1.46        | 2.18       | 1.74         | 2.84       | 2.49         |
| OTTHUMG0 | NULL /// NULL | ---                  | 0                                    | ---     | 1.20          | 1.12            | 1.06      | 1.06        | 1.49      | 1.25        | -1.09      | 1.03         | -1.35      | -1.27        | -1.57      | -1.28        |
| OTTHUMG0 | NULL /// NULL | ---                  | 0                                    | ---     | 1.29          | 1.16            | -1.02     | -1.03       | -1.13     | 1.08        | -1.45      | -1.06        | -1.52      | -1.47        | -1.67      | -1.78        |
| OTTHUMG0 | NULL /// NULL | ---                  | 0                                    | ---     | 1.70          | 1.44            | 1.14      | 1.15        | 1.28      | 1.08        | -1.24      | 1.18         | -5.85      | -7.94        | -2.25      | -4.52        |
| OTTHUMG0 | NULL /// NULL | ---                  | 0                                    | ---     | 1.10          | 1.10            | -1.10     | -1.44       | 1.08      | 1.05        | -1.22      | -1.20        | -1.39      | -1.46        | -1.16      | -1.53        |
| OTTHUMG0 | NULL /// NULL | ---                  | 0                                    | ---     | -1.09         | -1.18           | 1.14      | 1.03        | -1.23     | 1.01        | -1.50      | -1.09        | -2.34      | -2.24        | -2.06      | -1.65        |
| OTTHUMG0 | NULL /// NULL | ---                  | 0                                    | ---     | -1.65         | -1.48           | 1.37      | 1.41        | 1.44      | 1.25        | -1.08      | -1.28        | -2.32      | -2.65        | -1.31      | -1.65        |
| OTTHUMG0 | NULL /// NULL | ---                  | 0                                    | ---     | -1.06         | -1.07           | -1.06     | 1.25        | 1.24      | -1.36       | 1.01       | -1.08        | -1.43      | -1.25        | -1.52      | 1.56         |

| ID       | Gene Title             | Chromosomal Location | 1st Gene Ontology Biological Process | Pathway                              | A2497 30 mins | A2497P' 30 mins | A2497 2 h | A2497P' 2 h | A2497 4 h | A2497P' 4 h | A2497 24 h | A2497P' 24 h | A2497 48 h | A2497P' 48 h | A2497 72 h | A2497P' 72 h |
|----------|------------------------|----------------------|--------------------------------------|--------------------------------------|---------------|-----------------|-----------|-------------|-----------|-------------|------------|--------------|------------|--------------|------------|--------------|
| OTTHUMG0 | NULL /// NULL          | ---                  | 0                                    | ---                                  | -1.05         | -1.05           | 1.19      | -1.06       | 1.01      | -1.06       | 1.20       | 1.11         | -1.23      | -1.31        | -1.31      | -1.12        |
| OTTHUMG0 | NULL /// NULL          | ---                  | 0                                    | ---                                  | 1.11          | 1.15            | 1.04      | 1.09        | -1.08     | -1.02       | -1.24      | -1.06        | -1.92      | -1.59        | -1.41      | -1.57        |
| OTTHUMG0 | NULL /// NULL          | ---                  | 0                                    | ---                                  | 1.46          | 1.05            | 1.64      | 2.07        | 1.57      | 3.01        | -1.86      | -1.17        | 2.37       | 1.40         | 2.34       | 1.82         |
| OTTHUMG0 | NULL /// NULL          | ---                  | 0                                    | ---                                  | 1.15          | 1.58            | 1.02      | -1.17       | -1.16     | -1.20       | -1.16      | -1.29        | 1.37       | 2.02         | 1.43       | 1.77         |
| OTTHUMG0 | NULL /// NULL          | ---                  | 0                                    | ---                                  | -1.03         | -1.19           | -1.08     | -1.34       | -1.14     | 1.05        | -1.00      | 1.02         | 1.57       | 1.39         | 1.77       | 1.59         |
| OTTHUMG0 | NULL /// NULL          | ---                  | 0                                    | ---                                  | -1.04         | -1.15           | 1.12      | -1.05       | -1.10     | -1.14       | 1.29       | 1.08         | -2.08      | -1.60        | -2.10      | -1.87        |
| OTTHUMG0 | NULL /// NULL /// NULL | ---                  | 0                                    | ---                                  | -1.06         | -1.24           | 1.18      | 1.16        | 1.07      | -1.23       | -1.01      | -1.07        | -1.89      | -1.23        | -1.89      | -2.01        |
| OTTHUMG0 | NULL /// NULL          | ---                  | 0                                    | ---                                  | 1.28          | 1.69            | 1.72      | 1.26        | -1.25     | -1.23       | -1.11      | -1.28        | -1.98      | -4.22        | -1.15      | -2.14        |
| OTTHUMG0 | NULL /// NULL          | ---                  | 0                                    | ---                                  | -1.31         | -1.19           | 1.02      | 1.17        | 1.28      | 1.41        | 1.22       | 1.31         | -3.90      | -3.88        | -3.70      | -1.80        |
| OTTHUMG0 | NULL /// NULL          | ---                  | 0                                    | ---                                  | 1.11          | 1.01            | 1.07      | 1.18        | -1.06     | 1.10        | -1.08      | 1.08         | 1.41       | 1.30         | 1.09       | 1.20         |
| OTTHUMG0 | NULL /// NULL          | ---                  | 0                                    | ---                                  | -1.27         | -1.05           | -1.10     | 1.41        | 2.87      | 3.63        | 1.60       | 1.02         | 2.94       | -1.42        | -4.21      | -2.69        |
| OTTHUMG0 | NULL /// NULL          | ---                  | 0                                    | ---                                  | 1.83          | 1.38            | 1.12      | -2.07       | 1.59      | 1.36        | -2.35      | -1.92        | 4.07       | 2.58         | -1.48      | -2.69        |
| OTTHUMG0 | NULL /// NULL          | ---                  | 0                                    | ---                                  | 1.63          | 1.38            | -1.06     | -1.08       | -1.30     | -1.35       | -1.05      | 1.05         | 1.08       | -1.10        | 1.42       | 1.21         |
| OTTHUMG0 | NULL /// NULL          | ---                  | 0                                    | ---                                  | -1.81         | -2.30           | -1.17     | 1.60        | -1.79     | 1.02        | -1.58      | -1.83        | 4.11       | 2.53         | 2.08       | 2.07         |
| OTTHUMG0 | NULL /// NULL          | ---                  | 0                                    | ---                                  | -1.10         | -1.09           | 1.13      | 1.08        | 1.30      | 1.33        | -1.45      | -1.21        | -2.38      | -2.38        | -2.94      | -2.75        |
| OTTHUMG0 | NULL /// NULL          | ---                  | 0                                    | ---                                  | 2.31          | 3.00            | -1.45     | -2.63       | -1.88     | -3.40       | 1.26       | 4.61         | 3.35       | 1.28         | -1.05      | 1.12         |
| OTTHUMG0 | NULL /// NULL          | ---                  | 0                                    | ---                                  | -1.01         | 1.10            | 1.11      | 1.16        | 1.09      | -1.12       | -1.19      | -1.12        | -2.00      | -1.79        | -2.94      | -2.16        |
| OTTHUMG0 | NULL /// NULL          | ---                  | 0                                    | ---                                  | 2.91          | 2.89            | 1.30      | -1.11       | 1.52      | 1.69        | 2.58       | 1.46         | 1.57       | 1.77         | 1.45       | 1.39         |
| OTTHUMG0 | NULL /// NULL          | ---                  | 0                                    | ---                                  | 1.20          | -1.08           | 1.12      | 1.05        | -1.13     | 1.13        | -1.39      | -1.10        | -1.90      | -1.49        | -1.23      | -1.10        |
| OTTHUMG0 | NULL /// NULL          | ---                  | 0                                    | ---                                  | 1.41          | 1.69            | -1.15     | -1.24       | 1.28      | -1.13       | -1.86      | 1.29         | -1.42      | -1.50        | -1.52      | -1.23        |
| OTTHUMG0 | NULL /// NULL          | ---                  | 0                                    | ---                                  | -1.72         | -1.33           | 1.56      | 1.77        | 1.43      | 1.26        | -1.30      | 1.05         | -2.32      | -2.05        | -2.47      | -1.90        |
| OTTHUMG0 | NULL /// NULL          | ---                  | 0                                    | ---                                  | -1.08         | -1.36           | -1.12     | 1.06        | 1.06      | -1.18       | 1.07       | -1.06        | -1.58      | -1.59        | -2.10      | -2.13        |
| OTTHUMG0 | NULL /// NULL          | ---                  | 0                                    | ---                                  | 1.36          | 1.28            | 1.12      | -1.19       | 1.47      | 1.51        | 1.55       | -1.14        | -2.65      | -1.87        | -2.10      | -2.74        |
| OTTHUMG0 | NULL /// NULL          | ---                  | 0                                    | ---                                  | 2.68          | 1.58            | 1.06      | 1.10        | -5.59     | 1.28        | -1.19      | -12.53       | 1.55       | -1.00        | -1.90      | -1.17        |
| OTTHUMG0 | NULL /// NULL          | ---                  | 0                                    | ---                                  | 1.40          | 1.21            | 1.08      | 1.05        | 1.69      | 1.20        | -1.05      | -1.26        | -1.39      | -1.21        | -2.41      | -1.74        |
| OTTHUMG0 | NULL /// NULL          | ---                  | 0                                    | ---                                  | 1.18          | 2.11            | -3.13     | -3.88       | -1.61     | 2.12        | -1.03      | 1.34         | -1.46      | -1.55        | 1.95       | 4.93         |
| OTTHUMG0 | NULL /// NULL          | ---                  | 0                                    | ---                                  | -1.18         | -1.45           | -1.80     | -1.16       | 1.76      | 1.98        | 1.77       | 1.12         | 1.35       | 1.69         | -1.60      | -3.25        |
| OTTHUMG0 | NULL /// NULL          | ---                  | 0                                    | ---                                  | 2.67          | 2.20            | 2.02      | 2.13        | -1.13     | 1.16        | 1.10       | -1.51        | 2.81       | 1.20         | -2.19      | -1.28        |
| OTTHUMG0 | NULL /// NULL          | ---                  | 0                                    | ---                                  | 2.52          | 2.15            | 1.85      | -1.41       | -1.41     | -1.78       | 1.02       | 2.32         | 2.06       | 1.37         | -1.37      | -1.23        |
| OTTHUMG0 | NULL /// NULL          | ---                  | 0                                    | ---                                  | -1.18         | -2.80           | 1.44      | -1.96       | -3.42     | 3.06        | -2.01      | -3.03        | -1.77      | -5.95        | 1.18       | 1.24         |
| OTTHUMG0 | NULL /// NULL          | ---                  | 0                                    | ---                                  | 1.03          | 1.07            | 1.04      | 1.01        | 1.05      | 1.02        | 1.04       | -1.05        | 1.78       | 1.75         | 1.59       | 1.72         |
| OTTHUMG0 | NULL /// NULL          | ---                  | 0                                    | ---                                  | 2.61          | -1.06           | -1.35     | 1.13        | -1.85     | -3.46       | -1.51      | -1.07        | 2.57       | 1.96         | -3.51      | -1.74        |
| OTTHUMG0 | NULL /// NULL          | ---                  | 0                                    | ---                                  | -1.02         | -1.17           | -1.53     | 1.00        | 1.24      | 1.40        | -1.14      | -1.15        | -2.33      | -3.52        | -2.95      | -1.96        |
| OTTHUMG0 | NULL /// NULL          | ---                  | 0                                    | ---                                  | -1.59         | -1.58           | -2.48     | 1.18        | 1.22      | 1.07        | 2.27       | 7.19         | -2.57      | -1.75        | -10.76     | -7.87        |
| OTTHUMG0 | NULL /// NULL          | ---                  | 0                                    | ---                                  | -1.86         | -1.41           | 1.69      | 1.87        | -1.95     | -1.47       | -1.31      | 1.17         | 5.03       | 3.39         | -1.01      | 2.29         |
| OTTHUMG0 | NULL /// NULL          | ---                  | 0                                    | ---                                  | 1.04          | 1.07            | -1.50     | -1.35       | 1.03      | 1.00        | -1.28      | -1.47        | -2.43      | -1.68        | -1.80      | -1.39        |
| OTTHUMG0 | NULL /// NULL /// NULL | ---                  | 0                                    | ---                                  | 1.18          | -1.15           | -1.13     | -1.07       | 1.03      | -1.05       | 1.05       | 1.10         | 1.18       | 1.57         | -1.05      | 1.20         |
| OTTHUMG0 | NULL /// NULL          | ---                  | 0                                    | ---                                  | 1.30          | 1.24            | 1.02      | -1.12       | -1.15     | -1.12       | -1.47      | -1.26        | -1.79      | -1.53        | -1.39      | -1.59        |
| OTTHUMG0 | NULL /// NULL          | ---                  | 0                                    | ---                                  | 1.02          | 1.20            | -1.04     | -1.39       | -1.07     | -1.40       | -1.42      | -1.18        | -1.34      | -1.36        | -1.05      | -1.20        |
| OTTHUMG0 | NULL /// NULL          | ---                  | 0                                    | ---                                  | 1.23          | 1.15            | 1.13      | 1.05        | -1.05     | 1.39        | -1.56      | -1.03        | -1.64      | -1.35        | -1.45      | -1.60        |
| OTTHUMG0 | NULL /// NULL          | ---                  | 0                                    | ---                                  | 1.99          | 1.60            | -1.04     | -1.68       | -1.04     | -1.15       | -3.51      | 1.29         | -2.80      | -2.73        | 1.14       | 2.63         |
| OTTHUMG0 | NULL /// NULL          | ---                  | 0                                    | ---                                  | -1.11         | 2.18            | -1.13     | 1.16        | 1.19      | 1.07        | -1.38      | -1.50        | 2.75       | 1.46         | 1.54       | -1.40        |
| OTTHUMG0 | NULL /// NULL          | ---                  | 0                                    | ---                                  | 1.67          | -2.36           | -1.43     | -1.54       | -1.72     | -1.06       | -1.19      | 6.53         | 1.50       | 1.11         | -1.63      | 2.42         |
| OTTHUMG0 | NULL /// NULL          | ---                  | 0                                    | ---                                  | 1.07          | 1.21            | 1.37      | -1.00       | 1.28      | -1.04       | -1.45      | -1.01        | -2.54      | -2.05        | -1.64      | -1.56        |
| OTTHUMG0 | NULL /// NULL          | ---                  | 0                                    | ---                                  | 2.05          | 2.03            | -1.06     | -1.10       | 1.68      | 1.16        | -1.09      | 1.46         | -1.31      | -1.05        | -2.17      | -1.94        |
| OTTHUMG0 | NULL /// NULL          | ---                  | 0                                    | ---                                  | -1.13         | -1.27           | -1.04     | 1.10        | -1.19     | -1.14       | 1.17       | 1.06         | -3.33      | -2.44        | -1.96      | -1.65        |
| OTTHUMG0 | NULL /// NULL          | ---                  | 0                                    | ---                                  | -1.16         | -1.25           | -1.10     | -1.01       | 1.14      | 1.09        | 1.15       | 1.11         | -1.82      | -1.73        | -2.06      | -1.42        |
| OTTHUMG0 | NULL /// NULL          | ---                  | 0                                    | ---                                  | -1.38         | -1.41           | -1.26     | 1.03        | 1.02      | -1.10       | -1.07      | -1.55        | -3.57      | -2.39        | -2.79      | -2.93        |
| OTTHUMG0 | NULL /// NULL          | ---                  | 0                                    | ---                                  | -1.21         | -1.28           | -1.02     | 1.02        | 1.11      | -1.29       | 1.04       | 1.19         | -3.27      | -1.81        | 1.12       | 1.43         |
| OTTHUMG0 | NULL /// NULL          | ---                  | 0                                    | ---                                  | -1.47         | -1.49           | -6.27     | -7.58       | -1.87     | -2.41       | 1.02       | 1.50         | 1.03       | 1.06         | 1.16       | 1.43         |
| OTTHUMG0 | NULL /// NULL          | ---                  | 0                                    | ---                                  | 1.52          | 2.15            | -1.02     | -1.05       | 1.42      | -1.01       | -1.57      | -1.12        | -7.66      | -4.32        | -2.63      | -5.13        |
| OTTHUMG0 | NULL /// NULL          | ---                  | 0                                    | ---                                  | 1.53          | -1.28           | 1.03      | 1.63        | 1.24      | 1.06        | 1.28       | 1.07         | -2.40      | -3.12        | -6.10      | -4.01        |
| OTTHUMG0 | NULL /// NULL          | ---                  | 0                                    | ---                                  | -1.46         | -1.17           | 1.08      | 1.93        | -2.25     | 1.36        | -1.20      | -1.69        | -2.17      | 1.36         | -3.64      | -3.62        |
| OTTHUMG0 | NULL /// NULL          | ---                  | 0                                    | ---                                  | -2.46         | 1.27            | 2.49      | -1.19       | 2.13      | 1.86        | -1.19      | 1.18         | -1.73      | -6.49        | -1.93      | -1.42        |
| OTTHUMG0 | NULL /// NULL          | ---                  | 0                                    | ---                                  | -1.51         | -1.40           | 1.10      | -1.37       | -1.18     | 1.04        | -1.51      | 1.74         | -4.02      | -7.70        | -21.25     | -3.73        |
| OTTHUMG0 | NULL /// NULL          | ---                  | 0                                    | ---                                  | -1.52         | -1.22           | 3.18      | 1.59        | -1.13     | 1.44        | -1.08      | 2.51         | 1.03       | 1.25         | -2.14      | -2.36        |
| OTTHUMG0 | NULL /// NULL          | ---                  | 0                                    | ---                                  | -1.60         | 1.03            | -1.05     | -1.20       | 1.24      | 1.06        | -1.31      | -1.11        | -1.52      | -2.39        | -1.91      | -1.52        |
| OTTHUMG0 | NULL /// NULL          | ---                  | 0                                    | ---                                  | 1.16          | -1.68           | -1.36     | -1.22       | 1.54      | 1.50        | -1.06      | -1.06        | -2.43      | -2.62        | -1.78      | -2.09        |
| OTTHUMG0 | NULL /// NULL          | ---                  | 0                                    | ---                                  | -1.18         | -1.01           | 1.12      | -1.02       | 1.07      | 1.03        | -1.31      | -1.13        | -1.82      | -3.16        | -1.39      | -1.71        |
| OTTHUMG0 | NULL /// NULL          | ---                  | 0                                    | ---                                  | 2.59          | 2.52            | 1.32      | 1.92        | 2.81      | 3.92        | 1.54       | 1.73         | -1.26      | 1.26         | 1.18       | -1.78        |
| OTTHUMG0 | NULL /// NULL          | ---                  | 0                                    | ---                                  | -1.04         | -2.17           | -3.18     | 1.53        | -1.62     | -1.97       | -1.52      | 1.18         | 2.47       | 1.22         | 1.79       | 1.32         |
| OTTHUMG0 | NULL /// NULL          | ---                  | 0                                    | ---                                  | -1.09         | -1.07           | 1.01      | -1.08       | 1.07      | -1.04       | 1.04       | -1.02        | -1.16      | -1.23        | 1.17       | 1.11         |
| OTTHUMG0 | NULL /// NULL          | ---                  | 0                                    | ---                                  | -1.21         | -1.15           | -1.13     | -1.27       | -1.01     | -1.11       | -1.05      | -1.15        | -1.21      | -1.20        | 1.14       | 1.14         |
| OTTHUMG0 | NULL /// NULL          | ---                  | 0                                    | Matrix_Metalloproteinases // GenMAPP | -1.04         | -1.50           | 1.87      | 1.71        | -2.09     | 1.06        | 1.80       | 2.62         | 3.60       | 2.13         | -2.68      | -1.49        |
| OTTHUMG0 | NULL /// NULL          | ---                  | 0                                    | ---                                  | 2.54          | 5.58            | -1.22     | -1.31       | 1.07      | -1.71       | -3.67      | -1.13        | 5.87       | 1.55         | -5.21      | 1.69         |
| OTTHUMG0 | NULL /// NULL          | ---                  | 0                                    | ---                                  | -1.05         | 1.01            | -1.04     | 1.00        | -1.13     | -1.00       | -1.45      | -1.15        | -2.12      | -1.67        | -1.50      | -1.51        |

| ID       | Gene Title                  | Chromosomal Location | 1st Gene Ontology Biological Process    | Pathway | A2497 30 mins | A2497P' 30 mins | A2497 2 h | A2497P' 2 h | A2497 4 h | A2497P' 4 h | A2497 24 h | A2497P' 24 h | A2497 48 h | A2497P' 48 h | A2497 72 h | A2497P' 72 h |
|----------|-----------------------------|----------------------|-----------------------------------------|---------|---------------|-----------------|-----------|-------------|-----------|-------------|------------|--------------|------------|--------------|------------|--------------|
| OTTHUMG0 | NULL /// NULL               | ---                  | 0                                       | ---     | 1.14          | 1.10            | 1.01      | -1.03       | -1.02     | 1.03        | -1.12      | -1.03        | -1.66      | -1.43        | -1.64      | -1.90        |
| OTTHUMG0 | NULL /// NULL               | ---                  | 0                                       | ---     | 1.44          | 1.39            | 1.07      | 1.11        | -1.03     | 1.07        | -1.53      | -1.40        | -2.32      | -2.17        | -2.46      | -2.62        |
| OTTHUMG0 | NULL /// NULL               | ---                  | 0                                       | ---     | -1.11         | -1.08           | 1.22      | 1.27        | 1.16      | -1.09       | 1.15       | 1.04         | 1.31       | 1.10         | 2.10       | 1.74         |
| OTTHUMG0 | NULL /// NULL               | ---                  | 0                                       | ---     | -1.22         | -3.35           | 1.52      | 1.94        | -2.93     | -1.52       | 6.12       | 6.36         | 2.31       | -1.88        | 1.63       | 1.35         |
| OTTHUMG0 | NULL /// NULL               | ---                  | 0                                       | ---     | 1.43          | 1.44            | 1.04      | -1.13       | -1.78     | -1.65       | -1.12      | -1.08        | -1.37      | -1.05        | -1.24      | -1.13        |
| OTTHUMG0 | NULL /// NULL               | ---                  | 0                                       | ---     | 1.12          | 1.09            | -1.01     | 1.10        | 1.00      | 1.02        | 1.10       | -1.07        | -2.51      | -2.22        | 1.23       | -1.14        |
| OTTHUMG0 | NULL /// NULL               | ---                  | 0                                       | ---     | 1.11          | 1.00            | -1.04     | 1.02        | -1.03     | 1.02        | -1.33      | -1.17        | -2.22      | -1.68        | -2.81      | -2.44        |
| OTTHUMG0 | NULL /// NULL               | ---                  | 0                                       | ---     | 1.18          | 1.10            | -1.00     | -1.07       | -1.00     | -1.08       | -1.83      | -1.61        | -2.51      | -2.25        | -4.84      | -4.40        |
| OTTHUMG0 | NULL /// NULL               | ---                  | 0                                       | ---     | -1.02         | -1.13           | -1.10     | -1.06       | -1.26     | 1.04        | 1.01       | -1.05        | -1.39      | -1.25        | -1.47      | -1.64        |
| OTTHUMG0 | NULL /// NULL               | ---                  | 0                                       | ---     | 1.05          | -1.10           | -1.15     | -1.07       | -1.05     | -1.13       | -1.33      | 1.16         | -1.90      | -2.52        | -5.54      | -3.87        |
| OTTHUMG0 | NULL /// NULL               | ---                  | 0                                       | ---     | 4.77          | 1.56            | -1.49     | -2.41       | 1.04      | 1.74        | -1.15      | -1.12        | -1.41      | -1.65        | -1.73      | -2.07        |
| OTTHUMG0 | NULL /// NULL               | ---                  | 0                                       | ---     | 1.39          | 1.36            | 1.14      | 1.18        | 1.29      | 1.35        | -1.18      | -1.27        | 1.03       | -1.07        | 1.47       | 1.53         |
| OTTHUMG0 | NULL /// NULL               | ---                  | 0                                       | ---     | -1.04         | -1.05           | 1.09      | 1.05        | 1.08      | -1.00       | 1.17       | 1.14         | 1.59       | 1.72         | 1.64       | 1.59         |
| OTTHUMG0 | NULL /// NULL               | ---                  | 0                                       | ---     | -1.04         | -1.27           | -1.00     | -1.04       | 1.04      | -1.11       | -1.36      | -1.32        | 1.35       | 1.59         | 1.92       | 1.80         |
| OTTHUMG0 | NULL /// NULL               | ---                  | 0                                       | ---     | -3.20         | 1.13            | -1.08     | -1.04       | -2.06     | 1.65        | 1.20       | -1.18        | -4.00      | -1.79        | -2.42      | -1.19        |
| OTTHUMG0 | NULL /// NULL               | ---                  | 0                                       | ---     | 1.24          | 2.61            | -1.38     | -1.17       | -2.13     | 1.22        | 1.17       | 1.20         | 1.51       | 1.05         | -1.18      | -2.24        |
| OTTHUMG0 | NULL /// NULL               | ---                  | 0                                       | ---     | 2.12          | 1.19            | 2.23      | 7.14        | -3.17     | -4.08       | 4.72       | 3.41         | -1.93      | -1.14        | 1.69       | 2.06         |
| OTTHUMG0 | NULL /// NULL               | ---                  | 0                                       | ---     | 1.23          | -2.09           | -1.64     | 1.05        | -1.04     | -1.13       | 2.59       | 1.79         | 1.79       | 2.34         | -1.48      | -1.41        |
| OTTHUMG0 | NULL /// NULL               | ---                  | 0                                       | ---     | -2.41         | -1.44           | 1.54      | -2.46       | 6.81      | 2.34        | -2.29      | 4.04         | -1.13      | -1.63        | 1.81       | 2.12         |
| OTTHUMG0 | NULL /// NULL               | ---                  | 0                                       | ---     | 1.29          | 3.02            | -7.66     | -2.56       | 1.48      | 1.29        | -1.93      | -2.55        | 2.73       | 2.55         | -2.89      | 1.53         |
| OTTHUMG0 | NULL /// NULL /// NULL      | ---                  | 0                                       | ---     | 1.38          | 1.15            | -1.00     | 1.03        | -1.12     | 1.04        | 1.08       | -1.03        | -1.90      | -1.89        | -1.56      | -1.41        |
| OTTHUMG0 | NULL /// NULL /// NULL      | ---                  | 0                                       | ---     | 1.58          | 1.33            | 1.09      | 1.12        | -1.07     | -1.02       | 1.14       | 1.32         | -1.85      | -1.66        | -1.43      | -1.70        |
| OTTHUMG0 | NULL /// NULL               | ---                  | 0                                       | ---     | 1.04          | -1.02           | 1.01      | -1.03       | -1.02     | 1.07        | -1.25      | -1.06        | -1.03      | 1.20         | -1.38      | -1.13        |
| OTTHUMG0 | NULL /// NULL               | ---                  | 0                                       | ---     | -3.79         | 1.11            | 4.18      | 1.51        | -1.05     | 1.35        | 2.46       | 1.80         | 18.70      | 31.76        | -1.94      | -1.75        |
| OTTHUMG0 | NULL /// NULL               | ---                  | 0                                       | ---     | 3.20          | 2.55            | -7.15     | -1.88       | 6.78      | 4.72        | 6.91       | 1.06         | 4.89       | 4.96         | 4.35       | 6.15         |
| OTTHUMG0 | NULL /// NULL               | ---                  | 0                                       | ---     | -1.00         | 1.09            | -1.02     | -1.12       | 1.07      | 1.01        | -1.18      | -1.14        | -1.19      | -1.15        | -1.15      | -1.21        |
| OTTHUMG0 | NULL /// NULL               | ---                  | 0                                       | ---     | 1.01          | -1.11           | 1.33      | 1.06        | 1.28      | 1.21        | 1.21       | 1.31         | -1.16      | -1.38        | -2.57      | -1.52        |
| OTTHUMG0 | NULL /// NULL               | ---                  | 0                                       | ---     | 4.88          | 3.44            | 8.42      | 2.58        | 1.24      | -2.20       | 1.50       | 1.58         | 1.74       | -1.22        | 1.60       | 1.79         |
| OTTHUMG0 | NULL /// NULL               | ---                  | 0                                       | ---     | -1.10         | -1.42           | 1.05      | 1.19        | 1.03      | 1.16        | 1.03       | 1.15         | -1.34      | -1.52        | -2.86      | -2.19        |
| OTTHUMG0 | NULL /// NULL               | ---                  | 0                                       | ---     | -1.26         | -1.52           | -2.63     | -3.89       | -1.39     | 1.08        | -1.09      | -1.12        | -3.34      | -2.58        | -2.00      | -1.39        |
| OTTHUMG0 | NULL /// NULL               | ---                  | 0                                       | ---     | -1.06         | -1.13           | -1.06     | 1.01        | -1.11     | -1.15       | -1.12      | 1.16         | -2.35      | -2.34        | -1.96      | -3.13        |
| OTTHUMG0 | NULL /// NULL               | ---                  | 0                                       | ---     | 1.11          | 1.08            | 1.14      | 1.30        | 1.03      | -1.04       | -1.01      | -1.03        | 1.44       | 1.56         | -1.00      | 1.25         |
| OTTHUMG0 | NULL /// NULL               | ---                  | 0                                       | ---     | 1.75          | 2.02            | 1.03      | -1.01       | 1.84      | 1.82        | -1.16      | 1.45         | -1.93      | -2.06        | -1.47      | -2.30        |
| OTTHUMG0 | NULL /// NULL               | ---                  | 0                                       | ---     | 1.05          | -1.02           | 1.06      | 1.05        | -1.08     | 1.02        | -1.46      | -1.34        | -1.72      | -1.33        | -1.93      | -1.46        |
| OTTHUMG0 | NULL /// NULL               | ---                  | 0                                       | ---     | -1.16         | -1.43           | -1.05     | -1.43       | 1.61      | 2.14        | 1.61       | 2.25         | -3.85      | -2.03        | -2.53      | -2.83        |
| OTTHUMG0 | NULL /// NULL               | ---                  | 0                                       | ---     | 1.08          | 1.14            | -1.24     | -1.11       | 1.50      | 1.44        | -1.07      | -1.11        | -1.92      | -1.65        | -1.30      | -1.51        |
| OTTHUMG0 | NULL /// NULL               | ---                  | 0                                       | ---     | 2.41          | 2.05            | 1.97      | 1.85        | -1.18     | -1.19       | -3.11      | -2.09        | -1.19      | -1.66        | 1.13       | -1.32        |
| OTTHUMG0 | NULL /// NULL               | ---                  | 0                                       | ---     | 1.14          | 1.20            | 1.17      | 1.14        | 1.05      | 1.11        | 1.02       | 1.15         | 1.41       | 1.61         | 1.57       | 1.62         |
| OTTHUMG0 | NULL /// NULL               | ---                  | 0                                       | ---     | 1.03          | 1.09            | 1.19      | 1.36        | 1.16      | 1.28        | 1.09       | 1.14         | -1.24      | -1.13        | -3.15      | -2.15        |
| OTTHUMG0 | NULL /// NULL               | ---                  | 0                                       | ---     | -1.23         | -1.10           | 1.05      | 1.08        | 1.02      | 1.13        | -1.16      | 1.14         | -2.93      | -2.70        | -3.98      | -3.76        |
| OTTHUMG0 | NULL /// NULL               | ---                  | 0                                       | ---     | -1.12         | -1.14           | 1.16      | 1.13        | 1.12      | -1.01       | -1.01      | 1.06         | -1.39      | -1.50        | -1.65      | -2.18        |
| OTTHUMG0 | NULL /// NULL               | ---                  | 0                                       | ---     | -1.24         | 1.20            | 1.15      | 1.10        | 1.07      | 1.02        | -2.88      | -1.87        | -2.90      | -4.75        | -2.92      | -3.03        |
| OTTHUMG0 | NULL /// NULL               | ---                  | 0                                       | ---     | -1.12         | -1.21           | -1.00     | -1.03       | 1.06      | 1.07        | -1.27      | 1.03         | -2.05      | -1.97        | -2.12      | -1.52        |
| OTTHUMG0 | NULL /// NULL               | ---                  | 0                                       | ---     | -1.00         | -1.37           | 1.07      | 1.08        | 1.60      | 1.30        | 1.40       | 1.31         | 1.05       | -1.21        | 1.11       | 1.39         |
| OTTHUMG0 | NULL /// NULL               | ---                  | 0                                       | ---     | -1.02         | 1.84            | 1.10      | 1.30        | 1.24      | 1.11        | -1.71      | -1.57        | -3.20      | -3.06        | -1.95      | -2.13        |
| OTTHUMG0 | NULL /// NULL               | ---                  | 0                                       | ---     | -1.50         | 1.30            | -2.24     | -1.99       | 2.51      | 1.07        | 1.82       | 1.29         | -1.26      | -1.26        | 1.63       | -1.21        |
| OTTHUMG0 | NULL /// NULL               | ---                  | 0                                       | ---     | -1.08         | -1.60           | 1.17      | -1.15       | -1.15     | -1.07       | -1.03      | 1.33         | 1.58       | 1.05         | -1.19      | 1.40         |
| OTTHUMG0 | NULL /// NULL               | ---                  | 0                                       | ---     | 1.12          | -1.02           | 1.57      | -1.00       | 2.32      | 1.95        | -1.50      | -1.55        | -1.72      | -1.42        | -4.55      | -3.26        |
| OTTHUMG0 | NULL /// NULL               | ---                  | 0                                       | ---     | 1.81          | 1.41            | 1.19      | 1.02        | -1.10     | 1.04        | -1.15      | -1.09        | -1.97      | -2.32        | -1.96      | -2.11        |
| OTTHUMG0 | NULL /// NULL               | ---                  | 0                                       | ---     | 1.17          | 1.53            | 1.22      | 1.18        | -1.16     | -1.02       | -1.01      | 1.67         | -1.13      | 1.05         | 1.70       | 1.51         |
| OTTHUMG0 | NULL /// NULL               | ---                  | 0                                       | ---     | 1.22          | -1.08           | 1.06      | 1.24        | 1.02      | -1.05       | -1.12      | 1.35         | -2.23      | -2.42        | -2.69      | -4.20        |
| OTTHUMG0 | NULL /// NULL               | ---                  | 0                                       | ---     | -1.12         | -1.12           | -1.05     | 1.11        | -1.06     | -1.07       | -1.11      | -1.03        | -1.01      | -1.16        | -1.07      | -1.28        |
| OTTHUMG0 | NULL /// NULL               | ---                  | 0                                       | ---     | 1.11          | 1.12            | -1.05     | 1.06        | -1.06     | 1.06        | -1.29      | 1.17         | 1.50       | 1.53         | 2.42       | 3.03         |
| OTUB2    | OTU domain, ubiquitin ald   | chr14q32.12          | proteolysis                             | ---     | 1.06          | -1.04           | 1.13      | 1.06        | 1.38      | 1.02        | -1.24      | 1.03         | -1.61      | -1.35        | 1.09       | 1.11         |
| OTUB2    | OTU domain, ubiquitin ald   | chr14q32.12          | proteolysis                             | ---     | -1.16         | 1.06            | 1.04      | 1.74        | -1.50     | -3.81       | -2.07      | -1.35        | 1.87       | 1.99         | 1.87       | 2.42         |
| OTUD1    | OTU domain containing 1     | chr10p12.2           | protein K63-linked deubiquitination     | ---     | 1.14          | 1.19            | -1.06     | -1.16       | -1.16     | -1.01       | 1.05       | 1.01         | 1.47       | 1.39         | 1.73       | 1.35         |
| OTUD1    | OTU domain containing 1     | chr10p12.2           | 0                                       | ---     | 1.13          | 1.18            | -1.03     | -1.18       | -1.18     | -1.05       | 1.05       | -1.02        | 1.57       | 1.55         | 1.89       | 1.42         |
| OTUD4    | OTU domain containing 4     | chr4q31.21           | protein K48-linked deubiquitination     | ---     | 1.23          | -1.12           | 1.06      | -1.28       | 1.00      | 1.25        | 1.08       | -1.16        | 1.85       | 1.74         | 1.58       | 1.29         |
| OTUD4    | OTU domain containing 4     | chr4q31.21           | protein K48-linked deubiquitination     | ---     | 1.03          | 1.13            | -1.01     | -1.70       | -1.13     | -1.18       | -1.06      | 1.36         | 1.53       | 1.36         | 1.63       | 1.05         |
| OTUD4    | OTU domain containing 4     | chr4q31.21           | protein K48-linked deubiquitination     | ---     | -1.20         | -1.16           | -1.01     | -1.05       | 1.20      | 1.02        | -1.18      | -1.14        | 1.32       | 1.38         | 1.26       | 1.09         |
| OTUD7A   | OTU domain containing 7A    | chr15q13.3           | proteolysis                             | ---     | 1.25          | -1.01           | 1.17      | 1.18        | -1.20     | -1.16       | 1.40       | 1.63         | 1.22       | 1.17         | -1.33      | 1.29         |
| OTUD7B   | OTU domain containing 7B    | chr1q21.2            | mucosal immune response                 | ---     | -1.03         | -1.07           | -1.11     | -1.21       | -1.17     | -1.12       | 1.03       | -1.03        | 1.10       | 1.34         | 1.85       | 1.71         |
| OTUD7B   | OTU domain containing 7B    | chr1q21.2            | mucosal immune response                 | ---     | -1.03         | 1.04            | 1.01      | -1.01       | 1.09      | 1.12        | 1.11       | -1.02        | -1.10      | -1.15        | 1.34       | 1.11         |
| OTX1     | orthodenticle homeobox 1    | chr2p13              | regulation of transcription, DNA-depend | ---     | 1.82          | 1.11            | -2.25     | 1.88        | -1.71     | -1.07       | -2.48      | 1.18         | 3.09       | 2.99         | -2.09      | -1.96        |
| OVGP1    | oviductal glycoprotein 1, 1 | chr1p13              | carbohydrate metabolic process          | ---     | 1.16          | 1.05            | -1.11     | -1.03       | 1.40      | 1.09        | 1.03       | 1.37         | 1.52       | 1.09         | 1.93       | 2.00         |
| OVOL2    | ovo-like 2 (Drosophila)     | chr20pter-q11.23     | angiogenesis                            | ---     | -1.84         | -3.39           | -1.48     | 1.10        | -1.06     | 2.98        | -3.35      | -1.35        | 3.41       | 2.07         | -1.19      | -1.13        |

| ID         | Gene Title                                        | Chromosomal Location | 1st Gene Ontology Biological Process                    | Pathway                                         | A2497 30 mins | A2497P' 30 mins | A2497 2 h | A2497P' 2 h | A2497 4 h | A2497P' 4 h | A2497 24 h | A2497P' 24 h | A2497 48 h | A2497P' 48 h | A2497 72 h | A2497P' 72 h |
|------------|---------------------------------------------------|----------------------|---------------------------------------------------------|-------------------------------------------------|---------------|-----------------|-----------|-------------|-----------|-------------|------------|--------------|------------|--------------|------------|--------------|
| OXCT1      | 3-oxoacid CoA transferase                         | chr5p13.1            | brain development                                       | Synthesis_and_Degradation_of_Keton_Bod          | 1.01          | 1.04            | -1.03     | -1.01       | -1.02     | 1.00        | -1.05      | 1.01         | -1.15      | 1.03         | -1.78      | -1.69        |
| OXCT2      | 3-oxoacid CoA transferase                         | chr1p34              | metabolic process                                       | ---                                             | -1.09         | 1.08            | 1.33      | 1.07        | -1.09     | -1.12       | 1.10       | 1.23         | -2.11      | -2.07        | -1.54      | -1.15        |
| OXGR1      | oxoglutarate (alpha-ketoglutarate)                | chr1q32.1            | signal transduction                                     | ---                                             | 5.59          | 7.06            | 1.23      | -1.70       | -1.15     | 1.15        | -1.77      | -1.01        | 3.81       | 1.72         | 1.13       | 1.56         |
| OXNAD1     | oxidoreductase NAD-binding                        | chr3p25-p24          | oxidation-reduction process                             | ---                                             | -1.02         | 1.01            | 1.25      | 1.25        | -1.02     | -1.19       | 1.02       | 1.05         | 1.75       | 1.22         | 1.33       | 1.21         |
| OXR1       | oxidation resistance 1                            | chr8q23              | response to stress                                      | ---                                             | -1.14         | -1.18           | 1.14      | 1.11        | 1.15      | 1.09        | 1.28       | 1.26         | 1.11       | -1.03        | 1.46       | 1.77         |
| OXSM       | 3-oxoacyl-ACP synthase                            | chr3p24.2            | lipid metabolic process                                 | ---                                             | -1.08         | -1.07           | 1.06      | 1.12        | 1.06      | 1.01        | -1.03      | -1.06        | 1.30       | 1.35         | 1.74       | 1.99         |
| P2RX5      | purinergic receptor P2X, ligand-gated ion channel | chr17p13.3           | transport                                               | ---                                             | -1.03         | -1.15           | 1.00      | 1.23        | 1.05      | -1.00       | 1.13       | 1.19         | 1.70       | 1.47         | 1.23       | 1.37         |
| P2RX5-TAX1 | P2RX5-TAX1BP3 readthrough                         | chr17p13.3           | ion transport                                           | ---                                             | 1.10          | 1.20            | 1.03      | -1.07       | 1.03      | -1.13       | -1.00      | 1.02         | 1.06       | -1.08        | -1.36      | -1.61        |
| P2RX5-TAX2 | P2RX5-TAX1BP3 readthrough                         | chr17p13.3           | Rho protein signal transduction                         | ---                                             | -1.05         | 1.01            | -1.12     | -1.03       | -1.13     | -1.06       | -1.01      | 1.01         | 1.10       | 1.13         | -1.33      | -1.31        |
| P2RY11     | purinergic receptor P2Y, G-protein coupled        | chr19p13             | defense response                                        | GPCRDB_Class_A_Rhodopsin-like // GenMAPP        | 1.12          | -1.01           | 1.10      | 1.19        | 1.02      | -1.44       | -1.07      | 1.10         | 1.60       | 1.17         | 2.25       | 2.83         |
| P2RY13     | purinergic receptor P2Y, G-protein coupled        | chr3q24              | signal transduction                                     | GPCRDB_Class_A_Rhodopsin-like // GenMAPP        | -1.52         | -2.55           | -1.17     | 1.04        | 1.24      | 1.21        | -8.36      | -3.39        | 3.29       | 2.79         | -3.78      | 2.00         |
| P2RY14     | purinergic receptor P2Y, G-protein coupled        | chr3q24-q25.1        | immune response                                         | GPCRDB_Class_A_Rhodopsin-like // GenMAPP        | 1.77          | 4.76            | -1.56     | 1.45        | 2.45      | 1.95        | 1.69       | 2.09         | 1.65       | 4.29         | 4.93       | 1.82         |
| P2RY2      | purinergic receptor P2Y, G-protein coupled        | chr11q13.5-q14.1     | cellular ion homeostasis                                | GPCRDB_Class_A_Rhodopsin-like // GenMAPP        | 1.69          | 1.43            | 1.05      | 1.11        | -1.20     | -2.49       | 1.58       | 2.75         | 1.82       | 2.00         | 1.14       | 1.34         |
| P4HA1      | prolyl 4-hydroxylase, alpha chain                 | chr10q21.3-q23.1     | peptidyl-proline hydroxylation to 4-hydroxyproline      | ---                                             | 1.10          | 1.13            | 1.02      | -1.07       | -1.18     | -1.06       | -1.20      | -1.09        | 1.10       | 1.33         | 1.93       | 1.84         |
| P4HA2      | prolyl 4-hydroxylase, alpha chain                 | chr5q31              | peptidyl-proline hydroxylation to 4-hydroxyproline      | ---                                             | -1.07         | -1.12           | 1.06      | -1.01       | 1.04      | 1.05        | 1.17       | 1.09         | 1.64       | 2.18         | 3.27       | 4.34         |
| P4HA3      | prolyl 4-hydroxylase, alpha chain                 | chr11q13.4           | oxidation-reduction process                             | ---                                             | -1.01         | -1.36           | 1.12      | 1.07        | 1.03      | 1.05        | 1.23       | -1.03        | 2.35       | 1.86         | 2.80       | 2.77         |
| P4HB       | prolyl 4-hydroxylase, beta chain                  | chr17q25             | protein folding                                         | ---                                             | -1.14         | -1.18           | -1.00     | -1.07       | 1.09      | 1.10        | 1.06       | -1.03        | 1.19       | 1.23         | 1.31       | 1.52         |
| P4HB       | prolyl 4-hydroxylase, beta chain                  | chr17q25             | protein folding                                         | ---                                             | -1.12         | -1.06           | 1.05      | -1.08       | 1.16      | 1.03        | -1.10      | -1.21        | 1.09       | 1.17         | 1.41       | 1.66         |
| P4HB       | prolyl 4-hydroxylase, beta chain                  | chr17q25             | protein folding                                         | ---                                             | -1.09         | -1.01           | -1.02     | 1.01        | 1.03      | -1.04       | 1.12       | 1.04         | 1.33       | 1.13         | 1.20       | 1.21         |
| PAAF1      | proteasomal ATPase-associated                     | chr11q13.4           | virus-host interaction                                  | ---                                             | -1.03         | 1.00            | 1.02      | 1.08        | -1.02     | -1.06       | 1.21       | 1.20         | 1.47       | 1.37         | 1.45       | 1.60         |
| PABPC1     | poly(A) binding protein, cytoplasmic              | chr8q22.2-q23        | nuclear-transcribed mRNA catabolic process              | Translation_Factors // GenMAPP                  | -1.01         | -1.00           | -1.02     | 1.03        | 1.05      | 1.01        | 1.13       | 1.00         | 1.16       | 1.04         | 1.01       | 1.00         |
| PABPC1L    | poly(A) binding protein, cytoplasmic              | ---                  | ---                                                     | ---                                             | 1.46          | 1.11            | -1.05     | 1.33        | 1.07      | -1.02       | 1.12       | 1.16         | -1.00      | -1.03        | -1.62      | -1.12        |
| PABPC4     | poly(A) binding protein, cytoplasmic              | chr1p34.2            | RNA processing                                          | ---                                             | 1.27          | 1.32            | 1.02      | -1.19       | -1.11     | -1.01       | -1.06      | -1.11        | -1.33      | -1.48        | -1.26      | -1.65        |
| PABPC4L    | poly(A) binding protein, cytoplasmic              | chr4q28.3            | ---                                                     | ---                                             | 1.29          | 1.20            | 1.05      | -1.02       | -1.18     | 1.03        | -1.35      | -1.22        | -1.73      | -1.50        | -1.75      | -2.21        |
| PABPN1     | poly(A) binding protein, nuclear                  | chr14q11.2           | mRNA splicing, via spliceosome                          | mRNA_processing_Reactome // GenMAPP             | 1.25          | 1.24            | -1.16     | -1.12       | 1.11      | 1.06        | 1.18       | 1.16         | 1.13       | 1.34         | -1.15      | -1.36        |
| PACRG-AS1  | PACRG antisense RNA 1                             | chr6q26              | ---                                                     | ---                                             | 1.41          | -3.46           | -1.99     | 1.36        | 5.07      | 7.40        | -1.77      | 1.19         | 3.70       | 7.42         | 6.25       | 5.64         |
| PACRGL     | PARK2 co-regulated-like                           | chr4p15.31           | ---                                                     | ---                                             | -1.08         | -1.10           | 1.14      | 1.16        | 1.05      | -1.04       | 1.07       | 1.19         | 1.51       | 1.09         | 1.47       | 1.72         |
| PACRGL     | PARK2 co-regulated-like                           | chr4p15.31           | ---                                                     | ---                                             | 1.02          | 1.03            | 1.28      | 1.34        | 1.31      | 1.11        | -1.01      | 1.14         | 2.32       | 1.92         | 1.84       | 1.68         |
| PACS1      | phosphofurin acidic cluster                       | chr11q13.1-q13.2     | protein targeting to Golgi                              | ---                                             | -1.07         | -1.25           | 1.13      | 1.03        | 1.21      | 1.10        | 1.20       | 1.09         | 1.16       | 1.00         | 1.22       | 1.19         |
| PACS2      | phosphofurin acidic cluster                       | chr14q32.33          | apoptotic process                                       | ---                                             | 1.09          | 1.05            | 1.03      | 1.16        | 1.10      | 1.14        | -1.06      | -1.19        | -2.03      | -1.87        | -3.32      | -2.93        |
| PACS2      | phosphofurin acidic cluster                       | chr14q32.33          | apoptotic process                                       | ---                                             | 1.13          | 1.00            | -1.08     | 1.01        | 1.25      | -1.18       | -1.05      | -1.18        | -1.83      | -1.99        | -2.47      | -2.06        |
| PADI1      | peptidyl arginine deiminase                       | chr1p36.13           | cellular protein modification process                   | ---                                             | 1.10          | 1.15            | 1.21      | 1.07        | 1.07      | -1.12       | 1.54       | 1.95         | 2.10       | 1.33         | 2.76       | 3.50         |
| PADI2      | peptidyl arginine deiminase                       | chr1p36.13           | cellular protein modification process                   | ---                                             | -1.47         | -1.34           | 1.33      | 1.42        | -1.48     | 1.24        | 1.34       | 2.15         | 3.94       | 3.49         | 4.97       | 5.28         |
| PAFAH1B1   | platelet-activating factor acetyltransferase      | chr17p13.3           | G2                                                      | Wnt_signaling // GenMAPP                        | -1.02         | -1.03           | 1.01      | 1.05        | 1.01      | 1.03        | -1.39      | -1.23        | -2.12      | -2.02        | -2.09      | -1.91        |
| PAFAH1B1   | platelet-activating factor acetyltransferase      | chr17p13.3           | G2                                                      | Wnt_signaling // GenMAPP                        | -1.02         | -1.18           | -1.11     | -1.01       | -1.10     | -1.05       | -1.27      | -1.28        | -1.72      | -1.54        | -1.23      | -1.43        |
| PAFAH1B1   | platelet-activating factor acetyltransferase      | chr17p13.3           | G2                                                      | Wnt_signaling // GenMAPP                        | -1.24         | -1.09           | -1.06     | -1.17       | 1.05      | -1.01       | -1.65      | -1.20        | -2.30      | -2.11        | -2.01      | -1.76        |
| PAFAH1B1   | platelet-activating factor acetyltransferase      | chr17p13.3           | G2                                                      | Wnt_signaling // GenMAPP                        | 1.12          | 1.08            | 1.04      | 1.06        | 1.03      | -1.04       | 1.39       | 1.17         | 1.58       | 1.36         | 1.84       | 1.81         |
| PAFAH1B2   | platelet-activating factor acetyltransferase      | chr11q23             | lipid metabolic process                                 | ---                                             | 1.04          | 1.02            | 1.13      | 1.18        | 1.29      | -1.01       | 1.74       | 1.12         | 1.28       | 1.12         | 1.60       | 1.52         |
| PAFAH1B3   | platelet-activating factor acetyltransferase      | chr19q13.1           | lipid metabolic process                                 | ---                                             | 1.15          | 1.02            | 1.03      | 1.23        | -1.03     | -1.21       | 1.35       | 1.25         | -1.14      | -1.39        | -1.85      | -1.56        |
| PAG1       | phosphoprotein associated with DNA metabolism     | chr8q21.13           | signal transduction                                     | ---                                             | -1.39         | -1.29           | 2.11      | 1.03        | 1.32      | 1.29        | 1.58       | 1.10         | 3.56       | 4.97         | 4.56       | 7.95         |
| PAG1       | phosphoprotein associated with DNA metabolism     | chr8q21.13           | signal transduction                                     | ---                                             | 16.95         | 3.67            | 2.52      | 1.25        | -4.28     | -3.84       | -1.71      | 1.45         | 6.00       | 4.73         | 1.36       | 2.00         |
| PAG1       | phosphoprotein associated with DNA metabolism     | chr8q21.13           | signal transduction                                     | ---                                             | -1.13         | 1.14            | 1.32      | 1.35        | 1.17      | 1.23        | 1.57       | 1.05         | 3.13       | 4.26         | 1.77       | 3.62         |
| PAGE1      | P antigen family, member 1                        | chrXp11.23           | cellular defense response                               | ---                                             | 1.06          | -1.11           | 1.06      | 1.04        | 1.11      | -1.20       | 1.33       | 1.27         | 1.06       | 1.27         | -1.32      | -1.37        |
| PAGR1      | PAXIP1 associated glutamine                       | chr16p11.2           | 0                                                       | ---                                             | -1.04         | -1.12           | 1.02      | -1.11       | 1.21      | 1.05        | -1.17      | -1.13        | -1.45      | -1.64        | -1.03      | -1.28        |
| PAGR1      | PAXIP1 associated glutamine                       | chr16p11.2           | 0                                                       | ---                                             | 1.33          | 1.11            | -1.05     | 1.02        | -1.02     | -1.02       | -1.35      | -1.28        | -1.07      | -1.17        | -1.50      | -1.66        |
| PAH        | phenylalanine hydroxylase                         | chr12q22-q24.2       | L-phenylalanine metabolic process                       | Biogenic_Amine_Synthesis // GenMAPP             | 1.61          | 2.25            | -1.20     | 1.06        | -6.81     | 1.09        | -3.43      | -2.01        | 1.49       | 1.29         | 2.70       | 3.40         |
| PAH        | phenylalanine hydroxylase                         | chr12q22-q24.2       | L-phenylalanine metabolic process                       | Biogenic_Amine_Synthesis // GenMAPP             | 1.91          | -2.73           | 1.22      | 1.07        | 1.94      | 10.04       | 1.64       | 1.36         | 15.50      | 12.97        | 1.27       | -1.24        |
| PAICS      | phosphoribosylaminoimidazole                      | chr4q12              | purine nucleobase metabolic process                     | ---                                             | 1.02          | 1.07            | -1.06     | -1.07       | -1.00     | 1.02        | -1.03      | -1.19        | 1.07       | 1.10         | -1.11      | -1.25        |
| PAICS      | phosphoribosylaminoimidazole                      | chr4q12              | purine nucleobase metabolic process                     | ---                                             | -1.06         | 1.00            | 1.01      | 1.02        | 1.05      | -1.05       | 1.24       | 1.07         | 1.28       | 1.22         | 1.25       | 1.26         |
| PAIP1      | poly(A) binding protein, intracellular            | chr5p12              | nuclear-transcribed mRNA catabolic process              | Translation_Factors // GenMAPP                  | -1.02         | 1.07            | -1.11     | -1.04       | -1.15     | -1.06       | -1.44      | -1.25        | -2.12      | -1.77        | -2.27      | -2.46        |
| PAIP1      | poly(A) binding protein, intracellular            | chr5p12              | nuclear-transcribed mRNA catabolic process              | Translation_Factors // GenMAPP                  | 1.01          | -1.01           | -1.02     | -1.04       | -1.08     | 1.00        | -1.41      | -1.17        | -2.25      | -1.98        | -2.64      | -3.01        |
| PAIP2      | poly(A) binding protein, intracellular            | chr5q31.2            | regulation of translation                               | ---                                             | -1.09         | -1.10           | 1.06      | 1.05        | 1.12      | -1.00       | 1.10       | 1.18         | 1.03       | 1.21         | 1.25       | 1.25         |
| PAK1IP1    | PAK1 interacting protein 1                        | chr6p24.2            | negative regulation of signal transduction              | ---                                             | 1.04          | 1.13            | 1.05      | -1.03       | -1.05     | -1.05       | 1.04       | 1.07         | 1.20       | -1.12        | 1.39       | 1.09         |
| PAK2       | p21 protein (Cdc42/Rac)-activated                 | chr3q329             | protein complex assembly                                | Integrin-mediated_cell_adhesion_KEGG // GenMAPP | -1.07         | -1.18           | 1.05      | 1.07        | 1.06      | 1.10        | 1.13       | 1.06         | -1.32      | -1.21        | -1.32      | -1.27        |
| PAK4       | p21 protein (Cdc42/Rac)-activated                 | chr19q13.2           | protein phosphorylation                                 | Integrin-mediated_cell_adhesion_KEGG // GenMAPP | -1.04         | -1.03           | 1.05      | 1.07        | -1.03     | -1.11       | 1.12       | 1.12         | 1.46       | 1.32         | 1.27       | 1.35         |
| PAK4       | p21 protein (Cdc42/Rac)-activated                 | chr19q13.2           | protein phosphorylation                                 | Integrin-mediated_cell_adhesion_KEGG // GenMAPP | 1.06          | 1.02            | 1.10      | 1.28        | -1.00     | 1.02        | 1.19       | 1.17         | 1.68       | 1.39         | 1.40       | 1.35         |
| PALB2      | partner and localizer of BRCA1                    | chr16p12.2           | double-strand break repair via homologous recombination | ---                                             | 1.14          | 1.20            | 1.09      | 1.03        | 1.08      | 1.10        | 1.01       | -1.05        | -1.48      | -1.42        | -1.02      | -1.12        |
| PALD1      | phosphatase domain containing                     | chr10q22.1           | 0                                                       | ---                                             | 1.13          | 1.28            | -1.09     | -1.38       | -1.17     | -1.28       | 1.08       | 1.14         | 1.13       | 1.05         | -1.38      | -1.50        |
| PALLD      | palladin, cytoskeletal associated                 | chr4q32.3            | cytoskeleton organization                               | ---                                             | -1.00         | 1.00            | 1.02      | -1.15       | 1.12      | 1.00        | 1.12       | 1.01         | 1.34       | 1.22         | 1.89       | 1.57         |
| PALLD      | palladin, cytoskeletal associated                 | chr4q32.3            | cytoskeleton organization                               | ---                                             | -1.04         | 1.04            | -1.03     | -1.05       | -1.01     | -1.02       | 1.09       | 1.01         | 1.31       | 1.23         | 1.47       | 1.35         |
| PALLD      | palladin, cytoskeletal associated                 | chr4q32.3            | cytoskeleton organization                               | ---                                             | -1.07         | -1.04           | -1.00     | -1.11       | -1.08     | -1.10       | 1.20       | 1.14         | 1.91       | 1.37         | 2.09       | 1.89         |
| PALMD      | palmidolipin                                      | chr1p22-p21          | regulation of cell shape                                | ---                                             | -1.03         | 1.02            | -1.07     | -1.10       | 1.02      | -1.01       | 1.23       | -1.09        | -1.36      | -1.59        | -1.02      | -1.37        |
| PAM16      | presequence translocase-associated                | chr16p13.3           | protein targeting to mitochondrion                      | ---                                             | -1.05         | -1.03           | -1.11     | -1.03       | 1.00      | -1.19       | 1.12       | 1.21         | 1.40       | 1.29         | 1.35       | 1.42         |
| PAN2       | PAN2 poly(A) specific ribonuclease                | chr12q13.2           | nuclear-transcribed mRNA catabolic process              | ---                                             | 1.08          | -1.03           | 1.05      | 1.07        | 1.12      | -1.01       | -1.12      | 1.00         | 1.09       | 1.29         | 1.02       | 1.28         |
| PAN3-AS1   | PAN3 antisense RNA 1                              | chr13q12.2           | 0                                                       | ---                                             | 1.21          | 1.34            | 1.06      | 1.37        | 1.46      | 1.25        | 1.07       | -1.09        | -4.99      | -2.44        | -2.84      | -3.36        |
| PANK1      | pantothenate kinase 1                             | chr10q23.31          | vitamin metabolic process                               | ---                                             | 1.03          | -1.14           | 1.04      | 1.05        | -1.06     | 1.05        | -1.26      | -1.09        | -1.90      | -1.36        | -1.42      | -1.77        |

| ID     | Gene Title                                 | Chromosomal Location | 1st Gene Ontology Biological Process                                 | Pathway                             | A2497 30 mins | A2497P' 30 mins | A2497 2 h | A2497P' 2 h | A2497 4 h | A2497P' 4 h | A2497 24 h | A2497P' 24 h | A2497 48 h | A2497P' 48 h | A2497 72 h | A2497P' 72 h |
|--------|--------------------------------------------|----------------------|----------------------------------------------------------------------|-------------------------------------|---------------|-----------------|-----------|-------------|-----------|-------------|------------|--------------|------------|--------------|------------|--------------|
| PANK2  | pantothenate kinase 2                      | chr20p13             | vitamin metabolic process                                            | ---                                 | -1.11         | -1.10           | -1.13     | -1.13       | -1.01     | 1.04        | 1.68       | 1.44         | 2.03       | 1.83         | 1.90       | 1.29         |
| PANK2  | pantothenate kinase 2                      | chr20p13             | vitamin metabolic process                                            | ---                                 | -1.02         | -1.01           | -1.05     | 1.08        | 1.28      | 1.11        | 1.56       | 1.35         | 1.55       | 1.32         | 1.30       | -1.17        |
| PANK2  | pantothenate kinase 2                      | chr20p13             | vitamin metabolic process                                            | ---                                 | 1.14          | 1.33            | 1.15      | 1.25        | 1.18      | 1.05        | 1.09       | -1.04        | -1.60      | -1.47        | -1.23      | -1.28        |
| PANK2  | pantothenate kinase 2                      | chr20p13             | vitamin metabolic process                                            | ---                                 | 1.09          | 1.02            | -1.08     | 1.10        | -1.10     | -1.07       | 1.05       | 1.09         | -1.42      | -1.43        | -1.17      | -1.18        |
| PANK3  | pantothenate kinase 3                      | chr5q34              | coenzyme A biosynthetic process                                      | ---                                 | -1.04         | -1.13           | 1.08      | 1.05        | 1.02      | 1.02        | 1.09       | 1.03         | 1.20       | 1.25         | 1.70       | 1.81         |
| PANK4  | pantothenate kinase 4                      | chr1p36.32           | coenzyme A biosynthetic process                                      | ---                                 | -1.07         | -1.04           | 1.13      | 1.20        | 1.12      | 1.06        | 1.07       | 1.13         | 1.77       | 1.35         | 1.41       | 1.29         |
| PANX1  | pannexin 1                                 | chr11q21             | response to ischemia                                                 | ---                                 | -1.03         | 1.01            | 1.15      | 1.03        | 1.02      | 1.03        | 1.16       | 1.06         | 1.54       | 1.56         | 1.81       | 1.70         |
| PANX2  | pannexin 2                                 | chr22q13.33          | response to ischemia                                                 | ---                                 | -1.32         | -1.39           | 1.20      | 1.05        | 1.30      | 1.15        | -1.11      | -1.04        | 1.63       | 1.49         | 1.96       | 2.59         |
| PANX2  | pannexin 2                                 | chr22q13.33          | response to ischemia                                                 | ---                                 | -1.17         | -1.29           | -1.04     | 1.01        | 1.05      | -1.03       | -1.17      | -1.05        | 1.18       | 1.22         | 1.44       | 1.64         |
| PANX3  | pannexin 3                                 | chr11q24.2           | transport                                                            | ---                                 | 1.55          | 1.83            | 2.89      | -2.81       | 1.79      | 2.25        | -1.87      | 1.38         | 1.25       | -3.86        | 2.24       | 1.08         |
| PAOX   | polyamine oxidase (exo-N4)                 | chr10q26.3           | polyamine metabolic process                                          | ---                                 | 1.48          | 1.11            | -1.05     | 1.68        | 1.01      | -1.17       | 1.15       | 1.21         | -2.82      | -1.74        | -2.82      | -1.06        |
| PAOX   | polyamine oxidase (exo-N4)                 | chr10q26.3           | polyamine metabolic process                                          | ---                                 | 4.25          | 2.61            | -1.49     | 1.32        | 1.14      | 1.07        | 1.28       | 1.21         | 2.03       | -1.18        | -1.46      | 1.07         |
| PAPD4  | PAP associated domain contig               | chr5q14.1            | mRNA processing                                                      | ---                                 | 1.10          | -1.14           | 1.14      | 1.17        | 1.13      | 1.33        | -1.24      | -1.45        | -1.67      | -1.43        | -2.14      | -2.04        |
| PAPD7  | PAP associated domain contig               | chr5p15              | DNA replication                                                      | ---                                 | -1.06         | -1.08           | -1.03     | -1.14       | -1.01     | -1.03       | 1.02       | -1.01        | 1.07       | 1.05         | 1.14       | 1.15         |
| PAPLN  | papilin, proteoglycan-like                 | chr14q24.2           | negative regulation of peptidase activity                            | ---                                 | -1.02         | 1.02            | -1.01     | 1.11        | 1.00      | 1.11        | 1.20       | 1.08         | -1.56      | -1.13        | -2.12      | -1.77        |
| PAPOLA | poly(A) polymerase alpha                   | chr14q32.31          | mRNA splicing, via spliceosome                                       | mRNA_processing_Reactome // GenMAPP | 1.09          | -1.02           | 1.06      | 1.02        | -1.04     | 1.03        | 1.33       | 1.16         | 1.38       | 1.35         | 1.49       | 1.32         |
| PAPOLA | poly(A) polymerase alpha                   | chr14q32.31          | mRNA splicing, via spliceosome                                       | mRNA_processing_Reactome // GenMAPP | -1.01         | 1.03            | -1.02     | -1.09       | 1.04      | -1.03       | 1.22       | 1.09         | 1.46       | 1.41         | 1.37       | 1.22         |
| PAPOLA | poly(A) polymerase alpha                   | chr14q32.31          | mRNA splicing, via spliceosome                                       | mRNA_processing_Reactome // GenMAPP | 1.08          | 1.07            | -1.03     | 1.03        | -1.03     | 1.16        | -1.31      | -1.11        | -1.32      | -1.29        | -1.17      | -1.28        |
| PAPOLA | poly(A) polymerase alpha                   | chr14q32.31          | mRNA splicing, via spliceosome                                       | mRNA_processing_Reactome // GenMAPP | -1.83         | -1.12           | -1.17     | -1.27       | 1.13      | 1.16        | -1.48      | -1.40        | -1.88      | -1.90        | -1.51      | -1.74        |
| PAPOLA | poly(A) polymerase alpha                   | chr14q32.31          | mRNA splicing, via spliceosome                                       | mRNA_processing_Reactome // GenMAPP | 1.02          | 1.14            | 1.15      | 1.07        | 1.10      | 1.11        | -1.34      | -1.17        | -1.82      | -1.60        | -1.51      | -1.55        |
| PAPOLA | poly(A) polymerase alpha                   | chr14q32.31          | mRNA splicing, via spliceosome                                       | mRNA_processing_Reactome // GenMAPP | 1.16          | 1.09            | 1.06      | -1.12       | -1.11     | 1.01        | -1.04      | 1.04         | 1.43       | 1.66         | 1.14       | 1.07         |
| PAPOLG | poly(A) polymerase gamma                   | chr2p16.1            | mRNA polyadenylation                                                 | ---                                 | 1.09          | 1.23            | 1.07      | -1.18       | 1.07      | 1.10        | -1.22      | -1.06        | 1.06       | 1.10         | 1.41       | 1.42         |
| PAPPA  | pregnancy-associated plasminogen activator | chr9q33.2            | proteolysis                                                          | ---                                 | -1.11         | -1.11           | 1.26      | 1.26        | -1.14     | -1.12       | 1.34       | 1.17         | 1.47       | 1.25         | -1.04      | 1.09         |
| PAPPA  | pregnancy-associated plasminogen activator | chr9q33.2            | proteolysis                                                          | ---                                 | -1.11         | 1.04            | -1.01     | 1.13        | 1.13      | 1.21        | 1.94       | 1.45         | 1.42       | 1.29         | 1.02       | 1.31         |
| PAPPA  | pregnancy-associated plasminogen activator | chr9q33.2            | proteolysis                                                          | ---                                 | 1.05          | -1.08           | -1.07     | -1.00       | -1.06     | 1.15        | 1.01       | 1.44         | 1.22       | 1.20         | 1.08       | 1.09         |
| PAPPA2 | pappalysin 2                               | chr1p23-q25          | regulation of cell growth                                            | ---                                 | -3.16         | -1.56           | -1.49     | -5.22       | -1.30     | 2.88        | 1.12       | -4.37        | 17.10      | 1.78         | 2.35       | 8.02         |
| PAPSS1 | 3'-phosphoadenosine 5'-phosphate           | chr4q24              | sulfate assimilation                                                 | ---                                 | 1.16          | 1.21            | -1.03     | -1.05       | -1.05     | -1.02       | -1.19      | -1.13        | -1.65      | -1.48        | -1.62      | -1.80        |
| PAPSS2 | 3'-phosphoadenosine 5'-phosphate           | chr10q24             | sulfate assimilation                                                 | ---                                 | -1.42         | 1.04            | -1.00     | -1.03       | 1.24      | 1.33        | 1.47       | 1.06         | 1.20       | -1.04        | 3.09       | 2.88         |
| PAPSS2 | 3'-phosphoadenosine 5'-phosphate           | chr10q24             | sulfate assimilation                                                 | ---                                 | 1.10          | 1.09            | 1.11      | 1.04        | 1.02      | 1.08        | 1.01       | 1.28         | 1.42       | 1.34         | 1.83       | 1.81         |
| PAPSS2 | 3'-phosphoadenosine 5'-phosphate           | chr10q24             | sulfate assimilation                                                 | ---                                 | 1.09          | 1.10            | 1.21      | -1.12       | -1.01     | 1.11        | 1.01       | -1.07        | 1.32       | 1.35         | 2.22       | 2.04         |
| PAQR4  | progesterin and adiponectin receptor       | chr16p13.3           | 0                                                                    | ---                                 | 1.03          | -1.07           | 1.01      | 1.13        | 1.00      | -1.06       | 1.04       | -1.01        | 1.06       | -1.06        | -1.48      | -1.13        |
| PAQR5  | progesterin and adiponectin receptor       | chr15q23             | multicellular organismal development                                 | ---                                 | 1.01          | -1.32           | 1.12      | -1.07       | 1.14      | 1.09        | 1.55       | 1.06         | 1.04       | 1.11         | 2.08       | 1.68         |
| PAQR5  | progesterin and adiponectin receptor       | chr15q23             | multicellular organismal development                                 | ---                                 | -1.18         | -1.15           | -1.05     | -1.39       | -1.09     | -1.08       | 1.08       | 1.87         | 1.82       | 1.79         | 1.83       | 1.83         |
| PAQR6  | progesterin and adiponectin receptor       | chr1q22              | 0                                                                    | ---                                 | 1.30          | 1.12            | 1.32      | 1.76        | -1.27     | -1.39       | 1.46       | 1.20         | 1.28       | 1.27         | 1.57       | 2.03         |
| PAQR7  | progesterin and adiponectin receptor       | chr1p36.11           | multicellular organismal development                                 | ---                                 | 1.03          | -1.01           | 1.02      | -1.00       | 1.03      | -1.05       | 1.28       | 1.21         | 1.33       | 1.16         | 1.27       | 1.28         |
| PAQR8  | progesterin and adiponectin receptor       | chr6p12.1            | multicellular organismal development                                 | ---                                 | -1.01         | -1.21           | 1.53      | 1.45        | 1.81      | 1.44        | 1.27       | 1.02         | -1.43      | -1.16        | -1.49      | -1.35        |
| PARD3  | par-3 partitioning defective               | chr10p11.21          | microtubule cytoskeleton organization                                | ---                                 | -1.16         | -1.13           | -1.04     | 1.06        | 1.38      | -1.01       | 1.07       | 1.11         | -1.02      | -1.01        | -1.06      | 1.11         |
| PARD3  | par-3 partitioning defective               | chr10p11.21          | microtubule cytoskeleton organization                                | ---                                 | -1.29         | -1.15           | 1.28      | 1.09        | -1.01     | -1.02       | 1.03       | -1.03        | -1.33      | -1.31        | -1.88      | -2.02        |
| PARD3B | par-3 partitioning defective               | chr2q33.3            | cell cycle                                                           | ---                                 | 1.05          | 1.12            | 1.44      | -1.03       | -1.14     | -1.14       | 1.17       | 1.07         | -2.44      | -1.61        | -2.45      | -3.49        |
| PARD6B | par-6 partitioning defective               | chr20q13.13          | protein complex assembly                                             | ---                                 | 1.32          | -1.01           | 1.02      | 1.03        | -1.20     | 1.29        | -1.22      | -2.36        | -1.56      | -1.70        | -2.32      | ---          |
| PARL   | presenilin associated, rhomboid-like       | chr3q27.1            | proteolysis                                                          | ---                                 | -1.05         | -1.07           | -1.11     | -1.07       | 1.00      | -1.07       | 1.03       | 1.10         | 1.20       | 1.11         | 1.20       | 1.22         |
| PARL   | presenilin associated, rhomboid-like       | chr3q27.1            | proteolysis                                                          | ---                                 | -1.02         | -1.09           | 1.00      | -1.03       | 1.07      | 1.12        | -1.03      | 1.01         | -1.01      | 1.13         | 1.04       | 1.07         |
| PARN   | poly(A)-specific ribonuclease              | chr16p13             | nuclear-transcribed mRNA catabolic process                           | ---                                 | -1.15         | -1.13           | 1.02      | 1.03        | -1.05     | -1.04       | -1.13      | -1.04        | -1.49      | -1.31        | -1.03      | 1.01         |
| PARP1  | poly (ADP-ribose) polymerase               | chr14q1-q42          | negative regulation of transcription from RNA polymerase II promoter | Apoptosis_GenMAPP // GenMAPP        | -1.04         | -1.10           | -1.03     | -1.05       | -1.07     | 1.04        | -1.17      | -1.14        | -1.09      | 1.08         | -1.36      | -1.33        |
| PARP10 | poly (ADP-ribose) polymerase               | chr8q24.3            | regulation of chromatin assembly                                     | ---                                 | -1.96         | -3.25           | 1.46      | 2.67        | 1.86      | 2.95        | 1.25       | 2.65         | 2.23       | 3.41         | 1.40       | 1.16         |
| PARP10 | poly (ADP-ribose) polymerase               | chr8q24.3            | regulation of chromatin assembly                                     | ---                                 | 2.66          | 1.94            | 1.05      | -1.61       | -1.00     | -1.40       | -1.04      | 1.43         | 1.37       | 1.49         | 1.67       | 1.33         |
| PARP11 | poly (ADP-ribose) polymerase               | chr12p13.3           | 0                                                                    | ---                                 | 1.16          | 1.13            | -2.36     | -3.41       | 1.07      | 1.23        | 1.67       | -1.37        | 4.31       | 2.54         | 1.63       | 1.84         |
| PARP12 | poly (ADP-ribose) polymerase               | chr7q34              | 0                                                                    | ---                                 | -1.09         | -1.10           | 1.05      | 1.05        | 1.04      | -1.07       | 1.23       | 1.25         | -1.09      | -1.39        | 1.07       | 1.13         |
| PARP14 | poly (ADP-ribose) polymerase               | chr3q21.1            | transcription, DNA-dependent                                         | ---                                 | 1.14          | 1.10            | 1.11      | -1.09       | 1.04      | 1.10        | 1.23       | 1.11         | -1.57      | -1.40        | -1.25      | -1.43        |
| PARP15 | poly (ADP-ribose) polymerase               | chr3q21.1            | transcription, DNA-dependent                                         | ---                                 | -2.52         | -6.79           | -11.44    | -8.87       | -12.77    | -2.29       | 1.26       | 1.43         | 2.18       | 1.11         | -1.43      | -3.41        |
| PARP16 | poly (ADP-ribose) polymerase               | chr15q22.31          | response to unfolded protein                                         | ---                                 | -1.02         | 1.02            | 1.06      | -1.08       | -1.12     | -1.06       | -1.12      | -1.11        | -1.50      | -1.22        | 1.01       | -1.02        |
| PARP2  | poly (ADP-ribose) polymerase               | chr14q11.2-q12       | DNA repair                                                           | ---                                 | -1.07         | -1.01           | -1.01     | 1.02        | 1.05      | 1.05        | -1.05      | -1.09        | 1.26       | 1.25         | 1.54       | 1.56         |
| PARP2  | poly (ADP-ribose) polymerase               | chr14q11.2-q12       | DNA repair                                                           | ---                                 | 1.03          | 1.01            | -1.06     | -1.01       | 1.08      | 1.08        | -1.05      | -1.07        | 1.42       | 1.40         | 1.52       | 1.59         |
| PARP2  | poly (ADP-ribose) polymerase               | chr14q11.2-q12       | DNA repair                                                           | ---                                 | 1.05          | -1.00           | -1.03     | -1.01       | 1.03      | -1.09       | -1.06      | -1.05        | 1.32       | 1.27         | 1.60       | 1.70         |
| PARP3  | poly (ADP-ribose) polymerase               | chr3p21.31-p21.1     | DNA repair                                                           | ---                                 | -1.08         | -1.05           | -1.02     | -1.35       | -1.15     | 1.06        | -1.39      | -1.01        | -1.56      | -1.04        | -1.35      | -1.78        |
| PARP8  | poly (ADP-ribose) polymerase               | chr5q11.1            | 0                                                                    | ---                                 | 1.03          | 1.04            | -1.08     | -1.09       | 1.22      | 1.22        | -1.22      | 1.28         | -2.67      | -2.47        | -3.98      | -3.39        |
| PARP9  | poly (ADP-ribose) polymerase               | chr3q21              | DNA repair                                                           | ---                                 | 1.03          | -1.01           | 1.05      | -1.08       | 1.22      | 1.06        | 1.48       | 1.20         | -1.21      | -1.47        | -1.57      | -1.77        |
| PARP9  | poly (ADP-ribose) polymerase               | chr3q21              | DNA repair                                                           | ---                                 | -1.15         | -1.18           | -1.03     | -1.10       | 1.13      | -1.06       | 1.40       | 1.48         | -1.40      | -1.33        | -1.81      | -1.84        |
| PARBP  | PARP1 binding protein                      | chr12q23.2           | DNA repair                                                           | ---                                 | 1.00          | -1.03           | 1.00      | -1.02       | -1.18     | -1.02       | -1.06      | 1.08         | -2.07      | -1.51        | -1.42      | -1.54        |
| PARBP  | PARP1 binding protein                      | chr12q23.2           | DNA repair                                                           | ---                                 | 1.03          | 1.10            | -1.00     | -1.05       | 1.12      | -1.07       | 1.16       | -1.06        | -1.29      | -1.18        | -1.27      | -1.25        |
| PARBP  | PARP1 binding protein                      | chr12q23.2           | DNA repair                                                           | ---                                 | 1.22          | -1.06           | 1.33      | 1.39        | 1.22      | 1.18        | 1.23       | 1.55         | 3.13       | 1.86         | 2.62       | 2.79         |
| PARVA  | parvin, alpha                              | chr11p15.3           | angiogenesis                                                         | ---                                 | 1.92          | 1.73            | 1.08      | 1.02        | 1.29      | -1.10       | 1.48       | 1.63         | -2.97      | -2.12        | -2.07      | -3.33        |
| PARVA  | parvin, alpha                              | chr11p15.3           | angiogenesis                                                         | ---                                 | 1.03          | 1.02            | -1.05     | 1.11        | -1.05     | 1.23        | -1.07      | 1.08         | -1.38      | -1.18        | -2.40      | -2.69        |
| PARVA  | parvin, alpha                              | chr11p15.3           | angiogenesis                                                         | ---                                 | 1.03          | -1.27           | 1.07      | -1.24       | 1.44      | 1.37        | -1.50      | -1.37        | -2.69      | -1.80        | -2.46      | -3.49        |
| PARVA  | parvin, alpha                              | chr11p15.3           | angiogenesis                                                         | ---                                 | 1.02          | 1.07            | 1.12      | -1.00       | 1.20      | -1.04       | 1.12       | 1.12         | -2.92      | -2.11        | -3.17      | -2.88        |
| PARVA  | parvin, alpha                              | chr11p15.3           | angiogenesis                                                         | ---                                 | 1.10          | 1.11            | 1.04      | -1.08       | 1.03      | -1.02       | -1.00      | -1.12        | -1.38      | -1.31        | -2.03      | -1.95        |

| ID          | Gene Title                   | Chromosomal Location | 1st Gene Ontology Biological Process      | Pathway                        | A2497 30 mins | A2497P' 30 mins | A2497 2 h | A2497P' 2 h | A2497 4 h | A2497P' 4 h | A2497 24 h | A2497P' 24 h | A2497 48 h | A2497P' 48 h | A2497 72 h | A2497P' 72 h |
|-------------|------------------------------|----------------------|-------------------------------------------|--------------------------------|---------------|-----------------|-----------|-------------|-----------|-------------|------------|--------------|------------|--------------|------------|--------------|
| PARVA       | parvin, alpha                | chr11p15.3           | angiogenesis                              | ---                            | -1.04         | 1.02            | 1.07      | 1.04        | 1.05      | -1.03       | -1.10      | -1.02        | -2.15      | -1.96        | -2.71      | -2.79        |
| PARVB       | parvin, beta                 | chr22q13.2-q13.33    | cell adhesion                             | ---                            | 1.01          | -1.03           | 1.04      | 1.08        | -1.01     | 1.00        | 1.10       | 1.05         | 1.46       | 1.30         | 1.26       | 1.27         |
| PASK        | PAS domain containing ser    | chr2q37.3            | regulation of transcription, DNA-depend   | ---                            | 1.62          | 1.34            | 1.16      | 1.28        | 1.17      | 1.10        | 1.04       | -1.03        | -1.10      | -1.73        | -1.07      | -1.30        |
| PASK        | PAS domain containing ser    | chr2q37.3            | regulation of transcription, DNA-depend   | ---                            | 1.15          | 1.07            | -1.02     | -1.05       | 1.14      | 1.11        | -1.15      | -1.26        | -1.32      | -1.47        | -1.48      | -1.37        |
| PASK        | PAS domain containing ser    | chr2q37.3            | regulation of transcription, DNA-depend   | ---                            | -1.44         | -1.84           | 1.32      | 1.42        | 1.89      | 1.52        | 1.70       | 1.76         | -1.15      | -1.12        | -1.76      | -1.09        |
| PATE2       | prostate and testis expres   | chr11q24.2           | 0                                         | ---                            | 1.60          | 1.10            | -2.69     | -1.21       | -3.59     | -2.64       | -4.69      | -2.73        | -1.78      | -1.33        | 3.63       | 4.33         |
| PATL1       | protein associated with top  | chr11q12.1           | nuclear-transcribed mRNA catabolic pro    | ---                            | 1.55          | 1.66            | -1.05     | 1.05        | 1.06      | -1.09       | 1.43       | 1.31         | 1.30       | 1.38         | 1.62       | 1.63         |
| PATZ1       | POZ (BTB) and AT hook c      | chr22q12.2           | transcription, DNA-dependent              | ---                            | -1.16         | -1.10           | 1.11      | -1.17       | 1.34      | -1.68       | 1.36       | -1.05        | -1.27      | 1.19         | -2.41      | -1.65        |
| PATZ1       | POZ (BTB) and AT hook c      | chr22q12.2           | transcription, DNA-dependent              | ---                            | -1.19         | -1.22           | 1.13      | 1.12        | -1.17     | 1.26        | -1.19      | -1.13        | -1.11      | -1.50        | -1.23      | -1.14        |
| PATZ1       | POZ (BTB) and AT hook c      | chr22q12.2           | transcription, DNA-dependent              | Translation_Factors // GenMAPP | -1.14         | -1.08           | -1.11     | -1.08       | -1.06     | -1.03       | 1.05       | 1.01         | -1.19      | -1.15        | -1.06      | -1.05        |
| PAWR        | PRKC, apoptosis, WT1, reg    | chr12q21             | negative regulation of transcription from | ---                            | 1.33          | 1.21            | 1.08      | 1.04        | -1.14     | -1.02       | 1.23       | 1.55         | 1.52       | 1.34         | 1.97       | 1.33         |
| PAWR        | PRKC, apoptosis, WT1, reg    | chr12q21             | negative regulation of transcription from | ---                            | 1.09          | 1.15            | 1.06      | -1.00       | -1.04     | 1.09        | -1.29      | -1.14        | -1.43      | -1.37        | -1.40      | -1.76        |
| PAWR        | PRKC, apoptosis, WT1, reg    | chr12q21             | negative regulation of transcription from | ---                            | 1.07          | 1.02            | 1.11      | -1.23       | -1.03     | 1.07        | -1.16      | -1.13        | -1.32      | -1.40        | -1.35      | -1.53        |
| PAWR        | PRKC, apoptosis, WT1, reg    | chr12q21             | negative regulation of transcription from | ---                            | 1.11          | 1.14            | 1.04      | 1.14        | -1.07     | 1.17        | -1.46      | -1.28        | -1.27      | -1.46        | -1.56      | -1.88        |
| PAWR        | PRKC, apoptosis, WT1, reg    | chr12q21             | negative regulation of transcription from | ---                            | 1.15          | 1.17            | -1.12     | -1.08       | -1.04     | -1.13       | -1.06      | 1.12         | 1.29       | 1.23         | 2.16       | 1.92         |
| PAX2        | paired box 2                 | chr10q24             | negative regulation of transcription from | ---                            | 1.89          | 1.98            | -1.14     | 1.18        | -1.09     | -1.03       | 1.23       | 1.79         | 1.04       | 1.30         | -1.29      | -1.01        |
| PAX3        | paired box 3                 | chr2q35              | negative regulation of transcription from | ---                            | -9.25         | -5.94           | -1.43     | -1.59       | 1.39      | 1.24        | -1.74      | -2.04        | 2.22       | 3.97         | -1.82      | 1.13         |
| PAX6        | paired box 6                 | chr11p13             | blood vessel development                  | ---                            | -1.12         | -1.06           | -1.01     | 1.02        | 1.19      | 1.09        | -1.13      | -1.10        | 1.00       | 1.02         | 1.16       | 1.13         |
| PAXBPI      | PAX3 and PAX7 binding p      | chr21q21.3           | transcription, DNA-dependent              | ---                            | 1.17          | 1.16            | 1.12      | 1.00        | 1.04      | 1.03        | -1.33      | -1.32        | -1.79      | -1.80        | -1.16      | -1.43        |
| PAXBPI      | PAX3 and PAX7 binding p      | chr21q21.3           | transcription, DNA-dependent              | ---                            | 1.33          | -1.03           | -1.05     | 1.06        | 1.19      | 1.27        | 2.02       | 1.36         | 1.78       | 1.35         | 1.04       | -1.02        |
| PAXBPI-AS   | PAXBPI antisense RNA 1       | ---                  | 0                                         | ---                            | -1.09         | -1.07           | 1.09      | 1.07        | 1.34      | 1.31        | 1.03       | -1.04        | -2.11      | -1.56        | -1.85      | -1.79        |
| PBDC1       | polysaccharide biosynthes    | chrXq13.3            | 0                                         | ---                            | -1.12         | -1.02           | 1.18      | 1.05        | 1.11      | 1.10        | -1.09      | -1.21        | -1.13      | -1.08        | -1.13      | -1.20        |
| PBK         | PDZ binding kinase           | chr8p21.2            | protein phosphorylation                   | ---                            | 1.12          | 1.07            | -1.03     | -1.10       | -1.02     | 1.04        | -1.15      | -1.12        | 1.03       | 1.13         | 1.22       | 1.18         |
| PBLD        | phenazine biosynthesis-like  | chr10q21.3           | biosynthetic process                      | ---                            | -1.03         | 1.03            | 1.04      | -1.02       | 1.20      | 1.35        | -1.01      | -1.01        | -1.65      | -1.47        | -1.81      | -1.89        |
| PBOV1       | prostate and breast cancer   | chr6q23.3            | 0                                         | ---                            | 8.97          | 10.45           | -1.06     | -1.29       | 1.44      | -4.86       | 1.96       | 1.94         | -1.95      | -2.11        | 8.60       | 9.13         |
| PBRM1       | polybromo 1                  | chr3p21              | placenta development                      | ---                            | 1.14          | 1.18            | -1.49     | -1.52       | -1.06     | 1.04        | -1.29      | -4.68        | -2.86      | -1.60        | -1.98      | -1.98        |
| PBRM1       | polybromo 1                  | chr3p21              | placenta development                      | ---                            | 1.01          | -1.42           | 1.01      | -1.26       | 1.08      | 1.08        | -1.05      | -1.05        | -3.99      | -3.59        | -2.18      | -2.18        |
| PBRM1       | polybromo 1                  | chr3p21              | placenta development                      | ---                            | 1.05          | 1.14            | -1.01     | -1.10       | -1.20     | -1.02       | -1.33      | -1.24        | -2.13      | -1.81        | -1.82      | -1.99        |
| PBRM1       | polybromo 1                  | chr3p21              | placenta development                      | ---                            | 1.06          | 1.07            | -1.01     | -1.14       | -1.10     | 1.02        | -1.22      | -1.23        | -2.30      | -1.75        | -1.59      | -1.76        |
| PBX1        | pre-B-cell leukemia homeo    | chr1q23              | urogenital system development             | ---                            | 1.02          | 1.07            | -1.08     | 1.02        | -1.12     | 1.04        | -1.33      | -1.07        | -2.52      | -1.89        | -2.29      | -2.78        |
| PBX1        | pre-B-cell leukemia homeo    | chr1q23              | G1 phase of mitotic cell cycle            | ---                            | -1.21         | -1.33           | 1.03      | 1.03        | 1.20      | -1.06       | -1.01      | 1.23         | -1.41      | -1.61        | -1.65      | -1.66        |
| PBX1        | pre-B-cell leukemia homeo    | chr1q23              | urogenital system development             | ---                            | -1.13         | -1.01           | -1.03     | -1.14       | 1.04      | -1.02       | -1.09      | -1.03        | -2.62      | -2.08        | -2.14      | -2.47        |
| PBX3        | pre-B-cell leukemia homeo    | chr9q33.3            | regulation of respiratory gaseous exchan  | ---                            | 1.09          | 1.09            | -1.02     | -1.02       | 1.18      | -1.10       | -1.08      | -1.10        | -1.70      | -1.57        | -1.41      | -1.41        |
| PBXIP1      | pre-B-cell leukemia homeo    | chr1q21.3            | multicellular organismal development      | ---                            | -1.04         | -1.01           | -1.03     | 1.06        | -1.07     | -1.13       | 1.14       | 1.25         | -1.22      | -1.10        | -1.16      | -1.12        |
| PBXIP1      | pre-B-cell leukemia homeo    | chr1q21.3            | multicellular organismal development      | ---                            | 1.07          | 1.06            | -1.02     | 1.03        | -1.10     | -1.05       | 1.09       | 1.15         | -1.26      | -1.15        | -1.22      | -1.26        |
| PCAT6       | prostate cancer associated t | ---                  | carbohydrate metabolic process            | ---                            | -1.34         | -1.57           | 1.14      | 1.35        | 1.31      | 1.28        | 1.17       | 1.08         | 1.50       | 1.46         | 2.33       | 3.30         |
| PCBD2       | pterin-4 alpha-carbinolami   | chr5q31.1            | tetrahydropterin biosynthetic process     | Glycogen_Metabolism // GenMAPP | -1.07         | -1.15           | 1.28      | -1.16       | 1.37      | 1.48        | 1.42       | 1.01         | -2.07      | -1.25        | -3.36      | -5.11        |
| PCBD2       | pterin-4 alpha-carbinolami   | chr5q31.1            | tetrahydropterin biosynthetic process     | Glycogen_Metabolism // GenMAPP | 1.28          | 1.38            | 1.35      | 1.14        | 1.36      | 1.17        | -1.26      | -1.22        | -2.46      | -2.24        | -1.82      | -1.96        |
| PCBP1-AS1   | NULL                         | ---                  | 0                                         | ---                            | -1.06         | -2.80           | 1.07      | -1.29       | 1.27      | 1.41        | -1.39      | -1.74        | -2.86      | -2.06        | -2.52      | -2.65        |
| PCBP1-AS1   | PCBP1 antisense RNA 1        | chr2p14              | 0                                         | ---                            | 1.05          | -1.07           | -1.05     | -1.12       | 1.31      | 1.07        | -1.04      | 1.02         | -1.94      | -1.63        | 1.15       | 1.15         |
| PCBP2       | poly(rC) binding protein 2   | chr12q13.12-q13.13   | mRNA splicing, via spliceosome            | ---                            | 1.11          | -1.04           | 1.01      | -1.05       | 1.11      | 1.14        | -1.09      | 1.02         | -1.38      | -1.14        | -1.70      | -1.68        |
| PCBP2       | poly(rC) binding protein 2   | chr12q13.12-q13.13   | mRNA splicing, via spliceosome            | ---                            | 1.47          | 1.22            | 1.08      | -1.07       | 1.32      | 1.65        | -1.25      | -1.41        | -2.23      | -1.85        | -1.69      | -1.37        |
| PCBP2       | poly(rC) binding protein 2   | chr12q13.12-q13.13   | mRNA splicing, via spliceosome            | ---                            | 1.09          | 1.03            | -1.01     | -1.04       | 1.05      | 1.02        | -1.13      | 1.05         | -1.34      | -1.29        | -1.56      | -1.50        |
| PCCA        | propionyl CoA carboxylase    | chr13q32             | fatty acid beta-oxidation                 | ---                            | -1.04         | -1.09           | 1.05      | 1.13        | 1.10      | 1.04        | 1.08       | 1.08         | -1.17      | -1.07        | -1.21      | -1.05        |
| PCCB        | propionyl CoA carboxylase    | chr3q21-q22          | fatty acid biosynthetic process           | ---                            | -1.03         | -1.14           | 1.04      | 1.10        | 1.02      | -1.05       | 1.35       | 1.13         | 1.67       | 1.44         | 1.36       | 1.48         |
| PCDH1       | protocadherin 1              | chr5q31.3            | cell adhesion                             | ---                            | -1.01         | 1.99            | -2.47     | -1.69       | 1.02      | 1.65        | 4.78       | 5.42         | 1.15       | 5.05         | -5.93      | -1.86        |
| PCDH11X /// | protocadherin 11 X-linked    | chrXq21.3 /// chrYp  | cell adhesion                             | ---                            | 1.90          | 1.41            | -1.43     | -1.28       | 1.88      | 1.33        | 1.58       | 1.09         | -2.28      | -1.86        | -5.69      | -1.59        |
| PCDH15      | protocadherin-related 15     | chr10q21.1           | startle response                          | ---                            | 4.79          | 1.86            | 1.27      | -4.37       | 1.50      | -1.55       | 16.73      | 15.26        | -1.88      | -6.78        | 1.10       | 1.45         |
| PCDH17      | protocadherin 17             | chr13q21.1           | cell adhesion                             | ---                            | 1.38          | 1.50            | -1.32     | -1.27       | -1.05     | -1.96       | 1.07       | -1.34        | -4.68      | -2.68        | -12.05     | -5.44        |
| PCDH17      | protocadherin 17             | chr13q21.1           | cell adhesion                             | ---                            | 1.61          | 1.35            | 1.25      | 1.51        | -1.16     | -1.05       | -1.57      | -1.20        | -10.63     | -10.25       | -3.36      | -5.35        |
| PCDH17      | protocadherin 17             | chr13q21.1           | cell adhesion                             | ---                            | 1.27          | -1.32           | -1.13     | -1.26       | -2.38     | -1.72       | 2.06       | 1.79         | -1.92      | -1.17        | -3.13      | -2.07        |
| PCDH18      | protocadherin 18             | chr4q31              | cell adhesion                             | ---                            | -1.11         | -1.54           | 2.26      | 1.05        | -2.58     | -2.58       | -3.17      | -2.00        | 1.06       | 1.55         | -1.68      | -1.67        |
| PCDH7       | protocadherin 7              | chr4p15              | cell adhesion                             | ---                            | -1.01         | -1.01           | 1.00      | -1.18       | 1.11      | 1.06        | 1.11       | 1.15         | -1.41      | -1.06        | -1.54      | -1.30        |
| PCDH7       | protocadherin 7              | chr4p15              | cell adhesion                             | ---                            | 1.08          | -1.04           | 1.04      | -1.02       | -1.11     | 1.07        | 1.12       | 1.19         | -1.77      | -1.32        | -2.23      | -1.76        |
| PCDH7       | protocadherin 7              | chr4p15              | cell adhesion                             | ---                            | 1.20          | 1.21            | 1.05      | 1.31        | 1.17      | 1.06        | 1.02       | 1.12         | -1.18      | 1.06         | -1.39      | -1.34        |
| PCDH9       | protocadherin 9              | chr13q21.32          | cell adhesion                             | ---                            | 1.11          | 1.03            | -1.18     | -1.02       | -1.30     | 1.09        | -1.25      | 1.00         | -2.63      | -2.64        | -7.23      | -7.66        |
| PCDHA1 ///  | protocadherin alpha 1 ///    | chr5q31              | cell adhesion                             | ---                            | 1.08          | 1.11            | 1.33      | 1.01        | -1.15     | -1.04       | -1.33      | 1.05         | -3.29      | -1.92        | -6.61      | -5.15        |
| PCDHA1 ///  | protocadherin alpha 1 ///    | chr5q31              | cell adhesion                             | ---                            | 1.19          | -1.10           | -1.33     | -1.23       | -1.15     | -1.10       | -1.41      | -1.22        | -4.79      | -3.09        | -7.17      | -13.64       |
| PCDHA1 ///  | protocadherin alpha 1 ///    | chr5q31              | cell adhesion                             | ---                            | -1.38         | -1.02           | 1.43      | 1.11        | -1.25     | 1.37        | -1.48      | -1.56        | -2.43      | -3.30        | -5.46      | -3.64        |
| PCDHA2      | protocadherin alpha 2        | chr5q31              | cell adhesion                             | ---                            | 3.84          | 8.14            | 2.04      | 1.12        | -2.65     | -5.58       | 1.65       | -2.28        | 4.28       | 1.97         | 3.86       | 8.25         |
| PCDHA9      | protocadherin alpha 9        | chr5q31              | cell adhesion                             | ---                            | 1.02          | -1.17           | 1.27      | 1.68        | -3.35     | -1.13       | 1.38       | 1.52         | 1.04       | -1.06        | -1.77      | 1.39         |
| PCDHAC2     | protocadherin alpha subfam   | chr5q31              | cell adhesion                             | ---                            | -1.21         | -1.11           | -1.01     | -1.49       | -1.41     | -1.07       | -1.10      | -1.84        | -2.50      | -4.13        | -2.35      | -4.24        |
| PCDHB11     | protocadherin beta 11        | chr5q31              | cell adhesion                             | ---                            | 1.16          | 1.22            | -1.64     | 1.41        | 1.20      | -2.76       | 1.97       | 1.31         | 4.21       | 1.46         | -1.68      | 1.35         |
| PCDHB14     | protocadherin beta 14        | chr5q31              | cell adhesion                             | ---                            | -1.10         | -1.06           | 1.16      | 1.10        | -1.09     | 1.15        | -1.06      | 1.04         | -1.46      | -1.37        | -1.47      | -1.62        |
| PCDHB16     | protocadherin beta 16        | chr5q31              | cell adhesion                             | ---                            | -1.35         | 1.13            | 1.77      | 1.70        | 1.08      | 1.62        | -1.60      | -1.03        | -1.29      | -1.68        | -2.64      | -5.54        |
| PCDHB3      | protocadherin beta 3         | chr5q31              | cell adhesion                             | ---                            | 1.14          | 1.97            | 1.61      | -2.34       | 1.21      | -2.14       | 1.19       | 2.37         | 1.22       | 1.07         | 1.34       | -1.45        |

| ID         | Gene Title                                                                  | Chromosomal Location | 1st Gene Ontology Biological Process        | Pathway                                  | A2497 30 mins | A2497P' 30 mins | A2497 2 h | A2497P' 2 h | A2497 4 h | A2497P' 4 h | A2497 24 h | A2497P' 24 h | A2497 48 h | A2497P' 48 h | A2497 72 h | A2497P' 72 h |
|------------|-----------------------------------------------------------------------------|----------------------|---------------------------------------------|------------------------------------------|---------------|-----------------|-----------|-------------|-----------|-------------|------------|--------------|------------|--------------|------------|--------------|
| PCDHB3     | protocadherin beta 3                                                        | chr5q31              | cell adhesion                               | ---                                      | -1.97         | 1.10            | 2.70      | 2.45        | 1.69      | -2.33       | -3.40      | -1.27        | -1.81      | -1.58        | 1.38       | 12.14        |
| PCDHGA1    | protocadherin gamma subfamily 1                                             | chr5q31              | cell adhesion                               | ---                                      | -1.06         | -1.06           | 1.34      | 1.24        | -1.06     | -1.24       | -1.15      | -1.08        | 1.33       | 1.12         | -1.13      | 1.19         |
| PCDHGA1    | protocadherin gamma subfamily 1                                             | chr5q31              | cell adhesion                               | ---                                      | 1.01          | -1.05           | 1.34      | -1.10       | 1.09      | 1.12        | -1.51      | -1.25        | 1.46       | 1.09         | 1.06       | 1.25         |
| PCED1B     | PC-esterase domain containing 1                                             | chr12q13.11          | 0                                           | ---                                      | 1.19          | -1.02           | -1.35     | -1.25       | 1.47      | 1.03        | 1.90       | 1.42         | 2.90       | 2.32         | 2.47       | 2.27         |
| PCED1B-AS1 | PCED1B antisense RNA 1                                                      | chr12q13.11          | 0                                           | ---                                      | -1.92         | -1.88           | -1.62     | -1.29       | -1.47     | -1.30       | -1.91      | -1.92        | 1.17       | 1.15         | 1.21       | 1.30         |
| PCF11      | PCF11, cleavage and polyadenylation specificity factor subunit 11           | chr11q13             | mRNA splicing, via spliceosome              | ---                                      | 1.32          | 1.47            | 1.13      | -1.10       | -1.13     | -1.10       | -2.12      | -1.46        | -1.47      | -1.69        | -1.51      | -1.83        |
| PCGF1      | polycomb group ring finger 1                                                | chr2p13.1            | transcription, DNA-dependent                | ---                                      | -1.17         | -1.29           | 1.00      | -1.01       | -1.10     | -1.14       | 1.14       | -1.03        | 1.67       | 1.64         | 1.69       | 1.71         |
| PCGF1      | polycomb group ring finger 1                                                | chr2p13.1            | transcription, DNA-dependent                | ---                                      | -1.06         | -1.15           | 1.07      | 1.03        | 1.10      | 1.08        | 1.11       | -1.06        | 1.63       | 1.50         | 1.70       | 1.55         |
| PCGF3      | polycomb group ring finger 3                                                | chr4p16.3            | transcription, DNA-dependent                | ---                                      | -1.05         | -1.24           | -1.04     | -1.05       | -1.13     | -1.36       | 1.63       | 1.44         | 1.95       | 1.71         | 1.53       | 1.24         |
| PCGF3      | polycomb group ring finger 3                                                | chr4p16.3            | transcription, DNA-dependent                | ---                                      | 1.03          | 1.13            | 1.02      | -1.04       | 1.48      | 1.06        | -1.33      | -1.08        | 1.07       | 1.13         | 1.25       | 1.27         |
| PCGF5      | polycomb group ring finger 5                                                | chr10q23.32          | transcription, DNA-dependent                | ---                                      | 1.17          | 1.22            | 1.06      | -1.00       | -1.04     | 1.01        | 1.15       | 1.02         | 1.01       | 1.10         | 1.26       | -1.13        |
| PCGF5      | polycomb group ring finger 5                                                | chr10q23.32          | transcription, DNA-dependent                | ---                                      | 1.16          | 1.36            | 1.06      | -1.06       | -1.08     | 1.31        | 1.25       | -1.29        | 1.13       | 1.53         | 1.14       | -1.24        |
| PCGF5      | polycomb group ring finger 5                                                | chr10q23.32          | transcription, DNA-dependent                | ---                                      | -1.01         | 1.10            | 1.08      | 1.14        | 1.22      | 1.26        | 1.08       | 1.06         | 2.60       | 1.75         | 1.40       | 1.86         |
| PCGF5      | polycomb group ring finger 5                                                | chr10q23.32          | transcription, DNA-dependent                | ---                                      | -1.12         | 1.01            | -1.02     | -1.15       | 1.17      | 1.11        | 1.06       | 1.31         | 1.95       | 1.57         | 1.23       | 1.10         |
| PCID2      | PCI domain containing 2                                                     | chr13q34             | negative regulation of apoptotic process    | ---                                      | 1.05          | 1.10            | 1.04      | -1.14       | 1.03      | -1.04       | 1.02       | -1.11        | -1.53      | -1.59        | -1.70      | -2.15        |
| PCIF1      | PDX1 C-terminal inhibiting 1                                                | chr20q13.12          | negative regulation of phosphatase activity | ---                                      | -1.06         | -1.27           | -1.09     | 1.11        | -1.14     | -1.04       | 1.31       | 1.27         | 1.22       | 1.24         | 1.28       | 1.55         |
| PCIF1      | PDX1 C-terminal inhibiting 1                                                | chr20q13.12          | negative regulation of phosphatase activity | ---                                      | -1.08         | -1.17           | -1.11     | 1.02        | 1.03      | 1.17        | -1.16      | -1.03        | 1.59       | 1.43         | 1.26       | 1.22         |
| PCIF1      | PDX1 C-terminal inhibiting 1                                                | chr20q13.12          | negative regulation of phosphatase activity | ---                                      | -1.09         | -1.17           | 1.06      | 1.23        | 1.47      | 1.24        | -1.10      | -1.23        | 1.71       | 1.43         | 1.19       | 1.15         |
| PCK1       | phosphoenolpyruvate carboxykinase 1                                         | chr20q13.11          | carbohydrate metabolic process              | Glycolysis_and_Gluconeogenesis // GenMap | 1.28          | 1.28            | 1.29      | 1.67        | 3.76      | 2.33        | 1.01       | 1.03         | -2.07      | -1.29        | -1.72      | -1.36        |
| PKC2       | phosphoenolpyruvate carboxykinase 2                                         | chr14q11.2           | carbohydrate metabolic process              | ---                                      | -1.02         | 1.03            | -1.03     | 1.16        | -1.03     | -1.16       | 1.28       | 1.14         | 1.33       | 1.20         | -1.48      | -1.25        |
| CLO        | piccolo presynaptic cytomatrix protein 1                                    | chr7q11.23-q21.3     | transport                                   | ---                                      | -1.09         | -1.17           | 1.14      | 1.11        | 1.23      | 1.11        | -1.40      | -1.49        | -2.35      | -3.07        | -3.62      | -28.34       |
| PCM1       | pericentriolar material 1                                                   | chr8p22-p21.3        | G2                                          | ---                                      | -1.05         | -1.05           | -1.01     | 1.01        | 1.04      | 1.06        | 1.01       | 1.07         | -1.41      | -1.33        | -1.58      | -1.31        |
| PCM1       | pericentriolar material 1                                                   | chr8p22-p21.3        | G2                                          | ---                                      | 1.01          | -1.02           | -1.02     | 1.03        | -1.09     | -1.02       | -1.11      | 1.14         | -1.42      | -1.36        | -1.58      | -1.26        |
| PCM1       | pericentriolar material 1                                                   | chr8p22-p21.3        | G2                                          | ---                                      | 1.28          | 1.01            | 1.12      | 1.15        | 1.17      | 1.50        | -2.01      | -1.36        | -1.62      | -1.24        | -2.14      | -2.80        |
| PCM1       | pericentriolar material 1                                                   | chr8p22-p21.3        | G2                                          | ---                                      | 1.19          | 1.27            | 1.06      | -1.03       | -1.14     | 1.19        | -1.06      | 1.10         | -1.04      | -1.33        | -1.40      | -1.32        |
| PCMT1      | protein-L-isoaspartate (D-amino acid) methyltransferase 1                   | chr6q24-q25          | cellular protein modification process       | ---                                      | 1.04          | 1.04            | -1.12     | -1.08       | 1.09      | 1.01        | 1.17       | 1.12         | 1.36       | 1.25         | 1.36       | 1.39         |
| PCMT1      | protein-L-isoaspartate (D-amino acid) methyltransferase 1                   | chr6q24-q25          | cellular protein modification process       | ---                                      | 1.02          | 1.12            | -1.13     | -1.02       | -1.10     | 1.04        | -1.30      | -1.10        | -1.23      | 1.08         | -1.15      | -1.12        |
| PCMTD1     | protein-L-isoaspartate (D-amino acid) methyltransferase domain containing 1 | chr8q11.23           | cellular protein modification process       | ---                                      | 1.03          | 1.06            | -1.03     | -1.00       | -1.07     | -1.07       | 1.01       | -1.08        | -1.18      | -1.14        | -1.07      | 1.06         |
| PCMTD1     | protein-L-isoaspartate (D-amino acid) methyltransferase domain containing 1 | chr8q11.23           | cellular protein modification process       | ---                                      | 1.10          | 1.10            | 1.17      | 1.02        | -1.04     | 1.07        | -1.28      | -1.08        | -1.76      | -1.12        | -1.28      | -1.19        |
| PCMTD1     | protein-L-isoaspartate (D-amino acid) methyltransferase domain containing 1 | chr8q11.23           | cellular protein modification process       | ---                                      | -1.12         | 1.21            | 1.57      | 1.69        | 1.43      | -1.00       | -1.08      | -1.11        | 1.31       | 1.13         | 1.10       | -1.10        |
| PCMTD2     | protein-L-isoaspartate (D-amino acid) methyltransferase domain containing 2 | chr20q13.33          | transcription, DNA-dependent                | G1_to_S_cell_cycle_Reactome // GenMap    | 1.29          | 1.28            | 1.04      | 1.09        | -1.09     | 1.06        | -1.16      | -1.18        | -2.35      | -1.93        | -1.57      | -1.58        |
| PCNA       | proliferating cell nuclear antigen                                          | chr20pter-p12        | DNA damage checkpoint                       | Cell_cycle_KEGG // GenMAPP // DNA_re     | 1.07          | 1.12            | -1.11     | -1.13       | -1.17     | 1.05        | -1.38      | -1.13        | -1.44      | -1.20        | -1.55      | -1.78        |
| PCNT       | pericentriolar material 1                                                   | chr21q22.3           | G2                                          | ---                                      | -1.12         | -1.10           | -1.04     | 1.03        | 1.10      | 1.05        | -1.09      | -1.04        | -1.61      | -1.85        | -1.58      | -1.38        |
| PCNT       | pericentriolar material 1                                                   | chr21q22.3           | G2                                          | ---                                      | -1.12         | -1.26           | 1.11      | 1.12        | 1.12      | 1.01        | -1.03      | -1.02        | -1.62      | -1.62        | -1.72      | -1.48        |
| PCNX       | pecanex homolog (Drosophila)                                                | chr14q24.2           | 0                                           | ---                                      | 1.19          | 1.15            | 1.21      | 1.35        | 1.09      | -1.09       | 1.40       | 1.16         | 1.01       | -1.11        | 1.27       | -1.09        |
| PCNX       | pecanex homolog (Drosophila)                                                | chr14q24.2           | 0                                           | ---                                      | 1.02          | 1.01            | 1.16      | 1.18        | 1.05      | 1.09        | -1.17      | -1.07        | -1.10      | 1.01         | -1.31      | -1.18        |
| PCNX       | pecanex homolog (Drosophila)                                                | chr14q24.2           | 0                                           | ---                                      | 1.87          | 1.07            | -1.79     | -1.65       | -1.22     | 1.12        | -2.10      | 1.25         | -1.61      | 1.05         | -1.77      | -2.21        |
| PCNX       | pecanex homolog (Drosophila)                                                | chr14q24.2           | 0                                           | ---                                      | -1.09         | -1.10           | 1.20      | 1.03        | -1.08     | -1.11       | -1.40      | -1.19        | -1.52      | -1.01        | -1.68      | -1.96        |
| PCNX       | pecanex homolog (Drosophila)                                                | chr14q24.2           | 0                                           | ---                                      | 1.26          | -1.06           | 1.01      | 1.42        | 1.40      | 2.04        | 4.34       | 1.68         | -1.57      | -1.64        | -2.09      | -1.61        |
| PCNXL2     | pecanex-like 2 (Drosophila)                                                 | chr1q42.2            | 0                                           | ---                                      | 1.12          | 1.04            | 1.01      | -1.01       | 1.04      | 1.03        | 1.07       | 1.11         | -1.28      | -1.24        | -2.00      | -1.49        |
| PCNXL2     | pecanex-like 2 (Drosophila)                                                 | chr1q42.2            | 0                                           | ---                                      | 1.69          | 1.74            | 1.01      | -1.02       | 1.31      | 1.40        | -1.05      | 1.09         | -2.13      | -2.08        | -1.78      | -1.31        |
| PCNXL4     | pecanex-like 4 (Drosophila)                                                 | chr14q23.1           | 0                                           | ---                                      | 1.19          | 1.07            | 1.22      | -1.01       | 1.04      | 1.09        | -1.26      | -1.03        | -1.71      | -1.46        | -1.61      | -1.72        |
| PCOLCE2    | procollagen C-endopeptidase                                                 | chr3q21-q24          | positive regulation of peptidase activity   | ---                                      | 1.08          | 1.08            | -1.12     | 1.09        | 1.05      | 1.11        | 1.13       | 1.13         | 1.26       | 1.52         | 1.06       | 1.13         |
| PCP4       | Purkinje cell protein 4                                                     | chr21q22.2           | central nervous system development          | ---                                      | 1.00          | 1.29            | 1.16      | 1.13        | -1.01     | 1.05        | 1.17       | 1.21         | -1.49      | -1.32        | -2.11      | -2.02        |
| PCP4L1     | Purkinje cell protein 4 like 1                                              | chr1q23.3            | 0                                           | ---                                      | -3.39         | -1.92           | -2.77     | -1.98       | -1.86     | 1.23        | 1.82       | 1.68         | 4.73       | 6.04         | 1.75       | 1.07         |
| PCSK1      | proprotein convertase subtilisin/kexin type 1                               | chr5q15-q21          | energy reserve metabolic process            | ---                                      | 1.24          | 1.23            | 1.07      | 1.13        | 1.12      | 1.08        | -1.01      | -1.02        | -1.75      | -1.53        | -1.07      | -1.15        |
| PCSK7      | proprotein convertase subtilisin/kexin type 7                               | chr11q23-q24         | proteolysis                                 | ---                                      | 1.26          | -1.09           | 1.08      | -1.09       | 1.13      | -1.14       | -1.21      | -1.23        | -1.32      | -1.34        | -2.12      | -1.94        |
| PCSK7      | proprotein convertase subtilisin/kexin type 7                               | chr11q23-q24         | proteolysis                                 | ---                                      | 1.17          | 1.27            | 1.05      | -1.31       | -1.08     | 1.01        | 1.14       | 1.19         | -1.27      | -1.23        | -2.42      | -4.03        |
| PCSK9      | proprotein convertase subtilisin/kexin type 9                               | chr1p32.3            | kidney development                          | ---                                      | 1.08          | 1.03            | 1.05      | -1.01       | 1.13      | 1.11        | 1.25       | -1.01        | 1.74       | 1.42         | 2.14       | 2.00         |
| PCYOX1     | prenylcysteine oxidase 1                                                    | chr2p13.3            | chloride transport                          | ---                                      | 1.00          | -1.03           | 1.01      | 1.09        | -1.02     | 1.05        | -1.37      | -1.11        | -1.33      | -1.13        | -1.10      | 1.13         |
| PCYOX1     | prenylcysteine oxidase 1                                                    | chr2p13.3            | chloride transport                          | ---                                      | -1.05         | -1.01           | 1.05      | -1.09       | -1.01     | 1.07        | -1.21      | -1.18        | -1.55      | -1.10        | 1.10       | 1.19         |
| PCYOX1L    | prenylcysteine oxidase 1 like 1                                             | chr5q32              | prenylcysteine catabolic process            | ---                                      | 1.00          | -1.04           | 1.01      | -1.08       | -1.01     | -1.13       | -1.23      | -1.14        | -1.25      | -1.21        | 1.26       | 1.47         |
| PCYT1A     | phosphate cytidylyltransferase 1                                            | chr3q29              | lipid metabolic process                     | Acetylcholine_Synthesis // GenMAPP       | 1.07          | -1.01           | 1.13      | 1.20        | -1.00     | 1.11        | -1.16      | -1.06        | 1.30       | 1.04         | 1.45       | 1.75         |
| PCYT1A     | phosphate cytidylyltransferase 1                                            | chr3q29              | lipid metabolic process                     | Acetylcholine_Synthesis // GenMAPP       | -1.15         | -1.08           | -1.02     | -1.00       | 1.03      | -1.00       | -1.02      | -1.03        | -1.22      | -1.14        | -1.21      | -1.18        |
| PCYT1B     | phosphate cytidylyltransferase 1B                                           | chrXp22.11           | ovarian follicle development                | ---                                      | -1.12         | -1.04           | -1.14     | 1.11        | 1.58      | 1.12        | 1.02       | 1.01         | -1.42      | -1.36        | -1.70      | -1.79        |
| PDCD10     | programmed cell death 10                                                    | chr3q26.1            | angiogenesis                                | ---                                      | 1.05          | 1.05            | -1.01     | 1.05        | 1.01      | 1.02        | -1.00      | -1.03        | 1.02       | 1.08         | 1.12       | 1.09         |
| PDCD11     | programmed cell death 11                                                    | chr10q24.33          | rRNA processing                             | ---                                      | -1.22         | -1.18           | 1.01      | -1.07       | 1.09      | 1.09        | -1.08      | 1.10         | -1.27      | -1.38        | -1.05      | 1.01         |
| PDCD2      | programmed cell death 2                                                     | chr6q27              | apoptotic process                           | ---                                      | 1.08          | 1.01            | 1.06      | -1.07       | 1.03      | -1.01       | -1.00      | -1.13        | -1.03      | 1.00         | 1.15       | 1.12         |
| PDCD2      | programmed cell death 2                                                     | chr6q27              | apoptotic process                           | ---                                      | 1.21          | 1.07            | -1.03     | 1.08        | -1.09     | 1.07        | -1.21      | -1.11        | -1.13      | 1.01         | 1.29       | 1.32         |
| PDCD2      | programmed cell death 2                                                     | chr6q27              | apoptotic process                           | ---                                      | -1.05         | -1.08           | -1.03     | 1.06        | 1.15      | 1.01        | 1.19       | 1.13         | -1.04      | -1.05        | -1.51      | -1.47        |
| PDCD2L     | programmed cell death 2-like 1                                              | chr19q13.11          | cell cycle                                  | ---                                      | -1.04         | -1.03           | -1.10     | -1.05       | 1.19      | -1.01       | 1.05       | -1.07        | 1.67       | 1.19         | 2.13       | 2.14         |
| PDCD4-AS1  | PDCD4 antisense RNA 1                                                       | chr10q25.2           | 0                                           | ---                                      | -1.03         | 1.05            | 1.09      | -1.06       | 1.01      | -1.13       | -1.28      | -1.20        | -3.13      | -2.21        | -4.51      | -4.73        |
| PDCD6IP    | programmed cell death 6 interacting protein                                 | chr3p22.3            | transport                                   | ---                                      | 1.39          | 1.29            | 1.07      | -1.02       | 1.09      | 1.01        | -1.01      | 1.02         | -1.62      | -1.47        | -1.44      | -1.65        |
| PDCD7      | programmed cell death 7                                                     | chr15q22.31          | apoptotic process                           | ---                                      | -1.02         | -1.01           | 1.07      | -1.07       | 1.03      | 1.11        | -1.01      | -1.00        | -1.14      | -1.04        | -1.21      | -1.21        |
| PDL1       | phosducin-like 2                                                            | chr4q12              | 0                                           | ---                                      | -2.73         | -2.64           | -1.61     | 1.23        | -10.73    | -3.39       | 1.25       | 4.19         | 2.28       | 1.33         | 2.46       | 8.34         |
| PDDC1      | Parkinson disease 7 domain containing 1                                     | chr11p15.5           | 0                                           | ---                                      | 1.12          | -1.10           | 1.15      | 1.34        | 1.32      | 1.16        | 1.29       | 1.13         | 1.15       | -1.24        | -1.34      | -1.39        |

| ID     | Gene Title                     | Chromosomal Location | 1st Gene Ontology Biological Process      | Pathway                                   | A2497 30 mins | A2497P' 30 mins | A2497 2 h | A2497P' 2 h | A2497 4 h | A2497P' 4 h | A2497 24 h | A2497P' 24 h | A2497 48 h | A2497P' 48 h | A2497 72 h | A2497P' 72 h |
|--------|--------------------------------|----------------------|-------------------------------------------|-------------------------------------------|---------------|-----------------|-----------|-------------|-----------|-------------|------------|--------------|------------|--------------|------------|--------------|
| PDE10A | phosphodiesterase 10A          | chr6q26              | cAMP catabolic process                    | ---                                       | -1.19         | 1.03            | 1.14      | 1.25        | 2.10      | 1.22        | 1.64       | 1.36         | 1.24       | 1.52         | 1.56       | 1.36         |
| PDE10A | phosphodiesterase 10A          | chr6q26              | cAMP catabolic process                    | ---                                       | 1.35          | 1.36            | -1.02     | -1.08       | -1.08     | -1.11       | 1.02       | 1.10         | -1.56      | -1.62        | -1.28      | -1.59        |
| PDE10A | phosphodiesterase 10A          | chr6q26              | cAMP catabolic process                    | ---                                       | -1.03         | 1.30            | 1.34      | 1.17        | 1.14      | -1.02       | 1.46       | 1.05         | 2.09       | 1.55         | 1.97       | 1.77         |
| PDE11A | phosphodiesterase 11A          | chr2q31.2            | cAMP catabolic process                    | ---                                       | 2.47          | 1.57            | 1.06      | -1.08       | -4.10     | -1.05       | -3.33      | -1.88        | 4.55       | 5.43         | 1.21       | -2.22        |
| PDE12  | phosphodiesterase 12           | chr3p14.3            | 0                                         | ---                                       | 1.02          | -1.04           | 1.01      | 1.08        | -1.15     | -1.04       | -1.21      | -1.09        | 1.11       | 1.18         | 1.11       | 1.05         |
| PDE1A  | phosphodiesterase 1A, caln     | chr2q32.1            | protein targeting to Golgi                | G_Protein_Signaling // GenMAPP            | 1.20          | 1.04            | 1.10      | 1.05        | -1.11     | 1.02        | -1.17      | -1.07        | -3.75      | -2.03        | -3.38      | -2.47        |
| PDE1A  | phosphodiesterase 1A, caln     | chr2q32.1            | protein targeting to Golgi                | G_Protein_Signaling // GenMAPP            | -1.04         | -1.09           | 1.10      | 1.16        | 1.15      | 1.04        | -1.05      | -1.05        | -2.66      | -1.94        | -2.93      | -2.46        |
| PDE1A  | phosphodiesterase 1A, caln     | chr2q32.1            | protein targeting to Golgi                | G_Protein_Signaling // GenMAPP            | -1.02         | -1.39           | -1.15     | -1.39       | 1.40      | 1.22        | -1.49      | 1.20         | -2.63      | -1.86        | -3.85      | -1.90        |
| PDE1A  | phosphodiesterase 1A, caln     | chr2q32.1            | protein targeting to Golgi                | G_Protein_Signaling // GenMAPP            | 1.03          | -1.08           | 1.25      | -1.01       | -1.15     | -1.30       | -1.47      | 1.03         | -10.31     | -4.14        | -8.09      | -6.53        |
| PDE1A  | phosphodiesterase 1A, caln     | chr2q32.1            | signal transduction                       | G_Protein_Signaling // GenMAPP            | -1.10         | 1.03            | 1.03      | 1.09        | -1.11     | 1.04        | 1.01       | 1.03         | -3.11      | -1.78        | -3.27      | -2.13        |
| PDE1A  | phosphodiesterase 1A, caln     | chr2q32.1            | protein targeting to Golgi                | G_Protein_Signaling // GenMAPP            | -1.19         | 1.02            | 1.10      | -1.12       | -1.02     | -1.09       | -1.04      | -1.44        | -1.84      | -1.92        | -2.50      | -1.97        |
| PDE1C  | phosphodiesterase 1C, caln     | chr7p14.3            | signal transduction                       | G_Protein_Signaling // GenMAPP            | -1.04         | -1.06           | 1.40      | 1.70        | -1.13     | 1.30        | -1.05      | -1.03        | -1.22      | 1.08         | -1.58      | -1.62        |
| PDE1C  | phosphodiesterase 1C, caln     | chr7p14.3            | signal transduction                       | G_Protein_Signaling // GenMAPP            | 1.16          | -1.53           | -1.50     | 1.13        | -1.92     | -1.06       | 1.93       | 1.07         | 2.25       | 1.94         | -1.62      | 1.18         |
| PDE2A  | phosphodiesterase 2A, cGM      | chr11q13.4           | negative regulation of transcription from | ---                                       | -1.18         | -1.31           | -1.07     | -1.01       | 1.13      | -1.02       | 1.08       | 1.01         | -1.73      | -1.58        | -1.08      | -1.03        |
| PDE3A  | phosphodiesterase 3A, cGM      | chr12p12             | oocyte maturation                         | ---                                       | 1.07          | 1.06            | -1.01     | 1.03        | -1.01     | -1.00       | 1.01       | -1.11        | -1.22      | -1.11        | -1.05      | -1.05        |
| PDE3A  | phosphodiesterase 3A, cGM      | chr12p12             | oocyte maturation                         | ---                                       | -1.01         | 1.08            | -1.02     | 1.11        | 1.09      | 1.23        | -1.16      | -1.15        | -1.39      | -1.20        | -1.14      | -1.20        |
| PDE3B  | phosphodiesterase 3B, cGM      | chr11p15.1           | angiogenesis                              | ---                                       | 1.10          | 1.00            | -1.08     | -1.11       | 1.06      | 1.16        | -1.19      | -1.10        | -3.75      | -2.61        | -6.26      | -4.80        |
| PDE3B  | phosphodiesterase 3B, cGM      | chr11p15.1           | angiogenesis                              | ---                                       | 1.36          | 1.16            | -1.02     | -1.05       | 1.71      | 1.92        | -1.20      | -1.09        | -2.43      | -1.85        | -2.01      | -2.19        |
| PDE3B  | phosphodiesterase 3B, cGM      | chr11p15.1           | angiogenesis                              | ---                                       | 1.02          | -1.02           | 1.12      | 1.17        | 1.17      | 1.01        | 1.08       | 1.02         | -2.74      | -2.47        | -2.35      | -2.28        |
| PDE4A  | phosphodiesterase 4A, cAM      | chr19p13.2           | cAMP catabolic process                    | G_Protein_Signaling // GenMAPP            | -1.02         | -1.08           | 1.04      | 1.04        | -1.05     | -1.02       | 1.04       | -1.01        | -1.40      | -1.07        | -1.14      | -1.06        |
| PDE4B  | phosphodiesterase 4B, cAM      | chr1p31              | neutrophil homeostasis                    | G_Protein_Signaling // GenMAPP // Smoot   | 1.05          | 1.01            | 1.01      | 1.19        | 1.07      | 1.12        | -1.24      | -1.09        | -1.82      | -1.62        | -1.03      | 1.01         |
| PDE4D  | phosphodiesterase 4D, cAM      | chr5q12              | regulation of heart rate                  | G_Protein_Signaling // GenMAPP // Smoot   | -1.08         | -1.03           | -1.04     | -1.05       | 1.06      | -1.00       | 1.25       | 1.04         | 1.01       | -1.04        | 1.37       | -1.02        |
| PDE4D  | phosphodiesterase 4D, cAM      | chr5q12              | regulation of heart rate                  | G_Protein_Signaling // GenMAPP // Smoot   | 1.16          | 1.18            | 1.00      | -1.05       | 1.03      | 1.02        | 1.02       | -1.12        | -1.25      | -1.30        | -1.19      | -1.46        |
| PDE5A  | phosphodiesterase 5A, cGM      | chr4q27              | response to hypoxia                       | ---                                       | 1.08          | 1.22            | -1.03     | -1.10       | 1.51      | -1.14       | -1.61      | -1.16        | 1.37       | 1.11         | 3.29       | 1.73         |
| PDE6C  | phosphodiesterase 6C, cGM      | chr10q24             | signal transduction                       | ---                                       | 1.99          | -2.13           | 1.59      | 1.57        | -5.20     | -2.90       | -5.13      | -3.70        | 1.14       | -1.59        | -5.32      | 2.77         |
| PDE7A  | phosphodiesterase 7A           | chr8q13              | cAMP catabolic process                    | G_Protein_Signaling // GenMAPP            | -1.10         | -1.03           | 1.07      | 1.08        | 1.32      | 1.50        | -1.33      | -1.08        | -3.18      | -2.12        | -2.65      | -2.23        |
| PDE7A  | phosphodiesterase 7A           | chr8q13              | cAMP catabolic process                    | G_Protein_Signaling // GenMAPP            | -1.38         | -1.48           | 1.25      | 1.28        | 1.40      | -1.07       | -1.32      | -1.16        | -1.85      | -2.18        | -1.22      | -1.21        |
| PDE7A  | phosphodiesterase 7A           | chr8q13              | cAMP catabolic process                    | G_Protein_Signaling // GenMAPP            | 1.05          | 1.11            | 1.08      | 1.07        | 1.14      | 1.01        | -1.47      | -1.30        | -2.64      | -2.32        | -1.77      | -1.71        |
| PDE7A  | phosphodiesterase 7A           | chr8q13              | cAMP catabolic process                    | G_Protein_Signaling // GenMAPP            | 1.10          | 1.02            | 1.03      | -1.05       | 1.07      | -1.03       | -1.00      | -1.07        | 1.18       | 1.36         | 1.54       | 1.50         |
| PDE7B  | phosphodiesterase 7B           | chr6q23-q24          | cAMP catabolic process                    | G_Protein_Signaling // GenMAPP            | 1.20          | 1.00            | 1.01      | 1.13        | 1.04      | 1.09        | -1.10      | -1.26        | -2.15      | -2.36        | -2.64      | -2.47        |
| PDE7B  | phosphodiesterase 7B           | chr6q23-q24          | cAMP catabolic process                    | G_Protein_Signaling // GenMAPP            | 1.41          | 1.22            | -1.07     | -1.27       | -1.51     | -1.02       | -1.18      | -1.35        | -2.62      | -1.98        | -2.05      | -2.90        |
| PDE8A  | phosphodiesterase 8A           | chr15q25.3           | phosphorelay signal transduction system   | G_Protein_Signaling // GenMAPP            | 1.04          | 1.05            | 1.10      | 1.17        | -1.01     | -1.03       | -1.08      | -1.02        | -1.59      | -1.29        | -1.57      | -1.55        |
| PDE8B  | phosphodiesterase 8B           | chr5q13.3            | phosphorelay signal transduction system   | G_Protein_Signaling // GenMAPP            | -1.10         | -1.09           | -1.01     | -1.12       | 1.07      | 1.07        | 1.06       | -1.04        | -1.68      | -1.35        | -1.77      | -1.57        |
| PDE8B  | phosphodiesterase 8B           | chr5q13.3            | phosphorelay signal transduction system   | G_Protein_Signaling // GenMAPP            | 1.00          | 1.00            | -1.03     | -1.06       | 1.19      | 1.15        | 1.04       | -1.10        | -2.18      | -1.49        | -1.81      | -1.65        |
| PDGFC  | platelet derived growth factor | chr4q32              | activation of transmembrane receptor pr   | ---                                       | 1.11          | 1.05            | 1.03      | 1.02        | 1.03      | 1.06        | -1.11      | -1.01        | -1.44      | -1.02        | -1.44      | -1.24        |
| PDGFD  | platelet derived growth factor | chr11q22.3           | multicellular organismal development      | ---                                       | 1.41          | 1.24            | -1.01     | -1.02       | 1.08      | 1.04        | -1.50      | -1.25        | -2.96      | -2.63        | -2.37      | -6.51        |
| PDGFR1 | platelet-derived growth factor | chr8p22-p21.3        | platelet-derived growth factor receptor-b | ---                                       | 1.14          | -1.06           | -1.06     | -1.04       | 1.12      | 1.09        | -1.11      | -1.14        | 1.14       | 1.31         | 1.56       | 1.77         |
| PDHA1  | pyruvate dehydrogenase (l)     | chrXp22.1            | carbohydrate metabolic process            | Acetylcholine_Synthesis // GenMAPP // G   | -1.06         | -1.03           | -1.02     | 1.07        | 1.02      | -1.08       | 1.12       | 1.07         | 1.38       | 1.17         | 1.14       | 1.24         |
| PDHA1  | pyruvate dehydrogenase (l)     | chrXp22.1            | carbohydrate metabolic process            | Acetylcholine_Synthesis // GenMAPP // G   | 1.07          | -1.07           | -1.04     | 1.06        | -1.01     | -1.11       | -1.04      | 1.00         | -1.11      | -1.05        | -1.51      | -1.46        |
| PDLA5  | protein disulfide isomerase    | chr3q21.1            | protein folding                           | ---                                       | 1.01          | 1.06            | 1.09      | -1.05       | 1.08      | 1.08        | -1.00      | -1.04        | 1.43       | 1.32         | 2.07       | 2.06         |
| PKD1   | pyruvate dehydrogenase k       | chr2q31.1            | carbohydrate metabolic process            | Krebs-TCA_Cycle // GenMAPP                | 1.02          | 1.04            | 1.12      | 1.17        | 1.14      | -1.01       | 1.08       | 1.02         | -2.00      | -1.17        | -1.30      | -1.12        |
| PKD2   | pyruvate dehydrogenase k       | chr17q21.33          | carbohydrate metabolic process            | Krebs-TCA_Cycle // GenMAPP                | -1.16         | -1.07           | 1.17      | 1.01        | 1.11      | -1.16       | -1.09      | -1.19        | -2.11      | -3.04        | -2.16      | -3.66        |
| PKD2   | pyruvate dehydrogenase k       | chr17q21.33          | carbohydrate metabolic process            | Krebs-TCA_Cycle // GenMAPP                | -1.17         | -1.20           | -1.03     | 1.23        | -1.16     | -1.08       | 1.31       | 1.23         | -2.06      | -1.75        | -1.82      | -1.38        |
| PKD3   | pyruvate dehydrogenase k       | chrXp22.11           | carbohydrate metabolic process            | Krebs-TCA_Cycle // GenMAPP                | -1.08         | -1.08           | 1.02      | 1.12        | 1.06      | 1.00        | 1.04       | 1.04         | 1.04       | 1.16         | -1.24      | 1.15         |
| PKD3   | pyruvate dehydrogenase k       | chrXp22.11           | carbohydrate metabolic process            | Krebs-TCA_Cycle // GenMAPP                | -1.18         | -1.08           | 1.14      | 1.12        | -1.34     | -1.12       | 1.24       | 1.07         | 1.52       | 2.10         | -1.26      | 1.34         |
| PKD3   | pyruvate dehydrogenase k       | chrXp22.11           | carbohydrate metabolic process            | Krebs-TCA_Cycle // GenMAPP                | -1.15         | -1.25           | 1.10      | 1.18        | 1.07      | 1.11        | 1.24       | 1.08         | 1.73       | 2.05         | 1.48       | 1.80         |
| PKD3   | pyruvate dehydrogenase k       | chrXp22.11           | carbohydrate metabolic process            | Krebs-TCA_Cycle // GenMAPP                | 1.08          | 1.06            | 1.16      | 1.06        | -1.12     | -1.13       | -1.08      | -1.20        | 1.44       | 1.68         | 1.55       | 1.45         |
| PKD4   | pyruvate dehydrogenase k       | chr7q21.3            | carbohydrate metabolic process            | Krebs-TCA_Cycle // GenMAPP                | -1.05         | -1.73           | 2.65      | 1.33        | -1.66     | -2.08       | -1.11      | -1.37        | 1.25       | -1.12        | -1.35      | -1.56        |
| PKD4   | pyruvate dehydrogenase k       | chr7q21.3            | carbohydrate metabolic process            | Krebs-TCA_Cycle // GenMAPP                | 1.07          | 1.05            | 1.13      | 1.12        | -1.01     | 1.06        | -1.14      | -1.18        | -2.58      | -1.92        | -3.12      | -3.59        |
| PKD4   | pyruvate dehydrogenase k       | chr7q21.3            | carbohydrate metabolic process            | Krebs-TCA_Cycle // GenMAPP                | -1.30         | 1.59            | 1.12      | -1.61       | 1.45      | -1.18       | 1.23       | 1.30         | -2.85      | -4.26        | -2.91      | -2.53        |
| PDLIM2 | PDZ and LIM domain 2 (m        | chr8p21.3            | 0                                         | ---                                       | -1.04         | -1.21           | -1.05     | -1.00       | -1.03     | -1.08       | 1.10       | 1.07         | 1.19       | 1.19         | 1.24       | 1.65         |
| PDLIM3 | PDZ and LIM domain 3           | chr4q35              | actin filament organization               | ---                                       | 1.46          | 2.00            | -1.43     | -1.04       | 1.54      | 1.01        | 1.57       | 1.48         | 1.23       | -1.58        | 2.23       | 2.29         |
| PDLIM3 | PDZ and LIM domain 3           | chr4q35              | actin filament organization               | ---                                       | 1.52          | 1.38            | -1.07     | 1.16        | -1.13     | 1.06        | 1.07       | -1.57        | 1.28       | 1.14         | 1.20       | 1.17         |
| PDLIM5 | PDZ and LIM domain 5           | chr4q22              | regulation of synapse assembly            | ---                                       | 1.02          | 1.08            | 1.04      | -1.22       | 1.23      | 1.16        | 2.07       | 1.55         | 2.31       | 2.12         | 4.66       | 3.10         |
| PDLIM5 | PDZ and LIM domain 5           | chr4q22              | regulation of synapse assembly            | ---                                       | -1.01         | -1.12           | 1.10      | -1.05       | 1.27      | 1.24        | 2.24       | 1.40         | 2.54       | 2.18         | 4.17       | 2.97         |
| PDLIM5 | PDZ and LIM domain 5           | chr4q22              | regulation of synapse assembly            | ---                                       | -1.01         | -1.01           | -1.00     | -1.56       | 1.05      | 1.02        | 1.67       | 1.08         | 1.73       | 1.30         | 2.95       | 2.44         |
| PDLIM5 | PDZ and LIM domain 5           | chr4q22              | regulation of synapse assembly            | ---                                       | -1.07         | 1.07            | 1.14      | -1.06       | 1.24      | 1.26        | -1.00      | -1.09        | 1.30       | 1.11         | 1.70       | 1.54         |
| PDLIM7 | PDZ and LIM domain 7 (e        | chr5q35.3            | ossification                              | ---                                       | 1.03          | 1.13            | -1.03     | -1.02       | 1.00      | -1.14       | 1.32       | 1.15         | 2.43       | 1.49         | 2.00       | 1.66         |
| PDLIM7 | PDZ and LIM domain 7 (e        | chr5q35.3            | ossification                              | ---                                       | -1.11         | -1.06           | -1.09     | -1.20       | 1.16      | -1.04       | 1.13       | 1.08         | 1.94       | 1.62         | 1.67       | 1.52         |
| PDLIM7 | PDZ and LIM domain 7 (e        | chr5q35.3            | ossification                              | ---                                       | -1.17         | -1.16           | 1.08      | 1.32        | 1.13      | -1.07       | 1.31       | 1.17         | 2.29       | 1.47         | 1.75       | 1.46         |
| PDLIM7 | PDZ and LIM domain 7 (e        | chr5q35.3            | ossification                              | ---                                       | 1.08          | -1.05           | 1.08      | 1.41        | 1.11      | -1.05       | 1.48       | 1.42         | 2.62       | 1.63         | 1.93       | 1.84         |
| PDLIM7 | PDZ and LIM domain 7 (e        | chr5q35.3            | ossification                              | ---                                       | -1.14         | -1.19           | 1.07      | -1.19       | 1.32      | 1.11        | 1.26       | 1.00         | 1.71       | 1.48         | 1.85       | 1.97         |
| PDP1   | pyruvate dehydrogenase pho     | chr8q22.1            | pyruvate metabolic process                | Krebs-TCA_Cycle // GenMAPP                | 1.41          | 1.13            | -1.17     | -1.17       | 1.03      | 1.42        | 1.04       | -1.15        | 1.57       | 1.69         | 1.45       | 1.10         |
| PDP2   | pyruvate dehydrogenase pho     | chr16q22.1           | pyruvate metabolic process                | Krebs-TCA_Cycle // GenMAPP                | -1.05         | 1.06            | -1.03     | -1.06       | 1.02      | -1.02       | 1.12       | -1.07        | 1.01       | -1.07        | 1.56       | 1.45         |
| PDP2   | pyruvate dehydrogenase pho     | chr16q22.1           | pyruvate metabolic process                | Krebs-TCA_Cycle // GenMAPP                | 1.45          | 1.21            | 1.66      | 1.53        | -1.08     | 1.26        | 1.52       | 1.16         | 1.16       | 1.47         | 1.16       | 1.14         |
| PDPK1  | 3-phosphoinositide depend      | chr16p13.3           | type B pancreatic cell development        | Integrin-mediated_cell_adhesion_KEGG // C | 1.18          | 1.13            | 1.15      | -1.18       | 1.11      | 1.20        | 1.15       | 1.05         | -2.00      | -1.97        | -1.45      | -1.79        |

| ID          | Gene Title                                          | Chromosomal Location      | 1st Gene Ontology Biological Process                                 | Pathway                                     | A2497 30 mins | A2497P' 30 mins | A2497 2 h | A2497P' 2 h | A2497 4 h | A2497P' 4 h | A2497 24 h | A2497P' 24 h | A2497 48 h | A2497P' 48 h | A2497 72 h | A2497P' 72 h |
|-------------|-----------------------------------------------------|---------------------------|----------------------------------------------------------------------|---------------------------------------------|---------------|-----------------|-----------|-------------|-----------|-------------|------------|--------------|------------|--------------|------------|--------------|
| PDPK1       | 3-phosphoinositide dependent kinase-1               | chr16p13.3                | type B pancreatic cell development                                   | Integrin-mediated_cell_adhesion_KEGG // C   | 1.23          | 1.22            | 1.04      | -1.13       | -1.07     | -1.01       | -1.33      | -1.06        | -1.70      | -1.64        | -1.79      | -1.92        |
| PDRG1       | p53 and DNA-damage regulated G2/M checkpoint kinase | chr20q11.21               | protein folding                                                      | ---                                         | -1.23         | -1.16           | 1.19      | 1.10        | 1.08      | 1.02        | -1.01      | 1.11         | 1.79       | 1.17         | 1.64       | 1.76         |
| PDSSA       | PDS5, regulator of cohesin                          | chr4p14                   | mitotic cell cycle                                                   | ---                                         | 1.02          | -1.02           | -1.02     | 1.06        | 1.18      | -1.02       | 1.14       | 1.02         | 1.37       | 1.25         | 1.67       | 1.44         |
| PDSSA       | PDS5, regulator of cohesin                          | chr4p14                   | mitotic cell cycle                                                   | ---                                         | 1.19          | 1.05            | -1.11     | 1.19        | -1.13     | -1.03       | -1.30      | -1.12        | 1.14       | 1.28         | 1.44       | 1.20         |
| PDSSA       | PDS5, regulator of cohesin                          | chr4p14                   | mitotic cell cycle                                                   | ---                                         | 1.13          | 1.18            | 1.13      | 1.09        | 1.05      | 1.09        | -1.19      | -1.25        | -1.43      | -1.48        | -1.19      | -1.36        |
| PDS5B       | PDS5, regulator of cohesin                          | chr13q12.3                | mitotic cell cycle                                                   | ---                                         | 1.18          | 1.08            | 1.03      | 1.00        | -1.09     | -1.04       | -1.32      | 1.01         | -1.43      | -1.05        | -1.10      | -1.14        |
| PDSS1       | prenyl (decaprenyl) diphosphate synthase            | chr10p12.1                | ubiquinone biosynthetic process                                      | ---                                         | 1.10          | 1.15            | 1.00      | 1.05        | 1.05      | -1.04       | -1.12      | -1.02        | -1.39      | -1.95        | -1.20      | -1.44        |
| PDSS1       | prenyl (decaprenyl) diphosphate synthase            | chr10p12.1                | ubiquinone biosynthetic process                                      | ---                                         | 1.09          | 1.08            | 1.38      | 1.01        | 1.22      | 1.04        | -1.16      | -1.42        | 2.28       | 1.99         | 1.39       | 1.43         |
| PDSS2       | prenyl (decaprenyl) diphosphate synthase            | chr6q21                   | ubiquinone biosynthetic process                                      | ---                                         | -1.12         | -1.09           | 1.04      | 1.09        | 1.07      | -1.01       | 1.18       | 1.13         | 1.10       | 1.11         | -1.26      | -1.13        |
| PDSS2       | prenyl (decaprenyl) diphosphate synthase            | chr6q21                   | ubiquinone biosynthetic process                                      | ---                                         | 1.10          | 1.06            | -1.10     | 1.16        | -1.10     | -1.00       | 1.04       | -1.09        | 1.16       | 1.24         | 1.53       | 1.68         |
| PDXK        | pyridoxal (pyridoxine, vitamin B6) transaminase     | chr21q22.3                | vitamin metabolic process                                            | ---                                         | -1.08         | -1.00           | 1.06      | 1.03        | 1.07      | 1.03        | -1.03      | 1.06         | -1.29      | -1.09        | 1.11       | 1.10         |
| PDXK        | pyridoxal (pyridoxine, vitamin B6) transaminase     | chr21q22.3                | vitamin metabolic process                                            | ---                                         | -1.08         | -1.13           | 1.01      | 1.12        | 1.04      | 1.01        | 1.47       | 1.28         | 2.09       | 1.76         | 1.71       | 1.83         |
| PDXK        | pyridoxal (pyridoxine, vitamin B6) transaminase     | chr21q22.3                | vitamin metabolic process                                            | ---                                         | -1.15         | -1.06           | -1.16     | -1.13       | -1.07     | -1.08       | 1.18       | 1.18         | 1.89       | 1.24         | 1.52       | 1.69         |
| PDXP // SH3 | pyridoxal (pyridoxine, vitamin B6) transaminase     | chr22q12.3 /// chr22q12.3 | protein dephosphorylation                                            | ---                                         | 1.06          | -1.02           | 1.03      | 1.13        | -1.02     | -1.05       | 1.08       | 1.10         | 1.86       | 1.66         | 1.27       | 1.58         |
| PDZD11      | PDZ domain containing 11                            | chrXq13.1                 | 0                                                                    | ---                                         | -1.04         | -1.02           | 1.01      | 1.08        | -1.01     | 1.00        | -1.06      | -1.05        | 1.02       | 1.06         | -1.21      | -1.11        |
| PDZD2       | PDZ domain containing 2                             | chr5p13.3                 | cell adhesion                                                        | ---                                         | -1.06         | 1.27            | 1.12      | -1.15       | 1.12      | 1.39        | 1.10       | 1.02         | 1.39       | 1.04         | 2.00       | 1.58         |
| PDZD8       | PDZ domain containing 8                             | chr10q26.12               | cytoskeleton organization                                            | ---                                         | -1.01         | 1.11            | 1.09      | -1.09       | 1.19      | 1.07        | 1.19       | 1.15         | 1.09       | 1.28         | 1.58       | 1.79         |
| PDZD9       | PDZ domain containing 9                             | chr16p12.2                | 0                                                                    | ---                                         | -1.56         | -1.22           | -1.49     | -1.08       | 1.90      | 1.25        | -1.20      | -2.60        | 1.12       | 1.51         | 1.01       | 1.01         |
| PDZK1       | PDZ domain containing 1                             | chr1q21                   | transport                                                            | ---                                         | -1.19         | -1.29           | -1.30     | 1.18        | -1.09     | -1.08       | -1.75      | -1.01        | 1.07       | 1.14         | 1.41       | 1.08         |
| PDZK1IP1    | PDZK1 interacting protein                           | chr1p33                   | 0                                                                    | ---                                         | -1.46         | -1.24           | -1.23     | -1.20       | -1.24     | -1.37       | -1.21      | -1.33        | 1.74       | 1.49         | 2.30       | 2.41         |
| PDZK1IP1    | PDZK1 interacting protein                           | chr1p33                   | 0                                                                    | ---                                         | -1.04         | -1.03           | 1.21      | 1.04        | 1.13      | 1.37        | 1.10       | 1.06         | 2.25       | 2.45         | 2.71       | 3.06         |
| PDZRN4      | PDZ domain containing ring finger protein           | chr12q12                  | protein ubiquitination                                               | ---                                         | 9.77          | 5.67            | -1.70     | -1.31       | 2.30      | 4.27        | -1.83      | 1.09         | 21.37      | 22.84        | -3.87      | -1.10        |
| PEA15       | phosphoprotein enriched in platelets                | chr1q21.1                 | transport                                                            | Calcium_regulation_in_cardiac_cells // Gen  | 1.07          | 1.06            | -1.10     | 1.01        | -1.02     | 1.07        | 1.22       | 1.13         | 1.62       | 1.41         | 1.51       | 1.62         |
| PEA15       | phosphoprotein enriched in platelets                | chr1q21.1                 | transport                                                            | Calcium_regulation_in_cardiac_cells // Gen  | -1.28         | -1.25           | -1.23     | -1.02       | 1.00      | -1.11       | 1.23       | 1.17         | 1.73       | 1.49         | 1.84       | 1.80         |
| PEAK1       | NKF3 kinase family member                           | chr15q24.3                | protein phosphorylation                                              | ---                                         | 1.02          | 1.01            | -1.05     | -1.13       | 1.07      | 1.07        | -1.03      | 1.05         | -1.17      | -1.28        | -1.00      | 1.00         |
| PEAK1       | NKF3 kinase family member                           | chr15q24.3                | protein phosphorylation                                              | ---                                         | 1.08          | 1.13            | 1.08      | 1.23        | 1.17      | -1.23       | -1.09      | 1.25         | 3.80       | 3.07         | 1.73       | 2.29         |
| PEBP1       | phosphatidylethanolamine binding protein            | chr12q24.23               | MAPK cascade                                                         | ---                                         | -1.08         | -1.04           | -1.00     | -1.04       | 1.05      | -1.01       | 1.16       | 1.02         | 1.06       | -1.04        | -1.25      | -1.19        |
| PEBP1       | phosphatidylethanolamine binding protein            | chr12q24.23               | MAPK cascade                                                         | ---                                         | 1.01          | 1.06            | -1.03     | 1.04        | -1.06     | -1.05       | 1.09       | 1.03         | 1.15       | 1.08         | -1.23      | -1.22        |
| PEBP1       | phosphatidylethanolamine binding protein            | chr12q24.23               | MAPK cascade                                                         | ---                                         | -1.06         | 1.07            | -1.06     | -1.01       | -1.09     | -1.09       | 1.02       | 1.00         | 1.17       | 1.02         | -1.16      | -1.14        |
| PECAM1      | platelet/endothelial cell adhesion molecule         | chr17q23.3                | platelet degranulation                                               | ---                                         | 2.09          | 1.92            | 1.04      | 1.04        | 2.28      | 1.43        | 1.22       | 1.04         | 1.30       | 1.17         | 1.80       | 1.84         |
| PECAM1      | platelet/endothelial cell adhesion molecule         | chr17q23.3                | platelet degranulation                                               | ---                                         | -1.10         | -1.22           | -1.02     | -1.45       | 1.41      | 1.11        | -1.59      | -1.02        | 1.38       | 1.36         | 2.32       | 2.04         |
| PECAM1      | platelet/endothelial cell adhesion molecule         | chr17q23.3                | platelet degranulation                                               | ---                                         | -1.43         | -1.08           | 1.49      | 1.14        | -1.05     | 1.19        | -1.66      | -1.01        | 1.24       | 1.13         | 4.55       | 3.07         |
| PECR        | peroxisomal trans-2-enoyl-CoA hydratase             | chr2q35                   | lipid metabolic process                                              | Mitochondrial_fatty_acid_betaoxidation // G | -1.09         | -1.14           | 1.05      | 1.14        | -1.10     | 1.08        | -1.05      | -1.37        | -1.19      | -1.55        | -1.46      | -1.46        |
| PEF1        | penta-EF-hand domain containing protein             | chr1p34                   | response to calcium ion                                              | ---                                         | 1.04          | 1.02            | -1.02     | 1.01        | -1.05     | -1.05       | 1.09       | 1.01         | 1.44       | 1.23         | 1.45       | 1.46         |
| PEG10       | paternally expressed 10                             | chr7q21                   | placenta development                                                 | ---                                         | 1.05          | 1.04            | 1.02      | 1.12        | 1.01      | 1.08        | -1.13      | -1.05        | -1.05      | 1.17         | -1.42      | -1.33        |
| PEG10       | paternally expressed 10                             | chr7q21                   | placenta development                                                 | ---                                         | 1.01          | 1.04            | 1.11      | -1.15       | 1.12      | -1.05       | -1.33      | -1.42        | -2.01      | -1.34        | -1.88      | -1.56        |
| PELO        | pelota homolog (Drosophila)                         | chr5q11.2                 | activation of MAPK activity                                          | Integrin-mediated_cell_adhesion_KEGG // C   | 1.03          | 1.05            | 1.17      | 1.04        | -1.01     | 1.25        | 1.25       | 1.37         | 1.74       | 1.22         | 1.12       | 1.27         |
| PELO        | pelota homolog (Drosophila)                         | chr5q11.2                 | activation of MAPK activity                                          | Integrin-mediated_cell_adhesion_KEGG // C   | -1.08         | -1.12           | 1.05      | 1.05        | 1.07      | -1.05       | 1.01       | 1.01         | 1.86       | 1.71         | 1.89       | 1.97         |
| PELO        | pelota homolog (Drosophila)                         | chr5q11.2                 | activation of MAPK activity                                          | Integrin-mediated_cell_adhesion_KEGG // C   | -1.10         | 1.11            | 1.46      | 1.32        | -1.84     | -1.55       | 1.03       | -1.17        | 1.04       | 1.49         | 1.07       | 1.15         |
| PENT        | phosphatidylethanolamine transferase                | chr17p11.2                | lipid metabolic process                                              | Acetylcholine_Synthesis // GenMAPP          | 1.02          | -1.07           | 1.04      | 1.24        | 1.10      | -1.11       | 1.30       | 1.44         | 1.72       | 1.27         | 1.08       | 1.14         |
| PENK        | proenkephalin                                       | chr8q23-q24               | behavioral fear response                                             | ---                                         | -1.27         | -1.05           | 1.95      | 2.02        | -1.56     | 1.12        | 1.11       | -1.15        | 1.24       | -1.98        | 1.45       | 2.85         |
| PEPD        | peptidase D                                         | chr19q13.11               | proteolysis                                                          | ---                                         | -1.07         | -1.13           | 1.10      | 1.18        | 1.10      | 1.09        | 1.06       | -1.05        | 1.09       | 1.24         | -1.14      | -1.11        |
| PER1        | period circadian clock 1                            | chr17p13.1                | negative regulation of transcription from RNA polymerase II promoter | Circadian_Exercise // GenMAPP               | -3.20         | -1.20           | 1.06      | -1.13       | -1.50     | -1.35       | 7.91       | 7.13         | 45.67      | 27.14        | 7.73       | 4.00         |
| PER1        | period circadian clock 1                            | chr17p13.1                | negative regulation of transcription from RNA polymerase II promoter | Circadian_Exercise // GenMAPP               | -1.07         | 1.03            | 1.14      | 1.20        | -1.13     | -1.06       | 1.31       | 1.18         | 1.68       | 1.61         | 1.83       | 1.61         |
| PER1        | period circadian clock 1                            | chr17p13.1                | negative regulation of transcription from RNA polymerase II promoter | Circadian_Exercise // GenMAPP               | 1.28          | -1.32           | 1.42      | 1.69        | 1.12      | -1.09       | 1.22       | 1.24         | 2.29       | 2.06         | 2.63       | 2.45         |
| PER1        | period circadian clock 1                            | chr17p13.1                | negative regulation of transcription from RNA polymerase II promoter | Circadian_Exercise // GenMAPP               | 1.21          | 1.10            | -1.20     | -1.13       | 1.07      | 1.08        | 1.06       | -1.05        | 2.50       | 2.55         | 2.28       | 2.06         |
| PER2        | period circadian clock 2                            | chr2q37.3                 | negative regulation of transcription from RNA polymerase II promoter | Circadian_Exercise // GenMAPP               | 1.12          | 1.10            | -1.04     | -1.09       | -1.04     | 1.07        | -1.08      | -1.05        | -1.60      | -1.14        | -1.31      | -1.48        |
| PER3        | period circadian clock 3                            | chr1p36.23                | negative regulation of transcription from RNA polymerase II promoter | ---                                         | 1.24          | 1.27            | -1.05     | -1.15       | -1.31     | -1.00       | -1.42      | -1.07        | -2.71      | -2.28        | -2.18      | -2.35        |
| PER3        | period circadian clock 3                            | chr1p36.23                | negative regulation of transcription from RNA polymerase II promoter | ---                                         | -1.11         | 1.07            | 1.52      | 1.40        | -1.61     | -1.23       | 1.55       | 1.20         | 1.12       | 1.40         | 1.21       | 1.18         |
| PERP        | PERP, TP53 apoptosis effector                       | chr6q24                   | desmosome organization                                               | ---                                         | 1.05          | 1.06            | -1.09     | 1.03        | -1.16     | -1.02       | -1.08      | -1.12        | 1.08       | 1.04         | -1.10      | -1.16        |
| PERP        | PERP, TP53 apoptosis effector                       | chr6q24                   | desmosome organization                                               | ---                                         | -1.08         | -1.13           | 1.03      | -1.01       | -1.15     | -1.06       | -1.31      | -1.03        | -1.34      | -1.19        | -1.70      | -1.51        |
| PEX1        | peroxisomal biogenesis factor                       | chr7q21.2                 | DNA repair                                                           | ---                                         | 1.13          | 1.04            | 1.17      | 1.11        | -1.56     | 1.23        | -1.23      | -1.05        | -1.85      | -1.62        | -1.37      | -1.37        |
| PEX10       | peroxisomal biogenesis factor                       | chr1p36.32                | peroxisome organization                                              | ---                                         | 1.24          | 1.01            | -1.15     | 1.09        | -1.07     | 1.09        | 1.13       | 1.16         | -1.10      | 1.15         | -1.56      | -1.22        |
| PEX11A      | peroxisomal biogenesis factor                       | chr15q26.1                | peroxisome organization                                              | ---                                         | 1.08          | 1.06            | -1.09     | -1.14       | -1.02     | 1.21        | -1.07      | -1.11        | -1.55      | -1.24        | -1.34      | -1.31        |
| PEX11G      | peroxisomal biogenesis factor                       | chr19p13.2                | peroxisome fission                                                   | ---                                         | 1.14          | -1.18           | -1.16     | 1.22        | 1.08      | -1.32       | 1.31       | 1.23         | 1.14       | -1.19        | -1.31      | -1.21        |
| PEX12       | peroxisomal biogenesis factor                       | chr17q12                  | protein targeting to peroxisome                                      | ---                                         | 1.02          | 1.12            | -1.10     | -1.10       | 1.09      | 1.01        | -1.24      | -1.24        | -1.27      | -1.43        | 1.19       | 1.14         |
| PEX13       | peroxisomal biogenesis factor                       | chr2p16.1                 | fatty acid alpha-oxidation                                           | ---                                         | 1.01          | -1.04           | 1.06      | 1.06        | -1.11     | 1.16        | -1.08      | 1.06         | -1.09      | 1.07         | 1.18       | 1.06         |
| PEX13       | peroxisomal biogenesis factor                       | chr2p16.1                 | fatty acid alpha-oxidation                                           | ---                                         | 1.10          | 1.07            | 1.20      | 1.13        | -1.05     | 1.05        | -1.02      | 1.04         | -1.15      | -1.07        | 1.34       | 1.18         |
| PEX13       | peroxisomal biogenesis factor                       | chr2p16.1                 | fatty acid alpha-oxidation                                           | ---                                         | 1.03          | 1.18            | 1.12      | 1.28        | 1.15      | -1.01       | 1.00       | -1.06        | 1.27       | 1.35         | 1.40       | 1.15         |
| PEX13       | peroxisomal biogenesis factor                       | chr2p16.1                 | fatty acid alpha-oxidation                                           | ---                                         | 1.18          | 1.03            | 1.16      | 1.04        | -1.32     | -1.18       | -1.06      | 1.05         | 1.45       | 1.26         | 1.49       | 1.55         |
| PEX13       | peroxisomal biogenesis factor                       | chr2p16.1                 | fatty acid alpha-oxidation                                           | ---                                         | 1.05          | -1.02           | -1.37     | -1.24       | -1.25     | -1.23       | -1.15      | -1.08        | -1.15      | 1.06         | 1.01       | 1.09         |
| PEX14       | peroxisomal biogenesis factor                       | chr1p36.22                | protein complex assembly                                             | ---                                         | -1.12         | -1.02           | -1.24     | -1.06       | 1.12      | 1.05        | -1.03      | -1.03        | -2.69      | -1.98        | -2.87      | -3.38        |
| PEX14       | peroxisomal biogenesis factor                       | chr1p36.22                | protein complex assembly                                             | ---                                         | 1.05          | -1.17           | 1.15      | 1.38        | -1.01     | -1.09       | 1.52       | 1.17         | 1.40       | 1.09         | 1.30       | 1.35         |
| PEX19       | peroxisomal biogenesis factor                       | chr1q23.2                 | protein targeting to peroxisome                                      | ---                                         | 1.28          | 1.11            | 1.02      | 1.04        | 1.02      | 1.08        | 1.09       | 1.05         | -1.28      | -1.19        | -1.20      | -1.26        |
| PEX3        | peroxisomal biogenesis factor                       | chr6q24.2                 | peroxisome organization                                              | ---                                         | 1.15          | 1.10            | 1.12      | -1.08       | -1.04     | 1.06        | -1.29      | -1.02        | -1.44      | -1.01        | -1.47      | -1.29        |
| PEX3        | peroxisomal biogenesis factor                       | chr6q24.2                 | peroxisome organization                                              | ---                                         | 1.04          | 1.14            | 1.03      | 1.07        | 1.07      | -1.18       | 1.31       | 1.17         | 1.22       | 1.49         | 1.14       | 1.13         |

| ID      | Gene Title                                             | Chromosomal Location | 1st Gene Ontology Biological Process                                 | Pathway                                 | A2497 30 mins | A2497P' 30 mins | A2497 2 h | A2497P' 2 h | A2497 4 h | A2497P' 4 h | A2497 24 h | A2497P' 24 h | A2497 48 h | A2497P' 48 h | A2497 72 h | A2497P' 72 h |
|---------|--------------------------------------------------------|----------------------|----------------------------------------------------------------------|-----------------------------------------|---------------|-----------------|-----------|-------------|-----------|-------------|------------|--------------|------------|--------------|------------|--------------|
| PEX7    | peroxisomal biogenesis factor 7                        | chr6q23.3            | neuron migration                                                     | ---                                     | 1.14          | 1.23            | -1.04     | -1.06       | -1.12     | -1.03       | -1.31      | -1.10        | -1.13      | -1.06        | -1.47      | 1.06         |
| PEX7    | peroxisomal biogenesis factor 7                        | chr6q23.3            | neuron migration                                                     | ---                                     | 1.19          | 1.22            | -1.08     | -1.11       | -1.11     | 1.03        | -1.05      | -1.04        | -1.28      | -1.04        | -1.34      | -1.41        |
| PFAS    | phosphoribosylformylglycine synthetase                 | chr17p13.1           | purine nucleobase metabolic process                                  | ---                                     | -1.11         | 1.02            | -1.08     | -1.13       | -1.13     | -1.06       | -1.08      | 1.07         | -1.68      | -1.37        | -1.77      | -1.80        |
| PFDN2   | prefoldin subunit 2                                    | chr1q23.3            | protein folding                                                      | ---                                     | -1.01         | 1.02            | 1.02      | -1.17       | 1.07      | -1.05       | 1.06       | -1.06        | 1.77       | 1.49         | 1.79       | 1.47         |
| PFDN4   | prefoldin subunit 4                                    | chr20q13.2           | protein folding                                                      | ---                                     | 1.18          | 1.09            | -1.16     | -1.23       | -1.13     | -1.02       | 1.04       | 1.19         | -1.46      | -1.62        | -1.63      | -2.14        |
| PFDN4   | prefoldin subunit 4                                    | chr20q13.2           | protein folding                                                      | ---                                     | -1.13         | -1.13           | -1.01     | -1.01       | -1.13     | -1.15       | 1.01       | 1.39         | 1.21       | -1.02        | 1.22       | 1.01         |
| PFDN6   | prefoldin subunit 6                                    | chr6p21.3            | protein folding                                                      | ---                                     | -1.05         | -1.13           | -1.05     | -1.04       | -1.02     | -1.12       | -1.09      | 1.18         | -1.32      | -1.11        | -2.06      | -2.22        |
| PFDN6   | prefoldin subunit 6                                    | chr6p21.3            | protein folding                                                      | ---                                     | -1.24         | -1.25           | -1.08     | -1.22       | -1.00     | 1.16        | -1.36      | -1.10        | -1.29      | 1.12         | -2.20      | -1.65        |
| PFKFB1  | 6-phosphofructo-2-kinase/fructose 2,6-bisphosphatase 1 | chrXp11.21           | carbohydrate metabolic process                                       | ---                                     | 2.07          | -2.20           | -1.68     | -2.28       | 1.17      | 6.16        | 3.12       | 1.75         | 1.20       | -1.09        | 2.77       | 1.99         |
| PFKFB2  | 6-phosphofructo-2-kinase/fructose 2,6-bisphosphatase 2 | chr1q31              | carbohydrate metabolic process                                       | ---                                     | 1.37          | 1.11            | 1.05      | 1.69        | -1.06     | 1.04        | -1.27      | 1.54         | 1.08       | -1.06        | 2.15       | 1.64         |
| PFKFB3  | 6-phosphofructo-2-kinase/fructose 2,6-bisphosphatase 3 | chr10p15.1           | carbohydrate metabolic process                                       | ---                                     | -1.10         | -1.16           | -1.04     | -1.08       | -1.08     | -1.05       | 1.02       | -1.04        | 1.06       | 1.15         | 1.21       | 1.25         |
| PFKFB4  | 6-phosphofructo-2-kinase/fructose 2,6-bisphosphatase 4 | chr3p22-p21          | carbohydrate metabolic process                                       | ---                                     | -1.07         | -1.13           | 1.04      | 1.04        | 1.04      | 1.04        | 1.43       | 1.22         | 1.89       | 2.56         | 3.00       | 5.92         |
| PFKFB4  | 6-phosphofructo-2-kinase/fructose 2,6-bisphosphatase 4 | chr3p22-p21          | carbohydrate metabolic process                                       | ---                                     | 1.41          | 1.42            | -1.22     | 1.31        | 1.42      | 1.51        | -1.09      | -1.20        | 1.12       | 1.24         | 2.81       | 2.77         |
| PFKP    | phosphofructokinase, platelet                          | chr10p15.3-p15.2     | carbohydrate metabolic process                                       | Glycolysis_and_Gluconeogenesis // GenMA | -1.03         | -1.01           | 1.02      | 1.03        | 1.10      | -1.01       | 1.18       | 1.03         | 1.40       | 1.27         | 1.50       | 1.78         |
| PFN4    | profilin family, member 4                              | chr2p23.3            | actin cytoskeleton organization                                      | ---                                     | -2.31         | -1.94           | 1.12      | -1.20       | -1.07     | -1.23       | -1.38      | -1.05        | -1.82      | -2.22        | -2.22      | -1.70        |
| PGAM1   | phosphoglycerate kinase 1                              | chr10q25.3           | carbohydrate metabolic process                                       | Glycolysis_and_Gluconeogenesis // GenMA | -1.13         | 1.03            | -1.05     | -1.01       | -1.03     | -1.12       | 1.08       | 1.03         | 1.38       | 1.26         | 1.07       | 1.22         |
| PGAM2   | phosphoglycerate mutase 2                              | chr7p13-p12          | carbohydrate metabolic process                                       | Glycolysis_and_Gluconeogenesis // GenMA | -1.39         | -1.47           | -1.02     | 1.05        | 1.02      | -1.15       | -1.66      | -1.27        | -1.39      | -1.01        | -1.06      | 1.34         |
| PGAM5   | phosphoglycerate mutase 5                              | chr12q24.33          | 0                                                                    | ---                                     | -1.06         | -1.04           | -1.04     | 1.04        | 1.22      | 1.07        | 1.21       | 1.06         | 1.69       | 1.25         | 1.63       | 1.61         |
| PGAP1   | post-GPI attachment to protein                         | chr2q33.1            | C-terminal protein lipidation                                        | ---                                     | 1.08          | 1.26            | 1.03      | 1.21        | 1.31      | 1.06        | 1.92       | 1.10         | 2.28       | 2.07         | 2.80       | 2.17         |
| PGAP1   | post-GPI attachment to protein                         | chr2q33.1            | C-terminal protein lipidation                                        | ---                                     | 1.20          | 1.06            | 1.24      | -1.01       | -1.28     | 1.04        | -1.21      | -1.46        | -1.47      | -1.29        | -1.39      | -1.26        |
| PGAP1   | post-GPI attachment to protein                         | chr2q33.1            | C-terminal protein lipidation                                        | ---                                     | 1.11          | 1.10            | -1.09     | -1.45       | 1.49      | 2.28        | 1.02       | -1.23        | -1.96      | -1.75        | -2.63      | -2.69        |
| PGAP3   | post-GPI attachment to protein                         | chr17q12             | GPI anchor metabolic process                                         | ---                                     | 1.04          | 1.06            | -1.13     | 1.13        | -1.17     | -1.09       | 1.19       | 1.05         | -1.05      | -1.03        | -1.54      | -1.36        |
| PGAP3   | post-GPI attachment to protein                         | chr17q12             | GPI anchor metabolic process                                         | ---                                     | -1.20         | -1.10           | 1.06      | 1.11        | -1.38     | -1.24       | 1.03       | 1.01         | -1.19      | 1.02         | -1.36      | -1.29        |
| PGBD1   | piggyBac transposable element                          | chr6p22.1            | regulation of transcription, DNA-dependent                           | ---                                     | 1.03          | -1.13           | 1.06      | 1.12        | -1.10     | -1.07       | -1.55      | -1.10        | -1.74      | -2.01        | -1.55      | -1.52        |
| PGBD4   | piggyBac transposable element                          | chr15q14             | 0                                                                    | ---                                     | -1.20         | -1.12           | 1.16      | 1.30        | -1.08     | -1.09       | -1.14      | -1.12        | -2.01      | -2.07        | -1.63      | -1.33        |
| PGF     | placental growth factor                                | chr14q24.3           | angiogenesis                                                         | ---                                     | 3.17          | 2.75            | -1.03     | 1.12        | -1.63     | -1.75       | -1.04      | 1.13         | 2.00       | 1.45         | 1.91       | 2.35         |
| PGK1    | phosphoglycerate kinase 1                              | chrXq13.3            | carbohydrate metabolic process                                       | Glycolysis_and_Gluconeogenesis // GenMA | 1.04          | -1.01           | -1.01     | -1.01       | -1.04     | 1.04        | 1.14       | -1.01        | 1.43       | 1.29         | 1.58       | 1.85         |
| PGK1    | phosphoglycerate kinase 1                              | chrXq13.3            | carbohydrate metabolic process                                       | Glycolysis_and_Gluconeogenesis // GenMA | -1.05         | -1.03           | 1.00      | -1.01       | 1.05      | 1.04        | 1.13       | -1.01        | 1.36       | 1.25         | 1.51       | 1.85         |
| PGK1    | phosphoglycerate kinase 1                              | chrXq13.3            | carbohydrate metabolic process                                       | Glycolysis_and_Gluconeogenesis // GenMA | -1.04         | -1.00           | -1.03     | -1.03       | -1.00     | -1.03       | 1.04       | -1.03        | 1.28       | 1.24         | 1.56       | 1.83         |
| PGK1    | phosphoglycerate kinase 1                              | chrXq13.3            | carbohydrate metabolic process                                       | Glycolysis_and_Gluconeogenesis // GenMA | -1.04         | -1.07           | -1.01     | -1.12       | 1.02      | 1.23        | -1.19      | 1.01         | 1.77       | 2.29         | 2.15       | 3.06         |
| PGK1    | phosphoglycerate kinase 1                              | chrXq13.3            | carbohydrate metabolic process                                       | Glycolysis_and_Gluconeogenesis // GenMA | -1.05         | 1.05            | -1.04     | -1.01       | -1.04     | -1.10       | 1.13       | 1.05         | 1.35       | 1.11         | 1.30       | 1.36         |
| PGM1    | phosphoglucomutase 1                                   | chr1p31              | carbohydrate metabolic process                                       | Glycogen_Metabolism // GenMAPP          | -1.08         | -1.03           | -1.06     | -1.01       | 1.06      | 1.03        | 1.09       | 1.01         | 1.21       | 1.28         | 1.21       | 1.35         |
| PGM2    | phosphoglucomutase 2                                   | chr4p14              | carbohydrate metabolic process                                       | ---                                     | 1.15          | 1.09            | 1.07      | -1.06       | -1.08     | -1.04       | -1.28      | -1.04        | -1.27      | -1.21        | -1.31      | -1.57        |
| PGM2L1  | phosphoglucomutase 2-like                              | chr11q13.4           | carbohydrate metabolic process                                       | ---                                     | 1.20          | 1.05            | -1.22     | -1.29       | -2.87     | -1.20       | -1.13      | -1.23        | -2.16      | -1.76        | -1.49      | -1.18        |
| PGM2L1  | phosphoglucomutase 2-like                              | chr11q13.4           | carbohydrate metabolic process                                       | ---                                     | -1.26         | -1.23           | 1.07      | -1.19       | 1.25      | 1.02        | -1.30      | -1.07        | 2.53       | 2.26         | 3.91       | 3.73         |
| PGM2L1  | phosphoglucomutase 2-like                              | chr11q13.4           | carbohydrate metabolic process                                       | ---                                     | -1.22         | 1.04            | -1.01     | -1.07       | 1.00      | -1.10       | -2.00      | 1.05         | 2.08       | 2.83         | 5.30       | 3.94         |
| PGM2L1  | phosphoglucomutase 2-like                              | chr11q13.4           | carbohydrate metabolic process                                       | ---                                     | -1.10         | 1.04            | -1.05     | -1.19       | -1.36     | -1.12       | -1.29      | -1.41        | 2.40       | 2.31         | 3.20       | 3.65         |
| PGM2L1  | phosphoglucomutase 2-like                              | chr11q13.4           | carbohydrate metabolic process                                       | ---                                     | -1.32         | -1.24           | 1.03      | -1.03       | 1.09      | 1.11        | -1.34      | -1.38        | 1.97       | 2.05         | 2.55       | 2.61         |
| PGM3    | phosphoglucomutase 3                                   | chr6q14.1-q15        | carbohydrate metabolic process                                       | ---                                     | -1.14         | -1.12           | -1.08     | -1.17       | 1.00      | -1.00       | -1.31      | -1.19        | -1.14      | 1.17         | 1.48       | 1.78         |
| PGM3    | phosphoglucomutase 3                                   | chr6q14.1-q15        | carbohydrate metabolic process                                       | ---                                     | 1.01          | -1.04           | -1.01     | -1.05       | 1.11      | 1.11        | 1.03       | -1.12        | 1.40       | 1.44         | 1.87       | 1.95         |
| PGP     | phosphoglycolate phosphatase                           | chr16p13.3           | carbohydrate metabolic process                                       | ---                                     | 1.01          | -1.09           | -1.06     | 1.10        | 1.16      | -1.04       | 1.16       | 1.24         | -1.55      | -1.77        | -1.61      | -1.52        |
| PGPEP1  | pyroglutamate-peptidase 1                              | chr19p13.11          | proteolysis                                                          | ---                                     | -1.07         | 1.09            | -1.04     | -1.09       | 1.01      | -1.10       | 1.14       | 1.13         | 1.03       | -1.04        | 1.21       | 1.19         |
| PGPEP1  | pyroglutamate-peptidase 1                              | chr19p13.11          | proteolysis                                                          | ---                                     | 1.02          | -1.09           | -1.09     | 1.00        | -1.01     | 1.04        | 1.22       | 1.10         | -2.69      | -2.86        | -3.02      | -3.45        |
| PGPEP1  | pyroglutamate-peptidase 1                              | chr19p13.11          | proteolysis                                                          | ---                                     | -1.02         | -1.10           | -1.02     | 1.11        | 1.06      | 1.10        | 1.30       | 1.09         | -1.16      | -1.18        | -1.43      | -1.33        |
| PGRMC2  | progesterone receptor membrane associated protein 2    | chr4q26              | steroid hormone mediated signaling pathway                           | ---                                     | 1.02          | 1.04            | -1.07     | 1.02        | -1.05     | 1.08        | -1.10      | -1.01        | 1.02       | -1.23        | -1.12      | -1.12        |
| PGRMC2  | progesterone receptor membrane associated protein 2    | chr4q26              | steroid hormone mediated signaling pathway                           | ---                                     | 1.00          | 1.00            | -1.02     | 1.10        | -1.10     | -1.02       | -1.23      | -1.12        | -3.64      | -2.39        | -3.96      | -3.45        |
| PHACTR4 | phosphatase and actin regulator 4                      | chr1p35.3            | neural crest cell migration                                          | ---                                     | 1.04          | 1.14            | -1.08     | -1.15       | -1.00     | 1.17        | -1.27      | -1.23        | -1.60      | -1.26        | -1.25      | -1.37        |
| PHAX    | phosphorylated adaptor for RNA polymerase II           | chr5q23.2            | spliceosomal snRNP assembly                                          | ---                                     | 1.12          | 1.01            | -1.01     | 1.09        | -1.06     | 1.06        | -1.10      | -1.00        | -1.41      | -1.25        | -1.22      | -1.28        |
| PHB2    | prohibitin 2                                           | chr12p13             | transcription, DNA-dependent                                         | ---                                     | 1.04          | 1.02            | 1.03      | 1.06        | 1.10      | 1.01        | 1.07       | -1.07        | 1.04       | -1.05        | -1.26      | -1.30        |
| PHC2    | polyhomeotic homolog 2                                 | chr1p34.3            | multicellular organismal development                                 | ---                                     | -1.10         | -1.13           | -1.10     | -1.19       | 1.14      | 1.10        | 1.06       | -1.05        | 1.42       | 1.63         | 1.16       | 1.21         |
| PHC3    | polyhomeotic homolog 3                                 | chr3q26.2            | multicellular organismal development                                 | ---                                     | 1.23          | 1.12            | -1.10     | -1.19       | -1.01     | 1.14        | 1.19       | 1.01         | -1.26      | -1.15        | 1.10       | -1.11        |
| PHC3    | polyhomeotic homolog 3                                 | chr3q26.2            | multicellular organismal development                                 | ---                                     | 1.14          | 1.02            | 1.11      | 1.11        | 1.03      | 1.03        | 1.01       | 1.04         | -1.83      | -1.73        | -1.12      | -1.08        |
| PHF1    | PHD finger protein 1                                   | chr6p21.3            | transcription, DNA-dependent                                         | ---                                     | 1.17          | -1.00           | 1.14      | 1.07        | 1.23      | 1.05        | 1.08       | 1.03         | 1.71       | 1.79         | 1.27       | 1.52         |
| PHF1    | PHD finger protein 1                                   | chr6p21.3            | transcription, DNA-dependent                                         | ---                                     | 1.08          | 1.08            | 1.14      | 1.16        | -1.09     | -1.21       | 1.14       | -1.05        | 1.27       | 1.18         | 1.71       | 1.68         |
| PHF10   | PHD finger protein 10                                  | chr6q27/q28          | transcription, DNA-dependent                                         | ---                                     | -1.02         | 1.00            | 1.05      | 1.23        | 1.17      | 1.01        | 1.04       | 1.04         | 1.33       | 1.07         | -1.04      | 1.11         |
| PHF10   | PHD finger protein 10                                  | chr6q27/q28          | transcription, DNA-dependent                                         | ---                                     | 1.06          | -1.25           | 1.15      | -1.10       | 1.17      | 1.42        | 1.04       | 1.23         | -1.32      | 1.16         | -1.69      | -2.04        |
| PHF11   | PHD finger protein 11                                  | chr13q14.2           | transcription, DNA-dependent                                         | ---                                     | 1.26          | 1.01            | 1.76      | 1.23        | -1.42     | 1.15        | -1.28      | -1.27        | 1.59       | 1.07         | -4.25      | -2.33        |
| PHF11   | PHD finger protein 11                                  | chr13q14.2           | transcription, DNA-dependent                                         | ---                                     | 1.05          | 1.01            | 1.15      | 1.14        | 1.02      | -1.08       | 1.05       | -1.01        | 1.03       | 1.01         | 1.34       | 1.27         |
| PHF12   | PHD finger protein 12                                  | chr17q11.2           | negative regulation of transcription from RNA polymerase II promoter | ---                                     | 1.14          | 1.18            | 1.07      | -1.04       | 1.03      | 1.07        | -1.12      | 1.04         | -1.82      | -1.71        | -1.94      | -2.01        |
| PHF14   | PHD finger protein 14                                  | chr7p21.3            | 0                                                                    | ---                                     | -1.04         | -1.07           | 1.04      | 1.23        | 1.09      | 1.05        | -1.11      | 1.06         | -1.46      | -1.75        | -1.48      | -1.35        |
| PHF15   | PHD finger protein 15                                  | chr5q31.1            | histone H3 acetylation                                               | ---                                     | -1.11         | -1.43           | -1.14     | -1.21       | -1.22     | -1.17       | -1.94      | -1.03        | -1.80      | -1.53        | -1.19      | -2.14        |
| PHF15   | PHD finger protein 15                                  | chr5q31.1            | histone H3 acetylation                                               | ---                                     | -1.00         | -1.08           | 1.00      | 1.03        | 1.05      | -1.10       | -1.30      | -1.16        | -1.61      | -1.72        | -1.76      | -1.89        |
| PHF15   | PHD finger protein 15                                  | chr5q31.1            | histone H3 acetylation                                               | ---                                     | 1.10          | -1.11           | -1.16     | 1.11        | 1.05      | 1.31        | 1.11       | -1.14        | 1.49       | 1.35         | 1.46       | 1.63         |
| PHF17   | PHD finger protein 17                                  | chr4q26-q27          | transcription, DNA-dependent                                         | ---                                     | -1.06         | -1.10           | 1.05      | 1.05        | 1.01      | 1.07        | -1.08      | -1.02        | -1.27      | -1.09        | -1.10      | 1.08         |
| PHF17   | PHD finger protein 17                                  | chr4q26-q27          | transcription, DNA-dependent                                         | ---                                     | 1.08          | 1.00            | 1.07      | 1.17        | -1.05     | -1.08       | 1.41       | 1.26         | 1.59       | 1.53         | 1.42       | 1.50         |
| PHF17   | PHD finger protein 17                                  | chr4q26-q27          | transcription, DNA-dependent                                         | ---                                     | -1.05         | -1.09           | 1.08      | 1.03        | 1.02      | 1.16        | -1.13      | -1.15        | -1.66      | -1.30        | -1.18      | -1.10        |

| ID       | Gene Title                                | Chromosomal Location | 1st Gene Ontology Biological Process      | Pathway                             | A2497 30 mins | A2497P' 30 mins | A2497 2 h | A2497P' 2 h | A2497 4 h | A2497P' 4 h | A2497 24 h | A2497P' 24 h | A2497 48 h | A2497P' 48 h | A2497 72 h | A2497P' 72 h |
|----------|-------------------------------------------|----------------------|-------------------------------------------|-------------------------------------|---------------|-----------------|-----------|-------------|-----------|-------------|------------|--------------|------------|--------------|------------|--------------|
| PHF17    | PHD finger protein 17                     | chr4q26-q27          | transcription, DNA-dependent              | ---                                 | 1.08          | -1.04           | 1.04      | -1.01       | -1.17     | 1.02        | -1.18      | 1.02         | -1.48      | -1.35        | -1.21      | -1.23        |
| PHF19    | PHD finger protein 19                     | chr9q33.2            | negative regulation of transcription from | ---                                 | -1.03         | -1.20           | 1.08      | -1.02       | 1.19      | 1.19        | -1.10      | -1.13        | 1.14       | 1.10         | 1.05       | 1.21         |
| PHF20    | PHD finger protein 20                     | chr20q11.22-q11.23   | transcription, DNA-dependent              | ---                                 | 1.02          | -1.11           | 1.07      | 1.26        | -1.01     | 1.06        | 1.08       | 1.13         | 1.42       | 1.40         | 1.39       | 1.59         |
| PHF20    | PHD finger protein 20                     | chr20q11.22-q11.23   | transcription, DNA-dependent              | ---                                 | -1.10         | -1.21           | -1.01     | -1.18       | 1.15      | -1.07       | 1.12       | -1.10        | 1.15       | 1.24         | 1.80       | 1.42         |
| PHF20    | PHD finger protein 20                     | chr20q11.22-q11.23   | transcription, DNA-dependent              | ---                                 | -1.01         | -1.07           | 1.03      | -1.10       | 1.12      | 1.15        | 1.19       | 1.11         | 1.17       | 1.09         | 1.65       | 1.67         |
| PHF20    | PHD finger protein 20                     | chr20q11.22-q11.23   | transcription, DNA-dependent              | ---                                 | -1.05         | -1.03           | -1.08     | 1.07        | 1.15      | 1.17        | -1.16      | -1.26        | -1.12      | -1.09        | -1.10      | -1.48        |
| PHF20    | PHD finger protein 20                     | chr20q11.22-q11.23   | transcription, DNA-dependent              | ---                                 | -1.12         | -1.40           | -1.83     | 1.31        | 1.08      | -1.36       | 1.20       | 1.58         | 1.08       | 1.19         | 1.90       | 1.87         |
| PHF20L1  | PHD finger protein 20-like                | chr8q24.22           | 0                                         | ---                                 | 1.02          | 1.06            | -1.03     | -1.03       | 1.02      | 1.21        | -1.38      | -1.19        | -2.35      | -3.08        | -2.15      | -2.49        |
| PHF20L1  | PHD finger protein 20-like                | chr8q24.22           | 0                                         | ---                                 | 1.04          | 1.01            | 1.03      | 1.04        | 1.02      | -1.03       | -1.32      | -1.15        | -1.95      | -1.90        | -1.90      | -1.97        |
| PHF20L1  | PHD finger protein 20-like                | chr8q24.22           | 0                                         | ---                                 | -1.07         | -1.13           | 1.05      | -1.00       | 1.01      | 1.02        | 1.01       | 1.06         | -1.69      | -1.65        | -1.56      | -1.43        |
| PHF20L1  | PHD finger protein 20-like                | chr8q24.22           | 0                                         | ---                                 | 1.43          | 1.04            | 1.15      | -1.02       | 1.07      | 1.22        | -1.37      | 1.10         | -2.14      | -1.52        | -2.22      | -1.91        |
| PHF20L1  | PHD finger protein 20-like                | chr8q24.22           | 0                                         | ---                                 | 1.20          | 1.18            | 1.02      | 1.17        | -1.23     | 1.04        | -1.26      | 1.08         | -1.24      | 1.05         | -1.67      | -2.10        |
| PHF20L1  | PHD finger protein 20-like                | chr8q24.22           | 0                                         | ---                                 | 1.15          | 1.07            | 1.10      | 1.27        | 1.17      | 1.15        | 1.35       | 1.42         | 1.62       | 1.80         | 1.10       | 1.35         |
| PHF21A   | PHD finger protein 21A                    | chr11p11.2           | negative regulation of transcription from | ---                                 | -1.04         | 1.04            | 1.36      | 1.11        | -1.65     | -1.40       | -1.55      | -1.57        | -1.42      | -1.98        | -1.49      | -2.49        |
| PHF21A   | PHD finger protein 21A                    | chr11p11.2           | negative regulation of transcription from | ---                                 | -1.11         | -1.21           | 1.03      | 1.03        | -1.30     | -1.21       | 1.34       | 1.16         | 1.36       | 1.56         | 1.01       | 1.27         |
| PHF21A   | PHD finger protein 21A                    | chr11p11.2           | negative regulation of transcription from | ---                                 | 1.09          | -1.05           | 1.01      | 1.13        | -1.20     | -1.15       | 1.13       | 1.21         | 1.41       | 1.55         | 1.01       | 1.08         |
| PHF23    | PHD finger protein 23                     | chr17p13.1           | 0                                         | ---                                 | -1.02         | -1.02           | 1.04      | -1.03       | 1.03      | -1.08       | 1.03       | -1.17        | -1.32      | -1.29        | -1.18      | -1.21        |
| PHF23    | PHD finger protein 23                     | chr17p13.1           | 0                                         | ---                                 | -1.07         | -1.11           | 1.10      | -1.07       | -1.02     | -1.10       | -1.01      | -1.00        | -1.22      | -1.23        | -1.11      | -1.10        |
| PHF2P1   | PHD finger protein 2 pseud                | chr13q11             | 0                                         | ---                                 | 4.63          | 2.82            | -1.76     | -1.95       | 4.53      | 5.99        | 1.46       | 1.74         | 1.11       | 1.85         | 6.63       | 3.54         |
| PHF5A    | PHD finger protein 5A                     | chr22q13.2           | mRNA splicing, via spliceosome            | mRNA_processing_Reactome // GenMAPP | -1.01         | 1.01            | -1.04     | -1.14       | 1.09      | -1.02       | 1.29       | -1.03        | 1.19       | 1.17         | 1.27       | 1.21         |
| PHF6     | PHD finger protein 6                      | chrXq26.3            | transcription, DNA-dependent              | ---                                 | 1.22          | 1.11            | 1.04      | 1.09        | -1.02     | 1.28        | -1.47      | -1.22        | -1.26      | -1.17        | -1.38      | -1.52        |
| PHF7     | PHD finger protein 7                      | chr3p21.1            | 0                                         | ---                                 | 1.07          | -1.16           | -1.03     | -1.23       | 1.11      | -1.11       | 1.11       | 1.03         | 1.22       | 1.43         | 1.90       | 1.85         |
| PHGDH    | phosphoglycerate dehydrogenase            | chr1p12              | glutamine metabolic process               | ---                                 | -1.03         | -1.05           | -1.08     | -1.05       | -1.11     | -1.12       | 1.19       | -1.06        | -1.06      | -1.06        | -1.27      | -1.08        |
| PHIP     | pleckstrin homology domain                | chr6q14              | regulation of protein phosphorylation     | ---                                 | 1.40          | 1.20            | -1.03     | -1.07       | -1.10     | -1.16       | -1.39      | -1.19        | -1.71      | -1.96        | -2.61      | -3.04        |
| PHIP     | pleckstrin homology domain                | chr6q14              | regulation of protein phosphorylation     | ---                                 | 1.06          | 1.09            | -1.16     | -1.15       | -1.23     | 1.03        | -1.12      | -1.11        | -1.36      | -1.20        | -1.20      | -1.28        |
| PHKA1    | phosphorylase kinase, alpha               | chrXq12-q13          | carbohydrate metabolic process            | Glycogen_Metabolism // GenMAPP      | 1.08          | -1.02           | 1.06      | 1.05        | -1.02     | -1.00       | 1.12       | -1.16        | 1.18       | 1.25         | 1.17       | 1.23         |
| PHKA1    | phosphorylase kinase, alpha               | chrXq12-q13          | carbohydrate metabolic process            | Glycogen_Metabolism // GenMAPP      | 1.01          | 1.19            | 1.07      | -1.08       | -1.08     | 1.02        | -1.49      | -1.16        | -1.56      | -1.36        | -1.56      | -1.46        |
| PHKA2    | phosphorylase kinase, alpha               | chrXp22.2-p22.1      | carbohydrate metabolic process            | Glycogen_Metabolism // GenMAPP      | -1.01         | -1.05           | -1.10     | 1.16        | 1.03      | -1.06       | 1.19       | 1.13         | -1.30      | -1.27        | -1.63      | -1.30        |
| PHKB     | phosphorylase kinase, beta                | chr16q12-q13         | carbohydrate metabolic process            | Glycogen_Metabolism // GenMAPP      | 1.02          | -1.01           | -1.00     | 1.01        | -1.02     | 1.02        | -1.05      | -1.10        | -1.23      | -1.12        | -1.50      | -1.34        |
| PHKB     | phosphorylase kinase, beta                | chr16q12-q13         | carbohydrate metabolic process            | Glycogen_Metabolism // GenMAPP      | -1.07         | -1.15           | 1.05      | 1.02        | -1.01     | 1.06        | -1.06      | -1.02        | -1.34      | -1.06        | -1.66      | -1.51        |
| PHKB     | phosphorylase kinase, beta                | chr16q12-q13         | carbohydrate metabolic process            | Glycogen_Metabolism // GenMAPP      | 3.66          | 4.04            | 1.05      | 1.33        | -1.75     | 1.38        | 6.20       | 3.19         | -1.56      | -2.25        | -15.53     | -3.04        |
| PHKB     | phosphorylase kinase, beta                | chr16q12-q13         | carbohydrate metabolic process            | Glycogen_Metabolism // GenMAPP      | 1.00          | 1.13            | 1.03      | -1.09       | -1.06     | -1.05       | -1.11      | -1.05        | -1.53      | -1.23        | -1.75      | -1.89        |
| PHKG2    | phosphorylase kinase, gamma               | chr16p11.2           | carbohydrate metabolic process            | Glycogen_Metabolism // GenMAPP      | 1.41          | 1.31            | 1.41      | 1.55        | 1.31      | -1.17       | -1.40      | -1.05        | -2.30      | -3.12        | -2.18      | -2.07        |
| PHLDA1   | pleckstrin homology-like domain           | chr12q15             | apoptotic process                         | ---                                 | 1.26          | -1.17           | -1.17     | -1.29       | -1.57     | -1.03       | 1.53       | 1.02         | 5.44       | 2.99         | 2.86       | 1.76         |
| PHLDA1   | pleckstrin homology-like domain           | chr12q15             | apoptotic process                         | ---                                 | 1.25          | 1.29            | -1.02     | 1.06        | 1.18      | 1.12        | 2.22       | 1.44         | 3.65       | 2.49         | 2.78       | 1.95         |
| PHLDA1   | pleckstrin homology-like domain           | chr12q15             | apoptotic process                         | ---                                 | 1.28          | 1.28            | -1.01     | -1.13       | 1.05      | 1.06        | 1.49       | 1.06         | 3.43       | 2.43         | 2.37       | 2.04         |
| PHLDA1   | pleckstrin homology-like domain           | chr12q15             | apoptotic process                         | ---                                 | 1.42          | 1.28            | -1.02     | 1.10        | 1.11      | 1.08        | 1.12       | 1.02         | 3.14       | 1.97         | 2.28       | 1.87         |
| PHLDA1   | pleckstrin homology-like domain           | chr12q15             | apoptotic process                         | ---                                 | 1.12          | 1.06            | -1.03     | -1.21       | -1.33     | -1.07       | 1.37       | 1.50         | 2.68       | 1.73         | 2.67       | 2.11         |
| PHLDA1   | pleckstrin homology-like domain           | chr12q15             | apoptotic process                         | ---                                 | 1.20          | 1.28            | -1.08     | 1.04        | 1.11      | 1.18        | 1.80       | 1.50         | 3.10       | 2.17         | 1.30       | 1.12         |
| PHLDA2   | pleckstrin homology-like domain           | chr11p15.4           | apoptotic process                         | ---                                 | -1.06         | -1.03           | -1.10     | -1.25       | -1.22     | -1.09       | 1.08       | 1.18         | 2.57       | 2.17         | 1.65       | 1.64         |
| PHLDA2   | pleckstrin homology-like domain           | chr11p15.4           | apoptotic process                         | ---                                 | 1.11          | 1.07            | -1.08     | -1.15       | 1.17      | 1.14        | -1.07      | -1.03        | 2.00       | 1.71         | 1.71       | 1.49         |
| PHLDA2   | pleckstrin homology-like domain           | chr11p15.4           | apoptotic process                         | ---                                 | 1.24          | 1.12            | -1.26     | -1.08       | -1.31     | 1.02        | -1.01      | -1.01        | 2.15       | 2.26         | 1.67       | 1.57         |
| PHLDA3   | pleckstrin homology-like domain           | chr1q31              | apoptotic process                         | ---                                 | 1.12          | 1.00            | -1.04     | 1.21        | -1.01     | -1.05       | 1.11       | 1.12         | 1.04       | -1.12        | 1.44       | 1.60         |
| PHLDB2   | pleckstrin homology-like domain           | chr3q13.2            | lipid metabolic process                   | ---                                 | -1.10         | 1.37            | -1.17     | 1.13        | 1.20      | 1.11        | 1.52       | 1.38         | 9.58       | 4.61         | 7.80       | 4.35         |
| PHLDB2   | pleckstrin homology-like domain           | chr3q13.2            | lipid metabolic process                   | ---                                 | -1.22         | -1.77           | 1.02      | 1.15        | 1.58      | 1.96        | -1.06      | 1.20         | 4.18       | 1.96         | 2.80       | 2.62         |
| PHLDB2   | pleckstrin homology-like domain           | chr3q13.2            | lipid metabolic process                   | ---                                 | -1.20         | -1.15           | 1.11      | 1.06        | 1.14      | 1.10        | 1.20       | 1.17         | 1.54       | 1.21         | 2.00       | 1.79         |
| PHLDB2   | pleckstrin homology-like domain           | chr3q13.2            | lipid metabolic process                   | ---                                 | -1.04         | 1.08            | -1.07     | -1.02       | -1.06     | 1.05        | -1.03      | 1.05         | 1.05       | 1.15         | 1.19       | 1.17         |
| PHLDB3   | pleckstrin homology-like domain           | chr19q13.31          | 0                                         | ---                                 | 2.07          | 1.73            | -1.31     | 1.30        | 1.45      | 1.17        | 1.00       | -1.49        | 1.58       | 1.34         | 3.63       | 2.84         |
| PHLPP1   | PH domain and leucine rich repeat         | chr18q21.33          | apoptotic process                         | ---                                 | -1.02         | 1.02            | -1.02     | 1.01        | -1.04     | -1.08       | -1.05      | -1.06        | -1.28      | -1.09        | -1.05      | -1.09        |
| PHOSPHO2 | phosphatase, orphan 2                     | chr2q31.1            | metabolic process                         | ---                                 | 1.07          | 1.09            | 1.01      | -1.01       | 1.20      | 1.43        | -1.02      | -1.04        | -3.00      | -2.56        | -2.61      | -2.55        |
| PHPT1    | phosphohistidine phosphatase              | chr9q34.3            | protein dephosphorylation                 | ---                                 | 1.13          | -1.10           | -1.02     | 1.13        | -1.30     | -1.44       | 1.00       | 1.09         | 1.54       | 1.56         | -1.12      | 1.00         |
| PHTF1    | putative homeodomain transcription factor | chr1p13              | transcription, DNA-dependent              | ---                                 | 1.32          | 1.26            | 1.13      | -1.08       | -1.16     | -1.09       | -1.11      | -1.07        | -1.46      | -1.53        | -1.32      | -2.00        |
| PHTF1    | putative homeodomain transcription factor | chr1p13              | transcription, DNA-dependent              | ---                                 | -1.01         | 1.05            | -1.03     | -1.10       | 1.02      | -1.07       | -1.22      | -1.13        | -2.38      | -1.76        | -1.44      | -1.31        |
| PHTF1    | putative homeodomain transcription factor | chr1p13              | transcription, DNA-dependent              | ---                                 | 1.09          | 1.02            | -1.00     | -1.02       | 1.07      | 1.01        | -1.29      | -1.14        | -2.37      | -1.82        | -1.63      | -1.52        |
| PHTF1    | putative homeodomain transcription factor | chr1p13              | transcription, DNA-dependent              | ---                                 | -1.10         | -1.08           | 1.02      | 1.06        | 1.14      | 1.30        | -1.04      | 1.08         | -2.98      | -2.37        | -2.05      | -2.43        |
| PHTF2    | putative homeodomain transcription factor | chr7q11.23-q21       | transcription, DNA-dependent              | ---                                 | 1.17          | 1.11            | -1.03     | -1.04       | 1.06      | 1.15        | -1.42      | -1.18        | -2.49      | -2.00        | -2.46      | -2.43        |
| PHTF2    | putative homeodomain transcription factor | chr7q11.23-q21       | transcription, DNA-dependent              | ---                                 | -1.06         | -1.06           | 1.20      | -1.04       | 1.11      | 1.08        | 1.52       | -1.26        | 1.21       | 1.35         | 1.77       | 1.39         |
| PHTF2    | putative homeodomain transcription factor | chr7q11.23-q21       | transcription, DNA-dependent              | ---                                 | -1.15         | 1.11            | 1.20      | 1.00        | -1.22     | -1.18       | 1.08       | -1.33        | 1.77       | 1.85         | 2.30       | 1.89         |
| PHYH     | phytanoyl-CoA 2-hydroxylase               | chr10p13             | fatty acid alpha-oxidation                | ---                                 | -1.02         | -1.05           | 1.00      | 1.07        | -1.02     | 1.05        | -1.16      | -1.20        | -1.14      | 1.02         | -1.62      | -1.56        |
| PHYHD1   | phytanoyl-CoA dioxygenase                 | chr9q34.11           | oxidation-reduction process               | ---                                 | 1.65          | 1.28            | 1.51      | 1.36        | -1.24     | -1.19       | -1.13      | -1.09        | -1.17      | -1.60        | -3.79      | -3.01        |
| PHYKPL   | 5-phosphohydroxy-L-lysine                 | chr5q35.3            | metabolic process                         | ---                                 | 1.07          | 1.06            | 1.05      | 1.12        | 1.25      | -1.06       | 1.12       | 1.04         | 1.27       | 1.26         | -1.01      | 1.40         |
| PHYKPL   | 5-phosphohydroxy-L-lysine                 | chr5q35.3            | metabolic process                         | ---                                 | 1.07          | 1.02            | 1.04      | 1.19        | 1.07      | -1.06       | 1.09       | 1.07         | 1.39       | 1.22         | 1.13       | 1.36         |
| PI15     | peptidase inhibitor 15                    | chr8q21.1            | negative regulation of peptidase activity | ---                                 | 1.17          | 1.08            | 1.10      | 1.02        | 1.05      | -1.01       | -1.68      | -1.16        | -7.23      | -4.74        | -10.68     | -9.86        |
| PI3      | peptidase inhibitor 3, skin               | chr20q13.12          | copulation                                | ---                                 | 1.74          | 1.57            | 1.05      | 1.36        | -1.12     | -1.39       | 1.24       | 1.30         | 6.47       | 3.85         | 6.40       | 6.02         |
| PI3      | peptidase inhibitor 3, skin               | chr20q13.12          | copulation                                | ---                                 | 1.02          | -1.17           | 1.08      | -1.02       | 1.05      | -1.35       | 1.45       | 1.42         | 6.75       | 4.22         | 5.31       | 4.60         |
| PI4K2A   | phosphatidylinositol 4-kinase             | chr10q24             | basophil degranulation                    | ---                                 | -1.16         | -1.19           | -1.03     | -1.06       | 1.08      | 1.02        | 1.03       | 1.04         | 1.11       | 1.02         | 1.32       | 1.46         |

| ID            | Gene Title                                     | Chromosomal Location | 1st Gene Ontology Biological Process           | Pathway                                  | A2497 30 mins | A2497P' 30 mins | A2497 2 h | A2497P' 2 h | A2497 4 h | A2497P' 4 h | A2497 24 h | A2497P' 24 h | A2497 48 h | A2497P' 48 h | A2497 72 h | A2497P' 72 h |
|---------------|------------------------------------------------|----------------------|------------------------------------------------|------------------------------------------|---------------|-----------------|-----------|-------------|-----------|-------------|------------|--------------|------------|--------------|------------|--------------|
| PI4KA         | phosphatidylinositol 4-kinase                  | chr22q11.21          | phospholipid metabolic process                 | ---                                      | -1.02         | -1.19           | 1.01      | 1.18        | -1.07     | -1.10       | 1.12       | 1.11         | -1.21      | -1.27        | -2.47      | -1.97        |
| PI4KA /// PI4 | phosphatidylinositol 4-kinase                  | chr22q11.21          | phospholipid metabolic process                 | ---                                      | 1.01          | -1.02           | 1.03      | 1.17        | -1.01     | -1.02       | 1.03       | 1.13         | -1.19      | -1.15        | -2.15      | -1.94        |
| PI4KB         | phosphatidylinositol 4-kinase                  | chr1q21              | phospholipid metabolic process                 | ---                                      | 1.05          | -1.08           | -1.04     | -1.18       | -1.28     | -1.00       | -1.27      | -1.01        | -1.32      | -1.12        | -1.35      | -1.35        |
| PIAS1         | protein inhibitor of activator                 | chr15q               | negative regulation of transcription from      | ---                                      | 1.04          | 1.04            | 1.14      | 1.16        | -1.02     | 1.09        | -1.02      | 1.04         | -1.30      | -1.22        | -1.31      | -1.55        |
| PIAS1         | protein inhibitor of activator                 | chr15q               | negative regulation of transcription from      | ---                                      | -1.10         | 1.10            | 1.10      | -1.06       | 1.01      | -1.23       | 1.19       | 1.05         | 1.31       | 1.26         | 1.68       | 1.53         |
| PIAS2         | protein inhibitor of activator                 | chr18q21.1           | transcription, DNA-dependent                   | ---                                      | 1.01          | 1.00            | -1.02     | 1.06        | -1.07     | -1.05       | 1.25       | 1.07         | 1.39       | 1.59         | 1.29       | 1.48         |
| PIAS2         | protein inhibitor of activator                 | chr18q21.1           | transcription, DNA-dependent                   | ---                                      | -1.06         | -1.03           | 1.15      | 1.08        | 1.01      | 1.16        | -1.26      | -1.11        | -1.45      | 1.06         | -1.32      | -1.22        |
| PICALM        | phosphatidylinositol binding                   | chr11q14             | protein complex assembly                       | ---                                      | 1.02          | -1.24           | 1.14      | 1.02        | 1.21      | 1.07        | 1.38       | -1.08        | 1.81       | 1.60         | 2.62       | 2.23         |
| PICALM        | phosphatidylinositol binding                   | chr11q14             | protein complex assembly                       | ---                                      | 1.16          | 1.05            | 1.08      | 1.18        | -1.14     | 1.27        | -1.11      | -1.04        | 1.38       | 1.52         | 1.11       | 1.22         |
| PICALM        | phosphatidylinositol binding                   | chr11q14             | protein complex assembly                       | ---                                      | -1.60         | -2.88           | 1.10      | 1.48        | -1.05     | 1.01        | -1.42      | -1.59        | 1.92       | 1.45         | 1.37       | 1.66         |
| PICALM        | phosphatidylinositol binding                   | chr11q14             | protein complex assembly                       | ---                                      | -1.02         | -1.01           | 1.24      | 1.12        | -1.06     | -1.10       | -1.20      | -1.61        | 1.18       | 1.35         | 1.20       | 1.04         |
| PICALM        | phosphatidylinositol binding                   | chr11q14             | protein complex assembly                       | ---                                      | -1.01         | -1.05           | 1.06      | 1.03        | 1.07      | 1.14        | 1.17       | 1.01         | 1.56       | 1.45         | 1.57       | 1.63         |
| PID1          | phosphotyrosine interaction                    | chr2q36.3            | negative regulation of protein phosphorylation | ---                                      | -1.19         | 1.02            | 1.07      | -1.02       | 1.00      | -1.15       | -1.04      | 1.04         | 2.38       | 1.85         | 1.78       | 1.41         |
| PID1          | phosphotyrosine interaction                    | chr2q36.3            | negative regulation of protein phosphorylation | ---                                      | -1.38         | 1.12            | -1.10     | -1.01       | -1.13     | 1.48        | 1.19       | -2.23        | 5.86       | 4.88         | 2.98       | 3.86         |
| PIEZO1        | piezo-type mechanosensitive ion channel        | chr16q24.3           | transport                                      | ---                                      | 1.07          | -1.03           | -1.05     | -1.13       | -1.05     | 1.05        | -1.02      | 1.05         | 1.13       | 1.40         | -1.55      | -1.11        |
| PIEZO2        | piezo-type mechanosensitive ion channel        | chr18p11.22          | transport                                      | ---                                      | 2.09          | 1.44            | -1.24     | -1.01       | 1.59      | 1.71        | -1.83      | -1.15        | 1.62       | 1.48         | 1.31       | 1.69         |
| PIEZO2        | piezo-type mechanosensitive ion channel        | chr18p11.22          | transport                                      | ---                                      | -1.03         | -1.04           | 1.06      | 1.02        | 1.19      | 1.08        | -1.06      | -1.08        | -3.36      | -2.96        | -4.60      | -4.07        |
| PIEZO2        | piezo-type mechanosensitive ion channel        | chr18p11.22          | transport                                      | ---                                      | 1.18          | 1.06            | 1.05      | -1.04       | -1.06     | -1.01       | -1.32      | -1.09        | -3.98      | -3.00        | -4.65      | -5.17        |
| PIEZO2        | piezo-type mechanosensitive ion channel        | chr18p11.22          | transport                                      | ---                                      | -1.08         | 1.39            | 1.09      | -1.05       | -1.01     | 1.20        | 1.00       | 1.00         | -1.81      | -1.83        | -1.98      | -2.21        |
| PIGA          | phosphatidylinositol glycanase                 | chrXp22.1            | C-terminal protein lipidation                  | ---                                      | 1.09          | 1.05            | 1.01      | 1.00        | -1.04     | 1.07        | -1.03      | -1.12        | 1.28       | 1.52         | 1.46       | 1.30         |
| PIGB          | phosphatidylinositol glycanase                 | chr15q21.3           | C-terminal protein lipidation                  | ---                                      | 1.24          | 1.08            | 1.13      | -1.01       | -1.04     | 1.26        | -1.05      | -1.16        | -1.87      | -1.26        | -1.40      | -1.50        |
| PIGB          | phosphatidylinositol glycanase                 | chr15q21.3           | C-terminal protein lipidation                  | ---                                      | -1.10         | -1.04           | -1.03     | -1.12       | -1.06     | -1.16       | -1.22      | -1.22        | -1.25      | -1.16        | -1.34      | -1.42        |
| PIGG          | phosphatidylinositol glycanase                 | chr4p16.3            | C-terminal protein lipidation                  | ---                                      | -1.05         | -1.10           | -1.02     | 1.07        | -1.01     | -1.07       | -1.08      | -1.04        | -1.50      | -1.35        | -1.07      | 1.20         |
| PIGG          | phosphatidylinositol glycanase                 | chr4p16.3            | C-terminal protein lipidation                  | ---                                      | -1.72         | -1.85           | 1.28      | 1.56        | 1.28      | 1.04        | 1.72       | 1.40         | 1.38       | 1.28         | 2.55       | 2.78         |
| PIGH          | phosphatidylinositol glycanase                 | chr14q24.1           | cellular protein modification process          | ---                                      | -1.03         | -1.04           | 1.09      | 1.05        | 1.20      | 1.01        | -1.05      | 1.00         | -1.52      | -1.42        | 1.02       | 1.02         |
| PIGK          | phosphatidylinositol glycanase                 | chr1p31.1            | protein folding                                | ---                                      | 1.26          | 1.12            | -1.01     | 1.16        | -1.08     | -1.03       | -1.18      | 1.17         | -1.35      | -1.24        | -1.38      | -1.62        |
| PIGK          | phosphatidylinositol glycanase                 | chr1p31.1            | protein folding                                | ---                                      | 1.00          | 2.54            | -1.51     | -1.04       | 1.01      | 1.32        | -1.08      | -1.12        | 1.67       | 1.19         | 1.18       | 1.21         |
| PIGL          | phosphatidylinositol glycanase                 | chr17p12-p11.2       | C-terminal protein lipidation                  | ---                                      | 1.07          | -1.05           | 1.21      | 1.37        | -1.48     | 1.13        | 1.43       | 1.10         | -1.71      | -2.01        | -2.33      | 1.47         |
| PIGL          | phosphatidylinositol glycanase                 | chr17p12-p11.2       | C-terminal protein lipidation                  | ---                                      | -1.14         | -1.20           | -1.18     | -1.13       | -1.03     | 1.03        | -1.11      | -1.12        | 1.12       | 1.25         | 1.94       | 1.68         |
| PIGL          | phosphatidylinositol glycanase                 | chr17p12-p11.2       | C-terminal protein lipidation                  | ---                                      | -1.09         | -1.51           | 1.20      | 1.32        | -1.09     | -1.22       | -1.06      | -1.54        | -1.59      | -1.96        | -1.21      | -1.06        |
| PIGL          | phosphatidylinositol glycanase                 | chr17p12-p11.2       | C-terminal protein lipidation                  | ---                                      | 1.09          | 1.23            | 1.22      | 1.23        | -1.28     | 1.33        | -2.05      | -1.14        | -1.66      | -2.71        | -1.68      | -1.91        |
| PIGL          | phosphatidylinositol glycanase                 | chr17p12-p11.2       | C-terminal protein lipidation                  | ---                                      | 1.01          | 1.05            | 1.01      | 1.07        | 1.03      | 1.11        | 1.11       | 1.06         | 1.42       | 1.62         | 1.89       | 1.85         |
| PIGM          | phosphatidylinositol glycanase                 | chr1q23.2            | C-terminal protein lipidation                  | ---                                      | 1.22          | 1.30            | 1.20      | 1.12        | -1.17     | 1.09        | -1.38      | -1.16        | -1.78      | -2.57        | -2.79      | -2.79        |
| PIGM          | phosphatidylinositol glycanase                 | chr1q23.2            | C-terminal protein lipidation                  | ---                                      | 1.01          | 1.08            | 1.07      | -1.04       | 1.09      | 1.15        | -1.36      | -1.25        | -2.97      | -2.31        | -1.97      | -1.84        |
| PIGM          | phosphatidylinositol glycanase                 | chr1q23.2            | C-terminal protein lipidation                  | ---                                      | 1.41          | 1.43            | 1.13      | -1.05       | -1.32     | -1.13       | -1.06      | -1.06        | -2.43      | -1.99        | -2.78      | -3.65        |
| PIGN          | phosphatidylinositol glycanase                 | chr18q21.33          | C-terminal protein lipidation                  | ---                                      | 1.05          | -1.02           | 1.31      | 1.27        | 1.30      | 1.42        | -1.33      | -1.03        | -1.35      | -1.05        | -1.57      | -1.82        |
| PIGN          | phosphatidylinositol glycanase                 | chr18q21.33          | C-terminal protein lipidation                  | ---                                      | 1.15          | 1.16            | 1.03      | 1.21        | 1.12      | -1.03       | -1.04      | -1.03        | -1.18      | 1.12         | -1.02      | -1.03        |
| PIGO          | phosphatidylinositol glycanase                 | chr9p13.3            | C-terminal protein lipidation                  | ---                                      | -1.05         | 1.06            | -1.13     | -1.17       | -1.05     | -1.02       | -1.01      | -1.18        | -1.14      | -1.30        | 1.23       | 1.34         |
| PIGQ          | phosphatidylinositol glycanase                 | chr16p13.3           | carbohydrate metabolic process                 | ---                                      | 1.06          | 1.15            | -1.06     | 1.14        | -1.18     | -1.09       | 1.21       | 1.14         | -1.13      | -1.44        | -2.12      | -1.70        |
| PIGR          | polymeric immunoglobulin receptor              | chr1q31-q41          | transcription, DNA-dependent                   | ---                                      | 1.24          | -1.25           | -1.18     | 1.16        | 2.98      | 2.54        | -1.00      | -1.71        | -1.19      | 1.06         | 1.41       | 1.58         |
| PIGS          | phosphatidylinositol glycanase                 | chr17p13.2           | C-terminal protein lipidation                  | ---                                      | 1.02          | -1.01           | 1.05      | 1.10        | 1.09      | -1.03       | 1.15       | 1.09         | 1.12       | 1.10         | 1.20       | 1.35         |
| PIGV          | phosphatidylinositol glycanase                 | chr1p36.11           | C-terminal protein lipidation                  | ---                                      | -1.01         | 1.09            | -1.02     | -1.03       | 1.21      | -1.06       | -1.06      | -1.12        | -1.65      | -1.51        | -1.21      | -1.04        |
| PIGV          | phosphatidylinositol glycanase                 | chr1p36.11           | C-terminal protein lipidation                  | ---                                      | 1.03          | -1.01           | 1.10      | 1.08        | -1.06     | -1.07       | 1.02       | 1.01         | -1.56      | -1.47        | -1.38      | -1.21        |
| PIGW          | phosphatidylinositol glycanase                 | chr17q12             | C-terminal protein lipidation                  | ---                                      | 1.24          | 1.14            | -1.02     | 1.02        | -1.08     | 1.26        | -1.34      | -1.17        | -1.62      | -1.36        | -1.46      | -1.49        |
| PIGX          | phosphatidylinositol glycanase                 | chr3q29              | C-terminal protein lipidation                  | ---                                      | 1.06          | -1.02           | 1.06      | -1.03       | -1.09     | 1.05        | -1.24      | -1.03        | -1.44      | -1.18        | -1.63      | -1.40        |
| PIGX          | phosphatidylinositol glycanase                 | chr3q29              | C-terminal protein lipidation                  | ---                                      | 1.01          | -1.12           | 1.02      | 1.04        | 1.12      | -1.02       | -1.07      | -1.07        | -1.23      | -1.12        | -1.47      | -1.35        |
| PIGY /// PYU  | phosphatidylinositol glycanase                 | chr4q /// chr4q22.1  | GPI anchor biosynthetic process                | ---                                      | 1.15          | 1.09            | 1.01      | 1.06        | -1.09     | -1.01       | 1.04       | 1.04         | -1.17      | -1.13        | -1.43      | -1.39        |
| PIGY /// PYU  | phosphatidylinositol glycanase                 | chr4q /// chr4q22.1  | GPI anchor biosynthetic process                | ---                                      | 1.08          | 1.12            | -1.37     | -1.18       | -1.24     | 1.03        | -1.23      | 1.09         | -1.33      | -1.06        | -1.48      | -1.35        |
| PIGZ          | phosphatidylinositol glycanase                 | chr3q29              | GPI anchor biosynthetic process                | ---                                      | -1.02         | -1.13           | 1.21      | 1.48        | -1.26     | -1.06       | 1.08       | 1.13         | -1.03      | -1.38        | -2.24      | -1.86        |
| PIK3C2A       | phosphatidylinositol 3-kinase                  | chr1p15.5-p14        | phospholipid metabolic process                 | ---                                      | -1.08         | -1.25           | -1.02     | -1.20       | 1.14      | 1.04        | 1.27       | 1.27         | 1.22       | 1.34         | 1.60       | 1.43         |
| PIK3C2A       | phosphatidylinositol 3-kinase                  | chr1p15.5-p14        | phospholipid metabolic process                 | ---                                      | 1.09          | 1.13            | -1.06     | -1.25       | -1.03     | 1.16        | -1.13      | 1.04         | -1.61      | -1.30        | -1.32      | -1.45        |
| PIK3C2A       | phosphatidylinositol 3-kinase                  | chr1p15.5-p14        | phospholipid metabolic process                 | ---                                      | 1.38          | 1.01            | 1.23      | -1.22       | -1.74     | -1.12       | 2.16       | 1.77         | 2.68       | 1.46         | 2.53       | 2.46         |
| PIK3C2B       | phosphatidylinositol 3-kinase                  | chr1q32              | phospholipid metabolic process                 | S1P_Signaling // GenMAPP                 | 1.03          | 1.01            | 1.06      | 1.08        | 1.07      | 1.19        | -1.20      | -1.16        | -1.37      | -1.20        | -1.36      | -1.31        |
| PIK3C2A       | phosphatidylinositol 3-kinase                  | chr1p15.5-p14        | phospholipid metabolic process                 | ---                                      | 1.76          | 1.27            | 1.09      | 1.75        | -2.74     | 1.39        | 3.57       | 2.24         | 2.35       | 3.77         | -2.38      | -1.36        |
| PIK3C3        | phosphatidylinositol 3-kinase                  | chr18q12.3           | autophagic vacuole assembly                    | ---                                      | -1.17         | -1.14           | 1.15      | 1.08        | 1.02      | -1.00       | -1.26      | -1.04        | -2.29      | -2.44        | -2.73      | -2.11        |
| PIK3C3        | phosphatidylinositol 3-kinase                  | chr18q12.3           | autophagic vacuole assembly                    | ---                                      | -1.04         | 1.09            | 1.13      | 1.60        | -1.44     | -1.43       | -1.87      | 1.22         | 1.45       | 2.04         | 1.37       | 1.69         |
| PIK3C3        | phosphatidylinositol 3-kinase                  | chr18q12.3           | autophagic vacuole assembly                    | ---                                      | 1.19          | 1.20            | 1.06      | -1.28       | 1.10      | 1.29        | -1.15      | -1.08        | -2.65      | -2.37        | -2.64      | -3.14        |
| PIK3CD        | phosphatidylinositol 4,5-bisphosphate 3-kinase | chr1p36.2            | natural killer cell differentiation            | G13_Signaling_Pathway // GenMAPP         | 1.13          | 1.04            | -1.35     | -1.28       | 1.05      | 1.04        | -1.07      | -1.03        | 1.07       | 1.13         | 1.56       | 1.14         |
| PIK3IP1       | phosphoinositide-3-kinase                      | chr22q12.2           | negative regulation of phosphatidylinositol    | ---                                      | 1.01          | -1.19           | 1.01      | -1.05       | 1.23      | -1.17       | 1.26       | 1.15         | -1.94      | -2.33        | -1.25      | -1.15        |
| PIK3R1        | phosphoinositide-3-kinase                      | chr5q13.1            | response to yeast                              | ---                                      | -1.02         | 1.16            | 1.47      | 1.17        | 1.37      | 1.21        | 1.50       | 1.08         | 1.31       | 1.01         | 1.07       | -1.15        |
| PIK3R1        | phosphoinositide-3-kinase                      | chr5q13.1            | response to yeast                              | ---                                      | 1.15          | -1.08           | 1.17      | -1.02       | -1.02     | -1.05       | -1.07      | -1.24        | -1.10      | -1.03        | -1.30      | -1.29        |
| PIK3R2        | phosphoinositide-3-kinase                      | chr19q13.2-q13.4     | phospholipid metabolic process                 | G13_Signaling_Pathway // GenMAPP /// Int | -1.21         | -1.22           | -1.18     | -1.54       | -1.12     | -1.14       | 1.35       | 1.01         | 1.19       | 1.03         | -1.37      | -1.03        |
| PIK3R2        | phosphoinositide-3-kinase                      | chr19q13.2-q13.4     | phospholipid metabolic process                 | ---                                      | -1.00         | 1.03            | 1.01      | 1.05        | -1.15     | -1.15       | 1.02       | 1.09         | -1.07      | 1.02         | -1.73      | -1.52        |
| PIK3R2        | phosphoinositide-3-kinase                      | chr19q13.2-q13.4     | phospholipid metabolic process                 | G13_Signaling_Pathway // GenMAPP /// Int | 1.03          | -1.03           | 1.03      | 1.12        | -1.05     | -1.03       | 1.15       | 1.15         | -1.06      | -1.07        | -1.70      | -1.53        |
| PIK3R3        | phosphoinositide-3-kinase                      | chr1p34.1            | phospholipid metabolic process                 | ---                                      | -1.15         | -1.08           | 1.07      | 1.00        | 1.17      | 1.12        | -1.52      | -1.19        | -1.65      | -1.38        | -1.31      | -1.39        |
| PIKFYVE       | phosphoinositide kinase                        | chr2q34              | phospholipid metabolic process                 | ---                                      | -1.09         | 1.30            | -1.02     | -1.16       | -1.33     | 1.11        | 1.53       | 1.64         | 1.30       | 1.66         | 1.75       | 1.81         |

| ID       | Gene Title                                     | Chromosomal Location | 1st Gene Ontology Biological Process                            | Pathway                                        | A2497 30 mins | A2497P' 30 mins | A2497 2 h | A2497P' 2 h | A2497 4 h | A2497P' 4 h | A2497 24 h | A2497P' 24 h | A2497 48 h | A2497P' 48 h | A2497 72 h | A2497P' 72 h |
|----------|------------------------------------------------|----------------------|-----------------------------------------------------------------|------------------------------------------------|---------------|-----------------|-----------|-------------|-----------|-------------|------------|--------------|------------|--------------|------------|--------------|
| PIM2     | pim-2 oncogene                                 | chrXp11.23           | G1                                                              | ---                                            | -1.01         | -1.04           | -1.19     | -1.05       | 1.17      | 1.15        | -1.16      | -1.12        | -1.02      | 1.49         | 1.26       | 1.31         |
| PIM3     | pim-3 oncogene                                 | chr22q13             | protein phosphorylation                                         | ---                                            | -1.16         | -1.11           | -1.05     | -1.22       | -1.11     | -1.05       | 1.08       | 1.15         | 1.88       | 1.76         | 1.97       | 1.73         |
| PIN4     | protein (peptidylprolyl cis/trans isomerase)   | chrXq13              | protein peptidyl-prolyl isomerization                           | ---                                            | -1.01         | 1.03            | -1.13     | -1.07       | -1.13     | -1.07       | 1.02       | -1.03        | -1.16      | -1.11        | -1.57      | -1.26        |
| PIN4     | protein (peptidylprolyl cis/trans isomerase)   | chrXq13              | protein peptidyl-prolyl isomerization                           | ---                                            | -1.16         | -1.32           | -1.19     | 1.04        | 1.04      | 1.12        | -1.38      | -1.34        | -1.92      | -1.63        | -1.92      | -2.45        |
| PIN4     | protein (peptidylprolyl cis/trans isomerase)   | chrXq13              | protein peptidyl-prolyl isomerization                           | ---                                            | -1.10         | -1.12           | -1.02     | 1.04        | -1.02     | -1.09       | 1.06       | 1.05         | -1.03      | -1.13        | -1.46      | -1.19        |
| PINK1    | PTEN induced putative kinase 1                 | chr1p36              | mitochondrion degradation                                       | ---                                            | 1.07          | 1.06            | 1.10      | 1.19        | 1.16      | 1.02        | 1.02       | 1.01         | -1.46      | -1.38        | -1.84      | -1.56        |
| PIP4K2A  | phosphatidylinositol-5-phosphatase             | chr10p12.2           | phospholipid metabolic process                                  | G13_Signaling_Pathway // GenMAPP               | -1.24         | -1.22           | 1.31      | 1.27        | 1.13      | 1.13        | 1.39       | 1.03         | 2.26       | 2.21         | 1.71       | 1.49         |
| PIPSK1A  | phosphatidylinositol-4-phosphatase             | chr1q21.3            | phospholipid metabolic process                                  | ---                                            | -1.06         | -1.08           | 1.07      | -1.38       | -1.03     | 1.04        | -1.15      | -1.21        | -1.08      | -1.04        | 1.41       | 1.31         |
| PIPSK1A  | phosphatidylinositol-4-phosphatase             | chr1q21.3            | phospholipid metabolic process                                  | ---                                            | 1.04          | 1.02            | -1.02     | -1.06       | -1.07     | -1.06       | -1.11      | -1.12        | -1.01      | 1.05         | 1.23       | 1.17         |
| PIPOX    | pipecolic acid oxidase                         | chr17q11.2           | L-lysine catabolic process to acetyl-CoA                        | ---                                            | -1.16         | -1.10           | 1.36      | 1.34        | -1.05     | 1.34        | 1.60       | 1.54         | 1.22       | -1.06        | 1.16       | 2.14         |
| PIR      | pirin (iron-binding nuclear protein)           | chrXp22.2            | transcription, DNA-dependent                                    | ---                                            | -1.02         | -1.05           | -1.04     | -1.07       | 1.05      | -1.02       | 1.00       | -1.08        | 1.19       | 1.24         | 1.35       | 1.42         |
| PLSD     | phosphatidylserine decarboxylase               | chr22q12.2           | lipid metabolic process                                         | ---                                            | -1.18         | -1.14           | 1.05      | 1.01        | 1.04      | -1.03       | 1.27       | 1.25         | 1.64       | 1.34         | 1.57       | 1.64         |
| PITHD1   | PITTH (C-terminal protease)                    | chr1p36.11           | 0                                                               | ---                                            | -1.01         | 1.02            | -1.07     | -1.11       | 1.01      | 1.05        | 1.05       | -1.01        | 1.04       | 1.05         | 1.13       | 1.02         |
| PITPNA   | phosphatidylinositol transfer protein A        | chr17p13.3           | lipid metabolic process                                         | ---                                            | 1.00          | 1.01            | 1.06      | 1.02        | 1.01      | 1.01        | -1.21      | -1.11        | -1.30      | -1.39        | -1.18      | -1.23        |
| PITPNA   | phosphatidylinositol transfer protein A        | chr17p13.3           | lipid metabolic process                                         | ---                                            | -1.05         | -1.01           | -1.12     | -1.10       | -1.01     | -1.13       | -1.11      | -1.14        | -1.32      | -1.40        | -1.12      | -1.17        |
| PITPNB   | phosphatidylinositol transfer protein B        | chr22q12.1           | in utero embryonic development                                  | ---                                            | -1.00         | -1.00           | -1.01     | -1.01       | 1.05      | 1.05        | 1.04       | 1.09         | 1.11       | 1.19         | 1.12       | 1.13         |
| PITPNC1  | phosphatidylinositol transfer protein C1       | chr17q24.2           | signal transduction                                             | ---                                            | -1.29         | -1.15           | 1.20      | 1.16        | -1.18     | 1.22        | 1.60       | 1.52         | 2.54       | 2.24         | 2.82       | 2.48         |
| PITPNC1  | phosphatidylinositol transfer protein C1       | chr17q24.2           | transport                                                       | ---                                            | 1.16          | 1.76            | 1.21      | 1.07        | -1.89     | -1.48       | 1.27       | 1.46         | 1.90       | 1.00         | -1.12      | 1.01         |
| PITPNC1  | phosphatidylinositol transfer protein C1       | chr17q24.2           | transport                                                       | ---                                            | -1.24         | -1.10           | 1.95      | 1.77        | 1.40      | 1.18        | 2.07       | 1.15         | -1.57      | -1.74        | -1.53      | -2.46        |
| PITPNC1  | phosphatidylinositol transfer protein C1       | chr17q24.2           | transport                                                       | ---                                            | -2.22         | -6.34           | 2.31      | -1.44       | 1.66      | -1.04       | 3.10       | 1.98         | 2.23       | 1.99         | 3.18       | 2.78         |
| PITPNC1  | phosphatidylinositol transfer protein C1       | chr17q24.2           | transport                                                       | ---                                            | -1.01         | 1.14            | 1.05      | 1.07        | 1.16      | -1.04       | 1.46       | 1.09         | 3.75       | 2.62         | 2.43       | 2.55         |
| PITPNM1  | phosphatidylinositol transfer protein NM1      | chr11q13             | lipid metabolic process                                         | ---                                            | -1.04         | -1.23           | -1.00     | 1.16        | -1.10     | -1.12       | 1.15       | 1.11         | 1.30       | 1.07         | -1.22      | 1.05         |
| PITPNM2  | phosphatidylinositol transfer protein NM2      | chr17q24.31          | transport                                                       | ---                                            | 1.03          | 1.14            | -1.26     | -1.20       | -1.07     | -1.13       | 1.10       | 1.10         | 1.03       | 1.48         | 1.16       | 1.43         |
| PITPNM3  | PITPNM family member 3                         | chr17p13             | transport                                                       | ---                                            | 1.16          | 1.14            | 1.30      | 1.46        | 1.05      | 1.19        | -1.13      | 1.00         | 1.02       | 1.09         | -1.18      | 1.01         |
| PITRM1   | pitrilysin metalloproteinase                   | chr10p15.2           | proteolysis                                                     | ---                                            | -1.17         | -1.08           | -1.01     | 1.01        | -1.07     | -1.17       | 1.13       | 1.05         | 1.25       | 1.18         | 1.21       | 1.34         |
| PITX1    | paired-like homeodomain 1                      | chr5q31.1            | skeletal system development                                     | ---                                            | -1.01         | -1.18           | 1.06      | 1.01        | 1.18      | -1.05       | 1.01       | -1.04        | 1.26       | 1.20         | -1.02      | 1.39         |
| PITX2    | paired-like homeodomain 2                      | chr4q25              | negative regulation of transcription from RNA 5'-end processing | ---                                            | 1.30          | 1.25            | -1.02     | 1.09        | -1.02     | -1.05       | -1.60      | -1.20        | -1.78      | -1.14        | -2.13      | -2.29        |
| PIWIL2   | piwi-like RNA-mediated gene silencing factor 2 | chr8p21.3            | RNA 5'-end processing                                           | ---                                            | 1.80          | 1.33            | -1.19     | 1.08        | -1.04     | -1.16       | 1.59       | 1.29         | 1.69       | 1.33         | 1.15       | -1.17        |
| PKD2     | polycystic kidney disease 2                    | chr4q22.1            | branching involved in ureteric bud morphogenesis                | ---                                            | 1.11          | 1.20            | -1.01     | -1.10       | 1.19      | 1.03        | -1.18      | -1.09        | -3.58      | -3.05        | -4.10      | -3.92        |
| PKDCC    | protein kinase domain containing               | chr2p21              | skeletal system development                                     | ---                                            | -1.02         | -1.21           | 1.04      | 1.03        | 1.24      | 1.10        | 1.07       | 1.07         | -1.78      | -1.82        | -2.36      | -2.05        |
| PKI55    | DKFZp434H1419                                  | chr2q35              | 0                                                               | ---                                            | -1.04         | -1.01           | 1.06      | 1.09        | -1.01     | -1.01       | -1.17      | 1.09         | -2.27      | -1.75        | -4.91      | -3.79        |
| PKIA     | protein kinase (cAMP-dependent)                | chr8q21.12           | negative regulation of transcription from DNA template          | Calcium_regulation_in_cardiac_cells // GenMAPP | -1.04         | 1.02            | 1.17      | 1.13        | 1.05      | -1.06       | 1.03       | 1.06         | -1.11      | -1.10        | -2.10      | -2.33        |
| PKIA     | protein kinase (cAMP-dependent)                | chr8q21.12           | negative regulation of transcription from DNA template          | Calcium_regulation_in_cardiac_cells // GenMAPP | 1.04          | -1.04           | 1.39      | 1.16        | 1.16      | -1.43       | -1.37      | -1.22        | -1.75      | -1.53        | -5.02      | -3.43        |
| PKIG     | protein kinase (cAMP-dependent)                | chr20q12-q13.1       | negative regulation of transcription from DNA template          | Calcium_regulation_in_cardiac_cells // GenMAPP | 1.24          | 1.05            | -1.08     | -1.02       | -1.24     | 1.01        | -1.03      | -1.06        | -1.46      | -1.50        | -2.31      | -2.31        |
| PKM      | pyruvate kinase, muscle                        | chr15q22             | response to hypoxia                                             | Glycolysis_and_Gluconeogenesis // GenMAPP      | -1.09         | 1.00            | -1.05     | -1.02       | 1.02      | -1.06       | 1.17       | 1.07         | 1.31       | 1.12         | 1.10       | 1.25         |
| PKM      | pyruvate kinase, muscle                        | chr15q22             | carbohydrate metabolic process                                  | Glycolysis_and_Gluconeogenesis // GenMAPP      | 1.09          | 1.00            | 1.16      | 1.14        | 1.21      | 1.11        | 1.07       | -1.01        | -1.56      | -1.19        | -1.40      | -1.10        |
| PKN2     | protein kinase N2                              | chr1p22.2            | transcription, DNA-dependent                                    | ---                                            | 1.17          | 1.12            | -1.06     | -1.02       | -1.06     | 1.05        | -1.27      | -1.15        | -1.52      | -1.30        | -1.22      | -1.37        |
| PKNOX1   | PBX/knotted 1 homeobox                         | chr21q22.3           | angiogenesis                                                    | ---                                            | 1.12          | 1.12            | 1.12      | -1.02       | 1.04      | -1.08       | 1.21       | 1.12         | 1.13       | 1.22         | 1.47       | 1.36         |
| PKNOX1   | PBX/knotted 1 homeobox                         | chr21q22.3           | angiogenesis                                                    | ---                                            | -1.04         | 1.04            | 1.05      | 1.01        | -1.09     | -1.04       | -1.21      | -1.21        | -1.43      | -1.23        | -1.05      | 1.08         |
| PKNOX2   | PBX/knotted 1 homeobox                         | chr11q24.2           | regulation of transcription, DNA-dependent                      | ---                                            | -2.28         | 1.47            | -2.01     | -4.85       | -1.06     | -2.24       | -1.02      | -1.97        | 4.88       | 1.96         | 1.18       | -1.35        |
| PKP2     | plakophilin 2                                  | chr12p11             | desmosome assembly                                              | ---                                            | 1.25          | 1.19            | -1.16     | -1.31       | 1.02      | 1.10        | 1.15       | 1.06         | 1.42       | 1.63         | 1.90       | 1.82         |
| PKP4     | plakophilin 4                                  | chr2q24.1            | cell-cell junction assembly                                     | ---                                            | -1.15         | -1.14           | 1.20      | 1.11        | 1.18      | 1.07        | -1.35      | -1.26        | -1.14      | -1.58        | -1.39      | -1.78        |
| PKP4     | plakophilin 4                                  | chr2q24.1            | cell-cell junction assembly                                     | ---                                            | 1.03          | 1.00            | -1.08     | 1.02        | 1.01      | -1.05       | -1.01      | 1.11         | -1.22      | -1.11        | -1.11      | -1.08        |
| PLA2G12A | phospholipase A2, group X                      | chr4q25              | lipid metabolic process                                         | ---                                            | 1.04          | 1.02            | -1.05     | -1.19       | -1.08     | 1.03        | -1.13      | -1.10        | -1.12      | 1.21         | -1.23      | -1.12        |
| PLA2G12A | phospholipase A2, group X                      | chr4q25              | lipid metabolic process                                         | ---                                            | 1.01          | -1.08           | 1.03      | 1.09        | 1.08      | 1.07        | -1.08      | 1.01         | -1.11      | 1.02         | -1.32      | -1.26        |
| PLA2G12A | phospholipase A2, group X                      | chr4q25              | lipid metabolic process                                         | ---                                            | 1.00          | 1.06            | -1.02     | -1.02       | 1.00      | 1.07        | -1.08      | 1.01         | -1.25      | -1.04        | -1.20      | -1.14        |
| PLA2G16  | phospholipase A2, group X                      | chr11q12.3           | lipid metabolic process                                         | ---                                            | -1.03         | 1.22            | 1.08      | 1.09        | 1.02      | 1.07        | -1.26      | -1.29        | -1.18      | 1.14         | -1.41      | -1.46        |
| PLA2G16  | phospholipase A2, group X                      | chr11q12.3           | lipid metabolic process                                         | ---                                            | -1.12         | -1.06           | 1.01      | 1.08        | -1.01     | -1.09       | 1.21       | 1.14         | 1.84       | 1.67         | 1.36       | 1.38         |
| PLA2G3   | phospholipase A2, group II                     | chr22q12.2           | lipid metabolic process                                         | ---                                            | 1.15          | 1.06            | 1.38      | 1.43        | 1.10      | 1.04        | -1.51      | -1.09        | 2.66       | 2.31         | 1.43       | 1.81         |
| PLA2G4C  | phospholipase A2, group IV                     | chr19q13.3           | lipid metabolic process                                         | ---                                            | -1.68         | -1.70           | 1.22      | -1.21       | 3.95      | 2.49        | -1.77      | -1.26        | -1.64      | -1.41        | 2.42       | -1.68        |
| PLA2G4C  | phospholipase A2, group IV                     | chr19q13.3           | lipid metabolic process                                         | ---                                            | -1.38         | -1.15           | 1.46      | -1.48       | -1.72     | -1.88       | -1.27      | -1.42        | 1.01       | 1.40         | 2.40       | 1.88         |
| PLA2G5   | phospholipase A2, group V                      | chr1p36-p34          | lipid metabolic process                                         | ---                                            | -1.18         | -2.00           | -1.76     | -11.37      | 2.53      | 1.87        | 2.03       | 1.38         | 2.52       | 1.40         | 1.94       | 1.94         |
| PLA2G7   | phospholipase A2, group VII                    | chr6p21.2-p12        | lipid metabolic process                                         | ---                                            | 1.05          | -1.54           | -1.23     | -1.02       | 1.36      | -1.31       | -1.05      | 1.19         | -2.94      | -1.95        | -4.49      | -4.34        |
| PLA2R1   | phospholipase A2 receptor                      | chr2q23-q24          | cytokine production                                             | ---                                            | -1.61         | -1.24           | 1.05      | -1.28       | 1.11      | 1.19        | 1.22       | 1.15         | -1.55      | -1.93        | -1.39      | -1.68        |
| PLAA     | phospholipase A2-activator                     | chr9p21              | phospholipid metabolic process                                  | ---                                            | 1.06          | 1.02            | 1.01      | 1.03        | 1.04      | 1.01        | 1.00       | -1.03        | -1.03      | -1.01        | 1.14       | 1.07         |
| PLAA     | phospholipase A2-activator                     | chr9p21              | phospholipid metabolic process                                  | ---                                            | 1.15          | 1.18            | 1.03      | -1.09       | -1.32     | 1.07        | 1.01       | 1.08         | -2.01      | -1.54        | -1.51      | -2.13        |
| PLAC1    | placenta-specific 1                            | chrXq26              | placenta development                                            | ---                                            | -1.06         | -1.43           | 1.15      | -1.13       | 1.07      | -1.14       | -1.48      | -1.04        | 1.09       | 1.22         | 1.23       | 1.23         |
| PLAC8    | placenta-specific 8                            | chr4q21.22           | positive regulation of cell proliferation                       | ---                                            | 1.12          | 1.00            | -1.03     | -1.26       | 1.09      | 1.09        | -1.02      | 1.10         | -1.52      | -1.34        | -2.22      | -2.66        |
| PLAC9    | placenta-specific 9                            | chr10q22.3           | 0                                                               | ---                                            | -1.40         | 1.50            | 2.70      | 2.33        | 1.68      | -1.49       | -1.35      | 1.12         | -1.05      | 1.15         | -2.08      | 1.04         |
| PLAGL2   | pleiomorphic adenoma gene 2                    | chr20q11.21          | transcription, DNA-dependent                                    | ---                                            | 1.01          | 1.02            | 1.12      | -1.17       | -1.03     | -1.05       | -1.13      | -1.15        | -1.38      | -1.44        | -1.24      | -1.51        |
| PLAGL2   | pleiomorphic adenoma gene 2                    | chr20q11.21          | transcription, DNA-dependent                                    | ---                                            | -1.14         | -1.18           | 1.00      | 1.00        | 1.03      | -1.03       | -1.20      | -1.04        | 1.50       | 1.34         | 1.46       | 1.47         |
| PLAT     | plasminogen activator, tissue                  | chr8p12              | response to hypoxia                                             | Blood_Clotting_Cascade // GenMAPP              | 1.20          | 1.30            | -1.02     | -1.06       | 1.93      | 1.56        | 1.09       | -1.10        | 5.34       | 3.80         | 4.74       | 3.67         |
| PLAU     | plasminogen activator, urokinase               | chr10q22.2           | response to hypoxia                                             | Blood_Clotting_Cascade // GenMAPP /// W        | -1.53         | -1.29           | -2.77     | -3.01       | -1.07     | -1.15       | 3.60       | 1.51         | 6.66       | 3.38         | 4.03       | 5.21         |
| PLAU     | plasminogen activator, urokinase               | chr10q22.2           | response to hypoxia                                             | Blood_Clotting_Cascade // GenMAPP /// W        | 1.99          | 1.49            | 1.22      | 1.31        | 1.15      | 1.17        | -1.77      | -1.59        | 4.85       | 3.42         | 4.51       | 4.26         |
| PLAUR    | plasminogen activator, urokinase               | chr19q13             | C-terminal protein lipidation                                   | ---                                            | -1.13         | -1.11           | 1.05      | 1.01        | 1.15      | 1.03        | 1.30       | 1.14         | 1.70       | 1.48         | 2.06       | 2.40         |
| PLAUR    | plasminogen activator, urokinase               | chr19q13             | regulation of transcription, DNA-dependent                      | ---                                            | -1.12         | 1.06            | -1.04     | -1.13       | 1.00      | 1.10        | 1.28       | 1.01         | 3.45       | 3.11         | 2.62       | 2.50         |

| ID           | Gene Title                                                   | Chromosomal Location  | 1st Gene Ontology Biological Process           | Pathway                                        | A2497 30 mins | A2497P' 30 mins | A2497 2 h | A2497P' 2 h | A2497 4 h | A2497P' 4 h | A2497 24 h | A2497P' 24 h | A2497 48 h | A2497P' 48 h | A2497 72 h | A2497P' 72 h |
|--------------|--------------------------------------------------------------|-----------------------|------------------------------------------------|------------------------------------------------|---------------|-----------------|-----------|-------------|-----------|-------------|------------|--------------|------------|--------------|------------|--------------|
| PLAUR        | plasminogen activator, urokinase                             | chr19q13              | regulation of transcription, DNA-dependent     | ---                                            | 1.00          | 1.09            | -1.03     | -1.18       | 1.09      | -1.03       | 1.42       | 1.03         | 3.31       | 3.14         | 2.86       | 2.81         |
| PLCB1        | phospholipase C, beta 1 (phospholipase C, beta 1)            | chr20p12              | G2                                             | SIP_Signaling // GenMAPP                       | -1.00         | 1.12            | 1.13      | -1.08       | 1.12      | 1.06        | -1.45      | -1.05        | -1.74      | -1.25        | -1.40      | -1.68        |
| PLCB3        | phospholipase C, beta 3 (phospholipase C, beta 3)            | chr11q13              | regulation of systemic arterial blood pressure | Calcium_regulation_in_cardiac_cells // GenMAPP | 1.10          | 1.06            | -1.06     | 1.23        | -1.05     | 1.09        | 1.18       | 1.08         | 1.12       | -1.08        | 1.06       | 1.06         |
| PLCB4        | phospholipase C, gamma 2                                     | chr20p12              | lipid metabolic process                        | ---                                            | -1.05         | 1.02            | 1.02      | 1.09        | 1.04      | -1.16       | -1.06      | -1.03        | -4.54      | -3.19        | -7.42      | -4.74        |
| PLCB4        | phospholipase C, beta 4                                      | chr20p12              | lipid metabolic process                        | ---                                            | 1.09          | 1.08            | -1.03     | 1.13        | -1.06     | 1.12        | -1.16      | 1.08         | -4.11      | -2.70        | -4.04      | -2.96        |
| PLCD3        | phospholipase C, delta 3                                     | chr17q21.31           | angiogenesis                                   | ---                                            | -1.10         | -1.12           | -1.01     | 1.11        | 1.00      | -1.14       | 1.24       | 1.27         | 1.10       | -1.04        | -1.47      | -1.34        |
| PLCD3        | phospholipase C, delta 3                                     | chr17q21.31           | angiogenesis                                   | ---                                            | 1.03          | -1.06           | -1.01     | 1.06        | 1.19      | 1.01        | 1.29       | 1.05         | -1.07      | -1.05        | -1.66      | -1.45        |
| PLCG1        | phospholipase C, gamma 1                                     | chr20q12-q13.1        | activation of MAPKK activity                   | Smooth_muscle_contraction // GenMAPP           | -1.20         | -1.30           | -1.28     | -1.37       | -1.02     | -1.12       | -1.26      | 1.03         | 1.20       | 1.25         | -1.62      | -1.34        |
| PLCG2        | phospholipase C, gamma 2                                     | chr16q24.1            | follicular B cell differentiation              | Smooth_muscle_contraction // GenMAPP           | -1.20         | -1.09           | -1.85     | -1.26       | 1.53      | 1.56        | 2.57       | 2.62         | 3.54       | 2.70         | 2.40       | 2.84         |
| PLCL1        | phospholipase C-like 1                                       | chr2q33               | lipid metabolic process                        | ---                                            | -1.26         | 1.06            | 1.00      | -1.21       | 1.07      | 1.26        | -1.62      | -1.20        | -2.43      | -2.52        | -3.67      | -2.19        |
| PLCL2        | phospholipase C-like 2                                       | chr3p24.3             | lipid metabolic process                        | ---                                            | -1.29         | -1.33           | 1.17      | 1.39        | 1.15      | 1.01        | 1.45       | 1.26         | -1.12      | -1.43        | -2.87      | -2.36        |
| PLCL2        | phospholipase C-like 2                                       | chr3p24.3             | lipid metabolic process                        | ---                                            | -1.52         | -1.42           | 1.23      | 1.21        | 1.14      | 1.15        | 1.30       | 1.10         | 1.07       | -1.10        | -1.69      | -1.43        |
| PLCL2        | phospholipase C-like 2                                       | chr3p24.3             | lipid metabolic process                        | ---                                            | 1.85          | 3.69            | 1.18      | 1.96        | 1.96      | 1.54        | -3.02      | -2.36        | 2.01       | 1.87         | -1.28      | -3.46        |
| PLCXD1       | phosphatidylinositol-specific phospholipase C                | chrXp22.33; Yp11.3    | lipid metabolic process                        | ---                                            | -1.05         | -1.16           | 1.05      | 1.15        | 1.12      | 1.04        | -1.05      | 1.09         | -1.07      | 1.10         | 1.12       | 1.28         |
| PLCXD1       | phosphatidylinositol-specific phospholipase C                | chrXp22.33; Yp11.3    | lipid metabolic process                        | ---                                            | -1.52         | -1.02           | 1.10      | -1.14       | 1.25      | 1.06        | 1.94       | 1.59         | -1.24      | -1.20        | -1.51      | -1.50        |
| PLCXD3       | phosphatidylinositol-specific phospholipase C                | chr5p13.1             | lipid metabolic process                        | ---                                            | -1.21         | -1.45           | 1.24      | 1.52        | 1.37      | 1.36        | -1.87      | -1.31        | -4.82      | -7.93        | -5.18      | -2.76        |
| PLCXD3       | phosphatidylinositol-specific phospholipase C                | chr5p13.1             | lipid metabolic process                        | ---                                            | 1.15          | 1.37            | 1.11      | -1.02       | -1.09     | 1.14        | -1.84      | -1.21        | -19.49     | -7.30        | -10.12     | -10.82       |
| PLD1         | phospholipase D1, phosphatidylcholine-specific phospholipase | chr3q26               | lipid metabolic process                        | ---                                            | -1.03         | 1.06            | -1.13     | -1.01       | -1.27     | 1.00        | -1.39      | 1.61         | 1.47       | 1.20         | 1.57       | 1.64         |
| PLD1         | phospholipase D1, phosphatidylcholine-specific phospholipase | chr3q26               | lipid metabolic process                        | ---                                            | 1.02          | 1.26            | -1.50     | -1.89       | -1.01     | 1.01        | 2.31       | 1.29         | 2.48       | 2.62         | 1.41       | 1.75         |
| PLD1         | phospholipase D1, phosphatidylcholine-specific phospholipase | chr3q26               | lipid metabolic process                        | ---                                            | -1.04         | -1.02           | -1.12     | 1.13        | 1.07      | -1.06       | 1.22       | 1.05         | 1.49       | 1.35         | 1.47       | 1.36         |
| PLD1         | phospholipase D1, phosphatidylcholine-specific phospholipase | chr3q26               | lipid metabolic process                        | ---                                            | 1.02          | 1.04            | -1.05     | -1.23       | -1.19     | -1.28       | 1.44       | 1.49         | 1.58       | 1.59         | 1.63       | 1.44         |
| PLD1         | phospholipase D1, phosphatidylcholine-specific phospholipase | chr3q26               | lipid metabolic process                        | ---                                            | -1.10         | 1.13            | 1.05      | 1.27        | 1.35      | -1.16       | 1.30       | 1.27         | 1.57       | 1.78         | 1.83       | 1.98         |
| PLD4         | phospholipase D family, member 4                             | chr14q32.33           | lipid metabolic process                        | ---                                            | -1.50         | -1.91           | 1.34      | 1.23        | -2.25     | -2.42       | -1.00      | 1.39         | 2.26       | 1.55         | 2.75       | -1.50        |
| PLD6         | phospholipase D family, member 6                             | chr17p11.2            | lipid metabolic process                        | ---                                            | 1.08          | 1.34            | -1.05     | -1.15       | 1.51      | 1.07        | 1.01       | -1.03        | 1.72       | 1.40         | 3.31       | 2.66         |
| PLD6         | phospholipase D family, member 6                             | chr17p11.2            | phospholipid metabolic process                 | ---                                            | -1.03         | -1.30           | 2.19      | 1.15        | 1.18      | -1.39       | -3.50      | 1.55         | 2.83       | 2.52         | 1.10       | 1.09         |
| PLEK2        | pleckstrin 2                                                 | chr14q23.3            | actin cytoskeleton organization                | ---                                            | 1.04          | 1.10            | 1.04      | 1.18        | -1.00     | -1.06       | 1.51       | 1.34         | 1.84       | 1.43         | -1.07      | -1.13        |
| PLEKHA2      | pleckstrin homology domain 2                                 | chr8p11.22            | positive regulation of cell-matrix adhesion    | ---                                            | -1.01         | 1.02            | 1.02      | -1.01       | 1.02      | 1.02        | 1.13       | -1.01        | -1.06      | -1.05        | -1.51      | -1.62        |
| PLEKHA3      | pleckstrin homology domain 3                                 | chr2q31.2             | 0                                              | ---                                            | 1.09          | 1.10            | 1.03      | -1.06       | -1.15     | 1.01        | -1.18      | -1.08        | 1.01       | -1.08        | 1.32       | 1.08         |
| PLEKHA6      | pleckstrin homology domain 6                                 | chr1q32.1             | 0                                              | ---                                            | 1.06          | 1.23            | 1.69      | 1.28        | -1.35     | 1.02        | -1.95      | -1.06        | -1.55      | 1.05         | -2.09      | -1.47        |
| PLEKHA8      | pleckstrin homology domain 8                                 | chr7p21-p11.2         | transport                                      | ---                                            | 1.04          | -1.03           | 1.21      | 1.27        | 1.12      | 1.03        | 1.12       | -1.11        | -1.16      | -1.42        | -1.88      | -1.71        |
| PLEKHB2      | pleckstrin homology domain 2                                 | chr2q21.1             | 0                                              | ---                                            | -1.02         | 1.01            | -1.04     | -1.09       | -1.08     | 1.01        | -1.17      | -1.09        | 1.24       | 1.16         | 1.32       | 1.31         |
| PLEKHB2      | pleckstrin homology domain 2                                 | chr2q21.1             | 0                                              | ---                                            | -1.12         | -1.12           | -1.01     | 1.03        | 1.01      | 1.02        | 1.04       | 1.20         | 1.30       | 1.22         | 1.61       | 1.78         |
| PLEKHF2      | pleckstrin homology domain 2                                 | chr8q22.1             | 0                                              | ---                                            | 1.20          | 1.15            | 1.09      | 1.11        | -1.10     | 1.12        | -1.36      | -1.11        | -2.03      | -1.60        | -1.28      | -1.54        |
| PLEKHG1      | pleckstrin homology domain 1                                 | chr6q25.1             | regulation of Rho protein signal transduction  | ---                                            | 1.89          | 1.67            | -1.07     | -1.30       | 1.74      | 1.89        | 1.43       | 1.14         | -2.26      | -1.78        | -2.18      | -3.24        |
| PLEKHG3      | pleckstrin homology domain 3                                 | chr14q23.3            | regulation of Rho protein signal transduction  | ---                                            | -1.05         | 1.28            | -1.23     | 1.23        | -1.11     | -1.37       | 1.62       | 1.52         | 1.29       | 1.26         | -5.32      | -1.48        |
| PLEKHG4      | pleckstrin homology domain 4                                 | chr16q22.1            | regulation of Rho protein signal transduction  | ---                                            | 1.19          | 1.02            | 1.10      | 1.27        | 1.07      | -1.16       | 1.22       | 1.10         | -1.58      | -1.78        | -1.86      | -1.58        |
| PLEKHG4B     | pleckstrin homology domain 4B                                | chr5p15.33            | regulation of Rho protein signal transduction  | ---                                            | -1.48         | -1.07           | -1.19     | -1.45       | -1.45     | -1.73       | 1.22       | 1.41         | -1.07      | 1.12         | -1.41      | -1.97        |
| PLEKHH1      | pleckstrin homology domain 1                                 | chr14q24.1            | 0                                              | ---                                            | -1.07         | -1.01           | 1.11      | 1.20        | 1.03      | 1.10        | -1.07      | -1.05        | -2.66      | -2.00        | -4.16      | -4.17        |
| PLEKHH1      | pleckstrin homology domain 1                                 | chr14q24.1            | 0                                              | ---                                            | 1.01          | 1.01            | -1.03     | 1.11        | -1.16     | -1.00       | -1.18      | 1.06         | -1.91      | -1.83        | -2.24      | -1.79        |
| PLEKHM1      | pleckstrin homology domain 1                                 | chr17q21.31           | intracellular signal transduction              | ---                                            | -1.10         | -1.09           | 1.11      | 1.16        | 1.08      | -1.02       | -1.06      | 1.10         | -1.25      | -1.48        | -1.06      | -1.01        |
| PLEKHM1      | pleckstrin homology domain 1                                 | chr17q21.31           | intracellular signal transduction              | ---                                            | 1.11          | -1.42           | 1.38      | 1.07        | -1.40     | -1.43       | 1.73       | 1.51         | 2.76       | 1.76         | 2.11       | 1.96         |
| PLEKHM3      | pleckstrin homology domain 3                                 | chr2q33.3             | intracellular signal transduction              | ---                                            | 1.15          | 1.10            | 1.07      | 1.08        | -1.12     | -1.02       | -1.23      | -1.35        | -1.88      | -1.60        | -1.32      | -1.72        |
| PLEKHN1      | pleckstrin homology domain 1                                 | chr1p36.33            | 0                                              | ---                                            | 1.32          | -1.07           | 1.63      | -1.47       | 1.80      | 1.13        | 3.55       | 3.99         | -1.49      | -1.12        | 1.07       | -1.01        |
| PLGLA /// PL | plasminogen-like A (pseudogenes)                             | chr2p11.2 /// chr2q10 | 0                                              | ---                                            | -1.03         | 1.02            | -1.12     | -1.46       | 1.13      | 1.24        | -1.36      | -1.29        | -3.77      | -4.97        | -3.23      | -3.66        |
| PLGLA /// PL | plasminogen-like A (pseudogenes)                             | chr2p11.2 /// chr2q10 | 0                                              | ---                                            | 1.93          | 1.25            | -1.05     | 1.08        | -1.16     | -1.22       | -1.53      | -1.38        | -4.61      | -3.16        | -3.69      | -3.45        |
| PLIN3        | perilipin 3                                                  | chr19p13.3            | transport                                      | ---                                            | -1.08         | -1.10           | 1.02      | 1.00        | 1.02      | -1.08       | -1.03      | -1.05        | 1.97       | 1.84         | 1.87       | 2.39         |
| PLIN5        | perilipin 5                                                  | chr19p13.3            | 0                                              | ---                                            | -1.12         | 1.29            | 1.32      | 1.71        | -1.22     | -1.92       | -1.30      | -1.71        | 2.04       | 1.55         | -1.09      | -1.22        |
| PLK1         | polo-like kinase 1                                           | chr16p12.2            | mitotic sister chromatid segregation           | Cell_cycle_KEGG // GenMAPP                     | -1.09         | -1.07           | 1.01      | 1.04        | 1.06      | -1.12       | -1.05      | -1.01        | 1.41       | 1.34         | 1.56       | 1.54         |
| PLK1S1       | polo-like kinase 1 substrate                                 | chr20p11.23           | spindle organization                           | ---                                            | 1.02          | -1.04           | 1.04      | 1.18        | -1.05     | 1.02        | 1.25       | 1.22         | 1.10       | 1.21         | 1.00       | 1.61         |
| PLK1S1       | polo-like kinase 1 substrate                                 | chr20p11.23           | spindle organization                           | ---                                            | -1.01         | -1.06           | 1.01      | 1.01        | -1.11     | -1.12       | 1.16       | 1.05         | 1.08       | 1.10         | 1.11       | 1.53         |
| PLK4         | polo-like kinase 4                                           | chr4q28               | G2                                             | ---                                            | 1.00          | -1.06           | 1.07      | -1.03       | -1.02     | -1.03       | 1.22       | 1.03         | 1.30       | 1.19         | 1.45       | 1.23         |
| PLOD1        | procollagen-lysine, 2-oxoglutarate-dependent demethylase     | chr1p36.22            | response to hypoxia                            | ---                                            | -1.04         | -1.11           | 1.09      | 1.11        | 1.07      | 1.04        | 1.26       | 1.22         | 1.49       | 1.30         | 1.42       | 1.81         |
| PLOD3        | procollagen-lysine, 2-oxoglutarate-dependent demethylase     | chr7q22               | in utero embryonic development                 | ---                                            | -1.07         | -1.08           | -1.02     | 1.07        | 1.03      | -1.13       | 1.08       | 1.06         | 1.14       | 1.19         | 1.17       | 1.35         |
| PLP1         | proteolipid protein 1                                        | chrXq22               | integrin-mediated signaling pathway            | ---                                            | -1.94         | -1.38           | -1.16     | -1.17       | 3.83      | 2.48        | 11.49      | 9.72         | 6.36       | 8.67         | 4.27       | 16.26        |
| PLP2         | proteolipid protein 2 (colon)                                | chrXp11.23            | ion transport                                  | ---                                            | -1.12         | -1.05           | -1.06     | -1.07       | 1.02      | -1.03       | 1.02       | 1.00         | 1.32       | 1.21         | 1.12       | 1.20         |
| PLRG1        | pleiotropic regulator 1                                      | chr4q31.2-q32.1       | mRNA splicing, via spliceosome                 | ---                                            | -1.04         | 1.01            | 1.05      | 1.00        | 1.11      | -1.02       | 1.02       | -1.02        | -1.31      | -1.33        | -1.07      | -1.18        |
| PLRG1        | pleiotropic regulator 1                                      | chr4q31.2-q32.1       | mRNA splicing, via spliceosome                 | ---                                            | 1.13          | 1.05            | 1.06      | 1.03        | 1.09      | 1.13        | -1.13      | -1.09        | -1.85      | -1.52        | -1.42      | -1.33        |
| PLS1         | plastin 1                                                    | chr3q23               | 0                                              | ---                                            | 1.59          | 1.57            | -1.22     | -1.23       | -1.34     | -1.27       | -1.64      | -1.08        | -1.50      | -1.77        | -1.71      | -2.49        |
| PLSCR1       | phospholipid scramblase 1                                    | chr3q23               | phosphatidylserine biosynthetic process        | ---                                            | 1.16          | 1.12            | 1.04      | 1.14        | -1.17     | -1.09       | 1.29       | 1.20         | -1.03      | -1.32        | 1.24       | 1.02         |
| PLSCR4       | phospholipid scramblase 4                                    | chr3q24               | blood coagulation                              | ---                                            | 1.96          | 1.55            | 1.15      | -1.19       | -1.35     | -1.04       | -1.43      | 1.16         | -1.76      | -2.29        | -1.75      | -2.57        |
| PLVAP        | plasmalemma vesicle associated protein                       | chr19p13.2            | 0                                              | ---                                            | -1.08         | -1.26           | 1.65      | 1.37        | 1.01      | 1.62        | -1.01      | 1.93         | 1.74       | 1.46         | -2.26      | -1.80        |
| PLXDC2       | plexin domain containing 2                                   | chr10p12.31           | multicellular organismal development           | ---                                            | -1.01         | -1.15           | 1.03      | 1.21        | 1.03      | 1.06        | 1.09       | 1.08         | -1.37      | -1.31        | -1.38      | -1.32        |
| PLXNA1       | plexin A1                                                    | chr3q21.3             | signal transduction                            | ---                                            | -1.02         | -1.05           | 1.01      | 1.23        | -1.00     | 1.02        | -1.02      | 1.10         | 1.25       | -1.01        | 1.12       | 1.25         |
| PLXNA4       | plexin A4                                                    | chr7q32.3             | signal transduction                            | ---                                            | -2.96         | -1.34           | -1.82     | -4.38       | -2.03     | -1.83       | 2.24       | -1.80        | -1.36      | 1.13         | 2.22       | 1.62         |
| PLXNB1       | plexin B1                                                    | chr3p21.31            | signal transduction                            | ---                                            | 1.09          | 1.02            | -1.03     | 1.02        | 1.02      | 1.02        | 1.05       | 1.20         | -1.16      | -1.23        | -1.73      | -1.33        |
| PLXNB2       | plexin B2                                                    | chr22q13.33           | neural tube closure                            | ---                                            | -1.37         | -1.32           | 1.06      | 1.14        | -1.38     | -1.34       | -1.10      | -1.36        | -1.24      | -1.06        | -2.21      | -1.19        |

| ID         | Gene Title                   | Chromosomal Location | 1st Gene Ontology Biological Process       | Pathway                                | A2497 30 mins | A2497P' 30 mins | A2497 2 h | A2497P' 2 h | A2497 4 h | A2497P' 4 h | A2497 24 h | A2497P' 24 h | A2497 48 h | A2497P' 48 h | A2497 72 h | A2497P' 72 h |
|------------|------------------------------|----------------------|--------------------------------------------|----------------------------------------|---------------|-----------------|-----------|-------------|-----------|-------------|------------|--------------|------------|--------------|------------|--------------|
| PLXNB3     | plexin B3                    | chrXq28              | protein phosphorylation                    | ---                                    | 1.38          | 1.09            | 1.08      | 1.23        | -1.19     | -1.33       | 1.15       | 1.12         | 1.68       | 2.04         | -1.19      | 1.14         |
| PLXNC1     | plexin C1                    | chr12q23.3           | cell adhesion                              | ---                                    | 1.30          | 1.55            | 1.11      | -1.01       | -1.02     | 1.23        | -1.38      | 1.20         | -2.98      | -2.46        | -2.51      | -1.82        |
| PLXNC1     | plexin C1                    | chr12q23.3           | cell adhesion                              | ---                                    | 1.19          | 1.37            | 1.18      | -1.18       | 1.18      | 1.28        | 1.36       | 1.17         | -4.36      | -2.80        | -2.25      | -1.93        |
| PLXND1     | plexin D1                    | chr3q22.1            | angiogenesis                               | ---                                    | -1.02         | -1.16           | 1.04      | -1.09       | 1.14      | -1.04       | 1.09       | 1.05         | 1.39       | 1.38         | 1.20       | 1.76         |
| PLXND1     | plexin D1                    | chr3q22.1            | angiogenesis                               | ---                                    | -1.05         | -1.10           | 1.00      | -1.01       | 1.04      | 1.03        | 1.12       | 1.08         | 1.43       | 1.50         | 1.29       | 1.88         |
| PLXND1     | plexin D1                    | chr3q22.1            | angiogenesis                               | ---                                    | -1.88         | -1.53           | -1.22     | -1.06       | 1.19      | 2.51        | 1.10       | -1.08        | 1.14       | -1.04        | -1.62      | -1.64        |
| PM20D2     | peptidase M20 domain cont    | chr6q15              | metabolic process                          | ---                                    | 1.03          | 1.02            | 1.01      | 1.07        | 1.10      | 1.22        | -1.20      | -1.07        | -1.54      | -1.35        | -1.49      | -1.55        |
| PM20D2     | peptidase M20 domain cont    | chr6q15              | metabolic process                          | ---                                    | 1.18          | 1.15            | -1.03     | -1.23       | -1.10     | 1.18        | -1.29      | -1.11        | -1.77      | -1.42        | -1.90      | -2.22        |
| PMAIP1     | phorbol-12-myristate-13-ac   | chr18q21.32          | release of cytochrome c from mitochond     | ---                                    | 1.08          | 1.12            | 1.12      | 1.12        | -1.00     | -1.01       | 1.79       | 1.33         | 2.51       | 1.96         | 2.45       | 1.47         |
| PMAIP1     | phorbol-12-myristate-13-ac   | chr18q21.32          | release of cytochrome c from mitochond     | ---                                    | 1.16          | 1.17            | -1.26     | -1.31       | -1.05     | 1.28        | 1.21       | 1.16         | 1.78       | 1.90         | 1.48       | 1.04         |
| PMCH       | pro-melanin-concentrating    | chr12q23.2           | regulation of heart rate                   | ---                                    | -1.12         | -1.14           | -1.06     | -1.10       | 1.07      | -1.06       | -1.02      | 1.01         | -2.02      | -1.70        | -1.13      | -1.26        |
| PMCHL1     | pro-melanin-concentrating    | chr5p14.3            | synaptic transmission                      | ---                                    | -1.07         | 1.06            | 1.01      | -1.05       | 1.60      | 1.83        | -1.36      | 1.13         | -1.43      | 1.00         | -1.36      | -1.80        |
| PMEPA1     | prostate transmembrane pr    | chr20q13.31-q13.33   | transforming growth factor beta receptor   | ---                                    | 1.10          | -1.08           | -1.19     | -1.02       | 1.15      | 1.06        | 1.20       | 1.03         | 1.76       | 1.76         | 1.11       | 1.43         |
| PMEPA1     | prostate transmembrane pr    | chr20q13.31-q13.33   | transforming growth factor beta receptor   | ---                                    | 1.08          | -1.03           | -1.09     | -1.18       | -1.11     | -1.11       | 1.23       | 1.13         | 1.59       | 1.66         | 1.25       | 1.41         |
| PML        | promyelocytic leukemia       | chr15q22             | negative regulation of transcription from  | ---                                    | 1.09          | -1.03           | -1.02     | 1.06        | 1.39      | 1.17        | 1.07       | 1.06         | 1.43       | 1.18         | 1.26       | 1.58         |
| PML        | promyelocytic leukemia       | chr15q22             | negative regulation of transcription from  | ---                                    | -1.35         | -1.02           | -1.07     | 1.22        | -1.08     | -1.39       | 1.77       | 1.01         | 3.07       | 1.66         | -1.03      | -1.04        |
| PML        | promyelocytic leukemia       | chr15q22             | negative regulation of transcription from  | ---                                    | -1.75         | 1.48            | 1.00      | -2.43       | 2.06      | 7.53        | -2.16      | -3.38        | 1.45       | 3.84         | -2.78      | -2.22        |
| PML        | promyelocytic leukemia       | chr15q22             | negative regulation of transcription from  | ---                                    | 3.65          | 3.32            | -1.07     | 2.30        | -3.97     | -1.14       | -1.92      | -1.33        | 2.80       | 1.80         | 1.32       | 1.88         |
| PMM1       | phosphomannomutase 1         | chr22q13.2           | mannose metabolic process                  | ---                                    | -1.05         | -1.11           | -1.05     | -1.13       | 1.06      | 1.04        | 1.08       | -1.04        | -1.03      | 1.06         | 1.02       | 1.25         |
| PMM2       | phosphomannomutase 2         | chr16p13             | protein glycosylation                      | ---                                    | -1.03         | -1.13           | 1.01      | 1.13        | 1.06      | -1.06       | -1.01      | 1.19         | 1.21       | -1.04        | 1.46       | 1.65         |
| PMP22      | peripheral myelin protein 2  | chr17p12             | synaptic transmission                      | ---                                    | 1.08          | 1.07            | -1.03     | -1.08       | 1.01      | -1.02       | 1.05       | -1.02        | 1.32       | 1.25         | 1.38       | 1.20         |
| PMPCB      | peptidase (mitochondrial pr  | chr7q22.1            | proteolysis                                | ---                                    | -1.13         | -1.02           | 1.08      | 1.02        | -1.02     | -1.13       | 1.15       | 1.13         | -1.15      | -1.04        | -1.18      | 1.03         |
| PMPCB      | peptidase (mitochondrial pr  | chr7q22.1            | proteolysis                                | ---                                    | 1.43          | 1.27            | -1.35     | -1.33       | -1.08     | -1.05       | -2.18      | -1.18        | -1.42      | -1.41        | -1.62      | -3.50        |
| PMS1       | PMS1 postmeiotic segregat    | chr2q31.1            | ATP catabolic process                      | ---                                    | -1.48         | 1.27            | 1.34      | -1.65       | 1.68      | 1.66        | -1.15      | 1.58         | 1.51       | 1.61         | 1.23       | -1.35        |
| PMS1       | PMS1 postmeiotic segregat    | chr2q31.1            | ATP catabolic process                      | ---                                    | 2.73          | 3.56            | -1.47     | -1.28       | -1.88     | -1.57       | -1.44      | -1.39        | 1.04       | 1.43         | -1.02      | -1.47        |
| PMS1       | PMS1 postmeiotic segregat    | chr2q31.1            | ATP catabolic process                      | ---                                    | 1.15          | 1.10            | 1.05      | 1.17        | 1.08      | 1.05        | -1.04      | -1.10        | -1.17      | -1.21        | 1.24       | 1.21         |
| PMS2L2     | postmeiotic segregation inc  | chr7q11.23           | mismatch repair                            | ---                                    | -1.08         | -1.37           | 1.23      | 1.37        | 1.16      | 1.05        | 1.01       | 1.05         | -1.36      | -1.40        | -1.14      | -1.15        |
| PMS2P3     | postmeiotic segregation inc  | chr7q11.23           | mismatch repair                            | ---                                    | -1.00         | -1.10           | -1.03     | 1.01        | -1.01     | 1.06        | 1.22       | 1.19         | -1.03      | 1.04         | 1.20       | 1.21         |
| PMS2P4     | postmeiotic segregation inc  | chr7q11.22           | mismatch repair                            | ---                                    | 1.62          | 2.59            | -3.07     | -1.37       | 1.27      | 1.29        | -1.27      | 1.52         | 1.49       | 1.39         | 1.79       | 1.95         |
| PNCK       | pregnancy up-regulated non   | chrXq28              | protein phosphorylation                    | ---                                    | 2.75          | 1.55            | -1.20     | 1.35        | -1.64     | 1.39        | 2.44       | 2.59         | 1.08       | 1.25         | -1.09      | 1.08         |
| PNISR      | PNN-interacting serine/argi  | chr6q16.3            | 0                                          | ---                                    | -1.01         | -1.04           | 1.04      | 1.08        | 1.04      | 1.02        | -1.06      | -1.11        | -1.11      | -1.10        | 1.09       | 1.28         |
| PNISR      | PNN-interacting serine/argi  | chr6q16.3            | 0                                          | ---                                    | -1.21         | -1.21           | 1.10      | -1.26       | 1.05      | -1.00       | 1.33       | 1.21         | 1.51       | 1.24         | 1.72       | 1.26         |
| PNISR      | PNN-interacting serine/argi  | chr6q16.3            | 0                                          | ---                                    | 1.06          | 1.14            | 1.06      | -1.01       | 1.01      | 1.06        | -1.43      | -1.09        | -1.79      | -1.75        | -1.66      | -1.67        |
| PNKD       | paroxysmal nonkinesigenic    | chr2q35              | glutathione biosynthetic process           | ---                                    | 1.23          | 1.05            | 1.05      | -1.01       | 1.06      | 1.13        | 1.48       | 1.31         | 1.50       | 1.76         | -1.01      | 1.01         |
| PNLIPRP2   | pancreatic lipase-related pr | chr10q25.3           | lipid metabolic process                    | ---                                    | 3.28          | 8.54            | -1.18     | -1.01       | 3.40      | 6.68        | 1.95       | 2.45         | -1.65      | -1.83        | -2.07      | 1.69         |
| PNLIPRP3   | pancreatic lipase-related pr | chr10q25.3           | lipid metabolic process                    | ---                                    | -1.88         | -5.09           | 1.89      | 1.70        | 1.15      | -2.32       | 1.34       | -3.06        | 1.05       | 1.21         | 1.95       | 1.43         |
| PNMA1      | paraneoplastic Ma antigen    | chr14q24.3           | inflammatory response to antigenic stim    | ---                                    | 1.05          | -1.04           | -1.04     | 1.00        | -1.04     | 1.09        | -1.24      | -1.27        | -1.44      | -1.07        | -1.62      | -1.49        |
| PNMA2      | paraneoplastic Ma antigen    | chr8p21.2            | apoptotic process                          | ---                                    | 1.16          | 1.17            | -1.00     | -1.03       | 1.03      | 1.03        | 1.22       | 1.13         | -1.72      | -1.56        | -1.74      | -2.13        |
| PNMA6A /// | paraneoplastic Ma antigen    | chrXq28              | 0                                          | ---                                    | -1.12         | -1.04           | -1.19     | 1.22        | 1.17      | 1.05        | 1.18       | 1.04         | 1.68       | 1.38         | 1.37       | 1.63         |
| PNN        | pinin, desmosome associat    | chr14q21.1           | mRNA splicing, via spliceosome             | ---                                    | 1.03          | 1.08            | -1.00     | 1.10        | 1.16      | 1.06        | 1.33       | 1.07         | 1.87       | 1.50         | 1.56       | 1.43         |
| PNN        | pinin, desmosome associat    | chr14q21.1           | mRNA splicing, via spliceosome             | ---                                    | 1.10          | -1.01           | 1.08      | 1.26        | 1.04      | 1.25        | 1.16       | 1.09         | 1.60       | 1.51         | 1.26       | 1.17         |
| PNN        | pinin, desmosome associat    | chr14q21.1           | mRNA splicing, via spliceosome             | ---                                    | 1.03          | -1.00           | 1.02      | 1.22        | 1.08      | 1.06        | 1.33       | 1.18         | 1.75       | 1.44         | 1.45       | 1.44         |
| PNN        | pinin, desmosome associat    | chr14q21.1           | mRNA splicing, via spliceosome             | ---                                    | 1.10          | 1.08            | 1.08      | 1.07        | -1.01     | 1.11        | -1.40      | -1.16        | -1.43      | -1.21        | -1.94      | -1.85        |
| PNO1       | partner of NOB1 homolog      | chr2p14              | 0                                          | ---                                    | 1.05          | 1.01            | 1.02      | -1.08       | -1.09     | -1.07       | -1.12      | 1.01         | -1.16      | -1.01        | 1.53       | 1.12         |
| PNP        | purine nucleoside phosphor   | chr14q13.1           | nucleobase-containing compound metab       | ---                                    | -1.03         | -1.06           | -1.01     | 1.04        | 1.05      | 1.05        | -1.08      | -1.11        | 1.16       | 1.16         | 1.16       | 1.28         |
| PNPLA3     | patatin-like phospholipase   | chr22q13.31          | lipid metabolic process                    | ---                                    | 1.03          | 1.14            | 1.27      | -1.10       | -1.12     | -1.01       | -1.21      | -1.06        | 1.08       | 1.01         | 1.15       | 1.11         |
| PNPLA3     | patatin-like phospholipase   | chr22q13.31          | lipid metabolic process                    | ---                                    | -1.05         | -1.11           | 1.13      | -1.09       | -1.12     | 1.09        | -1.21      | 1.00         | -1.14      | -1.09        | 1.09       | 1.19         |
| PNPLA4     | patatin-like phospholipase   | chrXp22.3            | lipid metabolic process                    | ---                                    | 1.11          | 1.09            | -1.05     | -1.20       | -1.10     | 1.24        | -1.10      | 1.02         | -1.90      | -1.75        | -3.67      | -4.20        |
| PNPLA4     | patatin-like phospholipase   | chrXp22.3            | lipid metabolic process                    | ---                                    | -1.10         | -1.07           | -1.04     | -1.06       | 1.05      | -1.05       | 1.04       | 1.04         | -1.15      | -1.23        | -1.31      | -1.16        |
| PNPLA8     | patatin-like phospholipase   | chr7q31              | prostaglandin biosynthetic process         | Eicosanoid_Synthesis // GenMAPP        | 1.19          | 1.08            | 1.03      | -1.05       | -1.05     | -1.00       | 1.03       | -1.09        | 1.27       | 1.23         | 1.51       | 1.33         |
| PNPO       | pyridoxamine 5'-phosphate    | chr17q21.32          | vitamin metabolic process                  | ---                                    | -1.03         | -1.03           | -1.01     | -1.06       | 1.09      | 1.05        | -1.01      | -1.03        | -1.33      | -1.14        | -1.66      | -1.42        |
| PNPO       | pyridoxamine 5'-phosphate    | chr17q21.32          | vitamin metabolic process                  | ---                                    | 1.02          | 1.05            | -1.12     | -1.11       | -1.08     | -1.01       | -1.04      | -1.08        | 1.02       | 1.12         | -1.13      | -1.24        |
| PNRC1      | proline-rich nuclear recept  | chr6q15              | transcription, DNA-dependent               | ---                                    | 1.24          | 1.18            | 1.22      | 1.21        | -1.29     | -1.03       | -1.35      | -1.10        | -1.06      | 1.27         | 1.28       | 1.38         |
| POC1B      | POC1 centriolar protein ho   | chr12q21.33          | carbohydrate metabolic process             | ---                                    | 1.06          | -1.03           | 1.11      | 1.13        | -1.01     | 1.17        | -1.02      | 1.06         | 1.13       | 1.02         | -1.09      | -1.09        |
| POC5       | POC5 centriolar protein ho   | chr5q13.3            | cell cycle                                 | ---                                    | 1.04          | 1.04            | -1.12     | -1.35       | 1.09      | 1.03        | -1.24      | -1.13        | 1.11       | 1.11         | 1.20       | 1.13         |
| POFUT2     | protein O-fucosyltransfera   | chr21q22.3           | mesoderm formation                         | ---                                    | 1.23          | -1.02           | 1.04      | 1.03        | -1.15     | -1.09       | 1.13       | 1.08         | 1.78       | 1.39         | 1.89       | 1.80         |
| POGLUT1    | protein O-glucosyltransfer   | chr3q13.33           | protein glycosylation                      | ---                                    | -1.28         | -1.19           | 1.24      | 1.07        | 1.31      | 1.06        | -1.03      | -1.01        | -2.02      | -1.79        | -2.40      | -1.95        |
| POGLUT1    | protein O-glucosyltransfer   | chr3q13.33           | protein glycosylation                      | ---                                    | 1.06          | 1.05            | 1.09      | 1.12        | -1.06     | -1.02       | -1.30      | -1.16        | -2.56      | -2.32        | -2.63      | -2.35        |
| POGZ       | pogo transposable element    | chr1q21.3            | cell cycle                                 | ---                                    | 1.02          | -1.58           | 1.42      | 1.12        | 1.36      | 1.52        | -1.00      | 1.18         | -2.13      | -1.57        | -2.15      | -2.06        |
| POLA1      | polymerase (DNA directed     | chrXp22.1-p21.3      | G1                                         | DNA_replication_Reactome // GenMAPP // | 1.09          | 1.06            | -1.09     | 1.00        | -1.11     | -1.04       | -1.29      | -1.15        | -2.19      | -1.80        | -1.88      | -1.91        |
| POLA2      | polymerase (DNA directed     | chr11q13.1           | protein import into nucleus, translocation | DNA_replication_Reactome // GenMAPP // | -1.15         | -1.14           | 1.13      | 1.05        | -1.00     | -1.03       | -1.21      | -1.12        | -1.75      | -1.85        | -2.29      | -1.77        |
| POLD2      | polymerase (DNA directed     | chr7p13              | S phase of mitotic cell cycle              | DNA_replication_Reactome // GenMAPP    | 1.04          | 1.04            | -1.01     | -1.01       | -1.03     | -1.05       | 1.09       | 1.09         | 1.18       | 1.04         | -1.19      | -1.06        |
| POLD3      | polymerase (DNA-directed     | chr11q14             | mitotic cell cycle                         | DNA_replication_Reactome // GenMAPP    | -1.18         | -1.20           | -1.01     | -1.00       | -1.04     | -1.05       | -1.05      | -1.00        | -1.54      | -1.24        | -3.96      | -2.86        |
| POLD4      | polymerase (DNA-directed     | chr11q13             | S phase of mitotic cell cycle              | DNA_replication_Reactome // GenMAPP    | -1.32         | -1.17           | -1.08     | 1.02        | -1.09     | -1.18       | 1.18       | 1.16         | 1.28       | 1.22         | 1.47       | 1.47         |
| POLDIP2    | polymerase (DNA-directed     | chr17q11.2           | mitochondrion morphogenesis                | ---                                    | 1.00          | -1.03           | 1.01      | -1.01       | 1.02      | 1.01        | -1.05      | 1.06         | -1.07      | -1.05        | -1.08      | -1.01        |
| POLDIP3    | polymerase (DNA-directed     | chr22q13.2           | regulation of translation                  | ---                                    | -1.10         | -1.19           | 1.00      | -1.03       | -1.01     | -1.08       | 1.16       | 1.20         | 1.15       | 1.18         | 1.20       | 1.41         |

| ID        | Gene Title                 | Chromosomal Location   | 1st Gene Ontology Biological Process      | Pathway                                | A2497 30 mins | A2497P' 30 mins | A2497 2 h | A2497P' 2 h | A2497 4 h | A2497P' 4 h | A2497 24 h | A2497P' 24 h | A2497 48 h | A2497P' 48 h | A2497 72 h | A2497P' 72 h |
|-----------|----------------------------|------------------------|-------------------------------------------|----------------------------------------|---------------|-----------------|-----------|-------------|-----------|-------------|------------|--------------|------------|--------------|------------|--------------|
| POLE      | polymerase (DNA directed)  | chr12q24.3             | G1                                        | DNA_replication_Reactome // GenMAPP // | -1.07         | -1.14           | -1.05     | 1.14        | -1.08     | -1.03       | -1.05      | 1.02         | -1.16      | -1.39        | -1.59      | -1.34        |
| POLE2     | polymerase (DNA directed)  | chr14q21-q22           | G1                                        | DNA_replication_Reactome // GenMAPP // | -1.09         | -1.05           | 1.12      | 1.09        | 1.11      | 1.03        | -1.07      | -1.01        | -1.92      | -1.75        | -1.44      | -1.49        |
| POLG      | polymerase (DNA directed)  | chr15q25               | DNA metabolic process                     | Nucleotide_Metabolism // GenMAPP       | 1.44          | 2.16            | -2.47     | -1.18       | 1.31      | 1.10        | -3.42      | -1.67        | 5.13       | 5.07         | 1.34       | -1.52        |
| POLG      | polymerase (DNA directed)  | chr15q25               | DNA metabolic process                     | Nucleotide_Metabolism // GenMAPP       | 1.08          | 1.01            | 1.01      | 1.06        | 1.01      | -1.03       | 1.04       | 1.03         | 1.21       | 1.10         | 1.20       | 1.16         |
| POLG      | polymerase (DNA directed)  | chr15q25               | DNA metabolic process                     | Nucleotide_Metabolism // GenMAPP       | 1.05          | 1.01            | -1.01     | -1.15       | -1.08     | 1.04        | 1.15       | 1.15         | -1.01      | 1.14         | 1.12       | 1.33         |
| POLG2     | polymerase (DNA directed)  | chr17q                 | DNA replication                           | ---                                    | -1.07         | -1.01           | 1.01      | 1.26        | 1.06      | 1.11        | 1.05       | 1.03         | 1.08       | 1.03         | 1.27       | 1.17         |
| POLH      | polymerase (DNA directed)  | chr6p21.1              | DNA synthesis involved in DNA repair      | ---                                    | 1.08          | -1.01           | 1.05      | 1.08        | 1.25      | 1.45        | -1.04      | 1.00         | 1.45       | 1.20         | 1.58       | 1.83         |
| POLH      | polymerase (DNA directed)  | chr6p21.1              | DNA synthesis involved in DNA repair      | ---                                    | 1.02          | -1.16           | 1.15      | -1.10       | 1.21      | 1.08        | 1.30       | 1.32         | 1.06       | 1.01         | 1.54       | 1.58         |
| POLH      | polymerase (DNA directed)  | chr6p21.1              | DNA synthesis involved in DNA repair      | ---                                    | 1.20          | 1.19            | -1.34     | -1.13       | -1.02     | -1.17       | 1.16       | 1.08         | 1.30       | -1.08        | 1.44       | 1.31         |
| POLH      | polymerase (DNA directed)  | chr6p21.1              | DNA synthesis involved in DNA repair      | ---                                    | -1.05         | -1.03           | 1.00      | 1.16        | -1.12     | -1.01       | -1.12      | 1.31         | -1.31      | 1.17         | 1.52       | 1.53         |
| POLI      | polymerase (DNA directed)  | chr18q21.1             | DNA replication                           | ---                                    | -1.29         | -1.30           | 1.02      | 1.09        | 1.08      | 1.16        | -1.34      | -1.15        | -1.90      | -1.56        | -1.62      | -1.37        |
| POLI      | polymerase (DNA directed)  | chr18q21.1             | DNA replication                           | ---                                    | 1.01          | 1.07            | -1.07     | 1.09        | 1.19      | 1.12        | 1.21       | 1.11         | -1.39      | -1.11        | 1.06       | 1.23         |
| POLK      | polymerase (DNA directed)  | chr5q13                | DNA replication                           | ---                                    | 1.11          | 1.12            | 1.12      | 1.12        | -1.07     | -1.12       | -1.21      | 1.04         | 1.02       | 1.17         | 1.12       | 1.57         |
| POLK      | polymerase (DNA directed)  | chr5q13                | DNA replication                           | ---                                    | 1.21          | 1.25            | -1.11     | 1.44        | 1.50      | 1.03        | 1.36       | -1.20        | 1.68       | 1.51         | -1.58      | 1.11         |
| POLR1A    | polymerase (RNA) I         | polypchr2p11.2         | transcription, DNA-dependent              | RNA_transcription_Reactome // GenMAPP  | 1.09          | 1.12            | 1.15      | 1.32        | 1.01      | -1.04       | 1.11       | -1.01        | -1.45      | -1.52        | -1.18      | -1.03        |
| POLR1B    | polymerase (RNA) I         | polypchr2p13           | transcription, DNA-dependent              | RNA_transcription_Reactome // GenMAPP  | -1.12         | 1.03            | 1.24      | 1.04        | 1.00      | 1.35        | 1.11       | 1.26         | -2.18      | -1.62        | -1.39      | -1.39        |
| POLR1B    | polymerase (RNA) I         | polypchr2q13           | transcription, DNA-dependent              | RNA_transcription_Reactome // GenMAPP  | -1.01         | -1.04           | -1.02     | 1.13        | -1.05     | 1.01        | -1.03      | 1.02         | -1.12      | -1.13        | -1.14      | -1.06        |
| POLR1B    | polymerase (RNA) I         | polypchr2q13           | transcription, DNA-dependent              | RNA_transcription_Reactome // GenMAPP  | 1.14          | 1.09            | 1.05      | -1.03       | 1.00      | 1.15        | -1.23      | -1.02        | -1.72      | -1.61        | -1.42      | -1.30        |
| POLR1B    | polymerase (RNA) I         | polypchr2q13           | transcription, DNA-dependent              | RNA_transcription_Reactome // GenMAPP  | 1.03          | -1.08           | 1.16      | 1.14        | 1.15      | 1.04        | -1.06      | -1.02        | -1.25      | -1.33        | -1.07      | -1.17        |
| POLR1C    | polymerase (RNA) I         | polypchr6p21.1         | transcription, DNA-dependent              | ---                                    | -1.18         | -1.14           | 1.15      | 1.07        | 1.14      | 1.08        | 1.25       | 1.09         | 1.10       | 1.13         | 1.32       | 1.31         |
| POLR1C    | polymerase (RNA) I         | polypchr6p21.1         | transcription, DNA-dependent              | ---                                    | -1.08         | -1.08           | -1.02     | 1.08        | 1.05      | -1.01       | 1.02       | 1.07         | 1.21       | 1.09         | 1.35       | 1.36         |
| POLR1D    | polymerase (RNA) I         | polypchr13q12.2        | transcription, DNA-dependent              | RNA_transcription_Reactome // GenMAPP  | -1.07         | -1.08           | -1.11     | -1.10       | -1.06     | -1.01       | 1.19       | 1.05         | 1.29       | 1.30         | 1.24       | 1.28         |
| POLR1E    | polymerase (RNA) I         | polypchr9p13.2         | transcription, DNA-dependent              | ---                                    | 1.04          | -1.00           | 1.12      | 1.14        | -1.01     | -1.01       | 1.14       | 1.29         | -1.62      | -1.37        | -1.71      | -1.65        |
| POLR2A    | polymerase (RNA) II        | DNChr17p13.1           | mRNA splicing, via spliceosome            | mRNA_processing_Reactome // GenMAPP    | 1.07          | 1.06            | 1.12      | -1.00       | 1.01      | 1.06        | -1.10      | -1.22        | -1.13      | -1.16        | 1.41       | 1.35         |
| POLR2C    | polymerase (RNA) II        | DNChr16q13-q21         | mRNA splicing, via spliceosome            | RNA_transcription_Reactome // GenMAPP  | -1.08         | -1.07           | -1.02     | -1.03       | 1.01      | -1.02       | -1.04      | -1.06        | 1.13       | 1.10         | 1.28       | 1.37         |
| POLR2C    | polymerase (RNA) II        | DNChr16q13-q21         | mRNA splicing, via spliceosome            | RNA_transcription_Reactome // GenMAPP  | 1.04          | 1.04            | -1.06     | -1.12       | 1.03      | 1.08        | -1.13      | -1.20        | 1.05       | 1.09         | 1.47       | 1.56         |
| POLR2C    | polymerase (RNA) II        | DNChr16q13-q21         | mRNA splicing, via spliceosome            | RNA_transcription_Reactome // GenMAPP  | 1.02          | -1.05           | -1.01     | 1.03        | 1.19      | 1.11        | 1.33       | -1.03        | 1.57       | 1.33         | 1.08       | 1.15         |
| POLR2D    | polymerase (RNA) II        | DNChr2q21              | mRNA splicing, via spliceosome            | ---                                    | -1.09         | -1.11           | 1.00      | 1.04        | 1.05      | 1.01        | 1.11       | 1.08         | 1.77       | 1.54         | 1.93       | 1.96         |
| POLR2F    | polymerase (RNA) II        | DNChr2q13.1            | mRNA splicing, via spliceosome            | RNA_transcription_Reactome // GenMAPP  | -1.18         | -1.17           | -1.10     | -1.10       | 1.06      | -1.07       | 1.04       | 1.19         | -1.19      | -1.26        | -1.37      | -1.63        |
| POLR2F    | polymerase (RNA) II        | DNChr2q13.1            | mRNA splicing, via spliceosome            | RNA_transcription_Reactome // GenMAPP  | 1.09          | -3.47           | -2.51     | -2.69       | 1.06      | -1.47       | 1.16       | 1.66         | 4.99       | 3.79         | 2.53       | 3.74         |
| POLR2J2   | polymerase (RNA) II        | DNChr7q22.1            | transcription, DNA-dependent              | ---                                    | -1.02         | 1.08            | -1.17     | -1.11       | -1.44     | -1.04       | 1.04       | -1.22        | -1.25      | -1.17        | -1.09      | -1.19        |
| POLR2J2   | polymerase (RNA) II        | DNChr7q22.1            | transcription, DNA-dependent              | RNA_transcription_Reactome // GenMAPP  | -1.28         | -1.33           | 1.06      | 1.17        | 1.28      | 1.16        | 1.17       | -1.05        | -2.31      | -1.91        | -1.77      | -1.46        |
| POLR2I4   | polymerase (RNA) II        | DNChr7p13              | 0                                         | ---                                    | -1.29         | -1.29           | 1.08      | 1.15        | 1.34      | 1.37        | -1.04      | -1.18        | -2.20      | -2.10        | -1.73      | -1.83        |
| POLR2I4   | polymerase (RNA) II        | DNChr7p13              | 0                                         | ---                                    | -1.08         | -1.06           | -1.10     | -1.25       | 1.06      | 1.23        | -1.06      | -1.11        | -2.55      | -1.81        | -1.55      | -1.19        |
| POLR2I4   | polymerase (RNA) II        | DNChr7p13              | 0                                         | ---                                    | 1.09          | 1.11            | 1.07      | 1.12        | 1.14      | 1.15        | 1.01       | -1.02        | -2.86      | -2.43        | -2.03      | -2.16        |
| POLR2K    | polymerase (RNA) II        | DNChr8q22.2            | mRNA splicing, via spliceosome            | RNA_transcription_Reactome // GenMAPP  | 1.11          | 1.11            | 1.03      | -1.04       | 1.02      | -1.02       | -1.04      | -1.01        | 1.40       | 1.31         | 1.38       | 1.16         |
| POLR2L    | polymerase (RNA) II        | DNChr1p15              | mRNA splicing, via spliceosome            | ---                                    | -1.03         | -1.09           | 1.08      | 1.06        | 1.14      | 1.04        | -1.00      | -1.10        | -1.25      | -1.58        | -1.79      | -1.85        |
| POLR3A    | polymerase (RNA) III       | DNChr10q22-q23         | transcription, DNA-dependent              | ---                                    | -1.02         | -1.09           | 1.01      | 1.16        | 1.07      | -1.04       | 1.04       | 1.06         | -1.03      | -1.18        | 1.31       | 1.42         |
| POLR3A    | polymerase (RNA) III       | DNChr10q22-q23         | transcription, DNA-dependent              | ---                                    | 1.00          | -1.51           | 1.91      | 1.13        | 2.23      | 2.91        | -9.20      | 1.99         | 3.86       | 6.45         | -6.83      | -1.43        |
| POLR3B    | polymerase (RNA) III       | DNChr12q23.3           | transcription, DNA-dependent              | RNA_transcription_Reactome // GenMAPP  | 1.10          | 1.09            | 1.05      | 1.15        | -1.07     | -1.16       | -1.39      | -1.09        | -1.16      | -1.50        | -1.65      | -1.65        |
| POLR3D    | polymerase (RNA) III       | DNChr8q21              | transcription from RNA polymerase III     | RNA_transcription_Reactome // GenMAPP  | 1.13          | -1.15           | 1.09      | -1.03       | 1.06      | 1.12        | 1.13       | 1.18         | 1.09       | 1.09         | 1.60       | 1.81         |
| POLR3E    | polymerase (RNA) III       | DNChr16p12.2           | transcription, DNA-dependent              | RNA_transcription_Reactome // GenMAPP  | -1.70         | -1.65           | 1.28      | -1.62       | 1.10      | 1.42        | 1.23       | -1.01        | -1.94      | -1.07        | 3.80       | 2.35         |
| POLR3G    | polymerase (RNA) III       | DNChr5q14.3            | regulation of transcription from RNA pol  | ---                                    | 1.09          | 1.17            | 1.07      | -1.03       | -1.04     | 1.02        | -1.07      | -1.11        | 1.25       | 1.35         | 1.21       | -1.03        |
| POLR3G    | polymerase (RNA) III       | DNChr5q14.3            | regulation of transcription from RNA pol  | ---                                    | 1.26          | -1.08           | 1.32      | 1.26        | 1.56      | 1.06        | -4.09      | -1.04        | -1.29      | 1.02         | 1.94       | -1.13        |
| POLR3G    | polymerase (RNA) III       | DNChr5q14.3            | regulation of transcription from RNA pol  | ---                                    | 1.19          | -1.00           | -1.26     | -1.08       | 1.05      | -1.12       | -1.08      | 1.52         | 1.37       | 1.18         | 1.19       | 1.28         |
| POLR3H    | polymerase (RNA) III       | DNChr22q13.2           | nucleobase-containing compound metab      | RNA_transcription_Reactome // GenMAPP  | 1.00          | -1.00           | -1.03     | 1.08        | 1.09      | -1.01       | -1.07      | 1.16         | -2.17      | -2.82        | -2.04      | -1.48        |
| POLR3H    | polymerase (RNA) III       | DNChr22q13.2           | nucleobase-containing compound metab      | RNA_transcription_Reactome // GenMAPP  | -1.06         | -1.09           | -1.03     | 1.07        | 1.12      | 1.07        | -1.11      | -1.05        | -1.39      | -1.87        | -1.20      | -1.09        |
| POLR3K    | polymerase (RNA) III       | DNChr16p13.3           | transcription, DNA-dependent              | RNA_transcription_Reactome // GenMAPP  | 1.03          | 1.01            | -1.06     | -1.13       | -1.08     | -1.04       | -1.03      | 1.11         | 1.32       | 1.13         | 1.30       | 1.13         |
| POLR3K    | polymerase (RNA) III       | DNChr16p13.3           | transcription, DNA-dependent              | RNA_transcription_Reactome // GenMAPP  | 1.31          | 1.32            | 1.10      | 1.38        | -1.04     | -1.05       | -1.43      | 1.07         | 1.75       | 1.60         | 1.59       | 1.37         |
| POLRMT    | polymerase (RNA) mitochr   | chr19p13.3             | transcription from mitochondrial promot   | ---                                    | 1.05          | 1.08            | -1.04     | 1.26        | 1.07      | 1.09        | 1.17       | -1.20        | 1.35       | 1.61         | 2.07       | 2.32         |
| POLRMT    | polymerase (RNA) mitochr   | chr19p13.3             | transcription, DNA-dependent              | ---                                    | 1.11          | 1.08            | 1.07      | 1.36        | 1.01      | -1.06       | 1.35       | 1.27         | 1.76       | 1.36         | 1.69       | 1.67         |
| POM121    | transmembrane n            | chr7q11.2 // chr7q11.2 | mitotic cell cycle                        | ---                                    | -1.05         | -1.09           | -1.01     | -1.01       | -1.04     | 1.01        | -1.06      | 1.03         | -1.28      | -1.18        | -1.30      | -1.15        |
| POM121    | transmembrane n            | chr7q11.2 // chr7q11.2 | mitotic cell cycle                        | ---                                    | -1.01         | -1.11           | 1.13      | 1.03        | 1.15      | 1.12        | 1.05       | -1.06        | -1.34      | -1.30        | -1.02      | -1.03        |
| POM121LSP | transmembrane n            | chr22q11.2             | 0                                         | ---                                    | -3.13         | 1.02            | -2.35     | -2.59       | -2.29     | -3.48       | 1.31       | -1.31        | 1.94       | -1.26        | -1.34      | 2.32         |
| POMGNT1   | protein O-linked mannose   | chr1p34.1              | protein glycosylation                     | ---                                    | 1.07          | 1.03            | 1.09      | 1.07        | -1.02     | 1.08        | 1.25       | 1.04         | 1.25       | 1.35         | 1.28       | 1.25         |
| POMP      | proteasome maturation prot | chr13q12.3             | proteasome assembly                       | ---                                    | -1.05         | 1.02            | -1.07     | -1.05       | -1.02     | 1.01        | -1.05      | 1.02         | 1.22       | 1.20         | 1.11       | 1.07         |
| POMZP3    | POM121 and ZP3 fusion      | chr7q11.23             | 0                                         | ---                                    | 1.16          | 1.07            | 1.01      | 1.21        | 1.03      | 1.07        | 1.08       | 1.10         | 1.45       | 1.39         | 1.52       | 1.67         |
| POMZP3    | POM121 and ZP3 fusion      | chr7q11.23             | positive regulation of type IV hypersens  | Ovarian_Infertility_Genes // GenMAPP   | -1.08         | -1.10           | -1.02     | 1.11        | 1.05      | -1.11       | 1.08       | 1.13         | 1.74       | 1.50         | 1.56       | 1.68         |
| PON1      | paraoxonase 1              | chr7q21.3              | lipid metabolic process                   | ---                                    | -1.20         | -1.08           | 1.29      | 1.19        | -1.22     | -1.30       | -1.48      | -1.08        | -2.64      | -3.40        | -4.52      | -4.18        |
| PON2      | paraoxonase 2              | chr7q21.3              | response to oxidative stress              | ---                                    | 1.01          | -1.01           | 1.00      | 1.00        | 1.11      | 1.07        | -1.02      | -1.12        | -1.28      | -1.08        | -1.41      | -1.24        |
| PON2      | paraoxonase 2              | chr7q21.3              | response to oxidative stress              | ---                                    | -1.00         | 1.05            | -1.07     | 1.07        | -1.06     | -1.00       | -1.12      | -1.14        | 1.04       | 1.06         | -1.26      | -1.11        |
| PON2      | paraoxonase 2              | chr7q21.3              | response to oxidative stress              | ---                                    | -1.28         | -1.61           | 1.17      | 1.42        | -1.02     | 1.27        | 1.27       | -1.29        | -2.13      | -1.21        | -3.44      | -2.27        |
| POP1      | processing of precursor 1, | chr8q22.1              | (tRNA 5'-leader removal                   | ---                                    | -1.27         | -1.20           | -1.02     | 1.06        | 1.10      | -1.10       | -1.30      | -1.10        | -1.64      | -1.89        | -1.99      | -2.14        |
| POP4      | processing of precursor 4, | chr19q12               | (tRNA processing                          | ---                                    | 1.10          | 1.04            | 1.05      | 1.01        | 1.03      | 1.02        | -1.07      | -1.12        | -1.07      | -1.34        | -1.00      | -1.11        |
| POPDC3    | popeye domain containing   | chr6q21                | 0                                         | ---                                    | -2.10         | -1.18           | 1.08      | 1.21        | 1.06      | 1.46        | -1.08      | -2.00        | -1.48      | 1.49         | 2.53       | 2.19         |
| POR       | P450 (cytochrome) oxidore  | chr7q11.2              | regulation of growth plate cartilage chon | ---                                    | 1.16          | 1.03            | -1.07     | 1.13        | -1.03     | 1.04        | 1.12       | 1.12         | 1.36       | 1.18         | 1.32       | 1.51         |

| ID               | Gene Title                                 | Chromosomal Location | 1st Gene Ontology Biological Process        | Pathway                      | A2497 30 mins | A2497P' 30 mins | A2497 2 h | A2497P' 2 h | A2497 4 h | A2497P' 4 h | A2497 24 h | A2497P' 24 h | A2497 48 h | A2497P' 48 h | A2497 72 h | A2497P' 72 h |
|------------------|--------------------------------------------|----------------------|---------------------------------------------|------------------------------|---------------|-----------------|-----------|-------------|-----------|-------------|------------|--------------|------------|--------------|------------|--------------|
| PORCN            | porcupine homolog (Drosophila)             | chrXp11.23           | glycoprotein metabolic process              | ---                          | -1.10         | -1.12           | -1.02     | 1.06        | 1.10      | -1.11       | -1.11      | 1.02         | 1.42       | 1.46         | 1.69       | 2.15         |
| POSTN            | periostin, osteoblast specific             | chr13q13.3           | skeletal system development                 | ---                          | 4.64          | 3.45            | -2.07     | 1.75        | -6.39     | -1.67       | 3.36       | 4.46         | -1.59      | -2.76        | 1.88       | -1.11        |
| POSTN            | periostin, osteoblast specific             | chr13q13.3           | skeletal system development                 | ---                          | 1.64          | 1.66            | 1.29      | 5.34        | 2.68      | 1.06        | 1.13       | 6.39         | -1.25      | 1.24         | 2.16       | -2.85        |
| POT1             | protection of telomeres 1                  | chr7q31.33           | telomere maintenance                        | ---                          | 1.05          | 1.08            | -1.14     | -1.10       | -1.09     | 1.02        | -1.15      | -1.01        | -1.07      | -1.16        | -1.10      | -1.06        |
| POT1             | protection of telomeres 1                  | chr7q31.33           | telomere maintenance                        | ---                          | -1.05         | -1.09           | 1.03      | 1.16        | 1.11      | -1.06       | 1.18       | 1.21         | -1.06      | -1.07        | 1.25       | 1.40         |
| POTEG /// POU2F1 | POTE ankyrin domain family                 | chr14q11.2           | 0                                           | ---                          | 1.04          | -1.10           | 1.20      | 1.34        | -1.00     | -1.06       | -1.06      | -1.13        | -1.17      | -1.85        | -1.53      | -1.86        |
| POU2F1           | POU class 2 homeobox 1                     | chr1q24.2            | transcription, DNA-dependent                | ---                          | -1.03         | 1.05            | -1.03     | 1.25        | -1.01     | -1.12       | 1.30       | 1.27         | 1.36       | 1.32         | 1.04       | 1.18         |
| POU2F3           | POU class 2 homeobox 3                     | chr11q23.3           | transcription, DNA-dependent                | ---                          | 1.38          | 1.28            | -1.35     | -1.93       | 1.02      | 1.20        | -1.03      | 1.02         | -2.99      | -1.65        | -1.56      | -1.75        |
| POU3F1           | POU class 3 homeobox 1                     | chr1p34.1            | transcription, DNA-dependent                | ---                          | -1.09         | -2.93           | -2.13     | -1.81       | 1.00      | -1.30       | -1.16      | -1.46        | -3.35      | -2.87        | -2.14      | -1.50        |
| POU3F2           | POU class 3 homeobox 2                     | chr6q16              | transcription, DNA-dependent                | ---                          | 1.41          | 1.53            | -1.26     | -1.40       | -1.61     | -1.44       | -1.44      | -1.68        | -1.74      | -1.54        | -2.12      | -1.96        |
| POU3F2           | POU class 3 homeobox 2                     | chr6q16              | transcription, DNA-dependent                | ---                          | 1.02          | -1.02           | 1.15      | -1.09       | 1.30      | 1.91        | 1.32       | 1.26         | -2.58      | -2.18        | 1.14       | 1.42         |
| POU3F3           | POU class 3 homeobox 3                     | chr2q12.1            | negative regulation of transcription from   | ---                          | -1.93         | -1.12           | 1.14      | 1.39        | -1.92     | -2.46       | -3.40      | -1.14        | 4.34       | 6.37         | 6.29       | 6.47         |
| POU5F1B          | POU class 5 homeobox 1B                    | chr8q24.21           | transcription, DNA-dependent                | ---                          | 1.08          | -1.40           | 1.16      | 1.07        | 1.12      | 1.28        | 1.01       | -1.09        | 1.74       | 1.69         | -1.26      | -1.17        |
| POU5F1P4         | POU class 5 homeobox 1 p4                  | chr1q22              | endodermal cell fate specification          | ---                          | 1.04          | -1.04           | -1.23     | -1.18       | 1.79      | 1.67        | -1.24      | 1.07         | 1.03       | 1.25         | -1.60      | -1.27        |
| POU6F1           | POU class 6 homeobox 1                     | chr12q13.13          | transcription, DNA-dependent                | ---                          | -1.38         | -1.35           | -1.04     | -1.11       | 1.23      | 1.15        | -1.41      | -1.01        | 1.17       | 1.34         | 1.79       | 1.98         |
| PP12613          | uncharacterized LOC10019                   | chr4q27              | 0                                           | ---                          | -2.18         | -1.27           | 1.50      | 1.99        | 2.02      | -1.13       | -3.49      | -1.62        | 3.78       | 2.68         | -2.36      | 1.19         |
| PP12719          | uncharacterized LOC10065                   | ---                  | 0                                           | ---                          | -1.25         | -1.33           | 1.43      | -1.25       | 1.36      | 1.92        | 1.10       | -1.09        | -13.55     | -4.86        | 1.85       | 1.44         |
| PP13439          | uncharacterized LOC10012                   | chr3q26.31           | 0                                           | ---                          | 1.97          | 2.18            | 1.46      | 1.36        | 1.30      | -3.60       | 3.48       | 2.34         | 1.47       | 1.19         | -1.59      | -4.42        |
| PP7080           | uncharacterized LOC25845                   | chr5p15.33           | 0                                           | ---                          | -1.01         | -1.10           | 1.08      | -1.01       | 1.17      | 1.01        | -1.10      | -1.20        | -1.21      | -1.37        | 1.03       | 1.02         |
| PPA2             | pyrophosphatase (inorganic)                | chr4q25              | rRNA aminoacylation for protein translation | ---                          | 1.27          | 1.25            | -1.08     | -1.16       | -1.35     | 1.10        | -1.25      | 1.04         | 1.33       | 1.41         | 1.21       | -1.38        |
| PPAP2A           | phosphatidic acid phosphatase              | chr5q11              | protein dephosphorylation                   | ---                          | 1.05          | 1.08            | 1.14      | 1.02        | 1.07      | -1.05       | -1.11      | -1.21        | -1.48      | -1.40        | -1.00      | 1.05         |
| PPAP2A           | phosphatidic acid phosphatase              | chr5q11              | protein dephosphorylation                   | ---                          | 1.08          | 1.00            | -1.08     | 1.02        | -1.09     | 1.03        | -1.16      | 1.03         | -1.50      | -1.33        | -1.15      | -1.07        |
| PPAP2B           | phosphatidic acid phosphatase              | chr1p32.2            | blood vessel development                    | ---                          | 1.28          | 1.38            | 1.00      | -1.21       | 1.07      | 1.06        | -1.18      | -1.15        | 1.52       | 1.09         | 2.83       | 1.94         |
| PPAP2B           | phosphatidic acid phosphatase              | chr1p32.2            | blood vessel development                    | ---                          | 1.22          | -1.01           | -1.01     | -1.11       | -1.17     | 1.06        | -1.28      | 1.41         | 2.16       | 1.59         | 2.31       | 1.79         |
| PPAP2B           | phosphatidic acid phosphatase              | chr1p32.2            | blood vessel development                    | ---                          | 1.15          | 1.18            | 1.18      | -1.36       | -1.02     | 1.08        | -1.21      | 1.56         | 1.80       | 1.42         | 2.44       | 1.67         |
| PPAP2C           | phosphatidic acid phosphatase              | chr19p13             | phospholipid metabolic process              | ---                          | -1.13         | -1.22           | -1.01     | 1.02        | 1.12      | 1.01        | -1.12      | -1.08        | 1.05       | -1.01        | 1.00       | 1.14         |
| PPAPDC1B         | phosphatidic acid phosphatase              | chr8p11.23           | metabolic process                           | ---                          | 1.04          | -1.06           | -1.06     | 1.07        | 1.13      | -1.04       | 1.02       | 1.03         | 1.61       | 1.46         | 2.54       | 2.83         |
| PPAPDC1B         | phosphatidic acid phosphatase              | chr8p11.23           | metabolic process                           | ---                          | -1.00         | 1.12            | -1.20     | 1.03        | -1.06     | 1.20        | 1.14       | 1.20         | 1.43       | 1.37         | 2.40       | 2.39         |
| PPAPDC1B         | phosphatidic acid phosphatase              | chr8p11.23           | metabolic process                           | ---                          | 1.11          | 1.33            | 1.01      | -1.09       | -1.05     | 1.03        | -1.32      | -1.34        | 1.55       | 1.34         | 2.99       | 3.04         |
| PPAPDC1B         | phosphatidic acid phosphatase              | chr8p11.23           | metabolic process                           | ---                          | 1.06          | 1.03            | -1.02     | -1.02       | -1.09     | 1.16        | -1.21      | -1.30        | 1.24       | 1.25         | 1.48       | 1.50         |
| PPAPDC2          | phosphatidic acid phosphatase              | chr9p24.1            | metabolic process                           | ---                          | 1.24          | 1.22            | 1.16      | 1.19        | 1.06      | 1.11        | -1.03      | -1.02        | -1.67      | -1.37        | -1.84      | -1.80        |
| PPARA            | peroxisome proliferator-activated receptor | chr22q13.31          | negative regulation of transcription from   | Nuclear_Receptors // GenMAPP | -1.17         | 1.03            | -1.16     | 1.28        | 1.22      | 1.08        | 1.77       | 1.05         | 2.06       | 1.95         | 1.96       | 1.92         |
| PPARA            | peroxisome proliferator-activated receptor | chr22q13.31          | negative regulation of transcription from   | Nuclear_Receptors // GenMAPP | -1.04         | -1.14           | -1.08     | 1.01        | -1.37     | -1.07       | 1.11       | -1.03        | 1.43       | 1.38         | 1.87       | 2.01         |
| PPARA            | peroxisome proliferator-activated receptor | chr22q13.31          | negative regulation of transcription from   | Nuclear_Receptors // GenMAPP | 1.27          | 1.49            | 2.36      | 1.89        | -1.18     | -2.67       | -1.54      | -1.78        | 1.09       | 1.12         | 1.77       | 1.58         |
| PPARA            | peroxisome proliferator-activated receptor | chr22q13.31          | negative regulation of transcription from   | Nuclear_Receptors // GenMAPP | 1.00          | 1.14            | 1.17      | -1.04       | 1.13      | 1.14        | -1.03      | -1.06        | 1.31       | 1.25         | 1.58       | 1.65         |
| PPARA            | peroxisome proliferator-activated receptor | chr22q13.31          | negative regulation of transcription from   | Nuclear_Receptors // GenMAPP | -1.46         | 2.04            | 1.66      | 1.05        | -3.07     | -2.29       | 1.86       | -1.30        | 2.83       | 3.21         | 1.45       | 1.42         |
| PPARA            | peroxisome proliferator-activated receptor | chr22q13.31          | negative regulation of transcription from   | Nuclear_Receptors // GenMAPP | -1.12         | -1.09           | 1.42      | 1.51        | 1.71      | 1.50        | -1.06      | -1.04        | 1.07       | 1.17         | 1.55       | 1.43         |
| PPARG            | peroxisome proliferator-activated receptor | chr3p25              | negative regulation of transcription from   | Nuclear_Receptors // GenMAPP | -1.11         | 1.01            | 1.05      | -1.06       | 1.17      | 1.10        | -1.08      | -1.05        | 2.09       | 1.73         | 2.21       | 2.23         |
| PPARGC1A         | peroxisome proliferator-activated receptor | chr4q15.1            | temperature homeostasis                     | ---                          | 1.25          | 1.11            | -1.00     | 1.01        | -1.06     | 1.06        | -1.50      | -1.39        | -2.98      | -2.13        | -2.62      | -2.71        |
| PPARGC1B         | peroxisome proliferator-activated receptor | chr5q32              | ossification                                | ---                          | -1.07         | 1.57            | -1.43     | -1.69       | -1.38     | 3.35        | 1.40       | -1.01        | 3.89       | 1.33         | -5.36      | -6.87        |
| PPARGC1B         | peroxisome proliferator-activated receptor | chr5q32              | ossification                                | ---                          | 1.91          | 1.80            | 1.33      | 1.69        | 1.22      | 1.18        | 1.51       | -1.08        | 1.21       | 1.44         | 1.14       | 1.20         |
| PPAT             | phosphoribosyl pyrophosphatase             | chr4q12              | GI                                          | ---                          | 1.09          | -1.03           | 1.25      | -1.07       | -1.19     | -1.23       | 1.07       | -1.33        | 1.51       | 1.39         | 1.10       | 1.04         |
| PPBP             | pro-platelet basic protein (CD42b)         | chr4q12-q13          | platelet degranulation                      | ---                          | -2.61         | 1.22            | -1.70     | 1.14        | -1.63     | 1.35        | -2.20      | -2.05        | 2.77       | 3.14         | 11.66      | 12.06        |
| PPDPF            | pancreatic progenitor cell differentiation | chr20q13.33          | multicellular organismal development        | ---                          | -1.21         | -1.19           | 1.00      | 1.15        | -1.05     | -1.13       | 1.24       | 1.27         | 1.86       | 1.50         | 1.04       | 1.23         |
| PPDPF            | pancreatic progenitor cell differentiation | chr20q13.33          | multicellular organismal development        | ---                          | -1.14         | -1.11           | 1.00      | 1.12        | -1.01     | -1.15       | 1.26       | 1.34         | 1.90       | 1.56         | 1.05       | 1.28         |
| PPDPF            | pancreatic progenitor cell differentiation | chr20q13.33          | multicellular organismal development        | ---                          | -1.20         | -1.17           | -1.01     | 1.14        | 1.06      | -1.16       | 1.21       | 1.25         | 1.98       | 1.63         | 1.07       | 1.27         |
| PPEF1            | protein phosphatase, EF-hand domain        | chrXp22              | protein dephosphorylation                   | ---                          | 1.05          | -1.16           | 1.19      | 1.28        | 1.20      | 1.11        | -1.01      | 1.12         | 1.26       | 1.46         | 1.83       | 2.07         |
| PPEF1A           | protein tyrosine phosphatase               | chr11q13.3           | cell-matrix adhesion                        | ---                          | 1.13          | 1.12            | 1.20      | 1.07        | 1.25      | 1.10        | 1.28       | 1.01         | 1.05       | -1.03        | 1.19       | 1.16         |
| PPEF1A           | protein tyrosine phosphatase               | chr11q13.3           | cell-matrix adhesion                        | ---                          | -1.03         | 1.17            | 1.07      | 1.01        | 1.21      | 1.23        | 1.54       | 1.33         | 1.24       | 1.26         | -1.01      | -1.13        |
| PPEF1A3          | protein tyrosine phosphatase               | chr19q13.33          | 0                                           | ---                          | -1.16         | 1.03            | -1.49     | -2.25       | -1.10     | -1.21       | -1.85      | -1.26        | 1.55       | 1.19         | 1.40       | 1.58         |
| PPEF1A3          | protein tyrosine phosphatase               | chr19q13.33          | 0                                           | ---                          | 1.30          | 1.36            | -2.56     | -2.84       | 1.42      | 1.15        | 2.07       | 1.53         | -1.20      | 1.02         | 2.34       | 1.51         |
| PPEF1A4          | protein tyrosine phosphatase               | chr1q32.1            | cell communication                          | ---                          | -1.15         | -1.11           | 1.20      | 1.38        | 1.35      | 1.10        | 1.69       | 1.36         | 1.68       | 1.86         | 2.38       | 3.80         |
| PHLN1            | periplakin 1                               | chr12q12             | keratinization                              | ---                          | 1.21          | 1.23            | -1.04     | -1.16       | -1.13     | -1.13       | -1.50      | -1.34        | -1.71      | -2.15        | -1.63      | -2.10        |
| PHLN1            | periplakin 1                               | chr12q12             | keratinization                              | ---                          | -1.01         | 1.05            | 1.11      | 1.10        | 1.01      | 1.15        | -1.10      | -1.04        | -1.20      | -1.07        | -1.12      | -1.34        |
| PHLN1            | periplakin 1                               | chr12q12             | keratinization                              | ---                          | 1.26          | 1.19            | 1.19      | -1.02       | -1.33     | -1.24       | -1.05      | 1.01         | -1.65      | -1.52        | -1.11      | -1.13        |
| PPID             | peptidylprolyl isomerase D                 | chr4q31.3            | negative regulation of transcription from   | ---                          | 1.11          | 1.08            | -1.04     | 1.04        | -1.09     | 1.05        | -1.11      | -1.09        | 1.01       | -1.02        | -1.04      | -1.15        |
| PPIE             | peptidylprolyl isomerase E                 | chr1p32              | mRNA splicing, via spliceosome              | ---                          | 1.04          | -1.04           | -1.04     | 1.14        | -1.13     | -1.27       | 1.10       | 1.18         | 1.06       | 1.03         | -1.39      | -1.25        |
| PPIE             | peptidylprolyl isomerase E                 | chr1p32              | mRNA splicing, via spliceosome              | ---                          | -1.12         | -1.18           | 1.04      | 1.05        | 1.10      | -1.02       | 1.16       | 1.06         | 1.30       | 1.17         | 1.21       | 1.37         |
| PPIE             | peptidylprolyl isomerase E                 | chr1p32              | mRNA splicing, via spliceosome              | ---                          | -1.06         | -1.13           | 1.02      | 1.08        | 1.01      | -1.03       | 1.26       | 1.24         | 1.45       | 1.29         | 1.34       | 1.46         |
| PIIG             | peptidylprolyl isomerase G                 | chr2q31.1            | protein peptidyl-prolyl isomerization       | ---                          | -1.10         | -1.23           | -1.01     | 1.12        | -1.03     | -1.06       | 1.16       | 1.17         | 1.29       | 1.33         | 1.31       | 1.52         |
| PIIG             | peptidylprolyl isomerase G                 | chr2q31.1            | protein peptidyl-prolyl isomerization       | ---                          | -1.03         | -1.03           | -1.05     | -1.02       | 1.02      | 1.01        | 1.05       | 1.02         | 1.17       | 1.18         | 1.10       | 1.12         |
| PPII1            | peptidylprolyl isomerase (cyclophilin)     | chr6p21.1            | mRNA splicing, via spliceosome              | ---                          | -1.01         | -1.02           | 1.01      | 1.11        | 1.02      | 1.06        | -1.07      | -1.04        | -1.01      | -1.03        | 1.02       | 1.15         |
| PPII2            | peptidylprolyl isomerase (cyclophilin)     | chr22q11.21          | protein polyubiquitination                  | ---                          | 1.09          | 1.32            | -1.12     | 1.05        | -1.11     | -1.12       | -1.12      | -1.07        | -1.51      | -1.64        | -1.54      | -2.04        |
| PPII2            | peptidylprolyl isomerase (cyclophilin)     | chr22q11.21          | protein polyubiquitination                  | ---                          | 1.09          | 1.35            | -1.16     | -1.12       | 1.11      | 1.16        | -1.34      | -1.18        | -1.46      | -1.37        | -1.37      | -1.76        |
| PPII2            | peptidylprolyl isomerase (cyclophilin)     | chr22q11.21          | protein polyubiquitination                  | ---                          | 1.21          | 1.15            | -1.09     | -1.24       | -1.26     | -1.28       | 1.22       | 1.11         | -1.16      | -1.07        | -2.02      | -1.98        |
| PPII2            | peptidylprolyl isomerase (cyclophilin)     | chr22q11.21          | protein polyubiquitination                  | ---                          | -1.13         | -1.05           | 1.24      | 1.23        | 1.10      | -1.24       | 1.06       | 1.21         | -1.34      | -1.49        | -2.03      | -1.76        |

| ID         | Gene Title                  | Chromosomal Location | 1st Gene Ontology Biological Process       | Pathway                                   | A2497 30 mins | A2497P' 30 mins | A2497 2 h | A2497P' 2 h | A2497 4 h | A2497P' 4 h | A2497 24 h | A2497P' 24 h | A2497 48 h | A2497P' 48 h | A2497 72 h | A2497P' 72 h |
|------------|-----------------------------|----------------------|--------------------------------------------|-------------------------------------------|---------------|-----------------|-----------|-------------|-----------|-------------|------------|--------------|------------|--------------|------------|--------------|
| PPIL3      | peptidylprolyl isomerase (c | chr2q33.1            | mRNA splicing, via spliceosome             | ---                                       | 1.12          | 1.09            | -1.04     | -1.06       | -1.01     | 1.04        | -1.11      | -1.12        | 1.14       | 1.19         | 1.40       | 1.27         |
| PPIL4      | peptidylprolyl isomerase (c | chr6q25.1            | protein peptidyl-prolyl isomerization      | ---                                       | 1.12          | 1.05            | -1.02     | -1.04       | 1.11      | 1.22        | -1.04      | -1.10        | 1.10       | -1.03        | 1.32       | 1.15         |
| PPIL6      | peptidylprolyl isomerase (c | chr6q21              | protein peptidyl-prolyl isomerization      | ---                                       | 1.05          | 1.04            | -1.52     | 1.10        | -1.45     | 1.32        | -1.11      | -1.27        | 1.69       | 1.66         | 1.32       | 1.25         |
| PPIP5K1    | diphosphoinositol pentakis  | chr15q15.3           | inositol metabolic process                 | ---                                       | 1.14          | 1.05            | 1.07      | 1.18        | -1.07     | -1.04       | 1.08       | 1.06         | -1.18      | -1.08        | -1.56      | -1.41        |
| PPIP5K1    | diphosphoinositol pentakis  | chr15q15.3           | inositol metabolic process                 | ---                                       | -1.02         | 1.01            | 1.10      | 1.12        | 1.19      | 1.03        | 1.02       | 1.05         | -1.21      | -1.02        | -1.56      | -1.38        |
| PPIP5K2    | diphosphoinositol pentakis  | chr5q21.1            | inositol metabolic process                 | ---                                       | 1.17          | 1.09            | 1.05      | -1.06       | -1.07     | 1.22        | -1.23      | -1.09        | -1.85      | -1.41        | -1.40      | -1.50        |
| PPM1A      | protein phosphatase, Mg2+   | chr14q23.1           | negative regulation of transcription from  | ---                                       | -1.08         | -1.07           | 1.22      | 1.13        | 1.05      | 1.02        | -1.78      | -1.62        | -1.98      | -1.73        | -2.41      | -2.74        |
| PPM1B      | protein phosphatase, Mg2+   | chr2p21              | protein dephosphorylation                  | ---                                       | 1.50          | 1.01            | 1.00      | 1.06        | 1.17      | 1.41        | -1.67      | -1.36        | -1.55      | -1.14        | -1.17      | -2.89        |
| PPM1D      | protein phosphatase, Mg2+   | chr17q23.2           | G2                                         | ---                                       | 1.04          | 1.04            | 1.07      | -1.04       | -1.15     | 1.07        | -1.15      | -1.02        | -1.81      | -1.55        | -1.23      | -1.53        |
| PPM1E      | protein phosphatase, Mg2+   | chr17q22             | negative regulation of protein kinase acti | ---                                       | 2.02          | -1.11           | 1.24      | 1.43        | -1.16     | 1.01        | -1.39      | 1.25         | 1.35       | 1.63         | 1.19       | 2.03         |
| PPM1F      | protein phosphatase, Mg2+   | chr22q11.22          | negative regulation of protein kinase acti | ---                                       | 1.03          | 1.08            | 1.07      | 1.21        | -1.01     | -1.03       | 1.32       | 1.31         | 1.74       | 1.42         | 1.11       | 1.40         |
| PPM1F      | protein phosphatase, Mg2+   | chr22q11.22          | negative regulation of protein kinase acti | ---                                       | -1.01         | 1.01            | -1.02     | 1.15        | 1.15      | 1.02        | 1.32       | 1.26         | 1.85       | 1.46         | 1.24       | 1.47         |
| PPM1H      | protein phosphatase, Mg2+   | chr12q14.1           | metabolic process                          | ---                                       | 1.22          | 1.02            | 1.14      | -1.00       | -1.31     | -1.12       | 1.19       | 1.14         | -1.47      | -1.61        | -1.28      | -1.31        |
| PPM1J      | protein phosphatase, Mg2+   | chr1p13.2            | protein dephosphorylation                  | ---                                       | -1.51         | -1.97           | -1.15     | 1.60        | -1.46     | -1.69       | 1.04       | 1.36         | 1.66       | 1.04         | 5.33       | 5.50         |
| PPM1K      | protein phosphatase, Mg2+   | chr4q22.1            | protein dephosphorylation                  | ---                                       | -1.15         | 1.02            | -1.01     | 1.02        | 1.41      | 1.22        | 1.13       | 1.09         | 1.08       | 1.22         | 1.16       | 1.03         |
| PPM1K      | protein phosphatase, Mg2+   | chr4q22.1            | protein dephosphorylation                  | ---                                       | 1.28          | 2.08            | 3.04      | 3.82        | 1.64      | -1.68       | 1.68       | 1.93         | 4.11       | 3.20         | 1.27       | 1.54         |
| PPM1K      | protein phosphatase, Mg2+   | chr4q22.1            | protein dephosphorylation                  | ---                                       | 1.26          | 1.28            | -1.09     | -1.07       | 1.07      | 1.91        | 1.59       | 1.69         | 1.26       | 1.66         | 1.33       | 1.12         |
| PPM1L      | protein phosphatase, Mg2+   | chr3q26.1            | MAPK cascade                               | ---                                       | 1.01          | -1.16           | 1.09      | 1.23        | 1.13      | 1.24        | -1.20      | -1.19        | -1.86      | -2.07        | -2.60      | -3.35        |
| PPM1M      | protein phosphatase, Mg2+   | chr3p21.2            | protein dephosphorylation                  | ---                                       | 1.06          | -1.11           | 1.15      | 1.20        | 1.18      | -1.07       | 1.16       | 1.17         | 1.34       | 1.31         | 1.07       | 1.35         |
| PPPICB     | protein phosphatase 1, cata | chr2p23              | G2                                         | G13_Signaling_Pathway // GenMAPP // G1    | 1.10          | 1.12            | 1.01      | -1.05       | 1.01      | 1.00        | -1.24      | -1.14        | -1.15      | -1.04        | -1.34      | -1.43        |
| PPPICB     | protein phosphatase 1, cata | chr12q24.1-q24.2     | M phase of mitotic cell cycle              | ---                                       | -1.02         | 1.10            | -1.00     | -1.03       | 1.10      | 1.03        | 1.07       | -1.01        | -1.09      | -1.06        | -1.05      | -1.18        |
| PPPIR10    | protein phosphatase 1, regu | chr6p21.3            | transcription, DNA-dependent               | ---                                       | 1.08          | 1.22            | -1.07     | -1.20       | 1.04      | 1.03        | -1.61      | -1.19        | -1.79      | -2.33        | 1.03       | -1.32        |
| PPPIR10    | protein phosphatase 1, regu | chr6p21.3            | transcription, DNA-dependent               | ---                                       | -1.12         | -1.05           | 1.00      | -1.22       | 1.17      | 1.03        | -1.62      | -1.31        | -1.60      | -2.37        | 1.04       | -1.20        |
| PPPIR12C   | protein phosphatase 1, regu | chr19q13.42          | 0                                          | ---                                       | -1.97         | 2.05            | -1.13     | -1.78       | 1.71      | -2.16       | -2.79      | -1.09        | 1.10       | 2.38         | -1.17      | -5.31        |
| PPPIR13L   | protein phosphatase 1, regu | chr19q13.32          | negative regulation of transcription from  | ---                                       | 1.12          | 1.03            | 1.16      | 1.20        | 1.02      | -1.00       | 1.38       | 1.33         | 1.54       | 1.33         | 1.70       | 1.85         |
| PPPIR14B   | protein phosphatase 1, regu | chr11q13             | regulation of phosphorylation              | ---                                       | 1.09          | 1.09            | 1.01      | 1.04        | -1.03     | -1.12       | 1.23       | 1.14         | 1.59       | 1.30         | 1.11       | 1.14         |
| PPPIR14C   | protein phosphatase 1, regu | chr6q24.3-q25.3      | regulation of phosphorylation              | ---                                       | 1.27          | -1.50           | -1.15     | -1.03       | -1.14     | -1.53       | 1.18       | -1.13        | 4.20       | 2.19         | -4.11      | -1.73        |
| PPPIR15A   | protein phosphatase 1, regu | chr19q13.2           | regulation of translation                  | ---                                       | 1.21          | 1.06            | -1.10     | -1.14       | -1.08     | -1.26       | 2.01       | 1.35         | 4.22       | 2.26         | 3.90       | 2.35         |
| PPPIR15A   | protein phosphatase 1, regu | chr19q13.2           | regulation of translation                  | ---                                       | 1.07          | 1.09            | -1.01     | -1.01       | 1.09      | 1.08        | 2.14       | 1.52         | 2.73       | 1.61         | 3.62       | 2.44         |
| PPPIR17    | protein phosphatase 1, regu | chr7p15              | protein phosphorylation                    | ---                                       | -1.79         | -1.22           | -1.37     | -1.69       | 1.12      | 1.13        | 1.02       | -1.17        | 1.70       | 1.69         | 2.60       | 2.65         |
| PPPIR18    | protein phosphatase 1, regu | chr6p21.3            | 0                                          | ---                                       | 1.09          | 1.11            | -1.13     | -1.08       | 1.14      | 1.11        | 1.04       | -1.00        | 1.70       | 1.61         | 1.73       | 1.73         |
| PPPIR21    | protein phosphatase 1, regu | chr2p16.3            | oxidation-reduction process                | ---                                       | 1.35          | 1.04            | 1.00      | 1.03        | -1.32     | -1.13       | 1.20       | 1.06         | -1.81      | -1.89        | -2.18      | -1.80        |
| PPPIR26    | protein phosphatase 1, regu | chr9q34.3            | negative regulation of phosphatase activi  | ---                                       | -1.11         | -1.14           | 1.02      | 1.01        | 1.05      | -1.11       | 1.31       | 1.31         | 1.55       | 1.36         | 1.26       | 1.34         |
| PPPIR26-AS | PPPIR26 antisense RNA 1     | ---                  | 0                                          | ---                                       | 1.15          | -1.01           | -1.06     | 1.09        | -1.00     | 1.11        | -1.24      | -1.11        | 1.48       | 1.19         | 1.38       | 1.58         |
| PPPIR32    | protein phosphatase 1, regu | chr11q12.2           | 0                                          | ---                                       | 5.94          | 5.81            | 2.17      | 1.52        | 1.84      | 1.94        | 1.29       | -1.34        | 1.74       | 1.30         | -1.34      | 1.22         |
| PPPIR35    | protein phosphatase 1, regu | chr7q22.1            | negative regulation of phosphatase activi  | ---                                       | -1.06         | -1.02           | -1.14     | -1.10       | -1.05     | -1.05       | 1.26       | 1.15         | 1.36       | 1.20         | 1.63       | 1.34         |
| PPPIR3B    | protein phosphatase 1, regu | chr8p23.1            | carbohydrate metabolic process             | ---                                       | 1.29          | 1.56            | 1.12      | 1.26        | -1.08     | 1.19        | 1.04       | -1.25        | 1.34       | 1.96         | 2.46       | 2.26         |
| PPPIR3B    | protein phosphatase 1, regu | chr8p23.1            | carbohydrate metabolic process             | ---                                       | -1.16         | 1.41            | 1.10      | -1.19       | -2.25     | -1.59       | -1.01      | -1.18        | 1.67       | 2.21         | 2.44       | 2.65         |
| PPPIR3C    | protein phosphatase 1, regu | chr10q23-q24         | carbohydrate metabolic process             | ---                                       | -1.40         | -1.40           | -1.07     | -1.14       | 1.06      | -1.35       | 1.20       | 1.02         | -2.80      | -1.67        | -2.72      | -1.32        |
| PPPIR3C    | protein phosphatase 1, regu | chr10q23-q24         | carbohydrate metabolic process             | ---                                       | 1.04          | 1.06            | -1.00     | -1.17       | 1.09      | -1.02       | 1.05       | -1.07        | -1.45      | 1.03         | -1.55      | -1.33        |
| PPPIR3D    | protein phosphatase 1, regu | chr20q13.3           | carbohydrate metabolic process             | ---                                       | -1.11         | 1.02            | -1.05     | -1.00       | 1.06      | -1.00       | -1.26      | -1.04        | -1.63      | -1.44        | -1.20      | -1.24        |
| PPPIR3E    | protein phosphatase 1, regu | chr14q11.2           | carbohydrate metabolic process             | ---                                       | -1.04         | -1.12           | -1.00     | 1.45        | 1.05      | 1.07        | -1.06      | -1.01        | -1.22      | -1.08        | -1.74      | -1.24        |
| PPPIR3E    | protein phosphatase 1, regu | chr14q11.2           | glycogen metabolic process                 | ---                                       | 1.07          | -1.10           | 1.41      | 1.72        | 1.19      | 1.16        | 1.26       | -1.01        | -1.71      | -1.89        | -3.24      | -2.30        |
| PPPIR3E    | protein phosphatase 1, regu | chr14q11.2           | carbohydrate metabolic process             | ---                                       | 1.20          | 1.12            | 1.10      | 1.20        | -1.02     | -1.02       | 1.16       | 1.11         | -1.41      | -1.25        | -2.74      | -2.09        |
| PPPIR3F    | protein phosphatase 1, regu | chrXp11.23           | regulation of glycogen biosynthetic proce  | ---                                       | 1.81          | 1.06            | 1.14      | 1.58        | 1.12      | 1.38        | -3.96      | -1.31        | 1.34       | -1.08        | 2.23       | 2.76         |
| PPPIR7     | protein phosphatase 1, regu | chr2q37.3            | regulation of catalytic activity           | ---                                       | -1.21         | 1.01            | 1.11      | 1.15        | 1.03      | 1.01        | -1.14      | -1.07        | -1.90      | -1.70        | -1.31      | 1.31         |
| PPPIR7     | protein phosphatase 1, regu | chr2q37.3            | regulation of catalytic activity           | ---                                       | -1.12         | -1.11           | 1.01      | 1.05        | 1.06      | -1.07       | 1.29       | 1.28         | 1.29       | 1.12         | 1.12       | 1.38         |
| PPPIR9A    | protein phosphatase 1, regu | chr7q21.3            | induction of apoptosis                     | ---                                       | -1.06         | 1.07            | 1.00      | -1.04       | 1.03      | -1.10       | -1.18      | 1.25         | -2.15      | -1.24        | -2.14      | -1.70        |
| PPPIR9A    | protein phosphatase 1, regu | chr7q21.3            | induction of apoptosis                     | ---                                       | -1.02         | -1.06           | 1.16      | 1.15        | 1.39      | 1.07        | -1.05      | -1.06        | -1.43      | -1.16        | -2.44      | -1.90        |
| PPPIR9A    | protein phosphatase 1, regu | chr7q21.3            | induction of apoptosis                     | ---                                       | 1.00          | -1.03           | 1.18      | 1.45        | 1.30      | 1.48        | 1.19       | 1.07         | -1.32      | 1.06         | -2.10      | -1.50        |
| PPPIR9A    | protein phosphatase 1, regu | chr7q21.3            | induction of apoptosis                     | ---                                       | 1.15          | 1.09            | 1.07      | 1.05        | -1.06     | 1.16        | -1.14      | -1.11        | -2.18      | -1.47        | -2.09      | -2.31        |
| PP22CA     | protein phosphatase 2, cata | chr5q31.1            | nuclear-transcribed mRNA catabolic pro     | ---                                       | 1.09          | 1.11            | 1.00      | -1.05       | -1.12     | -1.01       | -1.29      | -1.11        | -1.16      | -1.17        | -1.41      | -1.24        |
| PP22CB     | protein phosphatase 2, cata | chr8p12              | protein dephosphorylation                  | Circadian_Exercise // GenMAPP /// Glycoge | 1.03          | 1.08            | -1.01     | -1.00       | 1.00      | 1.02        | -1.00      | -1.04        | 1.28       | 1.25         | 1.22       | 1.12         |
| PP22R1B    | protein phosphatase 2, regu | chr11q23.2           | positive regulation of extrinsic apoptotic | Glycogen_Metabolism // GenMAPP            | 1.05          | -1.02           | -1.11     | 1.05        | 1.12      | 1.06        | -1.06      | 1.19         | 1.44       | 1.28         | 1.53       | 1.90         |
| PP22R1B    | protein phosphatase 2, regu | chr11q23.2           | positive regulation of extrinsic apoptotic | Glycogen_Metabolism // GenMAPP            | -1.00         | 1.03            | -1.05     | -1.09       | -1.09     | -1.05       | -1.48      | -1.16        | -1.83      | -1.63        | -1.66      | -1.67        |
| PP22R1B    | protein phosphatase 2, regu | chr11q23.2           | positive regulation of extrinsic apoptotic | Glycogen_Metabolism // GenMAPP            | -1.77         | -1.69           | 1.09      | 1.27        | 1.19      | 1.19        | 1.38       | 1.37         | 1.55       | 1.14         | 1.64       | 2.21         |
| PP22R2A    | protein phosphatase 2, regu | chr8p21.2            | nuclear-transcribed mRNA catabolic pro     | Glycogen_Metabolism // GenMAPP            | 1.12          | 1.02            | 1.04      | 1.04        | 1.02      | 1.06        | 1.05       | -1.03        | 1.30       | 1.37         | 1.70       | 1.66         |
| PP22R2A    | protein phosphatase 2, regu | chr8p21.2            | nuclear-transcribed mRNA catabolic pro     | Glycogen_Metabolism // GenMAPP            | -1.32         | -2.37           | -2.27     | -1.57       | 5.82      | 1.39        | -1.65      | 1.33         | 3.79       | 5.06         | 2.24       | -1.82        |
| PP22R2B    | protein phosphatase 2, regu | chr5q32              | mitochondrial fission                      | Glycogen_Metabolism // GenMAPP            | 1.11          | 1.13            | -1.01     | -1.01       | -1.14     | -1.09       | -1.34      | -1.16        | -2.97      | -2.23        | -3.52      | -3.34        |
| PP22R2C    | protein phosphatase 2, regu | chr4p16.1            | signal transduction                        | Glycogen_Metabolism // GenMAPP            | 1.04          | 1.18            | 1.58      | 1.30        | -1.46     | -1.18       | 1.37       | 1.42         | 1.42       | 1.84         | 2.16       | 1.58         |
| PP22R2D    | protein phosphatase 2, regu | chr10q26.3           | mitotic cell cycle                         | ---                                       | -1.13         | -1.15           | -1.03     | 1.08        | 1.07      | -1.06       | 1.22       | 1.06         | 1.07       | -1.01        | 1.13       | 1.23         |
| PP22R3A    | protein phosphatase 2, regu | chr3q22.1            | eye photoreceptor cell differentiation     | Glycogen_Metabolism // GenMAPP            | 1.06          | -1.04           | -1.02     | -1.01       | 1.08      | 1.35        | -1.13      | -1.09        | -2.07      | -1.68        | -2.33      | -2.35        |
| PP22R3A    | protein phosphatase 2, regu | chr3q22.1            | eye photoreceptor cell differentiation     | Glycogen_Metabolism // GenMAPP            | -1.16         | -1.13           | 1.02      | -1.07       | 1.13      | 1.10        | -1.40      | -1.05        | -1.99      | -1.41        | -1.98      | -2.16        |
| PP22R5B    | protein phosphatase 2, regu | chr11q12             | regulation of protein phosphorylation      | Glycogen_Metabolism // GenMAPP            | 1.12          | -1.01           | -1.02     | 1.02        | -1.06     | 1.02        | 1.26       | 1.03         | 2.09       | 2.05         | 1.46       | 1.77         |
| PP22R5B    | protein phosphatase 2, regu | chr11q12             | regulation of protein phosphorylation      | Glycogen_Metabolism // GenMAPP            | -2.05         | -1.77           | -1.21     | -1.00       | 1.05      | 1.37        | 1.84       | 1.38         | 2.52       | 2.56         | 2.17       | 1.37         |
| PP22R5C    | protein phosphatase 2, regu | chr14q32.31          | DNA damage response, signal transduct      | Glycogen_Metabolism // GenMAPP /// Wnt    | 1.30          | 1.57            | 1.13      | -1.20       | 1.06      | 1.15        | 1.93       | 1.50         | 6.13       | 5.36         | 8.45       | 5.74         |

| ID            | Gene Title                                                 | Chromosomal Location | 1st Gene Ontology Biological Process         | Pathway                                        | A2497 30 mins | A2497P' 30 mins | A2497 2 h | A2497P' 2 h | A2497 4 h | A2497P' 4 h | A2497 24 h | A2497P' 24 h | A2497 48 h | A2497P' 48 h | A2497 72 h | A2497P' 72 h |
|---------------|------------------------------------------------------------|----------------------|----------------------------------------------|------------------------------------------------|---------------|-----------------|-----------|-------------|-----------|-------------|------------|--------------|------------|--------------|------------|--------------|
| PPP2R5C       | protein phosphatase 2, regulatory subunit 5C               | chr14q32.31          | DNA damage response, signal transduction     | Glycogen_Metabolism // GenMAPP // Wnt          | -1.03         | -1.03           | -1.09     | -1.05       | -1.00     | -1.05       | 1.06       | 1.10         | 1.42       | 1.41         | 1.47       | 1.55         |
| PPP2R5C       | protein phosphatase 2, regulatory subunit 5C               | chr14q32.31          | DNA damage response, signal transduction     | Glycogen_Metabolism // GenMAPP // Wnt          | 1.01          | 1.09            | 1.00      | -1.20       | 1.04      | -1.08       | 1.11       | 1.06         | 1.12       | 1.37         | 1.72       | 1.63         |
| PPP2R5C       | protein phosphatase 2, regulatory subunit 5C               | chr14q32.31          | DNA damage response, signal transduction     | Glycogen_Metabolism // GenMAPP // Wnt          | 1.01          | -1.00           | 1.03      | 1.05        | 1.01      | 1.06        | 1.01       | 1.06         | 1.37       | 1.47         | 1.59       | 1.52         |
| PPP2R5C       | protein phosphatase 2, regulatory subunit 5C               | chr14q32.31          | DNA damage response, signal transduction     | Glycogen_Metabolism // GenMAPP // Wnt          | 1.04          | 1.01            | 1.00      | 1.03        | -1.01     | 1.11        | -1.54      | -1.19        | -1.06      | 1.04         | 1.02       | 1.05         |
| PPP3CB        | protein phosphatase 3, catalytic subunit B                 | chr10q22.2           | G1                                           | ---                                            | -1.00         | -1.04           | -1.06     | -1.13       | 1.07      | 1.11        | 1.05       | -1.01        | -1.34      | -1.20        | -1.83      | -1.63        |
| PPP3CB        | protein phosphatase 3, catalytic subunit B                 | chr10q22.2           | G1                                           | ---                                            | -1.01         | -1.14           | -1.07     | 1.08        | -1.09     | -1.01       | 1.07       | 1.09         | -1.19      | -1.13        | -1.31      | -1.22        |
| PPP3CC        | protein phosphatase 3, catalytic subunit C                 | chr8p21.3            | apoptotic process                            | G_Protein_Signaling // GenMAPP                 | 1.21          | 1.28            | -1.07     | -1.05       | -1.16     | -1.15       | 1.33       | 1.26         | 1.55       | 1.55         | 1.91       | 1.19         |
| PPP3CC        | protein phosphatase 3, catalytic subunit C                 | chr8p21.3            | apoptotic process                            | G_Protein_Signaling // GenMAPP                 | 1.22          | 1.22            | 1.27      | 1.08        | -1.02     | -1.13       | 1.20       | 1.40         | 1.32       | 1.13         | 1.28       | -1.03        |
| PPP3CC        | protein phosphatase 3, catalytic subunit C                 | chr8p21.3            | apoptotic process                            | G_Protein_Signaling // GenMAPP                 | 1.28          | 1.32            | 1.09      | 1.01        | -1.07     | -1.14       | 1.21       | 1.36         | 1.09       | -1.05        | 1.75       | 1.33         |
| PPP3CC        | protein phosphatase 3, catalytic subunit C                 | chr8p21.3            | apoptotic process                            | G_Protein_Signaling // GenMAPP                 | 1.55          | 1.23            | 1.21      | 1.15        | 1.75      | 1.38        | 1.29       | 1.67         | 2.51       | 2.28         | 3.85       | 2.99         |
| PPP4R1        | protein phosphatase 4, regulatory subunit 1                | chr18p11.22          | protein phosphorylation                      | ---                                            | 1.01          | -1.02           | 1.02      | 1.02        | -1.01     | -1.01       | -1.05      | 1.06         | -1.33      | -1.29        | -1.32      | -1.26        |
| PPP4R1L       | protein phosphatase 4, regulatory subunit 1L               | chr20q13.32          | 0                                            | ---                                            | 1.08          | -1.45           | -1.03     | -1.45       | 2.14      | 1.29        | -1.05      | -1.03        | 1.68       | 1.86         | 1.51       | 1.13         |
| PPP4R1L       | protein phosphatase 4, regulatory subunit 1L               | chr20q13.32          | 0                                            | ---                                            | 1.51          | 2.06            | 1.02      | 1.62        | 1.04      | 1.01        | 1.47       | 1.07         | -1.87      | 1.40         | 1.09       | 1.08         |
| PPP4R2        | protein phosphatase 4, regulatory subunit 2                | chr3p13              | mRNA processing                              | ---                                            | 1.14          | 1.14            | 1.02      | -1.05       | -1.00     | 1.05        | -1.12      | -1.06        | -1.43      | -1.29        | -1.05      | -1.27        |
| PPP4R2        | protein phosphatase 4, regulatory subunit 2                | chr3p13              | mRNA processing                              | ---                                            | 1.03          | 1.06            | -1.22     | 1.04        | 1.22      | 1.06        | 1.20       | 1.27         | 1.75       | 1.75         | 1.05       | -1.02        |
| PPP6C         | protein phosphatase 6, catalytic subunit                   | chr9q33.3            | G1                                           | ---                                            | 1.02          | 1.07            | -1.02     | -1.06       | -1.05     | 1.00        | -1.13      | -1.04        | 1.19       | 1.25         | 1.49       | 1.39         |
| PPP6C         | protein phosphatase 6, catalytic subunit                   | chr9q33.3            | G1                                           | ---                                            | 1.12          | 1.16            | 1.05      | -1.05       | -1.07     | 1.06        | -1.15      | -1.08        | -1.46      | -1.35        | -1.35      | -1.55        |
| PPP6C         | protein phosphatase 6, catalytic subunit                   | chr9q33.3            | G1                                           | ---                                            | 1.12          | 1.14            | 1.18      | 1.05        | -1.06     | -1.01       | 1.09       | -1.02        | -1.45      | -1.25        | -1.21      | -1.30        |
| PPP6R3        | protein phosphatase 6, regulatory subunit 3                | chr11q13             | regulation of phosphoprotein phosphatase     | ---                                            | 1.08          | 1.12            | 1.02      | -1.04       | 1.00      | -1.07       | -1.06      | -1.05        | -1.57      | -1.50        | -1.14      | -1.51        |
| PPP6R3        | protein phosphatase 6, regulatory subunit 3                | chr11q13             | regulation of phosphoprotein phosphatase     | ---                                            | -1.01         | -1.01           | 1.01      | -1.09       | 1.03      | 1.02        | 1.01       | -1.02        | -1.31      | -1.49        | -1.06      | -1.16        |
| PPRC1         | peroxisome proliferator-activated receptor coactivator 1   | chr10q24.32          | transcription, DNA-dependent                 | ---                                            | 1.07          | 1.03            | 1.03      | 1.24        | 1.04      | -1.02       | 1.20       | 1.19         | 1.10       | -1.11        | 1.37       | 1.39         |
| PQBP1         | polyglutamine binding protein 1                            | chrXp11.23           | transcription, DNA-dependent                 | ---                                            | 1.20          | -1.21           | 1.09      | 1.18        | 1.28      | 1.11        | 1.11       | 1.08         | -1.43      | -1.35        | -1.79      | -1.30        |
| PQLC3         | PQ loop repeat containing 3                                | chr2p25.1            | 0                                            | ---                                            | 1.51          | -1.58           | -2.05     | 2.23        | -1.99     | -1.74       | 1.04       | 1.24         | 4.60       | 3.26         | 1.41       | 1.64         |
| PQLC3         | PQ loop repeat containing 3                                | chr2p25.1            | 0                                            | ---                                            | 1.14          | -1.04           | 1.06      | 1.39        | 1.25      | -1.14       | 1.12       | 1.03         | -1.02      | 1.24         | 1.86       | 1.89         |
| PRADC1        | protease-associated domain containing 1                    | chr2p13.2            | 0                                            | ---                                            | 1.04          | -1.10           | 1.05      | 1.14        | -1.17     | -1.21       | 1.22       | 1.06         | 1.18       | 1.30         | 1.43       | 1.71         |
| PRCD          | progressive rod-cone degeneration 1                        | chr17q25.1           | visual perception                            | ---                                            | -1.19         | -2.20           | -1.22     | 1.15        | 2.25      | -1.07       | -1.32      | -1.13        | 6.05       | 7.10         | 2.43       | 1.89         |
| PRDM1         | PR domain containing 1, w                                  | chr6q21              | negative regulation of transcription from    | ---                                            | 1.30          | 1.30            | -1.34     | -1.53       | -1.58     | -1.20       | 1.12       | 1.11         | 2.06       | 2.16         | 1.26       | 1.36         |
| PRDM10        | PR domain containing 10                                    | chr11q25             | transcription, DNA-dependent                 | ---                                            | 1.06          | 1.12            | 1.18      | 1.02        | 1.03      | -1.01       | 1.06       | -1.19        | -1.03      | 1.08         | 1.40       | 1.34         |
| PRDM13        | PR domain containing 13                                    | chr6q16.2            | transcription, DNA-dependent                 | ---                                            | 1.16          | 1.10            | -1.16     | -1.09       | -1.01     | 1.12        | -1.40      | -1.16        | -2.26      | -1.62        | -1.70      | -1.66        |
| PRDM15        | PR domain containing 15                                    | chr21q22.3           | transcription, DNA-dependent                 | ---                                            | -1.04         | -1.10           | -1.09     | 1.12        | 1.09      | 1.08        | 1.18       | 1.23         | -1.19      | -1.23        | -1.11      | -1.02        |
| PRDM2         | PR domain containing 2, w                                  | chr1p36.21           | transcription, DNA-dependent                 | ---                                            | -1.04         | -1.05           | 1.33      | 1.27        | 1.05      | 1.23        | -1.01      | 1.10         | 1.06       | -1.04        | -1.19      | -1.23        |
| PRDM4         | PR domain containing 4                                     | chr12q23-q24.1       | transcription, DNA-dependent                 | ---                                            | -1.03         | -1.11           | 1.00      | -1.03       | 1.03      | 1.07        | -1.07      | -1.07        | 1.06       | 1.02         | 1.31       | 1.31         |
| PRDM4         | PR domain containing 4                                     | chr12q23-q24.1       | transcription, DNA-dependent                 | ---                                            | -1.05         | -1.10           | 1.04      | 1.09        | 1.01      | 1.03        | -1.02      | -1.02        | 1.05       | -1.07        | 1.23       | 1.31         |
| PRDM5         | PR domain containing 5                                     | chr4q25-q26          | mitotic cell cycle                           | ---                                            | 1.31          | 1.09            | -1.11     | 1.04        | 1.62      | 1.86        | -1.50      | 1.06         | -1.63      | -1.34        | -1.26      | -1.52        |
| PRDM5         | PR domain containing 5                                     | chr4q25-q26          | mitotic cell cycle                           | ---                                            | -1.42         | -2.27           | -1.55     | 2.36        | -2.35     | -1.43       | 1.76       | 1.57         | 8.04       | -1.87        | -1.29      | ---          |
| PRDM6         | PR domain containing 6                                     | chr5q23.2            | transcription, DNA-dependent                 | ---                                            | -1.85         | -3.01           | -1.13     | -1.43       | 1.30      | -1.01       | 1.84       | 2.16         | -1.04      | 2.05         | 1.06       | -2.28        |
| PRDX2         | peroxiredoxin 2                                            | chr19p13.2           | response to oxidative stress                 | ---                                            | 1.09          | -1.00           | 1.10      | 1.19        | -1.08     | 1.23        | 1.18       | -1.01        | 1.41       | 1.22         | -1.27      | -1.37        |
| PRDX3         | peroxiredoxin 3                                            | chr10q25-q26         | maternal placenta development                | ---                                            | -1.03         | 1.07            | -1.01     | -1.12       | -1.01     | -1.02       | 1.02       | -1.04        | 1.18       | 1.00         | -1.08      | -1.19        |
| PRDX5         | peroxiredoxin 5                                            | chr11q13             | inflammatory response                        | ---                                            | -1.08         | -1.08           | -1.03     | -1.02       | 1.02      | -1.05       | 1.14       | 1.04         | 1.41       | 1.29         | 1.24       | 1.31         |
| PRDX5         | peroxiredoxin 5                                            | chr11q13             | inflammatory response                        | ---                                            | -1.01         | -1.01           | -1.04     | 1.04        | -1.12     | 1.03        | 1.07       | 1.04         | 1.21       | 1.21         | 1.18       | 1.25         |
| PRDX6         | peroxiredoxin 6                                            | chr1q25.1            | lipid metabolic process                      | ---                                            | -1.01         | -1.01           | -1.08     | -1.02       | -1.04     | -1.01       | 1.04       | -1.03        | 1.04       | 1.00         | -1.17      | -1.15        |
| PREB          | prolactin regulatory element containing 1                  | chr2p23.3            | transcription, DNA-dependent                 | ---                                            | -1.13         | -1.10           | -1.05     | 1.04        | -1.05     | -1.18       | -1.01      | 1.14         | 1.62       | 1.31         | 1.35       | 1.47         |
| PRELID1       | PREL domain containing 1                                   | chr5q35.3            | immune response                              | ---                                            | 1.01          | 1.05            | -1.03     | 1.07        | -1.04     | -1.11       | 1.20       | 1.11         | 1.67       | 1.27         | 1.19       | 1.14         |
| PRELID1       | PREL domain containing 1                                   | chr5q35.3            | immune response                              | ---                                            | -1.08         | -1.05           | -1.01     | -1.04       | 1.01      | 1.01        | -1.03      | 1.04         | 1.21       | 1.20         | 1.02       | 1.11         |
| PRELID2       | PREL domain containing 2                                   | chr5q32              | 0                                            | ---                                            | -1.13         | -1.25           | 1.09      | 1.32        | -1.01     | 1.09        | 1.39       | 1.21         | 1.65       | 1.73         | 1.65       | 1.94         |
| PRELP         | proline/arginine-rich end leucine-rich repeat containing 1 | chr1q32              | skeletal system development                  | ---                                            | 4.52          | 2.77            | 3.66      | 1.01        | 3.55      | 7.02        | 2.85       | 4.09         | 1.89       | 2.26         | 1.18       | 6.20         |
| PRELP         | proline/arginine-rich end leucine-rich repeat containing 1 | chr1q32              | skeletal system development                  | ---                                            | 1.01          | -2.11           | 1.32      | 1.64        | -2.19     | -1.08       | 3.67       | 1.72         | 2.85       | 4.76         | -1.21      | 1.38         |
| PREP          | prolyl endopeptidase                                       | chr6q22              | proteolysis                                  | ---                                            | 1.09          | 1.02            | 1.02      | -1.03       | -1.01     | 1.01        | -1.06      | -1.21        | -1.20      | -1.12        | 1.11       | 1.16         |
| PREPL         | prolyl endopeptidase-like                                  | chr2p21              | proteolysis                                  | ---                                            | 1.05          | -1.02           | 1.03      | -1.01       | -1.12     | 1.00        | 1.02       | -1.07        | -1.15      | 1.06         | 1.67       | 1.62         |
| PREPL         | prolyl endopeptidase-like                                  | chr2p21              | proteolysis                                  | ---                                            | 1.01          | 1.03            | 1.04      | 1.09        | -1.00     | -1.00       | 1.04       | -1.03        | 1.03       | 1.06         | 1.25       | 1.26         |
| PREX1         | phosphatidylinositol-3,4,5-trisphosphate 3-phosphatase     | chr20q13.13          | superoxide metabolic process                 | ---                                            | -1.23         | -1.17           | 1.04      | -1.13       | -1.14     | -1.13       | -1.41      | -1.03        | -1.78      | -1.27        | -1.36      | -1.27        |
| PREX1         | phosphatidylinositol-3,4,5-trisphosphate 3-phosphatase     | chr20q13.13          | superoxide metabolic process                 | ---                                            | 1.53          | 1.52            | -1.22     | -1.24       | -1.15     | -1.28       | -1.33      | 1.14         | -1.96      | -1.26        | -1.11      | -1.66        |
| PREX2         | phosphatidylinositol-3,4,5-trisphosphate 3-phosphatase     | chr8q13.2            | G-protein coupled receptor signaling pathway | ---                                            | 1.92          | 2.75            | 1.09      | -8.82       | 6.55      | 10.43       | 1.12       | -1.56        | 1.65       | 8.50         | 21.43      | 31.38        |
| PRG2          | proteoglycan 2, bone marrow                                | chr11q12             | immune response                              | ---                                            | 1.14          | -1.22           | 1.11      | 1.57        | 1.73      | 1.92        | 1.03       | 1.26         | 1.34       | 1.22         | 1.99       | 2.05         |
| PRG4          | proteoglycan 4                                             | chr1q25-q31          | immune response                              | ---                                            | -1.40         | -1.83           | -1.24     | -1.07       | 1.55      | 1.23        | -1.54      | 1.07         | 1.06       | 1.24         | -1.06      | 1.21         |
| PRH1 // PRH1L | proline-rich protein HaeIII                                | chr12p // chr12p13   | 0                                            | ---                                            | -1.05         | 1.00            | 2.16      | 1.78        | 1.00      | -1.20       | 1.38       | 1.21         | 1.35       | -1.09        | 1.06       | 1.66         |
| PRICKLE3      | prickle homolog 3 (Drosophila)                             | chrXp11.23           | 0                                            | ---                                            | -1.13         | -1.15           | 1.02      | 1.32        | 1.12      | -1.31       | 1.74       | 1.67         | 2.94       | 2.26         | 2.16       | 2.50         |
| PRICKLE4      | prickle homolog 4 (Drosophila)                             | chr6p21.1 // chr6p21 | protein targeting to mitochondrion           | ---                                            | -1.04         | 1.02            | -1.04     | -1.01       | 1.02      | -1.08       | 1.12       | 1.03         | 1.33       | 1.15         | 1.20       | 1.13         |
| PRIM1         | primase, DNA, polypeptide                                  | chr12q13             | G1                                           | DNA_replication_Reactome // GenMAPP            | -1.08         | -1.06           | -1.01     | 1.14        | 1.05      | -1.03       | 1.21       | 1.11         | -1.78      | -1.77        | -1.63      | -1.43        |
| PRIM2         | primase, DNA, polypeptide                                  | chr6p12-p11.1        | G1                                           | DNA_replication_Reactome // GenMAPP            | 1.18          | 1.10            | -1.04     | -1.04       | -1.06     | 1.12        | -1.13      | -1.15        | -1.57      | -1.33        | -1.24      | -1.40        |
| PRKAA1        | protein kinase, AMP-activated                              | chr5p12              | activation of MAPK activity                  | Fatty_Acid_Synthesis // GenMAPP                | 1.06          | 1.04            | 1.12      | 1.09        | -1.07     | -1.03       | 1.43       | 1.13         | 1.63       | 1.63         | 2.63       | 2.21         |
| PRKAA1        | protein kinase, AMP-activated                              | chr5p12              | activation of MAPK activity                  | Fatty_Acid_Synthesis // GenMAPP                | 1.43          | 1.29            | 1.12      | 1.02        | 1.13      | 1.25        | -1.03      | -1.12        | -2.50      | -2.46        | -2.60      | -3.46        |
| PRKAA2        | protein kinase, AMP-activated                              | chr5p12              | activation of MAPK activity                  | Fatty_Acid_Synthesis // GenMAPP                | -1.00         | 1.08            | -1.06     | -1.17       | -1.15     | -1.05       | -1.35      | -1.22        | -1.58      | -1.33        | -1.38      | -1.51        |
| PRKAA2        | protein kinase, AMP-activated                              | chr1p31              | energy reserve metabolic process             | Fatty_Acid_Synthesis // GenMAPP                | 1.05          | 1.06            | 1.02      | -1.24       | -1.16     | -1.18       | 1.07       | -1.31        | -1.17      | -1.25        | -1.38      | -1.04        |
| PRKAA2        | protein kinase, AMP-activated                              | chr1p31              | energy reserve metabolic process             | Fatty_Acid_Synthesis // GenMAPP                | 1.09          | 1.12            | 1.01      | 1.14        | -1.15     | -1.07       | -1.13      | 1.27         | -1.43      | -1.34        | -1.29      | -1.18        |
| PRKACA        | protein kinase, cAMP-dependent                             | chr19p13.1           | G2                                           | Calcium_regulation_in_cardiac_cells // GenMAPP | -1.05         | -1.04           | 1.04      | -1.06       | 1.07      | 1.06        | -1.06      | -1.04        | -1.15      | 1.02         | -1.34      | -1.16        |

| ID            | Gene Title                   | Chromosomal Location | 1st Gene Ontology Biological Process      | Pathway                                    | A2497 30 mins | A2497P' 30 mins | A2497 2 h | A2497P' 2 h | A2497 4 h | A2497P' 4 h | A2497 24 h | A2497P' 24 h | A2497 48 h | A2497P' 48 h | A2497 72 h | A2497P' 72 h |
|---------------|------------------------------|----------------------|-------------------------------------------|--------------------------------------------|---------------|-----------------|-----------|-------------|-----------|-------------|------------|--------------|------------|--------------|------------|--------------|
| PRKACB        | protein kinase, cAMP-depe    | chr1p31.1            | carbohydrate metabolic process            | Calcium_regulation_in_cardiac_cells // Gen | 1.06          | 1.09            | 1.02      | -1.03       | -1.04     | -1.01       | -1.07      | -1.01        | -1.25      | -1.19        | -1.58      | -1.91        |
| PRKACB        | protein kinase, cAMP-depe    | chr1p31.1            | carbohydrate metabolic process            | Calcium_regulation_in_cardiac_cells // Gen | 1.25          | 1.20            | 1.05      | 1.01        | -1.10     | -1.02       | -1.10      | -1.06        | -1.39      | -1.21        | -1.59      | -1.89        |
| PRKAG2        | protein kinase, AMP-activ    | chr7q36.1            | glycogen metabolic process                | Fatty_Acid_Synthesis // GenMAPP            | 1.04          | 1.00            | -1.08     | 1.20        | 1.05      | -1.10       | 1.26       | -1.22        | 1.64       | 1.95         | 1.37       | 1.32         |
| PRKAG2        | protein kinase, AMP-activ    | chr7q36.1            | glycogen metabolic process                | Fatty_Acid_Synthesis // GenMAPP            | -1.19         | -1.23           | 1.02      | -1.11       | -1.02     | -1.10       | 1.25       | 1.10         | 1.21       | 2.23         | 1.85       | 2.02         |
| PRKAG2-AS1    | PRKAG2 antisense RNA 1       | ---                  | ---                                       | ---                                        | -1.15         | -1.15           | -1.12     | -1.20       | 1.08      | -1.01       | -1.22      | -1.13        | -2.24      | -1.28        | -1.52      | -1.62        |
| PRKAG2-AS2    | PRKAG2 antisense RNA 2       | ---                  | ---                                       | ---                                        | 1.01          | -1.22           | -1.22     | -1.25       | 1.02      | -1.04       | -1.22      | 1.05         | -2.08      | -1.36        | -1.54      | -1.53        |
| PRKARIA       | protein kinase, cAMP-depe    | chr17q23-q24         | mesoderm formation                        | Calcium_regulation_in_cardiac_cells // Gen | -1.02         | 1.02            | 1.06      | -1.01       | 1.00      | -1.03       | 1.08       | 1.14         | 1.29       | 1.25         | 1.33       | 1.21         |
| PRKARIA       | protein kinase, cAMP-depe    | chr17q23-q24         | mesoderm formation                        | Calcium_regulation_in_cardiac_cells // Gen | 1.10          | 1.07            | -1.01     | 1.00        | -1.10     | 1.13        | -1.20      | -1.20        | -1.20      | 1.05         | -1.38      | -1.51        |
| PRKAR1B       | protein kinase, cAMP-depe    | chr7p22              | regulation of protein phosphorylation     | Calcium_regulation_in_cardiac_cells // Gen | 1.24          | 1.10            | -1.28     | -1.07       | -1.34     | -1.29       | -1.15      | 1.21         | -1.11      | -1.53        | -1.43      | -1.21        |
| PRKAR1B       | protein kinase, cAMP-depe    | chr7p22              | regulation of protein phosphorylation     | Calcium_regulation_in_cardiac_cells // Gen | 1.26          | 1.22            | 1.18      | 1.40        | -1.10     | -1.19       | 1.03       | 1.24         | -1.54      | -2.22        | -1.93      | -1.75        |
| PRKAR2A       | protein kinase, cAMP-depe    | chr3p21.3-p21.2      | regulation of protein phosphorylation     | Calcium_regulation_in_cardiac_cells // Gen | -1.05         | 1.03            | -1.05     | -1.07       | -1.08     | 1.03        | -1.03      | -1.58        | -1.27      | -1.25        | -1.35      | -1.35        |
| PRKAR2A       | protein kinase, cAMP-depe    | chr3p21.3-p21.2      | regulation of protein phosphorylation     | Calcium_regulation_in_cardiac_cells // Gen | 1.21          | -1.14           | 1.15      | 1.27        | 1.18      | 1.37        | 1.17       | 1.24         | -1.73      | -2.21        | 1.13       | -1.11        |
| PRKAR2A       | protein kinase, cAMP-depe    | chr3p21.3-p21.2      | regulation of protein phosphorylation     | Calcium_regulation_in_cardiac_cells // Gen | -1.07         | -1.03           | -1.05     | -1.07       | -1.01     | 1.14        | -1.15      | -1.12        | -1.48      | -1.15        | -1.31      | -1.24        |
| PRKAR2A       | protein kinase, cAMP-depe    | chr3p21.3-p21.2      | regulation of protein phosphorylation     | Calcium_regulation_in_cardiac_cells // Gen | -1.04         | 1.01            | -1.00     | -1.10       | 1.02      | -1.08       | -1.17      | -1.54        | -1.58      | -1.23        | -1.30      | -1.30        |
| PRKCA         | protein kinase C, alpha      | chr17q22-q23.2       | inactivation of MAPK activity             | Calcium_regulation_in_cardiac_cells // Gen | -1.12         | -1.09           | 1.02      | 1.06        | 1.17      | 1.07        | 1.43       | 1.26         | 1.75       | 2.03         | 1.14       | 1.05         |
| PRKCA         | protein kinase C, alpha      | chr17q22-q23.2       | inactivation of MAPK activity             | Calcium_regulation_in_cardiac_cells // Gen | 1.21          | 1.05            | -1.23     | -1.06       | 1.07      | 1.06        | 1.12       | 1.05         | 1.81       | 2.05         | 1.25       | -1.06        |
| PRKCB         | protein kinase C, beta       | chr16p11.2           | transcription, DNA-dependent              | Calcium_regulation_in_cardiac_cells // Gen | 1.08          | -1.01           | 1.01      | -1.11       | 1.07      | 1.01        | -1.23      | -1.16        | -2.93      | -2.28        | -4.45      | -2.82        |
| PRKCB         | protein kinase C, beta       | chr16p11.2           | transcription, DNA-dependent              | Calcium_regulation_in_cardiac_cells // Gen | 1.53          | 1.36            | 1.36      | 1.20        | -1.38     | -1.04       | -1.15      | -1.66        | -1.32      | -1.17        | -8.04      | -2.19        |
| PRKCE         | protein kinase C, epsilon    | chr2p21              | macrophage activation involved in immu    | Calcium_regulation_in_cardiac_cells // Gen | 1.21          | 1.10            | -1.08     | -1.25       | -1.24     | -1.28       | 1.27       | 1.23         | 1.74       | 1.51         | 2.04       | 1.37         |
| PRKCH         | protein kinase C, eta        | chr14q23.1           | protein phosphorylation                   | Calcium_regulation_in_cardiac_cells // Gen | -1.01         | -1.16           | -1.04     | -1.01       | -1.00     | 1.04        | 1.35       | 1.36         | 1.29       | 1.27         | 1.18       | 1.07         |
| PRKCH         | protein kinase C, eta        | chr14q23.1           | protein phosphorylation                   | Calcium_regulation_in_cardiac_cells // Gen | -1.17         | -1.26           | 1.24      | -1.10       | 1.20      | -1.14       | 1.45       | 1.43         | 1.41       | 1.15         | 1.30       | 1.38         |
| PRKCI         | protein kinase C, iota       | chr3q26.3            | protein phosphorylation                   | G_Protein_Signaling // GenMAPP /// Wat_s   | -1.09         | -1.05           | -1.07     | -1.09       | 1.05      | 1.04        | 1.10       | 1.10         | 1.07       | 1.17         | 1.16       | 1.12         |
| PRKCO         | protein kinase C, theta      | chr10p15             | regulation of cell growth                 | Calcium_regulation_in_cardiac_cells // Gen | 1.25          | 1.24            | -1.01     | 1.34        | 1.20      | -1.11       | -1.44      | 1.21         | -1.59      | -1.53        | -2.63      | -2.47        |
| PRKCO-AS1     | PRKCO antisense RNA 1        | chr10p14             | ---                                       | ---                                        | 1.03          | 1.17            | 1.24      | -1.04       | -1.37     | -1.48       | -1.14      | 1.15         | 1.28       | -1.19        | -1.25      | -1.32        |
| PRKCO-AS2     | PRKCO antisense RNA 2        | chr10p14             | ---                                       | ---                                        | -1.09         | -1.04           | 1.14      | 1.28        | 1.16      | 1.03        | -1.02      | -1.12        | -1.32      | -1.25        | -2.02      | -1.75        |
| PRKD2         | protein kinase D2            | chr19q13.3           | angiogenesis                              | ---                                        | -1.10         | -1.15           | -1.08     | 1.02        | 1.17      | -1.06       | 1.12       | 1.12         | 1.60       | 1.39         | 1.31       | 1.45         |
| PRKD2         | protein kinase D2            | chr19q13.3           | angiogenesis                              | ---                                        | -1.07         | -1.12           | 1.00      | 1.21        | 1.12      | -1.04       | 1.22       | 1.16         | 1.50       | 1.26         | 1.10       | 1.25         |
| PRKD3         | protein kinase D3            | chr2p21              | protein phosphorylation                   | G_Protein_Signaling // GenMAPP             | 1.12          | 1.09            | 1.04      | -1.08       | -1.12     | 1.04        | -1.16      | -1.10        | -1.46      | -1.17        | -1.56      | -1.90        |
| PRKD3         | protein kinase D3            | chr2p21              | protein phosphorylation                   | G_Protein_Signaling // GenMAPP             | -1.23         | -1.29           | -1.03     | -1.13       | 1.11      | 1.07        | -1.18      | -1.29        | -1.30      | -1.25        | -1.37      | -1.22        |
| PRKDC         | protein kinase, DNA-activ    | chr8q11              | telomere maintenance                      | Cell_cycle_KEGG // GenMAPP                 | 1.26          | 1.12            | 1.02      | -1.07       | -1.10     | -1.09       | -1.11      | -1.10        | -1.42      | -1.37        | -1.78      | -1.88        |
| PRKDC         | protein kinase, DNA-activ    | chr8q11              | telomere maintenance                      | Cell_cycle_KEGG // GenMAPP                 | 1.19          | 1.17            | -1.06     | -1.12       | -1.20     | 1.05        | -1.18      | -1.10        | -1.33      | -1.15        | -1.55      | -1.77        |
| PRKGI         | protein kinase, cGMP-depe    | chr10q11.2           | neuron migration                          | ---                                        | 2.31          | 1.95            | 1.01      | 1.13        | 1.26      | -1.38       | 6.72       | 6.23         | -6.47      | -1.43        | -2.09      | -1.96        |
| PRKX          | protein kinase, X-linked     | chrXp22.3            | angiogenesis                              | ---                                        | 1.24          | -1.05           | 1.14      | 1.09        | 1.06      | 1.20        | -1.17      | -1.19        | -1.43      | -1.20        | -1.11      | -1.24        |
| PRKX /// PRKX | protein kinase, X-linked     | chrXp22.3 /// chrYp  | angiogenesis                              | ---                                        | 1.06          | -1.13           | 1.06      | 1.03        | 1.01      | -1.07       | -1.09      | -1.12        | -1.37      | -1.36        | -1.14      | -1.16        |
| PRLHR         | prolactin releasing hormon   | chr10p26.13          | signal transduction                       | GPCRDB_Class_A_Rhodopsin-like // GenM      | 2.43          | 3.74            | 1.96      | 2.69        | -1.18     | -3.63       | 1.06       | 2.56         | 5.59       | 1.62         | 1.48       | 1.44         |
| PRLR          | prolactin receptor           | chr5p13.2            | steroid biosynthetic process              | Ovarian_Infertility_Genes // GenMAPP       | 1.92          | 1.50            | -1.53     | -1.34       | 1.47      | 1.91        | -1.02      | 1.22         | 1.99       | 1.18         | -1.39      | -2.01        |
| PRMT1         | protein arginine methyltran  | chr19q13.3           | in utero embryonic development            | mRNA_processing_Reactome // GenMAPP        | -1.10         | -1.10           | -1.06     | -1.08       | -1.05     | -1.04       | 1.02       | -1.05        | 1.27       | 1.17         | -1.10      | -1.14        |
| PRMT10        | protein arginine methyltran  | chr4q31.23           | protein methylation                       | ---                                        | 1.01          | 1.14            | 1.16      | -1.05       | -1.01     | 1.13        | 1.07       | 1.05         | -1.16      | -1.27        | 1.32       | 1.16         |
| PRMT2         | protein arginine methyltran  | chr21q22.3           | protein methylation                       | ---                                        | -1.03         | -1.22           | -1.04     | 1.11        | -1.06     | -1.03       | -1.21      | -1.00        | -1.61      | -1.45        | -1.33      | 1.12         |
| PRMT2         | protein arginine methyltran  | chr21q22.3           | protein methylation                       | ---                                        | -1.02         | -1.01           | -1.01     | 1.00        | 1.09      | -1.14       | 1.45       | 1.26         | 1.32       | 1.04         | -1.16      | -1.15        |
| PRMT2         | protein arginine methyltran  | chr21q22.3           | protein methylation                       | ---                                        | -1.75         | -1.60           | -1.03     | 1.23        | -1.21     | -1.22       | -1.22      | -1.09        | -2.05      | -2.16        | -4.82      | -1.78        |
| PRMT2         | protein arginine methyltran  | chr21q22.3           | protein methylation                       | ---                                        | 1.12          | 1.12            | -1.04     | -1.16       | 1.03      | 1.26        | -1.04      | 1.12         | -1.99      | -2.11        | -2.00      | -2.25        |
| PRMT3         | protein arginine methyltran  | chr1p15.1            | tRNA wobble uridine modification          | ---                                        | 1.27          | 1.22            | 1.04      | -1.03       | -1.12     | 1.11        | -1.15      | -1.15        | -1.50      | -1.24        | -1.28      | -1.52        |
| PRMT5         | protein arginine methyltran  | chr14q11.2           | negative regulation of transcription from | ---                                        | -1.06         | -1.07           | -1.01     | 1.02        | 1.06      | 1.01        | 1.11       | -1.02        | -1.09      | -1.22        | 1.05       | 1.06         |
| PRMT6         | protein arginine methyltran  | chr1p13.3            | tRNA wobble uridine modification          | ---                                        | 1.37          | 1.29            | 1.06      | -1.04       | -1.12     | -1.06       | 1.03       | -1.14        | -3.44      | -2.26        | -2.20      | -2.84        |
| PRMT7         | protein arginine methyltran  | chr16q22.1           | spliceosomal snRNP assembly               | ---                                        | 1.06          | 1.02            | -1.05     | -1.00       | 1.11      | -1.07       | 1.23       | 1.14         | -1.29      | -1.57        | -1.57      | -1.53        |
| PRMT8         | protein arginine methyltran  | chr12p13.3           | protein methylation                       | ---                                        | -1.87         | -1.17           | -3.84     | -1.37       | 1.37      | 2.03        | -1.41      | 1.16         | 1.92       | 1.34         | 2.31       | 1.51         |
| PRND          | prion protein 2 (dublet)     | chr20pter-p12        | cellular copper ion homeostasis           | ---                                        | 1.09          | -2.57           | -1.13     | 1.90        | 1.07      | -1.04       | -2.32      | -1.31        | 4.48       | 1.40         | -1.75      | -1.35        |
| PRO1483       | uncharacterized LOC55448     | chr11p13             | ---                                       | ---                                        | 2.50          | 1.41            | -1.17     | -1.19       | 9.60      | 16.18       | -4.60      | 4.45         | 2.17       | 7.77         | -1.00      | 5.26         |
| PRO2214       | uncharacterized protein PR   | chr5q12.2            | ---                                       | ---                                        | -1.17         | -1.13           | 1.05      | 1.16        | -1.11     | 1.05        | -1.27      | 1.37         | 1.09       | -1.54        | 1.20       | 1.27         |
| PROCR         | protein C receptor, endothe  | chr20q11.2           | immune response                           | ---                                        | 1.07          | 1.02            | 1.00      | 1.07        | 1.03      | 1.07        | 1.14       | 1.14         | 1.71       | 1.61         | 1.45       | 1.41         |
| PROM1         | prominin 1                   | chr4p15.32           | retina layer formation                    | ---                                        | -1.34         | -1.18           | 1.07      | 1.24        | 1.08      | -1.05       | -1.16      | -1.13        | -2.14      | -1.99        | -2.88      | -2.59        |
| PROM2         | prominin 2                   | chr2q11.1            | ---                                       | ---                                        | 1.21          | 1.35            | -1.30     | -1.11       | 1.19      | 1.09        | -1.06      | -1.01        | 1.48       | 1.59         | 2.28       | 2.97         |
| PROS1         | protein S (alpha)            | chr3q11.2            | platelet degranulation                    | ---                                        | 1.01          | 1.07            | -1.03     | -1.01       | -1.11     | -1.01       | -1.03      | -1.00        | -1.10      | 1.09         | -1.40      | -1.32        |
| PROSC         | proline synthetase co-trans  | chr8p11.2            | ---                                       | ---                                        | -1.15         | -1.22           | 1.23      | -1.02       | 1.17      | 1.22        | -1.10      | -1.26        | 1.16       | 1.36         | 1.05       | 1.27         |
| PROSC         | proline synthetase co-trans  | chr8p11.2            | ---                                       | ---                                        | -1.05         | 1.10            | 1.50      | -1.04       | 1.10      | 1.01        | 1.15       | -1.05        | -1.54      | 2.17         | 2.29       | 2.29         |
| PROSC         | proline synthetase co-trans  | chr8p11.2            | ---                                       | ---                                        | -1.06         | -1.02           | 1.10      | -1.08       | 1.06      | 1.08        | -1.31      | -1.20        | -1.05      | -1.12        | 1.36       | 1.23         |
| PROSC         | proline synthetase co-trans  | chr8p11.2            | ---                                       | ---                                        | -1.13         | -1.08           | -1.02     | -1.10       | 1.13      | 1.18        | -1.17      | -1.17        | 1.07       | 1.08         | 1.53       | 1.54         |
| PROSC         | proline synthetase co-trans  | chr8p11.2            | ---                                       | ---                                        | 1.02          | -1.01           | 1.00      | -1.15       | 1.34      | -1.04       | -1.17      | -1.19        | -1.21      | -1.20        | 1.17       | 1.48         |
| PROSER1       | proline and serine rich 1    | chr13q13.3           | ---                                       | ---                                        | 1.21          | 1.09            | 1.07      | 1.23        | -1.11     | 1.00        | 1.57       | 1.47         | 2.00       | 1.55         | 1.90       | 1.73         |
| PROSER1       | proline and serine rich 1    | chr13q13.3           | ---                                       | ---                                        | 1.04          | 1.05            | 1.10      | 1.07        | -1.01     | 1.05        | -1.26      | -1.09        | -1.59      | -1.32        | -1.31      | -1.43        |
| PROSER2       | proline and serine-rich prot | chr10p14             | ---                                       | ---                                        | 1.44          | 1.63            | 1.05      | 1.25        | -1.06     | -1.08       | -1.07      | 1.35         | 1.90       | 1.12         | 2.74       | 2.34         |
| PROSER2       | proline and serine-rich prot | chr10p14             | ---                                       | ---                                        | -1.30         | -1.18           | 1.19      | 1.21        | -1.24     | 1.01        | 1.03       | 1.03         | 1.27       | 1.33         | 2.24       | 1.87         |
| PROX1         | prospero homeobox 1          | chr1q41              | negative regulation of transcription from | ---                                        | 3.78          | 2.33            | 4.00      | 6.73        | -1.73     | -2.18       | 4.49       | 6.27         | -1.01      | 5.46         | -1.71      | -1.22        |
| PROX1         | prospero homeobox 1          | chr1q41              | negative regulation of transcription from | ---                                        | -1.22         | 1.06            | 1.40      | -1.01       | 1.84      | 1.18        | -1.63      | -1.38        | 1.16       | 1.55         | 6.46       | 10.42        |
| PRPF18        | pre-mRNA processing fact     | chr10p13             | mRNA processing                           | mRNA_processing_Reactome // GenMAPP        | -1.18         | 1.10            | 1.07      | -1.01       | -1.42     | -1.15       | 1.10       | 1.30         | 1.06       | -1.02        | 1.15       | 1.38         |

| ID              | Gene Title                                    | Chromosomal Location | 1st Gene Ontology Biological Process                                 | Pathway                             | A2497 30 mins | A2497P' 30 mins | A2497 2 h | A2497P' 2 h | A2497 4 h | A2497P' 4 h | A2497 24 h | A2497P' 24 h | A2497 48 h | A2497P' 48 h | A2497 72 h | A2497P' 72 h |
|-----------------|-----------------------------------------------|----------------------|----------------------------------------------------------------------|-------------------------------------|---------------|-----------------|-----------|-------------|-----------|-------------|------------|--------------|------------|--------------|------------|--------------|
| PRPF31          | pre-mRNA processing factor                    | chr19q13.42          | assembly of spliceosomal tri-snRNP                                   | ---                                 | 1.01          | -1.04           | -1.01     | 1.01        | -1.04     | -1.08       | 1.11       | 1.03         | 1.00       | -1.20        | -1.26      | -1.18        |
| PRPF38A         | PRP38 pre-mRNA processing factor              | chr1p32.3            | mRNA processing                                                      | ---                                 | -1.10         | -1.13           | -1.02     | 1.04        | -1.02     | -1.02       | 1.01       | 1.08         | 1.23       | 1.24         | -1.01      | 1.09         |
| PRPF38B         | PRP38 pre-mRNA processing factor              | chr1p13.3            | mRNA processing                                                      | ---                                 | 1.10          | -1.07           | 1.02      | -1.05       | -1.05     | 1.17        | -1.22      | -1.20        | -1.67      | -1.59        | -1.65      | -1.98        |
| PRPF39          | PRP39 pre-mRNA processing factor              | chr14q21.2           | RNA processing                                                       | ---                                 | 1.77          | 1.48            | -1.06     | -1.03       | 1.10      | 1.11        | 1.37       | -1.01        | -2.18      | -2.11        | -2.00      | -2.75        |
| PRPF4           | PRP4 pre-mRNA processing factor               | chr9q31-q33          | RNA splicing, via transesterification reaction                       | mRNA_processing_Reactome // GenMAPP | -1.16         | -1.11           | -1.05     | -1.08       | 1.01      | 1.02        | -1.10      | 1.06         | 1.02       | 1.02         | 1.19       | 1.29         |
| PRPF4           | PRP4 pre-mRNA processing factor               | chr9q31-q33          | RNA splicing, via transesterification reaction                       | mRNA_processing_Reactome // GenMAPP | -1.19         | -1.24           | 1.03      | -1.09       | 1.16      | 1.03        | -1.08      | -1.15        | -1.08      | -1.19        | 1.25       | 1.29         |
| PRPF40A         | PRP40 pre-mRNA processing factor              | chr2q23.3            | mRNA processing                                                      | mRNA_processing_Reactome // GenMAPP | 1.30          | 1.18            | 1.10      | 1.11        | 1.19      | 1.25        | -1.24      | -1.09        | -1.51      | -1.58        | -2.12      | -1.80        |
| PRPF40A         | PRP40 pre-mRNA processing factor              | chr2q23.3            | mRNA processing                                                      | mRNA_processing_Reactome // GenMAPP | 1.02          | -1.01           | 1.08      | -1.08       | 1.08      | 1.05        | -1.17      | 1.04         | 1.20       | -1.00        | 1.53       | 1.47         |
| PRPF4B          | PRP4 pre-mRNA processing factor               | chr6p25.2            | mRNA splicing, via spliceosome                                       | mRNA_processing_Reactome // GenMAPP | 1.02          | -1.03           | 1.00      | 1.03        | -1.15     | 1.10        | -1.25      | -1.02        | -1.86      | -1.43        | -2.09      | -2.63        |
| PRPF4B          | PRP4 pre-mRNA processing factor               | chr6p25.2            | mRNA splicing, via spliceosome                                       | mRNA_processing_Reactome // GenMAPP | 1.22          | 1.22            | -1.10     | 1.13        | 1.00      | 1.21        | -1.21      | -1.03        | -1.72      | -1.42        | -1.56      | -1.62        |
| PRPF8           | pre-mRNA processing factor                    | chr17p13.3           | RNA splicing, via transesterification reaction                       | ---                                 | -1.05         | -1.04           | 1.06      | 1.12        | -1.01     | -1.04       | 1.15       | 1.07         | 1.07       | -1.12        | -1.29      | -1.14        |
| PRPS1           | phosphoribosyl pyrophosphatase                | chrXq22.3            | carbohydrate metabolic process                                       | ---                                 | -1.15         | -1.20           | -1.01     | 1.07        | 1.05      | -1.02       | 1.04       | 1.09         | 1.70       | 1.38         | 1.54       | 1.85         |
| PRPS2           | phosphoribosyl pyrophosphatase                | chrXp22.2            | 5-phosphoribose 1-diphosphate biosynthesis                           | Nucleotide_Metabolism // GenMAPP    | -1.05         | 1.02            | -1.00     | -1.02       | 1.03      | 1.04        | 1.01       | -1.01        | 1.05       | 1.09         | -1.04      | -1.07        |
| PRR13           | proline rich 13                               | chr12q12             | transcription, DNA-dependent                                         | ---                                 | -1.04         | -1.06           | 1.00      | -1.03       | 1.00      | -1.01       | -1.05      | 1.29         | 1.19       | 1.19         | 1.25       | 1.25         |
| PRR15           | proline rich 15                               | chr7p14.3            | multicellular organismal development                                 | ---                                 | -1.17         | -1.27           | -1.08     | -1.11       | 1.20      | 1.06        | 1.75       | 1.88         | 1.76       | 1.80         | 1.40       | 1.44         |
| PRR19           | proline rich 19                               | chr19q13.2           | 0                                                                    | ---                                 | -1.03         | -1.21           | 1.37      | 1.26        | -1.31     | -1.03       | -1.13      | 1.09         | -1.51      | -2.04        | -1.84      | -1.30        |
| PRR24           | proline rich 24                               | chr19q13.32          | 0                                                                    | ---                                 | -1.07         | -1.17           | -1.07     | 1.20        | -1.01     | -1.11       | 1.40       | 1.27         | 2.09       | 1.54         | 1.41       | 1.58         |
| PRR3            | proline rich 3                                | chr6p21.33           | 0                                                                    | ---                                 | 1.20          | 1.25            | 1.12      | -1.11       | 1.11      | 1.02        | 1.21       | -1.06        | -1.30      | -1.43        | -1.93      | -2.40        |
| PRR5            | proline rich 5 (renal)                        | chr22q13             | cell cycle                                                           | ---                                 | -1.24         | -1.24           | -1.08     | 1.20        | 1.09      | 1.18        | 1.13       | 1.07         | 1.89       | 1.43         | 1.26       | 1.35         |
| PRR5L           | proline rich 5 like                           | chr11p13-p12         | 0                                                                    | ---                                 | -1.00         | -1.16           | 1.05      | -1.25       | 1.10      | 1.25        | 1.30       | 1.10         | -1.39      | -1.20        | -1.52      | -1.18        |
| PRR7-AS1        | PRR7 antisense RNA 1                          | chr5q35.3            | 0                                                                    | ---                                 | -1.58         | -1.17           | 2.15      | 1.51        | -1.14     | -1.16       | -1.41      | -1.87        | -2.33      | -1.47        | -1.46      | -1.73        |
| PRRC1           | proline-rich coiled-coil 1                    | chr5q23.2            | 0                                                                    | ---                                 | -1.06         | 1.12            | 1.07      | -1.08       | 1.07      | -1.01       | 1.11       | 1.05         | 1.16       | 1.08         | 1.70       | 1.46         |
| PRRC2B          | proline-rich coiled-coil 2B                   | chr9q34.13           | 0                                                                    | ---                                 | -1.03         | -1.03           | 1.02      | 1.06        | 1.07      | 1.01        | 1.13       | 1.05         | 1.00       | 1.04         | -1.13      | -1.10        |
| PRRC2C          | proline-rich coiled-coil 2C                   | chr1q23.3            | 0                                                                    | ---                                 | -1.05         | -1.06           | 1.06      | 1.08        | 1.02      | -1.05       | 1.06       | 1.09         | 1.21       | 1.07         | 1.05       | 1.17         |
| PRRG3           | proline rich Glu (G-carboxy)                  | chrXq28              | 0                                                                    | ---                                 | 1.55          | 1.67            | 1.26      | -3.00       | 2.72      | 3.15        | -1.04      | -1.07        | 1.02       | -1.83        | -2.13      | -1.69        |
| PRRT3           | proline-rich transmembrane protein            | chr3p25.3            | 0                                                                    | ---                                 | -1.06         | 1.10            | 1.03      | 1.22        | 1.10      | 1.05        | -1.18      | 1.00         | -2.95      | -3.69        | -3.76      | -2.82        |
| PRRT3-AS1       | PRRT3 antisense RNA 1                         | ---                  | 0                                                                    | ---                                 | -1.13         | -1.13           | -1.03     | -1.12       | 1.05      | -1.04       | -1.14      | -1.09        | -1.36      | -1.21        | -2.83      | -2.54        |
| PRRX1           | paired related homeobox 1                     | chr1q24              | negative regulation of transcription from RNA polymerase II promoter | ---                                 | -1.02         | 1.04            | -1.04     | -1.00       | 1.03      | -1.03       | 1.24       | 1.17         | -1.58      | -2.13        | -1.89      | -1.84        |
| PRSS2           | protease, serine, 2 (trypsin)                 | chr7q34              | proteolysis                                                          | ---                                 | 1.03          | 1.30            | -1.15     | 1.79        | -1.10     | -1.20       | 1.42       | 1.66         | 3.15       | 2.43         | 1.74       | 1.41         |
| PRSS2           | protease, serine, 2 (trypsin)                 | chr7q34              | proteolysis                                                          | ---                                 | 1.12          | -1.38           | 1.09      | 1.09        | -1.84     | -1.70       | -1.05      | -1.44        | 4.57       | 2.42         | 3.16       | 3.03         |
| PRSS2           | protease, serine, 2 (trypsin)                 | chr7q34              | proteolysis                                                          | ---                                 | -1.04         | 1.27            | 3.53      | 3.19        | -1.01     | 1.08        | -2.50      | -2.83        | 2.99       | 2.52         | 3.50       | 4.45         |
| PRSS2 /// PRSS2 | protease, serine, 2 (trypsin)                 | chr7q34 /// chr9p11  | proteolysis                                                          | ---                                 | 1.68          | -1.09           | -1.16     | -1.06       | -1.32     | 1.05        | 2.51       | 2.70         | 5.01       | 3.57         | 11.14      | 12.34        |
| PRSS2 /// PRSS2 | protease, serine, 2 (trypsin)                 | chr7q34 /// chr9p11  | proteolysis                                                          | ---                                 | 1.07          | 1.17            | -1.20     | 1.04        | -1.39     | -1.78       | 1.27       | 1.38         | 8.89       | 5.11         | 10.29      | 9.38         |
| PRSS23          | protease, serine, 23                          | chr11q14.1           | proteolysis                                                          | ---                                 | 1.20          | 1.22            | -1.30     | -1.01       | -1.06     | 1.05        | 1.67       | 1.17         | -1.46      | -1.39        | -1.32      | -1.99        |
| PRSS23          | protease, serine, 23                          | chr11q14.1           | proteolysis                                                          | ---                                 | -1.09         | 1.04            | 1.01      | -1.14       | 1.01      | -1.07       | 1.19       | 1.04         | 1.29       | 1.13         | 1.56       | 1.46         |
| PRSS53          | protease, serine, 53                          | chr16p11.2           | proteolysis                                                          | ---                                 | -1.56         | -2.17           | -1.82     | -1.67       | 1.64      | 1.86        | -1.19      | 1.08         | 1.88       | 2.05         | 3.00       | 3.65         |
| PRSS54          | protease, serine, 54                          | chr16q21             | proteolysis                                                          | ---                                 | -1.12         | -1.23           | -1.21     | -1.04       | 1.13      | 1.10        | 1.02       | 1.15         | -1.74      | -1.37        | -1.96      | -3.06        |
| PRSS55          | protease, serine, 55                          | chr8p23.1            | proteolysis                                                          | ---                                 | 4.27          | 3.44            | -1.74     | -3.76       | 1.26      | 1.49        | 1.70       | 1.62         | 1.28       | -1.04        | -1.57      | 1.43         |
| PRSS8           | protease, serine, 8                           | chr16p11.2           | proteolysis                                                          | ---                                 | 1.13          | -1.38           | 1.65      | -1.12       | -3.90     | -1.80       | 1.37       | -1.11        | 4.42       | 1.28         | 1.72       | 2.60         |
| PRTFDC1         | phosphoribosyl transferase                    | chr10p12.1           | purine ribonucleoside salvage                                        | ---                                 | 1.15          | 1.16            | -1.08     | -1.11       | -1.25     | -1.13       | -1.23      | 1.08         | -1.75      | -1.59        | -3.48      | -2.68        |
| PRTG            | protogenin                                    | chr15q21.3           | multicellular organismal development                                 | ---                                 | 1.48          | 1.27            | 1.07      | 1.03        | 1.25      | 1.23        | 1.12       | 1.00         | -2.03      | -2.07        | -1.41      | -2.32        |
| PRTG            | protogenin                                    | chr15q21.3           | multicellular organismal development                                 | ---                                 | -1.24         | -1.35           | 1.06      | -1.04       | -1.07     | -1.01       | 1.03       | -1.01        | -1.82      | -1.42        | -1.15      | -1.19        |
| PRTN3           | proteinase 3                                  | chr19p13.3           | proteolysis                                                          | ---                                 | -2.48         | -1.25           | 2.06      | 1.13        | 1.47      | 2.35        | 1.18       | 1.11         | 1.68       | 2.19         | 17.69      | 20.25        |
| PRUNE           | prune exopolyphosphatase                      | chr1q21              | 0                                                                    | ---                                 | -1.13         | 1.02            | 1.22      | 1.04        | 1.26      | 1.01        | 1.11       | -1.08        | 1.07       | -1.19        | 1.07       | -1.06        |
| PRUNE2          | prune homolog 2 (Drosophila)                  | chr9q21.2            | apoptotic process                                                    | ---                                 | 1.23          | 1.05            | 1.07      | -1.06       | 1.13      | 1.19        | 1.12       | -1.02        | -1.37      | -1.13        | 1.10       | 1.21         |
| PSAT1           | phosphoserine aminotransferase                | chr9q21.2            | L-serine biosynthetic process                                        | ---                                 | 1.00          | 1.08            | -1.09     | -1.16       | -1.08     | -1.04       | -1.26      | -1.09        | -1.32      | -1.17        | -1.24      | -1.25        |
| PSD3            | pleckstrin and Sec7 domain containing protein | chr8p21.3            | vesicle-mediated transport                                           | Proteasome_Degradation // GenMAPP   | -1.11         | -1.06           | 1.02      | -1.10       | 1.01      | 1.08        | -1.19      | -1.07        | -1.42      | -1.19        | -1.12      | 1.01         |
| PSD4            | pleckstrin and Sec7 domain containing protein | chr2q13              | vesicle-mediated transport                                           | Proteasome_Degradation // GenMAPP   | -1.11         | -1.11           | -1.11     | -1.02       | 1.15      | 1.17        | 1.02       | 1.05         | 1.23       | 1.23         | 1.32       | 1.56         |
| PSEN1           | presenilin 1                                  | chr14q24.3           | autophagic vacuole assembly                                          | ---                                 | -1.03         | 1.11            | -1.08     | -1.20       | -1.06     | -1.02       | -1.12      | -1.09        | 1.26       | 1.30         | 1.46       | 1.27         |
| PSEN1           | presenilin 1                                  | chr14q24.3           | autophagic vacuole assembly                                          | ---                                 | 1.36          | 1.17            | 1.01      | -1.03       | 1.17      | 1.13        | -1.64      | -1.21        | 1.07       | -1.29        | 1.36       | 1.27         |
| PSEN1           | presenilin 1                                  | chr14q24.3           | autophagic vacuole assembly                                          | ---                                 | -1.11         | -1.16           | 1.19      | -1.12       | 1.15      | 1.05        | -1.28      | -1.16        | -1.18      | -1.15        | 1.48       | 1.45         |
| PSEN1           | presenilin 1                                  | chr14q24.3           | autophagic vacuole assembly                                          | ---                                 | -1.16         | -1.18           | 1.06      | 1.01        | 1.34      | 1.02        | 1.04       | 1.00         | 1.01       | 1.02         | 1.19       | 1.25         |
| PSEN1           | presenilin 1                                  | chr14q24.3           | autophagic vacuole assembly                                          | ---                                 | 1.60          | 3.69            | 1.73      | -1.12       | 2.94      | -1.10       | -3.15      | 1.81         | 7.32       | 7.81         | 1.33       | 1.04         |
| PSEN2           | presenilin 2 (Alzheimer disease)              | chr1q31-q42          | response to hypoxia                                                  | ---                                 | -1.23         | -1.24           | 1.00      | 1.28        | -1.01     | 1.07        | -1.04      | 1.08         | -1.25      | -1.27        | -1.51      | -1.21        |
| PSEN2           | presenilin 2 (Alzheimer disease)              | chr1q31-q42          | response to hypoxia                                                  | ---                                 | 1.12          | -1.08           | 1.21      | 1.43        | -1.10     | -1.09       | -1.37      | -1.08        | -1.19      | -1.53        | -1.33      | -1.37        |
| PSG1            | pregnancy specific beta-1-glycoprotein        | chr19q13.2           | female pregnancy                                                     | ---                                 | -1.26         | 1.19            | 1.12      | 1.64        | 1.02      | 1.38        | -1.04      | -1.70        | 1.44       | -1.59        | 1.42       | 1.26         |
| PSG1            | pregnancy specific beta-1-glycoprotein        | chr19q13.2           | female pregnancy                                                     | ---                                 | 1.65          | 1.54            | -1.13     | -1.30       | -1.27     | 1.65        | -1.63      | 1.05         | 2.17       | 1.60         | 1.27       | -1.05        |
| PSG2            | pregnancy specific beta-1-glycoprotein        | chr19q13.1-q13.2     | female pregnancy                                                     | ---                                 | 1.26          | 1.73            | -1.36     | -1.62       | -1.57     | -2.95       | -1.11      | -1.35        | -1.41      | -1.23        | -1.15      | -2.07        |
| PSG3            | pregnancy specific beta-1-glycoprotein        | chr19q13.2           | defense response                                                     | ---                                 | 1.94          | 2.18            | 1.11      | 1.09        | -1.24     | 1.37        | -1.08      | -1.15        | -1.11      | -1.86        | 2.22       | -1.00        |
| PSG3            | pregnancy specific beta-1-glycoprotein        | chr19q13.2           | defense response                                                     | ---                                 | 2.67          | 2.47            | 1.15      | -1.44       | -1.95     | 1.06        | -1.57      | -1.36        | -1.12      | -1.44        | 1.14       | -1.13        |
| PSG4 /// PSG3   | pregnancy specific beta-1-glycoprotein        | chr19q13.2           | defense response                                                     | ---                                 | -1.03         | 1.26            | -1.23     | -1.05       | 1.63      | 2.59        | -2.08      | 1.02         | 1.44       | -1.00        | 7.18       | 4.16         |
| PSG6            | pregnancy specific beta-1-glycoprotein        | chr19q13.2           | female pregnancy                                                     | ---                                 | 1.55          | 1.52            | 1.19      | 1.18        | 1.37      | 1.37        | 1.52       | 1.71         | 1.25       | -1.41        | 1.74       | 1.40         |
| PSG6            | pregnancy specific beta-1-glycoprotein        | chr19q13.2           | female pregnancy                                                     | ---                                 | 1.40          | 1.31            | -1.31     | -1.09       | -1.20     | 1.35        | -3.30      | -2.10        | 1.32       | 1.02         | 2.22       | 1.46         |
| PSG9            | pregnancy specific beta-1-glycoprotein        | chr19q13.2           | defense response                                                     | ---                                 | 1.46          | 1.17            | -2.12     | -1.06       | -1.47     | -1.61       | 1.23       | 1.08         | -1.46      | -1.42        | 2.85       | 1.63         |
| PSIP1           | PC4 and SFRS1 interacting protein             | chr9p22.3            | mRNA 5'-splice site recognition                                      | ---                                 | 1.09          | 1.02            | 1.02      | 1.04        | -1.10     | -1.05       | -1.07      | 1.01         | -1.71      | -1.32        | -1.21      | -1.23        |
| PSIP1           | PC4 and SFRS1 interacting protein             | chr9p22.3            | mRNA 5'-splice site recognition                                      | ---                                 | 1.15          | 1.06            | -1.14     | -1.07       | -1.06     | 1.05        | -1.06      | -1.10        | -1.30      | -1.08        | -1.31      | -1.24        |

| ID        | Gene Title                      | Chromosomal Location | 1st Gene Ontology Biological Process      | Pathway                                   | A2497 30 mins | A2497P' 30 mins | A2497 2 h | A2497P' 2 h | A2497 4 h | A2497P' 4 h | A2497 24 h | A2497P' 24 h | A2497 48 h | A2497P' 48 h | A2497 72 h | A2497P' 72 h |
|-----------|---------------------------------|----------------------|-------------------------------------------|-------------------------------------------|---------------|-----------------|-----------|-------------|-----------|-------------|------------|--------------|------------|--------------|------------|--------------|
| PSKH1     | protein serine kinase H1        | chr16q22.1           | protein phosphorylation                   | mRNA_processing_Reactome // GenMAPP       | 1.02          | -1.14           | 1.05      | 1.02        | 1.02      | -1.26       | -1.25      | -1.07        | -1.89      | -1.59        | -1.94      | -1.62        |
| PSMA1     | proteasome (prosome, mac)       | chr1p15.1            | cell cycle checkpoint                     | Proteasome_Degradation // GenMAPP         | -1.09         | -1.00           | -1.05     | -1.03       | 1.07      | -1.02       | 1.12       | 1.06         | 1.37       | 1.20         | 1.05       | 1.21         |
| PSMA1     | proteasome (prosome, mac)       | chr1p15.1            | cell cycle checkpoint                     | Proteasome_Degradation // GenMAPP         | -1.09         | -1.01           | -1.04     | -1.05       | 1.05      | -1.08       | 1.14       | 1.04         | 1.38       | 1.14         | 1.07       | 1.15         |
| PSMA1     | proteasome (prosome, mac)       | chr1p15.1            | cell cycle checkpoint                     | Proteasome_Degradation // GenMAPP         | -1.16         | -1.16           | -1.05     | 1.01        | -1.03     | -1.06       | 1.05       | 1.02         | 1.25       | 1.22         | 1.10       | 1.23         |
| PSMA2     | proteasome (prosome, mac)       | chr7p13              | cell cycle checkpoint                     | Proteasome_Degradation // GenMAPP         | 1.04          | 1.01            | 1.04      | 1.10        | 1.05      | 1.01        | 1.02       | -1.07        | -1.34      | -1.26        | -1.47      | -1.48        |
| PSMA3     | proteasome (prosome, mac)       | chr14q23             | cell cycle checkpoint                     | Proteasome_Degradation // GenMAPP         | 1.55          | 1.37            | -1.15     | -1.45       | 1.45      | 1.34        | -1.31      | 1.04         | -2.53      | -1.39        | -2.26      | -1.47        |
| PSMA3     | proteasome (prosome, mac)       | chr14q23             | G1                                        | Proteasome_Degradation // GenMAPP         | -1.12         | -1.16           | -1.30     | -1.13       | -1.06     | 1.27        | 1.17       | 1.09         | 1.28       | 1.22         | 1.65       | 1.38         |
| PSMA4     | proteasome (prosome, mac)       | chr15q25.1           | cell cycle checkpoint                     | Circadian_Exercise // GenMAPP // Protease | -1.04         | 1.06            | -1.07     | -1.05       | -1.14     | -1.05       | -1.21      | -1.06        | -1.20      | -1.07        | -1.09      | -1.10        |
| PSMA5     | proteasome (prosome, mac)       | chr1p13              | cell cycle checkpoint                     | Proteasome_Degradation // GenMAPP         | 1.21          | 1.19            | -1.40     | -1.13       | 1.11      | 1.14        | -1.67      | -1.55        | -4.27      | -2.46        | -4.27      | -4.76        |
| PSMB10    | proteasome (prosome, mac)       | chr16q22.1           | cell cycle checkpoint                     | Proteasome_Degradation // GenMAPP         | -1.12         | -1.12           | 1.05      | 1.01        | 1.33      | 1.02        | 1.69       | 1.28         | 1.79       | 1.40         | 1.22       | 1.29         |
| PSMB2     | proteasome (prosome, mac)       | chr1p34.2            | G1                                        | Proteasome_Degradation // GenMAPP         | 1.34          | 1.87            | 1.02      | -2.14       | -1.07     | -1.02       | 1.39       | 1.12         | 2.83       | 3.71         | 1.99       | 2.13         |
| PSMB4     | proteasome (prosome, mac)       | chr1q21              | cell cycle checkpoint                     | Proteasome_Degradation // GenMAPP         | -1.09         | 1.02            | -1.01     | -1.01       | 1.11      | -1.03       | 1.14       | 1.03         | 1.26       | 1.07         | 1.06       | 1.04         |
| PSMB4     | proteasome (prosome, mac)       | chr1q21              | cell cycle checkpoint                     | Proteasome_Degradation // GenMAPP         | 1.07          | 1.05            | -1.01     | 1.06        | -1.01     | -1.07       | 1.03       | -1.03        | 1.34       | 1.03         | 1.01       | 1.00         |
| PSMB7     | proteasome (prosome, mac)       | chr9q34.11-q34.12    | G1                                        | ---                                       | 1.05          | -1.33           | 1.21      | 1.09        | 1.07      | 1.23        | -1.04      | -1.14        | -3.02      | -2.63        | -2.27      | -1.63        |
| PSMB7     | proteasome (prosome, mac)       | chr9q34.11-q34.12    | cell cycle checkpoint                     | Proteasome_Degradation // GenMAPP         | -1.10         | -1.03           | -1.05     | 1.00        | 1.03      | -1.04       | 1.13       | 1.04         | 1.26       | 1.05         | -1.00      | 1.03         |
| PSMC2     | proteasome (prosome, mac)       | chr7q22.1-q22.3      | cell cycle checkpoint                     | Proteasome_Degradation // GenMAPP         | -1.25         | -1.18           | 1.16      | -1.09       | 1.06      | -1.03       | -1.10      | -1.12        | -1.60      | -1.73        | -1.84      | -1.76        |
| PSMC2     | proteasome (prosome, mac)       | chr7q22.1-q22.3      | cell cycle checkpoint                     | Proteasome_Degradation // GenMAPP         | 1.13          | 1.16            | -1.17     | -1.28       | -1.07     | 1.13        | -1.20      | -1.11        | -1.45      | -1.48        | -2.25      | -2.34        |
| PSMC3     | proteasome (prosome, mac)       | chr1p11.2            | cell cycle checkpoint                     | Proteasome_Degradation // GenMAPP         | -1.14         | -1.10           | -1.04     | -1.01       | 1.08      | -1.02       | 1.05       | -1.02        | -1.31      | -1.22        | -1.36      | -1.34        |
| PSMC3IP   | PSMC3 interacting protein       | chr17q21.2           | DNA recombination                         | ---                                       | -1.05         | -1.01           | -1.02     | 1.03        | -1.03     | -1.07       | 1.14       | 1.06         | 1.38       | 1.23         | 1.10       | 1.14         |
| PSMC4     | proteasome (prosome, mac)       | chr19q13.11-q13.13   | cell cycle checkpoint                     | Proteasome_Degradation // GenMAPP         | -1.09         | -1.05           | -1.01     | -1.03       | 1.03      | -1.06       | 1.11       | -1.00        | 1.19       | 1.09         | 1.27       | 1.35         |
| PSMC5     | proteasome (prosome, mac)       | chr17q23.3           | cell cycle checkpoint                     | Proteasome_Degradation // GenMAPP // Ps   | -1.08         | -1.02           | 1.00      | 1.03        | -1.01     | -1.07       | 1.10       | 1.09         | 1.04       | -1.09        | -1.14      | -1.06        |
| PSMC6     | proteasome (prosome, mac)       | chr14q22.1           | cell cycle checkpoint                     | ---                                       | 1.08          | 1.09            | 1.02      | 1.08        | 1.00      | -1.03       | 1.07       | -1.02        | 1.23       | 1.07         | 1.27       | 1.19         |
| PSMD1     | proteasome (prosome, mac)       | chr2q37.1            | cell cycle checkpoint                     | Proteasome_Degradation // GenMAPP         | 1.00          | 1.04            | -1.01     | -1.00       | 1.06      | -1.06       | 1.07       | -1.01        | -1.15      | -1.17        | -1.03      | -1.03        |
| PSMD11    | proteasome (prosome, mac)       | chr17q11.2           | cell cycle checkpoint                     | Proteasome_Degradation // GenMAPP         | 1.02          | 1.09            | 1.08      | -1.01       | -1.01     | -1.04       | 1.04       | -1.06        | 1.25       | 1.03         | 1.22       | 1.06         |
| PSMD11    | proteasome (prosome, mac)       | chr17q11.2           | cell cycle checkpoint                     | Proteasome_Degradation // GenMAPP         | 1.06          | 1.05            | 1.04      | -1.14       | 1.01      | 1.01        | -1.20      | -1.08        | 1.45       | 1.32         | 1.21       | 1.17         |
| PSMD12    | proteasome (prosome, mac)       | chr17q24.2           | cell cycle checkpoint                     | Proteasome_Degradation // GenMAPP         | 1.16          | 1.23            | -1.06     | -1.27       | -1.00     | -1.01       | -1.86      | -1.38        | -1.32      | -1.43        | -1.25      | -1.62        |
| PSMD12    | proteasome (prosome, mac)       | chr17q24.2           | cell cycle checkpoint                     | Proteasome_Degradation // GenMAPP         | 1.02          | -1.01           | -1.04     | 1.01        | 1.06      | 1.02        | -1.05      | 1.04         | 1.39       | 1.24         | 1.71       | 1.62         |
| PSMD13    | proteasome (prosome, mac)       | chr1p15.5            | cell cycle checkpoint                     | Proteasome_Degradation // GenMAPP         | 1.03          | -1.05           | 1.04      | 1.11        | -1.05     | 1.05        | 1.10       | 1.03         | 1.46       | 1.39         | 1.27       | 1.41         |
| PSMD13    | proteasome (prosome, mac)       | chr1p15.5            | cell cycle checkpoint                     | Proteasome_Degradation // GenMAPP         | -1.07         | -1.09           | 1.01      | 1.04        | 1.05      | 1.04        | 1.09       | 1.06         | 1.26       | 1.26         | 1.42       | 1.46         |
| PSMD14    | proteasome (prosome, mac)       | chr2q42.2            | cell cycle checkpoint                     | ---                                       | -1.02         | -1.00           | -1.03     | -1.00       | -1.01     | -1.03       | 1.01       | 1.01         | 1.32       | 1.18         | 1.11       | 1.12         |
| PSMD3     | proteasome (prosome, mac)       | chr17q21.1           | cell cycle checkpoint                     | Proteasome_Degradation // GenMAPP         | -1.01         | -1.18           | 1.08      | -1.10       | 1.14      | 1.16        | -1.00      | 1.04         | -1.37      | -1.28        | 1.36       | 1.46         |
| PSMD5     | proteasome (prosome, mac)       | chr9q33.2            | cell cycle checkpoint                     | Proteasome_Degradation // GenMAPP         | 1.17          | 1.19            | -1.04     | -1.05       | -1.19     | 1.03        | -1.22      | -1.21        | -1.28      | -1.13        | -1.22      | -1.33        |
| PSMD5-AS1 | PSMD5 antisense RNA 1           | (chr9q33.2)          | 0                                         | ---                                       | -1.06         | -1.09           | 1.06      | 1.05        | 1.15      | 1.04        | -1.12      | -1.06        | -1.78      | -1.83        | -1.70      | -1.33        |
| PSMD5-AS1 | PSMD5 antisense RNA 1           | (chr9q33.2)          | 0                                         | ---                                       | -1.20         | -1.28           | 1.14      | 1.18        | 1.48      | 1.12        | 1.10       | 1.14         | -2.75      | -2.00        | -1.43      | -1.87        |
| PSMD5-AS1 | PSMD5 antisense RNA 1           | (chr9q33.2)          | 0                                         | ---                                       | -1.94         | -1.44           | 1.61      | 2.16        | 2.38      | 1.78        | -2.41      | -1.97        | -1.03      | 1.07         | -2.79      | -2.08        |
| PSMD6     | proteasome (prosome, mac)       | chr3p14.1            | cell cycle checkpoint                     | Proteasome_Degradation // GenMAPP         | -1.04         | -1.02           | -1.02     | 1.05        | 1.01      | -1.00       | -1.07      | -1.04        | 1.04       | -1.06        | -1.06      | -1.03        |
| PSMD6-AS2 | PSMD6 antisense RNA 2           | chr3p14              | 0                                         | ---                                       | 1.24          | 1.11            | -1.04     | -1.11       | 1.20      | 1.48        | -1.30      | -1.27        | -1.86      | -1.71        | -1.84      | -2.35        |
| PSMD9     | proteasome (prosome, mac)       | chr12q24.31-q24.32   | cell cycle checkpoint                     | Proteasome_Degradation // GenMAPP         | -1.02         | -1.03           | -1.04     | -1.05       | 1.05      | 1.06        | -1.21      | 1.06         | -1.15      | -1.15        | -1.23      | -1.24        |
| PSME2     | proteasome (prosome, mac)       | chr14q11.2           | cell cycle checkpoint                     | Proteasome_Degradation // GenMAPP         | -1.06         | -1.01           | -1.01     | -1.01       | -1.05     | -1.14       | 1.12       | 1.15         | 1.44       | 1.31         | 1.07       | 1.08         |
| PSME3     | proteasome (prosome, mac)       | chr17q21             | cell cycle checkpoint                     | ---                                       | 1.00          | 1.02            | -1.02     | 1.02        | 1.05      | 1.06        | -1.07      | -1.02        | -1.41      | -1.42        | -1.30      | -1.32        |
| PSME3     | proteasome (prosome, mac)       | chr17q21             | cell cycle checkpoint                     | ---                                       | 1.02          | -1.02           | 1.10      | 1.09        | 1.14      | 1.00        | -1.19      | -1.03        | -1.40      | -1.51        | -1.80      | -1.67        |
| PSME4     | proteasome (prosome, mac)       | chr2p16.2            | cell cycle checkpoint                     | ---                                       | -1.06         | -1.04           | 1.01      | 1.07        | 1.02      | -1.02       | 1.04       | -1.01        | -1.09      | -1.04        | 1.00       | 1.02         |
| PSMF1     | proteasome (prosome, mac)       | chr20p13             | cell cycle checkpoint                     | ---                                       | 1.41          | 1.05            | -1.01     | 1.09        | -1.18     | -1.18       | -1.38      | -1.37        | -1.36      | -1.14        | -1.60      | -1.86        |
| PSMF1     | proteasome (prosome, mac)       | chr20p13             | cell cycle checkpoint                     | ---                                       | 1.04          | -1.03           | 1.01      | 1.10        | -1.09     | 1.04        | -1.05      | -1.12        | -1.21      | -1.17        | -1.35      | -1.24        |
| PSMF1     | proteasome (prosome, mac)       | chr20p13             | cell cycle checkpoint                     | ---                                       | 1.07          | 1.16            | -1.01     | 1.00        | 1.02      | 1.02        | 1.03       | 1.19         | -1.40      | -1.24        | -1.50      | -1.45        |
| PSMG1     | proteasome (prosome, mac)       | chr21q22.3           | proteasome assembly                       | ---                                       | -1.01         | 1.02            | -1.06     | -1.01       | 1.00      | 1.12        | -1.11      | -1.07        | -1.30      | -1.21        | -1.43      | -1.30        |
| PSMG3     | proteasome (prosome, mac)       | chr7p22.3            | 0                                         | ---                                       | -1.03         | -1.01           | 1.00      | 1.01        | 1.05      | -1.03       | 1.03       | -1.05        | 1.23       | 1.17         | 1.24       | 1.18         |
| PSMG4     | proteasome (prosome, mac)       | chr6p25.2            | 0                                         | ---                                       | 1.59          | 1.35            | 1.17      | 1.43        | 1.77      | 1.62        | 1.38       | 1.71         | -1.43      | -1.08        | -1.32      | -1.14        |
| PSPC1     | paraspeckle component 1         | chr13q12.11          | transcription, DNA-dependent              | ---                                       | -1.02         | -1.30           | 1.02      | 1.16        | -1.07     | -1.24       | -1.08      | 1.10         | -1.53      | -1.59        | -1.54      | -1.23        |
| PSPC1     | paraspeckle component 1         | chr13q12.11          | transcription, DNA-dependent              | ---                                       | 1.03          | 1.06            | 1.08      | -1.05       | 1.21      | 1.06        | -1.04      | -1.12        | -1.71      | -1.84        | 1.15       | -1.10        |
| PSPC1     | paraspeckle component 1         | chr13q12.11          | transcription, DNA-dependent              | ---                                       | 1.06          | 1.02            | 1.21      | 1.24        | -1.04     | -1.06       | -1.10      | -1.15        | 1.07       | -1.18        | 1.14       | 1.36         |
| PSPC1     | paraspeckle component 1         | chr13q12.11          | transcription, DNA-dependent              | ---                                       | 1.58          | 1.78            | 1.09      | 1.02        | 1.06      | 1.03        | -1.36      | -1.35        | -2.18      | -2.55        | -1.33      | -1.93        |
| PSPH      | phosphoserine phosphatase       | chr7p11.2            | L-serine metabolic process                | ---                                       | -1.00         | 1.06            | -1.06     | -1.05       | -1.02     | -1.05       | -1.09      | -1.10        | 1.19       | 1.25         | 1.20       | 1.14         |
| PSPH      | phosphoserine phosphatase       | chr7p11.2            | L-serine metabolic process                | ---                                       | 1.14          | 1.22            | -1.12     | -1.17       | -1.06     | 1.14        | -1.27      | -1.21        | -1.46      | -1.29        | -1.22      | -1.42        |
| PSRC1     | proline-serine-rich coiled-coil | chr1p13.3            | microtubule bundle formation              | ---                                       | -1.07         | -1.10           | 1.05      | 1.14        | 1.06      | 1.04        | -1.26      | -1.10        | 1.38       | 1.18         | 1.37       | 1.50         |
| PSTPIP2   | proline-serine-threonine ph     | chr18q12             | 0                                         | ---                                       | -1.03         | 1.02            | 1.03      | -1.12       | -1.04     | -1.02       | -1.18      | -1.08        | -1.55      | -1.62        | 1.03       | -1.10        |
| PTAR1     | protein prenyltransferase al    | chr9q21.12           | protein prenylation                       | ---                                       | 1.12          | 1.17            | -1.05     | -1.02       | 1.04      | 1.05        | -1.14      | -1.05        | -1.71      | -1.54        | -1.64      | -1.54        |
| PTAR1     | protein prenyltransferase al    | chr9q21.12           | protein prenylation                       | ---                                       | 1.13          | 1.13            | 1.36      | 1.34        | -1.39     | -1.01       | -1.00      | 1.04         | -1.91      | -2.02        | -1.30      | -1.50        |
| PTBP2     | polypyrimidine tract bindin     | chr1p21.3            | mRNA splice site selection                | mRNA_processing_Reactome // GenMAPP       | 1.42          | 1.20            | -1.03     | -1.28       | 1.09      | 1.26        | -1.24      | -1.07        | -1.65      | -1.28        | -1.60      | -2.10        |
| PTBP3     | polypyrimidine tract bindin     | chr9q32              | mRNA processing                           | ---                                       | -1.25         | -1.24           | -1.07     | 1.03        | 1.28      | 1.15        | 1.02       | -1.15        | 1.31       | 1.11         | 2.23       | 1.75         |
| PTBP3     | polypyrimidine tract bindin     | chr9q32              | mRNA processing                           | ---                                       | 1.34          | -1.02           | 1.19      | -1.06       | -1.15     | 1.02        | -1.31      | 1.03         | -1.07      | 1.07         | 1.27       | 1.17         |
| PTBP3     | polypyrimidine tract bindin     | chr9q32              | mRNA processing                           | ---                                       | 1.08          | 1.06            | 1.03      | -1.01       | -1.02     | 1.04        | -1.09      | -1.02        | -1.03      | 1.22         | 1.25       | 1.11         |
| PTCD2     | pentatricopeptide repeat do     | chr5q13.2            | kidney development                        | ---                                       | 1.14          | 1.13            | 1.03      | -1.01       | -1.05     | 1.14        | 1.04       | -1.09        | -1.31      | -1.14        | 1.08       | 1.08         |
| PTCD3     | pentatricopeptide repeat do     | chr2p11.2            | regulation of translation                 | ---                                       | -1.09         | -1.03           | -1.36     | -1.23       | -1.05     | 1.11        | -1.05      | -1.20        | -1.24      | -2.07        | -1.48      | -1.48        |
| PTCD3     | pentatricopeptide repeat do     | chr2p11.2            | regulation of translation                 | ---                                       | 1.01          | 1.11            | 1.19      | 1.23        | 1.08      | 1.05        | 1.06       | 1.13         | -1.67      | -1.70        | -1.27      | -1.28        |
| PTCH1     | patched 1                       | chr9q22.3            | negative regulation of transcription from | ---                                       | -1.07         | -1.09           | -1.09     | -1.06       | -1.04     | 1.00        | 1.06       | 1.10         | -1.78      | -1.20        | -1.44      | -1.33        |

| ID          | Gene Title                  | Chromosomal Location | 1st Gene Ontology Biological Process      | Pathway                                   | A2497 30 mins | A2497P' 30 mins | A2497 2 h | A2497P' 2 h | A2497 4 h | A2497P' 4 h | A2497 24 h | A2497P' 24 h | A2497 48 h | A2497P' 48 h | A2497 72 h | A2497P' 72 h |
|-------------|-----------------------------|----------------------|-------------------------------------------|-------------------------------------------|---------------|-----------------|-----------|-------------|-----------|-------------|------------|--------------|------------|--------------|------------|--------------|
| PTCH1       | patched 1                   | chr9q22.3            | negative regulation of transcription from | ---                                       | -1.23         | -1.21           | 1.03      | -1.02       | -1.24     | 1.22        | -1.63      | -1.02        | -2.21      | -1.92        | -1.31      | -1.32        |
| PTCHD1      | patched domain containing   | chrXp22.11           | smoothed signaling pathway                | ---                                       | 3.69          | 4.93            | -2.68     | -3.29       | -2.12     | 1.21        | 1.28       | 3.06         | 9.11       | 1.20         | -1.35      | 2.34         |
| PTCHD1      | patched domain containing   | chrXp22.11           | smoothed signaling pathway                | ---                                       | -1.25         | -1.47           | 1.28      | -4.86       | 1.22      | 1.89        | -1.72      | -1.71        | 1.84       | 2.43         | 1.28       | 3.65         |
| PTCHD3P1    | patched domain containing   | chr10p11.23          | 0                                         | ---                                       | -1.05         | 1.03            | 1.11      | 1.05        | -1.06     | -1.03       | -1.83      | -1.14        | -1.65      | -1.17        | 1.25       | 1.16         |
| PTCHD3P1    | patched domain containing   | chr10p11.23          | 0                                         | ---                                       | 1.10          | 1.05            | 1.02      | 1.03        | 1.13      | -1.13       | -1.21      | -1.05        | 1.14       | -1.15        | 1.38       | 1.16         |
| PTDSS1      | phosphatidyserine synthase  | chr8q22              | lipid metabolic process                   | ---                                       | 1.01          | 1.04            | -1.06     | -1.08       | -1.02     | 1.03        | -1.01      | -1.03        | -1.03      | -1.02        | -1.13      | -1.13        |
| PTEN        | phosphatase and tensin hom  | chr10q23.3           | regulation of cyclin-dependent protein se | ---                                       | -1.03         | -1.01           | 1.04      | 1.00        | 1.07      | -1.02       | 1.27       | 1.10         | 1.32       | 1.34         | 1.61       | 1.76         |
| PTEN        | phosphatase and tensin hom  | chr10q23.3           | regulation of cyclin-dependent protein se | ---                                       | -1.02         | 1.01            | -1.01     | 1.02        | 1.08      | 1.06        | -1.00      | 1.02         | -1.41      | -1.22        | -1.36      | -1.26        |
| PTEN        | phosphatase and tensin hom  | chr10q23.3           | regulation of cyclin-dependent protein se | ---                                       | -1.12         | -1.01           | 1.23      | -1.25       | -1.11     | 1.03        | 1.01       | -1.21        | -1.61      | -1.64        | -1.88      | -1.95        |
| PTEN        | phosphatase and tensin hom  | chr10q23.3           | regulation of cyclin-dependent protein se | ---                                       | -1.00         | 1.05            | -1.01     | -1.06       | -1.01     | 1.05        | 1.17       | -1.05        | -1.46      | -1.35        | -1.31      | -1.38        |
| PTEN        | phosphatase and tensin hom  | chr10q23.3           | regulation of cyclin-dependent protein se | ---                                       | 1.00          | -1.03           | 1.04      | 1.02        | -1.14     | -1.05       | -1.08      | -1.04        | -1.52      | -1.26        | -1.49      | -1.42        |
| PTEN        | phosphatase and tensin hom  | chr10q23.3           | regulation of cyclin-dependent protein se | ---                                       | -1.00         | -1.12           | 1.06      | -1.25       | 1.07      | -1.12       | 1.62       | 1.11         | 1.16       | 1.14         | 2.00       | 1.69         |
| PTEN // PTE | phosphatase and tensin hom  | chr10q23.3 // chr9p  | regulation of cyclin-dependent protein se | ---                                       | -1.02         | -1.04           | 1.07      | 1.07        | 1.05      | -1.01       | 1.31       | 1.16         | 1.34       | 1.30         | 1.68       | 1.71         |
| PTENP1      | phosphatase and tensin hom  | chr9p21              | protein dephosphorylation                 | ---                                       | 1.02          | -1.04           | -1.01     | -1.03       | 1.05      | 1.02        | -1.05      | -1.19        | 1.09       | 1.09         | 1.73       | 1.53         |
| PTGDR2      | prostaglandin D2 receptor   | chr11q12-q13.3       | chemotaxis                                | GPCRDB_Class_A_Rhodopsin-like // GenM     | 1.31          | 1.11            | 1.17      | 1.31        | -2.39     | -1.30       | 1.16       | 1.09         | -1.06      | 1.32         | 1.27       | 1.24         |
| PTGDS       | prostaglandin D2 synthase   | chr9q34.2-q34.3      | prostaglandin biosynthetic process        | Eicosanoid_Synthesis // GenMAPP // Prosta | 2.11          | 1.40            | 2.07      | 2.22        | -2.64     | 1.07        | -1.66      | -1.29        | 2.29       | 2.09         | 2.00       | 3.07         |
| PTGDS       | prostaglandin D2 synthase   | chr9q34.2-q34.3      | prostaglandin biosynthetic process        | Eicosanoid_Synthesis // GenMAPP // Prosta | 2.69          | 2.92            | -1.63     | 1.50        | 1.01      | 1.06        | -1.88      | -1.54        | 1.97       | 1.20         | 1.75       | 2.09         |
| PTGER2      | prostaglandin E receptor 2  | chr14q22             | signal transduction                       | GPCRDB_Class_A_Rhodopsin-like // GenM     | 1.24          | 1.17            | 1.38      | -1.10       | 1.49      | 1.47        | -1.36      | -1.05        | -1.15      | -1.23        | 1.26       | -1.27        |
| PTGER3      | prostaglandin E receptor 3  | chr1p31.2            | transcription, DNA-dependent              | ---                                       | -1.71         | -2.89           | -2.65     | 1.89        | -1.50     | 1.92        | -1.67      | -5.16        | -2.18      | 1.48         | 1.12       | 6.84         |
| PTGER4      | prostaglandin E receptor 4  | chr5p13.1            | immune response                           | GPCRDB_Class_A_Rhodopsin-like // GenM     | 1.25          | 1.11            | 1.09      | 1.12        | 1.09      | 1.07        | 1.66       | 1.49         | 1.65       | 1.13         | 2.46       | 1.79         |
| PTGES       | prostaglandin E synthase    | chr9q34.3            | prostaglandin biosynthetic process        | Eicosanoid_Synthesis // GenMAPP           | -1.08         | -1.09           | -1.09     | -1.02       | -1.05     | 1.02        | 1.03       | -1.01        | 1.14       | -1.00        | 1.06       | -1.22        |
| PTGES2      | prostaglandin E synthase 2  | chr9q34.11           | prostaglandin biosynthetic process        | ---                                       | 1.10          | -1.05           | 1.03      | 1.16        | -1.03     | -1.12       | 1.26       | 1.10         | -1.01      | -1.09        | -1.52      | -1.37        |
| PTGFRN      | prostaglandin F2 receptor   | chr1p13.1            | lipid particle organization               | ---                                       | -1.03         | 1.02            | -1.08     | -1.12       | 1.05      | 1.03        | 1.20       | 1.06         | 1.09       | 1.17         | 1.25       | 1.20         |
| PTGR1       | prostaglandin reductase 1   | chr9q31.3            | leukotriene metabolic process             | ---                                       | 1.08          | 1.04            | -1.01     | 1.01        | 1.05      | 1.08        | -1.03      | 1.02         | 1.47       | 1.22         | -1.13      | -1.37        |
| PTGR1       | prostaglandin reductase 1   | chr9q31.3            | leukotriene metabolic process             | ---                                       | -1.06         | 1.01            | -1.04     | 1.04        | -1.01     | -1.01       | 1.02       | -1.01        | 1.15       | 1.17         | -1.10      | -1.02        |
| PTGR2       | prostaglandin reductase 2   | chr14q24.3           | prostaglandin metabolic process           | ---                                       | 1.58          | 1.20            | 1.18      | 1.15        | -1.15     | 1.16        | -1.11      | 1.07         | -1.47      | -1.08        | -1.53      | -1.95        |
| PTGS1       | prostaglandin-endoperoxid   | chr9q32-q33.3        | prostaglandin biosynthetic process        | Eicosanoid_Synthesis // GenMAPP // Prosta | -1.10         | -1.18           | 1.09      | 1.16        | 1.09      | -1.00       | 1.12       | 1.15         | 1.48       | 1.60         | 1.26       | 1.72         |
| PTGS1       | prostaglandin-endoperoxid   | chr9q32-q33.3        | prostaglandin biosynthetic process        | Eicosanoid_Synthesis // GenMAPP // Prosta | -1.05         | -1.15           | 1.01      | 1.20        | -1.05     | 1.01        | 1.06       | 1.14         | 1.30       | 1.52         | 1.24       | 1.67         |
| PTGS1       | prostaglandin-endoperoxid   | chr9q32-q33.3        | prostaglandin biosynthetic process        | Eicosanoid_Synthesis // GenMAPP // Prosta | -1.10         | -1.10           | -1.00     | 1.09        | 1.11      | 1.05        | 1.23       | 1.15         | 2.18       | 2.33         | 2.67       | 3.31         |
| PTGS1       | prostaglandin-endoperoxid   | chr9q32-q33.3        | prostaglandin biosynthetic process        | Eicosanoid_Synthesis // GenMAPP // Prosta | 2.27          | 3.62            | -2.41     | -1.29       | -1.23     | -1.09       | -1.18      | 1.04         | 2.33       | 2.81         | 3.85       | 4.94         |
| PTGS2       | prostaglandin-endoperoxid   | chr1q25.2-q25.3      | prostaglandin biosynthetic process        | Eicosanoid_Synthesis // GenMAPP // Prosta | 1.19          | 1.77            | -1.13     | -1.36       | 1.11      | -2.50       | 2.54       | 2.05         | 12.92      | 8.08         | 13.77      | 7.65         |
| PTGS2       | prostaglandin-endoperoxid   | chr1q25.2-q25.3      | prostaglandin biosynthetic process        | Eicosanoid_Synthesis // GenMAPP // Prosta | 2.10          | 2.27            | 1.11      | -1.12       | 1.02      | 1.16        | 1.03       | 1.12         | 5.47       | 3.51         | 8.24       | 4.15         |
| PTK2        | protein tyrosine kinase 2   | chr8q24.3            | MAPK cascade                              | Integrin-mediated_cell_adhesion_KEGG // C | -1.27         | -1.02           | -1.05     | -1.40       | 1.32      | -1.11       | -1.09      | -1.45        | -1.31      | -1.15        | -1.01      | -1.11        |
| PTK2        | protein tyrosine kinase 2   | chr8q24.3            | MAPK cascade                              | Integrin-mediated_cell_adhesion_KEGG // C | 1.40          | -1.17           | 1.35      | -1.05       | -1.01     | 1.23        | -1.14      | -1.14        | 2.74       | 2.70         | 2.78       | 2.90         |
| PTK2        | protein tyrosine kinase 2   | chr8q24.3            | MAPK cascade                              | Integrin-mediated_cell_adhesion_KEGG // C | 1.00          | 1.04            | -1.18     | -1.20       | -1.21     | -1.00       | -1.24      | -1.17        | -1.07      | -1.02        | 1.25       | 1.19         |
| PTK6        | protein tyrosine kinase 6   | chr20q13.3           | protein phosphorylation                   | ---                                       | -2.89         | -1.80           | -1.06     | 1.19        | -1.03     | 1.05        | 1.30       | 1.24         | 1.48       | 2.13         | 2.27       | 2.84         |
| PTK6        | protein tyrosine kinase 6   | chr20q13.3           | protein phosphorylation                   | ---                                       | 1.74          | 1.14            | 1.26      | 1.27        | 1.21      | -1.13       | 1.21       | 1.33         | 2.14       | 2.55         | 1.36       | 1.89         |
| PTMA        | prothymosin, alpha          | chr2q37.1            | transcription, DNA-dependent              | ---                                       | 1.06          | 1.16            | -1.07     | -1.13       | -1.14     | -1.06       | -1.05      | -1.09        | 1.03       | -1.01        | -1.08      | -1.24        |
| PTPA41      | protein tyrosine phosphatas | chr6q12              | protein dephosphorylation                 | ---                                       | -1.00         | 1.10            | -1.02     | -1.09       | 1.03      | -1.01       | 1.17       | 1.09         | 1.82       | 1.83         | 1.43       | 1.20         |
| PTPA42      | protein tyrosine phosphatas | chr1p35              | protein dephosphorylation                 | ---                                       | -1.02         | -1.00           | -1.05     | 1.01        | 1.05      | 1.01        | 1.13       | 1.05         | 1.35       | 1.12         | 1.16       | 1.14         |
| PTPA42      | protein tyrosine phosphatas | chr1p35              | protein dephosphorylation                 | ---                                       | 1.17          | 1.24            | -1.01     | -1.07       | -1.21     | -1.05       | -1.28      | -1.20        | -1.16      | -1.16        | -1.21      | -1.34        |
| PTPA43      | protein tyrosine phosphatas | chr8q24.3            | protein dephosphorylation                 | ---                                       | -2.01         | -1.06           | -1.61     | -1.12       | -1.16     | 1.30        | 2.09       | 1.22         | 1.66       | 1.92         | 1.54       | 1.56         |
| PTPA43      | protein tyrosine phosphatas | chr8q24.3            | protein dephosphorylation                 | ---                                       | -1.36         | -1.20           | -1.00     | -1.33       | -1.51     | -1.30       | 1.70       | 1.40         | 1.11       | 1.38         | 1.09       | 1.18         |
| PTPLAD1     | protein tyrosine phosphatas | chr15q22.2           | lipid metabolic process                   | ---                                       | 1.10          | 1.06            | -1.04     | -1.18       | 1.06      | -1.06       | -1.23      | -1.14        | -1.15      | -1.03        | 1.37       | 1.11         |
| PTPLAD1     | protein tyrosine phosphatas | chr15q22.2           | lipid metabolic process                   | ---                                       | 1.14          | 1.09            | 1.07      | 1.14        | 1.06      | 1.12        | -1.07      | -1.12        | -1.05      | -1.00        | 1.37       | 1.24         |
| PTPLAD2     | protein tyrosine phosphatas | chr9p21.3            | lipid metabolic process                   | ---                                       | 1.26          | 1.13            | 1.34      | 1.30        | -1.15     | -1.21       | 1.18       | 1.04         | -1.86      | -1.20        | -3.31      | -1.96        |
| PTPLB       | protein tyrosine phosphatas | chr3q21.1            | lipid metabolic process                   | ---                                       | 1.05          | 1.12            | -1.03     | -1.08       | -1.11     | 1.01        | -1.18      | -1.18        | -1.75      | -1.43        | -1.31      | -1.55        |
| PTPMT1      | protein tyrosine phosphatas | chr11p11.2           | protein dephosphorylation                 | Electron_Transport_Chain // GenMAPP       | 1.11          | -1.02           | 1.01      | 1.14        | -1.00     | -1.06       | 1.01       | 1.06         | -1.05      | -1.18        | -1.34      | -1.18        |
| PTPMT1      | protein tyrosine phosphatas | chr11p11.2           | protein dephosphorylation                 | Electron_Transport_Chain // GenMAPP       | -1.06         | -1.05           | 1.07      | -1.06       | -1.00     | -1.06       | 1.10       | -1.06        | 1.17       | 1.17         | 1.37       | 1.23         |
| PTPN11      | protein tyrosine phosphatas | chr12q24             | DNA damage checkpoint                     | ---                                       | -1.00         | 1.14            | 1.03      | -1.04       | -1.20     | -1.22       | 1.15       | 1.14         | 1.28       | 1.10         | 1.39       | 1.35         |
| PTPN12      | protein tyrosine phosphatas | chr7q11.23           | protein dephosphorylation                 | ---                                       | 1.20          | -1.01           | -1.01     | 1.03        | -1.10     | 1.08        | -1.13      | -1.02        | 1.06       | 1.27         | 1.42       | 1.34         |
| PTPN12      | protein tyrosine phosphatas | chr7q11.23           | protein dephosphorylation                 | ---                                       | -1.02         | -1.03           | 1.38      | -1.04       | 1.03      | 1.07        | 1.65       | 1.76         | 1.17       | -1.02        | 1.97       | 1.36         |
| PTPN13      | protein tyrosine phosphatas | chr4q21.3            | protein dephosphorylation                 | Apoptosis_KEGG // GenMAPP                 | 1.06          | -1.03           | 1.10      | 1.07        | 1.16      | 1.09        | -1.06      | -1.03        | -1.91      | -1.72        | -1.95      | -1.89        |
| PTPN13      | protein tyrosine phosphatas | chr4q21.3            | protein dephosphorylation                 | ---                                       | 1.69          | 1.09            | 1.05      | -1.19       | -1.05     | -1.04       | -1.36      | -1.10        | -1.75      | -1.09        | -2.39      | -2.61        |
| PTPN14      | protein tyrosine phosphatas | chr1q32.2            | lymphangiogenesis                         | ---                                       | -1.16         | -1.07           | 1.15      | 1.16        | -1.08     | -1.04       | 1.05       | -1.10        | 3.11       | 2.89         | 1.67       | 1.88         |
| PTPN14      | protein tyrosine phosphatas | chr1q32.2            | lymphangiogenesis                         | ---                                       | 1.11          | 1.14            | -1.03     | -1.12       | -1.04     | -1.00       | -1.23      | -1.11        | -1.81      | -1.43        | -1.48      | -1.63        |
| PTPN14      | protein tyrosine phosphatas | chr1q32.2            | lymphangiogenesis                         | ---                                       | 1.19          | 1.08            | 1.08      | -1.12       | -1.17     | 1.01        | -1.46      | -1.30        | -1.72      | -1.26        | -1.51      | -1.45        |
| PTPN18      | protein tyrosine phosphatas | chr2q21.1            | protein dephosphorylation                 | ---                                       | 1.18          | -1.08           | -1.01     | 1.08        | 1.06      | -1.04       | 1.20       | -1.20        | -1.28      | -1.12        | -1.17      | -1.16        |
| PTPN18      | protein tyrosine phosphatas | chr2q21.1            | protein dephosphorylation                 | ---                                       | 1.01          | -1.08           | -1.11     | 1.28        | -1.12     | 1.00        | 1.07       | -1.23        | -1.23      | -1.23        | -1.57      | -1.30        |
| PTPN2       | protein tyrosine phosphatas | chr18p11.3-p11.2     | protein dephosphorylation                 | ---                                       | 1.00          | -1.02           | -1.03     | 1.07        | -1.05     | 1.05        | 1.13       | 1.17         | 1.21       | 1.16         | 1.34       | 1.44         |
| PTPN2       | protein tyrosine phosphatas | chr18p11.3-p11.2     | protein dephosphorylation                 | ---                                       | -1.02         | -1.01           | -1.02     | -1.00       | 1.01      | -1.07       | 1.28       | 1.17         | 1.51       | 1.16         | 1.37       | 1.36         |
| PTPN21      | protein tyrosine phosphatas | chr14q31.3           | protein dephosphorylation                 | ---                                       | -1.03         | -1.31           | 1.31      | -1.20       | -1.02     | -1.04       | 1.20       | 1.40         | 1.18       | -2.03        | 1.98       | 1.44         |
| PTPN21      | protein tyrosine phosphatas | chr14q31.3           | protein dephosphorylation                 | ---                                       | 1.52          | 1.49            | 1.18      | -1.05       | 1.08      | 1.11        | -1.26      | -1.21        | -3.45      | -3.60        | -1.80      | -2.00        |
| PTPN23      | protein tyrosine phosphatas | chr3p21.3            | protein dephosphorylation                 | ---                                       | -1.18         | 1.13            | -1.16     | 1.21        | 1.04      | -1.04       | 1.18       | -1.07        | -1.05      | 1.60         | 1.31       | 1.31         |
| PTPN3       | protein tyrosine phosphatas | chr9q31              | protein dephosphorylation                 | ---                                       | 1.16          | -1.01           | 1.24      | -1.53       | 1.08      | 1.09        | 1.23       | 1.26         | -1.72      | -1.35        | -1.30      | -1.52        |
| PTPN4       | protein tyrosine phosphatas | chr2q14.2            | protein dephosphorylation                 | ---                                       | 1.12          | -1.11           | -1.02     | -1.11       | 1.19      | 1.20        | -1.49      | 1.10         | -4.06      | -1.89        | -2.82      | -2.32        |

| ID      | Gene Title                       | Chromosomal Location | 1st Gene Ontology Biological Process         | Pathway                             | A2497 30 mins | A2497P' 30 mins | A2497 2 h | A2497P' 2 h | A2497 4 h | A2497P' 4 h | A2497 24 h | A2497P' 24 h | A2497 48 h | A2497P' 48 h | A2497 72 h | A2497P' 72 h |
|---------|----------------------------------|----------------------|----------------------------------------------|-------------------------------------|---------------|-----------------|-----------|-------------|-----------|-------------|------------|--------------|------------|--------------|------------|--------------|
| PTPN4   | protein tyrosine phosphatase     | chr2q14.2            | protein dephosphorylation                    | ---                                 | 1.01          | -1.19           | 1.37      | 1.28        | -1.43     | 1.15        | -2.08      | -1.72        | -2.43      | -2.32        | -2.08      | -2.54        |
| PTPN4   | protein tyrosine phosphatase     | chr2q14.2            | protein dephosphorylation                    | ---                                 | 1.02          | 1.03            | -1.10     | 1.06        | 1.27      | 1.12        | 1.02       | -1.06        | 1.06       | 1.00         | -1.02      | 1.08         |
| PTPN4   | protein tyrosine phosphatase     | chr2q14.2            | protein dephosphorylation                    | ---                                 | -1.42         | 1.09            | 1.27      | 1.27        | -1.37     | -1.18       | -1.77      | -1.57        | -1.44      | -2.06        | -1.23      | -1.21        |
| PTPN9   | protein tyrosine phosphatase     | chr15q24.2           | protein dephosphorylation                    | ---                                 | 1.06          | 1.15            | 1.03      | -1.21       | -1.13     | -1.12       | 1.00       | -1.02        | 1.00       | -1.42        | -1.46      | -1.61        |
| PTPRA   | protein tyrosine phosphatase     | chr20p13             | protein phosphorylation                      | Cell_cycle_KEGG // GenMAPP          | 1.07          | 1.11            | 1.03      | 1.15        | 1.09      | -1.00       | 1.02       | 1.13         | -1.24      | 1.03         | -1.27      | -1.44        |
| PTPRB   | protein tyrosine phosphatase     | chr12q15-q21         | angiogenesis                                 | ---                                 | -1.13         | -1.18           | -1.06     | 1.19        | 1.04      | -1.16       | 1.27       | 1.19         | -1.85      | -1.78        | -1.68      | -1.15        |
| PTPRB   | protein tyrosine phosphatase     | chr12q15-q21         | angiogenesis                                 | ---                                 | 1.06          | -1.63           | 1.10      | -1.28       | 1.15      | 1.23        | -1.35      | -1.02        | -3.88      | -3.15        | -1.77      | -1.71        |
| PTPRB   | protein tyrosine phosphatase     | chr12q15-q21         | angiogenesis                                 | ---                                 | -1.10         | -1.15           | 1.07      | -1.07       | -1.07     | 1.06        | 1.75       | 1.27         | -1.06      | 1.06         | 1.32       | 1.44         |
| PTPRC   | protein tyrosine phosphatase     | chr1q31-q32          | activation of MAPK activity                  | ---                                 | -3.00         | 1.41            | -1.08     | 1.47        | -7.78     | -1.29       | -2.92      | 1.45         | -1.73      | -2.73        | 2.19       | 1.03         |
| PTPRD   | protein tyrosine phosphatase     | chr9p23-p24.3        | protein dephosphorylation                    | ---                                 | -1.82         | 1.16            | -1.14     | 1.53        | -2.28     | -1.46       | 1.60       | 1.69         | 3.01       | 3.91         | 1.37       | 1.18         |
| PTPRE   | protein tyrosine phosphatase     | chr10q26             | protein dephosphorylation                    | ---                                 | 1.33          | -1.12           | 1.26      | 1.50        | 1.34      | 1.67        | -1.29      | 1.22         | -1.19      | 1.46         | 1.44       | 2.23         |
| PTPRF   | protein tyrosine phosphatase     | chr1p34              | negative regulation of cytokine-mediated     | ---                                 | 1.04          | -1.09           | 1.07      | 1.05        | 1.06      | 1.17        | 1.16       | 1.03         | 1.50       | 1.31         | 1.24       | 1.28         |
| PTPRF   | protein tyrosine phosphatase     | chr1p34              | negative regulation of cytokine-mediated     | ---                                 | 1.08          | 1.03            | 1.02      | -1.07       | -1.02     | -1.01       | 1.12       | 1.16         | 1.36       | 1.16         | 1.26       | 1.26         |
| PTPRF   | protein tyrosine phosphatase     | chr1p34              | negative regulation of cytokine-mediated     | ---                                 | -1.05         | 1.15            | -1.07     | 1.16        | 1.05      | 1.10        | 1.30       | 1.27         | 1.99       | 1.55         | 1.11       | -1.04        |
| PTPRG   | protein tyrosine phosphatase     | chr3p21-p14          | protein dephosphorylation                    | ---                                 | 1.01          | 1.08            | 4.60      | 1.49        | 1.23      | 1.61        | 1.07       | -3.65        | 3.08       | 1.56         | -2.44      | 1.15         |
| PTPRJ   | protein tyrosine phosphatase     | chr11p11.2           | vasculogenesis                               | ---                                 | 1.04          | 1.05            | 1.08      | -1.07       | -1.07     | 1.06        | 1.05       | -1.46        | -1.51      | -1.39        | -1.88      | ---          |
| PTPRK   | protein tyrosine phosphatase     | chr6q22.2-q22.3      | protein dephosphorylation                    | ---                                 | -1.04         | -1.01           | 1.03      | 1.04        | 1.07      | -1.03       | 1.12       | 1.09         | -1.06      | -1.05        | -1.05      | -1.02        |
| PTPRM   | protein tyrosine phosphatase     | chr18p11.2           | negative regulation of endothelial cell pr   | ---                                 | 1.11          | 1.14            | 1.15      | 1.08        | 1.09      | 1.06        | 1.20       | 1.17         | 1.17       | 1.17         | 1.47       | 1.70         |
| PTPRM   | protein tyrosine phosphatase     | chr18p11.2           | negative regulation of endothelial cell pr   | ---                                 | 1.01          | 1.01            | 1.06      | 1.08        | -1.06     | -1.01       | -1.09      | 1.07         | 1.35       | 1.25         | 1.31       | 1.37         |
| PTPRO   | protein tyrosine phosphatase     | chr12p13.3-p13.211   | cell morphogenesis                           | Electron_Transport_Chain // GenMAPP | -1.05         | -1.01           | -1.10     | 1.03        | -1.01     | -1.05       | -1.01      | 1.04         | 1.01       | -1.02        | -1.07      | 1.02         |
| PTPRR   | protein tyrosine phosphatase     | chr12q15             | in utero embryonic development               | ---                                 | -1.18         | 1.14            | -1.34     | -1.03       | 1.12      | 1.20        | -1.10      | 1.13         | -1.34      | -1.09        | 3.63       | 2.90         |
| PTPRR   | protein tyrosine phosphatase     | chr12q15             | in utero embryonic development               | ---                                 | 1.50          | 1.23            | -1.06     | -1.13       | -1.07     | 1.14        | 1.08       | 1.17         | -1.21      | -1.02        | 4.35       | 4.49         |
| PTRF    | polymerase I and transcript      | chr17q21.2           | transcription, DNA-dependent                 | ---                                 | 1.16          | 1.07            | -1.19     | -1.09       | -1.03     | 1.02        | 1.03       | -1.03        | -1.07      | -1.01        | -1.00      | -1.15        |
| PTRH1   | peptidyl-L-prolyl isomerase      | chr9q34.11           | 0                                            | ---                                 | -1.02         | -1.08           | 1.02      | -1.12       | 1.10      | -1.00       | 1.18       | 1.06         | 1.60       | 1.49         | 1.15       | 1.15         |
| PTRH2   | peptidyl-L-prolyl isomerase      | chr17q23.1           | apoptotic process                            | ---                                 | -1.03         | -1.02           | 1.05      | 1.15        | 1.03      | -1.05       | 1.20       | 1.09         | 1.67       | 1.25         | 1.74       | 1.77         |
| PTRHD1  | peptidyl-L-prolyl isomerase      | chr2p23.3            | protein dephosphorylation                    | ---                                 | 1.08          | 1.03            | 1.02      | -1.06       | 1.07      | 1.07        | -1.26      | -1.07        | -1.07      | -1.01        | -1.16      | -1.08        |
| PTS     | 6-pyruvoyltetrahydropterin       | chr11q22.3           | cellular amino acid metabolic process        | ---                                 | -1.02         | -1.02           | -1.01     | 1.03        | -1.04     | 1.01        | 1.03       | -1.00        | 1.34       | 1.15         | 1.10       | 1.00         |
| PTTG1   | pituitary tumor-transformin      | chr5q35.1            | mitotic cell cycle                           | Cell_cycle_KEGG // GenMAPP          | -1.06         | 1.01            | -1.02     | -1.03       | 1.02      | -1.05       | 1.02       | 1.02         | 1.43       | 1.27         | 1.31       | 1.28         |
| PTX3    | pentraxin 3, long                | chr3q25              | response to yeast                            | ---                                 | -1.13         | 1.00            | -1.03     | 1.19        | 1.15      | 1.15        | 1.17       | 1.49         | 4.87       | 3.19         | 4.41       | 4.17         |
| PUF60   | poly-U binding splicing fac      | chr8q24.3            | transcription, DNA-dependent                 | ---                                 | -1.06         | -1.06           | -1.02     | 1.04        | 1.07      | -1.01       | 1.26       | 1.09         | 1.28       | 1.06         | 1.42       | 1.35         |
| PUM1    | pumilio homolog 1 (Drosophila)   | chr1p35.2            | regulation of translation                    | ---                                 | 1.13          | 1.11            | 1.06      | 1.10        | -1.02     | -1.10       | -1.23      | 1.05         | -1.38      | -1.22        | -1.15      | -1.20        |
| PUM2    | pumilio homolog 2 (Drosophila)   | chr2p22-p21          | regulation of translation                    | ---                                 | -1.06         | -1.04           | -1.00     | 1.05        | 1.02      | 1.13        | -1.08      | -1.03        | -1.40      | -1.10        | -1.10      | -1.18        |
| PURA    | purine-rich element binding      | chr5q31              | DNA unwinding involved in replication        | Circadian_Exercise // GenMAPP       | 1.00          | 1.02            | 1.04      | -1.12       | 1.00      | 1.06        | -1.29      | -1.22        | -1.64      | -1.34        | -1.24      | -1.24        |
| PURA    | purine-rich element binding      | chr5q31              | DNA unwinding involved in replication        | ---                                 | -1.14         | -1.14           | 1.18      | -1.11       | 1.09      | 1.02        | -1.12      | -1.11        | -1.29      | -1.29        | -1.10      | -1.04        |
| PURB    | purine-rich element binding      | chr7p13              | transcription, DNA-dependent                 | ---                                 | 1.01          | -1.04           | -1.06     | 1.02        | -1.02     | -1.04       | -1.04      | 1.00         | -1.07      | -1.13        | -1.31      | -1.15        |
| PURB    | purine-rich element binding      | chr7p13              | transcription, DNA-dependent                 | ---                                 | -1.09         | -1.06           | -1.08     | 1.05        | -1.09     | 1.06        | -1.53      | -1.27        | -1.01      | -1.00        | -1.47      | -1.21        |
| PURB    | purine-rich element binding      | chr7p13              | transcription, DNA-dependent                 | ---                                 | 1.08          | 1.10            | 1.11      | 1.15        | -1.13     | 1.09        | 1.23       | 1.12         | 1.94       | 1.79         | 1.88       | 1.87         |
| PUS3    | pseudouridylate synthase 3       | chr11q24.2           | pseudouridine synthesis                      | ---                                 | -1.10         | -1.09           | 1.07      | -1.00       | 1.08      | -1.05       | 1.11       | 1.11         | 1.19       | 1.14         | 1.21       | 1.24         |
| PUS7    | pseudouridylate synthase 7       | chr7q22.3            | pseudouridine synthesis                      | ---                                 | -1.01         | -1.02           | -1.03     | -1.08       | 1.04      | 1.09        | -1.14      | -1.09        | -1.31      | -1.16        | -1.11      | -1.14        |
| PUS7L   | pseudouridylate synthase 7       | chr12q12             | pseudouridine synthesis                      | ---                                 | 1.13          | 1.38            | 1.17      | -1.08       | 1.04      | -1.06       | -1.12      | -1.02        | -1.32      | -1.42        | -1.49      | -1.58        |
| PUS7L   | pseudouridylate synthase 7       | chr12q12             | pseudouridine synthesis                      | ---                                 | 1.28          | 1.15            | 1.04      | -1.06       | 1.11      | 1.09        | -1.25      | -1.01        | -1.46      | -1.50        | -1.50      | -1.62        |
| PVR     | poliovirus receptor              | chr19q13.2           | positive regulation of natural killer cell m | ---                                 | -1.06         | -1.16           | 1.14      | 1.28        | 1.15      | -1.02       | 1.12       | 1.85         | 1.24       | 1.98         | 2.13       | ---          |
| PVR     | poliovirus receptor              | chr19q13.2           | positive regulation of natural killer cell m | ---                                 | 1.07          | 1.15            | -1.08     | 1.18        | 1.15      | 1.05        | -1.04      | 1.07         | 1.70       | 1.40         | 1.89       | 2.32         |
| PVR     | poliovirus receptor              | chr19q13.2           | positive regulation of natural killer cell m | ---                                 | -1.38         | -1.47           | 1.19      | 1.09        | 1.22      | 1.17        | -1.06      | -1.37        | 2.13       | 1.40         | 2.10       | 2.06         |
| PVR     | poliovirus receptor              | chr19q13.2           | positive regulation of natural killer cell m | ---                                 | 1.53          | 1.69            | 1.06      | -1.01       | -1.29     | -1.15       | 1.11       | 1.28         | 2.10       | 1.45         | 2.32       | 2.27         |
| PVR     | poliovirus receptor              | chr19q13.2           | positive regulation of natural killer cell m | ---                                 | -1.02         | -1.25           | -1.14     | -1.11       | 1.44      | 1.00        | 1.01       | -1.09        | 1.51       | 1.34         | 2.08       | 2.64         |
| PVR     | poliovirus receptor              | chr19q13.2           | positive regulation of natural killer cell m | ---                                 | -1.06         | -1.08           | -1.06     | 1.01        | 1.02      | -1.00       | 1.06       | 1.07         | 1.66       | 1.51         | 1.88       | 1.97         |
| PVR     | poliovirus receptor              | chr19q13.2           | positive regulation of natural killer cell m | ---                                 | -1.02         | 1.01            | 1.18      | 1.14        | 1.61      | 1.32        | 1.09       | -1.00        | 1.98       | 1.64         | 2.30       | 2.12         |
| PVRL2   | poliovirus receptor-related      | chr19q13.2           | acrosome assembly                            | ---                                 | 1.26          | 1.16            | 1.10      | 1.23        | 1.06      | 1.01        | 1.06       | 1.19         | 2.08       | 1.67         | 2.06       | 2.11         |
| PVRL2   | poliovirus receptor-related      | chr19q13.2           | acrosome assembly                            | ---                                 | -1.15         | 1.18            | -1.02     | -1.02       | -1.29     | -1.16       | 1.05       | 1.48         | 1.47       | 1.37         | 1.52       | 1.65         |
| PVRL2   | poliovirus receptor-related      | chr19q13.2           | acrosome assembly                            | ---                                 | -1.06         | 1.18            | 1.68      | 1.41        | 1.51      | 1.42        | 1.15       | -1.14        | 1.20       | 1.15         | 2.17       | 2.38         |
| PVRL2   | poliovirus receptor-related      | chr19q13.2           | acrosome assembly                            | ---                                 | -1.01         | 1.08            | 1.11      | -1.00       | 1.16      | 1.07        | 1.29       | 1.08         | 1.63       | 1.32         | 1.58       | 1.67         |
| PVRL3   | poliovirus receptor-related      | chr3q13              | lens morphogenesis in camera-type eye        | ---                                 | 1.05          | -1.01           | 1.02      | 1.07        | 1.00      | -1.07       | -1.06      | 1.03         | -1.52      | -1.48        | -1.35      | -1.70        |
| PWP1    | PWP1 homolog (S. cerevisiae)     | chr12q23.3           | transcription, DNA-dependent                 | ---                                 | -1.03         | 1.05            | -1.04     | 1.07        | -1.01     | 1.00        | 1.00       | 1.15         | -1.19      | -1.14        | 1.11       | 1.21         |
| PWP1    | PWP1 homolog (S. cerevisiae)     | chr12q23.3           | transcription, DNA-dependent                 | ---                                 | 1.03          | -1.07           | 1.01      | 1.11        | 1.08      | 1.03        | 1.26       | 1.16         | 1.19       | -1.02        | 1.36       | 1.26         |
| PWP2    | PWP2 periodic tryptophan         | chr21q22.3           | signal transduction                          | ---                                 | -1.11         | -1.08           | 1.01      | -1.05       | -1.02     | 1.06        | 1.07       | 1.05         | 1.19       | 1.09         | 1.22       | 1.30         |
| PWWP2A  | PWWP domain containing           | chr5q33.3            | 0                                            | ---                                 | 1.13          | 1.05            | -1.06     | -1.01       | 1.02      | 1.23        | -1.01      | 1.12         | -1.51      | -1.30        | -1.33      | -1.38        |
| PWWP2B  | PWWP domain containing           | chr10q26.3           | 0                                            | ---                                 | 1.05          | -1.07           | -1.09     | -1.06       | 1.17      | -1.04       | 1.08       | 1.30         | 1.68       | 1.23         | 1.29       | 1.28         |
| PWWP2B  | PWWP domain containing           | chr10q26.3           | 0                                            | ---                                 | 1.63          | 1.81            | 2.01      | 1.73        | -2.49     | -1.33       | 1.22       | -4.86        | -2.06      | -3.40        | -5.28      | ---          |
| PXDN    | peroxidasin homolog (Drosophila) | chr2p25              | negative regulation of cytokine-mediated     | ---                                 | -1.04         | -1.05           | 1.07      | -1.10       | 1.07      | 1.02        | 1.01       | 1.06         | -1.29      | -1.15        | -1.48      | -1.36        |
| PXDN    | peroxidasin homolog (Drosophila) | chr2p25              | negative regulation of cytokine-mediated     | ---                                 | 1.01          | 1.02            | -1.02     | 1.05        | -1.01     | -1.05       | 1.06       | 1.04         | 1.04       | -1.06        | -1.25      | -1.16        |
| PXK     | PX domain containing serine      | chr3p14.3            | protein phosphorylation                      | ---                                 | 1.17          | 1.12            | -1.01     | 1.11        | 1.25      | 1.24        | -1.06      | -1.16        | -1.35      | -1.18        | -1.28      | -1.59        |
| PXMP2   | peroxisomal membrane protein     | chr12q24.33          | 0                                            | ---                                 | -1.04         | -1.06           | -1.06     | 1.06        | -1.04     | -1.03       | 1.00       | 1.05         | -1.48      | -1.25        | -3.12      | -2.30        |
| PXMP4   | peroxisomal membrane protein     | chr20q11.22          | 0                                            | ---                                 | -1.08         | -1.12           | -1.46     | -1.42       | 1.17      | 1.24        | 1.08       | 1.23         | -1.13      | -1.13        | 1.63       | 1.48         |
| PXN-AS1 | PXN antisense RNA 1              | ---                  | 0                                            | ---                                 | -1.21         | -1.31           | -1.03     | 1.08        | 1.16      | 1.20        | 1.20       | 1.17         | 1.04       | 1.10         | 1.09       | 1.31         |
| PYCR1   | pyroline-5-carboxylate reductase | chr17q25.3           | proline biosynthetic process                 | ---                                 | 1.01          | -1.05           | 1.06      | 1.18        | 1.01      | -1.03       | 1.05       | 1.03         | 1.51       | 1.27         | 1.40       | 1.59         |

| ID        | Gene Title                  | Chromosomal Location | 1st Gene Ontology Biological Process    | Pathway                             | A2497 30 mins | A2497P' 30 mins | A2497 2 h | A2497P' 2 h | A2497 4 h | A2497P' 4 h | A2497 24 h | A2497P' 24 h | A2497 48 h | A2497P' 48 h | A2497 72 h | A2497P' 72 h |
|-----------|-----------------------------|----------------------|-----------------------------------------|-------------------------------------|---------------|-----------------|-----------|-------------|-----------|-------------|------------|--------------|------------|--------------|------------|--------------|
| PYCR2     | pyrroline-5-carboxylate red | chr1q42.12           | proline biosynthetic process            | ---                                 | -1.19         | -1.18           | -1.09     | -1.15       | 1.09      | -1.03       | 1.01       | -1.07        | 1.08       | 1.06         | 1.12       | 1.26         |
| PYHIN1    | pyrin and HIN domain fam    | chr1q23.1            | cell cycle                              | ---                                 | -3.49         | -1.32           | 2.44      | 1.94        | 2.80      | 1.85        | 1.98       | 1.51         | 2.13       | 1.46         | -4.75      | 1.24         |
| PYROXD1   | pyridine nucleotide-disulph | chr12p12.1           | oxidation-reduction process             | ---                                 | 1.09          | 1.10            | -1.05     | -1.01       | -1.01     | -1.03       | -1.23      | -1.07        | -1.56      | -1.39        | 1.03       | 1.07         |
| PYROXD2   | pyridine nucleotide-disulph | chr10q24.2           | oxidation-reduction process             | ---                                 | 1.13          | -1.00           | -1.21     | 1.06        | 1.47      | 1.08        | 1.14       | 1.25         | -1.33      | -1.36        | -2.16      | -1.38        |
| PZP       | pregnancy-zone protein      | chr12p13-p12.2       | female pregnancy                        | ---                                 | -2.24         | 1.03            | -1.01     | 1.08        | -1.16     | 1.01        | -1.06      | -1.10        | -2.67      | -4.91        | -1.87      | -1.33        |
| QARS      | glutaminyI-tRNA synthetas   | chr3p21.31           | translation                             | ---                                 | -1.23         | -1.22           | 1.02      | 1.18        | 1.05      | 1.00        | 1.00       | -1.09        | 1.10       | 1.03         | -1.32      | -1.15        |
| QDPR      | quinoid dihydropteridine re | chr4p15.31           | liver development                       | ---                                 | -1.07         | 1.02            | 1.09      | -1.01       | 1.04      | -1.08       | -1.05      | -1.03        | 1.06       | -1.09        | -1.30      | -1.12        |
| QKI       | QKI, KH domain containin    | chr6q26              | vasculogenesis                          | ---                                 | -1.08         | -1.09           | 1.07      | 1.08        | -1.12     | 1.21        | -1.12      | -1.15        | -1.54      | -1.39        | -1.19      | -1.29        |
| QPRT      | quinolinate phosphoribosyl  | chr16p11.2           | vitamin metabolic process               | ---                                 | -1.06         | -1.07           | -1.09     | 1.08        | -1.11     | -1.23       | 1.16       | 1.18         | 1.34       | 1.46         | 1.42       | 1.61         |
| QPRT      | quinolinate phosphoribosyl  | chr16p11.2           | vitamin metabolic process               | ---                                 | 1.04          | 1.02            | -1.07     | -1.04       | 1.01      | -1.02       | -1.05      | 1.03         | 1.57       | 1.27         | 1.52       | 1.73         |
| QRSL1     | glutaminyI-tRNA synthase    | chr6q21              | translation                             | ---                                 | 1.13          | 1.11            | -1.01     | -1.04       | -1.04     | 1.14        | 1.05       | 1.18         | -1.69      | -1.64        | -1.78      | -1.73        |
| QSER1     | glutamine and serine rich   | chr11p13             | 0                                       | ---                                 | 1.23          | -1.00           | 1.29      | 1.40        | 1.09      | 1.40        | 1.60       | 1.30         | 1.59       | 1.65         | 1.79       | 1.42         |
| QSER1     | glutamine and serine rich   | chr11p13             | 0                                       | ---                                 | -1.00         | 1.01            | 1.11      | 1.06        | 1.07      | 1.13        | -1.08      | -1.09        | -1.27      | -1.22        | -1.17      | -1.15        |
| QSOX1     | quiescin Q6 sulfhydryl oxid | chr1q24              | protein folding                         | ---                                 | -1.03         | -1.02           | 1.03      | 1.06        | 1.08      | 1.04        | 1.19       | 1.09         | 1.25       | 1.22         | 1.36       | 1.73         |
| QSOX2     | quiescin Q6 sulfhydryl oxid | chr9q34.3            | cell redox homeostasis                  | ---                                 | 1.06          | 1.14            | -1.13     | 1.08        | -1.10     | -1.24       | 1.32       | 1.46         | 1.32       | 1.20         | 1.41       | 1.23         |
| QSOX2     | quiescin Q6 sulfhydryl oxid | chr9q34.3            | cell redox homeostasis                  | ---                                 | 1.03          | -1.00           | 1.06      | 1.01        | 1.14      | 1.06        | 1.07       | 1.01         | 1.25       | 1.23         | 1.43       | 1.40         |
| R3HCC1    | R3H domain and coiled-coi   | chr8p21.3            | 0                                       | ---                                 | -1.05         | -1.01           | -1.16     | 1.07        | -1.04     | -1.11       | 1.08       | 1.19         | -1.34      | -1.38        | -1.84      | -1.54        |
| R3HCC1    | R3H domain and coiled-coi   | chr8p21.3            | 0                                       | ---                                 | -1.12         | -1.16           | -1.02     | 1.03        | 1.07      | 1.03        | 1.11       | 1.12         | -1.33      | -1.28        | -1.69      | -1.65        |
| R3HCC1L   | R3H domain and coiled-coi   | chr10q24.2           | 0                                       | ---                                 | -1.32         | -1.35           | 1.00      | 1.06        | 1.10      | -1.05       | 1.08       | 1.08         | 1.41       | 1.33         | 1.20       | 1.35         |
| R3HDM1    | R3H domain containing 1     | chr2q21.3            | 0                                       | ---                                 | -1.00         | -1.05           | -1.07     | -1.07       | -1.09     | -1.05       | -1.09      | -1.10        | -1.25      | -1.11        | -1.09      | -1.17        |
| R3HDM2    | R3H domain containing 2     | chr12q13.3           | 0                                       | ---                                 | -1.02         | 1.02            | 1.09      | 1.02        | -1.17     | 1.10        | 1.04       | 1.02         | -1.25      | -1.05        | -1.42      | -1.48        |
| RAB10     | RAB10, member RAS onc       | chr2p23.3            | GTP catabolic process                   | ---                                 | 1.07          | 1.12            | 1.07      | 1.05        | -1.01     | 1.05        | -1.17      | -1.11        | -1.24      | -1.07        | -1.21      | -1.37        |
| RAB10     | RAB10, member RAS onc       | chr2p23.3            | GTP catabolic process                   | ---                                 | -1.09         | -1.06           | -1.06     | -1.08       | -1.03     | 1.03        | 1.00       | 1.09         | 1.20       | 1.22         | 1.26       | 1.26         |
| RAB11A    | RAB11A, member RAS onc      | chr15q22.31          | cytokinesis                             | ---                                 | 1.01          | 1.08            | -1.02     | -1.01       | -1.01     | -1.11       | 1.09       | -1.00        | 1.43       | 1.25         | 1.38       | 1.28         |
| RAB11A    | RAB11A, member RAS onc      | chr15q22.31          | cytokinesis                             | ---                                 | 1.03          | 1.05            | 1.10      | 1.08        | -1.12     | 1.05        | -1.24      | -1.21        | -1.58      | -1.61        | -1.51      | -1.36        |
| RAB11B    | RAB11B, member RAS onc      | chr19p13.2           | receptor recycling                      | ---                                 | 1.01          | -1.06           | -1.01     | -1.05       | 1.14      | -1.09       | -1.10      | -1.24        | 1.35       | 1.28         | 1.15       | 1.30         |
| RAB11B-AS | RAB11B antisense RNA 1      | ---                  | 0                                       | ---                                 | -1.07         | -1.05           | 1.39      | 1.36        | 1.03      | -1.07       | -1.06      | 1.35         | -1.62      | -1.11        | -1.59      | -1.47        |
| RAB11FIP2 | RAB11 family interacting    | chr10q26.11          | transport                               | ---                                 | 1.14          | 1.14            | 1.25      | 1.13        | -1.01     | -1.01       | -1.23      | -1.07        | -1.98      | -1.70        | -1.95      | -2.20        |
| RAB11FIP2 | RAB11 family interacting    | chr10q26.11          | transport                               | ---                                 | 1.20          | 1.08            | 1.08      | -1.11       | -1.04     | 1.07        | -1.23      | -1.14        | -2.10      | -1.64        | -2.33      | -2.25        |
| RAB11FIP3 | RAB11 family interacting    | chr16p13.3           | cytokinesis                             | ---                                 | 1.10          | 1.01            | 1.21      | 1.50        | -1.06     | -1.10       | 1.13       | 1.05         | -1.95      | -1.30        | -1.91      | -2.09        |
| RAB11FIP4 | RAB11 family interacting    | chr17q11.2           | cytokinesis                             | ---                                 | 6.70          | 4.03            | 2.08      | -3.66       | -2.02     | -1.65       | -3.35      | -1.68        | 3.26       | 1.53         | -1.61      | 1.89         |
| RAB11FIP5 | RAB11 family interacting    | chr2p13              | transport                               | ---                                 | -1.14         | -1.21           | -1.08     | 1.00        | -1.07     | -1.04       | 1.04       | -1.04        | 1.33       | 1.41         | 1.30       | 1.41         |
| RAB13     | RAB13, member RAS onc       | chr1q21.2            | GTP catabolic process                   | ---                                 | -1.08         | -1.13           | 1.00      | 1.07        | 1.05      | -1.07       | 1.12       | 1.07         | 1.26       | 1.13         | 1.19       | 1.36         |
| RAB18     | RAB18, member RAS onc       | chr10p12.1           | eye development                         | ---                                 | 1.15          | -1.02           | -1.05     | -1.10       | -1.08     | -1.04       | -1.09      | -1.04        | 1.03       | 1.05         | 1.52       | 1.35         |
| RAB18     | RAB18, member RAS onc       | chr10p12.1           | eye development                         | ---                                 | -1.02         | 1.02            | 1.07      | 1.02        | -1.01     | 1.03        | -1.08      | -1.05        | -1.15      | -1.01        | 1.23       | 1.18         |
| RAB18     | RAB18, member RAS onc       | chr10p12.1           | eye development                         | ---                                 | 1.01          | 1.04            | -1.12     | -1.11       | -1.06     | -1.06       | -1.41      | -1.35        | -1.20      | -1.36        | -1.56      | -1.42        |
| RAB1B     | RAB1B, member RAS onc       | chr11q12             | GTP catabolic process                   | ---                                 | -1.06         | -1.12           | 1.01      | 1.01        | 1.01      | 1.00        | 1.25       | 1.12         | 1.41       | 1.26         | 1.17       | 1.18         |
| RAB20     | RAB20, member RAS onc       | chr13q34             | GTP catabolic process                   | ---                                 | 1.05          | 1.06            | 1.12      | 1.07        | 1.10      | 1.11        | 1.35       | 1.12         | 1.84       | 1.73         | 1.40       | 1.48         |
| RAB21     | RAB21, member RAS onc       | chr12q21.1           | GTP catabolic process                   | ---                                 | 1.14          | 1.10            | 1.04      | -1.01       | -1.02     | -1.00       | -1.01      | -1.07        | -1.07      | -1.05        | -1.12      | -1.27        |
| RAB21     | RAB21, member RAS onc       | chr12q21.1           | GTP catabolic process                   | ---                                 | 1.28          | 1.33            | 1.19      | 1.24        | -1.03     | 1.19        | -1.42      | -1.19        | -1.15      | -1.31        | -1.78      | -1.55        |
| RAB22A    | RAB22A, member RAS onc      | chr20q13.32          | GTP catabolic process                   | ---                                 | -1.06         | 1.03            | 1.11      | 1.02        | -1.03     | -1.11       | -1.22      | -1.05        | -1.09      | 1.01         | -1.54      | -1.40        |
| RAB22A    | RAB22A, member RAS onc      | chr20q13.32          | endocytosis                             | ---                                 | -1.09         | -1.01           | 1.12      | -1.15       | 1.10      | 1.07        | -1.33      | -1.32        | -1.22      | -1.01        | -1.30      | -1.25        |
| RAB23     | RAB23, member RAS onc       | chr6p11              | autophagic vacuole assembly             | ---                                 | 1.08          | 1.27            | 1.20      | -1.10       | -1.34     | 1.15        | -1.22      | 1.14         | -1.14      | -1.08        | 1.60       | -1.02        |
| RAB23     | RAB23, member RAS onc       | chr6p11              | autophagic vacuole assembly             | ---                                 | 1.27          | 1.31            | 1.16      | -1.02       | -1.01     | 1.35        | -1.29      | -1.29        | -1.23      | -1.17        | 1.44       | -1.05        |
| RAB27A    | RAB27A, member RAS onc      | chr15q15-q21.1       | GTP catabolic process                   | ---                                 | -1.04         | -1.08           | -1.04     | -1.07       | 1.03      | -1.04       | -1.12      | -1.02        | 1.14       | 1.55         | -1.08      | 1.07         |
| RAB27A    | RAB27A, member RAS onc      | chr15q15-q21.1       | GTP catabolic process                   | ---                                 | 1.03          | 1.03            | 1.05      | 1.10        | -1.07     | 1.06        | -1.08      | 1.16         | 1.20       | 1.36         | -1.12      | 1.14         |
| RAB27A    | RAB27A, member RAS onc      | chr15q15-q21.1       | GTP catabolic process                   | ---                                 | 1.03          | 1.04            | 1.03      | 1.05        | 1.01      | 1.00        | -1.19      | -1.05        | 1.29       | 1.42         | -1.03      | 1.28         |
| RAB27A    | RAB27A, member RAS onc      | chr15q15-q21.1       | GTP catabolic process                   | ---                                 | -1.05         | -1.15           | -1.03     | 1.26        | 1.16      | -1.03       | 1.11       | 1.16         | 2.34       | 2.17         | 1.97       | 2.39         |
| RAB27A    | RAB27A, member RAS onc      | chr15q15-q21.1       | GTP catabolic process                   | ---                                 | -1.15         | -1.17           | -1.01     | 1.23        | -1.02     | -1.08       | 1.17       | 1.25         | 2.68       | 2.48         | 1.93       | 2.33         |
| RAB27B    | RAB27B, member RAS onc      | chr18q21.2           | GTP catabolic process                   | ---                                 | -1.58         | -1.35           | 1.15      | 1.06        | -1.00     | 1.14        | 1.60       | 1.28         | 1.62       | 1.33         | 2.00       | 2.34         |
| RAB28     | RAB28, member RAS onc       | chr4p15.33           | mitotic cell cycle                      | DNA_replication_Reactome // GenMAPP | -1.05         | 1.04            | -1.14     | -1.12       | -1.09     | -1.05       | -1.03      | -1.04        | -1.40      | -1.46        | -1.34      | -1.43        |
| RAB28     | RAB28, member RAS onc       | chr4p15.33           | GTP catabolic process                   | ---                                 | -1.03         | -1.07           | 1.02      | 1.04        | -1.10     | 1.04        | -1.15      | -1.03        | -1.32      | -1.11        | -1.22      | -1.12        |
| RAB2A     | RAB2A, member RAS onc       | chr8q12.1            | mitotic cell cycle                      | ---                                 | 1.12          | 1.17            | 1.05      | -1.23       | -1.05     | 1.02        | -1.29      | -1.02        | -1.60      | -1.53        | -1.59      | -1.99        |
| RAB2A     | RAB2A, member RAS onc       | chr8q12.1            | mitotic cell cycle                      | ---                                 | -1.04         | 1.04            | 1.07      | -1.07       | 1.04      | 1.04        | -1.06      | -1.01        | 1.47       | 1.43         | 1.71       | 1.79         |
| RAB2A     | RAB2A, member RAS onc       | chr8q12.1            | mitotic cell cycle                      | ---                                 | -1.04         | -1.05           | 1.03      | -1.05       | 1.04      | 1.12        | 1.13       | 1.20         | 1.98       | 1.82         | 2.27       | 2.13         |
| RAB30     | RAB30, member RAS onc       | chr11q12-q14         | GTP catabolic process                   | ---                                 | 1.07          | -1.07           | 1.10      | 1.17        | 1.08      | 1.15        | -1.27      | -1.13        | -1.10      | 1.16         | 1.14       | 1.17         |
| RAB30     | RAB30, member RAS onc       | chr11q12-q14         | GTP catabolic process                   | ---                                 | -1.02         | -1.02           | 1.10      | 1.05        | 1.06      | 1.11        | -1.00      | -1.05        | 1.18       | 1.36         | 1.50       | 1.39         |
| RAB30     | RAB30, member RAS onc       | chr11q12-q14         | GTP catabolic process                   | ---                                 | -1.15         | 1.17            | 1.15      | -1.22       | -1.02     | -1.25       | -1.09      | -1.21        | 1.40       | 1.45         | 1.76       | 2.32         |
| RAB30-AS1 | RAB30 antisense RNA 1 (t    | ---                  | 0                                       | ---                                 | 1.40          | 1.46            | -1.08     | -1.04       | 1.05      | 1.02        | -1.51      | -1.04        | -1.72      | -2.00        | -1.68      | -1.33        |
| RAB30-AS1 | RAB30 antisense RNA 1 (t    | ---                  | 0                                       | ---                                 | 1.05          | 1.03            | -1.09     | 1.01        | 1.06      | 1.07        | 1.06       | 1.12         | -1.43      | -1.53        | -2.02      | -1.82        |
| RAB31     | RAB31, member RAS onc       | chr18p11.3           | GTP catabolic process                   | ---                                 | -1.12         | -1.17           | 1.08      | -1.01       | 1.05      | -1.00       | 1.07       | -1.04        | 1.46       | 1.31         | 1.23       | 1.34         |
| RAB32     | RAB32, member RAS onc       | chr6q24.3            | GTP catabolic process                   | ---                                 | 1.14          | 1.14            | -1.01     | -1.02       | -1.13     | -1.10       | 1.08       | 1.04         | 1.54       | 1.33         | 2.17       | 1.61         |
| RAB32     | RAB32, member RAS onc       | chr6q24.3            | small GTPase mediated signal transducti | ---                                 | 1.20          | 1.16            | -1.02     | -1.12       | 1.04      | 1.04        | 1.06       | 1.15         | 1.18       | 1.05         | 1.73       | 1.31         |
| RAB33A    | RAB33A, member RAS onc      | chrXq26.1            | GTP catabolic process                   | ---                                 | 1.00          | 1.28            | -1.07     | 1.10        | 1.09      | 1.21        | -1.44      | 1.12         | -1.18      | 1.20         | -1.66      | -2.01        |
| RAB33B    | RAB33B, member RAS onc      | chr4q28              | GTP catabolic process                   | ---                                 | -1.00         | -1.22           | 1.01      | 1.03        | 1.08      | 1.08        | 1.00       | -1.18        | -1.20      | -1.05        | 1.23       | 1.28         |
| RAB35     | RAB35, member RAS onc       | chr12q24.31          | cytokinesis                             | ---                                 | 1.01          | -1.13           | 1.19      | -1.13       | -1.03     | 1.05        | 1.08       | 1.04         | 1.33       | 1.13         | 1.16       | -1.12        |

| ID           | Gene Title                  | Chromosomal Location | 1st Gene Ontology Biological Process    | Pathway                                   | A2497 30 mins | A2497P' 30 mins | A2497 2 h | A2497P' 2 h | A2497 4 h | A2497P' 4 h | A2497 24 h | A2497P' 24 h | A2497 48 h | A2497P' 48 h | A2497 72 h | A2497P' 72 h |
|--------------|-----------------------------|----------------------|-----------------------------------------|-------------------------------------------|---------------|-----------------|-----------|-------------|-----------|-------------|------------|--------------|------------|--------------|------------|--------------|
| RAB38        | RAB38, member RAS onc       | chr11q14             | GTP catabolic process                   | ---                                       | 1.02          | -1.03           | -1.01     | -1.20       | 1.01      | 1.06        | 1.01       | -1.01        | -1.63      | -1.53        | -1.58      | -2.02        |
| RAB3C        | RAB3C, member RAS onc       | chr5q13              | GTP catabolic process                   | ---                                       | 9.76          | 13.06           | 6.46      | -2.23       | 5.83      | 3.39        | -3.13      | 2.42         | 2.29       | 2.02         | 4.55       | 3.95         |
| RAB3D        | RAB3D, member RAS onc       | chr19p13.2           | GTP catabolic process                   | ---                                       | 1.21          | -1.03           | 1.34      | 1.33        | 1.12      | 1.20        | -1.03      | -1.12        | 1.38       | 1.47         | 1.56       | 1.46         |
| RAB3GAP1     | RAB3 GTPase activating p    | chr2q21.3            | brain development                       | ---                                       | -1.09         | -1.03           | -1.02     | -1.15       | 1.10      | 1.05        | 1.03       | 1.06         | -1.16      | -1.02        | -1.07      | -1.16        |
| RAB3GAP1     | RAB3 GTPase activating p    | chr2q21.3            | brain development                       | ---                                       | -1.10         | -1.06           | -1.09     | -1.06       | 1.18      | 1.02        | 1.39       | 1.03         | 1.14       | 1.17         | 1.76       | 1.99         |
| RAB3IP       | RAB3A interacting protein   | chr12q15             | Golgi to plasma membrane transport      | ---                                       | 1.13          | 1.12            | 1.05      | 1.09        | -1.17     | -1.06       | 1.29       | 1.00         | 1.19       | 1.57         | 1.67       | 1.49         |
| RAB3IP       | RAB3A interacting protein   | chr12q15             | transport                               | ---                                       | 1.15          | 1.14            | -1.06     | -1.02       | 1.07      | 1.05        | 1.04       | 1.08         | 1.21       | 1.55         | 1.49       | 1.36         |
| RAB40AL      | RAB40A, member RAS onc      | chrXq22.2            | GTP catabolic process                   | ---                                       | 1.02          | -1.97           | -1.37     | -1.04       | 1.29      | 1.29        | -1.28      | 1.18         | -1.33      | -2.11        | -2.77      | -2.68        |
| RAB40B       | RAB40B, member RAS onc      | chr17q25.3           | GTP catabolic process                   | ---                                       | -1.02         | 1.02            | 1.10      | 1.03        | -1.04     | -1.06       | -1.17      | 1.20         | -1.98      | -1.46        | -1.84      | -1.78        |
| RAB40C       | RAB40C, member RAS onc      | chr16p13.3           | small GTPase mediated signal transducti | ---                                       | -1.05         | -1.06           | -1.02     | -1.00       | 1.44      | 1.19        | 1.51       | 1.20         | 1.59       | 2.17         | 1.47       | 1.98         |
| RAB40C       | RAB40C, member RAS onc      | chr16p13.3           | GTP catabolic process                   | ---                                       | 1.21          | -1.06           | -1.06     | 1.02        | -1.05     | 1.06        | 1.27       | 1.14         | 1.36       | 2.11         | 1.51       | 2.01         |
| RAB40C       | RAB40C, member RAS onc      | chr16p13.3           | GTP catabolic process                   | ---                                       | 1.21          | -1.87           | 1.00      | 1.57        | 1.30      | 1.33        | 1.13       | -1.12        | 1.82       | -1.09        | 1.24       | 1.15         |
| RAB4A /// SH | RAB4A, member RAS onc       | chr1q42-q43 /// chr  | GTP catabolic process                   | ---                                       | 1.01          | 1.19            | -1.15     | -1.16       | -1.06     | -1.08       | -1.00      | 1.08         | -1.03      | 1.04         | -1.03      | -1.12        |
| RAB4A /// SH | RAB4A, member RAS onc       | chr1q42-q43 /// chr  | GTP catabolic process                   | ---                                       | -1.04         | -1.02           | -1.05     | -1.04       | -1.15     | -1.08       | -1.42      | -1.23        | -1.60      | -1.31        | -1.63      | -1.56        |
| RAB5A        | RAB5A, member RAS onc       | chr3p24-p22          | GTP catabolic process                   | ---                                       | -1.16         | -1.03           | 1.10      | 1.01        | 1.02      | -1.10       | -1.05      | 1.16         | 1.40       | 1.28         | 1.68       | 1.50         |
| RAB5C        | RAB5C, member RAS onc       | chr17q21.2           | GTP catabolic process                   | ---                                       | -1.01         | -1.02           | -1.00     | -1.13       | 1.12      | 1.01        | 1.03       | -1.01        | 1.16       | 1.20         | 1.05       | 1.18         |
| RAB6A        | RAB6A, member RAS onc       | chr11q13.3           | protein targeting to Golgi              | ---                                       | -1.26         | 1.10            | -1.11     | -1.23       | 1.23      | 1.03        | 1.24       | 1.59         | 1.61       | 1.01         | 2.17       | 1.46         |
| RAB6A        | RAB6A, member RAS onc       | chr11q13.3           | protein targeting to Golgi              | ---                                       | -1.01         | 1.04            | -1.03     | 1.00        | -1.07     | 1.01        | -1.05      | -1.04        | 1.10       | 1.27         | 1.07       | 1.08         |
| RAB6B        | RAB6B, member RAS onc       | chr3q22.1            | GTP catabolic process                   | ---                                       | 1.44          | 1.56            | 1.49      | 1.71        | -1.43     | -1.75       | 1.17       | 1.64         | 2.93       | 3.13         | 1.39       | 2.52         |
| RAB6B        | RAB6B, member RAS onc       | chr3q22.1            | GTP catabolic process                   | ---                                       | -1.93         | -1.66           | 1.27      | 1.03        | -2.26     | 1.01        | 1.24       | 1.26         | 2.52       | 2.63         | 1.15       | 1.96         |
| RAB6B        | RAB6B, member RAS onc       | chr3q22.1            | GTP catabolic process                   | ---                                       | -1.13         | -1.84           | 1.36      | 1.24        | 1.00      | -1.44       | 1.15       | 1.17         | 1.26       | -1.17        | 10.54      | 8.07         |
| RAB7A        | RAB7A, member RAS onc       | chr3q21.3            | GTP catabolic process                   | ---                                       | 1.12          | 1.32            | 1.40      | 1.29        | 1.04      | 1.11        | 1.20       | 1.02         | -3.58      | -2.65        | -2.28      | -1.44        |
| RAB7B        | RAB7B, member RAS onc       | chr1q32              | transport                               | ---                                       | -3.89         | -2.56           | 1.06      | 1.41        | -3.08     | -1.11       | -2.22      | 1.83         | 1.46       | -1.41        | 2.21       | 1.80         |
| RAB7L1       | RAB7, member RAS onc        | chr1q32              | GTP catabolic process                   | ---                                       | 1.04          | 1.04            | 1.06      | 1.02        | 1.00      | -1.03       | -1.02      | -1.03        | 1.07       | 1.12         | 1.40       | 1.21         |
| RAB7L1       | RAB7, member RAS onc        | chr1q32              | GTP catabolic process                   | ---                                       | -1.17         | -1.21           | 1.04      | -1.03       | -1.00     | 1.10        | -1.33      | -1.03        | -1.17      | 1.15         | 1.18       | 1.23         |
| RAB8B        | RAB8B, member RAS onc       | chr15q22.2           | GTP catabolic process                   | ---                                       | 1.03          | 1.08            | 1.31      | 1.03        | 1.45      | -1.10       | 1.55       | 1.32         | 1.21       | 1.02         | 1.81       | 1.22         |
| RAB9A        | RAB9A, member RAS onc       | chrXp22.2            | GTP catabolic process                   | ---                                       | 1.11          | 1.08            | 1.03      | -1.08       | -1.06     | -1.11       | 1.10       | 1.03         | 1.09       | 1.03         | 1.35       | 1.12         |
| RABAC1       | Rab acceptor 1 (prenylated) | chr19q13.2           | 0                                       | ---                                       | -1.08         | -1.08           | 1.05      | -1.07       | 1.13      | 1.03        | 1.15       | -1.01        | 1.23       | 1.08         | 1.25       | 1.31         |
| RABEP1       | rabaptin, RAB GTPase bind   | chr17p13.2           | cytokinesis                             | ---                                       | -1.00         | -1.08           | -1.00     | 1.02        | 1.05      | 1.08        | -1.03      | 1.03         | -1.82      | -1.56        | -1.61      | -1.59        |
| RABEP1       | rabaptin, RAB GTPase bind   | chr17p13.2           | cytokinesis                             | ---                                       | -1.11         | -1.19           | 1.02      | 1.08        | 1.02      | 1.11        | 1.06       | 1.14         | -1.32      | -1.12        | -1.51      | -1.30        |
| RABEP2       | rabaptin, RAB GTPase bind   | chr16p11.2           | cytokinesis                             | ---                                       | 1.01          | 1.04            | -1.11     | -1.10       | -1.15     | -1.12       | -1.02      | 1.44         | -1.01      | -1.39        | -1.30      | -1.36        |
| RABEPK       | Rab9 effector protein with  | chr9q33.3            | receptor-mediated endocytosis           | ---                                       | -1.18         | -1.18           | -1.02     | -1.03       | 1.01      | -1.10       | 1.16       | 1.15         | 1.11       | 1.16         | 1.28       | 1.28         |
| RABGAP1L     | RAB GTPase activating pr    | chr1q124             | regulation of Rab GTPase activity       | ---                                       | 1.09          | 1.09            | -1.25     | -1.02       | 1.10      | 1.24        | 1.03       | 1.11         | -1.13      | -1.45        | -1.66      | -2.12        |
| RABGAP1L     | RAB GTPase activating pr    | chr1q124             | regulation of Rab GTPase activity       | ---                                       | -1.06         | -1.25           | 1.03      | -1.12       | -1.04     | 1.11        | -1.21      | -1.06        | -1.55      | -1.21        | -1.11      | -1.05        |
| RABGGTA      | Rab geranylgeranyltransfer  | chr14q11.2           | cellular protein modification process   | ---                                       | 1.00          | -1.10           | -1.05     | 1.04        | -1.03     | -1.21       | 1.02       | 1.13         | -1.16      | -1.29        | -1.17      | -1.26        |
| RABL2A /// F | RAB, member of RAS onc      | chr22q13.33 /// chr2 | GTP catabolic process                   | ---                                       | 1.19          | 1.14            | -1.03     | -1.05       | -1.08     | 1.10        | -1.23      | -1.17        | -1.60      | -1.66        | -1.67      | -1.96        |
| RABL2A /// F | RAB, member of RAS onc      | chr22q13.33 /// chr2 | GTP catabolic process                   | ---                                       | 1.09          | 1.10            | 1.27      | 1.12        | 1.22      | 1.01        | 1.12       | 1.00         | -1.59      | -1.58        | -3.32      | -2.26        |
| RABL3        | RAB, member of RAS onc      | chr3q13.33           | small GTPase mediated signal transducti | ---                                       | 1.17          | 1.21            | 1.01      | 1.03        | 1.06      | 1.04        | -1.15      | -1.11        | -1.08      | 1.19         | -1.27      | -1.50        |
| RABL3        | RAB, member of RAS onc      | chr3q13.33           | small GTPase mediated signal transducti | ---                                       | 1.09          | -1.00           | 1.16      | 1.11        | 1.02      | -1.14       | 1.20       | 1.12         | 1.00       | 1.07         | -1.37      | -1.38        |
| RABL5        | RAB, member RAS onc         | chr7q22.1            | small GTPase mediated signal transducti | ---                                       | -1.24         | -1.14           | 1.13      | 1.16        | 1.27      | 1.12        | 1.25       | 1.04         | -1.03      | -1.39        | -1.48      | -1.25        |
| RABL6        | RAB, member RAS onc         | chr9q34.3            | small GTPase mediated signal transducti | ---                                       | 1.04          | -1.06           | -1.03     | 1.00        | -1.10     | -1.14       | 1.10       | 1.25         | 1.53       | 1.35         | 1.18       | 1.25         |
| RABL6        | RAB, member RAS onc         | chr9q34.3            | small GTPase mediated signal transducti | ---                                       | -1.02         | -1.07           | -1.00     | 1.01        | -1.04     | -1.03       | -1.08      | -1.02        | -1.03      | -1.12        | -2.21      | -2.29        |
| RABL6        | RAB, member RAS onc         | chr9q34.3            | small GTPase mediated signal transducti | ---                                       | -1.04         | 1.04            | 1.13      | -1.06       | -1.07     | -1.08       | -1.04      | 1.02         | 1.10       | 1.05         | 1.27       | 1.36         |
| RAC1         | ras-related C3 botulinum to | chr7p22              | auditory receptor cell morphogenesis    | G13_Signaling_Pathway // GenMAPP /// G    | 1.06          | 1.07            | -1.12     | -1.17       | -1.11     | -1.13       | -1.20      | -1.18        | 1.16       | 1.18         | 1.23       | 1.16         |
| RAC1         | ras-related C3 botulinum to | chr7p22              | auditory receptor cell morphogenesis    | G13_Signaling_Pathway // GenMAPP /// G    | -1.07         | -1.04           | -1.02     | 1.07        | 1.05      | -1.02       | 1.15       | 1.07         | 1.49       | 1.17         | 1.20       | 1.25         |
| RAC1         | ras-related C3 botulinum to | chr7p22              | auditory receptor cell morphogenesis    | G13_Signaling_Pathway // GenMAPP /// G    | 1.17          | 1.11            | 1.12      | -1.07       | -1.05     | 1.01        | -1.34      | -1.27        | -1.01      | 1.17         | 1.13       | 1.08         |
| RAC2         | ras-related C3 botulinum to | chr22q13.1           | GTP catabolic process                   | Integrin-mediated_cell_adhesion_KEGG // C | 1.07          | -1.16           | -1.14     | 1.56        | 1.37      | 1.08        | -1.14      | -1.15        | 1.10       | 1.28         | 1.52       | 1.59         |
| RAC2         | ras-related C3 botulinum to | chr22q13.1           | GTP catabolic process                   | Integrin-mediated_cell_adhesion_KEGG // C | 1.02          | 1.02            | 1.00      | -1.01       | 1.02      | 1.09        | 1.23       | -1.01        | 1.57       | 1.53         | 1.42       | 1.49         |
| RACGAP1P     | Rac GTPase activating prot  | chr12q12             | signal transduction                     | ---                                       | 1.68          | 1.43            | 2.20      | 1.92        | -2.12     | -1.12       | -2.15      | -1.41        | 1.29       | -1.05        | -1.43      | 2.07         |
| RAD1         | RAD1 homolog (S. pombe)     | chr5p13.2            | cell cycle checkpoint                   | ---                                       | -1.09         | -1.03           | 1.05      | -1.07       | 1.11      | 1.03        | 1.01       | 1.00         | -1.27      | -1.23        | 1.09       | 1.02         |
| RAD1         | RAD1 homolog (S. pombe)     | chr5p13.2            | cell cycle checkpoint                   | ---                                       | 1.05          | 1.17            | 1.07      | 1.04        | -1.08     | -1.00       | -1.10      | -1.02        | 1.15       | 1.04         | 1.00       | 1.04         |
| RAD1         | RAD1 homolog (S. pombe)     | chr5p13.2            | cell cycle checkpoint                   | ---                                       | 1.01          | -1.05           | -1.00     | 1.05        | -1.13     | -1.07       | -1.01      | 1.12         | -1.17      | -1.10        | 1.05       | 1.08         |
| RAD17        | RAD17 homolog (S. pombe)    | chr5q13              | cell cycle checkpoint                   | ---                                       | -1.03         | -1.02           | 1.17      | 1.10        | 1.28      | 1.10        | 1.03       | 1.00         | -1.46      | -1.41        | -1.00      | -1.05        |
| RAD17        | RAD17 homolog (S. pombe)    | chr5q13              | cell cycle checkpoint                   | ---                                       | -1.04         | -1.06           | 1.07      | 1.02        | 1.19      | 1.11        | 1.14       | -1.08        | -1.39      | -1.38        | 1.10       | 1.05         |
| RAD17        | RAD17 homolog (S. pombe)    | chr5q13              | cell cycle checkpoint                   | ---                                       | 1.11          | -1.02           | 1.08      | 1.12        | 1.03      | 1.16        | -1.06      | -1.09        | -1.38      | -1.21        | -1.13      | -1.13        |
| RAD18        | RAD18 homolog (S. cerevi    | chr3p25-p24          | DNA repair                              | ---                                       | 1.01          | -1.08           | 1.17      | 1.14        | -1.03     | -1.01       | 1.00       | -1.08        | -1.59      | -1.25        | 1.05       | 1.06         |
| RAD18        | RAD18 homolog (S. cerevi    | chr3p25-p24          | DNA repair                              | ---                                       | 1.15          | 1.10            | -1.42     | -1.89       | -1.64     | -1.37       | -1.04      | 1.53         | 1.16       | -1.11        | 1.78       | 1.86         |
| RAD18        | RAD18 homolog (S. cerevi    | chr3p25-p24          | DNA repair                              | ---                                       | 1.03          | -1.05           | 1.00      | 1.20        | 1.01      | -1.01       | -1.06      | -1.20        | 1.60       | 1.41         | 1.28       | 1.43         |
| RAD21        | RAD21 homolog (S. pombe)    | chr8q24              | M phase of mitotic cell cycle           | ---                                       | 1.10          | 1.07            | 1.04      | 1.09        | -1.07     | 1.09        | -1.15      | -1.12        | -1.03      | 1.00         | -1.12      | -1.19        |
| RAD21-AS1    | RAD21 antisense RNA 1       | chr8q24.11           | 0                                       | ---                                       | 1.25          | -1.28           | 1.21      | 1.16        | -1.06     | 1.29        | 1.04       | -1.38        | -4.34      | -1.63        | -1.38      | -1.01        |
| RAD23A       | RAD23 homolog A (S. cere    | chr19p13.2           | DNA repair                              | ---                                       | -1.04         | -1.02           | 1.00      | 1.02        | -1.00     | -1.05       | 1.18       | 1.05         | 1.35       | 1.19         | 1.24       | 1.26         |
| RAD50        | RAD50 homolog (S. cerevi    | chr5q31              | regulation of mitotic recombination     | ---                                       | -1.05         | -1.05           | -1.01     | -1.04       | -1.02     | -1.04       | 1.00       | 1.03         | -2.18      | -2.05        | -1.74      | -1.59        |
| RAD50        | RAD50 homolog (S. cerevi    | chr5q31              | regulation of mitotic recombination     | ---                                       | -1.16         | -1.20           | -1.04     | 1.01        | 1.13      | -1.00       | 1.24       | 1.27         | -1.10      | -1.21        | -1.05      | 1.04         |
| RAD51AP1     | RAD51 associated protein    | chr12p13.2-p13.1     | double-strand break repair via homolog  | ---                                       | 1.29          | 1.12            | -1.12     | -1.05       | -1.20     | -1.04       | -1.32      | -1.31        | -1.55      | -1.49        | -1.54      | -1.69        |
| RAD51-AS1    | RAD51 antisense RNA 1       | chr15p15.1           | 0                                       | ---                                       | 1.20          | 1.22            | -1.00     | 1.12        | 1.32      | 1.18        | 1.08       | 1.13         | -2.01      | -1.83        | -1.61      | -1.28        |
| RAD51B       | RAD51 homolog B (S. cere    | chr14q23-q24.2       | DNA metabolic process                   | ---                                       | -1.06         | -1.15           | 1.26      | 2.16        | 3.02      | 3.18        | -1.05      | 1.04         | -2.44      | -2.49        | -1.63      | -1.35        |

| ID       | Gene Title                                                | Chromosomal Location | 1st Gene Ontology Biological Process                                 | Pathway                                   | A2497 30 mins | A2497P' 30 mins | A2497 2 h | A2497P' 2 h | A2497 4 h | A2497P' 4 h | A2497 24 h | A2497P' 24 h | A2497 48 h | A2497P' 48 h | A2497 72 h | A2497P' 72 h |
|----------|-----------------------------------------------------------|----------------------|----------------------------------------------------------------------|-------------------------------------------|---------------|-----------------|-----------|-------------|-----------|-------------|------------|--------------|------------|--------------|------------|--------------|
| RAD51B   | RAD51 homolog B (S. cerevisiae)                           | chr14q23-q24.2       | DNA metabolic process                                                | ---                                       | 1.11          | 1.01            | -1.04     | -1.04       | 1.07      | -1.08       | 1.01       | 1.01         | -2.60      | -1.64        | -1.93      | -2.02        |
| RAD51B   | RAD51 homolog B (S. cerevisiae)                           | chr14q23-q24.2       | DNA metabolic process                                                | ---                                       | -1.31         | -2.25           | -1.79     | -2.31       | -2.68     | 1.90        | 1.67       | 1.14         | -2.22      | -1.91        | -1.17      | -5.87        |
| RAD51C   | RAD51 homolog C (S. cerevisiae)                           | chr17q25.1           | DNA metabolic process                                                | ---                                       | -1.03         | -1.06           | -1.05     | -1.02       | -1.00     | -1.03       | -1.10      | 1.08         | -1.31      | -1.38        | -1.26      | -1.12        |
| RAD51D   | RAD51 homolog D (S. cerevisiae)                           | chr17q11             | DNA metabolic process                                                | ---                                       | -1.08         | -1.07           | 1.06      | 1.14        | 1.01      | 1.32        | 1.07       | 1.14         | -2.03      | -1.66        | -2.49      | -1.82        |
| RAD51D   | RAD51 homolog D (S. cerevisiae)                           | chr17q11             | DNA metabolic process                                                | ---                                       | -1.03         | 1.07            | -1.03     | 1.02        | 1.35      | 1.23        | -1.21      | -1.03        | -1.17      | -1.25        | -1.75      | -1.81        |
| RAD52    | RAD52 homolog (S. cerevisiae)                             | chr12p13-p12.2       | double-strand break repair via homologous recombination              | ---                                       | 1.15          | -2.73           | -1.19     | 1.13        | -1.34     | -1.06       | 1.52       | 1.51         | -1.89      | -1.23        | -1.63      | -1.12        |
| RAD52    | RAD52 homolog (S. cerevisiae)                             | chr12p13-p12.2       | double-strand break repair via homologous recombination              | ---                                       | -1.12         | -1.09           | -1.01     | -1.04       | 1.21      | 1.22        | -1.05      | -1.03        | -1.60      | -1.47        | -1.48      | -1.48        |
| RAD52    | RAD52 homolog (S. cerevisiae)                             | chr12p13-p12.2       | double-strand break repair via homologous recombination              | ---                                       | 1.54          | 1.31            | 1.32      | 1.64        | 1.41      | -1.09       | 1.12       | -1.14        | -1.43      | -1.27        | -1.31      | -1.44        |
| RAD54L   | RAD54-like (S. cerevisiae)                                | chr1p32              | double-strand break repair via homologous recombination              | ---                                       | 1.10          | -1.03           | 1.28      | 1.24        | 1.05      | -1.03       | 1.19       | 1.24         | 1.05       | 1.05         | -1.20      | -1.35        |
| RAD54L2  | RAD54-like 2 (S. cerevisiae)                              | chr3p21.2            | 0                                                                    | ---                                       | -1.10         | -1.10           | 1.09      | -1.04       | 1.16      | 1.04        | -1.05      | 1.08         | -1.02      | -1.13        | 1.13       | 1.06         |
| RAE1     | RAE1 RNA export 1 homolog                                 | chr20q13.31          | mitotic cell cycle                                                   | ---                                       | -1.03         | -1.00           | -1.05     | -1.03       | 1.01      | -1.12       | 1.05       | 1.04         | 1.18       | 1.06         | 1.26       | 1.25         |
| RAF1     | v-raf-1 murine leukemia virus oncogene                    | chr3p25              | MAPK cascade                                                         | MAPK_Cascade // GenMAPP                   | 1.19          | 1.15            | -1.04     | -1.09       | 1.26      | 1.26        | -1.18      | 1.20         | -1.79      | -1.69        | -1.50      | -1.31        |
| RAG1     | recombination activating gene 1                           | chr11p13             | adaptive immune response                                             | ---                                       | 2.51          | 2.69            | -2.24     | 1.31        | -1.27     | -1.39       | 1.29       | 1.10         | -1.25      | -1.07        | 1.15       | 1.30         |
| RAI14    | retinoic acid induced 14                                  | chr5p13.3-p13.2      | vesicle-mediated transport                                           | ---                                       | 1.08          | 1.08            | -1.01     | -1.07       | -1.01     | 1.02        | 1.01       | -1.10        | -1.02      | -1.04        | -1.15      | -1.23        |
| RALA     | v-ral simian leukemia virus oncogene                      | chr7p15-p13          | cytokinesis                                                          | ---                                       | 1.19          | 1.03            | -1.05     | 1.11        | 1.06      | 1.04        | 1.16       | 1.07         | 1.94       | 1.80         | 2.12       | 1.87         |
| RALA     | v-ral simian leukemia virus oncogene                      | chr7p15-p13          | cytokinesis                                                          | ---                                       | -1.04         | -1.01           | -1.06     | 1.01        | -1.03     | 1.00        | -1.03      | -1.08        | -1.08      | -1.03        | -1.03      | -1.07        |
| RALBP1   | ralA binding protein 1                                    | chr18p11.3           | ATP catabolic process                                                | ---                                       | 1.02          | 1.04            | 1.11      | 1.03        | -1.05     | -1.02       | 1.08       | 1.08         | 1.12       | 1.14         | 1.22       | 1.17         |
| RALGAP2A | Ral GTPase activating protein 2A                          | chr20p11.22          | cellular membrane organization                                       | ---                                       | -1.11         | -1.11           | 1.01      | -1.06       | 1.07      | -1.12       | -1.04      | -1.11        | -1.18      | -1.02        | 1.12       | 1.26         |
| RALGAPB  | Ral GTPase activating protein 2B                          | chr20q11.23          | cellular membrane organization                                       | ---                                       | -1.14         | -1.13           | 1.03      | 1.03        | 1.00      | -1.20       | 1.14       | 1.01         | -1.14      | -1.07        | -1.35      | -1.37        |
| RALGAPB  | Ral GTPase activating protein 2B                          | chr20q11.23          | cellular membrane organization                                       | ---                                       | 1.11          | 1.03            | 1.02      | -1.06       | 1.01      | 1.00        | -1.18      | -1.11        | -1.71      | -1.47        | -1.59      | -1.64        |
| RALGDS   | ral guanine nucleotide dissociation stimulator            | chr9q34.3            | signal transduction                                                  | ---                                       | -1.07         | 1.04            | -1.06     | 1.00        | -1.14     | 1.07        | 1.02       | -1.19        | 1.08       | 1.00         | -1.04      | 1.39         |
| RALGPS2  | Ral GEF with PH domain                                    | chr1q25.2            | small GTPase mediated signal transduction                            | ---                                       | 1.29          | -1.02           | 1.02      | 1.11        | -1.05     | -1.06       | 1.10       | -1.16        | -2.15      | -1.78        | 1.46       | -1.32        |
| RALGPS2  | Ral GEF with PH domain                                    | chr1q25.2            | small GTPase mediated signal transduction                            | ---                                       | 1.06          | 2.04            | 1.41      | 1.05        | 1.05      | 1.03        | 1.28       | 1.12         | 1.17       | 1.17         | 1.68       | 1.40         |
| RAN      | RAN, member RAS oncogene family                           | chr12q24.3           | GTP catabolic process                                                | ---                                       | 1.06          | 1.02            | -1.00     | -1.00       | -1.03     | 1.09        | -1.12      | -1.08        | -1.52      | -1.29        | -1.55      | -1.35        |
| RANBP10  | RAN binding protein 10                                    | chr16q22.1           | microtubule cytoskeleton organization                                | ---                                       | 1.01          | -1.04           | -1.01     | -1.00       | -1.07     | -1.08       | -1.04      | 1.09         | -1.66      | -1.58        | -1.64      | -1.52        |
| RANBP10  | RAN binding protein 10                                    | chr16q22.1           | microtubule cytoskeleton organization                                | ---                                       | 1.03          | -1.01           | -1.05     | -1.09       | -1.04     | 1.05        | 1.07       | -1.75        | -1.48      | -1.52        | -1.36      | ---          |
| RANBP17  | RAN binding protein 17                                    | chr5q34              | protein import into nucleus                                          | ---                                       | -1.20         | 1.01            | 1.34      | 1.54        | -1.57     | -1.24       | 1.16       | 1.16         | -2.15      | -1.45        | -2.66      | -2.91        |
| RANBP2   | RAN binding protein 2                                     | chr2q12.3            | M phase of mitotic cell cycle                                        | ---                                       | -1.01         | 1.04            | -1.04     | -1.09       | 1.07      | 1.05        | -1.25      | -1.27        | -2.64      | -2.53        | -2.07      | -1.77        |
| RANBP2   | RAN binding protein 2                                     | chr2q12.3            | M phase of mitotic cell cycle                                        | ---                                       | -1.09         | -1.01           | 1.14      | 1.04        | 1.03      | 1.03        | -1.11      | -1.05        | -1.25      | -1.14        | -1.08      | -1.13        |
| RANBP2   | RAN binding protein 2                                     | chr2q12.3            | M phase of mitotic cell cycle                                        | ---                                       | 1.08          | 1.14            | 1.12      | 1.19        | -1.08     | 1.06        | -1.30      | -1.02        | -2.97      | -2.21        | -2.03      | -2.14        |
| RANBP3   | RAN binding protein 3                                     | chr19p13.3           | transport                                                            | ---                                       | 1.20          | 1.20            | 1.09      | 1.17        | 1.03      | -1.18       | 1.27       | 1.03         | 1.50       | 1.14         | 1.38       | 1.38         |
| RANBP3   | RAN binding protein 3                                     | chr19p13.3           | transport                                                            | ---                                       | -1.05         | -1.08           | 1.05      | -1.04       | 1.10      | -1.01       | 1.11       | 1.02         | -1.30      | -1.37        | -1.41      | -1.27        |
| RANBP6   | RAN binding protein 6                                     | chr9p24.1            | transport                                                            | ---                                       | 1.00          | -1.05           | -1.04     | 1.06        | -1.03     | 1.06        | -1.16      | 1.01         | -1.21      | -1.07        | -1.13      | -1.13        |
| RANBP9   | RAN binding protein 9                                     | chr6p23              | protein complex assembly                                             | ---                                       | -1.09         | 1.06            | 1.35      | 1.06        | 1.15      | 1.58        | 1.07       | -1.09        | -2.38      | -2.27        | -1.11      | -3.30        |
| RANBP9   | RAN binding protein 9                                     | chr6p23              | protein complex assembly                                             | ---                                       | -1.02         | 1.05            | 1.10      | 1.06        | 1.25      | -1.04       | -1.00      | -1.39        | -1.38      | -1.30        | 1.00       | -1.52        |
| RANBP9   | RAN binding protein 9                                     | chr6p23              | protein complex assembly                                             | ---                                       | 1.04          | -1.01           | -1.05     | 1.05        | -1.05     | 1.10        | -1.12      | -1.01        | -1.45      | -1.19        | -1.47      | -1.41        |
| RANGAP1  | Ran GTPase activating protein 1                           | chr22q13             | M phase of mitotic cell cycle                                        | ---                                       | -1.06         | 1.05            | -1.04     | -1.11       | 1.10      | 1.11        | -1.01      | 1.03         | 1.30       | 1.14         | 1.02       | 1.26         |
| RANGAP1  | Ran GTPase activating protein 1                           | chr22q13             | M phase of mitotic cell cycle                                        | ---                                       | 1.07          | -1.08           | -1.01     | -1.09       | 1.09      | 1.06        | -1.02      | 1.11         | 1.02       | 1.00         | 1.41       | 1.43         |
| RANGAP1  | Ran GTPase activating protein 1                           | chr22q13             | M phase of mitotic cell cycle                                        | ---                                       | -1.14         | -1.19           | 1.00      | 1.03        | 1.12      | 1.09        | -1.04      | -1.11        | 1.13       | 1.02         | 1.15       | 1.21         |
| RAP1A    | RAP1A, member of RAS oncogene family                      | chr1p13.3            | activation of MAPKK activity                                         | ---                                       | 1.01          | -1.03           | -1.01     | -1.16       | 1.03      | 1.04        | -1.38      | -1.22        | -1.08      | -1.01        | -1.33      | -1.17        |
| RAP1GAP2 | RAP1 GTPase activating protein 2                          | chr17p13.3           | positive regulation of GTPase activity                               | ---                                       | 1.01          | -1.02           | 1.11      | 1.25        | 1.04      | 1.02        | 1.07       | 1.04         | -1.09      | -1.02        | 1.08       | 1.23         |
| RAP1GDS1 | RAP1, GTP-GDP dissociation stimulator                     | chr4q23-q25          | positive regulation of GTPase activity                               | ---                                       | 1.15          | 1.07            | -1.05     | -1.08       | -1.01     | 1.03        | -1.15      | -1.11        | -1.40      | -1.23        | -1.29      | -1.47        |
| RAP1GDS1 | RAP1, GTP-GDP dissociation stimulator                     | chr4q23-q25          | positive regulation of GTPase activity                               | ---                                       | 1.44          | -1.35           | 1.45      | 1.47        | 1.17      | 1.07        | 1.22       | 1.29         | 2.40       | 2.67         | 2.75       | 3.05         |
| RAP2A    | RAP2A, member of RAS oncogene family                      | chr13q34             | GTP catabolic process                                                | ---                                       | 1.06          | 1.14            | -1.06     | -1.13       | -1.13     | -1.03       | -1.09      | -1.10        | -1.22      | -1.12        | -1.22      | -1.37        |
| RAP2A    | RAP2A, member of RAS oncogene family                      | chr13q34             | GTP catabolic process                                                | ---                                       | -1.31         | 1.05            | -1.22     | -1.15       | -1.08     | -1.32       | 1.11       | -1.19        | -1.62      | -1.05        | -1.68      | -1.50        |
| RAP2A    | RAP2A, member of RAS oncogene family                      | chr13q34             | GTP catabolic process                                                | ---                                       | -1.18         | 1.01            | -1.13     | -1.01       | -1.14     | -1.08       | -1.00      | -1.21        | -1.27      | -1.20        | -1.88      | -2.07        |
| RAPGEF1  | Rap guanine nucleotide exchange factor 1                  | chr9q34.3            | activation of MAPKK activity                                         | Integrin-mediated_cell_adhesion_KEGG // C | -1.16         | -1.20           | 1.03      | 1.04        | 1.03      | 1.01        | -1.06      | -1.01        | -1.25      | -1.08        | -1.43      | -1.23        |
| RAPGEF1  | Rap guanine nucleotide exchange factor 1                  | chr9q34.3            | activation of MAPKK activity                                         | Integrin-mediated_cell_adhesion_KEGG // C | -1.17         | -1.09           | 1.09      | 1.00        | 1.06      | 1.03        | -1.15      | -1.11        | -1.58      | -1.17        | -1.22      | -1.19        |
| RAPGEF2  | Rap guanine nucleotide exchange factor 2                  | chr4q32.1            | MAPK cascade                                                         | ---                                       | 1.13          | 1.07            | -1.04     | -1.12       | -1.11     | 1.03        | -1.31      | -1.08        | -1.54      | -1.38        | -1.25      | -1.39        |
| RAPGEF5  | Rap guanine nucleotide exchange factor 5                  | chr7p15.3            | small GTPase mediated signal transduction                            | ---                                       | 1.98          | 5.89            | -1.80     | -6.02       | 7.71      | 2.59        | 2.71       | -1.68        | 13.07      | 22.61        | 6.09       | 5.94         |
| RAPGEFL1 | Rap guanine nucleotide exchange factor like 1             | chr17q21.1           | signal transduction                                                  | ---                                       | -1.07         | -1.01           | -1.00     | 1.20        | 1.03      | 1.01        | -1.05      | 1.13         | 1.17       | -1.10        | -1.28      | -1.11        |
| RAPH1    | Ras association (RalGDS/Arp23) domain containing 1        | chr2q33              | cell-matrix adhesion                                                 | ---                                       | 1.05          | 1.16            | -1.04     | -1.21       | -1.07     | -1.01       | -1.15      | -1.01        | 1.24       | 1.21         | 1.59       | 1.22         |
| RAPH1    | Ras association (RalGDS/Arp23) domain containing 1        | chr2q33              | cell-matrix adhesion                                                 | ---                                       | 1.24          | 1.27            | 1.03      | -1.19       | -1.06     | 1.07        | -1.03      | -1.08        | 1.24       | 1.21         | 1.83       | 1.20         |
| RAPH1    | Ras association (RalGDS/Arp23) domain containing 1        | chr2q33              | cell-matrix adhesion                                                 | ---                                       | 1.01          | 1.12            | 1.21      | 1.09        | 1.04      | 1.17        | 1.00       | 1.11         | 1.21       | 1.40         | 1.61       | 1.49         |
| RARA     | retinoic acid receptor, alpha                             | chr17q21             | negative regulation of transcription from RNA polymerase II promoter | ---                                       | 1.43          | 1.29            | 1.03      | -1.05       | -1.10     | -1.07       | 1.28       | 1.30         | -1.43      | -1.05        | 1.27       | 1.66         |
| RARA     | retinoic acid receptor, alpha                             | chr17q21             | negative regulation of transcription from RNA polymerase II promoter | ---                                       | 1.23          | 1.34            | -1.01     | -1.38       | -1.10     | 1.01        | 1.22       | 1.11         | 1.65       | 1.51         | 1.55       | 1.86         |
| RARB     | retinoic acid receptor, beta                              | chr3p24.2            | negative regulation of transcription from RNA polymerase II promoter | Nuclear_Receptors // GenMAPP              | -1.69         | 1.20            | 1.10      | 1.36        | 1.06      | -1.20       | 1.31       | -1.77        | -1.94      | -3.39        | -1.99      | -1.95        |
| RARG     | retinoic acid receptor, gamma                             | chr12q13.3           | negative regulation of transcription from RNA polymerase II promoter | Nuclear_Receptors // GenMAPP              | 1.12          | -1.29           | 1.38      | 1.29        | 1.07      | -1.18       | 1.02       | 1.15         | 1.29       | 1.08         | 1.39       | 1.24         |
| RARRES1  | retinoic acid receptor response element binding protein 1 | chr3q25.32           | negative regulation of cell proliferation                            | ---                                       | 1.02          | -1.01           | 1.04      | -1.07       | -1.10     | 1.03        | -1.10      | 1.01         | 1.08       | 1.05         | -1.12      | -1.96        |
| RARRES1  | retinoic acid receptor response element binding protein 1 | chr3q25.32           | negative regulation of cell proliferation                            | ---                                       | 1.19          | 1.05            | -1.03     | -1.06       | -1.33     | -1.18       | 1.07       | 1.06         | 1.63       | 1.16         | 2.04       | 1.42         |
| RARRES1  | retinoic acid receptor response element binding protein 1 | chr3q25.32           | negative regulation of cell proliferation                            | ---                                       | 1.16          | 1.07            | 1.02      | 1.06        | -1.10     | 1.01        | 1.23       | 1.21         | 1.66       | 1.25         | 1.86       | 1.52         |
| RARRES3  | retinoic acid receptor response element binding protein 3 | chr11q23             | lipid metabolic process                                              | ---                                       | 1.03          | 1.08            | -1.05     | 1.09        | -1.40     | -1.23       | 4.83       | 3.35         | 4.42       | 3.36         | 1.75       | 1.47         |
| RARS     | arginyl-tRNA synthetase                                   | chr5q35.1            | translation                                                          | ---                                       | 1.24          | 1.03            | 1.46      | 1.19        | -1.31     | 1.36        | -1.09      | 1.04         | 1.21       | 1.49         | 1.46       | 1.41         |
| RARS2    | arginyl-tRNA synthetase 2                                 | chr6q16.1            | translation                                                          | ---                                       | 1.45          | -1.03           | -1.01     | 1.14        | 1.06      | 1.34        | 1.78       | 1.23         | 1.06       | 1.05         | 1.43       | -1.08        |
| RASA2    | RAS p21 protein activator                                 | chr3q22-q23          | signal transduction                                                  | ---                                       | 1.23          | 1.51            | 1.09      | -1.08       | -1.03     | 1.08        | 1.13       | -1.01        | 1.22       | 1.18         | 2.35       | 1.36         |
| RASA2    | RAS p21 protein activator                                 | chr3q22-q23          | signal transduction                                                  | ---                                       | -1.22         | -1.05           | 1.16      | -1.23       | -1.11     | -1.04       | 1.08       | 1.14         | 1.15       | 1.07         | 1.84       | 1.37         |

| ID         | Gene Title                  | Chromosomal Location | 1st Gene Ontology Biological Process       | Pathway                               | A2497 30 mins | A2497P' 30 mins | A2497 2 h | A2497P' 2 h | A2497 4 h | A2497P' 4 h | A2497 24 h | A2497P' 24 h | A2497 48 h | A2497P' 48 h | A2497 72 h | A2497P' 72 h |
|------------|-----------------------------|----------------------|--------------------------------------------|---------------------------------------|---------------|-----------------|-----------|-------------|-----------|-------------|------------|--------------|------------|--------------|------------|--------------|
| RASA3      | RAS p21 protein activator   | chr13q34             | signal transduction                        | MAPK_Cascade // GenMAPP               | -1.06         | -1.03           | 1.04      | -1.11       | -1.03     | -1.07       | 1.08       | 1.03         | -1.02      | -1.02        | 1.49       | 1.41         |
| RASAL1     | RAS protein activator like  | chr12q23-q24         | signal transduction                        | ---                                   | -1.35         | -1.02           | -1.41     | -1.43       | -1.62     | -2.37       | 1.75       | -1.09        | 2.00       | 1.42         | -1.21      | -1.19        |
| RASAL2     | RAS protein activator like  | chr1q24              | signal transduction                        | ---                                   | -1.54         | -2.44           | 1.53      | 1.21        | 1.77      | 3.27        | -4.23      | -1.62        | -5.17      | -3.29        | 7.07       | 7.22         |
| RASAL2     | RAS protein activator like  | chr1q24              | signal transduction                        | ---                                   | 1.10          | 1.00            | 1.01      | 1.02        | -1.11     | -1.01       | 1.01       | -1.42        | -1.42      | -1.48        | -1.12      | -1.23        |
| RASAL2     | RAS protein activator like  | chr1q24              | signal transduction                        | ---                                   | 1.94          | 1.11            | -1.03     | -1.23       | 1.09      | -1.08       | -1.05      | 1.14         | -2.36      | -2.67        | -1.59      | -1.69        |
| RASD1      | RAS, dexamethasone-induc    | chr17p11.2           | GTP catalytic process                      | ---                                   | -1.04         | -1.05           | -1.14     | 1.17        | 2.16      | 1.02        | -1.37      | -1.09        | 2.70       | 1.98         | 4.06       | 2.90         |
| RASD2      | RASD family, member 2       | chr22q13.1           | synaptic transmission, dopaminergic        | ---                                   | 1.14          | 1.24            | -1.24     | 1.89        | -1.09     | -1.09       | -1.35      | 1.11         | 2.27       | 3.26         | 2.33       | 3.46         |
| RASEF      | RAS and EF-hand domain      | chr9q21.32           | GTP catalytic process                      | ---                                   | 1.11          | 1.19            | 1.06      | 1.18        | 1.09      | 1.07        | -1.24      | 1.03         | -2.28      | -1.45        | -1.34      | -1.81        |
| RASEF      | RAS and EF-hand domain      | chr9q21.32           | small GTPase mediated signal transducti    | ---                                   | 1.02          | -1.00           | 1.14      | 1.03        | 1.07      | 1.04        | 1.05       | 1.01         | -1.96      | -1.89        | -2.18      | -2.14        |
| RASEF      | RAS and EF-hand domain      | chr9q21.32           | small GTPase mediated signal transducti    | ---                                   | 1.06          | -1.11           | 1.10      | 1.03        | 1.14      | 1.10        | 1.03       | -1.05        | -2.34      | -2.10        | -2.60      | -2.50        |
| RASGEF1A   | RasGEF domain family, me    | chr10q11.21          | small GTPase mediated signal transducti    | ---                                   | -3.55         | -2.00           | 2.07      | -4.01       | 1.07      | 1.41        | 2.55       | 2.64         | 2.17       | 1.34         | 2.42       | 3.07         |
| RASGRF1    | Ras protein-specific guanin | chr15q24.2           | apoptotic process                          | ---                                   | -1.02         | 1.31            | -1.08     | 1.41        | -2.08     | -2.29       | -1.26      | -1.50        | 2.20       | 1.20         | -1.31      | 1.65         |
| RASGRF2    | Ras protein-specific guanin | chr5q13              | apoptotic process                          | ---                                   | -3.02         | 1.05            | -1.20     | -2.08       | -1.55     | 1.07        | 1.40       | 1.30         | 2.80       | 1.75         | 2.15       | 1.89         |
| RASL10B    | RAS-like, family 10, mem    | chr17q12             | regulation of systemic arterial blood pres | ---                                   | -1.12         | -1.02           | -1.03     | 1.35        | 1.14      | 1.25        | -1.24      | 1.02         | -1.21      | -1.18        | -1.34      | -1.25        |
| RASSF1     | Ras association (RalGDS/A   | chr3p21.3            | response to DNA damage stimulus            | ---                                   | 1.03          | 1.14            | -1.17     | -1.17       | 1.03      | -1.13       | -1.13      | 1.13         | 1.04       | 1.26         | 1.42       | 1.44         |
| RASSF3     | Ras association (RalGDS/A   | chr12q14.2           | signal transduction                        | ---                                   | -1.13         | -1.12           | -1.10     | 1.14        | -1.16     | 1.03        | -1.04      | 1.32         | 1.24       | 1.25         | -1.25      | -1.08        |
| RASSF4     | Ras association (RalGDS/A   | chr10q11.21          | cell cycle                                 | ---                                   | -1.45         | -1.35           | -1.23     | 1.60        | 1.05      | -1.14       | -1.18      | -2.09        | 3.02       | 4.58         | 1.41       | 1.79         |
| RASSF9     | Ras association (RalGDS/A   | chr12q21.31          | protein targeting                          | ---                                   | -1.46         | -1.25           | 1.15      | 1.58        | 1.69      | -1.35       | 2.64       | 2.12         | -1.24      | -1.15        | -1.35      | -2.41        |
| RAVER2     | ribonucleoprotein, PTB-bin  | chr1p31.3            | 0                                          | ---                                   | 1.04          | 1.01            | -1.04     | -1.05       | -1.00     | 1.01        | -1.16      | -1.22        | -1.62      | -1.36        | -1.53      | -1.45        |
| RB1CC1     | RB1-inducible coiled-coil   | chr8q11              | autophagic vacuole assembly                | ---                                   | 1.13          | 1.04            | -1.06     | -1.02       | -1.08     | 1.08        | -1.27      | -1.07        | -1.40      | -1.31        | -1.29      | -1.55        |
| RB1CC1     | RB1-inducible coiled-coil   | chr8q11              | autophagic vacuole assembly                | ---                                   | 1.04          | 1.04            | 1.02      | -1.04       | -1.09     | 1.02        | -1.09      | -1.13        | -1.39      | -1.23        | -1.05      | -1.12        |
| RBAK // RB | RB-associated KRAB zinc     | chr7p22.1            | transcription, DNA-dependent               | ---                                   | 1.07          | 1.05            | 1.12      | 1.06        | 1.14      | 1.16        | 1.11       | 1.04         | 1.14       | 1.17         | 1.52       | 1.54         |
| RBAK // RB | RB-associated KRAB zinc     | chr7p22.1            | transcription, DNA-dependent               | ---                                   | -1.01         | -1.04           | -1.01     | -1.28       | -1.06     | 1.01        | -1.30      | -1.29        | 1.04       | 1.29         | 1.75       | 1.42         |
| RBAK // RB | RB-associated KRAB zinc     | chr7p22.1            | transcription, DNA-dependent               | ---                                   | 1.02          | 1.06            | 1.20      | 1.13        | 1.04      | 1.12        | 1.03       | 1.04         | -1.39      | 1.02         | 1.22       | 1.32         |
| RBBP4      | retinoblastoma binding prot | chr1p35.1            | mitotic cell cycle                         | ---                                   | 1.13          | -1.00           | 1.20      | 1.25        | 1.01      | 1.26        | 1.26       | 1.13         | -2.00      | -1.73        | -1.79      | -1.47        |
| RBBP4      | retinoblastoma binding prot | chr1p35.1            | mitotic cell cycle                         | ---                                   | 1.42          | 1.32            | 1.03      | 1.08        | -1.07     | 1.20        | -1.32      | -1.17        | -1.56      | 1.45         | -1.37      | -1.83        |
| RBBP4      | retinoblastoma binding prot | chr1p35.1            | mitotic cell cycle                         | ---                                   | -1.13         | -1.06           | 1.04      | 1.06        | 1.11      | 1.07        | -1.14      | -1.10        | 1.33       | 1.40         | 1.14       | 1.27         |
| RBBP4      | retinoblastoma binding prot | chr1p35.1            | mitotic cell cycle                         | ---                                   | -1.03         | -1.05           | 1.02      | -1.04       | -1.03     | 1.05        | 1.07       | 1.05         | 1.21       | 1.11         | 1.48       | 1.39         |
| RBBP4      | retinoblastoma binding prot | chr1p35.1            | mitotic cell cycle                         | ---                                   | 1.07          | 1.01            | 1.06      | -1.14       | 1.14      | 1.38        | -1.32      | -1.19        | 1.26       | 1.63         | 1.22       | -1.01        |
| RBBP6      | retinoblastoma binding prot | chr16p12.2           | protein ubiquitination                     | ---                                   | 1.02          | -1.13           | 1.09      | 1.05        | -1.04     | -1.02       | -1.10      | 1.09         | -1.06      | -1.12        | -1.22      | -1.43        |
| RBBP6      | retinoblastoma binding prot | chr16p12.2           | protein ubiquitination                     | ---                                   | -1.17         | -1.10           | 1.17      | 1.09        | -1.04     | -1.08       | -1.22      | 1.09         | 1.58       | 1.36         | 1.43       | 1.57         |
| RBBP6      | retinoblastoma binding prot | chr16p12.2           | protein ubiquitination                     | ---                                   | 1.11          | 1.09            | -1.01     | -1.19       | -1.03     | 1.19        | -1.39      | -1.28        | -1.93      | -2.11        | -1.13      | -1.38        |
| RBBP6      | retinoblastoma binding prot | chr16p12.2           | protein ubiquitination                     | ---                                   | 1.16          | 1.10            | 1.04      | -1.02       | -1.09     | -1.04       | -1.23      | -1.06        | 1.26       | 1.14         | 1.48       | 1.47         |
| RBBP6      | retinoblastoma binding prot | chr16p12.2           | protein ubiquitination                     | ---                                   | 1.12          | 1.04            | 1.02      | -1.02       | -1.28     | -1.12       | -1.50      | 1.15         | -1.02      | -1.03        | 1.25       | 1.17         |
| RBBP9      | retinoblastoma binding prot | chr20p11.2           | regulation of cell proliferation           | ---                                   | 1.21          | 1.06            | 1.03      | -1.03       | 1.00      | 1.08        | -1.29      | -1.11        | -1.66      | -1.42        | -2.09      | -2.12        |
| RBCK1      | RanBP-type and C3HC4-ty     | chr20p13             | protein polyubiquitination                 | ---                                   | -1.06         | -1.03           | 1.00      | 1.01        | 1.06      | -1.02       | 1.24       | 1.07         | 1.48       | 1.32         | 1.47       | 1.47         |
| RBFA       | ribosome binding factor A   | chr18q23             | rRNA processing                            | ---                                   | 1.32          | 1.17            | -1.25     | 1.36        | 1.23      | 1.10        | -1.23      | -2.07        | 2.72       | 2.04         | 2.93       | 2.15         |
| RBFOX1     | RNA binding protein, fox-   | chr16p13.3           | mRNA processing                            | ---                                   | 1.01          | 1.20            | -5.91     | -2.92       | 1.55      | 1.03        | -1.23      | 1.97         | 3.63       | 3.84         | 1.25       | 1.66         |
| RBFOX3     | RNA binding protein, fox-   | chr17q25.3           | regulation of alternative mRNA splicing    | ---                                   | -2.74         | -1.14           | 2.33      | 3.35        | 2.06      | 1.51        | 3.40       | 1.43         | 1.16       | 1.41         | 1.21       | 1.46         |
| RBK5       | ribokinase                  | chr2p23.3            | carbohydrate metabolic process             | ---                                   | -1.04         | -1.01           | -1.06     | -1.15       | -1.03     | 1.00        | 1.05       | 1.06         | 1.05       | 1.18         | -1.62      | -1.32        |
| RBK5       | ribokinase                  | chr2p23.3            | carbohydrate metabolic process             | ---                                   | -1.08         | -1.09           | -1.12     | -1.17       | 1.16      | 1.06        | -1.01      | 1.00         | -1.09      | 1.14         | -1.90      | -1.69        |
| RBL1       | retinoblastoma-like 1 (p10  | chr20q11.2           | G1 phase of mitotic cell cycle             | Cell_cycle_KEGG // GenMAPP // G1_to_S | 1.06          | 1.00            | 1.10      | 1.26        | 1.12      | 1.13        | 1.06       | 1.06         | -1.86      | -1.60        | -2.10      | -1.79        |
| RBM12      | RNA binding motif protein   | chr20q11.21          | 0                                          | ---                                   | 1.04          | 1.01            | -1.00     | 1.01        | -1.07     | 1.02        | -1.38      | -1.16        | -1.13      | -1.15        | 1.19       | 1.16         |
| RBM12      | RNA binding motif protein   | chr20q11.21          | 0                                          | ---                                   | 1.08          | 1.07            | 1.05      | 1.04        | 1.12      | 1.06        | -1.70      | -1.30        | -1.15      | -1.13        | 1.06       | 1.17         |
| RBM12B     | RNA binding motif protein   | chr8q22.1            | 0                                          | ---                                   | 1.03          | -1.05           | -1.06     | -1.11       | -1.23     | 1.15        | -1.76      | 1.03         | -2.64      | -2.08        | -1.93      | -1.50        |
| RBM12B     | RNA binding motif protein   | chr8q22.1            | 0                                          | ---                                   | -1.04         | -1.07           | -1.01     | -1.08       | 1.00      | 1.14        | -1.25      | -1.03        | -1.89      | -1.62        | -1.40      | -1.60        |
| RBM14-RBM  | RBM14-RBM4 readthrough      | chr11q // chr11q13   | regulation of alternative mRNA splicing    | ---                                   | -1.07         | -1.05           | -1.02     | 1.04        | -1.05     | -1.02       | -1.18      | -1.09        | -1.07      | -1.18        | -1.14      | -1.04        |
| RBM15      | RNA binding motif protein   | chr1p13              | patterning of blood vessels                | ---                                   | 1.19          | 1.56            | 1.48      | 1.12        | -1.16     | 1.13        | -1.50      | -1.83        | 1.10       | -1.01        | 3.09       | 1.77         |
| RBM15      | RNA binding motif protein   | chr1p13              | negative regulation of transcription from  | ---                                   | -1.14         | -1.00           | 1.02      | -1.01       | -1.07     | -1.13       | -1.03      | -1.05        | 1.35       | 1.26         | 1.53       | 1.60         |
| RBM15      | RNA binding motif protein   | chr1p13              | negative regulation of transcription from  | ---                                   | -1.09         | -1.02           | -1.06     | -1.09       | -1.17     | -1.05       | -1.00      | -1.05        | 1.21       | 1.31         | 1.48       | 1.62         |
| RBM15      | RNA binding motif protein   | chr1p13              | negative regulation of transcription from  | ---                                   | 1.06          | 1.01            | 1.01      | -1.05       | 1.03      | 1.12        | -1.25      | -1.21        | 1.39       | 1.32         | 2.19       | 2.00         |
| RBM15      | RNA binding motif protein   | chr1p13              | patterning of blood vessels                | ---                                   | 1.18          | 1.24            | 1.08      | -1.01       | -1.15     | 1.05        | -1.14      | -1.21        | 1.24       | -1.05        | 1.01       | -1.09        |
| RBM15B     | RNA binding motif protein   | chr3p21.2            | regulation of alternative mRNA splicing    | ---                                   | -1.05         | -1.12           | 1.03      | -1.09       | -1.00     | -1.05       | -1.17      | -1.09        | -1.79      | -1.54        | -1.92      | -1.71        |
| RBM17      | RNA binding motif protein   | chr10p15.1           | mRNA processing                            | mRNA_processing_Reactome // GenMAPP   | -1.12         | -1.19           | -1.00     | 1.22        | 1.11      | -1.02       | 1.15       | 1.24         | 1.40       | 1.06         | -1.08      | 1.10         |
| RBM17      | RNA binding motif protein   | chr10p15.1           | mRNA processing                            | mRNA_processing_Reactome // GenMAPP   | -1.00         | -1.70           | 1.12      | 1.40        | -1.02     | 1.04        | -1.76      | 1.15         | 1.25       | -1.26        | -1.04      | 1.24         |
| RBM18      | RNA binding motif protein   | chr9q33.2            | 0                                          | ---                                   | 1.08          | -1.11           | 1.30      | 1.20        | 1.39      | 1.16        | -1.04      | -1.25        | -1.33      | -1.02        | 1.42       | 1.32         |
| RBM22      | RNA binding motif protein   | chr5q33.1            | protein import into nucleus, translocation | ---                                   | 1.09          | -1.06           | 1.20      | 1.20        | 1.09      | 1.01        | 1.03       | -1.09        | 1.22       | 1.21         | 1.38       | 1.36         |
| RBM22      | RNA binding motif protein   | chr5q33.1            | protein import into nucleus, translocation | ---                                   | -1.06         | -1.01           | 1.01      | 1.06        | 1.02      | -1.08       | 1.09       | 1.20         | 1.30       | 1.19         | 1.18       | 1.21         |
| RBM22      | RNA binding motif protein   | chr5q33.1            | protein import into nucleus, translocation | ---                                   | -1.08         | -1.13           | -1.02     | 1.02        | -1.04     | -1.01       | -1.12      | -1.16        | 1.28       | 1.33         | 1.12       | 1.13         |
| RBM23      | RNA binding motif protein   | chr14q11.2           | mRNA processing                            | ---                                   | -1.07         | -1.10           | 1.04      | 1.07        | 1.02      | 1.01        | 1.01       | 1.03         | -1.17      | -1.31        | -1.18      | -1.18        |
| RBM25      | RNA binding motif protein   | chr14q24.3           | regulation of alternative mRNA splicing    | ---                                   | 1.11          | 1.14            | 1.12      | -1.01       | 1.06      | 1.08        | -1.27      | -1.22        | -1.64      | -1.41        | -1.25      | -1.52        |
| RBM25      | RNA binding motif protein   | chr14q24.3           | regulation of alternative mRNA splicing    | ---                                   | 1.03          | 1.04            | -1.01     | -1.02       | -1.02     | 1.03        | -1.23      | -1.11        | -1.29      | -1.15        | -1.40      | -1.46        |
| RBM26      | RNA binding motif protein   | chr13q31.1           | mRNA processing                            | ---                                   | 1.03          | 1.00            | -1.03     | 1.30        | -1.03     | 1.08        | 1.13       | 1.11         | 1.39       | 1.26         | 1.98       | 1.73         |
| RBM26-AS1  | RBM26 antisense RNA 1       | ---                  | 0                                          | ---                                   | 1.07          | 1.22            | -1.06     | -1.02       | -1.10     | -1.08       | -1.29      | -1.12        | -2.01      | -1.93        | -1.88      | -1.96        |
| RBM3       | RNA binding motif (RNP1     | chrXp11.2            | RNA processing                             | ---                                   | 1.01          | 1.10            | -1.06     | -1.10       | -1.14     | -1.00       | -1.11      | -1.08        | -1.36      | -1.16        | -3.06      | -3.74        |
| RBM3       | RNA binding motif (RNP1     | chrXp11.2            | RNA processing                             | ---                                   | 1.06          | -1.01           | -1.05     | -1.13       | 1.03      | 1.11        | -1.17      | -1.05        | -1.37      | -1.24        | -2.94      | -2.38        |

| ID          | Gene Title                   | Chromosomal Location | 1st Gene Ontology Biological Process      | Pathway                             | A2497 30 mins | A2497P' 30 mins | A2497 2 h | A2497P' 2 h | A2497 4 h | A2497P' 4 h | A2497 24 h | A2497P' 24 h | A2497 48 h | A2497P' 48 h | A2497 72 h | A2497P' 72 h |
|-------------|------------------------------|----------------------|-------------------------------------------|-------------------------------------|---------------|-----------------|-----------|-------------|-----------|-------------|------------|--------------|------------|--------------|------------|--------------|
| RBM33       | RNA binding motif protein    | chr7q36.3            | 0                                         | ---                                 | -1.08         | -1.08           | 1.02      | -1.03       | -1.04     | -1.01       | 1.49       | 1.23         | 1.99       | 1.58         | 1.39       | -1.11        |
| RBM33       | RNA binding motif protein    | chr7q36.3            | 0                                         | ---                                 | 1.07          | 1.02            | 1.15      | 1.20        | -1.16     | 1.06        | 1.47       | 1.40         | 1.40       | 1.40         | 1.11       | -1.02        |
| RBM33       | RNA binding motif protein    | chr7q36.3            | 0                                         | ---                                 | 1.83          | 2.12            | -1.03     | -1.19       | 1.19      | 1.03        | 1.10       | 1.12         | -1.68      | -1.41        | -1.18      | -1.19        |
| RBM33       | RNA binding motif protein    | chr7q36.3            | 0                                         | ---                                 | 1.07          | 1.02            | 1.02      | -1.02       | -1.10     | -1.03       | -1.07      | -1.05        | -1.22      | -1.18        | 1.18       | 1.15         |
| RBM39       | RNA binding motif protein    | chr20q11.22          | transcription, DNA-dependent              | mRNA_processing_Reactome // GenMAPP | -1.01         | -1.02           | 1.06      | 1.07        | 1.13      | 1.18        | 1.02       | -1.21        | -2.07      | -1.75        | -1.70      | -1.22        |
| RBM39       | RNA binding motif protein    | chr20q11.22          | transcription, DNA-dependent              | mRNA_processing_Reactome // GenMAPP | -1.01         | 1.01            | -1.07     | -1.04       | -1.01     | -1.02       | -1.07      | -1.07        | -1.00      | 1.06         | -1.03      | -1.12        |
| RBM39       | RNA binding motif protein    | chr20q11.22          | transcription, DNA-dependent              | mRNA_processing_Reactome // GenMAPP | 1.11          | 1.06            | -1.08     | 1.08        | -1.01     | 1.03        | -1.20      | -1.10        | -1.43      | -1.30        | -1.49      | -1.63        |
| RBM4        | RNA binding motif protein    | chr11q13             | regulation of alternative mRNA splicing   | ---                                 | 1.26          | 1.03            | 1.12      | 1.41        | -1.03     | 1.16        | 1.05       | 1.08         | -1.56      | -1.39        | -1.57      | -1.61        |
| RBM4        | RNA binding motif protein    | chr11q13             | regulation of alternative mRNA splicing   | ---                                 | 1.26          | 1.20            | 1.12      | 1.22        | 1.16      | 1.04        | 1.12       | 1.08         | -1.35      | -1.44        | 1.21       | 1.09         |
| RBM41       | RNA binding motif protein    | chrXq22.3            | 0                                         | ---                                 | 1.12          | 1.12            | 1.09      | 1.05        | 1.11      | 1.22        | 1.00       | 1.03         | -1.66      | -1.42        | -1.46      | -1.07        |
| RBM41       | RNA binding motif protein    | chrXq22.3            | 0                                         | ---                                 | -1.01         | -1.01           | 1.07      | 1.06        | 1.02      | 1.01        | 1.05       | -1.02        | -1.48      | -1.14        | 1.28       | 1.16         |
| RBM45       | RNA binding motif protein    | chr2q31.2            | multicellular organismal development      | ---                                 | 1.14          | 1.08            | 1.08      | -1.00       | -1.17     | -1.02       | -1.32      | -1.06        | -2.53      | -2.51        | -2.30      | -2.74        |
| RBM48       | RNA binding motif protein    | chr7q21.2            | 0                                         | ---                                 | -1.20         | 1.19            | -1.31     | 1.11        | -1.20     | -1.20       | -1.71      | -1.09        | -1.33      | -1.08        | 2.39       | 1.82         |
| RBM48       | RNA binding motif protein    | chr7q21.2            | 0                                         | ---                                 | 1.01          | -1.15           | 1.00      | -1.00       | -1.02     | -1.10       | 1.16       | 1.08         | 1.55       | 1.27         | 1.79       | 1.43         |
| RBM48       | RNA binding motif protein    | chr7q21.2            | 0                                         | ---                                 | -1.10         | -1.10           | 1.06      | 1.03        | 1.01      | 1.23        | -1.24      | 1.04         | -1.03      | 1.03         | 1.12       | -1.13        |
| RBM4B       | RNA binding motif protein    | chr11q13             | mRNA processing                           | ---                                 | 1.06          | 1.12            | 1.02      | -1.06       | -1.04     | -1.01       | -1.33      | -1.06        | -2.21      | -2.27        | -1.88      | -1.83        |
| RBM5        | RNA binding motif protein    | chr3p21.3            | spliceosomal complex assembly             | mRNA_processing_Reactome // GenMAPP | 2.16          | 2.22            | 1.27      | 1.31        | -1.03     | 1.05        | 1.22       | -1.17        | -2.65      | -2.70        | -1.53      | -1.08        |
| RBM5        | RNA binding motif protein    | chr3p21.3            | spliceosomal complex assembly             | mRNA_processing_Reactome // GenMAPP | 1.08          | -1.07           | 1.23      | 1.11        | 1.21      | 1.23        | -1.08      | -1.15        | -1.93      | -1.67        | -1.69      | -2.03        |
| RBM5        | RNA binding motif protein    | chr3p21.3            | spliceosomal complex assembly             | mRNA_processing_Reactome // GenMAPP | 1.01          | 1.01            | 1.07      | 1.04        | 1.26      | -1.04       | 1.24       | 1.02         | -1.72      | -1.98        | -1.76      | -1.81        |
| RBM5        | RNA binding motif protein    | chr3p21.3            | spliceosomal complex assembly             | mRNA_processing_Reactome // GenMAPP | 1.04          | 1.02            | 1.02      | 1.06        | 1.10      | 1.04        | -1.02      | 1.00         | -1.82      | -1.92        | -1.83      | -1.65        |
| RBM6        | RNA binding motif protein    | chr3p21.3            | RNA processing                            | ---                                 | 1.09          | 1.03            | 1.10      | 1.19        | 1.13      | 1.23        | 1.06       | 1.03         | -2.48      | -2.36        | -2.21      | -1.75        |
| RBM7        | RNA binding motif protein    | chr11q23.1-q23.2     | meiosis                                   | ---                                 | -1.03         | 1.25            | -1.17     | 1.12        | -1.30     | -1.24       | -1.18      | 1.04         | 1.07       | -1.00        | -1.03      | 1.07         |
| RBM8A       | RNA binding motif protein    | chr11q21.1           | nuclear-transcribed mRNA catabolic pro    | ---                                 | -1.09         | -1.07           | 1.12      | -1.02       | 1.16      | -1.14       | -1.15      | 1.33         | -1.48      | -1.49        | -1.69      | -1.27        |
| RBM8A       | RNA binding motif protein    | chr11q21.1           | nuclear-transcribed mRNA catabolic pro    | ---                                 | 1.08          | 1.02            | -1.05     | -1.12       | 1.05      | 1.09        | -1.37      | -1.17        | -1.51      | -1.25        | -1.58      | -1.61        |
| RBM51       | RNA binding motif, single    | chr2q24.2            | DNA replication                           | ---                                 | 1.01          | -1.01           | 1.00      | -1.03       | -1.06     | 1.05        | 1.19       | 1.07         | 1.52       | 1.41         | 1.35       | 1.10         |
| RBM52       | RNA binding motif, single    | chr12q13.3           | RNA processing                            | ---                                 | 1.04          | -1.00           | 1.01      | -1.25       | 1.09      | 1.27        | 2.00       | 1.58         | 1.15       | 1.01         | 1.53       | 1.38         |
| RBM52       | RNA binding motif, single    | chr12q13.3           | RNA processing                            | ---                                 | -1.08         | 1.18            | 1.03      | -1.02       | -1.02     | 1.14        | 1.19       | 1.17         | 1.01       | -1.03        | -1.64      | -1.71        |
| RBM52       | RNA binding motif, single    | chr12q13.3           | RNA processing                            | ---                                 | 1.01          | -1.01           | 1.06      | 1.10        | 1.01      | 1.07        | 1.28       | 1.11         | -1.58      | -1.59        | -1.37      | -1.65        |
| RBM52       | RNA binding motif, single    | chr12q13.3           | RNA processing                            | ---                                 | -1.18         | -1.13           | 1.03      | 1.03        | -1.03     | 1.05        | 1.32       | 1.27         | 1.17       | 1.13         | 1.59       | 1.39         |
| RBM53       | RNA binding motif, single    | chr3p24-p23          | 0                                         | ---                                 | -1.16         | -1.26           | -1.11     | -1.28       | 1.11      | 1.21        | -1.23      | -1.27        | -2.02      | -1.56        | -2.37      | -1.85        |
| RBM53       | RNA binding motif, single    | chr3p24-p23          | 0                                         | ---                                 | -1.07         | -1.12           | -1.00     | 1.06        | 1.18      | 1.17        | 1.07       | 1.34         | -1.19      | -1.29        | -1.69      | -1.58        |
| RBM53       | RNA binding motif, single    | chr3p24-p23          | 0                                         | ---                                 | 1.16          | 1.11            | -1.01     | -1.03       | -1.00     | 1.13        | -1.11      | 1.05         | -1.20      | -1.45        | -1.90      | -1.96        |
| RBMX /// SN | RNA binding motif protein    | chrXq26.3            | regulation of alternative mRNA splicing   | ---                                 | -1.09         | 1.18            | 1.01      | 1.02        | 1.02      | -1.17       | 2.40       | 1.26         | 2.30       | 1.86         | 1.88       | 1.24         |
| RBMX /// SN | RNA binding motif protein    | chrXq26.3            | regulation of alternative mRNA splicing   | ---                                 | -1.64         | -2.89           | 1.33      | 1.41        | -1.37     | -1.20       | -1.74      | 1.25         | -3.55      | -4.95        | -4.24      | -2.65        |
| RBMX /// SN | RNA binding motif protein    | chrXq26.3            | regulation of alternative mRNA splicing   | ---                                 | 1.01          | 1.04            | -1.15     | -1.08       | -1.03     | 1.02        | -1.26      | -1.15        | -1.21      | -1.17        | -1.12      | -1.15        |
| RBMX /// SN | RNA binding motif protein    | chrXq26.3            | regulation of alternative mRNA splicing   | ---                                 | -1.11         | -1.08           | -1.10     | 1.01        | -1.03     | -1.05       | -1.01      | 1.02         | -1.09      | -1.15        | -1.16      | -1.15        |
| RBMXL2      | RNA binding motif protein    | chr11p15             | 0                                         | ---                                 | -1.66         | -1.70           | -1.48     | -2.54       | -1.21     | 2.85        | 1.64       | 4.92         | 1.14       | 1.37         | 1.06       | -1.77        |
| RBMX3AP     | RNA binding motif protein    | chrYp11.2            | 0                                         | ---                                 | -1.64         | -1.05           | -1.76     | -2.23       | 1.01      | -2.90       | 1.16       | 1.50         | -1.01      | 1.02         | -1.19      | -2.97        |
| RBP1        | retinol binding protein 1, c | chr3q23              | retinoid metabolic process                | ---                                 | -1.63         | -1.29           | -1.46     | 1.08        | 1.05      | -1.14       | 1.05       | 1.06         | -1.34      | 1.17         | -4.11      | -2.81        |
| RBP4        | retinol binding protein 4, p | chr10q23-q24         | retinoid metabolic process                | ---                                 | -1.03         | -1.19           | -1.10     | -1.01       | 1.47      | 1.27        | -1.77      | -1.01        | 1.31       | -1.27        | -4.13      | 1.40         |
| RBP7        | retinol binding protein 7, c | chr1p36.22           | transport                                 | ---                                 | -1.22         | -1.35           | -2.30     | -2.10       | 1.24      | -1.60       | -1.12      | -1.96        | -1.33      | -1.55        | 1.32       | 1.63         |
| RBPJ        | recombination signal bindin  | chr4p15.2            | negative regulation of transcription from | ---                                 | -1.07         | -1.04           | 1.06      | 1.01        | 1.12      | 1.02        | 1.13       | -1.00        | 1.27       | 1.38         | 1.10       | 1.27         |
| RBPJ        | recombination signal bindin  | chr4p15.2            | negative regulation of transcription from | ---                                 | -1.06         | 1.02            | -1.02     | 1.03        | 1.04      | 1.01        | 1.03       | -1.03        | -1.10      | 1.12         | -1.04      | 1.04         |
| RBPMS       | RNA binding protein with     | chr8p12              | transcription, DNA-dependent              | ---                                 | 1.13          | 1.07            | -1.14     | -1.11       | 1.10      | 1.02        | 1.32       | 1.06         | -1.04      | -1.08        | -1.01      | -1.08        |
| RBPMS       | RNA binding protein with     | chr8p12              | transcription, DNA-dependent              | ---                                 | 2.27          | 3.26            | 1.10      | -1.00       | -1.18     | -1.06       | -1.12      | -1.02        | -1.02      | -2.15        | -2.17      | -1.30        |
| RC3H1       | ring finger and CCCH-type    | chr1q25.1            | nuclear-transcribed mRNA catabolic pro    | ---                                 | 1.10          | 1.13            | -1.01     | 1.09        | -1.10     | -1.04       | -1.24      | -1.20        | -1.48      | -1.39        | -1.04      | -1.27        |
| RC3H1       | ring finger and CCCH-type    | chr1q25.1            | nuclear-transcribed mRNA catabolic pro    | ---                                 | 1.00          | 1.08            | -1.04     | -1.12       | -1.06     | 1.06        | 1.05       | 1.03         | -1.37      | 1.24         | 1.07       | 1.07         |
| RC3H2       | ring finger and CCCH-type    | chr9q34              | 0                                         | ---                                 | -1.01         | -1.11           | 1.06      | 1.11        | 1.03      | -1.01       | -1.33      | -1.27        | -1.44      | -1.13        | -1.14      | -1.01        |
| RC3H2       | ring finger and CCCH-type    | chr9q34              | 0                                         | ---                                 | -1.03         | -1.13           | -1.04     | 1.13        | -1.14     | -1.09       | 1.08       | 1.13         | 1.25       | 1.21         | -1.53      | -1.83        |
| RC3H2       | ring finger and CCCH-type    | chr9q34              | 0                                         | ---                                 | -1.13         | -1.09           | 1.07      | 1.09        | 1.06      | -1.02       | -1.00      | -1.08        | 1.11       | 1.10         | -1.22      | -1.18        |
| RC3H2       | ring finger and CCCH-type    | chr9q34              | 0                                         | ---                                 | -1.04         | -1.00           | 1.19      | 1.07        | -1.01     | -1.03       | 1.28       | 1.07         | 1.51       | 1.36         | 1.24       | 1.40         |
| RC3H2       | ring finger and CCCH-type    | chr9q34              | 0                                         | ---                                 | -1.13         | -1.03           | 1.08      | -1.10       | 1.18      | 1.08        | 1.14       | 1.08         | 1.17       | 1.06         | 1.11       | 1.25         |
| RCA1        | regulator of calcineurin 1   | chr21q22.12          | regulation of transcription, DNA-depend   | ---                                 | 1.07          | -1.08           | -1.00     | 1.09        | 1.08      | -1.02       | -1.18      | -1.04        | -1.11      | 1.08         | 1.32       | 1.51         |
| RCA1        | regulator of calcineurin 1   | chr21q22.12          | regulation of transcription, DNA-depend   | ---                                 | 1.07          | -1.08           | -1.00     | 1.09        | 1.08      | -1.02       | -1.18      | -1.04        | -1.11      | 1.08         | 1.32       | 1.51         |
| RCA1        | regulator of calcineurin 1   | chr21q22.12          | regulation of transcription, DNA-depend   | ---                                 | 1.07          | -1.08           | -1.00     | 1.09        | 1.08      | -1.02       | -1.18      | -1.04        | -1.11      | 1.08         | 1.32       | 1.51         |
| RCA1        | regulator of calcineurin 1   | chr21q22.12          | regulation of transcription, DNA-depend   | ---                                 | 1.07          | -1.08           | -1.00     | 1.09        | 1.08      | -1.02       | -1.18      | -1.04        | -1.11      | 1.08         | 1.32       | 1.51         |
| RCA1        | regulator of calcineurin 1   | chr21q22.12          | regulation of transcription, DNA-depend   | ---                                 | 1.07          | -1.08           | -1.00     | 1.09        | 1.08      | -1.02       | -1.18      | -1.04        | -1.11      | 1.08         | 1.32       | 1.51         |
| RCA1        | regulator of calcineurin 1   | chr21q22.12          | regulation of transcription, DNA-depend   | ---                                 | 1.07          | -1.08           | -1.00     | 1.09        | 1.08      | -1.02       | -1.18      | -1.04        | -1.11      | 1.08         | 1.32       | 1.51         |
| RCA1        | regulator of calcineurin 1   | chr21q22.12          | regulation of transcription, DNA-depend   | ---                                 | 1.07          | -1.08           | -1.00     | 1.09        | 1.08      | -1.02       | -1.18      | -1.04        | -1.11      | 1.08         | 1.32       | 1.51         |
| RCA1        | regulator of calcineurin 1   | chr21q22.12          | regulation of transcription, DNA-depend   | ---                                 | 1.07          | -1.08           | -1.00     | 1.09        | 1.08      | -1.02       | -1.18      | -1.04        | -1.11      | 1.08         | 1.32       | 1.51         |
| RCA1        | regulator of calcineurin 1   | chr21q22.12          | regulation of transcription, DNA-depend   | ---                                 | 1.07          | -1.08           | -1.00     | 1.09        | 1.08      | -1.02       | -1.18      | -1.04        | -1.11      | 1.08         | 1.32       | 1.51         |
| RCA1        | regulator of calcineurin 1   | chr21q22.12          | regulation of transcription, DNA-depend   | ---                                 | 1.07          | -1.08           | -1.00     | 1.09        | 1.08      | -1.02       | -1.18      | -1.04        | -1.11      | 1.08         | 1.32       | 1.51         |
| RCA1        | regulator of calcineurin 1   | chr21q22.12          | regulation of transcription, DNA-depend   | ---                                 | 1.07          | -1.08           | -1.00     | 1.09        | 1.08      | -1.02       | -1.18      | -1.04        | -1.11      | 1.08         | 1.32       | 1.51         |
| RCA1        | regulator of calcineurin 1   | chr21q22.12          | regulation of transcription, DNA-depend   | ---                                 | 1.07          | -1.08           | -1.00     | 1.09        | 1.08      | -1.02       | -1.18      | -1.04        | -1.11      | 1.08         | 1.32       | 1.51         |
| RCA1        | regulator of calcineurin 1   | chr21q22.12          | regulation of transcription, DNA-depend   | ---                                 | 1.07          | -1.08           | -1.00     | 1.09        | 1.08      | -1.02       | -1.18      | -1.04        | -1.11      | 1.08         | 1.32       | 1.51         |
| RCA1        | regulator of calcineurin 1   | chr21q22.12          | regulation of transcription, DNA-depend   | ---                                 | 1.07          | -1.08           | -1.00     | 1.09        | 1.08      | -1.02       | -1.18      | -1.04        | -1.11      | 1.08         | 1.32       | 1.51         |
| RCA1        | regulator of calcineurin 1   | chr21q22.12          | regulation of transcription, DNA-depend   | ---                                 | 1.07          | -1.08           | -1.00     | 1.09        | 1.08      | -1.02       | -1.18      | -1.04        | -1.11      | 1.08         | 1.32       | 1.51         |
| RCA1        | regulator of calcineurin 1   | chr21q22.12          | regulation of transcription, DNA-depend   | ---                                 | 1.07          | -1.08           | -1.00     | 1.09        | 1.08      | -1.02       | -1.18      | -1.04        | -1.11      | 1.08         | 1.32       | 1.51         |
| RCA1        | regulator of calcineurin 1   | chr21q22.12          | regulation of transcription, DNA-depend   | ---                                 | 1.07          | -1.08           | -1.00     | 1.09        | 1.08      | -1.02       | -1.18      | -1.04        | -1.11      | 1.08         | 1.32       | 1.51         |
| RCA1        | regulator of calcineurin 1   | chr21q22.12          | regulation of transcription, DNA-depend   | ---                                 | 1.07          | -1.08           | -1.00     | 1.09        | 1.08      | -1.02       | -1.18      | -1.04        | -1.11      | 1.08         | 1.32       | 1.51         |
| RCA1        | regulator of calcineurin 1   | chr21q22.12          | regulation of transcription, DNA-depend   | ---                                 | 1.07          | -1.08           | -1.00     | 1.09        | 1.08      | -1.02       | -1.18      | -1.04        | -1.11      | 1.08         | 1.32       | 1.51         |
| RCA1        | regulator of calcineurin 1   | chr21q22.12          | regulation of transcription, DNA-depend   | ---                                 | 1.07          | -1.08           | -1.00     | 1.09        | 1.08      | -1.02       | -1.18      | -1.04        | -1.11      | 1.08         | 1.32       | 1.51         |
| RCA1        | regulator of calcineurin 1   | chr21q22.12          | regulation of transcription, DNA-depend   | ---                                 | 1.07          | -1.08           | -1.00     | 1.09        | 1.08      | -1.02       | -1.18      | -1.04        | -1.11      | 1.08         | 1.32       | 1.51         |
| RCA1        | regulator of calcineurin 1   | chr21q22.12          | regulation of transcription, DNA-depend   | ---                                 | 1.07          | -1.08           | -1.00     | 1.09        | 1.08      | -1.02       | -1.18      | -1.04        | -1.11      | 1.08         | 1.32       | 1.51         |
| RCA1        | regulator of calcineurin 1   | chr21q22.12          | regulation of transcription, DNA-depend   | ---                                 | 1.07          | -1.08           | -1.00     | 1.09        | 1.08      | -1.02       | -1.18      | -1.04        | -1.11      | 1.08         | 1.32       | 1.51         |
| RCA1        | regulator of calcineurin 1   | chr21q22.12          | regulation of transcription, DNA-depend   | ---                                 | 1.07          | -1.08           | -1.00     | 1.09        | 1.08      | -1.02       | -1.18      | -1.04        | -1.11      | 1.08         | 1.32       | 1.51         |
| RCA1        | regulator of calcineurin 1   | chr21q2              |                                           |                                     |               |                 |           |             |           |             |            |              |            |              |            |              |

| ID     | Gene Title                     | Chromosomal Location | 1st Gene Ontology Biological Process      | Pathway                                 | A2497 30 mins | A2497P' 30 mins | A2497 2 h | A2497P' 2 h | A2497 4 h | A2497P' 4 h | A2497 24 h | A2497P' 24 h | A2497 48 h | A2497P' 48 h | A2497 72 h | A2497P' 72 h |
|--------|--------------------------------|----------------------|-------------------------------------------|-----------------------------------------|---------------|-----------------|-----------|-------------|-----------|-------------|------------|--------------|------------|--------------|------------|--------------|
| RCN2   | reticulocalbin 2, EF-hand c    | chr15q23             | 0                                         | ---                                     | 1.20          | 1.18            | 1.02      | 1.06        | -1.25     | -1.05       | -1.30      | -1.02        | -1.07      | -1.07        | -1.05      | -1.36        |
| RCN3   | reticulocalbin 3, EF-hand c    | chr19q13.33          | 0                                         | ---                                     | 1.52          | 1.21            | -1.15     | -1.06       | 1.51      | 1.78        | -1.05      | 1.10         | 2.10       | 1.70         | 3.31       | 3.67         |
| RCN3   | reticulocalbin 3, EF-hand c    | chr19q13.33          | 0                                         | ---                                     | -1.03         | 1.43            | -1.04     | -1.29       | -1.76     | -1.27       | -1.87      | 1.02         | 2.02       | 1.56         | 3.78       | 4.70         |
| RCOR1  | REST corepressor 1             | chr14q32.31          | transcription, DNA-dependent              | ---                                     | -1.04         | -1.00           | -1.01     | -1.07       | 1.04      | 1.03        | -1.07      | -1.16        | 1.13       | 1.15         | 1.32       | 1.25         |
| RCOR2  | REST corepressor 2             | chr11q13.1           | transcription, DNA-dependent              | ---                                     | 1.42          | -1.04           | -1.25     | -1.32       | 1.39      | 1.14        | 1.09       | 1.05         | -1.77      | -1.27        | 1.62       | 1.88         |
| RCOR3  | REST corepressor 3             | chr1q32.2            | transcription, DNA-dependent              | ---                                     | 1.18          | 1.05            | 1.12      | -1.30       | 1.02      | -1.14       | -1.33      | -1.02        | -1.35      | -1.55        | -1.06      | -1.15        |
| RCOR3  | REST corepressor 3             | chr1q32.2            | transcription, DNA-dependent              | ---                                     | 1.11          | 1.09            | 1.01      | -1.02       | -1.08     | -1.02       | -1.11      | -1.18        | -2.14      | -1.98        | -1.91      | -1.96        |
| RCSD1  | RCS domain containing 1        | chr1q24.2            | skeletal muscle contraction               | ---                                     | 1.28          | 3.53            | 1.77      | 3.09        | -1.30     | 1.21        | -1.89      | 1.43         | 8.08       | 7.12         | 2.45       | 1.61         |
| RCVRN  | recoverin                      | chr17p13.1           | signal transduction                       | ---                                     | 1.81          | 1.37            | 1.65      | 1.31        | -1.20     | 1.08        | 2.74       | 1.73         | 2.07       | -1.12        | -4.30      | -1.42        |
| RDH10  | retinol dehydrogenase 10       | chr8q21.11           | retinoid metabolic process                | ---                                     | 1.30          | 1.25            | 1.11      | -1.07       | 1.20      | 1.10        | -1.36      | -1.27        | -1.65      | -1.78        | -1.30      | -1.85        |
| RDH10  | retinol dehydrogenase 10       | chr8q21.11           | retinoid metabolic process                | ---                                     | 1.01          | 1.03            | 1.04      | -1.09       | 1.01      | 1.01        | -1.47      | -1.24        | -1.87      | -1.60        | -1.15      | -1.28        |
| RDH11  | retinol dehydrogenase 11       | chr14q24.1           | retinoid metabolic process                | ---                                     | 1.00          | -1.01           | 1.02      | 1.07        | 1.08      | 1.04        | 1.05       | -1.01        | 1.75       | 1.72         | 1.68       | 1.89         |
| RDH11  | retinol dehydrogenase 11       | chr14q24.1           | retinoid metabolic process                | ---                                     | 1.03          | 1.30            | 1.06      | -1.24       | -1.01     | 1.00        | -1.12      | 1.06         | 1.20       | 1.44         | 1.24       | 1.23         |
| RDH13  | retinol dehydrogenase 13       | chr19q13.42          | metabolic process                         | ---                                     | 1.10          | 1.01            | 1.05      | 1.13        | -1.07     | 1.21        | -1.24      | -1.16        | -1.17      | -1.28        | -1.30      | -1.42        |
| RDM1   | RAD52 motif 1                  | chr17q11.2           | DNA repair                                | ---                                     | -1.08         | 1.01            | -1.15     | -1.23       | 1.52      | 1.53        | 1.22       | 1.17         | 2.09       | 2.16         | 1.80       | 1.78         |
| RDX    | radixin                        | chr11q23             | cytoskeleton organization                 | ---                                     | 1.04          | 1.09            | -1.04     | 1.01        | -1.11     | -1.00       | -1.26      | -1.21        | -1.48      | -1.24        | -1.27      | -1.49        |
| RECK   | reversion-inducing-cysteine    | chr9p13.3            | blood vessel maturation                   | ---                                     | 1.17          | 1.01            | 1.23      | 1.12        | 1.15      | 1.18        | -1.39      | 1.02         | -2.20      | -1.88        | -1.57      | -2.25        |
| RECK   | reversion-inducing-cysteine    | chr9p13.3            | blood vessel maturation                   | ---                                     | 1.02          | 1.04            | 1.06      | -1.05       | 1.02      | 1.08        | -1.13      | 1.01         | -1.16      | -1.04        | -1.55      | -1.32        |
| RECQL  | RecQ protein-like (DNA heli    | chr12p12             | DNA strand renaturation                   | ---                                     | 1.15          | 1.14            | -1.03     | 1.03        | -1.09     | -1.08       | 1.08       | 1.11         | 1.15       | 1.27         | 1.32       | 1.35         |
| RECQL5 | RecQ protein-like 5            | chr17q25             | DNA metabolic process                     | ---                                     | 1.02          | -1.18           | 1.13      | 1.04        | 1.06      | -1.18       | -1.19      | 1.02         | -1.36      | -1.48        | -1.56      | -1.26        |
| REEP2  | receptor accessory protein 2   | chr5q31              | protein transport into membrane raft      | ---                                     | -1.05         | -1.26           | 1.09      | 1.04        | 1.28      | -1.12       | -1.23      | -1.06        | 1.43       | 1.58         | 1.41       | 1.66         |
| REEP4  | receptor accessory protein 4   | chr8p21.3            | nuclear envelope organization             | ---                                     | 1.03          | 1.03            | 1.22      | 1.12        | -1.03     | 1.04        | 1.10       | 1.44         | 1.22       | 1.07         | 1.19       | 1.41         |
| REEP5  | receptor accessory protein 5   | chr5q22-q23          | 0                                         | ---                                     | -1.07         | -1.06           | -1.01     | 1.02        | 1.02      | 1.02        | -1.13      | -1.01        | -1.12      | -1.03        | -1.26      | -1.11        |
| REEP6  | receptor accessory protein 6   | chr19p13.3           | 0                                         | ---                                     | -1.19         | -1.26           | -1.18     | -1.32       | -1.37     | -1.32       | 1.05       | 1.19         | 1.76       | 2.28         | 1.23       | 1.50         |
| REG3A  | regenerating islet-derived 3   | chr2p12              | acute-phase response                      | ---                                     | -2.61         | -1.29           | -1.67     | -1.06       | -3.23     | 1.12        | -1.82      | -1.18        | 2.64       | 2.71         | 2.16       | 1.66         |
| REG3A  | regenerating islet-derived 3   | chr2p12              | acute-phase response                      | ---                                     | 3.44          | 1.17            | -1.05     | 1.77        | 2.26      | 1.04        | 1.73       | -1.25        | 4.91       | 5.57         | 3.88       | 3.97         |
| RELA   | v-rel reticulendotheliosis     | chr11q13             | liver development                         | Apoptosis // GenMAPP /// Apoptosis_GenM | -1.20         | -1.17           | 1.08      | 1.13        | -1.01     | -1.00       | 1.22       | 1.28         | 1.55       | 1.49         | 1.69       | 1.74         |
| RELA   | v-rel reticulendotheliosis     | chr11q13             | liver development                         | Apoptosis // GenMAPP /// Apoptosis_GenM | -1.33         | 1.00            | -1.10     | 1.06        | 1.21      | 1.06        | 1.07       | -1.33        | 1.97       | 2.00         | 1.76       | 2.24         |
| RELB   | v-rel reticulendotheliosis     | chr19q13.32          | transcription, DNA-dependent              | ---                                     | -1.17         | -1.00           | -1.17     | 1.18        | -1.00     | -1.05       | 1.60       | 1.62         | 1.92       | 1.75         | 1.60       | 1.83         |
| RELT   | RELT tumor necrosis factor     | chr11q13.4           | 0                                         | ---                                     | 1.10          | -1.01           | -1.03     | 1.38        | 1.02      | -1.02       | 1.52       | 1.24         | 1.64       | 1.32         | 1.56       | 1.48         |
| REPS1  | RALBP1 associated Eps domai    | chr6q24.1            | receptor-mediated endocytosis             | ---                                     | 1.63          | 2.43            | -3.71     | -1.62       | 3.75      | 5.63        | 1.32       | -2.40        | 2.51       | 3.74         | 5.06       | 1.02         |
| REPS1  | RALBP1 associated Eps domai    | chr6q24.1            | receptor-mediated endocytosis             | ---                                     | 1.03          | -1.01           | 1.02      | 1.04        | 1.01      | -1.11       | -1.11      | -1.05        | -1.66      | -1.82        | -1.76      | -1.72        |
| REPS2  | RALBP1 associated Eps domai    | chrXp22.2            | protein complex assembly                  | ---                                     | -1.08         | -1.16           | 1.16      | -1.04       | -1.15     | -1.03       | 1.04       | -1.67        | -1.85      | -1.04        | 1.11       | ---          |
| REPS2  | RALBP1 associated Eps domai    | chrXp22.2            | protein complex assembly                  | ---                                     | -1.31         | -1.31           | -1.04     | 1.27        | -1.06     | -1.18       | 1.29       | 1.07         | 1.13       | -1.06        | 1.45       | 1.59         |
| RER1   | RER1 retention in endoplasmic  | chr1p36              | retrograde vesicle-mediated transport, Ge | ---                                     | -1.08         | -1.04           | -1.04     | -1.08       | -1.01     | -1.00       | 1.00       | 1.05         | 1.04       | 1.05         | 1.04       | 1.14         |
| RER1   | RER1 retention in endoplasmic  | chr1p36              | retrograde vesicle-mediated transport, Ge | ---                                     | -1.17         | -1.12           | -1.08     | -1.06       | -1.01     | -1.10       | -1.13      | 1.01         | 1.18       | 1.21         | 1.33       | 1.53         |
| RRG    | RAS-like, estrogen-regulate    | chr12p12.3           | GTP catalytic process                     | ---                                     | 1.40          | 1.38            | -1.30     | -1.34       | -1.26     | -1.01       | -1.30      | -1.36        | -1.49      | -1.04        | -1.55      | -2.12        |
| RRG    | RAS-like, estrogen-regulate    | chr12p12.3           | GTP catalytic process                     | ---                                     | 1.02          | 1.12            | -1.00     | -1.12       | -1.08     | -1.01       | 1.03       | 1.03         | -1.35      | -1.03        | -1.35      | -1.38        |
| REST   | RE1-silencing transcription    | chr4q12              | negative regulation of transcription from | ---                                     | 1.17          | 1.04            | 1.04      | 1.10        | -1.12     | 1.24        | -1.30      | -1.27        | -1.12      | 1.04         | -1.24      | -1.29        |
| RET    | ret proto-oncogene             | chr10q11.2           | MAPK cascade                              | ---                                     | 1.15          | -1.18           | 1.30      | -2.29       | -1.32     | 1.34        | 7.58       | 4.40         | 3.85       | 3.28         | 1.01       | 2.13         |
| RET    | ret proto-oncogene             | chr10q11.2           | MAPK cascade                              | ---                                     | 1.50          | 1.54            | -1.03     | -1.75       | -1.48     | -1.49       | 1.17       | -1.42        | 1.47       | 1.20         | -2.17      | -2.08        |
| RETSAT | retinol saturase (all-trans-re | chr2p11.2            | retinol metabolic process                 | ---                                     | 1.07          | -1.03           | 1.04      | 1.05        | 1.11      | -1.08       | -1.01      | 1.02         | 1.11       | 1.05         | 1.42       | 1.50         |
| REV1   | REV1, polymerase (DNA d        | chr2q11.1-q11.2      | DNA replication                           | ---                                     | 1.08          | 1.04            | 1.05      | -1.04       | 1.05      | 1.03        | -1.10      | -1.02        | -1.02      | -1.13        | 1.14       | 1.16         |
| REV1   | REV1, polymerase (DNA d        | chr2q11.1-q11.2      | DNA replication                           | ---                                     | -1.04         | -1.02           | -1.03     | -1.11       | 1.11      | 1.12        | -1.20      | -1.02        | -1.71      | -1.32        | -1.33      | -1.34        |
| REV3L  | REV3-like, polymerase (D       | chr6q21              | nucleobase-containing compound metabo     | ---                                     | 1.21          | 1.13            | 1.11      | 1.11        | -1.03     | 1.21        | -1.39      | -1.17        | -1.93      | -1.44        | -1.91      | -2.17        |
| REXO1  | REX1, RNA exonuclease 1        | chr19p13.3           | 0                                         | ---                                     | -1.17         | -1.54           | -1.05     | -1.29       | 1.18      | -1.02       | 1.51       | 2.32         | 1.53       | -1.41        | 2.87       | 3.54         |
| REXO2  | RNA exonuclease 2              | chr11q23.2           | nucleobase-containing compound metabo     | ---                                     | -1.00         | 1.05            | -1.07     | -1.05       | -1.09     | -1.07       | 1.04       | 1.09         | -1.05      | -1.02        | -1.06      | ---          |
| RFC1   | replication factor C (activat  | chr4p14-p13          | S phase of mitotic cell cycle             | DNA_replication_Reactome // GenMAPP     | 1.17          | 1.21            | 1.01      | -1.04       | -1.09     | -1.09       | 1.17       | -1.04        | 1.05       | 1.07         | 1.23       | 1.25         |
| RFC3   | replication factor C (activat  | chr13q13.2           | cell cycle checkpoint                     | DNA_replication_Reactome // GenMAPP     | -1.14         | -1.15           | 1.05      | 1.37        | 1.17      | 1.31        | 1.25       | 1.06         | -1.52      | -1.45        | -1.20      | -1.03        |
| RFC3   | replication factor C (activat  | chr13q13.2           | cell cycle checkpoint                     | DNA_replication_Reactome // GenMAPP     | 1.18          | 1.13            | -1.08     | 1.00        | 1.07      | 1.02        | -1.12      | -1.19        | -1.27      | -1.24        | -1.04      | -1.12        |
| RFC5   | replication factor C (activat  | chr12q24.23          | mitotic cell cycle                        | DNA_replication_Reactome // GenMAPP     | 1.02          | -1.02           | -1.07     | 1.01        | -1.03     | 1.05        | -1.15      | -1.12        | -1.01      | 1.18         | 1.03       | 1.15         |
| RFC5   | replication factor C (activat  | chr12q24.23          | cell cycle checkpoint                     | DNA_replication_Reactome // GenMAPP     | -1.02         | 1.05            | -1.01     | -1.01       | -1.04     | 1.01        | -1.09      | -1.13        | -1.52      | -1.20        | -1.44      | -1.46        |
| RFC5   | replication factor C (activat  | chr12q24.23          | cell cycle checkpoint                     | DNA_replication_Reactome // GenMAPP     | 1.15          | 1.05            | -1.06     | -1.02       | 1.21      | 1.13        | -1.04      | -1.23        | -1.23      | -1.31        | -1.16      | -1.03        |
| RFESD  | Rieske (Fe-S) domain contai    | chr5q15              | oxidation-reduction process               | ---                                     | -1.12         | -1.15           | 1.23      | 1.23        | 1.03      | 1.08        | 1.33       | 1.16         | 1.53       | 1.81         | 1.27       | 1.67         |
| RFFL   | ring finger and FYVE-like      | chr17q12             | intracellular protein transport           | ---                                     | -1.05         | -1.22           | 1.08      | -1.01       | 1.02      | 1.28        | 1.04       | 1.07         | 1.11       | 1.73         | 1.02       | -1.02        |
| RFK    | riboflavin kinase              | chr9q21.13           | vitamin metabolic process                 | ---                                     | 1.12          | 1.07            | 1.03      | 1.09        | 1.02      | 1.21        | -1.13      | -1.03        | -1.55      | -1.50        | -1.45      | -1.70        |
| RFK    | riboflavin kinase              | chr9q21.13           | vitamin metabolic process                 | ---                                     | 1.04          | 1.05            | -1.06     | -1.07       | -1.05     | 1.14        | -1.14      | 1.05         | -1.35      | -1.33        | -1.46      | -1.49        |
| RFNG   | RFNG O-fucosylpeptide 3-       | chr17q25             | multicellular organismal development      | ---                                     | -1.01         | -1.14           | 1.12      | 1.09        | -1.38     | 1.03        | 1.30       | 1.01         | 1.10       | 1.12         | 1.66       | 1.81         |
| RFPL1S | RFPL1 antisense RNA 1          | chr22q12             | 0                                         | ---                                     | 1.47          | 1.35            | 1.08      | 1.19        | -1.32     | 1.09        | 1.19       | 1.17         | -1.66      | -1.37        | -1.40      | -1.54        |
| RFPL3S | RFPL3 antisense                | chr22q12.3           | 0                                         | ---                                     | 1.27          | 2.47            | 1.00      | -3.24       | 1.91      | 1.57        | -1.17      | -1.06        | 1.95       | 1.32         | 2.47       | 3.12         |
| RFTN1  | raftlin, lipid raft linker 1   | chr3p24.3            | 0                                         | ---                                     | 1.01          | -1.09           | 1.11      | 1.27        | -1.04     | -1.05       | 1.55       | 1.33         | -1.52      | -1.78        | -3.29      | -3.28        |
| RFWD2  | ring finger and WD repeat      | chr1q25.1-q25.2      | cell cycle checkpoint                     | ---                                     | 1.10          | 1.18            | -1.04     | -1.04       | 1.04      | -1.05       | -1.12      | -1.13        | -1.35      | -1.35        | -1.08      | -1.33        |
| RFX1   | regulatory factor X, 1 (infl   | chr19p13.1           | transcription, DNA-dependent              | ---                                     | 1.06          | 1.19            | 1.01      | -1.36       | 1.41      | 1.41        | 1.15       | 1.27         | -1.23      | -1.01        | -1.40      | -1.03        |
| RFX3   | regulatory factor X, 3 (infl   | chr9p24.2            | transcription, DNA-dependent              | ---                                     | -1.15         | -1.15           | -1.07     | 1.01        | -1.04     | 1.14        | -1.10      | -1.18        | -3.41      | -2.12        | -3.07      | -3.39        |
| RFX3   | regulatory factor X, 3 (infl   | chr9p24.2            | transcription, DNA-dependent              | ---                                     | -1.05         | 1.16            | -1.07     | 1.11        | -1.03     | -1.21       | 1.08       | 1.17         | -5.50      | -3.12        | -4.83      | -3.63        |
| RFX4   | regulatory factor X, 4 (infl   | chr12q24             | transcription, DNA-dependent              | ---                                     | 1.05          | -1.59           | 1.06      | -1.43       | 2.93      | 2.31        | 3.44       | 1.99         | 6.69       | 1.96         | 2.59       | 3.24         |

| ID           | Gene Title                      | Chromosomal Location | 1st Gene Ontology Biological Process       | Pathway                                     | A2497 30 mins | A2497P' 30 mins | A2497 2 h | A2497P' 2 h | A2497 4 h | A2497P' 4 h | A2497 24 h | A2497P' 24 h | A2497 48 h | A2497P' 48 h | A2497 72 h | A2497P' 72 h |
|--------------|---------------------------------|----------------------|--------------------------------------------|---------------------------------------------|---------------|-----------------|-----------|-------------|-----------|-------------|------------|--------------|------------|--------------|------------|--------------|
| RFX5         | regulatory factor X, 5 (infl)   | chr1q21              | negative regulation of transcription from  | ---                                         | 1.00          | 1.02            | -1.05     | -1.01       | -1.06     | -1.01       | -1.02      | 1.02         | -1.03      | 1.03         | -1.09      | -1.15        |
| RFXANK       | regulatory factor X-associated  | chr19p12             | transcription, DNA-dependent               | ---                                         | -1.06         | -1.00           | -1.01     | 1.03        | 1.15      | 1.08        | -1.31      | -1.04        | -1.43      | -1.46        | -1.59      | -1.32        |
| RFXAP        | regulatory factor X-associated  | chr13q14             | positive regulation of transcription, DNA  | ---                                         | 1.05          | 1.17            | -1.04     | -1.11       | -1.14     | -1.02       | -1.46      | 1.07         | -2.47      | -2.15        | -1.86      | -1.98        |
| RGCC         | regulator of cell cycle         | chr13q14.11          | negative regulation of exit from mitosis   | ---                                         | 1.29          | 1.20            | -1.06     | 1.12        | 1.15      | -1.01       | 1.12       | 1.27         | -3.08      | -3.00        | -2.57      | -2.60        |
| RGCC         | regulator of cell cycle         | chr13q14.11          | negative regulation of exit from mitosis   | ---                                         | 1.24          | 1.02            | 1.08      | 1.02        | -1.08     | -1.08       | 1.19       | 1.27         | -2.91      | -3.41        | -3.10      | -2.95        |
| RGL1         | rat guanine nucleotide dissoc   | chr1q25.3            | signal transduction                        | ---                                         | 1.21          | -1.05           | -1.01     | -1.06       | 1.17      | 1.07        | -1.07      | -1.16        | -2.50      | -1.92        | -1.83      | -1.65        |
| RGL2         | rat guanine nucleotide dissoc   | chr6p21.3            | signal transduction                        | ---                                         | 1.09          | -1.11           | -1.01     | 1.51        | -1.13     | -1.14       | 1.15       | 1.28         | 1.40       | 1.36         | -1.01      | 1.40         |
| RGP1         | RGP1 retrograde golgi transp    | chr9pter-p22.1       | 0                                          | ---                                         | -1.10         | -1.00           | 1.00      | 1.02        | -1.02     | -1.15       | 1.01       | -1.02        | -1.17      | -1.28        | 1.25       | 1.24         |
| RGPD3 /// RC | RANBP2-like and GRIP domain     | chr2q12.3 /// chr2q1 | protein targeting to Golgi                 | ---                                         | 1.11          | 1.15            | -1.02     | -1.02       | -1.05     | 1.06        | -1.40      | -1.15        | -1.87      | -1.74        | -1.27      | -1.41        |
| RGPD3 /// RC | RANBP2-like and GRIP domain     | chr2q12.3 /// chr2q1 | protein targeting to Golgi                 | ---                                         | -1.11         | -1.16           | 1.07      | 1.08        | 1.15      | -1.05       | 1.30       | 1.05         | 1.80       | 1.57         | 1.93       | 1.80         |
| RGR          | retinal G protein coupled recep | chr10q23             | chemotaxis                                 | GPCRDB, Class_A, Rhodopsin-like // GenM     | -1.68         | -1.52           | 2.78      | 1.16        | -3.63     | -5.28       | 4.99       | 5.23         | 3.85       | 2.87         | 2.11       | 1.81         |
| RGS1         | regulator of G-protein signa    | chr1q31              | immune response                            | Calcium_regulation_in_cardiac_cells // GenM | -3.32         | 1.10            | 1.34      | 1.05        | 2.55      | 9.82        | -2.08      | -1.02        | 2.71       | 1.07         | -4.61      | 1.60         |
| RGS10        | regulator of G-protein signa    | chr10q25             | negative regulation of signal transduction | Calcium_regulation_in_cardiac_cells // GenM | -1.14         | -1.11           | -1.06     | -1.11       | 1.01      | -1.06       | 1.22       | 1.08         | -1.01      | 1.02         | 1.18       | 1.14         |
| RGS12        | regulator of G-protein signa    | chr4p16.3            | transcription, DNA-dependent               | ---                                         | -1.09         | -1.02           | 1.25      | 1.16        | -1.06     | -1.21       | 1.08       | 1.05         | -1.69      | -1.21        | -1.66      | -1.47        |
| RGS12        | regulator of G-protein signa    | chr4p16.3            | transcription, DNA-dependent               | ---                                         | -1.10         | -1.04           | -1.30     | 1.38        | 1.29      | 1.28        | 1.00       | -1.01        | -1.34      | -1.71        | -1.80      | -1.47        |
| RGS12        | regulator of G-protein signa    | chr4p16.3            | transcription, DNA-dependent               | ---                                         | 4.18          | 3.96            | -1.10     | 1.16        | 2.12      | -1.15       | -1.27      | -3.30        | 2.01       | -1.16        | 1.46       | 1.78         |
| RGS18        | regulator of G-protein signa    | chr1q31.2            | G-protein coupled receptor signaling path  | Calcium_regulation_in_cardiac_cells // GenM | -1.38         | -1.65           | 1.27      | -2.15       | 1.27      | -1.28       | -2.44      | -1.62        | 4.08       | 1.83         | 2.98       | 2.08         |
| RGS19        | regulator of G-protein signa    | chr20q13.33          | autophagy                                  | Calcium_regulation_in_cardiac_cells // GenM | 1.13          | -1.00           | 1.03      | 1.03        | -1.08     | 1.05        | 1.01       | 1.30         | 1.65       | 1.37         | 1.51       | 1.12         |
| RGS2         | regulator of G-protein signa    | chr1q31              | regulation of translation                  | ---                                         | 1.04          | 1.06            | 1.06      | 1.15        | 1.18      | 1.10        | 1.29       | 1.04         | 2.69       | 2.04         | 1.38       | 1.52         |
| RGS5         | regulator of G-protein signa    | chr1q23.1            | signal transduction                        | Calcium_regulation_in_cardiac_cells // GenM | 1.34          | -1.09           | -1.14     | -1.11       | 1.16      | 1.03        | -1.37      | 1.25         | -2.98      | -2.53        | -4.13      | -2.12        |
| RGS5         | regulator of G-protein signa    | chr1q23.1            | signal transduction                        | Calcium_regulation_in_cardiac_cells // GenM | 1.76          | 1.26            | -1.27     | -1.19       | 1.21      | 1.55        | -1.12      | -1.60        | 1.16       | -1.26        | -2.01      | -1.56        |
| RGS7         | regulator of G-protein signa    | chr1q431q23.1        | G-protein coupled receptor signaling path  | Calcium_regulation_in_cardiac_cells // GenM | -7.56         | -2.13           | 2.02      | 1.65        | 1.32      | 1.35        | -7.98      | -1.72        | -1.19      | -1.00        | -1.00      | 1.68         |
| RGS8 /// SDF | regulator of G-protein signa    | chr1q25 /// chr5p15  | termination of G-protein coupled recepto   | ---                                         | 1.17          | 1.12            | 1.07      | 1.26        | 1.23      | 1.08        | 1.04       | -1.05        | -2.97      | -2.85        | -4.10      | -2.59        |
| RGS9BP       | regulator of G protein signa    | chr19q13.11          | visual perception                          | ---                                         | -1.11         | 1.27            | 1.09      | 1.02        | 1.46      | -1.30       | -1.34      | -1.42        | 2.59       | 2.68         | 1.41       | 1.75         |
| RHBD1        | rhomboid domain containin       | chr2q36.3            | proteolysis                                | ---                                         | 1.05          | -1.07           | 1.08      | 1.29        | -1.01     | -1.05       | -1.04      | 1.09         | 1.36       | 1.15         | 1.57       | 1.73         |
| RHBD1        | rhomboid domain containin       | chr2q36.3            | proteolysis                                | ---                                         | -2.39         | -1.26           | -1.27     | -1.27       | -1.09     | -1.77       | 3.22       | 1.98         | -1.19      | 1.07         | -1.41      | -1.48        |
| RHBD3        | rhomboid domain containin       | chr22q12.2           | 0                                          | ---                                         | -1.69         | -1.32           | 2.05      | 1.75        | 1.24      | 1.08        | 1.56       | 1.33         | -1.39      | -1.72        | -1.45      | -1.28        |
| RHBD2        | rhomboid 5 homolog 2 (Dros      | chr17q25.1           | proteolysis                                | ---                                         | -1.17         | 1.01            | 1.09      | 1.07        | 1.19      | 1.39        | 1.51       | 1.19         | 1.66       | 1.53         | 1.60       | 1.64         |
| RHBD2        | rhomboid, veinlet-like 2 (Dros  | chr1p34.3            | proteolysis                                | ---                                         | -1.21         | -1.17           | -1.07     | -1.07       | -1.20     | -1.39       | -1.07      | -1.07        | -1.41      | -1.28        | -1.45      | -1.36        |
| RHBG         | Rh family, B glycoprotein       | chr1q21.3            | transport                                  | ---                                         | 1.72          | 1.29            | 1.21      | 1.65        | 2.18      | 1.11        | -2.53      | -1.69        | 1.52       | 2.30         | -1.52      | 1.32         |
| RHCE         | Rh blood group, CcEe anti       | chr1p36.11           | ammonium transport                         | ---                                         | 1.43          | -1.43           | -2.82     | -2.38       | -1.01     | -3.16       | 1.03       | -1.86        | 2.43       | 1.08         | -2.02      | -1.93        |
| RHEBL1       | Ras homolog enriched in b       | chr12q13.12          | GTP catabolic process                      | ---                                         | -1.70         | -1.70           | -1.08     | 1.15        | 1.31      | -1.03       | 3.70       | 2.21         | 1.56       | 1.27         | 1.76       | 1.49         |
| RHEBL1       | Ras homolog enriched in b       | chr12q13.12          | GTP catabolic process                      | ---                                         | -1.47         | -1.34           | 1.03      | -1.24       | 1.12      | 1.25        | 2.40       | 1.81         | 1.44       | 1.31         | 1.44       | 1.50         |
| RHNO1        | RAD9-HUS1-RAD1 interact         | chr12p13.33          | DNA damage checkpoint                      | ---                                         | 1.05          | 1.07            | -1.07     | -1.05       | -1.03     | -1.06       | -1.09      | -1.05        | -1.14      | -1.18        | -1.05      | -1.03        |
| RHOB         | ras homolog family membe        | chr2p24              | cytokinesis                                | ---                                         | 1.98          | 2.59            | -1.61     | -1.20       | 1.05      | 2.21        | 3.40       | 1.66         | 1.89       | 1.48         | 3.71       | 2.27         |
| RHOB         | ras homolog family membe        | chr2p24              | cytokinesis                                | ---                                         | 1.81          | 2.27            | 8.22      | 13.81       | -1.30     | -1.03       | 1.11       | 1.82         | -1.21      | 1.78         | 12.11      | 5.97         |
| RHOB         | ras homolog family membe        | chr2p24              | cytokinesis                                | ---                                         | 1.01          | 1.07            | -1.04     | -1.15       | -1.17     | -1.09       | 1.06       | -1.08        | 1.35       | 1.35         | 1.43       | 1.41         |
| RHOB         | ras homolog family membe        | chr2p24              | cytokinesis                                | ---                                         | -1.13         | -1.07           | -1.42     | -5.32       | -1.67     | -3.79       | -2.41      | 1.20         | 1.79       | 1.49         | 2.42       | 2.58         |
| RHOBTB1      | Rho-related BTB domain c        | chr10q21.2           | GTP catabolic process                      | ---                                         | -1.05         | -1.13           | 1.13      | 1.13        | 1.03      | 1.05        | -1.24      | -1.08        | -2.95      | -2.07        | -3.06      | -2.62        |
| RHOBTB2      | Rho-related BTB domain c        | chr8p21.3            | GTP catabolic process                      | ---                                         | -1.06         | 1.02            | 1.12      | 1.19        | 1.11      | -1.06       | 1.48       | 1.18         | -1.58      | -1.45        | -2.06      | -1.69        |
| RHOBTB2      | Rho-related BTB domain c        | chr8p21.3            | GTP catabolic process                      | ---                                         | -1.07         | -1.02           | 1.12      | 1.10        | -1.01     | 1.01        | -1.23      | -1.11        | -1.30      | -1.35        | -1.76      | -1.69        |
| RHOBTB3      | Rho-related BTB domain c        | chr5q15              | ATP catabolic process                      | ---                                         | 1.15          | 1.22            | -1.08     | -1.09       | -1.20     | -1.04       | -1.26      | -1.12        | -1.82      | -1.71        | -1.99      | -2.31        |
| RHOBTB3      | Rho-related BTB domain c        | chr5q15              | ATP catabolic process                      | ---                                         | 1.04          | 1.04            | -1.11     | -1.15       | 1.05      | 1.05        | -1.01      | -1.03        | -2.04      | -1.69        | -1.95      | -2.06        |
| RHOBTB3      | Rho-related BTB domain c        | chr5q15              | ATP catabolic process                      | ---                                         | -1.01         | -1.04           | 1.00      | -1.06       | -1.02     | 1.07        | -1.22      | -1.12        | -1.59      | -1.25        | -2.07      | -1.93        |
| RHOBTB3      | Rho-related BTB domain c        | chr5q15              | ATP catabolic process                      | ---                                         | 1.04          | 1.01            | -1.02     | -1.35       | 1.10      | -1.06       | -1.09      | -1.02        | -2.05      | -1.50        | -1.85      | -2.12        |
| RHOC         | ras homolog family membe        | chr1p13.1            | cytokinesis                                | ---                                         | -1.03         | 1.00            | 1.07      | 1.38        | 1.00      | -1.02       | -1.32      | 1.12         | -2.80      | -2.17        | -3.25      | -2.67        |
| RHOC         | ras homolog family membe        | chr1p13.1            | cytokinesis                                | ---                                         | -1.01         | -1.04           | 1.03      | -1.02       | 1.03      | -1.05       | 1.09       | -1.05        | 2.19       | 1.90         | 1.90       | 1.95         |
| RHOD         | ras homolog family membe        | chr11q14.3           | GTP catabolic process                      | ---                                         | 1.06          | -1.18           | -1.04     | 1.10        | -1.30     | -1.21       | 1.00       | 1.28         | 1.06       | 1.17         | -1.35      | -1.14        |
| RHOF         | ras homolog family membe        | chr12q24.31          | GTP catabolic process                      | ---                                         | -1.07         | -1.27           | 1.06      | 1.10        | 1.06      | -1.06       | 1.57       | 1.17         | 2.02       | 1.51         | 1.40       | 1.29         |
| RHOF         | ras homolog family membe        | chr12q24.31          | GTP catabolic process                      | ---                                         | -1.02         | -1.02           | 1.02      | -1.06       | 1.06      | -1.06       | 1.30       | 1.08         | 1.79       | 1.26         | 1.30       | 1.22         |
| RHOF         | ras homolog family membe        | chr12q24.31          | GTP catabolic process                      | ---                                         | -1.09         | -1.21           | -1.04     | 1.01        | 1.06      | -1.09       | 1.35       | 1.01         | 1.75       | 1.31         | 1.30       | 1.12         |
| RHOQ         | ras homolog family membe        | chr2p21              | GTP catabolic process                      | ---                                         | -1.05         | -1.04           | 1.04      | 1.12        | -1.06     | 1.08        | -1.06      | 1.15         | -1.60      | -1.37        | -1.18      | -1.01        |
| RHOQ         | ras homolog family membe        | chr2p21              | GTP catabolic process                      | ---                                         | 1.30          | 1.68            | -1.08     | -1.29       | 1.25      | 1.25        | -1.30      | -1.05        | -1.57      | -1.37        | -1.55      | -2.18        |
| RHOQ         | ras homolog family membe        | chr2p21              | GTP catabolic process                      | ---                                         | -1.01         | 1.00            | 1.06      | -1.04       | -1.03     | 1.00        | -1.05      | -1.06        | -1.26      | -1.14        | -1.39      | -1.40        |
| RHOT1        | ras homolog family membe        | chr17q11.2           | GTP catabolic process                      | ---                                         | 1.09          | -1.02           | 1.01      | 1.05        | -1.06     | 1.13        | 1.05       | 1.19         | 1.17       | 1.32         | 1.03       | 1.04         |
| RHOT1        | ras homolog family membe        | chr17q11.2           | GTP catabolic process                      | ---                                         | 1.07          | -1.03           | 1.05      | 1.04        | 1.03      | 1.02        | 1.13       | 1.11         | 1.13       | 1.23         | 1.10       | 1.10         |
| RHOU         | ras homolog family membe        | chr1q42.11-q42.3     | G1                                         | ---                                         | 1.13          | -1.04           | 1.02      | 1.01        | -1.24     | -1.16       | -1.06      | -1.18        | -2.08      | -1.53        | -1.36      | -1.26        |
| RHOV         | ras homolog family membe        | chr15q13.3           | GTP catabolic process                      | ---                                         | 1.11          | -1.05           | 1.01      | 1.32        | -1.04     | -1.12       | 1.16       | 1.06         | 1.93       | 1.59         | 1.93       | 2.28         |
| RHPN1        | rhophilin, Rho GTPase bin       | chr8q24.3            | signal transduction                        | ---                                         | -1.14         | -1.17           | -1.32     | -1.03       | -1.30     | -1.31       | 1.17       | 1.36         | 1.07       | 1.10         | -1.75      | -1.32        |
| RHPN1        | rhophilin, Rho GTPase bin       | chr8q24.3            | signal transduction                        | ---                                         | 1.11          | -1.43           | 1.09      | 1.48        | -1.32     | -1.05       | -1.01      | 1.05         | -1.15      | -1.40        | -1.66      | -1.48        |
| RHPN2        | rhophilin, Rho GTPase bin       | chr19q13.11          | signal transduction                        | G13_Signaling_Pathway // GenMAPP            | 1.14          | 1.35            | -1.05     | 1.40        | -1.04     | 1.11        | 1.05       | 1.15         | 1.12       | 1.25         | 1.07       | 1.18         |
| RIBC1        | RIB43A domain with coile        | chrXp11.22           | 0                                          | ---                                         | 1.11          | -1.64           | 1.66      | -3.07       | 1.40      | 1.13        | -1.09      | -1.09        | -1.61      | -1.30        | -2.58      | -1.37        |
| RFI1         | RAP1 interacting factor ho      | chr2q23.3            | telomere maintenance                       | ---                                         | 1.01          | 1.12            | -1.05     | 1.10        | -1.02     | 1.10        | -1.01      | -1.00        | -1.52      | -1.42        | -1.04      | -1.26        |
| RFI1         | RAP1 interacting factor ho      | chr2q23.3            | telomere maintenance                       | ---                                         | 1.01          | 1.11            | -1.01     | 1.03        | 1.05      | -1.03       | -1.10      | -1.08        | -1.80      | -1.43        | -1.08      | -1.21        |
| RFI1         | RAP1 interacting factor ho      | chr2q23.3            | telomere maintenance                       | ---                                         | -1.09         | -1.06           | 1.05      | -1.01       | 1.07      | 1.01        | 1.12       | 1.09         | -1.32      | -1.07        | -1.08      | 1.04         |
| RFI1         | RAP1 interacting factor ho      | chr2q23.3            | telomere maintenance                       | ---                                         | -1.02         | -1.03           | -1.66     | -1.20       | 1.42      | 1.63        | -1.05      | -1.30        | -1.65      | -1.53        | -2.44      | -1.94        |

| ID         | Gene Title                  | Chromosomal Location | 1st Gene Ontology Biological Process      | Pathway                                | A2497 30 mins | A2497P' 30 mins | A2497 2 h | A2497P' 2 h | A2497 4 h | A2497P' 4 h | A2497 24 h | A2497P' 24 h | A2497 48 h | A2497P' 48 h | A2497 72 h | A2497P' 72 h |
|------------|-----------------------------|----------------------|-------------------------------------------|----------------------------------------|---------------|-----------------|-----------|-------------|-----------|-------------|------------|--------------|------------|--------------|------------|--------------|
| RILP1.2    | Rab interacting lysosomal   | chr12q24.31          | 0                                         | ---                                    | 1.13          | 1.17            | -1.05     | -1.08       | 1.09      | -1.02       | 1.07       | 1.10         | 1.19       | 1.01         | 1.19       | 1.24         |
| RIMBP2     | RIMS binding protein 2      | chr12q24.33          | negative regulation of phosphatase activi | ---                                    | 3.17          | -1.51           | 1.32      | 1.13        | 2.86      | 3.38        | -2.25      | -6.11        | 1.97       | 1.60         | 1.22       | 1.95         |
| RIMKLA     | ribosomal modification pro  | chr1p34.2            | cellular protein modification process     | ---                                    | -1.10         | -1.05           | 1.14      | 1.23        | 1.14      | 1.26        | 1.50       | 1.27         | 3.07       | 2.95         | 1.99       | 2.68         |
| RIMKLA     | ribosomal modification pro  | chr1p34.2            | cellular protein modification process     | ---                                    | 10.91         | 3.17            | -1.18     | 1.60        | -1.08     | 3.00        | -1.47      | 2.87         | -3.52      | 4.94         | -1.62      | 2.10         |
| RIMKLA     | ribosomal modification pro  | chr1p34.2            | cellular protein modification process     | ---                                    | -2.08         | -1.22           | -1.18     | 1.13        | 1.25      | -1.65       | -1.04      | -1.22        | 2.35       | 2.06         | 1.40       | 1.36         |
| RIMKLB     | ribosomal modification pro  | chr12p13.31          | cellular protein modification process     | ---                                    | 1.07          | -1.01           | 1.09      | 1.02        | -1.01     | -1.03       | 1.46       | 1.21         | -2.12      | -2.29        | -2.72      | -3.77        |
| RIMKLB     | ribosomal modification pro  | chr12p13.31          | cellular protein modification process     | ---                                    | 1.54          | 3.23            | 1.23      | 1.24        | -2.68     | 1.01        | -1.50      | -1.37        | -2.08      | -3.53        | -3.49      | -1.96        |
| RIMKLB     | ribosomal modification pro  | chr12p13.31          | cellular protein modification process     | ---                                    | -1.11         | -1.03           | 1.12      | 1.22        | 1.12      | 1.03        | 1.11       | -1.05        | 1.69       | 1.59         | 1.59       | 1.62         |
| RIMKLB     | ribosomal modification pro  | chr12p13.31          | cellular protein modification process     | ---                                    | 1.35          | 1.31            | 1.20      | -1.05       | 1.00      | 1.01        | 1.31       | 1.21         | -1.34      | -1.91        | -1.48      | -2.20        |
| RIMS2      | regulating synaptic membra  | chr8q22.3            | intracellular protein transport           | ---                                    | -1.12         | -2.36           | 2.26      | -3.29       | -1.02     | -3.01       | 1.04       | -2.84        | -2.94      | -5.03        | 3.90       | 4.68         |
| RIMS3      | regulating synaptic membra  | chr1pter-p22.2       | transport                                 | ---                                    | 1.15          | 1.26            | 1.76      | 1.76        | 2.17      | 2.40        | -1.96      | -1.67        | 2.28       | 2.99         | 1.19       | -1.01        |
| RIN1       | Ras and Rab interactor 1    | chr11q13.2           | endocytosis                               | ---                                    | 1.14          | 1.16            | 1.22      | 1.37        | 1.11      | -1.11       | 1.62       | 1.37         | 2.01       | 1.34         | 1.77       | 1.78         |
| RIN2       | Ras and Rab interactor 2    | chr20p11.22          | endocytosis                               | ---                                    | 1.08          | 1.08            | -1.03     | -1.08       | -1.12     | 1.01        | -1.09      | 1.01         | -1.66      | -1.42        | -1.57      | -1.62        |
| RINT1      | RAD50 interactor 1          | chr7q22.3            | transport                                 | ---                                    | -1.09         | -1.08           | -1.03     | -1.03       | 1.03      | -1.05       | -1.05      | -1.17        | -1.26      | -1.14        | 1.37       | 1.32         |
| RIOK1      | RIO kinase 1                | chr6p24.3            | protein phosphorylation                   | ---                                    | -1.17         | -1.04           | 1.03      | 1.04        | 1.06      | -1.07       | 1.10       | 1.10         | 1.34       | 1.16         | 1.55       | 1.32         |
| RIOK2      | RIO kinase 2                | chr5q15              | protein phosphorylation                   | ---                                    | 1.02          | -1.05           | 1.00      | 1.05        | -1.16     | 1.02        | -1.56      | -1.28        | -2.43      | -2.55        | -2.40      | -2.47        |
| RIOK2      | RIO kinase 2                | chr5q15              | protein phosphorylation                   | ---                                    | 1.03          | 1.03            | 1.07      | 1.10        | 1.04      | -1.01       | 1.11       | 1.04         | 1.20       | -1.04        | 1.33       | 1.30         |
| RIOK3      | RIO kinase 3                | chr18q11.2           | protein phosphorylation                   | ---                                    | -1.16         | -1.17           | 1.03      | 1.10        | 1.08      | -1.04       | 1.04       | 1.08         | 2.10       | 1.62         | 2.39       | 1.92         |
| RIOK3      | RIO kinase 3                | chr18q11.2           | protein phosphorylation                   | ---                                    | 1.16          | 1.23            | 1.00      | -1.04       | -1.10     | -1.01       | -1.02      | -1.03        | 1.08       | 1.18         | 1.42       | 1.21         |
| RIOK3      | RIO kinase 3                | chr18q11.2           | protein phosphorylation                   | ---                                    | -1.13         | -1.04           | 1.14      | -1.16       | 1.19      | 1.09        | 1.03       | 1.24         | -2.78      | -2.20        | -1.49      | 1.42         |
| RIOK3      | RIO kinase 3                | chr18q11.2           | protein phosphorylation                   | ---                                    | 1.12          | -1.03           | 1.25      | -1.17       | 1.03      | -1.01       | 1.10       | 1.26         | 1.04       | 1.51         | 1.55       | 1.25         |
| RIPK1      | receptor (TNFRSF)-interac   | chr6p25.2            | positive regulation of protein phosphoryl | Apoptosis // GenMAPP // Apoptosis_GenM | -1.09         | -1.36           | -1.05     | -1.19       | 1.06      | 1.04        | 1.00       | -1.49        | 1.49       | 1.27         | 2.05       | 1.89         |
| RIPK1      | receptor (TNFRSF)-interac   | chr6p25.2            | positive regulation of protein phosphoryl | Apoptosis // GenMAPP // Apoptosis_GenM | 1.03          | -1.01           | -1.01     | 1.04        | 1.12      | 1.07        | -1.28      | -1.07        | -1.21      | -1.49        | -1.04      | 1.06         |
| RIPK2      | receptor-interacting serine | chr8q21              | activation of MAPK activity               | ---                                    | -1.08         | -1.07           | 1.06      | 1.12        | 1.06      | -1.07       | 1.41       | 1.21         | 1.68       | 1.33         | 1.61       | 1.47         |
| RIPK4      | receptor-interacting serine | chr21q22.3           | morphogenesis of an epithelium            | ---                                    | -1.08         | -1.31           | -1.30     | -1.13       | 1.09      | -1.05       | 1.25       | 1.09         | 1.31       | 1.27         | 2.77       | 2.53         |
| RIPPLY3    | rippyly3 homolog (zebrafish | chr21q22.2           | negative regulation of transcription from | ---                                    | 1.19          | -1.07           | 2.21      | 2.07        | -1.59     | 1.01        | -1.52      | -1.00        | -1.89      | -1.33        | -1.41      | -2.51        |
| RTT1       | Ras-like without CAAX 1     | chr1q22              | GTP catabolic process                     | ---                                    | 1.16          | 1.18            | 1.20      | 1.14        | 1.10      | 1.24        | -1.05      | 1.10         | 1.18       | 1.54         | 1.35       | 1.17         |
| RTT1       | Ras-like without CAAX 1     | chr1q22              | signal transduction                       | ---                                    | 1.17          | 1.13            | 1.16      | 1.11        | 1.08      | 1.14        | -1.15      | -1.24        | 1.15       | 1.52         | 1.20       | 1.07         |
| RTT1       | Ras-like without CAAX 1     | chr1q22              | GTP catabolic process                     | ---                                    | -1.16         | -1.14           | -1.09     | -1.15       | 1.10      | 1.05        | 1.35       | 1.08         | 2.49       | 2.37         | 2.79       | 2.47         |
| RTT1       | Ras-like without CAAX 1     | chr1q22              | signal transduction                       | ---                                    | 1.12          | 1.18            | 1.10      | 1.02        | 1.29      | 1.25        | -1.15      | 1.02         | -1.17      | 1.37         | 1.36       | 1.21         |
| RTT1       | Ras-like without CAAX 1     | chr1q22              | GTP catabolic process                     | ---                                    | -1.15         | 1.03            | 1.13      | -1.24       | -1.08     | -1.03       | 1.20       | 1.09         | 1.07       | 1.11         | 1.63       | 1.50         |
| RLF        | rearranged L-myc fusion     | chr1p32              | transcription, DNA-dependent              | ---                                    | -1.31         | -1.04           | -1.01     | -1.23       | 1.04      | -1.08       | 1.09       | 1.21         | 1.14       | 1.14         | 2.13       | 2.03         |
| RLIM       | ring finger protein, LIM do | chrXq13-q21          | negative regulation of transcription from | ---                                    | -1.01         | -1.07           | -1.04     | 1.05        | -1.01     | 1.11        | -1.11      | 1.13         | 1.36       | 1.50         | 1.73       | 1.75         |
| RLN1       | relaxin 1                   | chr9p24.1            | signal transduction                       | Smooth_muscle_contraction // GenMAPP   | 12.21         | 5.59            | 1.02      | -1.36       | -1.71     | -2.20       | 1.38       | 1.88         | -5.08      | -1.88        | -1.12      | -1.59        |
| RLN2       | relaxin 2                   | chr9p24.1            | female pregnancy                          | ---                                    | -1.32         | 1.34            | 1.35      | 2.07        | -1.49     | 1.14        | 1.11       | -1.12        | 1.07       | 1.00         | -3.97      | -4.18        |
| RLN3       | relaxin 3                   | chr19p13.2           | 0                                         | ---                                    | -1.92         | -3.09           | 3.54      | 2.90        | -3.40     | 1.05        | 1.30       | 1.54         | 1.27       | 1.92         | -1.35      | -2.08        |
| RMDN1      | regulator of microtubule dy | chr8q21.3            | 0                                         | ---                                    | 1.09          | 1.06            | -1.01     | 1.03        | -1.03     | -1.00       | -1.03      | -1.12        | -1.48      | -1.40        | -1.69      | -1.62        |
| RMDN1      | regulator of microtubule dy | chr8q21.3            | 0                                         | ---                                    | 2.11          | 1.82            | -1.15     | 1.03        | 1.44      | 1.24        | 1.03       | -1.06        | -1.70      | -1.49        | -1.88      | -1.83        |
| RMDN3      | regulator of microtubule dy | chr15q15.1           | cellular calcium ion homeostasis          | ---                                    | -1.09         | -1.10           | 1.05      | 1.03        | 1.08      | 1.03        | 1.10       | 1.11         | -1.08      | -1.06        | -1.28      | -1.03        |
| RMI1       | RecQ mediated genome ins    | chr9q21.32           | DNA replication                           | ---                                    | 1.16          | 1.27            | 1.09      | -1.05       | 1.08      | 1.09        | -1.26      | -1.15        | -1.70      | -1.52        | -1.27      | -1.60        |
| RMI2       | RecQ mediated genome ins    | chr16p13.13          | DNA replication                           | ---                                    | -1.04         | -1.00           | 1.08      | -1.06       | 1.02      | -1.05       | -1.04      | 1.00         | -1.58      | -1.30        | -1.51      | -1.54        |
| RMND1      | required for meiotic nuclea | chr6q25.1            | translation                               | ---                                    | 1.00          | -1.11           | 1.09      | 1.20        | -1.11     | -1.02       | 1.18       | 1.05         | -2.01      | -1.80        | -2.01      | -1.72        |
| RMND1      | required for meiotic nuclea | chr6q25.1            | translation                               | ---                                    | 1.09          | 1.06            | -1.12     | -1.25       | -1.02     | 1.01        | -1.00      | -1.31        | -2.44      | -1.88        | -1.38      | -1.49        |
| RMND5A     | required for meiotic nuclea | chr2p11.2            | 0                                         | ---                                    | 1.27          | 1.27            | 1.22      | 1.19        | 1.23      | 1.35        | 1.21       | 1.07         | 1.11       | 1.04         | 1.37       | 1.02         |
| RMND5A     | required for meiotic nuclea | chr2p11.2            | 0                                         | ---                                    | 1.01          | 1.02            | -1.02     | -1.05       | -1.10     | -1.01       | -1.28      | -1.16        | -1.34      | -1.16        | -1.17      | -1.32        |
| RMND5B     | required for meiotic nuclea | chr5q35.3            | 0                                         | ---                                    | -1.02         | -1.04           | 1.00      | -1.01       | 1.06      | 1.01        | 1.16       | -1.05        | 1.09       | -1.13        | -1.35      | -1.26        |
| RMST       | rhabdomyosarcoma 2 assoc    | chr12q23.11 2q21     | 0                                         | ---                                    | 2.91          | -2.03           | -1.63     | -1.62       | -2.09     | 1.62        | -1.64      | -1.46        | 4.77       | 7.42         | 1.27       | -1.29        |
| RNA45S5    | RNA, 45S pre-ribosomal S    | ---                  | 0                                         | ---                                    | -1.01         | -1.14           | 1.04      | -1.82       | 1.23      | 1.07        | 1.54       | 1.24         | -2.23      | -2.36        | -4.40      | -4.24        |
| RNA45S5    | RNA, 45S pre-ribosomal S    | ---                  | 0                                         | ---                                    | 1.06          | -1.01           | 1.05      | -1.57       | 1.69      | 1.17        | 1.80       | 1.25         | -2.09      | -2.65        | -4.05      | -4.43        |
| RNASE4     | ribonuclease, RNase A fam   | chr14q11             | mRNA cleavage                             | mRNA_processing_Reactome // GenMAPP    | 1.10          | -1.02           | -1.01     | 1.02        | 1.04      | 1.09        | 1.11       | -1.02        | -1.04      | 1.27         | 1.21       | 1.38         |
| RNASEH1    | ribonuclease H1             | chr2p25              | mitochondrial DNA replication             | ---                                    | -1.08         | -1.05           | -1.03     | 1.05        | 1.11      | 1.06        | 1.15       | 1.10         | 1.28       | 1.12         | 1.33       | 1.36         |
| RNASEH2B   | ribonuclease H2, subunit B  | chr13q14.3           | RNA catabolic process                     | ---                                    | -1.19         | 1.04            | 1.28      | -1.01       | 1.46      | 1.10        | -1.40      | -1.47        | -1.53      | -1.09        | -1.51      | -4.49        |
| RNASEH2B   | ribonuclease H2, subunit B  | chr13q14.3           | RNA catabolic process                     | ---                                    | -1.07         | -1.06           | -1.03     | -1.03       | -1.23     | -1.24       | 1.14       | -1.01        | -2.18      | -1.45        | -1.86      | -1.73        |
| RNASEH2B   | ribonuclease H2, subunit B  | chr13q14.3           | RNA catabolic process                     | ---                                    | -1.10         | -1.07           | -1.05     | 1.10        | -1.04     | 1.12        | -1.22      | 1.03         | -1.27      | -1.45        | -2.23      | -2.03        |
| RNASEH2B   | ribonuclease H2, subunit B  | chr13q14.3           | RNA catabolic process                     | ---                                    | -1.08         | -1.07           | 1.22      | -1.04       | 1.26      | 1.31        | -1.19      | -1.16        | -1.75      | -1.67        | -1.36      | -1.66        |
| RNASEH2C   | ribonuclease H2, subunit C  | chr11q13.1           | RNA catabolic process                     | ---                                    | -1.12         | -1.11           | 1.05      | 1.09        | -1.04     | -1.18       | 1.16       | 1.15         | 1.06       | -1.04        | -1.63      | -1.59        |
| RNASEH2C   | ribonuclease H2, subunit C  | chr11q13.1           | RNA catabolic process                     | ---                                    | 1.02          | -1.14           | 1.00      | 1.18        | -1.02     | -1.06       | 1.08       | 1.18         | -1.12      | -1.17        | -1.67      | -1.46        |
| RNASEK /// | ribonuclease, RNase K ///   | chr17p /// chr17p13  | mRNA processing                           | ---                                    | -1.06         | -1.00           | -1.04     | 1.02        | 1.02      | -1.06       | 1.14       | 1.07         | 1.49       | 1.23         | 1.21       | 1.18         |
| RNASEL     | ribonuclease L (2',5'-oligo | chr1q25              | mRNA processing                           | ---                                    | 1.06          | 1.02            | 1.27      | 1.41        | 1.20      | -1.03       | -1.27      | -1.03        | -1.00      | -1.27        | 1.00       | 1.19         |
| RNASET2    | ribonuclease T2             | chr6q27              | RNA catabolic process                     | ---                                    | 1.02          | -1.14           | -1.05     | 1.18        | 1.01      | 1.05        | 1.08       | 1.18         | 1.33       | 1.20         | 1.03       | 1.34         |
| RNASET2    | ribonuclease T2             | chr6q27              | RNA catabolic process                     | ---                                    | 1.69          | 2.51            | 1.10      | 1.31        | 1.24      | -1.27       | 1.63       | 1.54         | 1.77       | 1.69         | 1.53       | -1.05        |
| RND3       | Rho family GTPase 3         | chr2q23.3            | GTP catabolic process                     | ---                                    | 1.30          | 1.31            | -1.03     | -1.02       | -1.04     | -1.02       | 1.08       | -1.02        | 1.40       | 1.15         | 2.73       | 1.76         |
| RNF10      | ring finger protein 10      | chr12q24.31          | transcription, DNA-dependent              | ---                                    | 1.11          | 1.03            | -1.11     | -1.11       | -1.08     | 1.04        | -1.09      | -1.11        | -1.14      | 1.03         | -1.12      | -1.05        |
| RNF103     | ring finger protein 103     | chr2p11.2            | central nervous system development        | ---                                    | 1.12          | 1.11            | 1.15      | 1.10        | 1.17      | 1.13        | -1.12      | -1.13        | -1.53      | -1.31        | 1.03       | -1.07        |
| RNF112     | ring finger protein 112     | chr17p11.2           | GTP catabolic process                     | ---                                    | -1.32         | -2.36           | 1.01      | 1.19        | -1.94     | -1.08       | 2.27       | 1.20         | 2.68       | 4.12         | -1.48      | 1.73         |
| RNF113A    | ring finger protein 113A    | chrXq25-q26          | 0                                         | Electron_Transport_Chain // GenMAPP    | -1.07         | -1.06           | 1.01      | -1.00       | 1.05      | -1.06       | -1.03      | -1.05        | -1.03      | 1.14         | 1.20       | 1.31         |

| ID      | Gene Title                   | Chromosomal Location | 1st Gene Ontology Biological Process       | Pathway | A2497 30 mins | A2497P' 30 mins | A2497 2 h | A2497P' 2 h | A2497 4 h | A2497P' 4 h | A2497 24 h | A2497P' 24 h | A2497 48 h | A2497P' 48 h | A2497 72 h | A2497P' 72 h |
|---------|------------------------------|----------------------|--------------------------------------------|---------|---------------|-----------------|-----------|-------------|-----------|-------------|------------|--------------|------------|--------------|------------|--------------|
| RNF114  | ring finger protein 114      | chr20q13.13          | multicellular organismal development       | ---     | 1.01          | 1.02            | -1.04     | -1.03       | 1.08      | 1.05        | 1.07       | -1.01        | 1.02       | -1.06        | 1.16       | 1.21         |
| RNF114  | ring finger protein 114      | chr20q13.13          | multicellular organismal development       | ---     | -1.08         | -1.07           | -1.01     | -1.07       | 1.19      | -1.04       | 1.22       | 1.20         | 1.76       | -1.57        | 2.13       | 2.31         |
| RNF121  | ring finger protein 121      | chr11q13.4           | 0                                          | ---     | -1.17         | -1.15           | 1.06      | 1.11        | 1.10      | 1.02        | 1.11       | 1.08         | -1.40      | -1.50        | -1.44      | -1.23        |
| RNF125  | ring finger protein 125, E3  | chr18q12.1           | protein ubiquitination                     | ---     | 1.16          | 1.26            | 1.04      | 1.27        | 1.39      | 1.30        | -1.06      | -1.07        | 1.10       | -1.07        | 1.37       | 1.08         |
| RNF125  | ring finger protein 125, E3  | chr18q12.1           | protein ubiquitination                     | ---     | 1.76          | 1.17            | -1.20     | -2.08       | 1.61      | 1.41        | -1.30      | 1.14         | 1.16       | 1.42         | 2.25       | 1.77         |
| RNF126  | ring finger protein 126      | chr19p13.3           | 0                                          | ---     | 1.09          | 1.10            | 1.02      | -1.20       | -1.24     | -1.16       | 1.34       | 1.24         | 1.40       | 1.23         | 1.20       | 1.17         |
| RNF126  | ring finger protein 126      | chr19p13.3           | 0                                          | ---     | -1.04         | -1.02           | -1.14     | 1.17        | 1.01      | 1.22        | 1.00       | -1.08        | 1.11       | -1.16        | 1.40       | 1.51         |
| RNF13   | ring finger protein 13       | chr3q25.1            | protein ubiquitination                     | ---     | 1.03          | -1.06           | -1.05     | 1.00        | 1.00      | 1.17        | -1.12      | 1.05         | -1.60      | -1.40        | -1.21      | -1.37        |
| RNF130  | ring finger protein 130      | chr5q35.3            | apoptotic process                          | ---     | 1.01          | -1.01           | 1.05      | -1.06       | 1.07      | -1.02       | 1.00       | -1.03        | -1.47      | -1.27        | -1.89      | -1.88        |
| RNF14   | ring finger protein 14       | chr5q23.3-q31.1      | transcription, DNA-dependent               | ---     | 1.01          | -1.16           | 1.28      | 1.18        | 1.14      | 1.22        | -1.75      | -1.48        | -1.31      | -1.27        | -1.03      | 1.36         |
| RNF14   | ring finger protein 14       | chr5q23.3-q31.1      | transcription, DNA-dependent               | ---     | 1.14          | 1.14            | 1.05      | 1.06        | -1.17     | 1.05        | -1.35      | -1.19        | -1.77      | -1.71        | -1.34      | -1.63        |
| RNF141  | ring finger protein 141      | chr11p15.4           | regulation of transcription, DNA-depend    | ---     | -1.12         | -1.12           | -1.02     | -1.11       | -1.03     | 1.07        | -1.36      | -1.05        | -1.85      | -1.42        | -1.65      | -1.42        |
| RNF141  | ring finger protein 141      | chr11p15.4           | regulation of transcription, DNA-depend    | ---     | 2.24          | -1.58           | 2.99      | 2.21        | 1.79      | 2.52        | -3.70      | 1.19         | -4.34      | -1.86        | 1.40       | 3.03         |
| RNF144B | ring finger protein 144B     | chr6p22.3            | apoptotic process                          | ---     | -1.14         | -1.12           | 1.16      | 1.07        | 1.06      | 1.22        | -1.19      | -1.05        | 1.58       | 1.37         | 1.77       | 1.31         |
| RNF144B | ring finger protein 144B     | chr6p22.3            | apoptotic process                          | ---     | -2.89         | -2.34           | -1.19     | -1.05       | -1.59     | 1.02        | -1.05      | -1.72        | -1.20      | 1.72         | 5.73       | 1.56         |
| RNF145  | ring finger protein 145      | chr5q33.3            | 0                                          | ---     | -1.20         | -1.35           | -1.20     | -1.25       | -1.16     | -1.06       | 1.28       | 1.09         | 1.57       | 1.19         | 1.25       | 1.26         |
| RNF146  | ring finger protein 146      | chr6p22.1-q22.33     | Wnt receptor signaling pathway             | ---     | -1.07         | -1.04           | 1.09      | 1.02        | -1.15     | -1.09       | -1.20      | -1.04        | -1.19      | -1.29        | 1.33       | 1.13         |
| RNF149  | ring finger protein 149      | chr2q11.2            | protein ubiquitination                     | ---     | 1.11          | 1.12            | -1.07     | -1.06       | -1.26     | -1.09       | 1.06       | -1.08        | -1.27      | -1.23        | -1.05      | -1.28        |
| RNF150  | ring finger protein 150      | chr4q31.21           | 0                                          | ---     | -1.10         | -1.15           | 1.12      | -1.01       | 1.07      | -1.03       | -1.12      | -1.08        | -1.76      | -1.50        | -1.60      | -1.40        |
| RNF157  | ring finger protein 157      | chr17q25.1           | 0                                          | ---     | -1.17         | -1.01           | -1.50     | -1.04       | -1.15     | -1.17       | -1.10      | 1.02         | -1.79      | -1.37        | -1.46      | -1.31        |
| RNF165  | ring finger protein 165      | chr18q21.1           | 0                                          | ---     | -1.34         | 1.12            | -1.05     | -1.07       | 1.19      | 1.65        | 1.14       | -1.03        | 1.09       | 1.37         | 1.46       | 1.50         |
| RNF165  | ring finger protein 165      | chr18q21.1           | 0                                          | ---     | 1.11          | 1.48            | 1.13      | -1.18       | -1.23     | -1.06       | 1.06       | -1.01        | 1.79       | 1.38         | 1.80       | 1.34         |
| RNF165  | ring finger protein 165      | chr18q21.1           | 0                                          | ---     | 1.05          | 1.02            | 1.02      | 1.19        | 1.01      | 1.02        | 1.24       | 1.27         | 1.39       | 1.24         | 1.64       | 1.58         |
| RNF167  | ring finger protein 167      | chr17p13.2           | protein polyubiquitination                 | ---     | -1.07         | -1.16           | -1.01     | 1.07        | -1.05     | 1.19        | -1.19      | -1.11        | 1.20       | 1.34         | 1.15       | 1.35         |
| RNF168  | ring finger protein 168, E3  | chr3q29              | DNA repair                                 | ---     | -1.04         | -1.29           | 1.44      | 1.44        | -1.46     | -1.35       | -1.50      | 1.14         | 1.29       | 1.10         | 1.46       | 1.73         |
| RNF168  | ring finger protein 168, E3  | chr3q29              | DNA repair                                 | ---     | 1.04          | 1.01            | 1.01      | 1.06        | -1.05     | 1.03        | -1.18      | -1.21        | 1.12       | 1.16         | 1.32       | 1.36         |
| RNF169  | ring finger protein 169      | chr11q13.4           | response to DNA damage stimulus            | ---     | 1.03          | 1.01            | -1.01     | 1.06        | -1.05     | 1.03        | 1.33       | 1.12         | 1.28       | 1.17         | 1.56       | 1.42         |
| RNF170  | ring finger protein 170      | chr8p11.21           | protein ubiquitination                     | ---     | -1.01         | -1.09           | 1.06      | 1.02        | 1.21      | 1.03        | -1.14      | 1.03         | -1.44      | -1.44        | -1.59      | -1.41        |
| RNF170  | ring finger protein 170      | chr8p11.21           | protein ubiquitination                     | ---     | 1.13          | 1.15            | -1.07     | -1.22       | 1.07      | 1.02        | 1.11       | 1.05         | -1.79      | -1.50        | -1.70      | -2.02        |
| RNF180  | ring finger protein 180      | chr5q12.3            | protein ubiquitination                     | ---     | 6.98          | 11.73           | -1.59     | -1.25       | 6.56      | 6.96        | -1.43      | -1.39        | -1.16      | -2.00        | 1.61       | 2.05         |
| RNF181  | ring finger protein 181      | chr2p11.2            | protein ubiquitination                     | ---     | -1.04         | -1.02           | -1.01     | -1.02       | 1.05      | -1.11       | 1.27       | 1.15         | 1.24       | 1.22         | 1.26       | 1.27         |
| RNF182  | ring finger protein 182      | chr6p23              | protein ubiquitination                     | ---     | 1.20          | 1.22            | -1.03     | -1.04       | -1.14     | 1.02        | -1.08      | -1.22        | -1.05      | -1.01        | -1.66      | -1.96        |
| RNF19B  | ring finger protein 19B      | chr1p35.1            | protein ubiquitination                     | ---     | 1.20          | 1.22            | -1.09     | -1.15       | -1.00     | -1.01       | 1.05       | -1.14        | 2.01       | 1.45         | 2.41       | 1.85         |
| RNF19B  | ring finger protein 19B      | chr1p35.1            | protein ubiquitination                     | ---     | 1.35          | 1.00            | -1.16     | -1.18       | 1.16      | 1.02        | 1.13       | 1.04         | 1.89       | 1.46         | 2.32       | 1.84         |
| RNF2    | ring finger protein 2        | chr1q25.3            | negative regulation of transcription from  | ---     | 1.26          | 1.27            | 1.26      | 1.03        | -1.15     | -1.02       | -1.50      | -1.12        | 1.29       | 1.03         | 1.09       | 1.01         |
| RNF20   | ring finger protein 20, E3 u | chr9q22              | protein polyubiquitination                 | ---     | 1.03          | 1.00            | -1.03     | 1.13        | 1.04      | 1.11        | -1.15      | -1.10        | -1.54      | -1.29        | -1.31      | -1.33        |
| RNF207  | ring finger protein 207      | chr1p36.31           | 0                                          | ---     | -1.15         | -1.14           | -1.04     | -1.02       | -1.04     | -1.11       | 1.11       | 1.03         | -1.01      | -1.13        | -1.22      | -1.08        |
| RNF207  | ring finger protein 207      | chr1p36.31           | 0                                          | ---     | 1.08          | -1.03           | 1.06      | 1.18        | 1.16      | 1.07        | 1.19       | 1.18         | -1.82      | -1.99        | -1.89      | -1.90        |
| RNF212  | ring finger protein 212      | chr4p16.3            | meiotic gene conversion                    | ---     | 1.09          | -1.02           | -1.08     | 1.03        | -1.00     | -1.10       | 1.15       | 1.02         | 1.17       | 1.14         | 1.24       | 1.42         |
| RNF213  | ring finger protein 213      | chr17q25.3           | ATP catabolic process                      | ---     | -1.05         | -1.05           | 1.25      | 1.32        | 1.29      | 1.05        | -1.12      | -1.25        | -1.52      | -1.32        | -2.57      | -3.72        |
| RNF213  | ring finger protein 213      | chr17q25.3           | ATP catabolic process                      | ---     | -1.08         | -1.12           | -1.17     | -1.35       | -1.07     | -1.22       | 1.18       | 1.15         | -1.07      | -1.24        | 1.02       | 1.13         |
| RNF213  | ring finger protein 213      | chr17q25.3           | ATP catabolic process                      | ---     | 1.02          | 1.05            | 1.00      | -1.06       | 1.12      | 1.08        | -1.03      | -1.13        | -1.22      | -1.23        | -1.20      | -1.34        |
| RNF213  | ring finger protein 213      | chr17q25.3           | ATP catabolic process                      | ---     | 1.07          | 1.11            | 1.01      | -1.10       | 1.06      | 1.01        | -1.16      | -1.09        | -1.46      | -1.17        | -1.17      | -1.21        |
| RNF213  | ring finger protein 213      | chr17q25.3           | ATP catabolic process                      | ---     | 1.03          | 1.05            | 1.05      | 1.01        | 1.01      | -1.08       | 1.02       | 1.04         | -1.11      | 1.02         | -1.72      | -1.25        |
| RNF216  | ring finger protein 216      | chr7p22.1            | apoptotic process                          | ---     | -1.14         | -1.24           | -1.08     | 1.03        | 1.07      | -1.07       | 1.10       | 1.09         | 1.72       | 1.38         | 1.89       | 1.72         |
| RNF220  | ring finger protein 220      | chr1p34.1            | protein ubiquitination                     | ---     | -1.01         | -1.06           | 1.01      | 1.04        | -1.06     | 1.04        | 1.06       | 1.08         | -1.20      | -1.24        | -1.08      | -1.03        |
| RNF24   | ring finger protein 24       | chr20p13             | 0                                          | ---     | 1.01          | -1.09           | -1.12     | -1.22       | -1.06     | -1.05       | 1.33       | 1.22         | 1.05       | 1.17         | 1.14       | 1.33         |
| RNF24   | ring finger protein 24       | chr20p13             | 0                                          | ---     | 1.01          | -1.02           | 1.13      | 1.06        | -1.00     | -1.03       | -1.02      | -1.09        | 1.31       | 1.33         | 1.28       | 1.44         |
| RNF25   | ring finger protein 25       | chr2q35              | protein ubiquitination                     | ---     | -1.26         | -1.23           | 1.00      | 1.03        | 1.01      | -1.10       | 1.10       | 1.14         | 1.32       | 1.14         | 1.33       | 1.39         |
| RNF26   | ring finger protein 26       | chr11q23             | 0                                          | ---     | 1.23          | -1.13           | -1.37     | -1.39       | -1.18     | -1.09       | -1.20      | -1.29        | 1.45       | 1.59         | 1.25       | 1.57         |
| RNF26   | ring finger protein 26       | chr11q23             | 0                                          | ---     | 1.11          | -1.06           | 1.15      | 1.26        | 1.02      | 1.13        | -1.04      | 1.08         | 1.19       | 1.19         | 1.12       | 1.39         |
| RNF32   | ring finger protein 32       | chr7q36              | 0                                          | ---     | 1.24          | -1.03           | 1.04      | 1.80        | 1.01      | 1.32        | -2.49      | -2.29        | 1.30       | 1.17         | 1.37       | 1.24         |
| RNF34   | ring finger protein 34, E3 u | chr12q24.31          | apoptotic process                          | ---     | 1.01          | 1.04            | 1.15      | 1.14        | 1.02      | 1.04        | 1.07       | 1.12         | 1.02       | 1.04         | 1.21       | 1.38         |
| RNF34   | ring finger protein 34, E3 u | chr12q24.31          | apoptotic process                          | ---     | -1.07         | -1.06           | 1.12      | 1.01        | 1.05      | 1.04        | -1.13      | -1.16        | -1.21      | -1.19        | 1.07       | 1.07         |
| RNF38   | ring finger protein 38       | chr9p13              | 0                                          | ---     | -1.23         | -1.37           | 1.17      | 1.13        | -1.10     | -1.60       | 2.14       | 1.17         | 1.81       | 1.34         | 2.46       | 2.49         |
| RNF39   | ring finger protein 39       | chr6p21.3            | 0                                          | ---     | 1.12          | -1.19           | -1.11     | -1.03       | -1.23     | 1.12        | 1.18       | 1.21         | -2.90      | -1.25        | -1.37      | -1.22        |
| RNF4    | ring finger protein 4        | chr4p16.3            | transcription, DNA-dependent               | ---     | 1.01          | 1.07            | 1.03      | -1.10       | 1.12      | -1.00       | 1.08       | -1.04        | 1.02       | 1.03         | 1.36       | 1.17         |
| RNF41   | ring finger protein 41       | chr12q13.13          | protein polyubiquitination                 | ---     | -1.02         | -1.08           | 1.09      | 1.04        | -1.01     | 1.09        | 1.10       | 1.06         | 1.05       | 1.23         | 1.18       | 1.21         |
| RNF6    | ring finger protein (C3H2C   | chr13q12.2           | regulation of transcription, DNA-depend    | ---     | -1.47         | -1.33           | -1.04     | 1.75        | 2.47      | 3.80        | -1.20      | 1.98         | 8.90       | 8.17         | 2.39       | 1.76         |
| RNF7    | ring finger protein 7        | chr3q22-q24          | intrinsic apoptotic signaling pathway in r | ---     | 1.03          | 1.04            | 1.01      | 1.03        | -1.01     | -1.16       | 1.20       | 1.04         | 1.35       | 1.12         | 1.08       | 1.09         |
| RNF7    | ring finger protein 7        | chr3q22-q24          | intrinsic apoptotic signaling pathway in r | ---     | -1.02         | -1.08           | -1.02     | 1.02        | 1.01      | -1.08       | 1.23       | 1.16         | 1.28       | 1.15         | 1.08       | 1.12         |
| RNF7    | ring finger protein 7        | chr3q22-q24          | intrinsic apoptotic signaling pathway in r | ---     | 1.07          | 1.10            | 1.08      | 1.14        | 1.01      | 1.01        | 1.12       | 1.08         | 1.18       | 1.14         | 1.10       | 1.16         |
| RNFT1   | ring finger protein, transme | chr17q23.1           | 0                                          | ---     | 1.76          | 1.62            | 1.11      | 1.09        | -1.02     | -1.11       | -1.79      | -1.56        | -2.63      | -2.64        | 1.10       | -2.21        |
| RNFT2   | ring finger protein, transme | chr12q24.22          | 0                                          | ---     | -1.03         | -1.05           | -1.07     | -1.08       | 1.15      | 1.02        | -1.05      | -1.07        | -1.38      | -1.25        | -1.27      | -1.28        |
| RNFT2   | ring finger protein, transme | chr12q24.22          | 0                                          | ---     | -1.03         | -1.08           | -1.09     | -1.04       | 1.08      | -1.14       | -1.06      | 1.22         | -1.08      | -1.02        | -1.89      | -1.62        |
| RNFT2   | ring finger protein, transme | chr12q24.22          | 0                                          | ---     | -1.23         | -1.18           | -1.16     | -1.32       | -1.26     | -1.27       | 1.33       | 1.06         | 1.12       | -1.53        | -1.59      | -1.39        |

| ID                                            | Gene Title                         | Chromosomal Location | 1st Gene Ontology Biological Process          | Pathway                                  | A2497 30 mins | A2497P' 30 mins | A2497 2 h | A2497P' 2 h | A2497 4 h | A2497P' 4 h | A2497 24 h | A2497P' 24 h | A2497 48 h | A2497P' 48 h | A2497 72 h | A2497P' 72 h |
|-----------------------------------------------|------------------------------------|----------------------|-----------------------------------------------|------------------------------------------|---------------|-----------------|-----------|-------------|-----------|-------------|------------|--------------|------------|--------------|------------|--------------|
| RNGTT                                         | RNA guanylyltransferase            | chr6q16              | transcription from RNA polymerase II promoter | mRNA_processing_Reactome // GenMAPP      | -1.11         | -1.09           | 1.12      | 1.13        | 1.21      | 1.28        | 1.15       | -1.04        | 1.07       | 1.03         | 1.24       | 1.11         |
| RNGTT                                         | RNA guanylyltransferase            | chr6q16              | transcription from RNA polymerase II promoter | mRNA_processing_Reactome // GenMAPP      | -1.03         | -1.02           | 1.01      | 1.07        | 1.10      | -1.08       | -1.06      | -1.21        | 1.11       | 1.13         | 1.28       | 1.19         |
| RNGTT                                         | RNA guanylyltransferase            | chr6q16              | transcription from RNA polymerase II promoter | mRNA_processing_Reactome // GenMAPP      | -1.01         | -1.00           | -1.03     | -1.06       | 1.11      | -1.04       | -1.18      | -1.03        | -1.13      | 1.06         | 1.25       | 1.26         |
| RNH1                                          | ribonuclease/angiogenin inhibitor  | chr11p15.5           | mRNA catabolic process                        | ---                                      | -1.07         | -1.10           | -1.02     | -1.01       | 1.03      | -1.17       | 1.14       | 1.08         | 1.34       | 1.21         | 1.68       | 1.94         |
| RNLS                                          | renalase, FAD-dependent            | chr10q23.31          | oxidation-reduction process                   | ---                                      | 1.11          | 1.05            | -1.00     | -1.14       | 1.20      | -1.15       | 1.16       | 1.04         | 1.14       | 1.28         | 1.11       | 1.41         |
| RNMT                                          | RNA (guanine-7-) methyltransferase | chr18p11.21          | transcription from RNA polymerase II promoter | mRNA_processing_Reactome // GenMAPP      | 1.14          | -1.00           | -1.02     | 1.06        | -1.03     | 1.06        | 1.56       | 1.35         | -1.48      | -1.04        | -1.18      | -1.29        |
| RNMTL1                                        | RNA methyltransferase like         | chr17p13.3           | RNA methylation                               | ---                                      | -1.08         | -1.05           | -1.04     | 1.04        | 1.05      | -1.05       | 1.14       | 1.15         | 1.18       | -1.01        | 1.19       | 1.24         |
| RNPC3                                         | RNA-binding region (RNP)           | chr1p21              | mRNA processing                               | ---                                      | 1.03          | 1.07            | 1.01      | -1.06       | -1.04     | -1.11       | -1.15      | -1.10        | -1.15      | -1.27        | 1.11       | 1.04         |
| RNPC3                                         | RNA-binding region (RNP)           | chr1p21              | mRNA processing                               | ---                                      | -1.31         | -1.13           | 1.02      | -1.09       | 1.08      | 1.17        | -1.05      | 1.06         | -1.43      | -1.17        | -1.06      | -1.10        |
| RNPEP                                         | arginyl aminopeptidase (amino)     | chr1q32              | protein polyubiquitination                    | ---                                      | 1.06          | 1.06            | 1.05      | -1.07       | 1.01      | -1.02       | 1.06       | -1.06        | 1.05       | 1.05         | -1.24      | -1.31        |
| RNU86 /// RPL10A                              | RNA, U86 small nucleolar           | chr22q13             | nuclear-transcribed mRNA catabolic process    | Ribosomal_Proteins // GenMAPP            | -1.10         | -1.08           | -1.04     | -1.03       | 1.05      | -1.04       | 1.17       | 1.06         | 1.36       | 1.16         | -1.01      | 1.07         |
| RNU86 /// RPL10A                              | RNA, U86 small nucleolar           | chr22q13             | nuclear-transcribed mRNA catabolic process    | Ribosomal_Proteins // GenMAPP            | -1.10         | -1.03           | -1.04     | 1.00        | -1.01     | -1.06       | 1.11       | 1.03         | 1.40       | 1.10         | 1.07       | 1.11         |
| RNU86 /// RPL10A                              | RNA, U86 small nucleolar           | chr22q13             | nuclear-transcribed mRNA catabolic process    | Ribosomal_Proteins // GenMAPP            | -1.12         | -1.04           | -1.06     | -1.03       | -1.01     | -1.06       | 1.11       | 1.07         | 1.39       | 1.11         | 1.03       | 1.09         |
| ROCK2                                         | Rho-associated, coiled-coil        | chr2p24              | cytokinesis                                   | G13_Signaling_Pathway // GenMAPP /// Int | 1.16          | 1.19            | 1.04      | -1.08       | -1.06     | 1.03        | -1.29      | -1.17        | -1.64      | -1.36        | -1.43      | -1.41        |
| ROGDI                                         | rogdi homolog (Drosophila)         | chr16p13.3           | positive regulation of cell proliferation     | ---                                      | 1.11          | -1.05           | 1.02      | -1.00       | 1.12      | -1.02       | 1.17       | 1.10         | -1.52      | -1.63        | -1.99      | -1.61        |
| ROMO1                                         | reactive oxygen species modulator  | chr20q11.22          | replicative cell aging                        | ---                                      | -1.10         | -1.09           | -1.02     | -1.08       | 1.04      | -1.05       | 1.11       | 1.05         | 1.29       | 1.18         | 1.21       | 1.22         |
| ROR2                                          | receptor tyrosine kinase-like      | chr9q22              | cartilage condensation                        | ---                                      | -1.15         | -1.17           | 1.23      | 1.24        | 1.10      | 1.11        | 1.05       | 1.04         | 1.34       | 1.01         | 1.95       | 1.80         |
| ROR2                                          | receptor tyrosine kinase-like      | chr9q22              | skeletal system development                   | ---                                      | 1.04          | 1.16            | 1.07      | -1.01       | -1.04     | -1.15       | -1.06      | -1.14        | -1.58      | -1.45        | -1.87      | -1.81        |
| RORA                                          | RAR-related orphan receptor        | chr15q22.2           | transcription, DNA-dependent                  | Nuclear_Receptors // GenMAPP             | -1.12         | -1.11           | 1.10      | -1.02       | 1.52      | 1.58        | 1.58       | 1.26         | 3.48       | 3.49         | 4.00       | 4.64         |
| RORA                                          | RAR-related orphan receptor        | chr15q22.2           | transcription, DNA-dependent                  | Nuclear_Receptors // GenMAPP             | -1.32         | 1.01            | -1.02     | 1.14        | 1.30      | 1.38        | 1.51       | 1.15         | 3.35       | 3.20         | 3.76       | 4.65         |
| RORA                                          | RAR-related orphan receptor        | chr15q22.2           | transcription, DNA-dependent                  | Nuclear_Receptors // GenMAPP             | 1.58          | 1.35            | 1.15      | 1.32        | -1.29     | 1.03        | 1.42       | 1.22         | 1.43       | 2.36         | 3.00       | 3.48         |
| RORA                                          | RAR-related orphan receptor        | chr15q22.2           | transcription, DNA-dependent                  | Nuclear_Receptors // GenMAPP             | -1.05         | -1.42           | -1.38     | 1.19        | -1.24     | 1.22        | -1.15      | -1.33        | 2.98       | 3.30         | 2.33       | 2.52         |
| RORA                                          | RAR-related orphan receptor        | chr15q22.2           | transcription, DNA-dependent                  | Nuclear_Receptors // GenMAPP             | 1.78          | 1.96            | 1.27      | 1.98        | 1.36      | 1.64        | 1.14       | -1.39        | -2.81      | -1.64        | 1.43       | 1.27         |
| RORA                                          | RAR-related orphan receptor        | chr15q22.2           | transcription, DNA-dependent                  | Nuclear_Receptors // GenMAPP             | 1.16          | 1.04            | -1.08     | -1.10       | 1.31      | 1.19        | -1.42      | -1.23        | 1.31       | 1.75         | 1.16       | -1.03        |
| RORC                                          | RAR-related orphan receptor        | chr1q21              | transcription, DNA-dependent                  | Nuclear_Receptors // GenMAPP             | 1.72          | 2.22            | 1.11      | 1.48        | 1.91      | 2.43        | 1.55       | -1.09        | 1.73       | -1.02        | -3.87      | -1.59        |
| RORC                                          | RAR-related orphan receptor        | chr1q21              | transcription, DNA-dependent                  | Nuclear_Receptors // GenMAPP             | -1.10         | 1.03            | 1.00      | 1.05        | -1.06     | 1.08        | -1.18      | -1.32        | -1.34      | -2.93        | -1.53      |              |
| RP2                                           | retinitis pigmentosa 2 (X-linked)  | chrXp11.3            | cell morphogenesis                            | ---                                      | -1.35         | -1.51           | 1.43      | 1.18        | -1.15     | 1.43        | -1.12      | -1.35        | 2.42       | 2.61         | 2.27       | 1.29         |
| RP9                                           | retinitis pigmentosa 9 (autosomal) | chr7p14.3            | RNA splicing                                  | ---                                      | 1.24          | 1.25            | 1.05      | -1.05       | -1.30     | -1.13       | 1.28       | 1.27         | 1.43       | 1.03         | 1.46       | 1.35         |
| RP9 /// RP9P                                  | retinitis pigmentosa 9 (autosomal) | chr7p14.3            | RNA splicing                                  | ---                                      | 1.08          | -1.01           | -1.01     | -1.14       | 1.17      | -1.02       | 1.07       | 1.09         | 1.40       | 1.24         | 1.17       | 1.27         |
| RP9P                                          | retinitis pigmentosa 9 pseudogene  | chr7p14.3            | 0                                             | ---                                      | -1.06         | -1.06           | -1.04     | -1.06       | 1.16      | 1.02        | 1.09       | 1.06         | 1.33       | 1.11         | 1.17       | 1.34         |
| RP9P                                          | retinitis pigmentosa 9 pseudogene  | chr7p14.3            | 0                                             | ---                                      | -1.01         | -1.06           | 1.02      | -1.05       | 1.29      | 1.06        | 1.10       | 1.00         | 1.52       | 1.24         | 1.41       | 1.39         |
| RPA1                                          | replication protein A1, 70kDa      | chr17p13.3           | cell cycle checkpoint                         | DNA_replication_Reactome // GenMAPP ///  | 1.11          | 1.10            | -1.04     | -1.05       | -1.07     | -1.05       | -1.08      | -1.04        | -1.20      | -1.05        | -1.04      | -1.14        |
| RPA3                                          | replication protein A3, 14kDa      | chr7p22              | cell cycle checkpoint                         | DNA_replication_Reactome // GenMAPP ///  | -1.06         | -1.04           | -1.08     | -1.10       | -1.02     | -1.04       | -1.04      | -1.04        | -1.03      | -1.13        | -1.11      |              |
| RPAIN                                         | RPA interacting protein            | chr17p13.3           | DNA-dependent DNA replication                 | ---                                      | 1.03          | 1.03            | 1.04      | 1.04        | 1.04      | 1.02        | 1.07       | 1.07         | 1.03       | -1.00        | 1.21       | 1.16         |
| RPAP1                                         | RNA polymerase II associated       | chr15q15.1           | RNA biosynthetic process                      | ---                                      | -1.05         | -1.10           | 1.07      | 1.10        | -1.05     | 1.04        | 1.09       | -1.03        | 1.26       | 1.37         | 1.31       | 1.50         |
| RPAP2                                         | RNA polymerase II associated       | chr1p22.1            | transcription, DNA-dependent                  | ---                                      | 1.22          | 1.19            | 1.11      | 1.33        | 1.08      | -1.01       | 1.05       | 1.03         | -2.08      | -1.93        | -1.06      | -1.40        |
| RPAP2                                         | RNA polymerase II associated       | chr1p22.1            | transcription, DNA-dependent                  | ---                                      | 1.10          | -1.02           | 1.00      | 1.10        | 1.06      | 1.17        | 1.13       | 1.01         | -1.38      | -1.53        | 1.09       | 1.20         |
| RPAP3                                         | RNA polymerase II associated       | chr12q13.11          | 0                                             | ---                                      | 1.03          | 1.11            | 1.08      | -1.01       | -1.11     | -1.05       | -1.03      | 1.04         | -1.27      | -1.25        | 1.13       | -1.05        |
| RPF1                                          | ribosome production factor         | chr1p22.3            | rRNA processing                               | ---                                      | 1.04          | 1.11            | -1.03     | -1.05       | 1.07      | -1.05       | -1.06      | -1.00        | 1.05       | 1.00         | 1.39       | 1.17         |
| RPF2                                          | ribosome production factor         | chr6q21              | 0                                             | ---                                      | 1.04          | 1.08            | 1.01      | 1.07        | 1.05      | -1.09       | 1.15       | 1.14         | 1.38       | 1.16         | 1.73       | 1.58         |
| RPGR                                          | retinitis pigmentosa GTPase        | chrXp21.1            | intracellular protein transport               | ---                                      | 1.03          | 1.05            | 1.21      | 1.22        | -1.14     | -1.14       | 1.04       | 1.56         | -1.11      | -1.35        | -1.83      | -2.00        |
| RPGRIP1L                                      | RPGRIP1-like                       | chr16q12.2           | in utero embryonic development                | ---                                      | -1.05         | -1.09           | 1.09      | -1.10       | -1.13     | -1.02       | -1.30      | 1.01         | -3.29      | -2.78        | -2.46      | -2.49        |
| RPH3AL                                        | rabphilin 3A-like (without)        | chr17p13.3           | intracellular protein transport               | ---                                      | 1.05          | -1.01           | 1.10      | 1.11        | 1.21      | 1.12        | 1.13       | 1.02         | -1.88      | -1.76        | -2.36      | -2.16        |
| RPL10 /// SNRNP100                            | ribosomal protein L10 ///          | chrXq28              | nuclear-transcribed mRNA catabolic process    | Ribosomal_Proteins // GenMAPP            | 1.05          | 1.03            | -1.03     | 1.01        | -1.20     | -1.21       | 1.25       | 1.22         | 1.65       | 1.44         | 1.63       | 1.72         |
| RPL10A                                        | ribosomal protein L10a             | chr6p21.31           | nuclear-transcribed mRNA catabolic process    | ---                                      | -1.09         | -1.02           | -1.04     | -1.01       | 1.01      | -1.09       | 1.21       | 1.11         | 1.44       | 1.11         | 1.00       | 1.04         |
| RPL11                                         | ribosomal protein L11              | chr1p36.1-p35        | nuclear-transcribed mRNA catabolic process    | Ribosomal_Proteins // GenMAPP /// Ribos  | -1.03         | 1.00            | -1.04     | 1.05        | 1.03      | -1.04       | 1.20       | 1.05         | 1.40       | 1.10         | 1.11       | 1.09         |
| RPL13 /// SNRNP13                             | ribosomal protein L13 ///          | chr16q24.3 /// chr16 | nuclear-transcribed mRNA catabolic process    | Ribosomal_Proteins // GenMAPP            | -1.05         | -1.00           | -1.02     | 1.03        | 1.06      | 1.02        | 1.15       | 1.05         | 1.40       | 1.03         | -1.01      | -1.08        |
| RPL13 /// SNRNP13                             | ribosomal protein L13 ///          | chr16q24.3 /// chr16 | nuclear-transcribed mRNA catabolic process    | Ribosomal_Proteins // GenMAPP            | -1.18         | -1.14           | 1.03      | 1.10        | 1.00      | -1.01       | 1.26       | 1.22         | 1.33       | 1.00         | 2.04       | 1.76         |
| RPL13 /// SNRNP13                             | ribosomal protein L13 ///          | chr16q24.3 /// chr16 | nuclear-transcribed mRNA catabolic process    | Ribosomal_Proteins // GenMAPP            | 1.02          | -1.04           | -1.02     | -1.01       | 1.01      | -1.02       | 1.21       | 1.16         | -1.46      | -1.32        | -1.87      | -1.85        |
| RPL13A /// SNRNP13A                           | ribosomal protein L13a ///         | chr19q13.3           | nuclear-transcribed mRNA catabolic process    | Ribosomal_Proteins // GenMAPP            | -1.17         | -1.13           | -1.04     | -1.05       | -1.05     | -1.07       | 1.08       | 1.04         | 1.16       | 1.05         | -1.10      | -1.05        |
| RPL15                                         | ribosomal protein L15              | chr3p24.2            | nuclear-transcribed mRNA catabolic process    | Ribosomal_Proteins // GenMAPP /// Ribos  | -1.13         | -1.39           | -1.14     | -1.04       | 1.54      | 1.12        | -1.38      | -1.34        | -2.83      | -2.20        | -2.31      | -2.82        |
| RPL15                                         | ribosomal protein L15              | chr3p24.2            | nuclear-transcribed mRNA catabolic process    | Ribosomal_Proteins // GenMAPP /// Ribos  | -1.03         | 1.04            | -1.06     | -1.03       | -1.06     | -1.01       | -1.10      | -1.10        | -1.14      | -1.03        | -1.28      | -1.26        |
| RPL22                                         | ribosomal protein L22              | chr1p36.31           | nuclear-transcribed mRNA catabolic process    | Ribosomal_Proteins // GenMAPP            | -1.03         | 1.02            | -1.05     | -1.01       | -1.14     | -1.07       | 1.08       | -1.02        | 1.28       | 1.05         | -1.00      | -1.03        |
| RPL22                                         | ribosomal protein L22              | chr1p36.31           | nuclear-transcribed mRNA catabolic process    | Ribosomal_Proteins // GenMAPP            | 1.02          | 1.05            | -1.02     | -1.06       | 1.03      | 1.01        | 1.06       | -1.10        | -1.10      | -1.04        | -1.31      | -1.26        |
| RPL22L1                                       | ribosomal protein L22-like         | chr3q26.2            | translation                                   | ---                                      | 1.00          | 1.03            | -1.01     | 1.12        | -1.04     | -1.05       | 1.42       | 1.26         | 1.62       | 1.45         | 1.16       | -1.05        |
| RPL22P22 /// ribosomal protein L22 pseudogene |                                    | 0                    | ---                                           | ---                                      | -1.77         | -1.31           | 1.20      | 1.60        | -1.18     | 1.10        | -1.27      | -1.05        | -1.16      | -1.16        | 1.03       | 1.31         |
| RPL23 /// SNRNP23                             | ribosomal protein L23 ///          | chr17q /// chr17q12  | nuclear-transcribed mRNA catabolic process    | Ribosomal_Proteins // GenMAPP /// Ribos  | 1.02          | 1.02            | -1.02     | -1.04       | 1.01      | -1.02       | 1.04       | 1.06         | -1.03      | -1.50        | -1.03      | -1.42        |
| RPL23 /// SNRNP23                             | ribosomal protein L23 ///          | chr17q /// chr17q12  | nuclear-transcribed mRNA catabolic process    | Ribosomal_Proteins // GenMAPP /// Ribos  | 1.04          | 1.04            | 1.14      | 1.17        | 1.04      | -1.06       | -1.17      | 1.10         | -1.99      | -1.81        | -1.73      | -1.59        |
| RPL26L1                                       | ribosomal protein L26-like         | chr5q35.1            | nuclear-transcribed mRNA catabolic process    | ---                                      | -1.10         | -1.05           | -1.03     | 1.00        | 1.01      | -1.03       | 1.01       | 1.02         | 1.29       | 1.10         | 1.22       | 1.14         |
| RPL27A /// SNRNP27A                           | ribosomal protein L27a ///         | chr11p15             | nuclear-transcribed mRNA catabolic process    | Ribosomal_Proteins // GenMAPP            | -1.39         | -1.29           | 1.02      | -1.04       | 1.06      | -1.02       | -2.48      | -1.29        | -2.29      | -2.24        | -2.54      | -3.11        |
| RPL28                                         | ribosomal protein L28              | chr19q13.4           | nuclear-transcribed mRNA catabolic process    | Ribosomal_Proteins // GenMAPP            | 1.08          | -1.15           | -1.03     | 1.03        | -1.13     | -1.14       | 1.30       | 1.20         | -1.13      | -1.35        | -1.04      | -1.02        |
| RPL3                                          | ribosomal protein L3               | chr22q13             | nuclear-transcribed mRNA catabolic process    | Ribosomal_Proteins // GenMAPP            | -1.13         | -1.05           | -1.06     | -1.03       | 1.01      | -1.06       | 1.11       | 1.06         | 1.33       | 1.12         | -1.01      | 1.06         |
| RPL31                                         | ribosomal protein L31              | chr2q11.2            | nuclear-transcribed mRNA catabolic process    | Ribosomal_Proteins // GenMAPP /// Ribos  | 1.21          | 1.09            | 1.20      | 1.10        | -1.00     | 1.14        | -1.22      | -1.08        | -1.31      | -1.21        | -1.85      | -1.84        |
| RPL31 /// TB                                  | ribosomal protein L31 ///          | chr2q11.2            | nuclear-transcribed mRNA catabolic process    | Cell_cycle_KEGG // GenMAPP /// Ribosom   | 1.08          | 1.37            | -1.40     | -1.31       | -1.02     | 1.03        | 1.53       | 1.51         | -1.22      | -1.33        | -2.79      | -2.86        |
| RPL32P3                                       | ribosomal protein L32 pseudogene   | chr3q21.3            | 0                                             | ---                                      | 1.20          | 1.20            | 1.13      | 1.33        | 1.24      | 1.03        | 1.32       | 1.13         | -2.19      | -1.94        | -3.61      | -2.53        |
| RPL32P3                                       | ribosomal protein L32 pseudogene   | chr3q21.3            | 0                                             | ---                                      | 1.04          | -1.55           | 1.10      | 1.04        | 1.55      | 1.39        | 1.35       | 1.05         | -2.45      | -2.50        | -2.56      | -2.07        |

| ID           | Gene Title                                   | Chromosomal Location     | 1st Gene Ontology Biological Process         | Pathway                                                 | A2497 30 mins | A2497P' 30 mins | A2497 2 h | A2497P' 2 h | A2497 4 h | A2497P' 4 h | A2497 24 h | A2497P' 24 h | A2497 48 h | A2497P' 48 h | A2497 72 h | A2497P' 72 h |
|--------------|----------------------------------------------|--------------------------|----------------------------------------------|---------------------------------------------------------|---------------|-----------------|-----------|-------------|-----------|-------------|------------|--------------|------------|--------------|------------|--------------|
| RPL32P3      | ribosomal protein L32 pseudogene             | chr3q21.3                | 0                                            | ---                                                     | 1.98          | 1.29            | 1.07      | 1.17        | 1.08      | 1.21        | -1.30      | -1.48        | -1.55      | -1.68        | -1.98      | -2.08        |
| RPL35A       | ribosomal protein L35a                       | chr3q29                  | nuclear-transcribed mRNA catabolic process   | Ribosomal_Proteins // GenMAPP                           | -1.07         | -1.01           | 1.00      | 1.02        | 1.01      | 1.06        | 1.00       | 1.06         | -1.06      | 1.06         | -1.43      | -1.19        |
| RPL36A       | ribosomal protein L36a                       | chrXq22.1                | nuclear-transcribed mRNA catabolic process   | RNA_processing_Reactome // GenMAPP                      | 1.03          | -1.00           | 1.00      | 1.24        | 1.32      | 1.24        | -1.04      | 1.25         | -1.54      | -1.57        | -2.11      | -1.52        |
| RPL36AL      | ribosomal protein L36a-like                  | chr14q21                 | translation                                  | ---                                                     | -1.14         | -1.02           | -1.03     | -1.05       | 1.06      | -1.07       | 1.14       | 1.06         | 1.38       | 1.08         | 1.22       | 1.23         |
| RPL5 // SNO  | ribosomal protein L5 // small nucleolar RNA  | chr1p22.1                | nuclear-transcribed mRNA catabolic process   | Ribosomal_Proteins // GenMAPP                           | -1.07         | 1.01            | -1.03     | -1.01       | 1.01      | -1.03       | 1.12       | 1.02         | 1.39       | 1.11         | 1.01       | 1.04         |
| RPL7L1       | ribosomal protein L7-like 1                  | chr6p21.1                | 0                                            | ---                                                     | 1.03          | 1.00            | -1.01     | 1.03        | -1.05     | -1.03       | -1.01      | -1.07        | -1.09      | -1.14        | -1.15      | -1.15        |
| RPL7L1 // W  | ribosomal protein L7-like 1                  | chr10p11.23 // chr6p21.1 | 0                                            | ---                                                     | -1.15         | -1.07           | 1.03      | -1.02       | 1.02      | 1.03        | 1.11       | 1.02         | 1.24       | 1.12         | 1.26       | 1.30         |
| RPLP0        | ribosomal protein, large, P0                 | chr12q24.2               | nuclear-transcribed mRNA catabolic process   | Ribosomal_Proteins // GenMAPP                           | -1.08         | -1.03           | -1.04     | -1.02       | 1.04      | -1.07       | 1.12       | 1.02         | 1.40       | 1.12         | 1.05       | 1.07         |
| RPLP2        | ribosomal protein, large, P2                 | chr11p15.5               | nuclear-transcribed mRNA catabolic process   | ---                                                     | 1.82          | 1.51            | 1.21      | 1.34        | -1.20     | -1.11       | -1.10      | -1.39        | -1.31      | 1.11         | -1.32      | -1.10        |
| RPN1         | ribophorin I                                 | chr3q21.3                | translation                                  | Proteasome_Degradation // GenMAPP                       | 1.15          | 1.21            | -1.06     | -1.14       | -1.09     | -1.02       | -1.07      | -1.17        | 1.11       | 1.03         | 1.36       | 1.17         |
| RPN2         | ribophorin II                                | chr20q12-q13.1           | translation                                  | Proteasome_Degradation // GenMAPP                       | -1.04         | -1.02           | -1.07     | 1.01        | 1.03      | -1.06       | 1.17       | 1.03         | 1.09       | 1.04         | 1.02       | 1.11         |
| RPP21 // TR  | ribonuclease P/MRP 21kDa                     | chr6p21.3 // chr6p21.3   | apoptotic process                            | ---                                                     | 1.00          | 1.01            | -1.02     | 1.03        | 1.05      | -1.10       | 1.14       | -1.01        | 1.50       | 1.19         | 1.23       | 1.16         |
| RPP25L       | ribonuclease P/MRP 25kDa                     | chr9p13.3                | 0                                            | ---                                                     | -1.02         | -1.07           | 1.02      | 1.11        | -1.09     | -1.12       | 1.12       | 1.12         | -1.33      | -1.42        | -1.64      | -1.53        |
| RPP30        | ribonuclease P/MRP 30kDa                     | chr10q23.3               | tRNA processing                              | ---                                                     | -1.10         | -1.05           | -1.04     | -1.05       | 1.00      | -1.10       | 1.15       | 1.03         | 1.16       | -1.06        | 1.26       | 1.20         |
| RPP30        | ribonuclease P/MRP 30kDa                     | chr10q23.3               | tRNA processing                              | ---                                                     | 1.10          | 1.02            | 1.10      | 1.14        | 1.03      | 1.02        | -1.29      | -1.09        | -1.91      | -1.99        | -1.96      | -1.79        |
| RPP30        | ribonuclease P/MRP 30kDa                     | chr10q23.3               | tRNA processing                              | ---                                                     | 1.16          | 1.37            | 1.18      | 1.19        | -1.18     | 1.19        | -1.43      | -1.49        | -2.56      | -3.66        | -3.03      | -9.47        |
| RPP30        | ribonuclease P/MRP 30kDa                     | chr10q23.3               | tRNA processing                              | ---                                                     | 1.06          | 1.12            | 1.19      | -1.21       | -1.09     | 1.09        | -1.08      | -1.18        | -2.22      | -1.78        | -3.52      | -3.92        |
| RPP38        | ribonuclease P/MRP 38kDa                     | chr10p13                 | tRNA processing                              | ---                                                     | -1.10         | -1.16           | 1.03      | -1.05       | 1.15      | 1.00        | 1.04       | 1.01         | 1.21       | 1.00         | 1.41       | 1.49         |
| RPP40        | ribonuclease P/MRP 40kDa                     | chr6p25.1                | tRNA processing                              | ---                                                     | -1.19         | -1.15           | -1.01     | -1.07       | 1.11      | -1.02       | 1.01       | 1.00         | -1.37      | -1.40        | -1.15      | -1.24        |
| RPRD1A       | regulation of nuclear pre-mRNA processing    | chr18q12.2               | dephosphorylation of RNA polymerase I        | ---                                                     | 1.10          | 1.13            | 1.05      | -1.02       | 1.02      | -1.02       | -1.20      | -1.17        | -1.28      | -1.13        | -1.08      | -1.27        |
| RPRD1A       | regulation of nuclear pre-mRNA processing    | chr18q12.2               | dephosphorylation of RNA polymerase I        | ---                                                     | 1.02          | -1.08           | 1.13      | 1.15        | 1.13      | 1.14        | 1.26       | 1.06         | -1.07      | -1.02        | 1.42       | 1.53         |
| RPRD2        | regulation of nuclear pre-mRNA processing    | chr1q21.3                | 0                                            | ---                                                     | 1.02          | 1.13            | -1.01     | -1.10       | 1.03      | 1.01        | -1.06      | -1.00        | -1.31      | -1.26        | -1.38      | -1.39        |
| RPRD2        | regulation of nuclear pre-mRNA processing    | chr1q21.3                | 0                                            | ---                                                     | 1.04          | 1.03            | -1.03     | -1.05       | 1.04      | 1.03        | -1.16      | -1.08        | -1.64      | -1.66        | -1.27      | -1.37        |
| RPS10P2 // R | ribosomal protein S10 pseudogene             | ---                      | 0                                            | ---                                                     | -1.12         | -1.05           | -1.26     | -1.04       | 1.00      | 1.23        | -1.01      | 1.35         | 1.37       | 1.24         | -1.24      | -1.05        |
| RPS10P7      | ribosomal protein S10 pseudogene             | chr1q32.1                | 0                                            | ---                                                     | 1.44          | 1.13            | 1.28      | 1.23        | 1.79      | 1.64        | 1.40       | 1.09         | 1.61       | 1.26         | 1.89       | 1.85         |
| RPS14        | ribosomal protein S14                        | chr5q31-q33              | ribosomal small subunit assembly             | mRNA_processing_binding_Reactome // GenMAPP             | -1.07         | -1.01           | -1.05     | -1.03       | -1.00     | -1.03       | 1.12       | 1.05         | 1.37       | 1.08         | -1.01      | 1.02         |
| RPS15        | ribosomal protein S15                        | chr19p13.3               | ribosomal small subunit export from nucleus  | Ribosomal_Proteins // GenMAPP // Ribosome Biogenesis    | 2.08          | 2.28            | 1.25      | 1.56        | 1.14      | 1.02        | 1.78       | 1.81         | -10.27     | -1.81        | -1.64      | -1.55        |
| RPS15A       | ribosomal protein S15a                       | chr1p6p                  | nuclear-transcribed mRNA catabolic process   | ---                                                     | -1.07         | -1.02           | -1.01     | -1.02       | 1.13      | 1.03        | 1.08       | 1.05         | -1.05      | -1.14        | -1.46      | -1.37        |
| RPS19BP1     | ribosomal protein S19 binding protein 1      | chr22q13.1               | 0                                            | ---                                                     | 1.04          | -1.03           | 1.07      | 1.13        | -1.05     | -1.15       | 1.30       | 1.17         | 1.70       | 1.21         | 1.59       | 1.41         |
| RPS20 // SNO | ribosomal protein S20 // small nucleolar RNA | chr8q12                  | nuclear-transcribed mRNA catabolic process   | RNA_processing_binding_Reactome // GenMAPP              | 1.32          | 1.28            | 1.04      | -1.52       | 1.12      | 1.05        | -1.50      | -1.37        | -1.91      | -1.56        | -3.10      | -3.64        |
| RPS21        | ribosomal protein S21                        | chr20q13.3               | nuclear-transcribed mRNA catabolic process   | Ribosomal_Proteins // GenMAPP                           | -1.06         | -1.04           | -1.07     | -1.00       | 1.09      | 1.04        | 1.02       | 1.01         | 1.00       | 1.05         | -1.35      | -1.34        |
| RPS23        | ribosomal protein S23                        | chr5q14.2                | nuclear-transcribed mRNA catabolic process   | RNA_processing_binding_Reactome // GenMAPP              | 1.07          | 1.05            | 1.13      | -1.20       | 1.10      | 1.12        | 1.07       | -1.06        | -1.50      | -1.63        | -2.80      | -2.61        |
| RPS24        | ribosomal protein S24                        | chr10q22                 | nuclear-transcribed mRNA catabolic process   | RNA_processing_binding_Reactome // GenMAPP              | -1.07         | 1.07            | 1.43      | 1.34        | 1.07      | 1.16        | 1.13       | 1.14         | -1.69      | -1.79        | -1.89      | -1.89        |
| RPS24        | ribosomal protein S24                        | chr10q22                 | nuclear-transcribed mRNA catabolic process   | RNA_processing_binding_Reactome // GenMAPP              | 1.00          | 1.02            | -1.05     | 1.03        | 1.02      | 1.03        | 1.08       | -1.01        | 1.25       | 1.06         | 1.08       | 1.05         |
| RPS27A       | ribosomal protein S27a                       | chr2p16                  | cell cycle checkpoint                        | ---                                                     | 1.07          | -1.05           | -1.02     | 1.12        | 1.11      | 1.03        | -1.06      | 1.14         | -1.46      | -1.24        | -1.48      | -1.34        |
| RPS27L       | ribosomal protein S27-like                   | chr15q22.2               | DNA repair                                   | ---                                                     | 1.19          | 1.15            | -1.02     | -1.00       | -1.10     | 1.05        | -1.32      | -1.22        | -1.82      | -1.60        | -2.03      | -2.35        |
| RPS27L       | ribosomal protein S27-like                   | chr15q22.2               | DNA repair                                   | ---                                                     | -1.03         | 1.04            | -1.06     | -1.03       | 1.00      | -1.05       | 1.03       | 1.12         | -1.05      | 1.03         | -1.05      | -1.04        |
| RPS27L       | ribosomal protein S27-like                   | chr15q22.2               | DNA repair                                   | ---                                                     | -1.06         | 1.05            | -1.00     | 1.05        | -1.03     | -1.00       | -1.02      | 1.01         | 1.11       | 1.03         | -1.08      | -1.11        |
| RPS28        | ribosomal protein S28                        | chr19p13.2               | nuclear-transcribed mRNA catabolic process   | RNA_processing_binding_Reactome // GenMAPP              | -1.08         | -1.19           | 1.03      | 1.17        | 1.17      | -1.02       | 1.08       | 1.06         | -1.86      | -2.09        | -1.90      | -2.16        |
| RPS28        | ribosomal protein S28                        | chr19p13.2               | nuclear-transcribed mRNA catabolic process   | RNA_processing_binding_Reactome // GenMAPP              | -1.44         | -1.52           | -1.06     | 1.15        | 1.37      | 1.10        | 1.19       | -1.17        | -2.39      | -2.03        | -1.81      | -1.95        |
| RPS6         | ribosomal protein S6                         | chr9p21                  | ribosomal small subunit assembly             | mRNA_processing_binding_Reactome // GenMAPP             | 2.84          | 2.27            | -3.49     | -2.03       | 1.51      | 1.95        | -1.45      | -1.09        | 1.21       | 2.87         | 1.66       | 1.26         |
| RPS6KA1      | ribosomal protein S6 kinase                  | chr1p                    | tol-like receptor signaling pathway          | Ribosomal_Proteins // GenMAPP                           | -1.22         | -1.18           | -1.07     | -1.11       | -1.05     | -1.03       | -1.00      | 1.05         | 1.26       | 1.27         | 1.08       | 1.18         |
| RPS6KA2      | ribosomal protein S6 kinase                  | chr6q27                  | mitotic metaphase                            | Ribosomal_Proteins // GenMAPP                           | 1.05          | 1.14            | 1.06      | 1.04        | 1.06      | -1.04       | -1.14      | 1.09         | 1.40       | 1.06         | -1.05      | 1.08         |
| RPS6KA3      | ribosomal protein S6 kinase                  | chrXp22.2-p22.1          | skeletal system development                  | Ribosomal_Proteins // GenMAPP                           | 1.03          | 1.01            | 1.13      | 1.02        | -1.13     | -1.01       | -1.26      | -1.08        | -1.21      | -1.09        | -1.21      | -1.20        |
| RPS6KA4      | ribosomal protein S6 kinase                  | chr11q11-q13             | negative regulation of cytokine production   | ---                                                     | -1.22         | -1.13           | 1.10      | -1.08       | 1.25      | -1.06       | -1.04      | 1.23         | 1.38       | 1.23         | 1.14       | 1.28         |
| RPS6KA5      | ribosomal protein S6 kinase                  | chr14q31-q32.1           | negative regulation of cytokine production   | ---                                                     | 1.03          | -1.09           | 1.46      | 1.26        | 1.23      | 1.22        | -1.22      | -1.14        | -3.01      | -1.64        | -1.99      | -2.47        |
| RPS6KA6      | ribosomal protein S6 kinase                  | chrXq21                  | protein phosphorylation                      | Ribosomal_Proteins // GenMAPP                           | -1.84         | 1.07            | -2.00     | -1.57       | -1.29     | -2.48       | 3.06       | 1.40         | 1.43       | 1.80         | 2.59       | 16.74        |
| RPS6KA6      | ribosomal protein S6 kinase                  | chrXq21                  | protein phosphorylation                      | Ribosomal_Proteins // GenMAPP                           | -1.71         | -1.02           | -3.29     | -2.44       | 1.26      | 1.20        | -1.26      | -1.09        | 3.44       | 1.60         | 2.20       | 1.99         |
| RPS6KB1      | ribosomal protein S6 kinase                  | chr17q23.1               | G1                                           | G13_Signaling_Pathway // GenMAPP // Ribosome Biogenesis | -1.00         | 1.28            | -1.01     | -1.12       | -1.16     | -1.03       | -1.21      | 1.38         | -2.23      | -1.40        | 1.02       | -1.25        |
| RPS6KB1      | ribosomal protein S6 kinase                  | chr17q23.1               | G1                                           | G13_Signaling_Pathway // GenMAPP // Ribosome Biogenesis | -1.16         | -1.26           | -1.08     | -1.03       | 1.14      | 1.04        | -1.07      | -1.06        | -1.46      | -1.45        | -1.30      | -1.11        |
| RPS6KB1      | ribosomal protein S6 kinase                  | chr17q23.1               | G1                                           | G13_Signaling_Pathway // GenMAPP // Ribosome Biogenesis | 1.16          | 1.13            | -1.05     | 1.04        | -1.09     | 1.00        | -1.16      | -1.12        | -1.50      | -1.44        | -1.27      | -1.22        |
| RPS6KC1      | ribosomal protein S6 kinase                  | chr1q41                  | protein phosphorylation                      | ---                                                     | 1.01          | -1.05           | 1.14      | 1.13        | 1.20      | 1.10        | 1.15       | 1.21         | -1.52      | -1.49        | 1.09       | 1.15         |
| RPS7         | ribosomal protein S7                         | chr2p25                  | nuclear-transcribed mRNA catabolic process   | RNA_processing_binding_Reactome // GenMAPP              | -1.08         | 1.00            | -1.13     | -1.05       | -1.05     | -1.01       | 1.06       | 1.02         | 1.03       | 1.04         | -1.12      | -1.09        |
| RPS8 // SNO  | ribosomal protein S8 // small nucleolar RNA  | chr1p34.1 // chr1p34.1   | 0                                            | ---                                                     | -1.09         | -1.01           | -1.10     | -1.08       | 1.01      | -1.02       | 1.10       | 1.04         | 1.27       | 1.11         | 1.04       | 1.06         |
| RPS9         | ribosomal protein S9                         | chr19q13.4               | nuclear-transcribed mRNA catabolic process   | Ribosomal_Proteins // GenMAPP                           | -1.10         | -1.01           | -1.05     | -1.01       | 1.01      | -1.03       | 1.13       | 1.05         | 1.34       | 1.14         | 1.01       | 1.05         |
| RPS9         | ribosomal protein S9                         | chr19q13.4               | nuclear-transcribed mRNA catabolic process   | Ribosomal_Proteins // GenMAPP                           | -1.05         | -1.21           | -1.25     | -1.14       | -1.39     | -1.03       | -1.36      | -1.03        | -1.22      | 1.22         | -1.81      | -1.25        |
| RPS9         | ribosomal protein S9                         | chr19q13.4               | nuclear-transcribed mRNA catabolic process   | Ribosomal_Proteins // GenMAPP                           | -1.18         | -1.49           | -1.25     | -2.47       | -1.06     | 1.53        | 4.32       | 1.59         | -1.18      | 1.37         | -1.74      | -1.09        |
| RPSA         | ribosomal protein SA                         | chr3p22.2                | ribosomal small subunit assembly             | Ribosomal_Proteins // GenMAPP                           | -1.08         | -1.01           | -1.04     | -1.02       | -1.09     | -1.04       | 1.09       | 1.05         | 1.08       | 1.09         | -1.57      | -1.20        |
| RPSUD2       | RNA pseudouridylate synthetase               | chr15q13.3               | pseudouridine synthesis                      | ---                                                     | -1.00         | -1.12           | 1.12      | 1.05        | 1.03      | -1.05       | 1.09       | 1.08         | -1.06      | -1.19        | 1.12       | 1.27         |
| RPSUD3       | RNA pseudouridylate synthetase               | chr3p25.3                | pseudouridine synthesis                      | ---                                                     | -1.08         | -1.09           | -1.12     | -1.11       | -1.08     | -1.12       | 1.20       | 1.14         | 1.60       | 1.40         | 1.49       | 1.60         |
| RRAGB        | Ras-related GTP binding B                    | chrXp11.21               | signal transduction                          | ---                                                     | -1.09         | -1.18           | -1.11     | 1.01        | 1.54      | 1.16        | -1.15      | -1.20        | -2.08      | -2.43        | -1.97      | -2.08        |
| RRAGC        | Ras-related GTP binding C                    | chr1p34                  | GTP catabolic process                        | ---                                                     | 1.02          | -1.00           | -1.04     | -1.14       | -1.00     | -1.02       | -1.09      | -1.15        | -1.28      | -1.15        | 1.10       | 1.03         |
| RRAGC        | Ras-related GTP binding C                    | chr1p34                  | GTP catabolic process                        | ---                                                     | -1.14         | -1.17           | 1.02      | 1.06        | 1.06      | 1.05        | 1.26       | 1.25         | 1.16       | -1.05        | 1.21       | 1.42         |
| RRAGD        | Ras-related GTP binding D                    | chr6q15-q16              | positive regulation of TOR signaling cascade | ---                                                     | -1.28         | -1.36           | 1.06      | -1.28       | 1.03      | 1.10        | -1.36      | -1.08        | 1.14       | 1.09         | 1.27       | 1.27         |
| RRAGD        | Ras-related GTP binding D                    | chr6q15-q16              | positive regulation of TOR signaling cascade | ---                                                     | 1.09          | 1.08            | 1.01      | 1.10        | 1.08      | -1.05       | 1.32       | 1.13         | 1.69       | 1.73         | 1.97       | 2.48         |
| RRAS         | related RAS viral (r-ras) oncogene           | chr19q13.3-qter          | GTP catabolic process                        | G_Protein_Signaling // GenMAPP // MAPK                  | 1.07          | -1.05           | 1.07      | 1.12        | 1.25      | -1.01       | 1.42       | 1.15         | 2.26       | 1.90         | 2.48       | 2.15         |

| ID            | Gene Title                    | Chromosomal Location | 1st Gene Ontology Biological Process      | Pathway                               | A2497 30 mins | A2497P' 30 mins | A2497 2 h | A2497P' 2 h | A2497 4 h | A2497P' 4 h | A2497 24 h | A2497P' 24 h | A2497 48 h | A2497P' 48 h | A2497 72 h | A2497P' 72 h |
|---------------|-------------------------------|----------------------|-------------------------------------------|---------------------------------------|---------------|-----------------|-----------|-------------|-----------|-------------|------------|--------------|------------|--------------|------------|--------------|
| RRAS2         | related RAS viral (r-ras) on  | chr11p15.2           | GTP catabolic process                     | ---                                   | 1.15          | 1.12            | -1.02     | -1.10       | -1.06     | 1.00        | 1.04       | 1.26         | 1.29       | 1.37         | 1.47       | 1.33         |
| RRAS2         | related RAS viral (r-ras) on  | chr11p15.2           | GTP catabolic process                     | ---                                   | -1.02         | 1.11            | 1.12      | 1.09        | 1.11      | 1.10        | 1.04       | 1.21         | 1.64       | 1.77         | 1.42       | 1.36         |
| RRBP1         | ribosome binding protein 1    | chr20p12             | translation                               | ---                                   | -1.06         | -1.03           | -1.14     | -1.08       | 1.19      | 1.14        | 1.39       | 1.37         | 1.75       | 1.46         | 1.70       | 2.04         |
| RRBP1         | ribosome binding protein 1    | chr20p12             | translation                               | ---                                   | -1.04         | -1.04           | -1.07     | 1.03        | 1.06      | -1.07       | 1.12       | 1.12         | 1.91       | 1.69         | 1.62       | 2.00         |
| RRBP1         | ribosome binding protein 1    | chr20p12             | translation                               | ---                                   | 1.15          | 1.09            | -1.02     | -1.23       | -1.00     | -1.08       | 1.06       | 1.08         | 1.56       | 1.91         | 1.78       | 2.49         |
| RREB1         | ras responsive element bind   | chr6p25              | transcription, DNA-dependent              | ---                                   | 1.08          | 1.08            | -1.05     | 1.01        | -1.00     | -1.01       | -1.00      | -1.04        | 1.50       | 1.47         | 1.42       | 1.32         |
| RRM1          | ribonucleotide reductase M    | chr11p15.5           | DNA replication                           | Nucleotide_Metabolism // GenMAPP      | 1.08          | 1.04            | -1.00     | 1.02        | -1.00     | 1.04        | -1.02      | -1.08        | -1.00      | 1.02         | -1.12      | -1.07        |
| RRM2          | ribonucleotide reductase M    | chr2p25-p24          | G1                                        | ---                                   | -1.10         | -1.06           | -1.01     | -1.01       | 1.02      | -1.03       | 1.06       | 1.02         | 1.80       | 1.61         | 1.41       | 1.49         |
| RRN3 /// RRN3 | RRN3 RNA polymerase I         | chr16p11.2 /// chr16 | in utero embryonic development            | ---                                   | -1.13         | -1.05           | 1.01      | 1.00        | -1.14     | -1.08       | -1.27      | -1.03        | 1.07       | 1.36         | 1.98       | 1.12         |
| RRN3 /// RRN3 | RRN3 RNA polymerase I         | chr16p11.2 /// chr16 | in utero embryonic development            | ---                                   | 1.42          | 1.06            | -1.05     | -1.09       | -1.01     | 1.07        | -1.27      | 1.06         | -1.10      | -1.47        | -1.78      | -1.28        |
| RRN3P1        | RNA polymerase I transcrip    | chr16p12.2           | translational initiation                  | ---                                   | -1.19         | -1.41           | 1.21      | 1.37        | 1.05      | 1.06        | 1.04       | 1.17         | -1.80      | -2.02        | -1.82      | -1.28        |
| RRNAD1        | ribosomal RNA adenine de      | chr1q23.1            | rRNA modification                         | ---                                   | -1.05         | -1.08           | 1.16      | 1.01        | 1.12      | -1.00       | 1.12       | 1.05         | 1.28       | 1.26         | 1.61       | 1.84         |
| RRP1          | ribosomal RNA processing      | chr21q22.3           | rRNA processing                           | ---                                   | -1.24         | -1.23           | 1.04      | 1.05        | 1.06      | -1.04       | 1.01       | -1.01        | 1.21       | -1.14        | 1.14       | 1.24         |
| RRP12         | ribosomal RNA processing      | chr10q24.1           | 0                                         | ---                                   | -1.13         | -1.09           | 1.21      | 1.45        | 1.04      | 1.48        | -1.78      | -1.56        | 1.23       | 1.07         | 1.37       | 1.91         |
| RRP12         | ribosomal RNA processing      | chr10q24.1           | 0                                         | ---                                   | 1.04          | -1.14           | -1.28     | -1.48       | -1.46     | -1.02       | -1.00      | 1.03         | -1.26      | 1.17         | 1.13       | 1.40         |
| RRP15         | ribosomal RNA processing      | chr1q41              | 0                                         | ---                                   | 1.09          | 1.02            | -1.01     | 1.06        | 1.03      | 1.09        | -1.03      | -1.04        | -1.43      | -1.56        | -1.01      | -1.20        |
| RRP15         | ribosomal RNA processing      | chr1q41              | 0                                         | ---                                   | 1.30          | 1.19            | 1.03      | 1.18        | -1.39     | 1.08        | -1.72      | -1.44        | -2.49      | -1.92        | -2.11      | -2.41        |
| RRP1B         | ribosomal RNA processing      | chr21q22.3           | rRNA processing                           | ---                                   | 1.16          | 1.11            | -1.03     | -1.00       | -1.18     | -1.13       | 1.57       | 1.45         | 2.75       | 1.77         | 2.20       | 2.09         |
| RRP36         | ribosomal RNA processing      | chr6p21.1            | rRNA processing                           | ---                                   | 1.03          | 1.10            | 1.02      | 1.11        | 1.03      | 1.10        | -1.27      | -1.02        | -1.77      | -1.31        | -1.15      | 1.05         |
| RRP7A         | ribosomal RNA processing      | chr22q13.2           | 0                                         | ---                                   | -1.13         | -1.01           | 1.07      | 1.19        | -1.20     | -1.18       | 1.13       | 1.13         | 1.14       | -1.17        | 1.52       | 1.91         |
| RRP8          | ribosomal RNA processing      | chr11p15.4           | chromatin silencing at rDNA               | ---                                   | -1.17         | -1.09           | -1.07     | 1.10        | 1.02      | -1.11       | 1.29       | 1.25         | 1.41       | 1.23         | 1.41       | 1.51         |
| RRP9          | ribosomal RNA processing      | chr3p21.2            | rRNA processing                           | ---                                   | 1.04          | -1.12           | -1.01     | 1.12        | 1.02      | -1.06       | 1.03       | 1.17         | 1.31       | -1.06        | 1.34       | 1.38         |
| RSAD1         | radical S-adenosyl methion    | chr17q21.33          | porphyrin-containing compound biosynt     | ---                                   | 1.03          | -1.02           | -1.02     | 1.07        | 1.10      | -1.03       | -1.00      | 1.01         | 1.10       | 1.02         | 1.21       | 1.19         |
| RSAD2         | radical S-adenosyl methion    | chr2p25.2            | ossification                              | ---                                   | -1.24         | -1.94           | 1.65      | 2.50        | -1.10     | -1.29       | 6.30       | 6.16         | 1.13       | -2.71        | 1.11       | 1.57         |
| RSBN1         | round spermatid basic prote   | chr1p13.2            | 0                                         | ---                                   | -1.04         | -1.19           | 1.05      | 1.02        | 1.18      | 1.04        | 1.43       | -1.05        | 1.09       | 1.28         | 1.24       | 1.53         |
| RSF1          | remodeling and spacing fac    | chr11q14.1           | nucleosome assembly                       | ---                                   | -1.06         | -1.08           | 1.06      | -1.01       | 1.00      | -1.02       | 1.14       | 1.20         | 1.29       | 1.18         | 1.14       | 1.28         |
| RSF1          | remodeling and spacing fac    | chr11q14.1           | nucleosome assembly                       | ---                                   | 1.23          | 1.06            | 1.13      | 1.01        | 1.01      | 1.29        | 1.23       | 1.18         | 1.18       | 1.27         | 1.33       | 1.10         |
| RSF1          | remodeling and spacing fac    | chr11q14.1           | nucleosome assembly                       | ---                                   | 1.15          | 1.07            | 1.03      | -1.33       | 1.06      | 1.09        | -1.26      | 1.01         | -1.82      | -1.59        | -1.41      | -1.63        |
| RSF1          | remodeling and spacing fac    | chr11q14.1           | nucleosome assembly                       | ---                                   | -1.09         | -1.10           | 1.17      | 1.06        | 1.13      | 1.08        | 1.34       | 1.08         | 1.18       | 1.27         | 1.31       | 1.41         |
| RSL1D1        | ribosomal L1 domain conta     | chr16p13.13          | translation                               | ---                                   | -1.24         | -1.26           | -1.26     | -1.28       | 1.03      | 1.03        | -1.03      | 1.20         | -1.93      | -1.90        | 1.24       | 1.11         |
| RSL1D1        | ribosomal L1 domain conta     | chr16p13.13          | translation                               | ---                                   | -1.19         | -1.16           | -1.01     | -1.16       | -1.07     | -1.13       | -1.01      | 1.14         | -1.61      | -1.35        | 1.32       | 1.47         |
| RSL24D1       | ribosomal L24 domain conta    | chr15q21             | ribosome biogenesis                       | ---                                   | 1.05          | 1.05            | 1.01      | -1.00       | 1.04      | -1.04       | 1.15       | -1.08        | 1.18       | 1.05         | 1.48       | 1.33         |
| RSPH3         | radial spoke 3 homolog (C     | chr6q25.3            | 0                                         | ---                                   | -1.10         | 1.11            | 1.13      | 1.28        | 1.11      | -1.03       | 1.02       | 1.23         | 1.23       | 1.40         | 1.33       | 1.47         |
| RSPH3         | radial spoke 3 homolog (C     | chr6q25.3            | 0                                         | ---                                   | 1.01          | 1.23            | 1.03      | 1.14        | 1.02      | 1.09        | 1.32       | 1.13         | 1.34       | 1.19         | 1.45       | 1.52         |
| RSPO1         | R-spondin 1                   | chr1p34.3            | regulation of receptor internalization    | ---                                   | 2.66          | -1.73           | -2.73     | -1.67       | -1.04     | 1.14        | -3.32      | -1.80        | 2.27       | -1.54        | -2.07      | -1.09        |
| RSPO2         | R-spondin 2                   | chr8q23.1            | osteoblast differentiation                | ---                                   | 1.36          | 1.91            | 2.31      | 3.83        | 1.45      | -1.05       | 1.54       | 2.29         | 6.36       | 4.86         | 1.73       | -1.38        |
| RSPO3         | R-spondin 3                   | chr6q22.33           | Wnt receptor signaling pathway            | ---                                   | 1.08          | 1.03            | 1.11      | 1.09        | 1.02      | 1.03        | -1.04      | -1.07        | 1.96       | 1.68         | 1.96       | 1.75         |
| RSPRY1        | ring finger and SPRY dom      | chr16q13             | 0                                         | ---                                   | 1.06          | 1.01            | -1.03     | -1.05       | -1.09     | 1.12        | -1.14      | -1.10        | -1.27      | -1.04        | -1.38      | -1.40        |
| RSRC2         | arginine/serine-rich coiled-  | chr12q24.31          | 0                                         | ---                                   | -1.03         | -1.03           | 1.09      | 1.13        | 1.02      | -1.03       | 1.10       | -1.00        | 1.24       | 1.33         | 1.39       | 1.28         |
| RSRC2         | arginine/serine-rich coiled-  | chr12q24.31          | 0                                         | ---                                   | -1.02         | 1.01            | 1.12      | 1.00        | 1.31      | 1.05        | 1.03       | -1.10        | 1.26       | 1.10         | 1.32       | 1.46         |
| RSU1          | Ras suppressor protein 1      | chr10p13             | signal transduction                       | ---                                   | 1.13          | 1.10            | -1.06     | -1.19       | -1.15     | 1.01        | -1.20      | -1.22        | -1.27      | -1.13        | -1.07      | -1.33        |
| RSU1          | Ras suppressor protein 1      | chr10p13             | signal transduction                       | ---                                   | 3.82          | 3.71            | -1.40     | -1.61       | -1.01     | 1.11        | 1.25       | 1.07         | 1.62       | 1.09         | 1.37       | -1.05        |
| RSU1          | Ras suppressor protein 1      | chr10p13             | signal transduction                       | ---                                   | 1.14          | 1.02            | 1.09      | -1.05       | -1.11     | -1.02       | -1.38      | -1.22        | -1.99      | -1.27        | -2.48      | -2.07        |
| RTCA          | RNA 3'-terminal phosphate     | chr1p21.2            | RNA processing                            | ---                                   | 1.10          | 1.08            | 1.09      | 1.02        | 1.11      | -1.02       | 1.24       | 1.03         | 1.02       | 1.01         | 1.21       | 1.12         |
| RTDR1         | rhabdoid tumor deletion reg   | chr22q11.2           | 0                                         | ---                                   | 2.01          | 1.18            | -4.24     | -1.77       | -1.91     | -1.37       | -1.23      | -1.13        | -1.87      | -7.77        | 1.16       | -1.20        |
| RTEL1         | regulator of telomere elong   | chr20q13.3           | telomere maintenance                      | ---                                   | 1.34          | 1.31            | 1.04      | 1.27        | 1.04      | 1.17        | 1.03       | 1.19         | 1.27       | -1.16        | -1.34      | -1.19        |
| RTEL1         | regulator of telomere elong   | chr20q13.3           | telomere maintenance                      | ---                                   | 1.12          | 1.15            | -1.04     | 1.15        | -1.12     | -1.05       | 1.56       | 1.18         | 1.44       | -1.02        | -1.67      | -1.38        |
| RTF1          | Rtf1, Paf1/RNA polymeras      | chr15q15.1           | negative regulation of transcription from | ---                                   | 1.14          | 1.06            | 1.01      | -1.00       | -1.08     | 1.02        | -1.08      | 1.00         | -1.44      | -1.24        | -1.30      | -1.45        |
| RTTFDC1       | replication termination fac   | chr20q13.31          | 0                                         | ---                                   | 1.29          | 1.39            | -2.07     | 1.07        | -1.54     | -1.56       | -2.59      | -1.03        | 4.02       | 3.37         | 2.32       | 1.55         |
| RTKN2         | roctekin 2                    | chr10q21.2           | signal transduction                       | ---                                   | -1.10         | -1.11           | -2.81     | -2.12       | -2.62     | 2.08        | -1.74      | 2.98         | 8.85       | 3.75         | 1.74       | 2.42         |
| RTN2          | reticulin 2                   | chr19q13.32          | signal transduction                       | ---                                   | -1.45         | -1.84           | 1.03      | 1.30        | 1.15      | 1.03        | 1.01       | 1.27         | -2.13      | -1.57        | -1.06      | -1.30        |
| RTN2          | reticulin 2                   | chr19q13.32          | signal transduction                       | ---                                   | 1.17          | 1.03            | -1.34     | -1.11       | -1.35     | -1.42       | -1.09      | -1.12        | -1.53      | -1.28        | -1.40      | -1.29        |
| RTN3          | reticulin 3                   | chr11q13             | transport                                 | ---                                   | -1.03         | 1.04            | -1.10     | -1.02       | -1.08     | -1.04       | -1.07      | -1.11        | -1.04      | -1.01        | 1.01       | -1.00        |
| RTN3          | reticulin 3                   | chr11q13             | protein phosphorylation                   | Nuclear_Receptors // GenMAPP          | 1.09          | 1.13            | -1.06     | 1.01        | -1.08     | -1.02       | -1.11      | -1.17        | -1.03      | -1.08        | -1.01      | -1.15        |
| RTN4IP1       | reticulin 4 interacting prote | chr6q21              | oxidation-reduction process               | ---                                   | 1.08          | 1.03            | 1.06      | 1.05        | 1.05      | 1.02        | -1.23      | -1.20        | -1.62      | -1.67        | -1.25      | -1.11        |
| RTN4IP1       | reticulin 4 interacting prote | chr6q21              | oxidation-reduction process               | ---                                   | 1.05          | 1.01            | 1.08      | 1.11        | 1.00      | -1.02       | -1.18      | 1.00         | -1.24      | -1.40        | -1.24      | -1.20        |
| RTN4R         | reticulin 4 receptor          | chr22q11.21          | axonogenesis                              | ---                                   | 1.42          | 1.35            | 1.37      | 1.47        | 1.15      | -1.08       | -1.82      | -1.05        | 1.11       | -1.34        | 1.48       | 1.63         |
| RTTN          | rotatin                       | chr18q22.2           | multicellular organismal development      | ---                                   | -1.02         | -1.39           | -1.43     | -1.55       | -1.13     | 1.03        | 1.75       | 1.23         | 2.95       | 1.26         | 1.09       | -1.14        |
| RUFY3         | RUN and FYVE domain co        | chr4q13.3            | multicellular organismal development      | ---                                   | 1.20          | 1.06            | 1.29      | 1.25        | 1.10      | 1.10        | 1.42       | 1.21         | 1.19       | 1.14         | 1.44       | 1.33         |
| RUFY3         | RUN and FYVE domain co        | chr4q13.3            | multicellular organismal development      | ---                                   | 1.04          | 1.06            | -1.02     | -1.12       | 1.16      | 1.24        | -1.57      | -1.35        | 1.51       | 1.60         | -1.20      | -1.22        |
| RUNDCl        | RUN domain containing 1       | chr17q21.31          | 0                                         | ---                                   | 1.04          | -1.03           | -1.21     | -1.15       | 1.38      | 1.14        | 1.15       | 1.25         | 1.02       | 1.12         | -1.06      | -1.06        |
| RUNDCl        | RUN domain containing 1       | chr17q21.31          | 0                                         | ---                                   | -1.02         | -1.10           | 1.08      | -1.04       | 1.01      | 1.05        | 1.03       | 1.07         | -1.21      | -1.15        | -1.00      | 1.01         |
| RUNDCA        | RUN domain containing 3       | chr17q21.31          | small GTPase mediated signal transducti   | ---                                   | 1.11          | -2.90           | 1.57      | -1.00       | 1.42      | 1.78        | 3.77       | 2.55         | 1.18       | -1.20        | 2.26       | 3.98         |
| RUNX1T1       | runt-related transcription fa | chr8q22              | generation of precursor metabolites and c | ---                                   | -1.20         | -1.03           | 2.34      | 2.82        | 1.14      | 1.14        | 3.21       | 4.23         | -1.71      | -1.71        | -1.54      | 2.00         |
| RUNX1T1       | runt-related transcription fa | chr8q22              | generation of precursor metabolites and c | ---                                   | 1.82          | -1.30           | -2.44     | -3.40       | 3.68      | 1.35        | -3.60      | 2.24         | 5.11       | 3.16         | 3.90       | 4.53         |
| RUNX2         | runt-related transcription fa | chr6p21              | skeletal system development               | TGF_Beta_Signaling_Pathway // GenMAPP | -1.02         | 1.13            | -1.04     | -1.22       | -1.10     | -1.12       | 1.04       | -1.03        | 1.35       | 1.28         | 1.76       | 1.44         |

| ID        | Gene Title                        | Chromosomal Location | 1st Gene Ontology Biological Process      | Pathway                                    | A2497 30 mins | A2497P' 30 mins | A2497 2 h | A2497P' 2 h | A2497 4 h | A2497P' 4 h | A2497 24 h | A2497P' 24 h | A2497 48 h | A2497P' 48 h | A2497 72 h | A2497P' 72 h |
|-----------|-----------------------------------|----------------------|-------------------------------------------|--------------------------------------------|---------------|-----------------|-----------|-------------|-----------|-------------|------------|--------------|------------|--------------|------------|--------------|
| RUNX3     | runx-related transcription factor | chr1p36              | negative regulation of transcription from | TGF_Beta_Signaling_Pathway // GenMAPP      | 1.12          | 1.27            | -1.05     | -1.41       | 1.16      | 1.12        | 1.10       | -1.02        | 2.16       | 2.11         | 2.15       | 2.43         |
| RUNX3     | runx-related transcription factor | chr1p36              | negative regulation of transcription from | TGF_Beta_Signaling_Pathway // GenMAPP      | -1.01         | -1.01           | -1.01     | -1.04       | 1.00      | 1.09        | 1.18       | 1.04         | 2.21       | 2.06         | 2.03       | 2.09         |
| RUSC1     | RUN and SH3 domain containing     | chr1q21-q22          | protein polyubiquitination                | ---                                        | 1.05          | -1.03           | 1.03      | 1.21        | 1.02      | 1.03        | 1.13       | 1.07         | 1.44       | 1.30         | 1.15       | 1.32         |
| RUSC1-AS1 | RUSC1 antisense RNA 1             | chr1q22              | 0                                         | ---                                        | -1.08         | -1.29           | 1.13      | 1.10        | 1.19      | 1.25        | 1.07       | -1.01        | -1.61      | -1.46        | 1.40       | 1.60         |
| RUSC1-AS1 | RUSC1 antisense RNA 1             | chr1q22              | 0                                         | ---                                        | 1.01          | -1.02           | 1.19      | 1.01        | 1.24      | 1.18        | -1.03      | 1.03         | -1.21      | -1.14        | 1.48       | 1.74         |
| RUSC2     | RUN and SH3 domain containing     | chr9p13.3            | 0                                         | ---                                        | 1.01          | 1.18            | -1.03     | -1.07       | -1.04     | -1.01       | 1.14       | 1.16         | 1.50       | 1.40         | 1.28       | 1.24         |
| RWDD1     | RWD domain containing 1           | chr6q13-q22.33       | 0                                         | ---                                        | 1.24          | 1.54            | 1.06      | 1.17        | 1.16      | -1.17       | -1.04      | 1.03         | -2.07      | -1.46        | -3.47      | -4.52        |
| RWDD2A    | RWD domain containing 2           | chr6q14.2            | 0                                         | ---                                        | -1.31         | -1.28           | 1.02      | -1.17       | 1.13      | 1.05        | 1.08       | 1.12         | 1.10       | -1.05        | 1.58       | 1.49         |
| RWDD2B    | RWD domain containing 2           | chr21q22.11          | 0                                         | ---                                        | -1.05         | -1.02           | -1.00     | -1.01       | -1.01     | -1.05       | 1.19       | 1.11         | 1.10       | 1.11         | -1.25      | -1.14        |
| RWDD3     | RWD domain containing 3           | chr1p21.3            | 0                                         | ---                                        | 1.32          | 1.17            | -1.20     | -1.10       | -1.11     | -1.10       | -1.11      | -1.04        | -1.51      | -1.48        | -1.45      | -1.65        |
| RWDD4     | RWD domain containing 4           | chr4q35.1            | 0                                         | ---                                        | 1.12          | 1.14            | 1.02      | 1.07        | -1.07     | 1.03        | -1.12      | -1.11        | -1.07      | -1.02        | -1.14      | -1.21        |
| RXRA      | retinoid X receptor, alpha        | chr9q34.3            | negative regulation of transcription from | Nuclear_Receptors // GenMAPP               | -1.20         | -1.17           | -1.07     | 1.09        | 1.09      | -1.05       | -1.14      | 1.07         | -1.45      | -1.28        | -1.28      | -1.07        |
| RXRA      | retinoid X receptor, alpha        | chr9q34.3            | negative regulation of transcription from | Nuclear_Receptors // GenMAPP               | 1.03          | -1.02           | -1.02     | 1.03        | 1.02      | -1.00       | 1.36       | 1.36         | 2.74       | 2.37         | 1.47       | 1.58         |
| RXRB      | retinoid X receptor, beta         | chr6p21.3            | in utero embryonic development            | Nuclear_Receptors // GenMAPP               | -1.10         | 1.14            | 1.09      | 1.03        | 1.05      | -1.06       | 1.10       | 1.38         | 1.09       | 1.12         | 1.19       | 1.17         |
| RYBP      | RING1 and YY1 binding             | chr3p13              | negative regulation of transcription from | ---                                        | 1.07          | -1.06           | 1.02      | 1.06        | -1.07     | -1.02       | -1.00      | -1.01        | -1.01      | 1.22         | 1.13       | 1.03         |
| RYK       | receptor-like tyrosine kinase     | chr3q22              | protein phosphorylation                   | ---                                        | 1.40          | 1.32            | 1.28      | 1.15        | 1.09      | 1.11        | -1.28      | -1.45        | -1.21      | -1.28        | -1.26      | -1.30        |
| RYK       | receptor-like tyrosine kinase     | chr3q22              | protein phosphorylation                   | ---                                        | -1.02         | 1.08            | 1.01      | -1.08       | -1.05     | 1.01        | 1.01       | 1.01         | -1.12      | 1.05         | -1.13      | -1.38        |
| RYR3      | ryanodine receptor 3              | chr15q14-q15         | calcium ion transport                     | ---                                        | 1.88          | 1.77            | 1.15      | 1.17        | 1.03      | 1.02        | 1.25       | 1.16         | -2.96      | -3.37        | -3.15      | -13.10       |
| S100A10   | S100 calcium binding protein      | chr1q21              | signal transduction                       | ---                                        | -1.04         | 1.02            | -1.04     | -1.10       | -1.04     | -1.06       | 1.14       | 1.00         | 1.38       | 1.31         | 1.31       | 1.38         |
| S100A11   | S100 calcium binding protein      | chr1q21              | signal transduction                       | ---                                        | -1.09         | -1.13           | -1.12     | -1.07       | 1.02      | -1.06       | 1.04       | 1.07         | 1.83       | 1.72         | 1.31       | 1.42         |
| S100A11P1 | S100 calcium binding protein      | ---                  | 0                                         | ---                                        | 1.29          | -1.05           | -1.26     | 1.14        | -1.05     | 1.28        | -1.08      | -1.16        | 1.56       | 1.00         | 1.04       | 1.03         |
| S100A13   | S100 calcium binding protein      | chr1q21              | transport                                 | ---                                        | -1.04         | -1.03           | 1.05      | -1.12       | 1.03      | 1.05        | -1.18      | -1.14        | -1.00      | 1.11         | 1.22       | 1.25         |
| S100A14   | S100 calcium binding protein      | chr1q21.3            | apoptotic process                         | ---                                        | -1.18         | -1.28           | -1.05     | -1.07       | -1.10     | -1.05       | 1.23       | 1.23         | 1.78       | 2.27         | 1.60       | 2.32         |
| S100A16   | S100 calcium binding protein      | chr1q21              | response to calcium ion                   | ---                                        | 1.00          | 1.01            | -1.06     | 1.02        | -1.03     | 1.01        | -1.05      | -1.08        | 1.38       | 1.27         | 1.24       | 1.26         |
| S100A2    | S100 calcium binding protein      | chr1q21              | endothelial cell migration                | ---                                        | -1.06         | -1.05           | -1.09     | -1.29       | -1.03     | -1.08       | -1.03      | -1.01        | 1.38       | 1.21         | 1.43       | 1.36         |
| S100A3    | S100 calcium binding protein      | chr1q21              | 0                                         | ---                                        | 1.01          | 1.03            | 1.01      | -1.05       | -1.01     | 1.05        | -1.14      | -1.13        | 1.26       | 1.40         | 1.41       | 1.22         |
| S100A4    | S100 calcium binding protein      | chr1q21              | epithelial to mesenchymal transition      | ---                                        | -1.06         | 1.01            | -1.08     | -1.01       | -1.05     | -1.05       | 1.04       | -1.00        | 1.12       | 1.03         | -1.09      | -1.15        |
| S100A6    | S100 calcium binding protein      | chr1q21              | signal transduction                       | Prostaglandin_synthesis_regulation // GenM | -1.03         | -1.04           | -1.05     | -1.04       | -1.04     | -1.04       | 1.15       | 1.07         | 1.58       | 1.37         | 1.46       | 1.50         |
| S100A7    | S100 calcium binding protein      | chr1q21              | response to reactive oxygen species       | ---                                        | 1.25          | -4.60           | -1.42     | -2.10       | -1.24     | -1.99       | -1.06      | 1.12         | -1.16      | -1.02        | 4.73       | 2.15         |
| S100A8    | S100 calcium binding protein      | chr1q21              | cytokine production                       | ---                                        | 1.31          | 1.14            | 1.81      | 2.00        | -3.14     | -1.31       | 2.07       | 1.19         | 6.19       | 3.65         | 7.76       | 7.81         |
| S100A8    | S100 calcium binding protein      | chr1q21              | cytokine production                       | ---                                        | -1.09         | 2.23            | -1.80     | -1.04       | 1.33      | -1.82       | -1.25      | -1.29        | 17.07      | 6.92         | 23.66      | 19.68        |
| S100A9    | S100 calcium binding protein      | chr1q21              | cytokine production                       | ---                                        | 1.34          | -1.30           | -2.04     | -1.48       | 1.59      | 1.01        | 2.79       | 8.45         | -1.96      | -1.27        | 7.82       | 7.38         |
| S100P     | S100 calcium binding protein      | chr4p16              | response to organic substance             | ---                                        | -1.06         | -1.15           | -1.08     | 1.05        | 1.26      | -1.15       | 1.27       | 1.17         | 1.48       | 1.26         | 1.36       | 1.18         |
| S100BP    | S100P binding protein             | chr1p35.1            | 0                                         | ---                                        | -1.15         | -1.01           | 1.05      | 1.07        | 1.19      | 1.05        | 1.39       | 1.01         | 1.56       | 1.49         | 2.34       | 2.21         |
| S1PR1     | sphingosine-1-phosphate receptor  | chr1p21              | angiogenesis                              | GPCRDB_Other // GenMAPP /// S1P_Signa      | 1.25          | 1.11            | 1.18      | -1.05       | 2.34      | 1.13        | 1.76       | 1.60         | 5.50       | 1.99         | -14.68     | 1.22         |
| S1PR2     | sphingosine-1-phosphate receptor  | chr19p13.2           | activation of MAPK activity               | S1P_Signaling // GenMAPP /// Small_ligand  | -1.06         | 1.09            | 1.37      | 1.43        | -1.07     | -1.01       | 1.25       | 1.03         | 1.92       | 1.59         | 1.78       | 1.65         |
| S1PR3     | sphingosine-1-phosphate receptor  | chr9q22.1-q22.2      | cytokine production                       | S1P_Signaling // GenMAPP /// Small_ligand  | -1.01         | 1.04            | 1.10      | -1.03       | -1.06     | -1.19       | -1.31      | -1.24        | -2.08      | -1.67        | -1.63      | -1.81        |
| SAAL1     | serum amyloid A1                  | chr1p15.1            | acute-phase response                      | ---                                        | -1.03         | -1.22           | 1.10      | 1.32        | 1.67      | 1.38        | -1.52      | 1.54         | 1.52       | 1.23         | 3.20       | 1.84         |
| SAAL1     | serum amyloid A1                  | chr1p15.1            | acute-phase response                      | ---                                        | 1.17          | 1.01            | 1.21      | 1.22        | 1.58      | 1.27        | 1.45       | 1.66         | 2.09       | 1.79         | 3.45       | 2.15         |
| SAAL1     | serum amyloid A-like 1            | chr1p15.1            | acute-phase response                      | ---                                        | 1.03          | 1.07            | 1.03      | -1.01       | 1.01      | 1.02        | 1.10       | 1.04         | -1.36      | -1.36        | -1.23      | -1.30        |
| SACM1L    | SAC1 suppressor of actin          | chr3p21.3            | phospholipid metabolic process            | ---                                        | -1.04         | -1.09           | -1.07     | 1.02        | -1.08     | -1.03       | -1.15      | -1.04        | -1.18      | -1.04        | -1.18      | -1.13        |
| SACS      | spastic ataxia of Charlevoix      | chr13q12             | protein folding                           | ---                                        | 1.08          | 1.07            | -1.03     | -1.12       | -1.07     | 1.03        | -1.51      | -1.20        | -2.26      | -2.46        | -1.45      | -1.68        |
| SAE1      | SUMO1 activating enzyme           | chr19q13.32          | cellular protein modification process     | ---                                        | -1.00         | 1.04            | -1.02     | -1.07       | 1.00      | 1.03        | 1.01       | -1.07        | -1.11      | -1.13        | -1.10      | -1.11        |
| SAG       | S-antigen; retina and pineal      | chr2q37.1            | signal transduction                       | ---                                        | 1.59          | 1.68            | 11.97     | 4.35        | 1.59      | 2.57        | -1.60      | 1.83         | 2.32       | 1.55         | 3.84       | 2.18         |
| SAMD10    | sterile alpha motif domain        | chr20q13.33          | 0                                         | ---                                        | -1.18         | 1.08            | -1.00     | 1.22        | -1.04     | 1.05        | 1.11       | 1.15         | 1.15       | 1.23         | 1.11       | 1.27         |
| SAMD11    | sterile alpha motif domain        | chr1p36.33           | negative regulation of transcription from | ---                                        | -1.10         | -1.13           | -1.00     | 1.08        | -1.04     | -1.04       | -1.07      | -1.11        | -1.49      | -1.68        | -1.40      | -1.41        |
| SAMD12    | sterile alpha motif domain        | chr8q24.12           | 0                                         | ---                                        | -1.04         | 1.00            | 1.05      | -1.01       | -1.21     | -1.14       | -1.14      | -1.06        | -1.77      | -1.61        | -1.34      | -1.89        |
| SAMD13    | sterile alpha motif domain        | chr1p31.1            | 0                                         | ---                                        | 1.14          | -1.33           | 1.49      | 1.59        | 1.41      | -1.46       | -1.15      | -1.05        | 1.08       | 1.34         | -1.24      | -1.83        |
| SAMD3     | sterile alpha motif domain        | chr6q23.1            | 0                                         | ---                                        | 1.27          | 1.03            | 1.05      | -1.53       | 1.40      | -1.20       | 2.82       | 2.36         | 2.44       | 2.11         | -2.14      | 1.17         |
| SAMD4A    | sterile alpha motif domain        | chr14q22.2           | regulation of translation                 | ---                                        | 1.42          | 1.05            | 2.64      | -1.69       | 1.44      | -1.00       | 1.19       | 1.01         | 14.04      | 7.64         | 8.33       | 8.86         |
| SAMD4A    | sterile alpha motif domain        | chr14q22.2           | regulation of translation                 | ---                                        | 10.92         | 11.89           | 5.77      | 5.76        | -1.63     | -1.39       | -2.24      | 1.36         | -1.39      | 1.37         | 1.04       | 1.27         |
| SAMD4A    | sterile alpha motif domain        | chr14q22.2           | regulation of translation                 | ---                                        | 1.04          | -1.30           | 1.10      | -1.48       | -1.33     | 1.07        | 1.73       | 1.61         | 1.47       | 1.45         | 1.64       | 1.46         |
| SAMD4B    | sterile alpha motif domain        | chr19q13.2           | transcription, DNA-dependent              | ---                                        | 1.17          | 1.15            | 1.04      | 1.16        | 1.11      | 1.11        | -1.12      | -1.10        | -2.03      | -1.73        | -1.80      | -1.38        |
| SAMD5     | sterile alpha motif domain        | chr6q24.3            | 0                                         | ---                                        | -1.58         | -1.81           | -1.25     | 1.05        | 1.00      | -1.10       | -1.21      | -1.12        | -1.68      | -1.60        | -2.11      | -1.86        |
| SAMD8     | sterile alpha motif domain        | chr10q22.2           | lipid metabolic process                   | ---                                        | 1.26          | 1.12            | 1.18      | 1.16        | -1.01     | 1.32        | 1.49       | 1.18         | 1.23       | 1.06         | 1.31       | 1.13         |
| SAMD8     | sterile alpha motif domain        | chr10q22.2           | lipid metabolic process                   | ---                                        | 1.12          | 1.08            | 1.09      | -1.01       | -1.03     | 1.06        | -1.08      | -1.07        | 1.05       | 1.31         | 1.20       | 1.17         |
| SAMD9     | sterile alpha motif domain        | chr7q21.2            | 0                                         | ---                                        | -1.00         | -1.04           | -1.07     | -1.16       | 1.04      | -1.04       | 1.32       | 1.33         | -1.74      | -2.08        | -2.33      | -2.97        |
| SAMD9     | sterile alpha motif domain        | chr7q21.2            | 0                                         | ---                                        | 1.13          | 1.19            | -1.23     | -1.18       | -1.31     | -1.28       | 1.13       | -1.07        | -1.24      | -1.60        | -1.73      | -4.07        |
| SAMD9L    | sterile alpha motif domain        | chr7q21.2            | 0                                         | ---                                        | 1.13          | 1.47            | -1.03     | 1.09        | 1.17      | 1.22        | 1.45       | 1.64         | -1.84      | -2.33        | -2.95      | -3.82        |
| SAMHD1    | SAM domain and HD domain          | chr20pter-q12        | immune response                           | ---                                        | -1.14         | -1.06           | 1.08      | -1.07       | 1.24      | 1.09        | 1.13       | -1.03        | -1.22      | -1.31        | -1.44      | -1.54        |
| SAMHD1    | SAM domain and HD domain          | chr20pter-q12        | immune response                           | ---                                        | -1.02         | 1.06            | 1.08      | -1.12       | 1.13      | 1.24        | 1.05       | 1.26         | -1.57      | -1.29        | -2.13      | -2.31        |
| SAMHD1    | SAM domain and HD domain          | chr20pter-q12        | immune response                           | ---                                        | 1.17          | 1.05            | 1.10      | 1.19        | -1.01     | 1.04        | 1.19       | 1.31         | -1.09      | -1.23        | -1.64      | -1.67        |
| SAMHD1    | SAM domain and HD domain          | chr20pter-q12        | immune response                           | ---                                        | 1.05          | -1.00           | 1.09      | 1.10        | -1.10     | -1.11       | 1.12       | 1.25         | -1.19      | -1.20        | -1.91      | -1.75        |
| SAMM50    | sorting and assembly machinery    | chr22q13.31          | protein targeting to mitochondrion        | ---                                        | -1.03         | -1.00           | -1.02     | 1.06        | 1.01      | -1.11       | 1.08       | 1.11         | 1.03       | -1.23        | 1.05       | 1.04         |
| SAMSN1    | SAM domain, SH3 domain            | chr21q11             | negative regulation of adaptive immune    | ---                                        | 2.70          | 6.23            | -1.95     | 1.61        | -1.13     | -4.76       | 1.16       | 1.76         | 3.22       | 3.26         | 11.17      | 5.35         |
| SAP18     | Sin3A-associated protein          | chr13q12.11          | transcription, DNA-dependent              | ---                                        | -1.01         | 1.05            | -1.03     | -1.04       | 1.00      | -1.04       | 1.00       | -1.09        | 1.05       | 1.06         | 1.22       | 1.12         |

| ID          | Gene Title                   | Chromosomal Location | 1st Gene Ontology Biological Process      | Pathway                             | A2497 30 mins | A2497P' 30 mins | A2497 2 h | A2497P' 2 h | A2497 4 h | A2497P' 4 h | A2497 24 h | A2497P' 24 h | A2497 48 h | A2497P' 48 h | A2497 72 h | A2497P' 72 h |
|-------------|------------------------------|----------------------|-------------------------------------------|-------------------------------------|---------------|-----------------|-----------|-------------|-----------|-------------|------------|--------------|------------|--------------|------------|--------------|
| SAP18       | Sin3A-associated protein, 1  | chr13q12.11          | transcription, DNA-dependent              | ---                                 | -1.10         | -1.05           | 1.03      | 1.07        | 1.04      | -1.03       | -1.07      | -1.05        | -1.20      | -1.21        | -1.27      | -1.14        |
| SAP30BP     | SAP30 binding protein        | chr17q25.1           | transcription, DNA-dependent              | ---                                 | -1.10         | -1.14           | 1.05      | 1.10        | 1.12      | 1.03        | 1.23       | 1.11         | 1.33       | 1.15         | 1.27       | 1.41         |
| SAP30L      | SAP30-like                   | chr5q33.2            | transcription, DNA-dependent              | ---                                 | -1.11         | 2.19            | 1.04      | 1.02        | -1.00     | 1.04        | -1.11      | 1.18         | 1.61       | 1.85         | 2.46       | 1.63         |
| SAP30L      | SAP30-like                   | chr5q33.2            | transcription, DNA-dependent              | ---                                 | -1.08         | -1.09           | -1.04     | -1.05       | -1.04     | 1.07        | -1.40      | -1.15        | -2.67      | -2.89        | -2.36      | -2.43        |
| SARIA       | SAR1 homolog A (S. cerev)    | chr10q22.1           | GTP catabolic process                     | ---                                 | -1.01         | 1.05            | 1.11      | 1.02        | 1.14      | -1.12       | 1.67       | 1.17         | 1.46       | 1.25         | 1.70       | 1.40         |
| SARIA       | SAR1 homolog A (S. cerev)    | chr10q22.1           | GTP catabolic process                     | ---                                 | -1.06         | -1.09           | -1.06     | -1.07       | 1.03      | -1.05       | 1.27       | 1.14         | 1.61       | 1.52         | 1.80       | 1.90         |
| SAR1B       | SAR1 homolog B (S. cerev)    | chr5q31.1            | antigen processing and presentation of pe | ---                                 | 1.00          | 1.10            | 1.01      | -1.05       | -1.22     | -1.03       | -1.02      | -1.15        | 1.46       | 1.37         | 1.18       | 1.03         |
| SAR1B       | SAR1 homolog B (S. cerev)    | chr5q31.1            | antigen processing and presentation of pe | ---                                 | 1.05          | 1.06            | -1.00     | -1.21       | 1.03      | -1.07       | -1.22      | -1.09        | 1.05       | 1.08         | 1.91       | 1.46         |
| SAR1B       | SAR1 homolog B (S. cerev)    | chr5q31.1            | antigen processing and presentation of pe | ---                                 | -1.02         | -1.03           | -1.06     | -1.00       | -1.03     | -1.06       | 1.03       | 1.06         | 1.27       | 1.21         | 1.45       | 1.49         |
| SARM1       | sterile alpha and TIR motif  | chr17q11             | toll-like receptor signaling pathway      | ---                                 | -1.22         | -1.27           | 1.05      | 1.14        | -1.03     | -1.21       | -1.28      | -1.13        | -1.86      | -1.42        | -1.61      | -1.50        |
| SARM1       | sterile alpha and TIR motif  | chr17q11             | toll-like receptor signaling pathway      | ---                                 | -1.06         | -1.09           | -1.03     | 1.15        | -1.02     | 1.00        | 1.18       | 1.20         | -1.71      | -1.49        | -1.99      | -1.72        |
| SARNP       | SAP domain containing rib    | chr12q13.2           | transcription, DNA-dependent              | ---                                 | -1.08         | 1.02            | 1.02      | -1.14       | -1.04     | -1.05       | 1.02       | 1.02         | 1.12       | 1.01         | 1.27       | 1.29         |
| SARS        | seryl-tRNA synthetase        | chr1p13.3            | translation                               | ---                                 | 1.14          | 1.01            | -1.03     | -1.18       | -1.09     | 1.07        | -1.30      | -1.19        | -1.66      | -1.35        | -1.16      | -1.32        |
| SART3       | squamous cell carcinoma at   | chr12q24.1           | RNA processing                            | ---                                 | -1.10         | -1.10           | 1.11      | 1.05        | 1.18      | 1.01        | 1.26       | 1.09         | 1.24       | 1.08         | 1.20       | 1.07         |
| SASH1       | SAM and SH3 domain cont      | chr6q24.3            | 0                                         | ---                                 | -1.17         | -1.01           | 1.20      | -1.18       | -1.02     | 1.01        | -1.11      | -1.02        | 1.21       | 1.27         | 1.40       | 1.39         |
| SASH1       | SAM and SH3 domain cont      | chr6q24.3            | 0                                         | ---                                 | -1.35         | -1.06           | 1.15      | -1.08       | 1.23      | 1.30        | 1.05       | 1.08         | 1.29       | 1.21         | 1.45       | 1.42         |
| SAT1        | spermidine/spermine N1-ac    | chrXp22.1            | angiogenesis                              | Nucleotide_Metabolism // GenMAPP    | 1.08          | 1.11            | -1.06     | 1.05        | 1.06      | 1.15        | 1.30       | 1.04         | 2.78       | 2.38         | 3.25       | 2.78         |
| SAT1        | spermidine/spermine N1-ac    | chrXp22.1            | angiogenesis                              | Nucleotide_Metabolism // GenMAPP    | 1.33          | 1.10            | -1.05     | 1.12        | 1.00      | 1.22        | 1.16       | 1.14         | 2.27       | 2.23         | 2.50       | 2.03         |
| SAT1        | spermidine/spermine N1-ac    | chrXp22.1            | angiogenesis                              | Nucleotide_Metabolism // GenMAPP    | -1.04         | -1.08           | -1.02     | 1.06        | 1.13      | 1.06        | 1.55       | 1.21         | 2.73       | 2.32         | 3.05       | 2.65         |
| SATB1       | SATB homeobox 1              | chr3p23              | negative regulation of transcription from | ---                                 | 1.03          | -1.50           | -1.01     | -1.12       | 1.42      | 1.36        | -1.33      | -1.10        | -1.71      | -1.33        | -2.25      | -2.04        |
| SAV1        | salvador homolog 1 (Droso)   | chr14q13-q23         | hair follicle development                 | ---                                 | 1.34          | 1.20            | 1.06      | 1.22        | 1.02      | 1.31        | -1.05      | 1.10         | 1.70       | 1.66         | 1.74       | 1.80         |
| SAV1        | salvador homolog 1 (Droso)   | chr14q13-q23         | hair follicle development                 | ---                                 | 1.03          | 1.10            | 1.05      | 1.05        | 1.04      | 1.11        | 1.08       | 1.10         | 1.84       | 1.83         | 2.16       | 1.79         |
| SAV1        | salvador homolog 1 (Droso)   | chr14q13-q23         | hair follicle development                 | ---                                 | -1.28         | -1.03           | -1.08     | -1.08       | -1.21     | -1.10       | 1.03       | 1.09         | 1.49       | 1.63         | 1.90       | 1.62         |
| SAV1        | salvador homolog 1 (Droso)   | chr14q13-q23         | hair follicle development                 | ---                                 | 1.05          | 1.08            | 1.17      | 1.16        | -1.01     | 1.14        | 1.18       | -1.02        | 1.25       | 1.49         | 1.19       | 1.01         |
| SAYS1       | SAYS1VFN motif domain        | chr6p21.2            | 0                                         | ---                                 | 1.07          | -1.03           | -1.03     | -1.09       | 1.09      | 1.08        | 1.02       | -1.06        | -1.47      | -1.32        | -1.25      | -1.02        |
| SAYS1       | SAYS1VFN motif domain        | chr6p21.2            | 0                                         | ---                                 | 1.09          | 1.21            | 1.12      | 1.04        | -1.17     | -1.35       | -1.02      | 1.08         | -1.20      | -1.64        | -1.37      | -1.57        |
| SBDS // SBE | Shwachman-Bodian-Diam        | chr7q11.21 // chr7q  | inner cell mass cell proliferation        | ---                                 | -1.03         | -1.03           | -1.08     | -1.02       | 1.04      | -1.01       | 1.06       | 1.17         | 1.33       | 1.09         | 1.35       | 1.40         |
| SBF2        | SET binding factor 2         | chr11p15.4           | dephosphorylation                         | ---                                 | 1.05          | 1.03            | 1.06      | -1.13       | -1.01     | -1.00       | 1.04       | -1.29        | 1.30       | 1.40         | 1.14       | 1.13         |
| SBK1        | SH3-binding domain kinase    | chr16p11.2           | protein phosphorylation                   | ---                                 | 1.68          | -2.81           | 1.55      | -1.83       | -1.74     | -1.54       | -4.84      | -2.08        | -1.24      | -1.63        | 1.57       | -1.84        |
| SBK1        | SH3-binding domain kinase    | chr16p11.2           | protein phosphorylation                   | ---                                 | -1.22         | 1.03            | 1.23      | 1.29        | 1.43      | 2.01        | 1.11       | 1.04         | 1.16       | 1.11         | -1.25      | -1.43        |
| SBNO1       | strawberry notch homolog     | chr12q24.31          | regulation of transcription, DNA-depend   | ---                                 | -1.07         | 1.50            | -1.50     | -1.33       | 1.34      | 1.36        | 1.28       | 1.53         | 1.49       | 1.27         | -1.02      | 1.19         |
| SBNO2       | strawberry notch homolog     | chr19p13.3           | macrophage activation involved in immu    | ---                                 | -1.04         | 1.12            | 1.03      | 1.03        | 1.08      | -1.05       | 1.20       | 1.26         | 2.74       | 2.32         | 2.20       | 2.14         |
| SBSPON      | somatostatin B and thromb    | chr8q21.11           | immune response                           | ---                                 | 1.01          | -1.39           | 1.23      | 1.76        | -1.06     | -1.18       | 1.51       | 1.23         | -1.47      | -1.43        | 7.71       | 8.49         |
| SCSD        | sterol-C5-desaturase         | chr11q23.3           | lipid metabolic process                   | Cholesterol_Biosynthesis // GenMAPP | 1.15          | 1.17            | -1.01     | -1.16       | -1.16     | -1.05       | -1.37      | -1.26        | -1.28      | -1.30        | 1.45       | 1.17         |
| SCSD        | sterol-C5-desaturase         | chr11q23.3           | lipid metabolic process                   | Cholesterol_Biosynthesis // GenMAPP | 1.17          | -1.18           | 2.71      | 3.44        | 1.00      | -1.21       | -3.76      | -3.43        | 1.46       | 2.21         | 4.35       | 5.88         |
| SCAF1       | SR-related CTD-associated    | chr19q13.3-q13.4     | transcription from RNA polymerase II pe   | ---                                 | 1.05          | -1.09           | 1.12      | 1.14        | 1.17      | 1.03        | 1.15       | 1.05         | 1.36       | -1.02        | 1.46       | 1.59         |
| SCAF11      | SR-related CTD-associated    | chr12q12             | spliceosomal complex assembly             | Apoptosis_KEGG // GenMAPP           | 1.05          | 1.05            | -1.01     | -1.00       | -1.22     | -1.03       | -1.09      | -1.21        | 1.19       | 1.03         | 1.01       | 1.03         |
| SCAF11      | SR-related CTD-associated    | chr12q12             | spliceosomal complex assembly             | Apoptosis_KEGG // GenMAPP           | 1.17          | 1.25            | 1.01      | -1.04       | 1.10      | 1.18        | -1.07      | -1.01        | -1.29      | -1.19        | -1.53      | -1.49        |
| SCAF11      | SR-related CTD-associated    | chr12q12             | spliceosomal complex assembly             | Apoptosis_KEGG // GenMAPP           | 1.09          | -1.04           | 1.14      | 1.40        | 1.03      | 1.35        | -1.13      | -1.04        | -1.26      | -1.30        | -1.82      | -1.25        |
| SCAF4       | SR-related CTD-associated    | chr21q22.1           | 0                                         | ---                                 | 1.48          | 1.01            | 1.19      | 1.04        | 1.00      | 1.21        | 1.09       | -1.14        | -3.09      | -2.32        | -1.82      | -1.20        |
| SCAF4       | SR-related CTD-associated    | chr21q22.1           | mRNA processing                           | ---                                 | 1.06          | 1.06            | -1.00     | -1.12       | 1.19      | 1.07        | -1.08      | -1.03        | -1.06      | -1.15        | 1.35       | 1.18         |
| SCAF4       | SR-related CTD-associated    | chr21q22.1           | 0                                         | ---                                 | 1.54          | 1.28            | 1.07      | 1.02        | 1.13      | 1.16        | -1.34      | -1.43        | -2.58      | -2.03        | -2.63      | -2.51        |
| SCAF4       | SR-related CTD-associated    | chr21q22.1           | 0                                         | ---                                 | 2.17          | 1.22            | 1.28      | 1.32        | -1.43     | -1.28       | 2.23       | 1.51         | 1.40       | 1.18         | -1.22      | -1.47        |
| SCAF8       | SR-related CTD-associated    | chr6q25.1-q25.3      | transcription from RNA polymerase II pe   | ---                                 | 1.36          | 1.19            | 1.14      | 1.09        | -1.02     | 1.25        | -1.10      | -1.10        | -1.59      | -1.35        | -1.05      | -1.29        |
| SCAI        | suppressor of cancer cell in | chr9q33.3            | transcription, DNA-dependent              | ---                                 | 1.32          | 1.15            | -1.10     | -1.32       | 1.57      | 1.56        | -1.27      | -1.30        | -1.51      | -1.13        | 1.13       | 1.16         |
| SCAI        | suppressor of cancer cell in | chr9q33.3            | transcription, DNA-dependent              | ---                                 | 1.09          | 1.04            | 1.22      | 1.04        | -1.06     | 1.12        | -1.16      | -1.02        | -1.48      | -1.15        | -1.56      | -1.58        |
| SCAI        | suppressor of cancer cell in | chr9q33.3            | transcription, DNA-dependent              | ---                                 | -1.18         | 1.04            | 1.16      | 1.13        | 1.36      | 1.11        | 1.22       | -1.01        | 1.58       | 1.43         | 1.55       | 1.32         |
| SCAMP1      | secretory carrier membrane   | chr5q14.1            | transport                                 | ---                                 | -1.04         | -1.00           | -1.04     | 1.05        | -1.04     | 1.02        | 1.03       | -1.03        | -1.03      | -1.00        | -1.06      | -1.05        |
| SCAMP3      | secretory carrier membrane   | chr1q21              | transport                                 | ---                                 | -1.08         | -1.08           | -1.05     | 1.04        | 1.02      | -1.07       | 1.07       | 1.09         | 1.25       | 1.12         | 1.35       | 1.40         |
| SCAMP5      | secretory carrier membrane   | chr15q24.2           | transport                                 | ---                                 | -1.37         | -1.60           | 1.27      | 1.51        | -1.43     | -1.86       | -1.11      | 1.20         | -2.28      | -1.57        | -1.19      | -1.41        |
| SCAMPER     | sphingolipid Ca2+ release r  | ---                  | 0                                         | ---                                 | 1.05          | 2.29            | 9.84      | 5.27        | -1.37     | 1.14        | 1.36       | -3.09        | 4.47       | -1.88        | -1.02      | -3.47        |
| SCAND1      | SCAN domain containing 1     | chr20q11.1-q11.23    | transcription, DNA-dependent              | ---                                 | 1.01          | -1.10           | 1.01      | 1.13        | 1.13      | 1.02        | -1.09      | -1.04        | -1.29      | -1.29        | -1.00      | -1.12        |
| SCAND2P     | SCAN domain containing 2     | chr15q25.2           | regulation of transcription, DNA-depend   | ---                                 | -1.03         | 1.02            | 1.02      | -1.10       | -1.21     | -1.16       | -1.15      | 1.05         | -2.03      | -2.09        | -2.41      | -1.60        |
| SCAND2P     | SCAN domain containing 2     | chr15q25.2           | regulation of transcription, DNA-depend   | ---                                 | 1.19          | 1.23            | 1.12      | 1.16        | -1.08     | -1.07       | 1.01       | 1.18         | -1.46      | -1.21        | -1.56      | -1.23        |
| SCAND3      | SCAN domain containing 3     | chr6p22.1            | regulation of transcription, DNA-depend   | ---                                 | -1.10         | -1.08           | 1.20      | -1.26       | 1.13      | 1.36        | -1.48      | -1.24        | -2.91      | -1.72        | -1.57      | -1.47        |
| SCARA3      | scavenger receptor class A,  | chr8p21              | response to oxidative stress              | ---                                 | 1.22          | 1.10            | 1.00      | 1.17        | -1.08     | -1.08       | 1.05       | 1.09         | -1.49      | -1.62        | -1.87      | -1.69        |
| SCARB1      | scavenger receptor class B,  | chr12q24.31          | endothelial cell proliferation            | Statin_Pathway_PharmGKB // GenMAPP  | -1.12         | -1.14           | 1.01      | 1.08        | 1.09      | -1.02       | 1.28       | 1.25         | 1.42       | 1.43         | 1.64       | 2.06         |
| SCARB1      | scavenger receptor class B,  | chr12q24.31          | endothelial cell proliferation            | Statin_Pathway_PharmGKB // GenMAPP  | -1.09         | -1.13           | 1.00      | 1.06        | 1.07      | 1.01        | 1.18       | 1.20         | 1.36       | 1.43         | 1.61       | 2.04         |
| SCARB1      | scavenger receptor class B,  | chr12q24.31          | endothelial cell proliferation            | Statin_Pathway_PharmGKB // GenMAPP  | -1.00         | -1.01           | -1.34     | -1.22       | -1.11     | -1.26       | -1.02      | -1.01        | 1.27       | 1.28         | 1.92       | 2.38         |
| SCARB1      | scavenger receptor class B,  | chr12q24.31          | endothelial cell proliferation            | Statin_Pathway_PharmGKB // GenMAPP  | 1.14          | 1.31            | 1.05      | -1.10       | -1.44     | 1.28        | 1.15       | 1.19         | -1.09      | 1.42         | 1.47       | -1.05        |
| SCARB2      | scavenger receptor class B,  | chr4q21.1            | protein targeting to lysosome             | ---                                 | 1.12          | 1.14            | -1.12     | 1.13        | -1.00     | 1.21        | -1.16      | -1.10        | 1.23       | -1.01        | 1.50       | 1.17         |
| SCARNA17    | NULL                         | ---                  | 0                                         | ---                                 | 1.99          | 1.26            | -1.46     | -1.33       | -1.17     | -1.56       | 2.00       | 1.05         | -1.56      | -1.74        | -3.64      | -3.03        |
| SCARNA2     | small Cajal body-specific R  | chr1q13.1            | 0                                         | ---                                 | -1.24         | 2.70            | -2.62     | -1.59       | 1.96      | 1.83        | 1.12       | 1.28         | -1.10      | -1.14        | 1.04       | 1.45         |
| SCCPDH      | saccharopine dehydrogenas    | chr1q44              | oxidation-reduction process               | ---                                 | -1.11         | -1.09           | -1.02     | -1.05       | 1.05      | 1.06        | 1.03       | -1.01        | -1.40      | -1.23        | -1.26      | -1.24        |
| SCCPDH      | saccharopine dehydrogenas    | chr1q44              | oxidation-reduction process               | ---                                 | -1.23         | -1.19           | -1.06     | -1.22       | -1.02     | -1.08       | -1.27      | 1.10         | -1.63      | -1.29        | -1.63      | -1.67        |
| SCD         | stearoyl-CoA desaturase (de  | chr10q24.31          | lipid metabolic process                   | Fatty_Acid_Synthesis // GenMAPP     | -1.00         | -1.03           | 1.05      | 1.05        | 1.11      | 1.08        | 1.18       | 1.07         | 1.78       | 1.79         | 2.24       | 2.21         |

| ID           | Gene Title                  | Chromosomal Location | 1st Gene Ontology Biological Process        | Pathway                                     | A2497 30 mins | A2497P' 30 mins | A2497 2 h | A2497P' 2 h | A2497 4 h | A2497P' 4 h | A2497 24 h | A2497P' 24 h | A2497 48 h | A2497P' 48 h | A2497 72 h | A2497P' 72 h |
|--------------|-----------------------------|----------------------|---------------------------------------------|---------------------------------------------|---------------|-----------------|-----------|-------------|-----------|-------------|------------|--------------|------------|--------------|------------|--------------|
| SCD          | stearoyl-CoA desaturase (d  | chr10q24.31          | lipid metabolic process                     | Fatty_Acid_Synthesis // GenMAPP             | -1.07         | 1.01            | -1.00     | -1.03       | 1.04      | -1.05       | 1.19       | -1.02        | 1.42       | 1.17         | 1.36       | 1.35         |
| SCD          | stearoyl-CoA desaturase (d  | chr10q24.31          | lipid metabolic process                     | Fatty_Acid_Synthesis // GenMAPP             | -1.07         | -1.11           | 1.01      | 1.06        | 1.06      | 1.07        | 1.12       | 1.16         | 1.69       | 1.66         | 2.34       | 2.47         |
| SCD5         | stearoyl-CoA desaturase 5   | chr4q21.22           | lipid metabolic process                     | ---                                         | 1.06          | -1.07           | 1.10      | 1.13        | 1.11      | -1.02       | -1.09      | -1.19        | -2.13      | -1.37        | -1.68      | -1.82        |
| SCEL         | scellin                     | chr13q22             | epidermis development                       | ---                                         | -1.12         | -1.57           | -1.16     | -1.53       | -1.15     | -1.86       | 5.10       | 18.97        | -1.61      | -2.90        | 1.32       | 2.29         |
| SCFD1        | sec1 family domain contain  | chr14q12             | response to hypoxia                         | ---                                         | 1.12          | 1.05            | -1.03     | -1.02       | 1.01      | 1.08        | 1.06       | -1.03        | -1.09      | 1.08         | 1.22       | 1.27         |
| SCFD2        | sec1 family domain contain  | chr4q12              | transport                                   | ---                                         | -1.10         | -1.16           | -1.05     | 1.03        | 1.10      | 1.02        | 1.03       | 1.12         | 1.03       | 1.06         | 1.22       | 1.22         |
| SCG5         | secretogranin V (7B2 prote  | chr15q13-q14         | transport                                   | ---                                         | 1.20          | 1.05            | 1.04      | 1.07        | 1.56      | 1.25        | -1.21      | 1.23         | 1.11       | 1.11         | 4.06       | 3.63         |
| SCGB2A2      | secretoglobulin, family 2A, | chr11q13             | 0                                           | ---                                         | -1.04         | -1.47           | -2.42     | -1.20       | -1.67     | 1.63        | -4.16      | 1.68         | 2.55       | 1.57         | 3.52       | 2.47         |
| SCGB3A1      | secretoglobulin, family 3A, | chr5q35-qter         | negative regulation of cell growth          | ---                                         | 1.64          | 2.01            | -1.61     | -1.04       | -2.39     | -1.11       | -1.09      | 1.06         | 1.16       | 1.09         | -1.40      | -1.66        |
| SCGN         | secretagoin, EF-hand calc   | chr6p22.3-p22.1      | 0                                           | ---                                         | -2.03         | -1.17           | -1.31     | -1.02       | -1.77     | 1.03        | -1.07      | -2.55        | 3.40       | 2.57         | 1.10       | -1.17        |
| SCIN         | scinderin                   | chr7p21.3            | negative regulation of cell proliferation   | ---                                         | 1.30          | 1.00            | -1.01     | 1.05        | 1.11      | 1.15        | -1.35      | -1.03        | -5.08      | -2.66        | -4.36      | -6.52        |
| SCIN         | scinderin                   | chr7p21.3            | negative regulation of cell proliferation   | ---                                         | -1.07         | -1.24           | -1.13     | -1.26       | 1.04      | 1.46        | -1.14      | -1.32        | -5.15      | -3.16        | -4.88      | -4.62        |
| SCIN         | scinderin                   | chr7p21.3            | negative regulation of cell proliferation   | ---                                         | -1.34         | -1.22           | -1.22     | -1.35       | -1.10     | -1.04       | -1.21      | -1.03        | -1.81      | -1.70        | -1.93      | -1.56        |
| SCLT1        | sodium channel and clathrin | chr4q28.2            | cilium assembly                             | ---                                         | 1.37          | 1.47            | 1.06      | -1.06       | 1.07      | 1.03        | -1.07      | -1.16        | -1.80      | -2.10        | -1.73      | -1.91        |
| SCLT1        | sodium channel and clathrin | chr4q28.2            | cilium assembly                             | ---                                         | 1.16          | -1.06           | -1.24     | 1.35        | -1.10     | 1.43        | -1.38      | -1.21        | 1.03       | -1.07        | 1.66       | 1.42         |
| SCLY         | selenocysteine lyase        | chr2q37.3            | cellular amino acid metabolic process       | ---                                         | 1.07          | 1.05            | 1.12      | 1.07        | 1.09      | 1.05        | 1.36       | 1.28         | -1.21      | -1.59        | -1.78      | -1.63        |
| SCLY         | selenocysteine lyase        | chr2q37.3            | cellular amino acid metabolic process       | ---                                         | -1.09         | 1.05            | -1.05     | -1.11       | -1.01     | -1.03       | -1.16      | -1.00        | -1.76      | -1.55        | -1.43      | -1.29        |
| SCLY         | selenocysteine lyase        | chr2q37.3            | cellular amino acid metabolic process       | ---                                         | -1.19         | -1.04           | -1.05     | 1.01        | 1.16      | 1.11        | 1.08       | 1.06         | -1.16      | -1.17        | -1.89      | -1.57        |
| SCMH1        | sex comb on midleg homolo   | chr1p34              | chromatin remodeling                        | ---                                         | -1.04         | -1.06           | 1.08      | 1.24        | 1.08      | -1.07       | 1.09       | 1.24         | 1.06       | -1.03        | -1.45      | -1.39        |
| SCML1        | sex comb on midleg-like 1   | chrXp22              | transcription, DNA-dependent                | ---                                         | 1.08          | -1.01           | 1.01      | 1.04        | -1.04     | 1.07        | -1.05      | -1.13        | 1.13       | 1.25         | 1.90       | 1.81         |
| SCML1        | sex comb on midleg-like 1   | chrXp22              | transcription, DNA-dependent                | ---                                         | -1.05         | -1.11           | 1.03      | -1.08       | 1.10      | 1.14        | 1.03       | -1.02        | 1.09       | 1.08         | 1.82       | 1.62         |
| SCN1A        | sodium channel, voltage-ga  | chr2q24.3            | regulation of action potential              | ---                                         | 1.43          | 1.34            | 1.23      | 1.06        | 1.26      | 1.08        | -1.24      | 1.07         | -2.89      | -1.82        | -3.59      | -2.31        |
| SCN1A        | sodium channel, voltage-ga  | chr2q24.3            | regulation of action potential              | ---                                         | -1.19         | -1.03           | 1.24      | 1.48        | 1.15      | 1.03        | -1.02      | -1.30        | -3.24      | -1.33        | -1.12      | -1.48        |
| SCN1B        | sodium channel, voltage-ga  | chr19q13.1           | regulation of sodium ion transport          | ---                                         | -1.33         | -1.27           | 1.02      | 1.24        | 1.01      | 1.06        | 1.17       | 1.26         | 3.09       | 2.31         | 1.88       | 1.54         |
| SCN2A        | sodium channel, voltage-ga  | chr2q24.3            | regulation of action potential              | ---                                         | -1.59         | -2.71           | -6.14     | -3.18       | -3.33     | -1.56       | 10.58      | 4.49         | -3.22      | 2.25         | 4.03       | 7.92         |
| SCN2B        | sodium channel, voltage-ga  | chr11q23             | transport                                   | ---                                         | 1.17          | 3.27            | -1.55     | -3.13       | -4.30     | -2.27       | 3.82       | 1.80         | -1.58      | -1.18        | 1.77       | -2.07        |
| SCN7A        | sodium channel, voltage-ga  | chr2q21-q23          | transport                                   | ---                                         | -1.76         | 1.75            | -1.06     | -1.42       | 2.29      | 1.82        | 5.08       | 1.40         | 3.45       | 2.72         | 1.45       | -1.13        |
| SCN7A        | sodium channel, voltage-ga  | chr2q21-q23          | transport                                   | ---                                         | 2.33          | 1.28            | -1.19     | 1.97        | -1.46     | 1.16        | -1.04      | -1.27        | 3.36       | 1.84         | -1.03      | 1.41         |
| SCN8A        | sodium channel, voltage-ga  | chr12q13             | transport                                   | ---                                         | -1.64         | -1.39           | -1.60     | 1.45        | -5.73     | -3.41       | 2.48       | 1.26         | -2.36      | -1.24        | 2.57       | -1.03        |
| SCO1         | SCO1 cytochrome c oxidase   | chr17p13.1           | generation of precursor metabolites and     | Electron_Transport_Chain // GenMAPP         | -1.08         | -1.04           | -1.05     | 1.01        | 1.08      | -1.03       | 1.15       | 1.06         | 1.40       | 1.21         | 1.29       | 1.49         |
| SCP2         | sterol carrier protein 2    | chr1p32              | steroid biosynthetic process                | Mitochondrial_fatty_acid_betaoxidation // G | 1.11          | 1.17            | -1.11     | -1.22       | -1.15     | -1.03       | -1.20      | -1.09        | -1.29      | -1.08        | -1.47      | -1.67        |
| SCP2         | sterol carrier protein 2    | chr1p32              | steroid biosynthetic process                | Mitochondrial_fatty_acid_betaoxidation // G | 1.36          | 1.34            | -1.15     | -1.30       | -1.18     | -1.07       | -1.14      | -1.12        | -1.44      | -1.14        | -1.40      | -1.57        |
| SCRN1        | secernin 1                  | chr7p14.3-p14.1      | proteolysis                                 | ---                                         | 1.05          | -1.14           | -1.00     | 1.14        | 1.16      | 1.15        | 1.13       | 1.07         | -1.25      | -1.16        | -1.65      | -1.27        |
| SCRN3        | secernin 3                  | chr2q31.1            | proteolysis                                 | ---                                         | -1.11         | -1.18           | 1.19      | -1.17       | 1.30      | 1.08        | 1.02       | -1.10        | -2.09      | -1.76        | -1.86      | -1.24        |
| SCRN3        | secernin 3                  | chr2q31.1            | proteolysis                                 | ---                                         | 1.05          | 1.03            | 1.07      | 1.13        | -1.05     | 1.12        | 1.01       | 1.02         | -1.67      | -1.48        | -1.38      | -1.51        |
| SCRN3        | secernin 3                  | chr2q31.1            | proteolysis                                 | ---                                         | -1.03         | -1.02           | 1.08      | 1.04        | 1.04      | -1.01       | 1.03       | 1.32         | -2.07      | -1.57        | -2.12      | -2.33        |
| SCUBE3       | signal peptide, CUB domain  | chr6p21.3            | protein homooligomerization                 | ---                                         | 1.27          | 1.31            | 1.27      | 1.23        | -1.29     | -1.22       | -1.08      | 1.38         | -3.61      | -1.94        | -2.70      | -2.23        |
| SCYL1        | SCY1-like 1 (S. cerevisiae) | chr11q13             | transcription, DNA-dependent                | ---                                         | 1.10          | 1.25            | -1.40     | -1.27       | 1.18      | 1.10        | 1.55       | -1.54        | 1.49       | 2.05         | 2.25       | 3.16         |
| SCYL1        | SCY1-like 1 (S. cerevisiae) | chr11q13             | transcription, DNA-dependent                | ---                                         | -1.09         | -1.06           | 1.09      | 1.25        | -1.04     | -1.22       | 1.39       | 1.34         | 1.91       | 1.43         | 1.50       | 1.44         |
| SCYL2        | SCY1-like 2 (S. cerevisiae) | chr12q23.1           | positive regulation of receptor internaliza | ---                                         | -1.04         | -1.03           | 1.05      | 1.06        | 1.07      | 1.02        | 1.12       | 1.01         | 1.31       | 1.13         | 1.44       | 1.04         |
| SCYL3        | SCY1-like 3 (S. cerevisiae) | chr19q24.2           | protein phosphorylation                     | ---                                         | 1.14          | 1.04            | 1.09      | -1.07       | 1.05      | -1.01       | -1.01      | -1.22        | -1.84      | -1.94        | 1.07       | -1.08        |
| SCYL3        | SCY1-like 3 (S. cerevisiae) | chr19q24.2           | protein phosphorylation                     | ---                                         | 1.02          | 1.04            | 1.03      | -1.05       | -1.10     | -1.20       | -1.27      | -1.44        | -1.78      | -1.58        | -1.13      | -1.22        |
| SDAD1        | SDA1 domain containing 1    | chr4q21.1            | ribosomal large subunit export from nucl    | ---                                         | -1.02         | 1.05            | 1.04      | 1.02        | 1.06      | 1.01        | -1.05      | -1.10        | -1.51      | -1.54        | -1.01      | -1.10        |
| SDAD1        | SDA1 domain containing 1    | chr4q21.1            | ribosomal large subunit export from nucl    | ---                                         | -1.05         | -1.08           | -1.02     | -1.04       | -1.05     | 1.11        | -1.09      | 1.02         | -1.32      | -1.44        | 1.10       | 1.07         |
| SDAD1        | SDA1 domain containing 1    | chr4q21.1            | ribosomal large subunit export from nucl    | ---                                         | -1.08         | -1.03           | 1.09      | -1.08       | 1.18      | 1.08        | 1.07       | -1.01        | -1.42      | -1.56        | 1.01       | -1.07        |
| SDC1         | syndecan 1                  | chr2p24.1            | retinoid metabolic process                  | ---                                         | -1.00         | -1.01           | 1.00      | 1.06        | 1.09      | -1.04       | -1.08      | -1.10        | 1.11       | 1.19         | -1.05      | -1.02        |
| SDC2         | syndecan 2                  | chr8q22-q23          | retinoid metabolic process                  | ---                                         | 1.35          | 1.07            | -1.45     | -1.20       | 1.28      | -1.13       | 1.09       | -1.49        | -1.19      | -1.26        | -1.63      | -1.43        |
| SDC2         | syndecan 2                  | chr8q22-q23          | retinoid metabolic process                  | ---                                         | 1.01          | 1.01            | 1.38      | 1.36        | 1.24      | 1.03        | 1.19       | 1.08         | -1.52      | -1.05        | -1.43      | -1.30        |
| SDC4         | syndecan 4                  | chr20q12             | retinoid metabolic process                  | ---                                         | -1.01         | -1.03           | -1.01     | -1.08       | 1.02      | -1.00       | 1.64       | 1.25         | 2.35       | 1.92         | 1.35       | 1.32         |
| SDCBP2-AS1   | SDCBP2 antisense RNA 1      | ---                  | 0                                           | ---                                         | -1.11         | -1.09           | -1.01     | 1.35        | 1.01      | -1.11       | 1.41       | 1.26         | -1.87      | -1.37        | -2.31      | -2.36        |
| SDCCAG8      | serologically defined colon | chr1q43              | G2                                          | ---                                         | 1.03          | -1.19           | 1.02      | 1.33        | 1.11      | 1.11        | 1.11       | 1.08         | -1.29      | -1.45        | -1.62      | -1.52        |
| SDCCAG8      | serologically defined colon | chr1q43              | G2                                          | ---                                         | 1.07          | -1.21           | 1.22      | 1.18        | 1.46      | 1.53        | -1.09      | -1.22        | 1.66       | 1.60         | 1.83       | 2.47         |
| SDE2         | SDE2 telomere maintainanc   | chr1q42.12           | 0                                           | ---                                         | 1.37          | 1.38            | 1.12      | -1.15       | -1.08     | 1.04        | -1.34      | -1.35        | -1.12      | -1.05        | 1.46       | 1.07         |
| SDE2         | SDE2 telomere maintainanc   | chr1q42.12           | 0                                           | ---                                         | 1.23          | 1.03            | 1.02      | -1.02       | -1.02     | -1.11       | 1.51       | 1.48         | 1.74       | 1.19         | 2.91       | 2.07         |
| SDF2         | stromal cell-derived factor | chr17q11.2           | protein glycosylation                       | ---                                         | -1.05         | -1.04           | 1.01      | 1.06        | -1.09     | -1.05       | -1.13      | 1.09         | 1.03       | 1.13         | 1.14       | 1.25         |
| SDF2L1       | stromal cell-derived factor | chr22q11.21          | pyrimidine nucleobase catabolic process     | ---                                         | 1.07          | 1.04            | 1.09      | 1.19        | -1.21     | -1.32       | 1.13       | 1.34         | 2.19       | 1.70         | -1.04      | 1.21         |
| SDF4         | stromal cell derived factor | chr1p36.33           | exocytosis                                  | ---                                         | -1.14         | -1.20           | -1.06     | 1.00        | -1.08     | -1.03       | 1.02       | -1.01        | 1.15       | 1.33         | 1.10       | 1.30         |
| SDHA         | succinate dehydrogenase c   | chr5p15              | tricarboxylic acid cycle                    | Electron_Transport_Chain // GenMAPP /// 8   | -1.09         | -1.06           | 1.01      | 1.08        | 1.08      | -1.04       | 1.22       | 1.13         | 1.46       | 1.23         | 1.19       | 1.34         |
| SDHAF1       | succinate dehydrogenase c   | chr19q13.12          | iron-sulfur cluster assembly                | ---                                         | 1.04          | 1.04            | 1.15      | 1.06        | 1.05      | 1.04        | 1.13       | 1.21         | 1.22       | 1.24         | 1.14       | 1.21         |
| SDHAF1 /// S | succinate dehydrogenase c   | chr3q29              | electron transport chain                    | ---                                         | -1.22         | -1.07           | 1.01      | 1.03        | 1.22      | -1.02       | 1.43       | 1.17         | 1.91       | 1.32         | 1.20       | 1.45         |
| SDHB         | succinate dehydrogenase c   | chr1p36.1-p35        | tricarboxylic acid cycle                    | Electron_Transport_Chain // GenMAPP /// 8   | -1.00         | 1.06            | -1.00     | -1.07       | 1.04      | -1.03       | 1.04       | -1.06        | 1.28       | 1.18         | 1.17       | 1.14         |
| SDHD         | succinate dehydrogenase c   | chr11q23             | tricarboxylic acid cycle                    | Electron_Transport_Chain // GenMAPP /// 8   | -1.47         | -1.07           | -2.67     | -1.87       | 1.43      | 1.79        | -2.75      | -1.27        | -1.73      | -2.41        | 1.02       | 1.50         |
| SDK2         | sidekick cell adhesion mole | chr17q25.1           | cell adhesion                               | ---                                         | -1.56         | 1.17            | -1.33     | -1.19       | -1.44     | -1.50       | 1.76       | 1.52         | -2.94      | 1.87         | 1.51       | -1.14        |
| SDR16C5      | short chain dehydrogenase   | chr8q12.1            | metabolic process                           | ---                                         | -1.15         | -1.28           | -1.15     | -1.05       | 1.06      | 1.11        | 1.68       | 2.01         | 2.52       | 1.95         | 2.38       | 2.06         |
| SDR9C7       | short chain dehydrogenase   | chr12q13.3           | metabolic process                           | ---                                         | -1.87         | -1.15           | -1.59     | -1.95       | 1.53      | 8.33        | 4.76       | 1.69         | -1.92      | -1.92        | -1.87      | -1.52        |
| SDSL         | serine dehydratase-like     | chr12q24.13          | cellular amino acid metabolic process       | ---                                         | -1.04         | -1.03           | -1.17     | 1.11        | 1.48      | 1.25        | -1.99      | -1.35        | 1.25       | 1.09         | -2.09      | -1.41        |

| ID         | Gene Title                                      | Chromosomal Location | 1st Gene Ontology Biological Process                                 | Pathway | A2497 30 mins | A2497P' 30 mins | A2497 2 h | A2497P' 2 h | A2497 4 h | A2497P' 4 h | A2497 24 h | A2497P' 24 h | A2497 48 h | A2497P' 48 h | A2497 72 h | A2497P' 72 h |
|------------|-------------------------------------------------|----------------------|----------------------------------------------------------------------|---------|---------------|-----------------|-----------|-------------|-----------|-------------|------------|--------------|------------|--------------|------------|--------------|
| SEC11C     | SEC11 homolog C (S. cerevisiae)                 | chr18q21.32          | energy reserve metabolic process                                     | ---     | -1.09         | -1.05           | 1.02      | 1.06        | -1.02     | -1.05       | 1.09       | 1.07         | -1.01      | -1.08        | -1.45      | -1.46        |
| SEC13      | SEC13 homolog (S. cerevisiae)                   | chr3p25-p24          | M phase of mitotic cell cycle                                        | ---     | -1.20         | -1.09           | 1.00      | -1.05       | 1.13      | -1.14       | 1.17       | 1.05         | 1.79       | 1.40         | 1.57       | 1.75         |
| SEC14L1    | SEC14-like 1 (S. cerevisiae)                    | chr17q25.2           | transport                                                            | ---     | -1.06         | -1.17           | -1.16     | -1.03       | -1.06     | -1.17       | 1.44       | 1.33         | -1.17      | -1.52        | 1.12       | -1.20        |
| SEC16A     | SEC16 homolog A (S. cerevisiae)                 | chr9q34.3            | transport                                                            | ---     | -1.00         | -1.04           | -1.01     | 1.06        | -1.01     | 1.09        | -1.02      | -1.05        | 1.25       | 1.22         | 1.23       | 1.41         |
| SEC22A     | SEC22 vesicle trafficking                       | chr3q21.1            | transport                                                            | ---     | 1.13          | 1.14            | 1.01      | 1.03        | -1.10     | -1.05       | -1.20      | -1.16        | -1.18      | -1.31        | -1.58      | -2.17        |
| SEC22A     | SEC22 vesicle trafficking                       | chr3q21.1            | transport                                                            | ---     | 1.16          | 1.07            | -1.06     | 1.09        | -1.12     | 1.13        | -1.23      | -1.17        | -1.02      | -1.15        | -1.04      | -1.09        |
| SEC22B     | SEC22 vesicle trafficking                       | chr1q21.1            | transport                                                            | ---     | 1.14          | 1.13            | 1.01      | -1.05       | -1.38     | 1.09        | 1.03       | -1.08        | -1.51      | -1.02        | 1.01       | -1.09        |
| SEC22B     | SEC22 vesicle trafficking                       | chr1q21.1            | ER to Golgi vesicle-mediated transport                               | ---     | 1.09          | 1.11            | -1.01     | -1.01       | -1.12     | -1.02       | -1.17      | -1.03        | -1.30      | -1.16        | 1.03       | -1.04        |
| SEC22C     | SEC22 vesicle trafficking                       | chr3p22.1            | transport                                                            | ---     | 1.02          | -1.02           | 1.07      | 1.09        | -1.04     | -1.01       | 1.13       | 1.05         | -1.30      | -1.50        | -1.32      | -1.54        |
| SEC22C     | SEC22 vesicle trafficking                       | chr3p22.1            | transport                                                            | ---     | 1.11          | 1.01            | 1.25      | 1.31        | -1.10     | -1.01       | 1.12       | 1.24         | -1.51      | -1.42        | -2.28      | -1.83        |
| SEC22C     | SEC22 vesicle trafficking                       | chr3p22.1            | transport                                                            | ---     | 1.30          | 1.06            | 1.65      | 1.41        | 1.09      | 1.26        | -1.24      | -1.01        | -2.87      | -2.26        | -2.54      | -2.55        |
| SEC22C     | SEC22 vesicle trafficking                       | chr3p22.1            | transport                                                            | ---     | -1.36         | -1.51           | 1.19      | -1.08       | -1.03     | 1.13        | 1.25       | 1.11         | -1.64      | -1.54        | -1.80      | -1.93        |
| SEC23A     | Sec23 homolog A (S. cerevisiae)                 | chr14q21.1           | antigen processing and presentation of peptide                       | ---     | 1.24          | 1.56            | 1.32      | 1.26        | -1.11     | 1.15        | -1.23      | -1.18        | 1.34       | 1.27         | 1.18       | 1.49         |
| SEC23B     | Sec23 homolog B (S. cerevisiae)                 | chr20p11.23          | transport                                                            | ---     | -1.02         | -1.05           | -1.04     | -1.03       | -1.06     | -1.01       | 1.01       | 1.00         | 1.19       | 1.30         | 1.12       | 1.18         |
| SEC23B     | Sec23 homolog B (S. cerevisiae)                 | chr20p11.23          | transport                                                            | ---     | -1.12         | -1.04           | 1.00      | 1.06        | 1.19      | -1.00       | 1.19       | -1.05        | 1.58       | 1.23         | 1.49       | 1.51         |
| SEC23IP    | SEC23 interacting protein                       | chr10q25-q26         | intracellular protein transport                                      | ---     | 1.08          | 1.08            | 1.02      | -1.11       | 1.03      | 1.04        | -1.08      | -1.10        | -1.97      | -1.70        | -1.02      | -1.11        |
| SEC23IP    | SEC23 interacting protein                       | chr10q25-q26         | intracellular protein transport                                      | ---     | -1.16         | -1.11           | -1.05     | -1.05       | 1.01      | -1.07       | -1.06      | -1.12        | -1.62      | -1.58        | 1.17       | 1.31         |
| SEC23IP    | SEC23 interacting protein                       | chr10q25-q26         | intracellular protein transport                                      | ---     | 1.04          | 1.02            | 1.04      | 1.01        | -1.10     | 1.10        | -1.46      | -1.11        | -1.61      | -1.44        | -1.14      | -1.17        |
| SEC24A     | SEC24 family, member A (S. cerevisiae)          | chr5q31.1            | antigen processing and presentation of peptide                       | ---     | -1.01         | 1.10            | 1.09      | 1.01        | 1.06      | 1.00        | 1.36       | 1.05         | 1.77       | 1.79         | 2.32       | 2.09         |
| SEC24A     | SEC24 family, member A (S. cerevisiae)          | chr5q31.1            | antigen processing and presentation of peptide                       | ---     | -1.04         | -1.13           | 1.15      | 1.20        | 1.03      | 1.07        | 1.30       | 1.06         | 2.75       | 3.10         | 2.09       | 1.98         |
| SEC24B     | SEC24 family, member B (S. cerevisiae)          | chr4q25              | antigen processing and presentation of peptide                       | ---     | 1.06          | 1.07            | 1.08      | 1.03        | 1.01      | 1.09        | -1.06      | -1.09        | -1.25      | -1.02        | 1.10       | 1.01         |
| SEC24B-AS1 | SEC24B antisense RNA 1 (S. cerevisiae)          | chr4q25              | 0                                                                    | ---     | 1.38          | 1.53            | 1.14      | 1.17        | 1.08      | 1.43        | -1.29      | 1.74         | -3.07      | -2.00        | -4.20      | -3.84        |
| SEC24C     | SEC24 family, member C (S. cerevisiae)          | chr10q22.2           | antigen processing and presentation of peptide                       | ---     | -1.03         | -1.10           | -1.03     | -1.11       | 1.00      | 1.06        | 1.00       | -1.08        | 1.28       | 1.30         | 1.28       | 1.48         |
| SEC24D     | SEC24 family, member D (S. cerevisiae)          | chr4q26              | antigen processing and presentation of peptide                       | ---     | 1.55          | 1.41            | -1.07     | -1.11       | -1.14     | 1.06        | -1.25      | -1.08        | 1.79       | 1.94         | 2.11       | 1.55         |
| SEC31A     | SEC31 homolog A (S. cerevisiae)                 | chr4q21.22           | antigen processing and presentation of peptide                       | ---     | 1.10          | 1.19            | 1.09      | 1.10        | -1.04     | 1.01        | -1.20      | 1.11         | -1.11      | 1.00         | 1.24       | 1.17         |
| SEC31A     | SEC31 homolog A (S. cerevisiae)                 | chr4q21.22           | antigen processing and presentation of peptide                       | ---     | 1.02          | 1.03            | 1.01      | -1.07       | 1.09      | 1.04        | -1.02      | 1.14         | -1.00      | -1.03        | 1.44       | 1.33         |
| SEC31B     | SEC31 homolog B (S. cerevisiae)                 | chr10q24.31          | transport                                                            | ---     | -1.10         | 1.16            | 1.06      | 1.61        | 1.07      | 1.04        | 1.07       | 1.03         | -1.06      | -1.10        | -2.22      | -1.23        |
| SEC61A1    | Sec61 alpha 1 subunit (S. cerevisiae)           | chr3q21.3            | antigen processing and presentation of peptide                       | ---     | -1.06         | -1.16           | 1.05      | 1.04        | 1.17      | 1.07        | 1.05       | -1.01        | 1.22       | 1.08         | 1.14       | 1.37         |
| SEC61A1    | Sec61 alpha 1 subunit (S. cerevisiae)           | chr3q21.3            | antigen processing and presentation of peptide                       | ---     | -1.03         | 1.07            | 1.02      | -1.09       | 1.03      | 1.00        | -1.06      | -1.09        | 1.17       | 1.01         | 1.40       | 1.37         |
| SEC61A2    | Sec61 alpha 2 subunit (S. cerevisiae)           | chr10p14             | antigen processing and presentation of peptide                       | ---     | 1.06          | 1.01            | -1.02     | 1.09        | 1.11      | 1.04        | -1.05      | 1.32         | -1.27      | -1.01        | 1.29       | 1.36         |
| SEC61G     | Sec61 gamma subunit (S. cerevisiae)             | chr7p11.2            | antigen processing and presentation of peptide                       | ---     | -1.07         | 1.02            | -1.02     | -1.16       | -1.05     | -1.14       | 1.12       | 1.04         | 1.64       | 1.28         | 1.66       | 1.46         |
| SEC62      | SEC62 homolog (S. cerevisiae)                   | chr3q26.2            | cotranslational protein targeting to membrane                        | ---     | -1.08         | 1.02            | -1.02     | -1.04       | 1.00      | -1.06       | 1.04       | 1.03         | 1.00       | -1.03        | 1.24       | 1.12         |
| SEC62      | SEC62 homolog (S. cerevisiae)                   | chr3q26.2            | cotranslational protein targeting to membrane                        | ---     | -1.03         | 1.01            | 1.02      | -1.01       | 1.03      | 1.04        | -1.02      | -1.00        | -1.20      | -1.04        | 1.01       | -1.06        |
| SEC63      | SEC63 homolog (S. cerevisiae)                   | chr6p21              | liver development                                                    | ---     | 1.92          | 3.63            | -1.07     | 1.20        | 1.95      | 1.92        | -1.09      | -2.17        | -1.03      | 2.22         | 3.30       | 9.11         |
| SECTM1     | secreted and transmembrane protein              | chr17q25             | immune response                                                      | ---     | -1.02         | -1.01           | -1.02     | -1.04       | -1.01     | -1.19       | 1.36       | 1.36         | -1.37      | -1.42        | -1.36      | -1.04        |
| SEH1L      | SEH1-like (S. cerevisiae)                       | chr18p11.21          | M phase of mitotic cell cycle                                        | ---     | 1.10          | 1.09            | -1.03     | -1.20       | -1.16     | -1.10       | -1.14      | -1.10        | -1.12      | -1.15        | 1.79       | 1.19         |
| SEH1L      | SEH1-like (S. cerevisiae)                       | chr18p11.21          | M phase of mitotic cell cycle                                        | ---     | 1.08          | 1.09            | -1.19     | -1.13       | -1.15     | 1.13        | -1.19      | -1.06        | -1.96      | -1.52        | -1.60      | -1.66        |
| SEL1L      | sel-1 suppressor of lin-12 (S. cerevisiae)      | chr14q31             | Notch signaling pathway                                              | ---     | -1.47         | -1.90           | -1.13     | -1.09       | 1.42      | 1.14        | -1.02      | -1.23        | -1.22      | -1.11        | -1.04      | 1.48         |
| SEL1L      | sel-1 suppressor of lin-12 (S. cerevisiae)      | chr14q31             | Notch signaling pathway                                              | ---     | -1.05         | -1.02           | -1.08     | -1.03       | -1.01     | 1.03        | -1.08      | -1.04        | -1.16      | -1.02        | -1.10      | -1.00        |
| SEL1L3     | sel-1 suppressor of lin-12 (S. cerevisiae)      | chr4p15.2            | 0                                                                    | ---     | 1.10          | 1.03            | 1.01      | 1.10        | -1.04     | -1.01       | 1.09       | 1.09         | 1.09       | 1.18         | 1.16       | 1.50         |
| SEL1L3     | sel-1 suppressor of lin-12 (S. cerevisiae)      | chr4p15.2            | 0                                                                    | ---     | -1.06         | -1.14           | -1.04     | -1.08       | 1.05      | 1.13        | -1.04      | -1.05        | 1.15       | 1.33         | 1.25       | 1.40         |
| SEL1L3     | sel-1 suppressor of lin-12 (S. cerevisiae)      | chr4p15.2            | 0                                                                    | ---     | 1.07          | 1.11            | -1.02     | -1.01       | 1.22      | -1.01       | -1.01      | -1.03        | 1.30       | 1.60         | 1.37       | 1.33         |
| SELENBP1   | selenium binding protein 1 (S. cerevisiae)      | chr1q21.3            | transport                                                            | ---     | -1.08         | -1.08           | 1.03      | 1.08        | 1.02      | -1.05       | -1.01      | 1.01         | -1.37      | -1.10        | -2.14      | -1.62        |
| SELM       | selenoprotein M (S. cerevisiae)                 | chr22q12.2           | 0                                                                    | ---     | -1.24         | -1.63           | -1.08     | -1.10       | 1.13      | 1.03        | -1.21      | -1.06        | 1.04       | 1.02         | 1.21       | 1.37         |
| SELO       | selenoprotein O (S. cerevisiae)                 | chr22q13.33          | 0                                                                    | ---     | -1.05         | -1.23           | 1.27      | 1.68        | 1.23      | -1.04       | 1.16       | 1.15         | 1.67       | 1.31         | 1.59       | 1.95         |
| SELO       | selenoprotein O (S. cerevisiae)                 | chr22q13.33          | 0                                                                    | ---     | 1.04          | -1.12           | -1.10     | 1.23        | -1.14     | -1.12       | 1.23       | 1.14         | 2.10       | 1.55         | 1.43       | 1.56         |
| SELRC1     | Sel1 repeat containing 1 (S. cerevisiae)        | chr1p32.3            | 0                                                                    | ---     | -1.12         | -1.09           | -1.01     | 1.04        | 1.13      | 1.02        | 1.21       | 1.32         | 1.09       | -1.09        | 1.32       | 1.38         |
| SEMA3B     | sema domain, immunoglobulin-like                | chr3p21.3            | cell-cell signaling                                                  | ---     | -1.04         | -1.12           | 1.01      | 1.27        | 1.09      | -1.08       | 1.65       | 1.20         | 1.92       | 1.31         | 1.52       | 1.82         |
| SEMA3C     | sema domain, immunoglobulin-like                | chr7q21-q31          | neural crest cell migration                                          | ---     | 1.19          | 1.00            | -1.02     | -1.20       | -1.14     | -1.00       | -1.09      | 1.01         | -1.75      | -1.37        | -1.05      | -1.26        |
| SEMA3F     | sema domain, immunoglobulin-like                | chr3p21.3            | neural crest cell migration                                          | ---     | 1.03          | 1.10            | 1.37      | 1.23        | 1.33      | 1.38        | 1.26       | -1.09        | 2.51       | 1.71         | 2.49       | 2.24         |
| SEMA3F     | sema domain, immunoglobulin-like                | chr3p21.3            | neural crest cell migration                                          | ---     | 1.19          | 1.13            | -1.02     | -1.19       | 1.07      | 1.27        | 1.25       | 1.06         | 2.51       | 2.35         | 2.93       | 2.89         |
| SEMA3F     | sema domain, immunoglobulin-like                | chr3p21.3            | neural crest cell migration                                          | ---     | 1.23          | 1.07            | -1.10     | 1.04        | -1.19     | 1.01        | -1.04      | 1.70         | 1.52       | 1.69         | 1.69       | 1.69         |
| SEMA4B     | sema domain, immunoglobulin-like                | chr15q25             | multicellular organismal development                                 | ---     | -1.04         | 1.03            | -1.02     | -1.03       | 1.06      | -1.08       | 1.36       | 1.31         | 3.47       | 3.71         | 3.01       | 3.93         |
| SEMA4C     | sema domain, immunoglobulin-like                | chr2q11.2            | neural tube closure                                                  | ---     | -1.11         | -1.50           | 1.22      | 1.10        | 1.23      | 1.32        | -1.07      | 1.22         | 1.18       | 1.43         | 1.36       | 1.61         |
| SEMA4C     | sema domain, immunoglobulin-like                | chr2q11.2            | neural tube closure                                                  | ---     | 1.01          | 1.00            | -1.13     | -1.27       | -1.30     | 1.30        | -1.03      | -1.01        | 1.86       | 1.48         | 1.80       | 1.92         |
| SEMA4D     | sema domain, immunoglobulin-like                | chr9q22.2            | negative regulation of transcription from RNA polymerase II promoter | ---     | -1.67         | -1.23           | 1.13      | 1.61        | -1.01     | -1.78       | -1.13      | 1.03         | 1.23       | 1.04         | 2.32       | 1.99         |
| SEMA4G     | sema domain, immunoglobulin-like                | chr10q24.31          | multicellular organismal development                                 | ---     | 1.50          | 1.45            | 2.16      | 2.75        | -3.38     | -2.90       | -2.23      | 1.07         | 3.33       | 3.20         | -9.76      | -2.00        |
| SEMA4G     | sema domain, immunoglobulin-like                | chr10q24.31          | multicellular organismal development                                 | ---     | 1.06          | -1.07           | 1.16      | 1.29        | -1.74     | -1.64       | -1.85      | -1.30        | 2.12       | 1.79         | 1.50       | 1.00         |
| SEMA5A     | sema domain, seven thrombospondin type 1 motifs | chr5p15.2            | patterning of blood vessels                                          | ---     | -1.08         | -1.51           | 1.10      | 2.23        | 2.17      | 1.41        | -8.68      | -2.11        | 2.37       | 4.40         | -2.90      | -1.24        |
| SEMA6A     | sema domain, transmembrane protein              | chr5q23.1            | neuron migration                                                     | ---     | -2.77         | -1.12           | 1.52      | 1.50        | -1.60     | 1.11        | 2.13       | 4.54         | 1.28       | -1.03        | 2.46       | 2.63         |
| SEMA6A     | sema domain, transmembrane protein              | chr5q23.1            | neuron migration                                                     | ---     | 1.30          | 1.12            | 1.14      | 1.01        | 1.22      | -1.19       | 1.17       | -1.24        | 2.42       | 2.09         | 5.58       | 4.78         |
| SEMA6D     | sema domain, transmembrane protein              | chr15q21.1           | C-terminal protein lipidation                                        | ---     | -1.32         | -1.26           | 1.34      | 1.44        | 1.20      | 1.22        | 1.18       | -1.00        | -3.13      | -2.33        | -1.81      | -2.33        |
| SEMA6D     | sema domain, transmembrane protein              | chr15q21.1           | C-terminal protein lipidation                                        | ---     | 1.12          | 1.12            | 1.23      | 1.30        | 1.02      | 1.07        | -1.38      | -1.12        | -3.62      | -2.87        | -2.35      | -2.67        |
| SEMA6D     | sema domain, transmembrane protein              | chr15q21.1           | C-terminal protein lipidation                                        | ---     | 1.44          | 1.20            | -1.12     | -1.35       | 1.58      | 1.11        | 1.32       | -1.31        | -2.78      | -2.03        | -2.27      | -2.27        |
| SEMA7A     | semaphorin 7A, GPI membrane-anchored            | chr15q22.3-q23       | inflammatory response                                                | ---     | 1.32          | 1.38            | 1.49      | 1.81        | -1.05     | 1.07        | 1.31       | 1.31         | 2.11       | 1.74         | 1.47       | 1.15         |
| SEMG1      | semenogelin I (S. cerevisiae)                   | chr20q12-q13.2       | insemination                                                         | ---     | -1.80         | -1.02           | 6.55      | 6.57        | -1.21     | -2.10       | 4.58       | 2.16         | 3.32       | -2.37        | -1.11      | -2.29        |

| ID           | Gene Title                    | Chromosomal Location | 1st Gene Ontology Biological Process      | Pathway                                   | A2497 30 mins | A2497P' 30 mins | A2497 2 h | A2497P' 2 h | A2497 4 h | A2497P' 4 h | A2497 24 h | A2497P' 24 h | A2497 48 h | A2497P' 48 h | A2497 72 h | A2497P' 72 h |
|--------------|-------------------------------|----------------------|-------------------------------------------|-------------------------------------------|---------------|-----------------|-----------|-------------|-----------|-------------|------------|--------------|------------|--------------|------------|--------------|
| SEN1         | SUMO1/sentrin specific pe     | chr12q13.1           | proteolysis                               | ---                                       | -1.04         | -1.02           | 1.10      | 1.01        | -1.01     | 1.01        | -1.07      | -1.02        | -1.31      | -1.11        | -1.20      | -1.11        |
| SEN1         | SUMO1/sentrin specific pe     | chr12q13.1           | proteolysis                               | ---                                       | 1.27          | 1.41            | 1.26      | 1.05        | 1.32      | -1.01       | 1.06       | 1.10         | 1.35       | 1.01         | 1.59       | 1.59         |
| SEN2         | SUMO1/sentrin/SMT3 spec       | chr3q27.2            | positive regulation of protein phosphoryl | ---                                       | 1.03          | 1.09            | 1.00      | -1.09       | -1.06     | -1.05       | -1.09      | -1.13        | -1.90      | -1.58        | -1.09      | -1.20        |
| SEN5         | SUMO1/sentrin specific pep    | chr3q29              | proteolysis                               | ---                                       | 1.14          | 1.31            | 1.37      | 1.05        | 1.10      | 1.09        | 1.11       | 1.08         | 1.23       | -1.19        | 1.93       | 1.29         |
| SEN6         | SUMO1/sentrin specific pep    | chr6q13-q14.3        | proteolysis                               | ---                                       | 1.04          | -1.12           | 1.01      | 1.01        | 1.02      | 1.06        | 1.04       | 1.03         | -1.47      | -1.40        | -1.18      | -1.40        |
| SEN6         | SUMO1/sentrin specific pep    | chr6q13-q14.3        | proteolysis                               | ---                                       | 1.87          | 1.63            | 1.02      | -1.14       | -1.08     | 1.17        | -1.25      | -1.00        | -2.06      | -1.92        | -2.10      | -2.76        |
| SEN6         | SUMO1/sentrin specific pep    | chr6q13-q14.3        | proteolysis                               | ---                                       | -1.12         | 1.06            | -1.00     | -1.02       | 1.04      | 1.08        | 1.63       | 1.43         | 1.58       | 1.50         | 1.41       | 1.37         |
| SEN8         | SUMO/sentrin specific pep     | chr15q23             | proteolysis                               | ---                                       | -1.22         | -1.15           | 1.25      | 1.07        | 1.00      | -1.14       | -1.42      | -1.09        | -1.68      | -1.43        | -1.43      | -1.27        |
| SEN8         | SUMO/sentrin specific pep     | chr15q23             | proteolysis                               | ---                                       | -1.25         | -1.02           | 1.01      | -1.12       | 1.04      | 1.16        | -1.16      | 1.15         | -2.57      | -1.59        | -1.15      | -1.19        |
| SEPHS1       | selenophosphate synthetase    | chr10p14             | cellular protein modification process     | ---                                       | 1.01          | -1.02           | 1.07      | 1.03        | 1.08      | -1.08       | 1.11       | 1.00         | -1.01      | -1.16        | -1.11      | -1.26        |
| SEPHS1       | selenophosphate synthetase    | chr10p14             | cellular protein modification process     | ---                                       | -1.00         | 1.00            | -1.04     | 1.22        | 1.11      | 1.03        | 1.12       | 1.15         | 1.52       | 1.36         | 1.30       | 1.33         |
| SEPP1        | selenoprotein P, plasma, 1    | chr5q31              | selenium compound metabolic process       | ---                                       | 2.45          | 2.00            | -1.59     | -1.69       | 1.14      | 1.16        | -1.43      | -2.43        | -2.26      | -2.85        | 1.03       | -5.02        |
| SEPP1        | selenoprotein P, plasma, 1    | chr5q31              | selenium compound metabolic process       | Integrin-mediated_cell_adhesion_KEGG // C | 1.05          | -1.05           | 1.06      | 1.18        | 1.15      | 1.17        | -1.23      | 1.09         | -3.71      | -2.41        | -2.86      | -3.01        |
| SEPSECS      | Sep (O-phosphoserine) tRN     | chr4p15.2            | selenocysteine incorporation              | ---                                       | 1.06          | 1.17            | 1.13      | 1.04        | -1.10     | -1.04       | -1.19      | -1.01        | -1.94      | -1.68        | -1.21      | -1.03        |
| SEPSECS      | Sep (O-phosphoserine) tRN     | chr4p15.2            | selenocysteine incorporation              | ---                                       | 1.10          | 1.15            | 1.24      | 1.34        | 1.48      | 1.00        | -1.25      | -1.26        | -1.45      | 1.04         | 1.09       | 1.09         |
| SEPT10       | sepin 10                      | chr2q13              | cell cycle                                | ---                                       | -1.16         | 1.04            | -1.17     | 1.02        | 1.11      | -1.06       | 1.05       | 1.13         | -1.00      | -1.13        | 1.18       | 1.09         |
| SEPT10       | sepin 10                      | chr2q13              | cell cycle                                | ---                                       | 1.02          | 1.08            | -1.04     | -1.07       | -1.16     | -1.01       | -1.18      | -1.23        | -1.14      | -1.05        | -1.25      | -1.29        |
| SEPT11       | sepin 11                      | chr4q21.1            | cell cycle                                | ---                                       | 1.08          | -1.17           | 1.38      | 1.60        | -1.29     | -1.23       | 1.12       | -1.18        | 1.19       | 1.58         | -1.25      | -1.45        |
| SEPT11       | sepin 11                      | chr4q21.1            | cell cycle                                | ---                                       | -1.05         | 1.09            | -1.07     | -1.31       | -1.18     | -1.08       | -1.01      | 1.16         | -1.49      | -1.29        | -1.74      | -1.92        |
| SEPT11       | sepin 11                      | chr4q21.1            | cell cycle                                | ---                                       | 1.18          | 1.10            | 1.02      | 1.01        | -1.03     | -1.03       | 1.04       | -1.12        | 1.01       | 1.06         | -1.28      | -1.37        |
| SEPT2        | sepin 2                       | chr2q37              | regulation of L-glutamate transport       | ---                                       | -1.20         | 1.04            | 1.19      | -1.27       | 1.15      | -1.10       | -1.17      | -1.15        | -3.04      | -2.58        | -2.17      | -2.44        |
| SEPT2        | sepin 2                       | chr2q37              | regulation of L-glutamate transport       | ---                                       | -1.14         | 1.03            | -1.06     | -1.16       | -1.06     | -1.07       | -1.04      | -1.10        | -1.20      | -1.07        | -1.28      | -1.40        |
| SEPT6        | sepin 6                       | chrXq24              | cytokinesis                               | ---                                       | -1.09         | -1.14           | 1.11      | 1.06        | 1.08      | -1.08       | 1.25       | 1.15         | 1.02       | -1.04        | -1.81      | -2.08        |
| SEPT6        | sepin 6                       | chrXq24              | cytokinesis                               | ---                                       | 1.07          | 1.05            | 1.03      | -1.04       | 1.04      | -1.13       | -1.26      | -1.31        | -1.19      | -1.19        | -1.33      | -1.54        |
| SEPT6        | sepin 6                       | chrXq24              | cytokinesis                               | ---                                       | 1.03          | 1.02            | 1.11      | -1.01       | -1.15     | 1.14        | 1.02       | 1.14         | -1.16      | 1.21         | -1.57      | -1.40        |
| SEPT6        | sepin 6                       | chrXq24              | cytokinesis                               | ---                                       | 1.12          | 1.06            | 1.01      | -1.01       | 1.00      | 1.18        | 1.21       | 1.10         | 1.29       | 1.26         | 1.00       | -1.06        |
| SEPT7        | sepin 7                       | chr7p14.2            | cytokinesis                               | ---                                       | 1.00          | 1.15            | 1.05      | 1.26        | 1.18      | 1.04        | 1.04       | -1.07        | 1.17       | 1.08         | -1.62      | -1.29        |
| SEPT7        | sepin 7                       | chr7p14.2            | cytokinesis                               | ---                                       | -1.02         | 1.03            | -1.11     | -1.07       | -1.13     | 1.01        | -1.10      | -1.06        | 1.00       | 1.02         | -1.08      | -1.11        |
| SEPT8        | sepin 8                       | chr5q31              | cell cycle                                | ---                                       | -2.01         | -1.05           | 1.30      | 2.84        | 3.18      | 2.67        | 1.56       | 1.96         | 3.86       | 5.56         | 1.76       | 1.79         |
| SEPT8        | sepin 8                       | chr5q31              | cell cycle                                | ---                                       | 1.22          | 1.21            | 1.04      | -1.19       | -1.09     | -1.02       | -1.00      | 1.01         | -1.22      | -1.18        | -1.47      | -1.44        |
| SEPT9        | sepin 9                       | chr17q25             | GTP catabolic process                     | ---                                       | -1.07         | -1.14           | -1.02     | -1.02       | 1.12      | 1.05        | 1.20       | 1.12         | 1.26       | 1.33         | -1.08      | 1.13         |
| SEPW1        | selenoprotein W, 1            | chr19q13.3           | cell redox homeostasis                    | ---                                       | -1.07         | -1.03           | -1.07     | -1.03       | 1.06      | 1.01        | -1.04      | -1.05        | 1.26       | 1.23         | 1.09       | 1.17         |
| SERAC1       | serine active site containing | chr6q25.3            | GPI anchor metabolic process              | ---                                       | 1.59          | -1.27           | 1.13      | 1.06        | 1.46      | 1.77        | -1.88      | 1.06         | 1.40       | 1.62         | 1.82       | 1.42         |
| SERAC1       | serine active site containing | chr6q25.3            | GPI anchor metabolic process              | ---                                       | 1.00          | -1.08           | 1.17      | 1.13        | -1.01     | -1.15       | 1.03       | -1.03        | -1.17      | -1.33        | 1.11       | -1.19        |
| SERBP1       | SERPINE1 mRNA binding         | chr1p31              | regulation of mRNA stability              | ---                                       | -1.04         | -1.06           | 1.06      | 1.11        | 1.09      | 1.08        | -1.11      | -1.10        | -1.09      | -1.10        | -1.28      | -1.10        |
| SERBP1       | SERPINE1 mRNA binding         | chr1p31              | regulation of mRNA stability              | ---                                       | 1.02          | 1.04            | -1.08     | 1.04        | -1.09     | 1.03        | -1.08      | -1.07        | -1.27      | -1.09        | -1.33      | -1.32        |
| SERBP1       | SERPINE1 mRNA binding         | chr1p31              | regulation of mRNA stability              | ---                                       | 1.02          | 1.08            | 1.03      | -1.04       | 1.07      | -1.10       | 1.22       | 1.06         | 1.18       | 1.03         | -1.15      | -1.12        |
| SERBP1       | SERPINE1 mRNA binding         | chr1p31              | regulation of mRNA stability              | ---                                       | 1.03          | -1.10           | 1.03      | 1.04        | -1.10     | 1.23        | -1.00      | 1.12         | -1.26      | -1.18        | -1.45      | -1.50        |
| SERBP1       | SERPINE1 mRNA binding         | chr1p31              | regulation of mRNA stability              | ---                                       | 1.04          | 1.03            | -1.06     | -1.01       | -1.04     | 1.12        | -1.22      | -1.11        | -1.27      | -1.12        | -1.41      | -1.38        |
| SERF1A /// S | small EDRK-rich factor 1A     | chr5q13 /// chr5q13  | nervous system development                | ---                                       | -1.09         | -1.01           | 1.06      | -1.12       | 1.16      | -1.04       | -1.02      | -1.10        | -1.48      | -1.51        | -1.40      | -1.78        |
| SERF1A /// S | small EDRK-rich factor 1A     | chr5q13 /// chr5q13  | nervous system development                | ---                                       | 1.03          | 1.03            | -1.04     | -1.07       | -1.03     | -1.02       | -1.09      | 1.02         | -1.40      | -1.41        | -1.53      | -1.76        |
| SERF1A /// S | small EDRK-rich factor 1A     | chr5q13 /// chr5q13  | nervous system development                | ---                                       | 1.08          | 1.08            | 1.03      | 1.02        | 1.09      | -1.02       | -1.15      | -1.05        | -2.15      | -1.99        | -2.11      | -2.50        |
| SERGEF       | secretion regulating guamin   | chr11p14.3           | signal transduction                       | ---                                       | -1.08         | -1.15           | -1.02     | 1.11        | 1.03      | 1.11        | 1.23       | 1.26         | 1.73       | 1.74         | 1.39       | 1.80         |
| SERGEF       | secretion regulating guamin   | chr11p14.3           | signal transduction                       | ---                                       | -1.01         | -1.01           | -1.04     | 1.11        | 1.06      | -1.10       | 1.45       | 1.33         | 1.90       | 1.76         | 1.40       | 1.76         |
| SERHL /// SE | serine hydrolase-like /// ser | chr22q0              | ---                                       | ---                                       | 1.09          | -1.33           | -1.13     | 1.13        | 1.20      | 1.27        | -1.04      | 1.04         | -1.19      | 1.15         | -1.38      | -1.17        |
| SERINC2      | serine incorporator 2         | chr1p35.1            | phosphatidylserine metabolic process      | ---                                       | -1.12         | -1.32           | 1.04      | -1.02       | 1.19      | 1.03        | 1.01       | -1.16        | 1.48       | 1.63         | 1.47       | 1.70         |
| SERINC2      | serine incorporator 2         | chr1p35.1            | phosphatidylserine metabolic process      | ---                                       | -1.05         | -1.21           | 1.12      | 1.06        | 1.19      | 1.08        | 1.22       | 1.14         | 1.86       | 1.82         | 1.45       | 1.44         |
| SERINC3      | serine incorporator 3         | chr20q13.12          | induction of apoptosis                    | ---                                       | 1.08          | 1.03            | 1.04      | 1.06        | -1.07     | 1.02        | 1.05       | 1.08         | -1.21      | -1.12        | -1.24      | -1.45        |
| SERINC5      | serine incorporator 5         | chr5q14.1            | lipid metabolic process                   | ---                                       | 1.18          | 1.16            | 1.08      | 1.01        | -1.10     | -1.05       | -1.35      | -1.10        | -1.71      | -1.54        | -1.04      | -1.34        |
| SERP1        | stress-associated endoplasm   | chr3q25.1            | skeletal system development               | ---                                       | 1.06          | 1.01            | -1.01     | 1.04        | 1.03      | -1.01       | -1.00      | -1.10        | 1.27       | 1.24         | 1.49       | 1.46         |
| SERP1        | stress-associated endoplasm   | chr3q25.1            | skeletal system development               | ---                                       | 1.18          | 1.16            | 1.02      | 1.07        | -1.03     | 1.09        | -1.18      | -1.16        | -1.00      | -1.03        | -1.24      | -1.14        |
| SERP1        | stress-associated endoplasm   | chr3q25.1            | skeletal system development               | ---                                       | -1.25         | -1.19           | -1.12     | -1.05       | 1.10      | 1.34        | -1.05      | 1.15         | -3.24      | -2.20        | -6.85      | -2.43        |
| SERPINA1     | serpin peptidase inhibitor, c | chr14q32.1           | response to hypoxia                       | ---                                       | -1.44         | 1.26            | -2.17     | 3.04        | 1.70      | 3.15        | 1.06       | 1.22         | -1.23      | -1.02        | 3.14       | 2.80         |
| SERPINA1     | serpin peptidase inhibitor, c | chr14q32.1           | response to hypoxia                       | ---                                       | -1.57         | 1.37            | 1.80      | 1.39        | -1.26     | 2.83        | 9.51       | 5.38         | 4.44       | 2.64         | 3.13       | 5.42         |
| SERPINA10    | serpin peptidase inhibitor, c | chr14q32.13          | blood coagulation                         | ---                                       | -1.38         | -1.99           | 3.84      | -1.71       | 6.10      | 11.39       | -1.75      | -2.03        | 1.60       | 2.95         | -1.62      | 1.15         |
| SERPINB1     | serpin peptidase inhibitor, c | chr6p25              | negative regulation of peptidase activity | ---                                       | -1.02         | 1.06            | 1.04      | -1.03       | 1.23      | -1.01       | 1.32       | -1.01        | 2.91       | 2.20         | 3.55       | 3.08         |
| SERPINB1     | serpin peptidase inhibitor, c | chr6p25              | negative regulation of peptidase activity | ---                                       | -1.08         | -1.02           | 1.02      | -1.02       | -1.12     | -1.05       | -1.11      | -1.04        | 1.31       | 1.23         | 1.26       | 1.25         |
| SERPINB1     | serpin peptidase inhibitor, c | chr6p25              | negative regulation of peptidase activity | ---                                       | 1.16          | 1.14            | -1.00     | 1.18        | 1.01      | 1.20        | -1.05      | -1.00        | 1.50       | 1.47         | 1.42       | 1.46         |
| SERPINB11    | serpin peptidase inhibitor, c | ---                  | negative regulation of peptidase activity | ---                                       | -2.92         | -1.48           | 2.21      | 1.90        | -1.27     | -1.51       | -2.21      | -1.36        | 2.04       | 1.29         | 1.04       | -1.35        |
| SERPINB13    | serpin peptidase inhibitor, c | chr18q21.33          | response to UV                            | ---                                       | 2.10          | 1.13            | 1.77      | 1.28        | 4.10      | 1.13        | 1.19       | -1.42        | 2.43       | 1.79         | 1.23       | 1.62         |
| SERPINB3     | serpin peptidase inhibitor, c | chr18q21.3           | response to virus                         | ---                                       | -1.45         | -1.79           | -1.60     | -1.06       | 4.02      | 3.87        | -2.31      | -2.82        | 27.24      | 10.44        | 37.95      | 20.75        |
| SERPINB3     | serpin peptidase inhibitor, c | chr18q21.3           | response to virus                         | ---                                       | -2.86         | 6.96            | -1.04     | -1.74       | 2.85      | -2.20       | -2.00      | -2.78        | 18.67      | 7.51         | 27.67      | 16.63        |
| SERPINB3 /// | serpin peptidase inhibitor, c | chr18q21.3           | immune response                           | ---                                       | -2.16         | -1.79           | -1.08     | 1.34        | 1.48      | 1.48        | -8.21      | -3.99        | 21.50      | 6.78         | 17.80      | 9.78         |
| SERPINB4     | serpin peptidase inhibitor, c | chr18q21.3           | immune response                           | ---                                       | 6.29          | 9.97            | -6.23     | 1.44        | -3.22     | -2.71       | -3.49      | -5.20        | 34.73      | 17.52        | 40.59      | 23.69        |
| SERPINB5     | serpin peptidase inhibitor, c | chr18q21.33          | morphogenesis of an epithelium            | ---                                       | 1.01          | 1.06            | 1.04      | -1.03       | 1.04      | 1.05        | 1.05       | 1.01         | 1.25       | 1.19         | 1.14       | 1.10         |
| SERPINB6     | serpin peptidase inhibitor, c | chr6p25              | negative regulation of peptidase activity | ---                                       | 1.10          | 1.23            | 1.08      | 1.00        | 1.04      | 1.19        | -1.21      | -1.11        | -1.96      | -1.87        | -1.32      | -1.02        |

| ID            | Gene Title                     | Chromosomal Location | 1st Gene Ontology Biological Process       | Pathway                                 | A2497 30 mins | A2497P' 30 mins | A2497 2 h | A2497P' 2 h | A2497 4 h | A2497P' 4 h | A2497 24 h | A2497P' 24 h | A2497 48 h | A2497P' 48 h | A2497 72 h | A2497P' 72 h |
|---------------|--------------------------------|----------------------|--------------------------------------------|-----------------------------------------|---------------|-----------------|-----------|-------------|-----------|-------------|------------|--------------|------------|--------------|------------|--------------|
| SERPINB8      | serpin peptidase inhibitor, cl | chr18q22.1           | negative regulation of peptidase activity  | ---                                     | -1.16         | -1.18           | -1.08     | -1.06       | 1.10      | 1.10        | -1.24      | 1.05         | 1.95       | 1.57         | 1.05       | 1.09         |
| SERPINB9      | serpin peptidase inhibitor, cl | chr6p25              | mast cell mediated immunity                | ---                                     | -1.03         | -1.01           | -1.10     | -1.60       | -1.05     | 1.11        | -1.14      | -1.17        | 1.35       | 1.35         | 1.07       | -1.17        |
| SERPINE1      | serpin peptidase inhibitor, cl | chr7q22.1            | response to reactive oxygen species        | Blood_Clotting_Cascade // GenMAPP // TC | 1.15          | -1.03           | 1.18      | 1.36        | -1.01     | -1.16       | 1.39       | 1.23         | 9.64       | 8.11         | 8.73       | 11.43        |
| SERPINE1      | serpin peptidase inhibitor, cl | chr7q22.1            | response to reactive oxygen species        | Blood_Clotting_Cascade // GenMAPP // TC | -1.27         | -1.14           | -1.33     | 1.02        | -1.03     | -1.25       | 1.41       | 1.04         | 9.70       | 11.49        | 6.91       | 9.86         |
| SERPING1      | serpin peptidase inhibitor, cl | chr11q12.1           | negative regulation of complement activ    | ---                                     | -1.92         | 1.31            | 1.12      | -2.63       | -1.55     | 1.35        | -1.05      | 1.51         | -1.18      | -1.90        | -2.09      | -1.27        |
| SERTAD1       | SERTA domain containing        | chr19q13.1-q13.2     | regulation of cyclin-dependent protein se  | ---                                     | -1.07         | -1.20           | -1.06     | 1.02        | -1.02     | -1.06       | -1.24      | 1.19         | 1.79       | 1.43         | 2.03       | 2.75         |
| SERTAD2       | SERTA domain containing        | chr2p14              | transcription, DNA-dependent               | ---                                     | -1.01         | -1.04           | 1.16      | -1.11       | -1.05     | 1.00        | -1.07      | -1.17        | 1.24       | 1.25         | 1.60       | 1.49         |
| SERTAD2       | SERTA domain containing        | chr2p14              | transcription, DNA-dependent               | ---                                     | 1.08          | -1.00           | 1.12      | 1.13        | -1.07     | 1.05        | 1.31       | 1.15         | 1.68       | 1.62         | 1.71       | 1.61         |
| SESN1         | sestrin 1                      | chr6q21              | response to DNA damage stimulus            | ---                                     | 1.01          | 1.01            | 1.01      | 1.03        | 1.06      | -1.05       | -1.08      | -1.04        | -1.71      | -1.35        | -1.68      | -1.51        |
| SESN3         | sestrin 3                      | chr11q21             | cell cycle arrest                          | ---                                     | 1.22          | 1.48            | 1.42      | 1.20        | -2.14     | -1.44       | 2.51       | 1.04         | -1.57      | -2.27        | 1.61       | -1.06        |
| SESN3         | sestrin 3                      | chr11q21             | cell cycle arrest                          | ---                                     | 1.04          | 1.03            | -1.04     | -1.14       | -1.21     | -1.15       | -1.69      | -1.42        | -1.70      | -1.41        | -1.55      | -1.73        |
| SESTD1        | SEC14 and spectrin domain      | chr2q31.2            | 0                                          | ---                                     | -1.15         | -1.14           | 1.08      | 1.17        | 1.25      | 1.27        | -1.68      | -1.22        | -1.63      | -1.20        | -1.35      | -1.18        |
| SESTD1        | SEC14 and spectrin domain      | chr2q31.2            | 0                                          | ---                                     | -1.01         | -1.16           | -1.06     | 1.00        | 1.14      | -1.04       | -1.03      | -1.03        | -1.33      | -1.29        | -1.51      | -1.48        |
| SESTD1        | SEC14 and spectrin domain      | chr2q31.2            | 0                                          | ---                                     | 1.06          | 1.02            | 1.12      | -1.02       | 1.08      | 1.09        | -1.37      | -1.29        | -1.57      | -1.31        | -1.40      | -1.30        |
| SET           | SET nuclear oncogene           | chr9q34              | DNA replication                            | ---                                     | 1.04          | 1.07            | -1.04     | -1.01       | 1.00      | -1.00       | 1.05       | -1.04        | 1.05       | 1.03         | -1.09      | -1.10        |
| SET           | SET nuclear oncogene           | chr9q34              | DNA replication                            | ---                                     | -1.05         | 1.04            | -1.10     | -1.04       | -1.02     | -1.04       | 1.02       | -1.03        | 1.05       | 1.04         | -1.13      | -1.12        |
| SET           | SET nuclear oncogene           | chr9q34              | DNA replication                            | ---                                     | -1.02         | 1.05            | -1.05     | -1.01       | -1.00     | -1.06       | 1.04       | -1.06        | 1.08       | 1.03         | -1.09      | -1.13        |
| SETBP1        | SET binding protein 1          | chr18q21.1           | 0                                          | ---                                     | -1.08         | 1.12            | 1.17      | 1.38        | -1.15     | -1.07       | -1.45      | 1.01         | -4.58      | -5.51        | -6.63      | -9.20        |
| SETBP1        | SET binding protein 1          | chr18q21.1           | 0                                          | ---                                     | 1.06          | -1.06           | -1.27     | -1.06       | -1.06     | -1.12       | -1.24      | -1.17        | -3.87      | -2.20        | -3.01      | -2.23        |
| SETD1A        | SET domain containing 1A       | chr16p11.2           | transcription, DNA-dependent               | ---                                     | 1.14          | -1.01           | 1.09      | -1.15       | -1.32     | -1.24       | 1.01       | 1.42         | 1.05       | 1.11         | -1.51      | -1.32        |
| SETD1B        | SET domain containing 1B       | chr12q24.31          | transcription, DNA-dependent               | ---                                     | 1.02          | 1.06            | 1.02      | 1.01        | -1.00     | 1.03        | -1.08      | -1.02        | -1.98      | -1.76        | -1.21      | -1.41        |
| SETD4         | SET domain containing 4        | chr21q22.13          | methylation                                | ---                                     | -1.12         | -1.14           | -1.19     | -1.25       | -1.04     | -1.05       | 1.16       | 1.00         | -1.31      | -1.50        | 1.03       | -1.15        |
| SETD4         | SET domain containing 4        | chr21q22.13          | methylation                                | ---                                     | 1.21          | 1.16            | -1.12     | 1.05        | -1.00     | 1.06        | -1.16      | -1.05        | -2.97      | -2.29        | -2.07      | -1.90        |
| SETD4         | SET domain containing 4        | chr21q22.13          | 0                                          | ---                                     | -1.19         | -1.06           | -1.05     | 1.00        | 1.23      | 1.23        | 1.05       | 1.12         | -1.56      | -1.35        | -1.24      | -1.16        |
| SETD5         | SET domain containing 5        | chr3p25.3            | 0                                          | ---                                     | -1.01         | -1.03           | 1.02      | -1.03       | -1.04     | 1.00        | -1.08      | -1.04        | -1.20      | -1.05        | -1.07      | -1.17        |
| SETD7         | SET domain containing 7y       | chr4q28              | transcription, DNA-dependent               | ---                                     | -1.14         | -1.24           | 1.04      | 1.12        | 1.16      | 1.21        | -1.04      | -1.05        | -1.75      | -2.07        | -2.49      | -3.22        |
| SETD7         | SET domain containing 7y       | chr4q28              | transcription, DNA-dependent               | ---                                     | 1.01          | 1.03            | -1.03     | -1.02       | -1.02     | -1.01       | -1.14      | -1.01        | -1.47      | -1.25        | -1.25      | -1.38        |
| SETD9         | SET domain containing 9        | chr5q11.2            | methylation                                | ---                                     | 1.15          | 1.10            | 1.02      | -1.15       | -1.04     | -1.02       | 1.08       | 1.12         | -1.43      | -1.33        | -1.74      | -2.26        |
| SETDB1        | SET domain, bifurcated 1       | chr1q21              | inner cell mass cell proliferation         | ---                                     | 1.18          | 1.14            | -1.00     | -1.06       | -1.08     | -1.12       | 1.52       | 1.25         | 1.23       | 1.22         | 1.82       | 1.33         |
| SETDB2        | SET domain, bifurcated 2       | chr13q14             | heart looping                              | ---                                     | 1.15          | 1.17            | 1.11      | -1.03       | 1.15      | 1.48        | -1.11      | -1.00        | -1.78      | -1.45        | -1.14      | -1.85        |
| SETDB2        | SET domain, bifurcated 2       | chr13q14             | heart looping                              | ---                                     | -1.08         | -1.12           | 1.05      | 1.14        | 1.11      | 1.09        | 1.27       | 1.14         | -1.08      | -1.55        | -1.18      | -1.08        |
| SETMAR        | SET domain and mariner tr      | chr3p26.1            | DNA double-strand break processing         | ---                                     | -1.08         | 1.21            | -1.09     | 1.30        | -1.05     | -1.41       | 1.23       | 1.43         | -3.77      | -2.63        | -5.20      | -4.55        |
| SETMAR        | SET domain and mariner tr      | chr3p26.1            | DNA double-strand break processing         | ---                                     | 1.59          | 1.04            | 1.09      | 1.41        | -1.23     | -1.07       | 1.37       | -1.34        | -3.34      | -3.09        | -4.92      | -3.72        |
| SETMAR        | SET domain and mariner tr      | chr3p26.1            | DNA double-strand break processing         | ---                                     | -1.07         | -1.08           | -1.02     | 1.12        | -1.01     | -1.01       | -1.05      | 1.01         | -1.71      | -1.61        | -1.80      | -1.85        |
| SETX          | senataxin                      | chr9q34.13           | DNA repair                                 | ---                                     | 1.31          | 1.21            | 1.03      | -1.08       | 1.17      | 1.02        | 1.10       | 1.02         | -1.41      | -1.50        | -1.04      | -1.30        |
| SETX          | senataxin                      | chr9q34.13           | DNA repair                                 | ---                                     | 1.28          | 1.23            | -1.02     | -1.04       | 1.41      | 1.18        | 1.19       | 1.04         | 1.75       | 1.33         | 1.59       | 1.35         |
| SEZ6L2        | seizure related 6 homolog      | chr16p11.2           | 0                                          | ---                                     | -1.08         | -1.08           | -1.01     | 1.28        | 1.07      | 1.01        | 1.11       | -1.02        | 1.52       | 1.28         | 1.18       | 1.43         |
| SEZ6L2        | seizure related 6 homolog      | chr16p11.2           | 0                                          | ---                                     | 1.27          | 1.13            | 1.21      | 1.06        | -1.00     | -1.14       | 1.09       | 1.22         | 1.12       | -1.05        | 1.35       | 1.67         |
| SF1           | splicing factor 1              | chr11q13             | spliceosomal complex assembly              | ---                                     | -1.04         | -1.01           | -1.03     | 1.01        | -1.04     | -1.02       | -1.03      | -1.02        | -1.04      | -1.14        | -1.10      | -1.08        |
| SF1           | splicing factor 1              | chr11q13             | spliceosomal complex assembly              | ---                                     | -1.10         | 1.13            | 1.25      | -1.05       | 1.35      | 1.43        | -1.33      | -1.11        | -3.17      | -2.79        | -1.57      | -1.49        |
| SF1           | splicing factor 1              | chr11q13             | spliceosomal complex assembly              | ---                                     | 8.75          | 4.32            | 1.55      | -1.03       | -1.08     | 1.60        | 2.01       | 1.52         | -1.19      | -1.46        | -2.20      | -5.05        |
| SF3A1         | splicing factor 3a, subunit    | chr22q12.2           | mRNA 3'-splice site recognition            | mRNA_processing_Reactome // GenMAPP     | -1.08         | 1.03            | -1.06     | 1.00        | 1.01      | -1.03       | -1.13      | -1.05        | -1.51      | -1.46        | -1.36      | -1.36        |
| SF3B2         | splicing factor 3b, subunit    | chr11q13.1           | mRNA splicing, via spliceosome             | mRNA_processing_Reactome // GenMAPP     | -1.10         | 1.01            | -1.08     | -1.05       | -1.01     | -1.10       | 1.14       | 1.01         | 1.37       | 1.25         | 1.22       | 1.30         |
| SF3B3         | splicing factor 3b, subunit    | chr16q22.1           | RNA splicing, via transesterification reac | ---                                     | -1.00         | -1.08           | -1.05     | 1.01        | 1.07      | 1.07        | 1.09       | 1.02         | 1.00       | -1.04        | -1.30      | -1.26        |
| SF3B3         | splicing factor 3b, subunit    | chr16q22.1           | RNA splicing, via transesterification reac | ---                                     | -1.03         | -1.13           | 1.03      | 1.19        | 1.18      | 1.05        | 1.01       | 1.11         | 1.03       | -1.04        | 1.75       | 1.88         |
| SF3B4         | splicing factor 3b, subunit    | chr1q21.2            | RNA splicing, via transesterification reac | mRNA_processing_Reactome // GenMAPP     | 1.06          | 1.00            | 1.01      | 1.07        | -1.09     | 1.06        | -1.19      | -1.18        | 1.02       | -1.24        | -1.03      | -1.11        |
| SF1           | Sf1 homolog, spindle asse      | chr22q12.2           | G2                                         | ---                                     | 1.29          | 1.15            | 1.04      | 1.25        | 1.09      | -1.07       | 1.06       | -1.00        | 1.33       | 1.33         | -1.32      | -1.34        |
| SFMBT1        | Scm-like with four mbt dom     | chr3p21.1            | transcription, DNA-dependent               | ---                                     | 1.06          | 1.20            | -1.04     | -1.08       | 1.19      | 1.01        | -1.16      | 1.03         | -1.64      | -1.35        | -1.12      | -1.11        |
| SFMBT2        | Scm-like with four mbt dom     | chr10p14             | regulation of transcription, DNA-depend    | ---                                     | 1.01          | 1.06            | 1.07      | -1.07       | -1.02     | -1.07       | 1.07       | 1.02         | -1.98      | -1.93        | -1.59      | -1.75        |
| SFR1          | SWI5-dependent recombin        | chr10q25.1           | double-strand break repair via homolog     | ---                                     | 1.31          | 1.30            | 1.05      | -1.31       | 1.09      | -1.01       | -1.26      | -1.35        | -1.16      | -1.17        | 1.54       | 1.23         |
| SFSWAP        | splicing factor, suppressor    | chr12q24.33          | transcription, DNA-dependent               | mRNA_processing_Reactome // GenMAPP     | 1.08          | 1.12            | 1.11      | 1.16        | 1.05      | -1.08       | 1.09       | 1.19         | 1.39       | 1.15         | 1.47       | 1.35         |
| SFSWAP        | splicing factor, suppressor    | chr12q24.33          | transcription, DNA-dependent               | mRNA_processing_Reactome // GenMAPP     | -1.07         | -1.08           | 1.05      | 1.02        | 1.04      | -1.06       | -1.03      | 1.09         | 1.35       | 1.13         | 1.52       | 1.45         |
| SFT2D1        | SFT2 domain containing 1       | chr6q27              | transport                                  | ---                                     | 1.03          | 1.07            | -1.04     | -1.05       | 1.03      | 1.02        | 1.03       | 1.06         | 1.12       | 1.13         | 1.27       | 1.14         |
| SFT2D1        | SFT2 domain containing 1       | chr6q27              | protein transport                          | ---                                     | -1.10         | -1.02           | -1.05     | -1.20       | 1.11      | -1.02       | 1.02       | 1.01         | 1.32       | 1.18         | 1.43       | 1.23         |
| SFT2D1        | SFT2 domain containing 1       | chr6q27              | transport                                  | ---                                     | 1.05          | 1.04            | -1.07     | -1.12       | -1.00     | 1.10        | -1.26      | -1.11        | 1.09       | 1.21         | 1.15       | 1.13         |
| SFT2D2        | SFT2 domain containing 2       | chr1q24.2            | transport                                  | ---                                     | -1.02         | -1.03           | -1.05     | -1.02       | -1.01     | -1.09       | -1.04      | 1.22         | -1.29      | -1.08        | 1.34       | 1.38         |
| SFT2D3        | SFT2 domain containing 3       | chr2q14.3            | transport                                  | ---                                     | -1.04         | 1.09            | -1.07     | 1.08        | 1.05      | 1.03        | -1.08      | -1.08        | -1.93      | -1.12        | -2.55      | -2.11        |
| SFT2D3 /// W  | SFT2 domain containing 3       | chr2q14.3            | postreplication repair                     | ---                                     | -1.07         | 1.01            | 1.14      | 1.16        | -1.03     | 1.07        | 1.64       | 1.28         | 1.77       | 1.48         | 1.78       | 1.54         |
| SFT2D3 /// W  | SFT2 domain containing 3       | chr2q14.3            | postreplication repair                     | ---                                     | 1.05          | 1.02            | -1.01     | -1.06       | 1.16      | 1.12        | 1.07       | 1.12         | 1.37       | 1.39         | 1.96       | 2.14         |
| SFT2D3 /// W  | SFT2 domain containing 3       | chr2q14.3            | postreplication repair                     | ---                                     | 1.66          | 1.87            | 1.19      | -1.11       | 1.20      | 1.13        | -1.37      | -1.57        | -2.00      | -4.14        | -1.33      | -1.43        |
| SFT2D3 /// W  | SFT2 domain containing 3       | chr2q14.3            | postreplication repair                     | ---                                     | 1.21          | 1.14            | 1.31      | 1.11        | 1.16      | 1.11        | -1.26      | 1.12         | -1.95      | -1.54        | -1.54      | -1.24        |
| SFTA3         | surfactant associated 3        | chr14q13.3           | 0                                          | ---                                     | -6.98         | -11.97          | 4.59      | 9.53        | 1.02      | 1.21        | 1.53       | -2.80        | -3.58      | -2.92        | 3.09       | 5.17         |
| SFTP1A1 /// S | surfactant protein A1 /// sur  | chr10q22.3           | lipid transport                            | ---                                     | 1.23          | 1.05            | -1.40     | 1.55        | -1.36     | -1.21       | 1.00       | 3.01         | 7.24       | 13.32        | -1.89      | 1.03         |
| SFTPB         | surfactant protein B           | chr2p12-p11.2        | response to hypoxia                        | ---                                     | -2.20         | -1.48           | 2.87      | 1.38        | -1.40     | 1.10        | 1.08       | -1.06        | 1.37       | 1.74         | 1.93       | 1.55         |
| SFXN1         | sideroflexin 1                 | ---                  | transport                                  | ---                                     | 1.06          | 1.02            | 1.07      | 1.11        | -1.03     | 1.08        | -1.31      | -1.06        | 1.09       | 1.10         | 1.17       | 1.31         |
| SFXN2         | sideroflexin 2                 | chr10q24.32          | transport                                  | ---                                     | 1.04          | -1.01           | 1.02      | 1.01        | 1.01      | -1.02       | -1.14      | -1.03        | -2.87      | -2.59        | -3.64      | -3.49        |

| ID        | Gene Title                  | Chromosomal Location | 1st Gene Ontology Biological Process       | Pathway                                   | A2497 30 mins | A2497P' 30 mins | A2497 2 h | A2497P' 2 h | A2497 4 h | A2497P' 4 h | A2497 24 h | A2497P' 24 h | A2497 48 h | A2497P' 48 h | A2497 72 h | A2497P' 72 h |
|-----------|-----------------------------|----------------------|--------------------------------------------|-------------------------------------------|---------------|-----------------|-----------|-------------|-----------|-------------|------------|--------------|------------|--------------|------------|--------------|
| SFXN3     | sideroflexin 3              | chr10q24.31          | negative regulation of transcription from  | ---                                       | -1.08         | -1.09           | 1.00      | 1.09        | -1.06     | 1.00        | 1.11       | 1.14         | 1.12       | 1.20         | -1.01      | 1.25         |
| SFXN3     | sideroflexin 3              | chr10q24.31          | transport                                  | ---                                       | -1.01         | -1.00           | -1.02     | 1.02        | -1.05     | -1.05       | 1.12       | 1.06         | 1.26       | 1.24         | 1.03       | 1.12         |
| SFXN4     | sideroflexin 4              | chr10q26.11          | transport                                  | ---                                       | -1.04         | -1.09           | -1.06     | -1.02       | 1.09      | 1.07        | -1.08      | -1.06        | -1.52      | -1.58        | -1.20      | -1.41        |
| SFXN4     | sideroflexin 4              | chr10q26.11          | transport                                  | ---                                       | -1.22         | -1.12           | -1.01     | 1.02        | 1.09      | -1.09       | 1.07       | 1.03         | -1.13      | -1.37        | -1.10      | -1.16        |
| SFXN5     | sideroflexin 4              | chr10q26.11          | iron ion homeostasis                       | ---                                       | 1.04          | -1.18           | 1.06      | 1.04        | 1.32      | 1.15        | 1.16       | 1.01         | -1.15      | -1.37        | -1.13      | -1.30        |
| SFXN5     | sideroflexin 5              | ---                  | transport                                  | ---                                       | -1.17         | -1.24           | -1.05     | 1.04        | 1.08      | 1.01        | 1.33       | 1.45         | -1.76      | -1.87        | -1.78      | -1.44        |
| SGCB      | sarcoglycan, beta (43kDa)   | chr4q12              | cytoskeleton organization                  | ---                                       | 1.26          | 1.03            | 1.05      | -1.08       | 1.19      | 1.18        | 1.03       | -1.23        | -1.55      | -1.23        | -1.80      | -1.94        |
| SGCB      | sarcoglycan, beta (43kDa)   | chr4q12              | cytoskeleton organization                  | ---                                       | 1.06          | 1.06            | 1.16      | 1.12        | -1.01     | -1.17       | 1.04       | 1.16         | -2.05      | -1.30        | -1.79      | -1.92        |
| SGCB      | sarcoglycan, beta (43kDa)   | chr4q12              | cytoskeleton organization                  | ---                                       | -1.03         | -1.05           | 1.01      | -1.03       | -1.10     | -1.05       | -1.19      | -1.04        | -1.67      | -1.38        | -1.55      | -1.52        |
| SGCD      | sarcoglycan, delta (35kDa)  | chr5q33-q34          | cytoskeleton organization                  | ---                                       | -1.17         | 2.82            | 1.63      | 1.82        | -1.02     | -1.21       | 1.26       | -1.24        | -1.23      | -1.24        | 4.65       | 1.30         |
| SGCD      | sarcoglycan, delta (35kDa)  | chr5q33-q34          | cytoskeleton organization                  | ---                                       | -1.89         | 1.00            | -1.79     | -2.32       | 1.62      | -2.14       | 1.10       | 3.69         | -1.64      | 1.78         | 12.70      | 6.49         |
| SGCD      | sarcoglycan, delta (35kDa)  | chr5q33-q34          | cytoskeleton organization                  | ---                                       | -1.30         | 1.36            | 2.47      | 2.07        | 2.20      | 5.06        | 1.09       | -1.74        | 5.33       | 2.35         | 7.18       | 1.90         |
| SGCE      | sarcoglycan, epsilon        | chr7q21.3            | cell-matrix adhesion                       | ---                                       | 1.08          | 1.13            | 1.01      | -1.18       | 1.03      | -1.07       | 1.09       | 1.01         | -1.26      | -1.34        | -1.11      | -1.36        |
| SGK2      | serum/glucocorticoid regul  | chr20q13.2           | regulation of cell growth                  | ---                                       | -1.17         | -3.86           | 2.14      | -1.77       | -4.14     | -1.18       | -2.45      | -1.34        | -1.45      | -3.44        | 2.07       | 2.42         |
| SGK2      | serum/glucocorticoid regul  | chr20q13.2           | regulation of cell growth                  | ---                                       | -1.56         | -1.99           | 1.36      | -1.09       | 6.75      | 15.73       | 1.50       | 1.16         | -1.85      | -2.71        | -5.55      | -1.15        |
| SGK223    | homolog of rat pragra of R  | chr8p23.1            | protein phosphorylation                    | ---                                       | 1.19          | 1.14            | -1.01     | 1.19        | -1.32     | -1.18       | 1.79       | 1.49         | 1.24       | 1.14         | -1.91      | -1.61        |
| SGK494    | uncharacterized serine/thre | chr17q11.2           | protein phosphorylation                    | ---                                       | 1.38          | 1.32            | 1.34      | -1.06       | -1.29     | -1.09       | 1.11       | 1.03         | -1.22      | -1.32        | 1.09       | 1.52         |
| SGMS2     | sphingomyelin synthase 2    | chr4q25              | lipid metabolic process                    | ---                                       | -1.00         | 1.01            | -1.03     | -1.10       | 1.02      | -1.01       | 1.23       | 1.04         | 1.63       | 1.51         | 2.03       | 1.43         |
| SGMS2     | sphingomyelin synthase 2    | chr4q25              | lipid metabolic process                    | ---                                       | -1.08         | -1.24           | 1.26      | -1.01       | 1.16      | 1.06        | -1.03      | -1.01        | -1.01      | 1.12         | 1.38       | 1.14         |
| SGOL1     | shugoshin-like 1 (S. pombe) | chr3p24.3            | M phase of mitotic cell cycle              | ---                                       | 1.16          | 1.00            | 1.08      | -1.14       | 1.11      | -1.01       | -1.93      | -1.41        | -1.59      | -2.02        | -1.68      | -2.12        |
| SGPL1     | sphingosine-1-phosphate ly  | chr10q21             | luteinization                              | ---                                       | 1.30          | 1.35            | 1.05      | -1.28       | -1.14     | -1.03       | -1.35      | -1.14        | -2.03      | -2.08        | -1.48      | -2.32        |
| SGPL1     | sphingosine-1-phosphate ly  | chr10q21             | luteinization                              | ---                                       | 1.13          | 1.05            | -1.09     | -1.12       | -1.06     | -1.04       | -1.28      | -1.11        | -2.49      | -2.45        | -2.12      | -2.26        |
| SGSH      | N-sulfoglucosamine sulfohy  | chr17q25.3           | carbohydrate metabolic process             | ---                                       | -1.17         | -1.14           | 1.26      | 1.21        | 1.07      | -1.06       | 1.48       | 1.41         | 2.09       | 1.59         | -1.08      | 1.01         |
| SGSH      | N-sulfoglucosamine sulfohy  | chr17q25.3           | carbohydrate metabolic process             | ---                                       | -1.14         | -1.02           | 1.06      | 1.06        | -1.10     | -1.03       | 1.33       | -1.08        | 1.72       | 1.31         | -1.09      | 1.14         |
| SGSM2     | small G protein signaling   | chr17p13.3           | regulation of Rab GTPase activity          | ---                                       | 1.04          | -1.03           | 1.00      | 1.25        | -1.07     | -1.24       | 1.42       | 1.37         | 1.16       | 1.03         | -1.35      | -1.14        |
| SGSM3     | small G protein signaling   | chr22q13.1-q13.2     | cell cycle                                 | ---                                       | 1.10          | 1.03            | -1.04     | 1.18        | -1.18     | -1.01       | 1.14       | 1.07         | -1.03      | 1.06         | 1.06       | 1.12         |
| SGTB      | small glutamine-rich tetrat | chr5q12.3            | 0                                          | ---                                       | -1.07         | -1.09           | 1.08      | -1.11       | 1.05      | -1.00       | 1.24       | 1.07         | -1.02      | 1.20         | 1.18       | 1.05         |
| SGTB      | small glutamine-rich tetrat | chr5q12.3            | 0                                          | ---                                       | -1.63         | -1.20           | 1.16      | 1.15        | -1.38     | 1.18        | 1.07       | 1.18         | -1.53      | -1.21        | 1.12       | 1.14         |
| SH2B3     | SH2B adaptor protein 3      | chr12q24             | blood coagulation                          | ---                                       | -1.16         | 1.00            | -1.01     | -1.11       | 1.35      | 1.24        | 1.62       | 1.19         | 2.10       | 1.43         | 1.74       | 1.30         |
| SH2D2A    | SH2 domain containing 2A    | chr1q21              | angiogenesis                               | ---                                       | 1.23          | -1.06           | -1.37     | -1.20       | 1.10      | 1.31        | -1.23      | -1.13        | -1.08      | 1.03         | -1.35      | -1.45        |
| SH2D3A    | SH2 domain containing 3A    | chr19p13.3           | JNK cascade                                | ---                                       | -1.07         | 1.03            | -1.06     | 1.30        | 1.26      | 1.25        | 1.21       | 1.46         | 1.53       | 1.41         | -1.08      | 1.09         |
| SH2D4A    | SH2 domain containing 4A    | chr8p21.2            | negative regulation of phosphatase activi  | ---                                       | -1.08         | -1.06           | -1.01     | -1.00       | 1.02      | -1.00       | -1.08      | -1.00        | -1.05      | -1.07        | 1.26       | 1.24         |
| SH2D4B    | SH2 domain containing 4B    | chr10q23.1           | 0                                          | ---                                       | -1.10         | -2.43           | -3.46     | -1.02       | -2.81     | 1.28        | -5.73      | 1.54         | 10.07      | 5.80         | 3.92       | 3.92         |
| SH2D5     | SH2 domain containing 5     | chr1p36.12           | 0                                          | ---                                       | 1.05          | -1.03           | -1.01     | 1.03        | 1.28      | -1.13       | 1.06       | 1.45         | 2.03       | 2.22         | 5.32       | 4.55         |
| SH3BGR    | SH3 domain binding glutam   | chr21q22.3           | protein complex assembly                   | ---                                       | 1.10          | -1.02           | 1.01      | 1.13        | -1.01     | -1.13       | 1.07       | 1.09         | 1.25       | 1.60         | 1.99       | 2.23         |
| SH3BGRL   | SH3 domain binding glutam   | chrXq13.3            | 0                                          | ---                                       | -1.00         | 1.03            | -1.06     | -1.05       | -1.09     | 1.07        | -1.22      | -1.14        | -1.39      | -1.00        | -1.65      | -1.60        |
| SH3BGRL   | SH3 domain binding glutam   | chrXq13.3            | 0                                          | ---                                       | 1.14          | 1.06            | 1.03      | 1.02        | -1.01     | 1.01        | 1.03       | -1.06        | -1.19      | -1.03        | -1.47      | -1.57        |
| SH3BGRL2  | SH3 domain binding glutam   | chr6q14.1            | cell redox homeostasis                     | ---                                       | -1.22         | -1.19           | -1.12     | 1.23        | -1.17     | 1.04        | 1.11       | -1.14        | -2.14      | -1.84        | -2.04      | -2.47        |
| SH3BGRL3  | SH3 domain binding glutam   | chr1p36.11           | cell redox homeostasis                     | ---                                       | -1.04         | -1.06           | -1.12     | 1.06        | -1.05     | -1.06       | 1.37       | 1.12         | 2.58       | 1.98         | 2.26       | 2.60         |
| SH3BP2    | SH3-domain binding protei   | chr4p16.3            | signal transduction                        | ---                                       | 1.16          | -1.04           | -1.21     | -1.19       | 1.14      | 1.11        | 1.30       | 1.12         | 1.52       | 1.79         | 1.58       | 1.76         |
| SH3BP4    | SH3-domain binding protei   | chr2q37.1-q37.2      | endocytosis                                | ---                                       | -1.04         | -1.04           | 1.04      | 1.02        | 1.21      | 1.01        | 1.26       | 1.12         | 1.25       | 1.11         | -1.32      | -1.18        |
| SH3BP4    | SH3-domain binding protei   | chr2q37.1-q37.2      | endocytosis                                | ---                                       | 1.13          | 1.01            | 1.12      | 1.13        | -1.62     | -1.43       | 1.22       | -1.07        | 4.01       | 3.87         | 2.59       | 2.15         |
| SH3BP5    | SH3-domain binding protei   | chr3p24.3            | negative regulation of protein kinase acti | ---                                       | -1.02         | -1.07           | 1.07      | 1.04        | 1.01      | 1.03        | 1.27       | 1.02         | -1.06      | 1.12         | -1.81      | -1.47        |
| SH3BP5    | SH3-domain binding protei   | chr3p24.3            | negative regulation of protein kinase acti | ---                                       | 1.08          | 1.03            | -1.04     | 1.11        | -1.14     | 1.14        | -1.11      | -1.11        | -1.29      | 1.09         | -2.14      | -2.00        |
| SH3BPSL   | SH3-binding domain protei   | chr1q44              | 0                                          | ---                                       | 1.01          | -1.01           | -1.05     | -1.01       | 1.04      | -1.04       | -1.07      | 1.13         | -1.73      | -1.76        | -1.16      | -1.05        |
| SH3D19    | SH3 domain containing 19    | chr4q31.3            | post-Golgi vesicle-mediated transport      | ---                                       | 1.24          | 1.21            | 1.00      | -1.05       | -1.15     | 1.16        | -1.24      | -1.27        | -1.91      | -1.44        | -1.72      | -1.81        |
| SH3D19    | SH3 domain containing 19    | chr4q31.3            | post-Golgi vesicle-mediated transport      | ---                                       | -1.29         | -1.11           | 1.27      | 1.04        | 1.11      | -1.00       | 1.02       | 1.20         | -1.69      | -1.50        | -1.52      | -1.60        |
| SH3GL1    | SH3-domain GRB2-like 1      | chr19p13.3           | endocytosis                                | Integrin-mediated_cell_adhesion_KEGG // C | -1.07         | -1.15           | 1.07      | 1.17        | -1.04     | 1.02        | 1.21       | 1.32         | 1.40       | 1.55         | 1.01       | 1.35         |
| SH3GL2    | SH3-domain GRB2-like 2      | chr9p22              | regulation of receptor internalization     | ---                                       | 1.00          | 1.01            | -1.02     | 1.01        | 1.07      | 1.00        | 1.02       | 1.22         | -1.21      | -1.17        | -2.16      | -1.91        |
| SH3GL3    | SH3-domain GRB2-like 3      | chr15q24             | endocytosis                                | ---                                       | 2.18          | 2.81            | -2.11     | -1.54       | -1.42     | -1.87       | -1.53      | 1.38         | 1.69       | 1.20         | -2.61      | -1.55        |
| SH3GLB1   | SH3-domain GRB2-like en     | chr1p22              | protein insertion into mitochondrial mem   | ---                                       | 1.05          | 1.05            | -1.01     | -1.09       | 1.03      | -1.01       | 1.07       | 1.02         | 1.03       | -1.01        | 1.43       | 1.21         |
| SH3GLB1   | SH3-domain GRB2-like en     | chr1p22              | protein insertion into mitochondrial mem   | ---                                       | 1.05          | 1.01            | 1.08      | -1.01       | 1.03      | -1.04       | 1.14       | 1.01         | 1.14       | 1.10         | 1.36       | 1.24         |
| SH3GLB2   | SH3-domain GRB2-like en     | chr9q34              | 0                                          | ---                                       | 1.10          | 1.06            | 1.18      | 1.17        | 1.10      | -1.00       | 1.30       | -1.12        | 1.07       | -1.18        | -1.92      | -2.18        |
| SH3GLB2   | SH3-domain GRB2-like en     | chr9q34              | 0                                          | ---                                       | -1.74         | -1.01           | -1.21     | -1.08       | 1.24      | 1.12        | -1.51      | 1.04         | 1.03       | 1.25         | -4.61      | -2.55        |
| SH3GLB2   | SH3-domain GRB2-like en     | chr9q34              | 0                                          | ---                                       | 1.32          | 1.14            | 1.15      | 1.03        | 1.09      | 1.01        | 1.28       | -1.15        | -1.33      | -1.41        | -2.15      | -2.81        |
| SH3GLB2   | SH3-domain GRB2-like en     | chr9q34              | 0                                          | ---                                       | 1.05          | 1.05            | -1.07     | 1.04        | 1.17      | -1.17       | 1.64       | 1.39         | -1.23      | -1.27        | -1.98      | -2.02        |
| SH3KBP1   | SH3-domain kinase binding   | chrXp22.1-p21.3      | endocytosis                                | ---                                       | -1.07         | -1.16           | 1.26      | 1.22        | -1.04     | 1.01        | 1.09       | 1.01         | -1.74      | -2.14        | -2.83      | -2.99        |
| SH3KBP1   | SH3-domain kinase binding   | chrXp22.1-p21.3      | endocytosis                                | ---                                       | 1.08          | 1.09            | -1.05     | -1.13       | -1.05     | 1.15        | -1.13      | 1.04         | -1.02      | 1.11         | -1.45      | -1.44        |
| SH3PXD2A  | SH3 and PX domains 2A       | chr10q24.33          | superoxide metabolic process               | ---                                       | 1.33          | 1.42            | 1.06      | 1.09        | -1.37     | -1.08       | -1.62      | -1.05        | -1.89      | -2.53        | -1.75      | -2.00        |
| SH3PXD2A  | SH3 and PX domains 2A       | chr10q24.33          | superoxide metabolic process               | ---                                       | -1.08         | -1.05           | -1.21     | -1.28       | 1.08      | 1.04        | -1.61      | -1.18        | -2.09      | -1.47        | -1.87      | -1.56        |
| SH3PXD2A  | SH3 and PX domains 2A       | chr10q24.33          | superoxide metabolic process               | ---                                       | 1.10          | 1.18            | 1.10      | 1.28        | -1.03     | -1.04       | 1.11       | -1.06        | -1.48      | -1.54        | -1.14      | -1.55        |
| SH3PXD2A- | SH3PXD2A antisense RNA      | ---                  | 0                                          | ---                                       | -3.07         | -1.48           | -1.22     | 1.04        | 1.59      | 1.04        | 1.19       | 1.96         | 2.65       | 1.52         | -2.38      | -6.44        |
| SH3RF2    | SH3 domain containing rin   | chr5q32              | negative regulation of phosphatase activi  | ---                                       | -1.00         | -1.08           | 1.16      | 1.03        | -1.09     | -1.05       | -1.10      | 1.01         | -1.10      | -1.40        | 1.59       | 1.09         |
| SH3RF2    | SH3 domain containing rin   | chr5q32              | negative regulation of phosphatase activi  | ---                                       | -1.02         | -1.01           | 1.01      | 1.22        | -1.02     | 1.08        | 1.23       | 1.11         | 2.47       | 1.89         | 2.10       | 2.00         |
| SH3RF2    | SH3 domain containing rin   | chr5q32              | negative regulation of phosphatase activi  | ---                                       | -1.08         | -1.09           | -1.02     | 1.02        | 1.02      | 1.00        | 1.07       | 1.08         | -1.07      | -1.29        | -1.03      | 1.01         |
| SH3RF3    | SH3 domain containing rin   | chr2q13              | 0                                          | ---                                       | 1.76          | -2.63           | 6.15      | 1.21        | 1.59      | 1.14        | 1.32       | 1.40         | -1.01      | -1.00        | 1.68       | 1.88         |

| ID              | Gene Title                    | Chromosomal Location | 1st Gene Ontology Biological Process       | Pathway                                   | A2497 30 mins | A2497P' 30 mins | A2497 2 h | A2497P' 2 h | A2497 4 h | A2497P' 4 h | A2497 24 h | A2497P' 24 h | A2497 48 h | A2497P' 48 h | A2497 72 h | A2497P' 72 h |
|-----------------|-------------------------------|----------------------|--------------------------------------------|-------------------------------------------|---------------|-----------------|-----------|-------------|-----------|-------------|------------|--------------|------------|--------------|------------|--------------|
| SH3TC1          | SH3 domain and tetratricop    | chr4p16.1            | 0                                          | ---                                       | -1.12         | -1.75           | 1.31      | 1.47        | -1.16     | -1.40       | -1.33      | 1.21         | 1.93       | 1.74         | 3.88       | 4.56         |
| SH3YL1          | SH3 domain containing, Ys     | chr2p25.3            | phosphatidylinositol biosynthetic process  | ---                                       | 1.31          | 1.31            | 1.28      | 1.31        | -1.06     | 1.14        | -1.31      | -1.10        | -1.29      | -1.19        | 1.16       | 1.27         |
| SHARPIN         | SHANK-associated RH dom       | chr8q24.3            | mitochondrion organization                 | ---                                       | -1.02         | -1.00           | -1.04     | -1.05       | -1.02     | -1.07       | 1.04       | 1.18         | -1.20      | -1.50        | -1.34      | -1.43        |
| SHB             | Src homology 2 domain co      | chr9p13.2            | angiogenesis                               | ---                                       | 1.02          | -1.21           | 1.43      | 1.16        | 1.13      | 1.01        | 1.54       | 1.43         | 3.27       | 2.66         | 2.01       | 2.70         |
| SHB             | Src homology 2 domain co      | chr9p13.2            | angiogenesis                               | ---                                       | 1.02          | 1.08            | 1.08      | 1.12        | 1.19      | 1.05        | 1.60       | 1.20         | 2.94       | 2.54         | 1.19       | 1.77         |
| SHB             | Src homology 2 domain co      | chr9p13.2            | angiogenesis                               | ---                                       | 1.15          | -1.14           | -1.05     | -1.00       | 1.15      | -1.03       | 1.36       | 1.28         | 2.64       | 2.66         | 1.44       | 1.74         |
| SHB             | Src homology 2 domain co      | chr9p13.2            | angiogenesis                               | ---                                       | -1.02         | 1.15            | 1.10      | 1.21        | 1.03      | 1.06        | 1.56       | 1.16         | 5.39       | 4.52         | 1.98       | 2.31         |
| SHC1            | SHC (Src homology 2 dom       | chr1q21              | MAPK cascade                               | Integrin-mediated_cell_adhesion_KEGG // C | -1.07         | -1.10           | 1.08      | -1.03       | 1.10      | 1.05        | 1.03       | 1.16         | 1.93       | 1.70         | 1.42       | 1.39         |
| SHC1            | SHC (Src homology 2 dom       | chr1q21              | MAPK cascade                               | Integrin-mediated_cell_adhesion_KEGG // C | -1.09         | -1.05           | -1.00     | 1.06        | 1.01      | -1.04       | 1.19       | 1.09         | 1.76       | 1.47         | 1.43       | 1.45         |
| SHC1P1 /// SHC1 | SHC (Src homology 2 dom       | ---                  | 0                                          | ---                                       | -1.60         | -1.35           | -1.17     | 1.63        | -1.94     | -1.14       | 1.25       | 2.78         | 2.12       | 1.31         | 1.38       | 1.34         |
| SHC3            | SHC (Src homology 2 dom       | chr9q22.1            | transmembrane receptor protein tyrosine    | Integrin-mediated_cell_adhesion_KEGG // C | -1.34         | -1.70           | -2.14     | -1.82       | 1.31      | 1.26        | -1.47      | -1.52        | -1.21      | -1.62        | -2.49      | -1.75        |
| SHCBP1          | SHC SH2-domain binding        | chr16q11.2           | fibroblast growth factor receptor signalin | ---                                       | 1.04          | -1.09           | -1.08     | -1.04       | -1.17     | 1.21        | -1.23      | -1.07        | 1.19       | 1.46         | 1.05       | 1.21         |
| SHISA3          | shisa homolog 3 (Xenopus      | chr4p13              | multicellular organismal development       | ---                                       | 1.30          | 1.22            | 1.81      | 2.91        | -1.29     | 1.51        | -1.21      | 2.27         | 2.64       | 1.87         | 1.42       | 1.42         |
| SHISA4          | shisa homolog 4 (Xenopus      | chr1q32.1            | 0                                          | ---                                       | 1.22          | 1.84            | -1.34     | -1.14       | -1.05     | 1.26        | -1.09      | -1.01        | -1.22      | -1.71        | 1.17       | 1.30         |
| SHISA5          | shisa homolog 5 (Xenopus      | chr3p21.31           | apoptotic process                          | ---                                       | -1.05         | -1.02           | -1.04     | -1.04       | -1.04     | -1.03       | 1.08       | -1.01        | 1.38       | 1.22         | 1.15       | 1.14         |
| SHMT1           | serine hydroxymethyltransf    | chr17p11.2           | L-serine catabolic process                 | ---                                       | -1.14         | -1.08           | 1.03      | -1.12       | -1.01     | -1.03       | -1.01      | -1.02        | -1.45      | -1.18        | -1.17      | -1.21        |
| SHMT1           | serine hydroxymethyltransf    | chr17p11.2           | glycine metabolic process                  | ---                                       | -1.10         | -1.00           | -1.03     | -1.12       | 1.02      | 1.02        | 1.03       | 1.02         | -1.24      | -1.13        | -1.19      | -1.16        |
| SHMT1           | serine hydroxymethyltransf    | chr17p11.2           | glycine metabolic process                  | ---                                       | 1.17          | 1.01            | 1.23      | -2.82       | -1.88     | 1.02        | 1.46       | 1.24         | -2.02      | 1.23         | -1.22      | 1.08         |
| SHOC2           | soc-2 suppressor of clear h   | chr10q25             | Ras protein signal transduction            | ---                                       | 1.14          | 1.20            | -1.04     | -1.08       | -1.16     | -1.03       | -1.20      | -1.12        | -1.33      | -1.24        | -1.25      | -1.50        |
| SHOX2           | short stature homeobox 2      | chr3q25.32           | negative regulation of transcription from  | ---                                       | 1.10          | -1.05           | -1.77     | -1.35       | 1.03      | 1.43        | 1.11       | 1.23         | 1.29       | -1.01        | 1.18       | 1.32         |
| SHPRH           | SNF2 histone linker PHD       | chr6q24.3            | DNA repair                                 | ---                                       | 1.44          | 1.21            | 1.01      | 1.08        | -1.01     | -1.13       | -1.03      | -1.13        | -2.01      | -1.58        | -1.55      | -1.62        |
| SHQ1            | SHQ1, H/ACA ribonucleop       | chr3p13              | ribonucleoprotein complex assembly         | ---                                       | -1.05         | 1.03            | -1.00     | -1.05       | -1.04     | -1.10       | -1.07      | -1.05        | -1.17      | -1.17        | 1.01       | -1.12        |
| SIAE            | sialic acid acetyltransferase | chr11q24             | 0                                          | ---                                       | 1.06          | -1.04           | 1.10      | 1.17        | -1.00     | 1.01        | 1.07       | -1.02        | -1.21      | -1.12        | -1.43      | -1.21        |
| SIAE            | sialic acid acetyltransferase | chr11q24             | 0                                          | ---                                       | -1.41         | -1.17           | 1.13      | -1.01       | 1.31      | -1.03       | 1.21       | 1.44         | -2.22      | -2.63        | -14.28     | -8.38        |
| SIAH2           | siah E3 ubiquitin protein li  | chr3q25              | ubiquitin-dependent protein catabolic pro  | ---                                       | -1.10         | -1.06           | 1.17      | 1.05        | -1.07     | -1.07       | -1.09      | -1.12        | 1.30       | 1.39         | 1.33       | 1.48         |
| SIDT2           | SID1 transmembrane fami       | chr11q23.3           | RNA interference                           | ---                                       | -1.03         | -1.01           | -1.08     | -1.02       | -1.26     | -1.04       | 1.03       | 1.24         | 1.13       | 1.16         | -1.13      | 1.24         |
| SIDT2           | SID1 transmembrane fami       | chr11q23.3           | RNA interference                           | ---                                       | -1.16         | -1.30           | -1.11     | -1.08       | -1.10     | 1.10        | -1.03      | 1.16         | -1.01      | 1.18         | -1.02      | 1.33         |
| SIGIRR          | single immunoglobulin and     | chr11p15.5           | negative regulation of cytokine-mediated   | ---                                       | -1.36         | -1.36           | 1.08      | -1.01       | 1.18      | -1.04       | 1.20       | 1.13         | 1.66       | 1.34         | 1.40       | 1.45         |
| SIGIRR          | single immunoglobulin and     | chr11p15.5           | negative regulation of cytokine-mediated   | ---                                       | -1.32         | -1.24           | -1.06     | -1.04       | 1.18      | -1.02       | 1.07       | 1.02         | 1.50       | 1.25         | 1.56       | 1.57         |
| SIGLEC6         | sialic acid binding Ig-like   | chr19q13.3           | cell adhesion                              | ---                                       | 3.98          | -1.50           | -1.73     | -2.77       | -1.14     | -1.30       | -5.05      | -1.34        | -1.13      | 1.05         | 2.66       | 2.16         |
| SIGLEC9         | sialic acid binding Ig-like   | chr19q13.41          | cell adhesion                              | ---                                       | 1.04          | 3.64            | 1.69      | -1.13       | -1.37     | 3.36        | -1.23      | -1.48        | 1.77       | -1.92        | -1.16      | -1.37        |
| SIK1            | salt-inducible kinase 1       | chr21q22.3           | negative regulation of transcription from  | ---                                       | -1.32         | -1.08           | 1.70      | 2.50        | -2.96     | -1.03       | 2.24       | 3.38         | 12.95      | 7.96         | 3.49       | 3.55         |
| SIK2            | salt-inducible kinase 2       | chr11q23.1           | protein phosphorylation                    | ---                                       | 1.02          | 1.03            | 1.02      | 1.15        | 1.06      | 1.08        | 1.27       | 1.07         | 1.48       | 1.37         | 1.31       | 1.27         |
| SIK2            | salt-inducible kinase 2       | chr11q23.1           | protein phosphorylation                    | ---                                       | 1.11          | 1.09            | 1.30      | 1.21        | -1.14     | 1.24        | -1.36      | -1.06        | -1.76      | -1.58        | -1.42      | -1.65        |
| SIK3            | SIK family kinase 3           | chr11q23.3           | protein phosphorylation                    | ---                                       | 1.09          | 1.22            | 1.04      | -1.10       | 1.13      | 1.01        | -1.69      | -1.39        | -3.41      | -2.76        | -2.59      | -2.34        |
| SIK3            | SIK family kinase 3           | chr11q23.3           | protein phosphorylation                    | ---                                       | 1.05          | 1.03            | 1.03      | -1.13       | 1.00      | -1.08       | -1.29      | -1.09        | -3.20      | -2.50        | -2.85      | -3.09        |
| SIK3            | SIK family kinase 3           | chr11q23.3           | protein phosphorylation                    | ---                                       | 1.29          | 1.23            | 1.07      | -1.22       | 1.03      | -1.03       | -1.23      | -1.20        | -6.02      | -4.72        | -3.26      | -3.30        |
| SIKE1           | suppressor of IKBKE 1         | chr1p13.2            | innate immune response                     | ---                                       | 1.29          | 1.11            | 1.21      | -1.04       | 1.05      | 1.03        | -1.08      | -1.01        | -1.83      | -2.17        | -2.10      | -2.43        |
| SIKE1           | suppressor of IKBKE 1         | chr1p13.2            | innate immune response                     | ---                                       | -1.30         | -1.37           | 1.18      | 1.14        | 1.39      | 1.10        | 1.12       | 1.00         | -2.41      | -1.70        | -1.52      | -1.53        |
| SIKE1           | suppressor of IKBKE 1         | chr1p13.2            | innate immune response                     | ---                                       | -1.09         | -1.29           | -1.02     | 1.15        | 1.18      | 1.07        | 1.31       | 1.17         | 1.92       | 1.87         | 3.09       | 3.01         |
| SIL1            | SIL1 homolog, endoplasmic     | chr5q31              | protein folding                            | ---                                       | -1.07         | -1.13           | -1.08     | 1.10        | 1.01      | -1.21       | 1.09       | 1.19         | 1.43       | 1.09         | 1.51       | 1.80         |
| SIM1            | single-minded homolog 1 (     | chr6q16.3-q21        | ureteric bud development                   | ---                                       | -1.61         | 2.05            | 1.95      | 1.77        | -1.39     | 2.33        | -1.78      | -3.37        | 1.43       | -1.03        | 2.43       | 3.69         |
| SIM1            | single-minded homolog 1 (     | chr6q16.3-q21        | ureteric bud development                   | ---                                       | 1.26          | 1.83            | 1.57      | 1.24        | 4.16      | 2.61        | 4.32       | 1.34         | 3.07       | 1.32         | 1.39       | 1.88         |
| SIM2            | single-minded homolog 2 (     | chr21q22.13          | negative regulation of transcription from  | ---                                       | -1.00         | 1.01            | 1.01      | 1.03        | 1.09      | 1.03        | 1.06       | -1.03        | 1.31       | 1.12         | 1.85       | 1.71         |
| SIM2            | single-minded homolog 2 (     | chr21q22.13          | negative regulation of transcription from  | ---                                       | -1.02         | -1.17           | 1.06      | 1.41        | -1.07     | -1.29       | 1.21       | 1.05         | 2.45       | 1.99         | 1.39       | 1.54         |
| SIN3A           | SIN3 transcription regulato   | chr15q24.2           | negative regulation of transcription from  | ---                                       | 1.09          | 1.04            | 1.01      | -1.09       | -1.00     | -1.01       | -1.07      | 1.13         | -2.01      | -1.78        | -2.66      | -3.00        |
| SIN3A           | SIN3 transcription regulato   | chr15q24.2           | negative regulation of transcription from  | ---                                       | 1.07          | 1.08            | 1.03      | 1.08        | -1.01     | 1.01        | -1.20      | -1.00        | -1.98      | -1.83        | -2.46      | -2.67        |
| SIN3B           | SIN3 transcription regulato   | chr19p13.11          | transcription, DNA-dependent               | ---                                       | 1.12          | 1.21            | 1.11      | 1.10        | -1.02     | 1.03        | -1.20      | -1.04        | -1.40      | -1.34        | -1.12      | -1.08        |
| SIN3B           | SIN3 transcription regulato   | chr19p13.11          | transcription, DNA-dependent               | ---                                       | 1.03          | 1.04            | 1.06      | 1.07        | 1.02      | 1.01        | 1.05       | 1.06         | -1.37      | -1.57        | -1.05      | 1.03         |
| SIPA1           | signal-induced proliferation  | chr11q13             | cytoskeleton organization                  | MAPK_Cascade // GenMAPP                   | 1.06          | 1.11            | 1.21      | 1.22        | 1.05      | -1.21       | 1.20       | 1.29         | 2.02       | 1.63         | 1.17       | 1.24         |
| SIPA1L1         | signal-induced proliferation  | chr14q24.2           | actin cytoskeleton reorganization          | ---                                       | 1.03          | -1.03           | 1.06      | 1.15        | -1.07     | -1.05       | 1.19       | 1.13         | -1.05      | -1.44        | -1.08      | -1.16        |
| SIPA1L1         | signal-induced proliferation  | chr14q24.2           | actin cytoskeleton reorganization          | ---                                       | 1.26          | 1.03            | 1.04      | -1.05       | 1.06      | 1.14        | -1.18      | -1.04        | -1.73      | -1.96        | -2.36      | -2.36        |
| SIPA1L1         | signal-induced proliferation  | chr14q24.2           | actin cytoskeleton reorganization          | ---                                       | 1.06          | -1.04           | 1.08      | 1.16        | -1.24     | -1.04       | -1.39      | -1.15        | -3.88      | -3.33        | -2.16      | -2.63        |
| SIPA1L2         | signal-induced proliferation  | chr1q42.2            | positive regulation of GTPase activity     | ---                                       | 1.11          | -1.02           | 1.11      | 1.26        | 1.12      | 1.18        | -1.33      | 1.12         | 1.21       | 1.22         | 1.72       | 1.31         |
| SIPA1L2         | signal-induced proliferation  | chr1q42.2            | positive regulation of GTPase activity     | ---                                       | -1.24         | -1.21           | 1.08      | 1.01        | 1.07      | 1.05        | -1.47      | -1.11        | 1.87       | 1.34         | 3.47       | 3.27         |
| SIPA1L2         | signal-induced proliferation  | chr1q42.2            | positive regulation of GTPase activity     | ---                                       | -1.05         | 1.00            | -1.12     | -1.24       | -1.32     | -1.16       | -1.15      | -1.15        | 1.73       | 1.42         | 2.62       | 2.66         |
| SIRPA           | signal-regulatory protein al  | chr20p13             | cell adhesion                              | ---                                       | -1.12         | -1.08           | -1.08     | 1.06        | 1.26      | 1.31        | -1.42      | 1.01         | 1.15       | -1.32        | 1.26       | 1.13         |
| SIRT3           | sirtuin 3                     | chr11p15.5           | protein ADP-ribosylation                   | ---                                       | 1.38          | 1.34            | -1.07     | 1.11        | 1.04      | 1.05        | 1.16       | 1.05         | -1.09      | -1.19        | -2.21      | -1.51        |
| SIRT3           | sirtuin 3                     | chr11p15.5           | protein ADP-ribosylation                   | ---                                       | -1.07         | -1.18           | 1.26      | 1.47        | -1.24     | -1.13       | 1.10       | 1.17         | -1.17      | -1.31        | -1.51      | -1.17        |
| SIRT4           | sirtuin 4                     | chr12q               | chromatin silencing                        | ---                                       | 2.73          | 1.32            | 4.29      | 2.31        | 5.25      | 1.69        | -3.41      | -3.49        | -1.76      | -1.62        | 1.65       | 1.36         |
| SIRT5           | sirtuin 5                     | chr6p23              | chromatin silencing                        | ---                                       | 1.12          | 1.09            | -1.06     | -1.07       | 1.29      | -1.14       | 1.14       | -1.03        | -1.42      | -1.37        | 1.02       | 1.33         |
| SIRT6           | sirtuin 6                     | chr19p13.3           | protein ADP-ribosylation                   | ---                                       | -1.03         | -1.05           | 1.11      | 1.09        | 1.05      | -1.03       | 1.18       | 1.14         | 1.58       | 1.32         | 1.72       | 1.64         |
| SIRT6           | sirtuin 6                     | chr19p13.3           | protein ADP-ribosylation                   | ---                                       | -1.05         | -1.24           | -1.01     | -1.12       | -1.11     | -1.03       | -1.10      | -1.12        | 1.23       | 1.08         | 1.23       | 1.14         |
| SIRT7           | sirtuin 7                     | chr17q25             | negative regulation of transcription from  | ---                                       | 1.01          | -1.05           | -1.13     | -1.12       | 1.06      | 1.13        | -1.04      | -1.25        | 1.36       | 1.06         | 1.13       | 1.05         |
| SIVA1           | SIVA1, apoptosis-inducing     | chr14q32.33          | apoptotic process                          | ---                                       | 1.08          | 1.70            | -1.11     | 1.14        | 1.03      | -1.04       | 1.55       | 1.13         | -1.12      | -1.34        | -2.26      | -1.78        |
| SIX1            | SIX homeobox 1                | chr14q23.1           | negative regulation of transcription from  | ---                                       | -1.07         | -1.11           | -1.00     | -1.00       | -1.17     | 1.00        | -1.10      | 1.03         | -1.19      | -1.01        | -1.09      | -1.23        |

| ID      | Gene Title                                           | Chromosomal Location | 1st Gene Ontology Biological Process             | Pathway                               | A2497 30 mins | A2497P' 30 mins | A2497 2 h | A2497P' 2 h | A2497 4 h | A2497P' 4 h | A2497 24 h | A2497P' 24 h | A2497 48 h | A2497P' 48 h | A2497 72 h | A2497P' 72 h |
|---------|------------------------------------------------------|----------------------|--------------------------------------------------|---------------------------------------|---------------|-----------------|-----------|-------------|-----------|-------------|------------|--------------|------------|--------------|------------|--------------|
| SIX2    | SIX homeobox 2                                       | chr2p21              | metanephros development                          | ---                                   | -1.05         | -1.14           | -1.11     | -1.09       | 1.10      | 1.01        | -1.01      | 1.01         | -1.32      | -1.29        | -1.45      | -1.68        |
| SIX2    | SIX homeobox 2                                       | chr2p21              | metanephros development                          | ---                                   | 1.18          | 1.16            | 1.22      | 1.11        | -1.16     | 1.07        | 1.23       | 1.22         | 1.23       | 1.03         | -1.42      | -1.92        |
| SIX4    | SIX homeobox 4                                       | chr14q23             | regulation of transcription, DNA-depend          | ---                                   | -1.45         | -1.42           | 1.31      | -1.10       | 1.70      | 1.81        | -1.48      | -1.21        | 1.00       | -1.36        | 3.63       | 1.34         |
| SIX4    | SIX homeobox 4                                       | chr14q23             | regulation of transcription, DNA-depend          | ---                                   | 1.35          | 1.27            | 1.02      | -1.18       | -1.07     | -1.02       | -1.03      | -1.06        | 1.20       | 1.05         | 1.79       | 1.74         |
| SKA2    | spindle and kinetochore associ                       | chr17q22             | M phase of mitotic cell cycle                    | ---                                   | -1.00         | -1.01           | -1.01     | 1.02        | 1.01      | 1.03        | 1.10       | 1.18         | 1.21       | 1.16         | 1.24       | 1.28         |
| SKA2    | spindle and kinetochore associ                       | chr17q22             | M phase of mitotic cell cycle                    | ---                                   | 1.12          | 1.09            | -1.13     | -1.10       | -1.21     | 1.00        | -1.24      | -1.19        | -1.39      | -1.14        | -1.36      | -1.44        |
| SKA3    | spindle and kinetochore associ                       | chr13q12.11          | cell cycle                                       | ---                                   | 1.13          | 1.13            | 1.06      | 1.08        | 1.04      | 1.06        | -1.28      | -1.15        | -1.40      | -1.72        | -1.08      | -1.19        |
| SKAP1   | src kinase associated phosphatase                    | chr17q21.32          | positive regulation of transcription, DNA-depend | ---                                   | 1.53          | -1.22           | -1.20     | -1.02       | -3.22     | -1.57       | -2.95      | 1.25         | -1.40      | -1.22        | 2.13       | 1.88         |
| SKI     | v-ski sarcoma viral oncogene homolog                 | chr1p36.33           | negative regulation of transcription from TGF_   | TGF_Beta_Signaling_Pathway // GenMAPP | 1.01          | 1.00            | 1.04      | -1.01       | -1.20     | -1.11       | -1.10      | 1.01         | -1.01      | -1.12        | -1.29      | -1.22        |
| SKIL    | SKI-like oncogene                                    | chr3q26              | negative regulation of transcription from TGF_   | TGF_Beta_Signaling_Pathway // GenMAPP | -1.04         | -1.05           | 1.64      | 2.00        | -1.26     | -1.11       | 1.32       | 1.37         | 1.68       | -1.12        | 1.74       | 1.06         |
| SKIL    | SKI-like oncogene                                    | chr3q26              | negative regulation of transcription from TGF_   | TGF_Beta_Signaling_Pathway // GenMAPP | 1.02          | 1.17            | 1.26      | -1.03       | 1.28      | -1.23       | 1.11       | -1.19        | -1.08      | -1.46        | 1.76       | 1.45         |
| SKIL    | SKI-like oncogene                                    | chr3q26              | negative regulation of transcription from TGF_   | TGF_Beta_Signaling_Pathway // GenMAPP | -1.24         | -1.30           | -1.02     | -1.50       | 1.31      | 1.35        | 1.00       | -1.16        | -1.80      | -1.74        | -1.21      | -1.60        |
| SKIV2L  | superkiller viralicidic activator                    | chr6p21              | 0                                                | ---                                   | -1.13         | -1.07           | -1.30     | -1.28       | 1.01      | 1.22        | -1.06      | -1.24        | 1.05       | 1.26         | 1.16       | 1.06         |
| SKIV2L  | superkiller viralicidic activator                    | chr5q11.2            | mRNA splicing, via spliceosome                   | ---                                   | -1.03         | 1.02            | -1.11     | -1.10       | -1.08     | -1.00       | 1.03       | -1.46        | -1.22      | -1.20        | -1.17      | -1.17        |
| SKP1    | S-phase kinase-associated protein                    | chr5q31              | G1 phase of mitotic cell cycle                   | ---                                   | 1.02          | 1.01            | -1.01     | -1.04       | 1.01      | 1.03        | 1.02       | -1.05        | 1.02       | 1.02         | -1.10      | -1.13        |
| SKP1    | S-phase kinase-associated protein                    | chr5q31              | G1 phase of mitotic cell cycle                   | ---                                   | 1.01          | 1.06            | -1.05     | -1.04       | -1.21     | -1.09       | -1.18      | -1.09        | -1.45      | -1.17        | -1.49      | -1.70        |
| SKP1    | S-phase kinase-associated protein                    | chr5q31              | G1 phase of mitotic cell cycle                   | ---                                   | -1.08         | -1.03           | -1.05     | 1.01        | -1.11     | -1.08       | -1.36      | -1.09        | -1.55      | -1.28        | -1.41      | -1.51        |
| SKP2    | S-phase kinase-associated protein                    | chr5p13              | G1 phase of mitotic cell cycle                   | Cell_cycle_KEGG // GenMAPP            | 1.11          | 1.05            | -1.09     | -1.20       | -1.18     | -1.15       | 1.01       | -1.08        | 1.77       | 1.71         | 1.72       | 1.67         |
| SKP2    | S-phase kinase-associated protein                    | chr5p13              | G1 phase of mitotic cell cycle                   | Cell_cycle_KEGG // GenMAPP            | 1.17          | 1.18            | 1.15      | -1.11       | 1.22      | 1.17        | -1.21      | -1.08        | -1.96      | -1.58        | -2.57      | -2.70        |
| SKP2    | S-phase kinase-associated protein                    | chr5p13              | G1 phase of mitotic cell cycle                   | Cell_cycle_KEGG // GenMAPP            | -1.02         | 1.01            | -1.01     | -1.03       | -1.01     | -1.07       | -1.03      | -1.03        | -1.04      | -1.16        | -1.23      | -1.28        |
| SLAIN1  | SLAIN motif family, member                           | chr13q22.3           | 0                                                | ---                                   | 1.13          | -1.04           | 1.12      | -1.13       | -1.06     | 1.22        | -2.09      | -1.29        | -1.89      | -1.53        | -2.92      | -2.54        |
| SLAIN2  | SLAIN motif family, member                           | chr4p11              | microtubule nucleation                           | ---                                   | -1.09         | -1.03           | 1.01      | -1.07       | 1.22      | -1.03       | -1.02      | -1.32        | 1.02       | -1.21        | 1.57       | 1.28         |
| SLAIN2  | SLAIN motif family, member                           | chr4p11              | microtubule nucleation                           | ---                                   | 1.73          | -1.06           | -1.10     | -1.09       | 1.43      | 1.29        | -1.72      | 2.04         | -1.70      | 1.25         | 1.02       | 1.31         |
| SLC11A2 | solute carrier family 11 (polyspecific)              | chr12q13             | transition metal ion transport                   | ---                                   | 1.05          | 1.04            | -1.03     | 1.23        | -1.05     | 1.09        | -1.31      | 1.11         | -1.32      | -1.06        | 1.04       | -1.01        |
| SLC11A2 | solute carrier family 11 (polyspecific)              | chr12q13             | response to hypoxia                              | ---                                   | 1.05          | 1.09            | 1.05      | 1.09        | 1.02      | 1.02        | -1.15      | 1.05         | -1.14      | 1.01         | 1.23       | 1.29         |
| SLC11A2 | solute carrier family 11 (polyspecific)              | chr12q13             | transition metal ion transport                   | ---                                   | -1.20         | -1.25           | 1.00      | 1.27        | -1.09     | -1.21       | 1.04       | 1.14         | 1.15       | 1.20         | 1.43       | 3.81         |
| SLC12A2 | solute carrier family 12 (sodium-dependent)          | chr5q23.3            | transport                                        | ---                                   | -1.09         | 1.01            | 1.03      | -1.05       | -1.01     | -1.13       | 1.09       | 1.10         | -1.59      | -1.64        | -1.31      | -1.90        |
| SLC12A2 | solute carrier family 12 (sodium-dependent)          | chr5q23.3            | transport                                        | ---                                   | -1.03         | 1.05            | 1.09      | 1.05        | 1.15      | 1.11        | -1.09      | -1.34        | -1.58      | -1.43        | 1.31       | -1.06        |
| SLC12A3 | solute carrier family 12 (sodium-dependent)          | chr16q13             | transport                                        | ---                                   | 1.13          | 1.09            | 1.07      | -1.01       | 1.01      | 1.01        | 1.14       | -1.01        | -1.75      | -1.61        | -3.54      | -2.91        |
| SLC12A3 | solute carrier family 12 (sodium-dependent)          | chr16q13             | transport                                        | ---                                   | -1.18         | -1.05           | 1.06      | -1.15       | -1.08     | 1.24        | -1.10      | 1.12         | -2.11      | -1.20        | -2.39      | -2.21        |
| SLC12A3 | solute carrier family 12 (sodium-dependent)          | chr16q13             | transport                                        | ---                                   | 1.00          | 1.00            | -1.01     | 1.13        | -1.66     | -1.15       | 1.05       | 1.03         | -2.43      | -2.30        | -3.28      | -2.20        |
| SLC12A4 | solute carrier family 12 (potassium-dependent)       | chr16q22.1           | transport                                        | ---                                   | 1.08          | 1.29            | 1.98      | 1.56        | 1.11      | -1.47       | 1.51       | 1.04         | 1.06       | -1.09        | 1.74       | 2.22         |
| SLC12A4 | solute carrier family 12 (potassium-dependent)       | chr16q22.1           | transport                                        | ---                                   | -1.24         | -1.19           | 1.59      | 2.47        | 2.89      | 2.45        | 1.42       | 1.56         | 1.57       | 2.37         | 1.21       | 1.46         |
| SLC12A4 | solute carrier family 12 (potassium-dependent)       | chr16q22.1           | transport                                        | ---                                   | 1.11          | 1.15            | 1.05      | 1.11        | 1.03      | -1.05       | 1.15       | 1.16         | 1.79       | 1.79         | 1.41       | 1.52         |
| SLC12A6 | solute carrier family 12 (potassium-dependent)       | chr15q13             | angiogenesis                                     | ---                                   | 1.39          | 1.25            | 1.06      | -1.02       | -1.10     | -1.04       | -1.22      | -1.09        | -1.62      | -1.69        | -1.28      | -1.57        |
| SLC12A8 | solute carrier family 12 (potassium-dependent)       | chr3q21.2            | transport                                        | ---                                   | 1.14          | 1.04            | -1.07     | -1.07       | -1.12     | -1.10       | -1.20      | -1.04        | 1.15       | 1.26         | 1.23       | 1.42         |
| SLC12A9 | solute carrier family 12 (potassium-dependent)       | chr7q22              | transport                                        | ---                                   | -1.24         | -1.31           | 1.13      | 1.06        | -1.11     | -1.21       | 1.07       | -1.05        | -1.52      | -1.16        | -1.32      | 1.15         |
| SLC13A2 | solute carrier family 13 (sodium-dependent)          | chr17p13.2           | transport                                        | ---                                   | -1.03         | -1.56           | 1.46      | 1.11        | 1.43      | 3.11        | 1.31       | 1.16         | 2.18       | 1.22         | -1.34      | -2.97        |
| SLC13A3 | solute carrier family 13 (sodium-dependent)          | chr20q13.12          | transport                                        | ---                                   | -4.79         | -1.13           | -1.05     | 1.37        | 1.15      | -1.77       | 1.51       | -1.06        | 2.08       | -1.86        | 2.74       | 2.39         |
| SLC14A1 | solute carrier family 14 (uric acid)                 | chr18q11-q12         | transport                                        | ---                                   | 1.82          | 1.13            | 1.30      | -1.54       | 1.93      | 1.02        | -1.64      | -3.80        | -1.28      | -2.98        | -2.99      | -4.49        |
| SLC15A2 | solute carrier family 15 (H <sup>+</sup> -dependent) | chr3q13.33           | transport                                        | ---                                   | 1.19          | 1.14            | -1.15     | -1.31       | 1.06      | 1.10        | -1.30      | -1.25        | -4.27      | -2.19        | -1.84      | -1.47        |
| SLC15A2 | solute carrier family 15 (H <sup>+</sup> -dependent) | chr3q13.33           | transport                                        | ---                                   | 1.37          | 1.38            | 1.10      | -1.04       | -1.08     | 1.06        | -1.05      | -1.40        | -4.06      | -1.68        | -3.53      | -5.21        |
| SLC15A4 | solute carrier family 15, member                     | chr12q24.32          | transport                                        | ---                                   | 1.04          | -1.05           | 1.03      | -1.04       | 1.02      | -1.01       | 1.02       | 1.02         | 1.10       | 1.09         | 1.72       | 1.47         |
| SLC16A1 | solute carrier family 16, member                     | chr1p12              | pyruvate metabolic process                       | ---                                   | 1.15          | 1.16            | 1.02      | 1.17        | -1.02     | 1.19        | -1.09      | -1.04        | 1.21       | 1.45         | 1.29       | 1.48         |
| SLC16A1 | solute carrier family 16, member                     | chr1p12              | pyruvate metabolic process                       | ---                                   | 1.10          | 1.01            | 1.05      | 1.08        | -1.05     | -1.03       | 1.05       | 1.04         | 1.25       | 1.29         | 1.24       | 1.40         |
| SLC16A3 | solute carrier family 16, member                     | chr17q25             | pyruvate metabolic process                       | ---                                   | -1.16         | -1.18           | -1.01     | 1.02        | -1.03     | -1.08       | 1.11       | 1.13         | 1.55       | 1.43         | 1.32       | 1.67         |
| SLC16A3 | solute carrier family 16, member                     | chr17q25             | pyruvate metabolic process                       | ---                                   | -1.05         | -1.26           | 1.21      | 1.28        | 1.26      | 1.14        | -1.04      | 1.06         | 1.68       | 1.72         | 1.48       | 1.90         |
| SLC16A3 | solute carrier family 16, member                     | chr17q25             | pyruvate metabolic process                       | ---                                   | -1.11         | -1.09           | -1.12     | -1.05       | -1.22     | -1.02       | 1.11       | 1.30         | 1.18       | 1.37         | 1.25       | 1.56         |
| SLC16A4 | solute carrier family 16, member                     | chr1p13.3            | transport                                        | ---                                   | -1.03         | 2.09            | 1.39      | -1.11       | 1.73      | 2.25        | 2.23       | 1.85         | -1.13      | -1.75        | 1.30       | -1.29        |
| SLC16A5 | solute carrier family 16, member                     | chr17q25.1           | transport                                        | ---                                   | 1.18          | -1.01           | -1.07     | 1.10        | -1.00     | -1.03       | 1.29       | 1.11         | -1.36      | -1.67        | -1.74      | -1.87        |
| SLC16A5 | solute carrier family 16, member                     | chr17q25.1           | transport                                        | ---                                   | -1.10         | 1.08            | -1.04     | -1.03       | -1.16     | -1.18       | 1.25       | 1.40         | 1.35       | 1.00         | 1.50       | 1.75         |
| SLC16A6 | solute carrier family 16, member                     | chr17q24.2           | transport                                        | ---                                   | 1.14          | 1.11            | -1.04     | 1.01        | 1.05      | 1.10        | 1.27       | 1.09         | 1.24       | 1.18         | 1.14       | 1.02         |
| SLC16A7 | solute carrier family 16, member                     | chr12q13             | transport                                        | ---                                   | 1.06          | 1.18            | 1.06      | -1.02       | -1.02     | 1.14        | 1.13       | 1.11         | -1.00      | 1.12         | 1.14       | 1.13         |
| SLC16A9 | solute carrier family 16, member                     | chr10q21.2           | transport                                        | ---                                   | -1.23         | -1.42           | -1.24     | -1.10       | 1.31      | 1.45        | -1.02      | -1.13        | -2.19      | -1.45        | -1.69      | -1.73        |
| SLC17A2 | solute carrier family 17 (sodium-dependent)          | chr6p21.3            | phosphate-containing compound metabo             | ---                                   | -1.77         | 2.59            | -1.26     | 1.42        | 1.17      | 1.34        | -1.08      | 2.11         | 3.36       | 3.50         | -3.14      | 1.30         |
| SLC17A5 | solute carrier family 17 (amino acid)                | chr6q13              | transport                                        | ---                                   | 1.05          | -1.02           | 1.01      | -1.34       | -1.10     | 1.05        | -1.17      | -1.12        | 1.04       | 1.15         | 1.56       | 1.35         |
| SLC17A7 | solute carrier family 17 (sodium-dependent)          | chr19q13             | transport                                        | ---                                   | 1.06          | -1.19           | -1.30     | -2.59       | 1.52      | 2.04        | -1.95      | -2.70        | 1.57       | 1.13         | 1.46       | 1.75         |
| SLC17A9 | solute carrier family 17, member                     | chr20q13.33          | transport                                        | ---                                   | 2.27          | -1.25           | -1.31     | -2.24       | 4.22      | 4.95        | -1.59      | 1.06         | -1.40      | -1.86        | -1.98      | -1.38        |
| SLC18A2 | solute carrier family 18 (vesicular)                 | chr10q25             | response to amphetamine                          | ---                                   | 1.32          | 1.50            | 1.69      | 1.54        | 1.45      | 1.22        | -1.54      | 1.00         | 2.08       | 1.46         | 1.13       | 1.62         |
| SLC18B1 | solute carrier family 18, subfamily                  | chr6q22.3-q23.3      | transport                                        | ---                                   | 1.05          | -1.12           | 1.01      | 1.06        | -1.31     | -1.02       | -1.22      | -1.30        | -1.56      | -1.20        | -1.20      | -1.21        |
| SLC19A1 | solute carrier family 19 (folate)                    | chr21q22.3           | vitamin metabolic process                        | ---                                   | 1.13          | -1.01           | -1.15     | 1.00        | 1.20      | -1.05       | -1.01      | 1.01         | -1.64      | -1.53        | -1.44      | -2.02        |
| SLC19A1 | solute carrier family 19 (folate)                    | chr21q22.3           | vitamin metabolic process                        | ---                                   | -1.00         | -1.06           | -1.03     | 1.02        | 1.13      | -1.03       | 1.33       | 1.50         | -1.16      | -1.69        | -3.26      | -1.69        |
| SLC19A1 | solute carrier family 19 (folate)                    | chr21q22.3           | vitamin metabolic process                        | ---                                   | 1.06          | -1.23           | 1.13      | -1.86       | -1.72     | -1.13       | 1.18       | -1.30        | 1.17       | -1.16        | 1.04       | -1.06        |
| SLC19A1 | solute carrier family 19 (folate)                    | chr21q22.3           | vitamin metabolic process                        | ---                                   | 1.17          | -1.01           | -1.11     | 1.23        | 1.55      | 1.34        | 1.08       | -1.39        | -1.86      | -2.03        | -1.90      | -1.90        |
| SLC19A1 | solute carrier family 19 (folate)                    | chr21q22.3           | vitamin metabolic process                        | ---                                   | 1.03          | -1.10           | -1.07     | 1.00        | -1.14     | -1.07       | 1.03       | 1.22         | -1.38      | -1.46        | -1.59      | -1.62        |
| SLC19A3 | solute carrier family 19, member                     | chr2q37              | vitamin metabolic process                        | ---                                   | 1.16          | -1.62           | 1.83      | 2.45        | 2.76      | 2.97        | -2.60      | -1.26        | 3.94       | -1.10        | 2.86       | 1.11         |

| ID         | Gene Title                     | Chromosomal Location | 1st Gene Ontology Biological Process  | Pathway                                 | A2497 30 mins | A2497P' 30 mins | A2497 2 h | A2497P' 2 h | A2497 4 h | A2497P' 4 h | A2497 24 h | A2497P' 24 h | A2497 48 h | A2497P' 48 h | A2497 72 h | A2497P' 72 h |
|------------|--------------------------------|----------------------|---------------------------------------|-----------------------------------------|---------------|-----------------|-----------|-------------|-----------|-------------|------------|--------------|------------|--------------|------------|--------------|
| SLC1A1     | solute carrier family 1 (neu)  | chr9p24              | transport                             | ---                                     | 1.33          | 1.12            | -1.11     | -1.36       | -1.03     | -1.16       | 1.31       | -1.30        | 1.81       | 1.49         | 1.33       | 1.12         |
| SLC1A1     | solute carrier family 1 (neu)  | chr9p24              | transport                             | ---                                     | 1.10          | -1.03           | 1.15      | -1.01       | 1.33      | 1.16        | -1.01      | -1.07        | 1.08       | 1.20         | 1.40       | 1.37         |
| SLC1A2     | solute carrier family 1 (glia) | chr11p13-p12         | transport                             | ---                                     | -1.08         | -1.20           | 2.03      | 1.30        | 1.79      | 1.59        | 1.09       | 1.22         | -9.48      | -5.76        | -4.41      | -4.60        |
| SLC1A3     | solute carrier family 1 (glia) | chr5p13              | neurotransmitter uptake               | ---                                     | 1.01          | 1.04            | -1.00     | 1.01        | -1.20     | -1.13       | 1.16       | 1.11         | 1.28       | 1.32         | -1.02      | -1.01        |
| SLC1A4     | solute carrier family 1 (glut) | chr2p15-p13          | ion transport                         | ---                                     | -1.75         | -1.55           | 1.04      | -1.26       | 1.15      | 1.01        | -1.45      | -1.75        | -1.93      | -1.59        | -1.74      | -3.02        |
| SLC1A4     | solute carrier family 1 (glut) | chr2p15-p13          | transport                             | ---                                     | -1.01         | 1.08            | -1.08     | 1.05        | -1.06     | -1.09       | -1.08      | 1.15         | -1.29      | -1.48        | -1.28      | -1.05        |
| SLC1A4     | solute carrier family 1 (glut) | chr2p15-p13          | transport                             | ---                                     | -1.17         | -1.06           | -1.08     | -1.13       | 1.24      | 1.06        | -1.15      | -1.11        | -1.57      | -1.56        | -1.70      | -1.44        |
| SLC1A4     | solute carrier family 1 (glut) | chr2p15-p13          | transport                             | ---                                     | 1.01          | -1.02           | 1.01      | 1.10        | -1.03     | -1.25       | -1.08      | 1.07         | -1.19      | -1.45        | -1.32      | -1.02        |
| SLC1A5     | solute carrier family 1 (neu)  | chr19q13.3           | transport                             | ---                                     | 1.07          | -1.01           | -1.00     | 1.00        | 1.17      | 1.27        | -1.20      | -1.25        | 1.10       | -1.05        | 1.19       | 1.29         |
| SLC20A1    | solute carrier family 20 (ph)  | chr2q13              | phosphate-containing compound metabo  | ---                                     | 1.02          | -1.02           | -1.05     | 1.08        | -1.03     | 1.07        | 1.06       | -1.02        | 1.39       | 1.27         | 1.16       | 1.06         |
| SLC20A2    | solute carrier family 20 (ph)  | chr8p11.21           | transport                             | ---                                     | 1.06          | -1.02           | -1.18     | -2.03       | 1.01      | -1.17       | -1.00      | -1.16        | 1.31       | 1.17         | 1.37       | 1.11         |
| SLC22A18   | solute carrier family 22, me   | chr11p15.5           | transport                             | ---                                     | -1.05         | -1.11           | 1.04      | 1.13        | -1.00     | -1.10       | 1.40       | 1.38         | 1.64       | 1.56         | 1.91       | 2.51         |
| SLC22A18A5 | solute carrier family 22 (or)  | chr11p15.5           | 0                                     | ---                                     | 1.03          | 1.11            | 1.00      | -1.12       | 1.14      | 1.31        | -1.22      | -1.35        | 1.33       | -1.06        | 1.49       | 1.20         |
| SLC22A23   | solute carrier family 22, me   | chr6p25.2            | transport                             | ---                                     | -1.14         | -1.07           | 1.28      | 1.42        | -1.25     | -1.08       | -1.29      | -1.27        | 1.89       | 1.50         | 1.68       | 1.91         |
| SLC22A25   | solute carrier family 22, me   | chr11q12.3           | transport                             | ---                                     | -1.51         | -3.61           | 11.31     | -1.19       | 3.46      | 1.12        | 3.03       | 1.92         | 1.98       | 2.88         | 1.18       | 2.57         |
| SLC22A3    | solute carrier family 22 (ex)  | chr6q25.3            | transport                             | ---                                     | 1.16          | 1.14            | -1.09     | -1.33       | 1.19      | -1.05       | -1.46      | -1.22        | -3.08      | -1.41        | -1.94      | -1.31        |
| SLC22A4    | solute carrier family 22 (or)  | chr5q31.1            | triglyceride metabolic process        | ---                                     | -1.04         | -1.10           | -1.07     | -1.03       | -1.05     | 1.00        | 1.13       | 1.27         | -1.46      | -1.30        | -2.76      | -1.63        |
| SLC22A5    | solute carrier family 22 (or)  | chr5q23.3            | transport                             | ---                                     | 1.07          | 1.07            | 1.61      | 1.48        | 1.00      | -1.49       | 1.08       | 1.10         | 2.52       | 2.71         | 3.84       | 3.81         |
| SLC22A5    | solute carrier family 22 (or)  | chr5q23.3            | transport                             | ---                                     | -1.04         | 1.03            | -1.06     | -1.21       | -1.08     | 1.04        | -1.18      | -1.15        | -1.59      | -1.49        | -1.67      | -1.82        |
| SLC22A7    | solute carrier family 22 (or)  | chr6p21.1            | transport                             | ---                                     | 1.17          | 1.79            | -1.27     | -1.12       | -1.03     | -1.50       | 2.76       | 1.29         | 7.05       | 2.95         | 2.20       | 2.07         |
| SLC23A2    | solute carrier family 23 (nu)  | chr20p13             | nucleobase-containing compound metabo | ---                                     | -1.14         | -1.07           | 1.05      | 1.10        | 1.28      | -1.00       | -1.07      | 1.06         | -1.16      | -1.13        | -1.60      | -2.15        |
| SLC23A2    | solute carrier family 23 (nu)  | chr20p13             | nucleobase-containing compound metabo | ---                                     | 1.45          | 1.36            | 1.35      | 1.17        | 1.19      | -1.04       | -1.38      | 1.16         | -1.37      | -1.42        | -1.65      | -1.96        |
| SLC24A1    | solute carrier family 24 (so)  | chr15q22             | transport                             | ---                                     | -1.09         | 1.13            | 1.30      | 1.41        | 1.25      | 1.36        | -1.37      | -1.29        | -2.67      | -2.58        | -1.51      | -1.56        |
| SLC24A3    | solute carrier family 24 (so)  | chr20p13             | transport                             | ---                                     | 1.52          | -1.22           | -1.75     | -1.36       | -1.32     | 1.23        | 1.63       | -1.23        | -1.52      | -1.49        | 1.75       | 2.21         |
| SLC24A6    | solute carrier family 24 (so)  | chr12q24.13          | transport                             | ---                                     | -1.21         | -1.17           | -1.11     | -1.12       | 1.21      | 1.03        | 1.09       | 1.37         | 1.92       | 1.43         | 1.21       | 1.47         |
| SLC25A1    | solute carrier family 25 (mi)  | chr22q11.21          | carbohydrate metabolic process        | Fatty_Acid_Synthesis // GenMAPP         | -1.08         | -1.04           | -1.02     | 1.03        | 1.07      | -1.06       | 1.13       | -1.01        | 1.35       | 1.34         | 1.23       | 1.44         |
| SLC25A10   | solute carrier family 25 (mi)  | chr17q25.3           | sulfur amino acid metabolic process   | ---                                     | 1.01          | -1.04           | -1.13     | -1.01       | 1.10      | 1.02        | 1.13       | 1.17         | -1.07      | -1.04        | -1.55      | -1.59        |
| SLC25A12   | solute carrier family 25 (as)  | chr2q24              | carbohydrate metabolic process        | ---                                     | 1.12          | -1.02           | -1.04     | 1.10        | 1.08      | 1.04        | -1.21      | 1.04         | -1.61      | -1.49        | -1.44      | -1.57        |
| SLC25A12   | solute carrier family 25 (as)  | chr2q24              | carbohydrate metabolic process        | ---                                     | 1.02          | 1.07            | -1.01     | 1.05        | 1.10      | -1.04       | 1.15       | -1.01        | -1.33      | -1.37        | -1.33      | -1.35        |
| SLC25A13   | solute carrier family 25 (as)  | chr7q21.3            | carbohydrate metabolic process        | ---                                     | -1.10         | -1.09           | 1.02      | -1.01       | 1.11      | 1.08        | -1.31      | -1.16        | -1.64      | -1.45        | -2.06      | -2.14        |
| SLC25A13   | solute carrier family 25 (as)  | chr7q21.3            | carbohydrate metabolic process        | ---                                     | -1.25         | -1.22           | -1.11     | -1.16       | 1.04      | 1.14        | -1.28      | 1.19         | -1.52      | -1.50        | -1.87      | -2.12        |
| SLC25A13   | solute carrier family 25 (as)  | chr7q21.3            | carbohydrate metabolic process        | ---                                     | 1.01          | 1.05            | 1.02      | 1.00        | -1.05     | 1.01        | -1.12      | 1.12         | -2.11      | -1.81        | -2.52      | -2.71        |
| SLC25A14   | solute carrier family 25 (mi)  | chrXq24              | transport                             | Electron_Transport_Chain // GenMAPP     | -1.04         | -1.07           | -1.02     | 1.03        | -1.02     | -1.01       | -1.08      | -1.00        | -1.19      | -1.11        | -1.12      | -1.08        |
| SLC25A16   | solute carrier family 25 (mi)  | chr10q21.3           | vitamin metabolic process             | ---                                     | 1.10          | 1.06            | -1.05     | 1.03        | 1.09      | 1.07        | 1.32       | 1.15         | -1.67      | -1.50        | -2.11      | -1.85        |
| SLC25A16   | solute carrier family 25 (mi)  | chr10q21.3           | vitamin metabolic process             | ---                                     | 1.01          | -1.07           | 1.06      | 1.04        | 1.09      | 1.08        | -1.03      | 1.02         | -1.39      | -1.22        | -1.44      | -1.36        |
| SLC25A20   | solute carrier family 25 (ca)  | chr3p21.31           | transport                             | Fatty_Acid_Degradation // GenMAPP // Mi | -1.12         | -1.00           | -1.02     | 1.08        | 1.03      | 1.03        | 1.03       | 1.15         | -1.32      | -1.20        | -1.21      | -1.25        |
| SLC25A21-A | SLC25A21 antisense RNA         | chr14q13.3           | 0                                     | ---                                     | 1.48          | -1.01           | -1.05     | 1.91        | -1.28     | -1.04       | -1.50      | 1.01         | -2.30      | -2.78        | -4.32      | -3.55        |
| SLC25A22   | solute carrier family 25 (mi)  | chr11p15.5           | transport                             | ---                                     | 1.05          | 1.12            | -1.18     | -1.25       | -1.22     | -1.17       | 1.08       | 1.09         | 1.53       | 1.34         | 1.44       | 1.32         |
| SLC25A23   | solute carrier family 25 (mi)  | chr19p13.3           | transport                             | ---                                     | -1.06         | -1.05           | 1.01      | 1.12        | -1.05     | 1.02        | 1.08       | 1.05         | 1.09       | 1.16         | -1.24      | -1.00        |
| SLC25A23   | solute carrier family 25 (mi)  | chr19p13.3           | transport                             | ---                                     | 1.28          | 1.25            | -1.06     | -1.17       | 1.39      | 1.04        | 1.11       | 1.39         | -1.28      | 1.01         | -1.65      | -1.60        |
| SLC25A25   | solute carrier family 25 (mi)  | chr9q34.11           | transport                             | ---                                     | -1.08         | -1.07           | 1.11      | 1.08        | 1.10      | -1.06       | 1.14       | 1.08         | 1.66       | 1.13         | 2.02       | 1.57         |
| SLC25A26   | solute carrier family 25 (S)   | chr3p14.1            | transport                             | ---                                     | -1.10         | -1.05           | 1.02      | 1.01        | 1.06      | -1.06       | 1.17       | 1.08         | 1.23       | 1.08         | 1.28       | 1.31         |
| SLC25A28   | solute carrier family 25 (mi)  | chr10q24.2           | transport                             | ---                                     | -1.15         | -1.13           | 1.04      | 1.17        | -1.02     | 1.04        | 1.13       | 1.08         | 1.41       | 1.19         | 1.05       | 1.19         |
| SLC25A30   | solute carrier family 25, me   | chr13q14.13          | transport                             | ---                                     | -1.06         | 1.06            | -1.01     | -1.11       | 1.02      | 1.05        | -1.14      | -1.11        | 1.00       | 1.24         | 1.11       | 1.01         |
| SLC25A33   | solute carrier family 25 (py)  | chr1p36.22           | transport                             | ---                                     | 1.09          | -1.04           | 1.03      | 1.05        | -1.07     | -1.02       | 1.08       | 1.00         | 1.23       | 1.08         | 1.53       | 1.28         |
| SLC25A34   | solute carrier family 25, me   | chr1p36.21           | transport                             | ---                                     | 1.10          | -1.01           | -1.17     | 1.09        | -1.89     | 1.19        | -1.59      | -1.06        | -2.54      | -2.10        | -1.44      | 1.13         |
| SLC25A37   | solute carrier family 25 (mi)  | chr8p21.2            | transport                             | ---                                     | 1.01          | 1.01            | -1.06     | 1.12        | 1.18      | 1.16        | 1.45       | 1.52         | 2.22       | 2.36         | 1.76       | 2.01         |
| SLC25A37   | solute carrier family 25 (mi)  | chr8p21.2            | small molecule metabolic process      | ---                                     | 1.07          | 1.02            | 1.04      | 1.10        | 1.14      | 1.12        | 1.17       | -1.19        | 1.55       | 1.44         | 1.87       | 1.86         |
| SLC25A37   | solute carrier family 25 (mi)  | chr8p21.2            | transport                             | ---                                     | -1.02         | 1.04            | 1.11      | 1.07        | 1.16      | 1.19        | 1.28       | 1.04         | 1.42       | 1.54         | 1.26       | 1.47         |
| SLC25A37   | solute carrier family 25 (mi)  | chr8p21.2            | small molecule metabolic process      | ---                                     | 1.08          | -1.02           | 1.05      | 1.02        | 1.10      | 1.10        | 1.34       | 1.02         | 1.78       | 1.59         | 1.77       | 1.88         |
| SLC25A37   | solute carrier family 25 (mi)  | chr8p21.2            | transport                             | ---                                     | -1.07         | -1.07           | 1.24      | 1.35        | -1.22     | -1.25       | 1.42       | 1.54         | 1.97       | 2.08         | 1.32       | 1.58         |
| SLC25A37   | solute carrier family 25 (mi)  | chr8p21.2            | transport                             | ---                                     | 1.05          | -1.02           | 1.08      | 1.04        | 1.18      | 1.07        | 1.25       | -1.00        | 1.87       | 1.53         | 1.70       | 1.87         |
| SLC25A37   | solute carrier family 25 (mi)  | chr8p21.2            | transport                             | ---                                     | 1.01          | -1.11           | 1.05      | 1.07        | 1.19      | 1.14        | 1.14       | -1.05        | 2.05       | 1.71         | 1.74       | 1.76         |
| SLC25A37   | solute carrier family 25 (mi)  | chr8p21.2            | transport                             | ---                                     | 1.05          | 1.19            | 1.06      | 1.03        | 1.22      | 1.22        | 1.04       | 1.12         | 1.30       | 1.66         | -1.26      | -1.28        |
| SLC25A37   | solute carrier family 25 (mi)  | chr8p21.2            | transport                             | ---                                     | -1.01         | -1.11           | 1.03      | -1.05       | 1.07      | 1.18        | 1.05       | -1.22        | 1.64       | 1.65         | 1.89       | 2.04         |
| SLC25A4    | solute carrier family 25 (mi)  | chr4q35              | mitochondrial genome maintenance      | Electron_Transport_Chain // GenMAPP     | 1.05          | 1.07            | 1.09      | -1.05       | 1.03      | -1.14       | 1.33       | 1.03         | 1.23       | 1.34         | 1.03       | 1.16         |
| SLC25A40   | solute carrier family 25, me   | chr7q21.12           | transport                             | ---                                     | 1.06          | 1.04            | -1.01     | -1.25       | 1.39      | -1.16       | 1.77       | -1.08        | 1.63       | 2.11         | 1.73       | 1.61         |
| SLC25A42   | solute carrier family 25, me   | chr19p13.11          | transport                             | ---                                     | 1.38          | -1.91           | 1.05      | 1.19        | -2.73     | -1.29       | 1.85       | 1.24         | 1.68       | 1.31         | 1.17       | 2.47         |
| SLC25A42   | solute carrier family 25, me   | chr19p13.11          | transport                             | ---                                     | -1.08         | -1.18           | 1.16      | 1.14        | 1.02      | 1.14        | 1.23       | 1.13         | -1.12      | 1.24         | 1.28       | 1.60         |
| SLC25A44   | solute carrier family 25, me   | chr1q22              | transport                             | ---                                     | -1.05         | -1.04           | 1.03      | -1.06       | -1.10     | 1.03        | -1.22      | -1.11        | -1.13      | -1.11        | -1.12      | -1.07        |
| SLC25A45   | solute carrier family 25, me   | chr11q13.1           | transport                             | ---                                     | -1.09         | -1.03           | 1.08      | 1.17        | -1.02     | -1.07       | 1.28       | 1.18         | -2.27      | -1.87        | -1.78      | -1.89        |
| SLC25A46   | solute carrier family 25, me   | chr5q22.1            | transport                             | ---                                     | 1.72          | 1.75            | -1.06     | -1.22       | -1.24     | 1.00        | -1.64      | -1.04        | -1.78      | -1.85        | -1.75      | -2.19        |
| SLC25A46   | solute carrier family 25, me   | chr5q22.1            | transport                             | ---                                     | -1.08         | -1.09           | -1.01     | 1.04        | 1.03      | 1.07        | 1.01       | 1.03         | -1.56      | -1.22        | -1.44      | -1.47        |
| SLC25A51   | solute carrier family 25, me   | chr9p13.3-p12        | transport                             | ---                                     | 1.10          | 1.04            | 1.03      | -1.08       | -1.07     | -1.21       | -1.14      | -1.14        | -1.17      | -1.20        | -1.31      | -1.88        |
| SLC25A51   | solute carrier family 25, me   | chr9p13.3-p12        | transport                             | ---                                     | -1.07         | -1.13           | -1.12     | -1.17       | -1.22     | -1.16       | 1.26       | 1.26         | 1.64       | 1.60         | 1.90       | 2.00         |
| SLC25A53   | solute carrier family 25, me   | chrXq22.2            | transport                             | ---                                     | 2.05          | 1.47            | 1.63      | 2.48        | -1.29     | -2.85       | 1.46       | 1.29         | 8.03       | 14.44        | 1.06       | -1.52        |

| ID         | Gene Title                               | Chromosomal Location | 1st Gene Ontology Biological Process         | Pathway                             | A2497 30 mins | A2497P' 30 mins | A2497 2 h | A2497P' 2 h | A2497 4 h | A2497P' 4 h | A2497 24 h | A2497P' 24 h | A2497 48 h | A2497P' 48 h | A2497 72 h | A2497P' 72 h |
|------------|------------------------------------------|----------------------|----------------------------------------------|-------------------------------------|---------------|-----------------|-----------|-------------|-----------|-------------|------------|--------------|------------|--------------|------------|--------------|
| SLC25A5-AS | SLC25A5 antisense RNA                    | ---                  | 0                                            | Electron_Transport_Chain // GenMAPP | -1.12         | -1.56           | -1.02     | 1.09        | -1.32     | -1.03       | -1.02      | -1.12        | -2.04      | -1.50        | -2.90      | -1.99        |
| SLC25A6    | solute carrier family 25 (mitochondrial) | chrXp22.32 and Yp    | energy reserve metabolic process             | Electron_Transport_Chain // GenMAPP | -1.19         | -1.18           | -1.02     | 1.03        | 1.03      | -1.02       | 1.13       | 1.10         | 1.20       | 1.11         | -1.28      | -1.09        |
| SLC25A6    | solute carrier family 25 (mitochondrial) | chrXp22.32 and Yp    | energy reserve metabolic process             | Electron_Transport_Chain // GenMAPP | -1.16         | -1.08           | -1.01     | 1.01        | 1.04      | -1.06       | 1.20       | 1.13         | 1.38       | 1.09         | -1.08      | 1.06         |
| SLC26A2    | solute carrier family 26 (sulfate)       | chr5q31-q34          | ossification                                 | ---                                 | -1.03         | 1.01            | 1.10      | -1.30       | -1.21     | -1.10       | -1.53      | -1.14        | -2.40      | -2.19        | -1.80      | -1.83        |
| SLC26A2    | solute carrier family 26 (sulfate)       | chr5q31-q34          | ossification                                 | ---                                 | -1.29         | -1.15           | -1.02     | -1.01       | 1.28      | 1.22        | -1.07      | -1.25        | -2.23      | -2.14        | -1.63      | -1.77        |
| SLC26A2    | solute carrier family 26 (sulfate)       | chr5q31-q34          | ossification                                 | ---                                 | 1.10          | -1.00           | 1.01      | -1.10       | 1.15      | 1.23        | -1.29      | -1.08        | -2.45      | -2.17        | -1.98      | -1.98        |
| SLC26A6    | solute carrier family 26, member 6       | chr3p21.3            | transport                                    | ---                                 | 1.02          | -1.10           | 1.29      | 1.37        | 1.08      | 1.11        | 1.50       | 1.29         | 3.10       | 2.50         | 1.88       | 1.94         |
| SLC26A9    | solute carrier family 26, member 9       | chr1q32.1            | ion transport                                | ---                                 | 2.26          | 2.56            | -1.30     | -2.41       | -1.57     | -1.18       | 1.65       | 1.66         | 4.74       | 1.98         | 5.53       | 4.63         |
| SLC27A1    | solute carrier family 27 (fatty acid)    | chr19p13.11          | medium-chain fatty acid transport            | ---                                 | -1.34         | -1.21           | -1.29     | -1.45       | 1.14      | 1.46        | -1.27      | -1.50        | 1.14       | 1.34         | -1.05      | 1.29         |
| SLC27A2    | solute carrier family 27 (fatty acid)    | chr15q21.2           | very long-chain fatty acid metabolic process | ---                                 | 1.12          | 1.20            | 1.05      | -1.02       | 1.02      | -1.02       | 1.04       | 1.03         | 1.28       | 1.09         | 1.66       | 1.38         |
| SLC27A2    | solute carrier family 27 (fatty acid)    | chr15q21.2           | very long-chain fatty acid metabolic process | ---                                 | 1.08          | 1.15            | -1.03     | -1.08       | -1.07     | -1.12       | 1.03       | 1.25         | 1.11       | 1.46         | 1.32       | 1.32         |
| SLC27A3    | solute carrier family 27 (fatty acid)    | chr1q21.3            | lipid metabolic process                      | ---                                 | -1.24         | -1.16           | 1.06      | 1.15        | 1.01      | -1.19       | 1.27       | -1.09        | 1.36       | 1.41         | 1.18       | 1.51         |
| SLC27A4    | solute carrier family 27 (fatty acid)    | chr9q34.11           | very long-chain fatty acid metabolic process | ---                                 | 1.04          | -1.05           | 1.11      | 1.07        | 1.10      | 1.12        | -1.04      | -1.14        | -1.22      | -1.56        | -1.94      | -1.67        |
| SLC29A1    | solute carrier family 29 (nucleoside)    | chr6p21.1            | nucleobase-containing compound metabolism    | ---                                 | -1.07         | -1.05           | -1.04     | -1.13       | 1.07      | 1.01        | -1.02      | -1.18        | -1.18      | -1.22        | -1.22      | -1.22        |
| SLC29A3    | solute carrier family 29 (nucleoside)    | chr10q22.1           | transport                                    | ---                                 | 1.19          | 1.02            | -1.08     | -1.10       | 1.06      | -1.03       | 1.05       | -1.02        | -1.48      | -2.17        | -1.60      | -1.54        |
| SLC2A1     | solute carrier family 2 (facilitated)    | chr1p34.2            | carbohydrate metabolic process               | ---                                 | -1.04         | -1.12           | 1.04      | 1.04        | -1.11     | -1.05       | 1.15       | 1.10         | 2.04       | 2.41         | 2.74       | 3.48         |
| SLC2A1     | solute carrier family 2 (facilitated)    | chr1p34.2            | carbohydrate metabolic process               | ---                                 | -1.05         | -1.19           | 1.03      | -1.02       | 1.11      | -1.06       | 1.12       | 1.06         | 2.31       | 3.23         | 2.85       | 5.55         |
| SLC2A13    | solute carrier family 2 (facilitated)    | chr12q12             | transport                                    | ---                                 | -1.12         | -1.21           | 1.17      | 1.43        | 1.38      | 1.43        | 1.03       | -1.17        | -1.76      | -1.41        | -1.94      | -1.71        |
| SLC2A13    | solute carrier family 2 (facilitated)    | chr12q12             | transport                                    | ---                                 | 1.02          | 1.04            | 1.08      | 1.21        | 1.71      | 1.42        | 1.07       | -1.04        | -1.03      | 1.06         | 1.14       | 1.21         |
| SLC2A14    | solute carrier family 2 (facilitated)    | chr12p13.3           | carbohydrate metabolic process               | ---                                 | 1.14          | 1.21            | 1.05      | -1.06       | -1.07     | -1.09       | 1.45       | 1.14         | 1.71       | 1.68         | 1.94       | 2.18         |
| SLC2A14    | solute carrier family 2 (facilitated)    | chr12p13.3           | carbohydrate metabolic process               | ---                                 | 1.10          | 1.04            | 1.11      | 1.00        | -1.02     | 1.02        | 1.35       | 1.35         | 2.36       | 2.17         | 1.66       | 3.41         |
| SLC2A3     | solute carrier family 2 (facilitated)    | chr12p13.3           | carbohydrate metabolic process               | ---                                 | 1.52          | 1.22            | -1.04     | 1.04        | -1.03     | -1.02       | 1.32       | 1.04         | 1.75       | 1.61         | 1.71       | 2.14         |
| SLC2A3     | solute carrier family 2 (facilitated)    | chr12p13.3           | carbohydrate metabolic process               | ---                                 | 1.08          | -1.02           | 1.12      | 1.01        | 1.12      | 1.27        | 1.35       | 1.14         | 1.61       | 2.07         | 1.83       | 1.98         |
| SLC2A3     | solute carrier family 2 (facilitated)    | chr12p13.3           | carbohydrate metabolic process               | ---                                 | 1.08          | 1.09            | 1.10      | 1.03        | 1.03      | 1.08        | 1.46       | 1.17         | 2.36       | 2.19         | 2.58       | 2.52         |
| SLC2A4RG   | SLC2A4 regulator                         | chr20q13.33          | transcription, DNA-dependent                 | ---                                 | 1.15          | 1.01            | 1.00      | -1.11       | 1.08      | 1.00        | -1.04      | -1.08        | 1.63       | 1.48         | 1.07       | 1.12         |
| SLC2A4RG   | SLC2A4 regulator                         | chr20q13.33          | transcription, DNA-dependent                 | ---                                 | 1.05          | -1.04           | -1.06     | 1.01        | 1.08      | -1.19       | 1.08       | 1.20         | 1.34       | 1.19         | -1.00      | 1.03         |
| SLC2A6     | solute carrier family 2 (facilitated)    | chr9q34              | transport                                    | ---                                 | -1.01         | -1.15           | -1.18     | 1.14        | 1.03      | -1.17       | 1.04       | 1.25         | 1.40       | -1.09        | 1.96       | 1.68         |
| SLC2A8     | solute carrier family 2 (facilitated)    | chr9q33.3            | response to hypoxia                          | ---                                 | -1.04         | -1.21           | -1.00     | 1.12        | -1.12     | 1.01        | 1.08       | 1.17         | -1.08      | -1.30        | -1.51      | -1.28        |
| SLC30A1    | solute carrier family 30 (zinc)          | chr1q32.3            | in utero embryonic development               | ---                                 | 1.14          | 1.19            | 1.07      | -1.00       | 1.03      | 1.05        | 1.23       | -1.07        | 2.07       | 1.88         | 1.72       | 1.25         |
| SLC30A4    | solute carrier family 30 (zinc)          | chr15q21.11 15q21.1  | transport                                    | ---                                 | 1.24          | 1.21            | 1.22      | 1.07        | -1.01     | 1.01        | -1.35      | -1.02        | -1.93      | -1.71        | -1.36      | 1.03         |
| SLC30A4    | solute carrier family 30 (zinc)          | chr15q21.11 15q21.1  | transport                                    | ---                                 | -1.25         | -7.29           | 1.91      | -1.15       | -2.35     | -1.24       | 2.95       | 2.84         | 1.15       | 2.17         | -3.61      | -2.42        |
| SLC30A5    | solute carrier family 30 (zinc)          | chr5q12.1            | transport                                    | ---                                 | -1.00         | 1.07            | -1.01     | -1.05       | 1.04      | 1.01        | 1.02       | 1.03         | 1.09       | 1.18         | 1.48       | 1.53         |
| SLC30A5    | solute carrier family 30 (zinc)          | chr5q12.1            | transport                                    | ---                                 | 1.04          | 1.01            | -1.08     | -1.02       | -1.06     | 1.06        | -1.10      | 1.02         | 1.04       | 1.22         | 1.25       | 1.26         |
| SLC30A5    | solute carrier family 30 (zinc)          | chr5q12.1            | transport                                    | ---                                 | 1.11          | 1.07            | 1.02      | -1.16       | -1.05     | -1.08       | -1.17      | -1.03        | -1.04      | 1.05         | 1.53       | 1.39         |
| SLC30A6    | solute carrier family 30 (zinc)          | chr2p22.3            | transport                                    | ---                                 | 1.12          | 1.11            | 1.01      | -1.05       | 1.08      | 1.00        | -1.19      | -1.14        | -1.66      | -1.52        | -1.06      | -1.12        |
| SLC30A8    | solute carrier family 30 (zinc)          | chr8q24.11           | transport                                    | ---                                 | -1.25         | -1.62           | 1.22      | 1.13        | 1.41      | 1.32        | 1.11       | -1.06        | 1.49       | 1.15         | 3.21       | 1.97         |
| SLC30A9    | solute carrier family 30 (zinc)          | chr4p13              | nucleotide-excision repair                   | ---                                 | 1.12          | 1.24            | 1.04      | -1.23       | 1.04      | -1.02       | 1.20       | 1.08         | -1.23      | -1.45        | -2.41      | -2.18        |
| SLC30A9    | solute carrier family 30 (zinc)          | chr4p13              | nucleotide-excision repair                   | ---                                 | 1.03          | 1.01            | -1.10     | 1.04        | -1.04     | 1.04        | -1.09      | -1.13        | -1.06      | 1.08         | -1.48      | -1.44        |
| SLC31A1    | solute carrier family 31 (cofactor)      | chr9q32              | transport                                    | ---                                 | -1.07         | -1.08           | -1.08     | -1.08       | -1.04     | -1.19       | 1.08       | -1.02        | 1.75       | 1.58         | 1.83       | 2.03         |
| SLC31A1    | solute carrier family 31 (cofactor)      | chr9q32              | transport                                    | ---                                 | 1.10          | -1.05           | -1.01     | 1.04        | 1.05      | 1.09        | 1.04       | -1.00        | 1.45       | 1.59         | 1.58       | 1.73         |
| SLC31A1    | solute carrier family 31 (cofactor)      | chr9q32              | transport                                    | ---                                 | 1.09          | -1.03           | 1.12      | -1.03       | 1.01      | -1.17       | -1.94      | -1.63        | 1.09       | 1.25         | 1.29       | 1.29         |
| SLC31A2    | solute carrier family 31 (cofactor)      | chr9q32              | transport                                    | ---                                 | -1.15         | -1.14           | -1.14     | -1.14       | 1.05      | 1.05        | -1.23      | 1.01         | -1.13      | -1.05        | 1.09       | 1.10         |
| SLC33A1    | solute carrier family 33 (acetate)       | chr3q25.31           | transport                                    | ---                                 | 1.16          | 1.14            | 1.17      | -1.12       | -1.03     | -1.09       | -1.00      | -1.01        | 1.96       | 1.95         | 3.40       | 3.98         |
| SLC34A1    | solute carrier family 34 (sodium)        | chr5q35              | transport                                    | ---                                 | -2.67         | 1.57            | 1.67      | -1.86       | 2.01      | 3.56        | -1.31      | -1.52        | -1.27      | 1.03         | 2.22       | -1.30        |
| SLC34A2    | solute carrier family 34 (sodium)        | chr4p15.2            | in utero embryonic development               | ---                                 | -4.85         | -1.47           | -3.48     | -1.31       | -1.91     | -1.05       | 2.13       | 1.34         | 1.64       | 1.56         | -1.77      | -1.55        |
| SLC35A1    | solute carrier family 35 (cysteine)      | chr6q15              | carbohydrate metabolic process               | ---                                 | 1.06          | -1.02           | 1.07      | -1.00       | -1.05     | 1.08        | -1.21      | -1.13        | -1.61      | -1.38        | -1.23      | -1.26        |
| SLC35A2    | solute carrier family 35 (UDP-glucose)   | chrXp11.23-p11.22    | galactose metabolic process                  | ---                                 | -1.09         | -1.12           | 1.15      | 1.15        | 1.12      | -1.02       | -1.11      | -1.03        | 1.18       | 1.07         | 1.77       | 2.14         |
| SLC35A2    | solute carrier family 35 (UDP-glucose)   | chrXp11.23-p11.22    | galactose metabolic process                  | ---                                 | -1.08         | 1.00            | 1.01      | -1.06       | -1.05     | 1.09        | -1.27      | -1.21        | 1.36       | 1.00         | 2.36       | 2.20         |
| SLC35A3    | solute carrier family 35 (UDP-glucose)   | chr1p21              | UDP-N-acetylglucosamine metabolic process    | ---                                 | -1.13         | -1.20           | 1.11      | 1.02        | 1.15      | 1.14        | 1.04       | 1.07         | 1.18       | 1.37         | 1.13       | 1.42         |
| SLC35B1    | solute carrier family 35, member 1       | chr17q21.33          | transport                                    | ---                                 | -1.13         | -1.10           | -1.09     | -1.13       | 1.08      | -1.02       | -1.03      | 1.06         | 1.07       | 1.03         | -1.17      | -1.13        |
| SLC35B3    | solute carrier family 35, member 3       | chr6p24.3            | carbohydrate metabolic process               | ---                                 | 1.03          | -1.31           | 1.16      | -1.10       | 1.00      | 1.53        | -1.27      | 1.05         | -1.60      | -1.59        | -2.52      | -1.60        |
| SLC35B4    | solute carrier family 35, member 4       | chr7q33              | regulation of gluconeogenesis                | ---                                 | 1.05          | -1.16           | 1.26      | -1.05       | 1.11      | 1.01        | -1.43      | -1.19        | -1.22      | -1.25        | -1.53      | -1.82        |
| SLC35B4    | solute carrier family 35, member 4       | chr7q33              | regulation of gluconeogenesis                | ---                                 | -1.07         | -1.12           | 1.09      | 1.02        | 1.02      | 1.06        | -1.38      | -1.14        | -2.07      | -1.82        | -1.86      | -1.77        |
| SLC35C1    | solute carrier family 35, member 1       | chr11p11.2           | transport                                    | ---                                 | -1.03         | 1.02            | -1.00     | 1.10        | 1.12      | 1.18        | -1.05      | -1.10        | 1.71       | 1.32         | 1.62       | 1.84         |
| SLC35C1    | solute carrier family 35, member 1       | chr11p11.2           | transport                                    | ---                                 | -1.04         | -1.02           | -1.13     | -1.01       | 1.21      | 1.02        | 1.08       | 1.20         | 2.08       | 1.64         | 1.27       | 1.47         |
| SLC35D1    | solute carrier family 35 (UDP-glucose)   | chr1p32-p31          | UDP-glucuronate biosynthetic process         | ---                                 | 1.34          | 1.59            | 1.01      | 1.15        | -1.09     | -1.09       | -2.20      | -1.34        | -2.01      | -2.24        | -3.09      | -4.38        |
| SLC35D1    | solute carrier family 35 (UDP-glucose)   | chr1p32-p31          | UDP-glucuronate biosynthetic process         | ---                                 | 1.05          | -1.05           | 1.22      | 1.02        | 1.10      | 1.00        | -1.55      | -1.24        | -1.91      | -1.42        | -2.05      | -2.19        |
| SLC35D2    | solute carrier family 35, member 2       | chr9q22.32           | carbohydrate metabolic process               | ---                                 | -1.56         | -1.54           | 1.15      | 1.14        | 1.35      | 1.06        | 1.25       | 1.14         | -1.89      | -2.00        | -2.41      | -1.31        |
| SLC35D2    | solute carrier family 35, member 2       | chr9q22.32           | carbohydrate metabolic process               | ---                                 | -1.06         | 1.01            | -1.03     | -1.09       | 1.21      | -1.07       | 1.06       | 1.02         | 1.09       | 1.01         | 1.35       | 1.42         |
| SLC35D2    | solute carrier family 35, member 2       | chr9q22.32           | carbohydrate metabolic process               | ---                                 | 1.08          | 1.03            | 1.02      | -1.02       | -1.00     | -1.07       | 1.04       | 1.10         | 1.01       | -1.03        | 1.11       | 1.11         |
| SLC35D3    | solute carrier family 35, member 3       | chr6q23.3            | transport                                    | ---                                 | 1.73          | 2.72            | -1.10     | 2.84        | 3.15      | 1.36        | -1.68      | 1.44         | 1.49       | 1.34         | 1.47       | 1.36         |
| SLC35E1    | solute carrier family 35, member 1       | chr19p13.11          | transport                                    | ---                                 | -1.06         | -1.03           | -1.02     | -1.07       | 1.05      | -1.06       | 1.15       | 1.06         | 1.27       | 1.35         | 1.37       | 1.62         |
| SLC35E1    | solute carrier family 35, member 1       | chr19p13.11          | transport                                    | ---                                 | -1.06         | -1.11           | -1.07     | -1.10       | -1.01     | 1.05        | 1.01       | -1.05        | 1.28       | 1.33         | 1.29       | 1.44         |
| SLC35E1    | solute carrier family 35, member 1       | chr19p13.11          | transport                                    | ---                                 | -1.06         | -1.14           | -1.07     | -1.05       | 1.05      | 1.01        | 1.12       | -1.05        | 1.31       | 1.47         | 1.27       | 1.50         |
| SLC35E1    | solute carrier family 35, member 1       | chr19p13.11          | transport                                    | ---                                 | 1.15          | -1.07           | 1.05      | -1.25       | -1.04     | 1.15        | -1.01      | 1.02         | 1.61       | 1.50         | 1.27       | 1.51         |
| SLC35E1    | solute carrier family 35, member 1       | chr19p13.11          | transport                                    | ---                                 | 1.19          | 1.16            | -1.12     | 1.19        | 2.10      | 2.19        | -1.18      | -1.24        | -1.17      | -1.28        | -1.32      | -1.61        |

| ID       | Gene Title                    | Chromosomal Location | 1st Gene Ontology Biological Process | Pathway | A2497 30 mins | A2497P' 30 mins | A2497 2 h | A2497P' 2 h | A2497 4 h | A2497P' 4 h | A2497 24 h | A2497P' 24 h | A2497 48 h | A2497P' 48 h | A2497 72 h | A2497P' 72 h |
|----------|-------------------------------|----------------------|--------------------------------------|---------|---------------|-----------------|-----------|-------------|-----------|-------------|------------|--------------|------------|--------------|------------|--------------|
| SLC35E1  | solute carrier family 35, me  | chr19p13.11          | transport                            | ---     | -1.07         | 1.01            | 1.06      | -1.17       | -1.01     | -1.06       | 1.09       | -1.02        | 1.25       | 1.27         | 1.44       | 1.46         |
| SLC35E2  | solute carrier family 35, me  | chr1p36.33           | 0                                    | ---     | 1.12          | 1.79            | 1.71      | 1.70        | 1.70      | 1.92        | -1.61      | 1.27         | -3.15      | -3.95        | -1.96      | -3.83        |
| SLC35E2  | solute carrier family 35, me  | chr1p36.33           | transmembrane transport              | ---     | -1.17         | -1.05           | 1.04      | 1.02        | -1.01     | -1.08       | -1.02      | 1.04         | -2.43      | -1.69        | -1.94      | -1.60        |
| SLC35E3  | solute carrier family 35, me  | chr12q15             | 0                                    | ---     | 1.19          | 1.14            | -1.14     | -1.14       | -1.09     | 1.07        | 1.01       | 1.10         | -2.01      | -1.89        | -1.73      | -1.66        |
| SLC35E4  | solute carrier family 35, me  | chr22q12.2           | transmembrane transport              | ---     | 1.01          | -1.02           | 1.02      | -1.06       | 1.01      | -1.08       | -1.32      | 1.02         | 1.51       | 1.50         | 1.15       | 1.35         |
| SLC35F2  | solute carrier family 35, me  | chr11q22.3           | transport                            | ---     | 1.05          | 1.11            | -1.04     | -1.06       | 1.04      | 1.04        | 1.04       | -1.03        | 1.25       | 1.26         | 1.26       | 1.16         |
| SLC35F3  | solute carrier family 35, me  | chr1q42.2            | transport                            | ---     | 1.08          | 1.03            | 1.11      | 1.02        | -1.05     | 1.05        | -1.43      | -1.05        | -1.75      | -2.39        | -1.62      | -1.59        |
| SLC35F5  | solute carrier family 35, me  | chr2q14.1            | transport                            | ---     | -1.03         | -1.14           | -1.02     | 1.08        | -1.10     | 1.10        | 1.69       | 1.10         | 1.09       | 1.38         | -1.60      | -2.40        |
| SLC35F5  | solute carrier family 35, me  | chr2q14.1            | transport                            | ---     | 1.15          | 1.10            | -1.02     | 1.05        | -1.10     | 1.10        | -1.14      | -1.08        | -1.57      | -1.28        | 1.04       | -1.10        |
| SLC35F5  | solute carrier family 35, me  | chr2q14.1            | transport                            | ---     | 1.63          | 1.73            | -2.08     | -1.33       | 1.28      | -1.14       | 1.03       | -1.94        | 1.23       | 1.91         | 1.79       | 1.02         |
| SLC35F6  | solute carrier family 35, me  | chr2p23.3            | transport                            | ---     | 1.18          | 1.16            | 1.11      | 1.20        | 1.03      | -1.01       | 1.09       | 1.05         | 1.17       | -1.10        | 1.18       | 1.15         |
| SLC35G1  | solute carrier family 35, me  | chr10q23.33          | 0                                    | ---     | 1.11          | -1.03           | -1.04     | 1.03        | -1.14     | 1.00        | -1.08      | -1.04        | -1.29      | -1.03        | -1.68      | -1.56        |
| SLC36A1  | solute carrier family 36 (pr  | chr5q33.1            | transport                            | ---     | 1.06          | 1.06            | 1.04      | -1.11       | 1.01      | 1.07        | -1.15      | -1.20        | -1.44      | -1.59        | -1.59      | -1.51        |
| SLC37A1  | solute carrier family 37 (gl  | chr21q22.3           | transport                            | ---     | -1.13         | -1.31           | -1.01     | 1.08        | 1.14      | 1.00        | -1.09      | 1.25         | -1.12      | 1.03         | 1.30       | 1.29         |
| SLC37A4  | solute carrier family 37 (gl  | chr11q23.3           | carbohydrate metabolic process       | ---     | -1.28         | -1.18           | 1.09      | 1.09        | -1.43     | -1.34       | -1.06      | -1.05        | 1.35       | 1.23         | 1.38       | 1.49         |
| SLC37A4  | solute carrier family 37 (gl  | chr11q23.3           | carbohydrate metabolic process       | ---     | -1.11         | -1.21           | -1.04     | 1.09        | 1.01      | -1.03       | -1.02      | 1.19         | 1.47       | 1.28         | 1.14       | 1.31         |
| SLC38A1  | solute carrier family 38, me  | chr12q13.11          | neurotransmitter uptake              | ---     | 1.06          | 1.11            | -1.03     | -1.01       | 1.01      | 1.03        | -1.05      | -1.11        | -1.05      | -1.01        | -1.11      | -1.14        |
| SLC38A10 | solute carrier family 38, me  | chr17q25.3           | transport                            | ---     | -1.06         | -1.18           | -1.05     | 1.09        | 1.00      | 1.04        | 1.10       | 1.16         | -1.27      | -1.11        | -2.70      | -1.79        |
| SLC38A6  | solute carrier family 38, me  | chr14q23.1           | transport                            | ---     | 1.01          | -1.02           | -1.09     | -1.00       | -1.04     | 1.21        | -1.56      | -1.20        | -2.06      | -1.84        | -1.37      | -1.58        |
| SLC38A7  | solute carrier family 38, me  | chr16q21             | transport                            | ---     | -1.02         | 1.01            | 1.14      | 1.04        | 1.05      | -1.14       | -1.01      | -1.01        | -1.18      | -1.38        | -1.14      | -1.80        |
| SLC38A7  | solute carrier family 38, me  | chr16q21             | transport                            | ---     | 1.10          | 1.03            | -1.14     | -1.26       | 1.14      | -1.08       | -1.16      | -1.33        | -1.32      | -1.69        | -1.27      | -1.32        |
| SLC38A7  | solute carrier family 38, me  | chr16q21             | transport                            | ---     | 1.06          | -1.00           | 1.15      | 1.15        | 1.01      | 1.01        | 1.07       | 1.09         | -1.43      | -1.48        | -1.35      | -1.30        |
| SLC38A9  | solute carrier family 38, me  | chr5q11.2            | transport                            | ---     | -1.04         | -1.05           | -1.01     | -1.06       | -1.01     | 1.03        | -1.35      | -1.05        | -2.19      | -1.88        | -1.63      | -1.64        |
| SLC38A9  | solute carrier family 38, me  | chr5q11.2            | transport                            | ---     | -1.29         | -1.82           | 1.17      | 1.11        | 1.24      | 1.59        | -1.21      | -1.35        | -2.60      | -1.52        | -2.38      | -2.42        |
| SLC39A1  | solute carrier family 39 (zin | chr1q21              | transport                            | ---     | 1.07          | -1.05           | -1.18     | -1.22       | -1.12     | -1.03       | -1.04      | 1.07         | 1.12       | 1.30         | 1.02       | 1.08         |
| SLC39A11 | solute carrier family 39 (me  | chr17q21.31          | transport                            | ---     | 1.07          | 1.12            | -1.00     | -1.07       | 1.04      | 1.00        | 1.08       | 1.00         | 1.05       | 1.04         | 1.53       | 1.40         |
| SLC39A13 | solute carrier family 39 (zin | chr11p11.2           | transport                            | ---     | 1.03          | -1.03           | 1.12      | 1.16        | 1.11      | 1.09        | 1.24       | 1.06         | 1.21       | 1.08         | 1.09       | 1.15         |
| SLC39A13 | solute carrier family 39 (zin | chr11p11.2           | transport                            | ---     | 1.14          | 1.00            | 1.05      | 1.21        | -1.05     | -1.11       | 1.28       | 1.08         | 1.36       | 1.08         | 2.01       | 2.27         |
| SLC39A6  | solute carrier family 39 (zin | chr18q12.2           | transport                            | ---     | 1.17          | 1.21            | 1.56      | 1.75        | 1.07      | -1.09       | 1.27       | 1.28         | -1.03      | -1.12        | 1.44       | 1.27         |
| SLC39A7  | solute carrier family 39 (zin | chr6p21.3            | transport                            | ---     | 1.03          | 1.11            | 1.09      | -1.03       | -1.09     | -1.17       | 1.13       | 1.11         | 1.70       | 1.79         | 2.02       | 1.94         |
| SLC39A8  | solute carrier family 39 (zin | chr4q22-q24          | transport                            | ---     | 1.00          | 1.09            | 1.01      | -1.11       | -1.02     | -1.03       | 1.08       | 1.02         | 1.40       | 1.37         | 1.85       | 1.54         |
| SLC39A8  | solute carrier family 39 (zin | chr4q22-q24          | transport                            | ---     | -1.05         | -1.07           | 1.12      | 1.10        | -1.14     | -1.12       | 1.02       | -1.09        | 1.73       | 1.47         | 2.83       | 2.34         |
| SLC39A8  | solute carrier family 39 (zin | chr4q22-q24          | transport                            | ---     | 1.07          | 1.07            | 1.06      | -1.17       | -1.11     | 1.05        | 1.04       | -1.00        | 1.44       | 1.24         | 1.90       | 1.49         |
| SLC39A8  | solute carrier family 39 (zin | chr4q22-q24          | zinc ion transport                   | ---     | 1.01          | -1.11           | 1.45      | 1.07        | -1.51     | -1.06       | -1.02      | -1.16        | 1.94       | 1.64         | 2.90       | 2.53         |
| SLC39A9  | solute carrier family 39 (zin | chr14q24.1           | transport                            | ---     | -1.21         | 1.07            | 1.60      | 1.19        | 1.39      | 1.49        | -1.67      | -1.29        | -1.08      | -1.20        | -1.60      | 1.10         |
| SLC3A1   | solute carrier family 3 (cys  | chr2p16.3            | amino acid transmembrane transport   | ---     | 1.10          | 1.04            | 1.25      | 1.15        | -1.13     | 1.00        | -1.19      | -1.03        | -1.18      | 1.04         | 1.19       | 1.15         |
| SLC3A2   | solute carrier family 3 (acti | chr11q13             | carbohydrate metabolic process       | ---     | 1.04          | -1.07           | -1.02     | 1.05        | -1.02     | -1.01       | 1.01       | 1.01         | 1.50       | 1.56         | 1.06       | 1.24         |
| SLC40A1  | solute carrier family 40 (iro | chr2q32              | lymphocyte homeostasis               | ---     | 1.13          | 1.13            | 1.13      | 1.20        | 1.24      | 1.10        | -1.42      | -1.17        | -4.53      | -3.53        | -2.84      | -2.78        |
| SLC41A1  | solute carrier family 41, me  | chr1q32.1            | transport                            | ---     | -1.18         | -1.05           | 1.16      | 1.05        | 1.16      | 1.06        | 1.03       | 1.08         | 1.48       | 1.47         | 1.59       | 1.58         |
| SLC41A2  | solute carrier family 41, me  | chr12q23.3           | transport                            | ---     | -1.01         | -1.05           | 1.08      | 1.03        | 1.01      | 1.01        | -1.36      | -1.19        | -2.29      | -1.85        | -1.85      | -1.57        |
| SLC41A2  | solute carrier family 41, me  | chr12q23.3           | transport                            | ---     | -1.03         | -1.05           | 1.29      | -1.15       | 1.03      | -1.38       | -1.21      | -1.20        | -3.40      | -1.67        | -1.31      | 1.24         |
| SLC41A2  | solute carrier family 41, me  | chr12q23.3           | transport                            | ---     | 1.03          | 1.00            | -1.01     | -1.05       | -1.00     | 1.05        | -1.11      | 1.02         | -2.59      | -1.76        | -1.75      | -1.72        |
| SLC41A3  | solute carrier family 41, me  | chr3q21.2            | cation transport                     | ---     | 1.05          | -1.06           | 1.01      | -1.03       | 1.35      | 1.26        | 1.15       | 1.24         | -1.30      | -1.12        | -1.57      | -1.31        |
| SLC41A3  | solute carrier family 41, me  | chr3q21.2            | cation transport                     | ---     | 1.04          | 1.10            | -1.08     | -1.04       | 1.11      | 1.10        | 1.05       | -1.09        | -1.29      | -1.45        | -1.47      | -1.42        |
| SLC43A1  | solute carrier family 43, me  | chr11q12.1           | transport                            | ---     | 1.09          | 1.31            | 1.15      | 1.18        | -1.30     | 1.07        | 1.06       | -1.03        | -2.19      | -1.27        | -1.74      | -1.66        |
| SLC43A3  | solute carrier family 43, me  | chr11q11             | transmembrane transport              | ---     | -1.04         | -1.04           | -1.04     | 1.02        | -1.01     | -1.02       | -1.03      | -1.03        | 1.57       | 1.37         | 1.26       | 1.40         |
| SLC43A3  | solute carrier family 43, me  | chr11q11             | transmembrane transport              | ---     | 1.11          | -1.04           | 1.02      | 1.00        | 1.15      | 1.05        | -1.04      | -1.23        | 1.45       | 1.43         | 1.53       | 1.74         |
| SLC44A1  | solute carrier family 44, me  | chr9q31.2            | phospholipid metabolic process       | ---     | -1.15         | -1.01           | -1.02     | 1.03        | -1.12     | 1.04        | -1.29      | -1.07        | -1.11      | -1.02        | -1.16      | -1.34        |
| SLC44A1  | solute carrier family 44, me  | chr9q31.2            | phospholipid metabolic process       | ---     | -1.05         | 1.00            | -1.02     | -1.06       | -1.02     | -1.02       | 1.02       | -1.02        | -1.11      | -1.02        | -1.24      | -1.24        |
| SLC44A2  | solute carrier family 44, me  | chr19p13.1           | phospholipid metabolic process       | ---     | 1.01          | 1.01            | 1.13      | -1.04       | 1.09      | -1.16       | 1.05       | -1.07        | 1.42       | 1.55         | 1.35       | 1.22         |
| SLC44A3  | solute carrier family 44, me  | chr1p21.3            | phospholipid metabolic process       | ---     | -1.08         | -1.27           | -1.05     | -1.40       | -1.02     | -1.14       | -1.31      | 1.03         | -1.43      | -1.23        | -2.01      | -2.08        |
| SLC44A5  | solute carrier family 44, me  | chr1p31.1            | phospholipid metabolic process       | ---     | 1.84          | 1.80            | -1.22     | 1.32        | 2.01      | 1.12        | 1.07       | 1.12         | -4.07      | -1.75        | -9.20      | -6.99        |
| SLC46A1  | solute carrier family 46 (fol | chr17q11.2           | vitamin metabolic process            | ---     | -1.16         | -1.10           | 1.21      | 1.40        | -1.06     | -1.23       | -1.42      | -1.27        | -3.50      | -3.24        | -2.99      | -2.33        |
| SLC46A1  | solute carrier family 46 (fol | chr17q11.2           | vitamin metabolic process            | ---     | 1.06          | -1.34           | -1.07     | 1.17        | -1.28     | -1.25       | -1.20      | -1.08        | 1.09       | -1.06        | 1.42       | 1.15         |
| SLC46A1  | solute carrier family 46 (fol | chr17q11.2           | vitamin metabolic process            | ---     | -1.15         | -1.05           | 1.02      | 1.05        | 1.00      | 1.12        | -1.08      | 1.08         | -1.00      | 1.03         | 1.58       | 1.33         |
| SLC47A2  | solute carrier family 47, me  | chr17p11.2           | transport                            | ---     | -1.85         | -1.60           | -1.03     | 1.37        | -1.13     | -1.53       | -1.27      | -1.01        | -2.76      | -2.25        | -8.80      | -7.22        |
| SLC48A1  | solute carrier family 48 (he  | chr12q13.11          | transport                            | ---     | 1.22          | 1.09            | 1.09      | 1.18        | 1.00      | 1.15        | 1.10       | -1.03        | 1.04       | 1.04         | -1.19      | -1.18        |
| SLC4A1   | solute carrier family 4, anio | chr17q21.31          | transport                            | ---     | 1.19          | 1.15            | 1.04      | -1.44       | 1.06      | 1.22        | 1.48       | 1.02         | 1.76       | 1.34         | -1.44      | 1.52         |
| SLC4A1   | solute carrier family 4, anio | chr17q21.31          | transport                            | ---     | -1.48         | 6.09            | -4.60     | -4.56       | -4.36     | -3.61       | -2.45      | -2.28        | 2.78       | 7.05         | -1.79      | 1.29         |
| SLC4A11  | solute carrier family 4, sodi | chr20p12             | transport                            | ---     | -1.14         | -1.03           | -1.06     | 1.13        | 1.16      | -1.09       | 1.11       | 1.12         | -1.25      | -1.31        | -1.52      | -1.85        |
| SLC4A2   | solute carrier family 4, anio | chr7q36.1            | transport                            | ---     | 1.01          | -1.05           | 1.02      | 1.05        | -1.01     | -1.00       | 1.07       | 1.01         | -1.83      | -2.10        | -2.16      | -2.25        |
| SLC4A4   | solute carrier family 4, sodi | chr4q21              | transport                            | ---     | -1.14         | 1.16            | -1.96     | -1.19       | 4.66      | 3.35        | -1.15      | -1.28        | -1.00      | 1.72         | -2.24      | -1.07        |
| SLC4A4   | solute carrier family 4, sodi | chr4q21              | transport                            | ---     | 1.93          | 1.12            | -1.90     | -2.00       | -1.61     | -1.28       | -22.54     | -1.80        | 2.25       | -2.08        | -1.37      | 1.22         |
| SLC4A7   | solute carrier family 4, sodi | chr3p22              | transport                            | ---     | 1.08          | -1.08           | 1.07      | 1.23        | 1.38      | 1.55        | 1.56       | 1.32         | 1.59       | 1.75         | 1.46       | 1.13         |
| SLC4A7   | solute carrier family 4, sodi | chr3p22              | transport                            | ---     | -1.26         | -1.33           | 1.17      | 1.07        | -1.03     | -1.08       | 1.02       | 1.27         | 1.28       | 1.33         | 1.61       | 1.69         |
| SLC4A8   | solute carrier family 4, sodi | chr12q13.13          | transport                            | ---     | -1.68         | -1.26           | 1.04      | 1.02        | -3.65     | -2.49       | -1.14      | 1.58         | 1.22       | 5.28         | -1.03      | 4.11         |

| ID          | Gene Title                     | Chromosomal Location | 1st Gene Ontology Biological Process      | Pathway                        | A2497 30 mins | A2497P' 30 mins | A2497 2 h | A2497P' 2 h | A2497 4 h | A2497P' 4 h | A2497 24 h | A2497P' 24 h | A2497 48 h | A2497P' 48 h | A2497 72 h | A2497P' 72 h |
|-------------|--------------------------------|----------------------|-------------------------------------------|--------------------------------|---------------|-----------------|-----------|-------------|-----------|-------------|------------|--------------|------------|--------------|------------|--------------|
| SLC50A1     | solute carrier family 50 (sug) | chr1q22              | DNA recombination                         | ---                            | -1.12         | -1.03           | -1.04     | -1.00       | -1.06     | -1.02       | 1.10       | -1.04        | 1.38       | 1.51         | 1.97       | 2.09         |
| SLC52A2     | solute carrier family 52, rib  | chr8q24.3            | transport                                 | ---                            | 1.04          | -1.02           | 1.16      | 1.23        | 1.09      | -1.04       | -1.09      | 1.06         | 1.24       | -1.04        | 1.60       | 1.60         |
| SLC52A2     | solute carrier family 52, rib  | chr8q24.3            | transport                                 | ---                            | -1.12         | -1.21           | -1.02     | 1.05        | -1.06     | -1.07       | -1.15      | -1.01        | 1.26       | 1.14         | 1.40       | 1.59         |
| SLC5A1      | solute carrier family 5 (sod)  | chr22q12.2           | carbohydrate metabolic process            | ---                            | 2.08          | 2.41            | -1.13     | -1.02       | -1.57     | -1.91       | -3.10      | -1.04        | -2.55      | -1.45        | -1.27      | 1.86         |
| SLC5A1      | solute carrier family 5 (sod)  | chr22q12.3           | carbohydrate metabolic process            | ---                            | -1.08         | -1.45           | -1.68     | 1.03        | 1.35      | 1.43        | -1.97      | -1.02        | 1.53       | 1.17         | -1.42      | -1.38        |
| SLC5A10     | solute carrier family 5 (sod)  | chr17p11.2           | transport                                 | ---                            | 1.22          | 1.27            | 1.28      | 4.82        | 1.28      | 1.98        | 1.16       | -1.32        | -3.33      | -1.88        | -4.27      | -2.64        |
| SLC5A12     | solute carrier family 5 (sod)  | chr11p14.2           | transport                                 | ---                            | 2.02          | 2.91            | -11.92    | -8.66       | -2.46     | -2.48       | -1.99      | 1.28         | -1.57      | -1.59        | -2.02      | 2.92         |
| SLC5A2      | solute carrier family 5 (sod)  | chr16p11.2           | carbohydrate metabolic process            | ---                            | -1.13         | -1.04           | -1.11     | 1.02        | 1.06      | -1.09       | 1.23       | 1.19         | 1.22       | 1.19         | 1.48       | 1.87         |
| SLC5A3      | solute carrier family 5 (sod)  | chr21q22.12          | inositol metabolic process                | ---                            | -1.28         | -1.27           | -1.02     | -1.04       | 1.15      | 1.00        | -1.02      | -1.09        | -1.16      | 1.01         | 1.02       | 1.29         |
| SLC5A3      | solute carrier family 5 (sod)  | chr21q22.12          | inositol metabolic process                | ---                            | -1.08         | -1.07           | -1.07     | -1.09       | 1.05      | 1.07        | -1.21      | -1.22        | -1.55      | -1.34        | -1.21      | -1.03        |
| SLC5A3      | solute carrier family 5 (sod)  | chr21q22.12          | inositol metabolic process                | ---                            | 1.48          | 1.17            | 1.16      | 1.09        | 1.11      | 1.25        | -1.17      | -1.04        | -2.36      | -1.75        | -1.76      | -1.69        |
| SLC5A3      | solute carrier family 5 (sod)  | chr21q22.12          | inositol metabolic process                | ---                            | 1.07          | 1.04            | 1.07      | -1.14       | -1.05     | 1.02        | -1.27      | -1.22        | -1.85      | -1.51        | -1.18      | -1.28        |
| SLC6A1      | solute carrier family 6 (neu)  | chr3p25.3            | transport                                 | ---                            | 4.49          | 5.75            | 1.02      | -1.23       | -11.55    | -5.71       | -1.11      | -1.31        | 1.15       | 1.21         | 1.38       | -1.60        |
| SLC6A10P // | solute carrier family 6 (neu)  | chr16p11.2 /// chrX  | creatine metabolic process                | ---                            | -1.27         | -1.36           | 1.05      | -1.10       | -1.30     | -1.08       | 1.14       | -1.11        | 1.42       | 2.07         | 1.37       | 1.60         |
| SLC6A14     | solute carrier family 6 (am)   | chrXq23              | amino acid transmembrane transport        | ---                            | 1.20          | -1.08           | 1.04      | -1.24       | -1.17     | 1.07        | -1.08      | -1.09        | -1.88      | -1.52        | -1.70      | -1.48        |
| SLC6A15     | solute carrier family 6 (neu)  | chr12q21.3           | transport                                 | ---                            | 1.62          | 1.46            | 1.16      | 1.19        | -1.51     | -1.11       | 1.94       | 1.57         | 3.71       | 4.12         | 1.91       | 1.53         |
| SLC6A15     | solute carrier family 6 (neu)  | chr12q21.3           | transport                                 | ---                            | -1.17         | 1.10            | -1.04     | 1.32        | -1.23     | -1.32       | -1.57      | -1.33        | 1.95       | 2.46         | 1.32       | 1.20         |
| SLC6A15     | solute carrier family 6 (neu)  | chr12q21.3           | transport                                 | ---                            | 1.01          | -1.16           | 1.16      | -1.05       | -1.03     | -1.18       | 1.13       | -1.01        | -1.73      | -1.52        | -1.16      | -1.19        |
| SLC6A16     | solute carrier family 6, men   | chr19q13.33          | transport                                 | ---                            | -8.74         | -1.36           | 1.50      | 1.58        | 1.01      | 1.24        | -1.48      | 1.88         | 1.21       | 1.58         | 1.77       | 2.04         |
| SLC6A17     | solute carrier family 6, men   | chr1p13.3            | transport                                 | ---                            | -1.35         | 1.07            | 1.76      | 1.43        | 1.03      | -1.14       | -1.23      | 1.01         | 2.21       | 1.90         | -1.06      | 1.53         |
| SLC6A2      | solute carrier family 6 (neu)  | chr16q12.2           | transport                                 | ---                            | -2.73         | 1.23            | -1.45     | -2.65       | -1.02     | -1.03       | 1.76       | 1.33         | -1.68      | 1.40         | -1.15      | -2.62        |
| SLC6A2      | solute carrier family 6 (neu)  | chr16q12.2           | transport                                 | ---                            | 2.12          | 2.14            | -1.28     | 2.18        | -1.09     | -1.12       | 1.03       | 1.44         | 2.79       | 2.85         | 1.21       | 2.88         |
| SLC6A20     | solute carrier family 6 (pro)  | chr3p21.3            | amino acid transmembrane transport        | ---                            | -1.16         | 1.49            | 1.19      | 3.65        | -4.35     | -2.79       | 2.60       | 1.79         | 5.79       | 3.91         | 1.02       | -2.13        |
| SLC6A4      | solute carrier family 6 (neu)  | chr17q11.2           | response to hypoxia                       | ---                            | 2.11          | 2.55            | -1.53     | -1.91       | -1.45     | -1.26       | -11.51     | -2.88        | 1.31       | -1.28        | 1.46       | 4.29         |
| SLC6A6      | solute carrier family 6 (neu)  | chr3p25.1            | cellular amino acid metabolic process     | ---                            | 1.10          | 1.13            | -1.13     | -1.03       | -1.05     | -1.00       | -1.14      | -1.07        | -1.10      | -1.13        | 1.02       | -1.16        |
| SLC6A6      | solute carrier family 6 (neu)  | chr3p25.1            | cellular amino acid metabolic process     | ---                            | -1.06         | -1.09           | -1.08     | -1.05       | 1.05      | 1.02        | 1.68       | 1.09         | 10.62      | 10.26        | 5.46       | 4.73         |
| SLC6A8      | solute carrier family 6 (neu)  | chrXq28              | creatine metabolic process                | ---                            | -1.18         | -1.18           | -1.02     | -1.05       | 1.11      | -1.05       | 1.34       | 1.05         | 1.83       | 2.27         | 1.27       | 1.73         |
| SLC6A8      | solute carrier family 6 (neu)  | chrXq28              | creatine metabolic process                | ---                            | -1.09         | -1.10           | 1.05      | 1.14        | 1.07      | -1.07       | 1.31       | 1.22         | 1.74       | 1.94         | -1.09      | 1.34         |
| SLC6A8      | solute carrier family 6 (neu)  | chrXq28              | creatine metabolic process                | ---                            | -1.13         | -1.14           | 1.12      | 1.03        | 1.17      | -1.00       | 1.35       | 1.02         | 1.80       | 2.01         | 1.41       | 1.83         |
| SLC7A1      | solute carrier family 7 (cati) | chr13q12.3           | amino acid transmembrane transport        | ---                            | -1.43         | -1.22           | 1.04      | 1.12        | 1.61      | 1.26        | 1.72       | 1.97         | 1.11       | 1.17         | 2.21       | 1.81         |
| SLC7A1      | solute carrier family 7 (cati) | chr13q12.3           | amino acid transmembrane transport        | ---                            | -1.05         | -1.09           | 1.04      | -1.04       | 1.30      | 1.35        | 1.40       | 1.18         | 2.00       | 1.83         | 1.91       | 1.84         |
| SLC7A11     | solute carrier family 7 (am)   | chr4q28-q32          | amino acid transmembrane transport        | ---                            | -1.11         | -1.12           | 1.12      | 1.10        | 1.18      | 1.10        | 1.03       | -1.07        | 1.28       | -1.23        | 1.87       | 1.23         |
| SLC7A11     | solute carrier family 7 (am)   | chr4q28-q32          | amino acid transmembrane transport        | ---                            | 1.19          | 1.17            | -1.03     | -1.18       | -1.04     | 1.03        | -1.28      | -1.17        | -1.26      | -1.40        | 1.05       | -1.22        |
| SLC7A2      | solute carrier family 7 (cati) | chr8p22              | nitric oxide production involved in infla | ---                            | 1.04          | 1.01            | 1.17      | -1.17       | 1.01      | -1.19       | 1.09       | 1.22         | 2.82       | 2.25         | 2.50       | 2.05         |
| SLC7A3      | solute carrier family 7 (cati) | chrXq13.1            | amino acid transmembrane transport        | ---                            | -3.60         | 1.21            | 3.43      | 6.12        | -2.33     | -1.53       | 3.00       | 12.33        | 7.99       | 3.31         | 3.92       | 4.09         |
| SLC7A5      | solute carrier family 7 (am)   | chr16q24.3           | amino acid transmembrane transport        | ---                            | -1.03         | 1.01            | -1.08     | -1.02       | -1.03     | 1.01        | 1.07       | 1.04         | 1.29       | 1.24         | -1.09      | -1.07        |
| SLC7A6      | solute carrier family 7 (am)   | chr16q22.1           | amino acid transmembrane transport        | ---                            | 1.05          | 1.02            | -1.07     | 1.10        | -1.06     | -1.04       | -1.03      | 1.08         | -1.57      | -1.87        | -1.32      | -1.34        |
| SLC7A6      | solute carrier family 7 (am)   | chr16q22.1           | amino acid transmembrane transport        | ---                            | 1.02          | 1.09            | 1.03      | -1.01       | -1.05     | -1.05       | -1.26      | -1.01        | -1.71      | -1.85        | -1.34      | -1.69        |
| SLC7A6OS    | solute carrier family 7, men   | chr16q22.1           | transport                                 | ---                            | -1.00         | -1.12           | -1.06     | 1.13        | -1.03     | 1.01        | 1.07       | 1.12         | 1.01       | -1.09        | 1.23       | 1.43         |
| SLC7A6OS    | solute carrier family 7, men   | chr16q22.1           | transport                                 | ---                            | -1.07         | -1.01           | -1.10     | -1.07       | -1.03     | -1.00       | -1.12      | -1.02        | -1.33      | -1.25        | -1.12      | -1.21        |
| SLC9A1      | solute carrier family 9, sub   | chr1p36.1-p35        | response to acid                          | G_Protein_Signaling // GenMAPP | 1.03          | -1.06           | -1.06     | -1.04       | 1.02      | -1.08       | 1.04       | -1.10        | -1.04      | 1.04         | 1.24       | 1.41         |
| SLC9A1      | solute carrier family 9, sub   | chr1p36.1-p35        | response to acid                          | G_Protein_Signaling // GenMAPP | 1.03          | -1.10           | 1.21      | -1.01       | 1.16      | 1.17        | -1.14      | -1.07        | 1.04       | -1.13        | 1.15       | 1.18         |
| SLC9A2      | solute carrier family 9, sub   | chr2q11.2            | transport                                 | ---                            | -1.42         | -1.27           | 1.09      | 1.08        | 1.20      | -1.03       | 1.25       | 1.07         | 1.25       | 1.21         | 2.89       | 2.82         |
| SLC9A3R1    | solute carrier family 9, sub   | chr17q25.1           | renal sodium ion transport                | ---                            | -1.07         | -1.02           | 1.01      | -1.00       | -1.07     | -1.04       | 1.03       | 1.00         | 1.20       | 1.26         | 1.39       | 1.52         |
| SLC9A3R2    | solute carrier family 9, sub   | chr16p13.3           | protein complex assembly                  | ---                            | -1.08         | -1.05           | -1.09     | 1.01        | -1.15     | -1.15       | 1.20       | 1.07         | 1.11       | -1.02        | 1.18       | 1.20         |
| SLC9A5      | solute carrier family 9, sub   | chr16q22.1           | transport                                 | ---                            | 3.36          | 2.92            | -1.26     | -1.75       | 1.27      | 1.55        | 1.19       | 1.47         | -2.80      | -1.46        | -1.70      | -3.56        |
| SLC9A5      | solute carrier family 9, sub   | chr16q22.1           | transport                                 | ---                            | -1.36         | -1.64           | 1.25      | 1.79        | -1.45     | -1.29       | -1.13      | -1.04        | 2.11       | 2.09         | 1.43       | 1.54         |
| SLC9A7      | solute carrier family 9, sub   | chrXp11.3/Xp11.3     | transport                                 | ---                            | -1.10         | 1.13            | 1.16      | 1.18        | 1.60      | 1.25        | 1.20       | -1.01        | 1.39       | 1.19         | 1.08       | 1.13         |
| SLC9A7      | solute carrier family 9, sub   | chrXp11.3/Xp11.3     | transport                                 | ---                            | 1.13          | -1.05           | -1.11     | 1.05        | 1.26      | 1.30        | 1.03       | -1.00        | 1.09       | 1.51         | 1.00       | -1.07        |
| SLC9A9      | solute carrier family 9, sub   | chr3q24              | transport                                 | ---                            | -1.00         | -1.11           | 1.54      | -1.36       | -1.20     | -1.03       | -1.00      | -1.22        | -1.42      | -2.03        | -1.32      | -2.03        |
| SLCO1B1     | solute carrier organic anion   | chr12p               | transport                                 | ---                            | 1.38          | 1.51            | -1.41     | -1.21       | 1.35      | 1.50        | -1.13      | 1.06         | -2.06      | -1.24        | 1.67       | 1.28         |
| SLCO1B3     | solute carrier organic anion   | chr12p12             | transport                                 | ---                            | -1.01         | 1.11            | 1.05      | -1.11       | 1.21      | 1.11        | -1.01      | -1.03        | -1.05      | 1.02         | 1.17       | 1.20         |
| SLCO2A1     | solute carrier organic anion   | chr3q21              | transport                                 | ---                            | 1.24          | 1.29            | 1.02      | 1.10        | -1.13     | -1.10       | -1.11      | -1.23        | -1.52      | -1.45        | -1.97      | -2.25        |
| SLCO3A1     | solute carrier organic anion   | chr15q26             | transport                                 | ---                            | -1.02         | -1.16           | 1.25      | 1.14        | 1.03      | 1.32        | 1.40       | -1.06        | -1.70      | -1.56        | -2.64      | -2.16        |
| SLCO3A1     | solute carrier organic anion   | chr15q26             | transport                                 | ---                            | 1.06          | 1.01            | 1.10      | 1.09        | 1.08      | -1.03       | -1.10      | 1.08         | -1.47      | -1.36        | -1.98      | -2.04        |
| SLCO3A1     | solute carrier organic anion   | chr15q26             | transport                                 | ---                            | 1.07          | 1.08            | 1.08      | 1.00        | -1.09     | -1.14       | 1.17       | 1.13         | -1.04      | -1.03        | -1.50      | -1.43        |
| SLCO3A1     | solute carrier organic anion   | chr15q26             | transport                                 | ---                            | -1.01         | 1.14            | 1.04      | 1.02        | -1.07     | 1.13        | -1.32      | -1.16        | -1.41      | -1.16        | -1.83      | -1.46        |
| SLCO4A1     | solute carrier organic anion   | chr20q13.33          | transport                                 | ---                            | -1.08         | -1.11           | 1.08      | -1.09       | 1.14      | 1.08        | 1.29       | 1.34         | 3.25       | 2.98         | 3.25       | 3.53         |
| SLCO4A1     | solute carrier organic anion   | chr20q13.33          | sodium-independent organic anion trans    | ---                            | 1.00          | 1.32            | 1.76      | 2.21        | 1.13      | 1.21        | -2.17      | -1.16        | 1.55       | 1.91         | 2.97       | 3.60         |
| SLFN11      | schlafen family member 11      | chr17q12             | defense response to virus                 | ---                            | 1.00          | 1.06            | -1.19     | -1.18       | -1.06     | -1.05       | 1.07       | 1.15         | 1.14       | 1.38         | 1.20       | 1.26         |
| SLFN12      | schlafen family member 12      | chr17q12             | 0                                         | ---                            | 1.02          | 1.03            | 1.03      | -1.01       | -1.07     | -1.10       | -1.19      | -1.37        | -2.08      | -1.83        | -1.20      | -1.61        |
| SLFN13      | schlafen family member 13      | chr17q12             | 0                                         | ---                            | -1.17         | -1.33           | 1.13      | 1.12        | 1.04      | 1.15        | 1.20       | 1.21         | -1.33      | -1.55        | -2.14      | -1.88        |
| SLFN5       | schlafen family member 5       | chr17q12             | cell differentiation                      | ---                            | -1.03         | -1.20           | 1.11      | 1.23        | 1.02      | -1.02       | 1.41       | -1.09        | 1.30       | 1.04         | 2.05       | 1.55         |
| SLFN5       | schlafen family member 5       | chr17q12             | cell differentiation                      | ---                            | -1.19         | -1.13           | 1.09      | 1.17        | -1.04     | -1.08       | 1.43       | 1.26         | 1.62       | 1.25         | 1.63       | 1.58         |
| SLFN5       | schlafen family member 5       | chr17q12             | cell differentiation                      | ---                            | 1.12          | 1.41            | 1.17      | 1.00        | 1.57      | 1.48        | 1.18       | 1.17         | 1.70       | 1.45         | 1.34       | 1.37         |
| SLFN5       | schlafen family member 5       | chr17q12             | cell differentiation                      | ---                            | 1.05          | -1.19           | 1.01      | 1.33        | 1.45      | 1.05        | 1.89       | 1.04         | 1.02       | -1.17        | -1.01      | 1.20         |

| ID      | Gene Title                                                | Chromosomal Location | 1st Gene Ontology Biological Process                                 | Pathway                               | A2497 30 mins | A2497P' 30 mins | A2497 2 h | A2497P' 2 h | A2497 4 h | A2497P' 4 h | A2497 24 h | A2497P' 24 h | A2497 48 h | A2497P' 48 h | A2497 72 h | A2497P' 72 h |
|---------|-----------------------------------------------------------|----------------------|----------------------------------------------------------------------|---------------------------------------|---------------|-----------------|-----------|-------------|-----------|-------------|------------|--------------|------------|--------------|------------|--------------|
| SLIRP   | SRA stem-loop interacting                                 | chr14q24.3           | negative regulation of mitochondrial RN                              | ---                                   | -1.04         | 1.00            | -1.09     | 1.03        | -1.03     | -1.14       | 1.22       | 1.25         | 1.63       | 1.23         | 1.26       | 1.17         |
| SLIT2   | slit homolog 2 (Drosophila)                               | chr4p15.2            | metanephros development                                              | ---                                   | 1.39          | 1.49            | 1.16      | -1.03       | 1.02      | 1.15        | -1.36      | -1.08        | 1.10       | 1.18         | 1.54       | 1.34         |
| SLIT2   | slit homolog 2 (Drosophila)                               | chr4p15.2            | metanephros development                                              | ---                                   | -1.17         | -1.34           | 1.13      | 1.09        | 1.06      | 1.06        | 1.28       | -1.18        | 1.33       | 1.24         | 1.64       | 1.64         |
| SLIT2   | slit homolog 2 (Drosophila)                               | chr4p15.2            | metanephros development                                              | ---                                   | -1.60         | -2.15           | 1.02      | 1.46        | 1.43      | 1.31        | -1.41      | -1.72        | -1.08      | -1.56        | 2.14       | 2.24         |
| SLITRK4 | SLIT and NTRK-like family                                 | chrXq27.3            | axonogenesis                                                         | ---                                   | 1.02          | -1.06           | -1.01     | 1.02        | 1.09      | 1.01        | -1.07      | 1.02         | -1.50      | -1.47        | -1.25      | -1.33        |
| SLITRK4 | SLIT and NTRK-like family                                 | chrXq27.3            | axonogenesis                                                         | ---                                   | 1.14          | 1.19            | -1.24     | 1.20        | -1.19     | -1.02       | -1.21      | -1.07        | -1.53      | -1.62        | -1.97      | -1.74        |
| SLITRK5 | SLIT and NTRK-like family                                 | chr13q31.2           | synaptic transmission                                                | ---                                   | -1.01         | -1.07           | 1.13      | 1.04        | 1.06      | -1.03       | -1.14      | -1.12        | -2.34      | -1.93        | -2.54      | -2.13        |
| SLITRK6 | SLIT and NTRK-like family                                 | chr13q31.1           | axonogenesis                                                         | ---                                   | -1.79         | -1.11           | -1.24     | -1.93       | 1.67      | 2.11        | 1.66       | -1.40        | 1.03       | -1.29        | 2.16       | 3.61         |
| SLK     | STE20-like kinase                                         | chr10q24.33          | protein phosphorylation                                              | ---                                   | 1.11          | 1.18            | 1.08      | 1.04        | -1.03     | 1.13        | -1.08      | 1.02         | -1.40      | -1.23        | -1.32      | -1.72        |
| SLK     | STE20-like kinase                                         | chr10q24.33          | protein phosphorylation                                              | ---                                   | 1.03          | -1.08           | -1.05     | -1.00       | 1.06      | 1.09        | -1.34      | -1.16        | -1.19      | -1.12        | -1.21      | -1.10        |
| SLMAP   | sarcolemma associated protein                             | chr3p21.2-p14.3      | protein folding                                                      | ---                                   | 1.13          | 1.14            | 1.07      | -1.06       | 1.48      | 1.16        | -1.00      | 1.07         | 1.14       | 1.34         | 1.57       | 1.52         |
| SLMO1   | slowmo homolog 1 (Drosophila)                             | chr18p11.21          | 0                                                                    | ---                                   | -1.09         | 1.00            | -1.00     | 1.10        | 1.47      | 1.59        | 1.33       | 1.27         | 1.03       | -1.12        | 1.46       | 2.00         |
| SLMO2   | slowmo homolog 2 (Drosophila)                             | chr20q13.32          | 0                                                                    | ---                                   | 1.09          | 1.11            | -1.08     | -1.05       | -1.04     | 1.04        | 1.01       | -1.07        | 1.15       | 1.15         | 1.26       | 1.12         |
| SLMO2   | slowmo homolog 2 (Drosophila)                             | chr20q13.32          | 0                                                                    | ---                                   | -1.04         | -1.01           | -1.03     | -1.05       | -1.04     | 1.02        | -1.04      | -1.06        | 1.08       | 1.27         | 1.35       | 1.24         |
| SLPI    | secretory leukocyte peptidase                             | chr20q12             | proteolysis                                                          | ---                                   | -1.08         | -1.06           | -1.03     | 1.08        | 1.03      | -1.09       | 1.22       | 1.02         | 1.53       | 1.27         | 1.30       | 1.40         |
| SLTM    | SAFB-like, transcription factor                           | chr15q22.1           | transcription, DNA-dependent                                         | ---                                   | -1.04         | 1.00            | -1.00     | 1.07        | 1.08      | 1.08        | -1.18      | -1.20        | -1.52      | -1.47        | -1.27      | -1.27        |
| SLU7    | SLU7 splicing factor homolog                              | chr5q33.3            | RNA splicing, via transesterification reaction                       | ---                                   | -1.05         | -1.02           | -1.01     | -1.03       | -1.05     | -1.01       | -1.02      | 1.03         | -1.38      | -1.13        | -1.18      | -1.20        |
| SLX4    | SLX4 structure-specific endonuclease                      | chr16p13.3           | double-strand break repair via homologous recombination              | ---                                   | -1.07         | -1.09           | -1.01     | 1.05        | -1.02     | -1.12       | -1.05      | 1.03         | 1.33       | 1.37         | 1.22       | 1.37         |
| SLX4IP  | SLX4 interacting protein                                  | chr20p12.2           | 0                                                                    | ---                                   | -1.15         | -1.16           | 1.09      | 1.05        | 1.08      | -1.02       | 1.11       | 1.15         | -1.40      | -1.31        | -1.38      | -1.33        |
| SM44    | glucuronidase, beta pseudogene                            | chr5q13.2            | skeletal system development                                          | ---                                   | -1.01         | -1.16           | -1.06     | -1.11       | 1.30      | 1.17        | -1.16      | -1.15        | -1.68      | -1.47        | -1.95      | -1.30        |
| SM44    | glucuronidase, beta pseudogene                            | chr5q13.2            | skeletal system development                                          | ---                                   | 1.41          | 1.31            | 1.15      | -1.09       | 1.25      | 1.22        | -1.33      | 1.04         | -1.65      | -1.70        | -1.89      | -1.42        |
| SMAD1   | SMAD family member 1                                      | chr4q31              | MAPK cascade                                                         | TGF_Beta_Signaling_Pathway // GenMAPP | 1.10          | 1.22            | -1.10     | 1.06        | 1.14      | 1.38        | -1.08      | -1.18        | -2.22      | -2.20        | -1.87      | -1.50        |
| SMAD2   | SMAD family member 2                                      | chr18q21.1           | negative regulation of transcription from RNA polymerase II promoter | TGF_Beta_Signaling_Pathway // GenMAPP | -1.03         | -1.09           | 1.02      | 1.07        | 1.07      | 1.03        | 1.19       | 1.02         | 1.56       | 1.42         | 1.54       | 1.47         |
| SMAD2   | SMAD family member 2                                      | chr18q21.1           | negative regulation of transcription from RNA polymerase II promoter | TGF_Beta_Signaling_Pathway // GenMAPP | -1.02         | -1.00           | -1.06     | 1.01        | 1.03      | 1.09        | -1.12      | -1.00        | -1.40      | -1.29        | -1.50      | -1.66        |
| SMAD5   | SMAD family member 5                                      | chr5q31              | ossification                                                         | TGF_Beta_Signaling_Pathway // GenMAPP | 1.26          | 1.14            | 1.21      | -1.15       | 1.43      | 1.08        | -1.19      | -1.02        | -1.01      | -1.08        | 2.16       | 1.51         |
| SMAD5   | SMAD family member 5                                      | chr5q31              | ossification                                                         | TGF_Beta_Signaling_Pathway // GenMAPP | -1.00         | 1.02            | -1.17     | -1.16       | -1.11     | -1.06       | -1.29      | -1.22        | -1.28      | -1.21        | -1.26      | -1.34        |
| SMAD6   | SMAD family member 6                                      | chr15q21-q22         | ureteric bud development                                             | TGF_Beta_Signaling_Pathway // GenMAPP | -1.08         | -1.13           | 1.04      | 1.13        | 1.01      | 1.01        | -1.04      | 1.23         | -1.71      | -1.76        | -1.38      | -1.67        |
| SMAD6   | SMAD family member 6                                      | chr15q21-q22         | ureteric bud development                                             | ---                                   | -1.01         | -1.05           | 1.03      | 1.07        | -1.26     | -1.01       | -1.12      | 1.23         | 1.11       | 1.09         | -1.06      | -1.41        |
| SMAD7   | SMAD family member 7                                      | chr18q21.1           | negative regulation of transcription from RNA polymerase II promoter | TGF_Beta_Signaling_Pathway // GenMAPP | 1.24          | 1.11            | 1.02      | -1.21       | -1.10     | -1.05       | -1.19      | -1.16        | -2.00      | -1.78        | -1.40      | -1.50        |
| SMAD9   | SMAD family member 9                                      | chr13q12-q14         | ureteric bud development                                             | TGF_Beta_Signaling_Pathway // GenMAPP | 1.09          | -1.01           | 1.04      | -1.04       | -1.09     | -1.08       | -1.01      | -1.07        | -1.24      | 1.04         | -2.10      | -1.96        |
| SMAD9   | SMAD family member 9                                      | chr13q12-q14         | ureteric bud development                                             | TGF_Beta_Signaling_Pathway // GenMAPP | 1.00          | -2.33           | -1.09     | -1.53       | 1.79      | 1.27        | -1.02      | 1.27         | -1.41      | -1.26        | -1.22      | -1.20        |
| SMAGP   | small cell adhesion glycoprotein                          | chr12q13.13          | 0                                                                    | ---                                   | -1.04         | -1.53           | -1.02     | 1.29        | 1.11      | -1.02       | 1.23       | 1.09         | 1.52       | 1.29         | 1.42       | 1.16         |
| SMAP2   | small ArfGAP2                                             | chr1p35.3-p34.1      | regulation of ARF GTPase activity                                    | ---                                   | -1.05         | -1.16           | -1.02     | -1.10       | 1.05      | 1.18        | -1.08      | -1.06        | 1.25       | 1.48         | -1.11      | 1.16         |
| SMARCA1 | SWI/SNF related, matrix associated, nuclear corepressor 1 | chrXq25              | DNA strand renaturation                                              | ---                                   | -1.01         | 1.11            | 1.06      | -1.14       | 1.13      | 1.28        | 1.08       | -1.00        | -1.99      | -1.70        | -1.59      | -1.90        |
| SMARCA1 | SWI/SNF related, matrix associated, nuclear corepressor 1 | chrXq25              | DNA strand renaturation                                              | ---                                   | 1.11          | 1.10            | -1.05     | -1.15       | -1.06     | -1.23       | -1.05      | 1.03         | -1.76      | -1.42        | -1.44      | -1.70        |
| SMARCA2 | SWI/SNF related, matrix associated, nuclear corepressor 2 | chr9p22.3            | negative regulation of transcription from RNA polymerase II promoter | ---                                   | 1.13          | 1.13            | 1.26      | 1.11        | 1.06      | 1.19        | -1.53      | -1.36        | -1.90      | -1.49        | -1.35      | -1.60        |
| SMARCA2 | SWI/SNF related, matrix associated, nuclear corepressor 2 | chr9p22.3            | negative regulation of transcription from RNA polymerase II promoter | ---                                   | -1.09         | -1.13           | -1.00     | 1.07        | 1.16      | 1.22        | 1.08       | -1.02        | -1.38      | -1.25        | -1.35      | -1.41        |
| SMARCA2 | SWI/SNF related, matrix associated, nuclear corepressor 2 | chr9p22.3            | negative regulation of transcription from RNA polymerase II promoter | ---                                   | -1.19         | -1.22           | 1.02      | -1.08       | 1.20      | 1.19        | 1.29       | -1.07        | -1.32      | -1.23        | -1.21      | -1.22        |
| SMARCA2 | SWI/SNF related, matrix associated, nuclear corepressor 2 | chr9p22.3            | negative regulation of transcription from RNA polymerase II promoter | ---                                   | 1.10          | 1.20            | 1.05      | 1.02        | -1.01     | -1.01       | -1.17      | -1.08        | -1.59      | -1.25        | -1.26      | -1.40        |
| SMARCA5 | SWI/SNF related, matrix associated, nuclear corepressor 5 | chr4q31.1-q31.2      | chromatin silencing at rDNA                                          | ---                                   | -1.03         | 1.09            | -1.04     | 1.10        | -1.03     | -1.02       | -1.17      | 1.02         | -1.44      | -1.41        | -1.32      | -1.35        |
| SMARCB1 | SWI/SNF related, matrix associated, nuclear corepressor 1 | chr22q11.23/22q11    | blastocyst development                                               | ---                                   | 1.06          | -1.10           | -1.10     | -1.02       | -1.00     | -1.06       | 1.33       | 1.24         | 1.02       | -1.06        | 1.01       | 1.31         |
| SMARCC1 | SWI/SNF related, matrix associated, nuclear corepressor 1 | chr3p21.31           | nucleosome disassembly                                               | ---                                   | 1.07          | -1.00           | 1.12      | 1.04        | 1.11      | 1.04        | -1.02      | -1.20        | -1.50      | -1.56        | -1.25      | -1.21        |
| SMARCC1 | SWI/SNF related, matrix associated, nuclear corepressor 1 | chr3p21.31           | nucleosome disassembly                                               | ---                                   | 1.08          | 1.02            | 1.07      | -1.08       | -1.08     | -1.06       | -1.03      | -1.09        | -1.53      | -1.44        | -1.32      | -1.48        |
| SMARCC1 | SWI/SNF related, matrix associated, nuclear corepressor 1 | chr3p21.31           | nucleosome disassembly                                               | ---                                   | 1.02          | 1.14            | -1.02     | -1.12       | -1.04     | 1.01        | -1.12      | -1.04        | -1.32      | -1.21        | -1.28      | -1.34        |
| SMARCC2 | SWI/SNF related, matrix associated, nuclear corepressor 2 | chr12q13.2           | nucleosome disassembly                                               | ---                                   | -1.02         | -1.00           | -1.07     | -1.04       | -1.01     | 1.02        | -1.06      | -1.02        | -1.35      | -1.24        | -1.68      | -1.61        |
| SMARCC2 | SWI/SNF related, matrix associated, nuclear corepressor 2 | chr12q13.2           | nucleosome disassembly                                               | ---                                   | 1.53          | 1.51            | 1.04      | -1.34       | -1.30     | -1.03       | -1.17      | 1.01         | -1.69      | -1.77        | -2.24      | -2.95        |
| SMARCD1 | SWI/SNF related, matrix associated, nuclear corepressor 1 | chr12q13-q14         | nucleosome disassembly                                               | ---                                   | 1.10          | 1.17            | 1.07      | -1.09       | 1.02      | -1.04       | -1.11      | -1.07        | -1.23      | -1.52        | -1.24      | -1.48        |
| SMARCD3 | SWI/SNF related, matrix associated, nuclear corepressor 3 | chr7q35-q36          | positive regulation of neuroblast proliferation                      | ---                                   | -1.22         | -1.22           | 1.04      | 1.21        | 1.30      | -1.05       | 1.26       | 1.28         | 1.01       | -1.02        | -1.36      | -1.10        |
| SMARCE1 | SWI/SNF related, matrix associated, nuclear corepressor 1 | chr17q21.2           | nucleosome disassembly                                               | ---                                   | -1.13         | -1.04           | -1.07     | -1.16       | 1.09      | 1.10        | -1.40      | -1.27        | -1.98      | -2.13        | -2.20      | -2.35        |
| SMARCE1 | SWI/SNF related, matrix associated, nuclear corepressor 1 | chr17q21.2           | nucleosome disassembly                                               | ---                                   | -1.23         | -1.21           | -1.03     | -1.04       | -1.05     | 1.00        | 1.14       | 1.22         | -1.03      | -1.02        | -1.39      | -1.31        |
| SMARCE1 | SWI/SNF related, matrix associated, nuclear corepressor 1 | chr17q21.2           | nucleosome disassembly                                               | ---                                   | -1.22         | -1.12           | 1.06      | 1.05        | 1.12      | -1.07       | 1.20       | 1.06         | 1.46       | 1.19         | 1.25       | 1.26         |
| SMARCE1 | SWI/SNF related, matrix associated, nuclear corepressor 1 | chr17q21.2           | nucleosome disassembly                                               | ---                                   | 1.07          | 1.02            | -1.10     | -1.16       | -1.01     | -1.01       | 1.12       | 1.02         | -4.20      | -3.31        | -9.50      | -7.37        |
| SMC1A   | structural maintenance of chromosomes 1                   | chrXp11.22-p11.21    | mitotic sister chromatid segregation                                 | Cell_cycle_KEGG // GenMAPP // mRNA    | -1.05         | -1.20           | 1.06      | 1.19        | -1.11     | -1.04       | 1.01       | -1.02        | 1.56       | 1.49         | 1.46       | 1.76         |
| SMC1A   | structural maintenance of chromosomes 1                   | chrXp11.22-p11.21    | mitotic sister chromatid segregation                                 | Cell_cycle_KEGG // GenMAPP // mRNA    | 1.15          | -1.04           | 1.16      | 1.28        | -1.10     | -1.22       | 1.24       | 1.20         | -1.00      | 1.50         | 1.74       | 1.74         |
| SMC1A   | structural maintenance of chromosomes 1                   | chrXp11.22-p11.21    | mitotic sister chromatid segregation                                 | Cell_cycle_KEGG // GenMAPP // mRNA    | 1.08          | 1.04            | -1.08     | 1.01        | -1.05     | 1.09        | -1.15      | -1.24        | -1.09      | -1.08        | -1.21      | -1.28        |
| SMC2    | structural maintenance of chromosomes 2                   | chr9q31.1            | mitotic cell cycle                                                   | ---                                   | 1.08          | 1.11            | -1.01     | 1.11        | -1.05     | 1.13        | -1.51      | -1.27        | -1.54      | -1.00        | -1.37      | -1.39        |
| SMC3    | structural maintenance of chromosomes 3                   | chr10q25             | M phase of mitotic cell cycle                                        | ---                                   | 1.12          | 1.18            | -1.04     | -1.14       | -1.33     | -1.13       | 1.00       | 1.09         | -1.37      | -1.35        | -1.10      | -1.22        |
| SMC4    | structural maintenance of chromosomes 4                   | chr3q26.1            | mitotic sister chromatid segregation                                 | ---                                   | 1.02          | -1.06           | 1.00      | 1.04        | 1.02      | 1.06        | -1.16      | -1.15        | -1.26      | -1.10        | -1.43      | -1.43        |
| SMC4    | structural maintenance of chromosomes 4                   | chr3q26.1            | mitotic sister chromatid segregation                                 | ---                                   | 1.01          | -1.27           | 1.34      | 1.06        | 1.15      | 1.31        | -1.29      | -1.19        | 1.21       | 1.77         | 2.43       | 2.39         |
| SMC4    | structural maintenance of chromosomes 4                   | chr3q26.1            | mitotic sister chromatid segregation                                 | ---                                   | 1.04          | 1.09            | 1.05      | 1.05        | -1.03     | -1.06       | -1.06      | -1.08        | 1.10       | 1.15         | 1.40       | 1.34         |
| SMC5    | structural maintenance of chromosomes 5                   | chr9q21.12           | telomere maintenance via recombination                               | ---                                   | -1.19         | -1.13           | 1.08      | 1.08        | 1.19      | 1.10        | 1.07       | 1.17         | 1.06       | -1.01        | 1.27       | 1.38         |
| SMC6    | structural maintenance of chromosomes 6                   | chr2p24.2            | telomere maintenance via recombination                               | ---                                   | -1.01         | 1.06            | -1.03     | -1.03       | -1.00     | -1.03       | -1.21      | 1.16         | -2.10      | -1.91        | -2.07      | -2.01        |
| SMCHD1  | structural maintenance of chromosomes 1                   | chr18p11.32          | dosage compensation by inactivation of X chromosome                  | ---                                   | 1.23          | 1.14            | -1.02     | -1.02       | 1.03      | 1.13        | -1.07      | -1.02        | -1.84      | -1.82        | -1.25      | -1.36        |
| SMCHD1  | structural maintenance of chromosomes 1                   | chr18p11.32          | dosage compensation by inactivation of X chromosome                  | ---                                   | -1.03         | -1.09           | 1.16      | 1.01        | -1.09     | 1.08        | 1.16       | 1.01         | -1.05      | -1.06        | 1.55       | 1.43         |
| SMCHD1  | structural maintenance of chromosomes 1                   | chr18p11.32          | dosage compensation by inactivation of X chromosome                  | ---                                   | 1.20          | 1.21            | 1.08      | -1.01       | 1.01      | 1.08        | -1.24      | -1.06        | -2.01      | -1.75        | -1.52      | -1.52        |
| SMCR7L  | Smith-Magenis syndrome critical region like 7             | chr22q13             | mitochondrial fission                                                | ---                                   | -1.17         | -1.09           | -1.14     | -1.36       | -1.04     | -1.08       | -1.21      | -1.11        | 1.01       | 1.03         | 1.29       | 1.18         |

| ID             | Gene Title                                             | Chromosomal Location | 1st Gene Ontology Biological Process                                 | Pathway                              | A2497 30 mins | A2497P' 30 mins | A2497 2 h | A2497P' 2 h | A2497 4 h | A2497P' 4 h | A2497 24 h | A2497P' 24 h | A2497 48 h | A2497P' 48 h | A2497 72 h | A2497P' 72 h |
|----------------|--------------------------------------------------------|----------------------|----------------------------------------------------------------------|--------------------------------------|---------------|-----------------|-----------|-------------|-----------|-------------|------------|--------------|------------|--------------|------------|--------------|
| SMCR7L         | Smith-Magenis syndrome                                 | chr22q13             | mitochondrial fission                                                | ---                                  | -1.01         | -1.07           | 1.14      | 1.24        | 1.00      | -1.02       | -1.07      | -1.00        | 1.37       | 1.09         | 1.43       | 1.56         |
| SMDT1          | single-pass membrane protein                           | chr22q13.2           | 0                                                                    | ---                                  | -1.03         | -1.07           | -1.05     | -1.05       | -1.14     | -1.11       | -1.04      | 1.13         | -1.04      | -1.06        | -1.49      | -1.37        |
| SMDT1          | single-pass membrane protein                           | chr22q13.2           | 0                                                                    | ---                                  | -1.09         | -1.09           | -1.06     | 1.03        | -1.02     | -1.10       | 1.17       | 1.32         | 1.09       | -1.02        | -1.33      | -1.21        |
| SMEK1          | SMEK homolog 1, suppressor of tumorigenesis            | chr14q32.12          | protein dephosphorylation                                            | ---                                  | -1.04         | 1.05            | 1.07      | 1.03        | 1.02      | -1.03       | 1.12       | 1.14         | 1.03       | -1.02        | 1.40       | 1.20         |
| SMEK1          | SMEK homolog 1, suppressor of tumorigenesis            | chr14q32.12          | protein dephosphorylation                                            | ---                                  | 1.16          | 1.22            | -1.02     | -1.31       | 1.05      | 1.08        | -1.14      | -1.19        | 1.06       | 1.11         | 1.75       | 1.56         |
| SMEK2          | SMEK homolog 2, suppressor of tumorigenesis            | chr2p16.1            | protein dephosphorylation                                            | ---                                  | 1.54          | 1.49            | 1.13      | 1.21        | -1.10     | 1.05        | 1.51       | 1.57         | 2.49       | 2.13         | 4.33       | 1.86         |
| SMEK2          | SMEK homolog 2, suppressor of tumorigenesis            | chr2p16.1            | protein dephosphorylation                                            | ---                                  | -1.10         | 1.16            | -1.05     | -1.05       | 1.01      | -1.07       | -1.15      | 1.02         | -1.28      | -1.30        | -1.78      | -1.94        |
| SMEK2          | SMEK homolog 2, suppressor of tumorigenesis            | chr2p16.1            | protein dephosphorylation                                            | ---                                  | -1.04         | -1.01           | 1.06      | -1.02       | 1.02      | -1.05       | -1.14      | -1.06        | -1.09      | -1.09        | -1.06      | -1.01        |
| SMG5           | smg-5 homolog, nonsense                                | chr1q21.2            | nuclear-transcribed mRNA catabolic process                           | ---                                  | 1.02          | -1.05           | 1.02      | 1.13        | 1.04      | -1.10       | 1.13       | 1.12         | 1.59       | 1.18         | 1.45       | 1.66         |
| SMG5           | smg-5 homolog, nonsense                                | chr1q21.2            | nuclear-transcribed mRNA catabolic process                           | ---                                  | 1.29          | 1.00            | -1.10     | 1.16        | -1.01     | -1.07       | -1.25      | 1.06         | 1.30       | 1.08         | 1.48       | 1.68         |
| SMG6           | smg-6 homolog, nonsense                                | chr17p13.3           | nuclear-transcribed mRNA catabolic process                           | ---                                  | 1.03          | -1.04           | 1.29      | 1.08        | -1.27     | -1.01       | -1.26      | -1.20        | -1.17      | -1.32        | -1.02      | 1.33         |
| SMG6           | smg-6 homolog, nonsense                                | chr17p13.3           | nuclear-transcribed mRNA catabolic process                           | ---                                  | -1.08         | -1.21           | -1.02     | 1.47        | -1.01     | -1.45       | 5.73       | 5.47         | 9.84       | 7.55         | -1.43      | -1.01        |
| SMG9           | smg-9 homolog, nonsense                                | chr19q13.31          | nuclear-transcribed mRNA catabolic process                           | ---                                  | -1.75         | -1.56           | -1.67     | -1.75       | -1.30     | -1.36       | -1.08      | -1.13        | -3.11      | 1.21         | 1.62       | 2.75         |
| SMG9           | smg-9 homolog, nonsense                                | chr19q13.31          | nuclear-transcribed mRNA catabolic process                           | ---                                  | -1.19         | -1.26           | 1.04      | 1.13        | 1.04      | -1.07       | -1.00      | 1.11         | 1.15       | 1.14         | 1.34       | 1.60         |
| SMG9           | smg-9 homolog, nonsense                                | chr19q13.31          | nuclear-transcribed mRNA catabolic process                           | ---                                  | -1.31         | -1.25           | 1.07      | 1.01        | 1.08      | -1.08       | 1.03       | 1.03         | 1.21       | 1.08         | 1.59       | 1.67         |
| SMIM1          | small integral membrane protein                        | chr1p36.32           | 0                                                                    | ---                                  | 1.05          | 1.06            | 2.01      | 1.50        | -1.19     | -1.57       | 1.87       | -1.29        | 2.75       | 4.44         | 2.59       | 2.19         |
| SMIM11         | small integral membrane protein                        | chr21q22.12          | 0                                                                    | ---                                  | -1.07         | -1.08           | -1.17     | -1.24       | 1.31      | 1.04        | -1.18      | 1.00         | -1.35      | -1.26        | 1.02       | 1.07         |
| SMIM11         | small integral membrane protein                        | chr21q22.12          | 0                                                                    | ---                                  | -1.35         | -1.28           | 1.08      | -1.19       | -1.40     | -1.38       | 1.08       | -1.03        | -1.03      | 1.03         | -1.16      | -1.50        |
| SMIM12         | small integral membrane protein                        | chr1p34.3            | 0                                                                    | ---                                  | -1.07         | -1.33           | 1.16      | 1.04        | -1.16     | 1.02        | -1.63      | -1.25        | -2.80      | -2.06        | -4.41      | -3.67        |
| SMIM13         | small integral membrane protein                        | chr6p24.2            | 0                                                                    | ---                                  | 1.40          | 1.40            | 1.01      | -1.08       | 1.05      | -1.22       | -1.16      | -1.50        | 1.56       | 1.38         | 1.06       | -1.16        |
| SMIM13         | small integral membrane protein                        | chr6p24.2            | 0                                                                    | ---                                  | 1.01          | 1.02            | -1.04     | -1.06       | 1.03      | 1.08        | 1.01       | -1.03        | 1.20       | 1.13         | 1.53       | 1.30         |
| SMIM14         | small integral membrane protein                        | chr4p14              | 0                                                                    | ---                                  | 1.08          | 1.04            | -1.04     | -1.14       | -1.25     | -1.07       | -1.05      | -1.15        | -1.10      | 1.11         | 1.44       | 1.30         |
| SMIM19         | small integral membrane protein                        | chr8p11.21           | 0                                                                    | ---                                  | -1.07         | -1.04           | 1.11      | 1.06        | 1.09      | -1.07       | 1.01       | 1.03         | -1.32      | -1.36        | -1.36      | -1.16        |
| SMIM2          | small integral membrane protein                        | chr13q14.11          | 0                                                                    | ---                                  | 1.03          | -1.15           | 1.02      | 1.23        | -1.06     | 1.04        | -1.27      | -1.04        | -2.03      | -1.85        | -2.06      | -1.22        |
| SMIM20         | small integral membrane protein                        | chr4p15.2            | 0                                                                    | ---                                  | -1.08         | -1.13           | 1.03      | 1.06        | 1.09      | 1.06        | 1.14       | -1.09        | 1.12       | 1.16         | 1.32       | 1.33         |
| SMIM21         | small integral membrane protein                        | chr18q23             | 0                                                                    | ---                                  | 2.16          | 1.41            | -1.16     | -1.31       | 2.24      | 2.26        | 10.03      | 5.84         | 6.86       | 15.54        | -1.12      | -1.03        |
| SMIM2-AS1      | SMIM2 antisense RNA 1                                  | ---                  | 0                                                                    | ---                                  | -1.10         | -1.23           | 1.16      | 1.22        | 1.13      | 1.01        | 1.07       | 1.19         | -1.57      | -1.50        | -1.88      | -1.37        |
| SMIM4          | small integral membrane protein                        | chr3p21.1            | 0                                                                    | ---                                  | 1.61          | 1.14            | -1.08     | -1.05       | 1.30      | 1.11        | -1.49      | 1.01         | -1.60      | -1.69        | -2.23      | -1.68        |
| SMIM5          | small integral membrane protein                        | chr17q25.1           | 0                                                                    | ---                                  | -1.14         | -1.53           | 1.78      | 1.37        | 1.22      | -1.12       | -2.48      | -1.12        | -1.56      | -1.98        | 1.66       | -1.11        |
| SMIM7          | small integral membrane protein                        | chr19p13.11          | 0                                                                    | ---                                  | 1.03          | 1.10            | -1.04     | -1.09       | -1.03     | -1.10       | 1.05       | 1.08         | -1.26      | -1.29        | -1.45      | -1.64        |
| SMIM7          | small integral membrane protein                        | chr19p13.11          | 0                                                                    | ---                                  | 1.15          | 1.03            | -1.05     | 1.05        | -1.08     | -1.04       | 1.02       | 1.06         | -1.10      | -1.08        | -1.16      | -1.19        |
| SMIM7          | small integral membrane protein                        | chr19p13.11          | 0                                                                    | ---                                  | -1.15         | -1.20           | -1.17     | -1.01       | 1.13      | 1.12        | 1.25       | 1.08         | -1.86      | -2.21        | -1.46      | 1.16         |
| SMIM7          | small integral membrane protein                        | chr19p13.11          | 0                                                                    | ---                                  | 1.00          | 1.09            | 1.02      | -1.03       | 1.03      | -1.06       | 1.05       | 1.04         | 1.24       | 1.16         | 1.56       | 1.45         |
| SMIM7          | small integral membrane protein                        | chr19p13.11          | 0                                                                    | ---                                  | 1.00          | 1.07            | 1.06      | 1.04        | 1.04      | -1.14       | 1.34       | 1.20         | 2.43       | 1.96         | 2.29       | 2.35         |
| SMIM8          | small integral membrane protein                        | chr6q15-q16.1        | 0                                                                    | ---                                  | 1.25          | 1.13            | -1.06     | -1.15       | 1.02      | -1.06       | -1.04      | 1.02         | 1.21       | 1.33         | 1.42       | 1.28         |
| SMIM8          | small integral membrane protein                        | chr6q15-q16.1        | 0                                                                    | ---                                  | 1.36          | 1.02            | 1.04      | 1.02        | -1.05     | 1.03        | -1.75      | -1.44        | -1.69      | -1.47        | -2.00      | -1.97        |
| SMN1 // SMN2   | survival of motor neuron 1, telomeric                  | chr5q13.2            | spliceosomal complex assembly                                        | ---                                  | 1.17          | 1.21            | 1.03      | -1.05       | -1.13     | -1.01       | -1.01      | -1.03        | 1.09       | 1.13         | 1.23       | 1.15         |
| SMNDC1         | survival of motor neuron domain containing 1           | chr10q23             | RNA splicing, via transesterification reaction                       | ---                                  | -1.02         | 1.03            | -1.06     | -1.05       | -1.05     | 1.09        | 1.01       | 1.03         | 1.10       | 1.09         | 1.18       | 1.09         |
| SMOX           | spermine oxidase                                       | chr20p13             | polyamine metabolic process                                          | ---                                  | -1.10         | -1.27           | -1.08     | -1.26       | 1.63      | 1.29        | 1.47       | 1.13         | 2.05       | 2.29         | 1.60       | 1.40         |
| SMOX           | spermine oxidase                                       | chr20p13             | polyamine metabolic process                                          | ---                                  | -1.09         | -1.20           | 1.05      | 1.25        | 1.04      | 1.05        | 1.41       | 1.31         | 3.27       | 2.45         | 1.66       | 1.56         |
| SMPD1          | sphingomyelin phosphodiesterase 1                      | chr11p15.4-p15.1     | phospholipid metabolic process                                       | Ovarian_Infertility_Genes // GenMAPP | -1.06         | -1.11           | -1.08     | 1.28        | 1.13      | -1.03       | 1.12       | 1.28         | -1.22      | -1.07        | -1.03      | 1.27         |
| SMPD1          | sphingomyelin phosphodiesterase 1                      | chr11p15.4-p15.1     | phospholipid metabolic process                                       | Ovarian_Infertility_Genes // GenMAPP | -1.12         | -1.19           | 1.03      | 1.22        | 1.05      | -1.11       | 1.52       | 1.21         | 1.10       | 1.12         | 1.15       | 1.53         |
| SMPD3          | sphingomyelin phosphodiesterase 3                      | chr16q22.1           | lipid metabolic process                                              | ---                                  | -1.07         | 1.28            | -2.61     | 1.22        | -1.45     | -4.73       | -2.45      | -1.97        | -1.21      | 4.28         | -1.45      | 1.84         |
| SMPDL3A        | sphingomyelin phosphodiesterase 3-like A               | chr6q22.31           | sphingomyelin catabolic process                                      | ---                                  | 1.41          | 1.22            | -1.05     | 1.05        | -1.05     | -1.02       | -1.19      | -1.08        | -2.96      | -2.75        | -1.99      | -3.26        |
| SMPDL3B        | sphingomyelin phosphodiesterase 3-like B               | chr1p35.3            | sphingomyelin catabolic process                                      | ---                                  | -1.11         | -1.26           | -1.22     | 1.01        | 1.25      | -1.42       | 1.24       | 1.15         | -1.12      | -1.01        | -2.07      | -1.03        |
| SMR3A // SMR3B | submaxillary gland androgen-inducible                  | chr4q13.3            | 0                                                                    | ---                                  | -1.93         | -1.34           | 1.26      | 2.34        | 15.48     | 4.67        | -1.25      | 1.46         | -4.82      | -3.06        | -8.46      | -6.05        |
| SMR3B          | submaxillary gland androgen-inducible                  | chr4q13.3            | 0                                                                    | ---                                  | 1.13          | -1.47           | -3.63     | -1.56       | -3.37     | -1.98       | -2.00      | 1.02         | -2.46      | -2.33        | -14.91     | -10.91       |
| SMS            | spermine synthase                                      | chrXp22.1            | methionine metabolic process                                         | ---                                  | 1.00          | 1.01            | -1.07     | 1.05        | -1.07     | -1.10       | 1.01       | -1.02        | 1.39       | 1.27         | 1.27       | 1.25         |
| SMTN           | smoothelin                                             | chr22q12.2           | smooth muscle contraction                                            | ---                                  | -1.15         | -1.21           | 1.08      | 1.01        | -1.16     | -1.21       | 1.05       | 1.20         | 2.84       | 2.32         | 2.51       | 2.40         |
| SMTN           | smoothelin                                             | chr22q12.2           | smooth muscle contraction                                            | ---                                  | 1.05          | 1.14            | 1.18      | 1.26        | 1.02      | -1.14       | -1.27      | 1.07         | 2.90       | 1.79         | 2.66       | 2.91         |
| SMU1           | smu-1 suppressor of mec-8                              | chr9p12              | 0                                                                    | ---                                  | -1.05         | -1.04           | 1.04      | 1.10        | 1.06      | 1.05        | 1.08       | -1.00        | 1.01       | -1.07        | 1.06       | 1.07         |
| SMU1           | smu-1 suppressor of mec-8                              | chr9p12              | 0                                                                    | ---                                  | -1.02         | -1.06           | 1.00      | -1.13       | -1.01     | 1.06        | 1.01       | 1.14         | 1.25       | 1.24         | 1.44       | 1.26         |
| SMUG1          | single-strand-selective mononucleotide phosphorylase 1 | chr12q13.11-q13.3    | DNA repair                                                           | ---                                  | 1.04          | -1.04           | 1.12      | -1.05       | -1.03     | -1.03       | -1.13      | -1.17        | -1.35      | -1.23        | -1.16      | -1.28        |
| SMUG1          | single-strand-selective mononucleotide phosphorylase 1 | chr12q13.11-q13.3    | DNA repair                                                           | ---                                  | -1.11         | -1.08           | 1.10      | -1.10       | 1.11      | -1.13       | -1.07      | -1.09        | -1.64      | -1.43        | -1.25      | -1.31        |
| SMURF1         | SMAD specific E3 ubiquitin ligase                      | chr7q22.1            | protein polyubiquitination                                           | ---                                  | 1.25          | 1.18            | -1.01     | 1.19        | -1.02     | -1.10       | 1.63       | 1.50         | 3.73       | 2.13         | 1.83       | 1.52         |
| SMURF1         | SMAD specific E3 ubiquitin ligase                      | chr7q22.1            | protein polyubiquitination                                           | ---                                  | 1.04          | 1.11            | -1.02     | -1.12       | 1.06      | 1.02        | 1.16       | -1.07        | -1.10      | -1.06        | 1.50       | 1.19         |
| SMURF1         | SMAD specific E3 ubiquitin ligase                      | chr7q22.1            | protein polyubiquitination                                           | ---                                  | -1.06         | -1.15           | -1.04     | -1.16       | -1.13     | -1.17       | 1.31       | 1.68         | 3.39       | 2.42         | 2.10       | 1.85         |
| SMURF2         | SMAD specific E3 ubiquitin ligase                      | chr17q22-q23         | negative regulation of transcription from RNA polymerase II promoter | ---                                  | 1.04          | 1.14            | 1.08      | -1.15       | -1.21     | -1.17       | -1.47      | -1.13        | -1.48      | -1.65        | -1.48      | -1.69        |
| SMYD1          | SET and MYND domain containing 1                       | chr2p11.2            | chromatin remodeling                                                 | ---                                  | 2.27          | 1.15            | -2.98     | -3.43       | 4.23      | 1.16        | 2.64       | 1.23         | 3.63       | 2.15         | 2.68       | 1.68         |
| SMYD5          | SMYD family member 5                                   | chr2p13.2            | methylation                                                          | ---                                  | -1.17         | -1.12           | 1.04      | 1.11        | -1.02     | -1.16       | 1.20       | 1.27         | 1.04       | -1.03        | 1.18       | 1.33         |
| SNAIL          | snail family zinc finger 1                             | chr20q13.2           | negative regulation of transcription from RNA polymerase II promoter | ---                                  | 1.61          | 1.47            | -1.13     | -1.27       | -1.31     | -1.38       | 1.11       | -1.44        | 2.12       | 1.21         | 3.72       | 2.61         |
| SNAI3-AS1      | SNAI3 antisense RNA 1                                  | chr16q24.3           | 0                                                                    | ---                                  | -2.21         | -1.48           | -1.19     | 2.58        | -1.60     | -3.46       | 1.23       | 1.04         | -1.54      | 1.49         | 4.03       | 4.82         |
| SNAI3-AS1      | SNAI3 antisense RNA 1                                  | chr16q24.3           | 0                                                                    | ---                                  | -2.75         | -1.69           | -1.04     | 1.94        | 1.58      | -1.02       | 1.22       | 1.94         | -1.16      | -1.06        | -1.18      | 2.18         |
| SNAP23         | synaptosomal-associated protein 23                     | chr15q14             | transport                                                            | ---                                  | 1.07          | -1.00           | 1.05      | 1.08        | 1.00      | 1.06        | -1.05      | -1.12        | -1.06      | 1.02         | 1.15       | -1.05        |
| SNAP23         | synaptosomal-associated protein 23                     | chr15q14             | transport                                                            | ---                                  | -1.06         | -1.23           | 1.44      | 1.60        | -1.18     | 1.13        | -1.01      | 1.19         | 1.47       | 1.08         | 1.83       | 1.53         |
| SNAP23         | synaptosomal-associated protein 23                     | chr15q14             | transport                                                            | ---                                  | 1.05          | -1.01           | 1.11      | -1.24       | 1.28      | 1.21        | 1.49       | 1.03         | -1.16      | -1.17        | 1.48       | 1.49         |

| ID                   | Gene Title                                        | Chromosomal Location      | 1st Gene Ontology Biological Process                                 | Pathway                                     | A2497 30 mins | A2497P' 30 mins | A2497 2 h | A2497P' 2 h | A2497 4 h | A2497P' 4 h | A2497 24 h | A2497P' 24 h | A2497 48 h | A2497P' 48 h | A2497 72 h | A2497P' 72 h |
|----------------------|---------------------------------------------------|---------------------------|----------------------------------------------------------------------|---------------------------------------------|---------------|-----------------|-----------|-------------|-----------|-------------|------------|--------------|------------|--------------|------------|--------------|
| SNAP25               | synaptosomal-associated protein 25                | chr20p12-p11.2            | neurotransmitter uptake                                              | ---                                         | 1.58          | 1.37            | -1.03     | 1.00        | 1.10      | -1.06       | -1.01      | -1.18        | -3.31      | -4.32        | -4.99      | -4.70        |
| SNAP25               | synaptosomal-associated protein 25                | chr20p12-p11.2            | neurotransmitter uptake                                              | ---                                         | 1.13          | 1.49            | 1.37      | 1.09        | -1.02     | -1.06       | 1.27       | 1.09         | -1.57      | -2.45        | -2.85      | -6.07        |
| SNAP29               | synaptosomal-associated protein 29                | chr22q11.21               | autophagic vacuole fusion                                            | ---                                         | 1.05          | 1.03            | -1.02     | 1.17        | -1.06     | -1.10       | -1.03      | -1.06        | -1.37      | -1.36        | -1.63      | -1.41        |
| SNAPC1               | small nuclear RNA activating protein 1            | chr14q22                  | transcription, DNA-dependent                                         | ---                                         | -1.01         | 1.05            | -1.02     | -1.02       | -1.00     | -1.03       | 1.03       | 1.29         | 1.20       | 1.09         | 1.78       | 1.56         |
| SNAPC3               | small nuclear RNA activating protein 3            | chr9p22.3                 | transcription, DNA-dependent                                         | ---                                         | 1.23          | 1.10            | 1.28      | 1.30        | 1.53      | 1.20        | -1.04      | 1.22         | 1.71       | 1.99         | 1.69       | 2.20         |
| SNAPC3               | small nuclear RNA activating protein 3            | chr9p22.3                 | transcription, DNA-dependent                                         | ---                                         | -1.04         | 1.04            | -1.03     | 1.16        | 1.27      | 1.46        | -1.56      | -1.27        | -2.53      | -2.45        | -2.17      | -2.18        |
| SNAPC3               | small nuclear RNA activating protein 3            | chr9p22.3                 | transcription, DNA-dependent                                         | ---                                         | 1.04          | 1.21            | 1.12      | -1.03       | -1.34     | 1.12        | -1.23      | -1.02        | 1.02       | 1.61         | 1.44       | 1.44         |
| SNAPC3               | small nuclear RNA activating protein 3            | chr9p22.3                 | transcription, DNA-dependent                                         | ---                                         | 1.18          | 1.18            | 1.09      | -1.31       | -1.30     | -1.25       | 1.04       | 1.09         | 1.03       | 1.20         | 1.38       | 1.44         |
| SNAPC5               | small nuclear RNA activating protein 5            | chr15q22.31               | transcription, DNA-dependent                                         | ---                                         | 1.01          | -1.06           | 1.05      | 1.05        | 1.08      | 1.06        | 1.03       | 1.06         | 1.31       | 1.17         | 1.24       | 1.35         |
| SNAPC5               | small nuclear RNA activating protein 5            | chr15q22.31               | transcription, DNA-dependent                                         | ---                                         | 1.09          | 1.06            | -1.03     | -1.08       | -1.06     | -1.02       | 1.06       | -1.20        | 1.14       | 1.02         | 1.08       | 1.04         |
| SNAPC5               | small nuclear RNA activating protein 5            | chr15q22.31               | transcription, DNA-dependent                                         | ---                                         | -1.03         | -1.10           | -1.00     | 1.10        | 1.11      | 1.12        | 1.04       | -1.04        | 1.17       | 1.13         | 1.29       | 1.40         |
| SNAPIN               | SNAP-associated protein                           | chr14q21.3                | intracellular protein transport                                      | ---                                         | -1.17         | -1.11           | -1.02     | -1.04       | -1.02     | -1.08       | -1.24      | -1.16        | -1.44      | -1.21        | -1.23      | -1.08        |
| SNCA                 | synuclein, alpha (non A4 cytochrome c variant)    | chr4q21                   | microglial cell activation                                           | ---                                         | 1.18          | 1.17            | 1.04      | -1.16       | 1.02      | -1.00       | -1.31      | -1.11        | -2.00      | -1.79        | -1.58      | -2.03        |
| SNCA                 | synuclein, alpha (non A4 cytochrome c variant)    | chr4q21                   | microglial cell activation                                           | ---                                         | 1.07          | 1.16            | -1.06     | -1.14       | -1.04     | -1.21       | 1.09       | -1.01        | -1.05      | -1.14        | -1.18      | -1.31        |
| SNCA                 | synuclein, alpha (non A4 cytochrome c variant)    | chr4q21                   | microglial cell activation                                           | ---                                         | -1.04         | 1.05            | -1.01     | -1.17       | -1.02     | -1.04       | 1.06       | -1.07        | -1.20      | -1.17        | -1.35      | -1.51        |
| SNCA                 | synuclein, alpha (non A4 cytochrome c variant)    | chr4q21                   | microglial cell activation                                           | ---                                         | -1.01         | 1.07            | 1.03      | -1.14       | 1.02      | -1.04       | 1.04       | -1.07        | -1.12      | -1.16        | -1.31      | -1.45        |
| SNCA                 | synuclein, alpha (non A4 cytochrome c variant)    | chr4q21                   | microglial cell activation                                           | ---                                         | 1.01          | -1.01           | 1.00      | 1.02        | 1.04      | -1.01       | -1.25      | -1.08        | -1.45      | -1.35        | -1.58      | -1.52        |
| SNGC                 | synuclein, gamma (breast cancer variant)          | chr10q23.2-q23.3          | aggressive behavior                                                  | ---                                         | 1.05          | 1.10            | 1.03      | -1.07       | 1.08      | -1.15       | -1.27      | -1.17        | -1.11      | -1.14        | -1.31      | -1.40        |
| SDI1                 | staphylococcal nuclease and histone deacetylase 1 | chr7q31.3                 | transcription, DNA-dependent                                         | ---                                         | 1.04          | -1.01           | -1.04     | 1.00        | -1.03     | 1.13        | -1.01      | -1.04        | -1.07      | 1.02         | 1.05       | 1.14         |
| SNED1                | sushi, nidogen and EGF-like domain containing 1   | chr2q37.3                 | cell-matrix adhesion                                                 | ---                                         | 2.13          | 1.71            | 1.06      | -1.35       | -1.94     | -2.21       | 1.37       | 1.18         | -2.71      | -1.30        | -3.30      | -2.79        |
| SNHG1 /// SNHG10     | small nucleolar RNA host gene 1                   | chr11q12.3 /// chr10q23.3 | 0                                                                    | ---                                         | 1.01          | -1.01           | 1.01      | 1.12        | -1.03     | 1.03        | 1.10       | 1.05         | 1.17       | 1.18         | 1.26       | 1.21         |
| SNHG10               | small nucleolar RNA host gene 10                  | chr14q32.13               | 0                                                                    | ---                                         | -1.21         | 1.01            | -1.18     | -1.35       | 1.24      | 1.11        | 1.20       | -1.15        | -1.48      | -1.99        | -1.16      | -1.62        |
| SNHG10               | small nucleolar RNA host gene 10                  | chr14q32.13               | 0                                                                    | ---                                         | 1.20          | 1.24            | 1.21      | 1.27        | 1.02      | 1.13        | -1.65      | -1.15        | -2.88      | -2.27        | -1.58      | -1.97        |
| SNHG16 /// SNHG17    | small nucleolar RNA host gene 16                  | chr17q25.1                | 0                                                                    | ---                                         | -1.09         | -1.05           | -1.01     | -1.02       | 1.06      | -1.01       | 1.18       | -1.00        | 1.10       | -1.05        | 1.05       | 1.02         |
| SNHG3 /// SNHG4      | small nucleolar RNA host gene 3                   | chr1p36.1                 | 0                                                                    | ---                                         | -1.29         | -1.40           | 1.15      | 1.21        | 1.11      | 1.04        | 1.02       | 1.16         | 1.02       | -1.08        | 1.26       | 1.49         |
| SNHG4                | small nucleolar RNA host gene 4                   | chr5q31.2                 | 0                                                                    | ---                                         | 1.21          | -1.23           | 1.09      | -1.29       | 1.35      | 1.14        | 1.72       | 1.17         | -1.17      | -1.33        | -2.05      | -2.04        |
| SNHG6 /// SNHG7      | small nucleolar RNA host gene 6                   | chr8q13.1 /// chr8q10     | 0                                                                    | ---                                         | -1.02         | -1.04           | -1.03     | 1.09        | -1.11     | -1.04       | 1.08       | 1.24         | 1.24       | 1.11         | 1.09       | 1.16         |
| SNHG7 /// SNHG8      | small nucleolar RNA host gene 7                   | chr9q34.3                 | 0                                                                    | ---                                         | 1.37          | 1.32            | -1.10     | 1.05        | -1.09     | -1.07       | 1.51       | 1.33         | 1.20       | -1.21        | 1.20       | -1.02        |
| SNHG8 /// SNHG9      | small nucleolar RNA host gene 8                   | chr4q26                   | 0                                                                    | ---                                         | 1.05          | 1.03            | 1.04      | 1.06        | 1.11      | 1.00        | 1.61       | 1.20         | 1.05       | -1.25        | 1.60       | 1.31         |
| SNIP1                | Smad nuclear interacting protein 1                | chr1p34.3                 | regulation of transcription, DNA-dependent                           | ---                                         | -1.05         | 1.04            | 1.13      | -1.16       | -1.07     | -1.00       | 1.00       | -1.06        | 1.18       | 1.13         | 1.23       | 1.10         |
| SNIP1                | Smad nuclear interacting protein 1                | chr1p34.3                 | regulation of transcription, DNA-dependent                           | ---                                         | 1.00          | 1.06            | -1.01     | 1.05        | 1.20      | 1.01        | 1.14       | 1.09         | 1.11       | 1.13         | 1.30       | 1.16         |
| SNN                  | stannin                                           | chr16p13                  | response to stress                                                   | ---                                         | 1.02          | -1.05           | 1.11      | -1.09       | 1.17      | 1.21        | -1.33      | -1.25        | -1.13      | -1.28        | 1.23       | 1.09         |
| SNORA29 /// SNORA5B  | small nucleolar RNA, H/ACA box                    | chr6q25.3 /// chr6q25.3   | protein folding                                                      | ---                                         | -1.01         | 1.02            | -1.07     | 1.03        | -1.07     | -1.02       | -1.12      | -1.03        | 1.17       | 1.10         | 1.63       | 1.70         |
| SNORA5B /// SNORA71B | small nucleolar RNA, H/ACA box                    | chr7p13                   | G1 phase of mitotic cell cycle                                       | ---                                         | -1.23         | -1.38           | -1.10     | 1.04        | 1.22      | -1.06       | 1.24       | 1.17         | 1.44       | 1.56         | 1.42       | 1.34         |
| SNORA71B             | small nucleolar RNA, H/ACA box                    | chr20q11.23               | 0                                                                    | ---                                         | -1.02         | -1.07           | -1.80     | -2.19       | 1.21      | 3.72        | -1.08      | -1.02        | -1.09      | 1.00         | 1.68       | 1.52         |
| SNORD50A             | small nucleolar RNA, C/D box                      | chr6q14.3                 | 0                                                                    | ---                                         | 1.43          | 1.41            | -1.00     | 1.18        | 1.20      | 1.19        | -1.11      | 1.34         | -1.56      | -1.33        | -1.21      | -1.76        |
| SNORD8               | small nucleolar RNA, C/D box                      | chr14q11.2                | 0                                                                    | ---                                         | -2.27         | -1.83           | 1.40      | -1.21       | 2.36      | 3.07        | -1.80      | -1.43        | -1.21      | -1.96        | 1.65       | 2.03         |
| SNRK                 | SNF related kinase                                | chr3p22.1                 | protein phosphorylation                                              | ---                                         | -1.10         | 1.26            | 1.11      | 1.11        | 2.24      | 1.28        | -1.14      | -1.35        | -1.09      | -1.16        | -1.80      | -1.63        |
| SNRK                 | SNF related kinase                                | chr3p22.1                 | protein phosphorylation                                              | ---                                         | -1.04         | -1.02           | 1.01      | 1.15        | 1.10      | 1.09        | -1.03      | -1.02        | 1.21       | 1.26         | 1.25       | 1.26         |
| SNRNP25              | small nuclear ribonucleoprotein 25                | chr16p13.3                | mRNA processing                                                      | ---                                         | -1.03         | -1.03           | 1.01      | 1.05        | 1.01      | -1.13       | -1.00      | 1.03         | -1.18      | -1.43        | -2.25      | -2.04        |
| SNRNP27              | small nuclear ribonucleoprotein 27                | chr2p13.3                 | mRNA processing                                                      | ---                                         | 1.17          | 1.07            | -1.24     | -1.08       | -1.11     | -1.14       | -1.08      | 1.09         | 1.58       | 1.56         | 1.84       | 1.66         |
| SNRNP48              | small nuclear ribonucleoprotein 48                | chr6p24.3                 | mRNA processing                                                      | ---                                         | -1.12         | 1.08            | -1.01     | -1.15       | -1.03     | -1.06       | -1.13      | -1.25        | -1.31      | -1.48        | -1.03      | -1.22        |
| SNRNP48              | small nuclear ribonucleoprotein 48                | chr6p24.3                 | mRNA processing                                                      | ---                                         | 1.03          | 1.01            | -1.01     | -1.08       | 1.09      | 1.10        | 1.00       | -1.03        | 1.06       | -1.18        | 1.08       | 1.01         |
| SNRNP70              | small nuclear ribonucleoprotein 70                | chr19q13.3                | mRNA splicing, via spliceosome                                       | mRNA_processing_Reactome // GenMAPP         | 1.07          | 1.04            | 1.16      | 1.20        | -1.06     | -1.17       | 1.18       | 1.13         | 1.63       | 1.67         | 1.17       | 1.05         |
| SNRNP70              | small nuclear ribonucleoprotein 70                | chr19q13.3                | mRNA splicing, via spliceosome                                       | mRNA_processing_Reactome // GenMAPP         | -1.13         | 1.92            | 1.14      | -1.02       | 1.21      | 3.74        | 1.02       | -1.68        | -4.84      | -3.32        | -1.69      | -1.55        |
| SNRPA                | small nuclear ribonucleoprotein A                 | chr19q13.1                | mRNA splicing, via spliceosome                                       | mRNA_processing_Reactome // GenMAPP         | 1.03          | -1.08           | 1.14      | 1.24        | 1.05      | 1.03        | 1.08       | -1.08        | 1.46       | 1.28         | -1.02      | 1.10         |
| SNRPA1               | small nuclear ribonucleoprotein A1                | chr15q26.3                | mRNA splicing, via spliceosome                                       | mRNA_processing_Reactome // GenMAPP         | 1.00          | 1.02            | -1.02     | 1.02        | 1.02      | -1.07       | 1.18       | 1.08         | 2.03       | 1.65         | 1.95       | 1.89         |
| SNRPA1               | small nuclear ribonucleoprotein A1                | chr15q26.3                | mRNA splicing, via spliceosome                                       | mRNA_processing_Reactome // GenMAPP         | 1.06          | 1.05            | -1.01     | 1.06        | -1.06     | 1.09        | 1.09       | 1.02         | 1.72       | 1.68         | 1.66       | 1.57         |
| SNRPA1               | small nuclear ribonucleoprotein A1                | chr15q26.3                | mRNA splicing, via spliceosome                                       | mRNA_processing_Reactome // GenMAPP         | 1.01          | 1.03            | 1.00      | 1.02        | -1.00     | -1.04       | 1.22       | 1.11         | 1.99       | 1.62         | 2.05       | 2.04         |
| SNRPB                | small nuclear ribonucleoprotein B                 | chr20p13                  | spliceosomal snRNP assembly                                          | mRNA_processing_Reactome // GenMAPP         | -1.00         | 1.00            | -1.02     | -1.11       | -1.01     | 1.01        | -1.09      | -1.15        | -1.20      | -1.20        | -1.28      | -1.35        |
| SNRPB                | small nuclear ribonucleoprotein B                 | chr20p13                  | spliceosomal snRNP assembly                                          | mRNA_processing_Reactome // GenMAPP         | 1.05          | 1.03            | -1.04     | 1.01        | 1.04      | -1.01       | 1.11       | -1.09        | 1.15       | -1.01        | -1.13      | -1.21        |
| SNRPD1               | small nuclear ribonucleoprotein D1                | chr18q11.2                | spliceosomal complex assembly                                        | mRNA_processing_binding_Reactome // GenMAPP | 1.18          | 1.14            | -1.01     | -1.03       | 1.06      | 1.02        | -1.18      | -1.11        | -1.58      | -1.29        | -1.49      | -1.84        |
| SNRPF                | small nuclear ribonucleoprotein F                 | chr12q23.1                | spliceosomal snRNP assembly                                          | mRNA_processing_binding_Reactome // GenMAPP | 1.03          | -1.00           | -1.01     | -1.07       | -1.09     | -1.03       | -1.04      | -1.13        | 1.22       | 1.11         | 1.01       | -1.18        |
| SNRPN /// SNRPN1     | small nuclear ribonucleoprotein P                 | chr15q11.2 /// chr15q11.2 | mRNA splicing                                                        | mRNA_processing_binding_Reactome // GenMAPP | 1.17          | 1.35            | 1.43      | 1.36        | -1.17     | 1.07        | -1.22      | -1.29        | -1.92      | -1.83        | -3.12      | -1.98        |
| SNTA1                | syntrophin, alpha 1                               | chr20q11.2                | regulation of heart rate                                             | ---                                         | -1.02         | -1.16           | -1.05     | -1.11       | 1.00      | -1.09       | 1.42       | 1.01         | 1.47       | 1.24         | 1.04       | -1.00        |
| SNTB1                | syntrophin, beta 1 (dystrophin)                   | chr8q23-q24               | muscle contraction                                                   | ---                                         | 1.04          | 1.52            | -1.70     | -1.50       | 1.65      | 1.31        | 2.49       | 1.97         | 1.07       | -1.10        | 1.04       | 1.81         |
| SNTB1                | syntrophin, beta 1 (dystrophin)                   | chr8q23-q24               | muscle contraction                                                   | ---                                         | -1.07         | -1.15           | -1.05     | -1.14       | 1.05      | 1.02        | 1.03       | -1.01        | 1.08       | 1.64         | 1.15       | 1.19         |
| SNTB2                | syntrophin, beta 2 (dystrophin)                   | chr16q22.1                | 0                                                                    | ---                                         | -1.25         | -1.15           | 1.03      | -1.04       | 1.15      | 1.02        | -1.10      | -1.07        | -1.49      | -1.43        | -1.06      | 1.09         |
| SNTB2                | syntrophin, beta 2 (dystrophin)                   | chr16q22.1                | 0                                                                    | ---                                         | 1.06          | 1.03            | 1.06      | -1.09       | -1.02     | 1.02        | -1.31      | -1.17        | -2.00      | -1.42        | -1.77      | -1.86        |
| SNTB2                | syntrophin, beta 2 (dystrophin)                   | chr16q22.1                | 0                                                                    | ---                                         | 1.04          | 1.06            | 1.07      | 1.01        | -1.01     | -1.06       | -1.27      | -1.23        | -1.91      | -1.34        | -1.62      | -1.44        |
| SNTB2                | syntrophin, beta 2 (dystrophin)                   | chr16q22.1                | 0                                                                    | ---                                         | -1.03         | -1.06           | 1.24      | -1.12       | 1.03      | -1.05       | -1.15      | -1.32        | -1.78      | -1.34        | -1.25      | -1.20        |
| SNW1                 | SNW domain containing 1                           | chr14q24.3                | negative regulation of transcription from RNA polymerase II promoter | ---                                         | -1.15         | -1.16           | -1.03     | 1.12        | -1.03     | -1.05       | -1.02      | -1.09        | -1.05      | -1.01        | 1.21       | 1.23         |
| SNX1                 | sorting nexin 1                                   | chr15q22.31               | transport                                                            | ---                                         | 1.03          | -1.14           | 2.11      | 2.16        | 1.27      | 1.04        | -1.05      | -1.06        | -1.40      | -1.26        | -2.53      | -1.28        |
| SNX1                 | sorting nexin 1                                   | chr15q22.31               | transport                                                            | ---                                         | 1.06          | -1.11           | -1.04     | 1.01        | 1.13      | 1.05        | -1.17      | -1.35        | -1.12      | -1.12        | -1.03      | 1.07         |
| SNX1                 | sorting nexin 1                                   | chr15q22.31               | transport                                                            | ---                                         | 1.15          | 1.14            | 1.02      | 1.05        | -1.02     | 1.01        | -1.29      | -1.05        | -1.20      | -1.29        | -1.71      | -1.80        |
| SNX1                 | sorting nexin 1                                   | chr15q22.31               | transport                                                            | ---                                         | -1.12         | -1.11           | -1.02     | -1.10       | 1.08      | -1.04       | 1.07       | -1.08        | -1.31      | -1.22        | -1.01      | -1.07        |

| ID          | Gene Title                   | Chromosomal Location | 1st Gene Ontology Biological Process         | Pathway                            | A2497 30 mins | A2497P' 30 mins | A2497 2 h | A2497P' 2 h | A2497 4 h | A2497P' 4 h | A2497 24 h | A2497P' 24 h | A2497 48 h | A2497P' 48 h | A2497 72 h | A2497P' 72 h |
|-------------|------------------------------|----------------------|----------------------------------------------|------------------------------------|---------------|-----------------|-----------|-------------|-----------|-------------|------------|--------------|------------|--------------|------------|--------------|
| SNX11       | sorting nexin 11             | chr17q21.32          | transport                                    | ---                                | 1.05          | 1.02            | -1.08     | 1.08        | 1.29      | -1.03       | 1.09       | 1.06         | 1.04       | 1.08         | 1.15       | 1.31         |
| SNX11       | sorting nexin 11             | chr17q21.32          | transport                                    | ---                                | -1.05         | -1.09           | -1.03     | -1.02       | 1.09      | -1.05       | -1.10      | 1.10         | 1.33       | 1.13         | 1.28       | 1.32         |
| SNX12       | sorting nexin 12             | chrXq13.1            | transport                                    | ---                                | -1.11         | -1.05           | 1.01      | -1.06       | 1.07      | 1.19        | 1.17       | -1.00        | 1.10       | 1.28         | -1.20      | -1.08        |
| SNX12       | sorting nexin 12             | chrXq13.1            | transport                                    | ---                                | 1.09          | 1.05            | 1.14      | 1.11        | 1.07      | 1.02        | 1.11       | 1.08         | -1.05      | -1.14        | -1.38      | -1.39        |
| SNX13       | sorting nexin 13             | chr7p21.1            | transport                                    | ---                                | -1.34         | -2.06           | 1.07      | -2.06       | 1.21      | 1.28        | 6.08       | 4.33         | 1.56       | 1.08         | -1.60      | -3.02        |
| SNX16       | sorting nexin 16             | chr8q21.13           | protein targeting to lysosome                | ---                                | 1.36          | 1.94            | 1.22      | -1.10       | 1.35      | 1.59        | -1.10      | -1.46        | 1.73       | 1.13         | 1.38       | 1.12         |
| SNX18       | sorting nexin 18             | chr5q11.2            | mitotic cytokinesis                          | ---                                | 5.43          | 2.07            | -1.52     | -5.31       | -1.09     | 2.35        | 3.26       | -3.42        | 2.47       | -4.15        | 1.05       | -1.09        |
| SNX18P3 /// | sorting nexin 18 pseudogen   | ---                  | 0                                            | ---                                | 1.43          | 1.62            | -1.01     | 1.12        | -1.07     | -1.18       | 1.23       | 1.08         | -2.19      | -4.17        | -2.00      | -1.34        |
| SNX19       | sorting nexin 19             | chr11q25             | transport                                    | ---                                | 1.07          | 1.01            | 1.06      | -1.01       | 1.12      | 1.20        | 1.11       | -1.03        | -1.67      | -1.41        | -1.53      | -1.70        |
| SNX2        | sorting nexin 2              | chr5q23              | transport                                    | ---                                | 1.08          | -1.01           | -1.13     | -1.17       | -1.60     | -1.40       | -1.44      | -1.15        | -2.16      | -2.35        | -1.91      | -3.70        |
| SNX21       | sorting nexin family memb    | chr20q13.12          | transport                                    | ---                                | -1.04         | -1.10           | -1.01     | -1.03       | 1.17      | 1.01        | -1.02      | -1.03        | -1.72      | -1.56        | -1.11      | -1.12        |
| SNX24       | sorting nexin 24             | chr5q23.2            | transport                                    | ---                                | -1.21         | 2.98            | 3.48      | 3.60        | 1.72      | -1.01       | 3.04       | 1.87         | 4.09       | 1.43         | -1.02      | 2.06         |
| SNX24       | sorting nexin 24             | chr5q23.2            | cell communication                           | ---                                | -1.70         | -1.50           | 1.19      | 1.36        | 1.18      | 1.76        | -2.33      | -2.12        | 1.15       | 1.12         | 1.89       | 2.15         |
| SNX25       | sorting nexin 25             | chr4q35.1            | cell communication                           | ---                                | 1.01          | -1.04           | 1.18      | 1.04        | 1.02      | -1.13       | -1.39      | -1.51        | 1.36       | 1.21         | 1.36       | 1.66         |
| SNX25       | sorting nexin 25             | chr4q35.1            | transport                                    | ---                                | 1.04          | 1.07            | 1.04      | -1.18       | 1.06      | -1.11       | 1.04       | -1.12        | 1.11       | 1.29         | 1.54       | 1.52         |
| SNX27       | sorting nexin family memb    | chr1q21.3            | establishment of natural killer cell polarit | ---                                | 1.13          | 1.06            | -1.04     | -1.03       | 1.05      | 1.08        | -1.05      | -1.08        | -1.16      | -1.02        | -1.39      | -1.72        |
| SNX30       | sorting nexin family memb    | chr9q32              | transport                                    | ---                                | 1.61          | 1.39            | 1.17      | 1.04        | -1.06     | -1.16       | -1.22      | -1.17        | -1.92      | -1.93        | -1.36      | -1.84        |
| SNX31       | sorting nexin 31             | chr8q22.3            | transport                                    | ---                                | -1.01         | 2.03            | -1.24     | -2.24       | 2.93      | 3.10        | -2.50      | -1.51        | 6.20       | 3.69         | 2.32       | 2.62         |
| SNX33       | sorting nexin 33             | chr15q24.2           | mitotic cytokinesis                          | ---                                | 1.19          | -1.05           | 1.05      | 1.09        | -1.04     | 1.02        | 1.84       | 1.40         | 2.62       | 2.33         | 1.89       | 2.72         |
| SNX33       | sorting nexin 33             | chr15q24.2           | mitotic cytokinesis                          | ---                                | -1.21         | -1.39           | -1.18     | -1.06       | -1.00     | 1.03        | 1.05       | 1.13         | 1.15       | 1.53         | -1.06      | 1.17         |
| SNX4        | sorting nexin 4              | chr3q21.2            | transport                                    | ---                                | 1.20          | 1.24            | -1.18     | -1.36       | -1.15     | 1.05        | -1.12      | -1.03        | -1.72      | -1.34        | -1.39      | -1.72        |
| SNX4        | sorting nexin 4              | chr3q21.2            | transport                                    | ---                                | -1.19         | -1.19           | -1.01     | 1.08        | 1.07      | -1.08       | 1.10       | 1.15         | 1.16       | 1.07         | 1.28       | 1.22         |
| SNX5        | sorting nexin 5              | chr20p11             | transport                                    | ---                                | -1.00         | 1.03            | 1.01      | 1.03        | -1.01     | -1.03       | 1.21       | 1.03         | 1.17       | 1.12         | 1.28       | 1.24         |
| SNX5        | sorting nexin 5              | chr20p11             | transport                                    | ---                                | -1.01         | 1.06            | -1.03     | -1.06       | -1.05     | -1.09       | 1.07       | 1.08         | 1.09       | 1.10         | 1.15       | 1.12         |
| SNX5        | sorting nexin 5              | chr20p11             | transport                                    | ---                                | -1.28         | -1.26           | 1.06      | 1.08        | 1.10      | -1.01       | 1.57       | 1.25         | 2.46       | 1.88         | 1.40       | 1.39         |
| SNX5        | sorting nexin 5              | chr20p11             | transport                                    | ---                                | -1.08         | -1.06           | 1.09      | 1.01        | 1.03      | -1.02       | 1.05       | -1.03        | -1.28      | -1.16        | -1.21      | -1.27        |
| SNX6        | sorting nexin 6              | chr14q13.1           | transport                                    | ---                                | 1.01          | -1.18           | -1.06     | 1.14        | -1.03     | 1.08        | -1.20      | -1.02        | -1.27      | -1.22        | -1.09      | -1.35        |
| SNX6        | sorting nexin 6              | chr14q13.1           | transport                                    | ---                                | -1.11         | -1.04           | -1.01     | 1.04        | 1.05      | -1.02       | 1.04       | -1.02        | 1.02       | 1.19         | 1.28       | 1.28         |
| SNX7        | sorting nexin 7              | chr1p21.3            | transport                                    | ---                                | 1.12          | 1.12            | 1.07      | -1.05       | -1.07     | 1.02        | -1.05      | 1.00         | -1.66      | -1.45        | -1.67      | -2.12        |
| SNX9        | sorting nexin 9              | chr6q25.1-q26        | mitotic cytokinesis                          | ---                                | -1.11         | -1.08           | 1.02      | -1.08       | 1.00      | 1.01        | 1.05       | 1.09         | -1.10      | 1.02         | 1.12       | 1.10         |
| SOAT1       | sterol O-acyltransferase 1   | chr1q25              | lipid metabolic process                      | Statin_Pathway_PharmGKB // GenMAPP | 1.13          | 1.03            | 1.03      | -1.03       | -1.06     | 1.09        | -1.15      | -1.08        | -1.98      | -1.57        | -1.32      | -1.82        |
| SOAT1       | sterol O-acyltransferase 1   | chr1q25              | lipid metabolic process                      | Statin_Pathway_PharmGKB // GenMAPP | 1.03          | 1.02            | -1.15     | -1.14       | -1.01     | 1.01        | -1.18      | -1.03        | -2.34      | -1.71        | -1.46      | -1.57        |
| SOAT1       | sterol O-acyltransferase 1   | chr1q25              | lipid metabolic process                      | Statin_Pathway_PharmGKB // GenMAPP | -1.06         | -1.05           | -1.06     | -1.01       | -1.06     | 1.12        | -1.35      | -1.10        | -1.45      | -1.30        | -1.49      | -1.53        |
| SOBP        | sine oculis binding protein  | chr6p21              | sensory perception of sound                  | ---                                | -1.37         | 1.02            | -1.05     | -1.06       | -1.06     | 1.13        | 1.08       | -1.08        | -1.59      | -1.48        | -1.62      | -3.04        |
| SOC52       | suppressor of cytokine sign  | chr12q               | regulation of cell growth                    | ---                                | -1.01         | -1.26           | 1.07      | 1.07        | 1.15      | 1.09        | -1.41      | -1.52        | -1.21      | -1.05        | 2.10       | 1.59         |
| SOC52       | suppressor of cytokine sign  | chr12q               | regulation of cell growth                    | ---                                | -1.12         | 1.68            | -1.83     | -1.56       | 1.49      | 1.23        | -2.91      | -1.94        | 2.88       | 1.68         | 2.00       | 2.00         |
| SOC52-AS1   | SOC52 antisense RNA 1        | chr12q22             | 0                                            | ---                                | -1.71         | -3.30           | 2.71      | 2.79        | -1.98     | -1.04       | -3.42      | -3.01        | 4.65       | 4.12         | 1.58       | 1.73         |
| SOC53       | suppressor of cytokine sign  | chr17q25.3           | response to hypoxia                          | ---                                | -1.03         | -1.18           | -1.22     | -1.68       | -1.19     | 1.11        | 1.72       | 1.38         | 1.43       | 1.74         | 1.09       | -1.03        |
| SOC53       | suppressor of cytokine sign  | chr17q25.3           | response to hypoxia                          | ---                                | 1.39          | 1.21            | -1.27     | -1.17       | -1.45     | 1.00        | 1.03       | 1.11         | 2.08       | 2.49         | -1.10      | 1.08         |
| SOC54       | suppressor of cytokine sign  | chr14q22.1           | negative regulation of epidermal growth      | ---                                | 1.10          | 1.09            | 1.13      | -1.07       | 1.14      | 1.15        | -1.28      | -1.09        | -1.22      | -1.06        | 1.42       | -1.05        |
| SOC54       | suppressor of cytokine sign  | chr14q22.1           | negative regulation of epidermal growth      | ---                                | 1.25          | 1.20            | 1.02      | -1.06       | 1.07      | 1.11        | -1.38      | -1.31        | -1.55      | -1.30        | -1.39      | -1.43        |
| SOC55       | suppressor of cytokine sign  | chr2p21              | epidermal growth factor receptor signalin    | ---                                | -1.02         | 1.01            | 1.20      | 1.09        | -1.04     | -1.02       | -1.09      | -1.03        | 1.08       | 1.23         | 1.31       | 1.11         |
| SOC55       | suppressor of cytokine sign  | chr2p21              | epidermal growth factor receptor signalin    | ---                                | 1.23          | 1.12            | 1.09      | -1.07       | -1.07     | 1.06        | -1.05      | 1.08         | -1.14      | 1.01         | 1.06       | 1.10         |
| SOC56       | suppressor of cytokine sign  | chr18q22.2           | defense response                             | ---                                | 1.16          | -1.08           | 1.26      | 1.01        | 1.07      | -1.03       | 1.49       | 1.24         | 1.17       | 1.03         | -1.06      | -1.10        |
| SOC56       | suppressor of cytokine sign  | chr18q22.2           | defense response                             | ---                                | 1.12          | 1.14            | 1.06      | -1.02       | -1.07     | 1.05        | 1.13       | 1.08         | 1.13       | 1.26         | 1.04       | 1.00         |
| SOC56       | suppressor of cytokine sign  | chr18q22.2           | defense response                             | ---                                | 1.37          | 1.16            | -1.16     | -1.13       | -1.02     | 1.22        | 1.21       | 1.14         | 1.17       | 1.08         | -1.17      | -1.21        |
| SOC57       | suppressor of cytokine sign  | chr17q12             | insulin receptor signaling pathway           | ---                                | 1.09          | 1.00            | 1.06      | 1.04        | -1.06     | -1.07       | 1.03       | -1.02        | -1.05      | -1.08        | 1.09       | 1.03         |
| SOD2        | superoxide dismutase 2, mit  | chr6q25.3            | response to superoxide                       | ---                                | 1.04          | 1.10            | -1.05     | 1.02        | -1.05     | 1.04        | 1.28       | 1.12         | 1.77       | 1.52         | 1.45       | 1.35         |
| SOD3        | superoxide dismutase 3, extr | chr4p15.2            | response to hypoxia                          | ---                                | -1.48         | -2.37           | -2.64     | -1.22       | 1.99      | 1.38        | 1.30       | 1.29         | 1.22       | 2.03         | 1.94       | 3.85         |
| SOGA1       | suppressor of glucose, auto  | chr20q11.23          | regulation of autophagy                      | ---                                | 1.02          | 1.07            | 1.20      | -1.34       | 1.16      | -1.03       | 1.43       | -1.35        | 1.73       | 1.63         | 1.41       | 1.24         |
| SOGA2       | SOGA family member 2         | chr18p11.22          | regulation of autophagy                      | ---                                | 1.06          | 1.06            | 1.04      | 1.15        | 1.08      | -1.00       | -1.05      | -1.03        | -1.95      | -1.57        | -1.59      | -1.57        |
| SOLH        | small optic lobes homolog    | chr16p13.3           | regulation of transcription, DNA-depend      | ---                                | -1.02         | -1.10           | -1.09     | 1.11        | 1.11      | 1.01        | 1.01       | 1.29         | -2.51      | -2.03        | -2.58      | -2.80        |
| SON         | SON DNA binding protein      | chr21q22.11          | microtubule cytoskeleton organization        | ---                                | -1.03         | -1.04           | 1.03      | 1.06        | -1.00     | 1.08        | -1.15      | -1.02        | -1.03      | 1.05         | -1.09      | -1.04        |
| SON         | SON DNA binding protein      | chr21q22.11          | microtubule cytoskeleton organization        | ---                                | -1.00         | -1.03           | 1.09      | 1.04        | 1.12      | 1.02        | 1.21       | 1.08         | 1.15       | 1.07         | 1.12       | 1.03         |
| SON         | SON DNA binding protein      | chr21q22.11          | microtubule cytoskeleton organization        | ---                                | -1.06         | -1.02           | 1.01      | 1.00        | 1.04      | 1.03        | -1.07      | -1.07        | -1.05      | -1.05        | -1.01      | -1.01        |
| SORBS2      | sorbin and SH3 domain con    | chr4q35.1            | protein import into nucleus                  | ---                                | 1.07          | 1.00            | -1.02     | -1.08       | -1.06     | 1.02        | -1.07      | -1.06        | -2.22      | -1.81        | -2.20      | -2.32        |
| SORBS2      | sorbin and SH3 domain con    | chr4q35.1            | 0                                            | ---                                | 1.03          | 1.17            | -1.17     | -1.21       | 1.22      | 1.27        | 1.25       | -1.07        | -4.50      | -3.52        | -3.89      | -3.51        |
| SORBS2      | sorbin and SH3 domain con    | chr4q35.1            | 0                                            | ---                                | 1.54          | 1.45            | -1.01     | 1.22        | 1.30      | 1.69        | 1.34       | 1.26         | -2.97      | -1.93        | -2.52      | -2.65        |
| SORBS2      | sorbin and SH3 domain con    | chr4q35.1            | 0                                            | ---                                | -1.10         | -1.18           | 1.05      | -1.07       | 1.07      | 1.05        | -1.02      | -1.01        | -2.59      | -2.27        | -2.44      | -2.29        |
| SORBS2      | sorbin and SH3 domain con    | chr4q35.1            | 0                                            | ---                                | 1.01          | -1.08           | 1.04      | 1.12        | 1.34      | 1.31        | 1.03       | -1.12        | -2.17      | -1.68        | -1.90      | -2.28        |
| SORBS2      | sorbin and SH3 domain con    | chr4q35.1            | 0                                            | ---                                | -1.01         | 1.01            | -1.01     | 1.05        | 1.18      | 1.02        | 1.12       | -1.12        | -2.97      | -2.52        | -2.62      | -2.70        |
| SORCS1      | sortilin-related VPS10 dom   | chr10q23-q25         | neuropeptide signaling pathway               | ---                                | 2.51          | 1.83            | 2.10      | -1.32       | -1.45     | 1.52        | 1.26       | 2.64         | 6.56       | 13.56        | 14.79      | 4.69         |
| SORCS3-AS   | SORCS3 antisense RNA 1       | ---                  | 0                                            | ---                                | -2.93         | 1.18            | -7.30     | -2.04       | 10.53     | 2.93        | -1.45      | 1.86         | 1.09       | -1.04        | -2.31      | -1.94        |
| SORL1       | sortilin-related receptor, L | chr11q23.2-q24.2     | protein targeting                            | ---                                | -1.08         | -1.02           | 1.18      | 1.17        | 1.22      | 1.17        | -1.03      | -1.07        | -1.46      | -1.22        | -1.82      | -1.64        |
| SORL1       | sortilin-related receptor, L | chr11q23.2-q24.2     | protein targeting                            | ---                                | 1.04          | 1.11            | 1.13      | 1.17        | 1.17      | 1.17        | -1.12      | -1.07        | -1.12      | -1.03        | -1.51      | -1.48        |
| SORT1       | sortilin 1                   | chr1p13.3 1p21.3-p   | ossification                                 | ---                                | -1.06         | -1.01           | 1.01      | -1.02       | 1.07      | -1.02       | 1.11       | -1.01        | -1.44      | -1.26        | -1.81      | -1.59        |

| ID           | Gene Title                     | Chromosomal Location  | 1st Gene Ontology Biological Process      | Pathway                                   | A2497 30 mins | A2497P' 30 mins | A2497 2 h | A2497P' 2 h | A2497 4 h | A2497P' 4 h | A2497 24 h | A2497P' 24 h | A2497 48 h | A2497P' 48 h | A2497 72 h | A2497P' 72 h |
|--------------|--------------------------------|-----------------------|-------------------------------------------|-------------------------------------------|---------------|-----------------|-----------|-------------|-----------|-------------|------------|--------------|------------|--------------|------------|--------------|
| SORT1        | sortilin 1                     | chr1p13.31p21.3-p     | ossification                              | ---                                       | 1.03          | -1.12           | 1.14      | 1.21        | 1.03      | -1.06       | 1.23       | -1.04        | 1.14       | 1.01         | 1.03       | 1.20         |
| SOS1         | son of sevenless homolog 2     | chr2p21               | apoptotic process                         | Integrin-mediated_cell_adhesion_KEGG // C | -1.15         | -1.10           | 1.17      | 1.03        | -1.01     | -1.01       | -1.31      | -1.10        | -1.48      | -1.11        | -1.35      | -1.14        |
| SOS1         | son of sevenless homolog 2     | chr2p21               | apoptotic process                         | Integrin-mediated_cell_adhesion_KEGG // C | -1.18         | 1.44            | 1.02      | -1.35       | 1.03      | 1.30        | 1.27       | -1.05        | -2.52      | -1.70        | -3.09      | -2.04        |
| SOS1         | son of sevenless homolog 2     | chr2p21               | apoptotic process                         | Integrin-mediated_cell_adhesion_KEGG // C | 1.36          | 1.31            | -1.13     | -1.17       | -1.89     | -1.53       | -1.20      | -1.34        | -3.08      | -3.48        | -1.73      | -2.72        |
| SOS1         | son of sevenless homolog 2     | chr2p21               | apoptotic process                         | Integrin-mediated_cell_adhesion_KEGG // C | 1.03          | -1.05           | -1.03     | 1.06        | 1.15      | 1.18        | -1.18      | -1.06        | -1.78      | -1.29        | -1.20      | -1.21        |
| SOS2         | son of sevenless homolog 2     | chr14q21              | apoptotic process                         | ---                                       | 1.11          | 1.29            | 1.06      | -1.00       | -1.37     | -1.08       | -1.19      | 1.08         | -1.64      | -1.36        | -1.21      | -1.25        |
| SOWAHC       | soosondowah ankryrin repeat    | chr2q13               | 0                                         | ---                                       | 1.19          | 1.15            | 1.11      | 1.09        | 1.18      | 1.21        | -1.02      | -1.10        | 1.53       | 1.38         | 1.65       | 1.44         |
| SOWAHC       | soosondowah ankryrin repeat    | chr2q13               | 0                                         | ---                                       | 1.05          | 1.09            | 1.09      | -1.21       | 1.05      | 1.07        | 1.05       | -1.10        | 1.68       | 1.48         | 1.66       | 1.55         |
| SOX12        | SRY (sex determining region Y) | chr20p13              | transcription, DNA-dependent              | ---                                       | 1.01          | -1.04           | -1.03     | -1.03       | -1.04     | -1.15       | -1.01      | -1.05        | -1.62      | -1.35        | -1.50      | -1.53        |
| SOX13        | SRY (sex determining region Y) | chr1q32               | transcription, DNA-dependent              | ---                                       | 1.06          | 1.08            | -1.12     | -1.17       | -1.11     | -1.09       | 1.30       | 1.31         | 1.02       | 1.10         | -1.26      | -1.08        |
| SOX17        | SRY (sex determining region Y) | chr8q11.23            | negative regulation of transcription from | ---                                       | 1.29          | 1.23            | -1.26     | -1.41       | -1.08     | -1.07       | -1.41      | 1.12         | -2.29      | -3.21        | -1.01      | -2.22        |
| SOX2         | SRY (sex determining region Y) | chr3q26.3-q27         | negative regulation of transcription from | ---                                       | 1.98          | -1.10           | -3.26     | -1.50       | 3.42      | -1.61       | 2.02       | 1.91         | -1.16      | 1.33         | -1.34      | -1.09        |
| SOX21-AS1    | SOX21 antisense RNA 1          | chr13q32.1            | 0                                         | ---                                       | -1.95         | -2.24           | -1.49     | -1.47       | -1.42     | 1.46        | -1.07      | 1.68         | -3.07      | 1.12         | 1.57       | 1.97         |
| SOX4         | SRY (sex determining region Y) | chr6p22.3             | skeletal system development               | ---                                       | -1.10         | -1.08           | 1.12      | 1.09        | 1.23      | 1.10        | -1.21      | -1.15        | -1.71      | -1.86        | -1.87      | -2.10        |
| SOX4         | SRY (sex determining region Y) | chr6p22.3             | skeletal system development               | ---                                       | 1.17          | 1.19            | -1.04     | -1.03       | 1.06      | 1.07        | -1.38      | -1.37        | -2.40      | -1.91        | -1.61      | -2.02        |
| SOX4         | SRY (sex determining region Y) | chr6p22.3             | skeletal system development               | ---                                       | -1.26         | -1.22           | 1.30      | 1.13        | 1.06      | -1.05       | 1.07       | 1.03         | -1.22      | -1.31        | -1.51      | -1.96        |
| SOX4         | SRY (sex determining region Y) | chr6p22.3             | skeletal system development               | ---                                       | -1.17         | -1.14           | -1.04     | -1.02       | 1.01      | 1.08        | -1.13      | -1.07        | -1.44      | -1.59        | -1.75      | -1.53        |
| SOX4         | SRY (sex determining region Y) | chr6p22.3             | skeletal system development               | ---                                       | -1.19         | -1.18           | 1.10      | 1.05        | 1.13      | 1.16        | -1.29      | -1.34        | -1.96      | -1.90        | -1.49      | -1.63        |
| SOX5         | SRY (sex determining region Y) | chr12p12.1            | in utero embryonic development            | ---                                       | 2.15          | 2.29            | -1.63     | 1.08        | 2.92      | 1.94        | 1.92       | -1.99        | 1.38       | -1.44        | -2.50      | -5.22        |
| SOX6         | SRY (sex determining region Y) | chr11p15.3            | negative regulation of transcription from | ---                                       | 1.02          | 3.42            | -1.16     | 2.10        | 4.47      | 1.97        | 1.99       | 1.22         | 2.70       | -1.19        | 1.32       | 2.50         |
| SOX9         | SRY (sex determining region Y) | chr17q23              | skeletal system development               | ---                                       | -1.04         | 1.15            | 1.13      | -1.19       | 1.18      | 1.04        | -1.37      | -1.15        | 1.21       | 1.26         | 2.11       | 1.38         |
| SP100        | SP100 nuclear antigen          | chr2q37.1             | negative regulation of transcription from | ---                                       | 1.35          | 1.19            | 1.03      | -1.19       | 1.09      | 1.18        | -1.05      | 1.05         | -4.53      | -4.75        | -4.17      | -3.23        |
| SP100        | SP100 nuclear antigen          | chr2q37.1             | negative regulation of transcription from | ---                                       | 1.01          | -1.01           | 1.03      | 1.07        | -1.03     | -1.04       | 1.40       | 1.09         | 1.24       | 1.09         | 1.04       | -1.09        |
| SP100        | SP100 nuclear antigen          | chr2q37.1             | negative regulation of transcription from | ---                                       | 1.01          | -1.03           | 1.02      | 1.02        | -1.19     | -1.02       | 1.26       | 1.13         | 1.29       | 1.36         | -1.15      | -1.11        |
| SP100        | SP100 nuclear antigen          | chr2q37.1             | negative regulation of transcription from | ---                                       | -1.11         | -1.31           | -1.12     | -1.01       | 1.14      | -1.02       | 1.14       | 1.27         | -2.42      | -2.55        | -1.70      | -1.69        |
| SP110        | SP110 nuclear body protein     | chr2q37.1             | transcription, DNA-dependent              | ---                                       | -1.09         | -1.08           | 1.02      | 1.02        | 1.03      | -1.09       | 1.20       | 1.09         | -1.05      | 1.23         | 1.26       | 1.11         |
| SP110        | SP110 nuclear body protein     | chr2q37.1             | transcription, DNA-dependent              | ---                                       | 1.07          | 1.04            | 1.02      | -1.05       | -1.19     | -1.19       | -1.12      | -1.25        | 1.07       | 1.11         | 2.34       | 2.12         |
| SP140L       | SP140 nuclear body protein     | chr2q37.1             | 0                                         | ---                                       | -1.03         | 1.03            | -1.03     | -1.16       | 1.05      | 1.07        | -1.17      | -1.07        | -1.55      | -1.51        | -1.26      | -1.30        |
| SP2          | Sp2 transcription factor       | chr17q21.32           | in utero embryonic development            | ---                                       | -1.23         | -1.40           | 1.33      | 1.43        | -1.05     | 1.41        | 1.31       | -1.02        | -1.47      | -2.36        | -1.87      | -1.35        |
| SP4          | Sp4 transcription factor       | chr7p15.3             | transcription, DNA-dependent              | ---                                       | 1.14          | 1.07            | 1.22      | 1.05        | 1.02      | 1.11        | -1.17      | -1.08        | -1.55      | -1.48        | -1.43      | -1.75        |
| SPAG1        | sperm associated antigen 1     | chr8q22.2             | single fertilization                      | ---                                       | 1.29          | 1.29            | -1.12     | -1.16       | -1.13     | -1.04       | -1.03      | -1.13        | -1.95      | -1.65        | -1.18      | -1.50        |
| SPAG11A ///  | sperm associated antigen 11    | chr8p23.1             | defense response                          | ---                                       | 1.73          | 1.74            | 1.23      | 1.96        | 1.32      | 1.36        | -1.24      | -1.11        | 2.16       | 1.46         | -1.05      | -1.09        |
| SPAG16       | sperm associated antigen 16    | chr2q34               | spermatogenesis                           | ---                                       | -1.01         | -1.04           | 1.04      | -1.07       | 1.01      | 1.19        | -1.27      | -1.16        | -1.41      | -1.12        | -1.71      | -1.74        |
| SPAG4        | sperm associated antigen 4     | chr20q11.21           | spermatogenesis                           | ---                                       | -1.04         | -1.34           | 1.07      | 1.14        | 1.04      | 1.04        | 1.19       | 1.05         | 1.71       | 1.75         | 5.31       | 7.33         |
| SPAG5        | sperm associated antigen 5     | chr17q11.2            | mitotic sister chromatid segregation      | ---                                       | -1.07         | -1.02           | 1.04      | 1.08        | 1.07      | 1.04        | 1.00       | -1.03        | 1.52       | 1.44         | 1.62       | 1.79         |
| SPAG5-AS1    | SPAG5 antisense RNA 1          | ---                   | 0                                         | ---                                       | -1.10         | 2.04            | -1.02     | 1.55        | -1.61     | -1.53       | -2.42      | -1.67        | 1.36       | 1.12         | 2.54       | 2.18         |
| SPAG5-AS1    | SPAG5 antisense RNA 1          | ---                   | 0                                         | ---                                       | -1.22         | -1.14           | -1.10     | 1.44        | -1.41     | -1.34       | -1.32      | -1.05        | 1.12       | 1.07         | 2.82       | 2.22         |
| SPAG7        | sperm associated antigen 7     | chr17p13.2            | 0                                         | ---                                       | -1.13         | -1.12           | 1.03      | -1.00       | -1.01     | -1.13       | 1.25       | 1.09         | 1.32       | 1.36         | 1.37       | 1.29         |
| SPAG9        | sperm associated antigen 9     | chr17q21.33           | activation of MAPK activity               | ---                                       | 1.03          | 1.03            | -1.00     | -1.08       | 1.03      | 1.09        | 1.01       | 1.07         | 1.13       | 1.31         | 1.19       | 1.15         |
| SPAM1        | sperm adhesion molecule 1      | chr7q31.3             | carbohydrate metabolic process            | ---                                       | -2.86         | -1.03           | -2.42     | -1.24       | 2.04      | 2.24        | 1.34       | 1.57         | 3.98       | 14.53        | 2.30       | 2.88         |
| SPAM1        | sperm adhesion molecule 1      | chr7q31.3             | carbohydrate metabolic process            | ---                                       | 1.46          | 1.02            | 1.70      | 1.69        | -1.55     | 1.24        | 1.01       | 2.17         | 2.39       | -1.69        | -1.04      | -4.05        |
| SPAST        | spastin                        | chr2p24-p21           | microtubule bundle formation              | ---                                       | 1.09          | 1.02            | -1.04     | -1.18       | -1.13     | 1.16        | -1.40      | -1.28        | -1.54      | -1.20        | -1.37      | -1.48        |
| SPATA12      | spermatogenesis associated     | chr3p14.3             | 0                                         | ---                                       | 1.18          | 1.38            | -1.28     | -1.04       | -1.05     | -1.04       | 1.01       | -1.27        | -1.66      | -1.77        | -6.73      | -3.58        |
| SPATA17      | spermatogenesis associated     | chr1q41               | 0                                         | ---                                       | -1.42         | -1.44           | 1.20      | 1.08        | -1.06     | -1.05       | -1.01      | 1.07         | -2.26      | -1.80        | -1.26      | -1.37        |
| SPATA17      | spermatogenesis associated     | chr1q41               | 0                                         | ---                                       | 1.04          | -1.04           | 1.13      | -1.05       | 1.24      | 1.01        | 1.01       | 1.39         | -1.99      | -1.78        | -1.34      | -1.26        |
| SPATA2       | spermatogenesis associated     | chr20q13.13           | multicellular organismal development      | ---                                       | -1.11         | -1.11           | -1.02     | -1.39       | -1.11     | -1.01       | -1.07      | 1.01         | 1.12       | 1.16         | 1.24       | 1.22         |
| SPATA2L      | spermatogenesis associated     | chr16q24.3            | 0                                         | ---                                       | 1.13          | 1.22            | -1.05     | 1.19        | -1.03     | -1.07       | 1.40       | 1.32         | 1.36       | -1.06        | -1.49      | -1.05        |
| SPATA31C2    | SPATA31 subfamily C, me        | chr9q22.1             | spermatogenesis                           | ---                                       | -2.22         | 1.11            | -4.24     | -1.39       | -7.39     | -2.17       | 1.12       | 1.57         | 4.37       | 1.15         | -14.16     | -2.32        |
| SPATA5       | spermatogenesis associated     | chr4q28.1             | DNA repair                                | ---                                       | -1.06         | 1.20            | 1.17      | 1.26        | 1.02      | -1.14       | 2.08       | 1.26         | 2.21       | 1.66         | 2.68       | 1.59         |
| SPATA5L1     | spermatogenesis associated     | chr15q21.1            | DNA repair                                | ---                                       | -1.02         | 1.03            | -1.04     | 1.01        | 1.06      | -1.02       | -1.16      | -1.06        | 1.09       | 1.11         | 1.45       | 1.19         |
| SPATA5L1     | spermatogenesis associated     | chr15q21.1            | DNA repair                                | ---                                       | 1.02          | -1.02           | 1.04      | 1.05        | 1.04      | -1.01       | -1.01      | -1.12        | 1.04       | 1.06         | 1.37       | 1.12         |
| SPATA5L1     | spermatogenesis associated     | chr15q21.1            | ubiquitin-dependent protein catabolic pr  | ---                                       | -1.02         | -2.88           | -1.00     | -2.16       | 2.93      | 3.02        | -1.65      | 1.04         | 1.71       | -2.29        | -1.36      | 1.15         |
| SPATA6L      | spermatogenesis associated     | chr9p24.2             | 0                                         | ---                                       | -1.60         | -1.07           | 1.10      | 1.51        | 1.29      | 1.49        | 1.46       | -1.30        | -2.61      | -2.93        | -4.40      | -2.52        |
| SPATS2       | spermatogenesis associated     | chr12q13.12           | 0                                         | ---                                       | -1.23         | -1.28           | -1.19     | -1.10       | -1.20     | -1.27       | -1.15      | 1.14         | 1.04       | 1.09         | -1.28      | -1.11        |
| SPATS2L      | spermatogenesis associated     | chr2q33.1             | 0                                         | ---                                       | 1.01          | -1.00           | -1.00     | -1.04       | -1.00     | -1.04       | -1.06      | -1.07        | -1.30      | -1.23        | -1.53      | -1.51        |
| SPC24        | SPC24, NDC80 kinetochore       | chr19p13.2            | M phase of mitotic cell cycle             | ---                                       | 1.06          | 1.02            | -1.04     | 1.02        | -1.07     | -1.03       | -1.12      | 1.15         | -1.20      | -1.06        | -1.49      | -1.21        |
| SPC24        | SPC24, NDC80 kinetochore       | chr19p13.2            | mitotic cell cycle                        | ---                                       | -1.83         | -1.46           | 1.33      | 2.03        | 1.28      | -1.07       | 1.68       | 1.34         | 3.63       | 2.57         | 1.95       | 1.65         |
| SPC25        | SPC25, NDC80 kinetochore       | chr2q31.1             | M phase of mitotic cell cycle             | ---                                       | 1.07          | 1.01            | -1.02     | 1.04        | -1.11     | 1.01        | -1.36      | 1.03         | 1.05       | 1.07         | 1.22       | 1.23         |
| SPCS2        | signal peptidase complex       | chr11q13.4            | energy reserve metabolic process          | ---                                       | -1.04         | -1.03           | 1.04      | -1.07       | 1.05      | 1.02        | -1.08      | 1.01         | -1.02      | -1.04        | 1.24       | 1.34         |
| SPCS2        | signal peptidase complex       | chr11q13.4            | energy reserve metabolic process          | ---                                       | -1.01         | -1.01           | -1.08     | -1.02       | 1.02      | 1.06        | -1.07      | -1.10        | -1.24      | -1.16        | -1.27      | -1.34        |
| SPCS2        | signal peptidase complex       | chr11q13.4            | energy reserve metabolic process          | ---                                       | 1.70          | 1.34            | 1.22      | 1.07        | 1.36      | 1.76        | -1.24      | -1.17        | -1.60      | -1.45        | -2.00      | -2.74        |
| SPCS3        | signal peptidase complex       | chr4q34.2             | energy reserve metabolic process          | ---                                       | 1.20          | 1.19            | -1.01     | -1.19       | 1.00      | -1.10       | -1.15      | -1.19        | -1.44      | -1.23        | -1.13      | -1.33        |
| SPCS3        | signal peptidase complex       | chr4q34.2             | energy reserve metabolic process          | ---                                       | -1.33         | -1.18           | -1.13     | -1.23       | -1.24     | -1.17       | -1.08      | 1.29         | 1.13       | 1.31         | 1.32       | 1.36         |
| SPCS3        | signal peptidase complex       | chr4q34.2             | energy reserve metabolic process          | ---                                       | -1.00         | -1.02           | -1.04     | -1.09       | -1.04     | 1.08        | -1.11      | -1.13        | -1.29      | -1.18        | -1.43      | -1.44        |
| SPDL1        | spindle apparatus coiled-co    | chr5q35.1             | M phase of mitotic cell cycle             | ---                                       | 1.23          | 1.14            | -1.03     | -1.03       | 1.04      | -1.05       | 1.01       | 1.10         | -1.59      | -1.80        | -1.49      | -1.90        |
| SPDYE1 /// S | speedy/RINGO cell cycle re     | chr7p13 /// chr7q11.0 | ---                                       | ---                                       | 1.27          | 1.10            | 1.06      | 1.09        | -1.11     | 1.07        | 1.15       | 1.16         | -2.17      | -2.08        | -1.97      | -1.96        |

| ID      | Gene Title                        | Chromosomal Location | 1st Gene Ontology Biological Process      | Pathway                               | A2497 30 mins | A2497P' 30 mins | A2497 2 h | A2497P' 2 h | A2497 4 h | A2497P' 4 h | A2497 24 h | A2497P' 24 h | A2497 48 h | A2497P' 48 h | A2497 72 h | A2497P' 72 h |
|---------|-----------------------------------|----------------------|-------------------------------------------|---------------------------------------|---------------|-----------------|-----------|-------------|-----------|-------------|------------|--------------|------------|--------------|------------|--------------|
| SPDYE2  | speedy/RINGO cell cycle           | chr7q22.1            | 0                                         | ---                                   | 1.51          | -1.25           | 1.37      | 1.27        | -1.16     | 1.08        | 1.15       | -1.15        | -1.39      | -1.49        | -1.96      | -1.23        |
| SPECC1  | sperm antigen with calponin       | chr17p11.2           | cell adhesion                             | ---                                   | 1.05          | 1.13            | -1.01     | -1.01       | 1.01      | -1.02       | 1.02       | 1.04         | -2.91      | -4.18        | -3.22      | -3.24        |
| SPECC1  | sperm antigen with calponin       | chr17p11.2           | cell adhesion                             | ---                                   | 1.10          | 1.06            | 1.06      | -1.10       | 1.07      | 1.05        | 1.02       | -1.06        | -1.37      | -1.14        | -1.41      | -1.37        |
| SPECC1  | sperm antigen with calponin       | chr17p11.2           | cell adhesion                             | ---                                   | -1.15         | -1.17           | 1.14      | 1.04        | 1.33      | 1.16        | 1.07       | 1.01         | -1.42      | -1.36        | -1.16      | -1.08        |
| SPECC1L | sperm antigen with calponin       | chr22q11.23          | negative regulation of microtubule depol  | ---                                   | -1.23         | -1.09           | -1.06     | -1.24       | -1.07     | -1.09       | -1.27      | 1.01         | -1.34      | -1.20        | -1.36      | -1.11        |
| SPEF2   | sperm flagellar 2                 | chr5p13.2            | immune system development                 | ---                                   | 1.01          | -1.16           | 1.01      | 1.16        | 1.18      | 1.04        | 1.57       | 1.02         | 1.37       | 1.26         | 1.15       | 1.10         |
| SPEM1   | spermatid maturation 1            | chr17p13.1           | multicellular organismal development      | ---                                   | -1.91         | -1.21           | -1.52     | -2.18       | -1.48     | -1.70       | -1.66      | -1.24        | -1.05      | -2.11        | -2.02      | -2.23        |
| SPESP1  | sperm equatorial segment          | chr15q23             | multicellular organismal development      | ---                                   | 1.24          | -1.48           | -3.12     | -2.17       | -1.74     | 1.17        | -1.18      | -1.38        | -1.23      | -1.81        | -1.10      | 1.48         |
| SPG11   | spastic paraplegia 11 (autos)     | chr15q14             | cell death                                | ---                                   | -1.08         | -1.22           | 1.01      | 1.28        | -1.11     | 1.01        | 1.19       | 1.33         | 1.42       | 1.29         | 1.25       | 1.16         |
| SPG11   | spastic paraplegia 11 (autos)     | chr15q14             | cell death                                | ---                                   | -1.06         | -1.04           | 1.03      | 1.06        | 1.12      | 1.19        | 1.00       | 1.11         | -1.67      | -1.40        | -1.72      | -1.62        |
| SPG20   | spastic paraplegia 20 (Troy)      | chr13q13.3           | cytokinesis                               | ---                                   | -1.02         | -1.01           | 1.01      | 1.07        | -1.14     | 1.21        | -1.30      | -1.13        | -1.53      | -1.22        | -1.36      | -1.50        |
| SPG20   | spastic paraplegia 20 (Troy)      | chr13q13.3           | cytokinesis                               | ---                                   | 1.20          | 1.06            | -1.05     | -1.03       | 1.09      | 1.37        | -1.23      | -1.15        | -1.39      | -1.20        | -1.46      | -1.73        |
| SPG21   | spastic paraplegia 21 (autos)     | chr15q21-q22         | cell death                                | ---                                   | 1.16          | 1.28            | -1.09     | -1.12       | -1.10     | -1.11       | -1.14      | -1.08        | -1.32      | -1.06        | -1.04      | -1.45        |
| SPG7    | spastic paraplegia 7 (pure autos) | chr16q24.3           | proteolysis                               | ---                                   | 1.07          | -1.02           | -1.26     | 1.39        | 1.24      | 1.24        | 1.09       | 1.15         | 1.80       | 1.59         | 1.73       | 1.81         |
| SPHK1   | sphingosine kinase 1              | chr17q25.2           | blood vessel development                  | S1P_Signaling // GenMAPP              | -1.29         | -1.43           | -1.28     | -1.21       | -1.05     | -1.11       | 1.24       | 1.29         | 2.72       | 1.59         | 2.65       | 2.15         |
| SPICE1  | spindle and centriole assoc       | chr3q13.2            | cell cycle                                | ---                                   | 1.07          | -1.07           | 1.21      | 1.13        | 1.07      | 1.19        | 1.24       | 1.49         | 1.14       | 1.17         | 1.51       | 1.48         |
| SPICE1  | spindle and centriole assoc       | chr3q13.2            | cell cycle                                | ---                                   | -1.29         | -1.05           | -1.30     | 1.23        | 1.33      | 1.57        | -1.31      | -1.24        | 1.33       | 2.01         | 2.03       | 2.35         |
| SPIN1   | spindlin 1                        | chr9q22.1            | cell cycle                                | ---                                   | 1.08          | 1.12            | -1.04     | -1.08       | -1.15     | -1.05       | -1.09      | -1.03        | -1.15      | -1.04        | -1.18      | -1.31        |
| SPIN3   | spindlin family, member 3         | chrXp11.21           | gamete generation                         | ---                                   | 1.16          | 1.09            | 1.29      | 1.19        | 1.15      | 1.02        | 1.21       | 1.08         | -1.55      | -1.51        | -1.15      | -1.29        |
| SPIN3   | spindlin family, member 3         | chrXp11.21           | gamete generation                         | ---                                   | 1.18          | 1.15            | 1.01      | -1.03       | -1.04     | 1.09        | -1.04      | -1.03        | -1.79      | -1.58        | -1.15      | -1.16        |
| SPIN4   | spindlin family, member 4         | chrXq11.1            | gamete generation                         | ---                                   | 1.06          | 1.08            | 1.02      | -1.12       | -1.21     | 1.09        | -1.40      | -1.09        | -1.54      | -1.36        | -1.63      | -1.68        |
| SPINK13 | serine peptidase inhibitor, 1     | chr5q32              | negative regulation of peptidase activity | ---                                   | 1.04          | 1.06            | -1.08     | -1.09       | -1.06     | 1.00        | -1.08      | -1.03        | 1.31       | 1.25         | 1.26       | 1.22         |
| SPINK2  | serine peptidase inhibitor, 2     | chr4q12              | male germ cell proliferation              | ---                                   | -8.38         | -2.17           | -8.76     | -18.26      | -4.87     | 2.23        | 7.37       | 4.77         | -1.08      | 1.04         | 1.82       | -3.12        |
| SPINK5  | serine peptidase inhibitor, 5     | chr5q32              | proteolysis                               | ---                                   | -1.12         | -1.05           | 1.06      | 1.07        | -1.01     | -1.09       | -1.06      | 1.07         | 1.57       | 1.43         | 1.17       | 1.21         |
| SPINK6  | serine peptidase inhibitor, 6     | chr5q32              | negative regulation of peptidase activity | ---                                   | -1.07         | -1.08           | -1.03     | -1.07       | 1.05      | 1.05        | 1.06       | -1.02        | 1.38       | 1.07         | 1.27       | 1.21         |
| SPINK7  | serine peptidase inhibitor, 7     | chr5q32              | negative regulation of peptidase activity | ---                                   | 1.18          | -1.00           | 1.43      | 1.04        | 1.30      | 1.01        | 1.34       | 1.17         | 5.47       | 5.19         | 9.41       | 7.43         |
| SPINT1  | serine peptidase inhibitor, 1     | chr15q15.1           | embryonic placenta development            | ---                                   | -1.21         | -1.23           | 1.21      | 1.15        | -1.03     | -1.07       | -1.07      | -1.14        | 1.40       | 1.08         | 2.16       | 1.79         |
| SPIRE1  | spire homolog 1 (Drosophila)      | chr18p11.21          | transport                                 | ---                                   | 1.13          | 1.11            | -1.05     | -1.10       | 1.07      | 1.08        | 1.07       | 1.12         | -1.48      | -1.43        | -1.17      | -1.50        |
| SPIRE2  | spire homolog 2 (Drosophila)      | chr16q24             | transport                                 | ---                                   | -1.19         | -1.06           | -1.04     | 1.08        | -1.35     | -1.19       | -1.10      | 1.07         | -2.09      | -1.17        | -5.69      | -3.78        |
| SPOCK3  | sparc/osteonectin, cwcv and       | chr4q32.3            | signal transduction                       | ---                                   | 1.45          | 1.04            | 1.12      | 1.05        | -1.10     | -1.18       | -1.45      | -1.32        | -2.44      | -1.48        | -1.82      | -1.81        |
| SPOPL   | speckle-type POZ protein-1        | chr2q22.1            | protein ubiquitination                    | ---                                   | 1.25          | 1.16            | 1.08      | 1.18        | 1.21      | 1.22        | -1.12      | 1.09         | -1.14      | -1.00        | 1.68       | 1.52         |
| SPP1    | secreted phosphoprotein 1         | chr4q22.1            | osteoblast differentiation                | TGF_Beta_Signaling_Pathway // GenMAPP | -1.18         | -1.03           | 1.47      | 1.28        | -7.37     | 1.01        | -3.78      | -1.45        | 22.28      | 13.30        | 1.05       | -1.33        |
| SPP1    | secreted phosphoprotein 1         | chr4q22.1            | ossification                              | TGF_Beta_Signaling_Pathway // GenMAPP | 1.89          | -1.33           | 4.38      | 5.00        | -2.96     | -1.47       | 2.90       | 18.52        | 9.93       | -4.88        | -3.61      | -3.61        |
| SPPL2B  | signal peptide peptidase like     | chr19p13.3           | proteolysis                               | ---                                   | 1.01          | -1.01           | 1.23      | 1.44        | -1.40     | -1.30       | 1.35       | 1.29         | -1.46      | -1.65        | -1.88      | -1.65        |
| SPPL3   | signal peptide peptidase like     | chr12q24.31          | proteolysis                               | ---                                   | 1.14          | 1.20            | 1.02      | -1.15       | -1.10     | 1.00        | -1.11      | -1.01        | -1.88      | -1.72        | -1.56      | -1.76        |
| SPPL3   | signal peptide peptidase like     | chr12q24.31          | proteolysis                               | ---                                   | 1.07          | -1.18           | 1.12      | -1.12       | 1.18      | 1.09        | -1.07      | -1.08        | -1.74      | -1.70        | -1.24      | -1.14        |
| SPPL3   | signal peptide peptidase like     | chr12q24.31          | proteolysis                               | ---                                   | -1.04         | -1.01           | 1.08      | -1.03       | 1.01      | -1.00       | -1.00      | -1.05        | -1.07      | -1.13        | 1.19       | 1.19         |
| SPRED1  | sprouty-related, EVH1 dom         | chr15q14             | inactivation of MAPK activity             | ---                                   | 1.20          | 1.14            | 1.11      | -1.04       | -1.05     | 1.14        | -1.10      | -1.03        | -1.33      | -1.33        | -1.56      | -2.06        |
| SPRED1  | sprouty-related, EVH1 dom         | chr15q14             | inactivation of MAPK activity             | ---                                   | -1.27         | -1.50           | 1.35      | 1.13        | -1.18     | -1.19       | 1.04       | 1.34         | -1.02      | -1.01        | -1.19      | -1.22        |
| SPRED3  | sprouty-related, EVH1 dom         | chr19q13             | inactivation of MAPK activity             | ---                                   | -1.10         | 1.27            | -1.38     | 1.17        | -1.03     | -1.18       | -1.65      | 1.01         | 1.06       | 1.25         | -1.67      | 1.21         |
| SPRR2C  | small proline-rich protein 2      | chr1q21-q22          | epidermis development                     | ---                                   | -2.22         | -1.00           | -2.14     | -2.42       | -1.37     | -1.02       | -1.38      | 1.94         | 1.23       | 1.41         | -1.55      | -1.37        |
| SPRR3   | small proline-rich protein 3      | chr1q21-q22          | epidermis development                     | ---                                   | 1.59          | 2.23            | -3.32     | -2.91       | -1.28     | -2.01       | 9.24       | 2.53         | 3.66       | 1.53         | -1.04      | 2.39         |
| SPRR4   | small proline-rich protein 4      | chr1q21.3            | peptide cross-linking                     | ---                                   | 1.93          | 3.28            | -2.25     | -1.11       | -1.90     | 1.05        | 2.25       | 2.13         | 1.27       | 1.75         | -1.03      | 2.27         |
| SPRTN   | SprT-like N-terminal domain       | chr14q21.2-q43       | DNA repair                                | ---                                   | -1.00         | 1.07            | -1.03     | 1.02        | 1.06      | 1.02        | -1.33      | -1.19        | -1.34      | -1.59        | -1.24      | -1.50        |
| SPRY2   | sprouty homolog 2 (Drosophila)    | chr13q31.1           | epidermal growth factor receptor signal   | ---                                   | 1.31          | 1.37            | -1.03     | -1.05       | 1.04      | 1.08        | 1.22       | -1.07        | 1.38       | 1.21         | 1.50       | 1.12         |
| SPRY4   | sprouty homolog 4 (Drosophila)    | chr5q31.3            | multicellular organismal development      | ---                                   | -1.22         | -1.40           | -2.08     | -1.70       | -1.89     | -1.05       | 7.91       | 5.87         | 2.96       | 2.12         | 2.00       | -1.39        |
| SPRYD3  | SPRY domain containing 3          | chr12q13.13          | phosphorylation                           | ---                                   | -1.05         | -1.05           | 1.02      | -1.08       | -1.23     | -1.07       | -1.05      | 1.28         | 1.53       | 1.48         | 1.32       | 1.74         |
| SPRYD4  | SPRY domain containing 4          | chr12q13.3           | 0                                         | ---                                   | 1.10          | -1.00           | 1.02      | 1.06        | 1.00      | 1.04        | 1.07       | -1.09        | -1.75      | -1.36        | -1.36      | -1.38        |
| SPSB3   | splA/ryanodine receptor dom       | chr16p13.3           | protein ubiquitination                    | ---                                   | -1.27         | -1.08           | -1.07     | -1.05       | -1.03     | -1.08       | 1.03       | 1.04         | 1.17       | -1.05        | 1.32       | 1.30         |
| SPSB3   | splA/ryanodine receptor dom       | chr16p13.3           | protein ubiquitination                    | ---                                   | -1.05         | 1.05            | -1.27     | 1.10        | -1.09     | -1.11       | 1.13       | -1.00        | -1.41      | -1.70        | 1.31       | 1.33         |
| SPTAN1  | spectrin, alpha, non-erythro      | chr9q34.11           | apoptotic process                         | ---                                   | -1.05         | -1.11           | 1.03      | 1.23        | 1.01      | -1.07       | 1.13       | 1.12         | -1.17      | -1.54        | -1.24      | -1.04        |
| SPTAN1  | spectrin, alpha, non-erythro      | chr9q34.11           | apoptotic process                         | ---                                   | 1.05          | 1.03            | 1.02      | 1.18        | -1.02     | -1.03       | 1.10       | 1.17         | -1.21      | -1.54        | -1.27      | -1.14        |
| SPTAN1  | spectrin, alpha, non-erythro      | chr9q34.11           | apoptotic process                         | ---                                   | 2.70          | 2.29            | -1.69     | -1.53       | -1.18     | -1.25       | 1.24       | -1.36        | -1.22      | -1.22        | 4.00       | 5.88         |
| SPTB    | spectrin, beta, erythrocytic      | chr14q23-q24.2       | porphyrin-containing compound biosynt     | ---                                   | -1.22         | -5.25           | -1.19     | 1.09        | -1.34     | 1.27        | -1.05      | -1.01        | -1.00      | 1.46         | -1.49      | -1.39        |
| SPTBN1  | spectrin, beta, non-erythro       | chr2p21              | mitotic cytokinesis                       | ---                                   | -1.06         | -1.19           | 1.06      | 1.02        | -1.16     | -1.28       | -1.33      | -1.31        | -1.62      | -1.39        | -1.45      | -2.31        |
| SPTBN1  | spectrin, beta, non-erythro       | chr2p21              | mitotic cytokinesis                       | ---                                   | -1.17         | -1.08           | 1.12      | 1.09        | 1.13      | 1.09        | 1.00       | -1.18        | 1.05       | 1.16         | -1.64      | -1.49        |
| SPTBN1  | spectrin, beta, non-erythro       | chr2p21              | mitotic cytokinesis                       | ---                                   | -1.51         | -1.59           | 1.12      | 1.06        | 1.02      | -1.33       | 2.14       | 2.61         | 3.70       | 1.60         | 1.93       | 1.49         |
| SPTBN1  | spectrin, beta, non-erythro       | chr2p21              | mitotic cytokinesis                       | ---                                   | -1.07         | 1.01            | -1.14     | -1.01       | -1.08     | -1.02       | -1.03      | -1.00        | 1.10       | 1.14         | -1.05      | -1.06        |
| SPTLC1  | serine palmitoyltransferase       | chr9q22.2            | lipid metabolic process                   | ---                                   | -1.12         | -1.09           | 1.06      | -1.01       | 1.29      | 1.19        | -1.04      | -1.07        | 1.21       | 1.12         | 1.28       | 1.31         |
| SPTLC1  | serine palmitoyltransferase       | chr9q22.2            | lipid metabolic process                   | ---                                   | 1.05          | 1.09            | -1.14     | 1.01        | -1.18     | -1.11       | 1.00       | -1.19        | 1.09       | 1.02         | 1.75       | 1.57         |
| SPTLC2  | serine palmitoyltransferase       | chr14q24.3           | lipid metabolic process                   | ---                                   | -1.00         | -1.06           | 1.08      | -1.12       | 1.03      | -1.09       | 1.16       | -1.01        | 1.09       | -1.39        | 1.37       | 1.23         |
| SPTLC2  | serine palmitoyltransferase       | chr14q24.3           | lipid metabolic process                   | ---                                   | -1.02         | -1.09           | 1.11      | 1.12        | -1.04     | -1.20       | 1.04       | 1.01         | 1.28       | 1.08         | 1.31       | 1.25         |
| SPTY2D1 | SPT2, Suppressor of Ty, do        | chr11p15.1           | 0                                         | ---                                   | -1.02         | -1.02           | 1.07      | -1.18       | 1.10      | 1.22        | -1.10      | 1.01         | 1.64       | 1.72         | 2.35       | 1.93         |
| SPTY2D1 | SPT2, Suppressor of Ty, do        | chr11p15.1           | 0                                         | ---                                   | -1.02         | -1.01           | -1.05     | -1.07       | -1.06     | -1.01       | -1.18      | 1.05         | 1.18       | 1.34         | 1.50       | 1.58         |
| SQLE    | squalene epoxidase                | chr8q24.1            | cholesterol biosynthetic process          | Cholesterol_Biosynthesis // GenMAPP   | 1.02          | 1.13            | -1.04     | -1.10       | -1.04     | -1.08       | -1.09      | -1.10        | 1.58       | 1.54         | 2.42       | 2.23         |
| SQLE    | squalene epoxidase                | chr8q24.1            | cholesterol biosynthetic process          | Cholesterol_Biosynthesis // GenMAPP   | -1.07         | -1.08           | -1.38     | -1.11       | -1.37     | 1.27        | 1.06       | -1.83        | 1.02       | 1.22         | 1.84       | 2.27         |

| ID           | Gene Title                                  | Chromosomal Location | 1st Gene Ontology Biological Process                                 | Pathway                             | A2497 30 mins | A2497P' 30 mins | A2497 2 h | A2497P' 2 h | A2497 4 h | A2497P' 4 h | A2497 24 h | A2497P' 24 h | A2497 48 h | A2497P' 48 h | A2497 72 h | A2497P' 72 h |
|--------------|---------------------------------------------|----------------------|----------------------------------------------------------------------|-------------------------------------|---------------|-----------------|-----------|-------------|-----------|-------------|------------|--------------|------------|--------------|------------|--------------|
| SQLE         | squalene epoxidase                          | chr8q24.1            | cholesterol biosynthetic process                                     | Cholesterol_Biosynthesis // GenMAPP | 1.34          | 1.31            | 1.08      | -1.06       | -1.15     | -1.20       | -1.13      | -1.13        | 1.63       | 1.51         | 3.88       | 3.50         |
| SQLE         | squalene epoxidase                          | chr8q24.1            | cholesterol biosynthetic process                                     | Cholesterol_Biosynthesis // GenMAPP | -1.16         | -1.12           | -1.05     | -1.26       | 1.11      | 1.01        | -1.01      | 1.04         | 1.82       | 1.84         | 3.25       | 3.57         |
| SQRDL        | sulfide quinone reductase                   | chr15q15             | sulfur amino acid metabolic process                                  | ---                                 | -1.06         | -1.11           | -1.06     | -1.02       | 1.12      | 1.01        | 1.61       | 1.34         | 3.11       | 2.19         | 2.82       | 2.81         |
| SQSTM1       | sequestosome 1                              | chr5q35              | positive regulation of protein phosphorylation                       | ---                                 | -1.05         | -1.04           | 1.08      | -1.05       | -1.03     | 1.07        | 1.10       | 1.03         | -1.06      | -1.32        | -1.28      | -1.86        |
| SQSTM1       | sequestosome 1                              | chr5q35              | positive regulation of protein phosphorylation                       | ---                                 | 1.05          | -1.02           | -1.06     | 1.04        | -1.00     | 1.02        | -1.18      | -1.15        | -1.05      | -1.25        | 1.28       | 1.14         |
| SRA1         | steroid receptor RNA activator              | chr5q31.3            | transcription, DNA-dependent                                         | ---                                 | -1.02         | -1.07           | -1.11     | 1.01        | -1.04     | -1.01       | 1.02       | 1.08         | 1.56       | 1.60         | 1.50       | 1.68         |
| SRA1         | steroid receptor RNA activator              | chr5q31.3            | transcription, DNA-dependent                                         | ---                                 | -1.09         | -1.12           | -1.05     | 1.00        | 1.04      | -1.03       | 1.11       | 1.04         | 2.09       | 1.70         | 1.62       | 1.78         |
| SRBD1        | S1 RNA binding domain 1                     | chr2p21              | nucleobase-containing compound metabolism                            | ---                                 | 1.25          | 1.19            | 1.04      | -1.10       | -1.20     | 1.02        | -1.42      | -1.26        | -1.46      | -1.38        | -1.57      | -1.97        |
| SRCIN1       | SRC kinase signaling inhibitor              | chr17q12             | exocytosis                                                           | ---                                 | 1.68          | -1.24           | -1.02     | -1.36       | -2.40     | -1.97       | -1.29      | -6.72        | -1.03      | -2.56        | 4.46       | 4.41         |
| SRD5A1       | steroid-5-alpha-reductase                   | chr5p15              | urogenital system development                                        | ---                                 | 1.01          | 1.04            | -1.16     | -1.16       | -1.14     | -1.11       | -1.23      | -1.11        | -1.72      | -1.49        | -1.33      | -1.51        |
| SRD5A1       | steroid-5-alpha-reductase                   | chr5p15              | urogenital system development                                        | ---                                 | 1.27          | 1.07            | -1.08     | -1.12       | -1.14     | -1.02       | -1.01      | -1.09        | -1.58      | -1.33        | -1.60      | -1.51        |
| SRD5A1       | steroid-5-alpha-reductase                   | chr5p15              | urogenital system development                                        | ---                                 | 1.07          | 1.07            | -1.10     | -1.09       | -1.10     | 1.06        | -1.15      | -1.11        | -1.40      | -1.12        | -1.40      | -1.46        |
| SRD5A2       | steroid-5-alpha-reductase                   | chr2p23              | lipid metabolic process                                              | ---                                 | -1.24         | -1.69           | 1.55      | 2.78        | 1.13      | 1.25        | -1.17      | 1.01         | 2.46       | 1.52         | 1.61       | -1.09        |
| SRD5A3       | steroid 5 alpha-reductase 3                 | chr4q12              | protein glycosylation                                                | ---                                 | 1.00          | -1.05           | 1.27      | 1.23        | -1.10     | 1.13        | -1.24      | -1.20        | -1.52      | -1.01        | -2.19      | -1.99        |
| SREBF1       | sterol regulatory element binding protein 1 | chr17p11.2           | negative regulation of transcription from RNA polymerase II promoter | ---                                 | 1.12          | -1.04           | -1.06     | 1.20        | -1.02     | 1.00        | 1.07       | 1.12         | -1.75      | -1.88        | -1.90      | -1.84        |
| SREBF1       | sterol regulatory element binding protein 1 | chr17p11.2           | negative regulation of transcription from RNA polymerase II promoter | ---                                 | 1.30          | 1.31            | -1.01     | -1.40       | -1.09     | -1.06       | -1.23      | -1.02        | -2.98      | -4.03        | -3.55      | -7.59        |
| SREBF2       | sterol regulatory element binding protein 2 | chr22q13             | negative regulation of transcription from RNA polymerase II promoter | ---                                 | 1.06          | -1.05           | 1.03      | 1.13        | 1.01      | 1.06        | -1.09      | -1.07        | 1.20       | 1.33         | 1.18       | 1.57         |
| SREBF2       | sterol regulatory element binding protein 2 | chr22q13             | negative regulation of transcription from RNA polymerase II promoter | ---                                 | -1.03         | -1.13           | 1.04      | -1.09       | 1.03      | -1.11       | 1.06       | 1.09         | 1.33       | 1.27         | 1.29       | 1.44         |
| SREK1        | splicing regulatory glutamine-rich protein  | chr5q12.3            | mRNA processing                                                      | mRNA_processing_Reactome // GenMAPP | 1.07          | 1.09            | 1.08      | 1.07        | -1.07     | 1.07        | -1.27      | -1.10        | -1.85      | -1.42        | -1.37      | -1.40        |
| SREK1        | splicing regulatory glutamine-rich protein  | chr5q12.3            | mRNA processing                                                      | mRNA_processing_Reactome // GenMAPP | 1.68          | 1.61            | -1.00     | -1.12       | -1.07     | 1.15        | 1.06       | -1.07        | -1.89      | -1.65        | -2.26      | -2.23        |
| SREK1IP1     | SREK1-interacting protein                   | chr5q12.3            | mRNA processing                                                      | ---                                 | 1.10          | 1.12            | -1.04     | -1.00       | -1.11     | -1.08       | -1.01      | 1.15         | 1.27       | 1.10         | 1.11       | 1.01         |
| SREK1IP1     | SREK1-interacting protein                   | chr5q12.3            | mRNA processing                                                      | ---                                 | 1.18          | 1.09            | -1.14     | -1.11       | -1.17     | -1.04       | -1.21      | -1.05        | -1.20      | -1.19        | -1.50      | -1.51        |
| SRF          | serum response factor (c-fos)               | chr6p21.1            | patterning of blood vessels                                          | ---                                 | -1.04         | -1.07           | -1.11     | -1.19       | -1.06     | -1.11       | 1.24       | 1.01         | -1.09      | 1.11         | 1.28       | 1.26         |
| SRGAP1       | SLIT-ROBO Rho GTPase activator 1            | chr12q14.2           | fucose metabolic process                                             | ---                                 | 1.00          | 1.16            | 1.15      | 1.10        | 1.02      | 1.22        | 1.21       | 1.06         | -1.01      | -1.26        | 1.47       | 1.15         |
| SRGAP1       | SLIT-ROBO Rho GTPase activator 1            | chr12q14.2           | fucose metabolic process                                             | ---                                 | 1.09          | -1.10           | 1.05      | -1.48       | -1.27     | -1.03       | 2.07       | 1.69         | 1.24       | -1.04        | 1.59       | 1.51         |
| SRGAP2 /// S | SLIT-ROBO Rho GTPase activator 2            | chr1q32.1            | lamellipodium assembly involved in angiogenesis                      | ---                                 | 1.20          | -1.02           | 1.21      | 1.32        | 1.37      | 1.04        | 1.19       | 1.16         | 1.62       | 1.72         | 2.13       | 1.93         |
| SRGAP2 /// S | SLIT-ROBO Rho GTPase activator 2            | chr1q32.1            | lamellipodium assembly involved in angiogenesis                      | ---                                 | -1.03         | 1.07            | 1.09      | 1.08        | 1.20      | -1.02       | 1.07       | -1.13        | -1.21      | -1.50        | -1.30      | -1.24        |
| SRGN         | serglycin                                   | chr10q22.1           | platelet degranulation                                               | ---                                 | -1.00         | 1.11            | 1.05      | -1.12       | -1.66     | 1.16        | 1.20       | -1.27        | 1.23       | 1.28         | 1.39       | 1.27         |
| SRI          | sortilin                                    | chr7q21.1            | regulation of action potential                                       | ---                                 | 1.07          | 1.05            | 1.11      | 1.11        | 1.16      | 1.04        | -1.14      | -1.14        | -1.58      | -1.44        | -2.00      | -1.91        |
| SRMP1 /// SR | spermidine synthase pseudogene              | ---                  | ---                                                                  | ---                                 | 1.96          | 4.62            | 1.79      | 3.83        | 1.05      | -1.31       | -1.12      | -2.28        | 1.01       | 1.26         | 7.90       | 6.71         |
| SRP14        | signal recognition particle                 | chr15q22             | translation                                                          | ---                                 | -1.04         | 1.02            | -1.04     | -1.01       | -1.08     | -1.03       | 1.05       | -1.02        | 1.14       | 1.11         | -1.06      | -1.03        |
| SRP19        | signal recognition particle                 | chr5q21-q22          | translation                                                          | ---                                 | 1.02          | 1.07            | -1.02     | -1.02       | -1.03     | -1.00       | -1.07      | 1.01         | 1.03       | -1.01        | 1.27       | 1.15         |
| SRP54        | signal recognition particle                 | chr14q13.2           | GTP catabolic process                                                | ---                                 | 1.15          | 1.16            | -1.01     | -1.13       | -1.04     | 1.02        | -1.16      | -1.07        | 1.07       | 1.18         | 1.46       | 1.34         |
| SRP68        | signal recognition particle                 | chr17q25.1           | translation                                                          | ---                                 | -1.03         | -1.03           | 1.00      | 1.02        | 1.05      | 1.01        | 1.09       | 1.06         | 1.35       | 1.27         | 1.24       | 1.28         |
| SRP72        | signal recognition particle                 | chr4q11              | translation                                                          | ---                                 | 1.02          | -1.04           | -1.02     | -1.06       | -1.13     | 1.03        | 1.02       | 1.05         | -1.03      | 1.24         | 1.27       | 1.30         |
| SRP72        | signal recognition particle                 | chr4q11              | translation                                                          | ---                                 | 1.03          | 1.01            | 1.00      | 1.07        | -1.00     | 1.02        | 1.11       | -1.03        | 1.14       | 1.10         | 1.14       | 1.15         |
| SRP72        | signal recognition particle                 | chr4q11              | translation                                                          | ---                                 | -1.21         | -1.16           | 1.03      | 1.12        | 1.23      | 1.09        | 1.39       | 1.20         | 1.63       | 1.45         | 2.03       | 2.15         |
| SRP72        | signal recognition particle                 | chr4q11              | translation                                                          | ---                                 | -1.02         | -1.01           | 1.03      | -1.06       | 1.03      | -1.02       | 1.11       | 1.02         | 1.33       | 1.16         | 1.31       | 1.26         |
| SRPK1        | SRSF protein kinase 1                       | chr6p21.31           | mRNA processing                                                      | mRNA_processing_Reactome // GenMAPP | 1.08          | 1.09            | -1.13     | -1.10       | -1.16     | 1.02        | -1.08      | -1.07        | -1.20      | -1.01        | -1.16      | -1.25        |
| SRPK2        | SRSF protein kinase 2                       | chr7q22-q31.1        | spliceosomal complex assembly                                        | mRNA_processing_Reactome // GenMAPP | -1.16         | 1.10            | -1.10     | 1.16        | -1.06     | 1.19        | 1.08       | -1.02        | 1.29       | 1.15         | 1.34       | 1.05         |
| SRPK2        | SRSF protein kinase 2                       | chr7q22-q31.1        | spliceosomal complex assembly                                        | mRNA_processing_Reactome // GenMAPP | -1.12         | -1.15           | -1.00     | -1.14       | 1.10      | -1.07       | 1.22       | 1.04         | 1.25       | 1.17         | 1.21       | 1.39         |
| SRPK2        | SRSF protein kinase 2                       | chr7q22-q31.1        | spliceosomal complex assembly                                        | mRNA_processing_Reactome // GenMAPP | 1.12          | -1.14           | 1.06      | 1.22        | -1.05     | -1.05       | -1.23      | -1.15        | 1.78       | 1.52         | 1.16       | 1.29         |
| SRPK2        | SRSF protein kinase 2                       | chr7q22-q31.1        | spliceosomal complex assembly                                        | mRNA_processing_Reactome // GenMAPP | 1.14          | 1.12            | 1.08      | -1.08       | -1.14     | 1.06        | -1.05      | 1.17         | -1.01      | 1.18         | 1.46       | 1.34         |
| SRPR         | signal recognition particle                 | chr11q24.2           | GTP catabolic process                                                | ---                                 | 1.23          | -1.07           | 1.08      | -1.12       | -1.02     | 1.02        | 2.08       | 1.19         | 1.52       | 1.48         | 1.97       | 1.34         |
| SRPR         | signal recognition particle                 | chr11q24.2           | GTP catabolic process                                                | ---                                 | -1.04         | -1.04           | -1.04     | -1.00       | 1.03      | 1.05        | 1.03       | -1.02        | 1.53       | 1.53         | 1.45       | 1.58         |
| SRPRB        | signal recognition particle                 | chr3q22.1            | translation                                                          | ---                                 | -1.02         | 1.03            | -1.09     | 1.01        | -1.07     | -1.06       | -1.04      | -1.03        | 1.01       | 1.01         | 1.07       | 1.17         |
| SRPRB        | signal recognition particle                 | chr3q22.1            | translation                                                          | ---                                 | -1.05         | -1.03           | 1.12      | -1.02       | 1.06      | -1.09       | 1.10       | -1.01        | 1.55       | 1.25         | 1.62       | 1.63         |
| SRPX2        | sushi-repeat containing protein             | chrXq21.33-q23       | angiogenesis                                                         | ---                                 | 1.26          | 1.33            | 1.04      | 1.12        | 1.00      | -1.50       | 1.20       | 1.23         | 1.07       | -1.18        | -2.55      | -1.84        |
| SRR          | serine racemase                             | chr17p13             | cellular amino acid metabolic process                                | ---                                 | -1.03         | -1.07           | -1.04     | -1.04       | -1.04     | 1.01        | 1.02       | 1.05         | 1.14       | 1.35         | 1.41       | 1.61         |
| SRR          | serine racemase                             | chr17p13             | L-serine metabolic process                                           | ---                                 | -1.05         | 1.03            | -1.01     | -1.06       | -1.08     | 1.01        | 1.08       | 1.05         | 1.06       | 1.02         | 1.61       | 1.58         |
| SRRD         | SRR1 domain containing                      | chr22q12.1           | rhythmic process                                                     | ---                                 | 1.02          | -1.07           | -1.02     | 1.12        | 1.09      | 1.02        | 1.02       | 1.20         | 1.07       | -1.04        | 1.22       | 1.45         |
| SRRM1        | serine/arginine repetitive motif protein    | chr1p36.11           | mRNA splicing, via transesterification reaction                      | mRNA_processing_Reactome // GenMAPP | 1.10          | 1.14            | -1.07     | -1.12       | -1.14     | -1.02       | -1.17      | -1.13        | -1.01      | -1.01        | -1.25      | -1.56        |
| SRRM2        | serine/arginine repetitive motif protein    | chr1p13.3            | mRNA splicing, via spliceosome                                       | ---                                 | -1.03         | -1.15           | 1.12      | 1.07        | 1.19      | 1.14        | 1.07       | -1.04        | 1.17       | 1.01         | 1.85       | 1.68         |
| SRRM4        | serine/arginine repetitive motif protein    | chr12q24.23          | mRNA processing                                                      | ---                                 | 2.57          | 2.60            | 7.91      | 4.82        | -1.59     | 1.60        | 1.39       | 1.96         | -38.00     | -18.53       | -4.31      | -14.94       |
| SRRM4        | serine/arginine repetitive motif protein    | chr12q24.23          | mRNA processing                                                      | ---                                 | -1.11         | -1.32           | 1.32      | -1.10       | 1.00      | 1.41        | -1.09      | 1.02         | -1.56      | -1.41        | -2.20      | -1.89        |
| SRRT         | serrate RNA effector molecule               | chr7q21              | transcription, DNA-dependent                                         | ---                                 | -1.12         | -1.01           | 1.21      | -1.06       | 1.05      | -1.18       | -1.24      | -1.26        | -1.75      | -1.80        | -1.20      | -1.13        |
| SRRT         | serrate RNA effector molecule               | chr7q21              | transcription, DNA-dependent                                         | ---                                 | -1.09         | -1.08           | -1.02     | 1.03        | -1.04     | -1.06       | -1.08      | 1.03         | -1.16      | -1.40        | -1.17      | -1.16        |
| SRRT         | serrate RNA effector molecule               | chr7q21              | transcription, DNA-dependent                                         | ---                                 | -1.00         | 1.07            | 1.14      | -1.17       | 1.12      | -1.04       | -1.11      | -1.11        | -1.38      | -1.51        | -1.25      | -1.63        |
| SRRT         | serrate RNA effector molecule               | chr7q21              | transcription, DNA-dependent                                         | ---                                 | -1.05         | -1.05           | -1.02     | 1.04        | -1.03     | -1.05       | -1.08      | 1.12         | -1.22      | -1.38        | -1.27      | -1.22        |
| SRSF1        | serine/arginine-rich splicing factor        | chr17q22             | mRNA 5'-splice site recognition                                      | ---                                 | -1.20         | -1.20           | 1.28      | -1.20       | -1.23     | 1.13        | -1.37      | -1.27        | -1.39      | -1.91        | -2.25      | -4.54        |
| SRSF1        | serine/arginine-rich splicing factor        | chr17q22             | mRNA 5'-splice site recognition                                      | ---                                 | -1.07         | 1.00            | -1.05     | -1.02       | 1.02      | -1.05       | 1.10       | 1.02         | 1.13       | -1.16        | -1.05      | -1.10        |
| SRSF1        | serine/arginine-rich splicing factor        | chr17q22             | mRNA 5'-splice site recognition                                      | ---                                 | -1.07         | -1.03           | -1.09     | -1.07       | -1.10     | -1.01       | -1.16      | -1.12        | -1.70      | -1.60        | -1.50      | -1.62        |
| SRSF1        | serine/arginine-rich splicing factor        | chr17q22             | mRNA 5'-splice site recognition                                      | ---                                 | 1.09          | 1.19            | 1.04      | -1.03       | -1.01     | 1.05        | -1.42      | -1.17        | -2.27      | -2.85        | -2.33      | -2.76        |
| SRSF11       | serine/arginine-rich splicing factor        | chr1p31              | mRNA splicing, via spliceosome                                       | ---                                 | -1.63         | -2.38           | 1.25      | 1.38        | -1.12     | 1.62        | 1.84       | 3.01         | 2.29       | 1.98         | 2.44       | 2.44         |
| SRSF11       | serine/arginine-rich splicing factor        | chr1p31              | mRNA splicing, via spliceosome                                       | ---                                 | 1.06          | 1.04            | 1.01      | 1.10        | 1.03      | 1.26        | -1.01      | -1.09        | -1.89      | -1.69        | -2.27      | -2.46        |
| SRSF11       | serine/arginine-rich splicing factor        | chr1p31              | mRNA splicing, via spliceosome                                       | ---                                 | 1.30          | 1.20            | -1.00     | 1.18        | -1.14     | 1.20        | -1.79      | -1.40        | 1.02       | 1.28         | 1.02       | 1.08         |

| ID           | Gene Title                      | Chromosomal Location | 1st Gene Ontology Biological Process           | Pathway                                  | A2497 30 mins | A2497P' 30 mins | A2497 2 h | A2497P' 2 h | A2497 4 h | A2497P' 4 h | A2497 24 h | A2497P' 24 h | A2497 48 h | A2497P' 48 h | A2497 72 h | A2497P' 72 h |
|--------------|---------------------------------|----------------------|------------------------------------------------|------------------------------------------|---------------|-----------------|-----------|-------------|-----------|-------------|------------|--------------|------------|--------------|------------|--------------|
| SRSF12       | serine/arginine-rich splicing   | chr6q15              | assembly of spliceosomal tri-snRNP             | ---                                      | 2.18          | 2.26            | 1.50      | 2.90        | -2.17     | -2.13       | 1.12       | 5.36         | 1.92       | 4.08         | 2.73       | 4.92         |
| SRSF3        | serine/arginine-rich splicing   | chr6p21              | mRNA splicing, via spliceosome                 | ---                                      | -1.06         | -1.01           | 1.01      | -1.05       | 1.01      | -1.02       | -1.13      | -1.10        | -1.37      | -1.53        | -1.27      | -1.55        |
| SRSF3        | serine/arginine-rich splicing   | chr6p21              | mRNA splicing, via spliceosome                 | ---                                      | -1.00         | 1.08            | -1.07     | -1.07       | -1.07     | -1.08       | -1.07      | -1.10        | -1.14      | -1.30        | -1.19      | -1.41        |
| SRSF3        | serine/arginine-rich splicing   | chr6p21              | mRNA splicing, via spliceosome                 | ---                                      | 1.66          | 1.44            | -1.03     | -1.18       | 1.10      | 1.02        | -1.19      | -1.64        | -2.55      | -1.36        | -1.26      | -1.52        |
| SRSF3        | serine/arginine-rich splicing   | chr6p21              | mRNA splicing, via spliceosome                 | ---                                      | -1.09         | -1.14           | -1.01     | -1.04       | 1.08      | -1.02       | -1.54      | -1.08        | -1.96      | -2.03        | -1.76      | -1.83        |
| SRSF3        | serine/arginine-rich splicing   | chr6p21              | mRNA splicing, via spliceosome                 | ---                                      | 1.03          | 1.02            | -1.07     | -1.04       | -1.01     | 1.07        | -1.26      | -1.14        | -2.31      | -2.00        | -2.08      | -2.32        |
| SRSF4        | serine/arginine-rich splicing   | chr1p35.3            | RNA splicing, via transesterification reaction | mRNA_processing_Reactome // GenMAPP      | 1.22          | 1.09            | 1.07      | 1.06        | 1.29      | 1.26        | -1.25      | -1.22        | -2.02      | -1.96        | -1.99      | -1.44        |
| SRSF5        | serine/arginine-rich splicing   | chr14q24             | mRNA splicing, via spliceosome                 | mRNA_processing_Reactome // GenMAPP      | 1.02          | 1.03            | -1.05     | -1.01       | 1.06      | -1.01       | 1.09       | 1.04         | -1.27      | -1.30        | -1.44      | -1.29        |
| SRSF5        | serine/arginine-rich splicing   | chr14q24             | mRNA splicing, via spliceosome                 | mRNA_processing_Reactome // GenMAPP      | 1.07          | 1.06            | 1.04      | 1.08        | 1.23      | 1.07        | 1.20       | -1.01        | -1.10      | -1.29        | -1.41      | -1.34        |
| SRSF6        | serine/arginine-rich splicing   | chr20q12-q13.1       | mRNA splicing, via spliceosome                 | mRNA_processing_Reactome // GenMAPP      | -1.02         | 1.01            | -1.00     | 1.02        | 1.03      | 1.04        | -1.37      | -1.23        | -1.42      | -1.63        | -1.52      | -1.52        |
| SRSF7        | serine/arginine-rich splicing   | chr2p22.1            | mRNA splicing, via spliceosome                 | mRNA_processing_Reactome // GenMAPP      | -1.05         | -1.02           | -1.01     | -1.01       | 1.07      | -1.10       | -1.05      | -1.07        | 1.34       | 1.13         | -1.04      | 1.04         |
| SRSF7        | serine/arginine-rich splicing   | chr2p22.1            | mRNA splicing, via spliceosome                 | mRNA_processing_Reactome // GenMAPP      | -1.14         | -1.13           | 1.31      | 1.13        | 1.16      | 1.16        | 1.30       | 1.05         | -1.68      | -1.84        | -1.16      | -1.18        |
| SRSF7        | serine/arginine-rich splicing   | chr2p22.1            | mRNA splicing, via spliceosome                 | mRNA_processing_Reactome // GenMAPP      | -1.02         | -1.00           | -1.03     | 1.02        | 1.05      | 1.03        | -1.22      | -1.19        | -1.35      | -1.18        | -1.62      | -1.55        |
| SRSF8        | serine/arginine-rich splicing   | chr11q22             | mRNA processing                                | ---                                      | -1.09         | -1.25           | 1.01      | -1.14       | 1.03      | 1.08        | -1.49      | -1.14        | -3.49      | -2.99        | -3.28      | -2.67        |
| SRSF8        | serine/arginine-rich splicing   | chr11q22             | mRNA processing                                | ---                                      | 1.44          | 1.34            | 1.04      | -1.20       | 1.03      | 1.14        | -1.31      | -1.09        | -1.80      | -1.84        | -1.44      | -1.78        |
| SRSF8        | serine/arginine-rich splicing   | chr11q22             | mRNA processing                                | ---                                      | 1.18          | 1.25            | 1.01      | -1.14       | -1.09     | 1.01        | -1.32      | -1.06        | -1.84      | -1.80        | -1.66      | -1.92        |
| SRSF8        | serine/arginine-rich splicing   | chr11q22             | mRNA processing                                | ---                                      | 1.28          | 1.15            | 1.05      | -1.05       | 1.09      | 1.01        | -1.31      | -1.20        | -3.13      | -3.45        | -3.13      | -3.56        |
| SRXN1        | sulfiredoxin 1                  | chr20p13             | response to oxidative stress                   | ---                                      | 1.08          | 1.05            | 1.04      | 1.09        | 1.16      | 1.13        | -1.07      | -1.14        | 1.41       | 1.27         | 1.35       | 1.37         |
| SS18         | synovial sarcoma translocation  | chr18q11.2           | microtubule cytoskeleton organization          | ---                                      | 1.01          | -1.07           | 1.04      | -1.01       | 1.01      | 1.07        | 1.13       | 1.18         | -1.74      | -1.91        | -1.56      | -1.80        |
| SS18         | synovial sarcoma translocation  | chr18q11.2           | microtubule cytoskeleton organization          | ---                                      | -1.46         | -1.38           | -1.02     | 1.09        | -1.05     | -1.14       | -1.10      | 1.06         | -1.43      | -1.34        | 1.18       | 1.02         |
| SS18L1       | synovial sarcoma translocation  | chr20q13.3           | transcription, DNA-dependent                   | ---                                      | 1.13          | 1.17            | -1.05     | -1.10       | -1.06     | -1.02       | -1.19      | -1.17        | -1.41      | -1.47        | -1.12      | -1.30        |
| SS18L2       | synovial sarcoma translocation  | chr3p21              | 0                                              | ---                                      | -1.04         | -1.07           | -1.02     | -1.11       | 1.02      | 1.00        | -1.15      | -1.16        | 1.00       | -1.03        | -1.08      | -1.12        |
| SSB          | Sjogren syndrome antigen 1      | chr2q31.1            | RNA processing                                 | ---                                      | -1.10         | -1.08           | -1.02     | 1.06        | -1.02     | -1.06       | 1.02       | 1.24         | 1.03       | -1.12        | -1.07      | -1.07        |
| SSB          | Sjogren syndrome antigen 1      | chr2q31.1            | RNA processing                                 | ---                                      | -1.00         | -1.02           | 1.00      | 1.08        | 1.05      | 1.03        | 1.04       | 1.08         | 1.11       | -1.07        | -1.11      | -1.13        |
| SSBP1        | single-stranded DNA binding     | chr7q34              | DNA replication                                | ---                                      | -1.02         | 1.01            | -1.02     | 1.05        | -1.04     | -1.04       | 1.06       | 1.03         | -1.00      | -1.01        | -1.60      | -1.43        |
| SSBP1        | single-stranded DNA binding     | chr7q34              | DNA replication                                | ---                                      | 1.08          | -1.19           | -1.17     | -1.02       | -1.94     | -1.13       | -1.01      | 1.60         | -1.04      | -1.05        | -1.55      | -1.72        |
| SSBP1        | single-stranded DNA binding     | chr7q34              | DNA replication                                | ---                                      | 1.05          | -1.87           | 1.09      | -1.20       | 1.92      | 1.98        | 1.50       | 1.25         | 2.23       | 2.50         | 2.14       | 2.73         |
| SSBP2        | single-stranded DNA binding     | chr5q14.1            | regulation of transcription, DNA-dependent     | ---                                      | 1.12          | 1.11            | -1.11     | -1.04       | -1.22     | -1.13       | -1.32      | -1.09        | -1.81      | -1.24        | -1.71      | -1.51        |
| SSBP2        | single-stranded DNA binding     | chr5q14.1            | regulation of transcription, DNA-dependent     | ---                                      | 1.20          | 1.07            | -1.10     | -1.49       | -1.32     | 1.15        | -1.82      | -1.09        | -1.33      | -1.04        | -2.31      | -2.07        |
| SSBP2        | single-stranded DNA binding     | chr5q14.1            | regulation of transcription, DNA-dependent     | ---                                      | 1.22          | -1.08           | -1.05     | -1.34       | 1.19      | 1.57        | -1.69      | -1.29        | -2.91      | -1.68        | -3.56      | -3.84        |
| SSBP2        | single-stranded DNA binding     | chr5q14.1            | regulation of transcription, DNA-dependent     | ---                                      | 1.08          | 1.20            | 1.13      | 1.04        | 1.38      | 1.18        | -1.08      | -1.08        | -1.87      | -1.51        | -1.73      | -1.60        |
| SSBP3        | single stranded DNA binding     | chr1p32.3            | transcription, DNA-dependent                   | ---                                      | -1.01         | -1.02           | 1.07      | 1.03        | 1.16      | 1.06        | 1.01       | -1.11        | -1.10      | 1.04         | -1.31      | -1.15        |
| SSBP3        | single stranded DNA binding     | chr1p32.3            | transcription, DNA-dependent                   | ---                                      | -1.02         | -1.00           | -1.04     | -1.00       | -1.06     | -1.10       | -1.16      | -1.11        | -1.81      | -1.31        | -2.13      | -2.01        |
| SSBP3        | single stranded DNA binding     | chr1p32.3            | transcription, DNA-dependent                   | ---                                      | -1.03         | 1.02            | 1.10      | 1.09        | 1.13      | 1.08        | 1.12       | -1.03        | -1.24      | 1.06         | -1.26      | -1.21        |
| SSBP4        | single stranded DNA binding     | chr19p13.1           | 0                                              | ---                                      | 1.12          | 1.09            | 1.09      | 1.35        | -1.29     | -1.33       | 1.19       | 1.11         | 1.01       | -1.17        | -1.39      | -1.21        |
| SSBP4        | single stranded DNA binding     | chr19p13.1           | 0                                              | ---                                      | 1.32          | 1.11            | 1.07      | 1.25        | -1.12     | -1.04       | 1.09       | 1.06         | 1.15       | 1.01         | -1.41      | -1.19        |
| SSFA2        | sperm specific antigen 2        | chr2q31.3            | 0                                              | ---                                      | 1.02          | 1.02            | -1.04     | 1.02        | 1.02      | 1.01        | 1.11       | -1.00        | 1.40       | 1.21         | -1.07      | -1.43        |
| SSH1         | slingshot protein phosphatase   | chr12q24.11          | cell morphogenesis                             | ---                                      | -1.26         | -1.27           | -1.40     | -1.21       | 1.21      | 1.18        | 1.62       | 1.13         | 3.02       | 3.18         | 2.73       | 2.22         |
| SSH1         | slingshot protein phosphatase   | chr12q24.11          | cell morphogenesis                             | ---                                      | 1.01          | 1.15            | 1.18      | 1.06        | 1.01      | 1.09        | 1.40       | -1.03        | 1.32       | 1.33         | 1.75       | 1.69         |
| SSH2         | slingshot protein phosphatase   | chr17q11.2           | protein dephosphorylation                      | ---                                      | 1.82          | 1.38            | 1.11      | 1.14        | -1.50     | 1.11        | -1.45      | 1.12         | 1.35       | 1.15         | 1.26       | 1.92         |
| SSH2         | slingshot protein phosphatase   | chr17q11.2           | protein dephosphorylation                      | ---                                      | 1.02          | -1.09           | -1.15     | 1.23        | -1.23     | -1.09       | 1.24       | -1.01        | 1.22       | 1.10         | 1.66       | 2.48         |
| SSH2         | slingshot protein phosphatase   | chr17q11.2           | protein dephosphorylation                      | ---                                      | 2.09          | 1.06            | -2.28     | 1.11        | -1.09     | -1.78       | -1.30      | 1.71         | -1.64      | 1.39         | 5.11       | 3.35         |
| SSPN         | sarcomeres                      | chr12p11.2           | muscle contraction                             | ---                                      | 1.35          | -1.97           | -1.33     | -3.92       | 1.57      | -1.50       | -1.22      | 1.07         | 1.90       | 2.01         | 1.32       | -1.12        |
| SSPN         | sarcomeres                      | chr12p11.2           | muscle contraction                             | ---                                      | -1.07         | 1.47            | 2.17      | -2.05       | 1.64      | 1.99        | -2.33      | -2.47        | 5.52       | 5.42         | 1.47       | -1.45        |
| SSR1         | signal sequence receptor, alpha | chr6p24.3            | translation                                    | ---                                      | 1.05          | 1.03            | 1.04      | -1.01       | 1.01      | 1.06        | -1.19      | -1.20        | 1.22       | 1.37         | 1.42       | 1.69         |
| SSR1         | signal sequence receptor, alpha | chr6p24.3            | translation                                    | ---                                      | -1.03         | 1.10            | -1.03     | -1.01       | -1.13     | 1.17        | -1.24      | -1.04        | -1.08      | 1.22         | 1.39       | 1.57         |
| SSR1         | signal sequence receptor, alpha | chr6p24.3            | translation                                    | ---                                      | -1.03         | 1.02            | 1.07      | -1.02       | 1.08      | 1.06        | -1.03      | -1.07        | 1.69       | 1.69         | 2.00       | 1.86         |
| SSR1         | signal sequence receptor, alpha | chr6p24.3            | translation                                    | ---                                      | 1.08          | 1.11            | -1.01     | -1.06       | -1.06     | -1.04       | -1.09      | -1.10        | 1.14       | 1.28         | 1.81       | 1.66         |
| SSR2         | signal sequence receptor, beta  | chr1q21-q23          | translation                                    | ---                                      | -1.06         | -1.01           | -1.03     | 1.01        | -1.02     | -1.10       | 1.12       | 1.07         | 1.60       | 1.18         | 1.31       | 1.30         |
| SSR3         | signal sequence receptor, gamma | chr3q25.31           | translation                                    | ---                                      | 1.14          | 1.11            | 1.00      | -1.08       | -1.03     | 1.05        | -1.13      | -1.15        | 1.38       | 1.35         | 1.67       | 1.50         |
| SSR3         | signal sequence receptor, gamma | chr3q25.31           | translation                                    | ---                                      | 1.00          | -1.11           | -1.08     | 1.11        | 1.01      | -1.05       | -1.14      | -1.07        | 1.25       | 1.22         | 1.28       | 1.49         |
| SSR3         | signal sequence receptor, gamma | chr3q25.31           | translation                                    | ---                                      | -1.06         | -1.02           | 1.07      | 1.03        | 1.05      | -1.02       | 1.18       | -1.04        | 1.34       | 1.25         | 1.52       | 1.58         |
| SSR4P1       | signal sequence receptor, delta | chr21q22.3           | 0                                              | ---                                      | -1.35         | -1.68           | 1.14      | -1.02       | 1.04      | -1.07       | 1.30       | -1.04        | -3.17      | -2.87        | -3.02      | -2.85        |
| SSRP1        | structure specific recognition  | chr11q12             | DNA replication                                | ---                                      | -1.08         | -1.09           | 1.04      | 1.11        | -1.10     | -1.03       | -1.05      | 1.05         | 1.11       | -1.11        | -1.30      | -1.15        |
| SSSCA1       | Sjogren syndrome/scleroderma    | chr11q13.1           | protein dephosphorylation                      | ---                                      | -1.06         | -1.08           | -1.08     | -1.00       | -1.09     | -1.05       | 1.21       | 1.16         | 1.54       | 1.37         | 1.33       | 1.17         |
| SSTR1        | somatostatin receptor 1         | chr14q13             | signal transduction                            | GPCRDB_Class_A_Rhodopsin-like // GenMAPP | 1.10          | 1.06            | -1.02     | -1.12       | -1.05     | 1.07        | -1.31      | -1.17        | 1.22       | 1.24         | 2.29       | 1.83         |
| SSTR2        | somatostatin receptor 2         | chr17q24             | regulation of muscle contraction               | GPCRDB_Class_A_Rhodopsin-like // GenMAPP | 1.72          | -1.06           | -4.62     | -1.91       | 2.15      | -1.23       | 1.43       | -1.56        | -2.35      | -1.75        | -1.60      | 1.38         |
| SSTR4        | somatostatin receptor 4         | chr20p11.2           | signal transduction                            | GPCRDB_Class_A_Rhodopsin-like // GenMAPP | 1.37          | 1.21            | 1.34      | 1.41        | -1.20     | -1.12       | 3.12       | 1.94         | 1.28       | 1.07         | 2.29       | 1.13         |
| SSU72        | SSU72 RNA polymerase II         | chr1p36.33           | mRNA polyadenylation                           | ---                                      | -1.12         | -1.13           | -1.02     | 1.12        | 1.32      | 1.14        | 1.21       | -1.05        | 1.41       | 1.06         | 1.32       | 1.47         |
| SSU72        | SSU72 RNA polymerase II         | chr1p36.33           | mRNA polyadenylation                           | ---                                      | 1.08          | -1.03           | 1.16      | 1.14        | 1.08      | 1.07        | 1.13       | 1.26         | -1.80      | -2.21        | -3.16      | -2.40        |
| SSX2         | synovial sarcoma, X breakpoint  | chrXp11.22           | transcription, DNA-dependent                   | ---                                      | -4.74         | -1.30           | -1.06     | -1.86       | -1.19     | 1.04        | 1.22       | -1.36        | -1.05      | -1.29        | -1.01      | -2.43        |
| SSX2 /// SSX | synovial sarcoma, X breakpoint  | chrXp11.22           | microtubule cytoskeleton organization          | ---                                      | 1.24          | -1.08           | 1.33      | 1.71        | -3.98     | 1.00        | -1.69      | 1.24         | -1.26      | -1.92        | -1.12      | 1.10         |
| SSX2IP       | synovial sarcoma, X breakpoint  | chr1p22.3            | cell adhesion                                  | ---                                      | 1.10          | 1.40            | 1.20      | -1.16       | 1.10      | 1.06        | 1.24       | -1.05        | 1.21       | 1.08         | 1.11       | -1.04        |
| SSX2IP       | synovial sarcoma, X breakpoint  | chr1p22.3            | cell adhesion                                  | ---                                      | -1.05         | -1.03           | -1.00     | -1.05       | 1.03      | 1.03        | -1.18      | -1.01        | -1.48      | -1.22        | -1.38      | -1.40        |
| SSX2IP       | synovial sarcoma, X breakpoint  | chr1p22.3            | cell adhesion                                  | ---                                      | -1.01         | 1.07            | 1.06      | 1.08        | 1.02      | 1.13        | -1.17      | -1.06        | -1.34      | -1.25        | -1.50      | -1.68        |
| SSX2IP       | synovial sarcoma, X breakpoint  | chr1p22.3            | cell adhesion                                  | ---                                      | 1.04          | 1.03            | 1.02      | 1.09        | 1.28      | 1.09        | -1.19      | -1.19        | -1.10      | -1.00        | -1.59      | -1.55        |

| ID            | Gene Title                   | Chromosomal Location  | 1st Gene Ontology Biological Process      | Pathway                              | A2497 30 mins | A2497P' 30 mins | A2497 2 h | A2497P' 2 h | A2497 4 h | A2497P' 4 h | A2497 24 h | A2497P' 24 h | A2497 48 h | A2497P' 48 h | A2497 72 h | A2497P' 72 h |
|---------------|------------------------------|-----------------------|-------------------------------------------|--------------------------------------|---------------|-----------------|-----------|-------------|-----------|-------------|------------|--------------|------------|--------------|------------|--------------|
| SSX4 /// SSX  | synovial sarcoma, X break    | chrXp11.23            | transcription, DNA-dependent              | ---                                  | -1.65         | -1.40           | -2.49     | 1.81        | -1.84     | -5.63       | 1.06       | 3.41         | -1.50      | -2.04        | 4.62       | 3.70         |
| ST13          | suppression of tumorigenic   | chr22q13.2            | protein folding                           | ---                                  | 1.09          | 1.12            | -1.07     | -1.06       | -1.06     | -1.01       | -1.15      | -1.20        | -1.38      | -1.19        | -1.34      | -1.51        |
| ST13          | suppression of tumorigenic   | chr22q13.2            | protein folding                           | ---                                  | -1.02         | 1.05            | -1.03     | -1.05       | -1.06     | -1.04       | -1.15      | -1.04        | -1.19      | 1.00         | -1.26      | -1.27        |
| ST14          | suppression of tumorigenic   | chr11q24-q25          | proteolysis                               | ---                                  | 1.05          | -1.12           | 1.03      | 1.33        | -1.07     | 1.08        | 1.53       | 1.34         | 1.13       | 1.62         | 1.12       | 1.46         |
| ST18          | suppression of tumorigenic   | chr8q11.23            | negative regulation of transcription from | ---                                  | 1.39          | 1.22            | -1.42     | -1.45       | -1.55     | -1.26       | -1.52      | -1.05        | -1.81      | -1.28        | -3.70      | -3.61        |
| ST20          | suppressor of tumorigenic    | chr15q25.1            | regulation of apoptotic process           | ---                                  | 1.30          | 1.62            | 1.41      | 1.08        | -1.04     | 1.13        | -1.22      | -1.38        | -3.38      | -2.53        | -1.42      | -1.43        |
| ST3GAL1       | ST3 beta-galactoside alpha-  | chr8q24.22            | carbohydrate metabolic process            | ---                                  | -1.18         | 1.00            | -1.02     | -1.15       | 1.01      | 1.01        | 1.12       | 1.01         | 1.44       | 1.40         | 1.82       | 1.55         |
| ST3GAL1       | ST3 beta-galactoside alpha-  | chr8q24.22            | carbohydrate metabolic process            | ---                                  | 1.11          | 1.40            | 1.20      | 1.13        | 1.10      | 1.19        | 1.76       | 1.37         | 1.60       | 1.41         | 2.48       | 1.76         |
| ST3GAL1       | ST3 beta-galactoside alpha-  | chr8q24.22            | carbohydrate metabolic process            | ---                                  | -1.15         | -1.25           | 1.08      | -1.01       | 1.04      | 1.00        | 1.12       | 1.07         | 1.86       | 1.58         | 1.30       | 1.22         |
| ST3GAL3       | ST3 beta-galactoside alpha-  | chr1p34.1             | carbohydrate metabolic process            | ---                                  | -1.06         | -1.13           | 1.03      | 1.15        | 1.08      | 1.08        | 1.04       | -1.00        | 1.10       | 1.14         | 1.10       | 1.27         |
| ST3GAL3       | ST3 beta-galactoside alpha-  | chr1p34.1             | carbohydrate metabolic process            | ---                                  | -1.08         | -1.24           | -1.31     | -1.45       | 1.01      | 1.16        | 1.22       | 1.11         | -1.01      | 1.02         | 1.20       | 1.20         |
| ST3GAL4       | ST3 beta-galactoside alpha-  | chr11q24.2            | carbohydrate metabolic process            | ---                                  | 1.03          | -1.08           | 1.12      | 1.21        | 1.06      | 1.07        | 1.27       | 1.24         | 1.86       | 1.40         | 1.37       | 1.31         |
| ST3GAL4-AS    | ST3GAL4 antisense RNA        | chr11q24.2            | 0                                         | ---                                  | -1.18         | -1.04           | -1.11     | -1.02       | 1.41      | -1.12       | 1.58       | 1.43         | 1.95       | 1.51         | 1.54       | 1.57         |
| ST3GAL5       | ST3 beta-galactoside alpha-  | chr2p11.2             | ganglioside biosynthetic process          | ---                                  | 1.38          | 1.27            | 1.07      | 1.08        | 1.21      | 1.07        | 1.16       | 1.09         | 1.25       | 1.09         | -1.33      | -1.80        |
| ST3GAL6       | ST3 beta-galactoside alpha-  | chr3q12.1             | carbohydrate metabolic process            | ---                                  | -1.03         | -1.08           | 1.01      | -1.27       | 1.12      | 1.08        | 1.21       | 1.18         | 3.30       | 2.55         | 2.59       | 2.23         |
| ST3GAL6       | ST3 beta-galactoside alpha-  | chr3q12.1             | carbohydrate metabolic process            | ---                                  | -1.27         | -1.25           | 1.23      | 1.16        | -1.05     | 1.06        | 1.04       | 1.17         | -2.03      | -1.76        | -1.38      | -1.46        |
| ST6GAL1       | ST6 beta-galactosamide al    | chr3q27-q28           | cellular protein modification process     | ---                                  | 1.70          | 1.38            | -2.85     | -2.57       | -2.91     | -1.96       | 1.03       | 1.76         | -2.58      | -2.04        | -1.32      | -1.81        |
| ST6GAL1       | ST6 beta-galactosamide al    | chr3q27-q28           | cellular protein modification process     | ---                                  | 1.04          | 1.02            | 1.08      | 1.04        | 1.14      | 1.06        | -1.12      | -1.12        | -1.35      | -1.20        | -1.26      | -1.23        |
| ST6GALNAC     | ST6 (alpha-N-acetyl-neural   | chr17q24.2            | protein glycosylation                     | ---                                  | -1.02         | -1.12           | 1.02      | 1.08        | 1.21      | 1.34        | -1.24      | -1.28        | -1.56      | -1.06        | 1.23       | 1.19         |
| ST6GALNAC     | ST6 (alpha-N-acetyl-neural   | chr9q34               | protein glycosylation                     | ---                                  | -1.27         | -1.09           | -1.16     | -1.03       | 1.37      | 1.10        | 1.27       | 1.29         | 1.14       | 1.09         | 1.11       | 1.16         |
| ST6GALNAC     | ST6 (alpha-N-acetyl-neural   | chr9q34               | protein glycosylation                     | ---                                  | -1.08         | -1.13           | 1.09      | -1.05       | 1.19      | -1.00       | 1.05       | -1.28        | 1.17       | 1.15         | 1.11       | -1.02        |
| ST6GALNAC     | ST6 (alpha-N-acetyl-neural   | chr9q34               | protein glycosylation                     | ---                                  | -1.17         | -1.64           | -1.17     | -1.33       | -1.09     | 1.02        | 1.20       | -1.15        | 1.50       | 1.46         | -1.05      | 1.18         |
| ST6GALNAC     | ST6 (alpha-N-acetyl-neural   | chr1p31.1             | protein glycosylation                     | ---                                  | -1.41         | -1.09           | 1.19      | -2.36       | -1.84     | -1.21       | 1.69       | 2.51         | 1.46       | -1.01        | -1.82      | -2.79        |
| ST6GALNAC     | ST6 (alpha-N-acetyl-neural   | chr9q34.11            | ganglioside biosynthetic process          | ---                                  | -1.10         | -1.22           | 1.07      | -1.01       | -1.12     | -1.18       | -1.06      | 1.06         | -1.33      | -1.27        | -1.27      | -1.29        |
| ST7 /// ST7-C | suppression of tumorigenic   | chr7q31.2 /// chr7q30 | 0                                         | ---                                  | -1.11         | -1.04           | 1.11      | 1.30        | -1.09     | 1.00        | 1.06       | -1.08        | -1.39      | -1.32        | -1.46      | -1.29        |
| ST7-AS1       | ST7 antisense RNA 1          | chr7q31.2             | 0                                         | ---                                  | 1.14          | 1.16            | 1.02      | -1.05       | -1.37     | -1.01       | -1.14      | -1.02        | -1.33      | -1.39        | -2.37      | -2.22        |
| ST7L          | suppression of tumorigenic   | chr1p13.2             | negative regulation of cell growth        | ---                                  | -1.05         | -1.18           | 1.11      | 1.31        | -1.01     | -1.16       | 1.28       | 1.13         | -2.20      | -2.45        | -1.48      | -1.55        |
| ST7L          | suppression of tumorigenic   | chr1p13.2             | negative regulation of cell growth        | ---                                  | -1.10         | -1.09           | 1.01      | 1.24        | -1.05     | -1.13       | 1.33       | 1.35         | 1.76       | 1.59         | -1.76      | 1.84         |
| ST7L          | suppression of tumorigenic   | chr1p13.2             | negative regulation of cell growth        | ---                                  | -1.16         | -1.16           | 1.07      | -1.01       | 1.09      | 1.21        | -1.04      | -1.04        | -2.27      | -2.72        | -1.56      | -1.70        |
| ST7L          | suppression of tumorigenic   | chr1p13.2             | negative regulation of cell growth        | ---                                  | -1.13         | -1.18           | 1.07      | 1.12        | 1.65      | 1.22        | -1.05      | 1.03         | -3.18      | -2.31        | -1.99      | -2.00        |
| ST7L          | suppression of tumorigenic   | chr1p13.2             | negative regulation of cell growth        | ---                                  | 1.17          | 1.30            | 1.00      | 1.13        | -1.10     | -1.02       | 1.17       | 1.29         | -2.55      | -1.67        | -2.08      | -1.71        |
| ST8SIA3       | ST8 alpha-N-acetyl-neuran    | chr18q21.31           | ganglioside biosynthetic process          | ---                                  | 5.59          | 9.46            | 1.27      | 1.98        | -5.22     | -3.87       | -1.01      | 1.10         | -1.02      | 1.09         | -5.06      | 1.08         |
| ST8SIA4       | ST8 alpha-N-acetyl-neuran    | chr5q21               | ganglioside biosynthetic process          | ---                                  | 1.07          | -1.01           | -1.03     | 1.05        | -1.02     | 1.44        | -1.44      | -1.12        | -3.18      | -2.23        | -2.95      | -3.25        |
| ST8SIA4       | ST8 alpha-N-acetyl-neuran    | chr5q21               | ganglioside biosynthetic process          | ---                                  | 1.10          | 1.04            | 1.06      | 1.20        | -1.07     | 1.03        | -1.25      | -1.15        | -1.86      | -1.51        | -2.02      | -1.80        |
| ST8SIA4       | ST8 alpha-N-acetyl-neuran    | chr5q21               | ganglioside biosynthetic process          | ---                                  | 1.33          | 1.24            | 1.07      | -1.05       | -1.08     | -1.03       | -1.54      | -1.17        | -2.81      | -2.10        | -2.35      | -3.57        |
| STAC          | SH3 and cysteine rich dom    | chr3p22.3             | signal transduction                       | ---                                  | -1.09         | -1.10           | 1.01      | 1.02        | -1.06     | -1.06       | 1.02       | 1.12         | 1.14       | 1.34         | 1.10       | 1.39         |
| STAC2         | SH3 and cysteine rich dom    | chr17q12              | intracellular signal transduction         | ---                                  | -1.19         | -1.14           | 1.04      | 1.12        | 1.10      | 1.33        | 1.44       | 1.02         | 1.76       | 1.79         | -1.13      | 1.10         |
| STAG1         | stromal antigen 1            | chr3q22.3             | M phase of mitotic cell cycle             | ---                                  | 1.06          | 1.07            | 1.08      | 1.13        | 1.07      | 1.03        | 1.08       | -1.06        | -1.41      | -1.63        | -1.30      | -1.23        |
| STAG1         | stromal antigen 1            | chr3q22.3             | M phase of mitotic cell cycle             | ---                                  | -1.02         | 1.01            | 1.04      | -1.02       | 1.06      | 1.03        | -1.09      | -1.18        | -2.00      | -2.00        | -1.88      | -1.88        |
| STAG3L1 ///   | stromal antigen 3-like 1 /// | chr7q11.23            | 0                                         | ---                                  | -1.03         | -1.13           | -1.17     | 1.07        | -1.03     | 1.19        | 1.04       | 1.09         | -2.27      | -2.95        | -1.83      | -2.07        |
| STAG3L4       | stromal antigen 3-like 4     | chr7p11.2-q11.2       | 0                                         | ---                                  | -1.23         | -1.14           | -1.01     | -1.03       | 1.08      | -1.03       | 1.15       | 1.14         | 1.16       | 1.12         | 1.06       | 1.20         |
| STAM2         | signal transducing adaptor   | chr2q23.3             | transport                                 | ---                                  | 1.11          | 1.02            | 1.18      | -1.02       | -1.48     | -1.34       | -1.07      | -1.24        | -1.46      | -1.83        | -1.47      | -2.21        |
| STAM2         | signal transducing adaptor   | chr2q23.3             | transport                                 | ---                                  | 1.07          | 1.05            | -1.10     | -1.10       | -1.01     | -1.07       | 1.06       | 1.01         | 1.60       | 1.59         | 1.32       | 1.55         |
| STAM2         | signal transducing adaptor   | chr2q23.3             | transport                                 | ---                                  | 1.18          | 1.18            | 1.21      | 1.13        | 1.05      | -1.13       | 1.04       | 1.10         | 1.47       | 1.81         | 1.65       | 1.43         |
| STAM2         | signal transducing adaptor   | chr2q23.3             | transport                                 | ---                                  | -1.12         | -1.07           | 1.16      | 1.02        | 1.04      | 1.17        | -1.18      | 1.03         | -1.55      | -1.30        | -1.30      | -1.27        |
| STAMPB        | STAM binding protein         | chr2p13.1             | mitotic cytokinesis                       | ---                                  | 1.06          | 1.04            | -1.02     | 1.04        | -1.01     | 1.21        | -1.08      | -1.02        | -2.02      | -2.58        | -1.79      | -1.42        |
| STAMBPL1      | STAM binding protein-like    | chr10q23.31           | proteolysis                               | ---                                  | 1.11          | 1.02            | 1.02      | 1.01        | -1.00     | 1.01        | 1.31       | 1.17         | 1.35       | 1.15         | 1.27       | 1.15         |
| STAMBPL1      | STAM binding protein-like    | chr10q23.31           | proteolysis                               | ---                                  | 1.10          | 1.05            | 1.06      | -1.02       | 1.04      | 1.01        | 1.33       | 1.21         | 1.29       | 1.10         | 1.33       | 1.25         |
| STAP2         | signal transducing adaptor   | chr19p13.3            | 0                                         | ---                                  | -1.09         | 1.02            | -1.03     | 1.18        | 1.08      | 1.14        | 1.32       | 1.08         | 1.78       | 1.72         | 1.15       | 1.27         |
| STARD10       | StAR-related lipid transfer  | chr11q13              | transport                                 | ---                                  | 1.01          | 1.11            | -1.12     | 1.08        | 1.43      | 1.02        | 1.04       | 1.02         | 1.93       | 1.31         | 1.71       | 1.67         |
| STARD10       | StAR-related lipid transfer  | chr11q13              | transport                                 | ---                                  | 1.28          | -1.16           | -1.02     | 1.17        | -1.16     | 1.05        | -1.14      | -1.16        | 1.56       | -1.00        | 1.91       | 1.42         |
| STARD13       | StAR-related lipid transfer  | chr13q12-q13          | signal transduction                       | ---                                  | -1.15         | -1.11           | 1.01      | -1.15       | -1.08     | 1.04        | -1.16      | -1.10        | -2.22      | -2.06        | -1.36      | -1.60        |
| STARD13       | StAR-related lipid transfer  | chr13q12-q13          | signal transduction                       | ---                                  | 1.67          | 1.39            | 1.05      | -1.01       | -1.47     | -1.39       | 1.15       | -1.30        | 1.71       | 1.47         | 1.45       | 1.66         |
| STARD13-AS    | STARD13 antisense RNA        | ---                   | 0                                         | ---                                  | -1.32         | 1.23            | -1.28     | 1.13        | 1.15      | 1.12        | 1.39       | 1.20         | 1.27       | -1.41        | 3.76       | 4.45         |
| STARD7        | StAR-related lipid transfer  | chr2q11.2             | 0                                         | ---                                  | -1.13         | -1.04           | -1.03     | 1.01        | -1.03     | -1.03       | 1.08       | -1.01        | -1.07      | -1.16        | -1.18      | -1.17        |
| STARD8        | StAR-related lipid transfer  | chrXq13.1             | signal transduction                       | ---                                  | 1.22          | 1.18            | -1.33     | -1.22       | -1.10     | -1.61       | -1.30      | -1.11        | -1.08      | 1.19         | 1.12       | 1.14         |
| STARD9        | StAR-related lipid transfer  | chr15q15.2            | microtubule-based movement                | ---                                  | 1.12          | -1.09           | 1.11      | 1.28        | 1.03      | 1.02        | -1.22      | -1.18        | -1.67      | -1.61        | -1.11      | -1.05        |
| STAT1         | signal transducer and activ  | chr2q32.2             | negative regulation of transcription from | ---                                  | -1.21         | -1.19           | -1.15     | -1.19       | 1.15      | 1.06        | 1.47       | 1.37         | 1.71       | 1.45         | 1.49       | 1.27         |
| STAT2         | signal transducer and activ  | chr12q13.3            | transcription, DNA-dependent              | ---                                  | -1.08         | -1.07           | -1.29     | -1.17       | -1.01     | -1.13       | 1.12       | 1.11         | -1.17      | -1.20        | -1.14      | 1.09         |
| STAT3         | signal transducer and activ  | chr17q21.31           | negative regulation of transcription from | TGF_Beta_Signaling_Pathway // GenMAP | 1.64          | 1.54            | -1.71     | -1.12       | 1.43      | 1.01        | -1.50      | -1.58        | 4.64       | 1.80         | 3.99       | 3.01         |
| STAT3         | signal transducer and activ  | chr17q21.31           | negative regulation of transcription from | TGF_Beta_Signaling_Pathway // GenMAP | 1.01          | -1.01           | 1.10      | -1.13       | 1.15      | 1.02        | 1.06       | -1.03        | 1.46       | 1.52         | 1.31       | 1.24         |
| STAT5A        | signal transducer and activ  | chr17q11.2            | allantoin metabolic process               | ---                                  | -1.10         | -1.01           | 1.14      | 1.04        | -1.04     | -1.11       | 1.33       | 1.17         | 1.41       | 1.30         | 1.34       | 1.54         |
| STAT5B        | signal transducer and activ  | chr17q11.2            | allantoin metabolic process               | ---                                  | 1.29          | -1.06           | -1.13     | -1.06       | 1.09      | -1.24       | 1.88       | 1.52         | 1.27       | 1.33         | 1.06       | 1.15         |
| STAT6         | signal transducer and activ  | chr12q13              | negative regulation of transcription from | ---                                  | 1.04          | -1.03           | 1.04      | 1.15        | 1.13      | 1.05        | 1.26       | 1.24         | -1.22      | -1.23        | -1.28      | -1.17        |
| STAT6         | signal transducer and activ  | chr12q13              | negative regulation of transcription from | ---                                  | -1.01         | -1.05           | -1.11     | 1.08        | -1.10     | -1.11       | 1.08       | 1.08         | -1.14      | -1.30        | -1.33      | -1.22        |
| STAU1         | staufen double-stranded RN   | chr20q13.1            | intracellular mRNA localization           | ---                                  | -1.01         | 1.06            | -1.06     | -1.00       | -1.05     | 1.03        | 1.02       | -1.02        | -1.06      | 1.02         | -1.07      | -1.14        |

| ID     | Gene Title                                         | Chromosomal Location | 1st Gene Ontology Biological Process                                 | Pathway                      | A2497 30 mins | A2497P' 30 mins | A2497 2 h | A2497P' 2 h | A2497 4 h | A2497P' 4 h | A2497 24 h | A2497P' 24 h | A2497 48 h | A2497P' 48 h | A2497 72 h | A2497P' 72 h |
|--------|----------------------------------------------------|----------------------|----------------------------------------------------------------------|------------------------------|---------------|-----------------|-----------|-------------|-----------|-------------|------------|--------------|------------|--------------|------------|--------------|
| STAU1  | staufen double-stranded RNA binding protein 1      | chr20q13.1           | intracellular mRNA localization                                      | ---                          | 1.09          | 1.12            | -1.00     | 1.01        | 1.01      | -1.13       | 1.10       | 1.01         | 1.03       | 1.02         | -1.11      | -1.18        |
| STAU1  | staufen double-stranded RNA binding protein 1      | chr20q13.1           | intracellular mRNA localization                                      | ---                          | -1.04         | 1.01            | -1.06     | -1.07       | -1.01     | -1.08       | 1.08       | 1.02         | 1.07       | -1.01        | 1.05       | 1.06         |
| STAU2  | staufen double-stranded RNA binding protein 2      | chr8q21.11           | transport                                                            | ---                          | -1.03         | -1.06           | 1.02      | 1.07        | 1.02      | 1.03        | -1.16      | 1.03         | -1.95      | -1.96        | -2.39      | -1.75        |
| STAU2  | staufen double-stranded RNA binding protein 2      | chr8q21.11           | transport                                                            | ---                          | 1.51          | 1.23            | 1.52      | 1.82        | -1.17     | -1.16       | -1.39      | -1.61        | -1.01      | 1.41         | 1.08       | 1.73         |
| STAU2  | staufen double-stranded RNA binding protein 2      | chr8q21.11           | transport                                                            | ---                          | 1.23          | 1.17            | -1.07     | -1.11       | 1.03      | 1.07        | 1.05       | -1.00        | -1.33      | -1.31        | -1.27      | -1.56        |
| STBD1  | starch binding domain 1                            | chr4q21.1            | muscle contraction                                                   | Circadian_Eercise // GenMAPP | -1.24         | -1.35           | -1.29     | 1.54        | 1.64      | 2.08        | 1.48       | 1.57         | 6.52       | 4.86         | -1.00      | 1.59         |
| STC1   | stannocalcin 1                                     | chr8p21-p11.2        | ossification                                                         | ---                          | -1.74         | -1.82           | 1.12      | 1.11        | 1.33      | 1.23        | 1.50       | 1.19         | 3.78       | 3.57         | 8.73       | 11.89        |
| STC1   | stannocalcin 1                                     | chr8p21-p11.2        | ossification                                                         | ---                          | 1.17          | 1.94            | 1.17      | 1.61        | 2.03      | 1.36        | -1.81      | 1.42         | 2.98       | 3.14         | 2.35       | 1.49         |
| STC1   | stannocalcin 1                                     | chr8p21-p11.2        | ossification                                                         | ---                          | 1.18          | 1.06            | 1.22      | -1.09       | -1.19     | -1.16       | 1.02       | 1.09         | 2.37       | 2.57         | 5.63       | 5.42         |
| STC2   | stannocalcin 2                                     | chr5q35.1            | cellular calcium ion homeostasis                                     | ---                          | -1.27         | -1.14           | -1.17     | -1.19       | -1.13     | -1.13       | 1.05       | 1.22         | 1.25       | 1.36         | 1.40       | 1.62         |
| STC2   | stannocalcin 2                                     | chr5q35.1            | cellular calcium ion homeostasis                                     | ---                          | 1.08          | -1.17           | 1.18      | -1.13       | 1.12      | 1.34        | 1.49       | 1.28         | 3.36       | 2.91         | 4.16       | 3.87         |
| STEAP1 | six transmembrane epithelial antigen of prostate 1 | chr7q21              | ion transport                                                        | ---                          | -1.40         | -1.57           | 1.27      | 1.14        | 1.20      | 1.05        | -1.71      | -1.08        | 1.54       | -1.10        | 1.33       | 1.08         |
| STEAP3 | STEAP family member 3                              | chr2q14.2            | transport                                                            | ---                          | 1.12          | -1.07           | 1.18      | 1.06        | -1.01     | 1.09        | 1.02       | 1.09         | -1.12      | 1.26         | -1.04      | 1.26         |
| STEAP4 | STEAP family member 4                              | chr7q21.12           | pentose-phosphate shunt                                              | ---                          | 1.05          | -1.09           | 1.14      | 1.18        | -1.04     | 1.12        | 1.11       | 1.07         | -1.15      | -1.08        | 1.53       | 1.18         |
| STIM2  | stromal interaction molecule 2                     | chr4p15.2            | transport                                                            | ---                          | 1.05          | -1.15           | 1.08      | -1.02       | -1.03     | 1.10        | -1.16      | 1.07         | -1.63      | -1.28        | -1.39      | -1.59        |
| STK10  | serine/threonine kinase 10                         | chr5q35.1            | protein phosphorylation                                              | ---                          | -1.01         | -1.18           | -1.02     | 1.13        | 1.06      | 1.05        | 1.01       | 1.13         | 1.27       | 1.06         | -1.13      | -1.11        |
| STK10  | serine/threonine kinase 10                         | chr5q35.1            | protein phosphorylation                                              | ---                          | -1.16         | -1.10           | -1.08     | -1.02       | -1.06     | -1.04       | -1.00      | -1.00        | 1.25       | 1.25         | -1.13      | -1.27        |
| STK11  | serine/threonine kinase 11                         | chr19p13.3           | regulation of cell growth                                            | ---                          | -1.00         | 1.08            | 1.02      | 1.04        | 1.19      | 1.01        | 1.21       | 1.10         | 1.15       | 1.05         | 1.47       | 1.52         |
| STK16  | serine/threonine kinase 16                         | chr2q35              | protein phosphorylation                                              | ---                          | 1.00          | -1.05           | -1.07     | 1.17        | -1.06     | -1.16       | 1.05       | 1.23         | 1.38       | 1.36         | 1.42       | 1.72         |
| STK17A | serine/threonine kinase 17A                        | chr7p13              | protein phosphorylation                                              | ---                          | -1.05         | -1.12           | -1.00     | -1.15       | -1.08     | -1.16       | -1.15      | -1.01        | 1.17       | 1.06         | 1.39       | 1.07         |
| STK17A | serine/threonine kinase 17A                        | chr7p13              | protein phosphorylation                                              | ---                          | 1.05          | -1.02           | 1.05      | 1.07        | 1.00      | -1.08       | 1.39       | 1.25         | 2.15       | 1.64         | 2.40       | 2.25         |
| STK17B | serine/threonine kinase 17B                        | chr2q32.3            | protein phosphorylation                                              | ---                          | 1.19          | 1.14            | -1.07     | -1.25       | -1.09     | -1.13       | -1.61      | -1.25        | -1.06      | -1.22        | 1.71       | 1.33         |
| STK17B | serine/threonine kinase 17B                        | chr2q32.3            | protein phosphorylation                                              | ---                          | 1.35          | 1.43            | -1.11     | -1.02       | -1.04     | -1.15       | 1.30       | 1.08         | 1.40       | -1.06        | 1.98       | 1.08         |
| STK17B | serine/threonine kinase 17B                        | chr2q32.3            | protein phosphorylation                                              | ---                          | 1.16          | 1.35            | 1.03      | 1.29        | 1.01      | 1.01        | 1.14       | -1.01        | 1.82       | 1.72         | 3.09       | 2.31         |
| STK17B | serine/threonine kinase 17B                        | chr2q32.3            | protein phosphorylation                                              | ---                          | -1.05         | -1.57           | 1.09      | 1.14        | -1.25     | 1.60        | 1.59       | 1.09         | 6.15       | 4.78         | 3.45       | 2.97         |
| STK19  | serine/threonine kinase 19                         | chr6p21.3            | protein phosphorylation                                              | ---                          | -1.23         | -1.18           | 1.11      | 1.01        | 1.12      | 1.04        | 1.29       | 1.14         | 1.59       | 1.53         | 1.53       | 1.86         |
| STK19  | serine/threonine kinase 19                         | chr6p21.3            | protein phosphorylation                                              | ---                          | -1.17         | -1.17           | 1.01      | 1.08        | 1.13      | -1.07       | 1.35       | 1.31         | 1.53       | 1.48         | 1.57       | 1.87         |
| STK24  | serine/threonine kinase 24                         | chr13q31.2-q32.3     | protein phosphorylation                                              | ---                          | 1.22          | 1.06            | 1.12      | 1.05        | -1.46     | -1.02       | -1.44      | 1.13         | -1.51      | -1.17        | -1.91      | -1.44        |
| STK3   | serine/threonine kinase 3                          | chr8q22.2            | neural tube formation                                                | ---                          | 1.03          | 1.14            | 1.24      | 1.09        | -1.21     | -1.09       | 1.00       | 1.09         | -1.09      | 1.08         | 1.86       | 1.82         |
| STK32A | serine/threonine kinase 32A                        | chr5q32              | protein phosphorylation                                              | ---                          | 1.56          | 1.08            | -1.42     | -3.72       | -1.17     | 1.31        | 2.12       | 1.05         | 4.63       | 3.95         | -1.09      | -1.42        |
| STK32A | serine/threonine kinase 32A                        | chr5q32              | protein phosphorylation                                              | ---                          | 1.06          | -1.02           | 1.02      | 1.47        | -1.34     | -1.25       | 1.09       | 1.14         | -1.31      | -1.09        | -3.00      | -2.47        |
| STK32C | serine/threonine kinase 32C                        | chr10q26.3           | protein phosphorylation                                              | ---                          | 1.12          | -1.07           | 1.20      | 1.27        | 1.20      | 1.07        | 1.75       | 1.36         | 2.39       | 2.00         | 2.43       | 2.65         |
| STK33  | serine/threonine kinase 33                         | chr11p15.3           | protein phosphorylation                                              | ---                          | 1.12          | 1.12            | -1.10     | -1.21       | -1.07     | -1.03       | -1.23      | -1.01        | -2.38      | -2.07        | -3.42      | -3.43        |
| STK36  | serine/threonine kinase 36                         | chr2q35              | epithelial cilium movement                                           | ---                          | -1.05         | -1.08           | 1.10      | 1.28        | 1.00      | 1.01        | -1.18      | 1.02         | -2.85      | -1.85        | -4.42      | -2.79        |
| STK36  | serine/threonine kinase 36                         | chr2q35              | epithelial cilium movement                                           | ---                          | 1.01          | -1.05           | 1.18      | 1.08        | -1.03     | -1.01       | -1.14      | -1.05        | -2.10      | -1.92        | -3.64      | -2.41        |
| STK36  | serine/threonine kinase 36                         | chr2q35              | epithelial cilium movement                                           | ---                          | -1.02         | -1.11           | 1.04      | 1.26        | -1.07     | 1.10        | -1.18      | -1.02        | -2.77      | -1.90        | -3.66      | -2.76        |
| STK38  | serine/threonine kinase 38                         | chr6p21              | cellular protein modification process                                | ---                          | 1.07          | 1.00            | 1.10      | 1.20        | 1.66      | 1.25        | -1.26      | -1.17        | -2.67      | -1.48        | -1.44      | -1.30        |
| STK38  | serine/threonine kinase 38                         | chr6p21              | cellular protein modification process                                | ---                          | 2.79          | 1.36            | -1.20     | 1.90        | -1.02     | 2.52        | 2.10       | 5.68         | 2.90       | 1.68         | 1.76       | 3.78         |
| STK38  | serine/threonine kinase 38                         | chr6p21              | cellular protein modification process                                | ---                          | 1.03          | -1.07           | -1.03     | -1.03       | 1.04      | 1.06        | -1.17      | 1.02         | -1.75      | -1.49        | -1.18      | -1.06        |
| STK39  | serine/threonine kinase 39                         | chr2q24.3            | protein phosphorylation                                              | ---                          | 1.18          | 1.07            | 1.05      | 1.15        | -1.01     | 1.11        | -1.00      | -1.05        | -1.05      | 1.17         | 1.14       | 1.16         |
| STK4   | serine/threonine kinase 4                          | chr20q11.2-q13.2     | cell morphogenesis                                                   | ---                          | 1.36          | 1.32            | -1.17     | -1.12       | -1.11     | 1.06        | 1.30       | 1.04         | 1.26       | -1.03        | -1.30      | 1.18         |
| STK40  | serine/threonine kinase 40                         | chr1p34.3            | protein phosphorylation                                              | ---                          | 1.01          | -1.13           | 1.17      | 1.29        | -1.10     | -1.08       | 1.23       | 1.01         | 1.69       | 1.44         | 1.14       | 1.37         |
| STMN1  | stathmin 1                                         | chr1p36.11           | microtubule depolymerization                                         | ---                          | 1.04          | 1.03            | -1.01     | 1.06        | -1.03     | -1.07       | -1.08      | -1.13        | -1.24      | -1.25        | -1.28      | -1.37        |
| STMN3  | stathmin-like 3                                    | chr20q13.3           | nervous system development                                           | ---                          | -1.23         | 1.03            | -1.02     | -1.02       | 1.33      | -1.05       | -1.06      | 1.54         | 3.08       | 1.61         | 1.51       | 1.40         |
| STON1  | stonin 1                                           | chr2p16.3            | intracellular protein transport                                      | ---                          | 1.28          | 1.20            | 1.14      | -1.50       | -1.07     | 1.06        | -1.19      | -1.01        | -1.97      | -1.48        | -1.56      | -1.88        |
| STON2  | stonin 2                                           | chr14q31.1           | intracellular protein transport                                      | ---                          | -1.07         | -1.00           | 1.16      | -1.16       | 1.04      | -1.06       | -1.27      | 1.34         | -2.34      | -1.98        | -2.14      | -2.20        |
| STON2  | stonin 2                                           | chr14q31.1           | intracellular protein transport                                      | ---                          | 1.18          | 1.26            | 1.06      | -1.03       | -1.15     | 1.04        | -1.48      | -1.18        | -2.12      | -1.73        | -2.11      | -2.38        |
| STOX1  | storkhead box 1                                    | chr10q22.1           | 0                                                                    | ---                          | -1.02         | -1.43           | -1.26     | -1.28       | 1.39      | 1.70        | -1.48      | 1.06         | -2.68      | -1.89        | -2.10      | -3.79        |
| STOX1  | storkhead box 1                                    | chr10q22.1           | 0                                                                    | ---                          | -1.21         | 1.08            | -1.90     | -1.22       | 1.98      | 1.36        | -1.34      | -1.38        | -3.55      | -1.77        | -2.64      | -2.82        |
| STOX2  | storkhead box 2                                    | chr4q35.1            | maternal placenta development                                        | ---                          | -1.23         | -1.20           | -1.05     | 1.20        | -1.07     | -1.02       | -1.06      | -1.00        | -1.27      | -1.20        | -1.64      | -1.39        |
| STOX2  | storkhead box 2                                    | chr4q35.1            | maternal placenta development                                        | ---                          | 1.11          | -1.02           | 1.06      | 1.11        | 1.28      | 1.36        | 1.09       | 1.14         | -1.72      | -1.56        | -1.77      | -1.78        |
| STRA13 | stimulated by retinoic acid 13                     | chr17q25.3           | resolution of meiotic recombination intermediate                     | ---                          | 1.03          | -1.03           | -1.01     | 1.16        | 1.09      | -1.03       | 1.23       | 1.18         | 1.93       | 1.43         | 1.31       | 1.27         |
| STRA6  | stimulated by retinoic acid 6                      | chr15q24.1           | retinoid metabolic process                                           | ---                          | 1.26          | 1.01            | 1.07      | -1.06       | 1.13      | -1.04       | 1.24       | 1.41         | 1.07       | -1.44        | -1.50      | -1.47        |
| STRADB | STE20-related kinase adaptor 1                     | chr2q33.1            | cell morphogenesis                                                   | ---                          | 1.05          | 1.02            | -1.03     | -1.16       | -1.13     | 1.00        | -1.46      | -1.31        | -1.66      | -1.30        | -1.65      | -1.89        |
| STRBP  | spermatid perinuclear RNA binding protein          | chr9q33.3            | cellular component movement                                          | ---                          | 1.03          | 1.06            | -1.00     | -1.03       | -1.04     | 1.05        | -1.20      | -1.02        | -1.38      | -1.14        | -1.01      | -1.16        |
| STRBP  | spermatid perinuclear RNA binding protein          | chr9q33.3            | cellular component movement                                          | ---                          | 1.17          | 1.08            | 1.08      | 1.08        | -1.26     | 1.06        | -1.52      | -1.22        | -2.02      | -1.48        | -1.95      | -1.61        |
| STRBP  | spermatid perinuclear RNA binding protein          | chr9q33.3            | cellular component movement                                          | ---                          | -1.05         | -1.07           | -1.13     | -1.11       | 1.02      | 1.05        | -1.14      | 1.01         | -1.44      | -1.10        | -1.19      | -1.25        |
| STRC   | stereocilin                                        | chr15q15.3           | sensory perception of sound                                          | ---                          | -1.46         | 1.79            | -1.35     | -1.37       | 1.39      | 1.21        | 1.19       | 1.54         | -1.07      | -1.05        | 1.60       | 2.56         |
| STRIP1 | striatin interacting protein 1                     | chr1p13.3            | regulation of cell morphogenesis                                     | ---                          | 1.02          | -1.05           | -1.12     | -1.16       | -1.01     | -1.05       | -1.08      | 1.03         | -1.40      | -1.63        | -2.02      | -1.87        |
| STRIP2 | striatin interacting protein 2                     | chr7q32.1            | cytoskeleton organization                                            | ---                          | 1.37          | 1.34            | 1.10      | 1.17        | -2.05     | -1.18       | 1.06       | -1.07        | 1.58       | 1.51         | -2.70      | -2.08        |
| STRN   | striatin, calmodulin binding protein               | chr2p22.2            | locomotory behavior                                                  | ---                          | 1.24          | 1.20            | 1.05      | 1.02        | -1.04     | 1.15        | -1.22      | -1.22        | -1.50      | -1.36        | -1.29      | -1.49        |
| STRN   | striatin, calmodulin binding protein               | chr2p22.2            | locomotory behavior                                                  | ---                          | 1.36          | 1.23            | 1.04      | -1.23       | -1.19     | -1.17       | -1.13      | 1.20         | -1.69      | -1.82        | -1.87      | -1.85        |
| STRN   | striatin, calmodulin binding protein               | chr2p22.2            | locomotory behavior                                                  | ---                          | 1.14          | 1.00            | 1.61      | 1.30        | -1.28     | 1.06        | -1.12      | -1.32        | -2.03      | -1.53        | -3.55      | -2.10        |
| STRN   | striatin, calmodulin binding protein               | chr2p22.2            | locomotory behavior                                                  | ---                          | -1.16         | -1.10           | 1.39      | 1.12        | 1.58      | 1.33        | -1.34      | -1.11        | -2.58      | -1.83        | -3.18      | -2.96        |
| STRN3  | striatin, calmodulin binding protein               | chr14q13-q21         | negative regulation of transcription from RNA polymerase II promoter | ---                          | -1.23         | -1.67           | -1.17     | -1.45       | -2.06     | -1.16       | -1.52      | -1.35        | 1.18       | -1.01        | -1.51      | -1.77        |
| STS    | steroid sulfatase (microsomal)                     | chrXp22.32           | lipid metabolic process                                              | ---                          | 1.02          | -1.05           | 1.02      | -1.13       | 1.52      | 1.39        | 1.38       | -1.08        | 1.35       | 1.11         | 6.30       | 3.13         |

| ID         | Gene Title                    | Chromosomal Location | 1st Gene Ontology Biological Process       | Pathway                               | A2497 30 mins | A2497P' 30 mins | A2497 2 h | A2497P' 2 h | A2497 4 h | A2497P' 4 h | A2497 24 h | A2497P' 24 h | A2497 48 h | A2497P' 48 h | A2497 72 h | A2497P' 72 h |
|------------|-------------------------------|----------------------|--------------------------------------------|---------------------------------------|---------------|-----------------|-----------|-------------|-----------|-------------|------------|--------------|------------|--------------|------------|--------------|
| STS        | steroid sulfatase (microsom   | chrXp22.32           | lipid metabolic process                    | ---                                   | -1.05         | -1.03           | 1.05      | -1.22       | 1.03      | 1.03        | 1.08       | -1.09        | 1.17       | 1.16         | 1.17       | 1.08         |
| STS        | steroid sulfatase (microsom   | chrXp22.32           | lipid metabolic process                    | ---                                   | 1.14          | -1.01           | 1.21      | 1.23        | 1.03      | 1.08        | 1.15       | 1.11         | 1.12       | 1.16         | 1.58       | 1.43         |
| STS        | steroid sulfatase (microsom   | chrXp22.32           | lipid metabolic process                    | ---                                   | -1.15         | -1.17           | 1.19      | 1.07        | 1.26      | 1.23        | 1.01       | 1.13         | 1.60       | 1.42         | 2.06       | 2.00         |
| STT3A      | STT3A, subunit of the oligo   | chr11q23.3           | protein glycosylation                      | ---                                   | 1.26          | 1.26            | 1.11      | 1.08        | -1.01     | -1.10       | -1.09      | -1.06        | 1.24       | 1.19         | 1.34       | 1.30         |
| STT3B      | STT3B, subunit of the oligo   | chr3p23              | protein glycosylation                      | ---                                   | 1.03          | 1.09            | -1.07     | -1.09       | -1.09     | 1.00        | -1.12      | -1.07        | -1.25      | -1.08        | -1.17      | -1.26        |
| STX11      | syntaxin 11                   | chr6q24.2            | transport                                  | ---                                   | 1.59          | 1.60            | 1.46      | -1.03       | -1.02     | 1.82        | 1.11       | 3.09         | -1.07      | -1.09        | 1.99       | -1.06        |
| STX12      | syntaxin 12                   | chr1p35.3            | transport                                  | ---                                   | -1.05         | -1.11           | -1.06     | 1.14        | -1.05     | -1.06       | -1.13      | -1.08        | -1.03      | 1.10         | 1.11       | 1.23         |
| STX12      | syntaxin 12                   | chr1p35.3            | transport                                  | ---                                   | 1.10          | 1.00            | 1.14      | 1.19        | -1.01     | 1.11        | -1.06      | -1.07        | -1.24      | -1.01        | 1.29       | 1.29         |
| STX16      | syntaxin 16                   | chr20q13.32          | transport                                  | ---                                   | -1.04         | -1.12           | 1.12      | -1.02       | 1.01      | 1.15        | -1.60      | -1.25        | -1.18      | -1.02        | 1.87       | 1.37         |
| STX16      | syntaxin 16                   | chr20q13.32          | transport                                  | ---                                   | 1.02          | 1.04            | 1.04      | -1.21       | 1.27      | 1.20        | -1.15      | -1.08        | 1.27       | 1.38         | 1.35       | 1.43         |
| STX17      | syntaxin 17                   | chr9q31.1            | autophagic vacuole fusion                  | ---                                   | 1.07          | -1.13           | -1.07     | 1.11        | -1.40     | -1.00       | -1.01      | 1.06         | -1.90      | -1.33        | -1.93      | -2.09        |
| STX17      | syntaxin 17                   | chr9q31.1            | autophagic vacuole fusion                  | ---                                   | -1.13         | 1.04            | 1.29      | 1.01        | -1.01     | -1.16       | -1.18      | -1.13        | -1.56      | -1.61        | -1.24      | -1.48        |
| STX17      | syntaxin 17                   | chr9q31.1            | autophagic vacuole fusion                  | ---                                   | -1.13         | 1.00            | 1.11      | 1.10        | -1.06     | 1.05        | -1.06      | -1.03        | -1.69      | -1.21        | -1.33      | -1.13        |
| STX17      | syntaxin 17                   | chr9q31.1            | autophagic vacuole fusion                  | ---                                   | 1.18          | 1.06            | 1.19      | -1.00       | -1.24     | 1.04        | -1.09      | -1.91        | -1.41      | -1.33        | -1.32      | ---          |
| STX18      | syntaxin 18                   | chr4p16.3-p16.2      | transport                                  | ---                                   | -1.07         | -1.05           | -1.03     | -1.01       | -1.04     | -1.12       | 1.13       | 1.07         | -1.00      | -1.37        | -1.14      | -1.11        |
| STX1A      | syntaxin 1A (brain)           | chr7q11.23           | positive regulation of neurotransmitter se | ---                                   | -1.26         | 1.14            | -1.14     | 1.19        | 1.18      | 1.34        | -1.24      | 1.08         | -1.65      | -1.47        | -1.11      | -1.17        |
| STX2       | syntaxin 2                    | chr12q24.33          | intracellular protein transport            | ---                                   | 1.14          | 1.12            | 1.13      | -1.15       | 1.14      | 1.13        | -1.32      | -1.24        | -1.37      | -1.30        | -1.21      | -1.34        |
| STX3       | syntaxin 3                    | chr11q12.1           | transport                                  | ---                                   | -1.21         | 1.08            | -1.01     | -1.03       | 1.10      | -1.00       | 1.34       | 1.06         | 1.55       | 1.27         | 1.92       | 1.69         |
| STX4       | syntaxin 4                    | chr16p11.2           | transport                                  | ---                                   | 1.08          | 1.06            | -1.06     | 1.19        | -1.08     | -1.07       | 1.86       | 1.67         | 2.30       | 1.89         | 1.43       | 1.40         |
| STX4       | syntaxin 4                    | chr16p11.2           | protein complex assembly                   | ---                                   | 1.00          | -1.01           | 1.16      | 1.11        | 1.23      | 1.04        | 1.32       | 1.22         | 1.66       | 1.22         | 1.50       | 1.52         |
| STX5       | syntaxin 5                    | chr11q12.3           | transport                                  | ---                                   | -1.04         | -1.14           | -1.05     | -1.04       | -1.05     | 1.12        | -1.12      | -1.06        | 1.03       | 1.12         | 1.18       | 1.47         |
| STX7       | syntaxin 7                    | chr6q23.1            | intracellular protein transport            | ---                                   | -1.05         | -1.13           | 1.05      | -1.13       | 1.00      | -1.01       | -1.01      | 1.09         | -1.20      | 1.01         | -1.56      | -1.46        |
| STX7       | syntaxin 7                    | chr6q23.1            | intracellular protein transport            | ---                                   | -1.01         | 1.01            | 1.08      | -1.02       | 1.16      | -1.09       | 1.13       | -1.10        | -1.22      | -1.32        | -1.18      | -1.39        |
| STXBP1     | syntaxin binding protein 1    | chr9q34.1            | platelet degranulation                     | ---                                   | 1.04          | 1.02            | -1.02     | -1.13       | -1.00     | -1.02       | 1.02       | -1.06        | 1.12       | 1.25         | 1.12       | 1.24         |
| STXBP2     | syntaxin binding protein 2    | chr19p13.3-p13.2     | leukocyte mediated cytotoxicity            | ---                                   | 1.06          | -1.04           | 1.08      | 1.14        | 1.09      | 1.08        | 1.12       | 1.19         | 1.21       | 1.10         | 1.30       | 1.28         |
| STXBP3     | syntaxin binding protein 3    | chr1p13.3            | transport                                  | ---                                   | -1.12         | -1.46           | -1.16     | -1.16       | 1.12      | 1.17        | 1.39       | 1.00         | -1.05      | -1.14        | 1.24       | -1.13        |
| STXBP4     | syntaxin binding protein 4    | chr17q22             | protein targeting                          | ---                                   | 1.07          | -1.11           | 1.15      | -1.08       | 1.30      | 1.52        | -1.16      | -1.03        | -1.84      | -1.85        | -2.27      | -2.39        |
| STXBP4     | syntaxin binding protein 4    | chr17q22             | protein targeting                          | ---                                   | 1.03          | -1.10           | -1.17     | -1.14       | -1.27     | -1.02       | 1.08       | -1.55        | -1.81      | -2.48        | -2.41      | ---          |
| STXBP5     | syntaxin binding protein 5    | chr6q24.3            | transport                                  | ---                                   | 1.06          | -1.17           | 1.11      | 1.17        | 1.02      | 1.23        | -1.13      | -1.19        | -2.09      | -1.93        | -2.25      | -1.28        |
| STXBP5     | syntaxin binding protein 5    | chr6q24.3            | transport                                  | ---                                   | 1.59          | 1.27            | 1.05      | -1.10       | -1.43     | -1.63       | -1.31      | 1.15         | -1.99      | -1.62        | -1.75      | -2.12        |
| STXBP5-AS1 | STXBP5 antisense RNA 1        | chr6q24.3            | 0                                          | ---                                   | 1.93          | 2.06            | 1.44      | 1.14        | -1.32     | 1.72        | -2.12      | -1.58        | 4.66       | 3.88         | 2.72       | 2.83         |
| STXBP5L    | syntaxin binding protein 5L   | chr3q13.33           | transport                                  | ---                                   | 1.52          | 1.44            | -1.20     | 1.21        | 1.11      | 1.29        | -1.03      | 1.09         | -1.94      | -2.48        | -1.98      | -1.31        |
| STXBP5L    | syntaxin binding protein 5L   | chr3q13.33           | transport                                  | ---                                   | 1.15          | -1.02           | 1.10      | 1.24        | -1.21     | -1.12       | -1.08      | -3.46        | -2.93      | -3.05        | -2.39      | ---          |
| STYK1      | serine/threonine/tyrosine ki  | chr12p13.2           | protein phosphorylation                    | ---                                   | 1.31          | 1.15            | 1.21      | 1.91        | 1.72      | 1.48        | 1.29       | -1.01        | 1.34       | 1.47         | -2.53      | -2.04        |
| STYX       | serine/threonine/tyrosine in  | ---                  | protein dephosphorylation                  | ---                                   | 1.01          | 1.03            | -1.03     | 1.04        | -1.08     | 1.13        | -1.16      | 1.00         | -1.35      | 1.00         | -1.29      | -1.25        |
| STYX       | serine/threonine/tyrosine in  | ---                  | protein dephosphorylation                  | ---                                   | 1.11          | 1.05            | 1.20      | 1.37        | 1.16      | 1.09        | -1.11      | -1.03        | 1.55       | 1.40         | 1.23       | 1.18         |
| STYXL1     | serine/threonine/tyrosine in  | chr7q11.23           | protein dephosphorylation                  | ---                                   | -1.11         | -1.29           | -1.05     | -1.14       | -1.03     | -1.04       | 1.01       | 1.13         | 1.29       | 1.14         | 1.14       | 1.28         |
| SUB1       | SUB1 homolog (S. cerevisi     | chr5p13.3            | transcription, DNA-dependent               | ---                                   | 1.33          | 1.26            | -1.07     | -1.18       | -1.11     | 1.05        | -1.65      | -1.30        | -1.46      | -1.38        | -1.99      | -2.32        |
| SUB1       | SUB1 homolog (S. cerevisi     | chr5p13.3            | transcription, DNA-dependent               | ---                                   | 1.01          | 1.03            | -1.15     | -1.09       | -1.11     | 1.07        | -1.23      | -1.11        | -1.36      | -1.12        | -1.71      | -1.71        |
| SUCLA2     | succinate-CoA ligase, ADP     | chr13q12.2-q13.3     | tricarboxylic acid cycle                   | Krebs-TCA_Cycle // GenMAPP            | -1.06         | -1.01           | -1.05     | -1.02       | -1.08     | -1.01       | -1.02      | -1.03        | 1.10       | -1.12        | -1.18      | ---          |
| SUCLA2-AS  | SUCLA2 antisense RNA 1        | ---                  | 0                                          | ---                                   | 1.37          | 1.15            | -1.32     | 1.21        | -1.47     | 1.09        | 1.22       | 1.00         | -3.65      | -3.01        | -2.72      | -2.30        |
| SUCNR1     | succinate receptor 1          | chr3q25.1            | signal transduction                        | GPCRDB_Class_A_Rhodopsin-like // GenM | 1.13          | 1.00            | -1.07     | -1.40       | -1.60     | -1.20       | 1.73       | -1.46        | -1.40      | 1.16         | -1.96      | -3.38        |
| SUCO       | SUN domain containing oss     | chr1q24              | ossification                               | ---                                   | 1.06          | 1.11            | -1.06     | 1.07        | -1.06     | 1.07        | -1.01      | 1.03         | 1.02       | 1.24         | 1.28       | 1.40         |
| SUDS3      | suppressor of defective site  | chr12q24.23          | negative regulation of transcription from  | ---                                   | -1.06         | 1.04            | -1.05     | -1.08       | -1.28     | -1.10       | -1.23      | -1.17        | -1.36      | -1.18        | -1.37      | -1.56        |
| SUFU       | suppressor of fused homolo    | chr10q24.32          | negative regulation of transcription from  | ---                                   | 1.14          | 1.01            | -1.18     | -1.12       | -1.11     | 1.14        | -1.38      | -1.12        | -1.17      | -1.06        | -1.23      | 1.05         |
| SUGP1      | SURP and G patch domain       | chr19p13.11          | mRNA splicing, via spliceosome             | mRNA_processing_Reactome // GenMAPP   | 1.18          | 1.17            | -1.11     | 1.04        | 1.01      | 1.02        | -1.17      | 1.05         | -1.04      | -1.14        | -1.68      | -1.03        |
| SUGP2      | SURP and G patch domain       | chr19p12             | RNA processing                             | mRNA_processing_Reactome // GenMAPP   | -1.15         | -1.19           | 1.13      | 1.27        | 1.02      | -1.01       | 1.02       | 1.08         | 1.18       | 1.07         | 1.54       | 1.54         |
| SGT1       | SGT1, suppressor of G2 all    | chr13q14.3           | mitosis                                    | ---                                   | 1.33          | 1.14            | 1.14      | 1.09        | -1.10     | 1.18        | -1.34      | -1.16        | -1.57      | -1.30        | -1.14      | -1.20        |
| SGUT1P1    | suppressor of G2 allele of S  | chr9p13.3            | 0                                          | ---                                   | -1.11         | -1.25           | 1.07      | 1.16        | -1.05     | 1.03        | -1.00      | 1.17         | -1.43      | -1.24        | -1.41      | -1.24        |
| SULF2      | sulfatase 2                   | chr20q12-q13.2       | kidney development                         | ---                                   | -1.21         | -1.29           | -1.13     | -1.02       | 1.10      | -1.06       | -1.02      | 1.12         | -1.28      | -1.21        | -1.36      | -1.16        |
| SULF2      | sulfatase 2                   | chr20q12-q13.2       | kidney development                         | ---                                   | 1.23          | -1.03           | 1.03      | 1.11        | 1.16      | -1.06       | -1.14      | -1.00        | -1.44      | -1.57        | -1.74      | -1.27        |
| SULT1A1    | sulfotransferase family, cyto | chr16p12.1           | catecholamine metabolic process            | ---                                   | -1.30         | -1.10           | -1.08     | 1.03        | 1.16      | -1.18       | -1.06      | -1.15        | -1.59      | -1.38        | -1.76      | -1.34        |
| SULT1A2    | sulfotransferase family, cyto | chr16p12.1           | catecholamine metabolic process            | ---                                   | 1.16          | -1.03           | 1.18      | 1.39        | 1.06      | -1.05       | -1.02      | 1.05         | -1.76      | -1.33        | -1.57      | -1.34        |
| SULT1A2    | sulfotransferase family, cyto | chr16p12.1           | catecholamine metabolic process            | ---                                   | -1.07         | -1.25           | 1.11      | 1.38        | 1.05      | 1.04        | -1.05      | -1.02        | -1.19      | -1.03        | -1.49      | -1.49        |
| SULT1C2    | sulfotransferase family, cyto | chr2q12.3            | xenobiotic metabolic process               | ---                                   | -1.02         | -1.39           | -1.77     | -13.22      | 1.08      | 2.57        | 1.38       | -1.89        | 2.39       | 1.35         | 1.80       | 1.88         |
| SULT1C4    | sulfotransferase family, cyto | chr2q12.3            | xenobiotic metabolic process               | ---                                   | -1.04         | 3.30            | -2.00     | -1.39       | -2.04     | 1.06        | -1.00      | 1.09         | -1.29      | -1.10        | 2.37       | 2.40         |
| SULT2A1    | sulfotransferase family, cyto | chr19q13.3           | lipid metabolic process                    | ---                                   | 3.94          | 2.73            | 1.10      | -1.91       | -2.63     | 1.15        | -2.01      | -6.24        | -4.91      | 2.83         | 2.41       | 2.18         |
| SUMF1      | sulfatase modifying factor    | chr3p26.1            | phospholipid metabolic process             | ---                                   | -1.06         | -1.07           | -1.05     | 1.03        | -1.07     | 1.04        | -1.35      | -1.03        | -1.56      | -1.14        | -1.64      | -1.44        |
| SUMO1      | small ubiquitin-like modifi   | chr2q33              | DNA repair                                 | ---                                   | 1.23          | 1.00            | 1.09      | 1.11        | -1.15     | 1.14        | -1.07      | 1.07         | -1.86      | -1.55        | -1.85      | -2.38        |
| SUMO1      | small ubiquitin-like modifi   | chr2q33              | DNA repair                                 | ---                                   | -1.03         | 1.02            | -1.11     | -1.10       | -1.05     | -1.01       | -1.13      | -1.09        | -1.08      | 1.05         | -1.10      | -1.22        |
| SUMO3      | small ubiquitin-like modifi   | chr21q22.3           | protein sumoylation                        | Circadian_Exercise // GenMAPP         | 1.01          | 1.00            | 1.02      | -1.01       | 1.07      | -1.04       | -1.03      | -1.04        | 1.05       | 1.07         | -1.16      | -1.24        |
| SUMO3      | small ubiquitin-like modifi   | chr21q22.3           | protein sumoylation                        | Circadian_Exercise // GenMAPP         | 1.11          | 1.17            | -1.08     | 1.07        | -1.18     | -1.04       | -1.03      | -1.09        | 1.50       | 1.34         | 1.34       | 1.31         |
| SUN1       | Sad1 and UNC84 domain c       | chr7p22.3            | nuclear envelope organization              | ---                                   | -1.28         | -1.23           | -1.07     | 1.10        | 1.00      | 1.04        | 1.37       | 1.07         | 2.45       | 2.02         | 1.93       | 1.70         |
| SUN2       | Sad1 and UNC84 domain c       | chr22q13.1           | nuclear envelope organization              | ---                                   | 1.09          | 1.00            | 1.22      | 1.10        | -1.27     | 1.02        | 1.01       | -1.08        | 1.28       | 1.34         | 1.88       | 2.07         |
| SUN5       | Sad1 and UNC84 domain c       | chr20q11.21          | spermatogenesis                            | ---                                   | 3.17          | 1.78            | -2.24     | 3.15        | 2.12      | -2.12       | 1.52       | 1.12         | 2.88       | 1.55         | -2.37      | -2.08        |
| SUOX       | sulfite oxidase               | chr12q13.2           | sulfur amino acid metabolic process        | ---                                   | -1.03         | -1.09           | 1.09      | 1.01        | 1.09      | -1.19       | -1.48      | -1.43        | -1.50      | -1.87        | -1.90      | -1.88        |

| ID       | Gene Title                                                | Chromosomal Location | 1st Gene Ontology Biological Process        | Pathway | A2497 30 mins | A2497P' 30 mins | A2497 2 h | A2497P' 2 h | A2497 4 h | A2497P' 4 h | A2497 24 h | A2497P' 24 h | A2497 48 h | A2497P' 48 h | A2497 72 h | A2497P' 72 h |
|----------|-----------------------------------------------------------|----------------------|---------------------------------------------|---------|---------------|-----------------|-----------|-------------|-----------|-------------|------------|--------------|------------|--------------|------------|--------------|
| SUOX     | sulfite oxidase                                           | chr12q13.2           | sulfur amino acid metabolic process         | ---     | 1.06          | 1.16            | -1.14     | -1.06       | -1.12     | -1.02       | -1.26      | 1.00         | -2.59      | -2.83        | -2.52      | -2.31        |
| SUPT20H  | suppressor of Ty 20 homolog                               | chr13q13.3           | autophagy                                   | ---     | 1.00          | 1.01            | 1.21      | 1.11        | 1.00      | 1.03        | -1.11      | 1.15         | -2.56      | -1.42        | -1.64      | -1.55        |
| SUPT3H   | suppressor of Ty 3 homolog                                | chr6p21.1-p21.3      | transcription, DNA-dependent                | ---     | 1.02          | 1.09            | -1.10     | 1.00        | -1.10     | -1.16       | 1.08       | 1.13         | -1.21      | -1.34        | -1.78      | -1.63        |
| SUPT4H1  | suppressor of Ty 4 homolog                                | chr17q21-q23         | negative regulation of transcription from   | ---     | -1.02         | -1.08           | -1.04     | -1.02       | 1.09      | 1.09        | -1.10      | -1.01        | -1.23      | -1.08        | -1.19      | -1.09        |
| SUPT7L   | suppressor of Ty 7 (S. cerevisiae)                        | chr2p23.3            | transcription, DNA-dependent                | ---     | 1.04          | 1.07            | 1.05      | -1.03       | 1.15      | 1.09        | 1.01       | 1.01         | -2.08      | -1.96        | -1.70      | -1.52        |
| SUPV3L1  | suppressor of var1, 3-like 1                              | chr10q22.1           | mitochondrial mRNA catabolic process        | ---     | 1.06          | 1.04            | 1.04      | 1.00        | 1.09      | 1.03        | 1.00       | -1.02        | 1.06       | -1.01        | 1.16       | 1.11         |
| SURF2    | surfeit 2                                                 | chr9q34.2            | 0                                           | ---     | -1.03         | -1.09           | -1.08     | -1.10       | -1.06     | -1.17       | 1.11       | 1.15         | -1.18      | -1.51        | -1.29      | -1.11        |
| SURF4    | surfeit 4                                                 | chr9q34.2            | Golgi organization                          | ---     | -1.06         | -1.06           | 1.07      | -1.06       | 1.13      | 1.08        | -1.13      | -1.12        | 1.33       | 1.27         | 1.60       | 1.61         |
| SURF4    | surfeit 4                                                 | chr9q34.2            | Golgi organization                          | ---     | -1.34         | -1.17           | -1.27     | -1.34       | -1.18     | -1.12       | -1.09      | -1.05        | -1.29      | -1.17        | 1.43       | 1.79         |
| SURF4    | surfeit 4                                                 | chr9q34.2            | Golgi organization                          | ---     | -1.08         | -1.03           | 1.01      | -1.09       | 1.05      | 1.03        | -1.06      | -1.09        | 1.27       | 1.15         | 1.34       | 1.36         |
| SURF6    | surfeit 6                                                 | chr9q34.2            | ribosome biogenesis                         | ---     | -1.14         | -1.34           | 1.08      | 1.24        | 1.04      | -1.09       | 1.20       | 1.25         | 1.61       | 1.41         | 1.62       | 1.74         |
| SUV39H1  | suppressor of variegation 3 homolog A                     | chrXp11.23           | chromatin silencing at rDNA                 | ---     | -1.06         | -1.14           | 1.01      | 1.15        | 1.06      | -1.04       | 1.03       | 1.01         | 1.50       | 1.24         | 1.21       | 1.47         |
| SUV420H1 | suppressor of variegation 4 homolog 1                     | chr11q13.2           | transcription, DNA-dependent                | ---     | 1.09          | 1.22            | 1.03      | -1.07       | -1.12     | 1.02        | -1.19      | -1.10        | -2.37      | -2.17        | -1.51      | -1.57        |
| SUV420H1 | suppressor of variegation 4 homolog 1                     | chr11q13.2           | transcription, DNA-dependent                | ---     | -1.05         | -1.11           | 1.11      | 1.18        | 1.12      | 1.05        | 1.18       | 1.08         | 1.79       | 1.83         | 1.55       | 1.58         |
| SUV420H1 | suppressor of variegation 4 homolog 1                     | chr11q13.2           | transcription, DNA-dependent                | ---     | -1.04         | 1.06            | 1.03      | -1.09       | 1.13      | 1.01        | -1.11      | -1.18        | -2.07      | -2.00        | -1.47      | -1.66        |
| SUZ12    | SUZ12 polycomb repressive complex 1 subunit               | chr17q11.2           | negative regulation of transcription from   | ---     | -1.07         | -1.06           | -1.03     | -1.04       | -1.00     | -1.02       | -1.20      | -1.18        | -1.47      | -1.30        | -1.22      | -1.24        |
| SV2B     | synaptic vesicle glycoprotein 2B                          | chr15q26.1           | transport                                   | ---     | 1.16          | 1.08            | 1.45      | 1.74        | 1.05      | -1.15       | -1.18      | -1.01        | -2.62      | -2.27        | -3.35      | -4.21        |
| SVEP1    | sushi, von Willebrand factor binding protein 1            | chr9q32              | cell adhesion                               | ---     | -1.19         | 1.26            | 1.12      | 1.20        | 1.32      | -1.15       | -1.06      | 1.19         | -4.42      | -3.82        | -8.20      | -2.05        |
| SVEP1    | sushi, von Willebrand factor binding protein 1            | chr9q32              | cell adhesion                               | ---     | 2.12          | -1.19           | -1.75     | 1.27        | -1.20     | 1.74        | -1.27      | 1.24         | -2.25      | 1.40         | -1.21      | -2.29        |
| SVEP1    | sushi, von Willebrand factor binding protein 1            | chr9q32              | cell adhesion                               | ---     | -1.63         | -1.26           | -1.10     | 1.00        | -1.22     | 1.10        | 1.39       | -1.14        | -3.29      | -2.56        | -3.36      | -2.73        |
| SVEP1    | sushi, von Willebrand factor binding protein 1            | chr9q32              | cell adhesion                               | ---     | 3.81          | -1.08           | 1.01      | -1.44       | -1.65     | -1.76       | -1.57      | -1.35        | -3.67      | -2.46        | -5.43      | -4.38        |
| SVEP1    | sushi, von Willebrand factor binding protein 1            | chr9q32              | cell adhesion                               | ---     | 1.49          | 1.44            | 1.11      | -1.25       | 1.03      | 1.07        | 1.02       | 1.02         | -2.65      | -2.27        | -3.13      | -3.51        |
| SVIL     | supervillin                                               | chr10p11.2           | cytoskeleton organization                   | ---     | -1.04         | -1.06           | -1.10     | 1.02        | -1.06     | -1.07       | 1.20       | 1.14         | -1.43      | -1.22        | -1.65      | -1.38        |
| SVIL     | supervillin                                               | chr10p11.2           | cytoskeleton organization                   | ---     | -1.24         | -1.23           | -1.06     | 1.16        | 1.12      | -1.09       | 1.28       | -1.01        | -1.20      | -1.00        | -1.36      | -1.06        |
| SVIL     | supervillin                                               | chr10p11.2           | cytoskeleton organization                   | ---     | 1.02          | -2.02           | -2.04     | 2.21        | 2.59      | 1.24        | -4.10      | -6.67        | 9.13       | 2.20         | 3.20       | 2.88         |
| SVIP     | small VCP/p97-interacting protein 1                       | chr11p14.2           | 0                                           | ---     | -1.10         | -1.00           | 1.14      | -1.01       | 1.17      | 1.01        | -1.38      | -1.14        | -1.53      | -1.23        | -1.50      | -1.73        |
| SVIP     | small VCP/p97-interacting protein 1                       | chr11p14.2           | 0                                           | ---     | 1.30          | 1.15            | -1.10     | 1.31        | -1.22     | 1.28        | -1.19      | -1.41        | -1.48      | -1.25        | -2.20      | -1.88        |
| SVIP     | small VCP/p97-interacting protein 1                       | chr11p14.2           | 0                                           | ---     | 1.07          | 1.06            | 1.03      | -1.01       | -1.17     | -1.19       | -1.16      | -1.05        | -1.56      | -1.26        | -1.92      | -1.78        |
| SWAP70   | SWAP switching B-cell coreceptor                          | chr11p15             | somatic cell DNA recombination              | ---     | 1.33          | 1.43            | 1.09      | -1.04       | -1.05     | -1.14       | -1.05      | 1.30         | 1.64       | 1.53         | 1.55       | -1.10        |
| SWAP70   | SWAP switching B-cell coreceptor                          | chr11p15             | somatic cell DNA recombination              | ---     | 1.20          | 1.11            | 1.12      | 1.01        | -1.17     | -1.04       | -1.43      | -1.27        | -1.58      | -1.57        | -1.26      | -1.45        |
| SWAP70   | SWAP switching B-cell coreceptor                          | chr11p15             | somatic cell DNA recombination              | ---     | 1.09          | 1.04            | 1.01      | 1.01        | -1.02     | 1.08        | 1.08       | 1.05         | 1.09       | 1.13         | 1.16       | 1.17         |
| SWAP70   | SWAP switching B-cell coreceptor                          | chr11p15             | somatic cell DNA recombination              | ---     | -1.16         | -1.12           | -1.07     | 1.03        | 1.09      | -1.10       | 1.14       | 1.21         | 1.14       | -1.21        | -1.30      | -1.04        |
| SYAP1    | synapse associated protein                                | chrXp22.2            | 0                                           | ---     | -1.10         | -1.03           | 1.07      | 1.08        | 1.17      | -1.03       | 1.25       | 1.03         | 1.32       | 1.03         | 1.43       | 1.44         |
| SYBU     | syntabulin (syntaxin-interacting protein 1)               | chr8q23.2            | 0                                           | ---     | 1.11          | 1.06            | 1.09      | -1.09       | -1.08     | -1.01       | 1.06       | 1.04         | -1.25      | -1.09        | -1.17      | -1.63        |
| SYCE3    | synaptonemal complex protein 3                            | chr22q13.33          | apoptotic process                           | ---     | 1.81          | 1.27            | -1.52     | -3.11       | 3.89      | 8.64        | 4.03       | 1.18         | 2.97       | 3.27         | 3.10       | 3.85         |
| SYCP2    | synaptonemal complex protein 2                            | chr20q13.33          | apoptotic process                           | ---     | 1.74          | 1.30            | 1.85      | 4.76        | 1.19      | 1.26        | -1.28      | -1.03        | -2.20      | -1.29        | -1.79      | -2.23        |
| SYCP2L   | synaptonemal complex protein 2L                           | chr6p24.2            | 0                                           | ---     | 1.85          | 2.69            | -1.52     | 1.14        | -1.17     | -3.60       | 3.87       | 1.53         | 1.35       | 1.34         | -1.08      | 1.43         |
| SYCP3    | synaptonemal complex protein 3                            | chr12q               | cell cycle                                  | ---     | -1.04         | 1.03            | -1.05     | 1.15        | 1.17      | 1.74        | 1.10       | 1.13         | -1.36      | 1.39         | -1.78      | -1.93        |
| SYDE1    | synapse defective 1, Rho GTPase activating protein 1      | chr19p13.12          | signal transduction                         | ---     | 1.01          | -1.09           | 1.01      | 1.20        | 1.05      | -1.08       | 1.52       | 1.53         | 2.11       | 1.91         | 1.37       | 1.95         |
| SYDE1    | synapse defective 1, Rho GTPase activating protein 1      | chr19p13.12          | signal transduction                         | ---     | 1.08          | -1.04           | -1.04     | 1.08        | -1.01     | -1.09       | 1.60       | 1.35         | 2.17       | 2.03         | 1.35       | 1.77         |
| SYDE1    | synapse defective 1, Rho GTPase activating protein 1      | chr19p13.12          | signal transduction                         | ---     | 1.04          | -1.10           | 1.08      | 1.31        | -1.01     | 1.23        | 1.38       | 1.40         | 2.21       | 2.25         | 1.36       | 1.83         |
| SYDE1    | synapse defective 1, Rho GTPase activating protein 1      | chr19p13.12          | signal transduction                         | ---     | -1.26         | -1.20           | 1.81      | 1.26        | 1.13      | 1.44        | 3.36       | 1.25         | 2.38       | 1.69         | 1.64       | 2.04         |
| SYMPK    | sympkin                                                   | chr19q13.3           | mRNA polyadenylation                        | ---     | 1.07          | -1.08           | 1.22      | 1.30        | 1.03      | 1.09        | 1.04       | 1.21         | 1.08       | -1.15        | 1.00       | 1.20         |
| SYN1     | synapsin I                                                | chrXp11.23           | synaptic transmission                       | ---     | 1.14          | 1.01            | 1.09      | 1.13        | -1.36     | -1.21       | -1.17      | -2.18        | 1.02       | 1.24         | -1.46      | -1.71        |
| SYN2     | synapsin II                                               | chr3p25              | synaptic transmission                       | ---     | -1.77         | 1.45            | -2.50     | 1.57        | 4.01      | 3.07        | -3.52      | 1.93         | 1.83       | 7.73         | 1.02       | 6.35         |
| SYN2     | synapsin II                                               | chr3p25              | synaptic transmission                       | ---     | 1.83          | 1.50            | 1.60      | -2.36       | 3.38      | 2.26        | -2.44      | 1.07         | 1.69       | 1.82         | 1.81       | 1.19         |
| SYNC     | syncoilin, intermediate filament protein                  | chr1p35.1            | intermediate filament-based process         | ---     | -1.00         | 1.06            | 1.00      | -1.15       | 1.11      | 1.21        | -1.29      | -1.29        | -1.96      | -1.30        | -1.37      | -1.42        |
| SYNCRIP  | synaptotagmin binding, cytosolic                          | chr6q14-q15          | mRNA splicing, via spliceosome              | ---     | 1.12          | 1.07            | -1.02     | -1.10       | -1.04     | -1.04       | -1.36      | -1.12        | 1.06       | 1.06         | 1.28       | -1.00        |
| SYNCRIP  | synaptotagmin binding, cytosolic                          | chr6q14-q15          | mRNA splicing, via spliceosome              | ---     | 1.04          | 1.03            | -1.01     | 1.06        | -1.07     | -1.02       | 1.05       | -1.02        | -1.36      | -1.17        | -1.49      | -2.07        |
| SYNCRIP  | synaptotagmin binding, cytosolic                          | chr6q14-q15          | mRNA splicing, via spliceosome              | ---     | 1.03          | 1.08            | 1.07      | -1.03       | -1.08     | -1.14       | 1.40       | 1.08         | -1.13      | -1.31        | -1.51      | -1.67        |
| SYNCRIP  | synaptotagmin binding, cytosolic                          | chr6q14-q15          | mRNA splicing, via spliceosome              | ---     | -1.10         | -1.07           | -1.05     | 1.00        | -1.09     | 1.06        | -1.13      | -1.04        | -1.20      | -1.07        | -1.21      | -1.09        |
| SYNE1    | spectrin repeat containing, nuclear envelope organization | chr6q25              | nucleus organization                        | ---     | -2.22         | -1.90           | -1.11     | -2.47       | -1.16     | -1.20       | 1.35       | 1.56         | 2.11       | 1.67         | -1.66      | -2.46        |
| SYNE1    | spectrin repeat containing, nuclear envelope organization | chr6q25              | nucleus organization                        | ---     | -1.28         | -1.48           | -1.04     | 1.19        | -1.12     | -1.43       | 1.62       | 1.01         | 1.39       | 1.10         | 1.63       | 1.29         |
| SYNE1    | spectrin repeat containing, nuclear envelope organization | chr6q25              | nucleus organization                        | ---     | -1.07         | -1.10           | 1.14      | 1.07        | 1.09      | 1.02        | -1.04      | -1.14        | -3.14      | -2.96        | -2.44      | -2.70        |
| SYNE2    | spectrin repeat containing, nuclear envelope organization | chr14q23.2           | nuclear envelope organization               | ---     | -1.14         | -1.15           | 1.16      | 1.16        | 1.18      | 1.03        | -1.01      | -1.11        | 1.09       | 1.18         | 1.20       | 1.50         |
| SYNE2    | spectrin repeat containing, nuclear envelope organization | chr14q23.2           | nuclear envelope organization               | ---     | -1.05         | 1.04            | 1.29      | 1.03        | 1.15      | 1.13        | 1.02       | 1.08         | -1.94      | -1.58        | -2.07      | -1.62        |
| SYNE2    | spectrin repeat containing, nuclear envelope organization | chr14q23.2           | nuclear envelope organization               | ---     | -1.15         | -1.27           | 1.08      | -1.05       | 1.39      | 1.08        | 1.44       | 1.01         | 2.90       | 3.02         | 2.34       | 2.62         |
| SYNE2    | spectrin repeat containing, nuclear envelope organization | chr14q23.2           | nuclear envelope organization               | ---     | -1.09         | 1.05            | 1.79      | 1.41        | 1.31      | 1.13        | -1.07      | -1.09        | -1.77      | -1.75        | -1.58      | -1.42        |
| SYNGAP1  | synaptic Ras GTPase activating protein 1                  | chr6p21.3            | signal transduction                         | ---     | -1.16         | -1.49           | -1.46     | -1.38       | -2.33     | -1.91       | -2.25      | 1.09         | 1.43       | 1.27         | -1.04      | -1.42        |
| SYNGR2   | synaptogyrin 2                                            | chr17q25.3           | protein targeting                           | ---     | -1.05         | -1.09           | 1.03      | 1.10        | 1.02      | 1.03        | 1.09       | 1.05         | 1.47       | 1.27         | 1.38       | 1.41         |
| SYNGR3   | synaptogyrin 3                                            | chr16p13             | positive regulation of transporter activity | ---     | -1.40         | -1.05           | 1.05      | 1.23        | 1.46      | 1.60        | 1.04       | 1.16         | 2.26       | 1.85         | 2.37       | 2.45         |
| SYNJ1    | synaptotagmin 1                                           | chr21q22.2           | phospholipid metabolic process              | ---     | 1.03          | 1.10            | -1.03     | -1.01       | 1.03      | 1.02        | -1.33      | -1.07        | -1.56      | -1.31        | -1.13      | -1.22        |
| SYNJ1    | synaptotagmin 1                                           | chr21q22.2           | phospholipid metabolic process              | ---     | 1.13          | 1.06            | -1.19     | 1.44        | 1.10      | -1.23       | -2.07      | 1.02         | 4.17       | 2.30         | 1.19       | 1.56         |
| SYNJ2    | synaptotagmin 2                                           | chr6q25.3            | phospholipid metabolic process              | ---     | -1.11         | -1.16           | 1.02      | 1.02        | 1.02      | -1.17       | 1.24       | -1.76        | -1.54      | -1.41        | -1.12      | -1.12        |
| SYNJ2    | synaptotagmin 2                                           | chr6q25.3            | phospholipid metabolic process              | ---     | -1.07         | -1.10           | 1.10      | -1.08       | -1.02     | -1.04       | 1.05       | -1.06        | -1.88      | -1.63        | -1.45      | -1.31        |
| SYNJ2    | synaptotagmin 2                                           | chr6q25.3            | phospholipid metabolic process              | ---     | 1.04          | 1.07            | 1.13      | -1.02       | 1.01      | 1.06        | 1.00       | -1.02        | -2.04      | -1.55        | -1.77      | -1.74        |

| ID      | Gene Title                                     | Chromosomal Location     | 1st Gene Ontology Biological Process                                 | Pathway                               | A2497 30 mins | A2497P' 30 mins | A2497 2 h | A2497P' 2 h | A2497 4 h | A2497P' 4 h | A2497 24 h | A2497P' 24 h | A2497 48 h | A2497P' 48 h | A2497 72 h | A2497P' 72 h |
|---------|------------------------------------------------|--------------------------|----------------------------------------------------------------------|---------------------------------------|---------------|-----------------|-----------|-------------|-----------|-------------|------------|--------------|------------|--------------|------------|--------------|
| SYNJ2BP | synaptotagmin 2 binding protein                | chr14q24.2               | positive regulation of receptor internalization                      | ---                                   | -1.03         | -1.04           | 1.04      | 1.04        | 1.13      | 1.12        | -1.12      | -1.06        | -1.39      | -1.17        | -1.26      | -1.33        |
| SYNJ2BP | synaptotagmin 2 binding protein                | chr14q24.2 // chr14q24.2 | positive regulation of receptor internalization                      | ---                                   | 1.06          | 1.03            | 1.02      | -1.19       | -1.17     | 1.09        | -1.35      | -1.07        | -1.86      | -1.38        | -1.13      | -1.37        |
| SYNM    | synemin, intermediate filament protein         | chr15q26.3               | intermediate filament cytoskeleton organization                      | ---                                   | -1.01         | 1.10            | -1.01     | -1.06       | -1.02     | -1.11       | -1.02      | -1.02        | -1.67      | -1.44        | -1.21      | -1.18        |
| SYNPO   | synaptopodin                                   | chr5q33.1                | positive regulation of actin filament bundling                       | ---                                   | -1.02         | -1.08           | 1.14      | 1.10        | 1.03      | -1.05       | -1.19      | 1.04         | -1.82      | -1.70        | -1.50      | -1.40        |
| SYNPO   | synaptopodin                                   | chr5q33.1                | positive regulation of actin filament bundling                       | ---                                   | 1.17          | 1.05            | 1.07      | 1.14        | -1.08     | -1.07       | -1.06      | 1.08         | -2.13      | -1.89        | -3.15      | -1.58        |
| SYNPO2  | synaptopodin 2                                 | chr4q26                  | 0                                                                    | ---                                   | -1.04         | -1.54           | -1.04     | 1.67        | 1.17      | 1.19        | -1.67      | -1.55        | -1.78      | -1.42        | -3.41      | -3.67        |
| SYNPO2  | synaptopodin 2                                 | chr4q26                  | 0                                                                    | ---                                   | -3.92         | -3.48           | -2.15     | 1.37        | 2.84      | 2.16        | 6.38       | 4.48         | 5.26       | 10.56        | -4.53      | -3.24        |
| SYNPO2  | synaptopodin 2                                 | chr4q26                  | 0                                                                    | ---                                   | 2.27          | 3.86            | -1.33     | -1.59       | 1.24      | -1.52       | 1.05       | -1.25        | -3.88      | -2.16        | 1.33       | 1.10         |
| SYNPR   | synaptoporin                                   | chr3p14.2                | transport                                                            | ---                                   | 1.25          | 1.17            | 11.39     | 7.76        | 2.09      | -1.49       | 2.69       | 1.20         | -4.04      | -4.04        | 1.42       | 2.83         |
| SYNRG   | synergins, gamma                               | chr17q12                 | transport                                                            | ---                                   | 1.10          | 1.05            | 1.11      | -1.01       | 1.21      | 1.35        | -1.08      | -1.14        | -1.06      | 1.22         | 1.37       | 1.59         |
| SYNRG   | synergins, gamma                               | chr17q12                 | transport                                                            | ---                                   | -4.13         | -2.97           | 1.04      | -1.66       | -1.20     | -3.05       | 17.46      | 3.01         | 3.50       | 2.03         | 1.99       | 1.67         |
| SYNRG   | synergins, gamma                               | chr17q12                 | transport                                                            | ---                                   | -1.03         | 1.08            | 1.10      | 1.05        | -1.05     | 1.00        | -1.07      | 1.26         | -1.82      | -1.58        | -1.64      | -1.80        |
| SYNRG   | synergins, gamma                               | chr17q12                 | transport                                                            | ---                                   | -1.04         | -1.04           | 1.32      | 1.04        | 1.23      | 1.07        | 1.14       | 1.14         | -1.79      | -1.47        | -1.64      | -1.62        |
| SYNRG   | synergins, gamma                               | chr17q12                 | transport                                                            | ---                                   | 1.00          | 1.08            | 1.11      | 1.11        | -1.04     | -1.27       | 1.34       | 1.07         | -1.56      | -2.38        | -1.90      | -1.94        |
| SYNRG   | synergins, gamma                               | chr17q12                 | transport                                                            | ---                                   | -1.13         | -1.08           | 1.02      | -1.00       | -1.01     | -1.06       | -1.07      | -1.07        | -1.17      | -1.06        | 1.31       | 1.39         |
| SYT     | synaptophysin                                  | chrXp11.23-p11.22        | transport                                                            | ---                                   | 1.16          | 1.75            | 1.63      | 1.42        | 1.49      | 1.23        | 1.03       | 1.32         | -1.90      | -2.09        | -2.75      | -1.30        |
| SYPL1   | synaptophysin-like 1                           | chr7q22.3                | transport                                                            | ---                                   | 1.17          | 1.08            | -1.07     | -1.13       | -1.04     | -1.08       | -1.11      | -1.08        | -1.27      | -1.12        | -1.23      | -1.63        |
| SYPL1   | synaptophysin-like 1                           | chr7q22.3                | transport                                                            | ---                                   | 1.02          | 1.01            | 1.11      | 1.03        | 1.07      | 1.08        | 1.14       | -1.06        | 1.30       | 1.18         | 1.39       | 1.47         |
| SYPL2   | synaptophysin-like 2                           | chr1p13.3                | transport                                                            | ---                                   | -1.02         | 1.05            | -1.42     | -1.77       | 1.41      | -1.14       | -1.90      | -1.76        | -3.65      | -1.61        | -1.87      | -1.65        |
| SYS1    | SYS1 Golgi-localized integral membrane protein | chr20q13.12              | transport                                                            | ---                                   | -1.09         | -1.06           | -1.02     | -1.02       | 1.17      | -1.04       | 1.14       | 1.01         | 1.18       | 1.10         | 1.23       | 1.36         |
| SYT11   | synaptotagmin XI                               | chr1q21.2                | transport                                                            | ---                                   | -1.15         | -1.20           | 1.14      | 1.17        | 1.13      | -1.01       | -1.04      | -1.21        | -1.70      | -1.37        | -1.52      | -1.59        |
| SYT12   | synaptotagmin XII                              | chr1q13.2                | transport                                                            | ---                                   | 1.37          | -1.08           | -1.12     | 1.11        | -1.24     | -1.02       | -1.03      | 1.39         | -3.24      | -1.71        | -1.96      | 1.00         |
| SYT12   | synaptotagmin XII                              | chr1q13.2                | 0                                                                    | ---                                   | 1.13          | 1.23            | 1.10      | -1.16       | 1.05      | -1.15       | 1.31       | 1.74         | -1.27      | -1.24        | -2.01      | -2.17        |
| SYT15   | synaptotagmin XV                               | chr10q11.1               | 0                                                                    | ---                                   | 1.12          | 1.33            | 1.17      | -1.11       | -1.04     | 1.11        | 1.00       | 1.07         | 1.75       | 1.67         | 2.29       | 2.05         |
| SYT17   | synaptotagmin XVII                             | chr16p12.3               | transport                                                            | ---                                   | 1.22          | 1.12            | 1.10      | 1.17        | -1.09     | -1.21       | 1.31       | 1.18         | 1.40       | 1.35         | 1.56       | 2.21         |
| SYT17   | synaptotagmin XVII                             | chr16p12.3               | transport                                                            | ---                                   | -1.03         | -1.13           | 1.24      | -1.05       | -1.14     | -1.49       | 1.20       | 1.08         | 1.16       | 1.60         | 1.24       | 1.81         |
| SYT6    | synaptotagmin VI                               | chr1p13.2                | transport                                                            | ---                                   | 1.52          | 1.08            | 1.10      | 1.20        | 1.34      | 1.23        | -1.01      | -1.02        | 2.13       | 1.63         | 1.89       | 1.42         |
| SYT7    | synaptotagmin VII                              | chr1q12-q13.1            | plasma membrane repair                                               | ---                                   | 1.15          | 1.74            | -3.54     | -1.80       | -2.05     | -1.03       | -1.90      | 1.21         | -1.34      | 2.06         | 4.41       | 4.41         |
| SYTL2   | synaptotagmin-like 2                           | chr1q14                  | transport                                                            | ---                                   | 2.28          | 2.56            | -3.23     | -1.04       | -1.38     | 1.21        | -1.20      | -7.00        | -2.63      | -1.54        | -2.74      | 3.46         |
| SYTL2   | synaptotagmin-like 2                           | chr1q14                  | transport                                                            | ---                                   | -1.41         | -1.01           | 1.42      | -1.18       | 1.09      | 1.69        | 1.11       | 1.28         | 10.95      | 18.73        | 2.10       | 2.93         |
| SYTL3   | synaptotagmin-like 3                           | chr6q25.3                | intracellular protein transport                                      | ---                                   | 1.24          | 1.02            | 1.35      | -1.02       | -1.11     | -1.18       | 1.12       | -1.48        | 1.63       | 1.17         | 1.91       | 1.41         |
| SYTL4   | synaptotagmin-like 4                           | chrXq21.33               | transport                                                            | ---                                   | -1.35         | -1.73           | 1.56      | -1.17       | -1.48     | -1.40       | -1.14      | 1.24         | -1.36      | -1.25        | -1.70      | -1.97        |
| SYTL4   | synaptotagmin-like 4                           | chrXq21.33               | transport                                                            | ---                                   | -1.01         | -1.05           | 1.13      | 1.24        | -1.01     | -1.01       | 1.16       | 1.16         | 1.09       | 1.02         | -1.19      | -1.27        |
| SYTL5   | synaptotagmin-like 5                           | chrXp21.1                | intracellular protein transport                                      | ---                                   | -1.14         | -1.07           | 1.12      | -1.00       | 1.00      | -1.10       | -1.10      | -1.00        | -2.09      | -1.31        | -2.01      | -1.48        |
| SZRD1   | SUZ RNA binding domain                         | chr1p36.13               | 0                                                                    | ---                                   | -1.08         | -1.14           | -1.08     | -1.04       | 1.22      | 1.09        | 1.18       | 1.02         | 1.36       | 1.02         | 1.14       | 1.09         |
| SZRD1   | SUZ RNA binding domain                         | chr1p36.13               | 0                                                                    | ---                                   | -1.05         | -1.08           | 1.03      | 1.06        | 1.01      | -1.02       | 1.09       | -1.03        | 1.26       | 1.16         | 1.09       | 1.07         |
| SZT2    | seizure threshold 2 homolog                    | chr1p34.2                | central nervous system development                                   | ---                                   | -1.05         | -1.28           | -1.07     | 1.14        | -1.18     | -1.02       | 1.04       | 1.26         | -1.75      | -1.26        | -2.01      | -1.57        |
| SZT2    | seizure threshold 2 homolog                    | chr1p34.2                | central nervous system development                                   | ---                                   | 1.09          | -1.07           | 1.01      | 1.50        | -1.06     | -1.17       | 1.51       | 1.27         | -1.72      | -1.70        | -2.25      | -2.13        |
| TAB3    | TGF-beta activated kinase                      | chrXp21.2                | activation of MAPK activity                                          | ---                                   | 1.86          | 4.06            | -1.24     | -1.07       | 1.70      | 1.13        | 1.02       | -1.64        | 2.00       | 2.94         | -1.42      | -1.01        |
| TAB3    | TGF-beta activated kinase                      | chrXp21.2                | activation of MAPK activity                                          | ---                                   | 1.06          | 1.06            | -1.00     | 1.01        | -1.08     | 1.04        | -1.13      | -1.13        | -1.34      | -1.20        | -1.46      | -1.68        |
| TAC3    | tachykinin 3                                   | chr12q13-q21             | tachykinin receptor signaling pathway                                | ---                                   | -1.37         | 2.01            | -1.17     | -2.86       | 2.61      | 1.27        | 2.56       | 3.71         | 6.28       | 4.29         | 8.74       | 1.60         |
| TACC1   | transforming, acidic coiled-coiled domain      | chr8p11.22               | microtubule cytoskeleton organization                                | ---                                   | -1.06         | -1.33           | -1.06     | 1.12        | 1.03      | 1.09        | -1.21      | -1.03        | -1.63      | -1.43        | -1.86      | -1.53        |
| TACC1   | transforming, acidic coiled-coiled domain      | chr8p11.22               | microtubule cytoskeleton organization                                | ---                                   | 1.05          | 1.11            | 1.10      | -1.03       | -1.02     | -1.07       | -1.08      | -1.08        | -1.77      | -1.74        | -1.70      | -1.95        |
| TACC1   | transforming, acidic coiled-coiled domain      | chr8p11.22               | microtubule cytoskeleton organization                                | ---                                   | -1.13         | -1.07           | -1.08     | -1.08       | -1.02     | -1.02       | -1.76      | -1.38        | -1.63      | -1.17        | -1.53      | -1.39        |
| TACC1   | transforming, acidic coiled-coiled domain      | chr8p11.22               | microtubule cytoskeleton organization                                | ---                                   | -1.01         | 1.28            | 1.29      | 1.04        | -1.06     | -1.17       | 1.23       | -1.11        | -3.52      | -2.72        | -1.66      | -2.91        |
| TACC2   | transforming, acidic coiled-coiled domain      | chr10q26                 | microtubule cytoskeleton organization                                | ---                                   | -1.02         | -1.07           | 1.05      | -1.01       | -1.03     | 1.03        | -1.02      | -1.04        | -1.04      | -1.05        | -1.30      | -1.31        |
| TACC3   | transforming, acidic coiled-coiled domain      | chr4p16.3                | microtubule cytoskeleton organization                                | ---                                   | 1.06          | 1.06            | 1.00      | -1.13       | 1.00      | 1.11        | -1.28      | -1.08        | 1.19       | 1.11         | 1.25       | 1.13         |
| TACR1   | tachykinin receptor 1                          | chr2p12                  | aggressive behavior                                                  | Peptide_GPCRs // GenMAPP              | 1.07          | -1.08           | 1.72      | 1.36        | 1.50      | 1.10        | 1.19       | 1.45         | -1.65      | 1.67         | -1.77      | -1.36        |
| TACSTD2 | tumor-associated calcium signal transducer 2   | chr1p32                  | re-entry into mitotic cell cycle                                     | ---                                   | -1.00         | -1.04           | 1.06      | 1.08        | 1.14      | 1.09        | -1.03      | 1.01         | -1.38      | -1.43        | -1.28      | -1.39        |
| TADA2A  | transcriptional adaptor 2A                     | chr17q12-q21             | regulation of protein phosphorylation                                | ---                                   | 1.12          | 1.09            | 1.02      | -1.18       | -1.03     | 1.14        | -1.42      | -1.21        | -2.92      | -2.33        | -3.60      | -3.12        |
| TADA2A  | transcriptional adaptor 2A                     | chr17q12-q21             | regulation of protein phosphorylation                                | ---                                   | -1.25         | -1.20           | 1.02      | 1.58        | 1.15      | 1.20        | 1.28       | 1.33         | -2.16      | -3.56        | -2.20      | -1.80        |
| TADA2A  | transcriptional adaptor 2A                     | chr17q12-q21             | regulation of protein phosphorylation                                | ---                                   | -1.15         | -1.06           | 1.06      | -1.02       | -1.12     | 1.02        | -1.06      | 1.13         | -1.90      | -2.00        | -1.72      | -1.78        |
| TADA2B  | transcriptional adaptor 2B                     | chr4p16.1                | transcription, DNA-dependent                                         | ---                                   | 1.07          | -1.01           | 1.03      | 1.01        | 1.13      | 1.10        | 1.18       | -1.01        | 1.31       | 1.27         | 1.67       | 1.65         |
| TADA2B  | transcriptional adaptor 2B                     | chr4p16.1                | transcription, DNA-dependent                                         | ---                                   | -1.13         | -1.06           | -1.15     | 1.07        | -1.11     | -1.29       | -1.11      | -1.07        | -1.34      | -1.30        | -1.61      | -1.42        |
| TAF1    | TAF1 RNA polymerase II                         | chrXq13.1                | G1 phase of mitotic cell cycle                                       | ---                                   | -1.20         | -1.10           | 1.06      | -1.03       | 1.10      | -1.07       | -1.12      | 1.05         | -1.50      | -1.07        | -1.42      | -1.40        |
| TAF10   | TAF10 RNA polymerase II                        | chr1p15.3                | transcription, DNA-dependent                                         | ---                                   | 1.00          | 1.02            | -1.02     | 1.05        | -1.01     | -1.11       | 1.18       | 1.13         | 1.60       | 1.25         | 1.24       | 1.20         |
| TAF10   | TAF10 RNA polymerase II                        | chr1p15.3                | transcription, DNA-dependent                                         | ---                                   | -1.24         | -1.06           | 1.03      | 1.17        | 1.06      | -1.21       | 1.37       | 1.16         | -1.22      | -1.19        | -1.73      | -1.76        |
| TAF12   | TAF12 RNA polymerase II                        | chr1p35.3                | transcription, DNA-dependent                                         | RNA_transcription_Reactome // GenMAPP | -1.04         | 1.01            | 1.08      | -1.06       | 1.08      | -1.04       | 1.10       | -1.05        | 1.02       | -1.05        | 1.50       | 1.35         |
| TAF13   | TAF13 RNA polymerase II                        | chr1p13.3                | transcription, DNA-dependent                                         | RNA_transcription_Reactome // GenMAPP | 1.27          | 1.18            | 1.07      | 1.01        | -1.14     | 1.10        | -1.31      | -1.11        | 1.61       | 1.33         | 1.58       | 1.26         |
| TAF13   | TAF13 RNA polymerase II                        | chr1p13.3                | transcription, DNA-dependent                                         | RNA_transcription_Reactome // GenMAPP | 1.16          | 1.28            | 1.15      | 1.46        | -1.06     | -1.20       | 1.66       | 2.65         | 1.60       | 1.14         | 2.19       | 2.35         |
| TAF15   | TAF15 RNA polymerase II                        | chr17q11.1-q11.2         | positive regulation of transcription, DNA-dependent                  | ---                                   | -1.07         | -1.08           | 1.06      | 1.04        | 1.08      | 1.02        | -1.05      | 1.05         | -1.35      | -1.37        | -1.59      | -1.46        |
| TAF15   | TAF15 RNA polymerase II                        | chr17q11.1-q11.2         | positive regulation of transcription, DNA-dependent                  | ---                                   | 2.18          | 1.17            | 1.22      | 1.10        | -1.26     | 1.15        | -1.43      | -1.17        | -3.14      | -1.98        | -2.42      | -2.52        |
| TAF15   | TAF15 RNA polymerase II                        | chr17q11.1-q11.2         | positive regulation of transcription, DNA-dependent                  | ---                                   | 1.27          | 1.01            | -1.02     | -1.07       | 1.01      | 1.07        | 1.03       | -1.11        | -1.81      | -1.56        | -1.85      | -1.71        |
| TAF1A   | TATA box binding protein                       | chr1q42                  | transcription, DNA-dependent                                         | ---                                   | 1.44          | 1.42            | -1.12     | 1.02        | -1.18     | -1.13       | 1.25       | 1.14         | 1.41       | 1.13         | 1.51       | 1.15         |
| TAF3    | TAF3 RNA polymerase II                         | chr10p15.1               | negative regulation of transcription from RNA polymerase II promoter | ---                                   | 1.19          | 1.05            | -1.03     | 1.10        | 1.03      | -1.04       | -1.14      | 1.06         | -1.05      | -1.11        | 1.23       | 1.46         |
| TAF4B   | TAF4B RNA polymerase II                        | chr18q11.2               | transcription, DNA-dependent                                         | ---                                   | 1.34          | 1.65            | 1.03      | -1.58       | -1.04     | -1.22       | -1.02      | -1.57        | 1.13       | 1.37         | 2.42       | 2.03         |

| ID        | Gene Title                                        | Chromosomal Location | 1st Gene Ontology Biological Process                           | Pathway                               | A2497 30 mins | A2497P' 30 mins | A2497 2 h | A2497P' 2 h | A2497 4 h | A2497P' 4 h | A2497 24 h | A2497P' 24 h | A2497 48 h | A2497P' 48 h | A2497 72 h | A2497P' 72 h |
|-----------|---------------------------------------------------|----------------------|----------------------------------------------------------------|---------------------------------------|---------------|-----------------|-----------|-------------|-----------|-------------|------------|--------------|------------|--------------|------------|--------------|
| TAF5L     | TAF5-like RNA polymerase                          | chr1q42.13           | transcription, DNA-dependent                                   | ---                                   | -1.00         | -1.02           | 1.04      | -1.07       | 1.05      | -1.02       | 1.04       | 1.09         | 1.23       | 1.23         | 1.58       | 1.62         |
| TAF7L     | TAF7-like RNA polymerase                          | chrXq22.1            | transcription, DNA-dependent                                   | ---                                   | 1.00          | 1.10            | 1.19      | 1.07        | 1.01      | -1.00       | -1.13      | -1.21        | -1.77      | -1.65        | -3.40      | -3.69        |
| TAF7L     | TAF7-like RNA polymerase                          | chrXq22.1            | transcription, DNA-dependent                                   | ---                                   | 1.10          | -1.37           | 1.18      | -1.02       | 1.01      | -1.11       | -1.39      | 1.01         | -2.07      | -1.42        | -3.43      | -3.25        |
| TAF8      | TAF8 RNA polymerase II                            | chr6p21.1            | inner cell mass cell proliferation                             | ---                                   | -1.32         | -1.03           | 1.03      | 1.25        | 1.08      | -1.03       | 1.34       | 1.26         | 1.65       | 1.67         | 1.70       | 1.57         |
| TAF9      | TAF9 RNA polymerase II                            | chr5q11.2-q13.1      | transcription, DNA-dependent                                   | RNA_transcription_Reactome // GenMAPP | -1.04         | -1.01           | -1.03     | -1.02       | 1.04      | -1.02       | 1.02       | -1.06        | 1.02       | -1.02        | -1.04      | -1.11        |
| TAF9      | TAF9 RNA polymerase II                            | chr5q11.2-q13.1      | transcription, DNA-dependent                                   | RNA_transcription_Reactome // GenMAPP | -1.09         | -1.00           | 1.03      | -1.07       | 1.20      | -1.07       | 1.19       | 1.00         | 1.67       | 1.54         | 1.63       | 1.46         |
| TAF9B     | TAF9B RNA polymerase II                           | chrXq13.1-q21.1      | negative regulation of transcription from                      | ---                                   | 1.06          | 1.00            | -1.01     | 1.11        | -1.04     | 1.02        | -1.15      | -1.14        | -1.94      | -1.62        | -5.50      | -4.90        |
| TAF9B     | TAF9B RNA polymerase II                           | chrXq13.1-q21.1      | negative regulation of transcription from                      | ---                                   | -1.09         | -1.02           | 1.19      | -1.52       | -1.05     | -1.32       | -1.40      | -1.35        | 2.05       | 2.45         | 2.26       | 3.40         |
| TAF9B     | TAF9B RNA polymerase II                           | chrXq13.1-q21.1      | negative regulation of transcription from                      | ---                                   | 1.13          | 1.01            | 1.07      | -1.00       | 1.01      | 1.20        | -1.16      | -1.11        | 1.85       | 2.31         | 1.81       | 2.69         |
| TAF9B     | TAF9B RNA polymerase II                           | chrXq13.1-q21.1      | negative regulation of transcription from                      | ---                                   | 1.10          | -1.08           | 1.05      | 1.00        | 1.16      | -1.05       | 1.01       | -1.01        | 1.01       | 1.57         | -1.07      | 1.24         |
| TAGAP     | T-cell activation RhoGTPase                       | chr6q25.3            | signal transduction                                            | ---                                   | 2.70          | 2.88            | 3.34      | 2.20        | -1.78     | -1.49       | 1.61       | 1.52         | 1.66       | 1.43         | 1.26       | 2.14         |
| TAGLN     | transgelin                                        | chr11q23.2           | muscle organ development                                       | ---                                   | -1.09         | 1.05            | -1.05     | 1.06        | 1.05      | 1.05        | 1.30       | -1.04        | 2.65       | 2.65         | 1.59       | 1.80         |
| TAGLN     | transgelin                                        | chr11q23.2           | muscle organ development                                       | ---                                   | -1.08         | -1.06           | -1.13     | -1.02       | 1.14      | 1.09        | 1.20       | 1.19         | 1.87       | 1.70         | 1.37       | 1.41         |
| TAGLN2    | transgelin 2                                      | chr11q21-q25         | muscle organ development                                       | ---                                   | -1.06         | -1.11           | -1.09     | -1.12       | -1.00     | -1.02       | 1.06       | 1.01         | 1.20       | 1.24         | 1.05       | 1.15         |
| TAMM41    | TAM41, mitochondrial transmembrane protein        | chr3p25.2            | transport                                                      | ---                                   | 1.03          | 1.05            | 1.04      | 1.08        | 1.09      | -1.01       | -1.19      | -1.15        | 1.23       | -1.02        | 1.39       | 1.44         |
| TAMM41    | TAM41, mitochondrial transmembrane protein        | chr3p25.2            | transport                                                      | ---                                   | -1.30         | -1.04           | 1.06      | 1.05        | -1.40     | 1.09        | 1.49       | 1.32         | -1.04      | 1.07         | -1.72      | 1.11         |
| TANC1     | tetratricopeptide repeat, ankyrin domain          | chr2q24.2            | myoblast fusion                                                | ---                                   | 1.23          | 1.14            | 1.06      | 1.02        | 1.02      | 1.15        | -1.05      | -1.02        | -1.31      | -1.26        | -1.27      | -1.57        |
| TANC2     | tetratricopeptide repeat, ankyrin domain          | chr17q23.3           | in utero embryonic development                                 | ---                                   | -1.11         | -1.07           | 1.10      | 1.00        | 1.07      | 1.13        | 1.05       | -1.21        | 1.14       | 1.57         | 1.21       | 1.15         |
| TANGO2    | transport and golgi organization                  | chr22q11.21          | 0                                                              | ---                                   | 1.07          | 1.10            | -1.05     | 1.17        | -1.24     | -1.13       | 1.15       | 1.11         | -1.11      | 1.01         | 1.35       | 1.18         |
| TANK      | TRAF family member-associated protein             | chr2q24-q31          | signal transduction                                            | ---                                   | -1.05         | 1.05            | 1.22      | 1.12        | 1.14      | 1.01        | -1.14      | -1.16        | 1.16       | 1.32         | 1.22       | 1.21         |
| TANK      | TRAF family member-associated protein             | chr2q24-q31          | signal transduction                                            | ---                                   | -1.18         | -1.08           | 1.05      | -1.08       | 1.10      | 1.09        | 1.27       | 1.32         | 1.47       | 1.33         | 1.71       | 1.48         |
| TANK      | TRAF family member-associated protein             | chr2q24-q31          | signal transduction                                            | ---                                   | 1.80          | 2.20            | 1.20      | 1.54        | 1.26      | 1.56        | -1.52      | -1.22        | 1.17       | 1.18         | 1.24       | 1.21         |
| TAKO1     | TAO kinase 1                                      | chr17q11.2           | M phase of mitotic cell cycle                                  | ---                                   | 1.04          | 1.00            | 1.02      | 1.02        | 1.01      | -1.01       | -1.19      | -1.12        | -1.16      | -1.04        | -1.04      | -1.03        |
| TAKO2     | TAO kinase 2                                      | chr16p11.2           | activation of MAPKK activity                                   | ---                                   | 1.85          | 1.34            | -1.43     | -1.05       | -1.16     | -1.10       | -1.38      | 1.04         | -1.10      | -1.09        | -1.85      | -1.27        |
| TAKO2     | TAO kinase 2                                      | chr16p11.2           | activation of MAPKK activity                                   | ---                                   | 1.29          | 1.47            | -1.03     | -1.30       | -1.15     | -1.03       | 1.13       | -1.13        | -2.69      | -2.42        | -1.17      | -1.53        |
| TAP1      | transporter 1, ATP-binding cassette               | chr6p21.3            | positive regulation of T cell mediated cytotoxicity            | ---                                   | 1.01          | 1.03            | -1.01     | 1.04        | 1.15      | 1.01        | 1.19       | 1.06         | 1.64       | 1.24         | 1.64       | 1.74         |
| TAP2      | transporter 2, ATP-binding cassette               | chr6p21.3            | positive regulation of T cell mediated cytotoxicity            | ---                                   | -1.12         | -1.03           | -1.04     | -1.02       | 1.02      | -1.07       | 1.04       | 1.13         | 1.37       | -1.12        | 1.09       | -1.05        |
| TAPBP     | TAP binding protein (tapasin)                     | chr6p21.3            | antigen processing and presentation of peptides                | ---                                   | -1.13         | -1.07           | -1.05     | -1.00       | 1.02      | -1.07       | 1.12       | 1.11         | 1.35       | 1.20         | 1.17       | 1.32         |
| TAPBP     | TAP binding protein (tapasin)                     | chr6p21.3            | antigen processing and presentation of peptides                | ---                                   | -1.34         | -1.11           | 1.08      | -1.06       | -1.33     | -1.01       | 1.39       | 1.04         | 1.23       | 1.38         | 1.67       | 1.60         |
| TAPBP     | TAP binding protein (tapasin)                     | chr6p21.3            | antigen processing and presentation of peptides                | ---                                   | -1.51         | 1.08            | 1.96      | 1.94        | 1.72      | -2.61       | 3.18       | 2.28         | 1.45       | -1.07        | 3.18       | 2.43         |
| TAPBPL    | TAP binding protein-like                          | chr12p13.31          | antigen processing and presentation of peptides                | ---                                   | 1.10          | -1.01           | -1.11     | 1.11        | 1.00      | 1.02        | 1.18       | 1.17         | -1.09      | 1.00         | -1.36      | -1.07        |
| TAPT1     | transmembrane anterior pole protein               | chr4p15.32           | in utero embryonic development                                 | ---                                   | -1.22         | -1.13           | -1.20     | -1.30       | 1.15      | 1.14        | 1.38       | 1.19         | 1.19       | -1.04        | 1.64       | 1.46         |
| TAPT1     | transmembrane anterior pole protein               | chr4p15.32           | in utero embryonic development                                 | ---                                   | -1.10         | -1.03           | 1.11      | 1.02        | 1.04      | -1.03       | 1.06       | -1.10        | -1.19      | 1.07         | 1.14       | 1.14         |
| TAPT1-AS1 | TAPT1 antisense RNA 1                             | (chr4p15.32)         | 0                                                              | ---                                   | 1.44          | 1.48            | -1.16     | 1.07        | 1.03      | 1.19        | 1.02       | 1.06         | -1.95      | -1.94        | -1.86      | -1.58        |
| TARBP1    | TAR (HIV-1) RNA binding protein                   | chr1q42.3            | RNA methylation                                                | ---                                   | 1.22          | 1.23            | 1.05      | -1.08       | -1.02     | -1.05       | -1.15      | -1.03        | -1.66      | -1.73        | -1.61      | -2.06        |
| TARDBP    | TAR DNA binding protein                           | chr1p36.22           | transcription, DNA-dependent                                   | ---                                   | 1.32          | 1.32            | 1.03      | -1.05       | -1.03     | 1.03        | -1.23      | -1.31        | -1.57      | -1.51        | -2.23      | -2.41        |
| TARDBP    | TAR DNA binding protein                           | chr1p36.22           | transcription, DNA-dependent                                   | ---                                   | -1.06         | 1.02            | -1.08     | -1.06       | -1.01     | 1.03        | 1.07       | 1.00         | -1.01      | 1.01         | -1.08      | -1.08        |
| TARP      | TCR gamma alternate reading frame                 | chr7p15-p14          | immune response                                                | ---                                   | 1.67          | 2.80            | 1.47      | 4.82        | 3.94      | 2.40        | 1.10       | 1.20         | -1.67      | -3.24        | -1.03      | 4.65         |
| TARS      | threonyl-tRNA synthetase                          | chr5p13.2            | translation                                                    | ---                                   | -1.08         | 1.01            | -1.06     | -1.05       | -1.01     | -1.04       | 1.05       | 1.06         | 1.19       | 1.07         | 1.03       | 1.01         |
| TARS      | threonyl-tRNA synthetase                          | chr5p13.2            | translation                                                    | ---                                   | 2.71          | 4.12            | 1.29      | 1.15        | 1.48      | 1.13        | 1.36       | -1.72        | 2.07       | 2.74         | 2.42       | 1.30         |
| TARS2     | threonyl-tRNA synthetase                          | chr15q26.3           | translation                                                    | ---                                   | 1.10          | 1.08            | -1.02     | -1.01       | -1.04     | -1.04       | -1.13      | -1.09        | -1.65      | -1.48        | -1.19      | -1.21        |
| TAS2R1    | taste receptor, type 2, member 1                  | chr5p15              | signal transduction                                            | ---                                   | 1.71          | 2.27            | 2.26      | 1.29        | -4.79     | -2.34       | 2.06       | 4.62         | 1.53       | -2.08        | -2.38      | 1.34         |
| TAS2R14   | taste receptor, type 2, member 14                 | chr12p13             | detection of chemical stimulus involved in taste               | ---                                   | -1.04         | -1.11           | -1.20     | 1.03        | -1.05     | 1.14        | -1.17      | -1.02        | -2.00      | -1.95        | -1.28      | -1.66        |
| TASP1     | thymopressin, threonine aspartate                 | chr20p12.1           | proteolysis                                                    | ---                                   | 1.08          | 1.05            | 1.02      | 1.03        | -1.06     | 1.03        | -1.16      | 1.00         | -1.96      | -1.34        | -1.71      | -1.66        |
| TAT       | tyrosine aminotransferase                         | chr16q22.1           | 2-oxoglutarate metabolic process                               | ---                                   | -1.16         | -1.27           | -1.09     | 1.05        | 1.10      | -1.01       | -1.10      | -1.59        | 1.66       | 1.26         | 1.01       | 1.01         |
| TATDN1    | TatD DNase domain containing protein              | chr8q24.13           | apoptotic DNA fragmentation                                    | ---                                   | 1.06          | -1.03           | 1.04      | 1.04        | -1.04     | -1.01       | -1.12      | 1.01         | 1.12       | 1.22         | 1.41       | 1.46         |
| TATDN2    | TatD DNase domain containing protein              | chr3p25.3            | activation of signaling protein activity in response to stress | ---                                   | -1.02         | 1.02            | 1.02      | 1.06        | 1.20      | 1.07        | 1.05       | -1.12        | -1.01      | -1.12        | -1.13      | -1.29        |
| TATDN3    | TatD DNase domain containing protein              | chr1q32.3            | nucleic acid phosphodiester bond hydrolysis                    | ---                                   | 1.20          | 1.25            | -1.00     | -1.01       | 1.04      | -1.01       | -1.14      | -1.05        | -1.66      | -1.65        | -1.33      | -1.52        |
| TAX1BP1   | Tax1 (human T-cell leukemia virus type 1) protein | chr7p15              | apoptotic process                                              | ---                                   | 1.12          | 1.08            | 1.05      | 1.14        | 1.11      | 1.14        | -1.01      | -1.09        | 1.27       | 1.32         | 1.17       | 1.32         |
| TAX1BP1   | Tax1 (human T-cell leukemia virus type 1) protein | chr7p15              | apoptotic process                                              | ---                                   | 1.11          | 1.06            | -1.04     | 1.04        | -1.03     | -1.02       | 1.13       | 1.18         | 1.20       | 1.25         | 1.32       | 1.31         |
| TBC1D1    | TBC1 (tre-2/USP6, BUB2, and CLIP1 domain)         | chr4p14              | cellular membrane organization                                 | ---                                   | -1.03         | 1.00            | 1.07      | -1.01       | -1.07     | -1.17       | 1.02       | 1.04         | 1.20       | 1.26         | 1.30       | 1.15         |
| TBC1D1    | TBC1 (tre-2/USP6, BUB2, and CLIP1 domain)         | chr4p14              | cellular membrane organization                                 | ---                                   | 1.27          | 1.19            | 1.12      | 1.00        | 1.22      | 1.13        | 1.34       | 1.21         | -1.18      | -1.37        | -1.52      | -2.01        |
| TBC1D1    | TBC1 (tre-2/USP6, BUB2, and CLIP1 domain)         | chr4p14              | cellular membrane organization                                 | ---                                   | -1.91         | -2.02           | 2.18      | 1.64        | -1.14     | -1.34       | 1.50       | -1.03        | -1.29      | 1.03         | 1.96       | 1.81         |
| TBC1D10A  | TBC1 domain family, member 10A                    | chr22q12.2           | regulation of Rab GTPase activity                              | ---                                   | -1.23         | 1.29            | 1.03      | 1.08        | 1.14      | 1.15        | 1.68       | 1.27         | 1.70       | 1.65         | 1.57       | 1.87         |
| TBC1D12   | TBC1 domain family, member 12                     | chr10q23.33          | regulation of Rab GTPase activity                              | ---                                   | 1.39          | 1.13            | -1.36     | -1.20       | 1.22      | 1.22        | 2.05       | 1.88         | -1.14      | -1.47        | 1.87       | -1.35        |
| TBC1D15   | TBC1 domain family, member 15                     | chr12q21.1           | regulation of Rab GTPase activity                              | ---                                   | 1.03          | 1.09            | -1.12     | -1.03       | -1.02     | 1.02        | -1.32      | -1.10        | -1.66      | -1.21        | -1.09      | 1.02         |
| TBC1D15   | TBC1 domain family, member 15                     | chr12q21.1           | regulation of Rab GTPase activity                              | ---                                   | -1.05         | -1.05           | 1.04      | 1.04        | -1.07     | 1.02        | -1.06      | -1.03        | -1.08      | -1.01        | 1.36       | 1.39         |
| TBC1D19   | TBC1 domain family, member 19                     | chr4p15.2            | regulation of Rab GTPase activity                              | ---                                   | 1.05          | 1.08            | 1.13      | 1.11        | -1.05     | 1.04        | -1.16      | -1.07        | -1.52      | -1.58        | -2.40      | -2.10        |
| TBC1D2    | TBC1 domain family, member 2                      | chr9q22.33           | regulation of Rab GTPase activity                              | ---                                   | -1.11         | -1.20           | -1.04     | 1.08        | 1.10      | -1.02       | 1.66       | 1.45         | 2.17       | 1.40         | 1.77       | 1.76         |
| TBC1D20   | TBC1 domain family, member 20                     | chr20p13             | virus-host interaction                                         | ---                                   | 1.03          | 1.00            | 1.02      | -1.01       | 1.42      | 1.15        | 1.25       | -1.08        | 1.46       | -1.02        | 1.45       | 1.63         |
| TBC1D22A  | TBC1 domain family, member 22A                    | chr22q13.3           | regulation of Rab GTPase activity                              | ---                                   | 1.12          | 1.16            | 1.15      | 1.33        | -1.06     | 1.02        | 1.06       | 1.12         | -1.14      | 1.04         | -1.45      | -1.31        |
| TBC1D22B  | TBC1 domain family, member 22B                    | chr6p21.2            | 0                                                              | ---                                   | 1.25          | -1.63           | 1.51      | 1.16        | -1.01     | -1.25       | 1.42       | 1.58         | -1.51      | -1.10        | -2.48      | -1.13        |
| TBC1D23   | TBC1 domain family, member 23                     | chr3q12.2            | regulation of Rab GTPase activity                              | ---                                   | 1.06          | 1.01            | 1.01      | -1.08       | -1.04     | -1.06       | -1.04      | -1.03        | -1.08      | 1.04         | 1.34       | 1.32         |
| TBC1D24   | TBC1 domain family, member 24                     | chr16p13.3           | neuron projection development                                  | ---                                   | 1.16          | 1.11            | 1.62      | 1.43        | -1.12     | 1.13        | 1.18       | -1.19        | -1.05      | -1.09        | -1.62      | -2.23        |
| TBC1D25   | TBC1 domain family, member 25                     | chrXp11.23           | autophagy                                                      | ---                                   | -1.04         | -1.04           | 1.00      | -1.14       | 1.10      | -1.05       | 1.41       | 1.21         | 1.32       | -1.02        | 1.23       | 1.19         |
| TBC1D2B   | TBC1 domain family, member 2B                     | chr15q24.3-q25.1     | regulation of Rab GTPase activity                              | ---                                   | -1.02         | -1.06           | 1.16      | 1.30        | 1.03      | 1.01        | -1.09      | -1.11        | -1.70      | -1.68        | -1.53      | -1.34        |

| ID       | Gene Title                     | Chromosomal Location | 1st Gene Ontology Biological Process      | Pathway                                   | A2497 30 mins | A2497P' 30 mins | A2497 2 h | A2497P' 2 h | A2497 4 h | A2497P' 4 h | A2497 24 h | A2497P' 24 h | A2497 48 h | A2497P' 48 h | A2497 72 h | A2497P' 72 h |
|----------|--------------------------------|----------------------|-------------------------------------------|-------------------------------------------|---------------|-----------------|-----------|-------------|-----------|-------------|------------|--------------|------------|--------------|------------|--------------|
| TBC1D30  | TBC1 domain family, mem        | chr12q14.3           | regulation of Rab GTPase activity         | ---                                       | -1.11         | -1.15           | -1.18     | 1.01        | 1.30      | 1.20        | -1.22      | -1.04        | -1.61      | -1.57        | -3.15      | -2.42        |
| TBC1D30  | TBC1 domain family, mem        | chr12q14.3           | regulation of Rab GTPase activity         | ---                                       | 1.13          | -1.05           | 1.12      | 1.25        | 1.25      | 1.52        | -1.03      | 1.05         | -1.23      | -1.16        | -1.33      | -2.12        |
| TBC1D4   | TBC1 domain family, mem        | chr13q22.2           | cellular membrane organization            | ---                                       | 1.09          | 1.15            | 1.07      | -1.08       | -1.06     | -1.03       | -1.13      | -1.09        | -1.58      | -1.41        | -1.23      | -1.39        |
| TBC1D5   | TBC1 domain family, mem        | chr3p24.3            | regulation of Rab GTPase activity         | ---                                       | 1.10          | 1.09            | -1.11     | -1.13       | -1.06     | 1.04        | -1.12      | -1.24        | -1.71      | -1.44        | -1.60      | -1.59        |
| TBC1D5   | TBC1 domain family, mem        | chr3p24.3            | regulation of Rab GTPase activity         | ---                                       | -1.07         | -1.07           | 1.22      | 1.04        | 1.02      | -1.21       | -1.15      | -1.18        | -2.15      | -1.32        | -1.65      | -1.31        |
| TBC1D8B  | TBC1 domain family, mem        | chrXq22.3            | regulation of Rab GTPase activity         | ---                                       | -1.25         | -1.39           | -1.15     | -1.43       | -1.54     | -1.49       | -1.16      | 1.55         | -1.11      | 1.22         | 1.64       | 1.91         |
| TBC1D9B  | TBC1 domain family, mem        | chr5q35.3            | regulation of Rab GTPase activity         | ---                                       | 1.02          | 1.03            | 1.11      | 1.20        | 1.21      | 1.07        | 1.07       | 1.09         | 1.22       | 1.33         | 1.03       | 1.25         |
| TBC1D9B  | TBC1 domain family, mem        | chr5q35.3            | regulation of Rab GTPase activity         | ---                                       | 1.22          | 1.19            | 1.13      | 1.18        | 1.13      | 1.04        | 1.14       | 1.08         | 1.33       | 1.35         | 1.19       | 1.14         |
| TBC1D9B  | TBC1 domain family, mem        | chr5q35.3            | regulation of Rab GTPase activity         | ---                                       | 1.07          | -1.04           | -1.01     | -1.02       | 1.09      | -1.00       | 1.08       | 1.06         | 1.15       | 1.29         | 1.20       | 1.20         |
| TBC1D9B  | TBC1 domain family, mem        | chr5q35.3            | regulation of Rab GTPase activity         | ---                                       | 1.35          | 1.25            | 1.02      | 1.15        | -1.09     | -1.21       | 1.04       | 1.07         | 1.45       | 1.51         | 1.09       | 1.21         |
| TBCB     | tubulin folding cofactor B     | chr19q13.11-q13.12   | multicellular organismal development      | ---                                       | -1.02         | -1.04           | -1.09     | -1.03       | -1.05     | -1.08       | -1.10      | -1.06        | 1.07       | 1.09         | -1.45      | -1.54        |
| TBCB     | tubulin folding cofactor B     | chr19q13.11-q13.12   | multicellular organismal development      | ---                                       | 1.03          | 1.01            | -1.03     | -1.00       | -1.05     | -1.08       | 1.04       | -1.03        | 1.09       | 1.18         | -1.41      | -1.46        |
| TBCB     | tubulin folding cofactor B     | chr19q13.11-q13.12   | multicellular organismal development      | ---                                       | -1.03         | -1.03           | 1.01      | -1.01       | 1.00      | -1.04       | 1.04       | -1.05        | 1.11       | 1.02         | -1.44      | -1.41        |
| TBCCD1   | TBCD domain containing         | chr3q27.3            | cell morphogenesis                        | ---                                       | 1.07          | 1.07            | -1.01     | -1.07       | -1.04     | 1.12        | -1.28      | -1.14        | -1.39      | -1.19        | -1.40      | -1.49        |
| TBCD     | tubulin folding cofactor D     | chr17q25.3           | protein folding                           | ---                                       | 1.04          | -1.01           | 1.07      | 1.27        | 1.04      | -1.13       | 1.22       | 1.23         | 1.11       | -1.02        | -2.09      | -1.64        |
| TBCD     | tubulin folding cofactor D     | chr17q25.3           | protein folding                           | ---                                       | -1.18         | -1.33           | -1.01     | 1.08        | -1.19     | -1.37       | 1.10       | 1.03         | -1.16      | -1.34        | -2.68      | -2.20        |
| TBCD     | tubulin folding cofactor D     | chr17q25.3           | protein folding                           | ---                                       | -1.00         | -1.09           | 1.15      | 1.46        | 1.22      | -1.14       | 1.02       | 1.24         | -1.21      | -1.40        | -1.64      | -1.30        |
| TBCE     | tubulin folding cofactor E     | chr1q42.3            | microtubule cytoskeleton organization     | ---                                       | 1.03          | -1.00           | 1.07      | 1.13        | 1.12      | -1.03       | 1.14       | 1.12         | -1.12      | -1.29        | -1.02      | -1.00        |
| TBCEL    | tubulin folding cofactor E     | chr11q23.3           | 0                                         | ---                                       | 1.34          | 1.20            | 1.05      | 1.19        | 1.25      | 1.25        | -1.37      | -1.05        | -2.94      | -1.94        | -1.54      | -2.11        |
| TBCEL    | tubulin folding cofactor E     | chr11q23.3           | 0                                         | ---                                       | 1.18          | 1.03            | 1.16      | -1.00       | -1.05     | -1.01       | -1.07      | -1.09        | -2.10      | -2.17        | -1.45      | -1.62        |
| TBCK     | TBC1 domain containing         | chr4q24              | protein phosphorylation                   | ---                                       | 1.06          | -1.02           | 1.07      | 1.10        | 1.03      | -1.03       | -1.02      | 1.08         | -2.34      | -1.80        | -4.75      | -3.53        |
| TBKBP1   | TBK1 binding protein 1         | chr17q21.32          | innate immune response                    | ---                                       | 1.21          | -1.17           | 1.64      | 1.48        | -1.32     | -1.66       | 1.02       | 1.16         | 1.51       | 1.36         | 1.69       | 1.57         |
| TBL1X    | transducin (beta)-like 1X-like | chrXp22.3            | negative regulation of transcription from | ---                                       | -1.13         | -1.17           | 1.01      | -1.01       | 1.10      | 1.03        | -1.15      | -1.07        | -1.13      | -1.10        | -1.29      | -1.12        |
| TBL1X    | transducin (beta)-like 1X-like | chrXp22.3            | negative regulation of transcription from | ---                                       | -1.02         | -1.02           | 1.08      | -1.05       | 1.09      | 1.03        | -1.20      | -1.08        | -1.53      | -1.31        | -1.59      | -1.37        |
| TBL1X    | transducin (beta)-like 1X-like | chrXp22.3            | negative regulation of transcription from | ---                                       | -1.05         | -1.08           | 1.06      | -1.00       | 1.03      | 1.03        | -1.16      | -1.09        | -1.33      | -1.18        | -1.49      | -1.25        |
| TBL1X    | transducin (beta)-like 1X-like | chrXp22.3            | negative regulation of transcription from | ---                                       | -1.05         | 1.01            | 1.07      | -1.05       | 1.05      | -1.07       | -1.03      | 1.02         | -1.12      | -1.31        | -1.51      | -1.36        |
| TBL1XR1  | transducin (beta)-like 1X-like | chr3q26.32           | negative regulation of transcription from | ---                                       | 1.27          | 1.35            | -1.04     | -1.18       | -1.16     | 1.15        | -1.98      | -1.65        | -1.46      | -1.24        | -1.97      | -3.02        |
| TBL1XR1  | transducin (beta)-like 1X-like | chr3q26.32           | negative regulation of transcription from | ---                                       | -1.10         | -1.02           | -1.04     | -1.01       | -1.03     | -1.03       | -1.11      | -1.01        | -1.11      | -1.02        | -1.22      | -1.26        |
| TBL2     | transducin (beta)-like 2       | chr7q11.23           | 0                                         | ---                                       | -1.01         | -1.02           | 1.13      | -1.39       | 2.03      | 1.72        | -1.10      | -1.16        | -1.05      | 1.21         | 1.94       | 2.58         |
| TBL2     | transducin (beta)-like 2       | chr7q11.23           | 0                                         | ---                                       | 1.03          | -1.08           | -1.08     | -1.02       | -1.07     | 1.03        | -1.09      | 1.06         | 1.10       | 1.18         | 1.21       | 1.36         |
| TBL3     | transducin (beta)-like 3       | chr16p13.3           | rRNA processing                           | ---                                       | 3.52          | 2.92            | -1.29     | -1.38       | 1.85      | 2.74        | -1.95      | -1.46        | -6.75      | -1.88        | -2.98      | -3.69        |
| TBRG1    | transforming growth factor     | chr11q24.2           | DNA replication                           | ---                                       | -1.02         | 1.01            | 1.09      | -1.03       | 1.02      | -1.01       | -1.15      | 1.01         | 1.32       | 1.26         | 2.08       | 1.82         |
| TBRG1    | transforming growth factor     | chr11q24.2           | DNA replication                           | ---                                       | 1.20          | 1.05            | -1.06     | 1.01        | 1.05      | 1.18        | -1.07      | 1.02         | -1.38      | -1.31        | -2.07      | -1.85        |
| TBRG1    | transforming growth factor     | chr11q24.2           | DNA replication                           | ---                                       | 1.23          | 1.10            | -1.02     | 1.14        | 1.13      | 1.24        | 1.07       | 1.02         | -1.62      | -1.56        | -2.11      | -1.70        |
| TBRG4    | transforming growth factor     | chr7p13              | G1 phase of mitotic cell cycle            | ---                                       | -1.11         | -1.27           | -1.00     | 1.16        | 1.16      | 1.32        | -1.26      | -1.14        | -2.29      | -2.78        | -1.54      | -1.72        |
| TBX1     | T-box 1                        | chr22q11.21          | angiogenesis                              | ---                                       | 1.73          | 1.51            | -1.14     | -1.05       | -1.14     | 1.39        | 1.12       | 1.10         | -1.17      | 1.13         | -2.19      | -2.20        |
| TBX15    | T-box 15                       | chr1p11.1            | negative regulation of transcription from | ---                                       | -1.03         | -1.02           | -1.15     | -1.32       | -1.35     | -1.39       | -1.07      | 1.01         | 1.07       | -1.01        | -1.76      | -1.73        |
| TBX3     | T-box 3                        | chr12q24.1           | negative regulation of transcription from | ---                                       | 1.27          | 1.12            | -1.03     | -1.08       | -1.06     | 1.12        | -1.25      | 1.06         | -1.53      | -1.31        | -1.10      | -1.29        |
| TBX3     | T-box 3                        | chr12q24.1           | negative regulation of transcription from | ---                                       | 1.09          | 1.08            | -1.04     | 1.05        | -1.10     | 1.10        | -1.33      | -1.19        | -1.37      | -1.46        | -1.13      | -1.25        |
| TBX5-AS1 | TBX5 antisense RNA 1           | chr12q24.21          | 0                                         | ---                                       | 1.28          | -1.94           | 1.34      | 1.90        | 3.89      | 3.09        | 4.53       | 8.65         | 6.04       | 5.92         | 2.95       |              |
| TBX6     | T-box 6                        | chr16p11.2           | negative regulation of transcription from | ---                                       | 1.19          | 1.71            | 4.03      | -1.13       | 1.54      | 1.38        | 1.14       | -1.58        | -1.79      | -1.56        | 1.36       | 2.55         |
| TBXA2R   | thromboxane A2 receptor        | chr19p13.3           | inflammatory response                     | GPCRDB_Class_A_Rhodopsin-like // GenM     | 1.06          | 1.00            | -1.13     | -1.06       | 1.06      | 1.13        | 1.35       | 1.25         | 1.67       | 1.26         | 1.41       | 1.11         |
| TBXA2R   | thromboxane A2 receptor        | chr19p13.3           | inflammatory response                     | GPCRDB_Class_A_Rhodopsin-like // GenM     | 1.04          | -1.09           | -1.10     | -1.09       | 1.12      | 1.12        | 1.22       | 1.19         | 1.48       | 1.20         | 1.29       | 1.10         |
| TBXAS1   | thromboxane A synthase 1       | chr7q34-q35          | prostaglandin biosynthetic process        | Eicosanoid_Synthesis // GenMAPP // Prosta | 1.21          | 1.83            | 1.64      | 1.08        | -1.59     | -2.05       | -5.22      | -1.04        | 1.10       | -1.67        | -1.71      | 1.07         |
| TC2N     | tandem C2 domains, nucle       | chr14q32.12          | 0                                         | ---                                       | 1.11          | -1.03           | -1.17     | -1.05       | -2.45     | 1.51        | -3.18      | 1.67         | 1.31       | 1.73         | 1.36       | 1.01         |
| TC2N     | tandem C2 domains, nucle       | chr14q32.12          | 0                                         | ---                                       | 1.97          | 1.59            | -1.04     | 1.11        | -1.09     | 1.14        | -1.07      | 1.20         | 1.56       | 1.77         | 1.18       | -1.09        |
| TC2N     | tandem C2 domains, nucle       | chr14q32.12          | 0                                         | ---                                       | 1.00          | -1.00           | 1.10      | 1.08        | 1.13      | -1.05       | 1.26       | 1.12         | 2.24       | 2.15         | 1.91       | 1.89         |
| TCAIM    | T cell activation inhibitor,   | chr3p21.31           | 0                                         | ---                                       | 1.15          | 1.17            | -1.08     | -1.19       | 1.00      | -1.03       | 1.02       | -1.30        | -2.33      | -1.77        | -1.26      | -1.99        |
| TCAIM    | T cell activation inhibitor,   | chr3p21.31           | 0                                         | ---                                       | 1.03          | -1.08           | -1.02     | -1.46       | -1.27     | 1.41        | -1.55      | -1.00        | -1.09      | 1.54         | 1.52       | 1.50         |
| TCEA1    | transcription elongation fac   | chr8q11.2            | DNA repair                                | ---                                       | 1.06          | 1.06            | 1.01      | -1.11       | -1.04     | 1.05        | -1.01      | -1.06        | -1.24      | -1.05        | -1.24      | -1.34        |
| TCEA1    | transcription elongation fac   | chrXq22.1            | negative regulation of transcription from | ---                                       | 1.26          | 1.13            | -1.03     | -1.14       | -1.14     | -1.12       | -1.45      | -1.16        | -1.91      | -1.84        | -1.35      | -1.48        |
| TCEAL3   | transcription elongation fac   | chrXq22.2            | transcription, DNA-dependent              | ---                                       | 1.10          | -1.03           | 1.06      | 1.06        | -1.02     | -1.10       | 1.06       | 1.34         | 1.33       | 1.22         | 1.53       | 1.54         |
| TCEAL4   | transcription elongation fac   | chrXq22.2            | transcription, DNA-dependent              | ---                                       | 1.03          | 1.01            | 1.01      | 1.09        | 1.10      | 1.02        | 1.09       | 1.04         | 1.04       | -1.03        | -1.28      | -1.19        |
| TCEANC   | transcription elongation fac   | chrXq22.2            | transcription, DNA-dependent              | ---                                       | 1.09          | 1.11            | -1.12     | 1.30        | -1.29     | -1.07       | -1.13      | -1.65        | -2.57      | -1.86        | -1.98      | -2.65        |
| TCEANC2  | transcription elongation fac   | chr1p32.3            | transcription, DNA-dependent              | ---                                       | -1.13         | -1.29           | 1.06      | 1.09        | 1.08      | -1.12       | -1.20      | -1.36        | 1.04       | 1.02         | -1.50      | -1.10        |
| TCEB1    | transcription elongation fac   | chr8q21.11           | transcription, DNA-dependent              | ---                                       | -1.04         | 1.01            | -1.01     | -1.04       | 1.03      | -1.09       | 1.03       | -1.03        | 1.50       | 1.27         | 1.48       | 1.48         |
| TCEB2    | transcription elongation fac   | chr16p12.3           | transcription, DNA-dependent              | ---                                       | 1.00          | -1.08           | 1.18      | 1.11        | -1.07     | -1.13       | -1.09      | 1.03         | -1.11      | -1.31        | -1.41      | -1.61        |
| TCERGIL  | transcription elongation reg   | chr10q26.3           | 0                                         | ---                                       | 1.88          | 2.50            | -1.12     | -2.06       | -1.15     | -1.59       | -1.77      | -1.11        | -3.65      | -2.77        | 3.31       | 2.51         |
| TCF12    | transcription factor 12        | chr15q21             | transcription, DNA-dependent              | ---                                       | 1.26          | 1.11            | -1.03     | 1.05        | -1.09     | 1.09        | 1.07       | -1.10        | -1.03      | 1.00         | -1.11      | -1.11        |
| TCF12    | transcription factor 12        | chr15q21             | transcription, DNA-dependent              | ---                                       | 1.02          | 1.08            | 1.32      | 1.31        | 1.39      | 1.14        | 1.06       | 1.01         | -3.05      | -2.68        | -2.75      | -3.11        |
| TCF19    | transcription factor 19        | chr6p21.3            | transcription, DNA-dependent              | ---                                       | -1.03         | -1.08           | 1.04      | 1.03        | -1.02     | -1.04       | 1.09       | 1.02         | 1.08       | 1.23         | -1.42      | 1.06         |
| TCF20    | transcription factor 20 (AR    | chr22q13.3/22q13.3   | transcription, DNA-dependent              | Matrix_Metalloproteinases // GenMAPP      | 1.03          | 1.00            | 1.03      | -1.09       | 1.09      | -1.11       | 1.32       | 1.06         | 1.32       | 1.11         | 1.46       | 1.23         |
| TCF25    | transcription factor 25 (bas   | chr16q24.3           | negative regulation of transcription from | ---                                       | -1.02         | -1.05           | 1.02      | 1.10        | 1.00      | -1.03       | 1.09       | 1.12         | -1.26      | -1.30        | -1.97      | -1.58        |
| TCF25    | transcription factor 25 (bas   | chr16q24.3           | negative regulation of transcription from | ---                                       | -1.06         | -1.03           | 1.04      | 1.15        | 1.14      | -1.01       | 1.08       | 1.14         | -1.31      | -1.49        | -1.92      | -1.45        |
| TCF25    | transcription factor 25 (bas   | chr16q24.3           | negative regulation of transcription from | ---                                       | -1.00         | -1.01           | 1.15      | 1.39        | -1.16     | -1.17       | 1.45       | 1.25         | 2.04       | 2.06         | 1.82       | 1.54         |
| TCF3     | transcription factor 3         | chr19p13.3           | G1 phase of mitotic cell cycle            | ---                                       | -1.01         | -1.02           | -1.03     | 1.17        | -1.04     | -1.18       | 1.11       | -1.04        | 1.05       | -1.04        | 1.34       | 1.16         |

| ID       | Gene Title                       | Chromosomal Location | 1st Gene Ontology Biological Process             | Pathway | A2497 30 mins | A2497P' 30 mins | A2497 2 h | A2497P' 2 h | A2497 4 h | A2497P' 4 h | A2497 24 h | A2497P' 24 h | A2497 48 h | A2497P' 48 h | A2497 72 h | A2497P' 72 h |
|----------|----------------------------------|----------------------|--------------------------------------------------|---------|---------------|-----------------|-----------|-------------|-----------|-------------|------------|--------------|------------|--------------|------------|--------------|
| TCF3     | transcription factor 3           | chr19p13.3           | G1 phase of mitotic cell cycle                   | ---     | -1.02         | 1.13            | 1.13      | 1.00        | -1.05     | -1.14       | 1.32       | -1.04        | 1.44       | 1.03         | 1.11       | -1.05        |
| TCF3     | transcription factor 3           | chr19p13.3           | G1 phase of mitotic cell cycle                   | ---     | 1.01          | 1.06            | 1.03      | -1.08       | -1.01     | -1.11       | 1.11       | -1.14        | 1.37       | 1.08         | 1.05       | -1.01        |
| TCF3     | transcription factor 3           | chr19p13.3           | G1 phase of mitotic cell cycle                   | ---     | -1.00         | 1.14            | 1.04      | -1.14       | -1.04     | 1.20        | 1.15       | 1.03         | 1.29       | -1.01        | 1.16       | 1.21         |
| TCF4     | transcription factor 4           | chr18q21.1           | negative regulation of transcription from        | ---     | 1.79          | 1.95            | 1.65      | 2.59        | 1.28      | -1.98       | -9.69      | -1.46        | 2.60       | 3.92         | -2.18      | -1.17        |
| TCF4     | transcription factor 4           | chr18q21.1           | negative regulation of transcription from        | ---     | -1.37         | -7.26           | 1.19      | 2.40        | 1.27      | -1.06       | 3.40       | 1.50         | 3.14       | 4.98         | 9.62       | 10.13        |
| TCF7     | transcription factor 7 (T-cell)  | chr5q31.1            | transcription, DNA-dependent                     | ---     | -1.01         | -1.03           | 1.10      | 1.33        | -1.01     | 1.13        | 1.04       | -1.03        | -1.34      | -1.35        | -1.98      | -2.12        |
| TCF7L1   | transcription factor 7-like 1    | chr2p11.2            | chromatin organization                           | ---     | 5.03          | 11.01           | -12.80    | -6.19       | -1.43     | 1.25        | -1.15      | 1.27         | 1.05       | 1.71         | 5.66       | 3.62         |
| TCF7L2   | transcription factor 7-like 2    | chr10q25.3           | negative regulation of transcription from        | ---     | 1.04          | -1.03           | -1.06     | 1.06        | -1.18     | -1.00       | -1.08      | -1.05        | -1.46      | -1.28        | -1.56      | -1.72        |
| TCF7L2   | transcription factor 7-like 2    | chr10q25.3           | negative regulation of transcription from        | ---     | 1.05          | 1.11            | 1.06      | 1.03        | -1.07     | 1.04        | -1.12      | -1.13        | -1.63      | -1.30        | -1.48      | -1.62        |
| TCF7L2   | transcription factor 7-like 2    | chr10q25.3           | negative regulation of transcription from        | ---     | 1.14          | 1.22            | 1.20      | -1.05       | -1.12     | 1.00        | -1.25      | -1.33        | -1.79      | -1.59        | -1.92      | -2.27        |
| TCF7L2   | transcription factor 7-like 2    | chr10q25.3           | negative regulation of transcription from        | ---     | -1.17         | -1.07           | -1.08     | -1.02       | -1.23     | 1.05        | -1.05      | -1.05        | -1.80      | -1.70        | -1.46      | -1.48        |
| TCHP     | trichoplein, keratin filament    | chr12q24.11          | apoptotic process                                | ---     | 1.05          | 1.31            | -1.33     | 1.36        | -1.24     | 1.07        | 1.57       | 1.22         | -1.16      | -1.02        | -1.44      | -1.02        |
| TCL6     | T-cell leukemia/lymphoma         | chr14q32.1           | 0                                                | ---     | 1.72          | 1.32            | 1.17      | -1.47       | -1.78     | -1.55       | 1.78       | 1.39         | 1.56       | 1.56         | 1.39       | 1.48         |
| TCOF1    | Treacher Collins-Franceschi      | chr5q32              | skeletal system development                      | ---     | -1.11         | -1.29           | -1.27     | 1.04        | -1.09     | -1.07       | 1.43       | 1.35         | 1.43       | 1.30         | -1.82      | -1.59        |
| TCP10L   | t-complex 10-like                | chr21q22.11          | 0                                                | ---     | -1.29         | -1.19           | 1.23      | 1.39        | 1.18      | -1.20       | -1.58      | -1.04        | 1.55       | 1.15         | 2.29       | 2.88         |
| TCP11    | t-complex 11, testis-specific    | chr6p21.31           | multicellular organismal development             | ---     | -1.40         | -1.59           | -1.11     | -1.57       | -1.03     | -1.85       | 1.23       | -1.01        | 1.88       | 1.54         | 1.63       | 1.61         |
| TCP11L1  | t-complex 11, testis-specific    | chr11p13             | 0                                                | ---     | 1.15          | 1.09            | 1.22      | -1.26       | 1.04      | 1.32        | -1.20      | -1.27        | -1.85      | -1.30        | -1.81      | -2.61        |
| TCP11L1  | t-complex 11, testis-specific    | chr11p13             | 0                                                | ---     | -1.03         | -1.03           | 1.11      | 1.07        | -1.06     | -1.14       | 1.27       | 1.18         | 1.16       | 1.14         | 1.35       | 1.38         |
| TCP11L1  | t-complex 11, testis-specific    | chr11p13             | 0                                                | ---     | -1.10         | -1.06           | -1.02     | 1.07        | 1.20      | 1.04        | 1.28       | 1.11         | -1.08      | 1.21         | 1.59       | 1.72         |
| TCP11L2  | t-complex 11, testis-specific    | chr12q23.3           | 0                                                | ---     | 1.30          | 2.10            | 1.45      | 1.11        | -1.47     | -1.25       | -1.29      | 1.32         | -2.13      | -3.20        | -2.25      | -4.15        |
| TCP11L2  | t-complex 11, testis-specific    | chr12q23.3           | 0                                                | ---     | -3.39         | -2.02           | 1.28      | -2.01       | -5.33     | -4.64       | 1.76       | -1.27        | -3.89      | -1.13        | -2.87      | -3.13        |
| TCP11L2  | t-complex 11, testis-specific    | chr12q23.3           | 0                                                | ---     | -1.16         | 1.30            | 1.02      | -1.37       | -1.05     | 1.32        | 1.18       | -1.29        | -3.65      | -1.86        | -2.60      | -2.33        |
| TCP11L2  | t-complex 11, testis-specific    | chr12q23.3           | 0                                                | ---     | -1.92         | -1.24           | -1.23     | -1.21       | 1.49      | 2.30        | -1.17      | 1.14         | -2.34      | -1.89        | -1.70      | -1.75        |
| TCTA     | T-cell leukemia translocat       | chr3p21              | 0                                                | ---     | -1.07         | -1.10           | 1.04      | 1.03        | 1.03      | -1.08       | -1.13      | 1.02         | -2.58      | -2.20        | -3.45      | -2.13        |
| TCTE3    | t-complex-associated-testis      | chr6q27              | transport                                        | ---     | -1.05         | 1.06            | 1.16      | 1.12        | 2.01      | 1.64        | -1.53      | -1.03        | 1.40       | 1.27         | -1.02      | -1.39        |
| TCTEX1D1 | Tctex1 domain containing         | chr1p31.3            | 0                                                | ---     | 1.93          | 1.69            | -1.12     | 1.41        | 1.24      | -1.04       | -2.19      | -3.15        | 6.13       | 2.37         | 1.26       | 1.95         |
| TCTN1    | tectonic family member 1         | chr12q24.11          | in utero embryonic development                   | ---     | 1.12          | 1.06            | 1.04      | 1.08        | 1.00      | 1.03        | 1.22       | 1.15         | -1.34      | -1.25        | -1.89      | -1.54        |
| TCTN1    | tectonic family member 1         | chr12q24.11          | in utero embryonic development                   | ---     | 1.44          | 2.06            | 1.12      | -1.00       | 1.02      | 1.07        | 1.40       | 1.16         | -2.78      | -2.34        | -5.03      | -3.77        |
| TCTN2    | tectonic family member 2         | chr12q24.31          | smoothed signaling pathway                       | ---     | 1.00          | -1.14           | 1.06      | 1.00        | -1.05     | 1.08        | -1.20      | -1.07        | -1.17      | -1.05        | -1.29      | -1.15        |
| TD02     | tryptophan 2,3-dioxygenase       | chr4q31-q32          | tryptophan catabolic process                     | ---     | -2.16         | 1.09            | 1.62      | 2.61        | -2.53     | 1.37        | 1.17       | 3.63         | 3.04       | -1.36        | 3.67       | 5.79         |
| TDP1     | tyrosyl-DNA phosphodiesterase    | chr14q32.11          | single strand break repair                       | ---     | -1.01         | -1.04           | -1.03     | -1.02       | 1.00      | -1.07       | 1.01       | 1.08         | 1.06       | 1.17         | 1.11       | 1.22         |
| TD2      | tyrosyl-DNA phosphodiesterase    | chr6p22.3-p22.1      | DNA repair                                       | ---     | 1.08          | -1.03           | -1.01     | 1.04        | 1.17      | 1.18        | -1.09      | 1.03         | -1.12      | -1.31        | 1.12       | -1.03        |
| TD3      | tudor domain containing 3        | chr13q21.2           | mRNA processing                                  | ---     | -1.21         | -1.16           | 1.02      | 1.01        | 1.19      | 1.02        | -1.00      | -1.04        | -1.26      | -1.26        | -1.16      | -1.16        |
| TD3      | tudor domain containing 3        | chr13q21.2           | chromatin modification                           | ---     | 1.04          | 1.13            | 1.05      | 1.19        | -1.24     | 1.09        | -1.19      | 1.33         | -2.12      | -1.11        | -1.44      | -1.41        |
| TD3      | tudor domain containing 3        | chr13q21.2           | mRNA processing                                  | ---     | -1.11         | -1.12           | -1.01     | 1.03        | 1.04      | -1.07       | 1.13       | -1.01        | -1.14      | -1.10        | -1.22      | -1.13        |
| TD6      | tudor domain containing 6        | chr6p12.3            | multicellular organismal development             | ---     | -1.34         | -1.15           | 1.61      | 1.89        | 1.40      | 1.42        | 1.02       | -1.29        | -2.03      | -2.25        | -3.19      | -2.11        |
| TD9      | tudor domain containing 9        | chr14q32.33          | meiosis                                          | ---     | -1.04         | 1.01            | 1.03      | 1.03        | -1.06     | 1.10        | -1.30      | -1.09        | -1.59      | -1.32        | -2.68      | -2.40        |
| TDKH     | tudor and KH domain containing   | chr1q21              | male meiosis                                     | ---     | -1.03         | 1.00            | -1.08     | -1.15       | -1.04     | -1.02       | 1.11       | 1.33         | -1.60      | -1.26        | 1.33       | 1.17         |
| TDKH     | tudor and KH domain containing   | chr1q21              | male meiosis                                     | ---     | 1.11          | -1.18           | 1.11      | 1.48        | 1.77      | 3.63        | 1.00       | -1.87        | -1.79      | -2.26        | 1.90       | 2.38         |
| TDPR     | testis development related       | chr8p23.3            | spermatogenesis                                  | ---     | 1.64          | 1.94            | 1.60      | 2.61        | 1.66      | -1.05       | 3.29       | 1.52         | 3.43       | 7.77         | 1.56       | 3.65         |
| TEAD1    | TEA domain family member         | chr11p15.2           | transcription, DNA-dependent                     | ---     | 1.04          | 1.07            | 1.09      | 1.10        | 1.05      | 1.00        | -1.10      | 1.07         | -1.14      | -1.04        | -1.17      | -1.38        |
| TEAD4    | TEA domain family member         | chr12p13.3-p13.2     | skeletal system development                      | ---     | 1.04          | -1.10           | 1.02      | 1.15        | 1.00      | -1.07       | 1.10       | 1.17         | 1.49       | 1.18         | 1.29       | 1.43         |
| TEAD4    | TEA domain family member         | chr12p13.3-p13.2     | skeletal system development                      | ---     | -1.10         | -1.17           | -1.01     | 1.06        | 1.10      | -1.04       | 1.14       | 1.30         | 1.53       | 1.20         | 1.23       | 1.38         |
| TECPR2   | tectonin beta-propeller repeat   | chr14q32.31          | autophagy                                        | ---     | 1.31          | 1.25            | 1.04      | 1.12        | -1.04     | -1.02       | -1.13      | 1.08         | -1.58      | -2.47        | -1.86      | -2.47        |
| TECPR2   | tectonin beta-propeller repeat   | chr14q32.31          | autophagy                                        | ---     | 1.05          | 1.09            | 1.09      | -1.08       | -1.04     | 1.07        | -1.35      | -1.22        | -1.61      | -1.31        | -1.52      | -1.17        |
| TEF      | thyrotrophic embryonic factor    | chr22q13.2           | transcription, DNA-dependent                     | ---     | -1.19         | -1.30           | 1.05      | -1.12       | 1.46      | 1.27        | 1.01       | -1.12        | 1.05       | 1.18         | 1.51       | 1.52         |
| TEFM     | transcription elongation factor  | ---                  | oxidative phosphorylation                        | ---     | 1.17          | 1.04            | -1.01     | 1.15        | 1.00      | 1.03        | -1.26      | -1.18        | -1.61      | -1.49        | -1.50      | -1.52        |
| TEKT2    | tektin 2 (testicular)            | chr1p34.3            | microtubule cytoskeleton organization            | ---     | -1.28         | -1.05           | -1.26     | 1.20        | -1.99     | 1.26        | -1.86      | -1.89        | -1.58      | 1.04         | -4.18      | -1.50        |
| TELO2    | TEL2, telomere maintenance       | chr16p13.3           | regulation of TOR signaling cascade              | ---     | -1.11         | -1.07           | -1.05     | 1.11        | -1.09     | -1.19       | 1.11       | 1.30         | -1.23      | -1.31        | -1.56      | -1.30        |
| TELO2    | TEL2, telomere maintenance       | chr16p13.3           | regulation of TOR signaling cascade              | ---     | 1.06          | 1.01            | 1.00      | 1.21        | -1.16     | -1.09       | 1.21       | 1.16         | -1.52      | -1.77        | -1.98      | -1.63        |
| TENC1    | tensin like C1 domain containing | chr12q13.13          | kidney development                               | ---     | -1.06         | -1.20           | -1.10     | -1.05       | -1.11     | -1.09       | 1.03       | 1.16         | -1.18      | -1.14        | -1.76      | -1.32        |
| TENM3    | teneurin transmembrane protein   | chr4q35.1            | cell adhesion                                    | ---     | -1.28         | -2.11           | -7.63     | -1.29       | 1.20      | 1.33        | 1.08       | 1.80         | 1.33       | 1.86         | 2.82       | 3.09         |
| TEPP     | testis, prostate and placental   | chr16q21             | 0                                                | ---     | -2.10         | -1.43           | 1.87      | 1.66        | 1.79      | 1.48        | 2.63       | 3.09         | 5.59       | 3.54         | 4.18       | 5.02         |
| TERF1    | telomeric repeat binding factor  | chr8q21.11           | G2                                               | ---     | 1.12          | 1.06            | -1.05     | -1.07       | -1.03     | 1.01        | -1.28      | -1.08        | -1.70      | -1.39        | -1.61      | -1.74        |
| TERF2    | telomeric repeat binding factor  | chr16q22.1           | telomere maintenance                             | ---     | -1.04         | -1.12           | 1.09      | 1.04        | 1.12      | 1.08        | -1.04      | -1.01        | -1.22      | -1.06        | 1.33       | 1.26         |
| TERF2    | telomeric repeat binding factor  | chr16q22.1           | telomere maintenance                             | ---     | 1.10          | -1.12           | 1.01      | -1.01       | 1.03      | -1.03       | 1.37       | 1.13         | 1.35       | 1.18         | 1.58       | 1.51         |
| TERT     | telomerase reverse transcriptase | chr5p15.33           | telomere maintenance                             | ---     | 1.03          | -1.43           | -1.02     | 1.43        | -1.06     | 1.05        | 1.05       | 1.55         | 1.12       | 1.18         | 1.24       | 1.31         |
| TES      | testis derived transcript (3)    | chr7q31.2            | negative regulation of cell proliferation        | ---     | 1.10          | 1.15            | -1.02     | -1.06       | -1.13     | 1.10        | -1.16      | -1.09        | -1.40      | -1.04        | -1.49      | -1.68        |
| TES      | testis derived transcript (3)    | chr7q31.2            | negative regulation of cell proliferation        | ---     | -1.12         | -1.05           | 1.10      | -1.04       | 1.01      | -1.11       | 1.23       | 1.10         | -1.02      | 1.16         | 1.11       | 1.11         |
| TESC     | tescalcin                        | chr12q24.22          | negative regulation of protein kinase activity   | ---     | 1.02          | 1.02            | 1.07      | 1.19        | -1.07     | -1.19       | 1.68       | 1.65         | 1.48       | 1.22         | -1.32      | -1.48        |
| TET3     | tet methylcytosine dioxygenase   | chr2p13.1            | protein O-linked glycosylation                   | ---     | 1.27          | 1.18            | -1.03     | -1.10       | -1.19     | 1.02        | -1.54      | -1.32        | -1.80      | -1.63        | -1.33      | -1.66        |
| TET3     | tet methylcytosine dioxygenase   | chr2p13.1            | protein O-linked glycosylation                   | ---     | -1.19         | -1.98           | 2.95      | 1.03        | -1.06     | 1.70        | 1.11       | 2.69         | 1.86       | 1.59         | 1.63       | 1.19         |
| TEX10    | testis expressed 10              | chr9q31.1            | 0                                                | ---     | 1.05          | -1.01           | 1.09      | 1.01        | 1.02      | 1.02        | 1.16       | 1.15         | -1.07      | -1.15        | -1.11      | -1.19        |
| TEX10    | testis expressed 10              | chr9q31.1            | 0                                                | ---     | 1.02          | -1.01           | -1.03     | -1.09       | 1.02      | -1.19       | 1.20       | 1.24         | -1.43      | -1.40        | -1.74      | -1.56        |
| TEX11    | testis expressed 11              | chrXq13.1            | resolution of meiotic recombination intermediate | ---     | 1.48          | 1.14            | -1.00     | 1.08        | 1.72      | 1.06        | -1.91      | -2.77        | 1.82       | -1.05        | -5.91      | -1.22        |
| TEX13A   | testis expressed 13A             | chrXq22.3            | 0                                                | ---     | -3.30         | 1.12            | -1.55     | -3.29       | -1.77     | -2.74       | 1.04       | 3.53         | 1.46       | -2.48        | 2.17       | 16.52        |

| ID      | Gene Title                    | Chromosomal Location | 1st Gene Ontology Biological Process       | Pathway                                | A2497 30 mins | A2497P' 30 mins | A2497 2 h | A2497P' 2 h | A2497 4 h | A2497P' 4 h | A2497 24 h | A2497P' 24 h | A2497 48 h | A2497P' 48 h | A2497 72 h | A2497P' 72 h |
|---------|-------------------------------|----------------------|--------------------------------------------|----------------------------------------|---------------|-----------------|-----------|-------------|-----------|-------------|------------|--------------|------------|--------------|------------|--------------|
| TEX261  | testis expressed 261          | chr2p13.3            | positive regulation of apoptotic process   | ---                                    | -1.14         | -1.25           | 1.06      | 1.00        | 1.01      | -1.17       | 1.18       | -1.20        | -1.64      | -1.80        | -2.52      | -1.84        |
| TEX261  | testis expressed 261          | chr2p13.3            | positive regulation of apoptotic process   | ---                                    | -1.07         | -1.08           | -1.01     | -1.00       | -1.03     | 1.00        | -1.02      | -1.03        | -1.81      | -1.82        | -2.23      | -1.93        |
| TEX264  | testis expressed 264          | chr3p21.31           | 0                                          | ---                                    | -1.12         | -1.04           | -1.02     | -1.23       | 1.03      | -1.06       | -1.02      | -1.11        | -1.32      | -1.29        | 1.21       | 1.24         |
| TEX264  | testis expressed 264          | chr3p21.31           | 0                                          | ---                                    | -1.01         | 1.13            | 1.02      | -1.11       | 1.13      | 1.07        | 1.09       | -1.08        | -1.26      | -1.44        | 1.35       | 1.16         |
| TEX30   | testis expressed 30           | chr13q33.1           | 0                                          | ---                                    | 1.00          | 1.07            | 1.15      | 1.02        | -1.02     | 1.02        | -1.14      | -1.15        | -1.02      | -1.12        | 1.38       | 1.14         |
| TEX36   | testis expressed 36           | chr10q26.13          | 0                                          | ---                                    | 1.14          | 1.16            | 1.13      | -1.12       | 1.09      | -1.03       | -1.28      | -1.45        | 1.56       | 1.26         | 1.48       | 1.45         |
| TEX9    | testis expressed 9            | chr15q21.3           | 0                                          | ---                                    | -1.11         | 1.05            | -1.05     | 1.12        | -1.21     | 1.10        | 1.13       | 1.56         | -1.57      | -1.31        | -1.56      | -1.93        |
| TF      | transferrin                   | chr3q22.1            | platelet degranulation                     | ---                                    | -4.16         | -1.74           | -1.37     | -1.61       | -2.70     | 2.27        | -2.18      | 1.78         | 7.60       | 11.54        | 4.95       | -1.25        |
| TFAM    | transcription factor A, mito  | chr10q21             | DNA-dependent DNA replication              | ---                                    | 1.03          | 1.16            | -1.05     | -1.12       | -1.12     | -1.13       | -1.04      | -1.05        | -1.09      | -1.15        | -1.17      | -1.44        |
| TFAM    | transcription factor A, mito  | chr10q21             | DNA-dependent DNA replication              | ---                                    | -1.13         | -1.08           | 1.08      | 1.13        | 1.17      | 1.13        | -1.12      | -1.00        | -1.55      | -1.75        | -1.46      | -1.55        |
| TFAM    | transcription factor A, mito  | chr10q21             | DNA-dependent DNA replication              | ---                                    | -1.07         | -1.10           | -1.01     | 1.00        | 1.06      | 1.09        | -1.18      | -1.20        | -1.70      | -1.48        | -1.49      | -1.46        |
| TFAP2A  | transcription factor AP-2 al  | chr6p24              | negative regulation of transcription from  | ---                                    | -1.05         | -1.03           | 1.06      | -1.03       | 1.22      | 1.04        | -1.08      | -1.18        | 1.08       | -1.00        | 1.58       | 1.59         |
| TFAP2B  | transcription factor AP-2 b   | chr6p12              | negative regulation of transcription from  | ---                                    | 2.98          | 5.36            | -1.21     | 1.48        | -1.67     | 1.80        | -2.92      | -1.36        | 1.81       | 2.29         | -5.83      | -2.99        |
| TFAP2C  | transcription factor AP-2 c   | chr20q13.2           | trophoblast cell differentiation           | ---                                    | -1.01         | -1.04           | -1.04     | -1.09       | -1.21     | 1.08        | 1.01       | 1.01         | 1.21       | 1.33         | 1.49       | 1.39         |
| TFAP2E  | transcription factor AP-2 e   | chr1p34.3            | transcription, DNA-dependent               | ---                                    | 1.62          | 1.20            | 1.08      | 1.30        | 2.46      | 2.74        | 1.07       | -2.69        | 2.50       | 1.71         | -1.05      | 1.19         |
| TFB1M   | transcription factor B1, mit  | chr6q25.1-q25.3      | rRNA modification                          | ---                                    | -1.25         | -1.23           | -1.02     | 1.00        | -1.07     | -1.05       | 1.23       | 1.27         | 1.67       | 1.65         | 1.93       | 1.89         |
| TFB1M   | transcription factor B1, mit  | chr6q25.1-q25.3      | rRNA modification                          | ---                                    | -1.17         | -1.17           | 1.09      | 1.15        | -1.07     | -1.06       | 1.05       | 1.05         | 1.67       | 1.62         | 1.73       | 1.68         |
| TFB2M   | transcription factor B2, mit  | chr1q44              | rRNA modification                          | ---                                    | 1.15          | 1.22            | -1.03     | -1.11       | -1.04     | -1.03       | -1.12      | -1.09        | -1.03      | -1.29        | 1.46       | 1.20         |
| TFCP2   | transcription factor CP2      | chr12q13             | transcription, DNA-dependent               | ---                                    | 1.26          | 1.07            | 1.16      | -1.10       | 1.06      | 1.26        | -1.13      | 1.29         | -1.93      | -1.60        | -1.39      | -1.81        |
| TFCP2   | transcription factor CP2      | chr12q13             | transcription, DNA-dependent               | ---                                    | -1.17         | -1.05           | -1.03     | 1.07        | 1.03      | 1.07        | 1.07       | -1.07        | 1.06       | -1.06        | 1.40       | 1.53         |
| TFCP2   | transcription factor CP2      | chr12q13             | transcription, DNA-dependent               | ---                                    | 1.02          | -1.03           | 1.03      | 1.01        | -1.03     | 1.00        | -1.32      | -1.11        | -1.34      | -1.21        | 1.22       | 1.20         |
| TFCP2L1 | transcription factor CP2-like | chr2q14              | negative regulation of transcription from  | ---                                    | 1.77          | 1.64            | 1.24      | -2.61       | 1.79      | 2.28        | -4.13      | 1.26         | -4.88      | -4.61        | 2.07       | 3.13         |
| TFDP1   | transcription factor Dp-1     | chr13q34             | G1                                         | Cell_cycle_KEGG // GenMAPP // G1_to_S  | 1.04          | 1.01            | -1.05     | 1.01        | -1.10     | -1.07       | 1.05       | 1.15         | 1.69       | 1.39         | 1.32       | 1.04         |
| TFDP1   | transcription factor Dp-1     | chr13q34             | G1 phase of mitotic cell cycle             | Cell_cycle_KEGG // GenMAPP // G1_to_S  | 1.03          | 1.12            | -1.03     | -1.10       | -1.05     | -1.07       | -1.05      | -1.09        | 1.02       | -1.08        | -1.04      | -1.24        |
| TFDP2   | transcription factor Dp-2     | chr3q23              | G1 phase of mitotic cell cycle             | G1_to_S_cell_cycle_Reactome // GenMAPP | 1.16          | 1.18            | 1.07      | 1.10        | 1.27      | 1.21        | -1.31      | -1.05        | -2.71      | -2.32        | -2.57      | -2.51        |
| TFDP2   | transcription factor Dp-2     | chr3q23              | G1 phase of mitotic cell cycle             | G1_to_S_cell_cycle_Reactome // GenMAPP | 1.00          | -1.07           | -1.06     | 1.04        | -1.03     | -1.05       | 1.08       | 1.07         | -1.06      | 1.00         | 1.20       | 1.18         |
| TFDP2   | transcription factor Dp-2     | chr3q23              | G1 phase of mitotic cell cycle             | G1_to_S_cell_cycle_Reactome // GenMAPP | 1.03          | 1.00            | -1.04     | 1.05        | 1.05      | 1.08        | -1.08      | -1.05        | -1.51      | -1.34        | -1.15      | -1.10        |
| TFDP2   | transcription factor Dp-2     | chr3q23              | G1 phase of mitotic cell cycle             | G1_to_S_cell_cycle_Reactome // GenMAPP | 1.45          | 1.53            | -1.04     | -1.65       | 1.05      | 1.14        | -1.67      | -1.34        | -2.17      | -2.23        | -3.48      | -2.80        |
| TFE3    | transcription factor binding  | chrXp11.22           | transcription, DNA-dependent               | TGF_Beta_Signaling_Pathway // GenMAPP  | -1.71         | 1.26            | 1.09      | 1.05        | 1.76      | 1.25        | 1.91       | 2.11         | 2.44       | 2.14         | 1.76       | 2.53         |
| TFE3    | transcription factor binding  | chrXp11.22           | transcription, DNA-dependent               | TGF_Beta_Signaling_Pathway // GenMAPP  | -1.09         | 1.20            | 1.42      | 1.09        | 1.58      | 1.55        | 1.82       | -1.59        | 1.35       | 1.60         | 1.87       | 2.01         |
| TFE3    | transcription factor binding  | chrXp11.22           | transcription, DNA-dependent               | TGF_Beta_Signaling_Pathway // GenMAPP  | -1.05         | -1.08           | -1.07     | -1.12       | 1.22      | 1.03        | -1.14      | 1.05         | 1.86       | 2.04         | 1.49       | 1.84         |
| TFF1    | trefoil factor 1              | chr21q22.3           | carbohydrate metabolic process             | TGF_Beta_Signaling_Pathway // GenMAPP  | -1.13         | -1.09           | 1.04      | 1.05        | -1.12     | -1.04       | 1.04       | 1.05         | 1.39       | 1.33         | 1.38       | 1.30         |
| TFF2    | trefoil factor 2              | chr21q22.3           | digestion                                  | ---                                    | 1.24          | 1.18            | -1.00     | 1.27        | 1.92      | 1.47        | 1.74       | 1.46         | 6.79       | 4.58         | 9.49       | 8.07         |
| TFF2    | trefoil factor 2              | chr21q22.3           | digestion                                  | ---                                    | 1.21          | 1.04            | 1.27      | 1.11        | 1.34      | -1.13       | -1.38      | -1.74        | 3.55       | 3.13         | 4.57       | 3.59         |
| TFG     | TRK-fused gene                | chr3q12.2            | signal transduction                        | Apoptosis_KEGG // GenMAPP              | -1.04         | -1.07           | -1.11     | -1.07       | -1.12     | -1.03       | -1.13      | -1.05        | 1.02       | 1.19         | 1.20       | 1.23         |
| TFG     | TRK-fused gene                | chr3q12.2            | signal transduction                        | ---                                    | 1.02          | -1.02           | 1.14      | 1.05        | 1.04      | 1.01        | 1.08       | -1.08        | -1.01      | 1.13         | 1.35       | 1.42         |
| TFIP1   | tuftelin interacting protein  | chr22q12.1           | mRNA splicing, via spliceosome             | ---                                    | -1.06         | -1.16           | -1.03     | 1.06        | 1.03      | 1.02        | -1.16      | 1.19         | 1.07       | 1.21         | 1.43       | 1.79         |
| TFPI    | tissue factor pathway inhibi  | chr2q32              | blood coagulation                          | ---                                    | 1.03          | 1.06            | -1.03     | -1.17       | -1.14     | -1.10       | 1.03       | 1.02         | 1.25       | 1.26         | 1.34       | 1.24         |
| TFPI    | tissue factor pathway inhibi  | chr2q32              | blood coagulation                          | ---                                    | -1.22         | -1.22           | 1.10      | 1.09        | -1.28     | 1.03        | 1.25       | 1.31         | 1.39       | 1.46         | 1.62       | 1.39         |
| TFPI    | tissue factor pathway inhibi  | chr2q32              | blood coagulation                          | ---                                    | 1.07          | 1.00            | 1.24      | 1.08        | -1.07     | 1.15        | 1.08       | 1.10         | 1.19       | 1.26         | 1.46       | 1.50         |
| TFPI    | tissue factor pathway inhibi  | chr2q32              | blood coagulation                          | ---                                    | 1.07          | 1.08            | -1.04     | -1.08       | -1.04     | 1.06        | -1.02      | -1.07        | -1.13      | 1.07         | -1.28      | -1.29        |
| TFPI2   | tissue factor pathway inhibi  | chr7q22              | blood coagulation                          | ---                                    | 1.35          | 1.28            | 1.15      | 1.20        | -1.11     | 1.01        | 1.03       | -1.22        | -1.35      | -2.16        | -2.99      | ---          |
| TFPI2   | tissue factor pathway inhibi  | chr7q22              | blood coagulation                          | ---                                    | 1.30          | 1.24            | 1.08      | -1.20       | 1.00      | -1.14       | -1.23      | -1.11        | 1.20       | -1.40        | -1.45      | -2.38        |
| TFRC    | transferrin receptor (p90, C  | chr3q29              | proteolysis                                | ---                                    | 2.95          | 2.35            | -1.56     | -2.43       | 3.09      | 1.98        | -1.26      | -1.34        | 2.43       | 2.61         | 2.26       | 1.24         |
| TGFA    | transforming growth factor    | chr2p13              | MAPK cascade                               | ---                                    | -2.43         | -1.16           | -2.88     | -1.93       | -2.19     | 1.97        | 1.01       | 2.45         | 2.15       | 2.85         | -3.31      | -1.30        |
| TGFA    | transforming growth factor    | chr2p13              | MAPK cascade                               | ---                                    | 1.87          | 1.53            | -1.24     | -1.28       | 1.17      | 1.06        | 1.77       | 1.37         | 1.89       | 1.46         | 2.72       | 2.15         |
| TGFB1   | transforming growth factor    | chr19q13.1           | protein import into nucleus, translocation | Cell_cycle_KEGG // GenMAPP // TGF_Be   | 1.14          | -1.01           | 1.10      | 1.09        | 1.04      | -1.03       | 1.20       | 1.04         | 2.13       | 1.72         | 1.77       | 2.05         |
| TGFB2   | transforming growth factor    | chr1q41              | cell morphogenesis                         | ---                                    | -1.39         | -1.13           | 1.25      | 1.90        | -1.02     | -1.45       | -1.06      | 1.15         | 1.16       | -1.44        | 3.25       | 2.52         |
| TGFB2   | transforming growth factor    | chr1q41              | cell morphogenesis                         | ---                                    | -1.07         | 1.05            | -1.02     | -1.15       | -1.39     | -1.06       | -1.87      | -1.32        | -1.00      | 1.01         | 1.41       | 1.42         |
| TGFB2   | transforming growth factor    | chr1q41              | cell morphogenesis                         | ---                                    | -1.97         | -1.06           | 1.11      | 1.58        | 1.07      | 1.08        | -2.15      | -1.39        | 1.05       | 1.00         | 1.72       | 1.92         |
| TGFB3   | transforming growth factor    | chr14q24             | activation of MAPK activity                | ---                                    | 1.21          | 1.22            | 1.01      | 1.07        | -1.06     | -1.12       | -1.48      | 1.01         | -2.20      | -2.22        | -1.53      | -2.13        |
| TGFB3   | transforming growth factor    | chr9q22              | activation of MAPK activity                | TGF_Beta_Signaling_Pathway // GenMAPP  | 1.66          | -1.72           | 1.03      | -1.03       | -1.00     | 1.13        | 1.34       | 1.06         | -1.51      | -1.16        | -1.54      | -1.45        |
| TGFB3   | transforming growth factor    | chr9q22              | activation of MAPK activity                | TGF_Beta_Signaling_Pathway // GenMAPP  | -2.08         | -1.62           | -1.20     | 1.22        | -1.03     | 1.94        | 2.04       | 1.16         | 1.66       | 1.14         | 1.30       | 1.39         |
| TGFB2   | transforming growth factor    | chr3p22              | blood vessel development                   | TGF_Beta_Signaling_Pathway // GenMAPP  | 1.25          | 1.23            | 1.02      | -1.09       | -1.02     | -1.02       | 1.01       | -1.01        | -1.83      | -1.84        | -2.01      | -2.51        |
| TGFB3   | transforming growth factor    | chr1p33-p32          | blood vessel development                   | TGF_Beta_Signaling_Pathway // GenMAPP  | 1.26          | 1.33            | 1.03      | -1.27       | -1.11     | 1.07        | -1.23      | -1.06        | -1.79      | -1.55        | -1.48      | -2.01        |
| TGFB3   | transforming growth factor    | chr1p33-p32          | blood vessel development                   | TGF_Beta_Signaling_Pathway // GenMAPP  | -1.09         | -1.27           | -1.02     | -1.07       | 1.22      | 1.05        | -1.09      | 1.01         | -2.30      | -1.77        | -1.35      | -1.38        |
| TGFB3   | transforming growth factor    | chr2q12.1            | regulation of transcription, DNA-depend    | ---                                    | 1.27          | 1.24            | -1.02     | -1.14       | -1.07     | 1.02        | -1.12      | -1.12        | -2.16      | -1.68        | -1.80      | -2.02        |
| TGIF2   | TGFB-induced factor home      | chr20q11.23          | negative regulation of transcription from  | ---                                    | -1.01         | -1.00           | 1.03      | 1.08        | 1.01      | -1.03       | 1.12       | 1.11         | -1.02      | -1.16        | -1.43      | -1.21        |
| TGIF2   | TGFB-induced factor home      | chr20q11.23          | negative regulation of transcription from  | ---                                    | -1.05         | -1.07           | 1.02      | -1.04       | 1.14      | 1.08        | 1.19       | 1.06         | -1.03      | -1.06        | -1.10      | -1.35        |
| TGM2    | transglutaminase 2 (C poly    | chr20q12             | blood vessel remodeling                    | ---                                    | 1.20          | -2.94           | -1.43     | -1.62       | -1.05     | 1.05        | 1.61       | 2.05         | 18.05      | 12.04        | 2.54       | 2.54         |
| TGM2    | transglutaminase 2 (C poly    | chr20q12             | blood vessel remodeling                    | ---                                    | -2.40         | 1.06            | 1.92      | 3.79        | 1.33      | 1.02        | -6.27      | 1.56         | -1.36      | 1.08         | -1.65      | -19.04       |
| TGM2    | transglutaminase 2 (C poly    | chr20q12             | blood vessel remodeling                    | ---                                    | 1.08          | 1.05            | -1.17     | 1.25        | -1.07     | -1.24       | 1.16       | 1.56         | 12.94      | 10.62        | 3.94       | 4.69         |
| TGM2    | transglutaminase 2 (C poly    | chr20q12             | blood vessel remodeling                    | ---                                    | 1.06          | -1.05           | 1.02      | 1.29        | 1.17      | 1.19        | 1.29       | 1.26         | 6.74       | 4.79         | 3.52       | 3.56         |
| TGOLN2  | trans-golgi network protein   | chr2p11.2            | 0                                          | ---                                    | -1.06         | 1.00            | 1.16      | 1.01        | 1.13      | -1.02       | -1.04      | -1.13        | 1.03       | 1.15         | -1.50      | -1.62        |
| TGOLN2  | trans-golgi network protein   | chr2p11.2            | 0                                          | ---                                    | -1.68         | -1.68           | -1.41     | 1.04        | -1.27     | 1.02        | 1.08       | 1.07         | -2.12      | -1.98        | 1.31       | 1.20         |
| TGS1    | trimethylguanosine synthase   | chr8q11              | spliceosomal snRNP assembly                | ---                                    | 1.12          | 1.11            | 1.11      | -1.03       | -1.09     | 1.04        | -1.21      | -1.14        | -1.39      | -1.45        | -1.19      | -1.59        |

| ID        | Gene Title                          | Chromosomal Location | 1st Gene Ontology Biological Process                                 | Pathway                                | A2497 30 mins | A2497P' 30 mins | A2497 2 h | A2497P' 2 h | A2497 4 h | A2497P' 4 h | A2497 24 h | A2497P' 24 h | A2497 48 h | A2497P' 48 h | A2497 72 h | A2497P' 72 h |
|-----------|-------------------------------------|----------------------|----------------------------------------------------------------------|----------------------------------------|---------------|-----------------|-----------|-------------|-----------|-------------|------------|--------------|------------|--------------|------------|--------------|
| TGS1      | trimethylguanosine synthase         | chr8q11              | spliceosomal snRNP assembly                                          | ---                                    | -1.10         | -1.08           | 1.04      | -1.11       | 1.04      | 1.06        | -1.14      | 1.01         | -1.52      | -1.46        | -1.27      | -1.29        |
| THADA     | thyroid adenoma associated          | chr2p21              | 0                                                                    | ---                                    | 1.01          | -1.08           | 1.12      | 1.14        | 1.09      | 1.05        | -1.08      | -1.02        | -1.52      | -1.34        | -1.80      | -1.58        |
| THADA     | thyroid adenoma associated          | chr2p21              | 0                                                                    | ---                                    | -1.08         | -1.18           | 1.15      | 1.23        | 1.15      | 1.06        | -1.01      | 1.10         | -1.65      | -1.40        | -1.84      | -1.45        |
| THADA     | thyroid adenoma associated          | chr2p21              | 0                                                                    | ---                                    | -1.11         | -1.38           | -1.33     | -3.96       | 1.47      | 2.55        | -2.33      | 1.15         | 4.05       | 3.09         | 1.62       | 1.77         |
| THADA     | thyroid adenoma associated          | chr2p21              | 0                                                                    | ---                                    | -1.03         | 1.01            | 1.09      | 1.12        | 1.03      | 1.08        | 1.24       | 1.13         | 1.30       | 1.26         | 1.51       | 1.60         |
| THAP1     | THAP domain containing              | chr8p11.21           | endothelial cell proliferation                                       | ---                                    | 1.01          | 1.05            | 1.02      | -1.13       | -1.11     | -1.01       | -1.47      | -1.22        | -1.66      | -1.30        | -1.30      | -1.37        |
| THAP11    | THAP domain containing              | chr16q22.1           | transcription, DNA-dependent                                         | ---                                    | 1.00          | -1.09           | 1.03      | 1.08        | -1.07     | -1.04       | 1.00       | -1.06        | -1.05      | -1.12        | -1.19      | -1.17        |
| THAP2     | THAP domain containing              | chr12q21.1           | 0                                                                    | ---                                    | -1.04         | 1.03            | 1.01      | -1.03       | -1.06     | -1.01       | -1.09      | 1.10         | 1.51       | 1.30         | 1.77       | 1.71         |
| THAP3     | THAP domain containing              | chr1p36.31           | 0                                                                    | ---                                    | -1.25         | -1.35           | -1.08     | -1.04       | 1.24      | 1.12        | 1.39       | 1.23         | 1.54       | 1.25         | 1.64       | 1.73         |
| THAP4     | THAP domain containing              | chr2q37.3            | 0                                                                    | ---                                    | -1.03         | -1.11           | 1.06      | 1.11        | 1.17      | -1.05       | 1.40       | 1.24         | 1.63       | 1.19         | 1.22       | 1.31         |
| THAP5     | THAP domain containing              | chr7q31.1            | cell cycle                                                           | ---                                    | -1.11         | -1.20           | 1.19      | -1.11       | 1.16      | -1.12       | -1.19      | 1.04         | 1.60       | 1.62         | 2.06       | 2.35         |
| THAP6     | THAP domain containing              | chr4q21.1            | 0                                                                    | ---                                    | -1.17         | -1.34           | 1.20      | 1.08        | 1.41      | 1.07        | 1.05       | -1.02        | -1.30      | -1.14        | -1.17      | -1.26        |
| THAP7-AS1 | THAP7 antisense RNA 1               | chr22q11.21          | 0                                                                    | ---                                    | -1.19         | -1.02           | -1.13     | -1.40       | -1.02     | -1.47       | 1.00       | 1.18         | -3.64      | -3.37        | -4.17      | -2.01        |
| THAP7-AS1 | THAP7 antisense RNA 1               | chr22q11.21          | 0                                                                    | ---                                    | 1.19          | 1.07            | 1.04      | 1.01        | 1.10      | 1.23        | 1.02       | 1.41         | -1.50      | -1.50        | -1.78      | -1.59        |
| THAP9-AS1 | THAP9 antisense RNA 1               | ---                  | 0                                                                    | ---                                    | 1.24          | 1.26            | 1.03      | -1.09       | 1.04      | 1.05        | 1.27       | 1.17         | 1.15       | 1.04         | 1.50       | 1.15         |
| THBD      | thrombomodulin                      | chr20p11.2           | female pregnancy                                                     | ---                                    | 1.41          | 1.60            | 1.18      | 1.16        | -1.38     | 1.23        | -1.83      | 1.48         | 1.78       | 1.84         | 2.28       | 2.49         |
| THBD      | thrombomodulin                      | chr20p11.2           | female pregnancy                                                     | ---                                    | -1.10         | -1.15           | -1.02     | -1.01       | 1.19      | 1.26        | -1.12      | -1.16        | 2.00       | 1.63         | 2.75       | 2.50         |
| THBD      | thrombomodulin                      | chr20p11.2           | female pregnancy                                                     | ---                                    | -1.07         | -1.21           | -1.07     | -1.12       | 1.01      | -1.15       | -1.07      | 1.05         | 2.09       | 1.73         | 2.62       | 2.48         |
| THBS1     | thrombospondin 1                    | chr15q15             | activation of MAPK activity                                          | Inflammatory_Response_Pathway // GenMA | 1.54          | 1.47            | 1.03      | -1.07       | -1.08     | 1.18        | -1.45      | -1.11        | -1.33      | -1.70        | 2.28       | -1.07        |
| THBS1     | thrombospondin 1                    | chr15q15             | activation of MAPK activity                                          | Inflammatory_Response_Pathway // GenMA | -1.31         | -1.63           | 1.01      | -1.17       | 1.15      | 1.07        | 1.46       | 1.11         | -1.14      | 1.12         | 3.32       | 2.71         |
| THBS1     | thrombospondin 1                    | chr15q15             | activation of MAPK activity                                          | Inflammatory_Response_Pathway // GenMA | -1.11         | -1.48           | 1.09      | 1.41        | 1.28      | 1.06        | -1.11      | 1.07         | 1.51       | -1.14        | 1.97       | 1.74         |
| THEM4     | thioesterase superfamily member     | chr1q21              | lipid metabolic process                                              | ---                                    | 1.05          | 1.03            | -1.13     | 1.22        | -1.04     | -1.16       | 1.02       | 1.10         | -1.45      | -1.52        | -2.13      | -1.58        |
| THEM4     | thioesterase superfamily member     | chr1q21              | lipid metabolic process                                              | ---                                    | 1.23          | 1.27            | 1.08      | -1.02       | -1.05     | 1.03        | -1.05      | -1.24        | 1.43       | 1.10         | -1.38      | -1.39        |
| THEM4     | thioesterase superfamily member     | chr1q21              | lipid metabolic process                                              | ---                                    | -1.07         | -1.07           | 1.07      | -1.05       | 1.01      | -1.11       | 1.02       | 1.02         | -1.34      | -1.57        | -1.85      | -1.73        |
| THEM5     | thymocyte selection associated      | chr6q22.33           | multicellular organismal development                                 | ---                                    | -1.60         | 1.31            | 1.08      | 1.33        | -1.82     | -1.47       | 2.21       | 2.05         | 3.58       | 1.38         | -1.34      | -1.33        |
| THEM52    | thymocyte selection associated      | chr1p35.3            | inflammatory response                                                | ---                                    | 1.05          | 1.07            | -2.68     | 1.39        | -2.34     | -1.15       | -1.08      | -1.29        | 1.58       | 1.57         | 1.39       | 1.08         |
| THG1L     | tRNA-histidine guanylyltransferase  | chr5q33.3            | tRNA modification                                                    | ---                                    | 1.02          | -1.01           | -1.01     | -1.16       | -1.01     | -1.01       | 1.20       | 1.10         | -1.40      | -1.19        | -1.38      | -1.49        |
| THNSL1    | threonine synthase-like 1           | chr10p12.1           | threonine biosynthetic process                                       | ---                                    | -1.05         | -1.03           | -1.01     | -1.00       | 1.12      | 1.06        | -1.08      | -1.16        | -1.17      | 1.01         | 1.01       | 1.26         |
| THNSL1    | threonine synthase-like 1           | chr10p12.1           | threonine biosynthetic process                                       | ---                                    | 1.62          | 1.48            | -1.17     | -1.30       | -1.15     | 1.13        | -1.28      | -1.20        | -3.97      | -2.57        | -2.01      | -2.49        |
| THOC1     | THO complex 1                       | chr18p11.32          | transcription, DNA-dependent                                         | ---                                    | 1.10          | 1.12            | 1.05      | -1.03       | 1.07      | -1.08       | -1.02      | 1.00         | -1.57      | -1.75        | -1.16      | -1.38        |
| THOC2     | THO complex 2                       | chrXq25-q26.3        | mRNA processing                                                      | ---                                    | 1.13          | -1.01           | -1.04     | -1.04       | -1.08     | 1.09        | -1.14      | 1.02         | -2.81      | -2.07        | -2.38      | -2.24        |
| THOC7     | THO complex 7 homolog               | chr3p14.1            | mRNA processing                                                      | ---                                    | 1.21          | 1.19            | 1.03      | 1.02        | -1.15     | 1.07        | -1.23      | 1.03         | -1.16      | -1.13        | -1.26      | -1.41        |
| THPO      | thrombopoietin                      | chr3q27              | multicellular organismal development                                 | ---                                    | -7.78         | -2.30           | 1.73      | -1.31       | -2.09     | -2.95       | 1.17       | 1.31         | -1.50      | -2.76        | -1.75      | 1.12         |
| THRAP3    | thyroid hormone receptor associated | chr1p34.3            | regulation of alternative mRNA splicing                              | ---                                    | 1.12          | 1.09            | 1.01      | -1.01       | 1.01      | 1.05        | 1.09       | -1.08        | -1.64      | -1.51        | -1.73      | -2.26        |
| THRAP3    | thyroid hormone receptor associated | chr1p34.3            | regulation of alternative mRNA splicing                              | ---                                    | -1.32         | -1.26           | 1.04      | 1.04        | 1.22      | 1.11        | 1.26       | 1.10         | -1.74      | -1.67        | -1.85      | -1.83        |
| THRB      | thyroid hormone receptor            | chr3p24.2            | negative regulation of transcription from RNA polymerase II promoter | Nuclear_Receptors // GenMAPP           | 1.21          | 1.15            | 1.08      | 1.18        | 1.00      | 1.03        | -1.27      | -1.28        | -1.60      | -1.59        | -1.27      | -1.19        |
| THRB      | thyroid hormone receptor            | chr3p24.2            | negative regulation of transcription from RNA polymerase II promoter | Nuclear_Receptors // GenMAPP           | 1.09          | 1.05            | -1.04     | 1.06        | 1.01      | -1.03       | 1.03       | -1.07        | -1.57      | -1.76        | -1.13      | -1.21        |
| THRB      | thyroid hormone receptor            | chr3p24.2            | negative regulation of transcription from RNA polymerase II promoter | Nuclear_Receptors // GenMAPP           | 1.30          | 1.23            | 1.29      | 1.39        | -1.05     | 1.00        | 1.25       | -1.98        | 2.04       | 1.67         | 1.52       | 1.61         |
| THRB-IT1  | THRB intronic transcript 1          | ---                  | 0                                                                    | ---                                    | 1.01          | 1.14            | 1.20      | 1.19        | -1.05     | 1.11        | -1.36      | 1.05         | -1.58      | -1.43        | -1.67      | -1.68        |
| THSD4     | thrombospondin, type 1, domain 4    | chr15q23             | elastic fiber assembly                                               | ---                                    | -1.25         | -1.31           | 1.04      | -1.10       | -1.06     | 1.06        | 1.13       | 1.26         | 1.82       | 1.59         | 1.70       | 1.44         |
| THSD4     | thrombospondin, type 1, domain 4    | chr15q23             | elastic fiber assembly                                               | ---                                    | 1.30          | 1.86            | -1.08     | 1.02        | 1.07      | 1.13        | -1.00      | 1.63         | 4.25       | 3.18         | 3.82       | 3.52         |
| THSD4     | thrombospondin, type 1, domain 4    | chr15q23             | elastic fiber assembly                                               | ---                                    | 1.61          | 1.39            | 1.28      | 1.06        | 1.29      | 1.22        | 1.04       | 1.35         | 1.77       | 1.74         | 1.71       | 1.70         |
| THTPA     | thiamine triphosphatase             | chr14q11.2           | generation of precursor metabolites and energy                       | ---                                    | -1.01         | -1.04           | 1.07      | -1.08       | 1.12      | 1.09        | 1.02       | -1.03        | -1.70      | -1.68        | -1.52      | -1.67        |
| THUMPD1   | THUMP domain containing             | chr16p12.3           | 0                                                                    | ---                                    | 1.73          | 1.67            | 1.00      | -1.20       | -1.17     | -1.09       | -1.34      | -1.22        | -1.83      | -1.39        | -1.39      | -1.87        |
| THUMPD1   | THUMP domain containing             | chr16p12.3           | 0                                                                    | ---                                    | 1.10          | 1.03            | 1.05      | 1.19        | -1.01     | -1.03       | -1.13      | -1.26        | 1.03       | 1.00         | -1.17      | -1.23        |
| THUMPD2   | THUMP domain containing             | chr2p22.1;2p22-p21   | metabolic process                                                    | ---                                    | 1.21          | 1.18            | 1.06      | -1.05       | -1.03     | -1.03       | 1.07       | -1.07        | -1.06      | -1.17        | 1.63       | 1.30         |
| THUMPD3   | THUMP domain containing             | chr3p25.3            | methylation                                                          | ---                                    | -1.04         | -1.09           | -1.04     | 1.15        | 1.05      | -1.07       | 1.11       | 1.14         | 1.79       | 1.50         | 1.58       | 1.78         |
| THYN1     | thymocyte nuclear protein           | chr11q25             | 0                                                                    | ---                                    | -1.08         | -1.08           | -1.03     | -1.00       | -1.03     | -1.02       | 1.10       | 1.05         | -1.30      | -1.27        | -1.13      | 1.01         |
| THYN1     | thymocyte nuclear protein           | chr11q25             | 0                                                                    | ---                                    | 1.00          | -1.09           | 1.04      | -1.01       | 1.06      | 1.01        | -1.03      | 1.03         | -1.49      | -1.23        | -1.20      | -1.11        |
| TIA1      | TIA1 cytotoxic granule-associated   | chr2p13              | apoptotic process                                                    | ---                                    | 1.04          | 1.11            | -1.00     | -1.02       | -1.07     | -1.28       | -1.03      | 1.03         | 2.31       | 1.64         | 2.41       | 2.09         |
| TIA1      | TIA1 cytotoxic granule-associated   | chr2p13              | apoptotic process                                                    | ---                                    | 1.16          | 1.06            | 1.05      | 1.19        | -1.03     | 1.16        | -1.28      | 1.02         | -1.49      | -1.27        | -1.47      | -1.69        |
| TIA1      | TIA1 cytotoxic granule-associated   | chr2p13              | apoptotic process                                                    | ---                                    | 1.17          | 1.08            | -1.06     | 1.00        | -1.05     | 1.10        | -1.89      | -1.25        | -2.23      | -1.80        | -2.28      | -2.43        |
| TIA1      | TIA1 cytotoxic granule-associated   | chr2p13              | apoptotic process                                                    | ---                                    | 1.07          | 1.18            | -1.07     | -1.01       | -1.02     | -1.04       | -1.60      | -1.35        | -1.96      | -1.46        | -2.26      | -2.41        |
| TIA1      | TIA1 cytotoxic granule-associated   | chr2p13              | apoptotic process                                                    | ---                                    | -1.07         | 1.07            | 1.10      | 1.02        | 1.09      | 1.11        | -1.73      | -1.15        | -2.22      | -1.74        | -1.79      | -1.85        |
| TIAL1     | TIA1 cytotoxic granule-associated   | chr10q               | regulation of transcription from RNA polymerase II promoter          | ---                                    | 1.00          | -1.02           | 1.08      | 1.15        | 1.17      | -1.05       | 1.01       | -1.10        | -1.68      | -1.59        | -1.49      | -1.66        |
| TIAL1     | TIA1 cytotoxic granule-associated   | chr10q               | regulation of transcription from RNA polymerase II promoter          | ---                                    | 1.01          | 1.10            | 1.07      | 1.10        | 1.03      | 1.07        | 1.05       | 1.03         | 1.20       | 1.09         | 1.24       | 1.22         |
| TIAM2     | T-cell lymphoma invasion            | chr6q25.2            | apoptotic process                                                    | ---                                    | -1.27         | -1.61           | -1.03     | 1.09        | 1.10      | -1.04       | 1.27       | 1.33         | 1.72       | 1.59         | 1.94       | 1.84         |
| TICAM1    | toll-like receptor adaptor molecule | chr19p13.3           | toll-like receptor signaling pathway                                 | ---                                    | 1.12          | 1.06            | 1.17      | 1.03        | -1.18     | 1.01        | 1.33       | 1.10         | 1.93       | 1.43         | 1.81       | 1.54         |
| TICAM2    | toll-like receptor adaptor molecule | chr5q23.1            | toll-like receptor signaling pathway                                 | ---                                    | 1.05          | 1.03            | -1.05     | -1.30       | -1.06     | 1.07        | -1.26      | -1.02        | 1.30       | 1.32         | 1.70       | 1.48         |
| TICAM2    | toll-like receptor adaptor molecule | chr5q23.1            | toll-like receptor signaling pathway                                 | ---                                    | 1.25          | 1.23            | 1.01      | -1.29       | -1.28     | -1.31       | 1.09       | 1.56         | -1.02      | 1.11         | 1.89       | 1.64         |
| TIFA      | TRAF-interacting protein            | chr4q25              | I-kappaB kinase                                                      | ---                                    | 1.06          | -1.26           | -1.17     | -1.30       | -1.20     | -1.24       | 1.10       | 1.02         | 1.02       | 1.26         | 1.71       | 1.17         |
| TIGD1     | tigger transposable element         | chr2q37.1            | 0                                                                    | ---                                    | -1.09         | -1.07           | -1.01     | 1.34        | 1.03      | -1.14       | 1.06       | 1.04         | -1.42      | -1.47        | -1.40      | -1.07        |
| TIGD2     | tigger transposable element         | chr4q22.1            | 0                                                                    | ---                                    | 1.10          | 1.09            | 1.13      | 1.20        | 1.10      | 1.07        | 1.01       | -1.05        | -1.53      | -1.66        | -1.16      | -1.17        |
| TIGD5     | tigger transposable element         | chr8q24.3            | 0                                                                    | ---                                    | 1.17          | 1.03            | -1.06     | -1.15       | -1.20     | -1.16       | 1.19       | 1.16         | -2.22      | -1.88        | -1.76      | -1.38        |
| TIGD7     | tigger transposable element         | chr16p13.3           | 0                                                                    | ---                                    | 1.25          | 1.04            | 1.10      | -1.01       | 1.10      | -1.01       | -1.02      | -1.17        | -1.46      | -1.18        | 1.62       | 1.48         |
| TIGD7     | tigger transposable element         | chr16p13.3           | 0                                                                    | ---                                    | -1.23         | -1.41           | 1.14      | -1.16       | 1.10      | 1.02        | -1.17      | -1.06        | -1.01      | 1.13         | 1.29       | 1.61         |

| ID       | Gene Title                   | Chromosomal Location | 1st Gene Ontology Biological Process      | Pathway                                   | A2497 30 mins | A2497P' 30 mins | A2497 2 h | A2497P' 2 h | A2497 4 h | A2497P' 4 h | A2497 24 h | A2497P' 24 h | A2497 48 h | A2497P' 48 h | A2497 72 h | A2497P' 72 h |
|----------|------------------------------|----------------------|-------------------------------------------|-------------------------------------------|---------------|-----------------|-----------|-------------|-----------|-------------|------------|--------------|------------|--------------|------------|--------------|
| TIMELESS | timeless circadian clock     | chr12q13.3           | negative regulation of transcription from | ---                                       | 1.02          | -1.01           | 1.12      | 1.16        | -1.05     | 1.02        | 1.14       | 1.09         | -1.21      | -1.25        | -1.39      | -1.41        |
| TIMM10B  | translocase of inner mitoch  | chr11p15.4           | protein targeting to mitochondrion        | Apoptosis // GenMAPP                      | 1.07          | 1.08            | 1.01      | 1.14        | -1.06     | 1.07        | -1.14      | -1.19        | 1.02       | 1.06         | -1.25      | -1.21        |
| TIMM13   | translocase of inner mitoch  | chr19p13.3           | protein targeting to mitochondrion        | ---                                       | -1.05         | 1.07            | -1.04     | -1.02       | -1.05     | -1.11       | 1.25       | 1.20         | 1.22       | -1.02        | -1.12      | -1.10        |
| TIMM17A  | translocase of inner mitoch  | chr1q32.1            | protein targeting to mitochondrion        | ---                                       | 1.01          | 1.02            | -1.00     | -1.04       | 1.15      | 1.12        | 1.05       | -1.08        | 1.29       | 1.38         | 1.63       | 1.47         |
| TIMM17A  | translocase of inner mitoch  | chr1q32.1            | protein targeting to mitochondrion        | ---                                       | -1.04         | 1.01            | -1.08     | -1.07       | 1.00      | -1.01       | 1.03       | 1.03         | 1.21       | 1.14         | 1.10       | 1.14         |
| TIMM17B  | translocase of inner mitoch  | chrXp11.23           | protein targeting to mitochondrion        | ---                                       | -1.15         | -1.21           | -1.13     | -1.10       | 1.00      | 1.02        | 1.06       | -1.02        | 1.30       | 1.31         | 1.27       | 1.31         |
| TIMM17B  | translocase of inner mitoch  | chrXp11.23           | protein targeting to mitochondrion        | ---                                       | 1.60          | 2.01            | -1.25     | -1.25       | 1.22      | 1.22        | 2.95       | 1.45         | 3.29       | 1.08         | -1.32      | -1.88        |
| TIMM21   | translocase of inner mitoch  | chr18q22.3           | protein targeting to mitochondrion        | ---                                       | 1.00          | 1.00            | -1.11     | 1.01        | -1.08     | 1.09        | -1.22      | -1.05        | -1.21      | 1.02         | -1.09      | 1.01         |
| TIMM22   | translocase of inner mitoch  | chr17p13             | protein targeting to mitochondrion        | ---                                       | -1.06         | -1.01           | -1.03     | -1.16       | 1.05      | -1.07       | 1.09       | -1.02        | -1.04      | -1.06        | 1.11       | 1.16         |
| TIMM23   | translocase of inner mitoch  | chr10q11.23          | carbohydrate metabolic process            | ---                                       | 1.15          | 1.12            | -1.07     | 1.03        | 1.04      | 1.03        | 1.26       | 1.06         | -1.47      | -1.52        | -1.50      | -2.13        |
| TIMM8B   | translocase of inner mitoch  | chr11q23.1-q23.2     | protein targeting to mitochondrion        | ---                                       | -1.11         | -1.13           | -1.06     | -1.02       | 1.01      | -1.05       | 1.06       | 1.08         | 1.02       | -1.07        | -1.26      | -1.21        |
| TIMM8B   | translocase of inner mitoch  | chr11q23.1-q23.2     | protein targeting to mitochondrion        | ---                                       | -1.05         | -1.17           | 1.05      | 1.02        | 1.01      | -1.05       | 1.21       | 1.19         | 1.12       | 1.24         | 1.36       | 1.50         |
| TIMMDC1  | translocase of inner mitoch  | chr3q13.33           | 0                                         | ---                                       | 1.09          | 1.17            | -1.01     | -1.10       | 1.00      | -1.02       | -1.03      | -1.01        | -1.35      | -1.25        | -1.17      | -1.27        |
| TIMP1    | TIMP metalloproteinase inh   | chrXp11.3-p11.23     | cell activation                           | MAPK_Cascade // GenMAPP // Matrix_Me      | -1.08         | -1.09           | -1.03     | 1.02        | 1.01      | -1.04       | 1.14       | 1.01         | 1.57       | 1.23         | 1.24       | 1.25         |
| TIMP2    | TIMP metalloproteinase inh   | chr17q25             | central nervous system development        | Matrix_Metalloproteinases // GenMAPP      | -1.03         | 1.01            | -1.04     | -1.04       | -1.10     | -1.04       | -1.07      | -1.05        | -1.06      | -1.03        | -1.08      | -1.10        |
| TIMP2    | TIMP metalloproteinase inh   | chr17q25             | central nervous system development        | Matrix_Metalloproteinases // GenMAPP      | -1.04         | 1.02            | -1.05     | 1.01        | -1.01     | -1.04       | 1.09       | -1.02        | 1.17       | 1.04         | -1.06      | -1.03        |
| TIMP3    | TIMP metalloproteinase inh   | chr22q12.3           | central nervous system development        | Matrix_Metalloproteinases // GenMAPP      | 1.26          | 1.12            | 1.03      | -1.16       | 1.06      | 1.03        | -1.01      | -1.07        | 1.45       | 1.42         | 2.13       | 1.55         |
| TIMP3    | TIMP metalloproteinase inh   | chr22q12.3           | central nervous system development        | Matrix_Metalloproteinases // GenMAPP      | -1.04         | 1.18            | -1.06     | -1.37       | 1.14      | -1.02       | 1.00       | -1.22        | 1.21       | 1.26         | 1.99       | 1.76         |
| TIMP3    | TIMP metalloproteinase inh   | chr22q12.3           | central nervous system development        | Matrix_Metalloproteinases // GenMAPP      | -1.13         | -1.06           | 1.12      | -1.13       | -1.16     | 1.06        | 1.30       | 1.22         | 1.32       | 1.13         | 2.05       | 1.86         |
| TIMP3    | TIMP metalloproteinase inh   | chr22q12.3           | central nervous system development        | Matrix_Metalloproteinases // GenMAPP      | -1.08         | -1.01           | 1.22      | -1.32       | -1.30     | -1.08       | -1.05      | -1.08        | 1.09       | 1.07         | 1.60       | 1.48         |
| TINAGL1  | tubulointerstitial nephritis | chr1p35.2            | proteolysis                               | ---                                       | 1.26          | 1.05            | 1.10      | -1.08       | -1.30     | 1.08        | 1.03       | 1.81         | 1.52       | 1.45         | 1.37       | 1.37         |
| TINCR    | tissue differentiation-induc | chr19p13.3           | 0                                         | ---                                       | -1.00         | -1.05           | -1.04     | 1.08        | -1.24     | -1.29       | 1.32       | 1.30         | -5.60      | -3.16        | -1.51      | -1.20        |
| TINF2    | TERF1 (TRF1)-interacting     | chr14q12             | telomere maintenance                      | ---                                       | 1.02          | -1.02           | -1.07     | 1.09        | 1.22      | 1.36        | 1.04       | -1.06        | 1.09       | 1.21         | -1.24      | -1.03        |
| TINF2    | TERF1 (TRF1)-interacting     | chr14q12             | telomere maintenance                      | ---                                       | -1.05         | -1.08           | 1.05      | 1.16        | 1.06      | 1.05        | 1.01       | 1.07         | 1.04       | 1.10         | -1.04      | 1.21         |
| TINF2    | TERF1 (TRF1)-interacting     | chr14q12             | telomere maintenance                      | ---                                       | -1.06         | -1.07           | -1.11     | 1.01        | 1.19      | 1.08        | 1.09       | 1.03         | 1.36       | 1.17         | 1.37       | 1.66         |
| TIPARP   | TCDD-inducible poly(ADP      | chr3q25.31           | vasculogenesis                            | ---                                       | 1.17          | 1.25            | -1.04     | -1.02       | -1.02     | 1.07        | 1.02       | -1.13        | 1.29       | 1.37         | 1.68       | 1.34         |
| TIPIN    | TIMELESS interacting prot    | chr15q22.31          | DNA replication checkpoint                | ---                                       | 1.02          | 1.03            | 1.07      | 1.02        | 1.01      | -1.02       | -1.12      | -1.10        | -1.22      | -1.32        | 1.04       | 1.01         |
| TIPRL    | TIP41, TOR signaling path    | chr1q23.2            | DNA damage checkpoint                     | ---                                       | -1.12         | -1.07           | 1.01      | -1.12       | 1.17      | 1.14        | 1.11       | 1.12         | 1.08       | 1.13         | 1.27       | 1.29         |
| TIRAP    | toll-interleukin 1 receptor  | chr11q24.2           | toll-like receptor signaling pathway      | ---                                       | -1.03         | -1.34           | 1.06      | -1.26       | 1.55      | 1.14        | 1.21       | 1.30         | -1.73      | -1.53        | -1.32      | -1.13        |
| TIRAP    | toll-interleukin 1 receptor  | chr11q24.2           | toll-like receptor signaling pathway      | ---                                       | -1.20         | 1.35            | 1.82      | 1.74        | 1.15      | 1.16        | 1.72       | 1.03         | -2.76      | -1.04        | -1.68      | -3.86        |
| TIRAP    | toll-interleukin 1 receptor  | chr11q24.2           | toll-like receptor signaling pathway      | ---                                       | 1.48          | 1.31            | 1.11      | 1.04        | -1.10     | 1.00        | -1.17      | -1.03        | -2.19      | -2.01        | -1.54      | -1.73        |
| TJAP1    | tight junction associated pr | chr6p21.1            | 0                                         | ---                                       | -1.01         | -1.03           | 1.00      | 1.01        | 1.06      | 1.11        | 1.05       | -1.04        | -1.19      | -1.15        | 1.03       | -1.05        |
| TJAP1    | tight junction associated pr | chr6p21.1            | 0                                         | ---                                       | 1.02          | -1.03           | -1.04     | -1.11       | -1.09     | -1.05       | 1.17       | -1.06        | -1.36      | -1.17        | -1.03      | -1.19        |
| TJP1     | tight junction protein 1     | chr15q13             | blastocyst formation                      | ---                                       | -1.04         | 1.05            | -1.06     | -1.18       | -1.21     | -1.10       | -1.22      | -1.05        | -1.49      | -1.31        | -1.28      | -1.46        |
| TJP1     | tight junction protein 1     | chr15q13             | blastocyst formation                      | ---                                       | 1.08          | -1.19           | 1.03      | 1.25        | 1.22      | -1.15       | 1.18       | 1.10         | -1.09      | -1.26        | 1.21       | 1.35         |
| TJP3     | tight junction protein 3     | chr19p13.3           | regulation of G1                          | ---                                       | -1.03         | 1.18            | 1.46      | 1.95        | -1.42     | -1.37       | -1.26      | -1.19        | 2.07       | 1.68         | 2.61       | 2.42         |
| TJP3     | tight junction protein 3     | chr19p13.3           | regulation of G1                          | ---                                       | 1.02          | -1.07           | 1.17      | 1.41        | -1.24     | -1.09       | 1.18       | 1.33         | 2.12       | 1.50         | 2.08       | 1.92         |
| TK2      | thymidine kinase 2, mitoch   | chr16q22-q23.1       | nucleobase-containing compound metab      | ---                                       | 1.08          | 1.19            | 1.02      | -1.16       | 1.07      | -1.01       | -1.07      | -1.04        | -1.35      | -1.49        | -1.10      | -1.63        |
| TK2      | thymidine kinase 2, mitoch   | chr16q22-q23.1       | nucleobase-containing compound metab      | ---                                       | -1.39         | -1.01           | 1.10      | 1.25        | -1.36     | -1.05       | 1.83       | -1.36        | -1.24      | -1.21        | -1.05      | -1.07        |
| TKT      | transketolase                | chr3p14.3            | carbohydrate metabolic process            | Pentose_Phosphate_Pathway // GenMAPP      | -1.08         | -1.03           | -1.01     | 1.00        | 1.07      | -1.02       | 1.12       | 1.34         | 1.09       | 1.13         | 1.16       | 1.16         |
| TKT      | transketolase                | chr3p14.3            | carbohydrate metabolic process            | Pentose_Phosphate_Pathway // GenMAPP      | -1.14         | -1.21           | -1.10     | 1.21        | 1.14      | -1.02       | 1.17       | 1.24         | 1.31       | 1.39         | 1.53       | 1.58         |
| TLCD2    | TLC domain containing 2      | chr17p13.3           | 0                                         | ---                                       | 1.11          | -1.43           | 1.06      | 1.24        | 1.11      | 1.08        | 1.03       | 1.28         | 1.22       | 1.45         | 1.50       | 1.75         |
| TLCD2    | TLC domain containing 2      | chr17p13.3           | 0                                         | ---                                       | -1.03         | 1.18            | -1.07     | -1.29       | 1.23      | 1.26        | 1.66       | 1.62         | -1.25      | -1.01        | 1.23       | 1.42         |
| TLDC1    | TBC/LysM-associated dom      | chr16q24.1           | 0                                         | ---                                       | 1.12          | 1.05            | 1.27      | 1.03        | 1.15      | 1.26        | 1.04       | 1.04         | 1.72       | 1.81         | 1.52       | 1.69         |
| TLDC1    | TBC/LysM-associated dom      | chr16q24.1           | 0                                         | ---                                       | 1.26          | -1.01           | 1.02      | -1.12       | 1.09      | 1.29        | 1.40       | 1.05         | 1.91       | 1.75         | 2.68       | 2.18         |
| TLDC1    | TBC/LysM-associated dom      | chr16q24.1           | 0                                         | ---                                       | -1.32         | -1.02           | 1.02      | 1.02        | 1.20      | 1.12        | -1.05      | 1.17         | -1.11      | 1.19         | 1.78       | 1.40         |
| TLDC1    | TBC/LysM-associated dom      | chr16q24.1           | 0                                         | ---                                       | 1.00          | 1.11            | 1.53      | 1.27        | 1.20      | 1.18        | 1.30       | 1.16         | 1.78       | 1.75         | 1.44       | 1.65         |
| TLE1     | transducin-like enhancer of  | chr9q21.32           | negative regulation of transcription from | ---                                       | -1.04         | 1.10            | -1.08     | 1.06        | 1.55      | 1.02        | 1.12       | -1.28        | 1.69       | 1.66         | 2.15       | 1.76         |
| TLE2     | transducin-like enhancer of  | chr19p13.3           | transcription, DNA-dependent              | ---                                       | 1.42          | 1.21            | 1.02      | 1.12        | -1.69     | -1.29       | 1.03       | 1.06         | 1.37       | 1.20         | 1.16       | 1.63         |
| TLE2     | transducin-like enhancer of  | chr19p13.3           | transcription, DNA-dependent              | ---                                       | 1.14          | 1.02            | -1.00     | 1.24        | -1.31     | 1.03        | -1.08      | 1.05         | 1.14       | 1.21         | 1.08       | 1.51         |
| TLE3     | transducin-like enhancer of  | chr15q22             | transcription, DNA-dependent              | ---                                       | 1.01          | 1.06            | -1.10     | 1.21        | 1.06      | -1.11       | 1.21       | 1.08         | 1.79       | 1.37         | 1.72       | 2.03         |
| TLE3     | transducin-like enhancer of  | chr15q22             | transcription, DNA-dependent              | ---                                       | -1.14         | -1.04           | 1.08      | 1.16        | -1.02     | -1.11       | 1.20       | 1.38         | 1.94       | 1.61         | 1.62       | 1.81         |
| TLE4     | transducin-like enhancer of  | chr9q21.31           | negative regulation of transcription from | ---                                       | 1.05          | 1.04            | -1.00     | -1.06       | -1.05     | 1.10        | -1.40      | -1.05        | -2.67      | -2.01        | -1.72      | -1.75        |
| TLE6     | transducin-like enhancer of  | chr19p13.3           | regulation of transcription, DNA-depend   | ---                                       | 1.41          | 1.57            | 1.20      | -1.34       | -1.28     | 1.19        | 1.27       | -1.06        | 1.69       | 2.43         | 1.69       | 2.03         |
| TLE6     | transducin-like enhancer of  | chr19p13.3           | regulation of transcription, DNA-depend   | ---                                       | -1.17         | 1.03            | -1.42     | 1.07        | 1.07      | 1.20        | 1.01       | -1.18        | 2.03       | 2.15         | 2.02       | 2.29         |
| TLK1     | tousled-like kinase 1        | chr2q31.1            | regulation of chromatin assembly or disa  | ---                                       | -1.03         | -1.02           | -1.14     | -1.10       | -1.23     | -1.10       | -1.13      | 1.05         | -1.46      | -1.27        | -1.41      | -1.43        |
| TLK1     | tousled-like kinase 1        | chr2q31.1            | regulation of chromatin assembly or disa  | ---                                       | -1.00         | -1.10           | 1.26      | -1.07       | 1.21      | 1.08        | -1.06      | 1.28         | 1.35       | 1.22         | 1.38       | 1.43         |
| TLK2     | tousled-like kinase 2        | chr17q23             | regulation of chromatin assembly or disa  | ---                                       | -1.08         | -1.22           | -1.04     | -1.06       | 1.11      | 1.16        | 1.03       | -1.21        | -1.05      | -1.31        | 1.44       | 1.21         |
| TLI1     | tollid-like 1                | chr4q32-q33          | skeletal system development               | ---                                       | 1.07          | 1.05            | 1.47      | 1.49        | -1.13     | -1.20       | -1.14      | 1.26         | -2.94      | -2.53        | -3.84      | -2.56        |
| TLI2     | tollid-like 2                | chr10q23-q24         | proteolysis                               | ---                                       | -1.21         | -1.72           | 2.23      | 1.15        | 1.14      | 1.82        | 1.71       | 1.53         | 10.53      | 14.42        | 1.89       | 1.66         |
| TLN1     | taln 1                       | chr9p13              | platelet degranulation                    | Integrin-mediated_cell_adhesion_KEGG // C | -1.22         | 1.29            | -1.32     | 1.24        | -1.10     | -1.71       | -1.78      | -1.01        | -1.11      | -1.16        | -3.38      | 1.39         |
| TLN2     | taln 2                       | chr15q15-q21         | cytoskeletal anchoring at plasma membr    | ---                                       | -1.24         | -1.13           | -1.04     | -1.12       | -1.00     | 1.06        | -1.24      | -1.08        | -1.40      | -1.39        | -1.47      | -1.82        |
| TLR10    | toll-like receptor 10        | chr4p14              | toll-like receptor signaling pathway      | ---                                       | -1.08         | 1.89            | 1.22      | -1.03       | -1.75     | -1.04       | -2.86      | -1.17        | 1.47       | -1.86        | -2.93      | -5.13        |
| TLR3     | toll-like receptor 3         | chr4q35              | positive regulation of cytokine productio | ---                                       | 1.10          | 1.21            | 1.01      | -1.08       | 1.20      | 1.02        | -1.01      | -1.29        | -1.44      | -1.14        | -1.65      | -1.65        |
| TLR4     | toll-like receptor 4         | chr9q33.1            | activation of MAPK activity               | ---                                       | -1.02         | 1.17            | -1.29     | 1.16        | -1.05     | 1.05        | -1.34      | 1.04         | -2.56      | -2.51        | -2.83      | -2.51        |
| TLR4     | toll-like receptor 4         | chr9q33.1            | activation of MAPK activity               | ---                                       | 1.07          | -1.03           | 1.04      | 1.04        | 1.07      | -1.10       | 1.68       | 1.91         | -2.20      | -1.79        | -3.26      | -2.75        |

| ID       | Gene Title                  | Chromosomal Location | 1st Gene Ontology Biological Process      | Pathway                             | A2497 30 mins | A2497P' 30 mins | A2497 2 h | A2497P' 2 h | A2497 4 h | A2497P' 4 h | A2497 24 h | A2497P' 24 h | A2497 48 h | A2497P' 48 h | A2497 72 h | A2497P' 72 h |
|----------|-----------------------------|----------------------|-------------------------------------------|-------------------------------------|---------------|-----------------|-----------|-------------|-----------|-------------|------------|--------------|------------|--------------|------------|--------------|
| TLR4     | toll-like receptor 4        | chr9q33.1            | activation of MAPK activity               | ---                                 | -1.32         | -1.26           | 1.17      | 1.08        | -1.08     | -1.04       | -1.18      | -1.18        | -2.60      | -2.91        | -1.56      | -1.99        |
| TLR6     | toll-like receptor 6        | chr4p14              | toll-like receptor signaling pathway      | ---                                 | -1.24         | -1.21           | -1.12     | 1.05        | -1.15     | -1.65       | -1.05      | -1.26        | -1.58      | -1.43        | -1.27      | -1.36        |
| TLR8     | toll-like receptor 8        | chrXp2.2             | toll-like receptor signaling pathway      | ---                                 | 2.03          | 1.33            | -1.09     | 1.03        | -1.09     | -1.20       | 1.09       | 1.11         | 2.07       | 2.07         | -1.08      | 1.96         |
| TM2D1    | TM2 domain containing 1     | chr1p31.3            | apoptotic process                         | ---                                 | 1.59          | 1.66            | -1.04     | -1.07       | 1.01      | -1.02       | 1.14       | 1.58         | 1.54       | 1.10         | 1.32       | -1.04        |
| TM2D3    | TM2 domain containing 3     | chr15q26.3           | 0                                         | ---                                 | -1.02         | 1.10            | -1.01     | -1.08       | 1.11      | -1.05       | 1.03       | -1.08        | 1.08       | -1.02        | 1.06       | -1.03        |
| TM2D3    | TM2 domain containing 3     | chr15q26.3           | 0                                         | ---                                 | -1.02         | -1.09           | -1.06     | 1.01        | -1.03     | 1.08        | -1.11      | -1.03        | -1.16      | -1.00        | -1.17      | -1.29        |
| TM4SF1   | transmembrane 4 L six fam   | chr3q21-q25          | 0                                         | ---                                 | 1.03          | 1.07            | -1.06     | -1.14       | -1.01     | -1.03       | 1.31       | 1.08         | 1.61       | 1.27         | 1.42       | 1.21         |
| TM4SF20  | transmembrane 4 L six fam   | chr2q36.3            | 0                                         | ---                                 | -1.50         | -2.56           | 1.21      | 2.31        | -3.09     | -1.68       | -3.64      | 1.11         | 1.40       | -3.70        | -2.33      | 1.06         |
| TM7SF3   | transmembrane 7 superfam    | chr12q11-q12         | 0                                         | ---                                 | 1.45          | 1.29            | 1.06      | -1.01       | 1.07      | 1.23        | -1.30      | -1.12        | -2.08      | -1.52        | -2.38      | -2.31        |
| TM7SF3   | transmembrane 7 superfam    | chr12q11-q12         | 0                                         | ---                                 | 1.10          | 1.07            | 1.18      | -1.02       | -1.25     | 1.05        | -1.09      | -1.21        | -1.22      | -1.11        | -1.82      | -2.12        |
| TM7SF3   | transmembrane 7 superfam    | chr12q11-q12         | 0                                         | ---                                 | -1.04         | 1.00            | 1.03      | -1.05       | 1.03      | -1.03       | 1.12       | 1.01         | 1.01       | -1.01        | -1.22      | -1.23        |
| TM9SF1   | transmembrane 9 superfam    | chr14q11.2           | autophagy                                 | ---                                 | -1.29         | -1.43           | 1.27      | 1.17        | 1.32      | 1.09        | -1.15      | 1.03         | -1.30      | -1.11        | -1.25      | -1.12        |
| TM9SF2   | transmembrane 9 superfam    | chr13q32.3           | transport                                 | ---                                 | -1.04         | 1.09            | -1.02     | -1.14       | -1.13     | -1.04       | -1.07      | -1.03        | -1.44      | -1.35        | -1.06      | -1.11        |
| TM9SF4   | transmembrane 9 superfam    | chr20q11.21          | 0                                         | ---                                 | -1.04         | -1.04           | -1.03     | 1.03        | -1.07     | 1.15        | 1.02       | 1.74         | 1.68       | 2.21         | 2.38       | ---          |
| TM9SF4   | transmembrane 9 superfam    | chr20q11.21          | 0                                         | ---                                 | 1.08          | 1.09            | 1.15      | 1.01        | 1.08      | -1.00       | -1.01      | -1.13        | 1.21       | 1.22         | 1.35       | 1.33         |
| TMA7     | translation machinery assoc | chr3p21.31           | 0                                         | ---                                 | 1.07          | 1.04            | -1.09     | -1.04       | -1.04     | 1.01        | -1.06      | 1.20         | 1.19       | 1.06         | -1.01      | ---          |
| TMBIM1   | transmembrane BAX inhibi    | chr2q35              | 0                                         | ---                                 | 1.05          | 1.03            | 1.07      | -1.04       | 1.14      | 1.09        | 1.22       | 1.03         | 2.50       | 1.93         | 2.14       | 2.13         |
| TMBIM4   | transmembrane BAX inhibi    | chr12q14.1-q15       | apoptotic process                         | ---                                 | -1.12         | -1.00           | -1.00     | -1.06       | -1.00     | 1.08        | -1.07      | -1.01        | -1.18      | 1.03         | -1.48      | -1.34        |
| TMBIM4   | transmembrane BAX inhibi    | chr12q14.1-q15       | apoptotic process                         | ---                                 | -1.06         | -1.01           | -1.04     | -1.02       | -1.06     | 1.01        | -1.08      | -1.07        | -1.12      | 1.05         | -1.56      | -1.44        |
| TMBIM4   | transmembrane BAX inhibi    | chr12q14.1-q15       | apoptotic process                         | ---                                 | -1.01         | -1.05           | -1.02     | 1.06        | -1.26     | -1.36       | 1.31       | 1.10         | 1.84       | 1.20         | 1.62       | 1.63         |
| TMBIM4   | transmembrane BAX inhibi    | chr12q14.1-q15       | apoptotic process                         | ---                                 | 1.16          | 1.14            | -1.06     | -1.13       | 1.00      | 1.31        | -1.05      | -1.03        | -1.31      | -1.24        | -1.09      | -1.24        |
| TMC1     | transmembrane channel-like  | chr9q21.12           | transport                                 | ---                                 | 1.60          | -1.31           | -2.21     | 1.66        | -2.86     | -1.15       | -2.85      | -1.03        | 1.07       | 1.14         | 1.31       | 1.62         |
| TMC5     | transmembrane channel-like  | chr16p12.3           | transport                                 | ---                                 | 1.19          | -1.13           | 1.24      | 1.28        | 1.04      | -1.24       | -1.11      | 1.04         | -2.50      | -2.13        | -1.35      | -1.51        |
| TMC6     | transmembrane channel-like  | chr17q25.3           | transport                                 | ---                                 | 1.03          | 1.12            | 1.10      | 1.08        | -1.52     | -1.79       | 1.56       | 1.95         | 1.73       | 1.99         | 1.46       | 2.38         |
| TMC6     | transmembrane channel-like  | chr17q25.3           | transport                                 | ---                                 | 1.76          | 1.74            | 1.43      | -2.28       | 1.37      | 2.58        | -2.26      | 1.19         | 4.20       | 3.19         | 2.04       | 2.58         |
| TMC22    | transmembrane and coiled-   | chr1q32.1            | vesicle-mediated transport                | ---                                 | -1.39         | -1.52           | -1.44     | 1.34        | -1.10     | -1.13       | -1.01      | 1.02         | -1.31      | -1.24        | -1.44      | -1.24        |
| TMCOS5B  | transmembrane and coiled-   | chr15q13.3           | 0                                         | ---                                 | -1.24         | 1.34            | 1.46      | -1.03       | -1.34     | 2.83        | 1.14       | 1.50         | 3.47       | 3.90         | -1.30      | -1.24        |
| TMED1    | transmembrane emp24 prot    | chr19p13.2           | transport                                 | ---                                 | -1.09         | -1.16           | -1.01     | -1.03       | 1.06      | 1.23        | 1.25       | 1.08         | 1.63       | 1.44         | 1.63       | 1.80         |
| TMED10   | transmembrane emp24-like    | chr14q24.3           | response to acid                          | mRNA_processing_Reactome // GenMAPP | 1.48          | 1.43            | 1.25      | 1.01        | -1.08     | -1.06       | 1.55       | 1.52         | -1.40      | -1.07        | -2.00      | -1.18        |
| TMED2    | transmembrane emp24 dom     | chr12q24.31          | in utero embryonic development            | ---                                 | -1.01         | 1.02            | 1.17      | -1.01       | -1.12     | -1.28       | -1.39      | -1.23        | 1.88       | 1.75         | 1.95       | 1.45         |
| TMED2    | transmembrane emp24 dom     | chr12q24.31          | in utero embryonic development            | ---                                 | 1.16          | 1.16            | 1.03      | -1.14       | -1.23     | -1.08       | 1.23       | 1.06         | -1.13      | -1.02        | 1.57       | 1.52         |
| TMED3    | transmembrane emp24 prot    | chr15q24-q25         | transport                                 | ---                                 | -1.01         | -1.03           | 1.01      | 1.06        | -1.00     | -1.07       | 1.23       | 1.13         | 1.39       | 1.13         | 1.39       | 1.45         |
| TMED4    | transmembrane emp24 prot    | chr7p13              | transport                                 | ---                                 | -1.02         | 1.07            | -1.03     | -1.05       | 1.01      | 1.06        | -1.06      | -1.03        | -1.42      | -1.05        | -2.54      | -1.95        |
| TMED5    | transmembrane emp24 prot    | chr1pter-q31.3       | transport                                 | ---                                 | -1.05         | -1.04           | 1.02      | -1.01       | 1.15      | 1.02        | -1.30      | -1.03        | 1.18       | 1.19         | 1.49       | 1.38         |
| TMED5    | transmembrane emp24 prot    | chr1pter-q31.3       | transport                                 | ---                                 | -1.00         | -1.00           | -1.03     | 1.00        | 1.09      | 1.02        | 1.01       | -1.02        | 1.28       | 1.32         | 1.86       | 1.92         |
| TMED5    | transmembrane emp24 prot    | chr1pter-q31.3       | transport                                 | ---                                 | 1.09          | -1.08           | 1.10      | 1.20        | -1.11     | -1.02       | -1.41      | -1.14        | 1.25       | 1.21         | 1.10       | 1.23         |
| TMED9    | transmembrane emp24 prot    | chr5q35.3            | transport                                 | ---                                 | 1.00          | -1.11           | 1.05      | -1.06       | -1.00     | 1.18        | 1.08       | 1.00         | 1.54       | 1.37         | 1.84       | 1.92         |
| TMED9    | transmembrane emp24 prot    | chr5q35.3            | xenobiotic metabolic process              | ---                                 | -1.01         | 1.00            | -1.02     | 1.07        | 1.05      | -1.04       | 1.18       | 1.13         | 1.52       | 1.36         | 1.40       | 1.51         |
| TMEFF2   | transmembrane protein with  | chr2q32.3            | 0                                         | ---                                 | -1.12         | -1.33           | -1.13     | -1.64       | 1.07      | -1.10       | -2.40      | -1.04        | -5.07      | -1.94        | -2.62      | -2.50        |
| TMEM101  | transmembrane protein 101   | chr17q21.31          | signal transduction                       | ---                                 | -1.10         | -1.06           | 1.06      | 1.01        | 1.11      | 1.01        | 1.23       | 1.09         | 1.36       | 1.17         | 1.22       | 1.24         |
| TMEM104  | transmembrane protein 104   | chr17q25.1           | 0                                         | ---                                 | 1.09          | -1.04           | -1.07     | 1.13        | -1.25     | -1.20       | -1.09      | -1.11        | 1.16       | -1.07        | 1.17       | 1.38         |
| TMEM106A | transmembrane protein 106   | chr17q21.31          | 0                                         | ---                                 | -1.36         | -1.82           | -1.07     | -1.35       | 1.33      | -1.06       | -1.64      | -1.87        | 1.52       | 1.37         | 1.14       | 1.45         |
| TMEM106A | transmembrane protein 106   | chr17q21.31          | 0                                         | ---                                 | -1.19         | -1.22           | 1.02      | 1.03        | 1.27      | 1.25        | 1.04       | 1.04         | 1.57       | 1.24         | 2.14       | 2.03         |
| TMEM106B | transmembrane protein 106   | chr7p21.3            | 0                                         | ---                                 | 1.11          | 1.02            | -1.02     | -1.00       | -1.12     | -1.00       | -1.20      | 1.01         | -2.03      | -1.65        | -1.62      | -1.92        |
| TMEM106B | transmembrane protein 106   | chr7p21.3            | 0                                         | ---                                 | 1.22          | 1.16            | 1.08      | 1.07        | -1.08     | -1.02       | -1.49      | -1.39        | -2.01      | -1.67        | -1.94      | -2.22        |
| TMEM106B | transmembrane protein 106   | chr7p21.3            | 0                                         | ---                                 | 1.24          | 1.14            | 1.08      | 1.13        | -1.07     | 1.21        | -1.03      | 1.38         | -2.30      | -1.74        | -1.88      | -2.74        |
| TMEM107  | transmembrane protein 107   | chr17p13.1           | multicellular organismal development      | ---                                 | 1.34          | 1.24            | -1.02     | -1.06       | 1.44      | 1.33        | -1.10      | -1.18        | -1.46      | -1.42        | -1.96      | -1.42        |
| TMEM107  | transmembrane protein 107   | chr17p13.1           | multicellular organismal development      | ---                                 | -1.11         | -1.15           | 1.08      | 1.08        | 1.04      | 1.06        | 1.15       | 1.07         | -1.00      | 1.22         | -1.04      | 1.28         |
| TMEM107  | transmembrane protein 107   | chr17p13.1           | multicellular organismal development      | ---                                 | -1.00         | 1.03            | 1.18      | 1.20        | 1.05      | 1.12        | 1.33       | 1.02         | 1.15       | 1.28         | -1.03      | 1.18         |
| TMEM107  | transmembrane protein 107   | chr17p13.1           | multicellular organismal development      | ---                                 | 1.20          | 1.16            | -1.03     | 1.08        | 1.09      | 1.12        | -1.25      | -1.32        | -1.73      | -1.49        | -1.83      | -1.33        |
| TMEM107  | transmembrane protein 107   | chr17p13.1           | multicellular organismal development      | ---                                 | 1.02          | 1.08            | 1.29      | 1.54        | -1.11     | 1.27        | -1.91      | -1.36        | -1.75      | -1.06        | -1.59      | -1.23        |
| TMEM108  | transmembrane protein 108   | chr3q21              | 0                                         | ---                                 | -2.63         | -1.92           | 2.08      | 1.12        | -1.17     | -1.19       | -1.29      | 2.13         | 1.16       | 1.09         | -2.91      | -1.19        |
| TMEM11   | transmembrane protein 11    | chr17p11.2           | mitochondrion organization                | ---                                 | -1.03         | -1.05           | 1.07      | 1.04        | 1.05      | -1.08       | 1.21       | -1.01        | 1.89       | 1.50         | 1.53       | 1.46         |
| TMEM110  | transmembrane protein 110   | chr3p21.1            | 0                                         | ---                                 | -1.18         | -1.08           | -1.08     | -1.02       | 1.01      | -1.11       | 1.15       | 1.01         | -1.82      | -1.52        | -1.48      | -1.48        |
| TMEM117  | transmembrane protein 117   | chr12q12             | 0                                         | ---                                 | 1.13          | 1.15            | -1.07     | 1.04        | -1.21     | -1.22       | -1.24      | -1.05        | -2.24      | -2.24        | -2.60      | -3.30        |
| TMEM120A | transmembrane protein 120   | chr7q11.23           | 0                                         | ---                                 | 1.07          | -1.04           | 1.17      | 1.02        | 1.02      | 1.07        | 1.09       | 1.07         | 1.46       | 1.47         | 1.61       | 1.71         |
| TMEM120B | transmembrane protein 120   | chr12q24.31          | 0                                         | ---                                 | -1.25         | -1.64           | -1.36     | -1.12       | -2.49     | -1.17       | -1.24      | 1.32         | -1.02      | -1.29        | 1.36       | -1.21        |
| TMEM126B | transmembrane protein 126   | chr11q14.1           | 0                                         | ---                                 | 1.19          | 1.15            | -1.05     | -1.22       | 1.23      | -1.07       | 1.10       | 1.14         | -1.27      | -1.43        | -1.35      | -2.38        |
| TMEM127  | transmembrane protein 127   | chr2q11.2            | negative regulation of cell proliferation | ---                                 | 1.25          | 1.23            | -1.04     | -1.10       | -1.14     | -1.17       | 1.32       | -1.22        | -1.10      | -2.21        | -1.15      | -1.56        |
| TMEM127  | transmembrane protein 127   | chr2q11.2            | negative regulation of cell proliferation | ---                                 | 1.01          | 1.05            | -1.01     | -1.14       | 1.04      | 1.04        | -1.10      | 1.02         | -2.00      | -1.64        | -1.58      | -1.66        |
| TMEM131  | transmembrane protein 131   | chr2q11.2            | 0                                         | ---                                 | 1.35          | 1.18            | 1.25      | 1.21        | 1.03      | 1.01        | -1.33      | -1.20        | -1.39      | -1.38        | -1.50      | -1.40        |
| TMEM133  | transmembrane protein 133   | chr11q22.1           | 0                                         | ---                                 | -1.04         | 1.10            | -1.06     | -1.34       | 1.14      | 1.09        | -1.09      | -1.17        | -2.01      | -1.79        | -2.44      | -1.95        |
| TMEM134  | transmembrane protein 134   | chr11q13.2           | 0                                         | ---                                 | -1.24         | -1.13           | 1.02      | 1.05        | -1.25     | 1.06        | 1.11       | -1.01        | 1.34       | 1.47         | 1.21       | 1.09         |
| TMEM134  | transmembrane protein 134   | chr11q13.2           | 0                                         | ---                                 | 1.11          | 1.05            | 1.16      | 1.02        | 1.00      | -1.00       | 1.32       | 1.22         | 1.38       | 1.36         | 1.52       | 1.49         |
| TMEM135  | transmembrane protein 135   | chr11q14.2           | peroxisome organization                   | ---                                 | 1.17          | 1.16            | 1.07      | -1.19       | 1.03      | -1.03       | -1.05      | -1.18        | -1.64      | -1.20        | 1.05       | -1.07        |
| TMEM136  | transmembrane protein 136   | chr11q23.3           | 0                                         | ---                                 | -1.16         | -1.26           | -1.03     | 1.02        | 1.18      | -1.00       | -1.26      | -1.04        | -1.58      | -1.47        | -1.13      | -1.22        |

| ID       | Gene Title                | Chromosomal Location  | 1st Gene Ontology Biological Process | Pathway | A2497 30 mins | A2497P' 30 mins | A2497 2 h | A2497P' 2 h | A2497 4 h | A2497P' 4 h | A2497 24 h | A2497P' 24 h | A2497 48 h | A2497P' 48 h | A2497 72 h | A2497P' 72 h |
|----------|---------------------------|-----------------------|--------------------------------------|---------|---------------|-----------------|-----------|-------------|-----------|-------------|------------|--------------|------------|--------------|------------|--------------|
| TMEM139  | transmembrane protein 139 | chr7q34               | 0                                    | ---     | -1.08         | -1.05           | -1.11     | -1.02       | 1.29      | 1.21        | 1.47       | 1.21         | -2.36      | -2.67        | -2.28      | -2.29        |
| TMEM139  | transmembrane protein 139 | chr7q34               | 0                                    | ---     | 1.36          | 1.20            | 1.04      | 1.35        | 1.03      | -1.03       | 1.15       | 1.43         | -1.53      | -1.34        | -1.98      | -1.63        |
| TMEM140  | transmembrane protein 140 | chr7q33               | 0                                    | ---     | 1.12          | 1.43            | -1.65     | -1.14       | 1.08      | 1.01        | -1.58      | 1.03         | -2.98      | -1.91        | -1.06      | -1.41        |
| TMEM144  | transmembrane protein 144 | chr4q32.1             | carbohydrate transmembrane transport | ---     | 1.08          | 1.12            | 1.10      | -1.04       | -1.05     | -1.04       | -1.00      | -1.10        | -1.20      | 1.05         | -1.64      | -1.77        |
| TMEM144A | transmembrane protein 144 | chr6p12.2             | 0                                    | ---     | 1.13          | 1.14            | 1.01      | -1.12       | -1.11     | -1.06       | -1.25      | -1.07        | -1.21      | -1.06        | -1.52      | -1.85        |
| TMEM14B  | transmembrane protein 14B | chr6p25.1-p23         | 0                                    | ---     | -1.02         | 1.01            | 1.00      | 1.01        | -1.17     | -1.11       | -1.12      | 1.09         | -1.05      | -1.01        | -1.39      | -1.38        |
| TMEM14B  | transmembrane protein 14B | chr6p25.1-p23         | 0                                    | ---     | 1.01          | -1.00           | 1.04      | 1.04        | -1.01     | 1.14        | -1.04      | -1.09        | -1.41      | -1.17        | -1.36      | -1.47        |
| TMEM14C  | transmembrane protein 14C | chr6p24.2             | heme biosynthetic process            | ---     | -1.02         | 1.13            | -1.09     | -1.10       | -1.09     | -1.08       | -1.00      | 1.05         | -1.00      | 1.05         | -1.12      | -1.05        |
| TMEM150A | transmembrane protein 150 | chr2p11.2             | catabolic process                    | ---     | -1.15         | -1.18           | 1.06      | 1.01        | 1.39      | 1.14        | 1.18       | -1.02        | -1.53      | -1.60        | -1.72      | -1.79        |
| TMEM154  | transmembrane protein 154 | chr4q31.3             | 0                                    | ---     | 1.08          | 1.11            | -1.09     | -1.01       | 1.08      | -1.05       | -1.19      | 1.08         | 2.61       | 1.91         | 2.14       | 1.42         |
| TMEM156  | transmembrane protein 156 | chr4p14               | 0                                    | ---     | 1.08          | 1.20            | -1.43     | -1.39       | 1.03      | -1.01       | -1.12      | -1.02        | 2.47       | 1.50         | 2.38       | 1.43         |
| TMEM156  | transmembrane protein 156 | chr4p14               | 0                                    | ---     | -1.08         | -1.04           | -1.32     | 1.00        | -1.01     | -1.13       | -1.01      | 1.10         | 1.67       | 1.31         | 1.51       | 1.29         |
| TMEM158  | transmembrane protein 158 | chr3p21.3             | 0                                    | ---     | 1.24          | 1.02            | 1.04      | -1.02       | 1.05      | 1.00        | 1.33       | 1.27         | 2.28       | 1.96         | 2.37       | 2.15         |
| TMEM159  | transmembrane protein 159 | chr16p12              | 0                                    | ---     | 1.51          | 1.49            | -1.17     | -1.07       | -1.04     | -1.29       | -1.06      | 1.10         | 1.12       | 1.15         | 1.32       | 1.31         |
| TMEM161B | TMEM161B antisense RN     | ---                   | 0                                    | ---     | -1.19         | -1.09           | -1.03     | -1.27       | 1.13      | 1.01        | 1.05       | 1.17         | 2.23       | 2.24         | 2.59       | 2.55         |
| TMEM164  | transmembrane protein 164 | chrXq22.3             | 0                                    | ---     | -1.01         | 1.02            | 1.00      | -1.13       | -1.08     | -1.00       | -1.24      | -1.07        | 1.12       | 1.22         | 1.02       | 1.10         |
| TMEM164  | transmembrane protein 164 | chrXq22.3             | 0                                    | ---     | 1.05          | 1.10            | -1.06     | -1.18       | 1.03      | 1.25        | -1.19      | 1.06         | -1.15      | 1.16         | -1.27      | -1.11        |
| TMEM164  | transmembrane protein 164 | chrXq22.3             | 0                                    | ---     | -1.02         | -1.09           | 1.03      | -1.06       | 1.02      | 1.00        | -1.07      | 1.03         | 1.05       | 1.12         | 1.01       | -1.00        |
| TMEM165  | transmembrane protein 165 | chr4q12               | protein N-linked glycosylation       | ---     | 1.08          | 1.03            | -1.09     | -1.09       | -1.17     | 1.00        | -1.29      | -1.09        | -1.34      | -1.14        | -1.09      | -1.22        |
| TMEM167A | transmembrane protein 167 | chr5q14.2             | 0                                    | ---     | 1.11          | 1.02            | -1.02     | -1.01       | -1.01     | 1.11        | -1.07      | -1.12        | 1.23       | 1.37         | 1.69       | 1.69         |
| TMEM167A | transmembrane protein 167 | chr5q14.2             | 0                                    | ---     | -1.18         | 1.00            | 1.09      | 1.10        | 1.03      | 1.02        | -1.10      | -1.10        | 1.10       | 1.21         | 1.08       | 1.39         |
| TMEM167B | transmembrane protein 167 | chr1p13.3             | 0                                    | ---     | 1.02          | -1.01           | 1.09      | -1.04       | 1.09      | 1.05        | 1.09       | 1.00         | 1.54       | 1.47         | 1.83       | 1.63         |
| TMEM168  | transmembrane protein 168 | chr7q31.32            | 0                                    | ---     | 1.37          | 1.29            | -1.05     | 1.00        | 1.07      | 1.09        | -1.48      | -1.30        | -1.69      | -1.38        | -1.35      | -1.52        |
| TMEM169  | transmembrane protein 169 | chr2q35               | 0                                    | ---     | -1.94         | -1.15           | 1.06      | -1.17       | 1.12      | -1.45       | 4.64       | 3.35         | 4.97       | 3.91         | -2.31      | -1.98        |
| TMEM170B | transmembrane protein 170 | chr6p24.2             | 0                                    | ---     | 1.08          | -1.02           | 1.01      | -1.12       | 1.02      | 1.19        | -1.27      | -1.08        | -2.70      | -2.33        | -1.47      | -1.64        |
| TMEM171  | transmembrane protein 171 | chr5q13.2             | 0                                    | ---     | 1.22          | -2.04           | -2.89     | -2.59       | -1.82     | -1.73       | 3.02       | -3.02        | 3.83       | 15.49        | 1.56       | 3.99         |
| TMEM173  | transmembrane protein 173 | chr5q31.2             | activation of innate immune response | ---     | -1.25         | -1.40           | 1.12      | 1.16        | 1.04      | -1.03       | 1.07       | -1.07        | 1.23       | 1.09         | 1.04       | 1.17         |
| TMEM175  | transmembrane protein 175 | chr4p16.3             | 0                                    | ---     | -1.21         | -1.67           | -1.09     | -1.05       | -1.93     | -1.61       | 1.57       | 1.02         | -1.18      | -1.15        | -2.41      | -1.36        |
| TMEM177  | transmembrane protein 177 | chr2q14.2             | 0                                    | ---     | -1.61         | 1.07            | 2.11      | -1.27       | 1.35      | -2.24       | 1.14       | 1.25         | -1.54      | -2.03        | -2.97      | -1.29        |
| TMEM177  | transmembrane protein 177 | chr2q14.2             | 0                                    | ---     | 1.01          | -1.02           | 1.08      | 1.13        | 1.10      | 1.02        | -1.19      | 1.08         | -1.11      | -1.23        | -1.42      | -1.28        |
| TMEM178B | transmembrane protein 178 | chr7q34               | 0                                    | ---     | 2.81          | 3.44            | -1.23     | -1.16       | 1.34      | 2.75        | 1.04       | -1.45        | 7.05       | 7.92         | -3.48      | -2.06        |
| TMEM179B | transmembrane protein 179 | chr11q12.3            | 0                                    | ---     | -1.05         | -1.08           | -1.02     | 1.01        | 1.12      | 1.03        | -1.04      | -1.04        | -1.25      | -1.23        | -1.44      | -1.20        |
| TMEM18   | transmembrane protein 18  | chr2p25.3             | transcription, DNA-dependent         | ---     | -1.14         | -1.06           | 1.08      | 1.20        | -1.12     | 1.03        | -1.09      | -1.05        | -1.29      | 1.04         | 1.23       | 1.72         |
| TMEM180  | transmembrane protein 180 | chr10q24.32           | 0                                    | ---     | -1.01         | -1.03           | -1.01     | -1.07       | 1.09      | 1.08        | 1.05       | -1.02        | -2.35      | -1.74        | -1.83      | -1.89        |
| TMEM182  | transmembrane protein 182 | chr2q12.1             | 0                                    | ---     | -1.05         | -1.34           | -1.58     | -1.11       | -1.83     | -1.34       | 1.39       | 1.16         | 1.18       | 1.36         | 1.79       | 1.50         |
| TMEM182  | transmembrane protein 182 | chr2q12.1             | 0                                    | ---     | 1.03          | -1.04           | -1.01     | -1.05       | 1.03      | -1.13       | 1.28       | 1.43         | 1.01       | -1.25        | 1.22       | -1.01        |
| TMEM182  | transmembrane protein 182 | chr2q12.1             | 0                                    | ---     | 1.24          | 1.09            | 1.33      | -1.44       | -1.72     | -1.37       | 1.47       | 1.58         | 2.91       | 1.97         | 1.29       | 1.32         |
| TMEM182  | transmembrane protein 182 | chr2q12.1             | 0                                    | ---     | 1.47          | 1.18            | -1.91     | -1.62       | -1.50     | -1.22       | 1.15       | -1.42        | 1.36       | 1.62         | -1.13      | -1.31        |
| TMEM183A | transmembrane protein 183 | chr1q32.1 /// chr3q20 | 0                                    | ---     | -1.10         | 1.00            | 1.02      | 1.05        | 1.06      | -1.15       | 1.16       | 1.04         | 1.25       | 1.24         | 1.24       | 1.17         |
| TMEM183A | transmembrane protein 183 | chr1q32.1 /// chr3q20 | 0                                    | ---     | 1.01          | 1.03            | -1.11     | 1.02        | -1.14     | 1.00        | -1.12      | 1.01         | 1.15       | 1.41         | 1.02       | 1.04         |
| TMEM184B | transmembrane protein 184 | chr22q12.2            | 0                                    | ---     | -1.06         | -1.05           | 1.18      | 1.09        | 1.25      | 1.48        | 1.33       | 1.12         | 1.41       | 1.30         | 1.63       | 1.65         |
| TMEM185A | transmembrane protein 185 | chrXq28               | 0                                    | ---     | -1.03         | -1.01           | 1.08      | -1.14       | -1.03     | -1.11       | 1.14       | -1.05        | 1.32       | 1.47         | 1.27       | 1.34         |
| TMEM185B | transmembrane protein 185 | chr2q14.2             | 0                                    | ---     | -1.08         | -1.02           | -1.08     | -1.08       | 1.03      | 1.00        | -1.16      | -1.01        | -1.35      | -1.64        | -1.65      | -1.30        |
| TMEM185B | transmembrane protein 185 | chr2q14.2             | 0                                    | ---     | 1.30          | 1.20            | -1.03     | -1.17       | -1.04     | -1.03       | -1.18      | -1.06        | -1.56      | -1.82        | -1.17      | -1.30        |
| TMEM186  | transmembrane protein 186 | chr16p13.2            | 0                                    | ---     | -1.10         | -1.09           | -1.05     | 1.13        | 1.04      | 1.06        | 1.09       | 1.12         | 1.03       | 1.03         | 1.33       | 1.54         |
| TMEM187  | transmembrane protein 187 | chrXq28               | 0                                    | ---     | -1.06         | -1.06           | 1.14      | 1.06        | 1.34      | 1.12        | 1.10       | 1.09         | 1.60       | 1.26         | 1.22       | 1.52         |
| TMEM19   | transmembrane protein 19  | chr12q21.1            | 0                                    | ---     | 1.06          | 1.02            | 1.08      | -1.04       | 1.09      | -1.01       | -1.48      | -1.20        | -1.79      | -2.04        | 1.14       | -1.12        |
| TMEM19   | transmembrane protein 19  | chr12q21.1            | 0                                    | ---     | 1.15          | 1.12            | 1.12      | 1.06        | 1.00      | 1.10        | -1.50      | -1.10        | -3.05      | -2.68        | -2.33      | -2.91        |
| TMEM19   | transmembrane protein 19  | chr12q21.1            | 0                                    | ---     | 1.34          | 1.38            | 1.04      | 1.08        | 1.03      | -1.00       | -1.41      | -1.03        | -2.06      | -1.95        | -2.14      | -2.60        |
| TMEM194A | transmembrane protein 194 | chr12q13.3            | 0                                    | ---     | -1.04         | -1.09           | 1.24      | 1.24        | 1.15      | 1.05        | 1.19       | -1.03        | -1.38      | 1.06         | 1.43       | 1.46         |
| TMEM194B | transmembrane protein 194 | chr2q32.2             | 0                                    | ---     | -1.26         | -1.11           | 1.15      | 1.05        | 1.13      | 1.02        | 1.25       | 1.28         | -1.03      | -1.22        | -1.35      | -1.43        |
| TMEM196  | transmembrane protein 196 | chr7p21.1             | 0                                    | ---     | -2.63         | -2.08           | -1.69     | -1.49       | -5.13     | -1.40       | -1.20      | 1.17         | 18.72      | 6.84         | -2.96      | 1.28         |
| TMEM198B | transmembrane protein 198 | chr12q13.2            | 0                                    | ---     | -1.05         | 1.00            | 1.07      | 1.14        | 1.08      | 1.18        | 1.04       | 1.21         | -2.20      | -2.37        | -1.72      | -1.48        |
| TMEM200A | transmembrane protein 200 | chr6q23.1             | 0                                    | ---     | 1.94          | 3.54            | 1.01      | 1.25        | 1.16      | 1.90        | 1.52       | -1.07        | 1.35       | 1.23         | -1.30      | 1.45         |
| TMEM200C | transmembrane protein 200 | chr18p11.31           | 0                                    | ---     | 1.04          | 1.11            | -1.08     | -1.16       | 1.14      | 1.12        | -1.13      | -1.10        | -2.09      | -1.85        | -2.39      | -2.55        |
| TMEM201  | transmembrane protein 201 | chr1p36.22            | 0                                    | ---     | 1.04          | -1.04           | 1.04      | 1.17        | -1.08     | -1.18       | 1.29       | 1.21         | -1.48      | -1.89        | -1.64      | -1.91        |
| TMEM201  | transmembrane protein 201 | chr1p36.22            | 0                                    | ---     | -1.08         | -1.02           | 1.08      | 1.04        | 1.07      | 1.13        | -1.02      | -1.10        | -1.20      | -1.42        | -1.02      | -1.14        |
| TMEM205  | transmembrane protein 205 | chr19p13.2            | 0                                    | ---     | 1.00          | -1.15           | 1.05      | 1.02        | 1.13      | 1.01        | -1.07      | -1.10        | 1.53       | 1.39         | 1.53       | 1.60         |
| TMEM206  | transmembrane protein 206 | chr1q32.3             | 0                                    | ---     | 1.11          | 1.01            | -1.03     | 1.05        | 1.06      | 1.07        | 1.04       | 1.00         | 1.34       | 1.22         | 1.27       | 1.10         |
| TMEM213  | transmembrane protein 213 | chr7q34               | 0                                    | ---     | 1.55          | 1.70            | -1.11     | -1.50       | -1.94     | -2.11       | -2.56      | -1.11        | 2.42       | 1.41         | -1.20      | -1.26        |
| TMEM214  | transmembrane protein 214 | chr2p23.3             | apoptotic process                    | ---     | 1.01          | -1.08           | 1.11      | 1.24        | -1.00     | -1.02       | 1.14       | 1.13         | 1.75       | 1.46         | 1.91       | 2.21         |
| TMEM218  | transmembrane protein 218 | chr11q24.2            | 0                                    | ---     | -1.02         | 1.01            | 1.04      | 1.03        | -1.03     | -1.03       | -1.09      | -1.12        | -1.69      | -1.31        | -2.01      | -2.28        |
| TMEM219  | transmembrane protein 219 | chr16p11.2            | apoptotic process                    | ---     | 1.43          | 1.27            | -1.05     | 1.01        | 1.15      | 1.03        | 1.30       | 1.15         | -1.22      | -1.24        | -1.91      | -1.57        |
| TMEM219  | transmembrane protein 219 | chr16p11.2            | apoptotic process                    | ---     | 1.07          | 1.04            | -1.04     | -1.05       | 1.00      | -1.02       | 1.32       | 1.18         | 1.45       | 1.22         | 1.14       | 1.13         |
| TMEM223  | transmembrane protein 223 | chr11q12.3            | blood vessel development             | ---     | -1.02         | -1.07           | -1.04     | -1.16       | -1.03     | -1.20       | -1.01      | 1.01         | -1.37      | -1.29        | -1.34      | -1.29        |
| TMEM234  | transmembrane protein 234 | chr1p36.11-p34.2      | 0                                    | ---     | -1.08         | -1.15           | 1.07      | 1.19        | 1.02      | -1.16       | 1.06       | 1.08         | -1.22      | -1.46        | -1.31      | -1.28        |

| ID        | Gene Title                | Chromosomal Location | 1st Gene Ontology Biological Process     | Pathway | A2497 30 mins | A2497P' 30 mins | A2497 2 h | A2497P' 2 h | A2497 4 h | A2497P' 4 h | A2497 24 h | A2497P' 24 h | A2497 48 h | A2497P' 48 h | A2497 72 h | A2497P' 72 h |
|-----------|---------------------------|----------------------|------------------------------------------|---------|---------------|-----------------|-----------|-------------|-----------|-------------|------------|--------------|------------|--------------|------------|--------------|
| TMEM237   | transmembrane protein 237 | chr2q33.2            | cell projection organization             | ---     | -1.11         | -1.14           | 1.16      | 1.11        | 1.04      | 1.00        | -1.41      | -1.18        | -1.77      | -1.37        | -2.13      | -2.09        |
| TMEM237   | transmembrane protein 237 | chr2q33.2            | cell projection organization             | ---     | 1.08          | 1.11            | 1.00      | -1.02       | -1.07     | -1.06       | -1.00      | -1.03        | -1.53      | -1.23        | -1.44      | -1.52        |
| TMEM241   | transmembrane protein 241 | chr1q11.2            | carbohydrate transport                   | ---     | -1.02         | 1.03            | -1.06     | -1.03       | -1.01     | 1.01        | -1.07      | -1.02        | -1.15      | -1.16        | -1.16      | -1.12        |
| TMEM242   | transmembrane protein 242 | chr6q25.3            | 0                                        | ---     | 1.33          | 1.10            | -1.09     | -1.24       | 1.00      | 1.13        | 1.05       | -1.03        | 1.26       | 1.26         | 1.37       | 1.25         |
| TMEM242   | transmembrane protein 242 | chr6q25.3            | 0                                        | ---     | 1.21          | 1.23            | 1.16      | 1.29        | 1.21      | 1.18        | 1.23       | -1.10        | 1.67       | 1.18         | 1.33       | 1.27         |
| TMEM243   | transmembrane protein 243 | chr7q21.12           | 0                                        | ---     | 1.24          | 1.09            | 1.02      | -1.03       | -1.03     | -1.02       | -1.06      | -1.01        | -1.23      | -1.39        | 1.00       | -1.08        |
| TMEM245   | transmembrane protein 245 | chr9q31              | 0                                        | ---     | 1.01          | 1.06            | 1.05      | -1.10       | 1.06      | 1.01        | 1.13       | -1.10        | 1.20       | 1.24         | 1.79       | 1.69         |
| TMEM246   | transmembrane protein 246 | chr9q31.1            | 0                                        | ---     | 1.03          | 1.02            | 1.12      | 1.12        | 1.05      | 1.07        | -1.07      | -1.12        | -1.23      | -1.24        | -1.21      | -1.28        |
| TMEM246   | transmembrane protein 246 | chr9q31.1            | 0                                        | ---     | -1.02         | -1.14           | -1.03     | 1.05        | 1.06      | 1.01        | -1.26      | -1.26        | -1.46      | -1.15        | -1.41      | -1.40        |
| TMEM248   | transmembrane protein 248 | chr7q11.21           | 0                                        | ---     | 1.19          | 1.34            | 1.00      | -1.19       | 1.02      | 1.06        | 1.19       | 1.06         | 1.44       | 1.16         | 1.45       | 1.06         |
| TMEM248   | transmembrane protein 248 | chr7q11.21           | 0                                        | ---     | 1.07          | 1.14            | 1.11      | 1.13        | 1.11      | 1.05        | 1.15       | -1.04        | -1.26      | -1.21        | -1.44      | -1.26        |
| TMEM255B  | transmembrane protein 255 | chr13q34             | 0                                        | ---     | -1.28         | 1.10            | -1.74     | -1.27       | -4.67     | -1.79       | -1.15      | -1.47        | 3.63       | 2.68         | 3.40       | 3.32         |
| TMEM256   | transmembrane protein 256 | chr17p13.1           | 0                                        | ---     | 1.06          | 1.06            | -1.10     | -1.19       | -1.09     | -1.16       | 1.26       | 1.30         | 1.43       | 1.35         | 1.42       | 1.22         |
| TMEM258   | transmembrane protein 258 | chr11q12.2           | cell adhesion                            | ---     | 1.21          | 1.18            | 1.05      | -1.03       | -1.03     | -1.04       | -1.03      | -1.10        | 1.34       | 1.06         | 1.32       | 1.22         |
| TMEM260   | transmembrane protein 260 | chr14q22.3           | 0                                        | ---     | 1.15          | 1.04            | -1.13     | -1.10       | 1.75      | 1.02        | -1.37      | -1.15        | -2.40      | -1.79        | -1.86      | -2.48        |
| TMEM260   | transmembrane protein 260 | chr14q22.3           | 0                                        | ---     | -1.04         | 1.07            | 1.25      | 1.09        | 1.24      | 1.07        | 1.05       | -1.05        | -1.78      | -1.58        | -2.02      | -1.91        |
| TMEM27    | transmembrane protein 27  | chrXp22              | proteolysis                              | ---     | 1.61          | 1.24            | 1.36      | 1.33        | -1.34     | -1.42       | -1.30      | 1.99         | 1.39       | -1.12        | 1.38       | -1.07        |
| TMEM30A   | transmembrane protein 30A | chr6q14.1            | protein localization to endosome         | ---     | -1.05         | 1.11            | -1.01     | -1.00       | 1.08      | 1.11        | 1.34       | 1.28         | 2.06       | 2.19         | 2.52       | 2.29         |
| TMEM33    | transmembrane protein 33  | chr4p13              | 0                                        | ---     | -1.05         | -1.07           | 1.03      | 1.09        | -1.05     | -1.01       | -1.06      | -1.02        | -1.02      | -1.05        | 1.21       | 1.15         |
| TMEM33    | transmembrane protein 33  | chr4p13              | 0                                        | ---     | 1.17          | 1.13            | 1.10      | -1.02       | -1.13     | -1.05       | -1.28      | -1.04        | 1.38       | 1.34         | 1.55       | 1.33         |
| TMEM37    | transmembrane protein 37  | chr2q14.2            | transport                                | ---     | 1.10          | 1.12            | -1.27     | -1.13       | -1.04     | -1.03       | 1.19       | 1.04         | -2.59      | -1.86        | -3.02      | -2.50        |
| TMEM37    | transmembrane protein 37  | chr2q14.2            | transport                                | ---     | -1.01         | 1.04            | 1.09      | 1.03        | 1.15      | 1.02        | 1.28       | 1.10         | -2.55      | -2.19        | -3.40      | -2.82        |
| TMEM37    | transmembrane protein 37  | chr2q14.2            | transport                                | ---     | -1.43         | -2.09           | -1.67     | -2.06       | 1.11      | -1.05       | -1.44      | -2.48        | -1.62      | -2.01        | -1.46      | -1.27        |
| TMEM38A   | transmembrane protein 38A | chr19p13.11          | transport                                | ---     | 1.07          | -1.03           | 1.01      | -1.00       | 1.09      | -1.08       | -1.01      | 1.04         | 1.14       | 1.02         | 1.34       | 1.55         |
| TMEM38B   | transmembrane protein 38B | chr9q31.2            | transport                                | ---     | -1.07         | -1.19           | 1.06      | -1.17       | 1.05      | -1.01       | 1.25       | 1.04         | 2.35       | 1.55         | 2.48       | 1.77         |
| TMEM39A   | transmembrane protein 39A | chr3q13.33           | 0                                        | ---     | 1.14          | -1.12           | 1.00      | 1.07        | 1.39      | 1.35        | -1.10      | -1.03        | 1.10       | 1.37         | 1.87       | 2.15         |
| TMEM39A   | transmembrane protein 39A | chr3q13.33           | 0                                        | ---     | 1.23          | 1.16            | 1.05      | -1.29       | -1.06     | -1.29       | -1.00      | -1.00        | 1.86       | 1.73         | 2.39       | 2.22         |
| TMEM39A   | transmembrane protein 39A | chr3q13.33           | 0                                        | ---     | -1.33         | -1.36           | -1.20     | -1.45       | -1.11     | -1.19       | -1.28      | -1.03        | 1.01       | 1.10         | 1.38       | 1.56         |
| TMEM41A   | transmembrane protein 41A | chr3q27.2            | 0                                        | ---     | -1.05         | -1.11           | 1.02      | 1.00        | 1.13      | 1.07        | 1.02       | -1.04        | 1.19       | 1.24         | 1.47       | 1.45         |
| TMEM41B   | transmembrane protein 41B | chr1p15.4            | 0                                        | ---     | 1.03          | 1.14            | -1.08     | -1.09       | 1.01      | 1.01        | -1.13      | -1.18        | -1.08      | -1.12        | 1.07       | -1.11        |
| TMEM43    | transmembrane protein 43  | chr3p25.1            | 0                                        | ---     | -1.04         | -1.07           | 1.05      | -1.06       | 1.15      | 1.09        | 1.04       | -1.02        | -1.39      | -1.49        | -1.21      | -1.09        |
| TMEM43    | transmembrane protein 43  | chr3p25.1            | 0                                        | ---     | 1.02          | 1.02            | -1.04     | -1.05       | 1.01      | -1.03       | -1.03      | -1.04        | -1.22      | -1.22        | -1.01      | -1.01        |
| TMEM43    | transmembrane protein 43  | chr3p25.1            | 0                                        | ---     | -1.07         | -1.37           | 1.08      | 1.16        | -1.02     | -1.03       | 1.46       | 1.11         | -2.26      | -3.27        | -1.39      | -1.83        |
| TMEM44    | transmembrane protein 44  | chr3q29              | 0                                        | ---     | 1.03          | -1.10           | 1.02      | 1.41        | -1.06     | -1.22       | 1.20       | 1.09         | 1.45       | 1.24         | 1.06       | 1.56         |
| TMEM44-AS | TMEM44 antisense RNA 1    | chr3q29              | 0                                        | ---     | -1.06         | -1.04           | 1.11      | 1.36        | 1.12      | 1.06        | -1.00      | 1.14         | -2.47      | -2.84        | -2.16      | -1.80        |
| TMEM45A   | transmembrane protein 45A | chr3q12.2            | 0                                        | ---     | 1.06          | 1.12            | 1.05      | 1.06        | -1.07     | 1.16        | 1.03       | -1.06        | 1.16       | 1.25         | 1.37       | 1.35         |
| TMEM45B   | transmembrane protein 45B | chr11q24.3           | 0                                        | ---     | 1.12          | 1.05            | 1.05      | 1.13        | 1.13      | 1.09        | 1.01       | -1.14        | 1.99       | 1.80         | 2.94       | 2.85         |
| TMEM45B   | transmembrane protein 45B | chr11q24.3           | 0                                        | ---     | -1.03         | -1.14           | -1.12     | 1.01        | -1.03     | 1.10        | 1.37       | 1.07         | 2.09       | 2.04         | 2.87       | 2.94         |
| TMEM5     | transmembrane protein 5   | chr12q14.2           | 0                                        | ---     | 1.15          | 1.02            | 1.16      | 1.08        | -1.00     | 1.26        | -1.49      | 1.12         | -2.19      | -1.97        | -2.34      | -2.87        |
| TMEM5     | transmembrane protein 5   | chr12q14.2           | 0                                        | ---     | -1.01         | 1.09            | -1.00     | -1.17       | 1.05      | 1.03        | -1.10      | -1.14        | -1.29      | -1.44        | -1.34      | -1.24        |
| TMEM50A   | transmembrane protein 50A | chr1p36.11           | 0                                        | ---     | 1.01          | 1.04            | -1.02     | -1.02       | -1.00     | -1.00       | -1.20      | -1.20        | -1.51      | -1.43        | -1.40      | -1.71        |
| TMEM50A   | transmembrane protein 50A | chr1p36.11           | 0                                        | ---     | 1.07          | 1.10            | -1.02     | -1.10       | 1.07      | 1.02        | 1.03       | -1.06        | 1.13       | 1.10         | 1.43       | 1.21         |
| TMEM50B   | transmembrane protein 50B | chr21q22.11          | 0                                        | ---     | -1.02         | 1.02            | -1.03     | -1.12       | 1.09      | -1.10       | 1.04       | 1.01         | 1.88       | 1.67         | 2.90       | 2.85         |
| TMEM50B   | transmembrane protein 50B | chr21q22.11          | 0                                        | ---     | 1.04          | 1.04            | 1.07      | -1.10       | 1.05      | 1.08        | -1.13      | -1.27        | -1.36      | -1.19        | -1.12      | -1.22        |
| TMEM50B   | transmembrane protein 50B | chr21q22.11          | 0                                        | ---     | 1.06          | 1.10            | -1.10     | -1.23       | 1.14      | 1.15        | -1.62      | 1.05         | -1.63      | -1.23        | 1.08       | 1.03         |
| TMEM50B   | transmembrane protein 50B | chr21q22.11          | 0                                        | ---     | -1.06         | 1.04            | 1.04      | -1.24       | 1.08      | 1.01        | -1.13      | 1.13         | 1.08       | 1.03         | 2.84       | 2.59         |
| TMEM51    | transmembrane protein 51  | chr1p36.21           | 0                                        | ---     | -1.08         | -1.09           | -1.08     | -1.25       | -1.18     | -1.27       | 1.13       | -1.02        | 1.08       | 1.06         | 1.82       | 1.49         |
| TMEM52    | transmembrane protein 52  | chr1p36.33           | 0                                        | ---     | -1.09         | -1.29           | -1.59     | -1.09       | -1.19     | -1.13       | -1.68      | -1.10        | 3.62       | 2.44         | 2.32       | 2.59         |
| TMEM52B   | transmembrane protein 52B | chr12p13.2           | 0                                        | ---     | 1.21          | 1.17            | 1.19      | 1.20        | -1.06     | 1.09        | -1.11      | 1.12         | 1.49       | 1.47         | 2.26       | 1.38         |
| TMEM53    | transmembrane protein 53  | chr1p34.1            | 0                                        | ---     | -1.37         | 1.07            | -1.09     | -1.04       | -1.36     | -1.27       | 1.44       | 1.27         | 2.35       | 2.38         | 2.24       | 2.28         |
| TMEM53    | transmembrane protein 53  | chr1p34.1            | 0                                        | ---     | 1.10          | 1.12            | 1.36      | 1.69        | -1.27     | -1.01       | 1.09       | -1.01        | 1.96       | 1.63         | 1.86       | 2.01         |
| TMEM54    | transmembrane protein 54  | chr1p35-p34          | 0                                        | ---     | 1.11          | 1.22            | -1.09     | 1.27        | -1.12     | -1.25       | 1.25       | 1.18         | 1.92       | 1.37         | 2.26       | 2.30         |
| TMEM55A   | transmembrane protein 55A | chr8q21.3            | 0                                        | ---     | 1.24          | 1.07            | 1.04      | -1.11       | -1.13     | 1.25        | -1.27      | -1.02        | -2.31      | -1.40        | -1.70      | -2.03        |
| TMEM55B   | transmembrane protein 55B | chr14q11.2           | 0                                        | ---     | -1.09         | -1.07           | -1.01     | -1.04       | -1.08     | -1.23       | 1.02       | 1.00         | 1.06       | -1.04        | 1.81       | 1.98         |
| TMEM56    | transmembrane protein 56  | chr1p21.3            | 0                                        | ---     | 1.06          | 1.01            | 1.12      | 1.15        | -1.04     | 1.11        | -1.39      | -1.15        | -1.61      | -1.27        | -1.38      | -1.38        |
| TMEM56    | transmembrane protein 56  | chr1p21.3            | 0                                        | ---     | 1.05          | 1.05            | 1.10      | -1.07       | -1.02     | 1.00        | 1.18       | 1.16         | -1.26      | -1.06        | -1.50      | -1.26        |
| TMEM57    | transmembrane protein 57  | chr1p36.11 p36.11    | brain development                        | ---     | -1.14         | -1.18           | 1.01      | -1.04       | 1.08      | -1.04       | 1.02       | -1.01        | -1.27      | -1.24        | 1.51       | 1.48         |
| TMEM57    | transmembrane protein 57  | chr1p36.11 p36.11    | brain development                        | ---     | 1.20          | 1.09            | -1.04     | -1.10       | -1.14     | 1.08        | -1.57      | -1.13        | -2.86      | -2.71        | -1.83      | -1.73        |
| TMEM62    | transmembrane protein 62  | chr15q15.2           | 0                                        | ---     | 1.04          | -1.01           | -1.04     | 1.03        | 1.05      | 1.10        | -1.09      | -1.09        | -1.24      | -1.16        | -1.17      | -1.16        |
| TMEM63A   | transmembrane protein 63A | chr14q21.2           | 0                                        | ---     | -1.04         | 1.01            | 1.48      | 1.19        | -1.04     | 1.11        | 1.34       | 1.54         | -2.16      | -1.57        | -1.79      | -1.20        |
| TMEM63A   | transmembrane protein 63A | chr14q21.2           | 0                                        | ---     | 1.20          | -1.04           | -1.01     | 1.03        | -1.17     | -1.42       | 1.19       | 1.25         | -1.03      | -1.16        | -1.36      | -1.39        |
| TMEM63C   | transmembrane protein 63C | chr14q24.3           | 0                                        | ---     | -1.65         | -2.00           | 2.31      | -1.11       | 1.74      | 1.51        | -2.22      | -1.31        | -2.04      | -1.56        | -1.29      | 2.24         |
| TMEM64    | transmembrane protein 64  | chr8q21.3            | 0                                        | ---     | 1.05          | 1.16            | 1.01      | -1.00       | -1.05     | -1.03       | -1.66      | -1.45        | -1.62      | -1.41        | -1.87      | -1.77        |
| TMEM66    | transmembrane protein 66  | chr8p12              | transport                                | ---     | 1.06          | 1.11            | 1.03      | 1.02        | 1.02      | 1.00        | 1.05       | -1.04        | -1.15      | -1.02        | -1.02      | 1.02         |
| TMEM67    | transmembrane protein 67  | chr8q22.1            | negative regulation of centrosome duplic | ---     | 1.25          | 1.05            | 1.04      | 1.02        | -1.08     | -1.11       | 1.20       | -1.16        | -1.82      | -1.84        | -2.72      | -3.97        |
| TMEM67    | transmembrane protein 67  | chr8q22.1            | negative regulation of centrosome duplic | ---     | -1.25         | 1.02            | -1.14     | -1.01       | -1.04     | -1.50       | -1.46      | -1.14        | -2.02      | -2.09        | -2.18      | -1.97        |

| ID         | Gene Title                     | Chromosomal Location    | 1st Gene Ontology Biological Process       | Pathway                                  | A2497 30 mins | A2497P' 30 mins | A2497 2 h | A2497P' 2 h | A2497 4 h | A2497P' 4 h | A2497 24 h | A2497P' 24 h | A2497 48 h | A2497P' 48 h | A2497 72 h | A2497P' 72 h |
|------------|--------------------------------|-------------------------|--------------------------------------------|------------------------------------------|---------------|-----------------|-----------|-------------|-----------|-------------|------------|--------------|------------|--------------|------------|--------------|
| TMEM67     | transmembrane protein 67       | chr8q22.1               | negative regulation of centrosome duplica  | ---                                      | 1.42          | 1.09            | -1.02     | -1.15       | 1.17      | -1.04       | -1.47      | -1.50        | -3.07      | -2.62        | -2.30      | -3.39        |
| TMEM67     | transmembrane protein 67       | chr8q22.1               | negative regulation of centrosome duplica  | ---                                      | 1.32          | 1.31            | 1.41      | 1.32        | -1.07     | -1.11       | -1.21      | -1.16        | -1.71      | -1.03        | -2.33      | -3.07        |
| TMEM67     | transmembrane protein 67       | chr8q22.1               | negative regulation of centrosome duplica  | ---                                      | 1.19          | 1.24            | -1.28     | 1.19        | 1.37      | 1.12        | -1.03      | 1.26         | -1.56      | -1.62        | -2.52      | -1.93        |
| TMEM67     | transmembrane protein 67       | chr8q22.1               | negative regulation of centrosome duplica  | ---                                      | 1.56          | 1.43            | 1.32      | 1.53        | -1.39     | -1.24       | -1.36      | -1.56        | -2.24      | -1.27        | -2.59      | -2.10        |
| TMEM68     | transmembrane protein 68       | chr8q12.1               | metabolic process                          | ---                                      | 1.03          | 1.10            | 1.23      | 1.01        | 1.03      | -1.02       | 1.09       | -1.13        | -1.31      | -1.53        | 1.04       | -1.30        |
| TMEM68     | transmembrane protein 68       | chr8q12.1               | metabolic process                          | ---                                      | 1.14          | 1.20            | 1.28      | -1.02       | 1.00      | 1.18        | -1.01      | -1.06        | 1.10       | 1.24         | 1.56       | 1.16         |
| TMEM70     | transmembrane protein 70       | chr8q21.11              | mitochondrial proton-transporting ATP s    | ---                                      | 1.04          | 1.17            | 1.05      | -1.04       | 1.06      | -1.07       | -1.52      | -1.41        | -1.36      | -1.51        | 1.03       | -1.05        |
| TMEM70     | transmembrane protein 70       | chr8q21.11              | mitochondrial proton-transporting ATP s    | ---                                      | -1.03         | -1.06           | 1.07      | -1.11       | -1.07     | -1.03       | -1.44      | -1.20        | -1.33      | -1.43        | -1.12      | -1.18        |
| TMEM70     | transmembrane protein 70       | chr8q21.11              | mitochondrial proton-transporting ATP s    | ---                                      | 1.07          | -1.01           | 1.04      | -1.24       | -1.02     | -1.06       | -1.07      | 1.20         | -1.45      | -1.98        | -1.50      | -1.65        |
| TMEM71     | transmembrane protein 71       | chr8q24.22              | 0                                          | ---                                      | -1.27         | 3.70            | -1.59     | -9.54       | 1.04      | -1.34       | -1.86      | 1.14         | 6.70       | 3.23         | 12.31      | 5.82         |
| TMEM74B    | transmembrane protein 74B      | chr20p13                | 0                                          | ---                                      | 1.06          | -1.20           | -4.43     | -6.74       | -1.74     | 2.52        | -1.37      | -1.89        | 1.98       | 3.58         | 5.37       | 8.53         |
| TMEM79     | transmembrane protein 79       | chr1q22                 | 0                                          | ---                                      | -1.20         | -1.29           | -1.26     | 1.29        | -1.05     | -1.07       | 1.36       | 1.30         | 1.09       | 1.11         | 1.59       | 1.84         |
| TMEM80     | transmembrane protein 80       | chr11p15.5              | 0                                          | ---                                      | -1.09         | -1.14           | 1.04      | 1.01        | 1.14      | 1.07        | -1.35      | -1.10        | -1.27      | -1.31        | -1.85      | -1.53        |
| TMEM86A    | transmembrane protein 86A      | chr11p15.1              | 0                                          | ---                                      | 1.24          | -1.05           | -1.05     | -1.46       | 1.05      | -1.43       | -2.42      | -3.24        | -3.17      | -6.56        | -1.98      | -4.86        |
| TMEM86B    | transmembrane protein 86B      | chr19q13.42             | ether lipid metabolic process              | ---                                      | 1.09          | -1.42           | 1.12      | -1.08       | 1.01      | 1.13        | -1.00      | 1.15         | 1.42       | 1.16         | 1.22       | 1.41         |
| TMEM87A    | transmembrane protein 87A      | chr15q15.1              | 0                                          | ---                                      | 1.01          | -1.13           | 1.35      | 1.22        | -1.10     | 1.21        | -1.72      | -1.20        | -2.10      | -2.20        | -2.93      | -3.57        |
| TMEM87A    | transmembrane protein 87A      | chr15q15.1              | 0                                          | ---                                      | -1.06         | -1.03           | -1.04     | -1.08       | 1.19      | 1.04        | 1.04       | -1.07        | 1.14       | 1.03         | 1.55       | 1.44         |
| TMEM87A    | transmembrane protein 87A      | chr15q15.1              | 0                                          | ---                                      | -1.01         | -1.02           | 1.03      | -1.01       | 1.05      | 1.03        | 1.04       | -1.00        | -1.01      | -1.01        | 1.21       | 1.19         |
| TMEM87B    | transmembrane protein 87B      | chr2q13                 | 0                                          | ---                                      | 1.23          | 1.23            | 1.34      | -1.07       | -1.03     | 1.24        | -1.33      | -1.26        | -1.22      | -1.26        | -1.39      | 1.04         |
| TMEM8A     | transmembrane protein 8A       | chr16p13.3              | translation                                | ---                                      | -1.12         | -1.21           | -1.02     | 1.17        | 1.23      | 1.06        | 1.22       | 1.03         | 2.14       | 1.80         | 1.38       | 1.63         |
| TMEM8A     | transmembrane protein 8A       | chr16p13.3              | translation                                | ---                                      | 1.22          | 1.11            | 1.10      | -1.03       | 1.04      | 1.06        | 1.35       | 1.23         | 1.71       | 1.61         | 1.20       | 1.35         |
| TMEM9      | transmembrane protein 9        | ---                     | transport                                  | ---                                      | -1.15         | -1.21           | -1.01     | 1.04        | 1.05      | 1.11        | 1.12       | 1.09         | 1.10       | 1.22         | 1.07       | 1.22         |
| TMEM9      | transmembrane protein 9        | ---                     | transport                                  | ---                                      | -1.05         | -1.15           | 1.03      | 1.10        | 1.11      | -1.05       | 1.14       | 1.03         | 1.30       | 1.28         | 1.29       | 1.47         |
| TMEM91     | transmembrane protein 91       | chr19q13.2              | response to biotic stimulus                | ---                                      | -1.03         | 1.09            | 1.22      | 1.09        | 1.05      | 1.44        | 1.79       | 1.73         | 2.08       | 2.69         | 3.32       | 4.28         |
| TMEM92     | transmembrane protein 92       | chr17q21.33             | 0                                          | ---                                      | -1.56         | -1.50           | 1.47      | 1.39        | -1.11     | 1.48        | 2.34       | -1.14        | 2.38       | 1.79         | 2.71       | 3.22         |
| TMEM92     | transmembrane protein 92       | chr17q21.33             | 0                                          | ---                                      | -1.06         | -1.27           | 1.03      | 1.11        | 1.01      | 1.09        | 1.45       | 1.44         | 3.75       | 2.74         | 3.12       | 3.32         |
| TMEM97     | transmembrane protein 97       | chr17q11.2              | regulation of cell growth                  | ---                                      | -1.02         | 1.02            | 1.02      | 1.01        | 1.04      | 1.01        | 1.15       | 1.03         | 1.11       | -1.03        | 1.26       | 1.14         |
| TMEM97     | transmembrane protein 97       | chr17q11.2              | regulation of cell growth                  | ---                                      | 1.01          | 1.07            | -1.11     | -1.07       | -1.06     | -1.01       | -1.11      | -1.06        | -1.24      | -1.12        | 1.13       | 1.08         |
| TMEM97     | transmembrane protein 97       | chr17q11.2              | regulation of cell growth                  | ---                                      | -1.04         | 1.01            | 1.03      | -1.03       | 1.06      | -1.03       | 1.16       | 1.09         | -1.06      | -1.10        | 1.45       | 1.48         |
| TMEM9B     | TMEM9 domain family, mem       | chr11p15.3              | signal transduction                        | ---                                      | -1.05         | 1.17            | 1.02      | -1.06       | 1.10      | 1.06        | 1.11       | -1.21        | 1.38       | -1.01        | 1.81       | 1.20         |
| TMF1       | TATA element modulatory        | chr3p21-p12             | acrosome assembly                          | ---                                      | 1.28          | 1.25            | 1.18      | -1.03       | 1.21      | 1.35        | 1.23       | 1.26         | -1.47      | 1.16         | 1.05       | 1.12         |
| TMF1       | TATA element modulatory        | chr3p21-p12             | acrosome assembly                          | ---                                      | 1.12          | -1.03           | -1.08     | -1.10       | -1.16     | -1.07       | -1.07      | 1.13         | -1.07      | 1.01         | 1.54       | 1.42         |
| TMF1       | TATA element modulatory        | chr3p21-p12             | acrosome assembly                          | ---                                      | 1.05          | 1.04            | 1.12      | 1.04        | 1.21      | 1.02        | -1.06      | -1.19        | -1.13      | -1.12        | -1.23      | -1.19        |
| TMF1       | TATA element modulatory        | chr3p21-p12             | acrosome assembly                          | ---                                      | 1.23          | 1.26            | -1.04     | -1.00       | -1.20     | 1.16        | -1.44      | -1.08        | 1.01       | 1.13         | 1.00       | 1.05         |
| TMLHE      | trimethyllysine hydroxylase    | chrXq28                 | cellular nitrogen compound metabolic pr    | ---                                      | -1.09         | -1.13           | -1.01     | -1.03       | 1.13      | -1.02       | -1.05      | 1.04         | -1.27      | 1.00         | -1.78      | -1.48        |
| TMLHE      | trimethyllysine hydroxylase    | chrXq28                 | cellular nitrogen compound metabolic pr    | ---                                      | -1.03         | 1.11            | -1.23     | 1.03        | -1.30     | -1.13       | -1.03      | -1.34        | -1.58      | -1.10        | -2.02      | -2.04        |
| TMLHE-AS1  | TMEL antisense RNA 1           | ---                     | 0                                          | ---                                      | 1.21          | 1.06            | 1.27      | 1.66        | -1.17     | -1.20       | -1.65      | -1.91        | -2.61      | -1.85        | -3.53      | -5.12        |
| TMOD1      | tropomodulin 1                 | chr9q22.3               | muscle contraction                         | Striated_muscle_contraction // GenMAPP   | -1.09         | -1.05           | 1.03      | 1.04        | 1.02      | -1.04       | -1.10      | -1.06        | -1.63      | -1.43        | -1.41      | -1.14        |
| TMOD1      | tropomodulin 1                 | chr9q22.3               | muscle contraction                         | Striated_muscle_contraction // GenMAPP   | 1.15          | -1.16           | -1.01     | -1.08       | -1.01     | 1.00        | 1.04       | -1.02        | -1.99      | -1.41        | -1.46      | -1.15        |
| TMOD1 // T | tropomodulin 1 /// thiosulfate | chr9q22.3 /// chr9q22.3 | muscle contraction                         | Striated_muscle_contraction // GenMAPP   | -1.04         | 1.06            | 1.24      | 1.05        | -1.06     | -1.05       | 1.10       | 1.02         | -1.41      | -1.40        | -1.03      | 1.05         |
| TMOD2      | tropomodulin 2 (neuronal)      | chr15q21.2              | neuron-neuron synaptic transmission        | ---                                      | 1.89          | 1.26            | 1.18      | -1.05       | 1.19      | 1.07        | -1.33      | 1.25         | -3.69      | -2.52        | -8.77      | -3.93        |
| TMOD3      | tropomodulin 3 (ubiquitous)    | chr15q21.1-q21.2        | 0                                          | ---                                      | -1.09         | -1.04           | -1.03     | -1.22       | -1.12     | 1.04        | -1.09      | 1.01         | 1.21       | 1.32         | 1.28       | -1.16        |
| TMOD3      | tropomodulin 3 (ubiquitous)    | chr15q21.1-q21.2        | 0                                          | ---                                      | 1.16          | 1.13            | 1.17      | -1.06       | -1.04     | -1.08       | 1.20       | 1.15         | 1.40       | 1.08         | 1.80       | 1.21         |
| TMPO       | thymopoietin                   | chr12q22                | regulation of transcription, DNA-depend    | ---                                      | 1.08          | 1.11            | 1.02      | 1.03        | -1.13     | -1.18       | -1.09      | -1.09        | 1.19       | 1.15         | 1.12       | 1.30         |
| TMPO       | thymopoietin                   | chr12q22                | regulation of transcription, DNA-depend    | ---                                      | 1.04          | 1.18            | 1.06      | -1.05       | 1.13      | 1.05        | -1.14      | -1.02        | -1.06      | -1.06        | -1.28      | -1.41        |
| TMPO       | thymopoietin                   | chr12q22                | regulation of transcription, DNA-depend    | ---                                      | 1.01          | 1.04            | -1.04     | -1.07       | -1.01     | 1.04        | -1.44      | -1.14        | -1.26      | -1.13        | -1.38      | -1.57        |
| TMPO       | thymopoietin                   | chr12q22                | regulation of transcription, DNA-depend    | ---                                      | -1.38         | 1.42            | -1.10     | 1.03        | -1.00     | 1.11        | 1.42       | 3.45         | 2.79       | 1.47         | 1.72       | 1.70         |
| TMPRSS15   | transmembrane protease, se     | chr21q21.1              | proteolysis                                | ---                                      | 2.04          | 2.03            | -1.55     | -1.76       | 2.41      | -1.95       | 1.59       | 1.85         | 4.29       | 4.52         | 1.70       | 2.14         |
| TMPRSS3    | transmembrane protease, se     | chr21q22.3              | proteolysis                                | ---                                      | -1.01         | -1.09           | -1.13     | -1.05       | -1.05     | -1.08       | 1.28       | 1.06         | 2.63       | 2.72         | 3.05       | 3.38         |
| TMPRSS3    | transmembrane protease, se     | chr21q22.3              | proteolysis                                | ---                                      | 1.01          | -1.00           | 1.04      | 1.08        | -1.04     | 1.03        | 1.25       | 1.07         | 2.27       | 2.11         | 2.21       | 2.31         |
| TMPRSS3    | transmembrane protease, se     | chr21q22.3              | proteolysis                                | ---                                      | -1.10         | -1.03           | 1.12      | 1.05        | 1.07      | 1.02        | 1.19       | 1.11         | 1.73       | 1.40         | 1.66       | 1.65         |
| TMTC1      | transmembrane and tetra        | chr12p11.22             | RNA processing                             | ---                                      | 1.03          | 1.15            | 1.02      | -1.01       | 1.01      | 1.07        | 1.08       | -1.03        | 1.48       | 1.34         | 1.30       | 1.09         |
| TMTC1      | transmembrane and tetra        | chr12p11.22             | RNA processing                             | ---                                      | 1.17          | -1.09           | -1.05     | -1.10       | 1.14      | 1.01        | 1.32       | 1.18         | 1.46       | 1.62         | 1.47       | 1.17         |
| TMTC3      | transmembrane and tetra        | chr12q21.32             | post-embryonic development                 | ---                                      | 1.20          | 1.11            | 1.18      | 1.09        | -1.19     | -1.05       | -1.21      | -1.18        | -1.44      | -1.36        | -1.63      | -1.88        |
| TMTC3      | transmembrane and tetra        | chr12q21.32             | post-embryonic development                 | ---                                      | -1.09         | -1.17           | 1.12      | 1.12        | 1.06      | 1.15        | -1.28      | -1.09        | -1.36      | -1.15        | -1.29      | -1.23        |
| TMTC4      | transmembrane and tetra        | chr13q32.3              | 0                                          | ---                                      | 1.04          | 1.02            | 1.01      | 1.16        | -1.03     | -1.07       | 1.18       | 1.06         | 1.40       | 1.31         | 1.11       | 1.19         |
| TMTC4      | transmembrane and tetra        | chr13q32.3              | 0                                          | ---                                      | 1.01          | 1.04            | -1.06     | -1.29       | -1.11     | -1.00       | -1.36      | -1.03        | -1.95      | -1.43        | -2.02      | -1.93        |
| TNUB2      | transmembrane and ubiqui       | chr17q21.31             | 0                                          | ---                                      | -1.10         | -1.05           | -1.03     | 1.02        | -1.06     | -1.05       | 1.01       | 1.09         | -1.03      | -1.00        | 1.16       | 1.30         |
| TMX1       | thioredoxin-related transme    | chr14q22.1              | DNA replication                            | ---                                      | -1.05         | -1.04           | 1.04      | -1.16       | 1.10      | 1.07        | 1.21       | 1.17         | 1.21       | 1.16         | 1.44       | 1.53         |
| TMX1       | thioredoxin-related transme    | chr14q22.1              | DNA replication                            | ---                                      | 1.11          | 1.08            | -1.10     | 1.03        | -1.17     | 1.18        | -1.40      | -1.16        | -1.48      | -1.01        | -1.25      | -1.29        |
| TMX3       | thioredoxin-related transme    | chr18q22                | protein folding                            | ---                                      | 1.45          | 1.96            | -1.17     | 1.06        | -1.09     | 1.28        | -1.44      | -1.40        | 3.34       | 2.38         | 4.01       | 2.65         |
| TMX4       | thioredoxin-related transme    | chr20p12                | electron transport chain                   | ---                                      | -1.06         | -1.11           | -1.04     | -1.02       | 1.07      | -1.13       | 1.01       | 1.01         | -1.19      | -1.17        | -1.30      | -1.30        |
| TMX4       | thioredoxin-related transme    | chr20p12                | electron transport chain                   | ---                                      | -1.06         | -1.05           | 1.04      | 1.10        | -1.07     | 1.04        | -1.10      | 1.02         | -1.75      | -1.36        | -2.22      | -2.14        |
| TNC        | tenascin C                     | chr9q33                 | cell adhesion                              | ---                                      | 2.02          | 1.77            | 1.70      | 1.23        | -1.03     | -1.06       | -1.74      | 1.23         | 1.02       | 1.16         | -1.07      | 1.66         |
| TNC        | tenascin C                     | chr9q33                 | cell adhesion                              | ---                                      | -2.55         | -2.59           | -1.54     | 1.51        | 3.80      | 5.17        | -3.96      | 1.60         | 1.69       | 2.13         | 3.83       | 1.26         |
| TNF        | tumor necrosis factor          | chr6p21.3               | protein import into nucleus, translocation | Apoptosis // GenMAPP /// Apoptosis, GenM | -2.19         | 2.28            | -1.10     | -1.40       | -2.19     | 1.07        | 1.01       | 2.67         | 4.39       | 3.94         | 2.15       | 4.15         |

| ID        | Gene Title                     | Chromosomal Location | 1st Gene Ontology Biological Process       | Pathway                                 | A2497 30 mins | A2497P' 30 mins | A2497 2 h | A2497P' 2 h | A2497 4 h | A2497P' 4 h | A2497 24 h | A2497P' 24 h | A2497 48 h | A2497P' 48 h | A2497 72 h | A2497P' 72 h |
|-----------|--------------------------------|----------------------|--------------------------------------------|-----------------------------------------|---------------|-----------------|-----------|-------------|-----------|-------------|------------|--------------|------------|--------------|------------|--------------|
| TNFAIP1   | tumor necrosis factor, alpha   | chr17q22-q23         | DNA replication                            | Glycolysis_and_Gluconeogenesis // GenMA | 1.09          | -1.06           | -1.01     | 1.12        | 1.03      | 1.01        | -1.05      | 1.01         | 1.07       | 1.10         | 1.25       | 1.31         |
| TNFAIP1   | tumor necrosis factor, alpha   | chr17q22-q23         | DNA replication                            | Glycolysis_and_Gluconeogenesis // GenMA | -1.27         | -1.14           | -1.05     | -1.15       | 1.08      | -1.02       | -1.06      | 1.01         | 1.42       | 1.16         | 1.30       | 1.30         |
| TNFAIP2   | tumor necrosis factor, alpha   | chr14q32             | angiogenesis                               | ---                                     | 1.07          | 1.10            | -1.03     | -1.01       | 1.00      | 1.02        | 1.00       | 1.04         | 1.71       | 1.43         | 1.35       | 1.23         |
| TNFAIP2   | tumor necrosis factor, alpha   | chr14q32             | angiogenesis                               | ---                                     | -1.60         | -1.54           | -1.63     | -1.46       | 1.29      | -1.24       | 1.63       | 3.80         | 2.06       | 1.57         | 1.57       | 1.48         |
| TNFAIP3   | tumor necrosis factor, alpha   | chr6q23              | B-1 B cell homeostasis                     | ---                                     | -1.08         | 1.03            | 1.01      | 1.05        | -1.01     | 1.14        | 2.47       | 1.72         | 10.52      | 5.90         | 15.47      | 5.99         |
| TNFAIP3   | tumor necrosis factor, alpha   | chr6q23              | B-1 B cell homeostasis                     | ---                                     | 1.05          | 1.32            | -1.14     | -1.08       | 1.08      | -1.01       | 1.83       | 1.66         | 4.52       | 3.60         | 9.31       | 4.07         |
| TNFAIP6   | tumor necrosis factor, alpha   | chr2q23.3            | inflammatory response                      | ---                                     | 2.92          | 2.01            | -2.58     | -1.65       | -1.10     | 3.29        | 2.54       | 2.76         | 26.63      | 12.13        | 49.08      | 29.56        |
| TNFAIP6   | tumor necrosis factor, alpha   | chr2q23.3            | inflammatory response                      | ---                                     | -1.17         | 1.99            | -1.49     | -1.26       | 1.32      | 1.99        | 1.58       | -3.80        | 23.98      | 26.44        | 22.34      | 11.57        |
| TNFAIP8   | tumor necrosis factor, alpha   | chr5q23.1            | apoptotic process                          | ---                                     | 1.13          | 1.11            | 1.02      | -1.05       | -1.11     | -1.15       | 1.21       | 1.05         | 1.33       | 1.38         | 1.31       | 1.24         |
| TNFAIP8   | tumor necrosis factor, alpha   | chr5q23.1            | apoptotic process                          | ---                                     | 1.13          | 1.15            | -1.03     | -1.04       | -1.02     | 1.10        | 1.25       | 1.11         | 1.07       | 1.25         | 1.29       | 1.18         |
| TNFAIP8L1 | tumor necrosis factor, alpha   | chr19p13.3           | 0                                          | ---                                     | -1.15         | -1.21           | 1.10      | 1.06        | 1.07      | -1.09       | -1.16      | 1.53         | 1.51       | 1.43         | 1.38       | ---          |
| TNFRSF10A | tumor necrosis factor receptor | chr8p21              | apoptotic process                          | ---                                     | -1.02         | -1.07           | 1.07      | -1.02       | -1.08     | -1.05       | 1.13       | 1.08         | 1.63       | 1.63         | 2.13       | 2.23         |
| TNFRSF10A | tumor necrosis factor receptor | chr8p21              | apoptotic process                          | ---                                     | -1.37         | -1.52           | 1.07      | 1.24        | -1.12     | -1.15       | -1.08      | 1.06         | -1.01      | 1.05         | 1.70       | 1.57         |
| TNFRSF10A | tumor necrosis factor receptor | chr8p21              | apoptotic process                          | ---                                     | 1.08          | 1.05            | 1.06      | -1.01       | 1.05      | 1.09        | 1.12       | 1.03         | 1.43       | 1.23         | 1.79       | 1.81         |
| TNFRSF10B | tumor necrosis factor receptor | chr8p22-p21          | apoptotic process                          | Apoptosis // GenMAPP                    | -1.06         | 1.06            | 1.05      | -1.01       | -1.06     | -1.08       | 1.02       | 1.01         | 1.54       | 1.22         | 1.28       | 1.25         |
| TNFRSF10B | tumor necrosis factor receptor | chr8p22-p21          | apoptotic process                          | Apoptosis // GenMAPP                    | -1.05         | -1.14           | 1.07      | 1.04        | 1.06      | -1.05       | 1.37       | 1.34         | 2.39       | 1.91         | 1.69       | 1.83         |
| TNFRSF10B | tumor necrosis factor receptor | chr8p22-p21          | apoptotic process                          | Apoptosis // GenMAPP                    | -1.04         | -1.15           | 1.02      | 1.13        | 1.04      | -1.02       | 1.29       | 1.32         | 2.23       | 1.77         | 1.84       | 1.75         |
| TNFRSF10D | tumor necrosis factor receptor | chr8p21              | apoptotic process                          | ---                                     | -1.02         | -1.03           | -1.08     | 1.06        | 1.07      | 1.01        | -1.14      | -1.02        | 2.43       | 2.19         | 2.32       | 2.67         |
| TNFRSF11A | tumor necrosis factor receptor | chr18q22.1           | ossification                               | ---                                     | -1.01         | -1.23           | 1.27      | 1.15        | -1.05     | 1.04        | -1.25      | -1.01        | 1.02       | 1.57         | -1.44      | -1.06        |
| TNFRSF11A | tumor necrosis factor receptor | chr18q22.1           | ossification                               | ---                                     | -1.11         | -1.32           | 1.04      | -1.18       | 1.03      | 1.16        | 1.18       | 1.08         | 2.40       | 3.21         | 1.23       | 1.51         |
| TNFRSF11B | tumor necrosis factor receptor | chr8q24              | skeletal system development                | ---                                     | -1.03         | 1.04            | 1.02      | -1.22       | 1.01      | -1.03       | -1.11      | -1.09        | -2.53      | -2.93        | -1.85      | -2.68        |
| TNFRSF11B | tumor necrosis factor receptor | chr8q24              | skeletal system development                | ---                                     | 1.30          | 1.17            | 1.15      | 1.63        | -1.17     | -1.04       | -1.20      | 1.43         | -1.64      | -2.05        | -2.09      | -2.52        |
| TNFRSF12A | tumor necrosis factor receptor | chr1p13.3            | angiogenesis                               | ---                                     | 1.06          | 1.09            | 1.00      | -1.12       | 1.01      | 1.09        | 1.42       | 1.25         | 3.22       | 2.23         | 3.67       | 2.77         |
| TNFRSF19  | tumor necrosis factor receptor | chr13q12.11-q12.3    | hair follicle development                  | ---                                     | -1.35         | -1.19           | 1.08      | -1.16       | -1.19     | -1.06       | -2.43      | 1.07         | -3.27      | -1.99        | -2.29      | -2.15        |
| TNFRSF1A  | tumor necrosis factor receptor | chr12p13.2           | response to hypoxia                        | Apoptosis // GenMAPP /// Apoptosis_GenM | -1.04         | -1.05           | 1.08      | 1.01        | -1.01     | -1.03       | 1.10       | 1.13         | 1.43       | 1.40         | 1.20       | 1.20         |
| TNFRSF1B  | tumor necrosis factor receptor | chr1p36.22           | apoptotic process                          | Apoptosis // GenMAPP /// Apoptosis_GenM | 1.06          | 1.03            | 2.35      | 3.69        | 2.24      | -1.28       | -1.42      | -1.10        | 3.13       | 2.91         | 2.25       | 2.02         |
| TNFRSF21  | tumor necrosis factor receptor | chr6p21.1            | apoptotic process                          | Apoptosis // GenMAPP                    | 1.57          | 1.37            | 1.05      | -1.05       | -1.07     | 1.25        | -1.07      | -1.44        | 1.31       | 1.54         | 1.58       | 1.42         |
| TNFRSF21  | tumor necrosis factor receptor | chr6p21.1            | apoptotic process                          | Apoptosis // GenMAPP                    | -1.10         | -1.19           | 1.12      | 1.04        | 1.19      | 1.11        | 1.29       | 1.15         | 1.73       | 1.66         | 1.88       | 1.81         |
| TNFRSF4   | tumor necrosis factor receptor | chr1p36              | inflammatory response                      | ---                                     | -1.01         | -1.02           | 1.09      | 1.20        | 1.09      | -1.08       | -1.04      | -1.01        | -1.01      | 1.07         | 1.21       | 1.08         |
| TNFRSF9   | tumor necrosis factor receptor | chr1p36              | apoptotic process                          | ---                                     | 1.51          | -2.38           | 2.35      | -1.14       | -1.37     | -1.71       | 1.47       | 1.72         | 2.82       | 2.95         | 5.41       | ---          |
| TNFRSF9   | tumor necrosis factor receptor | chr1p36              | apoptotic process                          | ---                                     | -1.25         | -1.86           | -1.97     | -1.27       | 2.51      | 2.71        | 2.24       | 1.35         | 1.27       | -1.10        | 1.13       | 1.19         |
| TNFRSF9   | tumor necrosis factor receptor | chr1p36              | apoptotic process                          | ---                                     | 3.99          | 2.11            | 1.11      | 1.03        | -1.23     | 1.13        | -1.74      | 1.90         | 1.16       | 2.21         | 2.65       | 1.91         |
| TNFSF10   | tumor necrosis factor (ligand) | chr3q26              | apoptotic process                          | Apoptosis // GenMAPP /// Apoptosis_GenM | -1.12         | -1.13           | 1.08      | 1.12        | -1.05     | -1.15       | 1.02       | -1.02        | -3.04      | -3.41        | -3.04      | -2.68        |
| TNFSF10   | tumor necrosis factor (ligand) | chr3q26              | apoptotic process                          | Apoptosis // GenMAPP /// Apoptosis_GenM | -1.10         | -1.07           | 1.11      | 1.26        | 1.00      | 1.05        | -1.02      | 1.26         | -3.28      | -3.26        | -2.85      | -2.70        |
| TNFSF10   | tumor necrosis factor (ligand) | chr3q26              | apoptotic process                          | Apoptosis // GenMAPP /// Apoptosis_GenM | 1.08          | 1.04            | -1.10     | -1.06       | -1.15     | -1.04       | 1.02       | 1.05         | -2.54      | -2.65        | -2.31      | -2.24        |
| TNFSF13B  | tumor necrosis factor (ligand) | chr13q32-q34         | B cell homeostasis                         | ---                                     | 2.03          | 1.64            | -1.49     | -1.64       | -1.89     | -1.49       | 1.84       | 1.01         | 1.20       | -1.22        | 2.04       | 3.02         |
| TNFSF13B  | tumor necrosis factor (ligand) | chr13q32-q34         | B cell homeostasis                         | ---                                     | 1.05          | 1.25            | -1.48     | -1.24       | -1.27     | -1.65       | 1.29       | 1.17         | 2.36       | 2.24         | 3.64       | 4.04         |
| TNFSF15   | tumor necrosis factor (ligand) | chr9q32              | apoptotic process                          | ---                                     | -1.16         | 1.23            | -1.03     | 1.02        | -1.61     | -1.15       | 1.62       | 1.50         | 1.11       | -2.02        | -2.84      | -3.20        |
| TNFSF4    | tumor necrosis factor (ligand) | chr1q25              | cytokine production                        | ---                                     | 1.40          | 1.33            | -1.31     | -1.32       | -1.36     | 1.03        | -1.22      | 1.04         | -3.82      | -2.91        | -2.26      | -2.37        |
| TNFSF8    | tumor necrosis factor (ligand) | chr9q33              | apoptotic process                          | ---                                     | -1.15         | -1.50           | -1.38     | 1.03        | 1.57      | 1.43        | -1.80      | -1.08        | 2.19       | 2.90         | -1.05      | -1.40        |
| TNFSF9    | tumor necrosis factor (ligand) | chr9p13.3            | apoptotic process                          | ---                                     | 1.39          | 1.19            | 1.24      | 1.20        | 1.18      | 1.07        | 1.15       | -1.01        | -1.01      | -1.00        | 2.00       | 1.61         |
| TNIK      | TRAF2 and NCK interacting      | chr3q26.31           | protein phosphorylation                    | ---                                     | 1.28          | -1.33           | 2.33      | 1.52        | 1.93      | 1.11        | 2.06       | 1.09         | 2.24       | 2.25         | 1.20       | 2.10         |
| TNIK      | TRAF2 and NCK interacting      | chr3q26.31           | protein phosphorylation                    | ---                                     | 1.29          | 1.49            | 1.20      | 1.36        | -1.10     | 1.23        | -1.25      | 1.15         | 2.46       | 4.50         | 1.35       | 1.58         |
| TNIK      | TRAF2 and NCK interacting      | chr3q26.31           | protein phosphorylation                    | ---                                     | 1.29          | 1.26            | -1.14     | -1.30       | -1.03     | -1.07       | 1.06       | 1.04         | 1.47       | 1.83         | 1.72       | 1.79         |
| TNIP1     | TNFAIP3 interacting protein    | chr5q32-q33.1        | MyD88-dependent toll-like receptor sign    | ---                                     | 1.28          | 1.16            | 1.24      | -2.36       | 5.19      | 4.08        | 1.80       | 1.43         | 3.69       | 2.43         | 2.44       | 1.69         |
| TNIP1     | TNFAIP3 interacting protein    | chr5q32-q33.1        | MyD88-dependent toll-like receptor sign    | ---                                     | -1.02         | -1.06           | -1.02     | 1.07        | 1.01      | -1.04       | 1.38       | 1.27         | 1.99       | 1.53         | 1.80       | 1.73         |
| TNIP2     | TNFAIP3 interacting protein    | chr4p16.3            | transcription, DNA-dependent               | ---                                     | 1.05          | 1.09            | -1.01     | 1.00        | 1.01      | -1.12       | 1.27       | 1.08         | 1.91       | 1.42         | 1.64       | 1.72         |
| TNIP2     | TNFAIP3 interacting protein    | chr4p16.3            | transcription, DNA-dependent               | ---                                     | 1.14          | 1.15            | 1.08      | 1.06        | 1.09      | -1.08       | 1.07       | 1.07         | 1.95       | 1.26         | 1.66       | 1.70         |
| TNIP2     | TNFAIP3 interacting protein    | chr4p16.3            | transcription, DNA-dependent               | ---                                     | 1.37          | 1.18            | 1.13      | 1.06        | 1.11      | -1.04       | 1.18       | 1.00         | 1.74       | 1.11         | 1.81       | 1.94         |
| TNIP3     | TNFAIP3 interacting protein    | chr4q27              | MyD88-independent toll-like receptor sig   | ---                                     | 6.44          | 4.01            | -1.39     | -1.39       | 3.14      | 3.71        | -1.04      | 4.93         | 2.69       | 2.74         | -2.62      | -5.39        |
| TNK1      | tyrosine kinase, non-receptor  | chr17p13.1           | protein phosphorylation                    | ---                                     | -1.27         | -1.09           | 1.36      | 1.27        | 1.03      | -1.27       | 1.16       | 1.02         | -1.37      | -1.66        | -1.41      | -1.24        |
| TNK2      | tyrosine kinase, non-receptor  | chr3q29              | protein phosphorylation                    | ---                                     | 1.63          | 1.64            | 3.35      | 4.84        | 3.38      | 1.02        | -4.84      | 1.49         | -1.46      | -2.06        | -3.60      | ---          |
| TNKS      | tankyrase, TRF1-interacting    | chr8p23.1            | protein polyubiquitination                 | ---                                     | -1.50         | 1.07            | -1.75     | -1.80       | -2.11     | -1.80       | 5.53       | 1.44         | -1.52      | 1.35         | 5.15       | 7.31         |
| TNKS2     | tankyrase, TRF1-interacting    | chr10q23.3           | protein polyubiquitination                 | ---                                     | 1.25          | 1.96            | 1.70      | 2.28        | 2.20      | 2.01        | 1.07       | -1.96        | -1.12      | -1.25        | 1.49       | 5.32         |
| TNN3      | tropoin I type 3 (cardiac)     | chr19q13.4           | vasculogenesis                             | Striated_muscle_contraction // GenMAPP  | 1.23          | -1.14           | 2.77      | 4.24        | 1.20      | -1.97       | -1.22      | -1.87        | 2.56       | 3.29         | 4.70       | 5.27         |
| TNNI3K    | TNNI3 interacting kinase       | chr1p31.1            | protein phosphorylation                    | ---                                     | 1.66          | 1.25            | 1.58      | 2.47        | -1.01     | 1.03        | -1.16      | 1.24         | -2.92      | 1.00         | -2.58      | -2.46        |
| TNNT1     | tropoin T type 1 (skeletal)    | chr19q13.4           | skeletal muscle contraction                | Striated_muscle_contraction // GenMAPP  | -1.20         | -1.11           | 1.09      | 1.25        | -1.05     | -1.01       | 1.11       | 1.13         | 1.94       | 1.67         | 1.77       | 2.50         |
| TNPO1     | transportin 1                  | chr5q13.2            | protein import into nucleus, translocation | ---                                     | 1.14          | 1.19            | 1.08      | -1.01       | 1.15      | 1.12        | -1.04      | -1.12        | 1.03       | 1.09         | 1.03       | -1.41        |
| TNPO1     | transportin 1                  | chr5q13.2            | protein import into nucleus, translocation | ---                                     | -1.01         | -1.01           | -1.03     | 1.02        | -1.08     | 1.02        | 1.00       | 1.06         | 1.14       | 1.11         | 1.07       | ---          |
| TNPO2     | transportin 2                  | chr19p13.2           | transport                                  | ---                                     | -1.22         | 1.00            | 1.15      | 1.16        | 1.28      | 1.17        | -1.05      | -1.05        | 1.05       | 1.13         | 1.47       | 1.46         |
| TNPO3     | transportin 3                  | chr7q32.1            | transport                                  | ---                                     | -1.20         | -1.12           | 1.03      | -1.03       | 1.16      | 1.09        | 1.05       | -1.11        | 1.33       | 1.35         | 1.34       | 1.58         |
| TNPO3     | transportin 3                  | chr7q32.1            | transport                                  | ---                                     | -1.07         | -1.18           | 1.03      | 1.06        | 1.14      | 1.19        | 1.08       | 1.04         | 1.29       | 1.22         | 1.37       | 1.41         |
| TNPO3     | transportin 3                  | chr7q32.1            | transport                                  | ---                                     | -1.10         | 1.01            | -1.08     | -1.02       | -1.08     | -1.06       | -1.08      | -1.02        | 1.20       | 1.22         | 1.30       | 1.36         |
| TNRC6A    | trinucleotide repeat contain   | chr16p11.2           | regulation of translation                  | ---                                     | 1.33          | 1.02            | 1.16      | 1.11        | 1.01      | 1.05        | -1.18      | -1.07        | -1.55      | -1.46        | -1.48      | -1.41        |
| TNRC6A    | trinucleotide repeat contain   | chr16p11.2           | regulation of translation                  | ---                                     | 1.15          | 1.11            | 1.05      | -1.02       | -1.09     | -1.11       | -1.38      | -1.10        | -3.71      | -2.05        | -3.24      | -2.81        |
| TNRC6B    | trinucleotide repeat contain   | chr22q13.1           | regulation of translation                  | ---                                     | 1.11          | 1.27            | 1.17      | -1.15       | -1.16     | 1.07        | -1.20      | -1.27        | -1.81      | -1.92        | -1.34      | -1.54        |

| ID                                          | Gene Title                         | Chromosomal Location      | 1st Gene Ontology Biological Process                                 | Pathway                                   | A2497 30 mins | A2497P' 30 mins | A2497 2 h | A2497P' 2 h | A2497 4 h | A2497P' 4 h | A2497 24 h | A2497P' 24 h | A2497 48 h | A2497P' 48 h | A2497 72 h | A2497P' 72 h |
|---------------------------------------------|------------------------------------|---------------------------|----------------------------------------------------------------------|-------------------------------------------|---------------|-----------------|-----------|-------------|-----------|-------------|------------|--------------|------------|--------------|------------|--------------|
| TNRC6B                                      | trinucleotide repeat contain       | chr22q13.1                | regulation of translation                                            | ---                                       | 1.12          | 1.20            | -1.04     | -1.04       | -1.19     | 1.03        | -1.39      | -1.12        | -1.43      | 1.06         | -1.53      | -1.50        |
| TNRC6B                                      | trinucleotide repeat contain       | chr22q13.1                | regulation of translation                                            | ---                                       | 1.06          | 1.04            | -1.01     | -1.04       | -1.08     | 1.12        | -1.18      | -1.14        | -1.53      | -1.29        | -1.35      | -1.50        |
| TNRC6B                                      | trinucleotide repeat contain       | chr22q13.1                | regulation of translation                                            | ---                                       | -1.22         | -1.04           | 1.04      | -1.12       | -1.36     | -1.30       | -1.04      | 1.06         | -1.55      | -1.33        | -1.07      | -1.20        |
| TNRC6C-AS                                   | TNRC6C antisense RNA 1             | chr17q25.3                | 0                                                                    | ---                                       | -1.01         | -1.04           | 1.06      | -1.12       | -1.04     | 1.01        | 1.52       | 1.81         | 1.22       | 1.38         | -1.23      | -1.06        |
| TNRC6C-AS                                   | TNRC6C antisense RNA 1             | chr17q25.3                | 0                                                                    | ---                                       | -1.62         | -1.16           | -2.59     | -1.83       | -1.56     | -1.17       | -1.95      | -1.00        | 1.09       | 1.25         | 1.46       | 2.18         |
| TNS1                                        | tensin 1                           | chr2q35-q36               | cell-substrate junction assembly                                     | Integrin-mediated_cell_adhesion_KEGG // C | 1.03          | -1.02           | 1.18      | 1.12        | -1.10     | 1.07        | 1.02       | 1.14         | 1.14       | 1.41         | -1.01      | 1.25         |
| TNS1                                        | tensin 1                           | chr2q35-q36               | cell-substrate junction assembly                                     | Integrin-mediated_cell_adhesion_KEGG // C | -1.11         | -1.07           | 1.08      | -1.05       | 1.12      | 1.17        | 1.07       | 1.08         | -1.02      | 1.34         | 1.19       | 1.50         |
| TNS3                                        | tensin 3                           | chr7p12.3                 | positive regulation of cell proliferation                            | ---                                       | -1.05         | -1.05           | -1.03     | 1.03        | -1.02     | -1.03       | -1.09      | -1.01        | -1.69      | -1.60        | -2.06      | -1.92        |
| TNS4                                        | tensin 4                           | chr17q21.2                | apoptotic process                                                    | ---                                       | -1.09         | -1.26           | -1.12     | 1.22        | 1.06      | 1.19        | 1.29       | 1.05         | 1.89       | 1.77         | 1.62       | 1.79         |
| TNS4                                        | tensin 4                           | chr17q21.2                | apoptotic process                                                    | ---                                       | -1.01         | 1.01            | 1.06      | 1.20        | -1.10     | -1.09       | 1.60       | 1.43         | 2.11       | 1.73         | 2.17       | 2.36         |
| TOE1                                        | target of EGR1, member 1           | chr1p33                   | 0                                                                    | ---                                       | 1.03          | -1.02           | 1.01      | 1.07        | 1.11      | 1.01        | -1.01      | -1.11        | -1.40      | -1.82        | -1.22      | -1.18        |
| TOLLIP                                      | toll interacting protein           | chr11p15.5                | inflammatory response                                                | ---                                       | -1.05         | 1.03            | 1.25      | 1.11        | 1.06      | 1.02        | -1.21      | -1.13        | -1.83      | -1.60        | -1.67      | -1.02        |
| TOM1                                        | target of myb1 (chicken)           | chr22q13.1                | transport                                                            | ---                                       | 1.05          | 1.02            | 1.10      | 1.23        | 1.05      | 1.06        | 1.52       | 1.74         | 1.65       | 1.37         | 1.98       | 2.14         |
| TOM1L1                                      | target of myb1 (chicken)-like      | chr17q23.2                | transport                                                            | ---                                       | 1.46          | 1.28            | 1.27      | 1.33        | 1.37      | 1.31        | 1.23       | 1.17         | 1.07       | 1.17         | 1.18       | -1.01        |
| TOMM20                                      | translocase of outer mitochondrion | chr1q42                   | protein targeting                                                    | ---                                       | -1.11         | -1.04           | 1.05      | 1.00        | 1.01      | 1.01        | 1.05       | -1.03        | 1.25       | 1.27         | 1.26       | 1.27         |
| TOMM22                                      | translocase of outer mitochondrion | chr22q12-q13              | protein targeting to mitochondrion                                   | ---                                       | 1.01          | -1.07           | -1.14     | -1.09       | 1.10      | -1.01       | 1.08       | 1.16         | 1.33       | 1.34         | 1.62       | 1.57         |
| TOMM34                                      | translocase of outer mitochondrion | ---                       | protein targeting to mitochondrion                                   | ---                                       | 1.07          | 1.06            | 1.02      | 1.01        | 1.05      | 1.01        | 1.20       | 1.10         | 1.69       | 1.41         | 1.28       | 1.22         |
| TOMM40L                                     | translocase of outer mitochondrion | chr1q23.3                 | transport                                                            | ---                                       | 1.12          | -1.06           | -1.03     | 1.03        | 1.07      | -1.04       | 1.19       | 1.12         | -1.12      | -1.26        | -1.45      | -1.17        |
| TOMM70A                                     | translocase of outer mitochondrion | chr3q12.2                 | protein targeting to mitochondrion                                   | ---                                       | -1.07         | 1.05            | -1.03     | 1.13        | 1.04      | -1.06       | 1.06       | 1.10         | -1.01      | -1.01        | 1.06       | 1.04         |
| TOMM70A                                     | translocase of outer mitochondrion | chr3q12.2                 | protein targeting to mitochondrion                                   | ---                                       | 1.02          | 1.04            | -1.01     | -1.03       | 1.17      | 1.20        | -1.05      | -1.09        | 1.14       | 1.05         | 1.44       | 1.42         |
| TONSL                                       | tonsoku-like, DNA repair protein   | chr8q24.3                 | double-strand break repair via homologous recombination              | ---                                       | 1.20          | 1.10            | -1.01     | 1.19        | -1.18     | -1.20       | 1.27       | 1.08         | -1.11      | -1.17        | -1.43      | -1.37        |
| TOP1                                        | topoisomerase (DNA) I              | chr20q12-q13.1            | DNA replication                                                      | ---                                       | -1.13         | -1.18           | 1.00      | 1.10        | 1.04      | 1.00        | 1.04       | 1.24         | 1.84       | 1.63         | 1.28       | 1.37         |
| TOP2A                                       | topoisomerase (DNA) II alpha       | chr17q21-q22              | mitotic cell cycle                                                   | ---                                       | -1.07         | -1.01           | 1.02      | -1.00       | -1.02     | -1.03       | 1.02       | 1.01         | 1.24       | 1.20         | 1.18       | 1.19         |
| TOP2B                                       | topoisomerase (DNA) II beta        | chr3p24                   | resolution of meiotic recombination intermediates                    | ---                                       | 1.09          | 1.10            | -1.06     | -1.08       | -1.13     | -1.02       | -1.10      | -1.05        | -1.16      | -1.04        | -1.38      | -1.50        |
| TOP3B                                       | topoisomerase (DNA) III beta       | chr22q11.22               | DNA topological change                                               | ---                                       | -1.05         | 1.19            | -1.05     | 1.20        | -1.05     | -1.13       | -1.21      | -1.23        | 1.58       | 1.64         | -1.22      | -1.53        |
| TOPBP1                                      | topoisomerase (DNA) II beta        | chr3q22.1                 | DNA metabolic process                                                | ---                                       | 1.08          | 1.12            | -1.03     | 1.01        | -1.01     | 1.07        | 1.02       | -1.60        | -1.47      | -1.45        | -1.45      | -1.45        |
| TOPORS-AS                                   | TOPORS antisense RNA 1             | chr9p21.1                 | 0                                                                    | ---                                       | 1.27          | 1.38            | -1.21     | -1.03       | -1.01     | -1.22       | 1.20       | -1.00        | 1.26       | 1.15         | 1.22       | 1.10         |
| TOPORS-AS                                   | TOPORS antisense RNA 1             | chr9p21.1                 | 0                                                                    | ---                                       | 1.16          | 1.12            | -1.00     | 1.07        | -1.09     | -1.17       | 1.31       | 1.31         | 1.50       | 1.26         | 1.21       | 1.19         |
| TOR1A                                       | torsin family 1, member A          | chr9q34                   | protein folding                                                      | ---                                       | -1.02         | -1.03           | -1.12     | 1.11        | -1.12     | -1.17       | 2.08       | 1.46         | 5.33       | 2.62         | 1.11       | -1.25        |
| TOR1A                                       | torsin family 1, member A          | chr9q34                   | protein folding                                                      | ---                                       | -1.05         | 1.01            | 1.00      | -1.04       | 1.01      | -1.02       | -1.02      | -1.05        | -1.15      | -1.23        | -1.17      | -1.26        |
| TOR1AIP1                                    | torsin A interacting protein       | chr1q24.2                 | protein localization to nucleus                                      | ---                                       | -1.13         | -1.13           | 1.04      | -1.09       | -1.18     | 1.02        | -1.04      | -1.02        | 1.34       | 1.29         | 1.46       | 1.49         |
| TOR1AIP2                                    | torsin A interacting protein       | chr1q25.2                 | 0                                                                    | ---                                       | 1.04          | 1.15            | 1.01      | -1.10       | 1.21      | -1.12       | -1.27      | -1.27        | -2.49      | -2.32        | -3.40      | -2.89        |
| TOR1AIP2                                    | torsin A interacting protein       | chr1q25.2                 | 0                                                                    | ---                                       | -1.06         | 1.07            | 1.15      | -1.08       | 1.06      | 1.10        | -1.19      | 1.04         | -1.23      | 1.12         | 1.31       | -1.10        |
| TOR1AIP2                                    | torsin A interacting protein       | chr1q25.2                 | 0                                                                    | ---                                       | 1.44          | 1.87            | -1.65     | 1.01        | 1.08      | -1.00       | 1.12       | 1.12         | 1.46       | 1.26         | 1.30       | -1.07        |
| TOR1AIP2                                    | torsin A interacting protein       | chr1q25.2                 | 0                                                                    | ---                                       | 1.02          | -1.00           | -1.03     | 1.01        | -1.02     | 1.12        | -1.20      | -1.11        | -1.27      | -1.28        | -1.19      | -1.32        |
| TOR1AIP2                                    | torsin A interacting protein       | chr1q25.2                 | 0                                                                    | ---                                       | 1.09          | 1.07            | -1.17     | -1.07       | -1.28     | -1.22       | -1.20      | -1.11        | -1.05      | 1.12         | 1.21       | 1.20         |
| TOR1B                                       | torsin family 1, member B          | chr9q34                   | response to unfolded protein                                         | ---                                       | -1.01         | 1.08            | 1.00      | -1.08       | 1.11      | 1.03        | -1.15      | -1.11        | -1.16      | -1.24        | 1.35       | 1.09         |
| TOR3A                                       | torsin family 3, member A          | chr1q25.2                 | chaperone mediated protein folding requirement                       | ---                                       | -1.01         | -1.03           | 1.06      | -1.00       | 1.13      | -1.01       | -1.13      | -1.14        | 1.28       | 1.42         | -1.18      | -1.16        |
| TOR4A                                       | torsin family 4, member A          | chr9q34.3                 | chaperone mediated protein folding requirement                       | ---                                       | -1.10         | -1.04           | -1.03     | 1.00        | -1.06     | -1.00       | -1.04      | 1.05         | 1.37       | 1.43         | 1.24       | 1.20         |
| TOR4A                                       | torsin family 4, member A          | chr9q34.3                 | chaperone mediated protein folding requirement                       | ---                                       | -1.26         | -1.27           | 1.14      | -1.05       | 1.03      | -1.08       | 1.31       | 1.30         | 2.03       | 2.10         | 1.76       | 1.98         |
| TOX                                         | thymocyte selection-associated     | chr8q12.1                 | 0                                                                    | ---                                       | -1.06         | 1.28            | -1.16     | 1.10        | 1.05      | -1.15       | 1.08       | 1.01         | -1.39      | -1.41        | -3.61      | -2.52        |
| TOX                                         | thymocyte selection-associated     | chr8q12.1                 | 0                                                                    | ---                                       | 1.29          | 1.20            | 1.11      | -1.07       | -1.24     | -1.04       | -1.02      | 1.06         | -1.68      | -1.34        | -1.72      | -2.19        |
| TP53                                        | tumor protein p53                  | chr17p13.1                | protein import into nucleus, translocation                           | Apoptosis // GenMAPP // Apoptosis_GenM    | -1.15         | -1.28           | 1.10      | 1.01        | 1.33      | 1.05        | 1.02       | -1.11        | -1.45      | -1.50        | -1.54      | -1.35        |
| TP53                                        | tumor protein p53                  | chr17p13.1                | protein import into nucleus, translocation                           | Apoptosis // GenMAPP // Apoptosis_GenM    | -1.00         | -1.03           | -1.13     | -1.17       | 1.04      | 1.13        | -1.02      | 1.05         | -1.38      | -1.01        | -1.33      | -1.42        |
| TP53BP1                                     | tumor protein p53 binding          | chr15q15-q21              | double-strand break repair via homologous recombination              | ---                                       | 1.02          | -1.00           | 1.01      | 1.03        | 1.08      | -1.05       | 1.01       | -1.06        | -1.35      | -1.27        | -1.19      | -1.18        |
| TP53I1                                      | tumor protein p53 inducible        | chr11p11.2                | response to stress                                                   | ---                                       | 1.13          | -1.31           | 1.64      | 1.92        | -1.83     | -1.14       | -1.14      | -1.75        | 1.17       | -1.57        | 1.13       | 1.32         |
| TP53I1                                      | tumor protein p53 inducible        | chr11p11.2                | response to stress                                                   | ---                                       | 1.67          | 1.04            | -1.14     | 1.06        | 1.47      | 1.70        | -1.68      | -1.05        | -1.01      | -1.11        | 1.05       | -1.23        |
| TP53I3                                      | tumor protein p53 inducible        | chr2p23.3                 | NADP metabolic process                                               | ---                                       | -1.00         | -1.03           | 1.08      | 1.16        | 1.05      | -1.05       | 1.01       | 1.06         | -2.60      | -2.31        | -3.66      | -3.12        |
| TP53INP1                                    | tumor protein p53 inducible        | chr8q22                   | transcription, DNA-dependent                                         | ---                                       | 1.19          | 1.06            | 1.11      | 1.15        | -1.17     | 1.01        | -1.96      | -1.38        | -3.36      | -2.91        | -3.60      | -4.53        |
| TP53INP2                                    | tumor protein p53 inducible        | chr20q11.22               | autophagic vacuole assembly                                          | ---                                       | -1.06         | -1.14           | 1.08      | 1.12        | 1.02      | 1.01        | -1.20      | -1.13        | -1.95      | -1.52        | -2.56      | -1.80        |
| TP53RK                                      | TP53 regulating kinase             | chr20q13.2                | protein phosphorylation                                              | ---                                       | -1.11         | -1.06           | 1.12      | 1.08        | 1.18      | 1.07        | -1.10      | -1.04        | -1.38      | -1.64        | -1.43      | -1.38        |
| TP53RK                                      | TP53 regulating kinase             | chr20q13.2                | protein phosphorylation                                              | ---                                       | -1.04         | -1.05           | 1.09      | 1.22        | 1.02      | 1.06        | 1.06       | 1.16         | 1.38       | 1.15         | 1.62       | 1.79         |
| TP53TG1                                     | TP53 target 1 (non-protein)        | chr7q21.1                 | response to stress                                                   | ---                                       | 1.14          | -1.00           | -1.10     | -1.13       | -1.25     | -1.10       | -1.70      | -1.04        | -1.29      | -1.08        | -2.27      | -1.65        |
| TP53TG1                                     | TP53 target 1 (non-protein)        | chr7q21.1                 | response to stress                                                   | ---                                       | -1.03         | -1.17           | -1.05     | -1.03       | -1.08     | -1.15       | -1.06      | -1.13        | -1.69      | -1.23        | -2.00      | -1.29        |
| TP53TG1                                     | TP53 target 1 (non-protein)        | chr7q21.1                 | response to stress                                                   | ---                                       | -1.16         | -1.06           | -1.02     | -1.05       | 1.22      | 1.13        | -1.25      | -1.06        | -1.86      | -1.43        | -2.04      | -1.61        |
| TP53TG3 /// TP53 target 3 /// TP53 target 3 | TP53 target 3 /// TP53 target 3    | chr16p11.2 /// chr16p11.2 | 0                                                                    | ---                                       | -1.48         | 2.32            | -1.86     | -3.51       | 5.07      | 2.79        | 4.56       | -1.15        | 1.91       | 2.57         | 7.37       | 1.62         |
| TP63                                        | tumor protein p63                  | chr3q28                   | negative regulation of transcription from RNA polymerase II promoter | ---                                       | 1.36          | 1.32            | 1.23      | -1.04       | 1.25      | 1.93        | -1.48      | -1.66        | -3.40      | -2.45        | -3.12      | -5.61        |
| TP73-AS1                                    | TP73 antisense RNA 1               | chr1p36.32                | 0                                                                    | ---                                       | -1.13         | -1.00           | 1.14      | -1.02       | -1.29     | -1.44       | 1.08       | -1.08        | -1.53      | -1.47        | 1.08       | -1.00        |
| TP73-AS1                                    | TP73 antisense RNA 1               | chr1p36.32                | 0                                                                    | ---                                       | -1.06         | -1.07           | 1.01      | 1.04        | 1.02      | 1.05        | 1.09       | 1.07         | -1.71      | -1.77        | -1.71      | -1.66        |
| TP73-AS1                                    | TP73 antisense RNA 1               | chr1p36.32                | 0                                                                    | ---                                       | -1.18         | 1.04            | -1.00     | -1.14       | 1.06      | -1.04       | -1.06      | 1.11         | -1.97      | -2.14        | -1.41      | -1.47        |
| TPBG                                        | trophoblast glycoprotein           | chr6q14-q15               | cell adhesion                                                        | ---                                       | 1.16          | 1.16            | -1.36     | -1.59       | -1.27     | 1.22        | 1.10       | 1.12         | 2.01       | 2.07         | 1.91       | 1.39         |
| TPBG                                        | trophoblast glycoprotein           | chr6q14-q15               | cell adhesion                                                        | ---                                       | 1.10          | 1.09            | 1.03      | -1.04       | -1.04     | 1.02        | 1.09       | -1.06        | 2.08       | 1.83         | 2.51       | 2.44         |
| TPBGL                                       | trophoblast glycoprotein-like      | chr11q13.4                | 0                                                                    | ---                                       | -1.38         | -1.81           | -1.13     | 1.08        | -1.00     | -1.15       | 1.29       | 1.41         | -1.05      | 1.24         | 1.51       | 1.99         |
| TPCN1                                       | two pore segment channel           | chr12q24.13               | transport                                                            | ---                                       | -1.02         | -1.17           | -1.04     | 1.20        | 1.01      | -1.19       | 1.04       | 1.24         | -1.48      | -1.48        | -1.82      | -1.47        |
| TPCN2                                       | two pore segment channel           | chr11q13.3                | cellular calcium ion homeostasis                                     | ---                                       | -1.01         | 1.13            | 1.02      | -1.06       | -1.13     | -1.22       | 1.07       | -1.15        | -1.50      | -1.34        | -2.27      | -2.08        |
| TPCN2                                       | two pore segment channel           | chr11q13.3                | transport                                                            | ---                                       | -1.01         | -1.11           | -1.01     | 1.05        | -1.03     | 1.00        | 1.12       | 1.34         | -1.19      | -1.38        | -2.67      | -2.50        |

| ID         | Gene Title                      | Chromosomal Location | 1st Gene Ontology Biological Process       | Pathway                                  | A2497 30 mins | A2497P' 30 mins | A2497 2 h | A2497P' 2 h | A2497 4 h | A2497P' 4 h | A2497 24 h | A2497P' 24 h | A2497 48 h | A2497P' 48 h | A2497 72 h | A2497P' 72 h |
|------------|---------------------------------|----------------------|--------------------------------------------|------------------------------------------|---------------|-----------------|-----------|-------------|-----------|-------------|------------|--------------|------------|--------------|------------|--------------|
| TPCN2      | two pore segment channel        | chr11q13.3           | transport                                  | ---                                      | 1.10          | 1.07            | 1.00      | -1.07       | -1.10     | -1.15       | -1.12      | -1.10        | -2.45      | -1.38        | -3.19      | -2.59        |
| TPCN2      | two pore segment channel        | chr11q13.3           | transport                                  | ---                                      | 1.46          | 1.45            | 1.40      | -1.01       | -1.24     | 1.37        | 1.89       | 1.33         | 2.69       | 2.01         | 2.78       | 2.73         |
| TPCN2      | two pore segment channel        | chr11q13.3           | transport                                  | ---                                      | -1.02         | -1.03           | -1.07     | 1.03        | 1.09      | -1.06       | 1.03       | 1.17         | -1.28      | -1.32        | -2.07      | -2.12        |
| TPD52      | tumor protein D52               | chr8q21              | anatomical structure morphogenesis         | ---                                      | 1.28          | 1.19            | 1.05      | 1.03        | -1.06     | 1.21        | -1.13      | -1.09        | -1.36      | -1.00        | -1.47      | -1.36        |
| TPD52      | tumor protein D52               | chr8q21              | anatomical structure morphogenesis         | ---                                      | 1.03          | 1.11            | -1.04     | -1.09       | -1.04     | -1.10       | -1.01      | -1.03        | -1.15      | -1.05        | -1.20      | -1.25        |
| TPD52L2    | tumor protein D52-like 2        | chr20q13.2-q13.3     | regulation of cell proliferation           | ---                                      | -1.03         | -1.01           | -1.04     | -1.09       | 1.04      | 1.01        | 1.05       | 1.02         | 1.20       | 1.04         | 1.16       | 1.11         |
| TPD52L3    | tumor protein D52-like 3        | chr9p24.1            | 0                                          | ---                                      | -1.06         | -2.74           | -1.71     | -1.39       | -3.71     | -6.67       | 3.11       | 1.15         | 8.19       | 5.77         | -2.07      | 1.14         |
| TPGS2      | tubulin polyglutamylase         | chr18q12.2           | 0                                          | ---                                      | 1.07          | -1.09           | 1.14      | -1.09       | -1.06     | -1.01       | -1.02      | -1.22        | -1.28      | -1.08        | -1.56      | -1.29        |
| TPGS2      | tubulin polyglutamylase         | chr18q12.2           | 0                                          | ---                                      | -1.03         | -1.03           | -1.07     | -1.03       | -1.04     | -1.02       | 1.05       | 1.04         | -1.11      | 1.06         | -1.97      | -1.96        |
| TP11       | triosephosphate isomerase       | chr12p13             | carbohydrate metabolic process             | Fatty_Acid_Degradation // GenMAPP /// GH | -1.08         | -1.01           | -1.06     | -1.03       | 1.02      | 1.01        | 1.11       | 1.06         | 1.25       | 1.16         | 1.17       | 1.29         |
| TP11       | triosephosphate isomerase       | chr12p13             | carbohydrate metabolic process             | Fatty_Acid_Degradation // GenMAPP /// GH | -1.07         | -1.03           | -1.09     | -1.00       | -1.01     | 1.00        | 1.03       | -1.00        | 1.23       | 1.17         | 1.06       | 1.18         |
| TPK1       | thiamin pyrophosphokinase       | chr7q34-q35          | vitamin metabolic process                  | ---                                      | 1.63          | 1.18            | 1.17      | 1.12        | 1.26      | -1.00       | -1.14      | 1.11         | 1.70       | 1.49         | 2.46       | 1.99         |
| TPK1       | thiamin pyrophosphokinase       | chr7q34-q35          | vitamin metabolic process                  | ---                                      | -1.30         | 1.02            | 1.09      | 1.04        | 1.47      | 1.82        | -1.26      | -1.46        | 2.39       | 2.35         | 1.84       | 1.88         |
| TPM1       | tropomyosin 1 (alpha)           | chr15q22.1           | in utero embryonic development             | Striated_muscle_contraction // GenMAPP   | 2.29          | -1.20           | 1.26      | 1.11        | 1.44      | -1.02       | -1.37      | 1.47         | -2.99      | -1.79        | -1.69      | -7.68        |
| TPM1       | tropomyosin 1 (alpha)           | chr15q22.1           | in utero embryonic development             | Striated_muscle_contraction // GenMAPP   | -1.15         | -1.01           | -1.10     | -1.05       | 1.19      | 1.21        | -1.02      | 1.08         | 1.43       | 1.44         | -1.37      | -1.56        |
| TPM1       | tropomyosin 1 (alpha)           | chr15q22.1           | in utero embryonic development             | Striated_muscle_contraction // GenMAPP   | -1.01         | 1.04            | -1.03     | 1.05        | -1.00     | 1.03        | -1.04      | 1.05         | -1.69      | -1.50        | -2.10      | -1.93        |
| TPM1       | tropomyosin 1 (alpha)           | chr15q22.1           | in utero embryonic development             | Striated_muscle_contraction // GenMAPP   | -1.06         | -1.08           | 1.27      | 1.10        | 1.26      | -1.07       | 1.32       | 1.05         | -1.02      | -1.26        | -1.67      | -1.79        |
| TPM1       | tropomyosin 1 (alpha)           | chr15q22.1           | in utero embryonic development             | Striated_muscle_contraction // GenMAPP   | -1.08         | -1.06           | -1.07     | -1.06       | 1.11      | 1.11        | -1.02      | -1.00        | -1.84      | -1.60        | -2.05      | -2.01        |
| TPM2       | tropomyosin 2 (beta)            | chr9p13              | muscle contraction                         | Striated_muscle_contraction // GenMAPP   | -1.07         | -1.03           | 1.07      | 1.06        | 1.07      | -1.05       | 1.13       | 1.04         | 1.20       | 1.13         | 1.12       | 1.07         |
| TPM2       | tropomyosin 2 (beta)            | chr9p13              | muscle contraction                         | Striated_muscle_contraction // GenMAPP   | 1.40          | -1.21           | -1.70     | -2.96       | 1.20      | -1.56       | -3.86      | -12.41       | 1.43       | 1.03         | -3.54      | 1.46         |
| TPM3       | tropomyosin 3                   | chr1q21.2            | cellular component movement                | ---                                      | -1.09         | -1.11           | 1.06      | 1.07        | -1.09     | 1.08        | -1.10      | 1.03         | 1.45       | 1.29         | -1.05      | -1.01        |
| TPM4       | tropomyosin 4                   | chr19p13.1           | cellular component movement                | Striated_muscle_contraction // GenMAPP   | -1.23         | -1.16           | -1.04     | -1.05       | 1.02      | 1.01        | 1.03       | 1.01         | 1.16       | 1.25         | 1.14       | 1.21         |
| TPM4       | tropomyosin 4                   | chr19p13.1           | cellular component movement                | Striated_muscle_contraction // GenMAPP   | -1.31         | -1.11           | 1.05      | 1.03        | 1.26      | 1.03        | 1.18       | 1.08         | 1.25       | 1.23         | 1.29       | 1.27         |
| TPM4       | tropomyosin 4                   | chr19p13.1           | cellular component movement                | Striated_muscle_contraction // GenMAPP   | -1.11         | -1.16           | 1.03      | 1.03        | 1.26      | 1.10        | 1.36       | 1.10         | 1.51       | 1.32         | 1.52       | 1.48         |
| TPMT       | thiopurine S-methyltransferase  | chr6p22.3            | nucleobase-containing compound metabo      | ---                                      | -1.21         | -1.16           | -1.33     | -1.07       | 1.18      | 1.14        | -1.53      | -1.39        | -1.16      | -1.17        | -1.20      | -1.16        |
| TPO        | thyroid peroxidase              | chr2p25              | thyroid hormone generation                 | ---                                      | 1.53          | -1.14           | -1.74     | -5.12       | 1.08      | -1.85       | -2.98      | -2.18        | 1.40       | 4.65         | 1.90       | 3.54         |
| TPP2       | tripeptidyl peptidase II        | chr13q32-q33         | protein polyubiquitination                 | ---                                      | -1.18         | -1.05           | -1.02     | 1.04        | -1.02     | 1.01        | 1.28       | 1.04         | -1.11      | -1.32        | -1.35      | -1.71        |
| TPP2       | tripeptidyl peptidase II        | chr13q32-q33         | protein polyubiquitination                 | ---                                      | 1.08          | 1.06            | 1.05      | -1.02       | -1.09     | 1.01        | -1.09      | -1.08        | -1.71      | -1.77        | -1.50      | -1.90        |
| TPP2       | tripeptidyl peptidase II        | chr13q32-q33         | protein polyubiquitination                 | ---                                      | 1.08          | 1.05            | 1.04      | -1.20       | -1.58     | -1.41       | -1.02      | 1.20         | -2.00      | -1.57        | -2.89      | -3.23        |
| TPP2       | tripeptidyl peptidase II        | chr13q32-q33         | protein polyubiquitination                 | ---                                      | -1.13         | -1.13           | 1.08      | -1.03       | 1.02      | 1.07        | 1.02       | 1.02         | -1.31      | -1.22        | -1.37      | -1.34        |
| TPPP       | tubulin polymerization protein  | chr5p15.3            | microtubule bundle formation               | ---                                      | -1.10         | 1.33            | 1.11      | -1.43       | 2.14      | 1.44        | 1.70       | 1.99         | 1.70       | 1.31         | -1.69      | -2.11        |
| TPPP       | tubulin polymerization protein  | chr5p15.3            | microtubule bundle formation               | ---                                      | 1.11          | 1.14            | -1.01     | -1.35       | -1.10     | -1.39       | -1.11      | -1.04        | -1.11      | -1.76        | -1.39      | -1.78        |
| TPPP3      | tubulin polymerization protein  | chr16q22.1           | microtubule bundle formation               | ---                                      | 1.01          | -1.51           | -1.37     | -1.03       | 1.38      | 1.10        | 1.80       | 1.96         | -6.86      | -3.52        | -9.80      | -2.85        |
| TPR        | translocated promoter region    | chr1q25              | negative regulation of transcription from  | ---                                      | 1.19          | 1.13            | 1.04      | 1.06        | -1.31     | -1.09       | -1.40      | -1.52        | -1.56      | -1.48        | -2.43      | -1.71        |
| TPR        | translocated promoter region    | chr1q25              | negative regulation of transcription from  | ---                                      | -1.06         | -1.02           | -1.00     | -1.02       | 1.06      | 1.02        | -1.06      | -1.05        | -1.09      | -1.04        | -1.15      | -1.19        |
| TPRA1      | transmembrane protein, adhesion | chr3q21.2            | lipid metabolic process                    | ---                                      | -1.04         | -1.09           | 1.02      | -1.10       | -1.01     | -1.18       | 1.11       | 1.09         | 1.13       | -1.10        | 1.75       | 1.66         |
| TPRN       | taperin                         | chr9q34.3            | sensory perception of sound                | ---                                      | 1.19          | 1.10            | -1.05     | -1.22       | 1.07      | -1.08       | 1.10       | 1.05         | 1.11       | -1.28        | 1.09       | 1.49         |
| TPST1      | tyrosylprotein sulfotransferase | chr7q11.21           | peptidyl-tyrosine sulfation                | ---                                      | 1.14          | 1.11            | -1.07     | -1.18       | 1.00      | 1.01        | 1.10       | 1.13         | 1.15       | 1.15         | 1.32       | 1.36         |
| TPST2      | tyrosylprotein sulfotransferase | chr22q11.2           | peptidyl-tyrosine sulfation                | ---                                      | -1.20         | 1.14            | -1.01     | 1.12        | 1.12      | 1.03        | 1.13       | 1.59         | 1.06       | 1.00         | 1.35       | 1.36         |
| TPX2       | TPX2, microtubule-associated    | chr20q11.2           | apoptotic process                          | ---                                      | 1.03          | 1.05            | 1.01      | 1.02        | 1.01      | -1.07       | -1.21      | -1.11        | 1.19       | 1.15         | 1.32       | 1.33         |
| TRA2A      | transformer 2 alpha homolog     | chr7p15.3            | mRNA splicing, via spliceosome             | ---                                      | 1.04          | 1.09            | -1.10     | -1.01       | -1.18     | 1.20        | -1.78      | -1.46        | -1.78      | -1.28        | -1.64      | -1.90        |
| TRA2A      | transformer 2 alpha homolog     | chr7p15.3            | mRNA splicing, via spliceosome             | ---                                      | -1.15         | 1.54            | -1.16     | -1.25       | -1.02     | 1.11        | 1.48       | -1.10        | -1.43      | -1.82        | -2.03      | -1.51        |
| TRA2A      | transformer 2 alpha homolog     | chr7p15.3            | mRNA splicing, via spliceosome             | ---                                      | 1.57          | 1.29            | 1.34      | 1.43        | -1.29     | -1.08       | 1.19       | -1.44        | -1.70      | -4.60        | -1.31      | -1.59        |
| TRA2A      | transformer 2 alpha homolog     | chr7p15.3            | mRNA splicing, via spliceosome             | ---                                      | -1.17         | -1.22           | 1.29      | 1.11        | -1.01     | 1.21        | -1.06      | -1.16        | -1.44      | -1.60        | -1.63      | -1.46        |
| TRA2B      | transformer 2 beta homolog      | chr3q26.2-q27        | response to reactive oxygen species        | mRNA_processing_Reactome // GenMAPP      | 1.44          | 1.31            | 1.43      | 1.33        | 1.89      | 2.01        | -1.15      | -1.11        | -1.79      | -1.22        | -1.14      | -2.52        |
| TRA2B      | transformer 2 beta homolog      | chr3q26.2-q27        | response to reactive oxygen species        | mRNA_processing_Reactome // GenMAPP      | 1.09          | 1.06            | 1.02      | -1.02       | 1.04      | -1.02       | -1.14      | -1.12        | -1.34      | -1.29        | -1.28      | -1.57        |
| TRA2B      | transformer 2 beta homolog      | chr3q26.2-q27        | response to reactive oxygen species        | mRNA_processing_Reactome // GenMAPP      | -1.07         | 1.01            | -1.09     | 1.01        | -1.14     | -1.05       | -1.11      | -1.02        | -1.07      | -1.13        | -1.26      | -1.33        |
| TRABD      | TraB domain containing          | chr22q13.33          | 0                                          | ---                                      | -1.03         | -1.15           | -1.27     | -1.21       | -1.05     | -1.15       | 1.30       | 1.58         | 1.29       | 1.52         | 2.19       | 2.26         |
| TRABD      | TraB domain containing          | chr22q13.33          | 0                                          | ---                                      | 2.32          | 1.85            | -1.08     | -1.27       | 2.75      | 1.77        | 1.32       | 1.19         | -1.75      | -1.68        | 1.32       | 1.05         |
| TRABD2B    | TraB domain containing 2B       | chr1p33              | proteolysis                                | ---                                      | -1.05         | -1.37           | -1.31     | 1.22        | 1.50      | -1.18       | 1.11       | 1.28         | 1.97       | 1.79         | -1.11      | -1.02        |
| TRABD2B    | TraB domain containing 2B       | chr1p33              | proteolysis                                | ---                                      | -2.15         | -2.23           | -1.07     | 1.09        | 1.08      | 1.38        | -1.24      | -1.11        | 2.19       | 2.72         | 1.25       | -2.12        |
| TRAF1      | TNF receptor-associated factor  | chr9q33-q34          | protein complex assembly                   | Apoptosis // GenMAPP /// Apoptosis_GenM  | 1.01          | -1.03           | 1.35      | 1.25        | -1.07     | -1.26       | -1.25      | -1.02        | 2.41       | 1.66         | 2.30       | 2.44         |
| TRAF1      | TNF receptor-associated factor  | chr9q33-q34          | protein complex assembly                   | Apoptosis // GenMAPP /// Apoptosis_GenM  | 1.28          | 1.66            | -2.41     | 1.13        | -1.18     | 1.14        | -1.58      | -2.58        | 5.06       | 3.64         | 2.54       | 4.09         |
| TRAF2      | TNF receptor-associated factor  | chr9q34              | positive regulation of T cell cytokine pro | Apoptosis // GenMAPP /// Apoptosis_GenM  | -1.06         | -1.34           | 1.17      | 1.31        | 1.06      | 1.04        | 1.20       | 1.13         | 1.72       | 1.12         | 1.88       | 1.87         |
| TRAF3      | TNF receptor-associated factor  | chr14q32.32          | regulation of cytokine production          | Apoptosis // GenMAPP /// Apoptosis_KEGG  | 1.03          | 1.12            | 1.08      | 1.18        | -1.10     | 1.11        | 1.14       | 1.20         | 1.10       | 1.10         | 1.66       | 1.55         |
| TRAF3IP1   | TNF receptor-associated factor  | chr2q37.3            | 0                                          | ---                                      | 1.18          | 1.12            | 1.02      | -1.05       | -1.08     | -1.04       | -1.29      | -1.13        | -1.99      | -1.67        | -1.60      | -1.77        |
| TRAF3IP2   | TRAF3 interacting protein       | chr6q21              | B cell apoptotic process                   | ---                                      | -1.22         | -1.16           | -1.01     | -1.08       | 1.06      | -1.05       | 1.14       | 1.00         | 1.25       | 1.09         | 1.28       | 1.55         |
| TRAF3IP2-A | TRAF3IP2 antisense RNA          | chr6q21              | 0                                          | ---                                      | 1.51          | 1.38            | 1.19      | 1.41        | 1.02      | -1.54       | 1.06       | 1.18         | -1.22      | -1.25        | -3.56      | -2.26        |
| TRAF3IP2-A | TRAF3IP2 antisense RNA          | chr6q21              | 0                                          | ---                                      | 1.05          | 1.09            | -1.08     | 1.06        | -1.16     | 1.09        | -1.04      | -1.15        | -1.33      | -1.24        | -1.67      | -2.05        |
| TRAF3IP3   | TRAF3 interacting protein       | chr1q32              | 0                                          | ---                                      | -3.58         | -5.70           | -2.94     | -2.23       | -2.16     | -1.68       | 2.90       | 1.03         | 3.98       | 1.84         | 3.57       | 3.01         |
| TRAF4      | TNF receptor-associated factor  | chr17q11-q12         | apoptotic process                          | ---                                      | 1.07          | 1.07            | 1.00      | -1.13       | 1.16      | 1.19        | 1.13       | 1.11         | 1.75       | 1.22         | 1.62       | 1.24         |
| TRAF4      | TNF receptor-associated factor  | chr17q11-q12         | apoptotic process                          | ---                                      | -1.41         | -1.21           | -1.07     | 1.06        | 1.08      | -1.00       | 1.01       | -1.08        | 1.31       | 1.15         | 1.87       | 1.42         |
| TRAF5      | TNF receptor-associated factor  | chr1q32              | apoptotic process                          | ---                                      | 1.06          | 1.02            | 1.19      | 1.14        | 1.04      | 1.09        | 1.16       | -1.02        | -1.33      | -1.29        | -1.42      | -1.21        |
| TRAF6      | TNF receptor-associated factor  | chr11p12             | negative regulation of transcription from  | Apoptosis_KEGG // GenMAPP                | -1.04         | -1.09           | 1.10      | -1.09       | 1.06      | 1.09        | -1.11      | -1.02        | -1.09      | -1.15        | 1.11       | -1.14        |
| TRAK1      | trafficking protein, kinesin    | chr3p22.1            | regulation of transcription from RNA po    | ---                                      | -1.01         | 1.10            | -1.03     | 1.14        | 1.24      | 1.20        | -1.11      | -1.38        | -1.06      | -1.28        | -1.53      | -1.45        |
| TRAK1      | trafficking protein, kinesin    | chr3p22.1            | regulation of transcription from RNA po    | ---                                      | 1.15          | 1.08            | -1.04     | -1.04       | 1.09      | 1.21        | 1.11       | -1.03        | 1.10       | 1.09         | 1.46       | 1.26         |

| ID           | Gene Title                    | Chromosomal Location | 1st Gene Ontology Biological Process      | Pathway | A2497 30 mins | A2497P' 30 mins | A2497 2 h | A2497P' 2 h | A2497 4 h | A2497P' 4 h | A2497 24 h | A2497P' 24 h | A2497 48 h | A2497P' 48 h | A2497 72 h | A2497P' 72 h |
|--------------|-------------------------------|----------------------|-------------------------------------------|---------|---------------|-----------------|-----------|-------------|-----------|-------------|------------|--------------|------------|--------------|------------|--------------|
| TRAK1        | trafficking protein, kinesin  | chr3p22.1            | regulation of transcription from RNA pol  | ---     | 1.04          | -1.01           | 1.25      | -1.00       | -1.04     | 1.03        | -1.03      | -1.08        | -1.66      | -1.67        | -1.77      | -1.85        |
| TRAK2        | trafficking protein, kinesin  | chr2q33              | regulation of transcription from RNA pol  | ---     | -1.00         | -1.09           | 1.03      | -1.00       | 1.02      | 1.09        | -1.32      | -1.13        | -2.75      | -2.40        | -2.60      | -2.56        |
| TRAK2        | trafficking protein, kinesin  | chr2q33              | regulation of transcription from RNA pol  | ---     | 1.07          | -1.04           | -1.14     | -1.27       | -1.10     | 1.03        | -1.16      | -1.26        | -3.29      | -2.78        | -2.39      | -2.58        |
| TRAM1        | translocation associated me   | chr8q13.3            | translation                               | ---     | 1.07          | 1.01            | -1.22     | -1.12       | -1.27     | -1.23       | -1.02      | -1.07        | 1.31       | 1.17         | -1.14      | 1.09         |
| TRAM1        | translocation associated me   | chr8q13.3            | translation                               | ---     | 1.10          | 1.10            | -1.02     | -1.00       | 1.00      | 1.06        | 1.00       | -1.12        | -1.18      | -1.23        | 1.01       | -1.06        |
| TRAM1L1      | translocation associated me   | chr4q26              | transport                                 | ---     | 1.22          | 1.39            | -1.18     | -1.35       | 1.99      | 1.45        | -1.11      | 1.35         | -1.73      | -2.27        | -2.67      | -2.69        |
| TRAM2        | translocation associated me   | chr6p21.1-p12        | transport                                 | ---     | -1.17         | -1.07           | 1.05      | 1.00        | 1.10      | 1.12        | -1.02      | 1.02         | -1.09      | 1.01         | 1.01       | 1.24         |
| TRAM2-AS1    | TRAM2 antisense RNA 1 (       | chr6p12.3            | 0                                         | ---     | 1.11          | 1.15            | -1.02     | -1.04       | -1.09     | -1.17       | -1.13      | 1.04         | -2.60      | -1.80        | -1.72      | -2.01        |
| TRAP1        | TNF receptor-associated pr    | chr16p13.3           | protein folding                           | ---     | -1.10         | -1.06           | 1.05      | 1.08        | 1.07      | -1.06       | 1.18       | 1.24         | 1.53       | 1.23         | 1.16       | 1.25         |
| TRAPPC10     | trafficking protein particle  | chr21q22.3           | transport                                 | ---     | 1.10          | 1.02            | 1.12      | 1.05        | 1.07      | 1.04        | -1.03      | 1.02         | -1.33      | -1.22        | -1.34      | -1.32        |
| TRAPPC11     | trafficking protein particle  | chr4q35.1            | transport                                 | ---     | 1.02          | 1.07            | 1.01      | 1.03        | -1.01     | -1.04       | -1.04      | 1.00         | -1.23      | 1.21         | -1.18      | -1.11        |
| TRAPPC2      | trafficking protein particle  | chrXp22              | skeletal system development               | ---     | 1.15          | 1.13            | 1.08      | 1.04        | 1.07      | 1.19        | -1.01      | -1.19        | -1.69      | -1.53        | -1.87      | -1.93        |
| TRAPPC2 ///  | trafficking protein particle  | chr19q13.4 /// chrX  | skeletal system development               | ---     | -1.18         | -1.13           | 1.11      | -1.00       | -1.01     | -1.07       | -1.18      | -1.01        | 1.02       | -1.02        | 1.43       | 1.45         |
| TRAPPC2L     | trafficking protein particle  | chr16q24.3           | transport                                 | ---     | -1.11         | -1.04           | -1.03     | -1.09       | -1.02     | -1.11       | 1.14       | 1.01         | 1.14       | 1.06         | -1.66      | -1.67        |
| TRAPPC3      | trafficking protein particle  | chr1p34.3            | transport                                 | ---     | 1.03          | -1.01           | -1.06     | -1.07       | -1.04     | -1.02       | -1.08      | -1.09        | 1.11       | 1.09         | 1.08       | 1.22         |
| TRAPPC3      | trafficking protein particle  | chr1p34.3            | transport                                 | ---     | -1.03         | -1.08           | -1.01     | 1.02        | -1.01     | -1.04       | -1.00      | 1.09         | 1.16       | 1.26         | 1.30       | 1.30         |
| TRAPPC3L     | trafficking protein particle  | chr6q22.1            | transport                                 | ---     | 1.30          | -1.04           | -1.21     | -1.02       | -1.41     | 1.09        | -1.26      | 1.02         | -1.60      | -1.43        | -2.33      | -1.96        |
| TRAPPC6B     | trafficking protein particle  | chr14q21.1           | transport                                 | ---     | 1.06          | 1.08            | 1.01      | -1.01       | 1.11      | 1.10        | -1.00      | 1.00         | 1.09       | 1.05         | 1.33       | 1.10         |
| TRAV10 /// T | T cell receptor alpha variab  | ---                  | 0                                         | ---     | 1.48          | 1.56            | -1.23     | 2.59        | 1.55      | 1.42        | -1.65      | -1.01        | 5.22       | 7.42         | -1.17      | -4.00        |
| TRAV25 /// T | T cell receptor alpha variab  | ---                  | 0                                         | ---     | -1.96         | -4.61           | -2.07     | -1.68       | 1.37      | -1.09       | -2.61      | -2.23        | 8.65       | 13.42        | 2.21       | 3.51         |
| TRBC1        | T cell receptor beta constan  | chr7q34              | immune response                           | ---     | -1.23         | -1.08           | -1.02     | -1.59       | 1.14      | 1.17        | -1.10      | -1.57        | 1.18       | -1.33        | -1.26      | -1.60        |
| TRBC1        | T cell receptor beta constan  | chr7q34              | immune response                           | ---     | -1.62         | -1.46           | -1.10     | -1.07       | 1.02      | -1.20       | -1.26      | -1.26        | 1.22       | 1.14         | -1.37      | -1.59        |
| TRBC1        | T cell receptor beta constan  | chr7q34              | immune response                           | ---     | 1.02          | -1.65           | 1.01      | 1.33        | -1.18     | 1.11        | -1.33      | -1.02        | 1.20       | 1.09         | -1.87      | -1.40        |
| TRDMT1       | tRNA aspartic acid methyl     | chr10p15.1           | response to amphetamine                   | ---     | -1.02         | -1.18           | 1.39      | 1.16        | -1.22     | -1.17       | 1.11       | 1.02         | -2.09      | -2.49        | -3.51      | -3.17        |
| TREM1        | triggering receptor expresse  | chr6p21.1            | humoral immune response                   | ---     | 1.76          | -1.44           | -1.49     | -1.86       | -4.17     | -1.26       | 1.11       | -1.11        | 5.79       | 4.38         | 6.49       | 6.23         |
| TRERF1       | transcriptional regulating fa | chr6p21.1-p12.1      | transcription, DNA-dependent              | ---     | -1.26         | -1.13           | 1.00      | -1.00       | 1.38      | 1.01        | 1.68       | 1.50         | 1.57       | 1.60         | 1.49       | 1.35         |
| TRERF1       | transcriptional regulating fa | chr6p21.1-p12.1      | transcription, DNA-dependent              | ---     | 1.15          | 1.18            | -1.02     | 1.01        | -1.09     | 1.05        | -1.31      | -1.18        | -2.41      | -1.50        | -1.86      | -1.48        |
| TREX1        | three prime repair exonucle   | chr3p21.31           | DNA metabolic process                     | ---     | -1.08         | -1.11           | -1.09     | 1.07        | 1.02      | -1.08       | 1.25       | 1.28         | 1.34       | 1.28         | 1.22       | 1.31         |
| TRIB1        | tribbles homolog 1 (Drosop    | chr8q24.13           | protein phosphorylation                   | ---     | -4.67         | -2.26           | -2.22     | 1.15        | 4.42      | -2.15       | 1.73       | 1.14         | 9.85       | 3.02         | 2.21       | 1.59         |
| TRIB2        | tribbles homolog 2 (Drosop    | chr2p24.3            | protein phosphorylation                   | ---     | 2.46          | 1.10            | 1.54      | 1.62        | -1.28     | 1.36        | 1.01       | 1.57         | -1.22      | -1.01        | 1.39       | 1.53         |
| TRIM10       | tripartite motif containing 1 | chr6p21.3            | erythrocyte differentiation               | ---     | -1.04         | 1.11            | 1.36      | 2.29        | -1.01     | 1.21        | 1.49       | 2.40         | 1.35       | 1.82         | 2.69       | 2.86         |
| TRIM11       | tripartite motif containing 1 | chr1q42.13           | protein ubiquitination                    | ---     | -1.08         | 1.06            | -1.01     | 1.10        | 1.29      | 1.21        | 1.41       | 1.10         | -1.07      | 1.28         | 1.41       | 1.25         |
| TRIM11       | tripartite motif containing 1 | chr1q42.13           | protein ubiquitination                    | ---     | -1.02         | -1.01           | 1.11      | -1.02       | 1.24      | 1.03        | 1.28       | 1.13         | 1.28       | 1.16         | 1.13       | 1.31         |
| TRIM13       | tripartite motif containing 1 | chr13q14             | signal transduction                       | ---     | -1.03         | 1.11            | 1.22      | 1.29        | 1.04      | -1.01       | 1.06       | 1.12         | -1.16      | -1.12        | 1.01       | -1.19        |
| TRIM13       | tripartite motif containing 1 | chr13q14             | signal transduction                       | ---     | 1.28          | 1.23            | 1.46      | 1.03        | -1.09     | 1.14        | -1.57      | -1.17        | -2.12      | -1.82        | -1.71      | -2.17        |
| TRIM13       | tripartite motif containing 1 | chr13q14             | signal transduction                       | ---     | -1.07         | -1.42           | 1.23      | 1.02        | 1.06      | 1.06        | -1.33      | -1.20        | -2.41      | -1.69        | -1.77      | -1.92        |
| TRIM14       | tripartite motif containing 1 | chr9q22.33           | 0                                         | ---     | -1.01         | -1.07           | 1.03      | 1.01        | 1.11      | 1.08        | 1.27       | 1.14         | -1.43      | -1.44        | -1.81      | -1.90        |
| TRIM14       | tripartite motif containing 1 | chr9q22.33           | 0                                         | ---     | -1.04         | -1.07           | -1.02     | -1.24       | 1.05      | -1.01       | 1.22       | 1.28         | -1.18      | -1.16        | -1.72      | -1.63        |
| TRIM14       | tripartite motif containing 1 | chr9q22.33           | 0                                         | ---     | 1.02          | -1.10           | -1.34     | 1.07        | -1.09     | -1.08       | 1.29       | 1.43         | -1.25      | -1.03        | -1.26      | -1.15        |
| TRIM15       | tripartite motif containing 1 | chr6p21.3            | mesodermal cell fate determination        | ---     | -1.21         | -2.17           | -1.19     | -1.40       | -1.04     | 1.03        | 1.44       | 4.34         | 2.36       | 2.07         | -1.40      | 2.12         |
| TRIM16       | tripartite motif containing 1 | chr17p11.2           | response to retinoic acid                 | ---     | -1.07         | -1.01           | -1.07     | -1.04       | -1.11     | -1.06       | 1.01       | -1.01        | 1.36       | 1.51         | 1.51       | 1.54         |
| TRIM2        | tripartite motif containing 2 | chr4q31.3            | protein ubiquitination                    | ---     | 1.03          | 1.09            | 1.17      | -1.12       | 1.14      | 1.11        | 1.04       | 1.02         | -2.65      | -2.05        | -3.52      | -2.50        |
| TRIM2        | tripartite motif containing 2 | chr4q31.3            | protein ubiquitination                    | ---     | -1.30         | -1.26           | 1.54      | 1.49        | 1.05      | 1.27        | 1.25       | 1.00         | -1.74      | -1.93        | -2.81      | -2.40        |
| TRIM2        | tripartite motif containing 2 | chr4q31.3            | protein ubiquitination                    | ---     | 1.07          | -1.23           | 1.35      | 1.23        | -1.71     | -1.05       | 1.32       | 1.66         | -1.24      | 1.71         | -1.41      | -2.47        |
| TRIM2        | tripartite motif containing 2 | chr4q31.3            | protein ubiquitination                    | ---     | 1.39          | 1.19            | -1.01     | -1.26       | -1.14     | -1.01       | -1.15      | -1.18        | -2.21      | -1.86        | -2.95      | -3.36        |
| TRIM21       | tripartite motif containing 2 | chr11p15.5           | protein polyubiquitination                | ---     | 1.29          | 1.41            | 1.07      | -1.06       | 1.06      | -1.02       | 1.22       | 1.14         | 1.26       | -1.31        | 1.41       | 1.09         |
| TRIM24       | tripartite motif containing 2 | chr7q32-q34          | transcription, DNA-dependent              | ---     | 1.32          | 1.46            | 1.02      | -1.08       | 1.38      | 1.40        | -1.16      | 1.25         | -4.66      | -5.26        | -3.38      | -2.98        |
| TRIM25       | tripartite motif containing 2 | chr17q23.2           | regulation of transcription, DNA-depend   | ---     | 1.02          | 1.02            | 1.01      | -1.15       | 1.04      | 1.05        | -1.08      | -1.05        | -1.57      | -1.41        | -1.51      | -1.62        |
| TRIM27       | tripartite motif containing 2 | chr6p22              | negative regulation of transcription from | ---     | -1.07         | -1.11           | -1.08     | 1.07        | 1.03      | -1.11       | -1.10      | -1.20        | -1.38      | -1.26        | 1.15       | 1.18         |
| TRIM27       | tripartite motif containing 2 | chr6p22              | negative regulation of transcription from | ---     | 1.04          | -1.03           | -1.04     | -1.02       | -1.05     | 1.03        | -1.07      | -1.02        | -1.17      | -1.14        | -1.03      | -1.01        |
| TRIM29       | tripartite motif containing 2 | chr11q23.3           | negative regulation of transcription from | ---     | -1.15         | -1.15           | 1.02      | -1.24       | 1.16      | 1.04        | -1.01      | -1.20        | -1.11      | 1.17         | 1.02       | 1.25         |
| TRIM31       | tripartite motif containing 3 | chr6p21.3            | protein ubiquitination                    | ---     | -1.52         | -2.08           | 1.02      | -2.37       | 2.01      | 2.29        | 1.37       | -1.03        | -1.11      | 1.07         | 1.15       | 1.33         |
| TRIM32       | tripartite motif containing 3 | chr9q33.1            | protein polyubiquitination                | ---     | -1.10         | -1.19           | 1.16      | 1.14        | 1.05      | 1.08        | -1.18      | -1.05        | -2.54      | -2.06        | -1.17      | -1.39        |
| TRIM32       | tripartite motif containing 3 | chr9q33.1            | protein polyubiquitination                | ---     | -1.09         | -1.02           | -1.00     | -1.07       | -1.02     | -1.05       | -1.07      | -1.05        | -1.47      | -1.35        | -1.14      | -1.19        |
| TRIM33       | tripartite motif containing 3 | chr1p13.1            | negative regulation of transcription from | ---     | 1.30          | 1.18            | -1.04     | -1.15       | -1.14     | 1.00        | -1.04      | -1.02        | -2.00      | -1.49        | -1.16      | -1.74        |
| TRIM35       | tripartite motif containing 3 | chr8p21.2            | apoptotic process                         | ---     | -1.01         | 1.04            | 1.13      | 1.07        | 1.03      | -1.05       | -1.03      | -1.17        | 1.23       | 1.03         | 1.36       | 1.29         |
| TRIM37       | tripartite motif containing 3 | chr17q23.2           | protein ubiquitination                    | ---     | 1.03          | -1.00           | 1.05      | 1.07        | 1.01      | 1.04        | -1.05      | -1.04        | -1.35      | -1.13        | -1.05      | -1.12        |
| TRIM37       | tripartite motif containing 3 | chr17q23.2           | protein ubiquitination                    | ---     | 1.08          | 1.01            | 1.07      | 1.10        | 1.08      | 1.06        | 1.21       | 1.09         | 1.58       | 1.68         | 2.05       | 2.22         |
| TRIM39 /// T | tripartite motif containing 3 | chr6p21.3            | apoptotic process                         | ---     | -1.17         | -1.16           | 1.02      | 1.14        | 1.20      | 1.03        | -1.00      | 1.04         | 1.18       | 1.20         | 1.33       | 1.52         |
| TRIM4        | tripartite motif containing 4 | chr7q22-q31.1        | protein trimerization                     | ---     | 1.20          | 1.17            | -1.01     | -1.16       | -1.07     | -1.00       | -1.11      | 1.07         | -1.66      | -1.46        | 1.05       | -1.19        |
| TRIM41       | tripartite motif containing 4 | chr5q35.3            | protein ubiquitination                    | ---     | -1.02         | -1.09           | 1.04      | 1.07        | 1.08      | -1.11       | -1.02      | -1.01        | -1.02      | -1.39        | 1.24       | 1.39         |
| TRIM43 /// T | tripartite motif containing 4 | chr2q11.1            | 0                                         | ---     | 1.27          | 1.35            | 1.38      | 1.98        | 1.32      | 1.37        | -1.98      | 1.05         | 3.89       | 2.71         | -2.52      | 1.15         |
| TRIM44       | tripartite motif containing 4 | chr11p13             | 0                                         | ---     | -1.02         | -1.11           | -1.00     | 1.03        | 1.08      | 1.11        | -1.05      | -1.08        | -1.09      | -1.05        | -1.47      | -1.35        |
| TRIM44       | tripartite motif containing 4 | chr11p13             | 0                                         | ---     | 1.03          | 1.05            | 1.00      | 1.00        | -1.01     | 1.01        | 1.09       | 1.06         | -1.06      | -1.03        | -1.33      | -1.37        |
| TRIM45       | tripartite motif containing 4 | chr1p13.1            | bone development                          | ---     | 1.17          | 1.17            | 1.06      | 1.08        | 1.15      | 1.09        | -1.12      | -1.04        | -1.73      | -1.50        | -1.67      | -1.77        |
| TRIM46       | tripartite motif containing 4 | chr1q22              | 0                                         | ---     | 1.09          | 1.25            | 1.42      | 1.26        | -1.32     | -1.01       | 1.31       | -1.02        | -2.56      | -2.21        | -3.35      | -5.00        |

| ID           | Gene Title                    | Chromosomal Location | 1st Gene Ontology Biological Process       | Pathway | A2497 30 mins | A2497P' 30 mins | A2497 2 h | A2497P' 2 h | A2497 4 h | A2497P' 4 h | A2497 24 h | A2497P' 24 h | A2497 48 h | A2497P' 48 h | A2497 72 h | A2497P' 72 h |
|--------------|-------------------------------|----------------------|--------------------------------------------|---------|---------------|-----------------|-----------|-------------|-----------|-------------|------------|--------------|------------|--------------|------------|--------------|
| TRIM47       | tripartite motif containing 4 | chr17q25             | 0                                          | ---     | 1.01          | -1.03           | -1.09     | 1.05        | 1.02      | -1.11       | 1.29       | 1.27         | 1.58       | 1.19         | 1.21       | 1.34         |
| TRIM5        | tripartite motif containing 5 | chr11p15             | activation of innate immune response       | ---     | 1.05          | -1.38           | 1.47      | 2.28        | -1.10     | 1.63        | 1.02       | -1.03        | 1.29       | 1.67         | 1.48       | 2.54         |
| TRIM52       | tripartite motif containing 5 | chr5q35.3            | 0                                          | ---     | 1.26          | 1.36            | 1.14      | 1.07        | -1.01     | 1.02        | -1.25      | -1.02        | -2.11      | -1.78        | -1.89      | -1.81        |
| TRIM52       | tripartite motif containing 5 | chr5q35.3            | 0                                          | ---     | -1.02         | -1.06           | 1.08      | 1.04        | -1.03     | 1.04        | -1.03      | -1.06        | -2.00      | -1.58        | -1.38      | -1.29        |
| TRIM56       | tripartite motif containing 5 | chr7q22.1            | regulation of type I interferon production | ---     | -1.22         | -1.32           | 1.18      | 1.27        | 1.02      | 1.00        | -1.02      | -1.04        | 1.13       | 1.02         | -1.02      | 1.31         |
| TRIM59       | tripartite motif containing 5 | chr3q25.33           | protein ubiquitination                     | ---     | -1.14         | 1.04            | 1.27      | 1.08        | -1.17     | -1.03       | -1.86      | -1.35        | -2.41      | -1.86        | -2.05      | -2.39        |
| TRIM59       | tripartite motif containing 5 | chr3q25.33           | protein ubiquitination                     | ---     | -1.29         | -1.02           | -1.10     | 1.01        | 1.03      | 1.10        | -1.37      | 1.19         | -1.59      | -2.21        | -2.11      | -2.46        |
| TRIM6        | tripartite motif containing 6 | chr11p15.4           | protein trimerization                      | ---     | 1.10          | -1.01           | -1.05     | 1.24        | 1.28      | 1.13        | -1.18      | -1.12        | -1.56      | -1.32        | -1.98      | -1.58        |
| TRIM62       | tripartite motif containing 6 | chr1p35.1            | 0                                          | ---     | 1.17          | -1.03           | -1.15     | -1.06       | -1.03     | 1.04        | -1.16      | 1.07         | 1.38       | 1.94         | -1.43      | -1.32        |
| TRIM66       | tripartite motif containing 6 | chr11p15.4           | negative regulation of transcription, DNA  | ---     | -1.07         | -1.28           | -1.08     | 1.06        | 1.26      | 1.07        | -1.05      | -1.07        | -2.02      | -1.99        | -2.55      | -2.12        |
| TRIM66       | tripartite motif containing 6 | chr11p15.4           | negative regulation of transcription, DNA  | ---     | 1.33          | -1.06           | 1.36      | -1.10       | 1.24      | 1.08        | -1.08      | -1.27        | -3.21      | -3.11        | -5.00      | -2.41        |
| TRIM67       | tripartite motif containing 6 | chr1q42.2            | positive regulation of neuron projection e | ---     | 1.28          | 1.17            | -1.32     | -1.13       | 1.50      | -1.15       | -1.15      | 1.10         | 2.57       | 1.91         | 1.08       | -1.08        |
| TRIM68       | tripartite motif containing 6 | chr11p15.4           | protein ubiquitination                     | ---     | 1.15          | 1.10            | 1.07      | 1.07        | 1.06      | -1.01       | -1.23      | 1.04         | -1.68      | -1.70        | -1.35      | -1.32        |
| TRIM69       | tripartite motif containing 6 | chr15q21.1           | apoptotic process                          | ---     | -1.00         | -1.11           | -1.07     | -1.03       | 1.07      | 1.06        | -1.04      | -1.03        | -1.36      | -1.21        | 1.17       | 1.24         |
| TRIM7        | tripartite motif containing 7 | chr5q35.3            | 0                                          | ---     | -1.03         | -1.08           | 1.07      | 1.28        | -1.04     | -1.18       | 1.25       | 1.32         | -1.02      | -1.28        | -1.38      | -1.43        |
| TRIM7        | tripartite motif containing 7 | chr5q35.3            | 0                                          | ---     | -2.07         | -1.42           | 1.52      | -1.60       | -1.11     | 1.33        | -2.02      | -1.49        | -2.51      | -1.27        | 1.05       | -1.45        |
| TRIM7        | tripartite motif containing 7 | chr5q35.3            | 0                                          | ---     | -1.04         | -1.02           | 1.03      | 1.03        | 1.02      | -1.12       | 1.01       | 1.09         | -1.36      | -1.56        | -1.11      | -1.09        |
| TRIM73 /// T | tripartite motif containing 7 | chr7q11.23           | 0                                          | ---     | -1.25         | -1.70           | 1.26      | 2.62        | -1.81     | 1.41        | -1.25      | 1.82         | 1.06       | -1.58        | -1.18      | 2.03         |
| TRIM8        | tripartite motif containing 8 | chr10q24.3           | protein ubiquitination                     | ---     | 1.26          | 1.10            | -1.21     | -1.12       | -1.19     | -1.07       | -1.15      | -1.13        | -1.02      | -1.09        | -1.02      | -1.06        |
| TRIM9        | tripartite motif containing 9 | chr14q22.1           | synaptic vesicle exocytosis                | ---     | -1.19         | 1.09            | -1.41     | 1.04        | -1.91     | -2.69       | 2.11       | 1.96         | -1.01      | -1.45        | -1.31      | -1.26        |
| TRIO         | trio Rho guanine nucleotide   | chr5p15.2            | apoptotic process                          | ---     | 1.00          | -1.75           | -1.03     | 1.37        | 1.52      | -1.18       | -1.87      | -1.38        | 1.43       | 2.01         | -1.20      | -1.27        |
| TRIO         | trio Rho guanine nucleotide   | chr5p15.2            | protein phosphorylation                    | ---     | 1.36          | 1.27            | 1.06      | -1.09       | 1.15      | 1.08        | 1.10       | -1.01        | -2.14      | -2.17        | -1.77      | -2.07        |
| TRIOBP       | TRIO and F-actin binding      | chr22q13.1           | cell cycle                                 | ---     | 1.12          | 1.05            | -1.10     | -1.07       | 1.19      | 1.01        | -1.11      | -1.06        | -1.80      | -2.13        | -1.80      | -1.64        |
| TRIP10       | thyroid hormone receptor      | chr19p13.3           | endocytosis                                | ---     | -1.06         | -1.04           | 1.10      | 1.06        | 1.12      | 1.03        | 1.25       | 1.09         | 1.41       | 1.17         | 1.37       | 1.41         |
| TRIP11       | thyroid hormone receptor      | chr14q31-q32         | protein targeting to Golgi                 | ---     | 1.43          | 1.53            | 1.21      | -1.07       | 1.63      | 1.63        | -1.49      | -1.08        | -2.01      | -1.84        | -2.01      | -2.06        |
| TRIP11       | thyroid hormone receptor      | chr14q31-q32         | protein targeting to Golgi                 | ---     | -1.09         | -1.07           | -1.05     | -1.04       | -1.14     | -1.15       | -1.05      | -1.02        | -1.49      | -1.35        | -1.07      | 1.01         |
| TRIP12       | NULL                          | ---                  | DNA repair                                 | ---     | 1.00          | 1.04            | 1.00      | 1.07        | -1.07     | 1.02        | -1.19      | -1.04        | -1.30      | -1.29        | -1.64      | -1.58        |
| TRIP12       | thyroid hormone receptor      | chr2q36.3            | DNA repair                                 | ---     | -1.03         | 1.02            | -1.00     | 1.05        | -1.02     | 1.10        | 1.04       | 1.01         | 1.13       | 1.02         | 1.32       | 1.16         |
| TRIQK        | triple QxxK/R motif containi  | chr8q22.1            | 0                                          | ---     | 1.11          | 1.02            | 1.16      | 1.11        | 1.19      | 1.21        | 1.08       | -1.08        | -1.03      | 1.10         | 1.50       | 1.15         |
| TRIQK        | triple QxxK/R motif containi  | chr8q22.1            | 0                                          | ---     | 1.08          | -1.00           | 1.22      | 1.26        | 1.04      | 1.23        | -1.18      | -1.06        | -1.39      | 1.04         | -1.06      | -1.04        |
| TRMT10B      | tRNA methyltransferase 10     | chr9p13.2            | methylation                                | ---     | -1.29         | -1.26           | 1.01      | -1.02       | 1.25      | 1.21        | 1.04       | -1.02        | -1.73      | -1.50        | -1.70      | -1.39        |
| TRMT11       | tRNA methyltransferase 11     | chr6q11.1-q22.33     | tRNA processing                            | ---     | 1.31          | 1.38            | -1.07     | 1.16        | 1.02      | -1.01       | 1.25       | 1.20         | 1.24       | 1.07         | 1.42       | 1.04         |
| TRMT13       | tRNA methyltransferase 13     | chr1p21.2            | tRNA processing                            | ---     | 1.06          | 1.27            | 1.10      | 1.03        | -1.09     | -1.10       | -1.16      | -1.18        | -2.16      | -2.05        | -1.15      | -1.34        |
| TRMT13       | tRNA methyltransferase 13     | chr1p21.2            | tRNA processing                            | ---     | 1.65          | 1.46            | -1.02     | 1.07        | 1.17      | 1.28        | 1.22       | 1.54         | -2.29      | -2.63        | -2.17      | -1.79        |
| TRMT1L       | tRNA methyltransferase 1      | chr1q25.2            | behavior                                   | ---     | 1.14          | 1.04            | 1.13      | 1.14        | 1.18      | 1.06        | -1.20      | -1.29        | 1.24       | 1.23         | 1.76       | 1.71         |
| TRMT1L       | tRNA methyltransferase 1      | chr1q25.2            | behavior                                   | ---     | 1.09          | 1.09            | 1.07      | 1.18        | 1.07      | 1.04        | -1.34      | -1.23        | -1.79      | -1.89        | -1.59      | -1.45        |
| TRMT1L       | tRNA methyltransferase 1      | chr1q25.2            | behavior                                   | ---     | 1.29          | 1.29            | 1.03      | -1.15       | -1.48     | -1.23       | -1.64      | -1.32        | -2.18      | -1.76        | -1.49      | -1.91        |
| TRMT2B       | tRNA methyltransferase 2      | chrXq22.1            | tRNA processing                            | ---     | -1.11         | -1.00           | 1.14      | -1.30       | 1.18      | -1.04       | -1.06      | -1.28        | -2.04      | -1.84        | -1.32      | -1.92        |
| TRMT44       | tRNA methyltransferase 44     | chr4p16.1            | tRNA processing                            | ---     | 1.79          | 1.51            | 1.12      | 1.38        | -1.19     | 1.14        | -1.55      | 1.28         | 1.46       | -1.09        | 1.57       | 1.75         |
| TRMT44       | tRNA methyltransferase 44     | chr4p16.1            | tRNA processing                            | ---     | 1.25          | 1.10            | 1.46      | 1.60        | 1.02      | -1.11       | 1.27       | -1.25        | -1.21      | 1.14         | 1.65       | 1.40         |
| TRMT5        | tRNA methyltransferase 5      | chr14q23.1           | tRNA processing                            | ---     | -1.01         | -1.06           | -1.04     | -1.01       | -1.04     | -1.04       | 1.19       | 1.12         | 1.36       | 1.20         | 1.53       | 1.66         |
| TRMT5        | tRNA methyltransferase 5      | chr14q23.1           | tRNA processing                            | ---     | 1.01          | 1.10            | -1.06     | -1.06       | -1.06     | -1.09       | 1.01       | -1.07        | 1.04       | -1.02        | -1.12      | -1.16        |
| TRMT6        | tRNA methyltransferase 6      | chr20p12.3           | translational initiation                   | ---     | -1.06         | -1.09           | 1.06      | -1.17       | 1.05      | 1.06        | -1.12      | 1.03         | -1.02      | -1.13        | 1.11       | 1.26         |
| TRMT61A      | tRNA methyltransferase 61     | chr14q32             | tRNA processing                            | ---     | 1.08          | 1.09            | 1.03      | 1.18        | -1.19     | -1.16       | 1.31       | 1.07         | -1.11      | -1.27        | -1.62      | -1.54        |
| TRMT61B      | tRNA methyltransferase 61     | chr2p23.2            | cellular protein modification process      | ---     | 1.14          | 1.15            | 1.06      | -1.02       | 1.08      | -1.00       | -1.17      | -1.14        | -1.75      | -1.67        | -1.13      | -1.24        |
| TRMU         | tRNA 5-methylaminomethyl      | chr22q13             | tRNA metabolic process                     | ---     | 1.00          | -1.10           | -1.07     | 1.09        | -1.03     | -1.21       | -1.39      | -1.17        | 1.18       | 1.19         | 1.31       | 1.53         |
| TRNAU1AP     | tRNA selenocysteine 1 ass     | chr1p35.3            | selenocysteine incorporation               | ---     | -1.21         | -1.12           | 1.18      | 1.11        | -1.04     | -1.09       | -1.17      | -1.08        | -2.19      | -2.17        | -2.36      | -1.46        |
| TRNAU1AP     | tRNA selenocysteine 1 ass     | chr1p35.3            | selenocysteine incorporation               | ---     | -1.02         | -1.03           | 1.08      | -1.06       | 1.10      | -1.03       | 1.05       | -1.03        | -1.45      | -1.46        | -1.52      | -1.48        |
| TRNP1        | TMF1-regulated nuclear pre    | chr1p36.11           | transcription, DNA-dependent               | ---     | -1.24         | -1.04           | -1.06     | 1.01        | -1.52     | -1.25       | -1.38      | -1.87        | -2.23      | -1.64        | -1.11      | -3.74        |
| TRNT1        | tRNA nucleotidyl transfera    | chr3p25.1            | tRNA 3'-terminal CCA addition              | ---     | 1.10          | 1.35            | -1.02     | -1.13       | 1.16      | 1.16        | 1.34       | 1.35         | -1.02      | -1.49        | -1.59      | -1.95        |
| TROAP        | trophinin associated protein  | chr12q13.12          | cell adhesion                              | ---     | 1.07          | 1.06            | -1.01     | 1.24        | -1.14     | -1.07       | -1.06      | -1.02        | 1.54       | 1.17         | 1.60       | 1.63         |
| TROVE2       | TROVE domain family, me       | chr1q31              | transcription from RNA polymerase III p    | ---     | -1.08         | 1.13            | -1.12     | -1.28       | -1.07     | 1.02        | 1.60       | 1.22         | 1.55       | 1.55         | 1.09       | -1.20        |
| TROVE2       | TROVE domain family, me       | chr1q31              | transcription from RNA polymerase III p    | ---     | 1.00          | 1.09            | 1.02      | -1.15       | 1.02      | -1.05       | -1.31      | -1.26        | -1.31      | -1.12        | -1.20      | -1.18        |
| TRPA1        | transient receptor potential  | chr8q13              | transport                                  | ---     | -1.10         | -1.09           | 1.10      | -1.11       | -1.18     | -1.14       | -1.15      | 1.35         | 1.47       | 1.33         | 6.65       | 5.53         |
| TRPC1        | transient receptor potential  | chr3q23              | transport                                  | ---     | 1.29          | 1.16            | 1.15      | 1.03        | 1.22      | 1.02        | 1.09       | 1.06         | -1.93      | -1.69        | -1.67      | -1.80        |
| TRPC1        | transient receptor potential  | chr3q23              | transport                                  | ---     | 1.39          | 1.14            | -1.18     | 1.09        | -1.07     | 1.17        | -1.30      | -1.45        | -1.57      | -1.31        | -1.44      | -1.51        |
| TRPC4        | transient receptor potential  | chr13q13.3           | transport                                  | ---     | -2.66         | 2.12            | 1.89      | -2.08       | 1.36      | 1.70        | -1.06      | 1.53         | -1.11      | -1.64        | -1.42      | 1.29         |
| TRPC5OS      | TRPC5 opposite strand         | ---                  | 0                                          | ---     | -1.21         | 2.00            | -1.02     | 1.34        | -3.16     | -2.81       | -1.58      | -1.17        | -1.22      | 1.41         | 1.81       | 2.02         |
| TRPC6        | transient receptor potential  | chr11q22.1           | transport                                  | ---     | 1.39          | 1.75            | 2.48      | 1.27        | 1.06      | -1.95       | 6.99       | 5.33         | 1.33       | -1.09        | -16.99     | -2.12        |
| TRPM4        | transient receptor potential  | chr19q13.33          | dendritic cell chemotaxis                  | ---     | -1.01         | 1.26            | 5.09      | 2.15        | -2.06     | -1.51       | 3.23       | 3.88         | 3.21       | 1.99         | 3.54       | 6.72         |
| TRPM6        | transient receptor potential  | chr9q21.13           | response to toxic substance                | ---     | -2.67         | 1.36            | 1.39      | 1.34        | -1.13     | -1.34       | -4.41      | -1.08        | 1.17       | 1.17         | -1.38      | 1.37         |
| TRPM7        | transient receptor potential  | chr15q21             | protein phosphorylation                    | ---     | 1.27          | 1.11            | 1.08      | 1.10        | 1.05      | 1.30        | -1.12      | 1.10         | -2.17      | -2.47        | -3.38      | -2.17        |
| TRPM7        | transient receptor potential  | chr15q21             | cell death                                 | ---     | -1.16         | -1.22           | 1.03      | 1.15        | 1.13      | 1.02        | 1.07       | 1.02         | -1.88      | -1.56        | -1.26      | -1.47        |
| TRPM7        | transient receptor potential  | chr15q21             | protein phosphorylation                    | ---     | 1.17          | 1.13            | -1.09     | 1.10        | 1.12      | -1.11       | 1.43       | 1.30         | -1.66      | -1.72        | -1.32      | -1.13        |
| TRPM7        | transient receptor potential  | chr15q21             | protein phosphorylation                    | ---     | 1.04          | 1.05            | 1.06      | 1.16        | -1.14     | -1.16       | 1.00       | -1.15        | -2.56      | -2.35        | -1.70      | -1.69        |
| TRPS1        | trichorhinophalangeal synd    | chr8q24.12           | negative regulation of transcription from  | ---     | -1.06         | -1.17           | 1.19      | 1.22        | 1.50      | 1.20        | 1.03       | -1.15        | 1.75       | 1.68         | -1.03      | -1.04        |

| ID      | Gene Title                           | Chromosomal Location | 1st Gene Ontology Biological Process      | Pathway                                | A2497 30 mins | A2497P' 30 mins | A2497 2 h | A2497P' 2 h | A2497 4 h | A2497P' 4 h | A2497 24 h | A2497P' 24 h | A2497 48 h | A2497P' 48 h | A2497 72 h | A2497P' 72 h |
|---------|--------------------------------------|----------------------|-------------------------------------------|----------------------------------------|---------------|-----------------|-----------|-------------|-----------|-------------|------------|--------------|------------|--------------|------------|--------------|
| TRPT1   | tRNA phosphotransferase              | chr11q13.1           | tRNA splicing, via endonucleolytic cleav  | ---                                    | -1.06         | -1.15           | 1.01      | 1.01        | 1.06      | -1.05       | 1.15       | 1.05         | 1.65       | 1.55         | 1.18       | 1.32         |
| TRRAP   | transformation/transcription         | chr7q21.2-q22.1      | transcription, DNA-dependent              | ---                                    | 1.04          | 1.11            | 1.03      | -1.14       | -1.31     | -1.04       | 1.05       | 1.13         | -1.52      | -1.53        | -1.17      | -1.51        |
| TRUB2   | TruB pseudouridine (psi) synthetase  | chr9q34.11           | pseudouridine synthesis                   | ---                                    | 1.01          | -1.01           | -1.03     | 1.06        | -1.03     | -1.09       | 1.07       | 1.02         | -1.27      | -1.26        | -1.57      | -1.25        |
| TSACK   | TSSK6 activating co-chaperone        | chr11q22.0           | 0                                         | ---                                    | -1.00         | 1.21            | 1.12      | 1.46        | 1.37      | 1.45        | -1.79      | 1.30         | -1.55      | -2.09        | 1.07       | 1.31         |
| TSC1    | tuberous sclerosis 1                 | chr9q34              | kidney development                        | ---                                    | 1.03          | 1.03            | 1.16      | 1.24        | 1.07      | 1.00        | -1.05      | -1.01        | -1.48      | -1.57        | -1.22      | -1.13        |
| TSC2    | tuberous sclerosis 2                 | chr16p13.3           | response to hypoxia                       | ---                                    | -1.06         | -1.10           | 1.03      | 1.29        | 1.08      | -1.03       | 1.23       | 1.21         | -1.14      | -1.35        | -1.63      | -1.31        |
| TSC22D1 | TSC22 domain family, member 1        | chr13q14             | transcription, DNA-dependent              | ---                                    | -1.08         | -1.01           | -1.05     | 1.02        | 1.04      | 1.00        | 1.04       | 1.00         | 1.30       | 1.26         | 1.22       | 1.17         |
| TSC22D1 | TSC22 domain family, member 1        | chr13q14             | transcription, DNA-dependent              | ---                                    | 1.07          | 1.32            | -1.11     | 1.13        | 2.22      | 2.09        | 1.64       | 1.40         | 1.55       | 1.62         | 1.23       | -1.04        |
| TSC22D2 | TSC22 domain family, member 2        | chr3q25.1            | regulation of transcription, DNA-depend   | ---                                    | 1.11          | 1.20            | -1.06     | 1.22        | -1.31     | -1.17       | -1.26      | -1.36        | 1.75       | 1.33         | -2.15      | -1.35        |
| TSC22D3 | TSC22 domain family, member 3        | chrXq22.3            | negative regulation of transcription from | ---                                    | -1.13         | 1.15            | 1.12      | -1.04       | 1.42      | 1.17        | 1.06       | -1.00        | -1.13      | 1.13         | -1.18      | 1.19         |
| TSEN15  | tRNA splicing endonuclease           | chr1q25              | tRNA splicing, via endonucleolytic cleav  | ---                                    | 1.22          | 1.05            | 1.05      | 1.13        | -1.16     | 1.21        | -1.13      | -1.11        | -1.69      | -1.38        | -1.04      | -1.20        |
| TSEN15  | tRNA splicing endonuclease           | chr1q25              | tRNA splicing, via endonucleolytic cleav  | ---                                    | -1.04         | -1.15           | -1.09     | 1.03        | 1.08      | 1.07        | -1.02      | -1.11        | 1.83       | 1.85         | 1.45       | 1.50         |
| TSEN15  | tRNA splicing endonuclease           | chr1q25              | tRNA splicing, via endonucleolytic cleav  | ---                                    | -1.07         | 1.01            | -1.06     | -1.10       | 1.06      | -1.02       | -1.09      | -1.12        | -1.41      | -1.24        | -1.16      | -1.18        |
| TSEN2   | tRNA splicing endonuclease           | chr3p25.2            | tRNA splicing, via endonucleolytic cleav  | ---                                    | 1.16          | 1.01            | 1.02      | 1.09        | -1.08     | 1.12        | -1.32      | -1.27        | -1.79      | -2.09        | -1.36      | -1.19        |
| TSEN34  | tRNA splicing endonuclease           | chr19q13.4           | tRNA-type intron splice site recognition  | ---                                    | 1.08          | 1.07            | 1.02      | 1.02        | -1.04     | -1.02       | 1.15       | 1.04         | 1.29       | 1.12         | 1.12       | 1.02         |
| TSFM    | Ts translation elongation factor     | chr12q14.1           | translation                               | ---                                    | 1.01          | 1.03            | 1.11      | -1.11       | 1.24      | 1.23        | 1.10       | 1.06         | 1.00       | -1.25        | -1.46      | -1.49        |
| TSFM    | Ts translation elongation factor     | chr12q14.1           | translation                               | ---                                    | 1.02          | -1.05           | 1.03      | 1.07        | -1.02     | 1.20        | -1.11      | 1.06         | -1.88      | -1.48        | -1.64      | -1.59        |
| TSHR    | thyroid stimulating hormone receptor | chr14q31             | signal transduction                       | GPCRDB_Other // GenMAPP /// Peptide, G | 1.18          | 1.07            | 1.23      | 2.20        | 1.06      | -1.08       | -1.47      | -1.11        | -2.24      | -2.43        | -4.81      | -2.10        |
| TSHZ1   | teashirt zinc finger homeobox 1      | chr18q22.3           | transcription, DNA-dependent              | ---                                    | 1.24          | 1.13            | 1.08      | -1.08       | -1.13     | -1.14       | -1.52      | -1.16        | -1.58      | -1.26        | -1.26      | -1.24        |
| TSHZ2   | teashirt zinc finger homeobox 2      | chr20q13.2           | transcription, DNA-dependent              | ---                                    | 1.20          | 1.24            | -1.00     | 1.07        | 1.03      | -1.02       | 1.04       | 1.10         | -1.82      | -1.50        | -2.38      | -1.95        |
| TSHZ2   | teashirt zinc finger homeobox 2      | chr20q13.2           | transcription, DNA-dependent              | ---                                    | -1.13         | -1.06           | 1.09      | -1.01       | -1.00     | 1.03        | 1.15       | 1.19         | -1.91      | -1.79        | -2.88      | -2.34        |
| TSHZ2   | teashirt zinc finger homeobox 2      | chr20q13.2           | transcription, DNA-dependent              | ---                                    | -1.06         | -1.28           | 1.66      | 1.44        | -1.12     | -1.12       | 1.43       | 1.01         | -1.69      | -1.13        | -1.83      | -1.94        |
| TSHZ2   | teashirt zinc finger homeobox 2      | chr20q13.2           | transcription, DNA-dependent              | ---                                    | 1.24          | 1.14            | 1.17      | 1.27        | 1.02      | -1.07       | -1.12      | -1.05        | -2.12      | -1.50        | -2.57      | -1.99        |
| TSHZ2   | teashirt zinc finger homeobox 2      | chr20q13.2           | transcription, DNA-dependent              | ---                                    | 1.21          | 1.19            | -1.13     | -1.12       | 1.22      | 1.31        | -1.16      | -1.32        | -1.56      | 1.11         | -1.58      | -1.34        |
| TSIX    | TSIX transcript, XIST antisense      | chrXq13.2            | 0                                         | ---                                    | -1.35         | -2.70           | -2.60     | -2.51       | 5.25      | 5.82        | 2.56       | 2.49         | -2.72      | -1.23        | 1.83       | 3.28         |
| TSKU    | tsukushi, small leucine rich repeat  | chr11q13.5           | regulation of gene expression             | ---                                    | -1.07         | -1.09           | 1.00      | 1.08        | 1.08      | 1.10        | 1.19       | 1.11         | 1.40       | 1.43         | 1.03       | 1.30         |
| TSLP    | thymic stromal lymphopoietin         | chr5q22.1            | 0                                         | ---                                    | 1.36          | 1.39            | -1.04     | -1.12       | 1.04      | -1.01       | 1.01       | -1.13        | -1.07      | 1.33         | 1.18       | 1.11         |
| TSN     | translin                             | chr2q21.1            | DNA recombination                         | ---                                    | 1.03          | 1.01            | 1.09      | 1.05        | 1.04      | -1.04       | 1.02       | -1.03        | -1.17      | -1.47        | 1.03       | -1.25        |
| TSN     | translin                             | chr2q21.1            | DNA recombination                         | ---                                    | 1.18          | 1.14            | -1.14     | 1.10        | -1.27     | -1.27       | -1.25      | -1.13        | -1.28      | -1.24        | -1.10      | -1.14        |
| TSN     | translin                             | chr2q21.1            | DNA recombination                         | ---                                    | -1.05         | -1.06           | 1.00      | -1.04       | -1.05     | 1.04        | -1.15      | -1.01        | -1.46      | -1.23        | -1.26      | -1.25        |
| TSNAX   | translin-associated factor X         | chr1q42.1            | multicellular organismal development      | ---                                    | -1.02         | 1.01            | 1.01      | 1.04        | -1.04     | -1.01       | -1.07      | -1.02        | -1.29      | -1.14        | -1.36      | -1.38        |
| TSPAN1  | tetraspanin 1                        | chr1p34.1            | 0                                         | ---                                    | -1.37         | -1.22           | 1.36      | 1.09        | 1.26      | 1.16        | 1.43       | 1.28         | 1.49       | 1.47         | 1.55       | 1.73         |
| TSPAN10 | tetraspanin 10                       | chr17q25.3           | 0                                         | ---                                    | 1.35          | 1.73            | 1.70      | 2.30        | -1.74     | 1.17        | -1.67      | 1.63         | 1.24       | 1.50         | -2.90      | -2.16        |
| TSPAN12 | tetraspanin 12                       | chr7q31.31           | angiogenesis                              | ---                                    | 1.24          | 1.12            | 1.02      | 1.09        | 1.06      | -1.07       | 1.04       | 1.06         | -1.46      | -1.26        | -1.65      | -1.90        |
| TSPAN12 | tetraspanin 12                       | chr7q31.31           | angiogenesis                              | ---                                    | 1.10          | 1.01            | -1.06     | 1.07        | 1.05      | -1.05       | -1.01      | 1.36         | -1.57      | -1.85        | -2.06      | -2.76        |
| TSPAN13 | tetraspanin 13                       | chr7p21.1            | 0                                         | ---                                    | 1.06          | 1.09            | -1.05     | -1.07       | -1.04     | 1.01        | -1.16      | -1.18        | -1.07      | 1.10         | 1.36       | 1.25         |
| TSPAN14 | tetraspanin 14                       | chr10q23.1           | 0                                         | ---                                    | -1.12         | -1.15           | 1.08      | 1.19        | 1.28      | 1.34        | -1.02      | -1.14        | -1.25      | -1.09        | -1.53      | -1.67        |
| TSPAN17 | tetraspanin 17                       | chr5q35.3            | protein ubiquitination                    | ---                                    | -1.23         | -1.49           | -1.06     | 1.23        | 1.18      | 1.06        | 1.25       | 1.30         | 1.18       | 1.08         | -1.07      | 1.06         |
| TSPAN18 | tetraspanin 18                       | chr11p11.2           | 0                                         | ---                                    | 1.19          | -1.06           | 1.20      | 1.19        | -1.14     | -1.32       | 1.10       | 1.12         | 1.15       | 1.02         | 1.10       | -1.04        |
| TSPAN2  | tetraspanin 2                        | chr1p13.2            | brain development                         | ---                                    | -1.09         | 1.24            | -1.44     | 1.03        | -1.03     | -1.23       | 1.37       | 1.20         | 1.17       | 1.41         | 1.47       | 1.47         |
| TSPAN2  | tetraspanin 2                        | chr1p13.2            | brain development                         | ---                                    | 1.59          | 2.88            | -1.33     | -1.20       | -1.60     | 4.98        | 1.83       | -2.44        | 1.07       | 1.21         | 1.71       | 1.01         |
| TSPAN2  | tetraspanin 2                        | chr1p13.2            | brain development                         | ---                                    | -1.27         | 1.31            | 1.11      | -1.92       | 1.19      | 1.99        | -1.44      | -1.29        | 1.03       | 1.43         | 3.59       | 2.65         |
| TSPAN3  | tetraspanin 3                        | chr15q24.3           | 0                                         | ---                                    | -1.58         | -1.66           | -2.51     | -1.37       | 2.86      | -1.48       | 2.35       | 1.22         | 4.32       | 5.38         | 1.26       | 1.42         |
| TSPAN3  | tetraspanin 3                        | chr15q24.3           | 0                                         | ---                                    | -1.04         | -1.06           | -1.07     | -1.03       | 1.05      | -1.07       | 1.08       | 1.11         | -1.23      | -1.21        | -1.14      | -1.21        |
| TSPAN4  | tetraspanin 4                        | chr11p15.5           | protein complex assembly                  | ---                                    | -1.09         | -1.08           | -1.04     | 1.03        | 1.12      | -1.01       | 1.17       | 1.03         | 1.42       | 1.11         | 1.30       | 1.20         |
| TSPAN5  | tetraspanin 5                        | chr4q23              | 0                                         | ---                                    | 1.11          | 1.52            | -1.39     | -1.34       | -1.55     | -1.13       | -1.65      | 1.40         | -1.06      | 1.05         | 1.11       | -1.28        |
| TSPAN5  | tetraspanin 5                        | chr4q23              | 0                                         | ---                                    | -1.22         | -1.36           | -1.10     | -1.64       | -1.00     | 1.24        | 1.03       | 1.18         | -1.08      | -1.49        | 2.05       | 1.81         |
| TSPAN5  | tetraspanin 5                        | chr4q23              | 0                                         | ---                                    | 1.31          | -1.33           | 1.73      | 2.35        | 1.11      | -1.26       | -1.99      | -1.63        | 2.23       | 2.06         | 1.26       | 1.84         |
| TSPAN6  | tetraspanin 6                        | chrXq22              | signal transduction                       | ---                                    | -1.01         | -1.04           | 1.01      | 1.03        | 1.01      | -1.00       | -1.01      | -1.02        | -1.03      | 1.04         | -1.39      | -1.22        |
| TSPAN6  | tetraspanin 6                        | chrXq22              | signal transduction                       | ---                                    | 1.01          | 1.14            | 1.07      | -1.01       | 1.08      | -1.15       | -1.14      | -1.17        | -1.93      | -1.66        | -2.06      | -2.39        |
| TSPAN8  | tetraspanin 8                        | chr12q14.1-q21.1     | protein glycosylation                     | ---                                    | -1.04         | 1.01            | -1.01     | -1.00       | -1.01     | -1.06       | -1.05      | -1.09        | -1.36      | -1.08        | -1.62      | -1.47        |
| TSPAN9  | tetraspanin 9                        | chr12p13.33-p13.33   | 0                                         | ---                                    | 1.00          | -1.07           | 1.06      | 1.03        | 1.45      | 1.27        | -1.05      | -1.31        | 1.96       | 1.99         | 1.53       | 1.85         |
| TSPQ    | translocator protein (18kDa)         | chr22q13.31          | protein targeting to mitochondrion        | ---                                    | -1.06         | -1.08           | 1.03      | -1.07       | 1.01      | -1.10       | 1.11       | 1.06         | 1.17       | 1.17         | 1.27       | 1.29         |
| TSPYL1  | TSPY-like 1                          | chr6q22.1            | nucleosome assembly                       | ---                                    | 1.10          | 1.02            | 1.02      | 1.00        | -1.08     | 1.16        | -1.42      | -1.25        | -1.39      | -1.23        | -1.49      | -1.70        |
| TSPYL1  | TSPY-like 1                          | chr6q22.1            | nucleosome assembly                       | ---                                    | 1.62          | 1.49            | 1.10      | 1.28        | -1.08     | 1.08        | 1.04       | -1.21        | -1.74      | -1.66        | -1.45      | -1.73        |
| TSPYL1  | TSPY-like 1                          | chr6q22.1            | nucleosome assembly                       | ---                                    | 1.45          | 1.41            | 1.15      | 1.31        | -1.18     | 1.05        | -1.11      | -1.20        | -1.35      | -1.24        | -1.41      | -1.56        |
| TSPYL2  | TSPY-like 2                          | chrXp11.2            | nucleosome assembly                       | ---                                    | -1.08         | -1.03           | 1.23      | 1.13        | 1.22      | 1.01        | 1.10       | 1.26         | 1.79       | 1.25         | 1.35       | 1.38         |
| TSPYL4  | TSPY-like 4                          | chr6q22.1            | nucleosome assembly                       | ---                                    | 1.21          | 1.10            | -1.13     | 1.21        | -1.05     | 1.17        | -1.07      | 1.15         | -1.56      | -1.26        | -2.37      | -2.19        |
| TSR1    | TSR1, 20S rRNA accumulation          | chr17p13.3           | ribosome biogenesis                       | ---                                    | -1.16         | -1.26           | -1.02     | 1.04        | -1.02     | -1.07       | 1.11       | 1.19         | 1.53       | 1.46         | 1.31       | 1.42         |
| TSR1    | TSR1, 20S rRNA accumulation          | chr17p13.3           | ribosome biogenesis                       | ---                                    | 1.10          | 1.13            | -1.07     | -1.18       | 1.07      | 1.47        | -1.21      | 1.03         | 1.04       | 1.11         | 1.55       | 1.38         |
| TSSC4   | tumor suppressing subunit            | chr11p15.5           | 0                                         | ---                                    | 1.01          | -1.04           | 1.04      | 1.16        | 1.14      | -1.10       | -1.00      | 1.00         | 1.51       | 1.31         | 1.32       | 1.44         |
| TSSK6   | testis-specific serine kinase        | chr19p13.11          | protein phosphorylation                   | ---                                    | 1.31          | 1.40            | -1.53     | 1.04        | 1.05      | -1.18       | -2.98      | -1.65        | 1.30       | 1.25         | -1.69      | -1.93        |
| TSTA3   | tissue specific transplanted         | chr8q24.3            | leukocyte cell-cell adhesion              | ---                                    | 1.01          | -1.02           | -1.02     | 1.00        | 1.07      | -1.04       | 1.19       | 1.11         | 1.24       | 1.03         | -1.22      | -1.24        |
| TSTA3   | tissue specific transplanted         | chr8q24.3            | leukocyte cell-cell adhesion              | ---                                    | 1.13          | 1.07            | 1.10      | -1.08       | -1.07     | -1.01       | 1.03       | 1.02         | 1.11       | -1.03        | -1.26      | -1.39        |
| TTBK2   | tau tubulin kinase 2                 | chr15q15.2           | protein phosphorylation                   | ---                                    | -1.13         | -1.05           | -1.16     | 1.34        | 1.02      | -1.17       | 1.14       | 1.06         | 2.04       | 1.76         | 2.75       | 2.39         |
| TTBK2   | tau tubulin kinase 2                 | chr15q15.2           | protein phosphorylation                   | ---                                    | -1.00         | 1.01            | 1.20      | 1.12        | 1.03      | -1.30       | 1.18       | -1.02        | 1.24       | 1.37         | 1.90       | 1.81         |

| ID           | Gene Title                       | Chromosomal Location | 1st Gene Ontology Biological Process          | Pathway | A2497 30 mins | A2497P' 30 mins | A2497 2 h | A2497P' 2 h | A2497 4 h | A2497P' 4 h | A2497 24 h | A2497P' 24 h | A2497 48 h | A2497P' 48 h | A2497 72 h | A2497P' 72 h |
|--------------|----------------------------------|----------------------|-----------------------------------------------|---------|---------------|-----------------|-----------|-------------|-----------|-------------|------------|--------------|------------|--------------|------------|--------------|
| TTBK2        | tau tubulin kinase 2             | chr15q15.2           | protein phosphorylation                       | ---     | 1.02          | 1.21            | -1.19     | 1.25        | -1.22     | -1.43       | 1.16       | -1.29        | 1.92       | 1.66         | 2.61       | 2.16         |
| TTC12        | tetratricopeptide repeat domain  | chr11p11.2           | 0                                             | ---     | 1.56          | 2.62            | -1.20     | 2.07        | -1.73     | 1.30        | 1.62       | -1.77        | -8.59      | -4.04        | -6.17      | -3.22        |
| TTC12        | tetratricopeptide repeat domain  | chr11q23.2           | 0                                             | ---     | -1.03         | -1.15           | -1.09     | 1.35        | -1.09     | 1.04        | 1.11       | 1.22         | -1.89      | -1.92        | -4.12      | -2.83        |
| TTC12        | tetratricopeptide repeat domain  | chr11q23.2           | 0                                             | ---     | 1.04          | -1.23           | -1.72     | -1.01       | 1.11      | 1.48        | 1.24       | 1.31         | -1.84      | -1.85        | -1.99      | -1.52        |
| TTC14        | tetratricopeptide repeat domain  | chr3q26.33           | 0                                             | ---     | 1.14          | 1.16            | 1.03      | 1.13        | -1.03     | 1.08        | -1.01      | 1.31         | -1.59      | -1.62        | -1.61      | -1.64        |
| TTC14        | tetratricopeptide repeat domain  | chr3q26.33           | 0                                             | ---     | 1.22          | 1.31            | 1.19      | 1.15        | -1.04     | 1.15        | 1.09       | -1.03        | -1.57      | -1.50        | -1.50      | -1.59        |
| TTC17        | tetratricopeptide repeat domain  | chr11p11.2           | regulation of apoptotic process               | ---     | 1.01          | -1.07           | 1.07      | 1.18        | 1.15      | 1.17        | 1.11       | 1.12         | -1.09      | -1.19        | 1.08       | 1.09         |
| TTC17        | tetratricopeptide repeat domain  | chr11p11.2           | 0                                             | ---     | -1.00         | 1.12            | 1.12      | 1.04        | 1.33      | 1.18        | 1.58       | 1.31         | -1.11      | -1.23        | 1.62       | 1.56         |
| TTC18        | tetratricopeptide repeat domain  | chr10q22.2           | 0                                             | ---     | 1.76          | 1.15            | -1.18     | 1.10        | -1.11     | -1.20       | -1.51      | 1.45         | -1.43      | -1.87        | -2.02      | -5.21        |
| TTC18        | tetratricopeptide repeat domain  | chr10q22.2           | 0                                             | ---     | 1.24          | 1.15            | 1.16      | 1.05        | -1.07     | 1.01        | 1.39       | -1.03        | -2.83      | -1.85        | -2.07      | -1.84        |
| TTC19        | tetratricopeptide repeat domain  | chr17p12             | cytokinesis                                   | ---     | 1.09          | 1.02            | -1.04     | -1.03       | 1.00      | 1.00        | 1.06       | 1.03         | -1.63      | -1.42        | -1.34      | -1.32        |
| TTC23        | tetratricopeptide repeat domain  | chr15q26.3           | 0                                             | ---     | -1.27         | -1.23           | 1.13      | 1.36        | -1.02     | -1.15       | 1.20       | 1.18         | 1.24       | 1.16         | 1.40       | 1.66         |
| TTC23L       | tetratricopeptide repeat domain  | chr5p13.2            | 0                                             | ---     | 1.16          | 1.39            | 1.26      | 1.80        | -1.99     | -1.17       | 1.17       | 1.23         | -1.58      | -1.38        | -3.44      | -2.06        |
| TTC26        | tetratricopeptide repeat domain  | chr7q34              | cell projection organization                  | ---     | 1.49          | 1.31            | -1.05     | -1.05       | 1.14      | -1.16       | 1.10       | 1.04         | 1.22       | 1.06         | -1.53      | -1.67        |
| TTC26        | tetratricopeptide repeat domain  | chr7q34              | cell projection organization                  | ---     | -1.04         | -1.12           | 1.03      | -1.15       | 1.02      | 1.09        | -1.09      | -1.08        | -1.35      | -1.22        | -2.04      | -2.26        |
| TTC26        | tetratricopeptide repeat domain  | chr7q34              | cell projection organization                  | ---     | 1.10          | -1.15           | -1.16     | -1.09       | 1.03      | 1.13        | -1.58      | -1.23        | -2.54      | -2.28        | -2.29      | -2.30        |
| TTC28        | tetratricopeptide repeat domain  | chr22q12.1           | cell cycle                                    | ---     | -1.09         | -1.03           | 1.12      | 1.09        | -1.07     | 1.14        | 1.05       | 1.14         | -1.45      | -1.18        | -1.43      | -1.64        |
| TTC28-AS1    | TTC28 antisense RNA 1            | chr22q12.1           | 0                                             | ---     | -1.15         | -1.09           | -1.02     | -2.00       | 1.54      | -1.10       | 1.41       | 1.06         | -1.68      | -1.85        | -4.23      | -2.55        |
| TTC28-AS1    | TTC28 antisense RNA 1            | chr22q12.1           | 0                                             | ---     | 1.03          | 1.08            | 1.04      | 1.07        | 1.05      | -1.05       | 1.34       | 1.19         | 1.32       | 1.18         | 1.29       | 1.22         |
| TTC3 /// TTC | tetratricopeptide repeat domain  | chr21q22.2 /// chrX  | ubiquitin-dependent protein catabolic process | ---     | -1.04         | -1.03           | -1.01     | 1.04        | -1.03     | -1.05       | 1.05       | 1.03         | 1.19       | 1.08         | -1.10      | 1.07         |
| TTC3 /// TTC | tetratricopeptide repeat domain  | chr21q22.2 /// chrX  | ubiquitin-dependent protein catabolic process | ---     | -1.02         | -1.05           | -1.05     | 1.01        | 1.00      | 1.07        | -1.04      | -1.13        | 1.03       | 1.03         | -1.19      | -1.01        |
| TTC30A       | tetratricopeptide repeat domain  | chr2q31.2            | cell projection organization                  | ---     | 1.04          | -1.01           | -1.05     | -1.04       | -1.02     | 1.00        | -1.01      | 1.13         | -4.13      | -2.85        | -2.49      | -2.73        |
| TTC30B       | tetratricopeptide repeat domain  | chr2q31.2            | cell projection organization                  | ---     | -1.15         | -1.07           | -1.03     | -1.47       | 1.36      | 1.37        | -1.11      | -1.36        | -2.21      | -1.54        | -2.36      | -2.23        |
| TTC30B       | tetratricopeptide repeat domain  | chr2q31.2            | cell projection organization                  | ---     | 1.07          | 1.04            | 1.09      | -1.33       | 1.06      | -1.04       | 1.23       | 1.12         | -2.20      | -1.45        | -1.77      | -1.94        |
| TTC31        | tetratricopeptide repeat domain  | chr2p13.1            | 0                                             | ---     | -1.06         | -1.18           | -1.02     | 1.11        | 1.07      | 1.10        | -1.01      | -1.08        | -1.95      | -1.52        | -1.92      | -1.63        |
| TTC33        | tetratricopeptide repeat domain  | chr5p13.1            | 0                                             | ---     | 1.29          | 1.23            | 1.02      | -1.03       | -1.08     | 1.05        | -1.16      | -1.17        | -1.55      | -1.34        | -1.21      | -1.49        |
| TTC37        | tetratricopeptide repeat domain  | chr5q15              | 0                                             | ---     | 1.09          | -1.13           | 1.15      | 1.16        | -1.09     | -1.03       | -1.04      | -1.02        | -1.67      | -1.30        | -1.90      | -2.11        |
| TTC37        | tetratricopeptide repeat domain  | chr5q15              | 0                                             | ---     | 1.29          | 1.17            | 1.15      | -1.04       | -1.03     | -1.01       | -1.16      | -1.12        | -1.60      | -1.48        | -1.76      | -1.75        |
| TTC37        | tetratricopeptide repeat domain  | chr5q15              | 0                                             | ---     | 1.12          | 1.06            | 1.03      | 1.08        | -1.06     | 1.15        | -1.18      | 1.01         | -1.63      | -1.35        | -1.88      | -1.81        |
| TTC38        | tetratricopeptide repeat domain  | chr22q13             | 0                                             | ---     | -1.29         | -1.19           | -1.08     | 1.03        | -1.01     | -1.12       | 1.04       | 1.19         | -1.05      | -1.10        | -1.45      | -1.25        |
| TTC39B       | tetratricopeptide repeat domain  | chr9p22.3            | 0                                             | ---     | -1.63         | -1.04           | -1.06     | -1.30       | -1.32     | 1.17        | 1.32       | 1.84         | 1.24       | 1.60         | 1.16       | -1.20        |
| TTC39C       | tetratricopeptide repeat domain  | chr18q11.2           | 0                                             | ---     | 1.13          | -1.05           | 1.02      | -1.04       | -1.11     | -1.02       | 1.14       | 1.09         | -1.09      | 1.09         | 1.38       | 1.22         |
| TTC39C       | tetratricopeptide repeat domain  | chr18q11.2           | 0                                             | ---     | 1.01          | 1.11            | -1.00     | 1.06        | -1.00     | 1.01        | -1.15      | -1.07        | -2.05      | -1.64        | -1.92      | -1.96        |
| TTC39C       | tetratricopeptide repeat domain  | chr18q11.2           | 0                                             | ---     | 1.05          | -1.01           | -1.01     | 1.15        | 1.06      | -1.00       | 1.09       | 1.14         | 1.03       | -1.04        | 1.34       | 1.35         |
| TTC4         | tetratricopeptide repeat domain  | chr1p32.3            | 0                                             | ---     | 1.07          | -1.04           | 1.07      | 1.06        | -1.50     | -1.26       | 1.09       | 1.24         | 1.07       | 1.60         | 1.48       | 1.48         |
| TTC40        | tetratricopeptide repeat domain  | chr10q26.3           | 0                                             | ---     | 2.30          | 2.37            | 2.59      | 2.41        | -2.96     | -2.19       | 1.59       | 1.48         | 1.79       | 1.46         | -1.01      | 1.17         |
| TTC5         | tetratricopeptide repeat domain  | chr14q11.2           | DNA repair                                    | ---     | 1.11          | 1.09            | -1.16     | -1.47       | 1.07      | -1.04       | -1.09      | 1.00         | -1.38      | -1.49        | -1.22      | -1.74        |
| TTC5         | tetratricopeptide repeat domain  | chr14q11.2           | DNA repair                                    | ---     | 1.37          | 2.43            | 1.60      | 2.27        | 1.04      | 1.02        | 1.89       | 2.01         | -1.70      | -1.35        | -2.51      | -2.23        |
| TTC5         | tetratricopeptide repeat domain  | chr14q11.2           | DNA repair                                    | ---     | 1.20          | 1.12            | -1.10     | -1.18       | -1.77     | -1.23       | -1.83      | -1.27        | -2.30      | -1.83        | -3.36      | -3.64        |
| TTC7A        | tetratricopeptide repeat domain  | chr2p21              | cellular iron ion homeostasis                 | ---     | -1.20         | -1.34           | -1.02     | 1.03        | 1.07      | 1.19        | 1.02       | 1.06         | -1.15      | -1.09        | -1.39      | -1.20        |
| TTC7A        | tetratricopeptide repeat domain  | chr2p21              | cellular iron ion homeostasis                 | ---     | -1.01         | -1.04           | 1.13      | 1.28        | 1.02      | -1.09       | 1.31       | 1.12         | -1.09      | -1.15        | -1.30      | -1.36        |
| TTC7A        | tetratricopeptide repeat domain  | chr2p21              | cellular iron ion homeostasis                 | ---     | 1.06          | 1.24            | 1.06      | 1.03        | -1.16     | 1.09        | 1.50       | 1.15         | 1.22       | -1.01        | -1.39      | -1.35        |
| TTC8         | tetratricopeptide repeat domain  | chr14q31.3           | axon guidance                                 | ---     | 1.08          | -1.04           | 1.10      | 1.06        | 1.09      | 1.12        | -1.21      | 1.02         | -1.70      | -1.30        | -1.70      | -1.84        |
| TTC9         | tetratricopeptide repeat domain  | chr14q24.2           | 0                                             | ---     | -1.80         | -1.73           | -1.39     | -1.24       | -1.78     | -1.63       | -1.11      | 1.59         | -1.07      | -1.55        | -1.91      | -1.72        |
| TTC9B        | tetratricopeptide repeat domain  | chr19q13.2           | 0                                             | ---     | -1.13         | -1.03           | 1.24      | 1.43        | 1.07      | 1.09        | 1.28       | 1.21         | 1.14       | 1.01         | 2.14       | 2.47         |
| TTC9C        | tetratricopeptide repeat domain  | chr11q12.3           | 0                                             | ---     | 1.03          | 1.02            | 1.04      | -1.05       | 1.00      | -1.02       | 1.06       | -1.07        | 1.49       | 1.38         | 1.43       | 1.33         |
| TF2          | transcription termination factor | chr1p22              | transcription, DNA-dependent                  | ---     | 3.37          | 2.10            | -1.11     | 1.09        | 1.03      | -1.17       | -1.07      | -1.86        | 1.75       | 2.30         | 1.27       | -1.47        |
| TF2          | transcription termination factor | chr1p22              | transcription, DNA-dependent                  | ---     | -1.01         | -1.10           | -1.02     | 1.04        | -1.18     | -1.01       | -1.17      | -1.09        | -1.37      | -1.43        | -1.58      | -1.68        |
| TTI2         | TELO2 interacting protein        | chr8p12              | 0                                             | ---     | -1.10         | -1.06           | 1.06      | 1.01        | 1.08      | 1.02        | -1.10      | -1.14        | 1.05       | 1.08         | 1.29       | 1.38         |
| TTK          | TTK protein kinase               | chr6q13-q21          | protein phosphorylation                       | ---     | 1.09          | 1.04            | 1.06      | 1.03        | -1.09     | 1.04        | -1.20      | -1.05        | -1.13      | 1.01         | 1.24       | 1.20         |
| TTL          | tubulin tyrosine ligase          | chr2q13              | microtubule cytoskeleton organization         | ---     | -1.01         | -1.01           | 1.07      | -1.06       | -1.04     | -1.03       | 1.09       | 1.01         | -1.06      | -1.10        | -1.35      | -1.41        |
| TTL          | tubulin tyrosine ligase          | chr2q13              | microtubule cytoskeleton organization         | ---     | -1.02         | -1.04           | 1.03      | 1.08        | 1.06      | 1.00        | 1.13       | 1.11         | 1.17       | 1.00         | -1.26      | -1.19        |
| TTL11        | tubulin tyrosine ligase-like     | chr9q33.2            | cellular protein modification process         | ---     | 1.18          | 1.12            | 1.03      | 1.34        | 1.14      | 1.12        | 1.26       | 1.16         | -1.95      | -1.91        | -1.67      | -1.85        |
| TTL12        | tubulin tyrosine ligase-like     | chr22q13.31          | cellular protein modification process         | ---     | -1.12         | -1.07           | 1.05      | 1.07        | 1.10      | 1.02        | -1.06      | 1.01         | 1.06       | 1.09         | -1.22      | -1.17        |
| TTL13        | tubulin tyrosine ligase-like     | chr15q26.1           | cellular protein modification process         | ---     | -1.14         | 1.26            | -1.02     | -1.52       | 1.52      | -3.01       | -1.62      | -1.07        | 3.07       | 1.36         | 1.03       | 1.40         |
| TTL13        | tubulin tyrosine ligase-like     | chr3p25.3            | cellular protein modification process         | ---     | -1.02         | -1.23           | 1.29      | 1.49        | 1.34      | 1.47        | -1.82      | 1.33         | 1.41       | 1.03         | -1.18      | -3.07        |
| TTL5         | tubulin tyrosine ligase-like     | chr14q24.3           | transcription, DNA-dependent                  | ---     | 1.02          | -1.13           | -1.08     | -1.09       | 1.35      | 1.17        | -1.45      | -1.07        | -1.54      | -1.70        | -1.57      | -1.74        |
| TTL5         | tubulin tyrosine ligase-like     | chr14q24.3           | transcription, DNA-dependent                  | ---     | -1.04         | 1.05            | 1.03      | 1.05        | 1.10      | -1.00       | 1.06       | 1.14         | -1.47      | -1.26        | -1.47      | -1.33        |
| TTL6         | tubulin tyrosine ligase-like     | chr17q21.32          | microtubule bundle formation                  | ---     | -1.86         | -1.84           | -2.08     | -1.35       | -2.24     | -1.05       | 1.07       | 1.79         | 1.68       | 1.64         | 1.20       | 2.68         |
| TTL7         | tubulin tyrosine ligase-like     | chr1p31.1            | cellular protein modification process         | ---     | 1.04          | -1.05           | -1.00     | 1.17        | 1.15      | 1.41        | -1.42      | -1.06        | -2.06      | -1.74        | -2.69      | -2.00        |
| TTL7-TTI1 // | TTL7 intronic transcript 1       | ---                  | 0                                             | ---     | 1.80          | 2.55            | 5.87      | 2.84        | 2.48      | 1.91        | 2.34       | 1.31         | 33.05      | 25.60        | 3.08       | 3.82         |
| TTN          | titin                            | chr2q31              | in utero embryonic development                | ---     | -4.37         | -1.88           | 2.02      | 2.19        | -1.36     | 1.08        | 1.70       | -1.00        | 1.41       | 1.12         | 1.74       | 2.20         |
| TTN-AS1      | TTN antisense RNA 1              | ---                  | 0                                             | ---     | 1.43          | 1.36            | 1.30      | 1.32        | 1.08      | 1.52        | -1.01      | -1.29        | -2.54      | -2.29        | -3.54      | -2.08        |
| TPAL         | tocopherol (alpha) transfer      | chr20q13.12          | transport                                     | ---     | -1.01         | 1.00            | -1.03     | -1.02       | 1.02      | 1.04        | -1.29      | -1.15        | -1.88      | -1.78        | -1.93      | -1.76        |
| TPAL         | tocopherol (alpha) transfer      | chr20q13.12          | transport                                     | ---     | -1.14         | 1.04            | 1.23      | 1.03        | 1.24      | 1.05        | 1.07       | -1.05        | -2.68      | -1.67        | -2.76      | -2.99        |
| TTR          | transthyretin                    | chr18q12.1           | retinoid metabolic process                    | ---     | 1.51          | 11.40           | 1.18      | 2.51        | -2.58     | -1.95       | -1.77      | -1.17        | 1.96       | 4.28         | 1.12       | -2.77        |

| ID      | Gene Title                              | Chromosomal Location | 1st Gene Ontology Biological Process                                 | Pathway                      | A2497 30 mins | A2497P' 30 mins | A2497 2 h | A2497P' 2 h | A2497 4 h | A2497P' 4 h | A2497 24 h | A2497P' 24 h | A2497 48 h | A2497P' 48 h | A2497 72 h | A2497P' 72 h |
|---------|-----------------------------------------|----------------------|----------------------------------------------------------------------|------------------------------|---------------|-----------------|-----------|-------------|-----------|-------------|------------|--------------|------------|--------------|------------|--------------|
| TTYH3   | tweety homolog 3 (Drosophila)           | chr7p22              | transport                                                            | ---                          | 1.05          | -1.01           | 1.17      | -1.06       | 1.69      | 1.65        | 1.10       | -1.01        | 1.28       | 1.56         | -1.04      | 1.31         |
| TUB     | tubby homolog (mouse)                   | chr1p15.5            | phagocytosis                                                         | ---                          | -1.07         | -1.15           | 1.09      | 1.07        | 1.06      | -1.04       | 1.00       | -1.07        | -1.26      | -1.25        | -1.37      | -1.20        |
| TUBA1A  | tubulin, alpha 1a                       | chr12q13.12          | G2                                                                   | ---                          | -1.21         | -1.09           | -1.00     | -1.04       | -1.05     | -1.14       | -1.10      | -1.03        | -1.28      | -1.04        | -2.35      | -1.72        |
| TUBA1B  | tubulin, alpha 1b                       | chr12q13.12          | microtubule cytoskeleton organization                                | ---                          | -1.05         | -1.00           | -1.03     | -1.01       | 1.03      | -1.06       | 1.13       | 1.06         | 1.53       | 1.16         | 1.14       | 1.14         |
| TUBA1B  | tubulin, alpha 1b                       | chr12q13.12          | microtubule cytoskeleton organization                                | ---                          | -1.04         | 1.03            | -1.07     | -1.03       | 1.00      | -1.11       | 1.16       | 1.08         | 1.53       | 1.12         | 1.13       | 1.18         |
| TUBA1B  | tubulin, alpha 1b                       | chr12q13.12          | microtubule cytoskeleton organization                                | ---                          | -1.03         | 1.02            | -1.02     | -1.03       | 1.02      | -1.06       | 1.24       | 1.12         | 1.60       | 1.17         | 1.15       | 1.18         |
| TUBA1B  | tubulin, alpha 1b                       | chr12q13.12          | G2                                                                   | ---                          | -1.07         | -1.03           | -1.02     | 1.02        | 1.04      | -1.03       | 1.14       | -1.01        | 1.50       | 1.13         | 1.13       | 1.10         |
| TUBA1C  | tubulin, alpha 1c                       | chr12q13.12          | microtubule cytoskeleton organization                                | ---                          | -1.07         | -1.04           | -1.08     | -1.08       | 1.03      | -1.07       | 1.13       | 1.07         | 1.52       | 1.20         | 1.18       | 1.21         |
| TUBA1C  | tubulin, alpha 1c                       | chr12q13.12          | microtubule cytoskeleton organization                                | ---                          | -1.07         | -1.02           | -1.03     | -1.04       | -1.02     | -1.10       | 1.13       | 1.09         | 1.45       | 1.26         | 1.11       | 1.16         |
| TUBA3FP | tubulin, alpha 3f, pseudogene           | chr22q11.21          | 0                                                                    | ---                          | 2.60          | 1.91            | 1.05      | -2.26       | 1.72      | 1.22        | -1.05      | -1.17        | -1.64      | -2.11        | -3.68      | -2.07        |
| TUBA4A  | tubulin, alpha 4a                       | chr2q35              | G2                                                                   | ---                          | -1.12         | -1.09           | -1.04     | 1.02        | -1.04     | -1.09       | 1.10       | 1.04         | 1.48       | 1.39         | 1.05       | 1.16         |
| TUBB    | tubulin, beta class I                   | chr6p21.33           | G2                                                                   | ---                          | -1.21         | -1.13           | -1.02     | -1.00       | 1.05      | -1.05       | 1.25       | 1.10         | 1.74       | 1.37         | 1.19       | 1.28         |
| TUBB    | tubulin, beta class I                   | chr6p21.33           | G2                                                                   | ---                          | -1.13         | -1.05           | 1.01      | 1.02        | 1.02      | -1.09       | 1.18       | 1.06         | 1.65       | 1.28         | 1.14       | 1.23         |
| TUBB1   | tubulin, beta 1 class V1                | chr20q13.32          | GTP catabolic process                                                | ---                          | -1.05         | -1.08           | 1.07      | 1.14        | 1.10      | -1.22       | -1.31      | -1.09        | -1.90      | -1.52        | -3.55      | -2.98        |
| TUBB2A  | tubulin, beta 2A class IIa              | chr6p25              | GTP catabolic process                                                | ---                          | -1.01         | 1.05            | -1.12     | 1.05        | -1.00     | -1.06       | -1.11      | -1.03        | 3.12       | 2.24         | 2.38       | 2.54         |
| TUBB2A  | tubulin, beta 2A class IIa              | chr6p25              | neuron migration                                                     | ---                          | -1.22         | 1.05            | -1.04     | -1.10       | 1.02      | 1.01        | -1.05      | -1.07        | 1.17       | 1.32         | 1.34       | 1.42         |
| TUBB2B  | tubulin, beta 2B class IIb              | chr6p25              | neuron migration                                                     | ---                          | 1.43          | -1.12           | -1.11     | -1.66       | -1.34     | 1.14        | 1.12       | 1.25         | 1.01       | -1.04        | 1.57       | 2.36         |
| TUBB3   | tubulin, beta 3 class III               | chr16q24.3           | GTP catabolic process                                                | Circadian_Eercise // GenMAPP | -1.07         | -1.02           | -1.02     | -1.03       | 1.00      | -1.07       | -1.08      | -1.04        | 1.51       | 1.25         | 1.17       | 1.16         |
| TUBB3   | tubulin, beta 3 class III               | chr16q24.3           | GTP catabolic process                                                | Circadian_Eercise // GenMAPP | -1.02         | -1.01           | 1.00      | 1.03        | -1.03     | -1.02       | 1.01       | -1.01        | 1.50       | 1.25         | 1.09       | 1.13         |
| TUBB4A  | tubulin, beta 4A class IVa              | chr19p13.3           | G2                                                                   | ---                          | -1.16         | -1.13           | -1.14     | 1.32        | 1.07      | -1.15       | -1.09      | -1.08        | 1.49       | 2.19         | 1.16       | 1.50         |
| TUBB4B  | tubulin, beta 4B class IVb              | chr9q34              | G2                                                                   | ---                          | -1.06         | -1.06           | -1.02     | -1.00       | 1.01      | -1.05       | 1.13       | 1.07         | 1.58       | 1.25         | 1.13       | 1.19         |
| TUBB4B  | tubulin, beta 4B class IVb              | chr9q34              | G2                                                                   | ---                          | -1.09         | -1.03           | -1.08     | -1.02       | -1.01     | -1.11       | 1.13       | 1.03         | 1.55       | 1.22         | 1.11       | 1.19         |
| TUBB6   | tubulin, beta 6 class V                 | chr18p11.21          | GTP catabolic process                                                | ---                          | 1.02          | 1.04            | -1.02     | -1.01       | -1.04     | -1.07       | 1.04       | 1.08         | 1.44       | 1.30         | 1.15       | 1.32         |
| TUBD1   | tubulin, delta 1                        | chr17q23.1           | GTP catabolic process                                                | ---                          | 1.01          | -1.08           | -1.02     | -1.11       | 1.05      | -1.01       | -1.31      | -1.05        | 1.01       | -1.10        | 1.25       | 1.41         |
| TUBD1   | tubulin, delta 1                        | chr17q23.1           | GTP catabolic process                                                | ---                          | -1.13         | 1.11            | 1.29      | 1.13        | -1.29     | -1.05       | -1.80      | -1.45        | -2.15      | -1.39        | -1.24      | -1.10        |
| TUBG1   | tubulin, gamma 1                        | chr17q21             | G2                                                                   | ---                          | -1.06         | -1.08           | -1.01     | 1.10        | 1.05      | -1.11       | 1.16       | 1.12         | 1.83       | 1.45         | 1.22       | 1.45         |
| TUBG2   | tubulin, gamma 2                        | chr17q21             | G2                                                                   | ---                          | 1.05          | -1.03           | -1.02     | 1.34        | 1.10      | 1.01        | 1.38       | 1.12         | 2.19       | 2.06         | 1.00       | 1.14         |
| TUBGCP2 | tubulin, gamma complex as               | chr10q26.3           | G2                                                                   | ---                          | 1.00          | -1.05           | -1.01     | 1.02        | -1.11     | 1.01        | -1.03      | -1.02        | 1.01       | -1.06        | -1.30      | -1.22        |
| TUBGCP3 | tubulin, gamma complex as               | chr13q34             | G2                                                                   | ---                          | 1.13          | 1.10            | -1.06     | -1.09       | -1.55     | -1.35       | -1.31      | -1.21        | -2.24      | -2.38        | -1.66      | -2.40        |
| TUBGCP3 | tubulin, gamma complex as               | chr13q34             | G2                                                                   | ---                          | 1.00          | -1.01           | 1.02      | -1.00       | 1.01      | 1.06        | 1.16       | 1.04         | 1.88       | 1.81         | 1.73       | 2.03         |
| TUBGCP3 | tubulin, gamma complex as               | chr13q34             | G2                                                                   | ---                          | 1.08          | 1.01            | 1.04      | 1.12        | -1.06     | -1.09       | 1.17       | 1.07         | 1.86       | 2.06         | 1.76       | 1.88         |
| TUBGCP5 | tubulin, gamma complex as               | chr15q11.2           | G2                                                                   | ---                          | 1.04          | -1.03           | -1.02     | -1.02       | 1.01      | 1.25        | -1.13      | -1.07        | -1.62      | 1.05         | -1.17      | -1.09        |
| TUBGCP5 | tubulin, gamma complex as               | chr15q11.2           | G2                                                                   | ---                          | -1.07         | -1.10           | 1.02      | 1.00        | -1.01     | 1.01        | -1.08      | -1.10        | -1.49      | -1.21        | -1.16      | -1.09        |
| TUBGCP6 | tubulin, gamma complex as               | chr22q13.31-q13.33   | G2                                                                   | ---                          | 1.29          | 1.44            | -1.86     | -1.63       | -1.09     | -1.14       | 1.21       | 1.26         | 1.16       | -1.48        | 1.19       | -1.05        |
| TUFT1   | tuftelin 1                              | chr1q21              | bone mineralization                                                  | ---                          | 1.06          | 1.10            | -1.03     | 1.01        | -1.04     | 1.01        | -1.06      | 1.04         | 1.00       | 1.07         | 1.54       | 1.31         |
| TUG1    | taurine upregulated 1 (non-coding RNA)  | chr22q12.2           | 0                                                                    | ---                          | 1.01          | 1.03            | -1.03     | 1.07        | -1.03     | 1.02        | -1.11      | -1.03        | -1.31      | -1.23        | -1.18      | -1.14        |
| TUG1    | taurine upregulated 1 (non-coding RNA)  | chr22q12.2           | 0                                                                    | ---                          | -1.05         | -1.08           | 1.02      | -1.12       | 1.01      | 1.04        | -1.20      | -1.02        | -1.98      | -1.41        | -1.36      | -1.26        |
| TUG1    | taurine upregulated 1 (non-coding RNA)  | chr22q12.2           | 0                                                                    | ---                          | -1.03         | 1.08            | 1.10      | 1.05        | -1.04     | 1.05        | -1.30      | -1.12        | -2.06      | -1.88        | -2.08      | -1.96        |
| TUG1    | taurine upregulated 1 (non-coding RNA)  | chr22q12.2           | 0                                                                    | ---                          | -1.03         | 1.01            | 1.04      | -1.12       | -1.03     | 1.02        | -1.20      | -1.12        | -1.68      | -1.53        | -1.39      | -1.36        |
| TULP2   | tubby like protein 2                    | chr19q13.1           | visual perception                                                    | ---                          | -1.62         | -1.88           | 1.14      | 2.56        | 1.93      | 1.45        | -2.43      | -1.95        | 4.03       | 1.24         | -1.46      | 5.34         |
| TULP4   | tubby like protein 4                    | chr6q25-q26          | regulation of transcription, DNA-dependent                           | ---                          | 1.23          | 1.26            | 1.02      | -1.22       | 1.01      | 1.08        | -1.18      | -1.07        | -1.17      | -1.17        | -1.07      | -1.38        |
| TUSC1   | tumor suppressor candidate 1            | chr9p21.2            | 0                                                                    | ---                          | 1.10          | 1.06            | -1.06     | 1.05        | -1.01     | 1.14        | -1.11      | -1.02        | -2.16      | -1.84        | -1.61      | -1.76        |
| TUSC3   | tumor suppressor candidate 3            | chr8p22              | protein N-linked glycosylation                                       | ---                          | 1.18          | 1.02            | -1.00     | 1.06        | -1.09     | -1.10       | -1.17      | -1.12        | -1.29      | -1.09        | -1.53      | -1.70        |
| TUSC3   | tumor suppressor candidate 3            | chr8p22              | protein N-linked glycosylation                                       | ---                          | 1.19          | 1.13            | 1.08      | 1.02        | 1.06      | -1.04       | -1.22      | -1.03        | -1.42      | -1.18        | -1.40      | -1.33        |
| TUT1    | terminal uridylyl transferase           | chr11q12.2           | mRNA polyadenylation                                                 | ---                          | -1.17         | -1.04           | -1.02     | 1.01        | 1.13      | 1.04        | 1.09       | 1.02         | 1.46       | 1.25         | 1.63       | 1.68         |
| TVP23B  | trans-golgi network vesicle protein 23B | chr17p11.2           | 0                                                                    | ---                          | -1.02         | -1.01           | -1.04     | -1.09       | -1.13     | -1.03       | -1.12      | -1.07        | 1.32       | 1.49         | 1.36       | 1.27         |
| TVP23C  | trans-golgi network vesicle protein 23C | chr17p12             | 0                                                                    | ---                          | 1.03          | -1.12           | -1.00     | -1.00       | 1.20      | 1.12        | 2.49       | 2.67         | -1.06      | -1.44        | -1.50      | -1.52        |
| TWF1    | twinstin actin-binding protein 1        | chr12q12             | negative regulation of actin filament polymerization                 | ---                          | 1.04          | -1.01           | -1.05     | -1.01       | 1.09      | 1.01        | 1.10       | -1.01        | -1.10      | 1.05         | 1.95       | 1.87         |
| TWF1    | twinstin actin-binding protein 1        | chr12q12             | negative regulation of actin filament polymerization                 | ---                          | 1.05          | 1.06            | 1.04      | 1.01        | -1.01     | 1.06        | -1.32      | -1.07        | -1.05      | 1.27         | 1.67       | 1.43         |
| TWF2    | twinstin actin-binding protein 2        | chr3p21.1            | positive regulation of lamellipodium assembly                        | ---                          | -1.11         | -1.10           | -1.02     | -1.12       | 1.18      | 1.39        | -1.11      | -1.05        | 1.31       | 1.39         | 1.16       | 1.17         |
| TWISTNB | TWIST neighbor                          | chr7p21.1            | transcription, DNA-dependent                                         | ---                          | 1.10          | 1.03            | -1.04     | 1.04        | -1.04     | 1.05        | -1.17      | -1.24        | 1.17       | 1.06         | 1.35       | 1.14         |
| TWISTNB | TWIST neighbor                          | chr7p21.1            | transcription, DNA-dependent                                         | ---                          | -1.37         | 1.05            | 1.40      | 1.42        | -1.04     | -1.32       | 1.40       | -1.11        | 1.46       | 1.64         | 1.18       | -1.09        |
| TWSG1   | twisted gastrulation homolog 1          | chr18p11.3           | ossification                                                         | ---                          | 1.08          | 1.11            | 1.04      | -1.18       | -1.18     | -1.06       | -1.24      | -1.08        | -1.25      | -1.05        | -1.38      | -1.73        |
| TXLNG   | taxilin gamma                           | chrXp22.2            | transcription, DNA-dependent                                         | ---                          | 1.15          | 1.11            | 1.19      | 1.03        | 1.00      | 1.04        | -1.17      | -1.13        | -1.58      | -1.53        | 1.08       | -1.03        |
| TXLNG   | taxilin gamma                           | chrXp22.2            | transcription, DNA-dependent                                         | ---                          | -1.04         | 1.06            | 1.06      | 1.01        | 1.02      | -1.03       | -1.18      | -1.04        | -1.22      | -1.30        | 1.02       | -1.03        |
| TXLNG   | taxilin gamma                           | chrXp22.2            | transcription, DNA-dependent                                         | ---                          | -1.01         | 1.13            | 1.04      | 1.02        | 1.30      | 1.04        | 1.27       | -1.07        | -1.31      | -1.65        | 1.80       | 1.53         |
| TXLNG2P | taxilin gamma 2, pseudogene             | chrYq11.222          | 0                                                                    | ---                          | 1.96          | -1.06           | -2.17     | -1.91       | -2.16     | 1.47        | -2.26      | 1.21         | 1.47       | 1.31         | 1.94       | 2.40         |
| TXN     | thioredoxin                             | chr9q31              | negative regulation of transcription from RNA polymerase II promoter | ---                          | -1.02         | 1.04            | -1.05     | -1.03       | -1.07     | -1.05       | 1.03       | -1.03        | 1.18       | 1.11         | -1.00      | -1.03        |
| TXNDC11 | thioredoxin domain containing 11        | chr16p13.13          | cell redox homeostasis                                               | ---                          | -1.06         | -1.07           | 1.00      | -1.04       | 1.13      | 1.03        | 1.06       | -1.09        | 1.15       | -1.01        | 1.32       | 1.27         |
| TXNDC12 | thioredoxin domain containing 12        | chr1p32.3            | cell redox homeostasis                                               | ---                          | -1.05         | -1.01           | -1.03     | 1.02        | 1.05      | 1.06        | -1.02      | -1.06        | 1.15       | 1.16         | 1.11       | 1.16         |
| TXNDC15 | thioredoxin domain containing 15        | chr5q31.1            | cell redox homeostasis                                               | ---                          | 1.10          | -1.08           | -1.01     | 1.15        | 1.03      | 1.10        | -1.05      | 1.09         | -1.09      | -1.06        | -1.46      | -1.21        |
| TXNDC15 | thioredoxin domain containing 15        | chr5q31.1            | cell redox homeostasis                                               | ---                          | -1.10         | -1.09           | 1.03      | -1.03       | 1.11      | -1.02       | 1.00       | 1.04         | 1.23       | 1.06         | 1.57       | 1.49         |
| TXNDC16 | thioredoxin domain containing 16        | chr14q22.1           | cell redox homeostasis                                               | ---                          | 1.07          | 1.12            | -1.03     | 1.07        | -1.29     | 1.02        | -1.39      | -1.17        | -1.59      | -1.22        | -1.46      | -1.54        |
| TXNDC17 | thioredoxin domain containing 17        | chr17p13.1           | tumor necrosis factor-mediated signaling pathway                     | ---                          | 1.02          | -1.02           | 1.03      | 1.07        | -1.03     | -1.07       | -1.13      | -1.09        | -1.01      | 1.03         | -1.30      | -1.13        |
| TXNDC17 | thioredoxin domain containing 17        | chr17p13.1           | tumor necrosis factor-mediated signaling pathway                     | ---                          | -1.13         | -1.10           | -1.02     | -1.07       | 1.01      | -1.03       | 1.06       | 1.02         | 1.36       | 1.41         | 1.09       | 1.21         |
| TXNDC9  | thioredoxin domain containing 9         | chr2q11.2            | cell redox homeostasis                                               | ---                          | -1.08         | -1.04           | 1.02      | -1.05       | -1.07     | 1.12        | 1.21       | 1.35         | 1.39       | 1.23         | 1.65       | 1.30         |

| ID        | Gene Title                   | Chromosomal Location | 1st Gene Ontology Biological Process       | Pathway                             | A2497 30 mins | A2497P' 30 mins | A2497 2 h | A2497P' 2 h | A2497 4 h | A2497P' 4 h | A2497 24 h | A2497P' 24 h | A2497 48 h | A2497P' 48 h | A2497 72 h | A2497P' 72 h |
|-----------|------------------------------|----------------------|--------------------------------------------|-------------------------------------|---------------|-----------------|-----------|-------------|-----------|-------------|------------|--------------|------------|--------------|------------|--------------|
| TXNDC9    | thioredoxin domain contain   | chr2q11.2            | cell redox homeostasis                     | ---                                 | 1.00          | 1.05            | -1.09     | -1.10       | -1.04     | 1.00        | -1.20      | -1.02        | -1.27      | -1.23        | -1.27      | -1.32        |
| TXNDC9    | thioredoxin domain contain   | chr2q11.2            | cell redox homeostasis                     | ---                                 | -1.07         | 1.03            | -1.04     | -1.04       | -1.12     | -1.03       | -1.29      | -1.13        | -1.38      | -1.24        | -1.20      | -1.31        |
| TXNLI     | thioredoxin-like 1           | chr18p11.32          | glycerol ether metabolic process           | ---                                 | -1.06         | -1.01           | -1.03     | 1.05        | -1.00     | -1.07       | 1.11       | 1.07         | 1.01       | -1.08        | -1.08      | -1.15        |
| TXNLI     | thioredoxin-like 1           | chr18p11.32          | glycerol ether metabolic process           | ---                                 | 1.10          | -1.11           | -1.06     | 1.25        | 1.31      | 1.93        | -1.67      | -1.24        | -2.07      | -2.89        | -2.93      | -3.50        |
| TXNLI4B   | thioredoxin-like 4B          | chr16q22.2           | mRNA processing                            | ---                                 | -1.04         | -1.18           | -1.02     | 1.02        | 1.05      | 1.02        | -1.14      | -1.10        | 1.11       | 1.01         | 1.33       | 1.21         |
| TXNRD1    | thioredoxin reductase 1      | chr12q23-q24.1       | mesoderm formation                         | ---                                 | 1.02          | 1.10            | -1.03     | -1.09       | -1.02     | -1.01       | -1.01      | -1.00        | -1.21      | -1.14        | -1.05      | -1.22        |
| TXNRD3    | thioredoxin reductase 3      | chr3q21.3            | multicellular organismal development       | ---                                 | -1.10         | -1.13           | 1.15      | 1.20        | -1.13     | -1.15       | -1.02      | -1.13        | -1.28      | -1.38        | -1.03      | -1.01        |
| TYMS      | thymidylate synthetase       | chr18p11.32          | G1                                         | ---                                 | -1.09         | -1.08           | -1.05     | -1.00       | -1.05     | -1.04       | 1.04       | 1.04         | 1.13       | 1.05         | -1.16      | -1.08        |
| TYMS      | thymidylate synthetase       | chr18p11.32          | G1                                         | ---                                 | -1.01         | -1.01           | 1.03      | -1.01       | 1.00      | -1.11       | 1.06       | -1.09        | 1.04       | 1.02         | -1.23      | -1.11        |
| TYR       | tyrosinase                   | chr11q14-q21         | melanin biosynthetic process from tyrosi   | ---                                 | 3.48          | -1.10           | 1.98      | 1.05        | -1.33     | -1.34       | -8.68      | -2.49        | 1.64       | -1.00        | -4.32      | -3.96        |
| TYSDN1    | trypsin domain containing    | chr10q22.1           | proteolysis                                | ---                                 | -1.20         | -1.20           | -1.03     | 1.02        | 1.36      | 1.05        | -1.01      | 1.01         | -1.53      | -1.36        | 1.16       | 1.13         |
| TYW3      | tRNA-yW synthesizing pro     | chr1p31.1            | tRNA processing                            | ---                                 | -1.03         | -1.02           | 1.02      | 1.04        | 1.03      | -1.04       | 1.23       | 1.17         | 1.30       | 1.18         | 1.24       | 1.26         |
| TYW5      | tRNA-yW synthesizing pro     | chr2q33.1            | tRNA processing                            | ---                                 | -1.39         | -1.31           | -1.04     | -1.05       | 1.19      | -1.15       | 1.28       | 1.40         | 1.95       | -1.10        | 2.59       | 2.26         |
| TYW5      | tRNA-yW synthesizing pro     | chr2q33.1            | tRNA processing                            | ---                                 | -1.03         | -1.03           | -1.04     | -1.51       | -1.10     | 1.06        | -1.60      | -1.38        | -1.40      | -1.29        | 1.01       | 1.03         |
| TYW5      | tRNA-yW synthesizing pro     | chr2q33.1            | tRNA processing                            | ---                                 | 1.08          | 1.33            | -1.15     | -1.11       | -1.18     | -1.16       | -1.13      | -1.21        | 1.10       | -1.27        | 1.64       | 1.52         |
| U2AF1     | U2 small nuclear RNA aux     | chr21q22.3           | mRNA splicing, via spliceosome             | mRNA_processing_Reactome // GenMAPP | 1.04          | 1.16            | 1.13      | -1.43       | 1.49      | 1.30        | 1.04       | -1.15        | -1.57      | -1.44        | -1.27      | -1.66        |
| U2AF1L4   | U2 small nuclear RNA aux     | chr19q13.12          | mRNA processing                            | ---                                 | -1.00         | -1.06           | 1.10      | 1.16        | 1.07      | -1.13       | 1.13       | -1.02        | 1.76       | 1.19         | 1.46       | 1.36         |
| U2AF2     | U2 small nuclear RNA aux     | chr19q13.42          | mRNA splicing, via spliceosome             | mRNA_processing_Reactome // GenMAPP | -1.08         | 1.00            | -1.05     | -1.14       | -1.08     | 1.02        | -1.07      | 1.02         | -1.27      | -1.31        | -1.14      | -1.33        |
| U2SURP    | U2 snRNP-associated SUR      | chr3q23              | RNA processing                             | ---                                 | -1.07         | -1.18           | -1.04     | -1.08       | 1.00      | 1.08        | -1.43      | -1.04        | -1.41      | -1.45        | -1.59      | -1.43        |
| U2SURP    | U2 snRNP-associated SUR      | chr3q23              | RNA processing                             | ---                                 | 1.23          | 1.57            | -1.21     | -1.43       | 1.42      | 1.56        | -1.35      | -1.53        | -1.39      | -1.48        | -1.89      | -1.99        |
| U2SURP    | U2 snRNP-associated SUR      | chr3q23              | RNA processing                             | ---                                 | 1.18          | 1.17            | 1.08      | 1.09        | -1.11     | 1.03        | -1.17      | -1.01        | -1.60      | -1.41        | -1.24      | -1.49        |
| U2SURP    | U2 snRNP-associated SUR      | chr3q23              | RNA processing                             | ---                                 | -1.01         | 1.04            | -1.02     | 1.03        | 1.00      | -1.03       | 1.00       | 1.03         | -1.24      | -1.32        | -1.04      | -1.07        |
| UACA      | uveal autoantigen with coil  | chr15q22-q24         | intrinsic apoptotic signaling pathway in r | ---                                 | 1.19          | -1.16           | 1.16      | -1.05       | -1.44     | -1.03       | -1.26      | -1.42        | -3.66      | -2.34        | -2.89      | -2.68        |
| UACA      | uveal autoantigen with coil  | chr15q22-q24         | intrinsic apoptotic signaling pathway in r | ---                                 | -1.21         | -1.10           | -1.02     | 1.16        | -1.36     | -1.02       | -1.29      | 1.13         | -1.40      | -1.20        | -2.09      | -1.90        |
| UAP1      | UDP-N-acetylglucosamine      | chr1q23.3            | UDP-N-acetylglucosamine metabolic pro      | ---                                 | -1.02         | 1.02            | 1.00      | 1.03        | -1.02     | -1.01       | 1.04       | 1.02         | 1.41       | 1.33         | 1.35       | 1.39         |
| UBA2      | ubiquitin-like modifier acti | chr19q12             | cellular protein modification process      | ---                                 | 1.02          | -1.03           | -1.02     | -1.03       | -1.15     | 1.05        | -1.11      | 1.08         | -1.20      | -1.11        | -1.02      | 1.15         |
| UBA3      | ubiquitin-like modifier acti | chr3p24.3-p13        | mitotic cell cycle                         | ---                                 | -1.01         | -1.02           | -1.01     | -1.01       | -1.12     | -1.07       | 1.04       | -1.11        | -1.21      | -1.15        | 1.05       | -1.08        |
| UBA5      | ubiquitin-like modifier acti | chr3q22.1            | response to endoplasmic reticulum stress   | ---                                 | 1.03          | 1.14            | 1.14      | 1.09        | -1.01     | 1.02        | 1.11       | -1.02        | -1.32      | -1.27        | -1.31      | -1.34        |
| UBA5      | ubiquitin-like modifier acti | chr3q22.1            | response to endoplasmic reticulum stress   | ---                                 | 1.01          | 1.05            | -1.02     | 1.13        | -1.12     | -1.05       | 1.01       | -1.01        | -1.16      | -1.17        | -1.49      | -1.47        |
| UBA5      | ubiquitin-like modifier acti | chr3q22.1            | response to endoplasmic reticulum stress   | ---                                 | -1.19         | -1.10           | 1.02      | 1.01        | -1.01     | -1.00       | 1.15       | 1.12         | 1.12       | 1.14         | 1.17       | 1.13         |
| UBA6      | ubiquitin-like modifier acti | chr4q13.2            | cellular protein modification process      | ---                                 | -1.25         | -1.22           | 1.23      | 1.25        | 1.42      | 1.27        | 1.51       | 1.18         | 1.54       | 1.63         | 2.03       | 1.65         |
| UBA6      | ubiquitin-like modifier acti | chr4q13.2            | cellular protein modification process      | ---                                 | 1.14          | 1.14            | -1.06     | -1.10       | -1.16     | -1.09       | -1.13      | -1.04        | 1.43       | 1.30         | 1.58       | 1.44         |
| UBA6      | ubiquitin-like modifier acti | chr4q13.2            | cellular protein modification process      | ---                                 | 1.43          | 1.42            | 1.13      | 1.01        | -1.08     | 1.03        | -1.03      | -1.52        | 2.19       | 1.91         | 1.59       | 1.60         |
| UBA6      | ubiquitin-like modifier acti | chr4q13.2            | cellular protein modification process      | ---                                 | 1.01          | 1.06            | -1.05     | -1.05       | -1.03     | 1.04        | -1.05      | -1.01        | 1.35       | 1.44         | 1.45       | 1.40         |
| UBAC1     | UBA domain containing 1      | chr9q34.3            | protein ubiquitination                     | ---                                 | -1.02         | 1.03            | 1.07      | -1.02       | 1.06      | -1.02       | -1.07      | -1.11        | -1.05      | -1.08        | -1.24      | -1.20        |
| UBAC2     | UBA domain containing 2      | chr13q32.3           | 0                                          | ---                                 | -1.04         | -1.07           | -1.03     | -1.04       | -1.02     | 1.01        | 1.08       | 1.07         | 1.14       | 1.17         | 1.13       | 1.25         |
| UBAC2-AS1 | UBAC2 antisense RNA 1        | chr13q32.3           | 0                                          | ---                                 | 1.62          | 1.38            | -1.17     | -1.32       | -1.49     | 1.01        | -1.08      | -1.13        | -3.51      | -2.49        | -3.57      | -4.82        |
| UBALD2    | UBA-like domain containi     | chr17q25.1           | 0                                          | ---                                 | 1.06          | -1.04           | 1.43      | 1.27        | 1.01      | -1.00       | 1.07       | 1.02         | 1.14       | 1.35         | 1.33       | 1.17         |
| UBALD2    | UBA-like domain containi     | chr17q25.1           | translation                                | ---                                 | -1.10         | -1.12           | -1.02     | -1.05       | 1.01      | -1.17       | 1.11       | 1.14         | 1.58       | 1.31         | 1.38       | 1.36         |
| UBAP1     | ubiquitin associated protein | chr9p13.3            | transport                                  | ---                                 | -1.03         | -1.06           | -1.00     | -1.02       | 1.07      | 1.07        | 1.11       | -1.09        | 1.59       | 1.44         | 1.82       | 1.47         |
| UBAP1     | ubiquitin associated protein | chr9p13.3            | transport                                  | ---                                 | -1.10         | -1.07           | -1.10     | -1.11       | -1.04     | -1.00       | 1.06       | 1.00         | 1.42       | 1.46         | 1.64       | 1.51         |
| UBAP2     | ubiquitin associated protein | chr9p13.3            | 0                                          | ---                                 | -1.10         | -1.00           | 1.00      | 1.03        | 1.02      | 1.11        | -1.34      | -1.06        | -1.20      | 1.06         | -1.07      | 1.10         |
| UBAP2L    | ubiquitin associated protein | chr1q21.3            | binding of sperm to zona pellucida         | ---                                 | 1.35          | 1.26            | -1.12     | -1.31       | -1.34     | -1.20       | -1.11      | 1.09         | -1.41      | -1.38        | -1.63      | -2.21        |
| UBAP2L    | ubiquitin associated protein | chr1q21.3            | binding of sperm to zona pellucida         | ---                                 | -1.11         | -1.18           | 1.02      | -1.04       | -1.10     | -1.12       | -1.07      | 1.07         | -1.67      | -2.03        | -1.45      | -1.47        |
| UBAP2L    | ubiquitin associated protein | chr1q21.3            | binding of sperm to zona pellucida         | ---                                 | -1.04         | -1.02           | -1.01     | 1.00        | 1.03      | -1.00       | 1.00       | -1.00        | 1.09       | -1.00        | -1.15      | -1.09        |
| UBASH3A   | ubiquitin associated and SH  | chr21q22.3           | regulation of cytokine production          | ---                                 | 3.62          | 3.63            | 1.59      | 2.26        | 1.24      | 1.12        | -1.10      | -1.26        | 5.89       | 6.06         | 2.18       | 1.40         |
| UBASH3B   | ubiquitin associated and SH  | chr11q24.1           | negative regulation of protein kinase acti | ---                                 | 2.74          | 1.90            | -1.74     | -4.64       | 1.41      | 1.78        | 1.23       | -5.20        | 1.23       | 1.13         | 3.10       | 7.91         |
| UBASH3B   | ubiquitin associated and SH  | chr11q24.1           | negative regulation of protein kinase acti | ---                                 | -2.59         | 1.56            | 1.18      | 1.09        | -1.35     | 1.25        | 1.37       | 1.26         | 2.00       | 1.76         | 4.88       | 2.75         |
| UBASH3B   | ubiquitin associated and SH  | chr11q24.1           | negative regulation of protein kinase acti | ---                                 | 1.10          | 1.30            | -2.23     | -1.22       | -1.01     | -1.02       | 1.17       | 1.02         | 1.14       | 1.08         | 2.03       | 1.70         |
| UBASH3B   | ubiquitin associated and SH  | chr11q24.1           | negative regulation of protein kinase acti | ---                                 | 2.40          | 2.12            | 1.07      | 1.02        | 1.13      | 1.11        | 1.44       | 1.11         | 1.79       | 1.15         | 1.35       | 1.18         |
| UBB       | ubiquitin B                  | chr17p12-p11.2       | cell cycle checkpoint                      | ---                                 | -1.07         | 1.03            | -1.03     | -1.03       | 1.11      | -1.02       | 1.21       | 1.07         | 1.33       | -1.04        | 1.12       | 1.04         |
| UBBP2     | ubiquitin B pseudogene 2     | ---                  | 0                                          | ---                                 | -1.40         | -1.02           | -1.30     | -1.20       | -1.51     | -1.14       | -1.25      | 1.03         | 1.10       | 1.14         | -1.70      | -1.63        |
| UBC       | ubiquitin C                  | chr12q24.3           | cell cycle checkpoint                      | DNA_replication_Reactome // GenMAPP | -1.02         | -1.01           | -1.10     | -1.03       | -1.07     | -1.07       | 1.00       | -1.06        | 1.27       | 1.29         | 1.23       | 1.30         |
| UBC       | ubiquitin C                  | chr12q24.3           | cell cycle checkpoint                      | DNA_replication_Reactome // GenMAPP | -1.05         | -1.03           | -1.06     | 1.00        | 1.05      | -1.01       | 1.04       | -1.04        | 1.52       | 1.35         | 1.31       | 1.36         |
| UBE2A     | ubiquitin-conjugating enzy   | chrXq24              | protein polyubiquitination                 | ---                                 | 1.03          | -1.04           | 1.07      | 1.07        | -1.02     | 1.00        | -1.01      | -1.01        | 1.18       | 1.16         | 1.29       | 1.28         |
| UBE2B     | ubiquitin-conjugating enzy   | chr5q31.1            | protein polyubiquitination                 | ---                                 | 1.30          | 1.21            | 1.12      | -1.08       | -1.01     | 1.08        | -1.36      | -1.24        | -1.71      | -1.73        | -1.49      | -1.83        |
| UBE2B     | ubiquitin-conjugating enzy   | chr5q31.1            | protein polyubiquitination                 | ---                                 | 1.24          | 1.03            | 1.09      | 1.01        | -1.17     | -1.09       | 1.15       | 1.01         | -1.14      | -1.51        | -1.60      | -2.09        |
| UBE2B     | ubiquitin-conjugating enzy   | chr5q31.1            | protein polyubiquitination                 | ---                                 | 1.19          | 1.15            | -1.07     | -1.14       | -1.19     | -1.03       | -1.39      | -1.13        | -1.73      | -1.75        | -1.61      | -1.89        |
| UBE2D2    | ubiquitin-conjugating enzy   | chr5q31.2            | protein polyubiquitination                 | ---                                 | -1.01         | 1.06            | 1.02      | -1.04       | 1.02      | 1.02        | -1.10      | -1.15        | -1.19      | -1.11        | -1.04      | -1.12        |
| UBE2D2    | ubiquitin-conjugating enzy   | chr5q31.2            | protein polyubiquitination                 | ---                                 | 1.02          | -1.03           | -1.09     | -1.07       | 1.08      | 1.05        | -1.20      | -1.10        | -1.80      | -1.77        | -1.77      | -1.88        |
| UBE2D2    | ubiquitin-conjugating enzy   | chr5q31.2            | protein polyubiquitination                 | ---                                 | 1.00          | -1.01           | -1.04     | 1.01        | -1.03     | -1.05       | -1.00      | 1.05         | 1.30       | 1.21         | 1.22       | 1.22         |
| UBE2D3    | ubiquitin-conjugating enzy   | chr4q24              | negative regulation of transcription from  | ---                                 | 1.10          | 1.19            | -1.14     | -1.10       | -1.04     | 1.01        | 1.11       | -1.02        | 1.52       | 1.36         | 1.86       | 1.64         |
| UBE2D3    | ubiquitin-conjugating enzy   | chr4q24              | negative regulation of transcription from  | ---                                 | -1.00         | -1.26           | -1.13     | -1.12       | 1.17      | 1.13        | -2.00      | -1.31        | -1.32      | -1.12        | -1.18      | 1.04         |
| UBE2D3    | ubiquitin-conjugating enzy   | chr4q24              | negative regulation of transcription from  | ---                                 | -1.01         | -1.02           | -1.02     | 1.04        | 1.05      | 1.03        | -1.07      | -1.08        | 1.12       | 1.05         | 1.19       | 1.19         |
| UBE2D3    | ubiquitin-conjugating enzy   | chr4q24              | negative regulation of transcription from  | ---                                 | 1.16          | 1.14            | 1.05      | -1.03       | 1.19      | 1.29        | -1.12      | -1.22        | -2.07      | -1.99        | -1.69      | -1.69        |
| UBE2D4    | ubiquitin-conjugating enzy   | chr7p13              | protein ubiquitination                     | ---                                 | 1.05          | -1.07           | -1.05     | 1.01        | 1.09      | 1.18        | -1.10      | -1.11        | -1.40      | -1.23        | -1.72      | -1.35        |

| ID       | Gene Title                         | Chromosomal Location | 1st Gene Ontology Biological Process                                 | Pathway | A2497 30 mins | A2497P' 30 mins | A2497 2 h | A2497P' 2 h | A2497 4 h | A2497P' 4 h | A2497 24 h | A2497P' 24 h | A2497 48 h | A2497P' 48 h | A2497 72 h | A2497P' 72 h |
|----------|------------------------------------|----------------------|----------------------------------------------------------------------|---------|---------------|-----------------|-----------|-------------|-----------|-------------|------------|--------------|------------|--------------|------------|--------------|
| UBE2D4   | ubiquitin-conjugating enzyme       | chr7p13              | protein ubiquitination                                               | ---     | 1.08          | -1.01           | 1.12      | 1.13        | 1.07      | -1.04       | 1.19       | 1.04         | -1.57      | -1.28        | -1.64      | -1.48        |
| UBE2D4   | ubiquitin-conjugating enzyme       | chr7p13              | protein ubiquitination                                               | ---     | 1.09          | 1.08            | 1.03      | 1.04        | 1.03      | -1.14       | 1.02       | 1.13         | -1.74      | -1.35        | -1.43      | -1.45        |
| UBE2D4   | ubiquitin-conjugating enzyme       | chr7p13              | protein ubiquitination                                               | ---     | 1.02          | 1.10            | -1.02     | 1.01        | -1.08     | -1.04       | -1.35      | -1.20        | -1.33      | 1.01         | -1.59      | -1.32        |
| UBE2D4   | ubiquitin-conjugating enzyme       | chr7p13              | protein ubiquitination                                               | ---     | 1.01          | 1.07            | 1.06      | 1.01        | -1.02     | -1.01       | 1.11       | 1.11         | -1.84      | -1.26        | -1.47      | -1.46        |
| UBE2E1   | ubiquitin-conjugating enzyme       | chr3p24.2            | cell cycle checkpoint                                                | ---     | -1.02         | 1.00            | -1.04     | 1.14        | -1.06     | 1.05        | -1.12      | -1.18        | -1.02      | -1.04        | -1.12      | -1.12        |
| UBE2E3   | ubiquitin-conjugating enzyme       | chr2q32.1            | protein ubiquitination                                               | ---     | 1.11          | 1.11            | -1.06     | -1.06       | -1.02     | 1.01        | -1.19      | -1.21        | -1.50      | -1.28        | -1.61      | -1.77        |
| UBE2F    | ubiquitin-conjugating enzyme       | chr2q37.3            | protein neddylation                                                  | ---     | -1.10         | -1.14           | -1.13     | -1.18       | -1.04     | -1.01       | 1.10       | 1.03         | 1.08       | 1.03         | 1.33       | 1.26         |
| UBE2F    | ubiquitin-conjugating enzyme       | chr2q37.3            | protein neddylation                                                  | ---     | -1.03         | -1.13           | 1.01      | 1.03        | -1.17     | -1.04       | -1.01      | 1.04         | 1.25       | 1.22         | 1.31       | 1.44         |
| UBE2F    | ubiquitin-conjugating enzyme       | chr2q37.3            | protein neddylation                                                  | ---     | -1.01         | -1.03           | -1.03     | 1.07        | -1.13     | -1.03       | 1.09       | 1.11         | 1.19       | 1.21         | 1.37       | 1.52         |
| UBE2G1   | ubiquitin-conjugating enzyme       | chr17p13.2           | ubiquitin-dependent protein catabolic process                        | ---     | 1.14          | 1.05            | 1.07      | 1.09        | 1.14      | 1.05        | 1.05       | 1.00         | 1.23       | 1.11         | 1.43       | 1.10         |
| UBE2G1   | ubiquitin-conjugating enzyme       | chr17p13.2           | ubiquitin-dependent protein catabolic process                        | ---     | 1.18          | 1.27            | -1.10     | -1.22       | -1.07     | 1.02        | -1.52      | -1.19        | -1.78      | -1.80        | -1.30      | -1.70        |
| UBE2G2   | ubiquitin-conjugating enzyme       | chr21q22.3           | ubiquitin-dependent protein catabolic process                        | ---     | -1.08         | -1.03           | 1.01      | 1.03        | 1.09      | 1.05        | -1.17      | -1.10        | -1.20      | -1.12        | -1.20      | -1.09        |
| UBE2G2   | ubiquitin-conjugating enzyme       | chr21q22.3           | ubiquitin-dependent protein catabolic process                        | ---     | 1.00          | -1.02           | 1.01      | 1.07        | -1.04     | 1.02        | -1.03      | 1.02         | -1.11      | -1.05        | -1.26      | -1.03        |
| UBE2H    | ubiquitin-conjugating enzyme       | chr7q32              | ubiquitin-dependent protein catabolic process                        | ---     | -1.12         | -1.06           | 1.14      | 1.02        | -1.16     | -1.04       | 1.25       | 1.12         | -1.06      | 1.35         | 1.34       | 1.13         |
| UBE2H    | ubiquitin-conjugating enzyme       | chr7q32              | ubiquitin-dependent protein catabolic process                        | ---     | 1.09          | -1.12           | -1.04     | -1.26       | -1.10     | -1.09       | 1.19       | 1.11         | 1.09       | 1.26         | 1.04       | 1.16         |
| UBE2H    | ubiquitin-conjugating enzyme       | chr7q32              | ubiquitin-dependent protein catabolic process                        | ---     | 1.09          | 1.10            | 1.01      | -1.03       | -1.03     | 1.00        | 1.02       | 1.02         | 1.08       | 1.19         | -1.16      | -1.11        |
| UBE2I    | ubiquitin-conjugating enzyme       | chr16p13.3           | negative regulation of transcription from RNA polymerase II promoter | ---     | 1.16          | -1.03           | 1.27      | 1.13        | 1.26      | 1.30        | -1.08      | -1.02        | -1.49      | -1.25        | -1.97      | -1.53        |
| UBE2J1   | ubiquitin-conjugating enzyme       | chr6q15              | protein ubiquitination                                               | ---     | 1.15          | 1.16            | 1.06      | -1.18       | 1.18      | 1.18        | -1.02      | -1.17        | -1.52      | -1.51        | -1.16      | -1.16        |
| UBE2J1   | ubiquitin-conjugating enzyme       | chr6q15              | protein N-linked glycosylation via asparagine                        | ---     | -1.08         | -1.05           | 1.22      | 1.21        | -1.00     | 1.10        | 1.06       | 1.24         | 1.40       | 1.41         | 1.65       | 2.04         |
| UBE2J1   | ubiquitin-conjugating enzyme       | chr6q15              | protein ubiquitination                                               | ---     | -1.10         | -1.04           | 1.10      | 1.15        | 1.07      | -1.06       | 1.21       | 1.08         | 1.84       | 1.52         | 1.39       | 1.61         |
| UBE2J2   | ubiquitin-conjugating enzyme       | chr1p36.33           | response to unfolded protein                                         | ---     | 1.08          | 1.09            | 1.04      | -1.01       | -1.02     | -1.05       | 1.06       | 1.12         | 1.06       | -1.08        | 1.41       | 1.30         |
| UBE2K    | ubiquitin-conjugating enzyme       | chr4p14              | ubiquitin-dependent protein catabolic process                        | ---     | 1.11          | 1.13            | -1.01     | -1.07       | -1.10     | 1.03        | -1.06      | -1.01        | -1.63      | -1.43        | -1.15      | -1.34        |
| UBE2K    | ubiquitin-conjugating enzyme       | chr4p14              | ubiquitin-dependent protein catabolic process                        | ---     | -1.07         | -1.05           | -1.07     | -1.05       | 1.14      | 1.05        | 1.13       | 1.19         | 1.09       | 1.05         | 1.36       | 1.24         |
| UBE2L3   | ubiquitin-conjugating enzyme       | chr22q11.21          | protein polyubiquitination                                           | ---     | -1.04         | 1.04            | 1.03      | 1.05        | -1.08     | -1.06       | -1.23      | -1.12        | 1.04       | -1.08        | 1.17       | 1.20         |
| UBE2L3   | ubiquitin-conjugating enzyme       | chr22q11.21          | protein polyubiquitination                                           | ---     | -1.08         | -1.04           | -1.01     | 1.01        | 1.01      | -1.03       | 1.00       | 1.06         | 1.17       | 1.07         | 1.19       | 1.20         |
| UBE2L6   | ubiquitin-conjugating enzyme       | chr11q12             | cellular protein modification process                                | ---     | -1.03         | -1.10           | 1.01      | 1.03        | 1.03      | -1.02       | 1.25       | 1.09         | 1.46       | 1.50         | 1.16       | 1.26         |
| UBE2M    | ubiquitin-conjugating enzyme       | chr19q13.43          | cellular protein modification process                                | ---     | 1.05          | 1.00            | -1.11     | 1.01        | 1.05      | -1.03       | 1.02       | -1.08        | 1.30       | 1.30         | 1.10       | 1.14         |
| UBE2N    | ubiquitin-conjugating enzyme       | chr12q22             | double-strand break repair via homologous recombination              | ---     | 1.32          | 1.25            | 1.18      | 1.07        | -1.10     | -1.07       | -1.11      | -1.16        | -1.04      | 1.11         | 1.16       | 1.07         |
| UBE2N    | ubiquitin-conjugating enzyme       | chr12q22             | double-strand break repair via homologous recombination              | ---     | 1.16          | 1.17            | 1.13      | 1.05        | -1.07     | 1.03        | -1.38      | -1.25        | -1.56      | -1.43        | -1.15      | -1.33        |
| UBE2O    | ubiquitin-conjugating enzyme       | chr17q25.1           | protein ubiquitination                                               | ---     | 1.05          | -1.03           | 1.03      | -1.09       | -1.05     | -1.02       | -1.12      | 1.04         | 1.19       | 1.12         | 1.04       | 1.01         |
| UBE2Q1   | ubiquitin-conjugating enzyme       | chr1q21.3            | protein ubiquitination                                               | ---     | -1.09         | -1.14           | 1.14      | 1.07        | 1.33      | 1.08        | -1.42      | -1.17        | -1.48      | -1.61        | -2.47      | -2.16        |
| UBE2Q1   | ubiquitin-conjugating enzyme       | chr1q21.3            | protein ubiquitination                                               | ---     | -1.05         | -1.01           | -1.06     | -1.12       | 1.16      | -1.00       | -1.25      | -1.22        | -2.00      | -1.69        | -2.55      | -2.36        |
| UBE2R2   | ubiquitin-conjugating enzyme       | chr9p13.3            | protein monoubiquitination                                           | ---     | 1.01          | -1.01           | -1.05     | -1.04       | -1.03     | -1.01       | -1.07      | -1.06        | 1.09       | 1.23         | 1.10       | 1.08         |
| UBE2R2   | ubiquitin-conjugating enzyme       | chr9p13.3            | protein monoubiquitination                                           | ---     | 1.03          | -1.02           | -1.10     | -1.21       | -1.01     | 1.05        | -1.17      | -1.22        | 1.04       | 1.19         | 1.19       | 1.20         |
| UBE2S    | ubiquitin-conjugating enzyme       | chr19q13.43          | cellular protein modification process                                | ---     | -1.01         | -1.09           | 1.04      | 1.16        | -1.01     | -1.21       | 1.20       | 1.13         | 2.67       | 1.73         | 2.62       | 2.79         |
| UBE2U    | ubiquitin-conjugating enzyme       | chr1p31.3            | protein ubiquitination                                               | ---     | 1.12          | -1.00           | -2.04     | -1.45       | 1.35      | 1.77        | -1.48      | -1.20        | 5.06       | 1.76         | 1.55       | 1.70         |
| UBE2V2   | ubiquitin-conjugating enzyme       | chr8q11.21           | protein polyubiquitination                                           | ---     | -1.03         | -1.01           | -1.02     | -1.10       | 1.08      | 1.13        | -1.26      | -1.15        | -1.05      | 1.22         | 1.12       | 1.15         |
| UBE2V2   | ubiquitin-conjugating enzyme       | chr8q11.21           | protein polyubiquitination                                           | ---     | -1.08         | -1.04           | -1.09     | 1.03        | -1.16     | 1.05        | -1.20      | -1.19        | 1.18       | 1.30         | 1.09       | 1.07         |
| UBE2W    | ubiquitin-conjugating enzyme       | chr8q21.11           | DNA repair                                                           | ---     | 1.33          | 1.42            | 1.02      | -1.32       | 1.07      | 1.07        | -1.08      | -1.00        | 1.23       | 1.10         | 1.94       | 1.03         |
| UBE2Z    | ubiquitin-conjugating enzyme       | chr17q21.32          | apoptotic process                                                    | ---     | 1.07          | 1.21            | -1.07     | -1.05       | 1.15      | 1.17        | 1.37       | -1.18        | -1.88      | -2.12        | -1.90      | -1.61        |
| UBE3A    | ubiquitin protein ligase E3        | chr15q11.2           | ovarian follicle development                                         | ---     | -1.08         | -1.08           | 1.01      | 1.07        | 1.06      | 1.06        | 1.00       | 1.03         | 1.05       | 1.10         | 1.15       | 1.24         |
| UBE3A    | ubiquitin protein ligase E3        | chr15q11.2           | ovarian follicle development                                         | ---     | 1.16          | -1.01           | -1.09     | -1.15       | 1.14      | 1.01        | -1.13      | -1.13        | -1.68      | -1.53        | -1.84      | -1.73        |
| UBE3B    | ubiquitin protein ligase E3        | chr12q24.11          | cellular protein modification process                                | ---     | 1.09          | 1.07            | 1.16      | 1.04        | 1.12      | 1.11        | -1.11      | -1.19        | -1.70      | -1.36        | -1.52      | -1.41        |
| UBE3B    | ubiquitin protein ligase E3        | chr12q24.11          | cellular protein modification process                                | ---     | 1.13          | 1.20            | 1.20      | 1.20        | 1.38      | -1.06       | -1.13      | -1.22        | -1.11      | -1.37        | 1.09       | -1.07        |
| UBE3B    | ubiquitin protein ligase E3        | chr12q24.11          | protein ubiquitination                                               | ---     | 1.02          | -1.04           | 1.04      | 1.17        | 1.01      | -1.16       | 1.25       | 1.23         | 2.09       | 1.83         | 1.48       | 1.43         |
| UBE3C    | ubiquitin protein ligase E3        | chr7q36.3            | protein polyubiquitination                                           | ---     | 1.13          | 1.22            | 1.07      | -1.04       | 1.06      | 1.01        | 1.48       | 1.27         | 2.41       | 1.67         | 2.57       | 2.09         |
| UBE3C    | ubiquitin protein ligase E3        | chr7q36.3            | protein polyubiquitination                                           | ---     | 1.18          | 1.56            | -1.09     | -1.19       | -1.05     | -1.12       | -1.81      | 1.17         | 1.59       | -1.06        | -1.12      | -2.83        |
| UBE3D    | ubiquitin protein ligase E3        | chr6q14.1            | protein ubiquitination                                               | ---     | -1.01         | -1.15           | 1.06      | 1.05        | 1.13      | -1.05       | -1.23      | 1.06         | -1.85      | -1.37        | -1.25      | -1.25        |
| UBE4A    | ubiquitination factor E4           | chr11q23.3           | protein polyubiquitination                                           | ---     | -1.10         | -1.06           | -1.02     | 1.02        | 1.13      | -1.01       | 1.01       | 1.05         | -1.08      | -1.00        | -1.20      | -1.09        |
| UBE4B    | ubiquitination factor E4           | chr1p36.3            | protein polyubiquitination                                           | ---     | -1.01         | 1.01            | -1.02     | -1.01       | 1.01      | -1.03       | -1.21      | -1.13        | -1.54      | -1.26        | -1.45      | -1.31        |
| UBE4B    | ubiquitination factor E4           | chr1p36.3            | protein polyubiquitination                                           | ---     | 1.10          | 1.05            | 1.16      | 1.08        | 1.15      | 1.12        | -1.17      | -1.13        | -1.64      | -1.30        | -1.35      | -1.32        |
| UBE4B    | ubiquitination factor E4           | chr1p36.3            | protein polyubiquitination                                           | ---     | 1.03          | 1.05            | 1.02      | -1.09       | 1.10      | 1.15        | -1.11      | -1.15        | -1.32      | -1.36        | -1.57      | -1.69        |
| UBE4B    | ubiquitination factor E4           | chr1p36.3            | protein polyubiquitination                                           | ---     | -1.05         | -1.01           | 1.10      | -1.04       | 1.18      | 1.09        | 1.02       | -1.01        | -1.87      | -1.48        | -1.53      | -1.64        |
| UBE4B    | ubiquitination factor E4           | chr1p36.3            | protein polyubiquitination                                           | ---     | -1.07         | 1.05            | 1.02      | -1.02       | 1.08      | -1.05       | 1.05       | -1.18        | -1.69      | -1.47        | -1.45      | -1.42        |
| UBFD1    | ubiquitin family domain containing | chr16p12             | 0                                                                    | ---     | 1.20          | 1.18            | 1.03      | -1.15       | -1.05     | 1.02        | -1.21      | -1.26        | -1.42      | -1.29        | -1.23      | -1.56        |
| UBIAD1   | UbiA prenyltransferase domain      | chr1p36.22           | ubiquinone biosynthetic process                                      | ---     | -1.15         | -1.19           | -1.04     | 1.20        | -1.20     | -1.21       | -1.11      | 1.15         | 1.35       | 1.09         | 1.63       | 1.61         |
| UBL3     | ubiquitin-like 3                   | chr13q12-q13         | 0                                                                    | ---     | 1.07          | 1.16            | 1.05      | -1.13       | -1.16     | -1.02       | -1.32      | 1.02         | -1.43      | -1.22        | -1.34      | -1.56        |
| UBL3     | ubiquitin-like 3                   | chr13q12-q13         | 0                                                                    | ---     | 1.01          | -1.00           | 1.05      | 1.00        | 1.02      | -1.05       | 1.00       | -1.18        | -1.94      | -1.55        | -1.82      | -1.58        |
| UBL7     | ubiquitin-like 7 (bone marrow)     | chr15q24.1           | 0                                                                    | ---     | 1.01          | -1.05           | 1.06      | 1.05        | -1.02     | -1.07       | 1.12       | 1.02         | -1.14      | -1.17        | -1.33      | -1.19        |
| UBL7-AS1 | UBL7 antisense RNA 1 (h)           | chr15q24.1           | 0                                                                    | ---     | -1.33         | -1.23           | -1.01     | -1.20       | 1.25      | -1.24       | 1.06       | -1.16        | -1.73      | -1.55        | -1.18      | -1.18        |
| UBLCP1   | ubiquitin-like domain containing   | chr5q33.3            | 0                                                                    | ---     | -1.03         | 1.02            | -1.11     | -1.10       | -1.09     | -1.01       | -1.11      | 1.09         | -1.11      | -1.12        | -1.15      | -1.29        |
| UBN1     | ubiquitin 1                        | chr16p13.3           | regulation of transcription from RNA polymerase II promoter          | ---     | -1.08         | -1.03           | -1.02     | 1.03        | -1.03     | -1.03       | 1.06       | 1.06         | 1.23       | 1.15         | 1.11       | 1.24         |
| UBN1     | ubiquitin 1                        | chr16p13.3           | regulation of transcription from RNA polymerase II promoter          | ---     | -1.15         | -1.30           | 1.15      | 1.15        | 1.02      | -1.02       | 1.12       | 1.12         | 1.29       | 1.11         | 1.28       | 1.30         |
| UBOX5    | U-box domain containing            | chr20p13             | protein polyubiquitination                                           | ---     | 1.08          | 1.21            | -1.01     | 1.26        | 1.20      | -1.00       | 1.47       | 1.36         | 1.97       | 1.73         | 1.41       | 1.06         |
| UBP1     | upstream binding protein 1         | chr3p22.3            | angiogenesis                                                         | ---     | 1.10          | 1.09            | 1.03      | 1.08        | -1.06     | 1.04        | -1.24      | -1.19        | -1.42      | -1.42        | -1.55      | -1.65        |
| UBQLN1   | ubiquilin 1                        | chr9q22.9q21.2-q21.1 | response to hypoxia                                                  | ---     | -1.00         | 1.13            | -1.04     | -1.02       | -1.08     | -1.00       | -1.05      | -1.01        | 1.27       | 1.41         | 1.34       | 1.31         |

| ID          | Gene Title                     | Chromosomal Location | 1st Gene Ontology Biological Process       | Pathway                                  | A2497 30 mins | A2497P' 30 mins | A2497 2 h | A2497P' 2 h | A2497 4 h | A2497P' 4 h | A2497 24 h | A2497P' 24 h | A2497 48 h | A2497P' 48 h | A2497 72 h | A2497P' 72 h |
|-------------|--------------------------------|----------------------|--------------------------------------------|------------------------------------------|---------------|-----------------|-----------|-------------|-----------|-------------|------------|--------------|------------|--------------|------------|--------------|
| UBQLN2      | ubiquilin 2                    | chrXp11.21           | nucleotide-excision repair                 | ---                                      | 1.04          | 1.05            | 1.01      | 1.02        | 1.01      | 1.02        | 1.01       | -1.06        | -1.05      | -1.05        | -1.09      | -1.16        |
| UBQLN2      | NULL                           | ---                  | cell death                                 | ---                                      | -1.03         | 1.07            | -1.15     | 1.04        | 1.13      | 1.07        | -1.61      | -1.11        | -2.08      | -1.50        | -1.97      | -2.08        |
| UBQLN4      | ubiquilin 4                    | chr1q21              | regulation of proteasomal ubiquitin-depe   | ---                                      | -1.13         | -1.05           | -1.21     | -1.14       | 1.16      | 1.13        | -1.27      | -1.07        | 1.06       | 1.17         | -1.13      | 1.10         |
| UBQLN4      | ubiquilin 4                    | chr1q21              | nucleotide-excision repair                 | ---                                      | 1.05          | -1.05           | -1.01     | 1.07        | 1.06      | 1.03        | -1.05      | -1.06        | 1.40       | 1.29         | 1.12       | 1.24         |
| UBR1        | ubiquitin protein ligase E3    | chr15q13             | ubiquitin-dependent protein catabolic pro  | ---                                      | -1.02         | 1.06            | -1.03     | -1.08       | -1.06     | -1.02       | -1.18      | -1.10        | -1.41      | -1.19        | -1.25      | -1.29        |
| UBR2        | ubiquitin protein ligase E3    | chr6p21.1            | chromatin silencing                        | ---                                      | 1.00          | 1.01            | 1.02      | -1.04       | -1.08     | -1.01       | -1.46      | -1.24        | -1.89      | -1.52        | -1.57      | -1.31        |
| UBR2        | ubiquitin protein ligase E3    | chr6p21.1            | chromatin silencing                        | ---                                      | -1.18         | -1.15           | 1.10      | 1.01        | 1.15      | -1.06       | 1.19       | 1.17         | -1.08      | -1.11        | 1.19       | 1.32         |
| UBR3        | ubiquitin protein ligase E3    | chr2q31.1            | in utero embryonic development             | ---                                      | 1.26          | 1.15            | 1.05      | -1.07       | -1.02     | -1.01       | -1.15      | 1.06         | -2.51      | -1.83        | -1.42      | -2.09        |
| UBR3        | ubiquitin protein ligase E3    | chr2q31.1            | in utero embryonic development             | ---                                      | 1.09          | -1.02           | 1.08      | -1.02       | -1.12     | 1.09        | -1.54      | -1.18        | -1.95      | -1.36        | -1.51      | -1.64        |
| UBR4        | ubiquitin protein ligase E3    | chr1p36.13           | protein ubiquitination                     | ---                                      | -1.02         | -1.10           | -1.18     | -1.78       | 1.50      | 2.08        | -2.45      | -1.00        | 4.94       | 3.86         | 3.23       | 2.35         |
| UBR5        | ubiquitin protein ligase E3    | chr8q22              | protein polyubiquitination                 | ---                                      | 1.53          | 1.32            | 1.01      | 1.12        | -1.25     | -1.23       | -1.18      | -1.21        | -1.61      | -1.47        | -1.42      | -1.65        |
| UBR5        | ubiquitin protein ligase E3    | chr8q22              | protein polyubiquitination                 | ---                                      | -1.05         | -1.04           | -1.06     | -1.10       | -1.10     | -1.02       | -1.12      | -1.08        | -1.76      | -1.40        | -1.41      | -1.45        |
| UBR7        | ubiquitin protein ligase E3    | chr14q32.12          | protein ubiquitination                     | ---                                      | 1.04          | 1.09            | 1.02      | 1.03        | -1.03     | -1.01       | -1.00      | -1.05        | -1.55      | -1.37        | -1.32      | -1.40        |
| UBTD1       | ubiquitin domain containing    | chr10q24.2           | 0                                          | ---                                      | -1.28         | -1.33           | -1.05     | -1.29       | 1.26      | -1.09       | -1.03      | 1.31         | 1.65       | 1.38         | 1.38       | 1.47         |
| UBTD2       | ubiquitin domain containing    | chr5q35.1            | 0                                          | ---                                      | 1.02          | 1.12            | -1.01     | -1.12       | -1.09     | 1.02        | -1.11      | -1.18        | -1.55      | -1.31        | -1.53      | -1.74        |
| UBTD2       | ubiquitin domain containing    | chr5q35.1            | 0                                          | ---                                      | 1.23          | 1.06            | 1.07      | 1.09        | 1.02      | -1.05       | -1.02      | -1.11        | -1.60      | -1.36        | -1.46      | -1.42        |
| UBTF        | upstream binding transcript    | chr17q21.31          | blastocyst growth                          | ---                                      | -1.05         | 1.00            | 1.02      | -1.12       | 1.03      | -1.01       | 1.01       | -1.04        | -1.34      | -1.41        | -1.97      | -1.96        |
| UBTF        | upstream binding transcript    | chr17q21.31          | blastocyst growth                          | ---                                      | -1.02         | 1.04            | 1.12      | -1.05       | 1.21      | 1.12        | -1.33      | -1.18        | -1.85      | -1.36        | -1.29      | -1.32        |
| UBTF        | upstream binding transcript    | chr17q21.31          | blastocyst growth                          | ---                                      | 1.00          | 1.04            | -1.17     | -1.03       | 1.19      | -1.11       | -1.05      | -1.02        | -1.16      | -1.32        | -2.00      | -2.39        |
| UBTF        | upstream binding transcript    | chr17q21.31          | blastocyst growth                          | ---                                      | 1.01          | -1.13           | 1.11      | -1.09       | 1.03      | 1.01        | 1.07       | -1.12        | -1.29      | -1.23        | -1.81      | -1.93        |
| UBXN10      | UBX domain protein 10          | chr1p36.12           | 0                                          | ---                                      | 1.35          | -1.45           | 1.17      | 1.03        | 1.31      | 1.06        | -1.28      | 1.20         | 1.05       | -1.07        | -1.67      | -1.29        |
| UBXN10      | UBX domain protein 10          | chr1p36.12           | 0                                          | ---                                      | 1.37          | 1.41            | 1.27      | -1.04       | -1.16     | -1.07       | 1.16       | -1.23        | -1.71      | -1.22        | -1.51      | -1.52        |
| UBXN11      | UBX domain protein 11          | chr1p36.11           | 0                                          | ---                                      | -1.04         | -1.02           | -1.02     | 1.29        | 1.03      | -1.06       | 1.30       | -1.36        | -1.09      | -1.09        | -2.14      | -1.58        |
| UBXN2A      | UBX domain protein 2A          | chr2p23.3            | regulation of gene expression              | ---                                      | -1.07         | -1.09           | 1.05      | -1.14       | 1.28      | 1.17        | -1.63      | -1.16        | -2.39      | -2.08        | -1.84      | -2.30        |
| UBXN2A      | UBX domain protein 2A          | chr2p23.3            | regulation of gene expression              | ---                                      | 1.03          | 1.03            | 1.10      | 1.04        | 1.03      | 1.03        | 1.15       | 1.14         | -1.17      | -1.17        | -1.22      | -1.17        |
| UBXN2B      | UBX domain protein 2B          | chr8q12.1            | 0                                          | ---                                      | 1.07          | 1.03            | 1.02      | -1.01       | 1.09      | -1.09       | 1.11       | 1.24         | 1.05       | 1.03         | -1.77      | -1.55        |
| UBXN2B      | UBX domain protein 2B          | chr8q12.1            | 0                                          | ---                                      | 1.09          | 1.16            | 1.12      | 1.03        | 1.19      | 1.08        | 1.14       | -1.03        | -1.47      | -1.26        | -1.48      | -1.68        |
| UBXN4       | UBX domain protein 4           | chr2q21.3            | response to unfolded protein               | ---                                      | -1.09         | -1.05           | -1.06     | -1.01       | 1.03      | -1.01       | -1.00      | -1.16        | -1.11      | -1.07        | -1.07      | -1.06        |
| UBXN7       | UBX domain protein 7           | chr3q29              | 0                                          | ---                                      | 1.16          | 1.13            | 1.10      | -1.07       | -1.14     | -1.05       | -1.05      | 1.04         | -1.62      | -1.66        | -1.06      | -1.30        |
| UBXN7-AS1   | UBXN7 antisense RNA 1          | ---                  | 0                                          | ---                                      | 1.01          | -1.04           | 1.26      | -1.73       | -1.57     | 1.03        | -1.30      | 1.25         | 1.06       | 1.39         | -3.18      | -1.89        |
| UBXN8       | UBX domain protein 8           | chr8p12-p11.2        | single fertilization                       | ---                                      | 1.00          | 1.03            | 1.13      | 1.20        | 1.04      | 1.06        | -1.17      | -1.16        | -1.62      | -1.36        | -1.41      | -1.54        |
| UCHL1       | ubiquitin carboxyl-terminal    | chr4p14              | proteolysis                                | ---                                      | -1.01         | -1.03           | -1.01     | -1.06       | 1.07      | -1.02       | 1.14       | -1.00        | 1.27       | 1.29         | 1.27       | 1.48         |
| UCHL5       | ubiquitin carboxyl-terminal    | chr1q32              | DNA repair                                 | ---                                      | 1.00          | 1.03            | 1.03      | 1.08        | 1.01      | 1.03        | 1.24       | 1.24         | 1.05       | 1.02         | 1.35       | 1.09         |
| UCHL5       | ubiquitin carboxyl-terminal    | chr1q32              | DNA repair                                 | ---                                      | 1.19          | 1.13            | 1.00      | -1.03       | 1.01      | 1.05        | -1.07      | 1.08         | -1.25      | -1.19        | 1.16       | 1.09         |
| UCHL5       | ubiquitin carboxyl-terminal    | chr1q32              | DNA repair                                 | ---                                      | 1.07          | 1.11            | -1.01     | -1.18       | -1.17     | -1.09       | -1.53      | -1.17        | 1.17       | 1.37         | 1.39       | 1.55         |
| UCKL1       | uridine-cytidine kinase 1-like | chr20q13.33          | UMP biosynthetic process                   | ---                                      | -1.10         | -1.10           | -1.11     | -1.02       | -1.07     | -1.39       | 1.35       | 1.19         | 1.21       | -1.10        | -1.24      | -1.18        |
| UCN         | urocortin                      | chr2p23-p21          | positive regulation of protein phosphoryl  | ---                                      | 1.70          | 1.71            | -1.18     | -1.29       | 1.10      | -1.43       | 1.19       | 1.56         | 2.16       | 1.53         | 1.67       | 1.62         |
| UCP2        | uncoupling protein 2 (mito)    | chr11q13             | response to superoxide                     | Electron_Transport_Chain // GenMAPP      | -1.07         | 1.06            | -1.16     | -1.06       | -1.16     | -1.19       | 1.05       | 1.13         | 1.09       | 1.03         | -1.06      | -1.12        |
| UCP2        | uncoupling protein 2 (mito)    | chr11q13             | response to superoxide                     | Electron_Transport_Chain // GenMAPP      | -1.05         | 1.00            | -1.08     | -1.07       | -1.02     | -1.03       | -1.08      | -1.09        | -1.34      | -1.13        | -1.27      | -1.21        |
| UCP3        | uncoupling protein 3 (mito)    | chr11q13.4           | response to superoxide                     | Circadian_Exercise // GenMAPP // Electro | 1.58          | 1.32            | 1.36      | 1.46        | -1.33     | -1.65       | -1.39      | 1.00         | -1.16      | -1.58        | -4.75      | -1.56        |
| UFL1        | UFM1-specific ligase 1         | chr6p16.1            | negative regulation of protein ubiquitina  | ---                                      | -2.13         | -1.18           | 1.09      | 1.35        | 1.10      | 1.17        | -1.07      | 1.45         | -1.16      | 1.95         | 1.61       | 1.70         |
| UFSP1       | UFM1-specific peptidase 1      | chr7q22.1            | 0                                          | ---                                      | -1.20         | -1.20           | -1.10     | -1.02       | -1.08     | -1.18       | -1.05      | -1.02        | -1.70      | -1.58        | -1.05      | 1.09         |
| UFSP2       | UFM1-specific peptidase 2      | chr4q35.1            | proteolysis                                | ---                                      | -1.03         | -1.04           | -1.00     | 1.00        | 1.06      | 1.05        | 1.31       | 1.16         | 1.18       | 1.22         | 1.07       | 1.21         |
| UG0898H09   | uncharacterized LOC64376       | chr8q12.3            | 0                                          | ---                                      | -1.56         | -1.46           | -2.68     | -1.27       | -1.22     | 2.04        | -4.53      | -1.08        | -1.00      | -13.57       | -2.56      | -1.57        |
| UGCG        | UDP-glucose ceramide gluc      | chr9q31              | lipid metabolic process                    | ---                                      | 1.17          | 1.11            | -1.07     | -1.13       | -1.13     | 1.02        | -1.05      | -1.02        | 1.04       | 1.10         | 1.48       | 1.27         |
| UGCG        | UDP-glucose ceramide gluc      | chr9q31              | lipid metabolic process                    | ---                                      | -1.07         | -1.09           | 1.01      | 1.00        | 1.29      | 1.04        | 1.19       | 1.06         | 1.52       | 1.23         | 2.13       | 1.88         |
| UGCG        | UDP-glucose ceramide gluc      | chr9q31              | lipid metabolic process                    | ---                                      | 1.19          | 1.08            | 1.01      | 1.05        | 1.09      | 1.11        | -1.00      | 1.12         | 1.44       | 1.45         | 1.62       | 1.38         |
| UGGT1       | UDP-glucose glycoprotein       | chr2q14.3            | protein folding                            | ---                                      | 1.08          | 1.02            | -1.04     | 1.21        | 1.03      | 1.02        | -1.04      | 1.02         | -1.15      | -1.03        | -1.64      | -1.45        |
| UGGT1       | UDP-glucose glycoprotein       | chr2q14.3            | protein folding                            | ---                                      | -1.04         | -1.19           | -1.04     | 1.16        | 1.17      | 1.07        | -1.01      | 1.07         | 1.05       | 1.17         | 1.06       | 1.44         |
| UGGT2       | UDP-glucose glycoprotein       | chr13q32.1           | protein folding                            | ---                                      | 1.04          | -1.09           | 1.69      | 1.77        | -1.55     | 1.32        | 4.21       | 2.49         | 1.48       | 1.22         | -1.17      | 1.67         |
| UGGT2       | UDP-glucose glycoprotein       | chr13q32.1           | protein folding                            | ---                                      | -1.00         | -1.00           | -1.10     | 1.20        | -1.19     | 1.11        | 1.03       | 1.05         | -1.98      | -1.76        | -1.41      | -1.73        |
| UGGT2       | UDP-glucose glycoprotein       | chr13q32.1           | protein folding                            | ---                                      | -1.05         | -1.21           | 1.06      | 1.52        | -1.00     | 1.15        | 1.10       | 1.39         | 1.05       | 1.04         | -1.25      | -1.32        |
| UGGT2       | UDP-glucose glycoprotein       | chr13q32.1           | protein folding                            | ---                                      | 1.09          | 1.10            | -1.03     | -1.03       | 1.02      | -1.03       | 1.16       | 1.08         | -1.09      | -1.24        | -1.35      | -1.27        |
| UGP2        | UDP-glucose pyrophospho        | chr2p14-p13          | carbohydrate metabolic process             | Circadian_Exercise // GenMAPP // Glycoge | -1.20         | -1.20           | 1.08      | -1.16       | 1.22      | 1.07        | -1.11      | -1.34        | -2.31      | -1.48        | -1.77      | -1.42        |
| UGP2        | UDP-glucose pyrophospho        | chr2p14-p13          | carbohydrate metabolic process             | Circadian_Exercise // GenMAPP // Glycoge | -1.05         | -1.04           | 1.03      | 1.09        | 1.15      | 1.04        | 1.06       | -1.08        | 1.20       | 1.31         | 1.25       | 1.39         |
| UGT1A1 // U | UDP glucuronosyltransferase    | chr2q37              | liver development                          | Irinotecan_pathway_PharmGKB // GenMAF    | -1.01         | 1.13            | -1.03     | -1.09       | 1.47      | 1.38        | 1.17       | 1.17         | 3.16       | 2.97         | 9.82       | 10.75        |
| UGT1A1 // U | UDP glucuronosyltransferase    | chr2q37              | liver development                          | Irinotecan_pathway_PharmGKB // GenMAF    | -1.05         | 1.02            | 1.24      | 1.45        | -1.01     | -1.05       | 1.12       | -1.14        | 2.96       | 2.56         | 7.33       | 7.67         |
| UGT1A1 // U | UDP glucuronosyltransferase    | chr2q37              | liver development                          | Irinotecan_pathway_PharmGKB // GenMAF    | -1.11         | 1.09            | 1.23      | -1.08       | -1.21     | -1.31       | -1.30      | -1.10        | 2.57       | 2.43         | 8.70       | 9.38         |
| UGT1A1 // U | UDP glucuronosyltransferase    | chr2q37              | liver development                          | Irinotecan_pathway_PharmGKB // GenMAF    | -1.06         | -1.10           | 1.11      | 1.13        | 1.28      | 1.22        | 1.12       | 1.05         | 3.38       | 2.81         | 7.16       | 7.17         |
| UGT1A1 // U | UDP glucuronosyltransferase    | chr2q37              | liver development                          | Irinotecan_pathway_PharmGKB // GenMAF    | -1.08         | -1.16           | 1.30      | 1.17        | 1.00      | 1.09        | 1.06       | -1.02        | 3.03       | 2.73         | 8.05       | 8.22         |
| UGT1A8 // U | UDP glucuronosyltransferase    | chr2q37              | carbohydrate metabolic process             | Irinotecan_pathway_PharmGKB // GenMAF    | -1.17         | -1.76           | 1.85      | 1.80        | 1.59      | 1.07        | 2.05       | -1.52        | 3.96       | 1.70         | 8.71       | 11.74        |
| UGT1A8 // U | UDP glucuronosyltransferase    | chr2q37              | carbohydrate metabolic process             | Irinotecan_pathway_PharmGKB // GenMAF    | 1.58          | -1.24           | -1.80     | 1.06        | 1.12      | -1.12       | 1.04       | 1.50         | 1.92       | 2.58         | 8.51       | 7.68         |
| UGT8        | UDP glucosyltransferase 8      | chr4q26              | protein localization to paranode region of | ---                                      | 1.10          | 1.04            | 1.07      | 1.19        | -1.04     | -1.03       | -1.12      | -1.34        | -1.21      | 1.01         | 1.36       | 1.19         |
| UGT8        | UDP glucosyltransferase 8      | chr4q26              | protein localization to paranode region of | ---                                      | 1.36          | 1.04            | 1.06      | -1.06       | -1.28     | -1.01       | -1.32      | -1.26        | -1.47      | -1.04        | -1.39      | -1.27        |
| UHMK1       | U2AF homology motif (U2AF)     | chr1q23.3            | protein phosphorylation                    | ---                                      | 1.12          | 1.10            | 1.05      | 1.04        | 1.05      | 1.08        | -1.13      | -1.19        | -1.22      | -1.14        | -1.09      | -1.23        |
| UHRF1       | ubiquitin-like with PHD an     | chr19p13.3           | negative regulation of transcription from  | ---                                      | 1.14          | 1.11            | -1.09     | 1.01        | -1.21     | 1.01        | -1.23      | -1.12        | -1.62      | -1.33        | -1.58      | -1.84        |

| ID        | Gene Title                                        | Chromosomal Location | 1st Gene Ontology Biological Process                                 | Pathway                                                                   | A2497 30 mins | A2497P' 30 mins | A2497 2 h | A2497P' 2 h | A2497 4 h | A2497P' 4 h | A2497 24 h | A2497P' 24 h | A2497 48 h | A2497P' 48 h | A2497 72 h | A2497P' 72 h |
|-----------|---------------------------------------------------|----------------------|----------------------------------------------------------------------|---------------------------------------------------------------------------|---------------|-----------------|-----------|-------------|-----------|-------------|------------|--------------|------------|--------------|------------|--------------|
| UHRF1BP1L | UHRF1 binding protein 1-like                      | chr12q23.1           | 0                                                                    | ---                                                                       | 1.41          | 1.36            | -1.13     | -1.20       | -1.33     | -1.18       | 1.39       | -1.00        | 1.05       | 1.71         | 1.16       | -2.05        |
| UHRF2     | ubiquitin-like with PHD and RING finger domains 2 | chr9p24.1            | ubiquitin-dependent protein catabolic process                        | ---                                                                       | -1.06         | -1.05           | -1.09     | 1.01        | -1.01     | 1.06        | 1.06       | 1.03         | 1.21       | 1.21         | 1.32       | 1.30         |
| ULBP2     | UL16 binding protein 2                            | chr6q25              | immune response                                                      | ---                                                                       | 1.05          | 1.05            | 1.15      | 1.04        | 1.04      | -1.11       | -1.07      | 1.01         | 1.13       | 1.11         | 1.41       | 1.38         |
| ULBP2     | UL16 binding protein 2                            | chr6q25              | immune response                                                      | ---                                                                       | 1.11          | 1.09            | -1.14     | -1.20       | -1.10     | 1.04        | -1.05      | -1.04        | 1.78       | 1.68         | 2.07       | 1.93         |
| ULK1      | unc-51-like kinase 1 (C. elegans)                 | chr12q24.3           | autophagic vacuole assembly                                          | ---                                                                       | -1.15         | -1.06           | -1.05     | -1.12       | -1.05     | -1.01       | -1.03      | 1.00         | 1.00       | 1.39         | -1.02      | 1.38         |
| ULK2      | unc-51-like kinase 2 (C. elegans)                 | chr17p11.2           | protein phosphorylation                                              | ---                                                                       | -1.02         | -1.25           | 1.03      | 1.23        | -1.40     | 1.06        | -1.15      | 1.31         | -2.76      | -2.22        | -2.81      | -2.77        |
| ULK2      | unc-51-like kinase 2 (C. elegans)                 | chr17p11.2           | protein phosphorylation                                              | ---                                                                       | 1.52          | -1.01           | -1.13     | 1.02        | 1.60      | 1.51        | -1.05      | -1.14        | -2.09      | -1.69        | -1.79      | -1.76        |
| ULK4      | unc-51-like kinase 4 (C. elegans)                 | chr3p22.1            | epithelial cilium movement                                           | ---                                                                       | 1.05          | -1.20           | 1.17      | 1.04        | 1.13      | 1.18        | -1.06      | 1.06         | -1.08      | -1.20        | -2.18      | -2.58        |
| UMPS      | uridine monophosphate synthetase                  | chr3q13              | pyrimidine nucleobase metabolic process                              | ---                                                                       | 1.25          | 1.03            | 1.03      | -1.01       | 1.12      | 1.01        | -1.22      | -1.46        | -1.24      | -1.44        | -1.15      | 1.23         |
| UNC119    | unc-119 homolog (C. elegans)                      | chr17q11.2           | transport                                                            | ---                                                                       | -1.10         | -1.17           | 1.03      | -1.00       | 1.08      | -1.17       | 1.17       | -1.10        | 2.32       | 2.03         | 1.34       | 1.61         |
| UNC119B   | unc-119 homolog B (C. elegans)                    | chr12q24.31          | transport                                                            | Fatty_Acid_Degradation // GenMAPP // Mitochondrial_Fatty_Acid_Degradation | -1.00         | 1.02            | 1.01      | 1.01        | 1.04      | 1.04        | -1.06      | 1.06         | -1.32      | -1.33        | -1.21      | -1.14        |
| UNC13A    | unc-13 homolog A (C. elegans)                     | chr19p13.11          | positive regulation of neurotransmitter secretion                    | ---                                                                       | 2.47          | -1.22           | 1.34      | 2.99        | 1.04      | 2.58        | 1.23       | -1.49        | -2.08      | -1.70        | 1.55       | 2.21         |
| UNC13B    | unc-13 homolog B (C. elegans)                     | chr9p13.3            | exocytosis                                                           | ---                                                                       | 1.15          | -1.01           | 1.03      | 1.14        | -1.01     | 1.06        | -1.32      | -1.21        | -1.17      | 1.09         | -1.36      | -1.15        |
| UNC13C    | unc-13 homolog C (C. elegans)                     | chr15q21.3           | exocytosis                                                           | ---                                                                       | -1.37         | -1.97           | -3.09     | -1.56       | 14.75     | 8.28        | -1.02      | 2.10         | -1.56      | -2.05        | 3.22       | 1.09         |
| UNC5A     | unc-5 homolog A (C. elegans)                      | chr5q35.2            | apoptotic process                                                    | ---                                                                       | -1.82         | 1.15            | -1.29     | -1.40       | -1.22     | -1.48       | -1.93      | -1.15        | -1.49      | 1.23         | -1.55      | -1.06        |
| UNC5A     | unc-5 homolog A (C. elegans)                      | chr5q35.2            | apoptotic process                                                    | ---                                                                       | -1.06         | 1.71            | 1.11      | 2.22        | -1.08     | 1.83        | 1.35       | 3.17         | -2.90      | -1.16        | -1.42      | -1.42        |
| UNC5C     | unc-5 homolog C (C. elegans)                      | chr4q21-q23          | apoptotic process                                                    | ---                                                                       | 2.05          | 1.51            | 1.82      | -1.35       | -1.89     | 1.18        | 7.18       | 15.61        | 7.93       | 3.51         | -1.82      | -1.38        |
| UNC5C     | unc-5 homolog C (C. elegans)                      | chr4q21-q23          | apoptotic process                                                    | ---                                                                       | -1.64         | 2.39            | 1.09      | 1.19        | -1.08     | 1.11        | -7.91      | -1.09        | 5.90       | 1.17         | -1.31      | -1.48        |
| UNC5C     | unc-5 homolog C (C. elegans)                      | chr4q21-q23          | apoptotic process                                                    | ---                                                                       | -7.16         | -1.44           | 1.26      | -1.21       | 2.77      | 1.78        | 2.35       | 2.04         | 1.22       | 1.11         | 3.05       | 1.22         |
| UNC5CL    | unc-5 homolog C (C. elegans)                      | chr6p21.1            | signal transduction                                                  | ---                                                                       | 1.94          | 2.48            | 1.17      | 1.25        | -1.94     | 2.00        | -1.52      | 1.34         | 2.11       | 1.51         | 2.68       | 2.27         |
| UNC80     | unc-80 homolog (C. elegans)                       | chr2q35              | ion transmembrane transport                                          | ---                                                                       | 2.45          | 2.45            | -1.28     | 1.24        | 2.39      | 3.49        | -1.25      | -1.66        | 1.64       | -1.73        | 2.00       | 1.99         |
| UNC93A    | unc-93 homolog A (C. elegans)                     | chr6q27              | 0                                                                    | ---                                                                       | -1.47         | -1.65           | 1.14      | -1.49       | -2.23     | 1.25        | 1.41       | 1.35         | 1.93       | 1.57         | -2.03      | -1.08        |
| UNG       | uracil-DNA glycosylase                            | chr12q23-q24.1       | DNA repair                                                           | ---                                                                       | -1.02         | 1.04            | -1.02     | 1.01        | 1.05      | 1.03        | -1.06      | -1.25        | -1.29      | -1.20        | -1.12      | -1.20        |
| UNK       | unkempt homolog (Drosophila)                      | chr17q25.1           | 0                                                                    | ---                                                                       | -1.00         | -1.08           | 1.01      | -1.10       | -1.10     | 1.06        | -1.51      | -1.14        | -1.37      | -1.36        | -1.76      | -2.10        |
| UNKL      | unkempt homolog (Drosophila)                      | chr16p13.3           | protein ubiquitination                                               | ---                                                                       | -1.06         | -1.08           | 1.02      | -1.10       | 1.03      | 1.25        | -1.42      | -1.24        | -1.03      | 1.30         | 1.77       | 1.82         |
| UNKL      | unkempt homolog (Drosophila)                      | chr16p13.3           | protein ubiquitination                                               | ---                                                                       | 1.03          | -1.01           | 1.15      | -1.09       | 1.02      | 1.10        | -1.22      | 1.09         | 1.05       | -1.07        | 1.61       | 1.85         |
| UPB1      | ureidopropionase, beta                            | chr22q11.2           | pyrimidine nucleobase metabolic process                              | ---                                                                       | 1.50          | 1.52            | 1.39      | 1.16        | -1.43     | -2.36       | -2.54      | -1.32        | -1.35      | 1.42         | -2.83      | -2.22        |
| UPF1      | UPF1 regulator of nonsense-mediated decay         | chr19p13.2-p13.11    | nuclear-transcribed mRNA catabolic process                           | ---                                                                       | -1.01         | -1.13           | 1.06      | -1.26       | -1.07     | -1.00       | 1.06       | 1.15         | 1.29       | 1.35         | 1.68       | 1.68         |
| UPF3A     | UPF3 regulator of nonsense-mediated decay         | chr13q34             | nuclear-transcribed mRNA catabolic process                           | ---                                                                       | 1.20          | 1.17            | 1.30      | 1.17        | 1.11      | 1.08        | 1.01       | 1.03         | -1.33      | -1.27        | -1.35      | -1.24        |
| UPF3A     | UPF3 regulator of nonsense-mediated decay         | chr13q34             | nuclear-transcribed mRNA catabolic process                           | ---                                                                       | -1.23         | -1.06           | 1.02      | -1.03       | 1.03      | -1.06       | -1.01      | 1.04         | -1.60      | -1.65        | -1.80      | -1.64        |
| UPF3A     | UPF3 regulator of nonsense-mediated decay         | chr13q34             | nuclear-transcribed mRNA catabolic process                           | ---                                                                       | 1.11          | 1.18            | -1.11     | -1.11       | -1.07     | 1.03        | -1.06      | -1.04        | -1.19      | -1.06        | -1.22      | -1.25        |
| UPK1A     | uropod protein 1A                                 | chr19q13.13          | epithelial cell differentiation                                      | ---                                                                       | 1.07          | -1.48           | -1.03     | -1.02       | -1.68     | -1.17       | 1.15       | 1.27         | 2.63       | 3.12         | 1.50       | 1.70         |
| UPK2      | uropod protein 2                                  | chr11q23             | multicellular organismal development                                 | ---                                                                       | 1.77          | 1.62            | 1.35      | 1.27        | 1.37      | 1.20        | -1.06      | -1.16        | 1.64       | 1.88         | 1.75       | 2.02         |
| UPK3B     | uropod protein 3B                                 | chr7q11.2            | negative regulation of gene expression                               | ---                                                                       | -1.19         | -1.02           | -1.31     | -1.28       | -1.10     | -1.03       | 1.41       | 1.37         | 1.40       | 1.55         | 1.09       | 1.72         |
| UPP1      | uridine phosphorylase 1                           | chr7p12.3            | nucleobase-containing compound metabolic process                     | ---                                                                       | 1.06          | -1.11           | 1.07      | 1.23        | 1.12      | -1.08       | 1.17       | 1.13         | 1.80       | 1.37         | 1.85       | 1.68         |
| UQCC      | ubiquinol-cytochrome c reductase                  | chr20q11.22          | 0                                                                    | ---                                                                       | -1.59         | 1.03            | 1.73      | 1.56        | -1.08     | 1.32        | -1.53      | -1.33        | -1.96      | -2.17        | -4.16      | -2.66        |
| UQCC      | ubiquinol-cytochrome c reductase                  | chr20q11.22          | 0                                                                    | ---                                                                       | -1.06         | -1.09           | 1.00      | -1.10       | 1.15      | 1.02        | 1.09       | 1.12         | -1.05      | -1.02        | 1.30       | 1.54         |
| UQCC      | ubiquinol-cytochrome c reductase                  | chr20q11.22          | 0                                                                    | ---                                                                       | 1.10          | 1.07            | 1.06      | 1.18        | 1.17      | 1.25        | 1.07       | -1.17        | -1.51      | -1.72        | -1.38      | -1.93        |
| UQCR10    | ubiquinol-cytochrome c reductase                  | chr22q12.2           | mitochondrial electron transport, ubiquinol to ubiquinone            | Electron_Transport_Chain // GenMAPP                                       | -1.05         | -1.10           | 1.06      | 1.15        | 1.00      | 1.12        | -1.46      | -1.15        | -1.44      | -1.56        | -1.60      | -1.57        |
| UQCRB     | ubiquinol-cytochrome c reductase                  | chr8q22              | oxidative phosphorylation                                            | Electron_Transport_Chain // GenMAPP                                       | -1.02         | 1.03            | 1.03      | 1.08        | -1.04     | -1.03       | 1.11       | 1.10         | 1.24       | 1.13         | -1.04      | -1.04        |
| UQCRB     | ubiquinol-cytochrome c reductase                  | chr8q22              | oxidative phosphorylation                                            | Electron_Transport_Chain // GenMAPP                                       | 1.20          | 1.03            | -1.07     | -1.07       | -1.51     | -1.26       | -1.03      | 1.06         | -1.65      | -2.33        | -3.30      | -2.68        |
| UQCRB     | ubiquinol-cytochrome c reductase                  | chr8q22              | oxidative phosphorylation                                            | Electron_Transport_Chain // GenMAPP                                       | -1.01         | -1.01           | 1.04      | 1.19        | -1.09     | 1.07        | -1.07      | -1.20        | -1.24      | -1.11        | -1.55      | -1.54        |
| UQCRB     | ubiquinol-cytochrome c reductase                  | chr8q22              | oxidative phosphorylation                                            | Electron_Transport_Chain // GenMAPP                                       | -1.14         | -1.02           | 1.00      | -1.02       | 1.07      | 1.08        | 1.10       | 1.06         | 1.17       | 1.07         | -1.04      | -1.05        |
| UQCRC1    | ubiquinol-cytochrome c reductase                  | chr3p21.3            | oxidative phosphorylation                                            | Electron_Transport_Chain // GenMAPP                                       | -1.10         | -1.16           | 1.01      | 1.01        | 1.02      | -1.04       | 1.20       | 1.08         | 1.44       | 1.30         | 1.15       | 1.36         |
| UQCRCF1   | ubiquinol-cytochrome c reductase                  | chr19q12             | response to hormone stimulus                                         | Electron_Transport_Chain // GenMAPP                                       | -1.05         | -1.01           | -1.02     | 1.00        | -1.00     | -1.05       | 1.03       | -1.05        | 1.24       | 1.12         | 1.16       | 1.16         |
| URB1      | URB1 ribosome biogenesis                          | chr21q22.11          | 0                                                                    | ---                                                                       | 1.45          | 1.27            | 1.29      | -1.14       | -1.20     | -1.05       | 1.00       | 1.04         | 2.57       | 2.32         | 1.54       | 1.54         |
| URB1      | URB1 ribosome biogenesis                          | chr21q22.11          | 0                                                                    | ---                                                                       | 1.05          | 1.05            | 1.01      | 1.01        | 1.06      | 1.07        | 1.01       | 1.03         | -1.20      | -1.13        | -1.55      | -1.45        |
| URGCP     | upregulator of cell proliferation                 | chr7p13              | cell cycle                                                           | ---                                                                       | 1.02          | 1.02            | 1.01      | 1.00        | -1.11     | -1.17       | -1.13      | 1.17         | 1.22       | 1.20         | 1.60       | 1.78         |
| URI1      | URI1, prefolin-like chaperone                     | chr19q12             | negative regulation of transcription from RNA polymerase II promoter | ---                                                                       | -1.05         | -1.11           | 1.05      | 1.07        | 1.04      | -1.11       | -1.11      | -1.06        | 1.22       | 1.02         | 1.31       | 1.37         |
| UROCI     | urocanate hydratase 1                             | chr3q21.3            | histidine metabolic process                                          | ---                                                                       | 1.89          | 2.23            | -1.33     | -1.42       | -1.37     | -1.61       | 1.26       | -1.20        | 1.27       | 1.36         | 1.18       | 1.46         |
| UROD      | uroporphyrinogen decarboxylase                    | chr1p34              | liver development                                                    | Heme_Biosynthesis // GenMAPP                                              | -1.11         | -1.13           | 1.08      | 1.02        | 1.06      | -1.08       | 1.07       | 1.07         | -1.16      | -1.21        | -1.49      | -1.39        |
| UROD      | uroporphyrinogen decarboxylase                    | chr1p34              | liver development                                                    | Heme_Biosynthesis // GenMAPP                                              | 1.06          | 1.05            | -1.04     | 1.01        | -1.00     | -1.02       | 1.05       | 1.04         | -1.08      | -1.09        | -1.38      | -1.38        |
| UROS      | uroporphyrinogen III synthase                     | chr10q25.2-q26.3     | porphyrin-containing compound metabolic process                      | Heme_Biosynthesis // GenMAPP                                              | -1.11         | -1.06           | 1.16      | 1.06        | -1.03     | -1.01       | -1.11      | 1.05         | -2.05      | -1.75        | -3.96      | -2.90        |
| UROS      | uroporphyrinogen III synthase                     | chr10q25.2-q26.3     | porphyrin-containing compound metabolic process                      | Heme_Biosynthesis // GenMAPP                                              | -1.03         | -1.06           | -1.02     | 1.06        | 1.04      | -1.04       | 1.09       | 1.13         | -1.35      | -1.45        | -2.71      | -2.46        |
| USB1      | U6 snRNA biogenesis 1                             | chr16q21             | mRNA processing                                                      | ---                                                                       | -1.01         | -1.04           | -1.00     | -1.07       | 1.01      | 1.06        | -1.10      | -1.06        | 1.22       | 1.24         | -1.21      | -1.43        |
| USB1      | U6 snRNA biogenesis 1                             | chr16q21             | mRNA processing                                                      | ---                                                                       | -1.08         | -1.10           | 1.16      | -1.04       | -1.08     | -1.07       | -1.08      | 1.07         | 1.54       | 1.18         | -1.37      | -1.48        |
| USE1      | unconventional SNARE in vesicle trafficking       | chr19p13.11          | transport                                                            | ---                                                                       | 1.01          | 1.02            | -1.06     | -1.04       | 1.04      | -1.09       | 1.36       | 1.15         | 1.47       | 1.25         | 1.66       | 1.63         |
| USE1      | unconventional SNARE in vesicle trafficking       | chr19p13.11          | transport                                                            | ---                                                                       | -1.10         | -1.16           | -1.08     | -1.35       | 1.15      | -1.02       | 1.37       | -1.11        | 1.51       | 1.36         | 1.78       | 1.85         |
| USF2      | upstream transcription factor 2                   | chr19q13             | regulation of transcription from RNA polymerase II promoter          | ---                                                                       | 1.10          | 1.05            | 1.02      | 1.05        | -1.05     | 1.03        | 1.06       | -1.04        | -1.11      | -1.15        | -1.21      | -1.30        |
| USH1C     | Usher syndrome 1C (autosomal recessive)           | chr11p14.3           | G2                                                                   | ---                                                                       | -1.12         | -1.40           | 1.37      | 1.24        | 1.25      | 1.40        | 1.22       | 1.11         | -1.41      | -1.29        | -2.56      | -1.76        |
| USH1C     | Usher syndrome 1C (autosomal recessive)           | chr11p14.3           | G2                                                                   | ---                                                                       | -1.14         | -1.06           | 1.15      | 1.35        | -1.27     | -1.14       | -1.15      | -1.09        | -1.05      | -1.04        | -1.42      | -1.14        |
| USO1      | USO1 vesicle transport factor                     | chr4q21.1            | mitotic cell cycle                                                   | ---                                                                       | 1.10          | 1.11            | 1.01      | -1.03       | -1.02     | -1.04       | -1.00      | -1.07        | 1.05       | 1.01         | 1.34       | 1.24         |
| USO1      | USO1 vesicle transport factor                     | chr4q21.1            | mitotic cell cycle                                                   | ---                                                                       | -1.17         | -1.30           | 1.11      | 1.03        | 1.26      | 1.05        | 1.16       | 1.12         | 1.05       | 1.16         | 1.53       | 1.51         |
| USP1      | ubiquitin specific peptidase                      | chr1p31.3            | DNA repair                                                           | ---                                                                       | 1.09          | 1.03            | -1.06     | 1.00        | -1.06     | -1.09       | -1.00      | -1.10        | -1.02      | -1.07        | -1.09      | -1.19        |
| USP11     | ubiquitin specific peptidase                      | chrXp11.23           | proteolysis                                                          | ---                                                                       | -1.01         | -1.00           | 1.03      | 1.06        | 1.08      | 1.00        | 1.12       | -1.01        | 1.06       | -1.03        | -1.42      | -1.28        |
| USP12     | ubiquitin specific peptidase                      | chr13q12.13          | cellular protein modification process                                | ---                                                                       | -1.01         | 1.13            | 1.12      | 1.18        | -1.15     | -1.05       | -1.26      | 1.05         | -1.03      | 1.10         | 1.26       | 1.16         |

| ID         | Gene Title                                     | Chromosomal Location | 1st Gene Ontology Biological Process      | Pathway | A2497 30 mins | A2497P' 30 mins | A2497 2 h | A2497P' 2 h | A2497 4 h | A2497P' 4 h | A2497 24 h | A2497P' 24 h | A2497 48 h | A2497P' 48 h | A2497 72 h | A2497P' 72 h |
|------------|------------------------------------------------|----------------------|-------------------------------------------|---------|---------------|-----------------|-----------|-------------|-----------|-------------|------------|--------------|------------|--------------|------------|--------------|
| USP13      | ubiquitin specific peptidase                   | chr3q26.2-q26.3      | regulation of transcription, DNA-depend   | ---     | -1.01         | 1.02            | 1.03      | -1.02       | -1.10     | -1.03       | -1.13      | -1.13        | -1.29      | -1.26        | -1.22      | -1.34        |
| USP13      | ubiquitin specific peptidase                   | chr3q26.2-q26.3      | regulation of transcription, DNA-depend   | ---     | -1.02         | -1.01           | 1.10      | 1.09        | -1.02     | -1.05       | 1.07       | 1.01         | -1.21      | -1.19        | 1.10       | 1.33         |
| USP14      | ubiquitin specific peptidase                   | chr18p11.32          | proteolysis                               | ---     | -1.04         | 1.01            | -1.07     | 1.03        | -1.07     | -1.05       | -1.07      | -1.04        | 1.03       | 1.05         | 1.15       | 1.11         |
| USP14      | ubiquitin specific peptidase                   | chr18p11.32          | proteolysis                               | ---     | 1.02          | 1.05            | 1.06      | 1.05        | 1.08      | 1.01        | -1.18      | -1.13        | -1.06      | -1.10        | 1.12       | 1.14         |
| USP15      | ubiquitin specific peptidase                   | chr12q14             | proteolysis                               | ---     | 1.01          | -1.00           | 1.05      | 1.12        | 1.09      | 1.03        | 1.17       | 1.11         | 1.11       | 1.08         | 1.69       | 1.72         |
| USP15      | ubiquitin specific peptidase                   | chr12q14             | proteolysis                               | ---     | 1.05          | 1.14            | 1.19      | -1.01       | 1.32      | 1.23        | -1.10      | -1.07        | -1.60      | -1.38        | 1.25       | -1.00        |
| USP16      | ubiquitin specific peptidase                   | chr21q22.11          | transcription, DNA-dependent              | ---     | -1.04         | -1.03           | -1.02     | -1.02       | 1.05      | 1.00        | 1.03       | 1.03         | -1.24      | -1.25        | -1.03      | -1.05        |
| USP18      | ubiquitin specific peptidase                   | chr22q11.21          | proteolysis                               | ---     | 1.06          | -1.06           | 1.23      | 1.10        | -1.04     | -1.10       | 1.47       | 1.17         | 1.24       | 1.17         | 1.35       | 1.46         |
| USP2       | ubiquitin specific peptidase                   | chr11q23.3           | negative regulation of transcription from | ---     | 1.05          | 1.17            | 1.08      | 1.14        | 1.18      | 1.08        | 1.01       | 1.12         | -1.54      | -1.27        | -1.00      | -1.04        |
| USP21      | ubiquitin specific peptidase                   | chr1q22              | transcription, DNA-dependent              | ---     | 1.05          | -1.06           | 1.08      | -1.00       | 1.08      | 1.11        | 1.01       | 1.05         | -1.21      | -1.37        | -1.29      | 1.02         |
| USP21      | ubiquitin specific peptidase                   | chr1q22              | transcription, DNA-dependent              | ---     | -1.07         | 1.09            | -1.01     | 1.06        | 1.09      | -1.02       | -1.03      | -1.05        | -1.49      | -1.45        | -1.40      | -1.10        |
| USP22      | ubiquitin specific peptidase                   | chr17p11.2           | transcription, DNA-dependent              | ---     | -1.04         | -1.06           | -1.05     | -1.04       | -1.10     | -1.04       | -1.09      | -1.05        | -1.12      | 1.01         | -1.05      | 1.02         |
| USP24      | ubiquitin specific peptidase                   | chr1p32.3            | proteolysis                               | ---     | 1.01          | -1.19           | -1.01     | 1.09        | -1.09     | -1.03       | 1.12       | 1.20         | 1.09       | -1.07        | 1.23       | 1.05         |
| USP24      | ubiquitin specific peptidase                   | chr1p32.3            | proteolysis                               | ---     | -1.09         | -1.06           | 1.13      | -1.04       | 1.00      | -1.13       | -1.04      | 1.04         | -1.25      | -1.18        | -1.21      | -1.15        |
| USP25      | ubiquitin specific peptidase                   | chr21q11.2           | cellular protein modification process     | ---     | 1.01          | -1.05           | 1.00      | 1.12        | -1.04     | -1.00       | -1.28      | -1.18        | -1.89      | -1.37        | -1.68      | -1.57        |
| USP28      | ubiquitin specific peptidase                   | chr11q23             | DNA damage checkpoint                     | ---     | 1.07          | 1.03            | -1.11     | -1.03       | 1.02      | 1.21        | -1.35      | -1.14        | -1.01      | 1.31         | 1.09       | 1.15         |
| USP3       | ubiquitin specific peptidase                   | chr15q22.3           | mitotic cell cycle                        | ---     | -1.07         | -1.06           | 1.01      | 1.04        | -1.02     | -1.02       | 1.09       | 1.04         | 1.08       | 1.10         | 1.23       | 1.19         |
| USP3       | ubiquitin specific peptidase                   | chr15q22.3           | mitotic cell cycle                        | ---     | 1.04          | -1.03           | 1.07      | -1.01       | -1.03     | -1.09       | -1.21      | 1.10         | -1.45      | -1.45        | -1.63      | -1.52        |
| USP30      | ubiquitin specific peptidase                   | chr12q24.11          | proteolysis                               | ---     | 1.11          | -1.04           | 1.04      | 1.28        | -1.28     | -1.04       | -1.15      | -1.10        | -1.42      | -1.04        | -1.27      | -1.02        |
| USP31      | ubiquitin specific peptidase                   | chr16p12.2           | proteolysis                               | ---     | 1.23          | 1.17            | 1.11      | -1.03       | 1.04      | 1.05        | -1.09      | -1.08        | -1.52      | -1.60        | -1.32      | -1.40        |
| USP32      | ubiquitin specific peptidase                   | chr17q23.3           | proteolysis                               | ---     | 1.03          | -1.06           | 1.03      | 1.18        | -1.06     | -1.10       | 1.45       | 1.25         | 1.69       | 1.47         | 1.64       | 1.80         |
| USP32P2    | ubiquitin specific peptidase                   | chr17p11.2           | 0                                         | ---     | 1.25          | 1.01            | -1.09     | 1.18        | 1.02      | 1.29        | -1.45      | -1.08        | -1.45      | -1.16        | -1.37      | -1.38        |
| USP33      | ubiquitin specific peptidase                   | chr1p31.1            | proteolysis                               | ---     | 1.03          | -1.09           | -1.01     | 1.02        | -1.08     | -1.04       | -1.13      | -1.07        | 1.16       | 1.21         | 1.06       | 1.17         |
| USP33      | ubiquitin specific peptidase                   | chr1p31.1            | proteolysis                               | ---     | -1.03         | -1.03           | -1.02     | 1.00        | -1.06     | 1.02        | -1.15      | -1.11        | -1.45      | -1.28        | -1.27      | -1.32        |
| USP34      | ubiquitin specific peptidase                   | chr2p15              | proteolysis                               | ---     | 1.34          | 1.48            | 1.15      | 1.20        | 1.08      | -1.07       | -1.68      | -1.15        | -2.28      | -1.65        | -1.71      | -1.23        |
| USP34      | ubiquitin specific peptidase                   | chr2p15              | proteolysis                               | ---     | 1.22          | -1.01           | -1.04     | -1.09       | 1.26      | 1.04        | -1.07      | 1.01         | -1.39      | -1.68        | -1.00      | -1.20        |
| USP34      | ubiquitin specific peptidase                   | chr2p15              | proteolysis                               | ---     | -1.06         | -1.07           | -1.00     | 1.01        | -1.01     | 1.06        | -1.06      | 1.01         | -1.65      | -1.36        | -1.35      | -1.40        |
| USP34      | ubiquitin specific peptidase                   | chr2p15              | proteolysis                               | ---     | 1.05          | 1.01            | 1.18      | 1.39        | 1.06      | 1.14        | -1.03      | -1.21        | -4.38      | -6.60        | -8.47      | -6.59        |
| USP34      | ubiquitin specific peptidase                   | chr2p15              | proteolysis                               | ---     | -1.02         | -1.07           | 1.20      | 1.07        | 1.04      | 1.11        | -1.27      | -1.23        | -1.63      | -1.37        | -1.40      | -1.50        |
| USP36      | ubiquitin specific peptidase                   | chr17q25.3           | proteolysis                               | ---     | 1.15          | -1.16           | 1.16      | 1.21        | 1.02      | 1.08        | 1.36       | 1.26         | -1.11      | -1.28        | -1.28      | -1.45        |
| USP36      | ubiquitin specific peptidase                   | chr17q25.3           | proteolysis                               | ---     | -1.18         | -1.22           | -1.01     | 1.02        | -1.00     | 1.03        | 1.03       | 1.05         | 1.14       | 1.21         | 1.08       | 1.15         |
| USP36      | ubiquitin specific peptidase                   | chr17q25.3           | proteolysis                               | ---     | 1.08          | 1.21            | 1.15      | 1.12        | 1.11      | 1.10        | 1.12       | 1.19         | 1.32       | 1.11         | 1.62       | 1.58         |
| USP36      | ubiquitin specific peptidase                   | chr17q25.3           | proteolysis                               | ---     | -1.01         | 1.04            | -1.03     | 1.03        | 1.19      | -1.06       | 1.08       | -1.11        | 1.47       | 1.03         | 1.15       | 1.17         |
| USP38      | ubiquitin specific peptidase                   | ---                  | proteolysis                               | ---     | 1.11          | -1.10           | 1.00      | -1.32       | 1.31      | 1.48        | 1.11       | 1.04         | -1.64      | -1.42        | -1.96      | -1.81        |
| USP40      | ubiquitin specific peptidase                   | chr2q37.1            | proteolysis                               | ---     | 1.09          | -1.05           | 1.01      | 1.08        | 1.17      | 1.17        | -1.25      | -1.44        | -1.94      | -1.77        | -1.46      | -1.65        |
| USP40      | ubiquitin specific peptidase                   | chr2q37.1            | proteolysis                               | ---     | 1.12          | -1.01           | 1.02      | 1.04        | -1.03     | -1.09       | -1.23      | -1.22        | -1.48      | -1.34        | 1.04       | 1.08         |
| USP42      | ubiquitin specific peptidase                   | chr7p22.1            | proteolysis                               | ---     | -1.03         | -1.04           | 1.04      | -1.12       | 1.06      | -1.01       | -1.29      | -1.12        | -1.40      | -1.41        | 1.02       | -1.18        |
| USP43      | ubiquitin specific peptidase                   | chr17p13.1           | proteolysis                               | ---     | 1.25          | 1.14            | 1.13      | -1.01       | 1.09      | 1.12        | 1.01       | 1.16         | -1.56      | -1.12        | -1.68      | -1.81        |
| USP45      | ubiquitin specific peptidase                   | chr6q16.2            | proteolysis                               | ---     | 1.64          | 1.05            | -1.14     | -1.06       | -1.12     | 1.29        | -1.82      | -1.16        | -1.39      | -1.41        | -1.50      | -1.84        |
| USP45      | ubiquitin specific peptidase                   | chr6q16.2            | proteolysis                               | ---     | 1.09          | -1.18           | -1.04     | 1.21        | 1.13      | 1.28        | 1.08       | 1.01         | -1.04      | -1.06        | 1.30       | 1.38         |
| USP46      | ubiquitin specific peptidase                   | chr4q12              | behavioral fear response                  | ---     | 1.16          | 1.09            | 1.09      | 1.08        | -1.12     | 1.16        | -1.14      | 1.01         | -1.48      | -1.52        | -1.42      | -1.71        |
| USP46      | ubiquitin specific peptidase                   | chr4q12              | behavioral fear response                  | ---     | 1.16          | 1.20            | 1.39      | 1.18        | 1.03      | 1.05        | -1.24      | -1.08        | -1.72      | -1.48        | -1.19      | -1.41        |
| USP47      | ubiquitin specific peptidase                   | chr11p15.3           | DNA repair                                | ---     | -1.12         | -1.13           | 1.08      | 1.04        | 1.15      | -1.03       | -1.15      | -1.00        | 1.03       | 1.02         | -1.34      | 1.02         |
| USP47      | ubiquitin specific peptidase                   | chr11p15.3           | DNA repair                                | ---     | -1.04         | 1.04            | 1.06      | 1.12        | 1.03      | -1.07       | -1.03      | 1.14         | -1.39      | -1.48        | -1.46      | -1.31        |
| USP47      | ubiquitin specific peptidase                   | chr11p15.3           | DNA repair                                | ---     | -1.10         | -1.09           | 1.04      | -1.08       | 1.13      | 1.07        | -1.10      | 1.02         | -1.39      | -1.35        | -1.56      | -1.41        |
| USP47      | ubiquitin specific peptidase                   | chr11p15.3           | DNA repair                                | ---     | -1.07         | -1.08           | 1.01      | 1.00        | 1.05      | 1.11        | 1.08       | 1.17         | -1.49      | -1.32        | -1.35      | -1.28        |
| USP47      | ubiquitin specific peptidase                   | chr11p15.3           | DNA repair                                | ---     | -1.03         | 1.01            | 1.13      | 1.15        | 1.09      | 1.02        | -1.15      | -1.08        | -1.78      | -1.63        | -1.45      | -1.48        |
| USP48      | ubiquitin specific peptidase                   | chr1p36.12           | proteolysis                               | ---     | -1.02         | -1.06           | 1.07      | 1.11        | 1.02      | -1.01       | -1.01      | 1.07         | -1.18      | -1.14        | -1.34      | -1.18        |
| USP48      | ubiquitin specific peptidase                   | chr1p36.12           | proteolysis                               | ---     | -1.14         | -1.17           | 1.08      | -1.11       | 1.02      | 1.17        | 1.18       | 1.25         | -1.41      | -1.22        | -1.60      | -1.74        |
| USP49      | ubiquitin specific peptidase                   | chr6p21              | mRNA splicing, via spliceosome            | ---     | -1.04         | 1.31            | 1.02      | 1.13        | 1.07      | 1.37        | 1.04       | 1.47         | -1.50      | -1.36        | -1.36      | -1.98        |
| USP49      | ubiquitin specific peptidase                   | chr6p21              | mRNA splicing, via spliceosome            | ---     | 1.04          | -1.16           | 1.15      | 1.28        | 1.54      | 1.40        | 1.22       | -1.33        | -1.39      | -1.37        | -1.80      | -1.59        |
| USP49      | ubiquitin specific peptidase                   | chr6p21              | mRNA splicing, via spliceosome            | ---     | -1.08         | 1.05            | 1.24      | -1.02       | -1.12     | 1.02        | -1.05      | -1.15        | -1.98      | -2.35        | -1.52      | -1.44        |
| USP51      | ubiquitin specific peptidase                   | chrXp11.21           | proteolysis                               | ---     | 1.08          | -1.15           | -1.05     | -1.32       | -1.16     | 1.23        | -1.42      | -1.01        | -2.15      | -1.52        | -1.47      | -1.29        |
| USP53      | ubiquitin specific peptidase                   | chr4q26              | ubiquitin-dependent protein catabolic pro | ---     | 1.24          | 1.32            | 1.08      | -1.05       | -1.19     | 1.03        | -1.20      | -1.03        | 1.02       | 1.08         | 1.54       | 1.13         |
| USP53      | ubiquitin specific peptidase                   | chr4q26              | ubiquitin-dependent protein catabolic pro | ---     | 1.56          | 1.40            | 1.15      | 1.03        | -1.24     | -1.01       | 1.05       | 1.07         | 1.10       | 1.10         | 1.85       | 1.20         |
| USP53      | ubiquitin specific peptidase                   | chr4q26              | ubiquitin-dependent protein catabolic pro | ---     | 1.29          | 1.16            | 1.03      | -1.01       | 1.24      | 1.12        | -1.07      | 1.12         | 1.33       | 1.05         | 1.68       | 1.57         |
| USP6NL-IT1 | USP6NL intronic transcript                     | ---                  | Golgi organization                        | ---     | -1.12         | 1.08            | 1.14      | 1.10        | -1.10     | 1.15        | 1.21       | 1.05         | -1.41      | -1.31        | -1.87      | -2.09        |
| USP7       | ubiquitin specific peptidase                   | chr16p13.3           | DNA repair                                | ---     | 1.08          | 1.01            | 1.01      | 1.03        | -1.11     | -1.00       | -1.39      | -1.17        | -1.28      | -1.20        | -1.49      | -1.24        |
| USP7       | ubiquitin specific peptidase                   | chr16p13.3           | DNA repair                                | ---     | 1.00          | -1.02           | -1.00     | 1.00        | 1.04      | -1.06       | 1.01       | 1.05         | 1.04       | -1.07        | 1.26       | 1.23         |
| USP7       | ubiquitin specific peptidase                   | chr16p13.3           | transcription-coupled nucleotide-excision | ---     | -1.19         | -1.19           | 1.10      | 1.00        | 1.04      | 1.02        | -1.12      | -1.07        | -1.00      | -1.08        | -1.17      | -1.05        |
| USP9X      | ubiquitin specific peptidase                   | chrXp11.4            | negative regulation of transcription from | ---     | 1.00          | 1.03            | 1.07      | -1.01       | 1.06      | -1.16       | -1.03      | 1.09         | -1.99      | -2.00        | -2.12      | -1.69        |
| USP9X      | ubiquitin specific peptidase                   | chrXp11.4            | negative regulation of transcription from | ---     | -1.05         | -1.02           | -1.04     | -1.01       | -1.05     | -1.04       | -1.04      | -1.05        | -1.43      | -1.18        | -1.42      | -1.39        |
| UST        | uronyl-2-sulfotransferase                      | chr6q25.1            | carbohydrate metabolic process            | ---     | -1.09         | -1.06           | 1.25      | 1.27        | 1.11      | 1.04        | -1.11      | -1.25        | 1.46       | 1.37         | 1.47       | 1.64         |
| UTP11L     | UTP11-like, U3 small nucleolar rRNA processing | chr1p34.3            | rRNA processing                           | ---     | -1.05         | -1.00           | 1.01      | -1.02       | 1.06      | 1.02        | -1.11      | -1.09        | 1.10       | 1.02         | 1.18       | 1.14         |
| UTP14A     | UTP14, U3 small nucleolar rRNA processing      | chrXq26.1            | rRNA processing                           | ---     | -1.08         | -1.08           | -1.00     | 1.03        | 1.10      | -1.00       | 1.11       | 1.05         | -1.45      | -1.54        | -1.76      | -1.76        |
| UTP14A     | UTP14, U3 small nucleolar rRNA processing      | chrXq26.1            | rRNA processing                           | ---     | 1.05          | -1.21           | 1.15      | 1.15        | -1.26     | 1.02        | -1.28      | 1.02         | -1.62      | -1.62        | -1.67      | -1.61        |

| ID      | Gene Title                   | Chromosomal Location | 1st Gene Ontology Biological Process       | Pathway                                   | A2497 30 mins | A2497P' 30 mins | A2497 2 h | A2497P' 2 h | A2497 4 h | A2497P' 4 h | A2497 24 h | A2497P' 24 h | A2497 48 h | A2497P' 48 h | A2497 72 h | A2497P' 72 h |
|---------|------------------------------|----------------------|--------------------------------------------|-------------------------------------------|---------------|-----------------|-----------|-------------|-----------|-------------|------------|--------------|------------|--------------|------------|--------------|
| UTP14A  | UTP14, U3 small nucleolar    | chr13q14.2           | rRNA processing                            | ---                                       | -1.10         | 1.00            | 1.09      | -1.04       | 1.06      | -1.04       | 1.03       | 1.08         | -1.68      | -1.59        | -1.80      | -1.56        |
| UTP15   | UTP15, U3 small nucleolar    | chr5q13.2            | rRNA processing                            | ---                                       | -1.21         | -1.11           | -1.01     | 1.10        | -1.14     | -1.10       | -1.29      | 1.08         | 1.07       | 1.05         | 1.54       | 1.51         |
| UTP15   | UTP15, U3 small nucleolar    | chr5q13.2            | rRNA processing                            | ---                                       | 1.43          | 1.25            | 1.03      | 1.06        | -1.02     | -1.02       | -2.13      | -1.88        | -1.67      | -2.03        | 1.13       | 1.03         |
| UTP18   | UTP18 small subunit (SSU)    | chr17q21.33          | rRNA processing                            | ---                                       | 1.11          | -1.01           | -1.05     | 1.19        | -1.14     | -1.29       | 1.28       | 1.06         | -1.71      | -1.45        | 1.39       | 1.12         |
| UTP20   | UTP20, small subunit (SSU)   | chr12q23             | endonucleolytic cleavage in ITS1 to sepa   | ---                                       | -1.09         | -1.06           | 1.10      | 1.02        | 1.11      | 1.03        | -1.09      | -1.17        | -1.44      | -1.72        | -1.34      | -1.50        |
| UTP23   | UTP23, small subunit (SSU)   | chr8q24.11           | rRNA processing                            | ---                                       | -1.04         | 1.09            | 1.12      | -1.10       | -1.04     | 1.02        | -1.00      | 1.10         | -1.67      | -1.35        | 1.04       | -1.14        |
| UTP23   | UTP23, small subunit (SSU)   | chr8q24.11           | rRNA processing                            | ---                                       | 1.03          | 1.03            | 1.01      | -1.09       | -1.08     | -1.02       | -1.27      | -1.16        | -1.56      | -1.33        | -1.06      | -1.12        |
| UTP6    | UTP6, small subunit (SSU)    | chr17q11.2           | rRNA processing                            | ---                                       | 1.06          | 1.09            | -1.00     | -1.07       | -1.02     | -1.03       | -1.04      | -1.11        | 1.04       | -1.12        | 1.30       | 1.24         |
| UTRN    | utrophin                     | chr6q24              | positive regulation of cell-matrix adhesio | ---                                       | 1.04          | 1.07            | 1.03      | -1.00       | 1.16      | 1.02        | 1.20       | 1.11         | -1.58      | -1.54        | -1.47      | -1.48        |
| UVRAG   | UV radiation resistance ass  | chr11q13.5           | DNA repair                                 | ---                                       | 1.06          | 1.03            | 1.00      | 1.12        | 1.04      | -1.02       | 1.23       | 1.15         | 1.29       | 1.17         | 1.16       | 1.09         |
| VAMP1   | vesicle-associated membr     | chr12p               | synaptic transmission                      | ---                                       | 1.14          | -1.06           | 1.08      | 1.39        | -1.04     | 1.07        | -1.11      | -1.15        | -1.00      | 1.02         | -1.66      | -1.13        |
| VAMP2   | vesicle-associated membr     | chr17p13.1           | energy reserve metabolic process           | ---                                       | -1.14         | -1.30           | -1.02     | 1.04        | 1.10      | 1.06        | -1.03      | 1.06         | -1.21      | 1.01         | -1.55      | -1.33        |
| VAMP2   | vesicle-associated membr     | chr17p13.1           | energy reserve metabolic process           | ---                                       | 1.03          | 1.03            | 1.06      | 1.26        | 1.26      | -1.01       | 1.31       | 1.09         | 1.04       | -1.22        | -1.09      | -1.50        |
| VAMP3   | vesicle-associated membr     | chr1p36.23           | positive regulation of receptor recycling  | ---                                       | -1.04         | 1.02            | -1.01     | 1.08        | -1.01     | -1.08       | 1.14       | 1.08         | 1.33       | 1.19         | 1.30       | 1.35         |
| VAMP3   | vesicle-associated membr     | chr1p36.23           | positive regulation of receptor recycling  | ---                                       | -1.07         | -1.05           | 1.07      | 1.03        | -1.21     | -1.15       | 1.14       | -1.12        | 1.07       | 1.20         | 1.74       | 1.71         |
| VAMP4   | vesicle-associated membr     | chr1q24-q25          | vesicle-mediated transport                 | ---                                       | -1.07         | -1.18           | 1.10      | 1.14        | -1.19     | -1.10       | -1.02      | 1.23         | 1.82       | 1.46         | 1.70       | 1.56         |
| VAMP4   | vesicle-associated membr     | chr1q24-q25          | vesicle-mediated transport                 | ---                                       | 1.10          | -1.02           | 1.06      | 1.33        | 1.09      | 1.02        | 1.36       | 1.16         | 1.47       | 1.51         | 1.62       | 1.44         |
| VAMP5   | vesicle-associated membr     | chr2p11.2            | multicellular organismal development       | ---                                       | -1.01         | -1.17           | -1.04     | -1.29       | -1.21     | -1.53       | 1.49       | 1.39         | 1.22       | 1.25         | 1.26       | 1.44         |
| VAMP5   | vesicle-associated membr     | chr2p11.2            | muscle organ development                   | ---                                       | 1.04          | 1.01            | 1.29      | 1.12        | 1.05      | 1.07        | 1.08       | -1.04        | 1.27       | 1.38         | 1.43       | 1.43         |
| VAMP8   | vesicle-associated membr     | chr2p12-p11.2        | autophagic vacuole fusion                  | ---                                       | -1.02         | -1.02           | 1.00      | -1.07       | 1.02      | -1.10       | 1.08       | 1.03         | -1.10      | -1.18        | -1.41      | -1.52        |
| VANGL1  | VANGL planar cell polarit    | chr1p13.1            | multicellular organismal development       | ---                                       | 1.06          | 1.10            | 1.01      | -1.09       | 1.06      | 1.11        | -1.42      | -1.31        | -2.00      | -1.94        | -1.51      | -1.50        |
| VANGL1  | VANGL planar cell polarit    | chr1p13.1            | multicellular organismal development       | ---                                       | 1.10          | -1.04           | 1.12      | 1.09        | -1.03     | 1.04        | -1.41      | -1.12        | -1.58      | -1.42        | -1.11      | -1.22        |
| VANGL2  | VANGL planar cell polarit    | chr1q22-q23          | establishment of planar polarity           | ---                                       | -2.81         | -1.36           | 6.29      | 2.68        | -4.18     | 1.78        | -1.67      | -1.14        | 11.31      | 3.14         | 5.38       | 1.97         |
| VAPA    | VAMP (vesicle-associated     | chr18p11.22          | phospholipid metabolic process             | Circadian_Eercise // GenMAPP              | 1.04          | 1.01            | -1.07     | 1.04        | -1.04     | 1.02        | 1.04       | -1.03        | 1.24       | 1.17         | 1.18       | 1.19         |
| VAPA    | VAMP (vesicle-associated     | chr18p11.22          | phospholipid metabolic process             | Circadian_Eercise // GenMAPP              | 1.07          | 1.13            | -1.17     | 1.06        | 1.03      | -1.08       | 1.26       | 1.30         | -1.16      | -1.50        | -2.26      | -1.50        |
| VAPA    | VAMP (vesicle-associated     | chr18p11.22          | phospholipid metabolic process             | Circadian_Eercise // GenMAPP              | 1.33          | 1.17            | 1.16      | 1.49        | 1.21      | 1.13        | -1.10      | -1.39        | -2.93      | -2.05        | -2.67      | -2.67        |
| VAPB    | VAMP (vesicle-associated     | chr20q13.33          | phospholipid metabolic process             | ---                                       | -1.16         | -1.08           | 1.06      | 1.04        | 1.15      | 1.02        | -1.33      | -1.25        | -1.97      | -2.00        | -2.19      | -1.82        |
| VAPB    | VAMP (vesicle-associated     | chr20q13.33          | phospholipid metabolic process             | ---                                       | -1.08         | -1.08           | -1.06     | -1.02       | 1.00      | 1.05        | -1.04      | -1.27        | -1.21      | 1.19         | 1.26       | 1.26         |
| VAPB    | VAMP (vesicle-associated     | chr20q13.33          | phospholipid metabolic process             | ---                                       | 1.31          | 1.15            | 1.24      | 1.13        | 1.16      | -1.04       | -1.22      | -1.45        | -2.63      | -2.07        | -2.37      | -2.49        |
| VASH1   | vasohibin 1                  | chr14q24.3           | angiogenesis                               | ---                                       | 1.10          | 1.68            | 1.07      | -2.52       | 1.26      | -1.13       | -1.32      | 2.24         | 1.69       | 1.40         | -1.27      | 1.06         |
| VASH1   | vasohibin 1                  | chr14q24.3           | angiogenesis                               | ---                                       | -1.06         | -1.30           | -1.23     | 1.15        | -1.19     | -1.14       | 1.15       | 1.19         | -1.46      | -1.26        | -1.67      | -1.49        |
| VASH2   | vasohibin 2                  | chr1q32.3            | positive regulation of endothelial cell pr | ---                                       | 1.27          | 1.21            | -1.17     | -1.17       | 1.36      | 1.18        | -2.44      | -1.36        | -1.44      | -1.50        | -1.33      | -1.44        |
| VASH2   | vasohibin 2                  | chr1q32.3            | positive regulation of endothelial cell pr | ---                                       | -1.24         | 1.07            | 1.09      | -1.07       | -1.04     | 1.07        | -1.75      | -1.58        | -2.13      | -1.78        | -1.63      | -1.43        |
| VASN    | vasorin                      | chr16p13.3           | cellular response to hypoxia               | ---                                       | 1.34          | 1.20            | -1.08     | -1.21       | -1.21     | 1.15        | 1.67       | 1.38         | 1.21       | 1.18         | 1.54       | 1.65         |
| VAT1    | vesicle amine transport pro  | chr17q21             | negative regulation of mitochondrial fusi  | ---                                       | -1.10         | -1.11           | -1.01     | 1.04        | -1.04     | -1.09       | 1.21       | 1.17         | 1.48       | 1.32         | 1.32       | 1.51         |
| VAV3    | vav 3 guanine nucleotide ex  | chr1p13.3            | angiogenesis                               | Integrin-mediated_cell_adhesion_KEGG // C | -1.10         | -1.04           | 1.13      | -1.13       | 1.09      | 1.10        | -1.68      | -1.11        | -3.33      | -1.95        | -2.83      | -2.41        |
| VAV3    | vav 3 guanine nucleotide ex  | chr1p13.3            | angiogenesis                               | Integrin-mediated_cell_adhesion_KEGG // C | 1.07          | 1.03            | 1.06      | -1.17       | -1.21     | -1.19       | -1.28      | -1.15        | -2.23      | -1.35        | -2.34      | -2.22        |
| VCAM1   | vascular cell adhesion mole  | chr1p32-p31          | response to hypoxia                        | ---                                       | -4.59         | -4.24           | 1.07      | 1.95        | 3.18      | 1.87        | 1.13       | -1.24        | 1.38       | 2.78         | -1.07      | -7.08        |
| VCAN    | versican                     | chr5q14.3            | carbohydrate metabolic process             | ---                                       | 1.34          | 1.75            | 2.49      | 6.07        | 1.56      | -3.01       | 1.30       | 2.48         | 1.14       | 1.77         | 4.58       | 1.94         |
| VCPIP1  | valosin containing protein   | chr8q13              | proteolysis                                | ---                                       | 1.03          | 1.03            | -1.07     | -1.08       | 1.03      | -1.01       | 1.03       | -1.01        | 2.21       | 1.49         | 2.77       | 2.69         |
| VCPIP1  | valosin containing protein   | chr8q13              | proteolysis                                | ---                                       | 1.24          | 1.17            | 1.17      | -1.15       | 1.16      | 1.22        | -1.48      | -1.16        | -1.30      | -1.14        | 1.12       | 1.07         |
| VCPIP1  | valosin containing protein   | chr8q13              | proteolysis                                | ---                                       | -1.06         | -1.27           | 1.36      | 1.04        | -1.28     | 1.02        | -1.26      | -1.10        | -1.32      | -1.34        | 1.39       | 1.34         |
| VDAC1   | voltage-dependent anion ch   | chr5q31              | behavioral fear response                   | ---                                       | -1.09         | -1.10           | 1.02      | 1.10        | 1.13      | -1.09       | 1.20       | 1.21         | 1.46       | 1.35         | 1.25       | 1.41         |
| VDAC1   | voltage-dependent anion ch   | chr5q31              | behavioral fear response                   | ---                                       | 1.29          | 1.54            | -1.64     | -1.36       | 1.10      | 1.35        | 1.10       | -1.39        | 2.34       | 3.18         | -1.09      | -1.11        |
| VDAC2   | voltage-dependent anion ch   | chr10q22             | transport                                  | ---                                       | -1.07         | -1.00           | -1.04     | -1.03       | -1.04     | -1.06       | 1.09       | 1.01         | 1.34       | 1.31         | 1.27       | 1.34         |
| VDAC3   | voltage-dependent anion ch   | chr8p11.2            | transport                                  | ---                                       | 1.00          | 1.05            | -1.07     | 1.04        | -1.08     | 1.01        | -1.11      | -1.02        | -1.03      | 1.01         | -1.22      | -1.08        |
| VDAC3   | voltage-dependent anion ch   | chr8p11.2            | transport                                  | ---                                       | -1.09         | -1.03           | -1.01     | -1.02       | 1.08      | -1.11       | -1.04      | -1.12        | -1.25      | -1.16        | -1.14      | -1.10        |
| VDAC3   | voltage-dependent anion ch   | chr8p11.2            | transport                                  | ---                                       | 1.07          | 1.07            | 1.00      | 1.05        | 1.04      | 1.04        | -1.31      | -1.40        | -1.66      | -1.12        | -1.21      | -1.11        |
| VDR     | vitamin D (1,25-dihydroxy    | chr12q13.11          | negative regulation of transcription from  | Nuclear_Receptors // GenMAPP // Ovarian   | -1.08         | -1.20           | 1.10      | 1.10        | 1.16      | -1.05       | 1.31       | -1.04        | 1.77       | 1.24         | 1.05       | 1.30         |
| VDR     | vitamin D (1,25-dihydroxy    | chr12q13.11          | negative regulation of transcription from  | Nuclear_Receptors // GenMAPP // Ovarian   | 1.06          | 1.02            | 1.03      | -1.22       | -1.08     | -1.53       | 1.55       | 1.31         | -1.27      | -1.08        | -1.17      | -1.10        |
| VEGFA   | vascular endothelial growth  | chr6p12              | negative regulation of transcription from  | Hypertrophy_model // GenMAPP              | 1.22          | 1.47            | -1.28     | -1.15       | -1.25     | -1.06       | 1.31       | -1.08        | 5.50       | 5.47         | 5.70       | 6.08         |
| VEGFA   | vascular endothelial growth  | chr6p12              | negative regulation of transcription from  | Hypertrophy_model // GenMAPP              | 1.14          | -1.03           | -1.06     | 1.05        | -1.54     | -1.25       | 1.08       | -1.02        | 1.31       | 1.41         | 1.88       | 1.95         |
| VEGFA   | vascular endothelial growth  | chr6p12              | negative regulation of transcription from  | Hypertrophy_model // GenMAPP              | -1.06         | -1.13           | -1.08     | 1.04        | 1.20      | 1.00        | 1.64       | 1.14         | 4.14       | 2.99         | 4.47       | 4.10         |
| VEGFA   | vascular endothelial growth  | chr6p12              | negative regulation of transcription from  | Hypertrophy_model // GenMAPP              | -1.01         | 1.02            | 1.08      | 1.04        | 1.14      | -1.02       | 1.43       | 1.07         | 1.98       | 1.99         | 3.22       | 3.24         |
| VEGFC   | vascular endothelial growth  | chr4q34.3            | angiogenesis                               | ---                                       | -1.18         | -1.03           | 1.17      | -1.04       | 1.34      | -1.30       | 1.40       | 1.04         | 2.55       | 2.05         | 2.23       | 2.17         |
| VENTX   | VENT homeobox                | chr10q26.3           | regulation of transcription, DNA-depend    | ---                                       | -1.03         | 1.01            | -2.12     | -1.29       | -2.10     | -1.26       | -1.77      | -3.27        | -1.91      | 1.05         | -1.29      | -1.96        |
| VEPH1   | ventricular zone expressed   | chr3q24-q25          | 0                                          | ---                                       | 1.05          | -1.11           | -1.30     | 1.03        | 1.17      | -1.11       | -1.18      | -1.13        | 1.17       | 1.08         | -2.97      | -6.72        |
| VEPH1   | ventricular zone expressed   | chr3q24-q25          | 0                                          | ---                                       | 1.04          | 1.06            | 1.12      | 1.08        | -1.02     | -1.04       | -1.05      | 1.14         | -2.32      | -2.08        | -3.99      | -5.64        |
| VEPH1   | ventricular zone expressed   | chr3q24-q25          | 0                                          | ---                                       | -1.14         | -1.37           | 1.08      | 1.16        | 1.11      | -1.13       | 1.12       | 1.09         | -1.50      | -1.45        | -4.08      | -2.42        |
| VEZF1   | vascular endothelial zinc fi | chr17q22             | angiogenesis                               | ---                                       | 1.04          | -1.01           | 1.03      | 1.01        | 1.02      | 1.01        | 1.00       | -1.01        | -1.39      | -1.34        | -1.33      | -1.23        |
| VGLL2   | vestigial like 2 (Drosophila | chr6q22.1            | transcription, DNA-dependent               | ---                                       | -4.64         | -1.48           | -4.34     | -3.06       | -2.66     | 2.84        | -2.02      | -1.27        | -2.29      | 1.33         | 2.75       | 3.66         |
| VGLL3   | vestigial like 3 (Drosophila | chr3p12.1            | transcription, DNA-dependent               | ---                                       | 1.08          | 1.16            | -1.13     | -1.09       | -1.16     | 1.00        | -1.28      | -1.17        | -1.44      | -1.10        | -1.29      | -1.50        |
| VGLL3   | vestigial like 3 (Drosophila | chr3p12.1            | transcription, DNA-dependent               | ---                                       | -1.01         | 1.02            | 1.09      | 1.06        | 1.08      | 1.06        | -1.49      | -1.20        | -2.56      | -1.69        | -3.70      | -3.68        |
| VGLL4   | vestigial like 4 (Drosophila | chr3p25.3            | transcription, DNA-dependent               | ---                                       | 1.05          | 1.10            | -1.03     | -1.06       | -1.01     | 1.00        | -1.07      | -1.07        | -1.34      | -1.12        | -1.20      | -1.22        |
| VIMP    | VCP-interacting membrane     | chr15q26.3           | negative regulation of acute inflammator   | ---                                       | 1.07          | 1.04            | 1.01      | -1.02       | 1.04      | -1.05       | 1.05       | 1.00         | 1.31       | 1.16         | 1.91       | 1.81         |
| VIPAS39 | VPS33B interacting protein   | chr14q24.3-q31       | transcription, DNA-dependent               | ---                                       | -1.03         | 1.01            | 1.13      | 1.05        | 1.11      | 1.01        | 1.19       | -1.02        | -1.44      | -1.52        | -1.20      | -1.33        |

| ID      | Gene Title                    | Chromosomal Location | 1st Gene Ontology Biological Process       | Pathway                               | A2497 30 mins | A2497P' 30 mins | A2497 2 h | A2497P' 2 h | A2497 4 h | A2497P' 4 h | A2497 24 h | A2497P' 24 h | A2497 48 h | A2497P' 48 h | A2497 72 h | A2497P' 72 h |
|---------|-------------------------------|----------------------|--------------------------------------------|---------------------------------------|---------------|-----------------|-----------|-------------|-----------|-------------|------------|--------------|------------|--------------|------------|--------------|
| VIPAS39 | VPS33B interacting protein    | chr14q24.3-q31       | transcription, DNA-dependent               | ---                                   | 1.13          | 1.08            | -1.23     | -1.57       | 1.50      | 1.11        | -1.37      | -1.17        | -1.22      | -1.38        | -1.21      | -1.16        |
| VIPR1   | vasoactive intestinal peptide | chr3p22              | muscle contraction                         | GPCRDB_Class_B_Secretin-like // GenMA | 1.30          | 1.31            | -1.01     | 1.25        | -1.11     | -1.25       | -1.05      | 1.01         | -1.71      | -1.60        | -2.23      | -2.89        |
| VIPR2   | vasoactive intestinal peptide | chr7q36.3            | signal transduction                        | GPCRDB_Class_B_Secretin-like // GenMA | -1.04         | 1.05            | -1.01     | 1.04        | 1.19      | -1.02       | 1.06       | -1.02        | -1.59      | -1.93        | -3.42      | -2.80        |
| VIPR2   | vasoactive intestinal peptide | chr7q36.3            | signal transduction                        | GPCRDB_Class_B_Secretin-like // GenMA | -1.17         | -1.12           | 1.11      | 1.20        | 1.22      | -1.05       | 1.21       | 1.11         | -4.21      | -4.48        | -6.10      | -4.96        |
| VIPR2   | vasoactive intestinal peptide | chr7q36.3            | signal transduction                        | GPCRDB_Class_B_Secretin-like // GenMA | 1.12          | -1.04           | 1.40      | 1.56        | 1.10      | -1.11       | -1.01      | -1.02        | -1.94      | -2.23        | -4.72      | -4.60        |
| VIT     | vitron                        | chr2p22.2            | positive regulation of cell-substrate adhe | ---                                   | -1.29         | -2.06           | 1.61      | 1.60        | -1.56     | 2.80        | -1.22      | -1.11        | -2.75      | -4.24        | -2.22      | -2.91        |
| VKORC1  | vitamin K epoxide reductase   | chr16p11.2           | drug metabolic process                     | ---                                   | 1.02          | -1.01           | 1.06      | 1.08        | -1.02     | -1.05       | 1.29       | 1.10         | 1.56       | 1.32         | 1.11       | 1.24         |
| VLDLR   | very low density lipoprotein  | chr9p24              | negative regulation of transcription from  | ---                                   | 1.13          | -1.07           | 1.23      | 1.03        | 1.42      | 1.25        | 1.12       | -1.11        | 1.31       | 1.98         | 2.75       | 2.84         |
| VMA21   | VMA21 vacuolar H+-ATPase      | chrXq28              | vacuolar proton-transporting V-type ATP    | ---                                   | 1.19          | 1.13            | -1.01     | 1.01        | -1.05     | -1.03       | 1.16       | 1.14         | 2.57       | 2.19         | 3.41       | 3.08         |
| VMA21   | VMA21 vacuolar H+-ATPase      | chrXq28              | vacuolar proton-transporting V-type ATP    | ---                                   | -1.09         | -1.00           | -1.06     | -1.10       | 1.03      | -1.00       | -1.17      | -1.15        | -1.38      | -1.24        | -1.67      | -1.61        |
| VMA21   | VMA21 vacuolar H+-ATPase      | chrXq28              | vacuolar proton-transporting V-type ATP    | ---                                   | -1.14         | -1.48           | -1.22     | -1.48       | -1.66     | 1.25        | 1.27       | 1.56         | 1.05       | 1.19         | 2.11       | 1.26         |
| VPS13A  | vacuolar protein sorting 13   | chr9q21              | transport                                  | ---                                   | 1.28          | 1.01            | 1.04      | -1.06       | -1.06     | 1.05        | -1.44      | -1.35        | -1.40      | -1.34        | -1.60      | -2.72        |
| VPS13A  | vacuolar protein sorting 13   | chr9q21              | transport                                  | ---                                   | 1.35          | 1.28            | 1.10      | 1.12        | -1.07     | 1.15        | -1.30      | -1.26        | -1.39      | -1.35        | -1.38      | -1.70        |
| VPS13A  | vacuolar protein sorting 13   | chr9q21              | Golgi to endosome transport                | ---                                   | -1.03         | -1.02           | 1.27      | 1.12        | -1.15     | -1.03       | -1.17      | -1.01        | -2.11      | -1.61        | -1.39      | -1.44        |
| VPS13A  | vacuolar protein sorting 13   | chr9q21              | transport                                  | ---                                   | 1.15          | 1.01            | 1.10      | 1.16        | -1.07     | 1.14        | -1.16      | -1.22        | -1.83      | -1.34        | -1.41      | -1.54        |
| VPS13A  | vacuolar protein sorting 13   | chr9q21              | transport                                  | ---                                   | 1.10          | 1.00            | 1.04      | 1.19        | -1.05     | 1.09        | -1.14      | -1.02        | -1.77      | -1.46        | -1.79      | -1.67        |
| VPS13B  | vacuolar protein sorting 13   | chr8q22.2            | transport                                  | ---                                   | -1.21         | 1.52            | 1.23      | 1.23        | -1.59     | -1.02       | 1.60       | -1.50        | 10.15      | 4.66         | 1.62       | 1.23         |
| VPS13B  | vacuolar protein sorting 13   | chr8q22.2            | transport                                  | ---                                   | 1.01          | 1.00            | -1.02     | -1.03       | -1.01     | 1.03        | -1.07      | 1.01         | -2.10      | -1.81        | -2.32      | -2.13        |
| VPS13B  | vacuolar protein sorting 13   | chr8q22.2            | transport                                  | ---                                   | 1.03          | 1.04            | 1.12      | 1.09        | -1.02     | -1.01       | -1.13      | -1.08        | -2.69      | -2.21        | -2.48      | -2.72        |
| VPS13C  | vacuolar protein sorting 13   | chr15q22.2           | 0                                          | ---                                   | 1.54          | -1.05           | 1.39      | -1.31       | -1.10     | 1.16        | -1.06      | -1.13        | -1.79      | -1.57        | -4.04      | -3.14        |
| VPS13C  | vacuolar protein sorting 13   | chr15q22.2           | protein localization                       | ---                                   | 1.25          | 1.12            | 1.04      | 1.02        | -1.04     | 1.03        | -1.20      | -1.11        | -1.87      | 1.37         | -2.11      | -2.29        |
| VPS13D  | vacuolar protein sorting 13   | chr1p36.22           | protein localization                       | ---                                   | -1.02         | 1.05            | 1.01      | 1.00        | 1.12      | -1.13       | 1.00       | -1.02        | -2.26      | -1.80        | -2.30      | -1.74        |
| VPS13D  | vacuolar protein sorting 13   | chr1p36.22           | protein localization                       | ---                                   | 1.06          | 1.04            | 1.16      | -1.06       | 1.01      | 1.07        | -1.17      | -1.27        | -1.47      | -1.27        | -1.19      | -1.11        |
| VPS25   | vacuolar protein sorting 25   | chr17q21.31          | transcription, DNA-dependent               | ---                                   | -1.10         | -1.08           | 1.00      | -1.12       | 1.08      | -1.02       | 1.01       | -1.16        | 1.36       | 1.35         | 1.29       | 1.33         |
| VPS26B  | vacuolar protein sorting 26   | chr11q25             | transport                                  | ---                                   | 1.03          | 1.11            | 1.06      | 1.15        | 1.11      | 1.19        | 1.08       | -1.02        | -1.40      | -1.33        | -1.36      | -1.25        |
| VPS33A  | vacuolar protein sorting 33   | chr12q24.31          | transport                                  | ---                                   | 1.10          | 1.15            | 1.01      | 1.10        | -1.07     | 1.02        | -1.13      | 1.02         | -1.73      | -1.38        | -1.68      | -1.91        |
| VPS33A  | vacuolar protein sorting 33   | chr12q24.31          | transport                                  | ---                                   | 1.04          | 1.01            | 1.09      | 1.16        | 1.14      | 1.16        | 1.00       | 1.02         | -1.72      | -1.64        | -1.43      | -1.47        |
| VPS33B  | vacuolar protein sorting 33   | chr15q26.1           | transport                                  | ---                                   | -1.10         | -1.07           | 1.12      | 1.10        | 1.08      | -1.12       | 1.14       | 1.19         | 1.31       | 1.15         | 1.04       | 1.20         |
| VPS35   | vacuolar protein sorting 35   | chr16q12             | transport                                  | ---                                   | -1.10         | -1.02           | -1.04     | -1.03       | -1.04     | -1.07       | 1.02       | 1.06         | -1.08      | -1.00        | -1.14      | -1.01        |
| VPS36   | vacuolar protein sorting 36   | chr13q14.3           | transcription, DNA-dependent               | ---                                   | -1.03         | -1.05           | -1.00     | -1.05       | 1.01      | 1.16        | -1.31      | -1.22        | -2.60      | -1.78        | -2.47      | -2.64        |
| VPS37A  | vacuolar protein sorting 37   | chr8p22              | transport                                  | ---                                   | 1.13          | 1.17            | 1.06      | -1.06       | -1.13     | -1.04       | -1.00      | -1.05        | 1.31       | 1.39         | 1.73       | 1.34         |
| VPS37A  | vacuolar protein sorting 37   | chr8p22              | transport                                  | ---                                   | 1.01          | -1.12           | -1.01     | -1.20       | 1.24      | 1.17        | -1.15      | -1.07        | -1.07      | 1.11         | 1.67       | 1.55         |
| VPS37C  | vacuolar protein sorting 37   | chr11q12.2           | transport                                  | ---                                   | 1.02          | -1.07           | 1.07      | 1.19        | -1.00     | -1.09       | 1.21       | 1.25         | 1.53       | 1.27         | 1.45       | 1.53         |
| VPS37C  | vacuolar protein sorting 37   | chr11q12.2           | transport                                  | ---                                   | 1.22          | -1.05           | 1.00      | 1.11        | 1.05      | -1.02       | 1.25       | 1.34         | 1.68       | 1.29         | 1.46       | 1.43         |
| VPS39   | vacuolar protein sorting 39   | chr15q15.1           | transport                                  | ---                                   | -1.03         | 1.00            | 1.06      | 1.16        | 1.15      | 1.02        | 1.03       | 1.08         | -1.41      | -1.23        | -1.54      | -1.28        |
| VPS41   | vacuolar protein sorting 41   | chr7p14-p13          | transport                                  | ---                                   | 1.16          | 1.14            | 1.07      | 1.01        | 1.04      | 1.16        | -1.37      | -1.12        | -2.04      | -1.78        | -1.99      | -2.23        |
| VPS41   | vacuolar protein sorting 41   | chr7p14-p13          | transport                                  | ---                                   | 1.13          | 1.12            | -1.39     | 1.23        | 1.06      | 1.23        | 1.10       | -1.10        | -1.83      | -1.77        | -1.32      | -1.26        |
| VPS41   | vacuolar protein sorting 41   | chr7p14-p13          | transport                                  | ---                                   | -1.03         | -1.01           | 1.10      | -1.06       | 1.05      | -1.12       | -1.07      | 1.04         | -2.09      | -1.92        | -1.79      | -1.94        |
| VPS45   | vacuolar protein sorting 45   | chr14q21.2           | transport                                  | ---                                   | 1.02          | -1.00           | -1.01     | 1.05        | 1.05      | 1.02        | -1.04      | -1.07        | -1.18      | -1.13        | -1.31      | -1.27        |
| VPS4B   | vacuolar protein sorting 4    | chr18q21.33          | ATP catabolic process                      | ---                                   | 1.04          | 1.17            | -1.05     | -1.03       | -1.29     | -1.06       | -1.20      | -1.12        | -1.83      | -1.55        | -1.27      | -1.32        |
| VPS51   | vacuolar protein sorting 51   | chr11q13             | transport                                  | ---                                   | -1.01         | -1.00           | -1.02     | 1.08        | -1.03     | -1.16       | 1.42       | 1.30         | 1.11       | -1.15        | -1.59      | -1.46        |
| VPS52   | vacuolar protein sorting 52   | chr6p21.3            | transport                                  | ---                                   | 1.03          | -1.00           | 1.00      | 1.03        | 1.03      | -1.02       | -1.03      | -1.02        | -1.20      | -1.12        | -1.42      | -1.28        |
| VPS53   | vacuolar protein sorting 53   | chr17p13.3           | transport                                  | ---                                   | 1.02          | -1.16           | -1.10     | 1.03        | -1.06     | 1.02        | 1.01       | 1.19         | -2.18      | -2.33        | -2.27      | -1.38        |
| VPS53   | vacuolar protein sorting 53   | chr17p13.3           | transport                                  | ---                                   | 1.06          | 1.02            | 1.33      | 1.39        | -1.02     | -1.19       | -1.05      | -1.09        | 1.01       | -1.13        | 1.02       | 1.14         |
| VPS53   | vacuolar protein sorting 53   | chr17p13.3           | transport                                  | ---                                   | -1.06         | -1.06           | 1.01      | 1.02        | 1.15      | -1.12       | -1.30      | -1.09        | -2.62      | -2.27        | -2.27      | -2.22        |
| VPS53   | vacuolar protein sorting 53   | chr17p13.3           | transport                                  | ---                                   | 1.08          | 1.10            | 1.11      | 1.02        | -1.11     | -1.01       | 1.17       | -1.08        | -1.27      | -1.26        | -1.31      | -1.17        |
| VPS54   | vacuolar protein sorting 54   | chr2p13-p14          | transport                                  | ---                                   | 1.03          | 1.09            | 1.09      | 1.03        | -1.07     | 1.02        | -1.29      | -1.04        | -1.39      | -1.19        | -1.42      | -1.48        |
| VRK2    | vaccinia related kinase 2     | chr2p16.1            | protein phosphorylation                    | ---                                   | 1.02          | 1.05            | 1.04      | 1.18        | 1.08      | 1.05        | -1.05      | 1.04         | -1.37      | -1.20        | -1.28      | -1.12        |
| VRK3    | vaccinia related kinase 3     | chr19q13             | protein phosphorylation                    | ---                                   | -1.31         | -1.26           | 1.07      | -1.02       | 1.10      | 1.03        | -1.05      | 1.02         | -1.12      | -1.11        | 1.08       | 1.44         |
| VRK3    | vaccinia related kinase 3     | chr19q13             | protein phosphorylation                    | ---                                   | -1.03         | 1.14            | 1.31      | 1.18        | -1.04     | -1.00       | -1.17      | 1.20         | -1.10      | -1.55        | -2.04      | -1.95        |
| VRK3    | vaccinia related kinase 3     | chr19q13             | protein phosphorylation                    | ---                                   | -1.26         | -1.25           | 1.14      | 1.02        | 1.11      | 1.02        | 1.26       | 1.13         | 1.43       | 1.29         | 1.52       | 1.56         |
| VSIG10  | V-set and immunoglobulin      | chr12q24.23          | 0                                          | ---                                   | 1.11          | 1.13            | -1.03     | -1.09       | 1.08      | 1.08        | -1.07      | 1.06         | -1.69      | -1.72        | -2.10      | -2.77        |
| VSIG10  | V-set and immunoglobulin      | chr12q24.23          | 0                                          | ---                                   | 1.16          | 1.16            | -1.00     | 1.06        | -1.25     | 1.04        | -1.07      | 1.04         | -1.35      | -1.48        | -1.59      | -1.99        |
| VSIG10  | V-set and immunoglobulin      | chr12q24.23          | 0                                          | ---                                   | 1.14          | 1.01            | -1.07     | -1.20       | -1.11     | -1.10       | 1.15       | 1.11         | -2.18      | -2.31        | -3.35      | -3.01        |
| VSIG10L | V-set and immunoglobulin      | chr12q24.23          | 0                                          | ---                                   | -1.07         | -1.22           | 1.06      | -1.02       | 1.17      | 1.22        | -1.28      | -1.12        | -2.17      | -1.62        | -2.06      | -1.90        |
| VSIG10L | V-set and immunoglobulin      | chr19q13.41          | 0                                          | ---                                   | -1.00         | -1.21           | -1.12     | 1.06        | -1.10     | -1.01       | 1.15       | 1.13         | -1.42      | -1.36        | -1.89      | -1.66        |
| VTAI    | Yps20-associated 1 homologue  | chr6q24.1            | transport                                  | ---                                   | -1.00         | 1.03            | 1.01      | -1.12       | 1.05      | -1.06       | 1.11       | 1.05         | 1.04       | 1.18         | 1.31       | 1.12         |
| VT11A   | vesicle transport through in  | chr10q25.2           | transport                                  | ---                                   | 1.02          | 1.15            | 1.03      | -1.09       | -1.10     | 1.01        | -1.08      | -1.12        | 1.21       | 1.23         | -1.04      | -1.10        |
| VT11A   | vesicle transport through in  | chr10q25.2           | transport                                  | ---                                   | -1.01         | 1.05            | -1.14     | -1.01       | -1.09     | 1.04        | -1.30      | -1.16        | -1.98      | -1.87        | -1.73      | -2.31        |
| VT11A   | vesicle transport through in  | chr10q25.2           | transport                                  | ---                                   | -1.10         | -1.10           | -1.11     | 1.03        | -1.13     | -1.19       | 1.42       | 1.31         | 1.94       | 1.57         | 1.14       | 1.09         |
| VT11A   | vesicle transport through in  | chr10q25.2           | transport                                  | ---                                   | 1.79          | 1.47            | 1.03      | -1.26       | -1.05     | 1.09        | -1.33      | -1.09        | -4.26      | -2.87        | -1.90      | -2.11        |
| VT11B   | vesicle transport through in  | chr14q24.1           | autophagic vacuole fusion                  | ---                                   | -1.10         | 1.06            | -1.05     | -1.06       | 1.22      | 1.03        | -1.05      | -1.00        | -1.10      | -1.05        | -1.60      | -1.28        |
| VT11B   | vesicle transport through in  | chr14q24.1           | autophagic vacuole fusion                  | ---                                   | -1.03         | -1.10           | -1.01     | 1.12        | 1.07      | -1.12       | 1.02       | 1.09         | 1.08       | 1.02         | -1.45      | -1.12        |
| VWA3B   | von Willebrand factor A do    | chr2p11.2            | 0                                          | ---                                   | -1.87         | -1.09           | -1.12     | 2.04        | 7.13      | 1.35        | -7.34      | -1.68        | 1.08       | -4.03        | 1.11       | -1.15        |
| VWA5A   | von Willebrand factor A do    | chr11q24.1           | 0                                          | ---                                   | 1.10          | 1.07            | -1.07     | -1.01       | 1.13      | 1.05        | 1.20       | 1.15         | 2.20       | 1.84         | 1.64       | 1.36         |
| VWA5A   | von Willebrand factor A do    | chr11q24.1           | 0                                          | ---                                   | -1.11         | -1.05           | -1.19     | -1.28       | 1.16      | 1.07        | -1.12      | -1.08        | 1.07       | 1.13         | 1.32       | 1.48         |

| ID        | Gene Title                 | Chromosomal Location | 1st Gene Ontology Biological Process  | Pathway                      | A2497 30 mins | A2497P' 30 mins | A2497 2 h | A2497P' 2 h | A2497 4 h | A2497P' 4 h | A2497 24 h | A2497P' 24 h | A2497 48 h | A2497P' 48 h | A2497 72 h | A2497P' 72 h |
|-----------|----------------------------|----------------------|---------------------------------------|------------------------------|---------------|-----------------|-----------|-------------|-----------|-------------|------------|--------------|------------|--------------|------------|--------------|
| VWA8      | von Willebrand factor A do | chr13q14.11          | ATP catabolic process                 | ---                          | 1.11          | 1.19            | -1.02     | -1.07       | 1.11      | -1.12       | -1.21      | 1.09         | -1.29      | -1.05        | -1.63      | -1.63        |
| VWA8      | von Willebrand factor A do | chr13q14.11          | ATP catabolic process                 | ---                          | -1.03         | -1.08           | -1.04     | -1.05       | 1.06      | 1.06        | -1.01      | 1.12         | -1.94      | -1.45        | -1.93      | -2.01        |
| VWA9      | von Willebrand factor A do | chr15q22.31          | 0                                     | ---                          | 1.08          | 1.05            | 1.03      | -1.04       | 1.13      | 1.05        | -1.04      | -1.11        | -1.30      | -1.41        | 1.10       | -1.05        |
| WAC       | WW domain containing ad    | chr10p12.1 10p12.1   | cell cycle checkpoint                 | ---                          | -1.14         | -1.22           | -1.00     | 1.03        | 1.01      | -1.02       | 1.07       | 1.23         | 1.12       | 1.22         | 1.35       | ---          |
| WAC       | WW domain containing ad    | chr10p12.1 10p12.1   | cell cycle checkpoint                 | ---                          | 1.03          | 1.25            | 1.12      | 1.03        | -1.26     | -1.09       | -1.52      | -1.27        | -1.37      | -1.46        | -1.32      | -1.23        |
| WAPAL     | wings apart-like homolog   | chr10q23.2           | mitotic cell cycle                    | ---                          | -1.17         | -1.02           | 1.02      | 1.05        | 1.10      | 1.12        | -1.02      | 1.01         | 1.10       | 1.03         | 1.62       | 1.62         |
| WAPAL     | wings apart-like homolog   | chr10q23.2           | mitotic cell cycle                    | ---                          | 1.06          | 1.10            | 1.13      | -1.07       | -1.00     | -1.01       | -1.09      | -1.18        | 1.09       | 1.04         | 1.49       | 1.52         |
| WAPAL     | wings apart-like homolog   | chr10q23.2           | mitotic cell cycle                    | ---                          | -1.14         | -1.00           | 1.09      | 1.06        | 1.14      | 1.15        | -1.05      | 1.17         | 1.05       | 1.04         | 1.46       | 1.38         |
| WARS      | tryptophanyl-rRNA synthet  | chr14q32.31          | angiogenesis                          | ---                          | 1.13          | 1.05            | 1.03      | -1.01       | 1.17      | -1.00       | 1.27       | -1.02        | 1.60       | 1.34         | 1.11       | 1.21         |
| WARS      | tryptophanyl-rRNA synthet  | chr14q32.31          | angiogenesis                          | ---                          | -1.06         | -1.06           | -1.01     | 1.05        | 1.11      | -1.06       | 1.26       | 1.19         | 1.74       | 1.41         | 1.06       | 1.13         |
| WARS2     | tryptophanyl rRNA synthet  | chr1p12              | vasculogenesis                        | ---                          | 1.01          | 1.03            | 1.15      | -1.01       | 1.05      | 1.01        | 1.24       | 1.02         | 1.09       | -1.05        | 1.03       | -1.28        |
| WARS2     | tryptophanyl rRNA synthet  | chr1p12              | vasculogenesis                        | ---                          | -1.02         | -1.00           | 1.03      | 1.17        | 1.08      | -1.01       | 1.26       | 1.19         | -1.30      | -1.21        | -1.26      | -1.13        |
| WASF1     | WAS protein family, mem    | chr6q21              | protein complex assembly              | ---                          | 1.06          | 1.13            | -1.02     | -1.08       | -1.11     | 1.06        | -1.23      | -1.12        | -1.60      | -1.23        | -1.21      | -1.28        |
| WASF2     | WAS protein family, mem    | chr1p36.11           | regulation of neurotransmitter levels | ---                          | -1.11         | -1.11           | -1.10     | 1.04        | 1.06      | 1.04        | 1.11       | -1.01        | 1.48       | 1.52         | 1.35       | 1.47         |
| WASF2     | WAS protein family, mem    | chr1p36.11           | regulation of neurotransmitter levels | ---                          | -1.34         | -1.28           | 1.12      | 1.00        | 1.34      | 1.23        | 1.27       | -1.00        | 1.34       | 1.35         | 1.69       | 1.60         |
| WASF2     | WAS protein family, mem    | chr1p36.11           | regulation of neurotransmitter levels | ---                          | -1.12         | -1.09           | 1.05      | 1.04        | 1.08      | 1.04        | 1.10       | 1.05         | 1.30       | 1.23         | 1.29       | 1.32         |
| WBP2      | WW domain binding protei   | chr17q25             | 0                                     | ---                          | 1.19          | 1.15            | 1.09      | -1.07       | 1.05      | 1.06        | 1.02       | 1.06         | 1.16       | 1.06         | 1.54       | 1.27         |
| WBP4      | WW domain binding protei   | chr13q14.11          | mRNA processing                       | ---                          | 1.64          | 1.58            | 1.13      | 1.02        | 1.03      | -1.10       | 1.09       | 1.17         | -1.94      | -1.74        | -1.23      | -1.42        |
| WBSR28    | Williams-Beuren syndrome   | chr7q11.23           | 0                                     | ---                          | -2.31         | -1.52           | -1.20     | 1.10        | -2.02     | -1.10       | 1.04       | -1.33        | 2.03       | 1.97         | 1.23       | -1.34        |
| WDFY2     | WD repeat and FYVE dom     | chr13q14.3           | 0                                     | ---                          | 1.03          | 1.07            | -1.20     | 1.13        | 1.22      | -1.11       | -1.03      | 1.50         | 1.43       | 1.20         | 1.39       | 1.51         |
| WDFY3     | WD repeat and FYVE dom     | chr4q21.23           | 0                                     | ---                          | -1.05         | -1.05           | 1.18      | 1.01        | -1.11     | -1.07       | 1.09       | -1.21        | -1.74      | -1.47        | -1.93      | -2.19        |
| WDFY3     | WD repeat and FYVE dom     | chr4q21.23           | 0                                     | ---                          | -1.11         | 1.02            | 1.21      | 1.03        | -1.26     | -1.21       | -1.41      | -1.33        | -3.57      | -1.88        | -2.05      | -2.79        |
| WDFY3     | WD repeat and FYVE dom     | chr4q21.23           | 0                                     | ---                          | 1.22          | 1.29            | 1.04      | -1.07       | -1.03     | -1.02       | -1.15      | -1.15        | -3.18      | -1.95        | -2.54      | -3.30        |
| WDFY3-AS2 | WDFY3 antisense RNA 2      | chr4q21.3            | 0                                     | ---                          | -2.01         | -1.26           | 1.08      | 1.46        | -1.29     | 1.29        | -1.31      | -2.33        | -2.10      | -1.43        | -3.63      | -1.56        |
| WDHD1     | WD repeat and HMG-box      | chr14q22.2           | RNA processing                        | ---                          | 1.20          | 1.08            | 1.26      | 1.01        | -1.12     | -1.11       | -1.17      | -1.05        | -1.29      | -1.29        | -1.34      | -1.59        |
| WDHD1     | WD repeat and HMG-box      | chr14q22.2           | RNA processing                        | ---                          | 1.10          | 1.06            | -1.04     | 1.02        | -1.14     | 1.11        | -1.11      | 1.10         | -1.19      | -1.02        | -1.39      | -1.32        |
| WDR1      | WD repeat domain 1         | chr4p16.1            | platelet degranulation                | Hypertrophy_model // GenMAPP | 1.06          | 1.00            | 1.16      | 1.15        | 1.09      | 1.09        | -1.09      | 1.03         | 1.78       | 1.54         | 1.32       | 1.25         |
| WDR1      | WD repeat domain 1         | chr4p16.1            | platelet degranulation                | Hypertrophy_model // GenMAPP | 1.10          | 1.06            | 1.14      | 1.08        | 1.14      | 1.09        | -1.03      | 1.01         | -1.05      | -1.04        | -1.05      | -1.07        |
| WDR1      | WD repeat domain 1         | chr4p16.1            | platelet degranulation                | Hypertrophy_model // GenMAPP | -1.01         | 1.02            | 1.05      | 1.08        | 1.05      | -1.09       | 1.45       | 1.39         | 1.71       | 1.26         | 1.44       | 1.49         |
| WDR11     | WD repeat domain 11        | chr10q26             | 0                                     | ---                          | -1.89         | -2.13           | 1.08      | -1.10       | -1.01     | -1.07       | 1.25       | 1.26         | -1.69      | -1.85        | -1.88      | -1.49        |
| WDR11     | WD repeat domain 11        | chr10q26             | 0                                     | ---                          | 1.26          | 1.19            | 1.04      | 1.06        | -1.09     | 1.21        | -1.30      | 1.01         | -1.58      | -1.34        | -1.66      | -1.82        |
| WDR11-AS1 | WDR11 antisense RNA 1      | chr10q26.13          | 0                                     | ---                          | -1.48         | -1.12           | 1.07      | -1.52       | 1.35      | 1.27        | -1.04      | 1.81         | 1.26       | 1.56         | 2.02       | 2.09         |
| WDR16     | WD repeat domain 16        | chr17p13.1           | 0                                     | ---                          | -1.61         | -1.56           | 1.82      | 1.27        | 1.01      | 1.08        | 1.03       | 1.11         | -2.37      | -2.12        | -1.81      | -2.06        |
| WDR19     | WD repeat domain 19        | chr4p14              | cell morphogenesis                    | ---                          | 1.69          | -1.07           | 1.40      | 1.43        | -2.67     | -1.69       | 1.02       | 1.06         | -3.87      | -2.31        | -3.06      | -3.16        |
| WDR19     | WD repeat domain 19        | chr4p14              | cell morphogenesis                    | ---                          | 1.07          | 1.27            | -1.04     | -1.04       | -1.02     | -1.04       | 1.03       | 1.00         | -3.17      | -2.88        | -4.18      | -5.04        |
| WDR19     | WD repeat domain 19        | chr4p14              | cell morphogenesis                    | ---                          | -1.26         | 1.21            | 1.26      | 1.17        | -1.30     | -1.15       | -1.57      | -1.97        | -1.18      | -1.46        | -1.58      | -1.96        |
| WDR20     | WD repeat domain 20        | chr14q32.31          | 0                                     | ---                          | -1.01         | 1.03            | 1.08      | 1.05        | -1.05     | -1.04       | -1.17      | -1.05        | 1.36       | 1.14         | 1.74       | 1.29         |
| WDR24     | WD repeat domain 24        | chr16p13.3           | protein import into peroxisome matrix | ---                          | 1.12          | 1.12            | -1.06     | 1.03        | 1.05      | -1.01       | 1.22       | 1.23         | 1.76       | 1.13         | 1.73       | 1.79         |
| WDR25     | WD repeat domain 25        | chr14q32.2           | 0                                     | ---                          | -1.04         | -1.22           | 1.00      | -1.04       | -1.05     | -1.00       | -1.09      | 1.04         | 1.89       | 1.98         | 1.86       | 2.23         |
| WDR26     | WD repeat domain 26        | chr1q42.13           | 0                                     | ---                          | 1.24          | 1.15            | 1.24      | 1.20        | 1.20      | 1.32        | -1.02      | 1.15         | 1.15       | 1.31         | 1.27       | 1.05         |
| WDR26     | WD repeat domain 26        | chr1q42.13           | 0                                     | ---                          | -1.08         | -1.03           | 1.07      | 1.07        | 1.01      | 1.01        | -1.02      | 1.04         | -1.31      | -1.27        | -1.02      | 1.02         |
| WDR26     | WD repeat domain 26        | chr1q42.13           | 0                                     | ---                          | -1.04         | -1.08           | -1.12     | -1.10       | 1.13      | 1.00        | 1.46       | 1.20         | 1.07       | 1.26         | 1.59       | 1.63         |
| WDR27     | WD repeat domain 27        | chr6q27              | 0                                     | ---                          | 1.20          | -1.19           | -1.24     | 1.02        | 1.01      | -1.13       | 1.21       | 1.42         | 1.27       | 1.49         | 1.05       | 1.45         |
| WDR27     | WD repeat domain 27        | chr6q27              | 0                                     | ---                          | 1.08          | 1.24            | 1.22      | 1.15        | 1.54      | 1.31        | 1.11       | -1.10        | -3.27      | -2.35        | -1.52      | -2.48        |
| WDR27     | WD repeat domain 27        | chr6q27              | 0                                     | ---                          | 1.15          | 1.05            | -1.01     | 1.09        | -1.14     | 1.09        | -1.27      | 1.10         | -1.82      | -1.41        | -1.75      | -2.20        |
| WDR31     | WD repeat domain 31        | chr9q32              | 0                                     | ---                          | -1.11         | -1.11           | 1.08      | -1.13       | -1.27     | 1.03        | -1.22      | -1.25        | -3.00      | -2.72        | -2.88      | -2.16        |
| WDR31     | WD repeat domain 31        | chr9q32              | 0                                     | ---                          | 1.23          | 1.06            | 1.63      | -1.30       | 1.34      | 2.39        | -1.76      | -1.24        | -1.96      | -1.15        | -2.04      | -1.98        |
| WDR34     | WD repeat domain 34        | chr9q34.11           | 0                                     | ---                          | -1.16         | -1.07           | -1.02     | 1.01        | 1.08      | -1.08       | 1.07       | 1.09         | 1.08       | -1.03        | -1.34      | -1.19        |
| WDR35     | WD repeat domain 35        | chr2p24.1            | cell projection organization          | ---                          | 1.14          | 1.14            | -1.05     | -1.06       | 1.10      | 1.12        | 1.10       | 1.18         | -2.09      | -2.40        | 1.11       | -1.15        |
| WDR35     | WD repeat domain 35        | chr2p24.1            | cell projection organization          | ---                          | 1.08          | 1.01            | -1.05     | 1.14        | -1.22     | 1.00        | -1.35      | -1.05        | -2.42      | -2.40        | -1.99      | -1.87        |
| WDR36     | WD repeat domain 36        | chr5q22.1            | retina homeostasis                    | ---                          | -1.13         | -1.03           | 1.03      | 1.05        | -1.01     | -1.06       | 1.23       | 1.16         | 1.60       | 1.37         | 2.10       | 1.91         |
| WDR37     | WD repeat domain 37        | chr10p15.3           | 0                                     | ---                          | -1.04         | -1.14           | 1.01      | 1.13        | 1.30      | 1.71        | -1.01      | 1.18         | 1.85       | 2.03         | 1.80       | 2.15         |
| WDR4      | WD repeat domain 4         | chr21q22.3           | rRNA modification                     | ---                          | -1.17         | -1.22           | 1.13      | 1.05        | 1.24      | 1.10        | -1.16      | -1.23        | -1.31      | -1.31        | -1.43      | -1.28        |
| WDR4      | WD repeat domain 4         | chr21q22.3           | rRNA modification                     | ---                          | -1.05         | -1.08           | 1.04      | 1.11        | 1.04      | -1.05       | 1.04       | 1.13         | -1.20      | -1.48        | -1.44      | -1.29        |
| WDR41     | WD repeat domain 41        | chr5q13.3            | 0                                     | ---                          | -1.06         | 1.01            | -1.04     | -1.01       | 1.04      | -1.01       | 1.03       | 1.06         | -1.11      | -1.00        | -1.17      | -1.14        |
| WDR41     | WD repeat domain 41        | chr5q13.3            | 0                                     | ---                          | 1.47          | 1.32            | -1.15     | 1.02        | 1.25      | 1.39        | -1.04      | 1.01         | -2.83      | -2.17        | -2.89      | -3.29        |
| WDR41     | WD repeat domain 41        | chr5q13.3            | 0                                     | ---                          | -1.00         | -1.07           | 1.06      | 1.05        | 1.08      | -1.05       | 1.14       | 1.12         | 1.31       | 1.32         | 1.12       | 1.21         |
| WDR45     | WD repeat domain 45        | chrXp11.23           | autophagic vacuole assembly           | ---                          | 1.06          | 1.00            | 1.03      | 1.14        | 1.01      | -1.03       | 1.16       | 1.19         | 1.07       | -1.00        | -1.82      | -1.63        |
| WDR45     | WD repeat domain 45        | chrXp11.23           | autophagic vacuole assembly           | ---                          | -1.02         | -1.03           | 1.01      | 1.14        | 1.00      | -1.12       | 1.10       | 1.15         | 1.12       | -1.04        | -1.72      | -1.52        |
| WDR45B    | WD repeat domain 45B       | chr17q25.3           | autophagic vacuole assembly           | ---                          | 1.00          | 1.04            | -1.02     | -1.08       | 1.01      | 1.04        | 1.07       | -1.05        | 1.71       | 1.81         | 1.39       | 1.42         |
| WDR46     | WD repeat domain 46        | chr6p21.3            | 0                                     | ---                          | -1.14         | -1.23           | 1.15      | 1.08        | 1.04      | -1.09       | 1.20       | 1.24         | 1.21       | 1.04         | 1.47       | 1.80         |
| WDR5      | WD repeat domain 5         | chr9q34              | skeletal system development           | ---                          | -1.03         | -1.10           | -1.10     | -1.08       | 1.22      | 1.09        | -1.05      | 1.00         | 1.32       | 1.34         | 1.34       | 1.38         |
| WDR52     | WD repeat domain 52        | chr3q13.2            | 0                                     | ---                          | 1.04          | 1.03            | 1.01      | -1.15       | 1.10      | 1.01        | 1.15       | -1.09        | -2.55      | -2.66        | -3.16      | -5.24        |
| WDR52     | WD repeat domain 52        | chr3q13.2            | 0                                     | ---                          | -1.11         | -1.28           | 1.02      | 1.26        | 1.30      | 1.22        | -1.04      | 1.00         | -2.27      | -2.58        | -1.99      | -1.99        |
| WDR53     | WD repeat domain 53        | chr3q29              | 0                                     | ---                          | 1.17          | 1.04            | 1.08      | 1.15        | -1.12     | 1.08        | -1.01      | -1.05        | 1.21       | 1.28         | 1.32       | 1.37         |
| WDR55     | WD repeat domain 55        | chr5q31.3            | rRNA processing                       | ---                          | 1.03          | 1.11            | -1.03     | -1.06       | 1.04      | 1.01        | -1.02      | -1.00        | 1.93       | 1.15         | 2.37       | 2.97         |

| ID      | Gene Title                 | Chromosomal Location | 1st Gene Ontology Biological Process        | Pathway | A2497 30 mins | A2497P' 30 mins | A2497 2 h | A2497P' 2 h | A2497 4 h | A2497P' 4 h | A2497 24 h | A2497P' 24 h | A2497 48 h | A2497P' 48 h | A2497 72 h | A2497P' 72 h |
|---------|----------------------------|----------------------|---------------------------------------------|---------|---------------|-----------------|-----------|-------------|-----------|-------------|------------|--------------|------------|--------------|------------|--------------|
| WDR55   | WD repeat domain 55        | chr5q31.3            | rRNA processing                             | ---     | 1.24          | 1.04            | 1.13      | 1.11        | -1.05     | -1.14       | 1.27       | 1.03         | -1.01      | -1.07        | 1.28       | 1.67         |
| WDR59   | WD repeat domain 59        | chr16q23.1           | 0                                           | ---     | 1.25          | 1.23            | 1.09      | 1.04        | 1.04      | -1.53       | 1.25       | 1.26         | 2.98       | 2.80         | 1.77       | 1.48         |
| WDR59   | WD repeat domain 59        | chr16q23.1           | 0                                           | ---     | -1.06         | -1.08           | 1.01      | 1.04        | 1.25      | 1.14        | 1.25       | 1.26         | 1.68       | 1.54         | 1.61       | 1.37         |
| WDR59   | WD repeat domain 59        | chr16q23.1           | 0                                           | ---     | -1.05         | 1.02            | 1.10      | 1.08        | -1.00     | -1.14       | 1.18       | 1.02         | -1.12      | -1.22        | -1.20      | -1.25        |
| WDR5B   | WD repeat domain 5B        | chr3q21.1            | 0                                           | ---     | -1.21         | -1.27           | 1.14      | 1.09        | 1.07      | 1.05        | -1.44      | 1.12         | -3.00      | -2.54        | -1.93      | -1.79        |
| WDR6    | WD repeat domain 6         | chr3p21.31           | cell cycle                                  | ---     | -1.10         | -1.07           | -1.01     | 1.00        | -1.03     | -1.08       | 1.08       | 1.09         | 1.10       | -1.09        | -1.05      | 1.04         |
| WDR60   | WD repeat domain 60        | chr7q36.3            | 0                                           | ---     | 1.07          | -1.06           | 1.05      | 1.11        | 1.04      | -1.01       | 1.15       | 1.12         | -1.69      | -1.39        | -1.39      | -1.20        |
| WDR61   | WD repeat domain 61        | chr15q25.1           | transcription, DNA-dependent                | ---     | 1.04          | -1.48           | -1.28     | -1.21       | -1.35     | -1.05       | -1.04      | 1.21         | -1.28      | -1.20        | -2.64      | -1.94        |
| WDR62   | WD repeat domain 62        | chr19q13.12          | nervous system development                  | ---     | -1.08         | -1.18           | 1.29      | 1.33        | -1.08     | -1.07       | 1.35       | 1.05         | 1.48       | 1.23         | 1.12       | 1.20         |
| WDR66   | WD repeat domain 66        | chr12q24.31          | 0                                           | ---     | -1.42         | -1.30           | -1.09     | 1.04        | -2.09     | 1.31        | 1.82       | 1.28         | -1.07      | 1.67         | 1.23       | 1.36         |
| WDR66   | WD repeat domain 66        | chr12q24.31          | 0                                           | ---     | 1.16          | -1.44           | 1.03      | -1.22       | -1.74     | 1.86        | 1.41       | 1.43         | 3.18       | 3.86         | 1.16       | 1.52         |
| WDR67   | WD repeat domain 67        | chr8q24.13           | regulation of Rab GTPase activity           | ---     | 1.10          | 1.04            | -1.02     | -1.03       | -1.04     | -1.04       | -1.27      | -1.06        | -1.59      | -1.55        | -1.41      | -1.24        |
| WDR67   | WD repeat domain 67        | chr8q24.13           | regulation of Rab GTPase activity           | ---     | -1.05         | -1.17           | 1.15      | -1.03       | -1.12     | -1.10       | -1.13      | -1.19        | -1.03      | -1.03        | 1.20       | 1.13         |
| WDR7    | WD repeat domain 7         | chr18q21.31          | 0                                           | ---     | -1.00         | -1.06           | 1.08      | 1.11        | 1.02      | 1.04        | -1.30      | -1.21        | -2.20      | -1.91        | -2.29      | -1.50        |
| WDR70   | WD repeat domain 70        | chr5p13.2            | 0                                           | ---     | -1.09         | -1.06           | -1.03     | -1.09       | 1.05      | 1.01        | 1.04       | -1.05        | -1.22      | -1.32        | -1.16      | -1.10        |
| WDR72   | WD repeat domain 72        | chr15q21.3           | 0                                           | ---     | 1.19          | 1.16            | -1.17     | -1.25       | 1.30      | 1.43        | -1.29      | 1.09         | -2.29      | -1.68        | -3.44      | -3.04        |
| WDR73   | WD repeat domain 73        | chr15q25.2           | 0                                           | ---     | 1.01          | -1.03           | 1.02      | 1.18        | -1.01     | 1.04        | 1.11       | 1.25         | -1.70      | -1.66        | -2.03      | -1.55        |
| WDR73   | WD repeat domain 73        | chr15q25.2           | 0                                           | ---     | 1.65          | 1.71            | 1.30      | 1.39        | -1.16     | 1.21        | 1.22       | 1.14         | -2.14      | -1.54        | -1.85      | -1.41        |
| WDR74   | WD repeat domain 74        | chr11q12.3           | blastocyst formation                        | ---     | -1.96         | -2.86           | 1.09      | -1.50       | 1.23      | 2.08        | -3.15      | -1.22        | -2.12      | -1.78        | 1.06       | 2.31         |
| WDR74   | WD repeat domain 74        | chr11q12.3           | blastocyst formation                        | ---     | -1.06         | -1.05           | 1.03      | 1.01        | -1.00     | -1.03       | 1.10       | -1.01        | 1.12       | -1.04        | 1.23       | 1.33         |
| WDR74   | WD repeat domain 74        | chr11q12.3           | blastocyst formation                        | ---     | -1.17         | -1.11           | 1.02      | -1.03       | 1.13      | -1.03       | 1.31       | 1.04         | 1.23       | 1.01         | 1.35       | 1.39         |
| WDR75   | WD repeat domain 75        | chr2q32.2            | 0                                           | ---     | -1.02         | 1.10            | -1.02     | -1.08       | -1.06     | -1.05       | -1.02      | 1.03         | 1.03       | 1.03         | 1.31       | 1.19         |
| WDR76   | WD repeat domain 76        | chr15q15.3           | 0                                           | ---     | -1.16         | 1.01            | -1.00     | -1.01       | -1.18     | 1.10        | -1.42      | -1.21        | -2.22      | -1.64        | -1.77      | -1.75        |
| WDR76   | WD repeat domain 76        | chr15q15.3           | 0                                           | ---     | -1.04         | -1.24           | -1.04     | -1.04       | -1.02     | 1.19        | -1.05      | -1.10        | -1.59      | -1.59        | -1.44      | -1.45        |
| WDR77   | WD repeat domain 77        | chr1p13.2            | spliceosomal snRNP assembly                 | ---     | -1.08         | -1.03           | -1.07     | -1.00       | -1.05     | -1.08       | -1.16      | -1.02        | -1.10      | -1.09        | -1.05      | -1.02        |
| WDR78   | WD repeat domain 78        | chr1p31.3            | 0                                           | ---     | -8.62         | 1.11            | -2.47     | -5.49       | -3.72     | -3.96       | 2.10       | -1.50        | 1.06       | 2.24         | 1.23       | 1.45         |
| WDR78   | WD repeat domain 78        | chr1p31.3            | 0                                           | ---     | -5.38         | 1.03            | 2.83      | 2.11        | 2.31      | -1.52       | -3.54      | -2.57        | 6.78       | 1.48         | 2.57       | -1.98        |
| WDR83   | WD repeat domain 83        | chr19p13.2           | RNA splicing, via transesterification reac  | ---     | -1.06         | -1.19           | 1.02      | 1.07        | -1.04     | 1.01        | 1.32       | 1.22         | 1.27       | 1.09         | 1.46       | 1.75         |
| WDR86   | WD repeat domain 86        | chr7q36.1            | 0                                           | ---     | 1.63          | 1.10            | 1.23      | 1.07        | 1.46      | 1.33        | -1.03      | -1.12        | 1.90       | 1.86         | 1.26       | 2.00         |
| WDR89   | WD repeat domain 89        | chr14q23.2           | 0                                           | ---     | 1.12          | -1.14           | -1.17     | -1.23       | 1.09      | -1.03       | -1.11      | -1.20        | -1.43      | -1.07        | 1.06       | 1.15         |
| WDR89   | WD repeat domain 89        | chr14q23.2           | 0                                           | ---     | -1.17         | -1.14           | 1.12      | 1.09        | 1.08      | 1.12        | -1.18      | -1.13        | -1.01      | 1.07         | 1.29       | 1.32         |
| WDR90   | WD repeat domain 90        | chr16p13.3           | 0                                           | ---     | 4.42          | 2.56            | -1.19     | -1.33       | -2.23     | -1.10       | -1.15      | -1.52        | -2.58      | -1.29        | -1.62      | -1.75        |
| WDR91   | WD repeat domain 91        | chr7q33              | 0                                           | ---     | 1.06          | -1.22           | 1.24      | 1.01        | 1.06      | -1.25       | 1.53       | 1.17         | -2.09      | -1.98        | -1.46      | -1.44        |
| WDSUB1  | WD repeat, sterile alpha m | chr2q24.2            | protein ubiquitination                      | ---     | 1.08          | 1.19            | 1.16      | 1.17        | 1.03      | -1.15       | 1.01       | -1.01        | -1.45      | -1.55        | -1.32      | -1.44        |
| WDTIC1  | WD and tetratricopeptide r | chr1p36.11           | negative regulation of transcription from   | ---     | -1.05         | -1.21           | -1.17     | -1.03       | -1.20     | -1.23       | 1.16       | 1.01         | 1.06       | -1.00        | -1.45      | -1.22        |
| WDYHV1  | WDYHV motif containing     | chr8q24.13           | cellular protein modification process       | ---     | -1.04         | -1.14           | 1.16      | 1.16        | 1.13      | 1.17        | 1.01       | -1.03        | 1.30       | 1.33         | 1.42       | 1.43         |
| WFDC1   | WAP four-disulfide core d  | chr16q24.3           | regulation of cell growth                   | ---     | -1.08         | -1.18           | 1.24      | 1.28        | 1.36      | 1.20        | 1.33       | 1.23         | 1.91       | 1.64         | 1.56       | 1.79         |
| WFDC2   | WAP four-disulfide core d  | chr20q13.12          | proteolysis                                 | ---     | -3.81         | -1.03           | -1.23     | -1.25       | 1.08      | -1.32       | 1.05       | 1.21         | 1.24       | 1.04         | 1.54       | 2.14         |
| WFS1    | Wolfram syndrome 1 (wolf   | chr4p16.1            | kidney development                          | ---     | -1.07         | 1.05            | 1.04      | 1.06        | 1.00      | 1.10        | 1.27       | 1.03         | 1.27       | 1.47         | 1.58       | 1.48         |
| WFS1    | Wolfram syndrome 1 (wolf   | chr4p16.1            | kidney development                          | ---     | -1.09         | -1.10           | 1.01      | 1.07        | 1.02      | -1.05       | 1.12       | 1.14         | 1.18       | 1.09         | 1.30       | 1.33         |
| WHAMM   | WAS protein homolog asso   | chr15q25.2           | 0                                           | ---     | -1.08         | -1.04           | -1.00     | -1.11       | -1.03     | -1.05       | 1.06       | 1.09         | 1.11       | 1.18         | 1.45       | 1.37         |
| WHAMMP2 | WAS protein homolog asso   | chr15q11.2 /// chr15 | 0                                           | ---     | 1.09          | -1.23           | -1.07     | 1.39        | -1.26     | 1.19        | 1.61       | 1.05         | -1.05      | 1.37         | 1.34       | 1.09         |
| WHSC1   | Wolf-Hirschhorn syndrome   | chr4p16.3            | negative regulation of transcription from   | ---     | 1.23          | 1.14            | 1.02      | -1.03       | -1.04     | 1.12        | 1.04       | -1.11        | -1.52      | -1.26        | -1.58      | -1.91        |
| WHSC1   | Wolf-Hirschhorn syndrome   | chr4p16.3            | negative regulation of transcription from   | ---     | -1.10         | -1.03           | 1.08      | -1.20       | 1.10      | 1.02        | 1.06       | 1.04         | 1.31       | 1.27         | 1.13       | 1.02         |
| WHSC1   | Wolf-Hirschhorn syndrome   | chr4p16.3            | negative regulation of transcription from   | ---     | -1.30         | -1.09           | 1.20      | 1.01        | -1.18     | 1.08        | -1.12      | -1.04        | -1.12      | 1.01         | -1.67      | -1.25        |
| WHSC1L1 | Wolf-Hirschhorn syndrome   | chr8p11.2            | transcription, DNA-dependent                | ---     | 1.14          | 1.10            | 1.08      | -1.08       | 1.03      | 1.08        | 1.18       | 1.07         | 1.57       | 1.36         | 1.28       | -1.49        |
| WHSC1L1 | Wolf-Hirschhorn syndrome   | chr8p11.2            | transcription, DNA-dependent                | ---     | 1.18          | 1.24            | -1.05     | 1.08        | -1.14     | -1.05       | 1.49       | 1.36         | 1.74       | 1.86         | 2.52       | 2.75         |
| WHSC1L1 | Wolf-Hirschhorn syndrome   | chr8p11.2            | transcription, DNA-dependent                | ---     | -1.14         | -1.09           | 1.02      | -1.06       | -1.00     | -1.07       | -1.02      | -1.09        | -1.36      | -1.54        | 1.00       | 1.03         |
| WHSC1L1 | Wolf-Hirschhorn syndrome   | chr8p11.2            | transcription, DNA-dependent                | ---     | -1.07         | -1.06           | 1.06      | -1.00       | 1.06      | 1.09        | -1.03      | -1.04        | -1.50      | -1.46        | -1.51      | -1.47        |
| WIF1    | WNT inhibitory factor 1    | chr12q14.3           | regulation of transcription, DNA-depend     | ---     | 1.19          | 1.00            | -1.80     | -1.19       | -1.61     | -1.37       | -1.61      | 1.08         | 2.23       | 2.36         | 3.07       | 2.30         |
| WIPF1   | WAS/WASL interacting pr    | chr2q31.1            | protein complex assembly                    | ---     | 1.04          | 1.00            | 1.03      | 1.17        | 1.07      | -1.04       | 1.13       | -1.05        | 1.21       | 1.06         | 1.38       | 1.19         |
| WIPF1   | WAS/WASL interacting pr    | chr2q31.1            | protein complex assembly                    | ---     | -1.07         | -1.01           | 1.04      | -1.07       | -1.02     | -1.00       | -1.05      | -1.00        | -1.89      | -1.31        | -1.65      | -2.01        |
| WIPF1   | WAS/WASL interacting pr    | chr2q31.1            | protein complex assembly                    | ---     | 1.02          | -1.01           | -1.04     | 1.08        | -1.05     | 1.10        | -1.22      | -1.15        | -1.77      | -1.36        | -1.91      | -1.99        |
| WIPF2   | WAS/WASL interacting pr    | chr17q21.2           | actin cytoskeleton organization             | ---     | -1.12         | -1.07           | -1.10     | -1.19       | 1.14      | 1.09        | 1.11       | -1.00        | 1.10       | 1.31         | 1.31       | 1.33         |
| WIPF2   | WAS/WASL interacting pr    | chr17q21.2           | actin cytoskeleton organization             | ---     | 1.16          | 1.09            | 1.01      | -1.13       | 1.03      | -1.20       | -1.01      | -1.36        | 1.64       | 1.92         | 2.80       | 2.44         |
| WIPF3   | WAS/WASL interacting pr    | chr7p14.3            | multicellular organismal development        | ---     | 2.22          | 1.21            | -1.17     | 1.12        | 1.17      | -1.62       | 2.81       | 2.07         | 2.64       | 1.98         | 4.86       | 3.67         |
| WIPI1   | WD repeat domain, phosph   | chr17q24.2           | autophagic vacuole assembly                 | ---     | 1.22          | 1.27            | 1.07      | -1.05       | -1.07     | 1.02        | -1.16      | -1.16        | 1.47       | 1.48         | 1.46       | 1.64         |
| WIPI1   | WD repeat domain, phosph   | chr17q24.2           | autophagic vacuole assembly                 | ---     | -1.03         | 1.07            | 1.15      | 1.07        | 1.15      | 1.10        | 1.06       | 1.02         | 1.62       | 1.42         | 1.38       | 1.35         |
| WIPI2   | WD repeat domain, phosph   | chr7p22.1            | autophagic vacuole assembly                 | ---     | -1.06         | -1.12           | 1.07      | 1.01        | -1.10     | -1.10       | -1.21      | -1.08        | -1.31      | -1.34        | -1.28      | -1.23        |
| WIPI2   | WD repeat domain, phosph   | chr7p22.1            | autophagic vacuole assembly                 | ---     | -1.05         | -1.09           | 1.39      | 1.24        | -1.07     | -1.03       | -1.25      | 1.03         | -2.07      | -1.66        | -1.39      | -1.34        |
| WIPI2   | WD repeat domain, phosph   | chr7p22.1            | autophagic vacuole assembly                 | ---     | -1.11         | -1.04           | -1.12     | -1.20       | 1.08      | -1.05       | 1.13       | 1.04         | 1.03       | -1.00        | -1.08      | -1.05        |
| WLS     | wntless homolog (Drosophi  | chr1p31.3            | mesoderm formation                          | ---     | 1.00          | -1.04           | 1.01      | 1.04        | -1.01     | 1.02        | -1.10      | -1.05        | -1.33      | -1.15        | -1.22      | -1.27        |
| WLS     | wntless homolog (Drosophi  | chr1p31.3            | mesoderm formation                          | ---     | -1.15         | -1.11           | 1.01      | -1.06       | -1.09     | -1.08       | 1.06       | 1.11         | -1.43      | -1.39        | -1.72      | -1.45        |
| WLS     | wntless homolog (Drosophi  | chr1p31.3            | mesoderm formation                          | ---     | 1.00          | -1.09           | 1.11      | 1.09        | 1.13      | 1.03        | 1.02       | -1.03        | -1.47      | -1.43        | -1.68      | -1.64        |
| WNK1    | WNK lysine deficient prote | chr12p13.3           | positive regulation of systemic arterial bl | ---     | 1.39          | -1.01           | 1.04      | -1.25       | -1.12     | -1.62       | 1.91       | 1.17         | 3.12       | 2.59         | 1.12       | 1.13         |
| WNK1    | WNK lysine deficient prote | chr12p13.3           | positive regulation of systemic arterial bl | ---     | 1.72          | 1.23            | 1.41      | 1.20        | 1.06      | 1.02        | -1.08      | -1.59        | -2.93      | -1.67        | -2.07      | -1.98        |

| ID           | Gene Title                   | Chromosomal Location | 1st Gene Ontology Biological Process        | Pathway                                 | A2497 30 mins | A2497P' 30 mins | A2497 2 h | A2497P' 2 h | A2497 4 h | A2497P' 4 h | A2497 24 h | A2497P' 24 h | A2497 48 h | A2497P' 48 h | A2497 72 h | A2497P' 72 h |
|--------------|------------------------------|----------------------|---------------------------------------------|-----------------------------------------|---------------|-----------------|-----------|-------------|-----------|-------------|------------|--------------|------------|--------------|------------|--------------|
| WNK1         | WNK lysine deficient prote   | chr12p13.3           | positive regulation of systemic arterial bl | ---                                     | 1.46          | 1.33            | 1.56      | 1.19        | 1.31      | 1.77        | -1.22      | -1.54        | -1.84      | -2.03        | -2.15      | -2.07        |
| WNK2         | WNK lysine deficient prote   | chr9q22.3            | protein phosphorylation                     | ---                                     | 1.22          | -1.00           | -1.00     | 1.26        | -1.21     | -1.17       | 1.18       | 1.15         | 2.08       | 1.52         | 1.35       | 1.26         |
| WNK2         | WNK lysine deficient prote   | chr9q22.3            | protein phosphorylation                     | ---                                     | -1.09         | -1.01           | -1.01     | 1.08        | 1.03      | 1.06        | -1.00      | 1.32         | 1.50       | 1.31         | -1.13      | -1.17        |
| WNK4         | WNK lysine deficient prote   | chr17q21-q22         | protein phosphorylation                     | ---                                     | -2.28         | -1.29           | -3.05     | -1.48       | -1.70     | -2.51       | 2.61       | -1.32        | 1.11       | 1.15         | 3.35       | 3.57         |
| WNT11        | wingless-type MMTV integ     | chr11q13.5           | osteoblast differentiation                  | Wnt_signaling // GenMAPP                | 1.18          | 1.12            | -1.73     | 1.10        | -1.59     | -1.75       | -1.30      | 1.16         | 1.07       | 1.11         | 1.51       | 1.80         |
| WNT3         | wingless-type MMTV integ     | chr17q21             | cell morphogenesis                          | Wnt_signaling // GenMAPP                | 1.30          | 1.29            | 1.15      | 1.01        | 1.03      | 1.08        | -1.31      | -1.14        | -2.17      | -1.65        | -1.21      | -1.62        |
| WNT5A        | wingless-type MMTV integ     | chr3p21-p14          | activation of MAPK activity                 | Wnt_signaling // GenMAPP                | 1.14          | 1.21            | -1.22     | -1.15       | -1.19     | -1.05       | -1.19      | -1.11        | -2.21      | -1.96        | -1.85      | -2.54        |
| WNT5A        | wingless-type MMTV integ     | chr3p21-p14          | activation of MAPK activity                 | Wnt_signaling // GenMAPP                | 1.13          | 1.14            | -1.01     | -1.06       | -1.20     | -1.07       | -1.37      | -1.25        | -1.59      | -1.52        | -1.36      | -1.66        |
| WNT7B        | wingless-type MMTV integ     | chr22q13             | in utero embryonic development              | Wnt_signaling // GenMAPP                | 1.33          | -1.05           | 1.34      | 1.43        | 1.21      | -1.30       | -1.16      | 1.08         | 1.95       | 1.20         | 2.28       | 2.09         |
| WNT9A        | wingless-type MMTV integ     | chr1q42              | mitotic cell cycle checkpoint               | ---                                     | -1.10         | -1.16           | -1.11     | -1.21       | 1.01      | 1.05        | -1.15      | -1.12        | -1.66      | -1.67        | -1.57      | -1.19        |
| WRB          | tryptophan rich basic protei | chr21q22.3           | 0                                           | ---                                     | 1.10          | 1.18            | -1.05     | -1.02       | -1.11     | -1.05       | -1.46      | -1.37        | -1.69      | -1.30        | -1.07      | -1.23        |
| WRN          | Werner syndrome, RecQ he     | chr8p12              | telomere maintenance                        | ---                                     | 1.09          | 1.10            | 1.02      | 1.12        | 1.07      | -1.00       | -1.00      | 1.07         | -1.41      | -1.36        | -1.28      | -1.33        |
| WRNIP1       | Werner helicase interacting  | chr6p25.2            | DNA synthesis involved in DNA repair        | ---                                     | -1.06         | 1.07            | -1.02     | 1.57        | -1.20     | -1.03       | 2.33       | 1.57         | 7.22       | 4.47         | 3.29       | 2.79         |
| WT1          | Wilms tumor 1                | chr11p13             | negative regulation of transcription from   | ---                                     | 1.23          | 1.13            | -2.19     | -2.07       | -1.82     | -1.12       | 2.16       | 3.92         | 1.68       | 2.02         | 1.50       | 1.72         |
| WTAP         | Wilms tumor 1 associated     | chr6q25-q27          | mRNA processing                             | ---                                     | 1.03          | 1.01            | -1.07     | -1.08       | 1.10      | 1.01        | 1.27       | 1.00         | 1.11       | -1.18        | -1.04      | -1.35        |
| WTAP         | Wilms tumor 1 associated     | chr6q25-q27          | mRNA processing                             | ---                                     | 1.03          | -1.04           | -1.01     | 1.07        | 1.03      | -1.05       | 1.35       | 1.15         | 1.83       | 1.07         | 1.47       | 1.10         |
| WTAP         | Wilms tumor 1 associated     | chr6q25-q27          | mRNA processing                             | ---                                     | 1.01          | 1.05            | 1.03      | 1.01        | -1.05     | -1.02       | -1.09      | -1.07        | 1.27       | 1.18         | 1.36       | 1.15         |
| WTAP         | Wilms tumor 1 associated     | chr6q25-q27          | mRNA processing                             | ---                                     | 1.04          | 1.10            | -1.07     | -1.04       | -1.14     | -1.01       | -1.17      | -1.06        | 1.17       | 1.25         | 1.26       | 1.11         |
| WWC1         | WW and C2 domain contain     | chr5q34              | transcription, DNA-dependent                | ---                                     | -1.09         | -1.06           | 1.00      | 1.12        | 1.10      | -1.07       | 1.26       | 1.13         | 1.52       | 1.31         | 1.11       | 1.21         |
| WWC1         | WW and C2 domain contain     | chr5q34              | transcription, DNA-dependent                | ---                                     | 1.01          | 1.02            | -1.08     | 1.11        | 1.12      | 1.08        | 1.74       | 1.21         | 1.67       | 1.55         | 1.06       | 1.66         |
| WWC1         | WW and C2 domain contain     | chr5q34              | transcription, DNA-dependent                | ---                                     | 1.01          | 1.17            | 1.05      | -1.23       | 1.09      | 1.10        | 1.31       | 1.07         | 1.47       | 1.41         | 1.08       | 1.09         |
| WWC3         | WWC family member 3          | chrXp22.32           | 0                                           | ---                                     | -1.12         | 1.03            | -1.03     | -1.19       | -1.09     | -1.02       | -1.07      | 1.07         | -1.53      | -1.48        | -1.31      | -1.76        |
| WWC3         | WWC family member 3          | chrXp22.32           | 0                                           | ---                                     | -1.03         | -1.08           | 1.09      | 1.17        | 1.00      | -1.15       | 1.05       | 1.15         | -1.12      | -1.53        | -1.62      | -1.71        |
| WWOX         | WW domain containing ox      | chr16q23.3-q24.1     | osteoblast differentiation                  | ---                                     | -1.16         | -1.10           | 1.24      | 1.16        | -1.21     | -1.11       | 1.01       | 1.07         | -1.47      | -1.53        | -2.47      | -2.74        |
| WWOX         | WW domain containing ox      | chr16q23.3-q24.1     | osteoblast differentiation                  | ---                                     | -1.19         | -1.25           | -1.02     | -1.30       | -1.38     | -1.30       | -1.04      | -1.07        | -1.11      | -1.18        | -3.75      | -2.24        |
| WWOX         | WW domain containing ox      | chr16q23.3-q24.1     | osteoblast differentiation                  | ---                                     | 1.06          | -1.17           | 1.03      | 1.11        | 1.00      | 1.20        | 1.36       | 1.54         | -1.48      | -1.17        | -4.41      | -3.10        |
| WWOX         | WW domain containing ox      | chr16q23.3-q24.1     | osteoblast differentiation                  | ---                                     | 1.39          | -1.15           | 1.07      | -1.60       | 1.29      | 1.13        | -1.16      | -1.44        | -1.91      | -1.25        | -3.12      | -3.32        |
| WWOX         | WW domain containing ox      | chr16q23.3-q24.1     | osteoblast differentiation                  | ---                                     | 1.19          | -1.19           | -1.10     | -1.23       | 1.29      | 1.23        | -1.21      | -1.15        | -1.05      | -1.17        | -1.50      | -1.19        |
| WWP1         | WW domain containing E3      | chr8q21              | cellular protein modification process       | ---                                     | -1.01         | 1.05            | 1.11      | 1.07        | 1.05      | 1.10        | -1.11      | -1.06        | -1.12      | 1.02         | 1.23       | 1.29         |
| WWP2         | WW domain containing E3      | chr16q22.1           | negative regulation of transcription from   | ---                                     | 1.30          | 1.23            | 1.22      | 1.31        | 1.21      | 1.24        | 1.22       | 1.09         | 2.16       | 1.64         | 1.32       | -1.04        |
| WWP2         | WW domain containing E3      | chr16q22.1           | negative regulation of transcription from   | ---                                     | 1.37          | 1.21            | -1.12     | 1.23        | -1.27     | 1.01        | 1.13       | 1.12         | -1.65      | -1.65        | -2.24      | -1.84        |
| WWTR1        | WW domain containing tra     | chr3q23-q24          | negative regulation of transcription from   | ---                                     | -1.05         | -1.06           | -1.04     | -1.10       | 1.28      | 1.14        | 1.24       | 1.14         | 2.38       | 2.15         | 2.37       | 1.94         |
| XAB2         | XPA binding protein 2        | chr19p13.2           | mRNA splicing, via spliceosome              | ---                                     | -1.06         | -1.09           | -1.04     | 1.19        | -1.07     | -1.24       | 1.40       | 1.19         | 1.71       | 1.35         | 1.69       | 1.97         |
| XAF1         | XIAP associated factor 1     | chr17p13.1           | apoptotic process                           | ---                                     | 1.16          | 1.07            | 1.43      | 1.68        | 1.10      | 1.14        | 3.16       | 2.27         | 1.63       | 1.24         | 1.11       | 1.28         |
| XAF1         | XIAP associated factor 1     | chr17p13.1           | apoptotic process                           | ---                                     | -1.04         | 1.07            | 1.12      | 1.49        | 1.49      | 1.33        | 2.11       | 1.86         | 1.46       | -1.14        | -1.85      | -1.45        |
| XBPI1        | X-box binding protein 1      | chr22q12.1/22q12     | epithelial cell maturation                  | ---                                     | -1.15         | 1.34            | 1.05      | 1.02        | 1.54      | 1.54        | -1.04      | -1.01        | -1.66      | -1.16        | -1.59      | -2.36        |
| XLCL1        | chemokine (C motif) ligand   | chr1q23              | positive regulation of T cell mediated cyt  | ---                                     | -1.49         | -1.28           | 1.93      | 3.26        | -1.04     | 1.27        | 1.43       | 3.26         | 1.99       | 1.91         | 1.97       | 2.07         |
| XLCL1 /// XC | chemokine (C motif) ligand   | chr1q23 /// chr1q24  | positive regulation of T cell mediated cyt  | ---                                     | 2.59          | 5.37            | -1.52     | 1.24        | 3.36      | 2.42        | 1.44       | -1.56        | 4.91       | 1.98         | 10.81      | 4.49         |
| XIAP         | X-linked inhibitor of apopt  | chrXq25              | apoptotic process                           | Apoptosis // GenMAPP /// Apoptosis_GenM | -1.07         | -1.11           | 1.19      | 1.20        | 1.35      | 1.03        | 1.14       | 1.01         | 1.35       | 1.06         | 2.27       | 1.22         |
| XIST         | X inactive specific transcri | chrXq13.2            | 0                                           | ---                                     | -1.17         | -4.69           | -1.04     | -7.50       | 1.38      | 2.26        | -1.25      | 1.45         | -1.48      | -1.41        | -1.60      | -1.79        |
| XIST         | X inactive specific transcri | chrXq13.2            | 0                                           | ---                                     | 1.12          | 1.56            | -2.15     | -3.31       | 4.01      | -1.21       | 1.50       | 2.16         | -1.46      | 1.39         | 4.48       | 6.10         |
| XIST         | X inactive specific transcri | chrXq13.2            | 0                                           | ---                                     | 1.28          | 2.41            | 3.38      | 6.00        | -2.61     | -4.17       | 2.38       | 3.82         | 2.07       | -4.32        | -1.63      | -4.01        |
| XIST         | X inactive specific transcri | chrXq13.2            | 0                                           | ---                                     | -2.45         | -1.38           | 1.55      | 1.41        | -1.87     | 1.85        | -1.04      | -1.11        | 1.71       | 1.54         | -1.67      | -1.26        |
| XK           | X-linked Kx blood group      | chrXp21.1            | transport                                   | ---                                     | 1.02          | 1.03            | -1.01     | 1.01        | 1.03      | 1.11        | -1.08      | -1.07        | -1.25      | -1.09        | -1.20      | -1.24        |
| XKR6         | XK, Kell blood group com     | chr8p23.1            | 0                                           | ---                                     | 2.64          | 3.36            | -1.06     | -9.73       | -1.17     | 1.65        | 2.41       | 2.47         | 1.12       | 1.76         | -1.73      | -1.44        |
| XKR8         | XK, Kell blood group com     | chr1p35.3            | engulfment of apoptotic cell                | ---                                     | -1.01         | -1.05           | 1.09      | 1.21        | 1.02      | -1.20       | 1.01       | 1.07         | -1.16      | -1.20        | -1.08      | -1.00        |
| XPA          | xeroderma pigmentosum, c     | chr9q22.3            | nucleotide-excision repair, DNA damage      | ---                                     | -1.08         | -1.09           | 1.03      | 1.11        | -1.05     | -1.09       | 1.16       | 1.30         | -1.29      | -1.43        | -1.21      | -1.18        |
| XPC          | xeroderma pigmentosum, c     | chr3p25              | cell cycle checkpoint                       | ---                                     | 1.03          | -1.12           | 1.05      | 1.10        | 1.11      | 1.04        | 1.02       | 1.12         | -1.39      | -1.61        | -1.34      | -1.18        |
| XPNPEP1      | X-prolyl aminopeptidase      | (chr10q25.3          | proteolysis                                 | ---                                     | -1.00         | -1.04           | 1.03      | 1.10        | -1.02     | 1.04        | 1.12       | 1.04         | 1.22       | 1.28         | -1.03      | 1.02         |
| XPNPEP1      | X-prolyl aminopeptidase      | (chr10q25.3          | proteolysis                                 | ---                                     | -1.38         | -1.38           | 1.10      | -1.07       | 2.57      | 1.75        | 1.00       | 1.21         | 1.40       | -1.06        | 1.43       | 1.62         |
| XPNPEP3      | X-prolyl aminopeptidase      | (chr22q13.2          | glomerular filtration                       | ---                                     | 1.23          | -1.11           | 1.19      | 1.05        | 1.13      | 1.41        | 1.08       | 1.00         | -1.22      | -1.40        | -1.62      | -1.68        |
| XPNPEP3      | X-prolyl aminopeptidase      | (chr22q13.2          | glomerular filtration                       | ---                                     | -1.04         | -1.09           | 1.37      | 1.30        | 1.16      | 1.43        | 1.01       | -1.00        | -1.39      | -1.01        | -1.03      | -1.20        |
| XPNPEP3      | X-prolyl aminopeptidase      | (chr22q13.2          | glomerular filtration                       | ---                                     | 1.02          | 1.00            | -1.03     | -1.30       | 1.04      | 1.02        | -1.12      | -1.35        | -1.11      | -1.04        | 1.20       | 1.23         |
| XPO1         | exportin 1 (CRM1) homolog    | chr2p15              | M phase of mitotic cell cycle               | ---                                     | -1.04         | -1.03           | -1.04     | 1.01        | 1.06      | 1.06        | -1.11      | -1.09        | 1.03       | 1.02         | -1.03      | -1.04        |
| XPO4         | exportin 4                   | chr13q11             | transport                                   | ---                                     | 1.14          | 1.20            | 1.15      | 1.01        | -1.03     | 1.01        | -1.09      | 1.01         | -1.51      | -1.57        | -1.13      | -1.44        |
| XPO4         | exportin 4                   | chr13q11             | transport                                   | ---                                     | 1.05          | -1.00           | -1.05     | 1.09        | 1.06      | -1.03       | 1.45       | 1.35         | 1.44       | 1.12         | 1.69       | 1.68         |
| XPO5         | exportin 5                   | chr6p21.1            | protein export from nucleus                 | ---                                     | -1.20         | -1.20           | -1.01     | -1.02       | 1.13      | -1.05       | 1.20       | 1.10         | 1.37       | 1.33         | 1.55       | 1.80         |
| XPO5         | exportin 5                   | chr6p21.1            | protein export from nucleus                 | ---                                     | 1.07          | 1.06            | -1.04     | 1.01        | 1.09      | 1.02        | 1.03       | 1.05         | -1.78      | -1.58        | -1.39      | -1.43        |
| XPO5         | exportin 5                   | chr6p21.1            | protein export from nucleus                 | ---                                     | -1.01         | -1.02           | 1.08      | 1.11        | 1.35      | 1.25        | 1.35       | 1.33         | -1.83      | -1.49        | -1.24      | -1.24        |
| XPO6         | exportin 6                   | chr16p11.2           | protein export from nucleus                 | ---                                     | 1.00          | 1.02            | 1.08      | 1.00        | 1.07      | 1.02        | 1.10       | -1.02        | 1.28       | 1.11         | 1.15       | 1.11         |
| XPO7         | exportin 7                   | chr8p21              | protein export from nucleus                 | ---                                     | -1.10         | -1.07           | -1.03     | -1.15       | 1.16      | 1.03        | 1.06       | -1.04        | 1.05       | 1.30         | 1.55       | 1.58         |
| XPO7         | exportin 7                   | chr8p21              | protein export from nucleus                 | ---                                     | 1.34          | 1.35            | -1.14     | -1.16       | 1.48      | 1.65        | -1.26      | -1.49        | -1.93      | -1.13        | -4.63      | -4.44        |
| XPR1         | xenotropic and polytropic    | chr1q25.1            | G-protein coupled receptor signaling pat    | ---                                     | 1.21          | 1.62            | -1.91     | -6.62       | 1.61      | 1.22        | 2.00       | 2.47         | -2.21      | -3.25        | -3.09      | -2.59        |
| XPR1         | xenotropic and polytropic    | chr1q25.1            | G-protein coupled receptor signaling pat    | ---                                     | 1.25          | 1.16            | -1.05     | -1.10       | -1.04     | 1.05        | -1.27      | -1.04        | -1.33      | -1.20        | -1.51      | -1.66        |
| XPR1         | xenotropic and polytropic    | chr1q25.1            | G-protein coupled receptor signaling pat    | ---                                     | -1.05         | 1.18            | 1.17      | -1.05       | 1.37      | 1.46        | -1.19      | 1.01         | -1.21      | -1.17        | -2.15      | -2.21        |
| XRCC1        | X-ray repair complementin    | chr19q13.2           | single strand break repair                  | ---                                     | 1.01          | -1.07           | -1.06     | 1.07        | -1.03     | -1.07       | 1.07       | 1.13         | -1.21      | -1.09        | -1.30      | 1.01         |

| ID        | Gene Title                  | Chromosomal Location | 1st Gene Ontology Biological Process      | Pathway                            | A2497 30 mins | A2497P' 30 mins | A2497 2 h | A2497P' 2 h | A2497 4 h | A2497P' 4 h | A2497 24 h | A2497P' 24 h | A2497 48 h | A2497P' 48 h | A2497 72 h | A2497P' 72 h |
|-----------|-----------------------------|----------------------|-------------------------------------------|------------------------------------|---------------|-----------------|-----------|-------------|-----------|-------------|------------|--------------|------------|--------------|------------|--------------|
| XRCC4     | X-ray repair complementing  | chr5q14.2            | in utero embryonic development            | ---                                | -1.07         | -1.02           | 1.05      | 1.17        | -1.03     | 1.16        | -1.03      | 1.11         | 2.54       | 2.47         | 1.62       | 1.91         |
| XRCC4     | X-ray repair complementing  | chr5q14.2            | in utero embryonic development            | ---                                | 1.14          | 1.01            | 1.08      | 1.08        | 1.13      | 1.06        | -1.02      | 1.09         | 1.32       | 1.17         | 1.47       | 1.64         |
| XRCC4     | X-ray repair complementing  | chr5q14.2            | in utero embryonic development            | ---                                | 1.13          | 1.09            | -1.02     | 1.01        | 1.07      | -1.01       | -1.07      | 1.07         | 1.25       | -1.01        | 1.58       | 1.57         |
| XRCC5     | X-ray repair complementing  | chr2q35              | telomere maintenance                      | ---                                | -1.09         | -1.53           | 1.16      | -1.09       | 1.35      | 1.49        | 1.23       | -1.17        | -2.47      | -2.56        | -1.83      | -1.57        |
| XRCC5     | X-ray repair complementing  | chr2q35              | telomere maintenance                      | ---                                | 1.01          | -1.04           | -1.09     | -1.01       | -1.09     | 1.00        | -1.17      | -1.08        | -1.37      | -1.13        | -1.51      | -1.39        |
| XRNI      | 5'-3' exoribonuclease 1     | chr3q23              | nuclear-transcribed mRNA catabolic pro    | ---                                | -1.79         | -1.31           | 2.13      | 1.33        | 1.21      | -1.40       | 1.73       | 1.02         | 2.07       | 1.47         | 5.56       | 2.55         |
| XRNI      | 5'-3' exoribonuclease 1     | chr3q23              | nuclear-transcribed mRNA catabolic pro    | ---                                | 1.29          | 1.42            | -1.11     | 1.03        | 1.06      | 1.04        | -1.54      | -1.60        | -1.92      | -1.59        | -1.94      | -2.21        |
| XRNI      | 5'-3' exoribonuclease 1     | chr3q23              | nuclear-transcribed mRNA catabolic pro    | ---                                | -1.07         | -1.04           | -1.01     | 1.02        | -1.14     | -1.08       | -1.06      | 1.00         | -1.24      | -1.15        | -1.31      | -1.27        |
| XRNI      | 5'-3' exoribonuclease 2     | chr20p11.2-p11.1     | DNA catabolic process, exonucleolytic     | mRNA_processing_Reactome // GenMAP | 1.01          | 1.05            | -1.06     | -1.12       | -1.06     | -1.02       | -1.09      | -1.09        | -1.35      | -1.24        | 1.04       | 1.00         |
| XXYL1     | xyloside xylosyltransferase | chr3q29              | 0                                         | ---                                | -1.07         | -1.14           | 1.10      | 1.27        | 1.17      | -1.08       | -1.00      | 1.12         | 1.23       | 1.19         | -1.51      | -1.26        |
| XYLB      | xytulokinase homolog (H.    | chr3p22-p21.3        | carbohydrate metabolic process            | ---                                | -1.10         | 1.04            | 1.05      | 1.00        | 1.13      | -1.10       | 1.05       | -1.01        | -1.16      | 1.05         | -1.39      | -2.14        |
| XYLB      | xytulokinase homolog (H.    | chr3p22-p21.3        | carbohydrate metabolic process            | ---                                | 1.04          | 1.16            | 1.16      | 1.33        | -1.05     | 1.06        | 1.29       | 1.44         | -2.51      | -2.20        | -3.98      | -3.06        |
| XYLT2     | xylosyltransferase II       | chr17q21.33          | glycosaminoglycan biosynthetic process    | ---                                | -1.05         | -1.06           | -1.01     | 1.08        | -1.13     | -1.10       | 1.19       | 1.18         | 1.63       | 1.49         | 1.45       | 1.41         |
| YAE1D1    | Yae1 domain containing 1    | chr7p14.1            | 0                                         | ---                                | -1.01         | 1.01            | 1.10      | 1.10        | 1.02      | -1.05       | -1.14      | -1.09        | -1.66      | -1.91        | -1.65      | -1.75        |
| YAF2      | YY1 associated factor 2     | chr12q12             | transcription, DNA-dependent              | ---                                | 1.11          | -1.03           | 1.25      | 1.27        | -1.05     | -1.07       | 1.42       | 1.28         | 1.48       | 1.34         | 1.86       | 1.47         |
| YAP1      | Yes-associated protein 1    | chr11q13             | vasculogenesis                            | ---                                | -1.06         | -1.06           | 1.10      | 1.04        | -1.01     | -1.01       | 1.18       | 1.10         | 1.15       | 1.16         | 1.14       | -1.13        |
| YAP1      | Yes-associated protein 1    | chr11q13             | vasculogenesis                            | ---                                | 1.04          | 1.05            | 1.01      | -1.14       | 1.07      | 1.03        | -1.04      | -1.03        | 1.06       | 1.08         | 1.26       | 1.11         |
| YARS      | tyrosyl-tRNA synthetase     | chr1p35.1            | translation                               | ---                                | -1.00         | 1.01            | -1.00     | 1.05        | -1.02     | -1.05       | 1.14       | 1.11         | 1.46       | 1.22         | 1.10       | 1.16         |
| YBX1      | Y box binding protein 1     | chr1p34              | negative regulation of transcription from | ---                                | 2.14          | 1.86            | 1.06      | -7.86       | 6.17      | 3.14        | 1.42       | 1.36         | 4.11       | 3.23         | -1.28      | -1.39        |
| YBX2      | Y box binding protein 2     | chr17p13.1           | regulation of transcription, DNA-depend   | ---                                | 1.15          | -1.06           | -1.11     | -1.80       | 1.25      | 1.11        | -1.06      | -1.09        | -1.32      | -1.11        | 1.25       | 1.37         |
| YEATS2    | YEATS domain containing     | chr3q27.1            | negative regulation of transcription from | ---                                | -1.13         | -1.24           | -1.08     | -1.05       | 1.00      | 1.07        | 1.11       | 1.08         | 1.35       | 1.53         | 1.16       | 1.47         |
| YEATS2    | YEATS domain containing     | chr3q27.1            | negative regulation of transcription from | ---                                | 1.14          | 1.07            | 1.13      | 1.07        | -1.05     | 1.08        | 1.19       | -1.14        | -1.24      | -1.00        | 1.46       | 1.29         |
| YEATS4    | YEATS domain containing     | chr12q13-q15         | transcription, DNA-dependent              | ---                                | 1.26          | 1.34            | 1.15      | 1.07        | 1.07      | 1.05        | -1.03      | 1.09         | -1.58      | -1.54        | -1.27      | -1.34        |
| YES1      | v-yes-1 Yamaguchi sarcom    | chr18p11.31-p11.2    | cellular protein modification process     | ---                                | -2.16         | -1.66           | -1.22     | 1.31        | -4.47     | -3.48       | 2.50       | 2.99         | 6.70       | 1.75         | 1.36       | 2.12         |
| YIF1A     | Yip1 interacting factor hom | chr11q13             | transport                                 | ---                                | -1.04         | -1.12           | -1.07     | -1.01       | 1.01      | -1.08       | 1.09       | 1.14         | 1.36       | 1.17         | 1.78       | 1.85         |
| YIF1B     | Yip1 interacting factor hom | chr19q13.2           | 0                                         | ---                                | 1.38          | 1.12            | -1.16     | -1.07       | 1.12      | 1.01        | 1.44       | 1.54         | -3.66      | -1.68        | -2.77      | -2.29        |
| YIF1B     | Yip1 interacting factor hom | chr19q13.2           | 0                                         | ---                                | -1.03         | -1.07           | 1.03      | 1.05        | -1.06     | 1.02        | 1.13       | 1.11         | 1.49       | 1.63         | 1.55       | 1.82         |
| YIF1B     | Yip1 interacting factor hom | chr19q13.2           | 0                                         | ---                                | 1.04          | 1.00            | 1.01      | 1.04        | -1.04     | -1.04       | 1.06       | -1.03        | 1.56       | 1.45         | 1.43       | 1.63         |
| YIPF1     | Yip1 domain family, mem     | chr1p33-p32.1        | 0                                         | ---                                | -1.18         | -1.09           | 1.05      | 1.05        | 1.03      | -1.07       | -1.23      | -1.04        | 1.43       | 1.17         | 1.15       | 1.18         |
| YIPF2     | Yip1 domain family, mem     | chr19p13.2           | 0                                         | ---                                | 1.28          | 1.04            | 1.39      | 1.41        | 1.26      | 1.72        | 1.00       | -1.11        | 1.13       | 1.26         | 1.54       | 1.70         |
| YIPF2     | Yip1 domain family, mem     | chr19p13.2           | 0                                         | ---                                | -1.05         | -1.07           | 1.03      | 1.03        | 1.09      | 1.03        | 1.15       | 1.00         | 1.47       | 1.25         | 1.47       | 1.52         |
| YIPF2     | Yip1 domain family, mem     | chr19p13.2           | 0                                         | ---                                | 1.04          | -1.07           | 1.15      | 1.05        | 1.00      | 1.12        | 1.18       | -1.09        | 1.62       | 1.41         | 1.42       | 1.49         |
| YIPF4     | Yip1 domain family, mem     | chr2p22.3            | 0                                         | ---                                | 1.06          | -1.16           | 1.33      | 1.14        | 1.10      | 1.12        | -1.22      | -1.12        | -1.23      | -1.21        | 1.31       | -1.18        |
| YIPF4     | Yip1 domain family, mem     | chr2p22.3            | 0                                         | ---                                | 1.12          | 1.07            | 1.09      | 1.07        | -1.31     | 1.01        | -1.29      | -1.06        | 1.16       | -1.01        | 1.44       | 1.21         |
| YIPF4     | Yip1 domain family, mem     | chr2p22.3            | 0                                         | ---                                | -1.05         | -1.13           | -1.16     | -1.79       | -1.55     | -1.91       | -1.15      | -1.09        | -1.91      | -1.27        | -3.20      | -2.21        |
| YIPF5     | Yip1 domain family, mem     | chr5q31.3            | transport                                 | ---                                | 1.16          | 1.08            | 1.03      | 1.02        | 1.00      | 1.04        | -1.31      | -1.08        | 1.13       | 1.12         | 1.35       | 1.29         |
| YIPF5     | Yip1 domain family, mem     | chr5q31.3            | transport                                 | ---                                | -1.08         | -1.06           | -1.08     | 1.01        | 1.01      | -1.02       | -1.05      | -1.05        | 1.09       | 1.14         | 1.38       | 1.51         |
| YIPF5     | Yip1 domain family, mem     | chr5q31.3            | transport                                 | ---                                | -1.14         | -1.25           | 1.06      | -1.03       | 1.20      | 1.15        | -1.10      | -1.09        | 1.12       | 1.15         | 1.34       | 1.49         |
| YIPF5     | Yip1 domain family, mem     | chr5q31.3            | transport                                 | ---                                | -1.06         | -1.03           | 1.03      | -1.09       | -1.07     | -1.02       | 1.01       | 1.07         | 1.09       | 1.19         | 1.14       | 1.12         |
| YIPF6     | Yip1 domain family, mem     | chrXq12              | intestinal epithelial cell development    | ---                                | 1.11          | 1.07            | 1.11      | -1.11       | 1.09      | 1.03        | 1.02       | -1.04        | 1.84       | 1.79         | 2.73       | 2.31         |
| YIPF6     | Yip1 domain family, mem     | chrXq12              | intestinal epithelial cell development    | ---                                | 1.05          | -1.01           | -1.03     | -1.04       | -1.01     | 1.11        | -1.28      | -1.19        | -1.43      | -1.25        | -1.78      | -1.59        |
| YIPF6     | Yip1 domain family, mem     | chrXq12              | intestinal epithelial cell development    | ---                                | 1.02          | 1.01            | -1.02     | -1.12       | 1.02      | 1.08        | 1.05       | 1.01         | 1.13       | 1.26         | 1.36       | 1.24         |
| YKT6      | YKT6 v-SNARE homolog        | chr7p15.1            | transport                                 | ---                                | 1.19          | 1.19            | -1.20     | -1.20       | -1.12     | -1.57       | 1.34       | -1.00        | 2.28       | 2.24         | 2.14       | 1.31         |
| YKT6      | YKT6 v-SNARE homolog        | chr7p15.1            | transport                                 | ---                                | -1.04         | -1.12           | 1.03      | 1.07        | 1.03      | -1.00       | 1.06       | 1.12         | 1.54       | 1.40         | 1.60       | 1.71         |
| YLP1      | YLP motif containing 1      | chr14q24.3           | negative regulation of transcription from | ---                                | 1.09          | -1.00           | -1.05     | 1.12        | -1.23     | -1.18       | 1.66       | 1.20         | -1.20      | -1.30        | -1.88      | -1.52        |
| YLP1      | YLP motif containing 1      | chr14q24.3           | negative regulation of transcription from | ---                                | -1.14         | -1.04           | 1.10      | 1.06        | 1.11      | 1.14        | -1.19      | -1.00        | -1.76      | -2.06        | -1.27      | -1.11        |
| YLP1      | YLP motif containing 1      | chr14q24.3           | regulation of telomere maintenance        | ---                                | -1.21         | -1.26           | 1.23      | 1.29        | 1.10      | 1.04        | -1.08      | -1.23        | -1.85      | -2.71        | -1.75      | -1.93        |
| YLP1      | YLP motif containing 1      | chr14q24.3           | negative regulation of transcription from | ---                                | -1.10         | -1.05           | 1.07      | -1.02       | 1.16      | 1.03        | -1.10      | 1.08         | -1.59      | -1.65        | -1.40      | -1.36        |
| YMEI1L    | YME1-like 1 ATPase          | chr10p14             | proteolysis                               | ---                                | 1.16          | -1.06           | 1.16      | -1.01       | 1.06      | 1.79        | -1.06      | 1.05         | 1.15       | 1.18         | 1.28       | -1.01        |
| YMEI1L    | YME1-like 1 ATPase          | chr10p14             | proteolysis                               | ---                                | 1.23          | 1.15            | 1.04      | -1.05       | -1.00     | 1.04        | 1.11       | 1.15         | 1.03       | 1.07         | 1.49       | 1.43         |
| YMEI1L    | YME1-like 1 ATPase          | chr10p14             | proteolysis                               | ---                                | -1.08         | -1.04           | 1.01      | 1.04        | 1.02      | 1.02        | -1.12      | -1.05        | 1.02       | 1.19         | 1.38       | 1.38         |
| YOD1      | YOD1 deubiquitinase         | chr1q32.2            | proteolysis                               | ---                                | 1.09          | 1.13            | -1.03     | 1.01        | 1.11      | 1.11        | 1.22       | 1.11         | 1.26       | 1.02         | 2.27       | 1.63         |
| YOD1      | YOD1 deubiquitinase         | chr1q32.2            | proteolysis                               | ---                                | 1.15          | -1.23           | 1.35      | -1.33       | -1.65     | 1.05        | 1.41       | 1.65         | -1.75      | -1.23        | 2.44       | 2.15         |
| YPEL1     | yippee-like 1 (Drosophila)  | chr22q11.2           | regulation of myelination                 | ---                                | -1.16         | -1.20           | 1.06      | 1.11        | -1.18     | 1.06        | -1.04      | 1.04         | -1.83      | -2.19        | -1.55      | -1.49        |
| YPEL2     | yippee-like 2 (Drosophila)  | chr17q22             | 0                                         | ---                                | 1.20          | 1.22            | 1.00      | -1.05       | -1.26     | 1.04        | -1.02      | -1.10        | -1.61      | -1.61        | -1.39      | -1.75        |
| YPEL3     | yippee-like 3 (Drosophila)  | chr16p11.2           | 0                                         | ---                                | 1.12          | -1.48           | 1.09      | 1.37        | 1.04      | 1.10        | 1.14       | -1.10        | -1.82      | -1.50        | -1.47      | -1.20        |
| YPEL3     | yippee-like 3 (Drosophila)  | chr16p11.2           | 0                                         | ---                                | 1.17          | 1.07            | 1.01      | 1.30        | 1.07      | -1.03       | 1.11       | 1.14         | -2.62      | -2.26        | -2.05      | -2.02        |
| YPEL5     | yippee-like 5 (Drosophila)  | chr2p23.1            | 0                                         | ---                                | -1.08         | 1.01            | -1.03     | -1.06       | -1.01     | -1.06       | 1.17       | 1.07         | -1.17      | 1.07         | 1.21       | 1.05         |
| YPEL5     | yippee-like 5 (Drosophila)  | chr2p23.1            | 0                                         | ---                                | 1.06          | -1.03           | 1.06      | 1.08        | 1.03      | -1.01       | 1.05       | 1.00         | -1.36      | -1.14        | -1.21      | -1.08        |
| YRDC      | yrnC domain containing 1    | chr1p34.3            | negative regulation of transport          | ---                                | 1.12          | 1.03            | 1.19      | -1.12       | 1.13      | 1.01        | 1.28       | -1.00        | 1.88       | 1.28         | 1.17       | -1.04        |
| YRDC      | yrnC domain containing 1    | chr1p34.3            | negative regulation of transport          | ---                                | 1.05          | 1.09            | 1.04      | -1.03       | 1.09      | 1.04        | 1.06       | -1.09        | 1.57       | 1.40         | 1.08       | 1.30         |
| YTHDC1    | YTH domain containing 1     | chr4q13.2            | mRNA splicing, via spliceosome            | ---                                | -1.07         | -1.07           | 1.18      | 1.22        | 1.10      | 1.16        | 1.16       | -1.13        | 1.22       | 1.12         | 1.32       | 1.15         |
| YTHDC2    | YTH domain containing 2     | chr5q22.2            | 0                                         | ---                                | 1.14          | 1.19            | 1.06      | 1.16        | 1.17      | 1.02        | 1.03       | 1.03         | 1.06       | -1.02        | -1.44      | -1.46        |
| YTHDC2    | YTH domain containing 2     | chr5q22.2            | 0                                         | ---                                | 1.10          | 1.03            | 1.00      | 1.07        | -1.02     | 1.23        | -1.20      | -1.11        | -1.47      | -1.19        | -1.69      | -1.55        |
| YTHDF2    | YTH domain family, mem      | chr1p35              | humoral immune response                   | ---                                | 1.02          | 1.08            | -1.10     | -1.08       | -1.09     | 1.04        | -1.14      | -1.11        | -1.18      | -1.14        | 1.02       | -1.10        |
| YTHDF3-AS | YTHDF3 antisense RNA 1      | chr8q                | 0                                         | ---                                | -1.00         | 1.07            | -1.17     | 1.15        | -1.17     | 1.06        | -1.43      | -1.34        | 1.20       | -1.02        | -1.76      | 1.07         |

| ID           | Gene Title               | Chromosomal Location | 1st Gene Ontology Biological Process      | Pathway                                    | A2497 30 mins | A2497P' 30 mins | A2497 2 h | A2497P' 2 h | A2497 4 h | A2497P' 4 h | A2497 24 h | A2497P' 24 h | A2497 48 h | A2497P' 48 h | A2497 72 h | A2497P' 72 h |
|--------------|--------------------------|----------------------|-------------------------------------------|--------------------------------------------|---------------|-----------------|-----------|-------------|-----------|-------------|------------|--------------|------------|--------------|------------|--------------|
| YWHAB        | tyrosine 3-monooxygenase | chr20q13.1           | MAPK cascade                              | Calcium_regulation_in_cardiac_cells // Gen | -1.07         | -1.02           | -1.02     | -1.00       | 1.01      | -1.01       | 1.14       | 1.06         | 1.18       | 1.20         | -1.17      | -1.10        |
| YWHAB        | tyrosine 3-monooxygenase | chr20q13.1           | MAPK cascade                              | Calcium_regulation_in_cardiac_cells // Gen | 1.01          | 1.03            | 1.03      | -1.11       | 1.01      | 1.02        | -1.07      | -1.06        | -1.30      | -1.12        | -1.67      | -1.82        |
| YWHAB        | tyrosine 3-monooxygenase | chr20q13.1           | MAPK cascade                              | Calcium_regulation_in_cardiac_cells // Gen | -1.21         | -1.11           | -1.07     | -1.00       | -1.01     | -1.08       | 1.06       | 1.05         | 1.10       | 1.03         | -1.26      | -1.24        |
| YWHAE        | tyrosine 3-monooxygenase | chr17p13.3           | G2                                        | ---                                        | -1.08         | -1.06           | -1.19     | -1.10       | -1.04     | -1.07       | 1.00       | -1.03        | 1.15       | 1.06         | -1.03      | -1.05        |
| YWHAQ        | tyrosine 3-monooxygenase | chr2p25.1            | protein targeting                         | Calcium_regulation_in_cardiac_cells // Gen | -1.02         | 1.03            | -1.09     | 1.01        | -1.07     | -1.05       | -1.01      | -1.03        | 1.18       | 1.08         | -1.03      | -1.00        |
| YWHAQ        | tyrosine 3-monooxygenase | chr2p25.1            | protein targeting                         | Calcium_regulation_in_cardiac_cells // Gen | 1.09          | 1.07            | -1.09     | 1.10        | -1.13     | 1.07        | -1.16      | -1.08        | -1.12      | -1.02        | -1.32      | -1.32        |
| YWHAZ        | tyrosine 3-monooxygenase | chr8q23.1            | histamine secretion by mast cell          | ---                                        | 1.04          | 1.25            | 1.16      | 1.14        | -1.00     | 1.51        | -1.17      | -1.03        | -1.19      | 1.02         | -1.90      | -1.78        |
| YY1          | YY1 transcription factor | chr14q               | negative regulation of transcription from | ---                                        | 1.15          | 1.10            | 1.06      | 1.15        | 1.02      | -1.01       | -1.04      | -1.09        | 1.39       | 1.20         | 1.06       | 1.19         |
| 1553372_at   | ---                      | ---                  | 0                                         | ---                                        | 1.36          | -1.21           | -1.36     | -1.02       | 1.08      | -1.08       | -1.11      | -1.15        | 1.68       | 1.31         | -1.45      | -1.06        |
| 1554007_at   | ---                      | ---                  | 0                                         | ---                                        | 1.27          | 1.17            | 1.30      | 1.35        | 1.14      | 1.07        | -1.16      | 1.16         | -2.33      | -1.87        | -2.48      | -2.30        |
| 1554043_a_at | ---                      | ---                  | 0                                         | ---                                        | -1.83         | -1.51           | 1.13      | 1.32        | -1.25     | -1.28       | 1.65       | 1.06         | 1.91       | 1.57         | 1.85       | 1.37         |
| 1554194_at   | ---                      | ---                  | 0                                         | ---                                        | -1.06         | -1.16           | 1.07      | 1.16        | 1.21      | -1.06       | 1.13       | 1.12         | 1.18       | 1.51         | 1.07       | 2.13         |
| 1554219_at   | ---                      | ---                  | 0                                         | ---                                        | 1.67          | 1.80            | 1.00      | -5.62       | 1.13      | -2.02       | -7.03      | -5.35        | 1.23       | 1.36         | 5.08       | 6.33         |
| 1554220_a_at | ---                      | ---                  | 0                                         | ---                                        | 1.16          | -1.10           | 1.05      | 1.32        | 1.68      | 1.57        | -1.24      | -1.11        | 2.13       | 1.51         | 2.60       | 2.74         |
| 1554266_at   | ---                      | ---                  | 0                                         | ---                                        | -1.06         | -1.16           | -1.07     | -1.09       | 1.27      | 1.14        | 1.07       | -1.03        | -1.46      | -1.19        | -2.13      | -1.60        |
| 1554281_at   | ---                      | ---                  | 0                                         | ---                                        | 1.24          | 1.27            | 2.21      | 2.21        | 2.06      | 1.79        | -1.37      | -1.16        | -2.05      | -1.86        | -1.96      | -2.29        |
| 1554448_at   | ---                      | ---                  | 0                                         | ---                                        | -1.01         | -1.11           | 1.16      | 1.22        | 1.06      | 1.14        | 1.21       | 1.09         | -2.29      | -1.75        | -2.36      | -1.98        |
| 1554723_x_at | ---                      | ---                  | 0                                         | ---                                        | -2.63         | 1.25            | -1.08     | -1.19       | 1.34      | 1.26        | 1.54       | 1.71         | 2.04       | 1.64         | 1.18       | 1.32         |
| 1554813_at   | ---                      | ---                  | 0                                         | ---                                        | -1.63         | -1.33           | -1.01     | -2.28       | -2.54     | -2.54       | 1.11       | 2.17         | -1.39      | 1.05         | -1.53      | 1.20         |
| 1554825_at   | ---                      | ---                  | 0                                         | ---                                        | 1.38          | 1.46            | -1.22     | -1.41       | 1.12      | 1.10        | -1.12      | 1.18         | -2.49      | -1.58        | -2.15      | -1.80        |
| 1554865_at   | ---                      | ---                  | 0                                         | ---                                        | -1.00         | -1.03           | 1.09      | 1.23        | 1.09      | 1.25        | -1.58      | -1.15        | 1.23       | -1.21        | 1.28       | 1.09         |
| 1554964_x_at | ---                      | ---                  | 0                                         | ---                                        | 1.20          | 1.42            | 1.03      | 1.05        | 1.01      | 1.10        | 1.43       | 1.19         | -1.43      | 1.04         | -1.98      | -1.43        |
| 1555157_at   | ---                      | ---                  | 0                                         | ---                                        | 2.35          | 4.19            | 1.14      | 1.57        | -1.28     | -1.23       | 1.11       | 1.44         | 1.47       | 1.27         | -1.21      | 1.92         |
| 1555176_at   | ---                      | ---                  | 0                                         | ---                                        | -1.01         | -2.12           | -1.40     | -1.48       | 1.21      | 2.70        | -1.55      | 2.74         | -2.84      | -3.52        | 3.08       | 4.01         |
| 1555186_at   | ---                      | ---                  | cell cycle arrest                         | Cell_cycle_KEGG // GenMAPP // G1_to_S      | 2.46          | 5.32            | -4.50     | -2.31       | -3.74     | -5.42       | 1.17       | 1.55         | 5.68       | 2.50         | 1.00       | -1.90        |
| 1555194_at   | ---                      | ---                  | 0                                         | ---                                        | 1.37          | 1.46            | 1.40      | -1.34       | 1.10      | 1.03        | -1.26      | -1.40        | -3.20      | -1.33        | -1.33      | -2.23        |
| 1555237_at   | ---                      | ---                  | 0                                         | ---                                        | -1.49         | 1.23            | 2.71      | 2.10        | 3.54      | 2.13        | 5.79       | 2.61         | 3.46       | -1.59        | 1.18       | 1.93         |
| 1555261_at   | ---                      | ---                  | 0                                         | ---                                        | -1.07         | -1.51           | 1.31      | 1.57        | 1.39      | 1.40        | -1.43      | -1.27        | -1.60      | -1.17        | -1.91      | -1.26        |
| 1555303_at   | ---                      | ---                  | 0                                         | ---                                        | 1.08          | -1.05           | -1.20     | -1.12       | 1.27      | 1.14        | -1.29      | -1.21        | -1.38      | -1.90        | -1.69      | -2.15        |
| 1555392_at   | ---                      | ---                  | 0                                         | ---                                        | 1.15          | -1.00           | 1.16      | 1.21        | 1.11      | -1.02       | 1.19       | 1.01         | -1.77      | -1.76        | -2.34      | -2.23        |
| 1555461_at   | ---                      | ---                  | 0                                         | ---                                        | -1.13         | -1.10           | -1.04     | 1.07        | 1.09      | -1.00       | -1.03      | 1.06         | -1.39      | -1.63        | -1.75      | -1.54        |
| 1555578_at   | ---                      | ---                  | 0                                         | ---                                        | 1.14          | -1.19           | 1.41      | 1.23        | -1.51     | 1.08        | 1.12       | 1.31         | 1.14       | 1.07         | 1.56       | 1.54         |
| 1555601_at   | ---                      | ---                  | 0                                         | ---                                        | 1.56          | 5.16            | 1.92      | 1.31        | -1.35     | -1.91       | -3.22      | -1.83        | 1.23       | -1.81        | -2.67      | -3.18        |
| 1555710_at   | ---                      | ---                  | 0                                         | ---                                        | 1.26          | 2.41            | -2.80     | -2.69       | -1.15     | -5.36       | -2.95      | -1.26        | -2.74      | 3.39         | 1.29       | -2.39        |
| 1555723_at   | ---                      | ---                  | 0                                         | ---                                        | -1.07         | -1.36           | -1.09     | -1.17       | 1.47      | 1.45        | -1.25      | -1.18        | -2.60      | -2.50        | -1.61      | -1.70        |
| 1555755_at   | ---                      | ---                  | 0                                         | ---                                        | -2.02         | -1.53           | 1.69      | -2.26       | 2.23      | 4.91        | 1.58       | -1.13        | 3.45       | 3.92         | 1.17       | 5.53         |
| 1555845_at   | ---                      | ---                  | 0                                         | ---                                        | 1.11          | 1.03            | 1.16      | 1.25        | -1.17     | 1.03        | -1.08      | -1.09        | -1.54      | -1.51        | -1.47      | -1.45        |
| 1555846_a_at | ---                      | ---                  | 0                                         | ---                                        | 1.01          | 1.00            | 1.03      | 1.07        | 1.05      | 1.10        | 1.03       | -1.17        | -1.55      | -1.50        | -1.31      | -1.20        |
| 1555897_at   | ---                      | ---                  | 0                                         | ---                                        | 1.21          | 1.20            | -1.00     | -1.22       | -1.07     | 1.12        | -1.18      | 1.05         | 1.54       | 1.55         | 1.39       | 1.38         |
| 1555900_at   | ---                      | ---                  | 0                                         | ---                                        | -1.19         | 1.07            | 1.11      | 1.08        | 1.22      | 1.13        | 1.18       | -1.12        | 1.03       | -1.01        | -1.35      | -1.12        |
| 1555967_at   | ---                      | ---                  | 0                                         | ---                                        | 1.30          | 1.07            | -1.22     | 1.01        | -1.27     | 1.01        | 1.15       | 1.47         | -2.00      | -2.08        | -1.09      | -1.09        |
| 1555973_at   | ---                      | ---                  | 0                                         | ---                                        | -1.05         | 1.28            | 1.09      | -1.01       | -1.04     | -1.07       | -1.19      | -1.21        | -2.06      | -1.94        | -1.58      | -1.96        |
| 1555974_a_at | ---                      | ---                  | 0                                         | ---                                        | 1.19          | 1.28            | -1.13     | -1.21       | -1.38     | -1.48       | -1.32      | 1.22         | -1.17      | -1.13        | -1.74      | -1.75        |
| 1556008_a_at | ---                      | ---                  | 0                                         | ---                                        | -1.39         | 1.01            | 3.18      | 2.68        | -1.01     | 1.15        | -1.62      | -1.46        | -2.25      | -2.79        | -2.27      | -3.94        |
| 1556054_at   | ---                      | ---                  | 0                                         | ---                                        | -2.28         | -1.54           | -1.05     | 1.28        | 1.41      | 1.67        | -1.59      | -1.38        | -2.34      | -1.90        | -2.20      | -2.32        |
| 1556078_at   | ---                      | ---                  | 0                                         | ---                                        | -2.01         | -1.28           | 1.33      | -1.06       | -1.00     | -1.49       | 1.15       | 1.09         | 1.60       | 1.37         | 2.23       | 3.35         |
| 1556107_at   | ---                      | ---                  | 0                                         | ---                                        | 1.78          | 1.55            | 1.07      | -1.26       | 1.69      | 1.43        | -1.54      | -1.29        | 1.03       | 1.02         | 1.30       | -1.03        |
| 1556110_at   | ---                      | ---                  | 0                                         | ---                                        | -1.41         | -1.35           | 1.02      | -1.02       | 1.10      | 1.08        | -1.03      | -1.03        | 1.05       | -1.01        | 1.60       | 2.13         |
| 1556111_s_at | ---                      | ---                  | 0                                         | ---                                        | -1.29         | -1.34           | -1.06     | 1.06        | 1.02      | 1.15        | -1.59      | 1.02         | -1.11      | 1.00         | 1.52       | 1.93         |
| 1556126_s_at | ---                      | ---                  | 0                                         | ---                                        | 1.33          | 1.19            | 1.09      | -1.01       | 1.21      | 1.23        | -1.13      | -1.08        | -2.18      | -2.05        | -2.47      | -2.42        |
| 1556138_a_at | ---                      | ---                  | 0                                         | ---                                        | 1.07          | -1.05           | -1.02     | 1.14        | -1.14     | -1.17       | 1.18       | 1.20         | 1.56       | 1.40         | 1.88       | 2.28         |
| 1556172_at   | ---                      | ---                  | 0                                         | ---                                        | 1.03          | 1.03            | 1.04      | 1.09        | 1.09      | -1.00       | -1.02      | -1.24        | -2.31      | -2.02        | -2.02      | -1.76        |
| 1556173_a_at | ---                      | ---                  | 0                                         | ---                                        | -1.09         | -1.17           | 1.10      | 1.19        | 1.07      | -1.09       | -1.01      | 1.09         | -1.87      | -2.09        | -1.79      | -1.18        |
| 1556194_a_at | ---                      | ---                  | 0                                         | ---                                        | -1.01         | -1.18           | 1.16      | 1.03        | 1.12      | 1.29        | -1.33      | 1.03         | -1.53      | -1.14        | -1.57      | -1.57        |
| 1556239_a_at | ---                      | ---                  | 0                                         | ---                                        | -1.09         | -1.04           | -1.00     | 1.38        | -1.26     | 1.23        | -1.24      | 1.24         | -5.24      | -3.83        | -2.81      | -2.08        |
| 1556259_at   | ---                      | ---                  | 0                                         | ---                                        | 1.21          | -1.16           | -1.48     | 1.12        | 1.59      | 2.05        | -3.26      | -2.64        | 1.48       | 1.49         | 1.75       | 1.69         |
| 1556306_at   | ---                      | ---                  | 0                                         | ---                                        | -1.08         | 1.22            | -1.11     | -1.09       | 1.07      | 1.11        | 1.11       | 1.12         | 1.19       | 1.19         | 1.56       | 1.73         |
| 1556331_a_at | ---                      | ---                  | 0                                         | ---                                        | 1.16          | 1.13            | 1.01      | 1.04        | 1.01      | 1.16        | 1.01       | -1.01        | -2.79      | -2.52        | -2.20      | -2.49        |
| 1556332_at   | ---                      | ---                  | 0                                         | ---                                        | 1.38          | 1.62            | -1.00     | -1.02       | -1.21     | -1.09       | 1.29       | 1.05         | 4.17       | 3.70         | 2.61       | 2.49         |
| 1556339_a_at | ---                      | ---                  | 0                                         | ---                                        | -1.43         | 1.10            | -1.38     | 1.07        | 1.56      | 1.51        | 1.23       | 1.00         | -1.07      | -1.64        | -1.94      | -4.45        |
| 1556347_at   | ---                      | ---                  | 0                                         | ---                                        | -1.00         | -1.28           | 1.20      | -1.12       | -1.01     | 1.35        | -1.17      | -1.17        | -4.26      | -3.31        | -2.89      | -3.92        |
| 1556352_at   | ---                      | ---                  | 0                                         | ---                                        | 1.94          | 1.39            | 1.15      | -1.13       | -1.11     | 1.25        | -1.69      | -1.39        | -3.56      | -2.31        | -2.34      | -1.96        |
| 1556375_at   | ---                      | ---                  | 0                                         | ---                                        | 1.34          | -1.01           | 1.09      | 1.11        | 1.15      | 1.21        | 1.25       | 1.26         | -1.90      | -2.02        | -1.47      | -1.50        |
| 1556385_at   | ---                      | ---                  | 0                                         | ---                                        | 1.29          | -1.04           | 1.04      | 1.28        | 1.04      | 1.06        | -1.56      | -1.26        | -2.38      | -2.58        | -2.33      | -1.78        |
| 1556393_at   | ---                      | ---                  | 0                                         | ---                                        | 1.05          | -1.31           | 1.14      | -1.18       | -1.19     | 1.03        | -1.41      | -1.10        | -2.18      | -1.46        | -2.06      | -2.13        |
| 1556394_a_at | ---                      | ---                  | 0                                         | ---                                        | -1.23         | -1.14           | -1.04     | -1.51       | 1.39      | 1.28        | -1.07      | -1.14        | -2.27      | -1.55        | -2.20      | -1.87        |

| ID           | Gene Title | Chromosomal Location | 1st Gene Ontology Biological Process | Pathway | A2497 30 mins | A2497P' 30 mins | A2497 2 h | A2497P' 2 h | A2497 4 h | A2497P' 4 h | A2497 24 h | A2497P' 24 h | A2497 48 h | A2497P' 48 h | A2497 72 h | A2497P' 72 h |
|--------------|------------|----------------------|--------------------------------------|---------|---------------|-----------------|-----------|-------------|-----------|-------------|------------|--------------|------------|--------------|------------|--------------|
| 1556395_at   | ---        | ---                  | 0                                    | ---     | 1.17          | -1.05           | 1.59      | 1.95        | -2.10     | -1.24       | 3.23       | 19.49        | 26.60      | 24.87        | 2.23       | -1.19        |
| 1556416_s_at | ---        | ---                  | 0                                    | ---     | 1.28          | -2.66           | 1.13      | 1.07        | 2.54      | 1.79        | -1.44      | -3.95        | -3.74      | -1.23        | 1.75       | 1.40         |
| 1556434_at   | ---        | ---                  | 0                                    | ---     | 2.28          | 1.78            | 1.02      | -1.14       | 1.75      | 1.08        | -1.21      | -1.07        | -1.60      | -1.70        | 1.08       | 1.32         |
| 1556520_at   | ---        | ---                  | 0                                    | ---     | -2.79         | -1.97           | -1.60     | -1.52       | -1.92     | 1.08        | -1.14      | 1.18         | 12.68      | 2.81         | -2.21      | -1.56        |
| 1556542_a_at | ---        | ---                  | 0                                    | ---     | -1.41         | -1.14           | -1.23     | -1.46       | -1.29     | -1.37       | -1.25      | -1.35        | -2.66      | -1.57        | -2.25      | -1.35        |
| 1556568_a_at | ---        | ---                  | 0                                    | ---     | 1.04          | 1.23            | 1.25      | 1.27        | 1.03      | 1.41        | 1.16       | -1.06        | -1.43      | -1.26        | -2.78      | -2.06        |
| 1556584_at   | ---        | ---                  | 0                                    | ---     | -1.29         | -1.44           | -1.11     | -1.07       | -1.42     | -1.31       | -1.30      | 1.22         | -1.55      | -1.96        | -1.91      | -1.79        |
| 1556586_x_at | ---        | ---                  | 0                                    | ---     | -1.65         | 1.05            | 1.33      | 1.41        | 1.03      | -1.56       | 1.09       | -1.27        | -1.01      | -1.55        | -2.50      | -1.60        |
| 1556694_a_at | ---        | ---                  | 0                                    | ---     | 1.18          | -1.42           | -1.02     | 1.18        | 1.77      | 1.26        | -1.36      | -1.06        | -1.13      | 1.02         | -2.69      | -4.35        |
| 1556763_at   | ---        | ---                  | 0                                    | ---     | 1.08          | 1.60            | 1.15      | 1.14        | 1.01      | 1.35        | 1.04       | 1.10         | -3.10      | -2.25        | -2.81      | -3.78        |
| 1556764_s_at | ---        | ---                  | 0                                    | ---     | 1.29          | 1.11            | 1.04      | 1.04        | 1.36      | 1.29        | -1.14      | -1.46        | -2.97      | -1.98        | -2.39      | -2.76        |
| 1556778_at   | ---        | ---                  | 0                                    | ---     | 1.85          | 1.61            | -1.77     | -1.94       | -1.76     | -2.28       | 1.43       | 3.20         | 2.35       | 8.46         | 3.03       | 4.65         |
| 1556794_at   | ---        | ---                  | 0                                    | ---     | 1.86          | 1.34            | 1.81      | 1.37        | 2.31      | 1.31        | -1.42      | 1.10         | -7.01      | -3.78        | -1.62      | -3.00        |
| 1556812_a_at | ---        | ---                  | 0                                    | ---     | -1.51         | 2.22            | 1.88      | -1.38       | 1.45      | -1.45       | 2.53       | 1.33         | 17.09      | 20.58        | 1.43       | 1.21         |
| 1556817_a_at | ---        | ---                  | 0                                    | ---     | -2.54         | -1.51           | -3.74     | -2.40       | -1.31     | -1.95       | 1.21       | -1.28        | 8.38       | 5.20         | 3.73       | 3.04         |
| 1556818_at   | ---        | ---                  | 0                                    | ---     | -1.14         | -1.36           | -1.26     | 1.13        | 1.10      | 1.31        | 1.01       | -1.08        | -2.88      | -2.15        | -3.48      | -2.95        |
| 1556865_at   | ---        | ---                  | 0                                    | ---     | 1.40          | -1.34           | 1.18      | -1.05       | 1.06      | -1.11       | -2.14      | -1.69        | -2.06      | -2.30        | -1.74      | -1.91        |
| 1556933_at   | ---        | ---                  | 0                                    | ---     | 1.33          | -1.17           | 1.21      | 1.06        | 1.09      | 1.25        | -1.04      | -1.38        | -2.50      | -1.70        | -2.40      | -2.87        |
| 1556935_at   | ---        | ---                  | 0                                    | ---     | 1.40          | 1.28            | -1.10     | -1.31       | 1.09      | 1.26        | 1.10       | 1.02         | -2.48      | -2.47        | -2.02      | -3.45        |
| 1556980_at   | ---        | ---                  | 0                                    | ---     | 1.16          | 4.14            | 1.35      | 1.69        | 1.29      | 4.75        | -2.61      | 2.16         | 4.94       | 7.03         | -3.54      | -2.05        |
| 1556982_at   | ---        | ---                  | 0                                    | ---     | 2.05          | 1.50            | 2.57      | 6.09        | -1.31     | 4.71        | 4.35       | 2.58         | 1.01       | 2.95         | 1.01       | -1.23        |
| 1556984_at   | ---        | ---                  | 0                                    | ---     | 1.10          | -1.51           | -1.13     | -1.06       | 1.90      | 1.37        | 1.17       | 1.30         | -1.93      | -1.58        | -3.52      | -2.89        |
| 1557017_at   | ---        | ---                  | 0                                    | ---     | 2.53          | 2.79            | 1.30      | 1.18        | 1.16      | -2.12       | -3.33      | -1.32        | -3.05      | 1.14         | 4.63       | 4.44         |
| 1557029_at   | ---        | ---                  | 0                                    | ---     | 1.25          | -1.08           | 1.07      | 1.03        | 1.17      | 1.29        | -1.38      | 1.36         | -2.19      | -2.01        | 1.17       | 1.05         |
| 1557147_a_at | ---        | ---                  | 0                                    | ---     | -1.12         | -1.24           | -1.04     | 1.02        | -1.13     | 1.07        | 1.15       | -1.00        | -1.61      | -1.05        | -1.63      | -1.11        |
| 1557195_at   | ---        | ---                  | 0                                    | ---     | -1.14         | 1.02            | 1.93      | 1.90        | -1.82     | -1.07       | -1.90      | 1.26         | -1.65      | 3.51         | 1.67       | 1.67         |
| 1557196_a_at | ---        | ---                  | 0                                    | ---     | -1.41         | 1.38            | -1.86     | -1.33       | -1.22     | 1.38        | 1.04       | 1.14         | 1.06       | 2.74         | 2.24       | 2.62         |
| 1557222_at   | ---        | ---                  | 0                                    | ---     | 1.23          | -1.09           | -1.00     | 1.09        | -1.25     | -1.28       | 1.12       | 1.58         | -1.27      | -1.29        | -2.50      | -1.68        |
| 1557238_s_at | ---        | ---                  | 0                                    | ---     | -1.03         | 1.38            | -1.00     | 1.09        | 1.31      | 1.43        | 1.22       | -1.11        | -2.66      | -2.47        | -2.12      | -2.70        |
| 1557240_a_at | ---        | ---                  | 0                                    | ---     | 1.50          | 1.28            | 1.04      | -1.09       | -1.20     | 1.04        | -1.54      | -1.63        | -1.55      | -1.63        | -2.82      | -2.36        |
| 1557242_at   | ---        | ---                  | 0                                    | ---     | 1.73          | 1.67            | -1.18     | 1.02        | 1.11      | 1.22        | -2.39      | -1.09        | -1.47      | -2.29        | -1.53      | -1.83        |
| 1557256_a_at | ---        | ---                  | 0                                    | ---     | -1.16         | 1.18            | -1.12     | 3.02        | 1.79      | 4.64        | -1.56      | -1.73        | -1.02      | -2.28        | 1.05       | -1.20        |
| 1557295_a_at | ---        | ---                  | 0                                    | ---     | -1.56         | -1.30           | 5.14      | 5.01        | -1.05     | 1.98        | 1.50       | -1.93        | 2.26       | 2.06         | 1.27       | 1.36         |
| 1557301_a_at | ---        | ---                  | 0                                    | ---     | 2.55          | 2.57            | -2.31     | 1.06        | -1.82     | -1.62       | -1.90      | 1.38         | 1.62       | 1.46         | -1.09      | -1.47        |
| 1557315_a_at | ---        | ---                  | 0                                    | ---     | 1.14          | 1.15            | 1.16      | 1.75        | -1.31     | -1.14       | 1.06       | -1.28        | -2.10      | -1.76        | -1.70      | -1.89        |
| 1557325_at   | ---        | ---                  | 0                                    | ---     | 1.57          | 1.98            | -1.05     | 1.10        | -1.32     | -1.70       | 1.75       | 1.61         | 1.23       | 1.12         | 1.04       | 1.03         |
| 1557329_at   | ---        | ---                  | 0                                    | ---     | -1.36         | -1.55           | -1.05     | -1.97       | 1.07      | -1.82       | -2.39      | -1.80        | -2.01      | 1.83         | -1.11      | -1.74        |
| 1557375_at   | ---        | ---                  | 0                                    | ---     | -1.31         | -1.21           | 1.60      | 1.28        | 1.19      | 1.10        | 1.25       | -1.02        | -1.51      | -1.77        | -3.83      | -2.04        |
| 1557383_a_at | ---        | ---                  | 0                                    | ---     | 1.24          | 1.11            | 1.03      | 1.16        | -1.10     | 1.08        | -1.39      | -1.25        | -1.70      | -1.27        | -2.58      | -2.82        |
| 1557409_at   | ---        | ---                  | 0                                    | ---     | 1.15          | 1.18            | -1.01     | -1.16       | 1.19      | 1.09        | 1.11       | 1.00         | -1.96      | -1.45        | -1.27      | -1.42        |
| 1557433_at   | ---        | ---                  | 0                                    | ---     | 1.04          | 1.06            | -1.16     | -1.11       | 1.13      | -1.03       | -1.40      | -1.08        | -1.42      | -1.52        | -2.12      | -2.08        |
| 1557437_a_at | ---        | ---                  | 0                                    | ---     | -1.56         | -1.10           | -1.45     | -1.06       | -1.13     | 1.06        | -1.10      | 1.15         | -2.76      | -1.54        | -3.73      | -3.68        |
| 1557439_at   | ---        | ---                  | 0                                    | ---     | -1.64         | -5.04           | 6.27      | -1.71       | -1.66     | -3.01       | 1.83       | 4.22         | 7.94       | 3.48         | 1.68       | 2.27         |
| 1557468_at   | ---        | ---                  | 0                                    | ---     | 1.80          | 1.03            | 1.33      | -1.22       | -1.60     | -2.48       | 2.53       | -1.17        | -1.09      | -2.08        | 1.15       | -1.09        |
| 1557487_at   | ---        | ---                  | 0                                    | ---     | 1.08          | 1.02            | -1.10     | -1.01       | -1.15     | -1.08       | -1.21      | 1.35         | -1.87      | -1.92        | -2.53      | -2.53        |
| 1557495_at   | ---        | ---                  | 0                                    | ---     | 1.16          | 1.18            | -2.58     | -1.12       | -1.03     | 1.44        | 1.04       | -1.30        | 3.13       | 2.50         | 1.47       | 1.75         |
| 1557515_at   | ---        | ---                  | 0                                    | ---     | -1.42         | -2.00           | -1.08     | -2.65       | 1.20      | -1.39       | -11.42     | -3.14        | 1.34       | -1.78        | -1.37      | -2.75        |
| 1557521_a_at | ---        | ---                  | 0                                    | ---     | 1.03          | 1.04            | -1.12     | 1.04        | 1.29      | 1.42        | -1.45      | -1.07        | -2.40      | -1.75        | -3.14      | -3.27        |
| 1557522_x_at | ---        | ---                  | 0                                    | ---     | 1.39          | 1.54            | -1.09     | -1.01       | 1.21      | 1.17        | -1.25      | -1.05        | -2.41      | -2.11        | -3.43      | -3.19        |
| 1557539_at   | ---        | ---                  | 0                                    | ---     | -1.07         | -1.06           | 1.02      | 1.02        | -1.06     | 1.19        | -1.09      | -1.52        | -1.62      | -1.86        | -2.16      | -1.24        |
| 1557555_at   | ---        | ---                  | 0                                    | ---     | 1.15          | 1.12            | 1.47      | 1.43        | 1.21      | 1.60        | -1.73      | -1.22        | -1.09      | -1.66        | -1.40      | -2.04        |
| 1557637_at   | ---        | ---                  | 0                                    | ---     | -2.05         | -1.70           | -1.65     | -2.38       | 1.04      | 1.36        | 1.31       | -1.01        | 1.18       | 1.37         | 1.72       | 1.32         |
| 1557638_at   | ---        | ---                  | 0                                    | ---     | 1.94          | 1.79            | 1.12      | 1.29        | -1.51     | -1.45       | -1.23      | 1.26         | -1.39      | -1.92        | -1.21      | -1.34        |
| 1557658_at   | ---        | ---                  | 0                                    | ---     | 1.01          | -3.97           | -1.48     | 1.20        | 2.10      | 1.44        | -2.94      | -1.41        | -1.69      | 1.75         | -5.01      | -7.75        |
| 1557667_at   | ---        | ---                  | 0                                    | ---     | 1.32          | 1.56            | -1.18     | -1.06       | 1.08      | 1.15        | -1.05      | -1.38        | -2.00      | -1.77        | -1.43      | -1.33        |
| 1557689_at   | ---        | ---                  | 0                                    | ---     | -2.33         | -1.40           | 1.19      | -1.14       | 1.01      | -1.01       | 5.94       | 3.31         | -2.93      | -2.93        | -1.20      | -13.40       |
| 1557713_at   | ---        | ---                  | 0                                    | ---     | 1.42          | 1.22            | 2.39      | 1.70        | 1.04      | 1.29        | -2.00      | -1.44        | -1.98      | -6.66        | -1.16      | 2.17         |
| 1557797_a_at | ---        | ---                  | 0                                    | ---     | 1.04          | -1.43           | -1.21     | 1.09        | 1.06      | 1.26        | 1.32       | 1.16         | -1.92      | -1.66        | -1.94      | -1.24        |
| 1557809_a_at | ---        | ---                  | 0                                    | ---     | 1.43          | -1.19           | 1.02      | -1.06       | 1.31      | 1.58        | 1.76       | -1.02        | -1.34      | -1.42        | -2.38      | -2.08        |
| 1557812_a_at | ---        | ---                  | 0                                    | ---     | 1.99          | 1.30            | 1.14      | -1.02       | 1.06      | 1.09        | -1.49      | -1.57        | -3.97      | -2.44        | -2.33      | -2.11        |
| 1557813_at   | ---        | ---                  | 0                                    | ---     | 1.02          | -1.22           | -1.09     | 1.28        | 1.06      | -1.03       | -1.20      | -1.35        | -1.75      | -2.54        | -2.49      | -1.56        |
| 1557814_a_at | ---        | ---                  | 0                                    | ---     | 1.68          | 1.66            | 2.55      | 1.45        | 1.05      | -1.13       | 1.45       | 1.43         | -1.90      | -1.26        | -3.95      | -1.78        |
| 1557816_a_at | ---        | ---                  | 0                                    | ---     | -2.06         | -2.05           | -2.03     | 1.68        | -1.40     | 1.31        | -1.28      | -3.38        | -2.16      | -1.04        | -3.34      | -2.05        |
| 1557987_at   | ---        | ---                  | 0                                    | ---     | 1.11          | 1.56            | 1.28      | -1.06       | 1.07      | 1.12        | -1.46      | -1.02        | -2.11      | -1.63        | -1.68      | -2.48        |
| 1558078_at   | ---        | ---                  | 0                                    | ---     | 1.01          | 1.03            | -1.12     | -1.30       | 1.02      | 1.08        | 1.48       | -1.09        | -1.93      | -2.09        | -2.12      | -1.95        |
| 1558102_at   | ---        | ---                  | 0                                    | ---     | 1.13          | 1.22            | 1.17      | 1.43        | 1.05      | -1.01       | 1.02       | -1.01        | 1.15       | 1.08         | -1.71      | -1.36        |

| ID           | Gene Title | Chromosomal Location | 1st Gene Ontology Biological Process | Pathway | A2497 30 mins | A2497P' 30 mins | A2497 2 h | A2497P' 2 h | A2497 4 h | A2497P' 4 h | A2497 24 h | A2497P' 24 h | A2497 48 h | A2497P' 48 h | A2497 72 h | A2497P' 72 h |
|--------------|------------|----------------------|--------------------------------------|---------|---------------|-----------------|-----------|-------------|-----------|-------------|------------|--------------|------------|--------------|------------|--------------|
| 1558103_a_at | ---        | ---                  | 0                                    | ---     | 1.12          | -1.03           | 1.07      | 1.08        | -1.21     | -1.08       | -1.07      | 1.07         | 1.08       | -1.00        | -1.75      | -1.31        |
| 1558193_at   | ---        | ---                  | 0                                    | ---     | -1.45         | -1.39           | -1.65     | 1.01        | -1.35     | -1.41       | -1.38      | 1.09         | -2.65      | -2.13        | -1.59      | -1.46        |
| 1558208_at   | ---        | ---                  | 0                                    | ---     | -1.23         | -1.08           | -1.02     | -1.08       | 1.02      | 1.07        | 1.64       | 1.49         | 4.54       | 4.04         | 3.21       | 2.78         |
| 1558236_at   | ---        | ---                  | 0                                    | ---     | -1.04         | -1.00           | -1.02     | 1.02        | 1.11      | 1.17        | -1.10      | -1.03        | -1.90      | -1.83        | -6.16      | -4.50        |
| 1558237_x_at | ---        | ---                  | 0                                    | ---     | -1.01         | -1.00           | -1.07     | -1.13       | -1.08     | 1.00        | -1.02      | -1.17        | -1.92      | -1.66        | -5.85      | -3.96        |
| 1558343_at   | ---        | ---                  | 0                                    | ---     | 1.07          | 1.02            | 3.46      | -1.91       | 1.50      | 1.34        | -1.00      | -2.72        | -1.18      | 1.21         | 1.03       | 1.60         |
| 1558348_at   | ---        | ---                  | 0                                    | ---     | -1.19         | -1.55           | 2.22      | 1.46        | 1.10      | 1.08        | -1.21      | -2.82        | -2.73      | -1.65        | -1.26      | -1.10        |
| 1558385_at   | ---        | ---                  | 0                                    | ---     | 1.60          | 1.76            | -1.07     | -1.48       | 1.00      | -1.06       | 1.15       | -1.10        | -4.23      | -4.26        | -3.29      | -2.18        |
| 1558409_at   | ---        | ---                  | 0                                    | ---     | 2.93          | 2.17            | 1.32      | 1.23        | 1.53      | 1.04        | 1.22       | 1.08         | -3.38      | -2.11        | -3.15      | -2.57        |
| 1558410_s_at | ---        | ---                  | 0                                    | ---     | 1.84          | 1.39            | 1.23      | 1.07        | 1.29      | 1.05        | -1.09      | -1.07        | -2.23      | -2.17        | -2.55      | -2.21        |
| 1558444_at   | ---        | ---                  | 0                                    | ---     | 1.02          | -1.14           | 1.10      | 1.17        | 1.10      | -1.06       | -1.29      | -1.52        | -1.68      | -1.78        | -1.82      | -1.42        |
| 1558447_at   | ---        | ---                  | 0                                    | ---     | 2.39          | 1.18            | 1.12      | 1.22        | -1.16     | -1.04       | 1.87       | 1.47         | -4.08      | -2.13        | -1.17      | 2.17         |
| 1558494_at   | ---        | ---                  | 0                                    | ---     | -2.05         | -1.26           | -1.40     | -1.10       | -3.08     | -4.39       | 5.64       | 1.24         | 3.14       | 5.39         | 3.16       | 4.12         |
| 1558522_at   | ---        | ---                  | 0                                    | ---     | 1.47          | 1.18            | -1.13     | -1.13       | -1.04     | 1.09        | -1.14      | -1.10        | -2.47      | -2.09        | -1.63      | -2.17        |
| 1558525_at   | ---        | ---                  | 0                                    | ---     | 1.07          | -1.00           | -1.33     | 1.06        | 1.33      | 1.22        | 1.63       | 1.26         | 1.55       | 1.06         | -1.16      | 1.63         |
| 1558624_at   | ---        | ---                  | 0                                    | ---     | 1.96          | 1.25            | 1.46      | -1.01       | 1.59      | 1.67        | -1.59      | -1.21        | -1.25      | -2.09        | -1.74      | -1.29        |
| 1558626_at   | ---        | ---                  | 0                                    | ---     | -1.25         | -1.08           | 1.21      | 1.16        | 1.17      | -1.24       | -1.26      | -1.39        | -5.48      | -3.01        | -1.60      | -2.24        |
| 1558672_at   | ---        | ---                  | 0                                    | ---     | -1.08         | 1.03            | -1.15     | 1.05        | 1.22      | 1.30        | -1.12      | -1.13        | -1.61      | -1.11        | -3.36      | -3.13        |
| 1558739_at   | ---        | ---                  | 0                                    | ---     | 1.21          | 1.10            | -1.38     | 1.07        | -1.07     | 1.30        | -1.67      | -1.00        | -1.61      | -1.11        | -1.72      | -1.53        |
| 1558740_s_at | ---        | ---                  | 0                                    | ---     | -1.03         | -1.13           | -1.00     | 1.14        | 1.06      | 1.08        | -1.37      | -1.01        | -1.36      | -1.26        | -1.57      | -1.48        |
| 1558748_at   | ---        | ---                  | 0                                    | ---     | 1.09          | 1.58            | 1.19      | 1.58        | 1.51      | 1.28        | 1.26       | 1.31         | -2.69      | -1.85        | -9.84      | -2.83        |
| 1558758_s_at | ---        | ---                  | 0                                    | ---     | -1.49         | -1.01           | -1.82     | 1.07        | -1.09     | 1.13        | 1.75       | 1.56         | 2.20       | 1.75         | 1.25       | 1.43         |
| 1558760_at   | ---        | ---                  | 0                                    | ---     | 1.07          | -1.14           | -1.09     | -1.15       | 1.41      | 1.20        | -1.25      | 1.05         | -2.36      | -2.21        | -1.27      | -1.10        |
| 1558783_at   | ---        | ---                  | 0                                    | ---     | 1.03          | -1.09           | 1.01      | 1.15        | 1.07      | 1.51        | -1.13      | -1.12        | 1.39       | 1.31         | -1.03      | 1.29         |
| 1558806_at   | ---        | ---                  | 0                                    | ---     | 2.15          | 2.43            | -1.79     | -1.70       | -1.55     | -1.31       | -1.22      | 1.13         | 2.09       | 2.01         | 5.11       | 2.55         |
| 1558822_at   | ---        | ---                  | 0                                    | ---     | 1.03          | 1.65            | -1.76     | -1.81       | -1.16     | 1.03        | -1.85      | -1.52        | -3.82      | -4.06        | -3.23      | -2.55        |
| 1558831_x_at | ---        | ---                  | 0                                    | ---     | -1.38         | -1.10           | 1.10      | 1.04        | -1.53     | 1.16        | -1.30      | -1.08        | -1.88      | -2.23        | -1.66      | -1.30        |
| 1558836_at   | ---        | ---                  | 0                                    | ---     | 1.35          | 1.34            | 1.08      | 1.03        | 1.14      | 1.07        | 1.78       | 1.21         | -1.51      | -1.27        | -1.91      | -1.16        |
| 1558837_a_at | ---        | ---                  | 0                                    | ---     | 1.24          | 1.13            | -1.02     | -1.01       | 1.33      | 1.41        | -1.13      | -1.02        | -1.17      | 1.11         | -1.49      | -1.62        |
| 1558854_a_at | ---        | ---                  | 0                                    | ---     | 1.48          | 1.01            | 1.24      | 1.07        | -1.38     | 1.06        | -1.31      | -1.03        | -2.05      | -2.27        | -1.75      | -1.12        |
| 1558869_at   | ---        | ---                  | 0                                    | ---     | 14.35         | 9.54            | -1.67     | -1.10       | -1.74     | 1.34        | -1.06      | 1.29         | -1.42      | 3.34         | -1.44      | -3.14        |
| 1558871_at   | ---        | ---                  | 0                                    | ---     | 2.32          | -1.25           | 2.23      | 1.48        | 1.08      | 1.12        | 1.92       | 1.41         | 3.63       | 2.77         | 2.44       | 3.00         |
| 1558877_at   | ---        | ---                  | 0                                    | ---     | -1.98         | -2.66           | 1.26      | 1.15        | 1.19      | 1.31        | -1.15      | -1.00        | -1.92      | -1.02        | -2.07      | -1.91        |
| 1558889_at   | ---        | ---                  | 0                                    | ---     | 1.70          | 1.97            | 1.13      | -2.15       | 1.48      | -1.72       | -1.04      | -1.11        | -2.11      | -1.73        | -1.12      | -7.27        |
| 1558922_at   | ---        | ---                  | 0                                    | ---     | 1.16          | -1.01           | 1.17      | -1.08       | 1.12      | 1.31        | -1.32      | 1.11         | -5.13      | -3.83        | -2.94      | -2.44        |
| 1558947_at   | ---        | ---                  | 0                                    | ---     | 1.08          | 1.06            | 1.10      | 1.09        | -1.11     | -1.09       | -1.41      | -1.29        | -1.81      | -1.47        | -1.10      | -1.23        |
| 1558948_a_at | ---        | ---                  | 0                                    | ---     | 1.31          | 1.22            | 1.31      | -1.02       | 1.03      | 1.12        | -1.21      | -1.08        | -2.46      | -1.36        | -1.15      | -1.10        |
| 1559006_at   | ---        | ---                  | 0                                    | ---     | 1.21          | 1.10            | 1.02      | 1.06        | 1.01      | 1.09        | -1.35      | -1.22        | -2.32      | -1.93        | -2.42      | -2.08        |
| 1559007_s_at | ---        | ---                  | 0                                    | ---     | 1.02          | -1.01           | 1.09      | 1.20        | 1.02      | 1.00        | -1.13      | 1.07         | -2.11      | -1.85        | -2.26      | -1.92        |
| 1559063_at   | ---        | ---                  | 0                                    | ---     | 1.94          | 2.19            | 1.13      | 1.01        | 1.20      | 1.12        | 1.38       | 1.32         | -1.60      | -3.88        | -1.47      | -1.68        |
| 1559086_at   | ---        | ---                  | 0                                    | ---     | -1.16         | 1.11            | 1.26      | 2.00        | -1.02     | 1.02        | -1.44      | -1.86        | -4.42      | -2.55        | -5.97      | -4.31        |
| 1559116_s_at | ---        | ---                  | 0                                    | ---     | -1.18         | -1.12           | 1.47      | -1.05       | 1.20      | 1.24        | -1.23      | -1.35        | -2.32      | -1.87        | -1.84      | -1.69        |
| 1559119_at   | ---        | ---                  | 0                                    | ---     | -1.15         | -1.40           | 2.01      | 1.75        | -1.03     | 1.01        | -1.10      | -1.01        | -1.74      | -1.73        | -2.18      | -1.80        |
| 1559154_at   | ---        | ---                  | 0                                    | ---     | -1.04         | -1.58           | 1.31      | 1.14        | 1.10      | 1.28        | 1.02       | -1.01        | 1.15       | 1.33         | 1.30       | 1.07         |
| 1559156_at   | ---        | ---                  | 0                                    | ---     | 1.20          | 1.04            | 1.13      | 1.12        | 1.23      | 1.26        | 1.06       | -1.06        | -2.61      | -2.98        | -1.97      | -2.11        |
| 1559214_at   | ---        | ---                  | 0                                    | ---     | 1.03          | 1.01            | 1.04      | 1.10        | 1.04      | 1.28        | -1.60      | -1.16        | -1.80      | -1.17        | -2.09      | -2.19        |
| 1559252_a_at | ---        | ---                  | 0                                    | ---     | -1.68         | -1.00           | -1.21     | -1.38       | -1.90     | -1.88       | -1.07      | 1.20         | 1.35       | 1.29         | -2.61      | -1.76        |
| 1559255_a_at | ---        | ---                  | 0                                    | ---     | 2.28          | 2.30            | -1.41     | 1.10        | -2.20     | -2.67       | -1.08      | 1.29         | 3.07       | 1.51         | -1.74      | -2.22        |
| 1559278_at   | ---        | ---                  | 0                                    | ---     | 1.47          | 1.55            | -2.05     | -1.25       | 2.07      | 3.95        | -10.46     | -6.76        | 2.62       | 3.75         | -2.30      | 1.51         |
| 1559284_at   | ---        | ---                  | 0                                    | ---     | -1.17         | -1.11           | 1.35      | -1.02       | 1.13      | -1.08       | -1.24      | -1.70        | -1.74      | -2.38        | -1.85      | -2.31        |
| 1559287_at   | ---        | ---                  | 0                                    | ---     | 1.94          | 1.51            | -3.22     | -1.03       | -1.70     | -1.42       | -1.32      | 1.98         | 3.53       | 3.23         | -1.51      | 1.20         |
| 1559310_at   | ---        | ---                  | 0                                    | ---     | -1.01         | 1.05            | 1.17      | 1.03        | 1.18      | 1.16        | -1.40      | -1.25        | 1.31       | 1.44         | 1.31       | 1.56         |
| 1559331_x_at | ---        | ---                  | 0                                    | ---     | -1.47         | -1.12           | 1.10      | 1.29        | 1.07      | 1.20        | 1.15       | 1.61         | 1.05       | -1.25        | -2.66      | -1.76        |
| 1559336_at   | ---        | ---                  | 0                                    | ---     | 1.58          | 1.88            | -3.91     | -1.51       | 2.15      | 2.52        | -3.61      | 1.36         | 1.36       | 1.44         | 1.44       | -3.27        |
| 1559351_at   | ---        | ---                  | 0                                    | ---     | 1.02          | -1.25           | -1.40     | 1.23        | 3.10      | 4.60        | -5.36      | -1.74        | 2.39       | 1.52         | 2.42       | -1.23        |
| 1559360_at   | ---        | ---                  | 0                                    | ---     | -1.23         | -1.02           | -1.13     | -1.12       | -1.21     | 1.17        | -1.16      | 1.17         | -2.16      | -1.93        | -1.21      | -1.90        |
| 1559384_at   | ---        | ---                  | 0                                    | ---     | 1.13          | -1.02           | 1.02      | 1.28        | 1.22      | 1.31        | -1.26      | -1.29        | -1.75      | -1.43        | -2.11      | -1.46        |
| 1559401_a_at | ---        | ---                  | 0                                    | ---     | -1.33         | -1.41           | 1.11      | -1.04       | 1.47      | 1.31        | 1.31       | 1.12         | -2.71      | -3.53        | -2.12      | -1.80        |
| 1559426_at   | ---        | ---                  | 0                                    | ---     | 1.20          | 1.77            | -3.14     | -2.54       | 2.26      | 1.24        | -1.28      | -1.45        | -1.45      | -1.95        | -3.22      | -2.33        |
| 1559437_at   | ---        | ---                  | 0                                    | ---     | 1.26          | 1.74            | -1.17     | -1.20       | 1.15      | 1.10        | 1.28       | 1.01         | -1.73      | -1.05        | -1.99      | -1.78        |
| 1559444_at   | ---        | ---                  | 0                                    | ---     | -1.04         | -1.01           | -1.00     | -1.05       | 1.10      | 1.05        | -1.17      | -1.13        | -2.18      | -1.93        | -1.27      | -1.82        |
| 1559508_at   | ---        | ---                  | 0                                    | ---     | 1.12          | 1.03            | -1.40     | -1.09       | -1.56     | -1.48       | 1.13       | -1.48        | -3.40      | -2.12        | -2.86      | -2.40        |
| 1559526_at   | ---        | ---                  | 0                                    | ---     | 7.80          | 5.84            | -1.33     | -1.15       | -1.04     | 1.98        | 3.69       | 2.89         | 1.41       | 1.38         | 1.15       | 1.21         |
| 1559530_at   | ---        | ---                  | 0                                    | ---     | 1.16          | 1.17            | 1.19      | -1.07       | 1.11      | 1.00        | 1.15       | -1.03        | 1.05       | -1.05        | 1.67       | 1.41         |
| 1559589_a_at | ---        | ---                  | 0                                    | ---     | 1.02          | 1.02            | -1.13     | -1.17       | 1.20      | 1.19        | -1.20      | 1.28         | 1.36       | 1.63         | 2.02       | 2.40         |
| 1559598_at   | ---        | ---                  | 0                                    | ---     | 1.17          | -1.47           | 1.09      | -1.10       | 1.92      | 2.40        | -1.20      | -1.55        | -2.47      | -3.65        | -1.86      | -2.02        |

| ID           | Gene Title | Chromosomal Location | 1st Gene Ontology Biological Process | Pathway | A2497 30 mins | A2497P' 30 mins | A2497 2 h | A2497P' 2 h | A2497 4 h | A2497P' 4 h | A2497 24 h | A2497P' 24 h | A2497 48 h | A2497P' 48 h | A2497 72 h | A2497P' 72 h |
|--------------|------------|----------------------|--------------------------------------|---------|---------------|-----------------|-----------|-------------|-----------|-------------|------------|--------------|------------|--------------|------------|--------------|
| 1559653_at   | ---        | ---                  | 0                                    | ---     | 2.81          | 1.54            | 2.78      | 1.68        | 4.15      | 3.41        | 1.87       | 1.79         | -2.08      | -1.05        | -6.39      | 1.36         |
| 1559723_s_at | ---        | ---                  | 0                                    | ---     | 1.11          | 1.59            | 1.14      | 1.12        | 1.58      | 1.76        | -1.63      | 1.14         | -2.12      | -1.67        | -1.54      | -1.95        |
| 1559776_at   | ---        | ---                  | 0                                    | ---     | -1.10         | 1.07            | 1.33      | 1.10        | 1.47      | 1.50        | -1.51      | -1.41        | -1.74      | -1.22        | -1.81      | -1.53        |
| 1559814_at   | ---        | ---                  | 0                                    | ---     | 1.52          | 2.22            | 2.51      | 3.05        | 1.19      | 2.02        | 1.07       | 1.70         | -1.97      | -2.13        | -2.58      | -1.07        |
| 1559837_at   | ---        | ---                  | 0                                    | ---     | 1.70          | 1.51            | 1.36      | -1.82       | -2.53     | 1.28        | 1.44       | 2.67         | 5.47       | 5.26         | -2.11      | 1.09         |
| 1559843_s_at | ---        | ---                  | 0                                    | ---     | 2.21          | 3.73            | -1.85     | 2.40        | 2.44      | 1.57        | 1.95       | 1.86         | -1.51      | -1.96        | 3.47       | 4.91         |
| 1559867_at   | ---        | ---                  | 0                                    | ---     | -1.32         | -1.12           | 1.74      | 1.44        | 1.17      | 1.18        | -1.40      | 1.07         | -2.74      | -1.79        | -1.43      | -1.49        |
| 1559916_a_at | ---        | ---                  | 0                                    | ---     | 1.89          | 1.38            | 1.19      | 1.43        | -2.01     | -1.48       | -1.82      | 2.10         | -3.52      | -3.60        | -1.31      | -1.99        |
| 1559936_at   | ---        | ---                  | 0                                    | ---     | -1.29         | -1.34           | -1.02     | -1.11       | 1.05      | -1.08       | -1.09      | 1.06         | -1.71      | -1.67        | -1.57      | -1.16        |
| 1560026_at   | ---        | ---                  | 0                                    | ---     | 1.06          | -1.12           | 1.11      | 1.07        | 1.39      | -1.28       | -1.37      | 1.19         | -2.13      | -2.56        | -1.04      | -1.83        |
| 1560048_at   | ---        | ---                  | 0                                    | ---     | 1.01          | 1.02            | 1.06      | -1.16       | 1.18      | 1.16        | -1.25      | -1.08        | -1.16      | 1.10         | 1.20       | 1.17         |
| 1560071_a_at | ---        | ---                  | 0                                    | ---     | 1.05          | 1.00            | -1.07     | -1.24       | -1.08     | 1.21        | -1.44      | -1.30        | -2.37      | -2.99        | -1.38      | -1.77        |
| 1560148_at   | ---        | ---                  | 0                                    | ---     | 2.30          | 2.61            | 1.86      | 1.41        | -1.07     | 1.04        | 1.01       | -1.07        | -1.63      | -1.48        | -1.40      | -1.84        |
| 1560171_at   | ---        | ---                  | 0                                    | ---     | 3.15          | 3.80            | -1.39     | -2.22       | 1.15      | 1.00        | -1.12      | -1.23        | 1.31       | -1.20        | 4.57       | 2.75         |
| 1560222_at   | ---        | ---                  | 0                                    | ---     | 1.19          | 1.15            | 1.05      | -1.06       | 1.11      | 1.44        | -1.01      | -1.29        | -1.92      | -1.44        | -1.07      | -1.14        |
| 1560237_at   | ---        | ---                  | 0                                    | ---     | 3.96          | 4.66            | -1.27     | 1.12        | 1.46      | -1.36       | -1.28      | -1.57        | 2.35       | 2.46         | 1.44       | 1.07         |
| 1560271_at   | ---        | ---                  | 0                                    | ---     | 1.93          | 1.33            | 1.24      | 1.20        | -1.01     | 1.33        | 1.11       | -1.03        | -1.90      | -1.41        | -3.47      | -2.26        |
| 1560290_at   | ---        | ---                  | 0                                    | ---     | 1.35          | 1.42            | 1.28      | 1.46        | 1.22      | 1.31        | 1.14       | 1.24         | 1.18       | 1.05         | 2.65       | 2.57         |
| 1560347_at   | ---        | ---                  | 0                                    | ---     | -2.10         | 1.02            | -1.29     | -1.53       | -1.33     | 1.00        | 2.17       | 1.41         | 2.44       | 1.40         | 1.13       | 1.06         |
| 1560349_at   | ---        | ---                  | 0                                    | ---     | 1.34          | 1.27            | 1.03      | -1.10       | 1.47      | -1.04       | -1.05      | -1.74        | 1.40       | 1.07         | -3.76      | -2.15        |
| 1560480_at   | ---        | ---                  | 0                                    | ---     | 1.92          | 3.45            | 1.62      | -1.08       | 3.13      | 2.33        | -1.04      | -4.32        | -1.45      | 1.33         | 1.43       | -2.97        |
| 1560500_at   | ---        | ---                  | 0                                    | ---     | 1.93          | 1.83            | 1.14      | -1.24       | 1.22      | 1.32        | -1.14      | -1.24        | -2.12      | -2.28        | -2.26      | -2.82        |
| 1560506_at   | ---        | ---                  | 0                                    | ---     | 1.83          | 1.84            | 1.11      | -1.10       | -1.34     | -1.19       | -1.95      | -1.53        | -1.35      | -1.44        | 1.16       | 1.47         |
| 1560659_at   | ---        | ---                  | 0                                    | ---     | 1.34          | 1.38            | -1.06     | -1.32       | 1.08      | 1.58        | -1.09      | 1.20         | -2.04      | -2.26        | -3.14      | -2.95        |
| 1560661_x_at | ---        | ---                  | 0                                    | ---     | 1.14          | 1.20            | 1.25      | 1.14        | 1.27      | 1.12        | -1.15      | -1.19        | -2.45      | -2.90        | -3.72      | -2.82        |
| 1560680_at   | ---        | ---                  | 0                                    | ---     | -1.21         | 2.01            | -1.07     | -1.08       | -1.16     | -1.10       | -1.06      | -1.13        | -1.91      | -2.25        | -4.59      | -3.12        |
| 1560738_at   | ---        | ---                  | 0                                    | ---     | 1.05          | 1.58            | -1.03     | -1.33       | 1.08      | 1.19        | 1.00       | -1.60        | 5.98       | 6.42         | 4.35       | 4.60         |
| 1560739_a_at | ---        | ---                  | 0                                    | ---     | 1.18          | -1.21           | 1.05      | 1.21        | -1.37     | 1.09        | 1.68       | 1.11         | 5.27       | 5.45         | 5.26       | 5.75         |
| 1560745_at   | ---        | ---                  | 0                                    | ---     | -2.63         | -1.31           | -1.37     | -3.75       | -1.14     | 1.24        | 5.70       | 4.10         | 1.01       | -1.27        | 2.04       | 3.25         |
| 1560748_at   | ---        | ---                  | 0                                    | ---     | 2.55          | 2.35            | -1.42     | 2.31        | -2.15     | -1.58       | -1.13      | -2.79        | 2.29       | 1.33         | 1.03       | 1.19         |
| 1560846_at   | ---        | ---                  | 0                                    | ---     | -1.08         | -1.27           | 1.37      | 1.07        | 1.16      | -1.72       | 1.49       | 1.48         | -1.35      | 1.04         | -1.08      | 1.68         |
| 1560898_at   | ---        | ---                  | 0                                    | ---     | -1.93         | -2.26           | -1.60     | -1.22       | 2.71      | 1.12        | 1.25       | -3.32        | 4.98       | 4.45         | 1.33       | 2.43         |
| 1560926_at   | ---        | ---                  | 0                                    | ---     | 1.76          | 1.63            | -1.02     | -1.40       | 1.04      | 1.17        | -1.25      | 1.02         | -3.01      | -3.34        | -1.56      | -1.47        |
| 1560968_at   | ---        | ---                  | 0                                    | ---     | 2.36          | 1.31            | -1.09     | 1.86        | -1.29     | -1.20       | 1.22       | -3.05        | 3.79       | 3.21         | 2.81       | 1.04         |
| 1560986_a_at | ---        | ---                  | 0                                    | ---     | 1.62          | 1.85            | 1.30      | 1.02        | -1.30     | -1.43       | -1.37      | 1.17         | -2.95      | -3.02        | -1.33      | -1.21        |
| 1560987_a_at | ---        | ---                  | 0                                    | ---     | 1.42          | 1.05            | -1.02     | 1.08        | -1.26     | 1.05        | -1.23      | 1.05         | -5.53      | -11.53       | -4.21      | -2.83        |
| 1561025_at   | ---        | ---                  | 0                                    | ---     | 1.22          | 1.22            | 2.48      | 2.53        | -4.60     | -3.61       | -1.53      | 2.71         | 5.60       | 1.69         | 8.04       | 5.02         |
| 1561026_a_at | ---        | ---                  | 0                                    | ---     | -1.08         | -1.59           | -2.28     | 1.07        | -1.03     | 1.32        | 1.29       | 1.58         | 1.32       | 1.39         | 1.75       | 2.08         |
| 1561100_at   | ---        | ---                  | 0                                    | ---     | -1.00         | -1.25           | 1.04      | -1.52       | 1.55      | -1.00       | 1.40       | -1.00        | -1.12      | -1.20        | -1.01      | -1.33        |
| 1561121_at   | ---        | ---                  | 0                                    | ---     | -1.32         | -2.31           | 1.12      | -3.02       | -1.46     | -1.59       | 1.73       | 1.23         | -2.57      | -1.59        | -1.36      | 2.29         |
| 1561135_at   | ---        | ---                  | 0                                    | ---     | 1.72          | 1.75            | -1.02     | 1.20        | 1.35      | 1.37        | -1.07      | -1.07        | -3.13      | -2.78        | -2.66      | -2.45        |
| 1561180_at   | ---        | ---                  | 0                                    | ---     | 1.09          | -1.07           | -1.04     | -1.36       | 1.18      | 1.27        | -1.36      | -1.28        | -2.18      | -1.69        | -1.93      | -2.36        |
| 1561181_at   | ---        | ---                  | 0                                    | ---     | 1.03          | -1.22           | -1.04     | -1.25       | 2.26      | 1.58        | -1.01      | 1.25         | -3.91      | -2.76        | -3.45      | -2.55        |
| 1561216_at   | ---        | ---                  | 0                                    | ---     | -1.71         | -1.07           | -3.24     | 3.52        | -1.97     | 2.03        | 1.48       | -1.10        | 14.39      | 2.89         | -1.62      | -2.14        |
| 1561258_at   | ---        | ---                  | 0                                    | ---     | 1.27          | 3.65            | -1.43     | -2.60       | 1.10      | -1.03       | -1.69      | -2.89        | 7.93       | 4.41         | 1.91       | -1.22        |
| 1561293_at   | ---        | ---                  | 0                                    | ---     | 5.56          | 3.21            | -2.82     | -5.36       | 3.99      | 5.72        | -1.27      | -1.90        | 5.46       | 1.39         | 4.00       | 2.14         |
| 1561422_at   | ---        | ---                  | 0                                    | ---     | 1.12          | 1.21            | -1.17     | 1.11        | 1.58      | -1.27       | 1.11       | -1.69        | 1.99       | 1.78         | -1.43      | -4.13        |
| 1561453_at   | ---        | ---                  | 0                                    | ---     | -1.40         | -1.33           | -2.24     | -1.03       | -3.30     | -1.11       | -1.22      | -1.04        | 2.44       | 1.84         | 2.15       | 2.35         |
| 1561564_at   | ---        | ---                  | 0                                    | ---     | -1.07         | -2.59           | 1.06      | 1.09        | -1.27     | 1.01        | 1.97       | 1.87         | 1.31       | -1.36        | 3.66       | 4.23         |
| 1561639_at   | ---        | ---                  | 0                                    | ---     | 2.09          | 1.68            | -1.66     | -1.96       | 1.64      | 4.62        | -1.95      | -1.13        | -1.29      | 1.08         | -1.24      | 1.68         |
| 1561640_at   | ---        | ---                  | 0                                    | ---     | -1.00         | 1.12            | 1.23      | -1.27       | 1.31      | 1.31        | -1.01      | 1.03         | -1.79      | -1.65        | -1.38      | -1.51        |
| 1561669_at   | ---        | ---                  | 0                                    | ---     | 1.29          | 1.03            | 1.02      | -1.04       | 1.25      | -1.13       | -1.14      | -1.02        | -1.53      | -1.44        | -3.27      | -1.29        |
| 1561686_at   | ---        | ---                  | 0                                    | ---     | 2.16          | 1.53            | 1.09      | 1.14        | 1.19      | 1.34        | 1.70       | 1.21         | -1.73      | -2.11        | -1.11      | -2.35        |
| 1561703_at   | ---        | ---                  | 0                                    | ---     | -2.56         | -3.35           | 1.10      | -3.63       | -6.73     | -1.19       | 1.16       | 1.21         | 3.89       | -1.27        | 4.48       | 1.49         |
| 1561738_at   | ---        | ---                  | 0                                    | ---     | -2.26         | -2.16           | 1.04      | -1.01       | 1.02      | -2.99       | 4.22       | 4.22         | 1.04       | -3.91        | 3.59       | 4.70         |
| 1561749_at   | ---        | ---                  | 0                                    | ---     | 1.26          | 1.09            | 1.54      | 1.62        | 1.34      | 1.31        | 1.58       | 1.11         | 1.16       | 1.32         | 1.14       | 1.85         |
| 1561754_at   | ---        | ---                  | 0                                    | ---     | 2.27          | 1.36            | 1.01      | 1.48        | 1.27      | 1.26        | -1.17      | 1.43         | -2.45      | -4.69        | -1.73      | -1.59        |
| 1561756_at   | ---        | ---                  | 0                                    | ---     | 6.24          | 2.56            | -1.26     | -3.33       | -1.08     | 1.07        | 1.41       | 1.73         | 1.64       | -1.27        | -3.47      | 1.23         |
| 1561762_s_at | ---        | ---                  | 0                                    | ---     | -1.08         | -1.11           | 1.25      | 1.02        | 1.09      | 1.06        | 1.21       | -1.27        | -4.46      | -2.43        | -2.33      | -2.71        |
| 1561777_at   | ---        | ---                  | 0                                    | ---     | 1.66          | 1.10            | 1.05      | 1.05        | -1.03     | 1.20        | -1.27      | -1.01        | -1.88      | -1.62        | -3.36      | -2.65        |
| 1561780_at   | ---        | ---                  | 0                                    | ---     | 1.97          | -1.13           | 1.14      | -1.20       | -1.01     | -1.14       | -1.48      | -1.22        | -2.31      | -1.82        | -2.70      | -3.02        |
| 1561834_a_at | ---        | ---                  | 0                                    | ---     | -1.13         | 1.05            | -1.16     | -1.00       | 1.32      | -1.04       | 1.17       | 1.85         | 4.22       | 2.10         | 2.38       | 2.21         |
| 1561855_x_at | ---        | ---                  | 0                                    | ---     | -1.15         | -3.37           | -14.96    | -6.82       | 1.99      | 2.32        | 2.37       | 3.40         | -1.30      | -1.48        | 3.56       | 1.88         |
| 1561879_at   | ---        | ---                  | 0                                    | ---     | -1.32         | -1.27           | 1.14      | -1.14       | -1.69     | 1.30        | -1.07      | 1.16         | 1.41       | 1.38         | 1.17       | 1.96         |
| 1561893_at   | ---        | ---                  | 0                                    | ---     | 1.43          | 1.17            | 1.05      | -1.19       | 1.08      | 1.12        | -1.19      | -1.13        | 1.35       | 1.52         | 1.42       | 1.44         |
| 1561989_at   | ---        | ---                  | 0                                    | ---     | 3.80          | 3.20            | -1.16     | -5.05       | 1.28      | -3.22       | -1.94      | -1.61        | 1.66       | 1.42         | -2.04      | -1.94        |

| ID           | Gene Title | Chromosomal Location | 1st Gene Ontology Biological Process | Pathway | A2497 30 mins | A2497P' 30 mins | A2497 2 h | A2497P' 2 h | A2497 4 h | A2497P' 4 h | A2497 24 h | A2497P' 24 h | A2497 48 h | A2497P' 48 h | A2497 72 h | A2497P' 72 h |
|--------------|------------|----------------------|--------------------------------------|---------|---------------|-----------------|-----------|-------------|-----------|-------------|------------|--------------|------------|--------------|------------|--------------|
| 1562007_at   | ---        | ---                  | 0                                    | ---     | -1.03         | 1.19            | 1.07      | -1.19       | 1.16      | 1.10        | -1.00      | -1.05        | 1.91       | 1.52         | 1.09       | 1.07         |
| 1562059_at   | ---        | ---                  | 0                                    | ---     | -1.01         | 1.39            | 1.01      | -1.26       | -1.01     | 1.20        | 1.30       | 1.16         | -4.58      | -2.61        | -2.43      | -2.32        |
| 1562062_at   | ---        | ---                  | 0                                    | ---     | 1.17          | 1.01            | -1.00     | 1.01        | 1.17      | 1.26        | -1.12      | -1.12        | -1.15      | -1.12        | -2.22      | -1.76        |
| 1562063_x_at | ---        | ---                  | 0                                    | ---     | -1.09         | -1.09           | -1.19     | -1.04       | -1.27     | -1.08       | 1.51       | 1.06         | -1.95      | -1.44        | -2.38      | -1.81        |
| 1562091_at   | ---        | ---                  | 0                                    | ---     | -1.17         | -1.31           | -1.18     | 1.83        | 1.12      | -1.05       | -1.02      | -1.24        | -1.00      | 1.00         | 1.30       | -1.17        |
| 1562102_at   | ---        | ---                  | 0                                    | ---     | 1.26          | 1.22            | -1.04     | -1.07       | 1.07      | 1.48        | -1.10      | -1.20        | -2.24      | -1.73        | -1.69      | -2.88        |
| 1562216_at   | ---        | ---                  | 0                                    | ---     | 1.46          | 1.12            | 1.32      | 1.25        | -1.11     | -1.03       | -1.77      | -1.26        | 1.01       | -1.14        | 1.42       | 2.01         |
| 1562235_s_at | ---        | ---                  | 0                                    | ---     | 1.60          | 1.21            | 1.38      | -1.09       | 1.10      | 1.15        | -1.22      | -1.21        | -4.21      | -5.24        | -3.28      | -4.01        |
| 1562254_at   | ---        | ---                  | 0                                    | ---     | 1.11          | 1.08            | -1.21     | -1.20       | -1.21     | -1.08       | 2.29       | 1.55         | 1.57       | 1.12         | 3.16       | 2.08         |
| 1562280_at   | ---        | ---                  | 0                                    | ---     | 1.09          | 1.08            | 1.13      | 1.88        | 1.54      | 2.19        | 1.42       | -1.04        | -1.60      | -2.39        | 1.04       | -1.25        |
| 1562289_at   | ---        | ---                  | 0                                    | ---     | 1.20          | 1.04            | -1.02     | -1.31       | 1.79      | 1.53        | -1.20      | 1.08         | -1.70      | -1.29        | -1.69      | -1.45        |
| 1562290_at   | ---        | ---                  | 0                                    | ---     | -1.86         | 1.07            | 7.56      | 3.30        | 1.11      | 4.29        | 2.53       | -1.64        | 1.46       | 2.84         | 1.98       | -2.63        |
| 1562297_at   | ---        | ---                  | 0                                    | ---     | 1.71          | 1.87            | 1.55      | 1.33        | -4.50     | 1.37        | -1.03      | -1.08        | 2.53       | 1.62         | -2.09      | -1.21        |
| 1562307_at   | ---        | ---                  | 0                                    | ---     | 1.15          | -1.08           | 1.15      | 1.38        | 1.35      | 1.40        | -1.03      | -1.68        | -1.79      | -2.45        | 1.52       | -1.11        |
| 1562454_at   | ---        | ---                  | 0                                    | ---     | -1.10         | -1.16           | -1.23     | -1.16       | -1.10     | 1.43        | -1.25      | -1.25        | -1.22      | -1.61        | -1.50      | -1.81        |
| 1562464_at   | ---        | ---                  | 0                                    | ---     | -1.53         | -3.34           | -1.99     | -1.38       | -1.45     | 1.28        | -6.13      | 1.11         | 1.26       | -1.64        | 4.19       | 2.65         |
| 1562544_at   | ---        | ---                  | 0                                    | ---     | 1.34          | -1.26           | 1.13      | -1.14       | 1.52      | 2.12        | -1.08      | -1.48        | -3.44      | -2.93        | -3.22      | -2.60        |
| 1562576_at   | ---        | ---                  | 0                                    | ---     | -1.22         | -1.54           | -1.67     | 1.23        | 1.55      | 1.07        | -3.79      | -1.49        | 1.57       | -1.28        | 1.75       | 1.29         |
| 1562579_at   | ---        | ---                  | 0                                    | ---     | 1.74          | 2.00            | -1.72     | 1.44        | -1.12     | -1.23       | -1.97      | -1.01        | 2.65       | 2.45         | 1.47       | 2.74         |
| 1562612_at   | ---        | ---                  | 0                                    | ---     | -1.23         | -1.21           | 1.87      | 1.82        | 1.03      | 1.22        | -1.01      | 1.29         | -1.23      | -1.12        | -3.34      | -1.85        |
| 1562677_at   | ---        | ---                  | 0                                    | ---     | -2.34         | -1.13           | 1.32      | -1.25       | 2.26      | 1.74        | -1.63      | 1.06         | 1.68       | 1.78         | 1.17       | 1.29         |
| 1562793_at   | ---        | ---                  | 0                                    | ---     | 12.34         | 11.24           | 1.79      | -2.85       | -3.78     | -2.06       | 2.70       | 6.83         | 1.55       | -1.33        | -1.05      | 2.57         |
| 1562794_at   | ---        | ---                  | 0                                    | ---     | -1.05         | -1.06           | -1.01     | -1.17       | 1.20      | 1.87        | -1.48      | -1.21        | -1.54      | -1.49        | -1.57      | -1.29        |
| 1562797_at   | ---        | ---                  | 0                                    | ---     | 3.92          | 3.73            | -2.31     | -4.46       | 2.48      | 1.94        | 2.10       | 2.11         | -1.37      | 1.73         | 1.81       | 1.15         |
| 1562817_at   | ---        | ---                  | 0                                    | ---     | -1.22         | -1.20           | -1.13     | -1.46       | -2.76     | -1.64       | -1.68      | 1.18         | 3.29       | 1.89         | 2.51       | 1.14         |
| 1562834_at   | ---        | ---                  | 0                                    | ---     | -1.28         | -2.26           | 1.35      | -3.60       | -1.05     | -1.33       | 3.61       | 1.30         | 4.26       | 1.89         | 7.98       | -1.12        |
| 1562864_at   | ---        | ---                  | 0                                    | ---     | -1.94         | 1.16            | 1.12      | -1.52       | 1.47      | 1.20        | 2.07       | 1.17         | 1.65       | -1.72        | 1.51       | 1.06         |
| 1562899_at   | ---        | ---                  | 0                                    | ---     | 1.15          | 1.08            | -1.87     | 1.59        | -1.30     | 1.10        | 1.39       | 1.17         | 1.47       | -1.04        | -2.12      | -1.20        |
| 1562921_at   | ---        | ---                  | 0                                    | ---     | -1.09         | 1.06            | 1.10      | -1.12       | -1.36     | -1.15       | -1.37      | 1.03         | -1.93      | -1.33        | -3.09      | -2.67        |
| 1562940_at   | ---        | ---                  | 0                                    | ---     | 1.48          | -1.07           | 1.13      | -1.21       | -1.14     | 1.53        | 1.16       | 1.27         | -1.84      | -1.15        | -1.88      | -1.25        |
| 1562948_at   | ---        | ---                  | 0                                    | ---     | 1.69          | 1.21            | 1.21      | 1.29        | -1.09     | 1.39        | -1.06      | 1.07         | -1.22      | -1.14        | -1.43      | -1.63        |
| 1562957_at   | ---        | ---                  | 0                                    | ---     | 1.08          | -1.09           | -1.16     | 1.23        | 1.31      | 1.33        | -1.10      | -1.18        | -2.18      | -2.33        | -1.86      | -2.30        |
| 1562976_at   | ---        | ---                  | 0                                    | ---     | 1.59          | 1.81            | -2.00     | -1.69       | -1.93     | -1.05       | 1.37       | 1.40         | -1.17      | -1.33        | -1.76      | -1.74        |
| 1562999_x_at | ---        | ---                  | 0                                    | ---     | -2.42         | -3.04           | -1.37     | -1.67       | 1.05      | -1.97       | -9.42      | -1.66        | 2.88       | 3.19         | 8.77       | 7.86         |
| 1563032_at   | ---        | ---                  | 0                                    | ---     | 2.23          | 1.32            | 10.39     | 1.38        | -1.10     | -2.81       | 2.99       | 8.08         | 3.14       | 5.19         | 1.66       | 2.07         |
| 1563147_at   | ---        | ---                  | 0                                    | ---     | 2.37          | 1.53            | -1.33     | -1.30       | 1.14      | -1.11       | -1.22      | -1.21        | -4.11      | -5.82        | -4.09      | -2.00        |
| 1563259_at   | ---        | ---                  | 0                                    | ---     | -1.12         | -1.07           | 1.16      | 1.18        | 1.15      | 1.11        | -1.44      | 1.23         | -2.61      | -2.07        | -2.79      | -2.26        |
| 1563273_at   | ---        | ---                  | 0                                    | ---     | -1.22         | -1.40           | 1.37      | 1.00        | 1.84      | 1.44        | -2.24      | -1.08        | 1.14       | 1.50         | -1.00      | 1.19         |
| 1563295_at   | ---        | ---                  | 0                                    | ---     | -1.44         | 1.35            | 1.59      | -1.85       | 1.64      | -1.01       | 2.07       | 2.48         | 1.25       | 1.66         | 1.66       | 1.32         |
| 1563357_at   | ---        | ---                  | 0                                    | ---     | 1.02          | 1.15            | 1.06      | -1.28       | 1.04      | 1.56        | -1.01      | -1.01        | -1.04      | 1.13         | -1.04      | -1.31        |
| 1563392_at   | ---        | ---                  | 0                                    | ---     | -1.72         | -1.74           | -1.36     | -6.98       | -2.99     | -3.35       | 1.18       | -1.21        | 9.92       | 8.19         | 6.37       | 5.17         |
| 1563462_at   | ---        | ---                  | 0                                    | ---     | -6.96         | -3.72           | -2.19     | 5.07        | -5.69     | -1.07       | -1.11      | 1.01         | 7.33       | 2.19         | 3.46       | -1.07        |
| 1563472_at   | ---        | ---                  | 0                                    | ---     | 1.17          | -1.12           | -1.03     | 1.07        | 1.23      | 2.35        | -1.68      | -2.79        | 4.41       | 4.20         | 1.50       | 1.50         |
| 1563486_at   | ---        | ---                  | 0                                    | ---     | -20.16        | -21.21          | -4.60     | 1.50        | -1.49     | -1.55       | -6.47      | 1.15         | 1.30       | 1.36         | 1.28       | 2.00         |
| 1563531_at   | ---        | ---                  | 0                                    | ---     | 1.49          | -2.78           | 1.09      | 1.73        | -1.58     | 2.10        | -1.07      | 1.07         | -2.55      | -1.33        | -2.56      | -3.58        |
| 1563596_at   | ---        | ---                  | 0                                    | ---     | -1.04         | 2.34            | 1.56      | 1.73        | -1.73     | 1.79        | 1.56       | -5.93        | 8.08       | 10.01        | -6.42      | -2.94        |
| 1563601_at   | ---        | ---                  | 0                                    | ---     | 3.07          | 3.11            | 1.99      | 2.57        | 1.14      | 1.73        | 1.73       | 1.13         | -10.27     | -3.83        | -5.87      | -2.67        |
| 1563649_at   | ---        | ---                  | 0                                    | ---     | -1.04         | -1.25           | 1.18      | 1.12        | 1.39      | 1.19        | -1.04      | 1.27         | -2.82      | -2.47        | -2.24      | -1.64        |
| 1563693_at   | ---        | ---                  | 0                                    | ---     | 1.41          | -1.05           | -2.34     | -3.24       | -1.14     | -1.08       | 1.32       | 1.15         | 3.24       | 2.57         | -1.19      | -2.12        |
| 1563750_at   | ---        | ---                  | 0                                    | ---     | 1.59          | 1.78            | -1.29     | -2.00       | 1.10      | 1.83        | 1.35       | 1.12         | 5.40       | 3.29         | -5.01      | -1.64        |
| 1563858_at   | ---        | ---                  | 0                                    | ---     | -1.41         | 1.83            | 1.92      | 3.07        | 2.26      | 1.98        | 2.37       | -2.22        | 2.11       | 1.91         | 3.20       | 2.22         |
| 1563941_at   | ---        | ---                  | 0                                    | ---     | 1.89          | 1.46            | 1.15      | 1.48        | -2.43     | -1.38       | -2.21      | -1.31        | 1.27       | 1.06         | -1.95      | -1.20        |
| 1563950_at   | ---        | ---                  | 0                                    | ---     | 3.58          | 7.28            | -2.65     | 2.57        | 1.39      | -1.62       | 1.89       | -1.65        | 1.01       | 1.72         | 7.04       | 20.02        |
| 1564148_at   | ---        | ---                  | 0                                    | ---     | 3.02          | 2.35            | 1.26      | 1.47        | -1.29     | -1.20       | 3.88       | 11.62        | -1.95      | 1.26         | -1.28      | -1.13        |
| 1564192_at   | ---        | ---                  | 0                                    | ---     | 8.26          | 8.22            | -1.89     | -1.80       | -1.02     | -1.39       | -1.37      | -1.24        | -1.36      | -4.12        | 2.30       | 2.66         |
| 1564236_at   | ---        | ---                  | 0                                    | ---     | 2.64          | 1.89            | -1.45     | -2.27       | 1.19      | 2.24        | 2.73       | -2.82        | -2.82      | -4.10        | 1.66       | 8.37         |
| 1564250_at   | ---        | ---                  | 0                                    | ---     | 2.76          | 1.92            | 1.60      | 2.99        | -2.31     | 2.49        | -3.51      | -5.63        | 1.07       | -1.97        | 1.25       | 2.63         |
| 1564369_at   | ---        | ---                  | 0                                    | ---     | 1.07          | -1.02           | 1.40      | -1.04       | -1.54     | -2.94       | -1.52      | -1.66        | 2.04       | 1.83         | -1.43      | -1.94        |
| 1564479_a_at | ---        | ---                  | 0                                    | ---     | -1.99         | -1.74           | 1.59      | 1.73        | -1.01     | 2.24        | 4.01       | 5.94         | 2.54       | 1.09         | -1.01      | 2.26         |
| 1564561_at   | ---        | ---                  | 0                                    | ---     | -1.78         | -1.41           | -2.52     | -1.50       | 1.13      | -1.80       | 1.16       | 1.88         | 2.23       | 3.05         | -2.88      | -1.64        |
| 1564654_at   | ---        | ---                  | 0                                    | ---     | 1.05          | 1.11            | -1.06     | -1.12       | -1.43     | -1.50       | 1.62       | 1.61         | 1.78       | 1.81         | 1.10       | 1.29         |
| 1564718_at   | ---        | ---                  | 0                                    | ---     | -3.30         | 1.46            | 2.36      | -5.05       | 1.58      | 1.19        | 2.88       | 2.31         | -2.68      | -1.17        | 4.77       | 4.02         |
| 1564767_at   | ---        | ---                  | 0                                    | ---     | -1.44         | 1.17            | 5.18      | 3.50        | -2.83     | -2.03       | -1.72      | -1.54        | 4.89       | 2.06         | -2.23      | 1.20         |
| 1564795_at   | ---        | ---                  | 0                                    | ---     | -1.59         | -1.95           | -2.03     | 1.88        | 1.37      | 1.33        | -2.29      | -2.00        | 1.04       | 1.11         | -4.49      | -3.50        |
| 1564840_at   | ---        | ---                  | 0                                    | ---     | 1.41          | 1.07            | 1.04      | 1.21        | -1.03     | 1.81        | -1.30      | -1.39        | -3.49      | -6.20        | -2.06      | -1.41        |
| 1564851_at   | ---        | ---                  | 0                                    | ---     | 2.71          | 1.13            | -1.11     | 1.98        | -2.14     | -1.49       | 3.11       | 1.15         | 2.11       | 2.45         | -1.55      | 3.60         |

| ID           | Gene Title | Chromosomal Location | 1st Gene Ontology Biological Process | Pathway                                   | A2497 30 mins | A2497P' 30 mins | A2497 2 h | A2497P' 2 h | A2497 4 h | A2497P' 4 h | A2497 24 h | A2497P' 24 h | A2497 48 h | A2497P' 48 h | A2497 72 h | A2497P' 72 h |
|--------------|------------|----------------------|--------------------------------------|-------------------------------------------|---------------|-----------------|-----------|-------------|-----------|-------------|------------|--------------|------------|--------------|------------|--------------|
| 1564886_at   | ---        | ---                  | 0                                    | ---                                       | 1.24          | 1.01            | 1.17      | 1.08        | 1.22      | 1.14        | 1.08       | -1.43        | -2.81      | -2.87        | -1.09      | -1.37        |
| 1564965_at   | ---        | ---                  | 0                                    | ---                                       | 4.41          | 1.62            | 1.82      | -1.18       | -2.59     | -3.44       | -3.98      | 1.42         | 6.29       | 2.95         | 2.85       | 8.03         |
| 1564996_at   | ---        | ---                  | 0                                    | ---                                       | 1.83          | -1.97           | -1.54     | -1.13       | 1.36      | -1.93       | 2.02       | 1.62         | 2.36       | -1.08        | -3.44      | -2.70        |
| 1565002_at   | ---        | ---                  | 0                                    | ---                                       | 1.20          | 2.12            | -1.36     | 1.54        | -1.26     | -1.23       | 1.40       | 3.44         | 1.20       | -1.99        | -1.11      | -1.72        |
| 1565567_at   | ---        | ---                  | 0                                    | ---                                       | -1.35         | -1.13           | 1.04      | -1.51       | 1.02      | 1.10        | 1.12       | -1.02        | -1.36      | -1.51        | -1.49      | 1.08         |
| 1565577_s_at | ---        | ---                  | 0                                    | ---                                       | -1.03         | -1.03           | 1.12      | -1.10       | 1.11      | -1.19       | -1.37      | -1.25        | -1.71      | -1.34        | -2.03      | -1.47        |
| 1565614_at   | ---        | ---                  | 0                                    | ---                                       | 1.80          | 1.68            | -1.05     | 1.50        | -1.02     | 1.11        | 1.58       | 1.00         | -4.94      | -1.73        | -2.89      | -2.12        |
| 1565627_a_at | ---        | ---                  | 0                                    | ---                                       | 1.01          | 1.02            | -1.06     | -1.09       | 1.04      | 1.05        | -1.16      | -1.17        | -1.59      | -1.42        | -1.52      | -1.69        |
| 1565628_at   | ---        | ---                  | 0                                    | ---                                       | -1.11         | -1.03           | 1.02      | -1.10       | 1.08      | 1.00        | -1.02      | -1.04        | -1.74      | -1.64        | -1.73      | -1.86        |
| 1565644_at   | ---        | ---                  | 0                                    | ---                                       | -1.22         | -1.08           | 1.23      | 1.34        | -2.27     | -1.03       | 1.19       | -1.16        | 1.44       | 2.09         | 2.83       | 2.76         |
| 1565651_at   | ---        | ---                  | 0                                    | ---                                       | 1.08          | 1.21            | 1.02      | -1.09       | 1.23      | 1.26        | -1.09      | 1.12         | -1.28      | 1.24         | 1.31       | 1.93         |
| 1565656_x_at | ---        | ---                  | 0                                    | ---                                       | -1.03         | 2.23            | -1.12     | -1.22       | 1.53      | -1.28       | 2.24       | -1.11        | -1.90      | 1.08         | -1.02      | 2.28         |
| 1565672_at   | ---        | ---                  | 0                                    | ---                                       | 1.47          | -1.12           | -1.46     | 1.39        | 1.20      | -1.34       | -1.10      | -1.53        | -1.26      | -1.30        | 1.12       | -4.16        |
| 1565689_at   | ---        | ---                  | 0                                    | ---                                       | 1.96          | 1.50            | 1.34      | 1.40        | 1.16      | 1.21        | -1.69      | -1.77        | -2.35      | -2.83        | -2.32      | -1.96        |
| 1565713_at   | ---        | ---                  | 0                                    | ---                                       | -1.05         | -3.12           | 1.33      | -1.41       | 1.03      | 2.70        | 5.42       | 4.07         | 1.28       | 1.21         | -2.78      | -3.15        |
| 1565730_at   | ---        | ---                  | 0                                    | ---                                       | -1.44         | -1.70           | -1.23     | 1.41        | 1.17      | 1.06        | 1.29       | -1.19        | -2.51      | -1.56        | -1.52      | -1.57        |
| 1565735_at   | ---        | ---                  | 0                                    | ---                                       | -1.25         | -1.13           | 2.70      | 5.45        | 1.11      | -1.00       | -1.47      | 1.27         | 1.93       | 2.12         | -9.75      | 1.22         |
| 1565769_at   | ---        | ---                  | 0                                    | ---                                       | -3.89         | -8.45           | -1.68     | -2.98       | -3.75     | -3.96       | 1.29       | 1.02         | 3.89       | 4.49         | 3.51       | 2.92         |
| 1565832_at   | ---        | ---                  | 0                                    | ---                                       | 1.04          | 1.09            | -1.91     | -1.35       | 2.02      | 2.02        | 1.23       | 1.19         | 1.65       | 2.09         | 1.25       | -1.29        |
| 1565887_at   | ---        | ---                  | 0                                    | ---                                       | -1.33         | -1.23           | 1.21      | -1.00       | 1.20      | 1.38        | 1.43       | -1.21        | -2.05      | -2.00        | -1.71      | -1.89        |
| 1565889_at   | ---        | ---                  | 0                                    | ---                                       | 1.36          | 1.60            | 1.14      | 1.01        | -1.17     | -1.15       | 1.67       | 1.23         | -1.31      | -1.49        | -2.53      | -2.47        |
| 1565894_at   | ---        | ---                  | 0                                    | ---                                       | 1.26          | 1.04            | -1.21     | 1.07        | -1.36     | -2.22       | -1.07      | 1.55         | -1.42      | 1.01         | 2.28       | 1.48         |
| 1565927_s_at | ---        | ---                  | 0                                    | ---                                       | 1.16          | 1.24            | -1.62     | -1.06       | -1.00     | 1.03        | 1.16       | -1.85        | -1.23      | -1.33        | -2.17      | -1.31        |
| 1566113_at   | ---        | ---                  | 0                                    | ---                                       | 1.41          | -1.55           | -1.18     | -1.13       | 1.23      | 1.10        | -1.18      | -1.45        | -1.21      | -1.19        | -2.17      | -3.78        |
| 1566115_at   | ---        | ---                  | 0                                    | ---                                       | -1.36         | -1.47           | 1.60      | 1.36        | -1.87     | 1.41        | -1.39      | -1.28        | -1.18      | -1.29        | -1.90      | -6.42        |
| 1566144_at   | ---        | ---                  | 0                                    | ---                                       | 1.07          | -1.03           | -1.12     | 1.05        | -1.58     | -1.02       | -1.71      | -1.59        | -1.02      | -1.05        | -2.76      | -2.57        |
| 1566146_x_at | ---        | ---                  | 0                                    | ---                                       | 1.37          | 1.17            | -1.13     | 1.07        | 1.19      | 1.33        | -1.16      | -1.22        | -1.69      | -1.69        | -2.79      | -3.90        |
| 1566151_at   | ---        | ---                  | 0                                    | ---                                       | -2.26         | 1.66            | 1.07      | 1.28        | 2.39      | 2.10        | -1.47      | -1.35        | 2.44       | 4.17         | -2.57      | -1.83        |
| 1566228_at   | ---        | ---                  | 0                                    | ---                                       | 2.42          | 2.35            | -1.28     | 1.47        | 1.46      | -3.69       | -1.62      | -2.17        | -1.00      | 1.60         | 1.58       | 1.30         |
| 1566242_at   | ---        | ---                  | 0                                    | ---                                       | 1.35          | 1.28            | 1.09      | -1.15       | 1.51      | 1.28        | 1.01       | -1.17        | -2.08      | -2.46        | -2.69      | -2.12        |
| 1566243_at   | ---        | ---                  | 0                                    | ---                                       | 1.44          | 1.50            | -1.10     | -1.09       | 1.12      | 1.04        | -1.06      | -1.16        | -2.29      | -2.38        | -3.00      | -2.98        |
| 1566446_at   | ---        | ---                  | 0                                    | ---                                       | 1.33          | -1.05           | -1.54     | -1.85       | -1.28     | -1.34       | 1.23       | -1.15        | -1.76      | -1.60        | -1.87      | -2.08        |
| 1566468_at   | ---        | ---                  | 0                                    | ---                                       | 1.28          | -2.36           | 1.25      | -5.85       | -1.08     | -2.40       | -1.57      | 8.24         | -1.39      | 1.94         | 4.67       | 4.67         |
| 1566491_at   | ---        | ---                  | 0                                    | ---                                       | 1.42          | 1.61            | 1.23      | -1.02       | 1.39      | 1.27        | 1.62       | 1.22         | -6.51      | -3.71        | -3.27      | -4.17        |
| 1566501_at   | ---        | ---                  | 0                                    | ---                                       | 1.48          | 1.73            | -1.37     | 1.65        | -1.00     | 1.53        | 1.56       | 1.30         | 1.12       | -1.51        | -1.80      | 1.45         |
| 1566512_at   | ---        | ---                  | 0                                    | ---                                       | 1.11          | -1.16           | 1.11      | 1.28        | 1.48      | 1.04        | 1.39       | 1.49         | -1.11      | -1.03        | -1.84      | -1.51        |
| 1566535_at   | ---        | ---                  | 0                                    | ---                                       | -1.78         | 1.09            | -1.42     | -1.25       | -1.04     | -1.68       | -1.60      | -1.04        | -1.35      | 1.00         | -1.60      | -2.10        |
| 1566543_at   | ---        | ---                  | 0                                    | ---                                       | -1.09         | 1.14            | 1.18      | -1.40       | -1.43     | -1.64       | 5.47       | 5.12         | -1.25      | -1.36        | -3.59      | -1.47        |
| 1566581_at   | ---        | ---                  | 0                                    | ---                                       | 1.21          | 1.06            | -2.63     | -1.17       | -1.07     | 1.22        | 1.90       | 2.34         | 1.13       | 1.10         | -1.09      | 1.02         |
| 1566597_at   | ---        | ---                  | 0                                    | ---                                       | -1.53         | -1.25           | -1.26     | 2.66        | -1.20     | 1.32        | -1.76      | 1.58         | 2.91       | 2.13         | -1.10      | -1.11        |
| 1566633_at   | ---        | ---                  | 0                                    | ---                                       | 1.20          | 1.10            | 1.17      | 1.07        | 1.12      | 1.06        | -1.08      | -1.21        | -2.03      | -1.73        | 1.17       | 1.04         |
| 1566644_at   | ---        | ---                  | 0                                    | ---                                       | -6.33         | -4.29           | -2.19     | -1.36       | 1.04      | -2.25       | 2.65       | 1.76         | 4.01       | 2.82         | -1.69      | -2.47        |
| 1566672_at   | ---        | ---                  | 0                                    | ---                                       | -1.24         | -1.12           | -1.21     | -1.17       | -1.68     | -1.52       | -1.51      | -1.30        | 2.56       | 1.72         | -1.38      | 1.76         |
| 1566694_at   | ---        | ---                  | 0                                    | ---                                       | 3.90          | 1.07            | -2.53     | -1.52       | -1.36     | -1.52       | 2.69       | 2.29         | 10.23      | 4.61         | 1.18       | 3.75         |
| 1566715_at   | ---        | ---                  | 0                                    | ---                                       | 2.69          | 1.74            | 3.75      | 2.16        | -1.25     | 1.81        | -1.05      | -2.02        | 10.03      | 6.28         | -1.57      | -1.39        |
| 1566768_at   | ---        | ---                  | 0                                    | ---                                       | 1.86          | 1.24            | -2.74     | 1.66        | -1.17     | -1.04       | 1.30       | -1.20        | 5.02       | 1.28         | 3.57       | 5.43         |
| 1566867_at   | ---        | ---                  | 0                                    | ---                                       | 1.00          | 1.30            | 1.20      | -1.64       | -1.62     | -1.33       | 1.46       | -1.40        | 1.13       | 1.01         | -1.21      | -3.31        |
| 1566896_at   | ---        | ---                  | 0                                    | ---                                       | 2.10          | -1.14           | -1.40     | -1.64       | 1.08      | 1.15        | -1.03      | 2.46         | 1.73       | 1.60         | 1.32       | -2.40        |
| 1566898_at   | ---        | ---                  | tricarboxylic acid cycle             | Electron_Transport_Chain // GenMAPP /// K | 2.21          | -1.21           | -1.40     | -1.49       | 1.68      | 7.14        | -1.95      | 1.57         | 1.35       | 1.15         | 1.51       | 4.77         |
| 1566938_at   | ---        | ---                  | 0                                    | ---                                       | -1.02         | -1.59           | -3.12     | -1.26       | -1.09     | -1.26       | 1.33       | 1.15         | 8.31       | 4.83         | -4.45      | 1.06         |
| 1566949_at   | ---        | ---                  | 0                                    | ---                                       | -1.69         | -1.24           | -1.64     | 1.84        | 1.48      | 1.08        | -1.13      | -1.32        | -1.94      | -2.28        | 1.55       | 2.17         |
| 1567044_s_at | ---        | ---                  | 0                                    | ---                                       | -1.05         | -1.14           | 1.17      | 1.09        | -1.19     | -1.03       | -1.47      | -1.11        | -1.62      | -1.83        | -2.20      | -2.08        |
| 1567045_at   | ---        | ---                  | 0                                    | ---                                       | -1.56         | -1.26           | 1.28      | -1.05       | -1.13     | -1.26       | -2.14      | -1.58        | -2.04      | -1.61        | -2.13      | -1.96        |
| 1567105_at   | ---        | ---                  | 0                                    | ---                                       | -1.21         | -1.16           | -1.00     | -1.12       | 1.12      | 1.14        | 1.17       | 1.06         | 1.15       | 1.11         | 1.13       | 1.10         |
| 1567274_at   | ---        | ---                  | 0                                    | ---                                       | -1.43         | -1.58           | 1.21      | -1.04       | 1.53      | 1.46        | -1.48      | 1.13         | -1.43      | -1.14        | -1.46      | -1.81        |
| 1567280_at   | ---        | ---                  | 0                                    | ---                                       | -1.45         | -2.47           | -2.41     | -1.39       | 2.48      | 1.03        | -1.16      | 1.54         | -1.41      | 1.21         | 5.54       | 1.06         |
| 1567341_at   | ---        | ---                  | 0                                    | ---                                       | -1.94         | 1.37            | -1.35     | -1.21       | -1.19     | 2.06        | -1.37      | -1.14        | 4.07       | 4.15         | -1.57      | -2.27        |
| 1567387_at   | ---        | ---                  | 0                                    | ---                                       | -1.69         | 1.59            | 4.27      | 9.13        | -8.11     | -1.75       | -12.86     | -1.98        | 1.07       | -1.72        | 7.42       | 7.03         |
| 1567527_at   | ---        | ---                  | 0                                    | ---                                       | 1.07          | 1.12            | 1.04      | 1.04        | -1.00     | 1.05        | -1.24      | -1.22        | -2.32      | -2.55        | -2.53      | -3.47        |
| 1567590_at   | ---        | ---                  | 0                                    | ---                                       | 1.04          | -1.02           | 1.45      | 1.82        | -1.44     | -1.10       | -1.41      | 1.01         | 1.41       | 1.85         | -1.29      | 1.25         |
| 1567612_at   | ---        | ---                  | 0                                    | ---                                       | 1.28          | 1.29            | -1.36     | -1.33       | 1.50      | 1.24        | -1.37      | 1.02         | -1.06      | -2.30        | -1.20      | -2.74        |
| 1568191_at   | ---        | ---                  | 0                                    | ---                                       | -1.07         | -1.14           | -1.03     | -1.03       | 1.23      | 1.31        | -1.02      | -1.28        | -1.26      | -1.08        | -1.40      | -1.09        |
| 1568365_at   | ---        | ---                  | 0                                    | ---                                       | 1.17          | 1.03            | 1.10      | 1.49        | 1.05      | 1.30        | -1.59      | 1.32         | -1.44      | -1.97        | -1.21      | 1.28         |
| 1568611_at   | ---        | ---                  | 0                                    | ---                                       | 1.05          | 1.14            | 1.03      | -1.13       | 1.03      | 1.07        | -1.22      | -1.09        | 1.15       | 1.52         | 1.31       | 1.25         |
| 1568639_a_at | ---        | ---                  | 0                                    | ---                                       | 1.10          | 1.05            | 1.09      | 1.15        | 1.07      | 1.01        | 1.03       | 1.06         | -1.95      | -2.12        | -2.13      | -2.15        |
| 1568643_a_at | ---        | ---                  | 0                                    | ---                                       | 1.41          | -1.19           | -1.63     | 1.09        | 1.02      | 1.30        | -1.04      | -1.22        | 2.28       | 2.04         | -1.47      | -1.12        |

| ID           | Gene Title | Chromosomal Location | 1st Gene Ontology Biological Process | Pathway | A2497 30 mins | A2497P' 30 mins | A2497 2 h | A2497P' 2 h | A2497 4 h | A2497P' 4 h | A2497 24 h | A2497P' 24 h | A2497 48 h | A2497P' 48 h | A2497 72 h | A2497P' 72 h |
|--------------|------------|----------------------|--------------------------------------|---------|---------------|-----------------|-----------|-------------|-----------|-------------|------------|--------------|------------|--------------|------------|--------------|
| 1568742_at   | ---        | ---                  | 0                                    | ---     | 1.20          | 1.02            | 1.09      | 1.23        | 1.01      | 1.01        | -1.13      | -1.25        | -1.58      | -1.58        | -1.57      | -1.84        |
| 1568748_at   | ---        | ---                  | 0                                    | ---     | 1.31          | 1.06            | -1.04     | 1.00        | 1.30      | 1.25        | 1.01       | 1.09         | -1.52      | -1.12        | -2.02      | -1.57        |
| 1568755_a_at | ---        | ---                  | 0                                    | ---     | 1.76          | 1.39            | -1.44     | -1.10       | 1.07      | -1.02       | -1.19      | -2.16        | 2.48       | 1.39         | -1.43      | -1.15        |
| 1568781_at   | ---        | ---                  | 0                                    | ---     | 1.13          | 1.08            | 1.08      | 1.13        | -1.07     | 1.06        | -1.10      | -1.16        | -2.35      | -1.82        | -3.06      | -3.85        |
| 1568795_at   | ---        | ---                  | 0                                    | ---     | 1.73          | 1.85            | 1.98      | 2.32        | -2.09     | -1.56       | -1.68      | -1.07        | -3.45      | -1.91        | -1.52      | -2.03        |
| 1568799_at   | ---        | ---                  | 0                                    | ---     | 1.13          | -1.28           | 1.08      | -1.03       | 1.20      | 1.06        | -1.53      | -1.45        | -2.33      | -2.27        | -1.19      | -1.12        |
| 1568846_at   | ---        | ---                  | 0                                    | ---     | 1.19          | -1.56           | -2.07     | -1.46       | 1.42      | 1.47        | -2.52      | -1.11        | 1.07       | -1.41        | -2.11      | -2.72        |
| 1568847_at   | ---        | ---                  | 0                                    | ---     | 1.34          | 1.00            | 1.09      | 1.29        | -1.32     | -1.09       | 1.65       | 1.34         | -1.60      | -1.17        | -1.50      | -1.69        |
| 1568867_x_at | ---        | ---                  | 0                                    | ---     | 1.42          | -1.17           | -1.16     | -1.30       | 1.02      | 1.85        | 1.60       | 1.16         | -1.61      | -2.05        | -2.72      | -2.03        |
| 1569052_at   | ---        | ---                  | 0                                    | ---     | 1.06          | -1.32           | 1.04      | 1.11        | 1.24      | 1.10        | 1.26       | 1.15         | -1.26      | -1.49        | -1.83      | -1.63        |
| 1569154_a_at | ---        | ---                  | 0                                    | ---     | 1.04          | -1.25           | -1.11     | -1.31       | -1.28     | -1.06       | 1.08       | -1.02        | 1.80       | 1.63         | 1.46       | 1.90         |
| 1569167_at   | ---        | ---                  | 0                                    | ---     | -1.01         | -1.04           | -1.26     | -1.07       | -1.08     | 1.08        | -1.14      | -1.19        | -2.77      | -1.03        | -2.23      | -2.75        |
| 1569180_at   | ---        | ---                  | 0                                    | ---     | -1.08         | 1.06            | -1.06     | 1.42        | 1.23      | 1.17        | -1.03      | 1.03         | -2.64      | -1.73        | -2.79      | -2.80        |
| 1569181_x_at | ---        | ---                  | 0                                    | ---     | -1.21         | -1.05           | -1.01     | 1.09        | 1.13      | 1.32        | 1.02       | 1.11         | -2.08      | -1.91        | -2.62      | -2.24        |
| 1569200_at   | ---        | ---                  | 0                                    | ---     | 1.34          | -1.01           | -1.10     | -1.48       | 1.27      | 1.22        | -1.08      | -1.13        | -1.53      | -1.47        | -1.32      | -1.05        |
| 1569208_a_at | ---        | ---                  | 0                                    | ---     | 1.11          | 1.21            | -1.06     | -1.23       | -1.09     | -1.02       | 1.09       | -1.03        | -2.09      | -1.88        | -2.12      | -1.76        |
| 1569231_x_at | ---        | ---                  | 0                                    | ---     | 2.75          | -1.70           | 1.06      | 1.29        | 2.24      | -1.31       | 3.29       | 3.62         | -1.04      | -1.44        | 3.63       | 12.27        |
| 1569296_a_at | ---        | ---                  | 0                                    | ---     | 1.29          | 1.12            | -1.08     | -1.14       | 1.04      | -1.03       | 1.58       | 1.50         | -2.26      | -1.99        | -2.70      | -1.68        |
| 1569307_s_at | ---        | ---                  | 0                                    | ---     | -1.48         | 1.24            | 1.67      | 1.68        | -1.24     | 1.39        | -1.94      | -1.61        | -7.43      | -3.05        | -3.30      | -3.21        |
| 1569311_at   | ---        | ---                  | 0                                    | ---     | 1.30          | 1.20            | 1.82      | 1.36        | -1.03     | 1.01        | -1.27      | -1.09        | -2.20      | -1.72        | -3.42      | -3.20        |
| 1569321_at   | ---        | ---                  | 0                                    | ---     | -1.13         | 1.07            | 1.12      | -1.04       | 1.11      | 1.19        | 1.76       | 1.15         | 1.80       | 1.98         | 1.56       | 1.36         |
| 1569345_at   | ---        | ---                  | 0                                    | ---     | 1.30          | 1.13            | 1.16      | 1.06        | 1.64      | 1.22        | 1.17       | 1.03         | 1.98       | -1.31        | 1.05       | -1.51        |
| 1569399_at   | ---        | ---                  | 0                                    | ---     | -2.54         | -1.69           | 1.26      | 2.60        | 1.17      | -1.12       | -1.22      | 2.26         | -1.15      | -2.45        | 1.06       | -1.00        |
| 1569439_at   | ---        | ---                  | 0                                    | ---     | 1.22          | 1.06            | -1.07     | -1.17       | -1.11     | 1.24        | -1.93      | -1.33        | -4.61      | -7.19        | -4.34      | -5.15        |
| 1569487_at   | ---        | ---                  | 0                                    | ---     | 1.06          | 1.07            | 1.02      | -1.32       | -1.88     | -1.10       | 1.11       | 1.18         | -1.29      | -2.04        | -1.02      | 1.43         |
| 1569499_at   | ---        | ---                  | 0                                    | ---     | 1.30          | -2.13           | -1.01     | -1.30       | -1.34     | -1.14       | -1.37      | -1.38        | -1.96      | -1.40        | -1.74      | -1.51        |
| 1569501_at   | ---        | ---                  | 0                                    | ---     | -2.35         | 1.18            | -1.15     | -1.29       | 3.52      | 2.81        | -1.77      | 1.61         | -2.04      | 1.03         | -1.82      | -2.99        |
| 1569512_at   | ---        | ---                  | 0                                    | ---     | 1.29          | 1.18            | 1.04      | -1.19       | 1.17      | 1.10        | -1.44      | -1.46        | -3.19      | -2.06        | -2.09      | -2.04        |
| 1569523_a_at | ---        | ---                  | 0                                    | ---     | 2.18          | 3.95            | -1.26     | -3.37       | 3.26      | -1.22       | -2.30      | 1.18         | -1.90      | 1.08         | -2.90      | -1.33        |
| 1569538_at   | ---        | ---                  | 0                                    | ---     | 1.99          | 1.74            | 1.14      | 1.27        | -1.22     | 1.28        | 1.28       | -1.32        | -2.37      | -2.65        | -1.77      | -2.11        |
| 1569540_at   | ---        | ---                  | 0                                    | ---     | 1.23          | 1.32            | -1.31     | -1.15       | 1.23      | 1.29        | 1.04       | 1.10         | -1.32      | -1.86        | -2.49      | -1.53        |
| 1569608_x_at | ---        | ---                  | 0                                    | ---     | 1.17          | 1.22            | 1.24      | -1.17       | -1.16     | -1.30       | -1.24      | -1.22        | -2.55      | -2.71        | -2.17      | -1.94        |
| 1569664_at   | ---        | ---                  | 0                                    | ---     | 1.26          | 1.03            | 1.23      | -1.03       | 1.20      | 1.14        | -1.42      | -1.06        | -1.73      | -1.74        | -1.91      | -2.53        |
| 1569834_at   | ---        | ---                  | 0                                    | ---     | -1.12         | 1.13            | -1.62     | 1.08        | 1.21      | 1.05        | -1.07      | -1.31        | 3.55       | 6.74         | 2.86       | 1.78         |
| 1569917_at   | ---        | ---                  | 0                                    | ---     | 1.30          | 1.54            | -1.74     | 1.13        | 2.23      | 1.48        | 1.04       | 1.49         | -1.59      | -1.59        | 1.51       | -1.48        |
| 1569927_at   | ---        | ---                  | 0                                    | ---     | 1.98          | 2.13            | -1.02     | 1.02        | -1.27     | 1.03        | -4.45      | -1.02        | -4.24      | -1.30        | -3.48      | -1.89        |
| 1569988_at   | ---        | ---                  | 0                                    | ---     | 1.40          | 2.37            | 2.89      | 3.50        | 2.84      | 3.09        | 1.06       | -2.05        | -1.29      | -1.34        | 2.77       | 1.40         |
| 1569999_at   | ---        | ---                  | 0                                    | ---     | 1.21          | 1.22            | 1.02      | 1.04        | 1.72      | 1.60        | 1.03       | -1.13        | -1.90      | -1.70        | -1.47      | -1.32        |
| 1570050_at   | ---        | ---                  | 0                                    | ---     | 1.84          | 1.61            | -1.41     | -2.65       | -9.74     | -1.41       | -1.02      | -2.58        | -2.09      | 1.13         | -2.34      | -1.52        |
| 1570057_x_at | ---        | ---                  | GTP catabolic process                | ---     | -1.93         | -1.14           | -1.39     | 1.80        | -1.00     | -1.13       | 1.72       | 1.99         | 2.88       | 3.82         | -2.00      | -1.36        |
| 1570061_at   | ---        | ---                  | 0                                    | ---     | -1.53         | -1.51           | -1.11     | -1.22       | 1.04      | 1.02        | 1.89       | 1.62         | 2.49       | 1.72         | -1.15      | 1.30         |
| 1570084_at   | ---        | ---                  | 0                                    | ---     | -1.26         | 1.26            | 1.50      | 1.57        | 1.73      | -1.15       | 1.06       | 1.46         | -6.41      | -4.21        | 1.02       | 1.02         |
| 1570124_at   | ---        | ---                  | 0                                    | ---     | 1.99          | 2.52            | -1.91     | 1.52        | -4.26     | -1.61       | -1.12      | -1.11        | 1.74       | 2.58         | -1.05      | 1.70         |
| 1570146_at   | ---        | ---                  | 0                                    | ---     | 2.38          | 5.39            | -1.54     | 3.51        | -3.06     | -1.49       | -2.44      | -1.12        | 2.85       | -1.21        | -2.40      | -1.89        |
| 1570151_at   | ---        | ---                  | 0                                    | ---     | 1.17          | -1.01           | 1.19      | 1.19        | 1.02      | 1.15        | 1.04       | 1.06         | -2.41      | -2.12        | -3.02      | -3.22        |
| 1570158_at   | ---        | ---                  | 0                                    | ---     | -1.27         | 1.23            | -1.91     | 1.39        | 1.41      | 1.42        | 1.18       | 1.41         | 3.42       | 4.02         | 1.30       | 2.15         |
| 1570162_at   | ---        | ---                  | 0                                    | ---     | -1.95         | 1.53            | 2.25      | -1.83       | -4.17     | -2.24       | -1.20      | -2.83        | 4.46       | 3.44         | -1.47      | -1.16        |
| 1570177_at   | ---        | ---                  | 0                                    | ---     | 1.63          | 2.25            | 1.05      | 1.14        | 1.69      | 1.56        | -1.00      | -1.36        | -1.19      | -1.11        | -2.24      | -3.35        |
| 1570180_at   | ---        | ---                  | 0                                    | ---     | -1.31         | -1.13           | 1.11      | 1.59        | -2.32     | -1.49       | 1.49       | 2.58         | 2.86       | 2.40         | 12.76      | 5.15         |
| 1570181_a_at | ---        | ---                  | 0                                    | ---     | -1.01         | 3.31            | -1.21     | 1.21        | -3.16     | -1.54       | 2.50       | -1.63        | 4.56       | 4.13         | 14.65      | 17.11        |
| 1570191_at   | ---        | ---                  | 0                                    | ---     | -1.31         | -1.14           | 1.80      | -1.06       | 1.44      | 1.12        | 1.06       | -1.56        | -1.64      | -1.78        | -2.46      | -5.09        |
| 1570244_at   | ---        | ---                  | 0                                    | ---     | 1.66          | 1.49            | -1.67     | -1.53       | 3.22      | 1.07        | 1.12       | 1.07         | 1.21       | 2.94         | -6.18      | -2.21        |
| 1570284_x_at | ---        | ---                  | 0                                    | ---     | 2.05          | 1.16            | -1.10     | -5.67       | -4.62     | 1.32        | -1.45      | -1.44        | 2.09       | 2.12         | -4.19      | -5.78        |
| 1570296_at   | ---        | ---                  | 0                                    | ---     | 1.60          | -2.17           | -1.48     | -1.12       | -1.58     | -2.49       | -2.42      | -1.73        | -2.27      | -1.39        | 8.70       | -1.63        |
| 1570332_at   | ---        | ---                  | 0                                    | ---     | -1.62         | -1.73           | -1.02     | -1.16       | 1.43      | -1.39       | -2.54      | -1.58        | 1.09       | 1.13         | -1.38      | -1.00        |
| 1570338_at   | ---        | ---                  | 0                                    | ---     | 1.20          | 1.01            | 1.64      | 1.66        | 1.69      | -1.19       | -1.66      | -1.18        | -1.44      | -1.93        | -3.24      | -2.32        |
| 1570339_x_at | ---        | ---                  | 0                                    | ---     | 2.08          | 1.53            | 1.59      | 1.59        | 1.25      | 1.16        | 1.50       | 1.11         | -1.74      | -1.75        | -2.66      | -2.91        |
| 1570344_at   | ---        | ---                  | 0                                    | ---     | -1.98         | -3.57           | 2.69      | 1.61        | -8.60     | -1.67       | 1.76       | 1.27         | -1.67      | 1.95         | -1.79      | -2.08        |
| 1570439_at   | ---        | ---                  | 0                                    | ---     | -1.47         | -2.51           | 1.56      | 1.18        | 1.38      | 1.16        | 1.77       | 1.10         | -1.50      | -1.14        | -1.44      | -1.87        |
| 1570552_at   | ---        | ---                  | 0                                    | ---     | -1.13         | 1.00            | -1.05     | -1.08       | -1.14     | -1.10       | -1.10      | -1.02        | -1.95      | -1.46        | -2.07      | -2.06        |
| 1570574_at   | ---        | ---                  | 0                                    | ---     | -1.86         | 1.82            | 3.84      | 1.67        | -1.02     | 1.73        | -5.96      | 1.24         | -2.01      | -1.26        | -3.77      | -4.26        |
| 1570578_at   | ---        | ---                  | 0                                    | ---     | 2.40          | 3.60            | -1.03     | -1.13       | 1.05      | 1.63        | 1.06       | -1.17        | 1.39       | 1.40         | 1.86       | 3.78         |
| 1570579_at   | ---        | ---                  | 0                                    | ---     | -1.87         | -1.12           | 1.22      | 1.06        | -1.20     | 2.11        | -2.10      | -1.20        | 1.94       | 1.81         | 1.02       | -1.12        |
| 1570592_a_at | ---        | ---                  | 0                                    | ---     | 4.34          | 8.87            | -1.40     | -1.72       | -2.36     | -4.48       | -2.42      | 1.01         | 4.62       | 5.60         | 2.11       | -1.44        |
| 1570635_at   | ---        | ---                  | 0                                    | ---     | -1.13         | -1.59           | -7.35     | -3.94       | 1.46      | 1.57        | -1.01      | -1.54        | 1.02       | 1.85         | -4.25      | -1.44        |
| 201205_at    | ---        | ---                  | 0                                    | ---     | -1.11         | -1.11           | -1.04     | 1.01        | 1.00      | 1.13        | -1.15      | -1.03        | 1.34       | 1.17         | 1.23       | 1.46         |

| ID          | Gene Title | Chromosomal Location | 1st Gene Ontology Biological Process    | Pathway | A2497 30 mins | A2497P' 30 mins | A2497 2 h | A2497P' 2 h | A2497 4 h | A2497P' 4 h | A2497 24 h | A2497P' 24 h | A2497 48 h | A2497P' 48 h | A2497 72 h | A2497P' 72 h |
|-------------|------------|----------------------|-----------------------------------------|---------|---------------|-----------------|-----------|-------------|-----------|-------------|------------|--------------|------------|--------------|------------|--------------|
| 203326_x_at | ---        | ---                  | blood vessel development                | ---     | -1.05         | -1.26           | 1.11      | 1.07        | 1.10      | 1.05        | 1.11       | -1.07        | -1.37      | -1.37        | -1.18      | -1.16        |
| 204782_at   | ---        | ---                  | 0                                       | ---     | -1.07         | -1.05           | 1.23      | 1.24        | 1.16      | 1.12        | 1.06       | -1.09        | 1.10       | 1.34         | 1.71       | 1.65         |
| 206428_s_at | ---        | ---                  | transcription, DNA-dependent            | ---     | -1.74         | -1.10           | 1.13      | 1.18        | -1.14     | -1.37       | 1.33       | 1.79         | -1.33      | -3.08        | 1.09       | -1.08        |
| 206548_at   | ---        | ---                  | 0                                       | ---     | -1.06         | 1.03            | -1.07     | -1.07       | 1.25      | 1.23        | -1.16      | -1.11        | -2.51      | -2.19        | -2.17      | -2.22        |
| 206962_x_at | ---        | ---                  | 0                                       | ---     | 1.93          | 1.62            | -1.26     | -1.33       | -1.08     | 1.07        | -1.64      | -1.37        | -1.16      | -1.25        | -1.82      | -1.78        |
| 207477_at   | ---        | ---                  | 0                                       | ---     | 1.79          | 2.11            | 3.88      | 5.00        | -7.01     | -1.85       | 2.03       | 2.16         | 2.77       | 3.16         | 1.47       | 1.97         |
| 207488_at   | ---        | ---                  | 0                                       | ---     | -1.33         | -1.48           | -1.03     | 1.18        | -1.05     | -1.65       | 1.02       | -1.34        | 2.26       | 2.22         | 3.28       | 3.50         |
| 207688_s_at | ---        | ---                  | growth                                  | ---     | -1.01         | -1.01           | -1.13     | -1.02       | -1.09     | -1.03       | 1.05       | 1.05         | 1.12       | 1.17         | -1.23      | -1.23        |
| 207875_at   | ---        | ---                  | 0                                       | ---     | 4.59          | 3.57            | -1.39     | -2.54       | 1.48      | 4.33        | -1.13      | 1.38         | -1.25      | 1.21         | 3.96       | 2.20         |
| 207917_at   | ---        | ---                  | 0                                       | ---     | 1.10          | 1.15            | 1.15      | 1.30        | -1.10     | -1.14       | -1.02      | 1.20         | 1.03       | -1.00        | -1.97      | -1.34        |
| 208154_at   | ---        | ---                  | 0                                       | ---     | 2.49          | 3.77            | -1.00     | -1.14       | -1.02     | 1.59        | -2.26      | -1.27        | -4.67      | -4.15        | -1.92      | -2.31        |
| 208254_at   | ---        | ---                  | immune response                         | ---     | 1.16          | 1.59            | -2.95     | -1.68       | 2.56      | 2.24        | -1.17      | -1.24        | -1.41      | -1.61        | -3.08      | -1.23        |
| 208849_at   | ---        | ---                  | 0                                       | ---     | 1.09          | -1.05           | 1.12      | -1.02       | 1.14      | 1.02        | 1.02       | -1.03        | -1.25      | -1.18        | 1.26       | 1.19         |
| 209446_s_at | ---        | ---                  | 0                                       | ---     | 1.10          | 1.20            | 1.02      | -1.17       | 1.08      | 1.16        | 1.03       | -1.12        | -1.57      | -1.31        | -1.45      | -1.27        |
| 209535_s_at | ---        | ---                  | small GTPase mediated signal transducti | ---     | 1.24          | 1.16            | 1.17      | -1.02       | 1.07      | -1.02       | -1.38      | -1.08        | -1.69      | -1.51        | -1.50      | -1.74        |
| 210230_at   | ---        | ---                  | 0                                       | ---     | 1.07          | -1.01           | 1.05      | 1.27        | 1.10      | 1.09        | 1.05       | -1.03        | -1.50      | -1.46        | -1.27      | 1.03         |
| 210524_x_at | ---        | ---                  | negative regulation of growth           | ---     | -1.02         | 1.04            | -1.02     | -1.19       | 1.17      | 1.14        | 1.06       | -1.03        | 1.55       | 1.38         | 1.44       | 1.51         |
| 210699_at   | ---        | ---                  | 0                                       | ---     | 1.30          | 1.05            | 1.11      | 1.21        | -1.01     | 1.10        | 1.17       | 1.15         | 1.11       | 1.26         | 1.22       | 1.32         |
| 211976_at   | ---        | ---                  | 0                                       | ---     | -1.08         | -1.07           | 1.03      | 1.03        | 1.05      | 1.06        | -1.09      | -1.04        | -1.03      | 1.06         | -1.30      | -1.15        |
| 212608_s_at | ---        | ---                  | 0                                       | ---     | -1.25         | -1.12           | -1.05     | -1.05       | 1.11      | 1.17        | -1.11      | -1.13        | -1.19      | 1.07         | -1.48      | -1.28        |
| 212847_at   | ---        | ---                  | 0                                       | ---     | 1.03          | -1.07           | 1.01      | 1.14        | -1.03     | 1.16        | -1.30      | -1.18        | -1.98      | -2.20        | -2.69      | -2.57        |
| 212874_at   | ---        | ---                  | 0                                       | ---     | -1.35         | -1.47           | -1.07     | 1.11        | -2.58     | -1.64       | -1.19      | -3.25        | -3.06      | 1.28         | -1.06      | 1.40         |
| 213048_s_at | ---        | ---                  | 0                                       | ---     | -1.02         | 1.04            | -1.03     | 1.02        | -1.03     | 1.01        | 1.04       | -1.08        | 1.24       | 1.10         | 1.03       | -1.06        |
| 213114_at   | ---        | ---                  | 0                                       | ---     | -1.09         | -1.04           | -1.04     | -1.01       | 1.01      | -1.00       | 1.14       | 1.08         | 1.22       | 1.15         | 1.29       | 1.44         |
| 213156_at   | ---        | ---                  | 0                                       | ---     | 1.00          | -1.04           | -1.04     | -1.05       | -1.16     | -1.08       | -1.02      | 1.18         | -1.36      | -1.31        | -1.38      | -1.56        |
| 213403_at   | ---        | ---                  | 0                                       | ---     | 1.15          | 1.07            | 1.28      | 1.24        | 1.14      | 1.08        | -1.05      | -1.11        | 1.24       | 1.06         | 1.68       | 1.48         |
| 213495_s_at | ---        | ---                  | 0                                       | ---     | -1.21         | -1.32           | 1.19      | 1.28        | 1.44      | 1.40        | 1.29       | 1.10         | 2.57       | 1.59         | 2.38       | 2.76         |
| 213500_at   | ---        | ---                  | 0                                       | ---     | 1.05          | -1.00           | 1.02      | 1.15        | 1.10      | 1.15        | -1.18      | -1.21        | 1.21       | 1.23         | 1.24       | 1.56         |
| 213557_at   | ---        | ---                  | 0                                       | ---     | 2.38          | 2.04            | 1.06      | -1.16       | 1.15      | 1.09        | 1.16       | 1.28         | -1.84      | -1.48        | -2.00      | -1.43        |
| 213598_at   | ---        | ---                  | 0                                       | ---     | 1.04          | -1.03           | 1.07      | 1.02        | 1.06      | 1.09        | -1.09      | -1.09        | -1.33      | -1.19        | -1.12      | -1.09        |
| 213602_s_at | ---        | ---                  | 0                                       | ---     | -3.33         | -3.08           | -1.06     | -1.46       | 1.45      | 1.59        | 1.35       | 1.03         | -1.31      | 1.49         | -1.30      | 1.09         |
| 213605_s_at | ---        | ---                  | 0                                       | ---     | 1.40          | 1.36            | 1.02      | -1.10       | -1.02     | 1.07        | -1.28      | -1.39        | -1.96      | -1.68        | -1.76      | -1.94        |
| 213619_at   | ---        | ---                  | 0                                       | ---     | 1.05          | 1.07            | -1.08     | -1.02       | -1.08     | 1.04        | -1.21      | -1.13        | -1.11      | 1.02         | -1.24      | -1.40        |
| 213658_at   | ---        | ---                  | 0                                       | ---     | -1.23         | 1.00            | -2.04     | 1.17        | 1.11      | -1.84       | -2.03      | 1.21         | 1.50       | 1.71         | 2.21       | 2.68         |
| 213662_at   | ---        | ---                  | 0                                       | ---     | 1.01          | -1.08           | 1.22      | 1.29        | 1.38      | 1.33        | 1.28       | 1.23         | -2.90      | -1.92        | -2.44      | -2.31        |
| 213663_s_at | ---        | ---                  | 0                                       | ---     | 1.10          | -1.03           | -1.08     | -1.20       | 1.08      | 1.09        | 1.03       | 1.05         | -2.87      | -2.38        | -2.83      | -2.48        |
| 213961_s_at | ---        | ---                  | 0                                       | ---     | 1.08          | 1.03            | 1.02      | 1.11        | 1.04      | -1.14       | 1.29       | 1.17         | -1.55      | -1.50        | -1.49      | -1.78        |
| 213979_s_at | ---        | ---                  | 0                                       | ---     | -1.01         | 1.04            | 1.01      | -1.01       | 1.00      | -1.04       | 1.09       | 1.03         | 1.23       | 1.07         | 1.02       | -1.03        |
| 214078_at   | ---        | ---                  | 0                                       | ---     | 1.06          | -2.21           | -4.26     | -1.57       | 1.20      | 2.80        | 2.72       | 2.48         | 31.67      | 27.60        | 2.27       | 1.80         |
| 214102_at   | ---        | ---                  | 0                                       | ---     | -1.02         | 1.03            | 1.17      | 1.49        | -1.02     | 1.17        | -1.26      | -1.08        | 2.17       | 1.85         | -1.21      | -1.02        |
| 214126_at   | ---        | ---                  | 0                                       | ---     | -1.11         | -1.21           | -1.01     | -1.23       | 1.11      | -1.00       | 1.02       | 1.02         | 1.20       | 1.39         | 1.17       | 1.23         |
| 214160_at   | ---        | ---                  | 0                                       | ---     | -1.53         | -1.29           | -1.28     | -1.44       | 1.03      | 1.34        | -1.31      | -1.55        | 1.20       | 1.09         | 1.68       | 1.27         |
| 214309_s_at | ---        | ---                  | 0                                       | ---     | 1.44          | -1.01           | 1.03      | 1.27        | -1.04     | 1.03        | 1.19       | 1.06         | -2.47      | -2.83        | -1.90      | -1.40        |
| 214353_at   | ---        | ---                  | 0                                       | ---     | 1.35          | 1.35            | 1.14      | 1.13        | 1.24      | 1.02        | -1.20      | 1.25         | -1.78      | -1.48        | -1.63      | -1.40        |
| 214373_at   | ---        | ---                  | 0                                       | ---     | 1.11          | 1.08            | -1.04     | 1.20        | 1.15      | 1.01        | 1.24       | 1.01         | -1.75      | -1.48        | -3.09      | -2.43        |
| 214731_at   | ---        | ---                  | 0                                       | ---     | 1.13          | 1.14            | 1.15      | 1.15        | 1.10      | 1.29        | 1.29       | 1.35         | -1.25      | -1.22        | -1.67      | -1.24        |
| 214967_at   | ---        | ---                  | 0                                       | ---     | 1.28          | 1.29            | 1.14      | -1.08       | -1.53     | -1.00       | -1.84      | -1.73        | -1.42      | 1.27         | 2.68       | 1.94         |
| 214996_at   | ---        | ---                  | 0                                       | ---     | -1.71         | -1.20           | -4.53     | 1.34        | 2.07      | 4.84        | 2.39       | 2.42         | 3.65       | 5.30         | 1.59       | -1.29        |
| 215056_at   | ---        | ---                  | 0                                       | ---     | 5.14          | 2.63            | 1.60      | 1.06        | 2.31      | 1.76        | 1.59       | 2.25         | 2.04       | 1.68         | -2.06      | -1.08        |
| 215083_at   | ---        | ---                  | 0                                       | ---     | -1.34         | 1.24            | -1.08     | -1.45       | 1.40      | 1.34        | -1.75      | -1.54        | -3.63      | -3.27        | -2.14      | -1.58        |
| 215128_at   | ---        | ---                  | 0                                       | ---     | -1.05         | -1.03           | 1.01      | -1.04       | 1.27      | 1.34        | -1.23      | 1.00         | -1.69      | -1.44        | -2.40      | -2.00        |
| 215204_at   | ---        | ---                  | 0                                       | ---     | 1.64          | 1.32            | 1.13      | 1.39        | 1.02      | 1.09        | -1.13      | -1.61        | -2.52      | -2.46        | -3.08      | -1.78        |
| 215212_at   | ---        | ---                  | 0                                       | ---     | 2.70          | 3.23            | -1.11     | -1.10       | 1.74      | 1.33        | 1.56       | 1.14         | -2.40      | -1.58        | -1.44      | -1.71        |
| 215251_at   | ---        | ---                  | 0                                       | ---     | 1.09          | 1.11            | 1.32      | 1.06        | -4.79     | -2.63       | 1.44       | 1.05         | 1.38       | 1.76         | -1.14      | 1.92         |
| 215306_at   | ---        | ---                  | 0                                       | ---     | 1.90          | 1.47            | 1.09      | 1.29        | 1.61      | 1.63        | -1.09      | 1.18         | -6.07      | -5.03        | -2.06      | -4.65        |
| 215312_at   | ---        | ---                  | 0                                       | ---     | 1.24          | 1.12            | 3.34      | 1.97        | -1.46     | 1.54        | 3.59       | 3.91         | 1.30       | 1.94         | 2.84       | 2.83         |
| 215373_x_at | ---        | ---                  | 0                                       | ---     | -1.38         | -1.38           | 1.01      | -1.03       | -1.16     | 1.04        | -1.06      | 1.04         | -1.27      | 1.19         | -1.20      | -1.36        |
| 215376_at   | ---        | ---                  | 0                                       | ---     | -1.03         | -1.70           | 1.64      | 1.51        | 1.59      | 1.40        | -1.17      | -1.13        | -2.02      | -1.44        | -1.29      | -2.07        |
| 215378_at   | ---        | ---                  | 0                                       | ---     | -1.26         | -1.74           | 1.01      | -1.07       | 1.14      | 1.15        | -1.09      | -1.21        | -1.75      | -2.15        | -2.82      | -3.23        |
| 215401_at   | ---        | ---                  | 0                                       | ---     | 1.95          | -1.20           | -1.20     | -1.17       | -1.01     | -1.10       | 1.30       | 1.20         | -2.80      | -1.99        | -2.70      | 1.25         |
| 215408_at   | ---        | ---                  | 0                                       | ---     | 1.28          | -1.04           | 1.26      | -1.35       | 1.17      | -1.01       | -1.07      | -1.38        | -2.02      | -3.01        | -1.60      | -2.23        |
| 215435_at   | ---        | ---                  | 0                                       | ---     | 1.38          | 1.05            | 1.08      | -1.21       | 1.09      | 1.21        | -1.39      | -1.14        | -2.29      | -1.71        | -1.80      | -3.05        |
| 215457_at   | ---        | ---                  | 0                                       | ---     | -1.31         | -1.81           | 1.78      | 2.21        | -2.10     | -1.16       | -1.19      | 1.03         | 2.11       | -1.55        | 1.13       | 1.51         |
| 215469_at   | ---        | ---                  | 0                                       | ---     | 1.09          | -1.07           | -1.10     | 1.24        | 1.09      | 1.39        | -1.45      | -1.03        | -1.79      | -1.34        | 1.06       | 1.04         |
| 215474_at   | ---        | ---                  | 0                                       | ---     | 2.28          | 2.39            | 1.55      | -1.21       | 1.28      | -1.27       | -1.25      | -1.04        | -3.43      | 1.03         | -1.80      | -2.23        |
| 215515_at   | ---        | ---                  | 0                                       | ---     | -1.17         | 1.09            | 1.08      | 1.06        | 1.13      | 1.31        | 1.14       | -1.16        | -1.82      | -3.23        | -3.22      | -2.15        |

| ID          | Gene Title | Chromosomal Location | 1st Gene Ontology Biological Process | Pathway | A2497 30 mins | A2497P' 30 mins | A2497 2 h | A2497P' 2 h | A2497 4 h | A2497P' 4 h | A2497 24 h | A2497P' 24 h | A2497 48 h | A2497P' 48 h | A2497 72 h | A2497P' 72 h |
|-------------|------------|----------------------|--------------------------------------|---------|---------------|-----------------|-----------|-------------|-----------|-------------|------------|--------------|------------|--------------|------------|--------------|
| 215525_at   | ---        | ---                  | 0                                    | ---     | -1.00         | 1.43            | 1.38      | 1.85        | 1.05      | 1.39        | -1.24      | 1.29         | -3.31      | -7.53        | -2.30      | -2.17        |
| 215545_at   | ---        | ---                  | 0                                    | ---     | 1.32          | 1.46            | 1.30      | 1.17        | 1.33      | 1.13        | -1.02      | 1.28         | -1.87      | -1.65        | -3.27      | -2.20        |
| 215555_at   | ---        | ---                  | 0                                    | ---     | 1.26          | 1.41            | -1.25     | -1.37       | -1.15     | -1.03       | -1.18      | 1.03         | -2.39      | -1.43        | -2.02      | -1.71        |
| 215574_at   | ---        | ---                  | 0                                    | ---     | 1.27          | 1.68            | -2.00     | -2.65       | -1.79     | 1.14        | -1.32      | -1.12        | -1.07      | -1.07        | -1.12      | 1.03         |
| 215576_at   | ---        | ---                  | 0                                    | ---     | -1.13         | -1.05           | -1.06     | 1.38        | -1.34     | 1.21        | -1.09      | -1.07        | -1.45      | -1.25        | -3.30      | -2.00        |
| 215577_at   | ---        | ---                  | 0                                    | ---     | -1.08         | -2.01           | -1.05     | -1.11       | -1.32     | 1.00        | 1.03       | -1.60        | -1.41      | -1.32        | -1.65      | -1.76        |
| 215604_x_at | ---        | ---                  | 0                                    | ---     | 1.23          | 1.08            | -1.20     | -1.14       | 1.01      | 1.08        | -1.42      | -1.43        | -1.40      | -1.48        | -1.88      | -1.73        |
| 215630_at   | ---        | ---                  | 0                                    | ---     | -1.27         | 1.68            | 1.27      | -1.79       | 4.71      | 5.22        | 2.34       | 2.77         | -1.91      | -1.47        | -3.43      | -5.74        |
| 215635_at   | ---        | ---                  | 0                                    | ---     | 1.08          | 1.35            | 1.27      | 1.02        | 1.07      | 1.24        | 1.26       | -1.15        | -2.31      | -1.93        | -2.47      | -2.20        |
| 215648_at   | ---        | ---                  | 0                                    | ---     | 1.51          | 1.78            | 1.09      | 1.13        | 1.08      | 1.05        | 1.57       | 1.24         | -3.29      | -1.62        | -2.14      | -2.12        |
| 215653_at   | ---        | ---                  | 0                                    | ---     | -1.03         | 1.07            | 1.77      | 1.67        | -1.07     | 1.33        | 1.15       | -1.29        | -3.13      | -2.46        | -3.26      | -3.55        |
| 215674_at   | ---        | ---                  | 0                                    | ---     | -2.44         | 1.31            | 1.74      | 1.50        | 1.18      | 1.60        | 1.23       | 1.01         | -2.21      | -2.09        | -2.42      | -4.81        |
| 215768_at   | ---        | ---                  | 0                                    | ---     | -1.80         | 1.17            | 1.03      | 1.15        | 1.43      | 1.05        | -1.50      | -1.32        | -2.27      | -1.45        | -2.74      | -3.69        |
| 215811_at   | ---        | ---                  | 0                                    | ---     | 1.13          | 1.04            | 1.12      | 1.05        | 1.48      | 1.62        | 1.12       | -1.16        | -3.03      | -2.66        | -2.21      | -2.76        |
| 215828_at   | ---        | ---                  | 0                                    | ---     | -1.25         | 1.07            | 1.01      | -1.14       | 1.05      | 1.18        | 1.32       | 1.20         | -1.73      | -1.31        | -1.66      | -1.24        |
| 215831_at   | ---        | ---                  | 0                                    | ---     | -2.58         | 1.32            | -7.23     | -7.66       | 3.75      | 4.78        | 3.34       | 3.77         | 1.31       | -1.43        | 1.65       | -2.41        |
| 215914_at   | ---        | ---                  | 0                                    | ---     | -1.45         | 1.19            | 1.18      | 2.19        | -1.29     | -3.85       | 1.26       | 1.17         | -2.02      | -2.01        | -4.49      | -3.42        |
| 216000_at   | ---        | ---                  | 0                                    | ---     | -3.04         | -1.42           | -1.11     | 1.10        | 1.89      | 2.02        | -1.58      | -1.29        | 1.19       | -1.02        | 2.57       | 2.59         |
| 216012_at   | ---        | ---                  | 0                                    | ---     | 1.39          | 1.34            | 1.08      | 1.01        | -1.04     | 1.33        | 1.03       | 1.00         | -3.57      | -3.06        | -2.49      | -1.98        |
| 216022_at   | ---        | ---                  | 0                                    | ---     | -1.00         | -1.09           | 1.21      | -1.18       | 1.12      | 1.13        | 1.18       | 1.10         | -1.33      | -1.52        | -2.45      | -2.52        |
| 216028_at   | ---        | ---                  | 0                                    | ---     | -1.07         | -1.11           | 1.11      | 1.21        | -1.01     | 1.03        | 1.03       | 1.13         | -1.01      | -1.01        | -1.80      | -1.43        |
| 216029_at   | ---        | ---                  | 0                                    | ---     | 1.35          | 1.42            | 1.23      | -1.13       | 1.27      | 1.27        | 1.06       | 1.22         | 1.25       | 1.16         | -1.45      | -2.11        |
| 216051_x_at | ---        | ---                  | 0                                    | ---     | -1.28         | 1.07            | -1.05     | 1.15        | -1.75     | 1.03        | -1.25      | -1.03        | -1.57      | -1.63        | -1.47      | 1.04         |
| 216101_at   | ---        | ---                  | 0                                    | ---     | -1.27         | 1.58            | -1.47     | -1.11       | 1.75      | 1.28        | 1.34       | 1.50         | -3.23      | -2.92        | -2.09      | -2.19        |
| 216108_at   | ---        | ---                  | 0                                    | ---     | 1.10          | 1.65            | 1.01      | 1.02        | -1.36     | -1.55       | 3.32       | 2.58         | 2.87       | 1.43         | 1.06       | 1.49         |
| 216112_at   | ---        | ---                  | 0                                    | ---     | 1.20          | 1.16            | 1.03      | 1.29        | 1.05      | 1.15        | 1.22       | 1.54         | -1.67      | -1.55        | -1.27      | -1.74        |
| 216142_at   | ---        | ---                  | 0                                    | ---     | -1.02         | -1.10           | 1.13      | -1.00       | -1.02     | -1.09       | -1.10      | -1.08        | -1.77      | -1.79        | -2.52      | -2.04        |
| 216165_at   | ---        | ---                  | 0                                    | ---     | 1.00          | -1.78           | 1.77      | 1.45        | 1.16      | -1.23       | 1.11       | 1.53         | -1.89      | 1.44         | -1.59      | -3.21        |
| 216169_at   | ---        | ---                  | 0                                    | ---     | 1.18          | 1.25            | -1.41     | -1.47       | 1.14      | 1.53        | -1.35      | 1.19         | 1.89       | 2.15         | 1.35       | -1.48        |
| 216171_at   | ---        | ---                  | 0                                    | ---     | 1.63          | -1.90           | -1.22     | 1.14        | 3.82      | 4.33        | -1.38      | 1.34         | 3.60       | 1.11         | 7.55       | 4.41         |
| 216172_at   | ---        | ---                  | 0                                    | ---     | 1.29          | 1.05            | 1.33      | 1.09        | 1.15      | 1.68        | -1.22      | -1.14        | -1.21      | -1.08        | 1.14       | 1.66         |
| 216179_x_at | ---        | ---                  | 0                                    | ---     | 1.06          | -1.04           | 1.02      | -1.11       | -1.04     | 1.03        | -1.09      | -1.03        | -1.58      | -1.31        | -2.35      | -3.18        |
| 216187_x_at | ---        | ---                  | 0                                    | ---     | 1.16          | 1.13            | 1.04      | 1.09        | -1.17     | 1.10        | -1.03      | -1.03        | -1.24      | -1.23        | -1.46      | -1.37        |
| 216201_at   | ---        | ---                  | 0                                    | ---     | -3.48         | 1.70            | 1.40      | 2.04        | -2.84     | -1.13       | 2.69       | 2.06         | 7.76       | 2.94         | -1.35      | 2.14         |
| 216214_at   | ---        | ---                  | 0                                    | ---     | -6.36         | 1.20            | -1.23     | -2.41       | 1.03      | 1.35        | -1.70      | -1.88        | 19.40      | 16.64        | -5.37      | 1.09         |
| 216229_x_at | ---        | ---                  | 0                                    | ---     | 1.33          | 1.29            | -1.20     | -1.09       | -1.32     | -1.01       | -1.10      | 1.12         | -1.30      | -1.18        | -1.80      | -1.67        |
| 216246_at   | ---        | ---                  | 0                                    | ---     | -1.09         | -1.03           | -1.06     | -1.03       | -1.04     | -1.06       | 1.09       | 1.02         | 1.33       | 1.08         | 1.05       | 1.01         |
| 216249_at   | ---        | ---                  | 0                                    | ---     | -1.33         | -1.05           | 1.01      | -1.04       | 1.05      | -1.16       | -1.03      | -1.25        | 1.14       | 1.14         | 1.08       | 1.05         |
| 216278_at   | ---        | ---                  | 0                                    | ---     | 1.48          | 1.06            | 1.42      | 1.14        | 1.03      | 1.02        | -1.48      | 1.64         | -4.27      | -2.65        | -2.22      | -2.30        |
| 216369_at   | ---        | ---                  | 0                                    | ---     | -2.23         | 1.01            | 1.56      | 1.11        | -1.76     | 2.00        | -14.05     | -1.47        | 1.64       | 2.31         | -1.32      | -1.36        |
| 216467_s_at | ---        | ---                  | 0                                    | ---     | 1.49          | 1.32            | -1.07     | -1.15       | -1.47     | -1.46       | 1.10       | 1.24         | -1.94      | -1.65        | -2.81      | -1.54        |
| 216497_at   | ---        | ---                  | 0                                    | ---     | 1.27          | 1.40            | -1.07     | -1.05       | -1.21     | 1.40        | -1.18      | -1.15        | -1.46      | -1.27        | -2.08      | -2.44        |
| 216500_at   | ---        | ---                  | plasma cell differentiation          | ---     | -1.08         | -1.03           | 1.50      | 1.34        | 1.13      | 1.07        | -1.14      | -1.36        | 1.62       | 1.33         | 1.82       | 1.98         |
| 216528_at   | ---        | ---                  | 0                                    | ---     | 1.20          | 1.21            | 1.44      | 1.52        | 1.47      | -1.25       | -1.17      | -2.03        | -1.92      | -1.00        | -2.29      | -2.48        |
| 216568_x_at | ---        | ---                  | 0                                    | ---     | -1.27         | -1.01           | -1.03     | -1.16       | -1.35     | 1.18        | -1.38      | -1.13        | -1.48      | -1.03        | -2.91      | -2.14        |
| 216635_at   | ---        | ---                  | 0                                    | ---     | 1.06          | -1.04           | 1.02      | 1.02        | 1.05      | 1.12        | -1.13      | -1.03        | -1.67      | -1.43        | -1.28      | -1.38        |
| 216636_at   | ---        | ---                  | 0                                    | ---     | 1.36          | 1.19            | 1.23      | -1.02       | 1.05      | 1.13        | -1.14      | -1.00        | -2.02      | -1.91        | -1.89      | -2.02        |
| 216656_at   | ---        | ---                  | 0                                    | ---     | 1.71          | 1.32            | 1.32      | 1.31        | 1.78      | 1.52        | 1.74       | 1.60         | 1.47       | 1.42         | 1.49       | 2.08         |
| 216683_at   | ---        | ---                  | 0                                    | ---     | 3.42          | 1.52            | -1.22     | -4.52       | 1.61      | 1.74        | -1.25      | -3.89        | -1.11      | 2.27         | 2.90       | 5.97         |
| 216702_x_at | ---        | ---                  | 0                                    | ---     | 1.89          | 1.62            | 1.12      | 1.02        | -1.04     | -1.09       | 1.19       | -1.01        | -1.31      | -1.10        | 1.43       | -1.26        |
| 216708_x_at | ---        | ---                  | 0                                    | ---     | -1.60         | -1.51           | -1.33     | -1.54       | 1.41      | -1.32       | 1.11       | 1.02         | 1.62       | 2.02         | -2.47      | -3.54        |
| 216731_s_at | ---        | ---                  | 0                                    | ---     | -4.85         | -2.91           | 2.50      | 2.38        | -2.00     | 1.88        | 1.51       | 2.61         | 2.21       | 5.85         | 8.99       | 8.99         |
| 216744_at   | ---        | ---                  | 0                                    | ---     | 1.36          | 1.18            | 1.10      | -1.15       | 1.70      | 1.10        | 1.03       | -1.50        | -4.76      | -3.26        | -1.99      | -1.77        |
| 216745_x_at | ---        | ---                  | 0                                    | ---     | -1.13         | -1.28           | -1.37     | 1.05        | 1.16      | 1.19        | -1.33      | 1.15         | -1.67      | -2.03        | 1.38       | 1.68         |
| 216751_at   | ---        | ---                  | 0                                    | ---     | 1.41          | 1.81            | 1.27      | 1.19        | -1.32     | -1.20       | 1.36       | 1.68         | -1.45      | -1.67        | -1.29      | -1.69        |
| 216764_at   | ---        | ---                  | 0                                    | ---     | 2.58          | -5.62           | 1.59      | 3.01        | 1.74      | 2.08        | -1.39      | 4.40         | -1.35      | 1.06         | 6.41       | 4.56         |
| 216773_at   | ---        | ---                  | 0                                    | ---     | 1.94          | 2.67            | -2.23     | 3.36        | 1.50      | 1.05        | 1.40       | 1.46         | 1.35       | 1.23         | -2.05      | -1.46        |
| 216783_at   | ---        | ---                  | 0                                    | ---     | -1.07         | 1.40            | -1.16     | -1.26       | 1.32      | 1.11        | 1.13       | 1.32         | -1.74      | -1.17        | -1.85      | -1.24        |
| 216788_at   | ---        | ---                  | 0                                    | ---     | -1.73         | -1.39           | -1.93     | -1.09       | -1.46     | -1.05       | 1.40       | 1.13         | 11.19      | 3.55         | 2.47       | 1.60         |
| 216794_at   | ---        | ---                  | 0                                    | ---     | -1.44         | -1.71           | 1.25      | -1.23       | 1.34      | 1.28        | 1.27       | -1.17        | -1.30      | -1.25        | -1.84      | -1.05        |
| 216802_at   | ---        | ---                  | 0                                    | ---     | 1.17          | -1.30           | 2.79      | -3.19       | -6.72     | -1.14       | -4.05      | -2.95        | -2.29      | -3.96        | 11.33      | 12.17        |
| 216856_s_at | ---        | ---                  | 0                                    | ---     | 1.06          | 1.09            | 1.12      | 1.01        | -1.10     | -1.17       | 1.02       | -1.25        | 1.06       | 1.00         | 1.33       | 1.06         |
| 216858_x_at | ---        | ---                  | 0                                    | ---     | -1.06         | -1.08           | 1.05      | 1.05        | 1.10      | 1.08        | -1.01      | -1.16        | -1.34      | -1.32        | -1.26      | -1.47        |
| 216859_x_at | ---        | ---                  | 0                                    | ---     | 1.01          | -1.04           | 1.07      | -1.02       | -1.07     | -1.36       | 1.06       | -1.15        | -1.05      | -1.19        | -1.58      | -1.58        |
| 216868_s_at | ---        | ---                  | 0                                    | ---     | -1.32         | -1.46           | 1.29      | 1.19        | 1.23      | 1.02        | 1.13       | -1.05        | -1.07      | -1.08        | -1.44      | -2.37        |
| 216978_x_at | ---        | ---                  | 0                                    | ---     | -2.66         | -4.08           | 1.78      | 2.02        | -1.34     | -1.13       | -2.90      | 1.97         | 4.90       | 1.06         | 1.24       | -1.38        |

| ID          | Gene Title | Chromosomal Location | 1st Gene Ontology Biological Process      | Pathway                    | A2497 30 mins | A2497P' 30 mins | A2497 2 h | A2497P' 2 h | A2497 4 h | A2497P' 4 h | A2497 24 h | A2497P' 24 h | A2497 48 h | A2497P' 48 h | A2497 72 h | A2497P' 72 h |
|-------------|------------|----------------------|-------------------------------------------|----------------------------|---------------|-----------------|-----------|-------------|-----------|-------------|------------|--------------|------------|--------------|------------|--------------|
| 217012_at   | ---        | ---                  | 0                                         | ---                        | -1.66         | -1.16           | -1.02     | -1.45       | -1.07     | -2.09       | 1.32       | 1.30         | 2.30       | 1.47         | 1.78       | 1.63         |
| 217034_at   | ---        | ---                  | 0                                         | ---                        | 1.29          | 2.08            | -1.76     | -1.80       | 1.20      | -1.58       | -3.18      | -1.68        | 1.17       | -1.17        | 1.10       | 1.25         |
| 217068_at   | ---        | ---                  | 0                                         | ---                        | 1.19          | -1.17           | 1.44      | 1.36        | -1.92     | -1.06       | 1.23       | 1.23         | 1.62       | -1.21        | 1.88       | 1.10         |
| 217079_at   | ---        | ---                  | 0                                         | ---                        | 2.24          | 3.18            | 1.32      | 2.28        | -5.80     | -3.30       | -1.75      | -1.10        | 1.21       | 2.07         | -2.07      | 1.47         |
| 217137_x_at | ---        | ---                  | 0                                         | ---                        | -1.21         | -1.16           | -1.09     | 1.02        | -1.18     | 1.13        | -1.01      | -1.00        | -1.17      | 1.08         | -1.60      | -1.94        |
| 217164_at   | ---        | ---                  | 0                                         | ---                        | 1.13          | -1.21           | -1.15     | -1.42       | 1.07      | 1.39        | -1.02      | 1.25         | -3.53      | -3.31        | -2.03      | -2.69        |
| 217278_x_at | ---        | ---                  | negative regulation of transcription from | ---                        | 2.24          | 1.86            | -2.15     | -1.54       | 3.71      | -1.16       | -1.61      | -1.51        | 2.33       | 1.63         | -1.48      | -1.80        |
| 217300_at   | ---        | ---                  | 0                                         | ---                        | 1.06          | 1.10            | 1.11      | -1.10       | 1.04      | -1.03       | -1.10      | -1.23        | 1.01       | 1.20         | 1.57       | 1.29         |
| 217328_at   | ---        | ---                  | 0                                         | ---                        | -1.20         | 1.55            | 1.14      | -2.12       | 2.37      | 2.58        | 1.39       | 1.41         | 6.67       | 5.65         | 5.96       | 4.00         |
| 217341_at   | ---        | ---                  | 0                                         | ---                        | 1.10          | -1.03           | 1.28      | 1.26        | -1.13     | -1.01       | 1.27       | 1.25         | -1.00      | -1.08        | -1.76      | -1.84        |
| 217409_at   | ---        | ---                  | 0                                         | ---                        | 1.22          | -1.12           | 1.23      | 1.09        | 1.24      | 1.20        | 1.04       | -1.43        | -2.31      | -1.80        | -4.73      | -2.20        |
| 217416_x_at | ---        | ---                  | 0                                         | ---                        | 1.18          | 1.10            | -1.02     | -1.11       | -1.03     | 1.03        | -1.13      | -1.12        | 1.04       | 1.06         | 1.33       | 1.20         |
| 217424_at   | ---        | ---                  | 0                                         | ---                        | 1.11          | -1.18           | 1.20      | -1.34       | -1.49     | 1.00        | -2.93      | -1.73        | 4.94       | 4.15         | 2.24       | -1.29        |
| 217426_at   | ---        | ---                  | cell adhesion                             | ---                        | 1.06          | 1.06            | 1.02      | 1.06        | 1.12      | 1.11        | -1.27      | -1.06        | -1.71      | -1.43        | -1.15      | -1.07        |
| 217482_at   | ---        | ---                  | 0                                         | ---                        | 1.62          | -1.03           | 1.10      | -1.26       | 1.44      | 1.45        | -1.12      | -1.14        | -2.11      | -1.66        | -1.51      | -1.69        |
| 217490_at   | ---        | ---                  | 0                                         | ---                        | 1.01          | -1.04           | -1.02     | 1.18        | -1.00     | 1.17        | 1.65       | 1.08         | 1.02       | -1.13        | -2.24      | -1.86        |
| 217498_at   | ---        | ---                  | 0                                         | ---                        | -1.08         | 1.03            | -1.05     | 1.20        | -1.02     | 1.17        | -1.03      | -1.06        | -1.16      | 1.01         | -2.11      | -1.68        |
| 217506_at   | ---        | ---                  | 0                                         | ---                        | 1.25          | 1.05            | 1.02      | -1.27       | 1.46      | 1.04        | 1.04       | -1.26        | -2.05      | -1.44        | -3.07      | -2.43        |
| 217570_x_at | ---        | ---                  | 0                                         | ---                        | -1.02         | -1.16           | 1.24      | 1.17        | 1.45      | 1.28        | -1.38      | 1.09         | -2.51      | -2.27        | -1.75      | -1.19        |
| 217579_x_at | ---        | ---                  | 0                                         | ---                        | 1.18          | 1.21            | 1.16      | 1.41        | -1.10     | 1.01        | 1.09       | -1.43        | -1.03      | 1.14         | -1.08      | -1.26        |
| 217614_at   | ---        | ---                  | 0                                         | ---                        | -1.17         | -1.29           | -1.11     | -1.10       | 1.08      | 1.03        | 1.37       | 1.01         | 1.31       | 1.31         | 1.17       | 1.39         |
| 217615_at   | ---        | ---                  | 0                                         | ---                        | 1.49          | 1.52            | -1.34     | -1.33       | 1.12      | 1.48        | 1.18       | 1.04         | -1.44      | -1.38        | -2.44      | -2.18        |
| 217617_at   | ---        | ---                  | 0                                         | ---                        | 1.51          | 1.34            | -1.00     | -1.23       | 1.22      | 1.23        | -1.00      | -1.03        | -2.75      | -2.79        | -2.66      | -2.91        |
| 217648_at   | ---        | ---                  | 0                                         | ---                        | 1.04          | -1.43           | -1.12     | 1.10        | -1.33     | -1.29       | -1.13      | -1.70        | 3.90       | 5.51         | -1.35      | -1.27        |
| 217651_at   | ---        | ---                  | 0                                         | ---                        | 1.21          | 1.04            | 1.00      | -1.39       | -1.19     | -1.28       | -1.37      | 1.00         | -1.68      | -1.81        | -2.28      | -1.64        |
| 217653_x_at | ---        | ---                  | 0                                         | ---                        | 1.14          | -1.19           | -1.06     | -1.15       | 1.11      | 1.42        | -1.04      | -1.02        | -1.59      | -1.48        | -1.52      | -1.38        |
| 217657_at   | ---        | ---                  | 0                                         | ---                        | 1.07          | -1.00           | -1.02     | -1.35       | 1.00      | -1.01       | -1.56      | -1.43        | 1.31       | 1.06         | 2.00       | 2.34         |
| 217666_at   | ---        | ---                  | 0                                         | ---                        | -1.20         | -1.27           | 1.21      | 1.00        | 1.34      | 1.21        | 1.08       | -1.07        | -2.11      | -1.59        | -4.53      | -18.29       |
| 217709_at   | ---        | ---                  | 0                                         | ---                        | 1.02          | 1.18            | -2.10     | -1.49       | -1.43     | -8.70       | -3.46      | -1.55        | 6.59       | 6.78         | 4.99       | 5.85         |
| 217712_at   | ---        | ---                  | 0                                         | ---                        | -1.14         | 1.02            | 1.11      | 1.28        | 1.79      | 2.68        | 1.49       | 1.46         | -2.94      | -2.47        | -2.58      | -2.17        |
| 218279_s_at | ---        | ---                  | 0                                         | ---                        | -1.12         | -1.09           | 1.05      | 1.04        | 1.05      | -1.04       | -1.02      | -1.11        | 1.28       | 1.18         | 1.59       | 1.40         |
| 220053_at   | ---        | ---                  | 0                                         | ---                        | -1.04         | -1.12           | 1.02      | -1.12       | 1.06      | 1.06        | -1.13      | -1.00        | -2.03      | -1.72        | -1.67      | -1.73        |
| 220296_at   | ---        | ---                  | 0                                         | ---                        | -2.30         | 1.24            | -1.52     | -1.32       | 2.16      | 1.59        | -1.23      | -1.10        | 2.19       | 2.61         | -2.99      | 1.02         |
| 220612_at   | ---        | ---                  | 0                                         | ---                        | 1.58          | 1.46            | 1.29      | -1.26       | 1.13      | 1.26        | -1.23      | -1.08        | -9.25      | -2.67        | -3.33      | -3.13        |
| 220682_s_at | ---        | ---                  | 0                                         | ---                        | -1.03         | 1.02            | 1.07      | -1.07       | -1.09     | -1.12       | 1.09       | 1.09         | 1.17       | 1.17         | 1.49       | 1.24         |
| 220692_at   | ---        | ---                  | 0                                         | ---                        | 1.04          | 1.11            | -1.54     | -1.55       | -1.49     | -1.02       | 1.41       | 1.41         | 1.20       | 1.00         | -1.05      | 1.35         |
| 220711_at   | ---        | ---                  | 0                                         | ---                        | -1.52         | -1.62           | -1.03     | -1.13       | 1.22      | 1.28        | -1.60      | -1.34        | -1.68      | -2.60        | -2.44      | -2.47        |
| 220728_at   | ---        | ---                  | 0                                         | ---                        | 2.22          | 1.39            | 1.10      | 1.20        | 1.26      | 1.05        | 1.00       | 1.12         | -2.58      | -1.79        | -1.63      | -1.29        |
| 220787_at   | ---        | ---                  | 0                                         | ---                        | -1.88         | 1.09            | 1.68      | 2.09        | -1.73     | -1.19       | 1.52       | 2.83         | 2.40       | 2.29         | -1.43      | -1.05        |
| 220857_at   | ---        | ---                  | 0                                         | ---                        | -2.84         | 1.99            | 1.56      | 3.13        | 6.09      | 2.29        | -2.12      | 5.66         | -1.62      | 1.14         | 1.32       | 1.39         |
| 220897_at   | ---        | ---                  | 0                                         | ---                        | 1.78          | 4.00            | 2.88      | 4.86        | 1.28      | -2.05       | 2.51       | 1.67         | -1.01      | -2.15        | 9.38       | 5.30         |
| 220905_at   | ---        | ---                  | 0                                         | ---                        | 1.45          | 2.38            | -1.04     | 1.03        | -1.02     | -1.02       | -1.11      | -1.32        | 1.17       | 1.14         | -1.79      | -1.86        |
| 220969_s_at | ---        | ---                  | 0                                         | ---                        | 1.09          | -1.15           | 1.04      | 1.06        | -1.04     | 1.05        | -1.13      | -1.07        | -2.58      | -1.94        | -2.28      | -2.02        |
| 221043_at   | ---        | ---                  | transcription, DNA-dependent              | ---                        | 1.11          | -1.03           | -1.00     | -1.08       | 1.13      | 1.06        | -1.27      | -1.09        | -2.45      | -2.36        | -2.19      | -2.06        |
| 221071_at   | ---        | ---                  | 0                                         | ---                        | -1.13         | -1.42           | 1.32      | 1.23        | 1.29      | 1.24        | -1.14      | -1.05        | -1.14      | -1.16        | -1.83      | -1.55        |
| 221145_at   | ---        | ---                  | 0                                         | ---                        | -1.50         | -1.66           | -3.55     | -3.06       | 1.24      | 1.49        | -5.22      | -1.47        | 2.21       | 1.68         | 1.90       | 1.33         |
| 221159_at   | ---        | ---                  | 0                                         | ---                        | -1.04         | -2.36           | -1.14     | -1.53       | 1.11      | 1.02        | 1.86       | 1.76         | 3.03       | 1.66         | 2.19       | 1.34         |
| 221202_at   | ---        | ---                  | 0                                         | ---                        | -1.02         | 1.15            | 1.04      | -1.30       | 1.24      | 1.54        | 1.07       | -1.69        | -2.14      | -1.96        | -1.68      | -1.87        |
| 221420_at   | ---        | ---                  | 0                                         | ---                        | -1.96         | -2.43           | -1.77     | 6.47        | 3.33      | 2.79        | 4.70       | 1.64         | -2.60      | -3.28        | -2.24      | -2.72        |
| 221852_at   | ---        | ---                  | 0                                         | ---                        | 1.21          | -1.42           | 1.79      | 1.36        | 4.43      | 1.84        | -2.39      | -3.47        | -1.63      | -1.30        | -1.12      | 1.57         |
| 222062_at   | ---        | ---                  | 0                                         | ---                        | 1.14          | 1.10            | 1.18      | 1.25        | -1.03     | -1.50       | 1.11       | -1.05        | 3.33       | 1.97         | 2.48       | 2.40         |
| 222069_s_at | ---        | ---                  | negative regulation of DNA replication    | Cell_cycle_KEGG // GenMAPP | 1.33          | 1.35            | 1.05      | 1.62        | -1.07     | 1.08        | -1.06      | -1.22        | 1.03       | -1.12        | -1.65      | -1.03        |
| 222170_at   | ---        | ---                  | 0                                         | ---                        | -1.03         | -1.00           | 1.08      | -1.09       | -1.13     | -1.03       | -1.30      | -1.10        | -1.63      | -1.43        | -2.77      | -1.91        |
| 222197_s_at | ---        | ---                  | 0                                         | ---                        | 1.07          | 1.12            | -1.29     | -1.19       | -1.01     | 1.03        | 1.03       | -1.01        | -1.37      | -2.11        | -2.39      | -2.04        |
| 222207_x_at | ---        | ---                  | 0                                         | ---                        | 1.07          | -1.08           | -1.03     | 1.08        | -1.19     | -1.12       | -1.08      | 1.04         | -1.01      | -1.11        | -1.09      | 1.04         |
| 222282_at   | ---        | ---                  | 0                                         | ---                        | 1.81          | 2.11            | 1.41      | 1.26        | -1.04     | 1.06        | -1.26      | 1.00         | -2.50      | -1.96        | -3.49      | -5.55        |
| 222288_at   | ---        | ---                  | 0                                         | ---                        | -1.03         | -1.03           | 1.04      | -1.10       | -1.16     | 1.01        | -1.06      | -1.12        | -1.35      | -1.15        | -2.18      | -2.03        |
| 222306_at   | ---        | ---                  | 0                                         | ---                        | 1.14          | 1.08            | -1.14     | -1.07       | -1.07     | 1.13        | 1.01       | -1.06        | -1.64      | -1.71        | -1.71      | -1.92        |
| 222308_x_at | ---        | ---                  | 0                                         | ---                        | -1.40         | -1.36           | 1.82      | 1.55        | 1.08      | 1.12        | 1.24       | 1.38         | 1.29       | -1.25        | -1.63      | -1.86        |
| 222322_at   | ---        | ---                  | 0                                         | ---                        | 1.16          | -1.41           | 1.29      | 1.37        | 1.31      | 1.73        | 1.40       | 1.23         | -3.74      | -8.25        | -1.36      | -2.08        |
| 222324_at   | ---        | ---                  | 0                                         | ---                        | -1.99         | -1.13           | -3.03     | -2.04       | -4.60     | -3.45       | 1.28       | 2.59         | 2.07       | 1.17         | -1.71      | -1.74        |
| 222335_at   | ---        | ---                  | 0                                         | ---                        | 1.98          | 1.70            | 1.07      | -1.08       | -1.35     | -1.03       | -1.33      | -1.25        | -2.47      | -3.36        | -3.50      | -3.35        |
| 222339_x_at | ---        | ---                  | 0                                         | ---                        | -1.09         | -1.08           | 1.07      | 1.03        | 1.19      | 1.20        | -1.19      | 1.00         | -1.52      | -1.52        | -1.91      | -1.83        |
| 222345_at   | ---        | ---                  | 0                                         | ---                        | -1.06         | -1.26           | 2.63      | 3.29        | -1.03     | -1.35       | -1.23      | -1.01        | 1.95       | 1.45         | 2.80       | 3.21         |
| 222347_at   | ---        | ---                  | 0                                         | ---                        | -1.00         | 1.05            | 1.35      | 1.26        | 1.29      | 1.05        | 1.05       | 1.26         | -2.27      | -1.75        | -3.71      | -3.08        |
| 222350_at   | ---        | ---                  | 0                                         | ---                        | 1.49          | 1.17            | 1.15      | 1.11        | 1.17      | 1.22        | 1.46       | 1.27         | 2.44       | 2.25         | 1.63       | 1.41         |

| ID          | Gene Title | Chromosomal Location | 1st Gene Ontology Biological Process | Pathway | A2497 30 mins | A2497P' 30 mins | A2497 2 h | A2497P' 2 h | A2497 4 h | A2497P' 4 h | A2497 24 h | A2497P' 24 h | A2497 48 h | A2497P' 48 h | A2497 72 h | A2497P' 72 h |
|-------------|------------|----------------------|--------------------------------------|---------|---------------|-----------------|-----------|-------------|-----------|-------------|------------|--------------|------------|--------------|------------|--------------|
| 222366_at   | ---        | ---                  | 0                                    | ---     | 1.04          | 1.09            | -1.05     | -1.03       | 1.15      | 1.24        | -1.06      | -1.03        | -1.89      | -1.89        | -1.68      | -1.61        |
| 222371_at   | ---        | ---                  | 0                                    | ---     | 1.17          | 1.26            | 1.07      | -1.19       | 1.25      | 1.36        | -1.47      | -1.14        | -1.70      | -2.19        | -2.21      | -2.20        |
| 222539_at   | ---        | ---                  | 0                                    | ---     | -1.05         | -1.10           | -1.05     | -1.14       | -1.02     | -1.13       | 1.15       | 1.34         | -1.83      | -1.31        | -2.27      | -2.59        |
| 222877_at   | ---        | ---                  | 0                                    | ---     | 1.17          | 1.40            | -1.15     | -1.08       | -1.00     | 1.03        | 1.29       | 1.09         | 1.13       | 1.18         | 1.01       | -1.36        |
| 222970_at   | ---        | ---                  | 0                                    | ---     | -2.72         | 1.64            | 12.30     | 16.53       | -1.36     | -1.09       | -2.28      | 2.54         | 2.64       | 2.27         | -1.06      | 1.31         |
| 223052_x_at | ---        | ---                  | 0                                    | ---     | -1.01         | -1.06           | 1.03      | -1.00       | 1.16      | 1.12        | 1.02       | -1.05        | 1.09       | 1.03         | 1.36       | 1.42         |
| 223633_s_at | ---        | ---                  | 0                                    | ---     | -1.04         | 1.04            | 1.06      | -1.26       | 1.22      | -1.04       | -1.17      | 1.01         | 1.59       | 1.29         | -1.12      | 1.25         |
| 223641_at   | ---        | ---                  | 0                                    | ---     | 1.04          | -1.00           | 1.08      | 1.07        | 1.13      | 1.24        | -1.18      | -1.26        | 1.07       | 1.12         | 1.14       | 1.24         |
| 224011_at   | ---        | ---                  | 0                                    | ---     | -1.59         | -1.38           | -1.03     | 1.05        | -1.36     | -1.54       | 1.20       | -1.12        | -2.56      | -2.19        | -2.42      | -1.78        |
| 224050_s_at | ---        | ---                  | proteolysis                          | ---     | 1.88          | 1.64            | 1.65      | 1.44        | -1.16     | -1.09       | 1.03       | -1.52        | 1.17       | 1.06         | 2.17       | 1.56         |
| 224051_at   | ---        | ---                  | proteolysis                          | ---     | -1.34         | 1.02            | -1.41     | -1.21       | 1.33      | -1.16       | 1.57       | -1.19        | 1.67       | 1.49         | 3.01       | 2.76         |
| 224080_at   | ---        | ---                  | 0                                    | ---     | -1.45         | -6.39           | 5.04      | 4.52        | -1.24     | 2.80        | 1.69       | -3.55        | 12.49      | 1.33         | 2.38       | 1.60         |
| 224089_at   | ---        | ---                  | 0                                    | ---     | 1.71          | 1.91            | 1.42      | 1.20        | 1.15      | 2.02        | 1.73       | -1.56        | 1.18       | 1.23         | -2.97      | -1.66        |
| 224109_at   | ---        | ---                  | 0                                    | ---     | 1.01          | -1.54           | -1.05     | 1.71        | 1.24      | -1.01       | -1.25      | -1.02        | -1.05      | -1.20        | 1.08       | 1.62         |
| 224127_at   | ---        | ---                  | 0                                    | ---     | -1.12         | -2.84           | -2.26     | 1.19        | 1.12      | -1.38       | -1.22      | 1.68         | 1.95       | 1.73         | -3.22      | -8.13        |
| 224216_at   | ---        | ---                  | 0                                    | ---     | -1.09         | -1.11           | -1.03     | 1.15        | -1.16     | -1.00       | -1.11      | 1.10         | -1.11      | -1.07        | -1.44      | -1.31        |
| 224237_at   | ---        | ---                  | 0                                    | ---     | -3.25         | 1.03            | -3.01     | -1.43       | -1.05     | 3.24        | 1.31       | -3.02        | 12.07      | 7.86         | 1.42       | -1.17        |
| 224241_s_at | ---        | ---                  | 0                                    | ---     | -1.22         | -1.24           | 1.03      | -1.13       | 1.11      | 1.06        | -1.06      | -1.07        | 1.74       | 1.85         | 1.44       | 1.71         |
| 224254_x_at | ---        | ---                  | 0                                    | ---     | 1.29          | 1.30            | 1.53      | 1.59        | 1.05      | 1.11        | 1.11       | 1.21         | -1.74      | -1.21        | -2.40      | -1.68        |
| 224316_at   | ---        | ---                  | 0                                    | ---     | -1.12         | -1.09           | 1.00      | -1.19       | 1.27      | 1.23        | -1.01      | 1.45         | -1.12      | 1.09         | 1.27       | -1.10        |
| 224346_at   | ---        | ---                  | methylation                          | ---     | -1.07         | -1.01           | -1.04     | -1.01       | 1.02      | -1.02       | 1.10       | 1.03         | 1.40       | 1.15         | 1.17       | 1.19         |
| 224349_at   | ---        | ---                  | 0                                    | ---     | 1.23          | -1.05           | 1.82      | 2.46        | 1.69      | 1.55        | -1.01      | -1.72        | 1.58       | 1.44         | -1.36      | -1.16        |
| 224375_at   | ---        | ---                  | 0                                    | ---     | -1.22         | -1.35           | -1.76     | -1.55       | -1.35     | 1.27        | -1.60      | 1.27         | -1.70      | -1.01        | -1.64      | -1.27        |
| 224438_at   | ---        | ---                  | 0                                    | ---     | -1.13         | 1.07            | -1.30     | -1.14       | -1.28     | -1.19       | 1.05       | -1.05        | 1.97       | 1.23         | 1.29       | 1.50         |
| 224545_at   | ---        | ---                  | 0                                    | ---     | -1.90         | -1.16           | -1.32     | -2.19       | 1.50      | 1.50        | -1.31      | -1.56        | 1.48       | -1.33        | 3.36       | 8.58         |
| 224549_x_at | ---        | ---                  | 0                                    | ---     | 1.12          | 1.10            | -1.01     | 1.00        | -1.08     | 1.08        | -1.10      | -1.03        | -1.44      | -1.35        | -1.73      | -1.61        |
| 224904_at   | ---        | ---                  | 0                                    | ---     | 1.04          | -1.05           | 1.06      | 1.09        | 1.08      | 1.07        | 1.06       | 1.04         | -1.23      | -1.04        | -1.03      | 1.15         |
| 225714_s_at | ---        | ---                  | 0                                    | ---     | 1.29          | 1.03            | 1.02      | -1.07       | 1.01      | 1.19        | -1.20      | -1.14        | -1.89      | -2.28        | -1.84      | -1.92        |
| 225906_at   | ---        | ---                  | 0                                    | ---     | 1.00          | -1.25           | -1.09     | -1.01       | -1.01     | -1.09       | -1.25      | -1.23        | -2.12      | -2.32        | -1.74      | -1.87        |
| 225917_at   | ---        | ---                  | 0                                    | ---     | 1.15          | 1.10            | -1.03     | -1.00       | -1.18     | 1.03        | -1.41      | -1.33        | -1.50      | -1.27        | -1.74      | -1.40        |
| 225934_at   | ---        | ---                  | 0                                    | ---     | -1.09         | -1.09           | -1.06     | -1.09       | 1.09      | 1.01        | -1.06      | -1.12        | -1.23      | -1.21        | -1.32      | -1.28        |
| 226102_at   | ---        | ---                  | 0                                    | ---     | 1.19          | 1.09            | -1.02     | -1.16       | -1.05     | -1.05       | -1.24      | -1.13        | -1.87      | -1.58        | -1.32      | -1.49        |
| 226138_s_at | ---        | ---                  | 0                                    | ---     | 1.21          | 1.29            | 1.10      | 1.02        | -1.08     | -1.04       | 1.29       | 1.13         | 1.50       | 1.28         | 1.20       | 1.12         |
| 226252_at   | ---        | ---                  | 0                                    | ---     | -1.34         | -1.46           | 1.17      | 1.05        | 1.16      | 1.12        | -1.02      | -1.14        | -1.24      | -1.23        | -1.29      | -1.21        |
| 226347_at   | ---        | ---                  | 0                                    | ---     | -1.10         | -1.11           | -1.08     | -1.15       | -1.04     | 1.06        | -1.02      | 1.03         | -1.15      | 1.21         | 1.22       | 1.50         |
| 226348_at   | ---        | ---                  | 0                                    | ---     | 1.09          | 1.08            | 1.10      | -1.00       | 1.06      | 1.11        | 1.12       | 1.02         | 1.34       | 1.72         | 1.68       | 2.25         |
| 226391_at   | ---        | ---                  | 0                                    | ---     | 1.17          | -1.06           | -1.05     | -1.16       | 1.24      | 1.08        | 1.03       | -1.05        | -1.46      | -1.54        | -1.17      | -1.28        |
| 226397_s_at | ---        | ---                  | 0                                    | ---     | 1.40          | 1.47            | -1.24     | -1.15       | 1.15      | 1.15        | -1.11      | -1.49        | -2.86      | -2.93        | -2.39      | -2.92        |
| 226444_at   | ---        | ---                  | 0                                    | ---     | 2.25          | 2.34            | 1.24      | 1.36        | 1.18      | 1.04        | -1.11      | -1.17        | -2.12      | -2.19        | -3.18      | -2.81        |
| 226560_at   | ---        | ---                  | 0                                    | ---     | -2.54         | -1.89           | -1.37     | 2.28        | -1.42     | -1.38       | 1.02       | -1.70        | 6.73       | 5.79         | -1.80      | 1.29         |
| 226834_at   | ---        | ---                  | 0                                    | ---     | -1.01         | -1.09           | 1.07      | 1.03        | 1.06      | 1.02        | 1.08       | -1.00        | 1.55       | 1.59         | 2.15       | 2.16         |
| 226848_at   | ---        | ---                  | 0                                    | ---     | -1.01         | -1.03           | 1.05      | 1.24        | 1.11      | 1.13        | 1.07       | 1.13         | -1.48      | -1.89        | -1.74      | -1.38        |
| 227051_at   | ---        | ---                  | 0                                    | ---     | -1.08         | -1.04           | 1.04      | -1.10       | -1.19     | -1.01       | -1.24      | -1.15        | -2.55      | -2.05        | -2.92      | -3.36        |
| 227061_at   | ---        | ---                  | 0                                    | ---     | 1.18          | 1.45            | 1.39      | 1.28        | 1.38      | 1.25        | -1.51      | -1.57        | -2.07      | -1.45        | 1.05       | -1.02        |
| 227082_at   | ---        | ---                  | 0                                    | ---     | -1.07         | -1.13           | 1.00      | -1.08       | -1.09     | 1.05        | -1.23      | -1.21        | -1.67      | -1.41        | -1.45      | -1.45        |
| 227107_at   | ---        | ---                  | 0                                    | ---     | -1.04         | -1.03           | -1.00     | -1.08       | 1.01      | 1.03        | -1.01      | 1.20         | 1.62       | 1.38         | 1.12       | 1.12         |
| 227121_at   | ---        | ---                  | 0                                    | ---     | 1.12          | 1.13            | 1.07      | -1.18       | 1.09      | 1.07        | -1.09      | 1.06         | -1.49      | -1.54        | -1.44      | -2.37        |
| 227122_at   | ---        | ---                  | 0                                    | ---     | 1.13          | 1.11            | 1.06      | 1.07        | 1.04      | 1.10        | -1.05      | 1.02         | -1.25      | -1.28        | 1.22       | 1.18         |
| 227227_at   | ---        | ---                  | 0                                    | ---     | -1.41         | -1.35           | 1.04      | 1.22        | 1.24      | 1.09        | 1.11       | 1.08         | -1.79      | -2.05        | -2.44      | -2.10        |
| 227244_s_at | ---        | ---                  | 0                                    | ---     | -1.04         | -1.08           | 1.00      | 1.13        | 1.04      | 1.02        | -1.06      | -1.10        | 1.06       | 1.04         | 1.34       | 1.52         |
| 227260_at   | ---        | ---                  | 0                                    | ---     | 1.85          | 1.88            | 1.11      | -1.30       | 1.13      | 1.28        | -1.03      | -1.44        | -1.75      | -1.93        | -1.43      | -2.43        |
| 227273_at   | ---        | ---                  | 0                                    | ---     | -1.11         | -1.27           | 1.06      | 1.08        | -1.42     | -1.17       | -1.18      | -1.06        | -2.16      | -1.62        | -1.45      | -1.23        |
| 227293_at   | ---        | ---                  | 0                                    | ---     | -1.06         | 1.00            | -1.01     | -1.14       | 1.10      | 1.13        | -1.32      | -1.14        | -1.39      | -1.52        | -1.52      | -1.44        |
| 227338_at   | ---        | ---                  | 0                                    | ---     | 1.05          | 1.16            | 1.03      | -1.11       | 1.03      | -1.03       | -1.08      | -1.12        | -2.02      | -1.81        | -1.85      | -2.45        |
| 227356_at   | ---        | ---                  | 0                                    | ---     | 1.29          | 1.22            | -1.02     | -1.08       | 1.17      | 1.07        | -1.22      | 1.14         | -2.30      | -2.38        | -1.77      | -1.94        |
| 227368_at   | ---        | ---                  | 0                                    | ---     | -1.04         | -1.04           | -1.00     | -1.01       | 1.39      | 1.08        | 1.04       | 1.05         | 1.28       | 1.39         | 1.69       | 1.59         |
| 227459_at   | ---        | ---                  | 0                                    | ---     | -1.12         | 1.11            | 1.08      | -1.06       | 1.03      | 1.15        | -1.37      | -1.15        | -1.38      | -1.28        | 1.16       | 1.08         |
| 227473_at   | ---        | ---                  | 0                                    | ---     | -1.07         | -1.04           | -1.03     | -1.11       | 1.03      | -1.00       | 1.04       | -1.04        | -1.30      | -1.20        | -1.77      | -1.75        |
| 227504_s_at | ---        | ---                  | 0                                    | ---     | 1.61          | 1.68            | -1.02     | 1.10        | -1.00     | -1.04       | 1.10       | 1.13         | -2.13      | -1.80        | -1.82      | -1.58        |
| 227505_at   | ---        | ---                  | 0                                    | ---     | 1.32          | 1.25            | 1.21      | -1.02       | 1.03      | -1.07       | -1.02      | -1.10        | -2.23      | -1.74        | -1.89      | -1.68        |
| 227508_at   | ---        | ---                  | 0                                    | ---     | -1.10         | -1.09           | 1.22      | 1.29        | -1.02     | 1.07        | -1.17      | -1.20        | -1.43      | -1.15        | -1.09      | 1.04         |
| 227576_at   | ---        | ---                  | 0                                    | ---     | 1.33          | 1.40            | 1.07      | 1.05        | 1.15      | 1.10        | 1.04       | -1.06        | -2.42      | -2.71        | -2.33      | -1.91        |
| 227603_at   | ---        | ---                  | 0                                    | ---     | 1.31          | 1.16            | 1.06      | 1.25        | 1.23      | 1.10        | -1.06      | -1.06        | -1.82      | -1.70        | -3.24      | -2.49        |
| 227663_at   | ---        | ---                  | 0                                    | ---     | 1.32          | 1.15            | 1.12      | -1.08       | 1.07      | 1.24        | 1.05       | -1.02        | -2.45      | -2.21        | -1.94      | -1.77        |
| 227729_at   | ---        | ---                  | 0                                    | ---     | -1.08         | -1.17           | 1.28      | 1.25        | 1.37      | 1.19        | 1.20       | 1.51         | 1.18       | 1.11         | 1.36       | 1.65         |
| 227777_at   | ---        | ---                  | 0                                    | ---     | 1.14          | -1.02           | 1.12      | -1.00       | 1.03      | -1.04       | -1.32      | -1.02        | -1.30      | -1.08        | 1.24       | 1.05         |

| ID          | Gene Title | Chromosomal Location | 1st Gene Ontology Biological Process | Pathway | A2497 30 mins | A2497P' 30 mins | A2497 2 h | A2497P' 2 h | A2497 4 h | A2497P' 4 h | A2497 24 h | A2497P' 24 h | A2497 48 h | A2497P' 48 h | A2497 72 h | A2497P' 72 h |
|-------------|------------|----------------------|--------------------------------------|---------|---------------|-----------------|-----------|-------------|-----------|-------------|------------|--------------|------------|--------------|------------|--------------|
| 227826_s_at | ---        | ---                  | 0                                    | ---     | 1.16          | 1.24            | -1.29     | 1.25        | -1.04     | -1.06       | 1.19       | 1.12         | 2.15       | 2.24         | 1.94       | 1.87         |
| 227827_at   | ---        | ---                  | 0                                    | ---     | 1.33          | 1.32            | -1.11     | 1.50        | 1.41      | 1.10        | 1.04       | 1.22         | 2.19       | 2.30         | 1.72       | 1.73         |
| 227853_at   | ---        | ---                  | 0                                    | ---     | -1.16         | -1.17           | 1.04      | 1.16        | 1.11      | -1.06       | 1.11       | 1.01         | 1.08       | 1.30         | 1.16       | 1.28         |
| 227854_at   | ---        | ---                  | 0                                    | ---     | -1.07         | 1.00            | 1.15      | 1.09        | -1.05     | 1.09        | -1.23      | -1.13        | -2.18      | -1.94        | -1.61      | -1.77        |
| 227881_s_at | ---        | ---                  | 0                                    | ---     | -1.09         | -1.15           | 1.03      | 1.03        | 1.01      | -1.10       | 1.15       | 1.24         | 1.08       | 1.10         | 1.08       | 1.12         |
| 227921_at   | ---        | ---                  | 0                                    | ---     | 1.07          | 1.11            | 1.09      | 1.11        | 1.15      | 1.30        | -1.30      | -1.10        | -2.36      | -1.88        | -2.31      | -2.22        |
| 227943_at   | ---        | ---                  | 0                                    | ---     | 1.17          | 1.03            | 1.20      | 1.29        | 1.24      | 1.27        | -1.38      | -1.34        | -1.87      | -1.64        | -1.54      | -1.52        |
| 227963_at   | ---        | ---                  | 0                                    | ---     | -1.21         | -1.62           | 1.00      | 1.18        | -1.27     | 1.17        | 1.33       | 1.39         | 2.11       | 1.98         | 3.96       | 4.48         |
| 227974_at   | ---        | ---                  | 0                                    | ---     | 1.10          | -1.13           | 1.07      | 1.10        | 1.08      | 1.18        | -1.33      | 1.04         | -3.94      | -4.05        | -2.68      | -2.60        |
| 228016_s_at | ---        | ---                  | 0                                    | ---     | -1.01         | -1.05           | 1.05      | 1.02        | -1.05     | -1.12       | 1.09       | -1.01        | 1.46       | 1.60         | 1.15       | 1.23         |
| 228045_at   | ---        | ---                  | 0                                    | ---     | -1.11         | 1.01            | 1.04      | -1.02       | -1.07     | -1.07       | -1.38      | -1.25        | -2.20      | -1.77        | -2.39      | -2.70        |
| 228105_at   | ---        | ---                  | 0                                    | ---     | 1.33          | 1.18            | 1.00      | -1.16       | 1.07      | 1.22        | 1.00       | -1.03        | -1.79      | -1.43        | -2.13      | -2.00        |
| 228116_at   | ---        | ---                  | 0                                    | ---     | 1.02          | -1.02           | 1.07      | 1.26        | -1.03     | 1.07        | 1.02       | 1.18         | -2.24      | -1.88        | -2.48      | -1.84        |
| 228156_at   | ---        | ---                  | 0                                    | ---     | -1.01         | 1.09            | 1.13      | -1.12       | 1.02      | 1.17        | -1.18      | -1.03        | -2.17      | -1.81        | -2.17      | -2.20        |
| 228187_at   | ---        | ---                  | 0                                    | ---     | 1.00          | -1.02           | 1.11      | -1.32       | 1.14      | -1.21       | -1.17      | -1.27        | -2.10      | -2.03        | -1.70      | -2.56        |
| 228196_s_at | ---        | ---                  | 0                                    | ---     | -1.06         | -1.06           | -1.05     | 1.01        | -1.05     | -1.08       | 1.01       | 1.10         | -1.10      | -1.10        | 1.39       | 1.28         |
| 228202_at   | ---        | ---                  | 0                                    | ---     | 2.61          | 1.91            | 1.34      | 1.71        | -2.68     | -2.03       | 2.39       | 1.84         | 4.99       | -1.45        | 10.53      | 5.26         |
| 228216_at   | ---        | ---                  | 0                                    | ---     | 1.12          | -1.03           | -1.12     | -1.24       | 1.03      | 1.06        | -1.51      | -1.25        | -1.65      | -1.18        | -1.58      | -1.32        |
| 228243_at   | ---        | ---                  | 0                                    | ---     | -1.09         | -1.12           | 1.32      | 1.42        | 1.30      | 1.39        | 1.39       | 1.09         | -2.31      | -3.79        | -1.42      | -1.62        |
| 228271_at   | ---        | ---                  | 0                                    | ---     | 1.19          | 1.01            | 1.30      | 1.46        | 1.30      | 1.18        | 1.11       | -1.05        | -1.53      | -1.81        | -1.49      | -1.79        |
| 228371_s_at | ---        | ---                  | 0                                    | ---     | -1.24         | 1.22            | -1.25     | -1.62       | 1.02      | -1.05       | 1.20       | -1.34        | 1.52       | 1.76         | 2.24       | 1.85         |
| 228389_at   | ---        | ---                  | 0                                    | ---     | -1.00         | -1.04           | 1.02      | 1.06        | 1.06      | 1.10        | -1.20      | -1.04        | -1.90      | -1.64        | -2.02      | -1.71        |
| 228455_at   | ---        | ---                  | 0                                    | ---     | 1.07          | 1.31            | 1.09      | 1.01        | 1.02      | 1.01        | 1.11       | -1.12        | -1.95      | -2.34        | -1.67      | -1.64        |
| 228464_at   | ---        | ---                  | 0                                    | ---     | -1.21         | 1.15            | -1.20     | -1.05       | 1.09      | 1.03        | -1.21      | -1.09        | -2.38      | -1.82        | -2.44      | -1.93        |
| 228469_at   | ---        | ---                  | 0                                    | ---     | 1.03          | -1.00           | 1.08      | 1.06        | 1.13      | -1.05       | -1.06      | -1.10        | -2.48      | -2.51        | -2.71      | -2.38        |
| 228487_s_at | ---        | ---                  | 0                                    | ---     | 1.07          | 1.07            | 1.03      | 1.04        | 1.02      | -1.01       | 1.01       | 1.04         | 1.44       | 1.39         | 1.33       | 1.28         |
| 228534_s_at | ---        | ---                  | 0                                    | ---     | 1.10          | 1.13            | -1.02     | -1.01       | -1.05     | -1.22       | -1.28      | -1.08        | -1.41      | -1.49        | -1.46      | -1.46        |
| 228541_x_at | ---        | ---                  | 0                                    | ---     | -1.01         | -1.04           | -1.18     | -1.21       | -1.28     | -1.01       | -1.23      | -1.17        | -1.27      | -1.14        | -1.37      | -1.55        |
| 228560_at   | ---        | ---                  | 0                                    | ---     | 1.37          | 1.37            | -1.13     | 1.07        | 1.03      | -1.13       | 1.06       | 1.43         | -1.25      | -1.56        | -1.68      | -2.44        |
| 228620_at   | ---        | ---                  | 0                                    | ---     | 1.42          | 1.35            | 1.20      | -1.10       | -1.28     | -1.20       | 1.02       | 1.09         | -1.94      | -2.07        | -2.37      | -1.55        |
| 228623_at   | ---        | ---                  | 0                                    | ---     | -1.09         | -1.04           | 1.02      | -1.08       | 1.30      | 1.34        | -1.04      | 1.02         | -2.69      | -2.74        | -2.94      | -2.55        |
| 228639_at   | ---        | ---                  | 0                                    | ---     | -1.04         | -1.05           | 1.07      | -1.13       | 1.15      | -1.10       | 1.27       | -1.05        | 1.11       | 1.04         | 1.34       | 1.35         |
| 228655_at   | ---        | ---                  | 0                                    | ---     | -1.14         | 1.06            | 1.15      | 1.01        | -1.12     | 1.02        | -1.59      | -1.01        | 1.15       | 1.06         | 1.12       | -1.13        |
| 228694_at   | ---        | ---                  | 0                                    | ---     | 1.03          | -1.00           | 1.01      | -1.03       | 1.15      | 1.11        | -1.62      | -1.23        | -2.35      | -2.25        | -2.11      | -2.01        |
| 228714_at   | ---        | ---                  | 0                                    | ---     | 1.10          | 1.34            | -1.03     | -1.18       | -1.07     | -1.17       | -1.43      | -1.44        | -2.18      | -2.51        | -7.47      | -4.84        |
| 228742_at   | ---        | ---                  | 0                                    | ---     | 1.93          | 2.46            | -4.71     | -1.91       | 1.76      | 2.82        | 2.05       | -1.98        | 2.34       | 1.95         | 1.59       | 1.98         |
| 228767_at   | ---        | ---                  | 0                                    | ---     | 1.90          | 1.40            | -1.15     | 1.05        | 1.62      | 2.05        | 1.41       | 2.01         | 2.98       | 2.87         | 1.15       | -1.15        |
| 228818_at   | ---        | ---                  | 0                                    | ---     | -1.03         | 1.13            | 1.00      | -1.04       | 1.04      | -1.02       | 1.14       | 1.03         | -1.54      | -1.45        | -1.66      | -1.25        |
| 228835_at   | ---        | ---                  | 0                                    | ---     | 1.16          | 1.22            | 1.32      | 1.07        | -1.09     | 1.19        | -1.32      | -1.26        | -1.64      | -1.26        | -1.38      | -1.44        |
| 228842_at   | ---        | ---                  | 0                                    | ---     | 1.02          | -1.05           | -1.18     | -1.16       | 1.43      | 1.21        | -1.20      | 1.13         | -4.93      | -3.72        | -3.14      | -2.39        |
| 228854_at   | ---        | ---                  | 0                                    | ---     | -1.19         | -1.95           | 1.59      | 3.47        | 4.14      | -2.41       | 1.25       | -3.03        | -1.46      | -1.24        | -1.04      | -2.42        |
| 228899_at   | ---        | ---                  | 0                                    | ---     | 1.13          | 1.09            | 1.11      | 1.14        | 1.03      | 1.00        | 1.14       | 1.01         | -3.06      | -1.71        | -1.66      | -2.10        |
| 228907_at   | ---        | ---                  | 0                                    | ---     | 1.31          | 1.11            | -1.26     | -1.58       | 1.36      | 1.26        | -1.12      | -1.12        | -1.83      | -1.79        | -1.18      | -1.14        |
| 228917_at   | ---        | ---                  | 0                                    | ---     | 1.04          | 1.12            | 1.06      | 1.18        | 1.04      | 1.04        | -1.04      | 1.15         | -1.61      | -1.70        | -1.22      | -1.28        |
| 228918_at   | ---        | ---                  | 0                                    | ---     | -1.28         | -1.16           | 1.08      | 1.24        | 1.40      | 1.13        | 1.21       | 1.32         | -1.18      | -1.83        | 1.16       | 1.18         |
| 228932_at   | ---        | ---                  | 0                                    | ---     | -1.20         | -1.03           | 1.12      | -1.00       | -1.09     | 1.08        | -1.26      | -1.16        | -1.39      | 1.01         | -1.04      | -1.01        |
| 228963_at   | ---        | ---                  | 0                                    | ---     | 1.09          | -1.01           | 1.13      | 1.05        | -1.03     | 1.06        | -1.18      | -1.04        | -1.32      | -1.17        | -1.26      | -1.29        |
| 228971_at   | ---        | ---                  | 0                                    | ---     | 1.10          | 1.08            | 1.02      | 1.09        | -1.16     | -1.02       | -1.66      | -1.19        | -3.03      | -2.53        | -2.88      | -2.59        |
| 229011_at   | ---        | ---                  | 0                                    | ---     | 1.33          | 1.17            | -1.08     | -1.40       | -1.10     | -1.20       | 1.12       | -1.07        | 1.97       | 1.50         | 1.66       | 1.64         |
| 229024_at   | ---        | ---                  | 0                                    | ---     | -1.01         | -1.08           | 1.03      | -1.01       | 1.05      | 1.04        | -1.01      | 1.04         | -2.15      | -1.66        | -2.02      | -1.99        |
| 229031_at   | ---        | ---                  | 0                                    | ---     | 1.00          | -1.02           | 1.04      | 1.03        | -1.03     | -1.26       | 1.36       | 1.37         | -1.40      | -1.26        | -1.71      | -1.39        |
| 229066_at   | ---        | ---                  | 0                                    | ---     | 1.03          | 1.02            | -1.06     | -1.10       | -1.16     | -1.31       | -1.25      | -1.11        | -1.20      | -2.21        | -1.43      | -1.49        |
| 229087_s_at | ---        | ---                  | 0                                    | ---     | 1.02          | -1.02           | -1.11     | 1.01        | -1.03     | -1.02       | -1.01      | 1.05         | 1.70       | 1.56         | 1.60       | 1.71         |
| 229108_at   | ---        | ---                  | 0                                    | ---     | -1.70         | 1.37            | -2.54     | -2.45       | 1.15      | -1.34       | 1.43       | -1.41        | -1.02      | -1.38        | 3.46       | 4.10         |
| 229111_at   | ---        | ---                  | 0                                    | ---     | -1.06         | -1.05           | 1.07      | 1.32        | 1.16      | 1.18        | -1.48      | -1.09        | -2.74      | -2.32        | -3.31      | -2.43        |
| 229123_at   | ---        | ---                  | 0                                    | ---     | -1.05         | -1.05           | 1.02      | 1.31        | 1.02      | 1.22        | -1.34      | -1.13        | -1.73      | -1.40        | -1.85      | -1.74        |
| 229136_s_at | ---        | ---                  | 0                                    | ---     | 1.06          | 1.17            | 1.00      | -1.44       | 1.39      | 1.73        | -1.76      | -1.54        | -1.58      | -1.17        | 1.10       | -1.11        |
| 229155_at   | ---        | ---                  | 0                                    | ---     | -1.21         | -1.26           | -1.04     | -1.15       | 1.04      | -1.05       | 1.02       | -1.08        | -1.85      | -1.72        | -2.76      | -2.92        |
| 229161_at   | ---        | ---                  | 0                                    | ---     | 1.14          | -1.10           | 1.71      | 1.51        | 1.12      | 1.21        | -1.03      | -1.15        | 1.14       | 1.41         | -1.45      | -1.81        |
| 229202_at   | ---        | ---                  | 0                                    | ---     | -1.08         | -1.22           | -1.05     | -1.19       | 1.01      | -1.19       | 1.41       | 1.56         | -1.36      | -2.11        | -2.04      | -1.45        |
| 229206_at   | ---        | ---                  | 0                                    | ---     | 1.28          | 1.07            | -1.13     | 1.06        | 1.16      | 1.12        | 1.14       | 1.05         | -1.85      | -1.58        | -2.00      | -1.24        |
| 229226_at   | ---        | ---                  | 0                                    | ---     | -1.08         | -1.16           | -1.05     | -1.12       | 1.04      | 1.10        | -1.06      | -1.15        | 1.16       | 1.18         | 1.52       | 1.49         |
| 229243_at   | ---        | ---                  | 0                                    | ---     | 1.21          | 1.22            | 1.29      | 1.12        | 1.26      | 1.01        | 1.09       | -1.31        | -3.39      | -2.23        | -2.11      | -1.76        |
| 229249_at   | ---        | ---                  | 0                                    | ---     | 3.80          | 2.71            | 7.24      | 8.15        | -1.38     | -1.88       | 1.59       | -2.68        | -2.17      | -4.98        | -1.82      | -1.82        |
| 229255_x_at | ---        | ---                  | 0                                    | ---     | 1.02          | -1.02           | 1.10      | 1.04        | 1.00      | -1.05       | 1.03       | 1.08         | -1.34      | -1.26        | -1.34      | -1.21        |
| 229293_at   | ---        | ---                  | 0                                    | ---     | 1.40          | 1.57            | -1.37     | -1.69       | -1.31     | 1.42        | -1.64      | -1.35        | 1.32       | -1.14        | 1.69       | 2.10         |

| ID          | Gene Title | Chromosomal Location | 1st Gene Ontology Biological Process | Pathway | A2497 30 mins | A2497P' 30 mins | A2497 2 h | A2497P' 2 h | A2497 4 h | A2497P' 4 h | A2497 24 h | A2497P' 24 h | A2497 48 h | A2497P' 48 h | A2497 72 h | A2497P' 72 h |
|-------------|------------|----------------------|--------------------------------------|---------|---------------|-----------------|-----------|-------------|-----------|-------------|------------|--------------|------------|--------------|------------|--------------|
| 229315_at   | ---        | ---                  | 0                                    | ---     | 1.18          | -1.05           | 1.01      | -1.16       | 1.19      | 1.27        | -1.11      | 1.03         | -1.89      | -1.65        | -2.62      | -2.22        |
| 229321_s_at | ---        | ---                  | 0                                    | ---     | -1.20         | -1.32           | 1.11      | 1.05        | -1.08     | -1.19       | -1.16      | 1.05         | 1.30       | 1.49         | 1.42       | 1.41         |
| 229329_s_at | ---        | ---                  | 0                                    | ---     | 1.07          | -1.05           | -1.07     | -1.03       | 1.08      | 1.09        | 1.02       | 1.01         | 1.24       | 1.21         | 1.34       | 1.47         |
| 229333_at   | ---        | ---                  | 0                                    | ---     | 1.13          | 1.07            | 1.09      | 1.10        | -1.06     | 1.07        | -1.29      | -1.17        | -2.81      | -2.27        | -3.34      | -3.22        |
| 229366_at   | ---        | ---                  | 0                                    | ---     | -1.00         | 1.05            | 1.15      | 1.40        | 1.23      | 1.16        | -1.18      | 1.02         | -1.67      | -1.59        | -1.82      | -1.90        |
| 229371_at   | ---        | ---                  | 0                                    | ---     | 1.12          | -1.01           | 1.02      | 1.01        | -1.05     | 1.13        | -1.27      | -1.17        | -2.39      | -2.10        | -2.09      | -2.11        |
| 229413_s_at | ---        | ---                  | 0                                    | ---     | 1.65          | 1.60            | 1.34      | 1.05        | 1.05      | 1.21        | -1.57      | -1.14        | -1.97      | -1.82        | -1.31      | -1.49        |
| 229417_at   | ---        | ---                  | 0                                    | ---     | -1.04         | -1.15           | 1.24      | 1.17        | 1.08      | 1.04        | -1.28      | 1.12         | 1.05       | 1.02         | 1.28       | 1.43         |
| 229425_at   | ---        | ---                  | 0                                    | ---     | 1.32          | 1.01            | -1.06     | -1.01       | -1.03     | 1.08        | -1.20      | -1.08        | -2.14      | -1.75        | -2.15      | -2.09        |
| 229434_at   | ---        | ---                  | 0                                    | ---     | 1.23          | 1.05            | 1.13      | 1.14        | 1.12      | 1.18        | -1.14      | -1.14        | -1.79      | -2.04        | -2.00      | -1.57        |
| 229438_at   | ---        | ---                  | 0                                    | ---     | 1.41          | -1.15           | -1.02     | -1.12       | 1.16      | 1.47        | 1.08       | 1.23         | 1.65       | 1.28         | 2.95       | 2.83         |
| 229465_s_at | ---        | ---                  | 0                                    | ---     | 1.09          | 1.06            | -1.03     | -1.03       | 1.01      | -1.01       | -1.01      | 1.02         | -1.05      | 1.07         | -1.06      | -1.28        |
| 229470_at   | ---        | ---                  | 0                                    | ---     | -1.08         | 1.03            | 1.25      | 1.32        | 1.41      | 1.08        | -1.24      | 1.30         | 1.29       | 1.08         | -1.62      | -1.30        |
| 229483_at   | ---        | ---                  | 0                                    | ---     | 1.28          | 1.36            | -1.11     | -1.06       | -1.01     | 1.06        | 1.04       | 1.05         | -2.19      | -1.64        | -2.65      | -2.43        |
| 229490_s_at | ---        | ---                  | 0                                    | ---     | -1.06         | 1.06            | 1.05      | 1.07        | -1.02     | -1.03       | 1.05       | 1.12         | 1.04       | 1.07         | -1.13      | -1.06        |
| 229505_at   | ---        | ---                  | 0                                    | ---     | -1.11         | -1.03           | -1.06     | -1.09       | -1.02     | -1.15       | 1.08       | 1.06         | 1.01       | -1.11        | -1.15      | -1.07        |
| 229525_at   | ---        | ---                  | 0                                    | ---     | 1.16          | 1.17            | 1.13      | -1.06       | 1.09      | -1.05       | -1.24      | 1.05         | -1.26      | -1.27        | -1.41      | -1.58        |
| 229531_at   | ---        | ---                  | 0                                    | ---     | 1.25          | 1.17            | -1.04     | 1.03        | 1.03      | -1.03       | -1.13      | -1.12        | -2.19      | -1.99        | -2.02      | -1.77        |
| 229541_at   | ---        | ---                  | 0                                    | ---     | 1.03          | 1.07            | -1.33     | -1.05       | -1.25     | -1.07       | 1.17       | 1.06         | -3.29      | -1.60        | -1.73      | -1.19        |
| 229544_at   | ---        | ---                  | 0                                    | ---     | 1.23          | 1.18            | -1.08     | 1.04        | -1.06     | 1.21        | -1.12      | -1.05        | -1.40      | -1.26        | -1.78      | -1.61        |
| 229548_at   | ---        | ---                  | 0                                    | ---     | 2.25          | 1.92            | 1.04      | 1.25        | 1.08      | 1.05        | 1.26       | 1.13         | -1.62      | -1.81        | -2.36      | -1.54        |
| 229570_at   | ---        | ---                  | 0                                    | ---     | -1.24         | 1.00            | 1.29      | -1.18       | 1.59      | 1.07        | -1.04      | -1.05        | -1.17      | 1.02         | -1.72      | -1.77        |
| 229575_at   | ---        | ---                  | 0                                    | ---     | 1.35          | 1.71            | -1.13     | 1.05        | 1.12      | 1.05        | -1.38      | -1.22        | -2.76      | -2.09        | -3.28      | -2.17        |
| 229602_at   | ---        | ---                  | 0                                    | ---     | 1.28          | 1.10            | 1.31      | -1.05       | 1.27      | 1.09        | 1.14       | -1.08        | -2.25      | -1.93        | -2.11      | -1.97        |
| 229615_at   | ---        | ---                  | 0                                    | ---     | 1.01          | -1.07           | 1.16      | 1.32        | 1.07      | 1.02        | -1.33      | -1.18        | -1.71      | -1.46        | -1.60      | -1.53        |
| 229636_at   | ---        | ---                  | 0                                    | ---     | -1.02         | 1.45            | 1.01      | -1.28       | -1.37     | -1.43       | -1.39      | -2.68        | 1.24       | 1.56         | 1.54       | 1.74         |
| 229681_at   | ---        | ---                  | 0                                    | ---     | 1.06          | -1.07           | 1.64      | 1.97        | 1.01      | -1.50       | 1.69       | 1.23         | -1.99      | -1.22        | -1.02      | -1.29        |
| 229692_at   | ---        | ---                  | 0                                    | ---     | 1.23          | 1.27            | 1.30      | 1.31        | 1.00      | 1.46        | -1.15      | -1.14        | -2.75      | -2.50        | -1.98      | -2.10        |
| 229695_at   | ---        | ---                  | 0                                    | ---     | 1.62          | 1.32            | 1.11      | -1.05       | 1.37      | 1.16        | 1.51       | -1.52        | -2.78      | -2.16        | -3.13      | -2.20        |
| 229733_s_at | ---        | ---                  | 0                                    | ---     | 1.04          | 1.08            | 1.08      | -1.23       | 1.02      | -1.02       | -1.53      | -1.18        | -2.00      | -1.62        | -1.81      | -1.96        |
| 229757_at   | ---        | ---                  | 0                                    | ---     | 1.05          | 1.04            | 1.11      | 1.18        | -1.10     | 1.00        | -1.30      | -1.13        | -2.00      | -1.57        | -1.44      | -1.27        |
| 229780_at   | ---        | ---                  | 0                                    | ---     | 1.56          | 1.43            | -1.36     | -1.14       | 1.06      | 1.19        | 1.00       | -1.20        | 1.03       | -1.18        | 2.21       | 2.02         |
| 229788_s_at | ---        | ---                  | 0                                    | ---     | -1.18         | -1.59           | -1.36     | -1.13       | -1.03     | -1.31       | -1.02      | 1.04         | -1.46      | -1.26        | 1.41       | 1.54         |
| 229795_at   | ---        | ---                  | 0                                    | ---     | 1.79          | 1.89            | -1.03     | 1.12        | -1.06     | -1.03       | -1.04      | 1.03         | -1.57      | -2.17        | -1.76      | -1.91        |
| 229810_at   | ---        | ---                  | 0                                    | ---     | -1.03         | -1.06           | -1.04     | 1.01        | -1.15     | 1.01        | 1.04       | -1.20        | 1.10       | -1.74        | -1.43      | ---          |
| 229814_at   | ---        | ---                  | 0                                    | ---     | -1.11         | -1.11           | -1.30     | 1.20        | -1.16     | -1.17       | 1.18       | -1.05        | 1.66       | 1.69         | 1.79       | 1.58         |
| 229821_at   | ---        | ---                  | 0                                    | ---     | -1.27         | -1.23           | -1.06     | -1.00       | 1.09      | -1.05       | 1.05       | 1.13         | -2.12      | -2.45        | -4.41      | -4.83        |
| 229822_at   | ---        | ---                  | 0                                    | ---     | -1.02         | -1.07           | 1.00      | 1.03        | -1.02     | -1.14       | -1.10      | -1.06        | -1.18      | -1.24        | -1.27      | -1.21        |
| 229858_at   | ---        | ---                  | 0                                    | ---     | 1.46          | -1.04           | 1.12      | -1.05       | -1.21     | -1.14       | 1.03       | 1.11         | -1.41      | -1.46        | -1.94      | -2.12        |
| 229859_at   | ---        | ---                  | 0                                    | ---     | -1.30         | -1.06           | -1.02     | 1.01        | -1.01     | -1.25       | -2.47      | -1.73        | 1.06       | -1.33        | -1.46      | -1.04        |
| 229879_at   | ---        | ---                  | 0                                    | ---     | 1.08          | -1.09           | -1.02     | -1.04       | 1.02      | -1.06       | 1.70       | 1.03         | 2.94       | 2.94         | 1.56       | 1.68         |
| 229904_at   | ---        | ---                  | 0                                    | ---     | -1.38         | -1.50           | 1.00      | 1.04        | 2.80      | 2.33        | 2.37       | 2.76         | 9.39       | 4.81         | 2.76       | -1.23        |
| 229928_at   | ---        | ---                  | 0                                    | ---     | 1.17          | -1.16           | 1.05      | -1.00       | 1.08      | 1.05        | -1.71      | -1.39        | -4.98      | -8.56        | -5.16      | -3.31        |
| 229934_at   | ---        | ---                  | 0                                    | ---     | -1.73         | -1.53           | -5.33     | 1.16        | -4.75     | -1.42       | 1.53       | 3.35         | 2.67       | 2.12         | 2.13       | 3.84         |
| 229948_at   | ---        | ---                  | 0                                    | ---     | -1.05         | -1.07           | -1.05     | 1.22        | 1.07      | 1.12        | -1.03      | -1.04        | -4.50      | -3.14        | -4.27      | -2.87        |
| 229950_s_at | ---        | ---                  | 0                                    | ---     | -1.14         | 1.08            | 1.11      | 1.31        | -1.13     | -1.27       | -1.02      | -1.12        | -1.27      | -1.27        | -1.05      | 1.24         |
| 229979_x_at | ---        | ---                  | 0                                    | ---     | 1.06          | 1.11            | 1.17      | 1.29        | 1.07      | -1.21       | 1.39       | 1.55         | -1.00      | -1.16        | -2.28      | -2.71        |
| 230039_at   | ---        | ---                  | 0                                    | ---     | -1.30         | -1.20           | 1.33      | 1.28        | -1.22     | -1.22       | 1.17       | 1.13         | 1.25       | 1.12         | 1.16       | 1.13         |
| 230053_at   | ---        | ---                  | 0                                    | ---     | 1.01          | -1.17           | -1.24     | -1.11       | -1.19     | -1.04       | 2.23       | 1.47         | -2.53      | -1.69        | -4.46      | -1.85        |
| 230082_at   | ---        | ---                  | 0                                    | ---     | -1.03         | -1.06           | -1.07     | -1.22       | -1.05     | -1.04       | -1.32      | 1.01         | -1.54      | -2.18        | -1.15      | -1.36        |
| 230118_at   | ---        | ---                  | 0                                    | ---     | -1.10         | -1.12           | 1.30      | 1.15        | 1.03      | -1.12       | -1.18      | 1.22         | 1.27       | 1.14         | 1.13       | 1.37         |
| 230136_at   | ---        | ---                  | 0                                    | ---     | -1.17         | 1.19            | 1.05      | 1.29        | -1.51     | -1.11       | -1.34      | -1.20        | -1.71      | -1.80        | -2.24      | -2.11        |
| 230198_at   | ---        | ---                  | 0                                    | ---     | 1.17          | -1.11           | 1.14      | -1.07       | 1.01      | 1.12        | 1.00       | -1.01        | -2.80      | -2.44        | -4.00      | -3.06        |
| 230199_at   | ---        | ---                  | 0                                    | ---     | 1.06          | 1.13            | 1.01      | 1.20        | -1.06     | 1.19        | -1.17      | -1.13        | 1.13       | 1.14         | 1.29       | 1.28         |
| 230202_at   | ---        | ---                  | 0                                    | ---     | -1.11         | -1.12           | 1.04      | 1.06        | 1.02      | -1.02       | 1.19       | 1.22         | 1.60       | 1.40         | 1.59       | 1.63         |
| 230223_at   | ---        | ---                  | 0                                    | ---     | -1.56         | -1.09           | -1.29     | 1.07        | 1.10      | -1.17       | -1.02      | 1.55         | -1.83      | -1.87        | -2.12      | -2.22        |
| 230240_at   | ---        | ---                  | 0                                    | ---     | 1.08          | 1.28            | 1.10      | -1.14       | 1.01      | 1.14        | 1.07       | 1.57         | 1.34       | 2.13         | 2.06       | ---          |
| 230260_s_at | ---        | ---                  | 0                                    | ---     | -1.38         | 1.12            | -1.20     | -1.12       | -1.37     | 1.46        | -1.29      | 1.01         | -1.22      | -1.41        | -2.31      | -3.16        |
| 230274_s_at | ---        | ---                  | 0                                    | ---     | -1.01         | -1.01           | 1.03      | 1.06        | 1.11      | 1.06        | 1.01       | -1.04        | -1.30      | -1.23        | -1.47      | -1.43        |
| 230305_at   | ---        | ---                  | 0                                    | ---     | 1.19          | -1.01           | 1.10      | -1.06       | 1.03      | -1.03       | -2.84      | -1.47        | -3.09      | -3.13        | -4.47      | -2.59        |
| 230314_at   | ---        | ---                  | 0                                    | ---     | 1.36          | 1.80            | 1.03      | 1.01        | 1.05      | -1.10       | 1.14       | -1.07        | 1.14       | 1.16         | -1.65      | -1.55        |
| 230315_at   | ---        | ---                  | 0                                    | ---     | -1.20         | -1.49           | 1.09      | 1.04        | -1.04     | 1.01        | 1.20       | 1.27         | 2.39       | 1.63         | 3.12       | 2.30         |
| 230333_at   | ---        | ---                  | 0                                    | ---     | -1.17         | 1.04            | 1.13      | 1.10        | -1.35     | 1.20        | 2.05       | 1.36         | 1.13       | 1.02         | 1.63       | 1.12         |
| 230339_at   | ---        | ---                  | 0                                    | ---     | 1.16          | 1.01            | 1.18      | 1.01        | 1.12      | 1.19        | -1.72      | -1.37        | -3.32      | -3.22        | -2.75      | -3.10        |
| 230343_at   | ---        | ---                  | 0                                    | ---     | -1.24         | -1.18           | -1.02     | 1.13        | -1.05     | -1.19       | 1.23       | 1.53         | 1.48       | 1.05         | 1.36       | 1.76         |
| 230346_x_at | ---        | ---                  | 0                                    | ---     | 1.08          | 1.08            | -1.01     | 1.23        | 1.08      | 1.02        | 1.02       | -1.13        | -1.12      | -1.02        | -1.05      | 1.03         |

| ID          | Gene Title | Chromosomal Location | 1st Gene Ontology Biological Process | Pathway | A2497 30 mins | A2497P' 30 mins | A2497 2 h | A2497P' 2 h | A2497 4 h | A2497P' 4 h | A2497 24 h | A2497P' 24 h | A2497 48 h | A2497P' 48 h | A2497 72 h | A2497P' 72 h |
|-------------|------------|----------------------|--------------------------------------|---------|---------------|-----------------|-----------|-------------|-----------|-------------|------------|--------------|------------|--------------|------------|--------------|
| 230350_at   | ---        | ---                  | 0                                    | ---     | 1.03          | -1.00           | -1.16     | -1.06       | -1.10     | -1.08       | -1.16      | -1.08        | -2.00      | -2.10        | -1.70      | -1.76        |
| 230357_at   | ---        | ---                  | 0                                    | ---     | 1.29          | 1.06            | 1.18      | -1.15       | -1.02     | -1.68       | 1.37       | 1.14         | -1.35      | -1.28        | 1.37       | 1.15         |
| 230387_at   | ---        | ---                  | 0                                    | ---     | 1.64          | 1.32            | 1.36      | 1.15        | 1.39      | 1.31        | -1.14      | -1.00        | -1.55      | -1.97        | -1.95      | -2.41        |
| 230401_at   | ---        | ---                  | 0                                    | ---     | 1.01          | -1.08           | 1.08      | 1.23        | 1.01      | 1.11        | 1.08       | 1.34         | -1.76      | -1.36        | -2.50      | -1.68        |
| 230413_s_at | ---        | ---                  | 0                                    | ---     | 1.04          | 1.08            | 1.00      | -1.12       | -1.11     | 1.03        | -1.19      | -1.01        | -1.52      | -1.45        | -1.79      | -1.99        |
| 230415_at   | ---        | ---                  | 0                                    | ---     | 1.04          | 1.20            | 1.25      | -1.09       | 1.44      | 1.38        | 1.35       | 1.20         | -1.60      | -1.67        | -2.51      | -2.14        |
| 230416_at   | ---        | ---                  | 0                                    | ---     | 1.17          | 1.10            | -1.11     | -1.27       | -1.11     | 1.08        | -1.22      | -1.08        | -1.53      | -1.25        | -1.17      | -1.35        |
| 230428_at   | ---        | ---                  | 0                                    | ---     | 1.02          | -1.20           | 1.23      | 1.12        | 1.14      | 1.07        | -1.45      | -1.03        | -2.67      | -3.75        | -3.15      | -3.47        |
| 230431_at   | ---        | ---                  | 0                                    | ---     | -1.38         | -1.16           | 1.51      | 1.30        | 1.47      | 1.15        | 1.36       | 1.29         | -1.93      | 1.01         | -2.15      | -1.99        |
| 230446_at   | ---        | ---                  | 0                                    | ---     | -1.28         | -1.41           | -1.06     | 1.35        | -1.15     | 1.49        | 1.04       | -1.05        | -1.08      | -1.84        | 1.03       | 1.28         |
| 230459_s_at | ---        | ---                  | 0                                    | ---     | -1.18         | -1.66           | 1.01      | 1.40        | -1.01     | -1.15       | 1.51       | 1.34         | 4.17       | 2.81         | 2.47       | 2.66         |
| 230461_s_at | ---        | ---                  | 0                                    | ---     | -1.24         | -1.32           | -1.04     | -1.19       | 1.23      | 1.23        | -1.40      | -1.13        | -1.82      | -1.68        | -2.18      | -1.49        |
| 230502_s_at | ---        | ---                  | 0                                    | ---     | -1.01         | 1.04            | -1.01     | -1.07       | -1.02     | 1.05        | 1.00       | -1.02        | -1.38      | -1.10        | -1.90      | -1.84        |
| 230503_at   | ---        | ---                  | 0                                    | ---     | 1.86          | 1.38            | 1.42      | 1.64        | 1.42      | 1.56        | 1.32       | -2.13        | 2.74       | 3.19         | 2.38       | 2.51         |
| 230571_at   | ---        | ---                  | 0                                    | ---     | -1.30         | -1.26           | -1.21     | 1.06        | -1.54     | -1.39       | 1.15       | 1.08         | -1.07      | -1.12        | 1.33       | 1.87         |
| 230586_s_at | ---        | ---                  | 0                                    | ---     | 1.05          | 1.03            | 1.08      | -1.12       | 1.09      | 1.10        | -1.25      | -1.25        | -1.53      | -1.49        | -1.14      | -1.33        |
| 230590_at   | ---        | ---                  | 0                                    | ---     | -1.02         | -1.03           | -1.12     | -1.42       | 1.21      | 1.27        | -1.13      | -1.25        | -2.05      | -2.28        | -1.02      | 1.12         |
| 230594_at   | ---        | ---                  | 0                                    | ---     | -1.25         | -2.46           | 1.57      | -1.03       | -2.03     | 1.27        | -2.60      | -2.27        | 1.33       | 1.29         | -19.97     | -1.97        |
| 230599_at   | ---        | ---                  | 0                                    | ---     | 1.23          | -1.03           | 1.32      | 1.31        | 1.50      | 1.64        | -1.59      | -1.14        | -1.71      | -2.11        | -1.63      | -2.07        |
| 230604_at   | ---        | ---                  | 0                                    | ---     | 1.00          | -1.04           | 1.17      | 1.18        | 1.08      | 1.10        | -1.14      | -1.06        | 1.43       | 1.29         | 2.08       | 1.66         |
| 230610_at   | ---        | ---                  | 0                                    | ---     | 1.01          | 1.12            | 1.12      | -1.13       | -1.08     | 1.15        | 1.02       | 1.05         | 1.07       | 1.48         | 1.53       | 1.53         |
| 230651_at   | ---        | ---                  | 0                                    | ---     | 1.09          | 1.04            | 1.32      | 1.42        | 1.33      | 1.39        | -1.11      | -1.04        | -1.90      | -1.59        | -1.64      | -1.62        |
| 230654_at   | ---        | ---                  | 0                                    | ---     | 1.38          | 1.54            | -1.12     | 1.01        | -1.12     | -1.33       | -2.11      | -1.23        | -2.01      | -2.11        | -1.95      | -1.30        |
| 230663_at   | ---        | ---                  | 0                                    | ---     | 1.05          | 1.12            | 1.10      | -1.44       | 1.22      | 1.40        | -1.00      | -1.16        | -1.03      | -1.25        | -1.60      | -1.46        |
| 230672_at   | ---        | ---                  | 0                                    | ---     | 1.06          | 1.05            | -1.06     | -1.12       | 1.22      | 1.39        | 1.50       | 1.02         | 1.45       | 1.51         | -1.23      | -1.18        |
| 230683_at   | ---        | ---                  | 0                                    | ---     | 1.07          | -1.22           | -1.13     | 1.04        | -1.01     | -1.01       | -1.22      | 1.04         | -1.55      | -1.35        | -1.74      | -1.21        |
| 230689_at   | ---        | ---                  | 0                                    | ---     | 1.07          | 1.17            | 1.02      | -1.14       | 1.07      | 1.19        | -1.03      | -1.07        | -2.23      | -2.40        | -1.35      | -1.62        |
| 230713_at   | ---        | ---                  | 0                                    | ---     | -1.01         | -1.21           | 1.42      | 1.73        | 1.17      | 1.30        | -1.19      | -1.25        | -1.86      | -1.45        | -1.85      | -1.41        |
| 230714_s_at | ---        | ---                  | 0                                    | ---     | 1.07          | 1.03            | 1.02      | 1.13        | -1.11     | -1.14       | 1.05       | 1.09         | 2.06       | 1.49         | 1.58       | 1.62         |
| 230729_at   | ---        | ---                  | 0                                    | ---     | 1.06          | 1.04            | 1.07      | -1.23       | -1.02     | 1.01        | -1.17      | 1.02         | -2.22      | -1.74        | -3.09      | -3.15        |
| 230746_s_at | ---        | ---                  | 0                                    | ---     | 1.13          | 1.36            | 1.03      | -1.01       | -1.65     | -1.60       | 1.13       | 1.12         | 2.97       | 2.86         | 8.13       | 7.77         |
| 230752_at   | ---        | ---                  | 0                                    | ---     | 1.02          | -1.18           | -1.05     | 1.05        | -1.07     | 1.03        | 1.07       | 1.22         | -2.33      | -2.12        | -1.73      | -2.47        |
| 230757_at   | ---        | ---                  | 0                                    | ---     | 1.03          | -1.12           | -1.08     | 1.55        | 1.16      | 1.06        | 1.26       | 1.09         | -1.66      | -1.69        | -1.89      | -1.73        |
| 230762_at   | ---        | ---                  | 0                                    | ---     | 1.30          | 1.27            | 1.20      | -1.06       | 1.03      | 1.17        | -1.36      | -1.01        | -2.45      | -2.42        | -2.12      | -1.51        |
| 230764_at   | ---        | ---                  | 0                                    | ---     | -1.03         | -1.04           | 1.12      | 1.20        | -1.12     | 1.09        | 1.19       | -1.04        | 1.27       | 1.27         | 1.36       | 1.28         |
| 230767_at   | ---        | ---                  | 0                                    | ---     | 1.04          | -1.06           | 1.10      | 1.21        | 1.22      | 1.21        | 1.02       | 1.12         | -1.59      | -1.76        | -1.59      | -1.63        |
| 230778_at   | ---        | ---                  | 0                                    | ---     | -1.39         | -1.04           | -1.17     | -1.23       | -1.93     | 1.28        | 1.13       | -1.37        | -1.09      | -1.01        | -2.44      | -2.39        |
| 230790_x_at | ---        | ---                  | 0                                    | ---     | 1.09          | -1.00           | -1.06     | -1.01       | -1.12     | 1.00        | -1.00      | -1.09        | -1.36      | -1.13        | -1.71      | -1.54        |
| 230791_at   | ---        | ---                  | 0                                    | ---     | 1.29          | 1.04            | -1.02     | -1.16       | 1.33      | 1.43        | 1.01       | -1.23        | -1.89      | -2.91        | -2.35      | -2.79        |
| 230809_at   | ---        | ---                  | 0                                    | ---     | -1.32         | -1.01           | 1.18      | 1.25        | -1.02     | 1.19        | 3.57       | 1.79         | 1.66       | -1.21        | -1.46      | 1.76         |
| 230843_at   | ---        | ---                  | 0                                    | ---     | 1.23          | 2.04            | 1.46      | 1.12        | 1.06      | 1.30        | -1.18      | -1.39        | -1.03      | -1.41        | -2.41      | -2.57        |
| 230848_s_at | ---        | ---                  | 0                                    | ---     | 1.00          | 1.04            | -1.02     | 1.01        | -1.09     | -1.03       | -1.12      | -1.05        | -1.23      | -1.13        | 1.00       | -1.05        |
| 230859_at   | ---        | ---                  | 0                                    | ---     | 1.01          | 1.14            | 1.02      | -1.08       | -1.08     | -1.19       | 1.16       | 1.30         | -2.23      | -2.65        | -1.97      | -1.76        |
| 230886_at   | ---        | ---                  | 0                                    | ---     | 1.44          | 1.48            | -1.01     | -1.06       | 1.11      | 1.16        | -1.04      | 1.09         | -1.83      | -1.68        | -1.77      | -1.28        |
| 230894_s_at | ---        | ---                  | 0                                    | ---     | 1.03          | 1.09            | 1.04      | -1.07       | -1.01     | 1.01        | -1.29      | -1.10        | -2.14      | -1.81        | -2.07      | -2.25        |
| 230913_at   | ---        | ---                  | 0                                    | ---     | -1.14         | -1.40           | 1.19      | 1.45        | 1.06      | 1.09        | 1.17       | 1.10         | -1.31      | -1.31        | -1.28      | -1.31        |
| 230921_s_at | ---        | ---                  | 0                                    | ---     | -1.12         | -1.01           | 1.08      | -1.09       | 1.03      | -1.05       | -1.13      | -1.05        | -1.40      | -1.24        | -1.50      | -1.54        |
| 230927_at   | ---        | ---                  | 0                                    | ---     | 1.31          | 1.04            | -1.34     | 1.06        | 1.04      | 1.27        | -2.01      | -1.38        | -2.99      | -1.81        | -1.87      | -2.27        |
| 230958_s_at | ---        | ---                  | 0                                    | ---     | -1.02         | -1.04           | -1.03     | 1.03        | 1.07      | 1.02        | -1.23      | -1.25        | -1.70      | -1.31        | -1.67      | -1.70        |
| 230979_at   | ---        | ---                  | 0                                    | ---     | -1.04         | -1.13           | 1.59      | 1.08        | 1.07      | -1.17       | -1.06      | -1.05        | -1.16      | -1.29        | 1.42       | 1.95         |
| 230987_at   | ---        | ---                  | 0                                    | ---     | 1.29          | 1.56            | -1.03     | -1.44       | -1.34     | 1.04        | 1.03       | 1.25         | -2.07      | -2.21        | -1.63      | -1.73        |
| 230999_at   | ---        | ---                  | 0                                    | ---     | 1.05          | -1.20           | -1.01     | 1.44        | -1.15     | 1.17        | 1.58       | 1.56         | 2.09       | 1.91         | -1.08      | 1.32         |
| 231002_s_at | ---        | ---                  | 0                                    | ---     | -1.02         | -1.00           | 1.02      | -1.02       | 1.03      | -1.03       | -1.04      | -1.03        | -1.16      | -1.16        | -1.19      | -1.21        |
| 231004_s_at | ---        | ---                  | 0                                    | ---     | 1.00          | 1.00            | -1.06     | -1.02       | -1.06     | -1.02       | 1.03       | 1.04         | 1.27       | 1.12         | 1.07       | -1.03        |
| 231013_at   | ---        | ---                  | 0                                    | ---     | -1.12         | -1.08           | 1.08      | 1.02        | 1.14      | -1.01       | 1.16       | 1.09         | -2.14      | -1.92        | -2.33      | -2.42        |
| 231047_at   | ---        | ---                  | 0                                    | ---     | 1.22          | -1.18           | -1.18     | 1.10        | -1.58     | 1.16        | -1.51      | 1.20         | -1.80      | -3.19        | -2.77      | -3.78        |
| 231055_at   | ---        | ---                  | 0                                    | ---     | 1.10          | 1.19            | 1.11      | 1.19        | 1.28      | 1.13        | -1.05      | 1.18         | -1.62      | -1.77        | 1.37       | 1.22         |
| 231057_at   | ---        | ---                  | 0                                    | ---     | 1.39          | 1.25            | 1.10      | 1.09        | 1.32      | 1.19        | -1.36      | -1.14        | -1.38      | -1.61        | -1.61      | -2.04        |
| 231069_at   | ---        | ---                  | 0                                    | ---     | 1.63          | 1.04            | 1.05      | -1.17       | 1.23      | -1.02       | 1.30       | 1.14         | -1.74      | -1.30        | -1.88      | -1.88        |
| 231086_at   | ---        | ---                  | 0                                    | ---     | 1.04          | -1.06           | -1.03     | -1.05       | 1.04      | 1.01        | -1.16      | -1.08        | -2.07      | -1.83        | -1.24      | -1.36        |
| 231087_at   | ---        | ---                  | 0                                    | ---     | 1.05          | -1.09           | -1.36     | -1.05       | -1.07     | 1.28        | -1.27      | -1.00        | -2.37      | -2.71        | -2.01      | -2.06        |
| 231090_s_at | ---        | ---                  | 0                                    | ---     | 1.35          | 1.07            | 1.04      | 1.18        | 1.01      | 1.18        | 1.10       | 1.02         | -1.97      | -1.76        | -1.39      | -1.93        |
| 231091_x_at | ---        | ---                  | 0                                    | ---     | -3.03         | -2.94           | -1.17     | -2.24       | -1.63     | 1.77        | 1.00       | -3.33        | 6.11       | 6.65         | 5.37       | 7.74         |
| 231098_at   | ---        | ---                  | 0                                    | ---     | -4.14         | -1.75           | -1.84     | -1.25       | -2.78     | -1.44       | -2.34      | 1.93         | 1.54       | 4.42         | 4.42       | 6.41         |
| 231110_at   | ---        | ---                  | 0                                    | ---     | -1.04         | -1.24           | -1.16     | -1.36       | -1.34     | 1.13        | -1.02      | 1.20         | 2.27       | 1.57         | 1.32       | 1.82         |
| 231136_at   | ---        | ---                  | 0                                    | ---     | -1.33         | 1.04            | 1.01      | -1.15       | 1.03      | 1.37        | 1.17       | 1.09         | -1.82      | -1.75        | -1.20      | -1.43        |

| ID          | Gene Title | Chromosomal Location | 1st Gene Ontology Biological Process | Pathway | A2497 30 mins | A2497P' 30 mins | A2497 2 h | A2497P' 2 h | A2497 4 h | A2497P' 4 h | A2497 24 h | A2497P' 24 h | A2497 48 h | A2497P' 48 h | A2497 72 h | A2497P' 72 h |
|-------------|------------|----------------------|--------------------------------------|---------|---------------|-----------------|-----------|-------------|-----------|-------------|------------|--------------|------------|--------------|------------|--------------|
| 231142_at   | ---        | ---                  | 0                                    | ---     | -1.30         | -1.41           | -1.27     | 1.32        | 1.26      | 1.37        | 1.15       | 1.99         | 1.16       | 1.48         | -1.33      | -1.18        |
| 231170_at   | ---        | ---                  | 0                                    | ---     | -1.06         | -1.24           | -1.07     | -1.51       | 1.59      | 1.08        | 1.28       | 1.27         | 2.07       | 1.98         | 2.38       | 2.38         |
| 231171_at   | ---        | ---                  | 0                                    | ---     | -1.25         | -1.16           | 1.07      | -1.06       | -1.21     | 1.11        | -1.52      | -1.43        | -3.96      | -3.82        | -2.84      | -2.55        |
| 231180_at   | ---        | ---                  | 0                                    | ---     | 5.28          | 3.33            | 1.67      | 1.50        | -2.01     | -1.19       | 7.11       | 3.47         | -2.49      | -2.69        | -6.91      | -2.72        |
| 231183_s_at | ---        | ---                  | 0                                    | ---     | -1.03         | -1.11           | -1.01     | -1.26       | 1.13      | 1.15        | 1.17       | 1.02         | 1.85       | 2.02         | 1.62       | 1.43         |
| 231205_at   | ---        | ---                  | 0                                    | ---     | 1.42          | 1.02            | -1.06     | 1.02        | 1.07      | 1.11        | 1.14       | 1.08         | -1.87      | -1.63        | -2.30      | -1.52        |
| 231207_at   | ---        | ---                  | 0                                    | ---     | 1.21          | 1.05            | 1.12      | -1.05       | 1.03      | 1.23        | -1.25      | -1.15        | -1.96      | -1.41        | -2.13      | -2.06        |
| 231214_at   | ---        | ---                  | 0                                    | ---     | 13.05         | 11.87           | 2.11      | -1.21       | 8.05      | 8.86        | -1.11      | 1.52         | 2.11       | -3.29        | 4.53       | 1.16         |
| 231225_at   | ---        | ---                  | 0                                    | ---     | -1.30         | 1.28            | 1.39      | 2.57        | -1.52     | -1.44       | -1.07      | -1.22        | -1.04      | 1.21         | 2.73       | 3.75         |
| 231227_at   | ---        | ---                  | 0                                    | ---     | 1.06          | 1.02            | -1.03     | 1.03        | -1.07     | 1.08        | -1.17      | -1.05        | -1.92      | -1.75        | -1.78      | -2.26        |
| 231239_at   | ---        | ---                  | 0                                    | ---     | 1.22          | 1.20            | 1.12      | -1.01       | 1.18      | -1.03       | -1.45      | -1.21        | -3.22      | -1.75        | -3.85      | -3.02        |
| 231274_s_at | ---        | ---                  | 0                                    | ---     | -1.10         | -1.04           | 1.03      | -1.02       | 1.17      | 1.17        | 1.23       | 1.06         | 1.46       | 1.70         | 1.37       | 1.57         |
| 231296_at   | ---        | ---                  | 0                                    | ---     | -1.10         | 1.14            | 1.14      | 1.17        | 1.09      | 1.12        | -1.04      | 1.02         | 1.36       | 1.41         | 1.31       | 1.21         |
| 231302_at   | ---        | ---                  | 0                                    | ---     | 1.11          | -1.17           | 1.02      | 1.10        | -1.16     | -1.06       | -1.24      | -1.15        | -1.39      | -1.16        | -1.40      | -1.61        |
| 231312_at   | ---        | ---                  | 0                                    | ---     | 1.06          | -1.06           | 1.09      | -1.07       | 1.24      | 1.11        | 1.26       | 1.29         | 1.65       | 1.53         | 1.40       | 1.41         |
| 231315_at   | ---        | ---                  | 0                                    | ---     | -1.39         | 3.44            | -1.32     | 1.01        | 2.17      | 1.14        | -1.28      | 1.55         | 1.26       | 2.26         | -1.86      | -2.57        |
| 231329_at   | ---        | ---                  | 0                                    | ---     | -1.05         | -1.18           | -1.09     | -1.73       | 1.12      | 1.14        | -1.05      | 1.05         | -3.27      | -2.80        | -2.04      | -3.26        |
| 231331_at   | ---        | ---                  | 0                                    | ---     | -1.24         | -1.31           | 1.03      | 1.08        | 1.05      | 1.04        | 1.00       | 1.12         | 1.05       | -1.11        | 1.17       | 1.04         |
| 231343_at   | ---        | ---                  | 0                                    | ---     | -1.03         | 1.06            | -1.07     | -1.19       | 1.00      | -1.11       | -1.38      | 1.02         | -2.23      | -2.34        | -1.33      | -1.31        |
| 231351_at   | ---        | ---                  | 0                                    | ---     | 1.00          | -1.11           | 1.40      | 1.37        | 1.02      | 1.12        | -1.25      | -1.13        | -2.01      | -1.82        | -2.66      | -1.88        |
| 231367_s_at | ---        | ---                  | 0                                    | ---     | 1.46          | 1.37            | -1.10     | -1.47       | -1.03     | -1.10       | -1.14      | -1.21        | -1.76      | -1.63        | -2.05      | -1.55        |
| 231374_at   | ---        | ---                  | 0                                    | ---     | 1.23          | 1.21            | -1.01     | 1.13        | -1.34     | 1.02        | -1.08      | -1.06        | -2.08      | -1.43        | -1.93      | -1.70        |
| 231392_at   | ---        | ---                  | 0                                    | ---     | -1.38         | -1.29           | 1.35      | -3.63       | 6.93      | 2.80        | -1.45      | 4.72         | 16.67      | 22.87        | 1.91       | -1.47        |
| 231394_at   | ---        | ---                  | 0                                    | ---     | -5.97         | -2.05           | -5.94     | -15.21      | 1.62      | 2.62        | -5.85      | -3.01        | 2.72       | 3.49         | 1.09       | -1.13        |
| 231401_s_at | ---        | ---                  | 0                                    | ---     | 1.04          | 1.03            | 1.08      | 1.02        | 1.15      | -1.04       | 1.11       | 1.02         | 1.10       | 1.03         | 1.22       | 1.17         |
| 231402_at   | ---        | ---                  | 0                                    | ---     | -1.08         | 1.33            | -1.28     | 1.80        | 4.89      | 3.06        | 1.37       | -1.47        | 1.12       | -1.70        | 6.21       | 11.49        |
| 231413_at   | ---        | ---                  | 0                                    | ---     | -3.12         | -1.10           | -1.99     | -1.16       | 1.76      | 2.29        | -1.16      | 1.01         | -2.55      | -2.10        | -3.06      | -3.31        |
| 231417_at   | ---        | ---                  | 0                                    | ---     | 6.51          | 5.18            | -1.51     | -1.78       | 1.16      | 1.08        | 2.54       | 6.60         | -1.08      | -1.49        | 2.70       | 2.20         |
| 231428_at   | ---        | ---                  | 0                                    | ---     | 1.23          | 1.11            | -1.03     | -1.14       | 1.33      | 1.34        | 1.27       | 1.11         | 8.48       | 5.14         | 4.41       | 4.44         |
| 231449_at   | ---        | ---                  | 0                                    | ---     | 1.18          | -1.06           | 1.47      | 1.42        | 1.19      | -1.02       | -1.11      | 1.23         | 1.95       | 1.59         | 1.51       | 1.37         |
| 231451_s_at | ---        | ---                  | 0                                    | ---     | 1.06          | 1.16            | -1.02     | -1.13       | 1.13      | 1.06        | 1.20       | -1.01        | 1.11       | 1.27         | 1.36       | 1.38         |
| 231457_at   | ---        | ---                  | 0                                    | ---     | 1.74          | 1.06            | -1.10     | 1.01        | 2.54      | 1.14        | 5.74       | 2.90         | 1.73       | 1.25         | 3.13       | 2.82         |
| 231471_at   | ---        | ---                  | 0                                    | ---     | 2.31          | -1.37           | 2.06      | 3.32        | 1.60      | 1.37        | -1.24      | 1.06         | 1.50       | 1.29         | 3.49       | -1.34        |
| 231489_x_at | ---        | ---                  | 0                                    | ---     | 1.15          | 1.00            | 1.12      | 1.16        | 1.09      | 1.19        | 1.31       | 1.01         | 1.18       | 1.57         | -1.03      | 1.05         |
| 231490_at   | ---        | ---                  | 0                                    | ---     | -2.90         | -3.84           | -1.50     | 2.44        | -2.07     | -2.29       | 3.20       | 2.19         | 1.29       | 1.83         | 1.43       | 4.99         |
| 231493_at   | ---        | ---                  | 0                                    | ---     | -1.09         | -1.05           | 1.03      | -1.10       | 1.23      | 1.08        | -1.15      | 1.06         | -4.75      | -3.76        | -5.35      | -5.65        |
| 231502_at   | ---        | ---                  | 0                                    | ---     | 1.41          | -1.20           | -1.05     | -1.30       | 1.13      | 1.29        | -2.22      | -1.16        | -1.65      | -1.84        | -1.87      | -2.86        |
| 231511_at   | ---        | ---                  | 0                                    | ---     | 1.12          | 1.14            | 1.02      | -1.08       | 1.05      | 1.05        | -1.01      | 1.01         | -1.45      | -1.19        | -1.58      | -1.99        |
| 231519_at   | ---        | ---                  | 0                                    | ---     | 1.44          | -1.25           | -1.11     | -1.79       | 1.52      | 1.28        | 2.32       | 1.70         | -1.02      | 1.81         | -1.16      | -2.93        |
| 231532_at   | ---        | ---                  | 0                                    | ---     | 1.27          | 1.44            | -3.47     | -1.20       | 1.33      | 2.14        | 1.38       | -1.89        | 1.23       | -1.29        | -1.60      | 1.12         |
| 231533_at   | ---        | ---                  | 0                                    | ---     | 1.31          | -1.66           | 1.26      | 1.14        | 1.08      | -1.03       | 1.05       | -1.32        | -2.78      | -8.79        | -3.62      | -3.43        |
| 231550_at   | ---        | ---                  | 0                                    | ---     | 1.03          | 1.03            | 1.08      | 1.14        | 1.15      | 1.08        | 1.39       | 1.25         | 1.80       | 1.53         | 1.44       | 1.38         |
| 231610_at   | ---        | ---                  | 0                                    | ---     | 1.21          | 1.16            | 1.15      | 1.03        | 1.05      | -1.01       | 1.24       | 1.14         | -1.71      | -1.57        | 1.08       | -1.08        |
| 231611_at   | ---        | ---                  | 0                                    | ---     | 9.08          | 13.12           | 1.99      | 1.41        | 1.55      | 1.52        | -1.33      | -1.74        | 1.54       | 1.30         | 1.68       | -1.59        |
| 231640_at   | ---        | ---                  | 0                                    | ---     | -1.06         | -1.06           | -1.05     | -1.29       | -1.09     | 1.07        | -1.02      | 1.07         | -1.40      | -1.29        | -1.52      | -1.81        |
| 231648_at   | ---        | ---                  | 0                                    | ---     | 2.53          | 2.61            | 2.07      | 1.08        | -2.60     | 1.03        | 6.65       | 3.44         | 1.95       | 2.70         | -2.35      | 1.72         |
| 231697_s_at | ---        | ---                  | 0                                    | ---     | 1.07          | 1.04            | -1.02     | 1.07        | 1.14      | 1.03        | 1.17       | 1.07         | -1.33      | -1.28        | -1.31      | -1.32        |
| 231827_at   | ---        | ---                  | 0                                    | ---     | -1.14         | -1.03           | -1.03     | 1.08        | 1.02      | -1.07       | 1.02       | 1.02         | -1.58      | -1.37        | -1.05      | 1.02         |
| 231937_at   | ---        | ---                  | 0                                    | ---     | 1.23          | 1.06            | 1.04      | 1.18        | 1.03      | 1.07        | -1.34      | -1.30        | -2.63      | -3.38        | -1.62      | -1.87        |
| 231979_at   | ---        | ---                  | 0                                    | ---     | 1.36          | 1.24            | 1.24      | -1.10       | 1.08      | 1.10        | 1.37       | 1.23         | -1.69      | -1.42        | -1.75      | -1.48        |
| 232002_at   | ---        | ---                  | 0                                    | ---     | 1.26          | 1.02            | -1.01     | 1.17        | 1.26      | 1.08        | 1.63       | 1.34         | -1.35      | 1.11         | 1.25       | 2.18         |
| 232113_at   | ---        | ---                  | 0                                    | ---     | 1.03          | -1.22           | 1.26      | 1.49        | -1.03     | 1.01        | 1.09       | 1.37         | -2.42      | -2.79        | -2.07      | -1.99        |
| 232118_at   | ---        | ---                  | 0                                    | ---     | -1.03         | -1.10           | 1.00      | 1.17        | 1.19      | 1.16        | -1.02      | -1.11        | -1.13      | -1.06        | -1.05      | -1.00        |
| 232125_at   | ---        | ---                  | 0                                    | ---     | -1.06         | 1.03            | -1.08     | -1.10       | -1.27     | 1.06        | -1.30      | -1.04        | -1.58      | -1.39        | -1.55      | -1.78        |
| 232130_at   | ---        | ---                  | 0                                    | ---     | 1.07          | 1.03            | -1.10     | -1.13       | 1.02      | 1.16        | -1.30      | -1.09        | -1.93      | -1.43        | -2.34      | -2.45        |
| 232134_at   | ---        | ---                  | 0                                    | ---     | -1.05         | -1.04           | 1.12      | 1.16        | 1.18      | 1.06        | 1.21       | 1.15         | -1.48      | -1.36        | -1.61      | -1.33        |
| 232144_at   | ---        | ---                  | 0                                    | ---     | 1.58          | 1.21            | 1.10      | -1.27       | -1.15     | 1.02        | -1.37      | -1.06        | -2.47      | -2.63        | -3.17      | -2.25        |
| 232156_at   | ---        | ---                  | 0                                    | ---     | -1.08         | -1.06           | -1.01     | -1.07       | 1.04      | -1.06       | -1.56      | -1.37        | -2.77      | -1.89        | -2.54      | -2.65        |
| 232159_at   | ---        | ---                  | 0                                    | ---     | 1.02          | 1.33            | -1.13     | -1.17       | 1.24      | 1.15        | 1.51       | 1.17         | -1.50      | -1.32        | -1.36      | -1.23        |
| 232174_at   | ---        | ---                  | 0                                    | ---     | 1.30          | 1.07            | -1.14     | -1.16       | 1.18      | 1.24        | 1.18       | -1.09        | -1.92      | -1.63        | -1.16      | -1.42        |
| 232205_at   | ---        | ---                  | 0                                    | ---     | 1.34          | 1.13            | -1.01     | -1.03       | -1.11     | 1.14        | -1.07      | 1.18         | -1.20      | -1.14        | -1.60      | -1.50        |
| 232210_at   | ---        | ---                  | 0                                    | ---     | -1.55         | -1.02           | 1.59      | 1.43        | 1.20      | 1.27        | 1.01       | -1.08        | -1.60      | -1.34        | -1.52      | -1.58        |
| 232218_at   | ---        | ---                  | 0                                    | ---     | 1.11          | 1.07            | 1.13      | 1.34        | 1.03      | -1.04       | 1.05       | 1.29         | -1.95      | -2.34        | -1.86      | -2.38        |
| 232223_at   | ---        | ---                  | 0                                    | ---     | -1.68         | -1.31           | -1.02     | 1.35        | 2.20      | -1.21       | -1.88      | 1.30         | 1.25       | 1.90         | 1.99       | 1.99         |
| 232225_at   | ---        | ---                  | 0                                    | ---     | -1.66         | 1.08            | -1.38     | -1.04       | 1.50      | 1.16        | 1.43       | 1.05         | -1.40      | -2.35        | -4.29      | -1.51        |
| 232236_at   | ---        | ---                  | 0                                    | ---     | 1.18          | 1.61            | 1.60      | 1.60        | -1.48     | -1.16       | -1.39      | -1.00        | -3.33      | -2.40        | -1.50      | -2.21        |

| ID          | Gene Title | Chromosomal Location | 1st Gene Ontology Biological Process | Pathway | A2497 30 mins | A2497P' 30 mins | A2497 2 h | A2497P' 2 h | A2497 4 h | A2497P' 4 h | A2497 24 h | A2497P' 24 h | A2497 48 h | A2497P' 48 h | A2497 72 h | A2497P' 72 h |
|-------------|------------|----------------------|--------------------------------------|---------|---------------|-----------------|-----------|-------------|-----------|-------------|------------|--------------|------------|--------------|------------|--------------|
| 232257_s_at | ---        | ---                  | 0                                    | ---     | -1.13         | -1.02           | 1.11      | 1.02        | -1.09     | 1.33        | -1.27      | 1.07         | -2.53      | -3.11        | -1.06      | 1.02         |
| 232261_at   | ---        | ---                  | 0                                    | ---     | -1.97         | -5.99           | 1.21      | 1.04        | 6.74      | 6.92        | 1.27       | -2.57        | -1.22      | -1.77        | 2.73       | 3.68         |
| 232264_at   | ---        | ---                  | 0                                    | ---     | -1.11         | -1.11           | 1.15      | 1.13        | 1.42      | 1.30        | -1.16      | -1.35        | -2.42      | -2.10        | -1.64      | -1.11        |
| 232273_at   | ---        | ---                  | 0                                    | ---     | -1.17         | -1.19           | -1.30     | -1.43       | -1.07     | -1.09       | 1.04       | -1.06        | -1.04      | -1.16        | -1.17      | 1.01         |
| 232331_at   | ---        | ---                  | 0                                    | ---     | -1.09         | -1.25           | 1.01      | -1.17       | -1.36     | -1.02       | 1.50       | 1.48         | 2.27       | 1.97         | 2.18       | 2.57         |
| 232338_at   | ---        | ---                  | 0                                    | ---     | -1.14         | -1.02           | 1.33      | 1.06        | 1.38      | 1.25        | -1.62      | -1.33        | -3.32      | -1.82        | -3.18      | -3.20        |
| 232344_at   | ---        | ---                  | 0                                    | ---     | -1.20         | 1.13            | 1.02      | -1.03       | 1.33      | 1.17        | -1.04      | -1.29        | -2.09      | -1.94        | -2.11      | -2.32        |
| 232347_x_at | ---        | ---                  | 0                                    | ---     | 1.19          | -1.14           | 1.07      | -1.15       | -1.38     | 1.18        | -1.04      | 1.29         | -1.35      | -1.77        | -1.89      | -1.16        |
| 232351_at   | ---        | ---                  | 0                                    | ---     | 1.38          | 1.09            | 1.11      | -1.13       | 1.18      | 1.28        | -1.23      | -1.48        | -2.10      | -1.76        | -1.98      | -2.40        |
| 232363_at   | ---        | ---                  | 0                                    | ---     | -1.76         | -1.68           | 1.47      | 1.10        | -1.23     | -1.05       | -1.27      | -1.54        | 1.09       | 1.57         | 1.14       | 1.39         |
| 232372_at   | ---        | ---                  | 0                                    | ---     | 1.57          | -1.10           | 1.06      | -1.55       | 1.60      | 1.41        | -1.09      | -1.08        | 1.65       | 1.25         | -2.01      | -2.05        |
| 232411_at   | ---        | ---                  | 0                                    | ---     | 3.85          | 3.15            | -1.51     | -1.60       | -1.32     | -1.00       | 1.64       | 1.58         | -1.17      | -1.71        | -2.45      | -2.87        |
| 232413_at   | ---        | ---                  | 0                                    | ---     | -1.11         | -1.03           | 1.18      | 1.14        | 1.05      | 1.14        | -1.20      | 1.11         | -1.37      | -1.43        | -1.10      | -1.08        |
| 232447_at   | ---        | ---                  | 0                                    | ---     | -1.02         | 1.47            | 1.09      | -1.12       | 1.10      | 1.05        | -1.00      | -1.13        | -1.56      | -1.21        | -1.16      | -1.36        |
| 232454_at   | ---        | ---                  | 0                                    | ---     | 1.25          | 1.23            | -1.03     | 1.63        | -1.05     | 1.13        | -1.02      | -1.30        | 2.76       | 2.92         | 1.08       | 1.04         |
| 232459_at   | ---        | ---                  | 0                                    | ---     | 1.03          | 1.59            | -1.00     | -1.02       | 1.25      | 1.37        | -1.19      | -1.18        | -2.05      | -2.00        | -1.63      | -1.61        |
| 232465_at   | ---        | ---                  | 0                                    | ---     | 1.05          | 1.06            | 1.00      | -1.06       | 1.19      | 1.33        | -1.03      | -1.14        | -2.02      | -1.95        | -1.84      | -2.17        |
| 232471_at   | ---        | ---                  | 0                                    | ---     | 1.57          | 1.49            | 1.21      | 1.32        | 1.27      | 1.31        | 1.32       | 1.09         | -3.04      | -4.75        | -1.54      | -2.38        |
| 232493_at   | ---        | ---                  | 0                                    | ---     | 1.12          | -1.01           | 1.01      | -1.26       | 1.18      | 1.07        | -1.35      | -1.17        | -1.50      | -1.51        | -1.79      | -2.01        |
| 232501_at   | ---        | ---                  | 0                                    | ---     | 1.22          | 1.15            | 1.28      | 1.11        | -1.00     | 1.08        | -1.09      | -1.01        | -2.17      | -1.80        | -1.70      | -1.68        |
| 232503_at   | ---        | ---                  | 0                                    | ---     | -1.08         | -1.03           | 1.05      | -1.05       | -1.24     | -1.28       | -1.18      | -1.01        | -1.01      | 1.07         | 1.94       | 1.69         |
| 232511_at   | ---        | ---                  | 0                                    | ---     | -1.04         | -1.15           | -1.15     | -1.23       | 1.10      | 1.06        | -1.02      | 1.12         | -2.20      | -1.48        | -2.02      | -1.98        |
| 232528_at   | ---        | ---                  | 0                                    | ---     | 1.16          | 1.04            | -1.36     | -1.08       | 1.28      | -1.23       | -1.28      | -1.30        | -2.22      | -1.67        | -1.31      | -2.74        |
| 232540_x_at | ---        | ---                  | 0                                    | ---     | 1.14          | 1.24            | 1.37      | 1.08        | -1.28     | -1.05       | 1.02       | -1.15        | -1.91      | -1.66        | -1.11      | 1.16         |
| 232565_at   | ---        | ---                  | 0                                    | ---     | 1.74          | 1.26            | -1.07     | 1.08        | 1.32      | 1.24        | -1.10      | -1.18        | -1.48      | -1.46        | -2.27      | -2.06        |
| 232569_at   | ---        | ---                  | 0                                    | ---     | 1.02          | 1.00            | 1.07      | -1.02       | 1.15      | -1.03       | 1.19       | 1.21         | -3.43      | -3.81        | -4.28      | -3.54        |
| 232576_at   | ---        | ---                  | 0                                    | ---     | -1.24         | -1.04           | -1.16     | -1.04       | -1.57     | 1.13        | 1.41       | 1.17         | 1.04       | -1.16        | 1.27       | 1.12         |
| 232582_at   | ---        | ---                  | 0                                    | ---     | 1.71          | 2.52            | 1.66      | 1.35        | -2.46     | -3.80       | -1.70      | -2.07        | 8.50       | 3.40         | 5.94       | 6.57         |
| 232584_at   | ---        | ---                  | 0                                    | ---     | 1.13          | -1.02           | 1.17      | 1.01        | 1.57      | 1.10        | -1.02      | -1.07        | -2.62      | -1.81        | -1.94      | -1.73        |
| 232601_at   | ---        | ---                  | 0                                    | ---     | -1.08         | -1.56           | -1.17     | -1.11       | 1.48      | 1.14        | -1.21      | -1.05        | -1.77      | -1.60        | -1.16      | -1.25        |
| 232614_at   | ---        | ---                  | 0                                    | ---     | 1.17          | 2.13            | 1.38      | 1.02        | 1.94      | 1.54        | 2.58       | 2.25         | -2.25      | -1.49        | -1.06      | -1.10        |
| 232615_at   | ---        | ---                  | 0                                    | ---     | -1.07         | -1.20           | 1.17      | 1.10        | 1.19      | 1.34        | 1.12       | -1.10        | -2.01      | -1.63        | -2.28      | -2.22        |
| 232653_at   | ---        | ---                  | 0                                    | ---     | 1.57          | 1.34            | 1.14      | 1.01        | 1.13      | -1.01       | -1.12      | -1.19        | -1.57      | -2.03        | -1.77      | -2.16        |
| 232659_at   | ---        | ---                  | 0                                    | ---     | 2.23          | 1.79            | 1.20      | 1.29        | 1.14      | 1.08        | -1.28      | -1.15        | -4.22      | -3.34        | -2.72      | -5.49        |
| 232665_x_at | ---        | ---                  | 0                                    | ---     | -1.06         | 1.02            | -1.14     | -1.59       | 1.23      | 1.07        | 1.07       | 1.36         | -1.54      | -1.07        | -1.51      | -2.38        |
| 232670_at   | ---        | ---                  | 0                                    | ---     | -1.26         | -1.13           | 1.04      | 1.05        | 1.05      | 1.14        | -1.19      | 1.04         | -1.83      | -1.51        | -1.29      | -1.77        |
| 232681_at   | ---        | ---                  | 0                                    | ---     | -1.42         | -1.51           | -1.04     | -1.06       | -1.53     | -1.35       | 1.68       | 1.56         | -1.16      | -1.00        | 2.21       | 2.27         |
| 232687_at   | ---        | ---                  | 0                                    | ---     | -1.29         | 1.08            | -1.25     | -1.63       | -1.73     | -1.74       | -1.54      | 1.10         | -2.04      | -1.73        | -2.55      | -2.85        |
| 232709_at   | ---        | ---                  | 0                                    | ---     | 1.32          | 1.25            | -1.22     | -1.50       | -1.31     | -1.21       | -2.34      | -1.34        | -1.70      | -2.34        | -4.07      | -3.43        |
| 232712_at   | ---        | ---                  | 0                                    | ---     | -1.01         | -1.19           | 1.13      | 1.50        | 1.26      | -1.24       | 1.15       | 1.10         | -1.78      | -2.09        | -2.32      | -2.90        |
| 232758_s_at | ---        | ---                  | 0                                    | ---     | 1.18          | -1.14           | 1.06      | -1.13       | 1.24      | 1.20        | -1.57      | 1.03         | -1.91      | -2.04        | -1.96      | -1.81        |
| 232769_at   | ---        | ---                  | 0                                    | ---     | -1.77         | -1.23           | 1.74      | -1.14       | 1.26      | 1.34        | 1.33       | 1.61         | 1.57       | -1.56        | -3.30      | -5.07        |
| 232778_at   | ---        | ---                  | 0                                    | ---     | 1.48          | 1.19            | -1.17     | -1.07       | -1.01     | 1.00        | -1.00      | 1.61         | -1.67      | -2.33        | -1.74      | -2.42        |
| 232783_at   | ---        | ---                  | 0                                    | ---     | 1.06          | -1.45           | 1.13      | -1.10       | 1.43      | 1.11        | -1.42      | -1.11        | -4.00      | -2.43        | -2.70      | -3.54        |
| 232795_at   | ---        | ---                  | 0                                    | ---     | 1.36          | 1.40            | 1.06      | 1.11        | -1.05     | 1.13        | -1.41      | -1.10        | -1.20      | -1.60        | 1.33       | 1.50         |
| 232799_at   | ---        | ---                  | 0                                    | ---     | 1.03          | 2.48            | -2.98     | -3.78       | -11.93    | 1.30        | -1.64      | -1.08        | 5.76       | 7.67         | 2.53       | 1.97         |
| 232803_at   | ---        | ---                  | 0                                    | ---     | 1.36          | 1.26            | 1.34      | -1.08       | -1.12     | 1.14        | -1.15      | -1.11        | -1.48      | -1.34        | -1.14      | -1.31        |
| 232808_at   | ---        | ---                  | 0                                    | ---     | 1.04          | 1.05            | 1.08      | 1.05        | 1.05      | 1.06        | 1.18       | 1.18         | -2.21      | -2.36        | -2.07      | -2.21        |
| 232823_at   | ---        | ---                  | 0                                    | ---     | -2.58         | 1.82            | -1.35     | 1.06        | 1.23      | -1.48       | 1.50       | 1.30         | 1.46       | 2.26         | -2.22      | 1.96         |
| 232827_at   | ---        | ---                  | 0                                    | ---     | -1.18         | -1.14           | 1.11      | 1.01        | -1.04     | -1.02       | -1.11      | -1.24        | 2.00       | 1.40         | 1.20       | -1.13        |
| 232834_at   | ---        | ---                  | 0                                    | ---     | -1.42         | -1.62           | -1.09     | -1.17       | 1.15      | 1.23        | -1.09      | -1.39        | -1.64      | -2.44        | -1.88      | -2.18        |
| 232855_at   | ---        | ---                  | 0                                    | ---     | 1.72          | -1.99           | 2.02      | 1.69        | 1.12      | 1.44        | -1.85      | 2.47         | 6.51       | 1.23         | 1.05       | 1.55         |
| 232871_at   | ---        | ---                  | 0                                    | ---     | 2.90          | 2.03            | -1.45     | 2.84        | 2.41      | 1.98        | 1.31       | 1.17         | 2.10       | -1.71        | 2.04       | -1.20        |
| 232880_at   | ---        | ---                  | 0                                    | ---     | 1.12          | 1.28            | 1.22      | -1.02       | -1.17     | -1.12       | -3.91      | -1.71        | 15.41      | 8.65         | -1.53      | 1.21         |
| 232906_at   | ---        | ---                  | 0                                    | ---     | 2.46          | 1.74            | 1.17      | 1.19        | 1.10      | -1.12       | -1.15      | -1.32        | 1.04       | -1.40        | -2.55      | -2.59        |
| 232916_at   | ---        | ---                  | 0                                    | ---     | 1.84          | 2.01            | -1.18     | -1.62       | -1.01     | 1.60        | 1.54       | -1.27        | -1.30      | -1.29        | -1.43      | -2.22        |
| 232923_at   | ---        | ---                  | 0                                    | ---     | 1.68          | 1.99            | -1.20     | -1.32       | 1.04      | 1.10        | 1.37       | -1.09        | -1.10      | -1.50        | -3.70      | -1.50        |
| 232929_at   | ---        | ---                  | 0                                    | ---     | 1.05          | -1.25           | 1.04      | -1.14       | -1.06     | 1.18        | -1.27      | -1.59        | -2.45      | -4.47        | -1.76      | -2.97        |
| 232962_x_at | ---        | ---                  | 0                                    | ---     | -1.04         | -1.19           | -1.19     | -1.17       | 1.35      | 1.21        | -1.24      | -1.21        | -2.35      | -1.91        | -2.37      | -1.79        |
| 232963_at   | ---        | ---                  | 0                                    | ---     | 1.19          | 1.18            | -1.29     | -1.26       | 1.02      | 1.19        | -1.16      | -1.10        | -1.42      | -1.63        | -2.71      | -2.09        |
| 232974_at   | ---        | ---                  | 0                                    | ---     | 1.03          | -1.14           | 1.05      | -1.31       | -1.24     | -1.09       | 1.63       | 1.26         | -2.00      | -2.03        | -2.06      | -2.91        |
| 232978_at   | ---        | ---                  | 0                                    | ---     | 1.26          | -1.05           | -1.07     | 1.04        | -1.02     | 1.43        | -1.23      | -1.45        | -1.72      | -1.23        | -1.73      | -1.60        |
| 232991_at   | ---        | ---                  | 0                                    | ---     | 1.40          | 1.15            | -1.01     | -1.20       | 1.05      | -1.06       | -1.15      | -1.00        | -2.90      | -1.67        | -1.80      | -1.37        |
| 232995_at   | ---        | ---                  | 0                                    | ---     | 1.18          | 1.17            | -1.15     | -1.71       | -1.53     | 1.11        | 1.02       | -1.28        | 1.37       | -1.35        | -1.32      | -2.17        |
| 232997_at   | ---        | ---                  | 0                                    | ---     | 1.22          | -1.03           | 1.14      | 1.00        | 1.03      | 1.28        | 1.03       | 1.00         | -1.97      | -2.08        | -2.64      | -3.37        |
| 233010_at   | ---        | ---                  | 0                                    | ---     | 1.38          | 1.35            | -1.06     | 1.16        | -1.09     | -1.04       | -1.03      | 1.20         | -1.45      | -1.97        | -3.02      | -1.36        |

| ID          | Gene Title | Chromosomal Location | 1st Gene Ontology Biological Process | Pathway | A2497 30 mins | A2497P' 30 mins | A2497 2 h | A2497P' 2 h | A2497 4 h | A2497P' 4 h | A2497 24 h | A2497P' 24 h | A2497 48 h | A2497P' 48 h | A2497 72 h | A2497P' 72 h |
|-------------|------------|----------------------|--------------------------------------|---------|---------------|-----------------|-----------|-------------|-----------|-------------|------------|--------------|------------|--------------|------------|--------------|
| 233014_at   | ---        | ---                  | 0                                    | ---     | -1.05         | -1.05           | 1.11      | 1.21        | 1.14      | 1.29        | 1.24       | -1.15        | -1.88      | -1.64        | -2.97      | -1.58        |
| 233017_x_at | ---        | ---                  | 0                                    | ---     | -1.13         | -1.06           | 1.08      | -1.13       | 1.08      | 1.02        | -1.21      | -1.24        | -2.98      | -2.60        | -4.87      | -4.05        |
| 233035_at   | ---        | ---                  | 0                                    | ---     | 1.87          | 1.58            | -1.28     | -1.84       | -1.24     | 1.19        | 1.05       | -1.04        | -2.56      | -1.84        | -2.34      | -2.68        |
| 233037_at   | ---        | ---                  | 0                                    | ---     | 1.22          | 1.11            | -1.07     | -1.21       | 1.09      | 1.05        | -1.21      | -1.18        | -1.83      | -1.76        | -2.18      | -1.79        |
| 233068_at   | ---        | ---                  | 0                                    | ---     | -1.18         | -1.01           | 1.12      | 1.24        | 1.08      | 1.20        | -1.13      | -1.00        | -1.84      | -1.54        | -1.90      | -2.15        |
| 233094_at   | ---        | ---                  | 0                                    | ---     | 2.21          | 1.15            | -1.37     | -7.31       | 1.45      | -1.35       | 1.77       | -2.51        | 4.53       | 5.77         | 1.42       | 1.91         |
| 233115_at   | ---        | ---                  | 0                                    | ---     | 1.18          | -1.40           | 1.09      | 1.06        | 1.02      | 1.25        | -1.75      | -1.55        | 1.04       | 1.02         | 2.28       | 2.40         |
| 233118_at   | ---        | ---                  | 0                                    | ---     | -3.71         | 1.49            | -1.35     | 1.16        | -1.85     | 1.63        | 2.02       | 1.60         | 1.44       | -1.37        | -1.86      | -1.03        |
| 233152_x_at | ---        | ---                  | 0                                    | ---     | -1.16         | -1.10           | 1.32      | 1.12        | 1.29      | 1.21        | 1.63       | 1.55         | -1.05      | -1.59        | -3.24      | -1.83        |
| 233161_at   | ---        | ---                  | 0                                    | ---     | -1.15         | 1.17            | 1.16      | 1.31        | -1.39     | -1.05       | -1.22      | 1.11         | -1.86      | -1.45        | -1.77      | -2.19        |
| 233163_at   | ---        | ---                  | 0                                    | ---     | -1.36         | -1.29           | -1.52     | 1.53        | -1.94     | -1.02       | 8.50       | 3.36         | -1.12      | -1.54        | 1.57       | -1.27        |
| 233181_at   | ---        | ---                  | 0                                    | ---     | -1.79         | -1.93           | -1.47     | -1.20       | 1.95      | 1.75        | -1.02      | -1.07        | -4.53      | -2.15        | -2.59      | -7.56        |
| 233185_at   | ---        | ---                  | 0                                    | ---     | 1.07          | -1.02           | 1.17      | -1.00       | -1.08     | -1.20       | -1.40      | -1.11        | -1.09      | 1.01         | -1.14      | -1.19        |
| 233187_s_at | ---        | ---                  | 0                                    | ---     | 1.98          | 1.98            | -1.16     | 1.40        | 1.00      | -1.11       | -1.02      | 1.59         | 1.54       | 1.51         | -1.42      | -1.51        |
| 233201_at   | ---        | ---                  | 0                                    | ---     | -1.18         | -1.47           | 1.57      | 2.17        | -1.26     | 1.18        | -1.19      | 1.27         | 3.12       | 1.51         | -1.08      | 1.06         |
| 233205_at   | ---        | ---                  | 0                                    | ---     | 1.18          | 1.09            | 1.12      | -1.23       | -1.22     | -1.38       | 1.03       | 1.07         | -1.43      | -1.49        | -2.04      | -2.20        |
| 233212_at   | ---        | ---                  | 0                                    | ---     | -1.02         | 1.07            | 1.01      | -1.22       | 1.87      | 1.24        | 1.83       | 1.58         | -3.21      | -2.31        | -2.82      | -2.25        |
| 233214_at   | ---        | ---                  | 0                                    | ---     | -1.07         | -1.08           | 1.06      | -1.01       | 1.18      | 1.12        | 1.14       | 1.06         | -1.41      | -1.69        | -1.70      | -1.36        |
| 233225_at   | ---        | ---                  | 0                                    | ---     | -1.24         | 1.17            | 1.46      | -1.05       | 1.12      | 1.16        | 1.06       | -1.20        | -3.75      | -4.45        | -2.30      | -2.08        |
| 233228_at   | ---        | ---                  | 0                                    | ---     | 1.62          | 1.56            | 1.15      | 1.00        | 1.25      | 1.32        | -1.14      | 1.01         | -4.04      | -3.16        | -3.74      | -4.16        |
| 233239_at   | ---        | ---                  | 0                                    | ---     | 1.37          | 1.24            | 1.17      | 1.47        | 2.82      | 3.65        | 1.79       | 1.57         | 1.64       | 1.91         | -1.53      | 1.93         |
| 233243_at   | ---        | ---                  | 0                                    | ---     | 1.04          | -1.36           | -1.05     | -1.20       | 2.55      | 2.21        | 1.12       | -1.50        | -1.95      | -1.90        | -1.36      | -1.06        |
| 233246_at   | ---        | ---                  | iron-sulfur cluster assembly         | ---     | 1.86          | 1.18            | 1.19      | -1.05       | -1.29     | -1.00       | -1.02      | 1.33         | -2.65      | -1.84        | -1.78      | -1.37        |
| 233253_at   | ---        | ---                  |                                      | ---     | -1.30         | 1.17            | 1.00      | -1.01       | -1.01     | -1.05       | 1.18       | -1.36        | -2.19      | -2.57        | -3.04      | -2.15        |
| 233258_at   | ---        | ---                  | 0                                    | ---     | 2.91          | 1.18            | 1.51      | 2.32        | -1.14     | 2.44        | -2.06      | -4.36        | 8.03       | 3.47         | -1.22      | 2.50         |
| 233263_at   | ---        | ---                  | 0                                    | ---     | 1.17          | 1.19            | 1.62      | 2.03        | 1.19      | 1.50        | -1.28      | 1.35         | -2.21      | 4.37         | -2.42      | -1.32        |
| 233264_at   | ---        | ---                  | 0                                    | ---     | -1.04         | -1.08           | 1.06      | 1.04        | -1.11     | 1.30        | 1.24       | -1.16        | -2.23      | -1.94        | -3.63      | -3.16        |
| 233267_at   | ---        | ---                  | 0                                    | ---     | -1.08         | -1.18           | -1.13     | -1.09       | -1.19     | -1.13       | -1.04      | 1.08         | -1.20      | 1.03         | -2.01      | -1.58        |
| 233271_at   | ---        | ---                  | 0                                    | ---     | 1.20          | -1.37           | -1.12     | 1.22        | -1.19     | 1.11        | -1.27      | -1.25        | -1.94      | -1.67        | -1.69      | -1.58        |
| 233273_at   | ---        | ---                  | 0                                    | ---     | 1.47          | 1.30            | 1.18      | 1.54        | -1.13     | 1.20        | 1.22       | 1.54         | -2.84      | -3.53        | -3.01      | -3.92        |
| 233274_at   | ---        | ---                  | 0                                    | ---     | 1.31          | 1.08            | -1.15     | 1.16        | 1.17      | 1.18        | -1.23      | -1.59        | -1.47      | -1.32        | -1.75      | -1.74        |
| 233275_at   | ---        | ---                  | 0                                    | ---     | -1.50         | -2.60           | 1.12      | 1.45        | -2.06     | -1.79       | 1.26       | 6.55         | 1.25       | 2.28         | -1.40      | -1.59        |
| 233279_at   | ---        | ---                  | 0                                    | ---     | -1.20         | -1.08           | -1.33     | -1.03       | 1.72      | 1.44        | 1.63       | -2.16        | -2.13      | -2.13        | -2.18      | -2.18        |
| 233290_at   | ---        | ---                  | 0                                    | ---     | 1.08          | -1.20           | 1.18      | -1.23       | 1.22      | 1.25        | -1.06      | 1.11         | -1.47      | -1.41        | -1.96      | -1.59        |
| 233296_x_at | ---        | ---                  | 0                                    | ---     | 1.46          | 1.29            | 1.07      | -1.23       | -1.03     | 1.06        | -1.38      | -1.20        | -1.89      | -1.64        | -2.65      | -3.03        |
| 233303_at   | ---        | ---                  | 0                                    | ---     | 1.43          | 1.16            | -1.01     | -1.13       | -1.07     | -1.10       | -1.02      | -1.20        | -2.33      | -1.04        | -1.85      | -1.45        |
| 233313_at   | ---        | ---                  | 0                                    | ---     | 1.30          | 1.04            | 1.10      | 1.08        | 1.20      | 1.29        | -1.11      | 1.05         | -1.42      | -1.08        | -2.12      | -1.88        |
| 233315_at   | ---        | ---                  | 0                                    | ---     | -1.73         | 1.02            | -1.11     | -1.28       | 1.10      | 1.02        | 1.22       | -1.22        | -1.55      | -1.11        | -1.62      | -1.03        |
| 233319_x_at | ---        | ---                  | 0                                    | ---     | 1.28          | 1.06            | -1.71     | -1.84       | -1.10     | -1.09       | 1.06       | 1.14         | -1.25      | -1.10        | -1.43      | -1.03        |
| 233323_at   | ---        | ---                  | 0                                    | ---     | 1.40          | 1.29            | -1.60     | -2.23       | 1.28      | 1.27        | -1.06      | -1.26        | -2.95      | -2.98        | -4.97      | -1.35        |
| 233346_at   | ---        | ---                  | 0                                    | ---     | -2.99         | -1.61           | 1.22      | 1.39        | 4.15      | 2.12        | 2.57       | 1.06         | -1.55      | -1.19        | 2.83       | 1.22         |
| 233348_at   | ---        | ---                  | 0                                    | ---     | 1.12          | 1.25            | 1.40      | 1.23        | -1.46     | -1.24       | -1.01      | -1.32        | -2.06      | -3.69        | -1.78      | -1.72        |
| 233359_at   | ---        | ---                  | 0                                    | ---     | 1.48          | 1.38            | -1.94     | -1.70       | -7.23     | -1.68       | -2.13      | 1.02         | 2.03       | 1.46         | -1.64      | -3.46        |
| 233364_s_at | ---        | ---                  | 0                                    | ---     | 2.89          | 1.97            | -1.05     | 1.54        | 1.42      | 1.39        | 1.57       | 1.43         | -2.83      | -2.30        | -3.19      | -1.25        |
| 233372_at   | ---        | ---                  | 0                                    | ---     | 1.50          | 1.29            | -1.10     | -1.54       | -1.25     | 1.08        | 1.45       | 1.08         | -2.83      | -3.16        | -2.95      | -2.08        |
| 233376_at   | ---        | ---                  | 0                                    | ---     | -1.11         | 1.23            | 1.23      | -1.24       | -1.62     | -1.64       | -5.79      | -2.27        | 1.23       | -1.18        | 1.54       | 1.51         |
| 233388_at   | ---        | ---                  | 0                                    | ---     | -1.22         | -1.01           | -1.09     | 1.02        | 1.25      | 1.08        | -1.00      | -1.11        | 1.02       | 1.23         | -1.17      | 1.58         |
| 233413_at   | ---        | ---                  | 0                                    | ---     | -1.17         | 1.01            | 1.01      | 1.05        | 1.39      | 1.50        | -1.45      | -1.40        | -4.85      | -4.20        | -5.14      | -4.86        |
| 233415_at   | ---        | ---                  | 0                                    | ---     | -1.24         | -1.04           | -1.02     | -1.13       | -1.02     | -1.07       | 1.59       | 1.87         | 1.21       | -1.48        | -1.11      | -2.61        |
| 233417_at   | ---        | ---                  | 0                                    | ---     | 1.16          | -1.51           | 1.26      | -1.21       | 1.01      | -1.13       | -1.61      | -1.49        | -2.93      | -1.53        | -2.67      | -2.36        |
| 233427_x_at | ---        | ---                  | 0                                    | ---     | 1.24          | 1.25            | -1.12     | 1.02        | 1.19      | -1.00       | 1.11       | 1.43         | -1.09      | -1.17        | -1.67      | -1.68        |
| 233431_x_at | ---        | ---                  | 0                                    | ---     | -1.05         | 1.27            | -1.00     | -1.10       | 1.37      | 1.32        | 1.28       | 1.17         | -2.22      | -2.00        | -2.21      | -2.10        |
| 233435_at   | ---        | ---                  | 0                                    | ---     | -1.03         | 1.20            | -1.60     | -2.61       | -1.29     | -2.18       | -1.36      | 1.40         | -2.07      | -1.25        | -2.06      | -2.05        |
| 233448_s_at | ---        | ---                  | 0                                    | ---     | -1.04         | -1.28           | -1.08     | -1.31       | 1.17      | 1.42        | -1.84      | -1.86        | -4.19      | -3.11        | -3.96      | -2.06        |
| 233450_at   | ---        | ---                  | 0                                    | ---     | -1.27         | -1.13           | 1.03      | -2.52       | 1.50      | 1.37        | 1.80       | 1.19         | 1.02       | -1.30        | -3.42      | -2.18        |
| 233452_at   | ---        | ---                  | 0                                    | ---     | 1.20          | 1.31            | 1.09      | -1.23       | -1.04     | -1.04       | 3.80       | 2.21         | 2.06       | 1.90         | -1.29      | -1.71        |
| 233455_at   | ---        | ---                  | 0                                    | ---     | 1.11          | -1.09           | -1.05     | -1.55       | 1.03      | -1.13       | -1.33      | -1.05        | -9.44      | -7.34        | -8.39      | -2.74        |
| 233478_at   | ---        | ---                  | 0                                    | ---     | -2.10         | -1.19           | -3.26     | -1.45       | -1.39     | -2.43       | -1.15      | 1.34         | -1.06      | -1.36        | 2.44       | 1.50         |
| 233505_at   | ---        | ---                  | 0                                    | ---     | 2.86          | 4.33            | 1.28      | -3.05       | -1.07     | -1.62       | 1.87       | -1.12        | 2.75       | 7.22         | -2.83      | -7.72        |
| 233518_at   | ---        | ---                  | 0                                    | ---     | -1.05         | 1.11            | 1.06      | -1.07       | 1.37      | 1.41        | 1.21       | 1.33         | -2.04      | -1.88        | -1.47      | -1.40        |
| 233521_at   | ---        | ---                  | 0                                    | ---     | -1.01         | -2.55           | -1.94     | 1.41        | 2.52      | 5.89        | -1.04      | 1.42         | 2.95       | 3.00         | -1.20      | 3.44         |
| 233554_at   | ---        | ---                  | 0                                    | ---     | 1.19          | -1.39           | 1.25      | 1.14        | 1.22      | 1.09        | 1.31       | 1.03         | -1.96      | -2.55        | -1.71      | -1.55        |
| 233596_at   | ---        | ---                  | 0                                    | ---     | 1.62          | 1.51            | 1.03      | 1.26        | -1.10     | 1.49        | 1.08       | 1.42         | -1.60      | -1.95        | -1.99      | -1.64        |
| 233607_at   | ---        | ---                  | 0                                    | ---     | 1.51          | 1.22            | 1.19      | -1.30       | 1.26      | 1.23        | 1.25       | 1.46         | -2.52      | -2.16        | -2.33      | -1.97        |
| 233648_at   | ---        | ---                  | 0                                    | ---     | -1.15         | -1.39           | -1.03     | -1.11       | 1.05      | 1.08        | 1.91       | 1.11         | -1.70      | -2.85        | -1.96      | -2.36        |
| 233658_at   | ---        | ---                  | 0                                    | ---     | 2.68          | 2.76            | 1.09      | 1.44        | -1.02     | 1.09        | -1.15      | -1.76        | -1.53      | -1.56        | -1.78      | -1.32        |

| ID          | Gene Title | Chromosomal Location | 1st Gene Ontology Biological Process | Pathway | A2497 30 mins | A2497P' 30 mins | A2497 2 h | A2497P' 2 h | A2497 4 h | A2497P' 4 h | A2497 24 h | A2497P' 24 h | A2497 48 h | A2497P' 48 h | A2497 72 h | A2497P' 72 h |
|-------------|------------|----------------------|--------------------------------------|---------|---------------|-----------------|-----------|-------------|-----------|-------------|------------|--------------|------------|--------------|------------|--------------|
| 233664_at   | ---        | ---                  | 0                                    | ---     | 1.55          | -1.08           | 1.18      | 1.31        | -1.05     | 1.04        | 1.35       | 1.33         | -1.62      | -1.80        | -2.22      | -3.76        |
| 233668_at   | ---        | ---                  | 0                                    | ---     | 6.57          | 2.02            | -1.54     | -6.16       | 1.05      | 1.35        | 2.29       | -1.17        | -1.90      | -1.66        | 2.59       | 1.14         |
| 233672_s_at | ---        | ---                  | 0                                    | ---     | -1.64         | -1.43           | -1.28     | -5.20       | -5.72     | -1.60       | 9.49       | 1.28         | 3.37       | -1.29        | 12.64      | 6.49         |
| 233678_at   | ---        | ---                  | 0                                    | ---     | 1.71          | 1.64            | 1.22      | -1.18       | 1.27      | 1.50        | 1.02       | 1.15         | -2.46      | -1.83        | -3.25      | -2.88        |
| 233682_at   | ---        | ---                  | 0                                    | ---     | 3.87          | 3.86            | 2.03      | 8.31        | -2.13     | -2.48       | -1.48      | 1.17         | 1.77       | 3.38         | 7.03       | 16.77        |
| 233684_at   | ---        | ---                  | 0                                    | ---     | -1.86         | -6.04           | 3.66      | 2.10        | -1.55     | -1.96       | -2.08      | -1.71        | 1.09       | 1.24         | -1.43      | 1.04         |
| 233689_at   | ---        | ---                  | 0                                    | ---     | 1.06          | -1.31           | 1.44      | 1.07        | 1.07      | -1.15       | 1.32       | 1.09         | -2.06      | -1.91        | -3.37      | -1.84        |
| 233713_at   | ---        | ---                  | 0                                    | ---     | 1.29          | 1.12            | 1.45      | -1.10       | 1.10      | 1.20        | -1.37      | -1.44        | -1.26      | 1.06         | -2.69      | -2.49        |
| 233723_at   | ---        | ---                  | 0                                    | ---     | 1.65          | 2.07            | -1.69     | 4.10        | 1.38      | 3.01        | -8.92      | -2.02        | 1.53       | -1.15        | -2.30      | 1.46         |
| 233729_at   | ---        | ---                  | 0                                    | ---     | 1.01          | -1.12           | -1.04     | -1.14       | -1.10     | -1.05       | -1.21      | -1.11        | -1.03      | -1.54        | 1.22       | -1.06        |
| 233738_at   | ---        | ---                  | 0                                    | ---     | 3.81          | -1.27           | -2.33     | -3.81       | 1.04      | -1.17       | -1.17      | -1.17        | -4.51      | -1.91        | -1.98      | -1.10        |
| 233744_at   | ---        | ---                  | 0                                    | ---     | 1.23          | -1.26           | 1.14      | 1.08        | 1.13      | 1.11        | 1.19       | -1.19        | -3.02      | -1.76        | -1.69      | -1.37        |
| 233757_x_at | ---        | ---                  | 0                                    | ---     | -1.10         | -1.02           | -1.32     | -1.49       | -1.05     | 1.15        | -1.31      | -1.21        | -1.75      | -1.13        | -1.48      | -1.64        |
| 233765_at   | ---        | ---                  | 0                                    | ---     | 2.29          | -1.05           | -1.47     | -1.53       | -1.44     | -1.00       | -1.12      | 1.50         | -2.05      | -3.16        | -1.78      | -1.42        |
| 233771_at   | ---        | ---                  | 0                                    | ---     | -1.01         | -1.02           | 1.03      | 1.02        | 1.28      | 1.31        | 1.19       | 1.03         | -1.60      | -2.24        | -1.59      | -1.58        |
| 233779_x_at | ---        | ---                  | 0                                    | ---     | 1.10          | -1.04           | -1.21     | -1.26       | 1.11      | 1.05        | -1.14      | 1.17         | 1.02       | 1.02         | -1.57      | -1.78        |
| 233788_at   | ---        | ---                  | 0                                    | ---     | 2.50          | 2.98            | 2.35      | 2.21        | -1.02     | 1.03        | 2.89       | 1.87         | 2.03       | 4.06         | 1.64       | 1.29         |
| 233791_at   | ---        | ---                  | 0                                    | ---     | 1.65          | 1.26            | -1.92     | 1.45        | 3.38      | -1.80       | -1.75      | 1.16         | 1.70       | 1.11         | -1.04      | -1.11        |
| 233800_at   | ---        | ---                  | 0                                    | ---     | 1.42          | 1.18            | -1.02     | -1.51       | -1.02     | -1.31       | 1.01       | -1.04        | -1.33      | -2.09        | -2.72      | -2.98        |
| 233806_at   | ---        | ---                  | 0                                    | ---     | 2.14          | 1.25            | 1.21      | 1.97        | -11.14    | -1.09       | 1.12       | -4.61        | 1.13       | 1.07         | -1.24      | -1.42        |
| 233807_at   | ---        | ---                  | 0                                    | ---     | -1.06         | -1.07           | -1.06     | 1.10        | 1.24      | 1.05        | 1.08       | 1.16         | -1.76      | -1.53        | -2.03      | -1.63        |
| 233816_at   | ---        | ---                  | 0                                    | ---     | -1.12         | 1.06            | -1.89     | 1.13        | 1.40      | 1.05        | 3.49       | 1.60         | 1.88       | 1.58         | 1.40       | 1.03         |
| 233834_at   | ---        | ---                  | 0                                    | ---     | 1.52          | 2.00            | 1.48      | -1.43       | -1.07     | -1.19       | -1.59      | -1.83        | -5.45      | -4.62        | -3.64      | -11.44       |
| 233867_at   | ---        | ---                  | 0                                    | ---     | 2.21          | 1.24            | 1.48      | -1.34       | -1.27     | 1.17        | -1.82      | -1.25        | -1.36      | -1.88        | -3.18      | -4.64        |
| 233877_at   | ---        | ---                  | 0                                    | ---     | 1.21          | 1.12            | -1.14     | -1.09       | -1.20     | 1.21        | 1.01       | -1.28        | -2.56      | -2.36        | -1.40      | -1.82        |
| 233908_x_at | ---        | ---                  | 0                                    | ---     | -1.31         | 1.32            | 1.37      | 1.17        | 1.02      | 1.12        | -1.35      | 1.22         | -1.76      | -2.93        | -1.84      | -1.93        |
| 233976_at   | ---        | ---                  | 0                                    | ---     | 1.41          | 1.05            | 1.31      | 1.25        | -1.13     | 1.08        | -1.50      | -1.05        | -2.73      | -1.69        | -4.42      | -2.35        |
| 233991_at   | ---        | ---                  | 0                                    | ---     | -3.52         | -1.70           | 2.32      | 1.02        | 1.65      | 1.14        | 2.49       | 1.18         | -2.34      | 2.03         | -1.82      | 1.54         |
| 233995_at   | ---        | ---                  | 0                                    | ---     | 1.43          | 1.16            | 1.09      | -1.07       | 1.13      | 1.02        | 1.40       | -1.09        | -2.98      | -2.54        | -2.48      | -2.10        |
| 234011_at   | ---        | ---                  | 0                                    | ---     | 1.66          | -1.17           | -1.29     | -2.56       | -1.38     | -1.39       | -2.44      | -1.13        | -1.27      | -2.08        | -1.39      | -2.66        |
| 234025_at   | ---        | ---                  | 0                                    | ---     | 1.49          | -1.17           | -1.12     | -1.21       | 1.41      | 1.37        | -6.09      | -1.05        | 2.23       | 1.05         | 1.69       | 2.58         |
| 234028_at   | ---        | ---                  | 0                                    | ---     | -1.55         | -1.15           | 1.43      | -1.12       | -1.19     | 1.84        | -1.63      | -2.41        | -3.49      | -1.94        | -6.03      | -1.97        |
| 234032_at   | ---        | ---                  | 0                                    | ---     | 7.91          | 7.71            | 1.52      | 1.60        | 1.37      | 1.33        | -1.27      | 1.07         | -1.47      | -1.84        | -1.69      | -1.93        |
| 234034_at   | ---        | ---                  | 0                                    | ---     | 1.83          | 1.52            | -1.09     | -1.18       | 1.89      | 1.13        | -2.59      | -1.23        | -4.79      | -2.60        | 4.34       | 1.22         |
| 234038_at   | ---        | ---                  | 0                                    | ---     | 1.76          | -1.17           | -1.84     | -5.16       | -1.24     | -1.54       | 2.11       | 1.60         | 6.10       | -1.39        | -3.70      | -5.77        |
| 234044_at   | ---        | ---                  | 0                                    | ---     | 1.29          | -2.29           | 3.18      | 1.85        | 4.43      | -2.19       | -2.11      | -2.45        | -1.17      | -5.04        | -1.06      | -1.50        |
| 234046_at   | ---        | ---                  | 0                                    | ---     | -1.07         | -1.05           | -1.05     | -1.31       | -1.03     | 1.23        | -1.18      | -1.17        | -1.02      | -1.31        | -1.88      | -1.75        |
| 234057_at   | ---        | ---                  | 0                                    | ---     | -1.14         | -1.22           | -1.02     | 1.01        | -1.00     | -1.01       | 1.14       | 1.04         | -2.89      | -2.06        | -2.16      | -2.03        |
| 234069_at   | ---        | ---                  | 0                                    | ---     | -2.06         | -1.45           | 12.80     | 9.17        | -1.16     | 2.37        | 3.83       | 3.59         | 1.05       | -1.65        | 4.55       | 2.09         |
| 234074_at   | ---        | ---                  | 0                                    | ---     | -1.22         | 1.02            | 1.05      | 1.00        | 1.16      | 1.14        | -1.01      | -1.08        | -2.62      | -4.10        | -3.56      | -2.62        |
| 234111_at   | ---        | ---                  | 0                                    | ---     | -1.12         | -1.02           | 1.12      | -1.05       | 1.13      | 1.15        | -1.54      | -1.33        | -1.57      | -1.96        | -1.37      | -1.79        |
| 234124_at   | ---        | ---                  | 0                                    | ---     | -1.12         | -3.70           | -1.18     | -4.06       | -2.24     | 1.92        | -2.33      | -1.72        | 1.83       | -1.00        | 1.71       | 1.78         |
| 234127_at   | ---        | ---                  | 0                                    | ---     | -3.95         | -1.49           | -1.41     | -1.25       | -1.39     | -1.03       | 1.00       | -1.07        | -1.78      | 1.06         | -1.10      | -1.06        |
| 234137_s_at | ---        | ---                  | 0                                    | ---     | -1.33         | -1.40           | 1.32      | 1.21        | -1.21     | 1.06        | 1.03       | -1.13        | -1.94      | -1.71        | -3.17      | -2.13        |
| 234148_at   | ---        | ---                  | 0                                    | ---     | 1.93          | 1.12            | -1.01     | 1.18        | 1.33      | 1.28        | 1.11       | 1.01         | -1.79      | -1.61        | -2.27      | -1.84        |
| 234159_at   | ---        | ---                  | 0                                    | ---     | -1.03         | -1.03           | 1.04      | 1.24        | 1.22      | 1.33        | -1.69      | -1.39        | -2.98      | -1.92        | -1.39      | -1.46        |
| 234164_at   | ---        | ---                  | 0                                    | ---     | 1.86          | 2.02            | -1.08     | -1.16       | 1.27      | 1.65        | 1.16       | -1.13        | -1.99      | -2.96        | -3.69      | -2.64        |
| 234169_at   | ---        | ---                  | 0                                    | ---     | -1.26         | 1.23            | -1.18     | 1.13        | -1.83     | -1.52       | 1.04       | 1.17         | -1.07      | -1.12        | -1.09      | 1.06         |
| 234179_at   | ---        | ---                  | 0                                    | ---     | -1.80         | -1.59           | -2.51     | -2.39       | -2.12     | -1.65       | -3.28      | 1.65         | 3.02       | 1.36         | 2.44       | 2.70         |
| 234196_at   | ---        | ---                  | 0                                    | ---     | -1.35         | 3.86            | 1.21      | 4.43        | -1.88     | -1.78       | -2.79      | 2.39         | 4.67       | 1.43         | -6.85      | 1.39         |
| 234199_at   | ---        | ---                  | 0                                    | ---     | 2.07          | 2.09            | 1.02      | -1.29       | -1.09     | 7.02        | -5.91      | 1.05         | 1.04       | -1.24        | -1.02      | -1.66        |
| 234229_at   | ---        | ---                  | 0                                    | ---     | 1.64          | -1.07           | -1.02     | 2.00        | -1.03     | -1.37       | -1.29      | 1.31         | -1.85      | -2.90        | -4.24      | -5.11        |
| 234230_at   | ---        | ---                  | 0                                    | ---     | -2.74         | -1.69           | -3.24     | -1.42       | -9.18     | -1.12       | 1.23       | -1.21        | -1.02      | -7.38        | -2.66      | 1.15         |
| 234233_s_at | ---        | ---                  | 0                                    | ---     | 1.55          | 1.62            | 1.14      | -1.03       | -1.06     | -1.33       | -1.01      | -1.02        | 2.17       | 1.62         | 1.36       | 1.15         |
| 234255_at   | ---        | ---                  | 0                                    | ---     | 1.21          | -1.00           | 1.10      | -1.05       | -1.06     | 1.15        | 1.44       | -1.19        | -1.29      | -1.42        | -1.48      | -1.21        |
| 234330_at   | ---        | ---                  | 0                                    | ---     | 1.48          | 1.35            | 1.23      | 1.17        | 1.33      | 1.01        | -1.38      | -1.21        | -1.64      | -2.28        | -1.28      | -2.65        |
| 234348_at   | ---        | ---                  | 0                                    | ---     | 1.01          | -1.29           | -3.92     | -3.72       | -1.14     | 1.08        | 1.62       | 1.64         | 6.28       | 11.00        | 1.47       | -2.35        |
| 234359_at   | ---        | ---                  | 0                                    | ---     | -1.08         | -1.10           | 1.06      | 1.28        | 1.30      | 1.31        | 1.08       | -1.02        | 2.24       | 2.39         | 1.75       | 1.63         |
| 234380_x_at | ---        | ---                  | 0                                    | ---     | -1.13         | -1.36           | 1.49      | 1.37        | -1.76     | 1.20        | 1.36       | 1.44         | -1.52      | -2.30        | -1.92      | -2.47        |
| 234389_x_at | ---        | ---                  | 0                                    | ---     | -1.30         | -1.97           | -1.09     | 3.17        | 5.23      | 8.96        | -3.66      | -1.21        | 1.05       | -1.64        | 1.71       | 1.59         |
| 234467_at   | ---        | ---                  | 0                                    | ---     | 2.21          | 5.49            | -1.02     | -1.69       | -1.42     | 1.74        | 19.93      | 10.46        | 1.71       | 1.21         | 6.15       | 2.29         |
| 234487_at   | ---        | ---                  | 0                                    | ---     | 2.26          | 1.14            | -1.21     | -1.03       | 1.33      | -1.80       | -1.04      | 1.26         | -1.62      | -1.37        | -1.40      | -1.19        |
| 234505_at   | ---        | ---                  | 0                                    | ---     | -1.70         | 1.08            | 2.20      | 3.52        | -1.13     | -1.91       | -1.58      | 1.49         | -1.04      | -2.11        | -1.77      | -1.24        |
| 234510_at   | ---        | ---                  | 0                                    | ---     | 2.23          | 1.89            | 4.08      | 1.44        | -11.16    | -10.22      | -1.04      | -1.51        | -2.18      | -1.06        | 2.69       | 2.18         |
| 234549_at   | ---        | ---                  | 0                                    | ---     | -2.35         | -1.39           | -1.05     | 1.17        | -1.94     | -1.14       | 1.18       | -1.10        | 1.50       | 1.39         | -1.09      | -1.58        |
| 234562_x_at | ---        | ---                  | 0                                    | ---     | 1.32          | 1.05            | 1.28      | 1.22        | 1.01      | 1.02        | -1.32      | 1.06         | -1.39      | -1.49        | -2.14      | -2.01        |

| ID          | Gene Title | Chromosomal Location | 1st Gene Ontology Biological Process | Pathway | A2497 30 mins | A2497P' 30 mins | A2497 2 h | A2497P' 2 h | A2497 4 h | A2497P' 4 h | A2497 24 h | A2497P' 24 h | A2497 48 h | A2497P' 48 h | A2497 72 h | A2497P' 72 h |
|-------------|------------|----------------------|--------------------------------------|---------|---------------|-----------------|-----------|-------------|-----------|-------------|------------|--------------|------------|--------------|------------|--------------|
| 234563_at   | ---        | ---                  | 0                                    | ---     | 1.48          | 1.42            | 1.11      | -1.04       | 1.04      | 1.14        | -1.40      | -1.26        | -3.36      | -2.44        | -2.47      | -2.35        |
| 234566_at   | ---        | ---                  | 0                                    | ---     | 4.76          | 6.58            | 2.04      | -1.04       | -1.60     | -1.13       | 1.07       | 1.24         | 7.48       | 1.76         | 1.84       | 1.74         |
| 234578_at   | ---        | ---                  | 0                                    | ---     | 1.07          | -1.22           | -1.20     | -1.31       | -1.17     | 1.06        | 1.15       | 1.15         | 1.13       | 1.02         | -1.14      | 1.24         |
| 234582_at   | ---        | ---                  | 0                                    | ---     | 3.69          | 2.07            | 1.58      | -1.89       | -5.15     | -3.00       | -2.52      | -1.35        | 9.04       | 13.42        | -1.14      | 2.52         |
| 234596_at   | ---        | ---                  | 0                                    | ---     | 1.42          | -2.31           | 2.02      | 1.20        | -1.23     | 1.73        | 1.23       | -1.47        | -6.02      | -4.36        | -7.07      | -3.15        |
| 234597_at   | ---        | ---                  | 0                                    | ---     | 2.40          | 1.26            | 1.00      | -1.06       | 1.19      | 1.33        | 1.14       | 1.04         | -4.25      | -2.40        | -3.00      | -2.49        |
| 234643_x_at | ---        | ---                  | 0                                    | ---     | 1.51          | -1.17           | 2.27      | 3.23        | 1.07      | 2.33        | -3.83      | -1.32        | 1.94       | 1.34         | -1.10      | -1.13        |
| 234646_at   | ---        | ---                  | 0                                    | ---     | 5.10          | 1.95            | 1.42      | 2.07        | 1.25      | -1.43       | 1.12       | -2.63        | 10.23      | 1.83         | 2.34       | 3.87         |
| 234652_at   | ---        | ---                  | 0                                    | ---     | 1.06          | -1.01           | -1.07     | -1.09       | -1.23     | 1.22        | -1.07      | 1.08         | -1.62      | -2.15        | -2.33      | -5.20        |
| 234656_x_at | ---        | ---                  | 0                                    | ---     | -1.40         | -5.24           | 2.13      | -2.46       | -2.06     | -2.01       | 1.59       | 1.78         | 15.68      | 13.46        | -2.44      | -2.26        |
| 234675_x_at | ---        | ---                  | 0                                    | ---     | 1.15          | 1.10            | 1.05      | 1.02        | -1.10     | 1.18        | 1.04       | 1.19         | -1.68      | -1.68        | -1.81      | -1.70        |
| 234692_at   | ---        | ---                  | 0                                    | ---     | 2.95          | 1.59            | 1.34      | 1.43        | 2.03      | 1.58        | -1.07      | 1.27         | 1.89       | 2.59         | -4.22      | -1.94        |
| 234693_at   | ---        | ---                  | 0                                    | ---     | -3.44         | -1.51           | -1.30     | 1.23        | -4.02     | 1.21        | 1.74       | -2.53        | 4.72       | 6.67         | 1.20       | 1.27         |
| 234704_at   | ---        | ---                  | 0                                    | ---     | -1.06         | -1.05           | -1.08     | 1.00        | 1.10      | 1.06        | 1.13       | -1.05        | -1.21      | 1.08         | -1.43      | -1.56        |
| 234723_x_at | ---        | ---                  | 0                                    | ---     | 1.30          | 1.20            | -1.02     | -1.05       | 1.12      | 1.04        | 1.39       | 1.62         | -1.72      | -1.41        | -1.96      | -1.86        |
| 234744_x_at | ---        | ---                  | M phase of mitotic cell cycle        | ---     | -1.00         | -2.42           | -1.82     | 1.28        | 1.55      | -1.12       | -3.57      | 1.31         | 9.00       | 18.25        | -2.65      | -3.82        |
| 234780_at   | ---        | ---                  | 0                                    | ---     | 2.52          | 2.47            | -1.61     | -1.21       | 2.03      | 2.34        | 2.91       | 3.61         | 4.17       | 1.71         | -4.39      | -1.95        |
| 234887_at   | ---        | ---                  | 0                                    | ---     | 1.08          | -2.30           | -1.76     | -4.70       | -1.16     | -1.96       | 9.24       | 5.28         | -1.76      | -2.19        | -2.50      | 1.11         |
| 234892_at   | ---        | ---                  | 0                                    | ---     | 1.15          | -1.16           | -3.44     | -2.56       | 1.33      | -2.02       | -2.78      | -1.62        | 21.21      | 24.45        | 2.11       | 2.93         |
| 235028_at   | ---        | ---                  | 0                                    | ---     | 1.06          | -1.06           | 1.11      | -1.15       | 1.14      | 1.29        | -1.10      | -1.09        | -2.78      | -2.41        | -2.26      | -2.19        |
| 235031_at   | ---        | ---                  | 0                                    | ---     | -1.04         | -1.05           | 1.15      | -1.04       | 1.04      | 1.19        | -1.02      | 1.05         | -2.80      | -1.72        | -3.60      | -2.93        |
| 235058_at   | ---        | ---                  | 0                                    | ---     | 1.07          | -1.08           | -1.11     | -1.16       | 1.17      | -1.10       | -1.04      | 1.04         | 1.75       | 1.38         | 1.27       | 1.36         |
| 235078_at   | ---        | ---                  | 0                                    | ---     | 1.21          | 1.02            | -1.02     | 1.06        | 1.07      | 1.11        | -1.36      | -1.10        | -2.00      | -1.84        | -1.56      | -1.75        |
| 235092_at   | ---        | ---                  | 0                                    | ---     | -1.06         | -1.02           | 1.08      | 1.06        | 1.08      | 1.11        | -1.17      | -1.05        | -3.12      | -3.09        | -2.24      | -2.66        |
| 235123_at   | ---        | ---                  | 0                                    | ---     | 1.30          | 1.21            | -1.11     | -1.27       | 1.19      | 1.16        | -1.03      | 1.05         | -2.13      | -2.02        | -1.72      | -1.53        |
| 235138_at   | ---        | ---                  | 0                                    | ---     | 1.35          | 1.25            | -1.14     | -1.12       | 1.11      | 1.16        | 1.03       | -1.17        | -2.33      | -2.27        | -2.19      | -2.17        |
| 235157_at   | ---        | ---                  | 0                                    | ---     | 1.41          | 1.25            | 1.01      | 1.14        | -1.23     | -1.10       | 1.16       | 1.01         | -3.22      | -2.14        | -2.73      | -2.42        |
| 235159_at   | ---        | ---                  | 0                                    | ---     | 1.10          | 1.12            | 1.01      | -1.05       | -1.02     | 1.06        | -1.60      | -1.52        | -1.27      | -1.18        | -1.37      | -1.14        |
| 235193_at   | ---        | ---                  | 0                                    | ---     | 1.30          | 1.34            | 1.13      | -1.10       | 1.01      | 1.02        | -1.17      | 1.18         | -3.54      | -2.77        | -6.20      | -4.89        |
| 235206_at   | ---        | ---                  | 0                                    | ---     | -1.09         | -1.10           | 1.12      | 1.02        | 1.29      | 1.08        | 1.05       | 1.22         | 1.25       | 1.29         | -1.05      | -1.02        |
| 235211_at   | ---        | ---                  | 0                                    | ---     | -1.43         | -1.65           | -1.09     | 1.18        | -1.04     | -1.07       | -1.45      | -1.21        | -2.01      | -1.81        | -2.21      | -1.76        |
| 235286_at   | ---        | ---                  | 0                                    | ---     | 1.29          | 1.43            | 1.28      | 1.20        | 1.05      | 1.22        | -1.48      | -1.06        | -1.90      | -1.62        | -1.87      | -2.17        |
| 235288_at   | ---        | ---                  | 0                                    | ---     | -1.01         | -1.08           | -1.13     | -1.09       | -1.10     | 1.32        | 1.16       | 1.22         | -2.65      | -1.79        | -2.34      | -1.86        |
| 235374_at   | ---        | ---                  | 0                                    | ---     | 1.64          | 1.15            | -1.01     | 1.29        | 1.10      | 1.27        | 1.08       | -1.12        | -2.55      | -1.65        | -2.78      | -2.13        |
| 235380_at   | ---        | ---                  | 0                                    | ---     | -1.04         | 1.66            | 1.29      | -1.07       | -1.55     | -1.24       | 2.63       | 1.50         | 1.05       | 1.84         | -1.18      | 1.07         |
| 235392_at   | ---        | ---                  | 0                                    | ---     | 1.77          | 1.60            | 1.65      | 1.61        | 1.15      | 1.31        | -1.54      | -1.80        | -1.27      | -3.02        | -1.82      | -1.82        |
| 235407_at   | ---        | ---                  | 0                                    | ---     | 1.07          | 1.03            | -1.07     | -1.03       | -1.19     | 1.16        | -1.06      | 1.09         | 1.27       | 1.48         | 1.42       | 1.84         |
| 235419_at   | ---        | ---                  | 0                                    | ---     | 1.35          | -1.21           | 1.06      | 1.21        | 2.46      | 1.53        | 1.72       | 1.33         | 2.26       | 1.96         | 2.25       | 2.47         |
| 235422_at   | ---        | ---                  | 0                                    | ---     | 1.31          | 1.16            | -1.13     | -1.29       | -1.29     | -1.15       | -1.08      | -1.20        | -1.69      | -1.48        | -1.22      | -1.46        |
| 235434_at   | ---        | ---                  | 0                                    | ---     | 1.07          | 1.06            | 1.02      | -1.00       | -1.03     | 1.02        | -1.29      | -1.17        | 1.10       | 1.13         | 1.32       | 1.20         |
| 235441_at   | ---        | ---                  | 0                                    | ---     | 1.11          | -1.02           | 1.17      | 1.08        | -1.01     | -1.22       | 1.20       | 1.08         | 1.30       | -1.09        | 1.25       | 1.37         |
| 235473_at   | ---        | ---                  | 0                                    | ---     | 1.04          | 1.04            | 1.18      | -1.01       | -1.01     | -1.15       | -1.16      | 1.01         | -1.89      | -1.66        | -1.17      | -1.10        |
| 235477_at   | ---        | ---                  | 0                                    | ---     | 2.62          | 1.81            | 2.27      | 2.41        | -1.12     | 1.48        | 1.13       | -1.53        | 2.16       | 1.93         | 3.84       | 1.86         |
| 235511_at   | ---        | ---                  | 0                                    | ---     | -1.17         | -1.10           | 1.23      | 1.32        | 1.29      | 1.27        | 1.15       | -1.31        | -1.78      | -1.34        | -1.56      | -1.72        |
| 235513_at   | ---        | ---                  | 0                                    | ---     | -1.07         | -1.04           | 1.21      | 1.26        | 1.21      | 1.23        | 1.00       | -1.07        | -1.78      | -1.75        | 1.23       | 1.15         |
| 235530_at   | ---        | ---                  | 0                                    | ---     | -1.10         | -1.16           | 1.03      | 1.37        | 1.11      | 1.08        | -1.02      | -1.04        | 1.69       | 1.47         | -1.62      | -1.46        |
| 235531_at   | ---        | ---                  | 0                                    | ---     | 1.05          | 1.05            | -1.09     | -1.15       | -1.20     | -1.09       | -1.68      | -1.30        | -1.55      | -1.67        | -1.45      | -1.26        |
| 235538_at   | ---        | ---                  | 0                                    | ---     | 1.03          | 1.00            | -1.09     | -1.05       | -1.07     | 1.01        | -1.20      | 1.00         | -2.04      | -2.04        | -2.01      | -1.51        |
| 235543_at   | ---        | ---                  | 0                                    | ---     | -1.44         | -1.51           | -1.12     | 1.08        | 1.43      | 1.07        | -1.02      | 1.11         | -1.32      | -1.35        | -2.14      | -2.41        |
| 235551_at   | ---        | ---                  | 0                                    | ---     | 1.51          | 1.50            | -1.14     | -1.33       | 1.22      | 1.14        | -1.30      | -1.08        | -2.12      | -1.82        | -1.78      | -1.78        |
| 235571_at   | ---        | ---                  | 0                                    | ---     | -1.04         | -1.30           | 1.26      | 1.17        | 1.24      | 1.03        | -1.03      | -1.19        | -1.26      | -1.23        | -1.73      | -1.34        |
| 235573_at   | ---        | ---                  | 0                                    | ---     | 1.07          | 1.10            | -1.04     | -1.10       | -1.23     | -1.21       | -1.56      | -1.24        | -2.20      | -1.68        | -2.08      | -2.15        |
| 235575_at   | ---        | ---                  | 0                                    | ---     | 7.63          | 5.56            | -1.27     | -1.35       | 1.12      | 1.13        | 1.40       | 1.01         | -1.96      | -2.64        | -1.95      | -2.19        |
| 235581_at   | ---        | ---                  | 0                                    | ---     | -1.04         | -1.11           | 1.20      | 1.01        | 1.15      | 1.07        | -1.01      | 1.03         | -3.32      | -2.86        | -3.55      | -2.54        |
| 235585_at   | ---        | ---                  | 0                                    | ---     | -1.05         | 1.04            | -1.06     | -1.22       | -1.08     | -1.07       | -1.46      | -1.02        | -2.28      | -1.98        | -3.80      | -2.63        |
| 235594_at   | ---        | ---                  | 0                                    | ---     | -1.05         | 1.07            | 1.12      | 1.02        | -1.00     | 1.15        | 1.37       | 1.03         | -1.45      | -1.59        | -1.17      | -1.32        |
| 235601_at   | ---        | ---                  | 0                                    | ---     | 1.26          | 1.09            | -1.22     | -1.06       | -1.02     | 1.08        | 1.00       | 1.10         | -2.42      | -1.42        | -1.61      | -1.68        |
| 235608_at   | ---        | ---                  | 0                                    | ---     | 1.01          | -1.04           | 1.09      | 1.06        | 1.02      | 1.18        | 1.24       | 1.02         | 1.32       | 1.09         | 1.00       | -1.27        |
| 235630_at   | ---        | ---                  | 0                                    | ---     | 1.36          | 1.51            | 1.21      | 1.00        | -1.04     | -1.02       | -1.06      | -1.09        | -2.07      | -2.60        | -5.63      | -6.59        |
| 235640_at   | ---        | ---                  | 0                                    | ---     | -1.08         | 1.07            | -1.12     | 1.04        | -1.10     | -1.03       | -1.10      | 1.00         | -1.17      | -1.28        | -1.49      | -1.26        |
| 235655_at   | ---        | ---                  | 0                                    | ---     | -1.21         | -1.23           | 1.11      | -1.14       | 1.45      | 1.41        | -1.79      | -1.08        | -2.13      | -1.85        | -2.02      | -2.57        |
| 235656_s_at | ---        | ---                  | 0                                    | ---     | -1.30         | -1.41           | -1.04     | -1.24       | -1.29     | -1.19       | -1.18      | -1.27        | -1.92      | -1.49        | -1.34      | -1.67        |
| 235659_at   | ---        | ---                  | 0                                    | ---     | 1.05          | -1.04           | 1.06      | 1.08        | 1.12      | 1.18        | -1.13      | 1.06         | -1.09      | 1.02         | 1.62       | 2.11         |
| 235662_at   | ---        | ---                  | 0                                    | ---     | -1.87         | 1.23            | 1.00      | 1.23        | 1.28      | 1.36        | 1.47       | -1.95        | -1.44      | -3.51        | -1.98      | -1.98        |
| 235664_at   | ---        | ---                  | 0                                    | ---     | -1.29         | -1.22           | 1.19      | -1.59       | -1.09     | 1.07        | 1.89       | 3.32         | -4.10      | -2.37        | -1.67      | 1.40         |
| 235674_at   | ---        | ---                  | 0                                    | ---     | -1.03         | -1.24           | -1.27     | -1.15       | -1.05     | 1.03        | -1.08      | -1.14        | -1.36      | -1.23        | -1.29      | -1.52        |

| ID          | Gene Title | Chromosomal Location | 1st Gene Ontology Biological Process | Pathway | A2497 30 mins | A2497P' 30 mins | A2497 2 h | A2497P' 2 h | A2497 4 h | A2497P' 4 h | A2497 24 h | A2497P' 24 h | A2497 48 h | A2497P' 48 h | A2497 72 h | A2497P' 72 h |
|-------------|------------|----------------------|--------------------------------------|---------|---------------|-----------------|-----------|-------------|-----------|-------------|------------|--------------|------------|--------------|------------|--------------|
| 235676_at   | ---        | ---                  | 0                                    | ---     | -1.01         | -1.01           | 1.23      | 1.07        | 1.15      | 1.20        | -1.10      | -1.12        | -2.75      | -1.91        | -1.47      | -1.51        |
| 235679_at   | ---        | ---                  | 0                                    | ---     | 1.10          | 1.01            | -1.00     | -1.01       | 1.06      | -1.05       | -1.27      | -1.18        | -1.15      | -1.13        | -1.43      | -1.20        |
| 235681_at   | ---        | ---                  | 0                                    | ---     | 1.32          | 1.17            | 1.30      | -1.10       | -1.29     | 1.01        | 1.02       | 1.58         | -1.27      | -1.63        | -1.71      | -1.85        |
| 235693_at   | ---        | ---                  | 0                                    | ---     | 1.57          | 1.74            | 1.12      | 1.03        | 1.12      | 1.10        | -1.24      | -1.07        | -2.97      | -1.83        | -2.13      | -1.78        |
| 235697_at   | ---        | ---                  | 0                                    | ---     | 1.11          | 1.06            | 1.01      | 1.06        | 1.09      | -1.08       | -1.05      | -1.08        | -2.62      | -1.90        | -3.98      | -2.71        |
| 235704_at   | ---        | ---                  | 0                                    | ---     | 1.02          | -1.24           | -1.34     | -1.08       | -1.25     | -1.90       | 1.46       | -1.50        | 1.75       | 1.34         | 1.37       | 1.11         |
| 235705_at   | ---        | ---                  | 0                                    | ---     | 1.26          | 1.06            | -1.08     | -1.14       | -1.03     | 1.23        | 1.09       | -1.12        | -1.93      | -1.51        | -1.38      | -1.38        |
| 235730_at   | ---        | ---                  | 0                                    | ---     | 1.40          | 1.21            | 1.29      | 1.19        | 1.23      | 1.22        | -1.16      | 1.33         | -2.20      | -2.25        | -2.22      | -1.98        |
| 235739_at   | ---        | ---                  | 0                                    | ---     | 1.27          | -1.04           | 1.05      | 1.03        | 1.35      | -1.00       | 2.27       | 1.37         | 2.47       | 2.28         | 2.26       | 1.17         |
| 235743_at   | ---        | ---                  | 0                                    | ---     | 1.63          | 2.46            | -1.20     | -1.27       | 1.45      | 1.57        | 1.01       | -1.54        | -2.52      | -1.88        | -3.81      | -1.93        |
| 235759_at   | ---        | ---                  | 0                                    | ---     | 1.17          | -1.03           | 1.00      | 1.10        | -1.25     | 1.13        | -1.05      | -1.06        | -1.40      | -1.33        | -1.58      | -1.88        |
| 235771_at   | ---        | ---                  | 0                                    | ---     | 1.11          | -1.11           | 1.04      | 1.15        | 1.47      | 1.34        | 1.12       | 1.16         | -1.57      | -1.64        | -1.84      | -2.30        |
| 235772_at   | ---        | ---                  | 0                                    | ---     | -1.26         | -1.06           | 1.58      | 1.37        | -1.28     | -1.05       | -1.46      | 1.03         | -6.24      | -4.57        | -3.02      | -4.53        |
| 235784_at   | ---        | ---                  | 0                                    | ---     | 1.03          | -1.07           | -1.05     | -1.05       | 1.28      | 1.31        | -1.39      | -1.45        | -1.73      | -1.27        | -2.04      | -1.66        |
| 235786_at   | ---        | ---                  | 0                                    | ---     | 1.43          | 1.32            | 1.18      | 1.21        | 1.11      | 1.07        | -1.07      | -1.07        | -1.96      | -1.94        | -1.86      | -1.79        |
| 235800_at   | ---        | ---                  | 0                                    | ---     | -1.21         | -1.22           | 1.16      | 1.12        | -1.35     | -1.09       | -1.19      | 1.16         | -1.30      | -1.08        | -6.20      | -1.85        |
| 235803_at   | ---        | ---                  | 0                                    | ---     | 1.37          | 1.73            | -1.04     | -1.15       | 1.08      | 1.02        | -1.03      | -1.12        | -2.36      | -2.14        | -1.82      | -1.96        |
| 235804_at   | ---        | ---                  | 0                                    | ---     | 1.11          | 1.19            | 1.27      | 1.20        | 1.31      | 1.10        | -1.04      | -1.18        | -1.63      | -1.34        | -1.59      | -1.60        |
| 235805_at   | ---        | ---                  | 0                                    | ---     | -1.69         | -1.76           | 3.17      | 2.31        | -1.15     | 1.37        | 2.19       | -1.05        | 1.79       | 1.18         | 1.72       | 1.43         |
| 235825_at   | ---        | ---                  | 0                                    | ---     | 1.25          | 1.57            | 1.91      | 2.18        | 1.09      | -1.11       | -1.14      | 1.20         | -1.90      | -1.83        | 1.24       | 1.11         |
| 235830_at   | ---        | ---                  | 0                                    | ---     | -1.24         | -1.09           | 1.09      | -1.09       | -1.08     | -1.04       | -1.01      | 1.00         | -1.62      | -1.67        | -1.54      | -1.39        |
| 235831_at   | ---        | ---                  | 0                                    | ---     | 1.19          | -1.55           | -1.03     | -1.15       | -1.44     | -1.36       | 1.25       | 1.11         | 1.43       | 2.15         | 2.36       | 2.95         |
| 235879_at   | ---        | ---                  | 0                                    | ---     | 1.54          | 1.03            | 1.02      | 1.20        | 1.02      | 1.30        | -1.19      | -1.07        | -2.07      | -1.88        | -1.86      | -1.58        |
| 235883_at   | ---        | ---                  | 0                                    | ---     | -1.21         | 1.04            | -1.12     | 1.38        | 1.17      | 1.26        | -1.22      | 1.37         | -2.00      | -2.84        | -4.72      | -2.91        |
| 235889_at   | ---        | ---                  | 0                                    | ---     | -1.10         | -1.32           | 1.07      | -1.17       | 1.05      | 1.30        | -1.36      | -1.06        | -1.62      | -1.27        | -3.28      | -2.04        |
| 235902_at   | ---        | ---                  | 0                                    | ---     | 1.26          | 1.34            | -1.04     | -1.01       | 1.16      | 1.13        | -1.07      | -1.01        | -2.24      | -1.98        | -2.38      | -1.63        |
| 235912_at   | ---        | ---                  | 0                                    | ---     | 1.23          | 1.29            | -1.05     | -1.09       | -1.11     | 1.14        | 1.11       | 1.03         | -1.64      | -1.65        | -1.26      | -1.18        |
| 235920_at   | ---        | ---                  | 0                                    | ---     | 1.07          | -1.11           | 1.06      | 1.40        | -1.23     | -1.09       | 1.38       | 1.23         | -1.59      | -1.27        | -2.27      | -1.49        |
| 235924_at   | ---        | ---                  | 0                                    | ---     | 1.11          | 1.04            | 1.09      | 1.12        | 1.02      | 1.18        | -1.77      | -1.21        | -1.51      | -1.06        | -1.71      | -1.57        |
| 235925_at   | ---        | ---                  | 0                                    | ---     | 1.78          | 1.52            | 1.03      | 1.36        | -1.28     | -1.06       | 1.23       | -1.41        | -1.85      | -1.55        | -2.28      | -1.94        |
| 235947_at   | ---        | ---                  | 0                                    | ---     | -1.21         | -1.35           | -1.04     | 1.23        | -1.17     | -1.03       | 1.10       | 1.22         | 1.14       | 1.16         | -1.61      | -1.13        |
| 235963_at   | ---        | ---                  | 0                                    | ---     | 2.27          | 4.02            | 1.09      | -1.39       | -1.89     | 1.44        | -1.58      | 1.02         | 4.70       | 1.38         | 5.84       | 3.19         |
| 235965_at   | ---        | ---                  | 0                                    | ---     | 1.79          | 1.32            | -1.02     | -1.09       | 1.24      | 1.06        | 1.47       | 1.82         | 2.28       | 1.93         | 2.16       | 2.07         |
| 235971_at   | ---        | ---                  | 0                                    | ---     | 1.01          | -1.03           | 1.16      | 1.22        | 1.10      | 1.03        | 1.10       | 1.16         | 1.23       | 1.20         | 1.27       | 1.17         |
| 235973_at   | ---        | ---                  | 0                                    | ---     | 1.27          | 1.21            | -1.02     | 1.09        | 1.22      | 1.12        | 1.18       | -1.03        | 2.39       | 2.19         | 1.27       | -1.27        |
| 235983_at   | ---        | ---                  | 0                                    | ---     | 1.23          | 1.33            | 1.64      | 1.15        | 1.05      | -1.35       | -1.71      | -1.15        | 2.04       | 1.99         | -1.49      | -1.60        |
| 235985_at   | ---        | ---                  | 0                                    | ---     | -1.06         | 1.17            | 1.12      | 1.27        | 1.12      | 1.23        | 1.16       | 1.19         | -2.14      | -1.88        | -2.21      | -1.93        |
| 235989_at   | ---        | ---                  | 0                                    | ---     | 1.07          | 1.04            | 1.10      | 1.07        | -1.07     | -1.01       | -1.21      | -1.07        | -1.60      | -1.31        | -1.45      | -1.28        |
| 235999_at   | ---        | ---                  | 0                                    | ---     | -1.65         | -1.22           | -1.09     | -1.32       | -1.48     | -1.16       | 1.09       | 1.14         | 1.13       | -1.35        | -1.59      | -3.36        |
| 236000_s_at | ---        | ---                  | 0                                    | ---     | 1.02          | -1.06           | 1.02      | 1.12        | -1.01     | 1.13        | 1.15       | -1.10        | -1.84      | -1.88        | -1.92      | -1.38        |
| 236004_at   | ---        | ---                  | 0                                    | ---     | -1.05         | -1.13           | 1.10      | 1.06        | 1.13      | 1.14        | -1.65      | -1.23        | -1.99      | -1.99        | -2.45      | -2.17        |
| 236010_at   | ---        | ---                  | 0                                    | ---     | 1.29          | -1.15           | 1.27      | 1.26        | 1.14      | -1.01       | 1.01       | 1.08         | -2.23      | -2.88        | -2.23      | -2.39        |
| 236021_at   | ---        | ---                  | 0                                    | ---     | -3.08         | -1.52           | -2.27     | 1.34        | -2.04     | 1.85        | -1.37      | 1.03         | -1.39      | -1.47        | -1.92      | -1.95        |
| 236032_at   | ---        | ---                  | 0                                    | ---     | 1.14          | 1.00            | 1.06      | 1.12        | -1.00     | -1.14       | -1.12      | 1.01         | -1.65      | -1.50        | -1.92      | -1.74        |
| 236038_at   | ---        | ---                  | 0                                    | ---     | 1.03          | -1.04           | 1.12      | 1.08        | 1.15      | 1.22        | -1.35      | -1.02        | -2.06      | -1.52        | -2.07      | -1.77        |
| 236063_at   | ---        | ---                  | 0                                    | ---     | -1.12         | 1.10            | 1.14      | 1.10        | 1.02      | 1.05        | -1.20      | -1.14        | -1.52      | -1.37        | -1.50      | -1.49        |
| 236067_at   | ---        | ---                  | 0                                    | ---     | 1.28          | 1.24            | 1.11      | 1.03        | 1.11      | 1.26        | -1.04      | 1.17         | -2.25      | -1.80        | -1.28      | -1.44        |
| 236072_at   | ---        | ---                  | 0                                    | ---     | -1.07         | -1.03           | 1.04      | -1.04       | -1.00     | 1.07        | -1.31      | -1.08        | -1.87      | -1.71        | -2.21      | -1.85        |
| 236084_at   | ---        | ---                  | 0                                    | ---     | 1.15          | 2.50            | -2.23     | -3.10       | -2.51     | -1.65       | 1.94       | 1.17         | 2.76       | 1.40         | 2.92       | 3.60         |
| 236097_at   | ---        | ---                  | 0                                    | ---     | 1.10          | -1.10           | -1.10     | -1.06       | 1.02      | -1.05       | 1.02       | -1.02        | -1.22      | -1.10        | 1.24       | 1.40         |
| 236106_at   | ---        | ---                  | 0                                    | ---     | -1.02         | -1.00           | 1.04      | -1.09       | -1.07     | -1.05       | -1.28      | -1.04        | -2.37      | -2.68        | -2.59      | -3.03        |
| 236116_at   | ---        | ---                  | 0                                    | ---     | 1.36          | -1.01           | 1.15      | 1.16        | 1.22      | 1.07        | -1.15      | -1.11        | -1.99      | -1.69        | -1.93      | -2.85        |
| 236117_at   | ---        | ---                  | 0                                    | ---     | -1.11         | -1.18           | 1.21      | 1.13        | 1.00      | -1.03       | -1.20      | -1.00        | -1.27      | -1.06        | 1.22       | 1.30         |
| 236120_at   | ---        | ---                  | 0                                    | ---     | 1.02          | -1.05           | 1.19      | 1.19        | -1.72     | 1.14        | -1.00      | -1.63        | -2.75      | -1.66        | -2.04      | -2.81        |
| 236125_at   | ---        | ---                  | 0                                    | ---     | 1.14          | 1.25            | 1.14      | 1.20        | 1.36      | 1.39        | -1.44      | -1.14        | -1.89      | -1.40        | -1.24      | -1.98        |
| 236127_at   | ---        | ---                  | 0                                    | ---     | 1.44          | 1.29            | 1.26      | 1.38        | -1.08     | -1.29       | 1.21       | 1.21         | 1.18       | 1.08         | -1.09      | -1.00        |
| 236131_at   | ---        | ---                  | 0                                    | ---     | -3.47         | 1.22            | 1.11      | -1.06       | 1.21      | 1.17        | -1.09      | -1.11        | -1.91      | -2.19        | -1.81      | -2.84        |
| 236139_at   | ---        | ---                  | 0                                    | ---     | 1.30          | 1.15            | 1.17      | 1.17        | 1.11      | 1.02        | 1.25       | 1.15         | -1.41      | -1.43        | -1.67      | -1.29        |
| 236143_at   | ---        | ---                  | 0                                    | ---     | -1.07         | 1.62            | 1.05      | -1.63       | 1.28      | 1.13        | 1.01       | -1.28        | -2.36      | -2.02        | -3.05      | -1.16        |
| 236153_at   | ---        | ---                  | 0                                    | ---     | -1.05         | 1.04            | 1.13      | -1.52       | 1.23      | -1.10       | -1.30      | -1.00        | -2.20      | -1.57        | -2.30      | -2.47        |
| 236161_at   | ---        | ---                  | 0                                    | ---     | 1.14          | -1.38           | -2.19     | 1.57        | -1.57     | 2.06        | -5.41      | 1.09         | 9.30       | 10.65        | 2.65       | 4.35         |
| 236168_at   | ---        | ---                  | 0                                    | ---     | 1.16          | 1.07            | 1.07      | 1.01        | 1.17      | 1.07        | 1.03       | 1.02         | -1.40      | -2.09        | -1.58      | -1.12        |
| 236170_x_at | ---        | ---                  | 0                                    | ---     | -1.19         | -1.23           | 1.08      | 1.13        | -1.15     | -1.02       | -1.69      | -1.21        | -3.04      | -2.28        | -2.44      | -2.38        |
| 236180_at   | ---        | ---                  | 0                                    | ---     | -1.39         | -1.49           | -1.12     | -1.06       | -1.16     | 1.22        | 1.39       | -1.09        | 1.09       | 1.09         | 1.16       | 2.05         |
| 236184_at   | ---        | ---                  | 0                                    | ---     | -1.90         | -1.67           | -1.39     | 1.00        | -2.14     | -4.44       | -7.28      | -3.10        | 3.16       | 4.46         | 2.58       | 1.74         |
| 236187_s_at | ---        | ---                  | 0                                    | ---     | -1.06         | 1.08            | -2.22     | 1.10        | 1.02      | -1.10       | 1.49       | 1.21         | 1.36       | 1.35         | 1.55       | 1.81         |

| ID          | Gene Title | Chromosomal Location | 1st Gene Ontology Biological Process | Pathway | A2497 30 mins | A2497P' 30 mins | A2497 2 h | A2497P' 2 h | A2497 4 h | A2497P' 4 h | A2497 24 h | A2497P' 24 h | A2497 48 h | A2497P' 48 h | A2497 72 h | A2497P' 72 h |
|-------------|------------|----------------------|--------------------------------------|---------|---------------|-----------------|-----------|-------------|-----------|-------------|------------|--------------|------------|--------------|------------|--------------|
| 236194_at   | ---        | ---                  | 0                                    | ---     | 1.03          | 1.08            | 1.05      | 1.04        | -1.08     | 1.04        | -1.34      | -1.11        | -1.63      | -1.26        | -1.74      | -1.60        |
| 236196_at   | ---        | ---                  | 0                                    | ---     | 1.30          | 1.07            | 1.02      | 1.09        | -1.13     | 1.01        | -1.36      | -1.16        | -2.19      | -2.20        | -2.29      | -3.15        |
| 236197_at   | ---        | ---                  | 0                                    | ---     | 1.39          | 1.42            | 1.53      | 1.43        | 1.19      | -1.45       | -2.26      | -1.52        | -1.30      | -1.29        | -4.08      | -2.05        |
| 236201_at   | ---        | ---                  | 0                                    | ---     | -1.42         | 1.69            | -1.03     | -2.75       | 1.25      | -2.39       | 1.36       | 1.76         | 1.04       | 2.15         | 1.22       | 1.11         |
| 236202_at   | ---        | ---                  | 0                                    | ---     | -1.24         | -1.23           | 1.25      | 1.56        | -1.03     | 1.19        | -1.13      | -1.04        | 1.04       | 1.24         | -2.72      | -1.48        |
| 236209_at   | ---        | ---                  | 0                                    | ---     | -1.06         | -1.07           | -1.06     | -1.11       | 1.17      | -1.18       | 1.40       | 1.09         | -2.97      | -1.97        | -2.99      | -2.50        |
| 236216_at   | ---        | ---                  | 0                                    | ---     | 1.05          | -1.06           | -1.01     | -1.06       | -1.02     | 1.14        | 1.00       | -1.25        | -2.32      | -2.13        | -1.86      | -1.72        |
| 236229_at   | ---        | ---                  | 0                                    | ---     | -1.16         | -1.20           | -1.04     | -1.17       | 1.16      | 1.05        | -1.23      | -1.15        | -2.10      | -1.53        | -1.55      | -1.33        |
| 236232_at   | ---        | ---                  | 0                                    | ---     | 1.13          | 1.22            | 1.01      | 1.16        | 1.03      | 1.18        | 1.08       | 1.13         | -1.68      | -1.59        | -2.36      | -1.30        |
| 236237_at   | ---        | ---                  | 0                                    | ---     | -1.21         | 1.11            | -1.71     | -1.81       | 2.42      | 2.48        | 1.48       | 1.22         | -2.05      | -4.46        | 1.33       | 2.02         |
| 236242_at   | ---        | ---                  | 0                                    | ---     | 1.07          | -1.09           | 1.04      | 1.16        | -1.04     | 1.20        | -1.36      | -1.07        | -1.37      | -1.34        | -1.05      | -1.27        |
| 236278_at   | ---        | ---                  | 0                                    | ---     | 1.72          | -1.29           | -1.01     | -1.43       | 1.23      | 1.16        | -1.15      | 1.42         | -1.69      | -1.52        | 2.34       | 3.97         |
| 236297_at   | ---        | ---                  | 0                                    | ---     | 1.03          | 1.10            | 1.06      | -1.04       | -1.15     | -1.03       | 1.10       | 1.41         | -1.98      | -1.42        | -2.22      | -2.19        |
| 236330_at   | ---        | ---                  | 0                                    | ---     | 1.15          | 1.44            | 1.18      | 1.07        | 1.04      | -1.01       | -1.38      | -1.03        | -4.06      | -4.14        | -3.53      | -5.47        |
| 236346_at   | ---        | ---                  | 0                                    | ---     | -1.10         | 1.13            | -1.01     | -1.01       | -1.02     | -1.12       | -1.32      | -1.10        | -2.27      | -2.16        | -2.38      | -2.01        |
| 236350_at   | ---        | ---                  | 0                                    | ---     | 1.07          | -1.02           | -1.05     | -1.20       | -1.00     | -1.21       | -1.17      | -1.06        | -1.79      | -1.33        | -1.36      | -1.37        |
| 236355_s_at | ---        | ---                  | 0                                    | ---     | -1.06         | -1.03           | -1.04     | 1.07        | 1.56      | 1.68        | 1.00       | -1.06        | -2.56      | -2.14        | -2.99      | -1.48        |
| 236364_at   | ---        | ---                  | 0                                    | ---     | 1.75          | 1.06            | -1.16     | 1.13        | -1.14     | 1.34        | 1.32       | 1.45         | 1.60       | 1.13         | 1.76       | 1.83         |
| 236379_at   | ---        | ---                  | 0                                    | ---     | 2.19          | 1.88            | 1.31      | 1.17        | 1.11      | 1.32        | -1.12      | -1.35        | -2.11      | -1.46        | -1.64      | -1.26        |
| 236380_at   | ---        | ---                  | 0                                    | ---     | -1.01         | -1.05           | 1.33      | 1.25        | 1.11      | -1.00       | -1.30      | -1.18        | -1.21      | -1.08        | -1.42      | -1.55        |
| 236393_at   | ---        | ---                  | 0                                    | ---     | 1.01          | -1.02           | 1.06      | 1.01        | 1.18      | -1.02       | 1.28       | 1.44         | -2.54      | -3.12        | -2.21      | -2.73        |
| 236396_at   | ---        | ---                  | 0                                    | ---     | -1.37         | -1.05           | 1.26      | 1.12        | 1.61      | 1.75        | -2.12      | 1.45         | -1.88      | -1.84        | -1.50      | -1.26        |
| 236397_at   | ---        | ---                  | 0                                    | ---     | 1.19          | 1.21            | 1.16      | 1.26        | -1.23     | 1.07        | -1.01      | -1.27        | 1.03       | -1.50        | -1.55      | -1.44        |
| 236404_at   | ---        | ---                  | 0                                    | ---     | 1.25          | -1.04           | 1.20      | 1.33        | 1.55      | 1.47        | 1.54       | 1.18         | -1.58      | -1.52        | -1.91      | -1.39        |
| 236411_at   | ---        | ---                  | 0                                    | ---     | 1.22          | 1.07            | -1.16     | -1.01       | 1.16      | 1.14        | -1.09      | -1.09        | -1.59      | -1.31        | -1.56      | -1.21        |
| 236427_at   | ---        | ---                  | 0                                    | ---     | 1.04          | -1.24           | 1.25      | 1.33        | -1.29     | 1.14        | 1.16       | -1.14        | -2.47      | -3.30        | -6.04      | -2.60        |
| 236428_at   | ---        | ---                  | 0                                    | ---     | -1.01         | -1.06           | -1.13     | 1.41        | 1.07      | 1.23        | -1.05      | 1.20         | -2.61      | -2.35        | -4.62      | -2.72        |
| 236439_at   | ---        | ---                  | 0                                    | ---     | 1.70          | 1.30            | 1.40      | 1.73        | 1.32      | 1.13        | 1.01       | 1.40         | 1.21       | -1.17        | 1.78       | 1.30         |
| 236446_at   | ---        | ---                  | 0                                    | ---     | 1.14          | 1.06            | 1.14      | -1.02       | 1.03      | 1.05        | -1.24      | -1.26        | -2.07      | -1.83        | -1.71      | -1.89        |
| 236452_at   | ---        | ---                  | 0                                    | ---     | -1.32         | -1.27           | -1.15     | 1.29        | 1.06      | 1.08        | 1.09       | -1.15        | -1.31      | -1.02        | -1.52      | -1.26        |
| 236453_at   | ---        | ---                  | 0                                    | ---     | 1.10          | 1.03            | -1.04     | -1.06       | -1.02     | 1.15        | -1.16      | -1.03        | -1.51      | -1.27        | -1.53      | -1.60        |
| 236472_at   | ---        | ---                  | 0                                    | ---     | -1.05         | -1.02           | 1.07      | 1.20        | -1.00     | -1.06       | 1.16       | 1.07         | -1.91      | -1.95        | -2.21      | -1.73        |
| 236476_at   | ---        | ---                  | 0                                    | ---     | 1.03          | 1.03            | -1.02     | 1.05        | 1.00      | 1.16        | -1.16      | -1.16        | -2.66      | -1.68        | -1.33      | -1.04        |
| 236483_at   | ---        | ---                  | 0                                    | ---     | -1.17         | -1.15           | 1.01      | 1.14        | -1.09     | 1.07        | -1.01      | -1.11        | -1.44      | -1.44        | -1.21      | -1.38        |
| 236501_at   | ---        | ---                  | 0                                    | ---     | -1.62         | -1.39           | -2.12     | -2.25       | -1.25     | 1.03        | 1.08       | 1.85         | -2.49      | -2.40        | 1.06       | 1.48         |
| 236502_at   | ---        | ---                  | 0                                    | ---     | 1.77          | 1.40            | 1.10      | 1.64        | 1.11      | 1.10        | -1.30      | -1.10        | -1.42      | -1.71        | -1.19      | 1.02         |
| 236503_at   | ---        | ---                  | 0                                    | ---     | 1.24          | 1.27            | -1.08     | -1.06       | -1.26     | 1.02        | -1.66      | -1.00        | -1.81      | -1.62        | -2.46      | -2.05        |
| 236509_at   | ---        | ---                  | 0                                    | ---     | 1.02          | 1.07            | 1.18      | 1.30        | 1.21      | -1.03       | -1.26      | -1.26        | -1.83      | -1.51        | -2.08      | -1.14        |
| 236511_at   | ---        | ---                  | 0                                    | ---     | 1.00          | 1.03            | 1.22      | 1.18        | 1.03      | 1.13        | -1.04      | -1.14        | -2.17      | -1.28        | -2.50      | -2.19        |
| 236513_at   | ---        | ---                  | 0                                    | ---     | 1.04          | -1.00           | 1.06      | 1.04        | -1.02     | 1.05        | -1.16      | -1.03        | 1.14       | 1.28         | 1.07       | 1.13         |
| 236515_at   | ---        | ---                  | 0                                    | ---     | 1.13          | 1.15            | -1.04     | -1.22       | -1.06     | -1.09       | -1.18      | -1.25        | -1.95      | -2.37        | -2.08      | -2.43        |
| 236520_at   | ---        | ---                  | 0                                    | ---     | -1.31         | -1.28           | -1.12     | 1.13        | 1.02      | 1.03        | -1.12      | 1.09         | -2.14      | -2.82        | -2.16      | -2.27        |
| 236522_at   | ---        | ---                  | 0                                    | ---     | 1.32          | 1.42            | 1.05      | 1.00        | -1.03     | -1.06       | -1.09      | 1.20         | -1.55      | -1.80        | -2.32      | -1.67        |
| 236537_at   | ---        | ---                  | 0                                    | ---     | 1.06          | 1.07            | 1.18      | 1.29        | 1.20      | 1.26        | 1.05       | -1.04        | -1.89      | -1.76        | -1.48      | -1.41        |
| 236547_at   | ---        | ---                  | 0                                    | ---     | 1.40          | 1.44            | -1.25     | 1.10        | -1.34     | -1.39       | -1.08      | 1.13         | -1.95      | -1.50        | -1.09      | -1.26        |
| 236549_x_at | ---        | ---                  | 0                                    | ---     | -4.08         | -1.96           | 1.07      | -2.09       | -1.99     | -1.01       | 1.06       | 1.47         | 2.17       | 1.19         | 1.07       | -1.35        |
| 236564_at   | ---        | ---                  | 0                                    | ---     | -2.55         | -1.93           | -2.30     | -1.19       | -1.17     | -4.43       | -3.68      | -1.61        | -1.27      | -1.25        | 1.72       | 1.55         |
| 236569_at   | ---        | ---                  | 0                                    | ---     | -1.05         | -1.02           | 1.05      | 1.12        | 1.10      | 1.07        | -1.22      | -1.48        | -2.26      | -1.80        | -1.78      | -1.45        |
| 236571_at   | ---        | ---                  | 0                                    | ---     | -1.34         | 1.52            | -1.27     | -1.45       | -1.42     | 1.23        | 1.71       | 1.48         | 1.23       | 1.05         | 2.25       | 3.12         |
| 236580_at   | ---        | ---                  | 0                                    | ---     | -1.10         | -1.03           | 1.19      | -1.06       | 1.03      | 1.02        | -1.58      | -1.18        | -3.14      | -5.61        | -1.92      | -6.50        |
| 236582_at   | ---        | ---                  | 0                                    | ---     | -1.09         | 1.58            | 1.07      | 1.39        | -2.33     | -1.25       | 1.49       | -1.16        | 1.64       | 1.36         | 2.60       | 1.23         |
| 236587_at   | ---        | ---                  | 0                                    | ---     | -1.27         | -1.18           | -1.04     | -1.16       | 1.29      | 1.39        | 1.29       | -1.14        | -3.03      | -2.43        | -4.70      | -4.02        |
| 236595_at   | ---        | ---                  | 0                                    | ---     | 1.06          | -1.01           | 1.03      | -1.16       | 1.52      | -1.05       | 2.11       | 1.73         | 1.72       | 1.82         | 1.53       | 1.64         |
| 236603_at   | ---        | ---                  | 0                                    | ---     | 1.10          | -1.29           | 1.10      | 1.03        | -1.13     | 1.08        | -1.67      | -1.14        | 1.34       | 1.10         | 1.12       | -1.06        |
| 236610_at   | ---        | ---                  | 0                                    | ---     | 1.29          | 1.10            | 1.02      | -1.06       | 1.09      | 1.14        | 1.02       | -1.22        | -1.99      | -2.21        | -2.46      | -2.36        |
| 236616_at   | ---        | ---                  | 0                                    | ---     | 1.36          | 1.21            | 1.15      | -1.04       | 1.13      | 1.18        | -1.20      | -1.19        | 1.12       | 1.10         | 1.45       | 1.75         |
| 236617_at   | ---        | ---                  | 0                                    | ---     | 2.58          | 1.57            | -1.23     | 1.24        | 1.45      | 1.06        | -1.33      | -1.07        | -6.61      | -2.70        | -3.51      | -5.89        |
| 236619_at   | ---        | ---                  | 0                                    | ---     | 1.10          | 1.14            | -1.01     | 1.15        | -1.23     | 1.27        | -1.35      | -1.16        | -2.30      | -2.34        | -2.07      | -2.65        |
| 236627_at   | ---        | ---                  | 0                                    | ---     | -1.18         | 1.02            | 1.08      | -1.13       | -1.61     | -1.24       | -1.10      | 1.21         | -5.87      | -2.17        | -2.09      | -3.51        |
| 236662_at   | ---        | ---                  | 0                                    | ---     | 1.05          | 1.13            | 1.09      | 1.03        | -1.23     | -1.28       | -1.13      | -1.21        | 1.12       | 1.14         | 1.31       | 1.90         |
| 236683_at   | ---        | ---                  | 0                                    | ---     | 1.28          | 1.25            | -1.05     | 1.21        | 1.10      | 1.14        | 1.05       | -1.18        | -3.65      | -1.96        | -1.94      | -1.56        |
| 236691_at   | ---        | ---                  | 0                                    | ---     | -1.18         | 1.15            | 1.35      | 1.59        | -1.13     | -1.01       | -1.47      | -1.23        | -13.29     | -4.70        | -8.33      | -1.25        |
| 236704_at   | ---        | ---                  | 0                                    | ---     | 1.05          | 1.04            | 1.27      | 1.02        | 1.25      | 1.60        | -1.27      | -1.20        | -2.10      | -1.57        | -2.33      | -1.97        |
| 236712_at   | ---        | ---                  | 0                                    | ---     | -1.09         | 1.03            | 1.01      | 1.06        | 1.05      | -1.27       | -1.24      | -1.01        | -2.23      | -2.43        | -2.59      | -2.60        |
| 236713_at   | ---        | ---                  | 0                                    | ---     | 2.17          | -1.10           | 3.61      | 3.75        | 1.24      | 2.03        | -2.40      | -2.48        | -1.54      | 1.21         | -5.03      | -2.78        |
| 236723_at   | ---        | ---                  | 0                                    | ---     | -1.04         | -1.12           | 1.04      | 1.22        | -1.32     | -1.04       | -1.16      | -1.14        | -1.47      | -1.32        | -1.71      | -1.45        |

| ID          | Gene Title | Chromosomal Location | 1st Gene Ontology Biological Process | Pathway | A2497 30 mins | A2497P' 30 mins | A2497 2 h | A2497P' 2 h | A2497 4 h | A2497P' 4 h | A2497 24 h | A2497P' 24 h | A2497 48 h | A2497P' 48 h | A2497 72 h | A2497P' 72 h |
|-------------|------------|----------------------|--------------------------------------|---------|---------------|-----------------|-----------|-------------|-----------|-------------|------------|--------------|------------|--------------|------------|--------------|
| 236735_at   | ---        | ---                  | 0                                    | ---     | -1.11         | 1.19            | -1.25     | -6.00       | 3.70      | 5.76        | 1.92       | 1.69         | 5.25       | 5.14         | -4.87      | 1.09         |
| 236742_at   | ---        | ---                  | 0                                    | ---     | 1.15          | -1.15           | 1.14      | -1.28       | -1.27     | 1.31        | 1.33       | -1.15        | -2.59      | -1.94        | -2.81      | -2.07        |
| 236750_at   | ---        | ---                  | 0                                    | ---     | 1.26          | 1.56            | 1.10      | 1.64        | 3.65      | 3.10        | 2.42       | 1.62         | -3.82      | -2.44        | -1.53      | 1.33         |
| 236759_at   | ---        | ---                  | 0                                    | ---     | -1.55         | -2.04           | -1.86     | -1.35       | 1.87      | 1.62        | 1.35       | 2.38         | 1.36       | 1.46         | 1.11       | -1.46        |
| 236766_at   | ---        | ---                  | 0                                    | ---     | -1.75         | 1.10            | 1.66      | 1.30        | -1.35     | -1.17       | 1.22       | 1.44         | -3.50      | -3.08        | -1.95      | -1.82        |
| 236772_s_at | ---        | ---                  | 0                                    | ---     | 1.06          | 1.10            | 1.06      | 1.10        | -1.12     | 1.07        | -1.07      | -1.08        | -1.70      | -1.30        | -2.75      | -2.13        |
| 236775_s_at | ---        | ---                  | 0                                    | ---     | 1.14          | 1.64            | -1.32     | -4.71       | 2.12      | 1.30        | 2.50       | -1.47        | 2.60       | 1.77         | -5.70      | -2.08        |
| 236791_at   | ---        | ---                  | 0                                    | ---     | 1.13          | 1.28            | -1.07     | -1.12       | 1.64      | 1.60        | -1.19      | -1.36        | -1.11      | 1.37         | 1.55       | 1.65         |
| 236793_at   | ---        | ---                  | 0                                    | ---     | -2.90         | -2.96           | -1.54     | 1.15        | 2.09      | 2.01        | 7.54       | 7.38         | -1.46      | 3.86         | 1.92       | 3.13         |
| 236795_at   | ---        | ---                  | 0                                    | ---     | -1.08         | -1.13           | 1.01      | -1.08       | 1.21      | 1.20        | -1.43      | -1.15        | -2.36      | -1.78        | -3.77      | -2.73        |
| 236821_at   | ---        | ---                  | 0                                    | ---     | -1.50         | -1.22           | -1.13     | 1.01        | -1.27     | -1.24       | -1.59      | -1.44        | -3.35      | -1.62        | -2.90      | -1.36        |
| 236830_at   | ---        | ---                  | 0                                    | ---     | 1.23          | 1.28            | 1.10      | 1.09        | 1.15      | -1.08       | 1.10       | 1.34         | 1.22       | 1.44         | 1.75       | 1.49         |
| 236837_x_at | ---        | ---                  | 0                                    | ---     | 1.02          | 1.14            | 1.14      | 1.15        | -1.46     | -1.04       | -2.53      | -1.43        | -1.86      | -2.24        | -2.07      | -2.93        |
| 236865_at   | ---        | ---                  | 0                                    | ---     | -1.85         | -2.26           | -2.42     | 1.54        | -2.05     | -1.62       | 1.11       | 3.79         | 2.86       | 1.78         | 3.55       |              |
| 236869_at   | ---        | ---                  | 0                                    | ---     | -1.30         | -1.47           | 1.16      | 1.13        | -1.10     | 1.05        | 1.86       | 3.22         | -2.10      | -1.65        | -1.52      | -1.01        |
| 236873_at   | ---        | ---                  | 0                                    | ---     | -1.50         | -1.37           | 3.11      | -1.08       | -2.40     | -1.35       | 1.09       | 1.21         | 2.07       | 1.37         | 1.30       | 1.16         |
| 236878_at   | ---        | ---                  | 0                                    | ---     | 1.66          | -2.47           | 2.78      | 3.48        | -1.94     | 1.25        | 2.70       | 1.66         | -1.68      | -1.28        | 1.46       | 1.35         |
| 236882_at   | ---        | ---                  | 0                                    | ---     | 1.02          | -1.12           | -1.23     | -1.47       | -1.59     | 1.12        | -1.51      | -1.08        | -2.00      | -2.12        | -4.05      | -2.71        |
| 236883_at   | ---        | ---                  | 0                                    | ---     | 1.10          | 1.12            | 1.55      | 1.39        | 1.14      | 1.27        | 1.10       | 1.05         | -1.54      | -1.56        | -2.26      | -2.09        |
| 236897_at   | ---        | ---                  | 0                                    | ---     | 1.55          | 1.57            | 1.31      | 1.39        | -1.02     | 1.32        | -1.21      | 1.33         | -2.07      | -2.16        | -1.89      | -1.21        |
| 236898_at   | ---        | ---                  | 0                                    | ---     | 1.14          | 1.23            | -1.44     | -1.17       | 1.22      | 1.02        | 1.42       | 1.35         | 3.97       | 2.04         | 3.36       | 1.65         |
| 236913_at   | ---        | ---                  | 0                                    | ---     | 1.68          | 2.10            | 1.22      | 2.00        | 1.32      | -1.88       | 1.00       | -1.09        | 5.08       | 3.86         | 1.44       | 1.45         |
| 236921_at   | ---        | ---                  | 0                                    | ---     | 1.00          | -1.11           | -1.17     | 1.08        | 1.33      | 1.43        | 1.50       | 1.54         | 1.59       | -1.28        | -1.56      | -3.79        |
| 236922_at   | ---        | ---                  | 0                                    | ---     | 1.01          | 1.00            | -1.02     | 1.13        | -1.04     | 1.03        | 1.06       | 1.15         | 1.31       | 1.50         | 1.31       | 1.50         |
| 236934_at   | ---        | ---                  | 0                                    | ---     | -1.21         | -1.03           | 1.17      | -1.14       | 1.22      | -1.02       | -1.62      | -1.32        | -1.37      | -1.48        | -1.27      | -1.87        |
| 236936_at   | ---        | ---                  | 0                                    | ---     | 1.10          | -1.34           | -1.09     | 1.52        | 1.28      | 1.22        | -1.31      | 1.58         | 1.53       | 2.20         | 2.35       | 1.65         |
| 236940_at   | ---        | ---                  | 0                                    | ---     | 1.01          | -1.15           | -1.10     | 1.02        | -1.26     | 1.48        | -1.32      | -1.14        | 1.02       | 1.00         | -1.28      | -1.54        |
| 236947_at   | ---        | ---                  | 0                                    | ---     | 1.98          | 1.36            | 1.01      | 1.17        | -1.09     | 1.10        | 1.17       | 1.17         | -4.70      | -4.80        | -2.20      | -1.42        |
| 236959_s_at | ---        | ---                  | 0                                    | ---     | 1.41          | 1.36            | -3.59     | -6.07       | -3.72     | -9.22       | 1.60       | -2.96        | -1.51      | -1.66        | 1.19       | 1.19         |
| 236964_at   | ---        | ---                  | 0                                    | ---     | 1.17          | -1.47           | -1.38     | 1.54        | -2.87     | -2.77       | 2.01       | 3.05         | 1.49       | -1.23        | 1.03       | -1.26        |
| 236978_at   | ---        | ---                  | 0                                    | ---     | 1.06          | -1.73           | 1.54      | -1.01       | -1.08     | 1.06        | -1.13      | -1.05        | -2.88      | -2.38        | -1.88      | -2.66        |
| 236982_at   | ---        | ---                  | 0                                    | ---     | 1.16          | 1.08            | 1.26      | 1.12        | -1.05     | 1.02        | 1.05       | 1.32         | 1.03       | 1.69         | -1.02      | 1.19         |
| 236991_at   | ---        | ---                  | 0                                    | ---     | -1.12         | -1.21           | -1.30     | -1.02       | -1.48     | -1.15       | 1.37       | 1.30         | 1.63       | 1.51         | 1.34       | 1.45         |
| 236994_at   | ---        | ---                  | 0                                    | ---     | 1.09          | 1.04            | 1.19      | 1.00        | 1.03      | -1.04       | -1.44      | -1.22        | -1.44      | -1.71        | -1.62      | -1.73        |
| 237001_at   | ---        | ---                  | 0                                    | ---     | -1.04         | -1.15           | 1.36      | -1.01       | 1.67      | 1.29        | -1.23      | -1.17        | -1.74      | -1.25        | -1.83      | -2.46        |
| 237006_at   | ---        | ---                  | 0                                    | ---     | 1.15          | 1.55            | 1.08      | -1.07       | 1.11      | 1.33        | 1.14       | -1.18        | -2.69      | -1.67        | -1.91      | -1.56        |
| 237007_at   | ---        | ---                  | 0                                    | ---     | 2.30          | 4.24            | 1.59      | -2.82       | -4.69     | 1.30        | 2.84       | 2.10         | 10.18      | 9.19         | -1.40      | -3.88        |
| 237009_at   | ---        | ---                  | 0                                    | ---     | 1.19          | -6.98           | -5.08     | -1.14       | 1.07      | -1.37       | -1.51      | 1.76         | -1.02      | -1.02        | -1.16      | 2.01         |
| 237019_at   | ---        | ---                  | 0                                    | ---     | -1.07         | -1.32           | 1.21      | 1.48        | 1.44      | 1.09        | 1.25       | -1.04        | -1.40      | -2.40        | -1.67      | -2.05        |
| 237025_at   | ---        | ---                  | 0                                    | ---     | -1.54         | -1.53           | 1.30      | 1.48        | 1.31      | -1.10       | 1.00       | -2.13        | 2.43       | 2.42         | 1.51       | 1.70         |
| 237043_at   | ---        | ---                  | 0                                    | ---     | 1.10          | -1.20           | 1.15      | 1.08        | -1.17     | -1.06       | -1.69      | -1.08        | 1.11       | 1.05         | 1.22       | 1.49         |
| 237060_at   | ---        | ---                  | 0                                    | ---     | 1.47          | 1.16            | -1.16     | 1.24        | 1.48      | 1.03        | -1.02      | 1.31         | -1.83      | -1.19        | -1.28      | -1.72        |
| 237081_at   | ---        | ---                  | 0                                    | ---     | 1.14          | -1.03           | 1.03      | 1.34        | 1.02      | -1.06       | 1.04       | 1.33         | -2.12      | -2.00        | -1.98      | -1.62        |
| 237083_at   | ---        | ---                  | 0                                    | ---     | 1.06          | -1.67           | -1.00     | 1.10        | 2.04      | 1.20        | -1.58      | 1.44         | -2.37      | -1.41        | 1.01       | 2.08         |
| 237084_at   | ---        | ---                  | 0                                    | ---     | -1.74         | -1.16           | 1.22      | -1.21       | 1.02      | -1.33       | 1.10       | -1.49        | -1.15      | -1.50        | -2.38      | -2.78        |
| 237089_at   | ---        | ---                  | 0                                    | ---     | -1.71         | -2.17           | 1.04      | 2.10        | -3.46     | 1.23        | 1.20       | -1.00        | 8.90       | 2.58         | -1.02      | -1.03        |
| 237096_at   | ---        | ---                  | 0                                    | ---     | 1.62          | 1.04            | -1.15     | 1.27        | -1.23     | -1.03       | -1.02      | 1.50         | -2.03      | -2.46        | -2.25      | -1.99        |
| 237118_at   | ---        | ---                  | 0                                    | ---     | -1.03         | 1.12            | -1.36     | -1.10       | 1.06      | 1.04        | 1.58       | 1.42         | -1.95      | -2.14        | -1.47      | -1.45        |
| 237136_at   | ---        | ---                  | 0                                    | ---     | 1.11          | 1.12            | 1.16      | -1.05       | 1.18      | 1.64        | -1.06      | -1.15        | -2.34      | -2.58        | -2.05      | -1.42        |
| 237138_at   | ---        | ---                  | 0                                    | ---     | 6.02          | 2.89            | 1.31      | 1.49        | -3.50     | -2.85       | -1.31      | -1.30        | 1.30       | -2.10        | -1.12      | 1.01         |
| 237172_at   | ---        | ---                  | 0                                    | ---     | 1.36          | 1.31            | 1.09      | 1.08        | -1.00     | 1.07        | -1.01      | 1.23         | -2.90      | -2.98        | -3.82      | -2.86        |
| 237184_at   | ---        | ---                  | 0                                    | ---     | 1.24          | -1.14           | -1.03     | 1.06        | 1.14      | 1.25        | 1.13       | -1.06        | -2.33      | -2.05        | -2.50      | -1.80        |
| 237190_at   | ---        | ---                  | 0                                    | ---     | 1.03          | -1.11           | 1.13      | 1.11        | 1.24      | 1.16        | 1.09       | 1.11         | -1.29      | -1.37        | -1.11      | -1.10        |
| 237195_at   | ---        | ---                  | 0                                    | ---     | -1.25         | 1.48            | 3.11      | 1.36        | -1.08     | -1.49       | 1.76       | 1.71         | 1.72       | -1.17        | 1.93       | 4.32         |
| 237231_at   | ---        | ---                  | 0                                    | ---     | 1.50          | 1.32            | 1.06      | 1.64        | 1.38      | 1.25        | 1.44       | 2.12         | -3.74      | -3.26        | -8.30      | -4.05        |
| 237239_at   | ---        | ---                  | 0                                    | ---     | 1.16          | 1.06            | -1.14     | -1.01       | -1.01     | 1.15        | -1.66      | -1.61        | -3.87      | -2.52        | -2.32      | -2.62        |
| 237258_at   | ---        | ---                  | 0                                    | ---     | 8.04          | 2.23            | -1.00     | 1.19        | 2.37      | 1.20        | 3.23       | 4.96         | 3.88       | 2.80         | -1.03      | -1.19        |
| 237276_at   | ---        | ---                  | 0                                    | ---     | 1.12          | -1.30           | 1.36      | 1.30        | 1.08      | -1.03       | -1.08      | -1.01        | -1.84      | -1.73        | -2.35      | -1.20        |
| 237299_at   | ---        | ---                  | 0                                    | ---     | -1.08         | -1.07           | 1.01      | 1.00        | 1.08      | -1.06       | -1.42      | -1.09        | -2.28      | -2.35        | -3.23      | -2.63        |
| 237309_at   | ---        | ---                  | 0                                    | ---     | -1.11         | -1.17           | -1.07     | -1.02       | -1.23     | 1.27        | -1.33      | -1.11        | -2.34      | -1.77        | -3.26      | -3.15        |
| 237311_at   | ---        | ---                  | 0                                    | ---     | -1.33         | -1.46           | 1.08      | 1.05        | -1.27     | 1.11        | 1.17       | 1.26         | 1.77       | 2.15         | 1.04       | 1.22         |
| 237317_at   | ---        | ---                  | 0                                    | ---     | -1.07         | -1.06           | -1.11     | -1.21       | 1.11      | 1.16        | -1.25      | 1.03         | -2.27      | -2.34        | -1.64      | -1.91        |
| 237330_at   | ---        | ---                  | 0                                    | ---     | 1.24          | 1.24            | 1.12      | 1.18        | 1.17      | 1.18        | -1.36      | -1.47        | -2.02      | -1.54        | -1.81      | -1.82        |
| 237334_at   | ---        | ---                  | 0                                    | ---     | -1.05         | -1.30           | 1.20      | 1.41        | 1.69      | 1.72        | -1.98      | -1.24        | -5.40      | -2.93        | -3.84      | -2.31        |
| 237337_at   | ---        | ---                  | 0                                    | ---     | 1.36          | 1.15            | 1.09      | 1.16        | 1.54      | 1.43        | -1.67      | -1.12        | 1.03       | 1.40         | 1.13       | 1.17         |
| 237348_at   | ---        | ---                  | 0                                    | ---     | 1.15          | 1.36            | 1.27      | 1.06        | 1.07      | -1.09       | -1.14      | -1.08        | -1.47      | -1.34        | 1.19       | -1.66        |

| ID          | Gene Title | Chromosomal Location | 1st Gene Ontology Biological Process | Pathway | A2497 30 mins | A2497P' 30 mins | A2497 2 h | A2497P' 2 h | A2497 4 h | A2497P' 4 h | A2497 24 h | A2497P' 24 h | A2497 48 h | A2497P' 48 h | A2497 72 h | A2497P' 72 h |
|-------------|------------|----------------------|--------------------------------------|---------|---------------|-----------------|-----------|-------------|-----------|-------------|------------|--------------|------------|--------------|------------|--------------|
| 237361_at   | ---        | ---                  | 0                                    | ---     | 1.17          | -1.42           | -1.51     | -1.29       | -1.39     | 1.51        | 1.59       | 1.99         | -1.63      | -1.83        | 2.72       | 4.49         |
| 237364_at   | ---        | ---                  | 0                                    | ---     | -2.30         | -1.09           | 1.25      | 1.10        | -1.57     | 1.24        | 1.29       | 1.05         | 1.67       | -1.03        | 1.54       | 1.51         |
| 237377_at   | ---        | ---                  | 0                                    | ---     | 1.52          | 1.26            | 1.12      | -1.11       | 1.07      | 1.16        | 1.17       | 1.13         | -2.73      | -2.56        | -1.99      | -2.30        |
| 237387_at   | ---        | ---                  | 0                                    | ---     | 1.22          | 1.27            | 1.37      | 1.05        | 1.10      | 1.42        | -2.13      | -1.58        | -1.64      | -1.69        | -1.46      | -2.49        |
| 237390_at   | ---        | ---                  | 0                                    | ---     | 4.63          | 2.32            | -2.29     | -4.26       | 1.30      | -1.70       | 5.79       | 2.38         | 2.38       | 7.66         | 1.78       | 2.73         |
| 237419_at   | ---        | ---                  | 0                                    | ---     | -1.04         | -1.10           | -1.06     | 1.14        | 1.13      | 1.01        | -1.17      | -1.14        | -1.28      | -1.21        | -1.58      | -1.50        |
| 237427_at   | ---        | ---                  | 0                                    | ---     | 2.17          | -1.45           | 1.23      | -1.97       | -2.69     | -3.41       | 10.82      | 3.08         | -1.01      | -7.09        | 1.97       | 1.22         |
| 237435_at   | ---        | ---                  | 0                                    | ---     | 1.41          | 1.37            | -1.19     | -1.36       | 1.34      | 1.16        | -1.83      | -1.48        | 4.09       | 2.90         | 2.23       | 2.27         |
| 237462_at   | ---        | ---                  | 0                                    | ---     | -2.60         | 1.44            | -1.23     | -1.41       | 2.49      | 1.24        | -4.07      | -1.31        | 7.44       | 2.85         | -2.48      | 1.11         |
| 237467_at   | ---        | ---                  | 0                                    | ---     | -1.43         | -1.95           | -1.49     | -1.33       | 1.23      | -1.12       | 1.43       | 3.18         | -1.16      | -1.68        | 1.75       | 6.34         |
| 237474_at   | ---        | ---                  | 0                                    | ---     | 2.10          | 1.26            | -2.54     | -1.46       | 1.00      | 1.23        | 1.86       | 2.15         | 2.05       | -1.39        | -3.12      | -7.40        |
| 237479_at   | ---        | ---                  | 0                                    | ---     | 2.40          | 2.57            | 1.13      | -1.33       | -1.53     | 1.04        | 1.21       | -1.28        | 1.77       | 1.57         | -4.03      | 1.45         |
| 237521_x_at | ---        | ---                  | 0                                    | ---     | 8.83          | 3.15            | 1.32      | 1.91        | -1.09     | -1.15       | 5.95       | 7.46         | 1.15       | 1.23         | 2.53       | 3.95         |
| 237542_at   | ---        | ---                  | 0                                    | ---     | 1.21          | -2.97           | -2.24     | -3.70       | 1.99      | 1.76        | -1.12      | -1.55        | 1.15       | 1.55         | 1.23       | 1.09         |
| 237548_at   | ---        | ---                  | 0                                    | ---     | 1.38          | 1.31            | -1.01     | 1.13        | -1.92     | -1.25       | -1.39      | -1.28        | 2.25       | 1.51         | 1.11       | 1.14         |
| 237562_at   | ---        | ---                  | 0                                    | ---     | -4.87         | -1.64           | -1.43     | 1.39        | -1.68     | -2.33       | -2.35      | 1.17         | -1.44      | 1.44         | -6.89      | -2.52        |
| 237569_at   | ---        | ---                  | 0                                    | ---     | -2.01         | -1.79           | 2.03      | 1.44        | -3.90     | 1.11        | -2.10      | -1.40        | 2.20       | 5.35         | 2.05       | 1.52         |
| 237571_at   | ---        | ---                  | 0                                    | ---     | 1.09          | -1.29           | 1.31      | 1.25        | 1.09      | 1.12        | 1.39       | 1.21         | 1.14       | 1.13         | 1.29       | 1.30         |
| 237582_at   | ---        | ---                  | 0                                    | ---     | -1.37         | -4.25           | 2.90      | 6.69        | 1.25      | -8.19       | -2.03      | 1.22         | 4.26       | 3.77         | 3.67       | 3.54         |
| 237594_at   | ---        | ---                  | 0                                    | ---     | 1.22          | -1.21           | 1.63      | 1.40        | -1.08     | 1.03        | -1.27      | 1.04         | -2.34      | -2.62        | -1.60      | -1.41        |
| 237597_at   | ---        | ---                  | 0                                    | ---     | 1.35          | 1.91            | 1.92      | -2.65       | -1.02     | 2.11        | -1.11      | -1.18        | 3.86       | 3.73         | 4.58       | 1.43         |
| 237622_at   | ---        | ---                  | 0                                    | ---     | 1.35          | 1.59            | 1.21      | 1.06        | -1.06     | 1.04        | 1.18       | 1.53         | 1.76       | 1.66         | 1.13       | 1.23         |
| 237624_at   | ---        | ---                  | 0                                    | ---     | -1.30         | -1.19           | -1.15     | 1.21        | 1.17      | 1.37        | 1.01       | 1.22         | -1.90      | -2.93        | -1.89      | -1.86        |
| 237627_at   | ---        | ---                  | 0                                    | ---     | 1.49          | 1.06            | 1.04      | -1.03       | 8.28      | 8.71        | -1.90      | -1.18        | -7.34      | -2.75        | -3.46      | -2.81        |
| 237634_at   | ---        | ---                  | 0                                    | ---     | -1.12         | 1.03            | -1.14     | -1.38       | 1.14      | 1.27        | -1.16      | -1.51        | -1.76      | -3.59        | -2.22      | -2.39        |
| 237644_at   | ---        | ---                  | 0                                    | ---     | -1.93         | 1.04            | -3.27     | 1.83        | -1.46     | -2.25       | 1.86       | -1.62        | 6.08       | 3.69         | 2.17       | 3.88         |
| 237680_at   | ---        | ---                  | 0                                    | ---     | 1.05          | 1.05            | 3.86      | 3.03        | -1.02     | 1.36        | -1.38      | -1.25        | 1.94       | 3.41         | 1.54       | 1.27         |
| 237695_at   | ---        | ---                  | 0                                    | ---     | -1.10         | -1.20           | 1.22      | 1.18        | 1.38      | 1.08        | -1.95      | -1.07        | -1.63      | -2.00        | -3.60      | -3.23        |
| 237700_at   | ---        | ---                  | 0                                    | ---     | -1.41         | -1.09           | -1.39     | 1.02        | 1.37      | 1.18        | 1.38       | 1.08         | -2.30      | -3.55        | -2.29      | -2.87        |
| 237707_at   | ---        | ---                  | 0                                    | ---     | -2.61         | -1.48           | 1.09      | 1.18        | 1.17      | 1.46        | 1.11       | -1.08        | -1.91      | -1.30        | -1.90      | -1.80        |
| 237710_at   | ---        | ---                  | 0                                    | ---     | -3.28         | -1.72           | -1.47     | -3.10       | 1.00      | -1.14       | 1.08       | -1.53        | 1.27       | 1.21         | 3.72       | 2.87         |
| 237713_at   | ---        | ---                  | 0                                    | ---     | -1.42         | -1.02           | -1.71     | 1.74        | 1.19      | 1.57        | 1.06       | 1.32         | -1.23      | -1.23        | -1.65      | -1.52        |
| 237728_at   | ---        | ---                  | 0                                    | ---     | 1.00          | 1.31            | 1.26      | -1.35       | 1.42      | -1.12       | -1.50      | 1.66         | -1.18      | -2.34        | 2.12       | -1.02        |
| 237742_at   | ---        | ---                  | 0                                    | ---     | -1.05         | 1.19            | 1.05      | 1.02        | 1.00      | 1.00        | -1.07      | -1.16        | -1.54      | -1.56        | -2.11      | -2.55        |
| 237743_at   | ---        | ---                  | 0                                    | ---     | -1.47         | -1.63           | 1.08      | -1.53       | 1.08      | 8.20        | 2.44       | 2.66         | 1.75       | 2.66         | 3.29       | 4.48         |
| 237747_at   | ---        | ---                  | 0                                    | ---     | 1.23          | 1.31            | 1.22      | 1.26        | 1.35      | 1.01        | -1.07      | 1.01         | -2.90      | -2.23        | -1.47      | -2.31        |
| 237768_x_at | ---        | ---                  | 0                                    | ---     | 1.20          | -1.01           | 1.13      | 1.08        | 1.14      | 1.19        | 1.09       | 1.01         | -1.51      | -1.46        | -2.01      | -1.66        |
| 237798_at   | ---        | ---                  | 0                                    | ---     | 1.12          | -1.22           | -1.04     | 1.02        | -1.42     | 1.01        | -1.04      | 1.02         | 1.14       | -3.03        | -1.98      | -1.38        |
| 237852_at   | ---        | ---                  | 0                                    | ---     | -1.76         | 1.29            | -2.18     | -5.33       | -1.49     | -2.99       | 2.13       | 2.70         | -1.19      | -3.15        | 2.95       | 4.29         |
| 237865_x_at | ---        | ---                  | 0                                    | ---     | -1.19         | -1.01           | 1.40      | 1.08        | 13.94     | 2.68        | 1.57       | -2.02        | 1.24       | -1.06        | 1.23       | 2.34         |
| 237878_at   | ---        | ---                  | 0                                    | ---     | 1.28          | -1.18           | -1.23     | 1.44        | 1.28      | 1.36        | -1.47      | 1.05         | 2.16       | 3.21         | -1.12      | -1.37        |
| 237881_at   | ---        | ---                  | 0                                    | ---     | 1.85          | 1.65            | 1.10      | -1.37       | 1.07      | -1.12       | -1.16      | -1.35        | -2.32      | -2.31        | -3.98      | -2.63        |
| 237895_at   | ---        | ---                  | 0                                    | ---     | -1.40         | -1.22           | 1.08      | 1.10        | 1.10      | 1.01        | -1.41      | -1.40        | -2.27      | -1.92        | -2.65      | -2.19        |
| 237914_s_at | ---        | ---                  | 0                                    | ---     | 1.00          | -1.04           | -1.01     | 1.08        | 1.11      | 1.05        | 1.39       | 1.15         | 1.61       | 1.59         | 1.10       | 1.14         |
| 237923_at   | ---        | ---                  | 0                                    | ---     | 1.04          | 1.11            | -1.17     | -1.11       | 1.30      | 1.25        | -1.03      | 1.40         | 2.13       | 2.36         | 1.01       | 1.01         |
| 237948_at   | ---        | ---                  | 0                                    | ---     | -1.64         | 1.46            | -1.65     | -6.97       | 5.92      | -1.61       | 6.42       | 2.66         | 4.80       | 10.20        | -2.47      | -2.55        |
| 237963_x_at | ---        | ---                  | 0                                    | ---     | -1.06         | 1.11            | -1.09     | -1.06       | 1.18      | 1.39        | -1.08      | -1.08        | -1.97      | -2.18        | -1.81      | -2.24        |
| 237969_at   | ---        | ---                  | 0                                    | ---     | 1.53          | -1.85           | 1.86      | -1.07       | -1.81     | -1.51       | -1.15      | 1.19         | -1.10      | 2.33         | 1.47       | 1.00         |
| 237973_at   | ---        | ---                  | 0                                    | ---     | 1.05          | -2.42           | -1.02     | -3.41       | 12.37     | 3.02        | -3.94      | 1.05         | 2.12       | -1.52        | 5.50       | 11.14        |
| 237983_at   | ---        | ---                  | 0                                    | ---     | 1.36          | 2.33            | -1.31     | 1.26        | -1.07     | 1.14        | -1.44      | -2.59        | 2.13       | 1.43         | 1.01       | -1.33        |
| 238038_at   | ---        | ---                  | 0                                    | ---     | 1.00          | 1.02            | 1.04      | -1.10       | 1.19      | 1.05        | -1.10      | -1.01        | -1.76      | -1.36        | -1.65      | -1.46        |
| 238040_at   | ---        | ---                  | 0                                    | ---     | -1.16         | -1.15           | 1.06      | 1.02        | 1.01      | 1.29        | -2.02      | -1.56        | -1.84      | -1.25        | -2.27      | -1.44        |
| 238052_at   | ---        | ---                  | 0                                    | ---     | -1.39         | 1.22            | -1.19     | -1.18       | -1.14     | -1.16       | 1.07       | 1.45         | -1.07      | 1.09         | -1.32      | -1.41        |
| 238098_at   | ---        | ---                  | 0                                    | ---     | 1.10          | 1.49            | 1.12      | 1.19        | 1.22      | 1.14        | -1.74      | -1.19        | -2.73      | -2.85        | -3.15      | -2.65        |
| 238099_at   | ---        | ---                  | 0                                    | ---     | -1.01         | -1.20           | -1.10     | 1.07        | -1.13     | -1.17       | 1.32       | 1.02         | -1.01      | 1.05         | -1.43      | -1.34        |
| 238109_at   | ---        | ---                  | 0                                    | ---     | 1.38          | 1.38            | -1.03     | -1.10       | -1.15     | 1.05        | -1.45      | -1.37        | -1.14      | -1.57        | -1.43      | -1.52        |
| 238119_at   | ---        | ---                  | 0                                    | ---     | 1.02          | 1.05            | 1.25      | -1.05       | -1.10     | 1.14        | -1.21      | -1.16        | -1.51      | -1.10        | -2.08      | -2.48        |
| 238133_at   | ---        | ---                  | 0                                    | ---     | -1.14         | 1.22            | 1.37      | 1.44        | 1.66      | -1.06       | -2.03      | 1.10         | -1.58      | -1.57        | -1.34      | -1.20        |
| 238134_at   | ---        | ---                  | 0                                    | ---     | 1.98          | 2.58            | 1.23      | -1.29       | 1.27      | 1.09        | 1.14       | 1.27         | -1.82      | -2.12        | -3.14      | -1.56        |
| 238144_s_at | ---        | ---                  | 0                                    | ---     | -1.70         | -1.85           | -1.22     | -1.06       | 1.54      | 1.24        | 1.12       | -1.02        | 2.81       | 3.26         | 2.98       | 2.81         |
| 238146_at   | ---        | ---                  | 0                                    | ---     | -1.01         | 1.08            | 1.36      | 1.17        | -1.27     | -1.03       | 1.12       | 1.29         | -1.38      | -1.26        | -1.73      | -1.59        |
| 238151_at   | ---        | ---                  | 0                                    | ---     | -1.08         | -1.22           | -1.07     | -1.23       | 1.07      | 1.22        | 1.56       | 1.68         | 2.75       | 2.76         | 2.41       | 2.98         |
| 238156_at   | ---        | ---                  | 0                                    | ---     | -1.15         | 1.01            | -1.05     | 1.08        | 1.22      | 1.33        | 1.01       | -1.19        | -1.41      | -1.24        | -1.59      | -1.58        |
| 238162_at   | ---        | ---                  | 0                                    | ---     | 4.00          | 4.45            | 1.46      | 1.51        | 1.07      | -1.17       | 1.84       | 1.82         | -1.41      | -1.07        | -2.52      | -1.91        |
| 238172_at   | ---        | ---                  | 0                                    | ---     | 1.43          | -1.49           | 1.04      | -1.09       | 1.25      | 1.35        | 1.48       | 1.31         | -1.78      | -1.62        | -1.79      | -1.51        |
| 238174_at   | ---        | ---                  | 0                                    | ---     | 1.56          | 1.56            | 1.34      | 1.37        | -1.34     | -1.09       | 1.10       | 1.20         | -2.87      | -2.02        | -1.11      | -1.54        |

| ID          | Gene Title | Chromosomal Location | 1st Gene Ontology Biological Process | Pathway                          | A2497 30 mins | A2497P' 30 mins | A2497 2 h | A2497P' 2 h | A2497 4 h | A2497P' 4 h | A2497 24 h | A2497P' 24 h | A2497 48 h | A2497P' 48 h | A2497 72 h | A2497P' 72 h |
|-------------|------------|----------------------|--------------------------------------|----------------------------------|---------------|-----------------|-----------|-------------|-----------|-------------|------------|--------------|------------|--------------|------------|--------------|
| 238178_at   | ---        | ---                  | 0                                    | ---                              | -1.33         | 1.13            | 1.06      | -1.06       | 1.45      | 1.45        | 1.08       | -2.01        | 1.78       | 1.29         | 2.21       | 1.59         |
| 238186_at   | ---        | ---                  | 0                                    | ---                              | -1.02         | 1.20            | 1.03      | -1.05       | -1.11     | -1.04       | -1.26      | -1.11        | -1.81      | -1.69        | -1.79      | -1.59        |
| 238191_at   | ---        | ---                  | 0                                    | ---                              | 1.23          | 1.21            | -1.04     | -1.12       | 1.03      | 1.02        | -1.05      | 1.08         | -1.77      | -1.48        | -1.67      | -1.83        |
| 238203_at   | ---        | ---                  | 0                                    | ---                              | 4.21          | 6.30            | -3.65     | -1.38       | -5.89     | -3.47       | 1.82       | 2.05         | 5.94       | 5.19         | 1.23       | 2.82         |
| 238212_at   | ---        | ---                  | 0                                    | ---                              | -3.24         | -1.34           | 1.57      | -2.27       | 3.15      | -2.72       | 3.38       | 2.23         | 32.39      | 20.69        | 1.61       | 1.22         |
| 238228_at   | ---        | ---                  | 0                                    | ---                              | -1.01         | -2.25           | -1.01     | 1.14        | 1.08      | 1.14        | 1.33       | -1.26        | 3.42       | 3.38         | 2.72       | 2.36         |
| 238256_at   | ---        | ---                  | 0                                    | ---                              | 1.06          | -1.09           | 1.25      | 1.31        | 1.04      | 1.13        | -1.04      | -1.11        | -1.70      | -3.06        | -4.76      | -5.00        |
| 238266_at   | ---        | ---                  | 0                                    | ---                              | -1.19         | 1.70            | 3.42      | 2.99        | 1.09      | -2.98       | 1.76       | -1.42        | 2.15       | 1.58         | 2.01       | 1.14         |
| 238271_x_at | ---        | ---                  | 0                                    | ---                              | -1.01         | -1.08           | 1.14      | 1.20        | -1.05     | 1.15        | -1.09      | -1.16        | -2.08      | -2.83        | -2.20      | -1.81        |
| 238303_at   | ---        | ---                  | 0                                    | ---                              | 1.37          | 1.21            | -1.04     | -1.02       | 1.13      | 1.18        | 1.17       | 1.17         | -1.74      | -1.98        | -2.03      | -1.81        |
| 238304_at   | ---        | ---                  | 0                                    | ---                              | -2.36         | -2.35           | -1.68     | 1.62        | 1.47      | -1.02       | -1.17      | -1.42        | -1.49      | 2.32         | -1.73      | -1.59        |
| 238317_x_at | ---        | ---                  | 0                                    | ---                              | 1.27          | 1.02            | 1.07      | 1.07        | -1.01     | 1.14        | -2.04      | 1.06         | -2.67      | -2.41        | -3.51      | -3.30        |
| 238341_at   | ---        | ---                  | 0                                    | ---                              | 2.33          | 1.56            | -1.12     | -1.72       | 1.17      | -1.12       | -1.43      | -1.10        | -1.50      | -2.31        | -1.51      | -1.48        |
| 238342_at   | ---        | ---                  | 0                                    | ---                              | -1.45         | -1.13           | 1.54      | 1.31        | 1.67      | -1.20       | -1.07      | -1.05        | -1.07      | -1.38        | -1.77      | -2.37        |
| 238344_at   | ---        | ---                  | 0                                    | ---                              | 1.88          | 2.28            | 1.24      | -2.42       | -2.12     | -1.35       | -1.42      | -2.18        | -1.31      | 1.35         | -1.69      | -1.28        |
| 238363_at   | ---        | ---                  | 0                                    | ---                              | -1.74         | -1.11           | -1.06     | -1.03       | -1.16     | 1.22        | -1.24      | -1.26        | -1.58      | -1.06        | -1.99      | -2.36        |
| 238371_s_at | ---        | ---                  | 0                                    | ---                              | -2.87         | -1.25           | -1.24     | 1.10        | -4.09     | -3.37       | 1.78       | -1.21        | 2.06       | 1.41         | -1.48      | -6.65        |
| 238378_at   | ---        | ---                  | 0                                    | ---                              | -1.44         | -1.08           | 1.03      | 1.31        | -1.37     | 1.63        | -1.24      | 1.27         | -2.44      | -1.35        | -3.09      | -2.70        |
| 238379_x_at | ---        | ---                  | 0                                    | ---                              | -1.03         | 1.11            | 2.52      | 2.07        | -1.39     | -2.32       | -1.78      | -1.07        | -5.76      | -2.11        | -2.48      | -2.38        |
| 238384_x_at | ---        | ---                  | 0                                    | ---                              | -1.25         | -1.10           | 1.42      | 6.26        | 1.96      | 3.16        | 1.55       | 4.31         | -1.10      | -6.08        | -1.61      | 1.20         |
| 238399_x_at | ---        | ---                  | 0                                    | ---                              | -2.25         | -1.28           | 1.23      | 2.52        | -2.22     | 1.14        | 35.35      | 6.71         | 6.63       | 14.97        | 1.91       | 2.79         |
| 238403_at   | ---        | ---                  | 0                                    | ---                              | 1.42          | -1.09           | -1.16     | -2.22       | 1.13      | -1.02       | -6.15      | -1.64        | 1.05       | 1.05         | 2.42       | -2.75        |
| 238431_at   | ---        | ---                  | 0                                    | ---                              | -1.04         | 1.03            | -1.03     | -1.10       | -1.13     | -1.05       | -1.40      | -1.11        | -1.58      | -1.31        | -1.63      | -1.63        |
| 238442_at   | ---        | ---                  | 0                                    | ---                              | -1.31         | -1.37           | 1.12      | 1.44        | -1.18     | -1.32       | 1.04       | 1.06         | -1.57      | -2.55        | -1.99      | -1.90        |
| 238455_at   | ---        | ---                  | 0                                    | ---                              | -1.05         | 1.03            | -1.10     | -1.50       | 1.08      | 1.18        | 1.03       | 1.04         | -1.52      | -1.53        | -3.08      | -2.78        |
| 238501_at   | ---        | ---                  | 0                                    | ---                              | -1.02         | -1.16           | 1.41      | 1.52        | -1.27     | -1.24       | 1.34       | 1.13         | -2.85      | -1.73        | -2.92      | -2.46        |
| 238512_at   | ---        | ---                  | 0                                    | ---                              | 2.54          | -1.21           | 1.37      | 1.50        | 4.62      | 4.03        | 1.24       | 1.47         | -1.36      | -1.34        | 3.11       | 2.22         |
| 238536_at   | ---        | ---                  | 0                                    | ---                              | -1.25         | -1.08           | 1.45      | -1.29       | 1.25      | -1.23       | -1.25      | 1.21         | -1.38      | -1.18        | -1.58      | -1.88        |
| 238544_at   | ---        | ---                  | 0                                    | ---                              | 1.37          | 1.12            | 1.49      | -1.54       | 1.33      | 1.28        | -1.02      | -1.33        | -3.20      | -3.25        | -3.15      | -2.54        |
| 238570_at   | ---        | ---                  | 0                                    | ---                              | -1.11         | -1.25           | 1.16      | 1.20        | -1.00     | 1.21        | -1.29      | -1.14        | -2.50      | -2.08        | -1.56      | -2.07        |
| 238586_at   | ---        | ---                  | 0                                    | ---                              | -1.30         | -2.00           | -1.82     | -1.42       | 1.59      | -1.16       | -1.12      | 1.14         | 3.21       | 1.70         | 1.05       | -2.27        |
| 238592_at   | ---        | ---                  | 0                                    | ---                              | 1.61          | 1.13            | 1.16      | -1.09       | -1.06     | 1.02        | -1.52      | -1.12        | -1.70      | -1.59        | -1.88      | -3.44        |
| 238604_at   | ---        | ---                  | 0                                    | ---                              | 1.29          | 1.30            | 1.03      | 1.06        | -1.02     | 1.08        | 1.09       | -2.06        | -1.51      | -2.62        | -2.70      | ---          |
| 238610_s_at | ---        | ---                  | 0                                    | ---                              | -1.02         | -1.13           | 1.05      | 1.06        | 1.43      | 1.14        | 1.20       | 1.24         | -1.35      | -1.58        | -1.38      | -1.38        |
| 238611_at   | ---        | ---                  | 0                                    | ---                              | 1.06          | 1.48            | 1.30      | 1.60        | -1.19     | -1.56       | -1.05      | -1.43        | -2.54      | -1.73        | -1.55      | -3.26        |
| 238619_at   | ---        | ---                  | 0                                    | ---                              | 1.29          | 1.43            | -1.11     | -1.38       | 1.19      | 1.21        | -1.16      | 1.14         | -1.09      | -1.05        | -1.90      | -1.66        |
| 238623_at   | ---        | ---                  | 0                                    | G13_Signaling_Pathway // GenMAPP | 1.11          | -1.18           | -1.19     | -1.20       | 1.14      | 1.02        | 1.09       | 1.14         | -3.68      | -2.22        | -1.80      | -1.60        |
| 238631_at   | ---        | ---                  | 0                                    | ---                              | -1.08         | -1.29           | -1.18     | 1.14        | 1.08      | -1.10       | -1.10      | 1.16         | -1.97      | -1.76        | -2.63      | -2.46        |
| 238634_x_at | ---        | ---                  | 0                                    | ---                              | 1.33          | 1.13            | -1.02     | 1.32        | 1.47      | 1.51        | -1.10      | 1.20         | -2.79      | -1.70        | -2.24      | -2.66        |
| 238652_at   | ---        | ---                  | 0                                    | ---                              | 1.02          | 1.12            | 1.02      | -1.28       | -1.03     | 1.10        | -1.18      | -1.08        | -2.06      | -1.91        | -1.22      | -1.35        |
| 238653_at   | ---        | ---                  | 0                                    | ---                              | 1.07          | 1.05            | 1.08      | 1.07        | 1.06      | 1.08        | -1.12      | -1.09        | -1.68      | -1.41        | -1.56      | -1.66        |
| 238656_at   | ---        | ---                  | 0                                    | ---                              | -1.01         | 1.00            | 1.11      | 1.23        | 1.09      | -1.08       | -1.28      | -1.15        | -1.87      | -1.98        | -1.94      | -1.71        |
| 238666_at   | ---        | ---                  | 0                                    | ---                              | -1.07         | -1.65           | 1.25      | 1.03        | 1.35      | 1.18        | -1.17      | 1.19         | 1.28       | 1.18         | 2.40       | 2.83         |
| 238667_at   | ---        | ---                  | 0                                    | ---                              | 2.81          | -1.13           | -1.81     | -2.31       | 1.24      | 3.08        | 1.69       | 1.89         | 3.25       | 2.44         | 2.12       | -1.22        |
| 238668_at   | ---        | ---                  | 0                                    | ---                              | -1.75         | -4.29           | -1.54     | -1.03       | -1.08     | 1.89        | 1.09       | 1.53         | 1.17       | -1.68        | -1.32      | -1.24        |
| 238672_at   | ---        | ---                  | 0                                    | ---                              | 1.19          | 1.34            | 1.04      | -1.28       | -1.30     | 1.31        | -1.68      | -1.21        | -1.65      | -1.02        | -1.52      | -1.44        |
| 238676_at   | ---        | ---                  | 0                                    | ---                              | 1.07          | -1.19           | 1.10      | 1.16        | 1.36      | 1.33        | -1.08      | 1.28         | -1.78      | -1.73        | -1.14      | -1.11        |
| 238696_at   | ---        | ---                  | 0                                    | ---                              | 1.16          | 1.29            | 1.13      | 1.12        | -1.02     | 1.13        | -1.07      | 1.03         | -1.11      | 1.22         | 1.14       | -1.09        |
| 238705_at   | ---        | ---                  | 0                                    | ---                              | -1.17         | -1.20           | 1.42      | 1.44        | -1.11     | 1.13        | -1.11      | -1.26        | -1.22      | -1.32        | -1.85      | -1.47        |
| 238712_at   | ---        | ---                  | 0                                    | ---                              | 1.26          | 1.23            | 1.02      | 1.04        | 1.20      | 1.20        | -1.08      | -1.14        | -2.35      | -2.76        | -2.15      | -1.82        |
| 238728_at   | ---        | ---                  | 0                                    | ---                              | 1.02          | -1.14           | 1.34      | 1.22        | 1.14      | 1.20        | -1.63      | -1.20        | -1.04      | -1.01        | 1.16       | 1.23         |
| 238733_at   | ---        | ---                  | 0                                    | ---                              | 1.08          | -1.41           | -1.35     | -1.26       | 1.02      | 1.07        | -1.21      | 1.18         | -1.39      | 1.00         | 1.56       | 1.73         |
| 238745_at   | ---        | ---                  | 0                                    | ---                              | 3.12          | 2.48            | -1.01     | 1.05        | 1.07      | 1.03        | 1.24       | 1.39         | -2.66      | -1.91        | -1.92      | -1.59        |
| 238758_at   | ---        | ---                  | 0                                    | ---                              | 1.28          | 1.11            | -1.17     | -1.02       | -1.04     | -1.10       | -1.14      | 1.09         | -3.25      | -2.95        | -2.83      | -2.53        |
| 238771_at   | ---        | ---                  | 0                                    | ---                              | 2.63          | 2.39            | -2.15     | 1.37        | -1.22     | -1.04       | 1.42       | -1.00        | -1.06      | -2.20        | -2.26      | -2.24        |
| 238774_at   | ---        | ---                  | 0                                    | ---                              | 1.20          | 1.27            | 1.08      | 1.02        | -1.01     | 1.31        | -1.52      | -1.19        | -2.05      | -1.64        | -2.08      | -1.86        |
| 238806_at   | ---        | ---                  | 0                                    | ---                              | -3.08         | -1.15           | 1.00      | 1.84        | -1.08     | 1.06        | 1.39       | 1.36         | -1.82      | -3.21        | -2.71      | -2.01        |
| 238822_at   | ---        | ---                  | 0                                    | ---                              | -1.05         | -1.11           | 1.02      | 1.10        | 1.15      | 1.07        | -1.17      | 1.04         | -1.57      | -1.36        | -1.61      | -1.33        |
| 238824_at   | ---        | ---                  | 0                                    | ---                              | -1.32         | 1.14            | 1.28      | 1.23        | 1.08      | 1.02        | 1.00       | 1.25         | -1.79      | -1.23        | -1.65      | -1.56        |
| 238826_x_at | ---        | ---                  | 0                                    | ---                              | -1.33         | -1.07           | 1.74      | 1.39        | -1.19     | 1.00        | -1.35      | -1.08        | -1.21      | -1.06        | -1.52      | -1.96        |
| 238829_at   | ---        | ---                  | 0                                    | ---                              | 1.05          | 1.08            | 1.01      | -1.04       | -1.10     | -1.02       | -1.22      | 1.09         | -2.26      | -2.21        | -2.38      | -2.53        |
| 238830_at   | ---        | ---                  | 0                                    | ---                              | -1.43         | -1.02           | -1.97     | -2.45       | -1.34     | -1.23       | -1.50      | -2.73        | 2.69       | 1.68         | -1.28      | -1.83        |
| 238833_at   | ---        | ---                  | 0                                    | ---                              | -1.03         | -1.17           | 1.21      | 1.30        | 1.01      | 1.02        | -1.02      | 1.25         | -2.68      | -2.16        | -2.64      | -2.68        |
| 238842_at   | ---        | ---                  | 0                                    | ---                              | -1.11         | -1.07           | 1.07      | 1.03        | 1.10      | -1.01       | -1.17      | -1.09        | -1.35      | -1.41        | -1.48      | -1.49        |
| 238882_at   | ---        | ---                  | 0                                    | ---                              | -1.33         | -1.21           | 1.02      | 1.02        | -1.01     | 1.07        | -1.50      | -1.64        | 1.44       | 1.05         | -3.41      | -2.77        |
| 238892_at   | ---        | ---                  | 0                                    | ---                              | 1.23          | 1.09            | -1.09     | 1.03        | 1.25      | 1.27        | -1.04      | 1.02         | -1.81      | -2.11        | -1.72      | -1.96        |

| ID          | Gene Title | Chromosomal Location | 1st Gene Ontology Biological Process | Pathway | A2497 30 mins | A2497P' 30 mins | A2497 2 h | A2497P' 2 h | A2497 4 h | A2497P' 4 h | A2497 24 h | A2497P' 24 h | A2497 48 h | A2497P' 48 h | A2497 72 h | A2497P' 72 h |
|-------------|------------|----------------------|--------------------------------------|---------|---------------|-----------------|-----------|-------------|-----------|-------------|------------|--------------|------------|--------------|------------|--------------|
| 238902_at   | ---        | ---                  | 0                                    | ---     | 1.89          | 1.31            | 1.22      | 1.22        | -1.26     | -1.02       | -1.57      | -1.45        | -1.96      | -1.84        | -1.83      | -2.42        |
| 238918_at   | ---        | ---                  | 0                                    | ---     | 1.93          | 1.33            | 1.06      | -1.19       | -1.11     | 1.40        | 1.28       | 1.17         | -3.51      | -2.74        | -2.17      | -1.59        |
| 238920_at   | ---        | ---                  | 0                                    | ---     | -1.17         | -1.61           | 1.30      | 1.60        | 1.09      | -1.10       | -1.03      | 1.19         | -1.11      | -1.06        | -1.27      | -1.37        |
| 238928_at   | ---        | ---                  | 0                                    | ---     | 1.32          | 2.05            | 1.79      | 2.00        | 7.46      | 6.74        | 1.08       | 1.07         | 4.05       | 3.20         | 10.02      | 4.84         |
| 238967_at   | ---        | ---                  | 0                                    | ---     | 1.25          | -1.12           | -1.17     | -1.08       | 1.04      | 1.57        | 1.63       | 1.64         | 1.68       | 1.28         | -1.03      | -1.09        |
| 238970_at   | ---        | ---                  | 0                                    | ---     | -1.00         | -1.18           | 1.41      | -1.04       | -1.68     | -1.21       | -1.71      | -1.02        | -1.76      | -1.53        | -1.81      | -5.80        |
| 238971_at   | ---        | ---                  | 0                                    | ---     | 1.00          | 1.30            | -1.21     | -1.14       | 1.05      | -1.02       | 1.16       | 1.01         | 1.05       | -1.05        | -2.51      | -1.39        |
| 238973_s_at | ---        | ---                  | 0                                    | ---     | -1.05         | -1.07           | 1.03      | 1.04        | -1.03     | -1.12       | 1.08       | 1.14         | 1.40       | 1.22         | 1.70       | 1.79         |
| 238979_at   | ---        | ---                  | 0                                    | ---     | 1.18          | -1.06           | 1.06      | -1.18       | 1.10      | -1.13       | -1.12      | 1.14         | -1.67      | -1.44        | -1.09      | -1.53        |
| 239003_at   | ---        | ---                  | 0                                    | ---     | 1.29          | 1.18            | 1.14      | -1.12       | -1.06     | 1.15        | -1.01      | -1.32        | 1.39       | 1.11         | -1.08      | -1.44        |
| 239016_at   | ---        | ---                  | 0                                    | ---     | 1.11          | -1.11           | -1.50     | -1.55       | 1.44      | -1.25       | -2.97      | -1.21        | -3.72      | -3.76        | -5.31      | -5.75        |
| 239022_at   | ---        | ---                  | 0                                    | ---     | 1.26          | 1.64            | 1.06      | -1.25       | 1.04      | 1.22        | -1.02      | -1.34        | -1.69      | -1.48        | -1.40      | -1.29        |
| 239039_at   | ---        | ---                  | 0                                    | ---     | 1.04          | -1.17           | 2.59      | 1.72        | -1.25     | -1.26       | -1.02      | 1.06         | -1.76      | -1.58        | -1.93      | -4.47        |
| 239045_at   | ---        | ---                  | 0                                    | ---     | 3.09          | -1.08           | -1.35     | -1.05       | 1.13      | 1.25        | 1.28       | 1.67         | -1.08      | 1.16         | 1.18       | -1.07        |
| 239049_at   | ---        | ---                  | 0                                    | ---     | -1.01         | -1.34           | 1.12      | -1.04       | -1.58     | 1.03        | -1.65      | -1.38        | -1.35      | -1.55        | -1.82      | -1.86        |
| 239050_s_at | ---        | ---                  | 0                                    | ---     | 1.10          | -1.06           | -1.08     | 1.22        | -1.02     | 1.18        | -1.24      | -1.06        | -1.66      | -1.62        | -1.72      | -1.60        |
| 239055_at   | ---        | ---                  | 0                                    | ---     | -1.04         | 1.14            | 1.14      | 1.02        | -1.28     | -1.08       | 1.17       | -1.02        | 1.50       | 1.67         | 1.37       | 1.32         |
| 239070_at   | ---        | ---                  | 0                                    | ---     | 1.19          | 1.36            | 1.09      | 1.23        | 1.27      | -1.08       | -1.41      | -1.16        | -1.49      | -1.44        | -1.54      | -1.79        |
| 239081_at   | ---        | ---                  | 0                                    | ---     | 1.61          | 1.39            | -1.31     | 1.26        | -1.11     | 1.29        | 1.13       | 1.39         | 1.62       | 1.32         | 1.30       | 1.02         |
| 239086_at   | ---        | ---                  | 0                                    | ---     | 1.27          | 1.29            | -1.02     | 1.07        | 1.37      | 1.33        | -1.15      | 1.19         | -2.15      | -2.70        | -2.27      | -1.82        |
| 239091_at   | ---        | ---                  | 0                                    | ---     | -1.08         | 1.12            | 1.13      | 1.22        | 1.18      | 1.34        | 1.00       | 1.02         | -1.76      | -1.34        | -1.81      | -1.30        |
| 239105_at   | ---        | ---                  | 0                                    | ---     | 1.09          | -1.05           | 1.13      | 1.21        | -1.30     | 1.35        | 1.65       | 2.22         | -3.97      | -2.82        | -8.89      | -3.40        |
| 239110_s_at | ---        | ---                  | 0                                    | ---     | -1.29         | -1.42           | -1.31     | -1.19       | 1.60      | 1.11        | -1.07      | -1.46        | -1.66      | -1.33        | -1.56      | -1.68        |
| 239121_at   | ---        | ---                  | 0                                    | ---     | 1.25          | 1.20            | -1.47     | -1.24       | 1.14      | -1.19       | 1.61       | 1.25         | -1.83      | -1.38        | -1.83      | -1.40        |
| 239122_at   | ---        | ---                  | 0                                    | ---     | 1.21          | 1.20            | 1.98      | 2.72        | -1.11     | 1.20        | 1.87       | 2.46         | 1.52       | -1.70        | 3.77       | 3.28         |
| 239134_at   | ---        | ---                  | 0                                    | ---     | -1.26         | -1.04           | -1.14     | -1.30       | -1.04     | -1.03       | 1.21       | 1.33         | -3.83      | -3.25        | -2.69      | -2.52        |
| 239149_at   | ---        | ---                  | 0                                    | ---     | -1.02         | -1.12           | 1.44      | -1.29       | 1.17      | 1.42        | 1.05       | 1.23         | 2.15       | 1.47         | 2.03       | 1.77         |
| 239154_at   | ---        | ---                  | 0                                    | ---     | 1.28          | 1.20            | -1.03     | -1.06       | -1.09     | -1.07       | -1.02      | -1.02        | -3.28      | -2.64        | -4.43      | -3.79        |
| 239176_at   | ---        | ---                  | 0                                    | ---     | -1.49         | -1.19           | -1.09     | 2.45        | -3.13     | -1.02       | -2.08      | 1.72         | 2.02       | 1.65         | -1.07      | 1.17         |
| 239199_at   | ---        | ---                  | 0                                    | ---     | 1.22          | 1.07            | 1.45      | 1.19        | -1.09     | -1.46       | -1.06      | -1.06        | -1.28      | -1.65        | -2.63      | -1.88        |
| 239225_at   | ---        | ---                  | 0                                    | ---     | -1.09         | -1.21           | 1.08      | 1.08        | -1.16     | 1.02        | -1.22      | -1.05        | -1.59      | -1.37        | -1.14      | -1.03        |
| 239226_at   | ---        | ---                  | 0                                    | ---     | -2.00         | 1.45            | 1.08      | -1.52       | -2.28     | -1.44       | 3.17       | 3.62         | -1.95      | -2.53        | -1.80      | -1.41        |
| 239236_at   | ---        | ---                  | 0                                    | ---     | 1.10          | 1.12            | -1.09     | 1.07        | 1.08      | 1.09        | -1.40      | 1.01         | -2.82      | -2.59        | -3.74      | -3.27        |
| 239238_at   | ---        | ---                  | 0                                    | ---     | -1.07         | 1.84            | -1.01     | 1.03        | 1.54      | 1.49        | -1.35      | -1.32        | -1.89      | -1.51        | -2.37      | -3.32        |
| 239240_at   | ---        | ---                  | 0                                    | ---     | -1.07         | -1.26           | 1.38      | 1.65        | -1.00     | 1.07        | 1.13       | 1.01         | -2.30      | -1.94        | -1.82      | -1.75        |
| 239253_at   | ---        | ---                  | 0                                    | ---     | 1.19          | 1.46            | 1.16      | 1.11        | 1.58      | 1.33        | -2.10      | -1.40        | -1.63      | -1.58        | -2.80      | -1.96        |
| 239264_at   | ---        | ---                  | 0                                    | ---     | 1.26          | 1.16            | 1.04      | -1.04       | 1.35      | 1.31        | 1.16       | -1.30        | -2.57      | -2.05        | -2.36      | -2.23        |
| 239277_at   | ---        | ---                  | 0                                    | ---     | 1.11          | 1.11            | 1.02      | -1.09       | -1.11     | -1.03       | -1.22      | -1.02        | -1.62      | -1.89        | -1.38      | -1.48        |
| 239278_at   | ---        | ---                  | 0                                    | ---     | 1.23          | -1.03           | 1.99      | 1.52        | 1.04      | 1.11        | 1.28       | 1.18         | -1.75      | -1.29        | -2.22      | -2.39        |
| 239280_at   | ---        | ---                  | 0                                    | ---     | -1.23         | -1.01           | 1.05      | 1.28        | 1.07      | 1.24        | -1.15      | -1.05        | -1.36      | -1.14        | -1.75      | -1.25        |
| 239292_at   | ---        | ---                  | 0                                    | ---     | 1.00          | -1.14           | -1.13     | -1.15       | 1.02      | 1.12        | -1.15      | 1.05         | -1.49      | -1.26        | -1.57      | -1.50        |
| 239306_at   | ---        | ---                  | 0                                    | ---     | -1.41         | -1.18           | -2.10     | -1.63       | 1.75      | 1.13        | -1.25      | -1.59        | -4.19      | -3.31        | -14.32     | -7.44        |
| 239310_at   | ---        | ---                  | 0                                    | ---     | -1.47         | -1.11           | 1.34      | 1.08        | 1.12      | 1.13        | -2.34      | -1.53        | -2.17      | -1.02        | 1.14       | 1.54         |
| 239324_at   | ---        | ---                  | 0                                    | ---     | -1.12         | -1.18           | 1.11      | 1.02        | -1.01     | -1.06       | 1.08       | -1.03        | 1.28       | 1.52         | 1.38       | 1.59         |
| 239331_at   | ---        | ---                  | 0                                    | ---     | 1.58          | 1.42            | -1.04     | -1.21       | -1.10     | 1.09        | 1.05       | 1.04         | -2.54      | -2.39        | -1.28      | -1.56        |
| 239333_x_at | ---        | ---                  | 0                                    | ---     | 1.05          | -1.14           | -1.00     | 1.05        | -1.14     | -1.00       | -1.10      | 1.04         | -1.61      | -1.32        | -2.08      | -2.50        |
| 239334_at   | ---        | ---                  | 0                                    | ---     | 1.04          | 1.07            | 1.08      | 1.20        | 1.21      | 1.03        | 2.10       | 1.19         | 4.24       | 4.34         | 3.72       | 4.15         |
| 239339_at   | ---        | ---                  | 0                                    | ---     | 1.19          | -1.01           | -1.11     | -1.10       | 1.08      | 1.02        | -1.07      | 1.01         | -1.48      | -1.20        | -1.20      | -1.18        |
| 239341_at   | ---        | ---                  | 0                                    | ---     | -1.00         | 1.23            | 1.28      | 1.03        | -1.04     | -1.19       | 1.03       | -1.09        | -1.21      | 1.08         | 1.82       | 1.46         |
| 239348_at   | ---        | ---                  | 0                                    | ---     | 1.33          | 1.12            | -1.00     | -1.06       | -1.00     | 1.19        | -1.46      | -1.55        | -2.82      | -2.91        | -1.85      | -1.92        |
| 239354_at   | ---        | ---                  | 0                                    | ---     | 1.19          | -1.02           | 1.42      | 1.27        | 1.17      | -1.04       | -1.55      | -1.43        | -2.35      | -3.13        | -7.10      | -4.84        |
| 239358_at   | ---        | ---                  | 0                                    | ---     | 1.83          | 1.28            | 1.26      | -1.04       | 1.17      | -1.15       | -1.07      | -1.07        | 3.66       | 2.94         | 6.28       | 7.83         |
| 239361_at   | ---        | ---                  | 0                                    | ---     | 1.17          | 1.20            | 1.10      | -1.13       | 1.41      | 1.36        | 1.05       | 1.21         | -4.10      | -3.99        | -4.04      | -2.18        |
| 239372_at   | ---        | ---                  | 0                                    | ---     | -1.13         | 1.04            | 1.09      | 1.33        | -1.18     | -1.03       | 1.44       | 1.38         | 1.23       | 1.11         | 2.10       | 2.40         |
| 239375_at   | ---        | ---                  | 0                                    | ---     | 1.13          | -1.11           | 1.17      | 1.26        | -1.08     | -1.20       | 1.82       | 1.11         | 2.49       | 2.43         | -1.13      | 1.38         |
| 239410_at   | ---        | ---                  | 0                                    | ---     | -1.42         | -1.60           | -1.13     | 1.27        | 1.26      | -1.03       | -1.02      | 1.54         | -2.19      | -3.78        | -4.88      | -3.93        |
| 239411_at   | ---        | ---                  | 0                                    | ---     | 1.20          | 1.40            | 1.02      | 1.07        | 1.05      | -1.24       | -1.18      | -1.29        | -2.33      | -2.10        | -1.41      | -1.33        |
| 239437_at   | ---        | ---                  | 0                                    | ---     | 1.12          | -1.04           | 1.15      | 1.08        | -1.02     | 1.08        | -1.41      | -1.12        | -1.07      | 1.20         | 1.20       | 1.25         |
| 239448_at   | ---        | ---                  | 0                                    | ---     | -1.10         | -1.47           | 1.12      | -1.19       | 1.41      | 1.57        | -1.52      | 1.29         | -1.70      | -2.09        | -2.39      | -2.26        |
| 239449_at   | ---        | ---                  | 0                                    | ---     | 1.04          | -1.09           | 1.00      | -1.07       | 1.06      | 1.44        | 1.24       | 1.07         | -2.48      | -1.86        | -2.11      | -2.58        |
| 239453_at   | ---        | ---                  | 0                                    | ---     | -1.15         | 2.24            | 3.15      | 1.66        | 1.21      | 1.45        | 1.28       | 1.28         | -2.82      | -1.49        | -2.24      | -1.15        |
| 239464_at   | ---        | ---                  | 0                                    | ---     | 2.34          | 3.99            | 1.69      | -2.67       | 1.50      | 1.66        | -1.43      | -1.16        | 1.17       | 1.16         | -2.83      | -1.34        |
| 239474_at   | ---        | ---                  | 0                                    | ---     | -1.03         | -1.07           | -1.01     | 1.25        | 1.15      | 1.00        | 1.26       | 1.26         | 2.75       | 2.87         | 1.71       | 1.96         |
| 239476_at   | ---        | ---                  | 0                                    | ---     | 1.04          | 1.04            | 1.37      | 1.23        | 1.27      | 1.14        | -1.10      | 1.07         | -1.34      | -1.44        | -3.00      | -1.58        |
| 239494_at   | ---        | ---                  | 0                                    | ---     | -1.29         | 1.14            | 1.16      | 1.28        | -1.09     | 1.04        | -2.07      | -1.13        | -1.32      | -1.67        | -1.51      | 1.17         |
| 239496_at   | ---        | ---                  | 0                                    | ---     | 1.30          | -1.29           | 1.18      | -1.16       | 1.37      | 1.31        | 1.47       | 1.52         | -2.08      | -1.73        | -2.17      | -1.54        |

| ID          | Gene Title | Chromosomal Location | 1st Gene Ontology Biological Process | Pathway | A2497 30 mins | A2497P' 30 mins | A2497 2 h | A2497P' 2 h | A2497 4 h | A2497P' 4 h | A2497 24 h | A2497P' 24 h | A2497 48 h | A2497P' 48 h | A2497 72 h | A2497P' 72 h |
|-------------|------------|----------------------|--------------------------------------|---------|---------------|-----------------|-----------|-------------|-----------|-------------|------------|--------------|------------|--------------|------------|--------------|
| 239497_at   | ---        | ---                  | 0                                    | ---     | 5.79          | 2.88            | 1.66      | 1.58        | -1.08     | 1.16        | -1.69      | -3.10        | 4.16       | 1.59         | -2.31      | 1.33         |
| 239501_at   | ---        | ---                  | 0                                    | ---     | -1.10         | -1.07           | 1.10      | -1.02       | 1.03      | 1.39        | -1.47      | -1.32        | -2.61      | -1.26        | -3.85      | -2.42        |
| 239516_at   | ---        | ---                  | 0                                    | ---     | 1.04          | 1.14            | -1.19     | -1.30       | 1.21      | 1.13        | -1.13      | 1.06         | -3.46      | -2.14        | -2.65      | -1.49        |
| 239531_at   | ---        | ---                  | 0                                    | ---     | 1.20          | -1.24           | -1.07     | -1.07       | 1.27      | 1.28        | 1.40       | 1.02         | 1.31       | 1.15         | 1.65       | 1.98         |
| 239534_at   | ---        | ---                  | 0                                    | ---     | 1.01          | 1.03            | 1.21      | 1.02        | -1.20     | -1.01       | -1.00      | 1.30         | -1.25      | -1.41        | -1.48      | -1.19        |
| 239535_at   | ---        | ---                  | 0                                    | ---     | 1.07          | 1.51            | -1.19     | 1.11        | -1.27     | -1.32       | 1.40       | 1.12         | 2.27       | 1.41         | 1.77       | 1.31         |
| 239536_at   | ---        | ---                  | 0                                    | ---     | 1.12          | -1.04           | -1.25     | -1.13       | -1.05     | 1.10        | 1.11       | -1.09        | -1.66      | -1.01        | -2.17      | -2.61        |
| 239540_at   | ---        | ---                  | 0                                    | ---     | 1.29          | 1.29            | -1.12     | -1.07       | 1.03      | -1.09       | -1.12      | -1.05        | -1.52      | -1.49        | -1.90      | -7.13        |
| 239559_at   | ---        | ---                  | 0                                    | ---     | 1.11          | -1.28           | 1.60      | 1.35        | 1.05      | 1.24        | -1.26      | -1.17        | -1.26      | -1.40        | -1.04      | -1.09        |
| 239566_at   | ---        | ---                  | 0                                    | ---     | 2.14          | 4.05            | -1.54     | -1.02       | -2.82     | -1.06       | 1.35       | -3.10        | -1.53      | 1.10         | 1.23       | -2.83        |
| 239571_at   | ---        | ---                  | 0                                    | ---     | 1.15          | 1.08            | 1.20      | 1.19        | 1.23      | 1.15        | -1.15      | 1.18         | -2.00      | -1.22        | -1.90      | -1.33        |
| 239574_at   | ---        | ---                  | 0                                    | ---     | -1.05         | -1.06           | -1.06     | 1.12        | 1.08      | -1.13       | 1.01       | 1.04         | -1.39      | -1.36        | -4.12      | -3.96        |
| 239577_at   | ---        | ---                  | 0                                    | ---     | 1.81          | 1.27            | 1.07      | 1.16        | 1.06      | 1.15        | -1.55      | -1.04        | -3.09      | -3.35        | -3.77      | -3.72        |
| 239585_at   | ---        | ---                  | 0                                    | ---     | 1.23          | 1.31            | -1.05     | -1.38       | 1.11      | 1.15        | 1.18       | 1.06         | -2.75      | -2.62        | -1.69      | -2.33        |
| 239587_at   | ---        | ---                  | 0                                    | ---     | 1.04          | 1.18            | -1.15     | -1.24       | 1.05      | 1.03        | -1.11      | 1.14         | -2.41      | -1.64        | -2.03      | -2.30        |
| 239592_at   | ---        | ---                  | 0                                    | ---     | 1.08          | -1.75           | 1.27      | 1.11        | 1.21      | 1.27        | 1.04       | 1.29         | 1.13       | 1.35         | -1.33      | 1.90         |
| 239597_at   | ---        | ---                  | 0                                    | ---     | -1.85         | -1.22           | 1.39      | 1.15        | 1.13      | -1.01       | 1.72       | 1.07         | -2.50      | -1.86        | -1.82      | -2.28        |
| 239600_at   | ---        | ---                  | 0                                    | ---     | 1.48          | 1.31            | 1.07      | 1.18        | 1.23      | 1.19        | -1.06      | -1.03        | -2.50      | -2.91        | -2.57      | -2.30        |
| 239610_at   | ---        | ---                  | 0                                    | ---     | 3.19          | 2.94            | -1.14     | -1.16       | -1.01     | -1.12       | -2.33      | 1.16         | -5.11      | -1.95        | -1.74      | -3.38        |
| 239621_at   | ---        | ---                  | 0                                    | ---     | 1.34          | -1.09           | -2.34     | -1.17       | -1.38     | 1.07        | -1.34      | 1.16         | -2.31      | 2.62         | 1.87       | 2.53         |
| 239624_at   | ---        | ---                  | 0                                    | ---     | 1.55          | 1.48            | 1.02      | -1.12       | 1.00      | 1.05        | 1.11       | 1.54         | -1.03      | -1.27        | -2.47      | -3.26        |
| 239630_at   | ---        | ---                  | 0                                    | ---     | 1.32          | 1.21            | -1.22     | -1.05       | 1.05      | 1.11        | 1.01       | 1.33         | -3.24      | -2.42        | -2.54      | -2.65        |
| 239634_at   | ---        | ---                  | 0                                    | ---     | -1.24         | -1.56           | 1.11      | 1.39        | 1.57      | -1.96       | 1.58       | 4.27         | 1.46       | 4.45         | 3.14       | 1.50         |
| 239646_at   | ---        | ---                  | 0                                    | ---     | -1.10         | -1.16           | -1.32     | 1.19        | -1.75     | -1.60       | -2.74      | -2.64        | -2.23      | -2.66        | -1.41      | -1.32        |
| 239652_at   | ---        | ---                  | 0                                    | ---     | 1.07          | -1.17           | 1.20      | 1.28        | 1.13      | 1.25        | 1.28       | -1.00        | 1.06       | 1.00         | 2.88       | 2.78         |
| 239659_at   | ---        | ---                  | 0                                    | ---     | -1.08         | -1.17           | 1.11      | -1.13       | 1.06      | -1.30       | 1.13       | 1.38         | 1.26       | -1.06        | 2.31       | 1.46         |
| 239661_at   | ---        | ---                  | 0                                    | ---     | 1.35          | 1.18            | -1.05     | -1.13       | -1.19     | 1.14        | 1.20       | -1.03        | -2.74      | -2.42        | -1.85      | -1.96        |
| 239668_at   | ---        | ---                  | 0                                    | ---     | 1.14          | 1.59            | -1.13     | 1.06        | -1.34     | -1.13       | -1.67      | 1.00         | 1.38       | 1.50         | 4.40       | 3.51         |
| 239672_at   | ---        | ---                  | 0                                    | ---     | 1.68          | 1.26            | -1.05     | 1.02        | 1.81      | 1.61        | 1.08       | 1.12         | -4.20      | -3.71        | -2.65      | -2.53        |
| 239673_at   | ---        | ---                  | 0                                    | ---     | -1.07         | -1.21           | -1.10     | -1.06       | -1.06     | -1.03       | 1.03       | -1.15        | -3.91      | -2.77        | -3.19      | -1.75        |
| 239679_at   | ---        | ---                  | 0                                    | ---     | 1.25          | 1.39            | -1.04     | 1.07        | -1.28     | 1.51        | -1.10      | -1.07        | -2.26      | -1.83        | -2.22      | -2.67        |
| 239698_at   | ---        | ---                  | 0                                    | ---     | -1.47         | -1.42           | -1.01     | -1.16       | -1.08     | 1.67        | -1.09      | -1.02        | -1.25      | -1.22        | -1.71      | -1.66        |
| 239706_x_at | ---        | ---                  | 0                                    | ---     | 1.59          | 1.51            | -1.08     | -1.01       | -1.80     | -1.47       | -2.56      | -1.40        | -1.54      | -1.37        | 17.91      | 14.25        |
| 239714_at   | ---        | ---                  | 0                                    | ---     | 1.10          | 1.27            | 1.44      | 1.27        | 1.00      | -1.04       | 1.27       | 1.06         | -1.68      | -2.25        | -1.81      | -2.07        |
| 239724_at   | ---        | ---                  | 0                                    | ---     | 1.50          | 1.02            | 1.02      | -1.35       | 1.25      | 1.43        | 1.39       | 1.34         | -2.27      | -4.14        | 1.30       | -1.12        |
| 239731_at   | ---        | ---                  | 0                                    | ---     | 1.25          | 1.18            | 1.11      | 1.03        | 1.10      | 1.15        | -1.21      | -1.48        | -3.81      | -2.69        | -3.47      | -2.21        |
| 239734_at   | ---        | ---                  | 0                                    | ---     | 1.58          | 1.29            | 1.12      | 1.15        | 1.04      | 1.07        | -1.39      | -1.12        | -2.03      | -1.60        | -2.21      | -3.08        |
| 239735_at   | ---        | ---                  | 0                                    | ---     | 1.39          | 1.10            | 1.08      | -1.01       | 1.18      | 1.89        | -1.21      | -1.11        | -2.81      | -1.52        | -2.12      | -1.47        |
| 239744_at   | ---        | ---                  | 0                                    | ---     | -1.04         | -1.25           | 1.27      | 1.15        | 1.13      | 1.28        | -1.76      | -1.26        | -1.01      | -1.23        | 1.31       | 1.32         |
| 239769_at   | ---        | ---                  | 0                                    | ---     | 1.14          | 1.22            | -8.64     | -1.11       | 1.57      | 1.04        | -3.46      | -1.41        | 3.80       | -2.18        | 2.16       | 2.49         |
| 239783_at   | ---        | ---                  | 0                                    | ---     | -1.07         | -1.19           | 1.08      | -1.00       | 1.70      | 1.49        | -1.10      | -1.09        | -1.05      | 1.03         | -2.40      | -1.59        |
| 239784_at   | ---        | ---                  | 0                                    | ---     | 1.35          | 1.12            | 1.08      | 1.01        | 1.13      | 1.21        | -1.03      | 1.09         | -1.63      | -2.24        | -2.33      | -2.22        |
| 239786_at   | ---        | ---                  | 0                                    | ---     | -1.69         | -1.41           | 1.01      | 4.27        | -1.03     | 3.57        | -1.19      | -2.10        | -1.77      | 1.64         | -3.06      | -2.15        |
| 239790_s_at | ---        | ---                  | 0                                    | ---     | 1.01          | 1.05            | -1.00     | -1.14       | -1.02     | 1.05        | -1.05      | -1.02        | -1.45      | -1.44        | -1.19      | -1.39        |
| 239794_at   | ---        | ---                  | 0                                    | ---     | 1.01          | -1.26           | 1.19      | 1.34        | 1.11      | 1.11        | 1.08       | -1.06        | -2.59      | -2.10        | -1.38      | -1.27        |
| 239797_at   | ---        | ---                  | 0                                    | ---     | 1.03          | -1.00           | 1.05      | 1.41        | 1.10      | 1.13        | -1.07      | 1.08         | 1.59       | 1.55         | 1.63       | 1.71         |
| 239809_at   | ---        | ---                  | 0                                    | ---     | 1.22          | 1.44            | -1.01     | -1.03       | 1.63      | 1.47        | -1.08      | 1.04         | -2.94      | -2.30        | -1.63      | -2.40        |
| 239815_at   | ---        | ---                  | 0                                    | ---     | 1.07          | 1.04            | 1.36      | 1.27        | -1.07     | -1.14       | -1.37      | -1.44        | -1.94      | -2.02        | -2.20      | -2.61        |
| 239820_at   | ---        | ---                  | 0                                    | ---     | 1.10          | -1.00           | 2.05      | 2.21        | 1.79      | -1.17       | 1.59       | 1.09         | 1.34       | 1.84         | 1.14       | 1.04         |
| 239833_at   | ---        | ---                  | 0                                    | ---     | 1.08          | -1.04           | -1.28     | -1.15       | 1.41      | 1.18        | 1.02       | 1.04         | -2.61      | -1.63        | -2.66      | -2.78        |
| 239834_at   | ---        | ---                  | 0                                    | ---     | -1.11         | -1.02           | 1.08      | 1.22        | 1.14      | 1.25        | -1.38      | -1.11        | -2.90      | -2.55        | -2.41      | -2.33        |
| 239851_at   | ---        | ---                  | 0                                    | ---     | -1.16         | 1.68            | -1.03     | 1.75        | 1.21      | 1.26        | 1.30       | 1.54         | 4.48       | 2.16         | 1.04       | -2.29        |
| 239856_at   | ---        | ---                  | 0                                    | ---     | -1.28         | -2.09           | 1.47      | 1.67        | -1.14     | 1.18        | -1.07      | -2.36        | -1.92      | -2.36        | -1.25      | -2.21        |
| 239857_at   | ---        | ---                  | 0                                    | ---     | -1.01         | -1.03           | 1.00      | 1.02        | -1.14     | -1.08       | -1.07      | 1.19         | -1.06      | -1.02        | -1.51      | -1.56        |
| 239866_at   | ---        | ---                  | 0                                    | ---     | -1.25         | -1.33           | -1.12     | -1.00       | -1.17     | -1.37       | -1.34      | -1.13        | -1.94      | -2.02        | 1.16       | 1.25         |
| 239867_at   | ---        | ---                  | 0                                    | ---     | 1.05          | 1.23            | 1.20      | -1.16       | 1.57      | 2.21        | -1.10      | -1.26        | -1.36      | -2.58        | -1.90      | -2.34        |
| 239876_at   | ---        | ---                  | 0                                    | ---     | 2.23          | 1.82            | -1.17     | 1.35        | -1.05     | 1.04        | -1.05      | -1.09        | -1.44      | -1.94        | -2.53      | -1.25        |
| 239904_at   | ---        | ---                  | 0                                    | ---     | -4.55         | 3.14            | 1.54      | -1.61       | -1.35     | -1.18       | -3.07      | -1.93        | -1.51      | 1.56         | -1.24      | 1.20         |
| 239906_at   | ---        | ---                  | 0                                    | ---     | 1.66          | -1.29           | -1.72     | -1.69       | -2.54     | -1.41       | -1.45      | -1.94        | 3.89       | 2.19         | -1.82      | 1.21         |
| 239914_at   | ---        | ---                  | 0                                    | ---     | -1.00         | -1.07           | 1.32      | 1.27        | -1.48     | -1.15       | 1.10       | 1.37         | -1.70      | -1.64        | -1.69      | -2.22        |
| 239934_x_at | ---        | ---                  | 0                                    | ---     | 1.07          | -1.09           | -1.04     | 1.27        | 1.01      | 1.06        | -1.07      | 1.17         | -2.90      | -2.09        | -2.67      | -2.09        |
| 239942_at   | ---        | ---                  | 0                                    | ---     | 1.13          | 1.17            | 1.28      | 1.06        | -1.28     | 1.03        | -1.57      | -1.02        | -3.75      | -3.41        | -18.00     | -5.86        |
| 239946_at   | ---        | ---                  | 0                                    | ---     | 2.36          | 1.28            | 1.08      | 1.20        | 1.24      | 1.17        | 1.13       | -1.19        | -1.38      | -1.46        | -2.15      | -2.26        |
| 239951_at   | ---        | ---                  | 0                                    | ---     | -1.78         | 1.18            | -1.48     | -1.21       | 1.30      | 1.81        | 2.97       | 3.15         | 3.26       | 1.71         | -1.18      | 2.07         |
| 239955_at   | ---        | ---                  | 0                                    | ---     | 1.29          | 1.14            | 1.21      | 1.03        | 1.46      | 1.15        | 1.14       | 1.02         | -2.83      | -3.68        | -3.31      | -2.79        |
| 239956_at   | ---        | ---                  | 0                                    | ---     | -1.64         | 1.88            | 9.66      | 7.93        | -1.28     | -1.47       | 1.20       | -1.93        | 1.09       | -1.73        | 1.73       | 2.12         |

| ID          | Gene Title | Chromosomal Location | 1st Gene Ontology Biological Process | Pathway | A2497 30 mins | A2497P' 30 mins | A2497 2 h | A2497P' 2 h | A2497 4 h | A2497P' 4 h | A2497 24 h | A2497P' 24 h | A2497 48 h | A2497P' 48 h | A2497 72 h | A2497P' 72 h |
|-------------|------------|----------------------|--------------------------------------|---------|---------------|-----------------|-----------|-------------|-----------|-------------|------------|--------------|------------|--------------|------------|--------------|
| 239957_at   | ---        | ---                  | 0                                    | ---     | -1.16         | -1.27           | 1.11      | 1.25        | 1.20      | 1.25        | -1.11      | 1.27         | -2.64      | -3.12        | -1.93      | -1.29        |
| 239965_at   | ---        | ---                  | 0                                    | ---     | 1.77          | 1.66            | 1.36      | 1.55        | 1.08      | 1.25        | -1.06      | 1.04         | -2.63      | -1.76        | -1.74      | -2.17        |
| 239973_at   | ---        | ---                  | 0                                    | ---     | -1.05         | 1.05            | 1.17      | 1.20        | 1.14      | 1.11        | 1.11       | 1.06         | -1.86      | -2.00        | -1.58      | -1.39        |
| 239976_at   | ---        | ---                  | 0                                    | ---     | -1.95         | -2.35           | -1.00     | 2.95        | 1.86      | 1.51        | -1.17      | 1.17         | -2.34      | -1.30        | -3.80      | -2.42        |
| 239991_at   | ---        | ---                  | 0                                    | ---     | -1.27         | -1.21           | 3.38      | 2.60        | 1.20      | -1.58       | -1.77      | 1.15         | -1.06      | -1.41        | -1.02      | -1.26        |
| 240000_at   | ---        | ---                  | 0                                    | ---     | 1.40          | 1.41            | 1.44      | 1.57        | -1.32     | 1.10        | -1.03      | 1.26         | -3.14      | -2.64        | -2.88      | -2.44        |
| 240008_at   | ---        | ---                  | 0                                    | ---     | 1.51          | 1.34            | 1.23      | -1.00       | 1.04      | 1.10        | -1.48      | -1.16        | -2.98      | -2.06        | -1.87      | -1.85        |
| 240018_at   | ---        | ---                  | 0                                    | ---     | 1.07          | 1.15            | -1.13     | -1.02       | -3.70     | -2.34       | 1.80       | -2.04        | -5.43      | 1.54         | 4.13       | 4.52         |
| 240054_at   | ---        | ---                  | 0                                    | ---     | -1.21         | -1.05           | 1.01      | 1.07        | 1.16      | 1.50        | 1.08       | -1.01        | -3.10      | -2.48        | -1.91      | -1.60        |
| 240055_at   | ---        | ---                  | 0                                    | ---     | -1.89         | -5.29           | 1.09      | 1.74        | 1.30      | -1.18       | -1.25      | 1.19         | -3.38      | -2.54        | 1.05       | -1.16        |
| 240059_at   | ---        | ---                  | 0                                    | ---     | 2.89          | 1.42            | -1.06     | -1.11       | 1.38      | 1.69        | 1.86       | -1.83        | 2.50       | 2.46         | -1.04      | 1.62         |
| 240067_at   | ---        | ---                  | 0                                    | ---     | 1.03          | 1.06            | 1.25      | 1.04        | -1.05     | -1.16       | -1.33      | -1.07        | -8.70      | -3.09        | -3.45      | -4.19        |
| 240099_at   | ---        | ---                  | 0                                    | ---     | 4.40          | 5.09            | 1.05      | -1.17       | 1.39      | 2.09        | -1.19      | -1.98        | -1.03      | 1.34         | -2.08      | -1.56        |
| 240109_at   | ---        | ---                  | 0                                    | ---     | -1.64         | -1.04           | -1.52     | -3.83       | 4.55      | 6.15        | -2.38      | -1.36        | 8.49       | 5.12         | 1.86       | 2.11         |
| 240120_at   | ---        | ---                  | 0                                    | ---     | 1.26          | 1.06            | -1.02     | -1.17       | 1.31      | 1.42        | 1.06       | 1.13         | -2.62      | -2.11        | -1.75      | -1.89        |
| 240126_x_at | ---        | ---                  | 0                                    | ---     | 1.33          | -1.10           | -1.07     | 1.23        | -1.12     | 1.02        | 1.41       | 1.12         | 1.57       | 1.18         | 1.15       | -1.02        |
| 240130_at   | ---        | ---                  | 0                                    | ---     | 5.21          | 1.48            | -1.96     | -2.13       | 1.88      | -3.83       | -1.05      | 7.57         | 1.95       | 2.41         | -5.90      | -1.48        |
| 240139_at   | ---        | ---                  | 0                                    | ---     | -1.17         | 1.04            | 1.13      | -1.00       | 1.34      | 1.23        | -1.06      | 1.18         | -1.92      | -1.46        | -1.97      | -2.50        |
| 240141_at   | ---        | ---                  | 0                                    | ---     | 1.22          | 1.10            | 1.18      | 1.10        | 1.11      | 1.20        | -1.03      | 1.11         | -1.21      | -1.07        | -2.27      | -1.72        |
| 240142_at   | ---        | ---                  | 0                                    | ---     | -1.22         | -1.54           | 1.34      | -1.07       | -1.00     | -1.95       | -1.06      | -1.27        | -2.13      | -2.01        | -1.65      | -1.83        |
| 240146_at   | ---        | ---                  | 0                                    | ---     | -1.00         | -1.17           | 1.18      | -1.03       | -1.19     | 1.15        | 1.02       | -1.13        | -2.03      | -1.75        | -1.62      | -1.51        |
| 240148_at   | ---        | ---                  | 0                                    | ---     | -1.11         | 1.25            | -1.01     | 1.11        | 1.03      | -1.12       | 1.04       | 1.03         | -1.65      | -1.39        | -1.45      | -1.63        |
| 240152_at   | ---        | ---                  | 0                                    | ---     | 1.05          | -1.02           | 1.33      | 1.20        | 1.05      | 1.06        | 1.47       | 1.29         | -1.38      | -1.14        | -2.81      | -2.18        |
| 240154_at   | ---        | ---                  | 0                                    | ---     | 1.29          | 1.34            | 1.16      | -1.01       | 1.35      | 1.32        | -1.19      | 1.24         | -3.04      | -2.56        | -3.18      | -4.90        |
| 240158_at   | ---        | ---                  | 0                                    | ---     | -2.07         | 1.69            | -1.45     | -1.52       | -2.63     | 1.45        | 1.40       | 1.21         | -3.75      | 1.35         | -3.20      | -1.92        |
| 240174_at   | ---        | ---                  | 0                                    | ---     | 1.51          | 1.12            | -1.03     | 1.19        | 1.01      | -1.09       | 1.32       | 1.23         | -1.36      | -1.52        | -1.71      | -1.78        |
| 240176_at   | ---        | ---                  | 0                                    | ---     | 1.17          | 1.04            | 1.25      | 1.06        | 1.03      | 1.36        | 1.57       | 1.34         | -1.16      | -2.37        | -1.78      | -1.12        |
| 240188_at   | ---        | ---                  | 0                                    | ---     | 1.08          | 1.06            | 1.36      | 1.09        | -1.46     | 1.02        | -2.04      | -1.00        | -5.05      | -5.81        | -6.18      | -1.28        |
| 240201_at   | ---        | ---                  | 0                                    | ---     | 2.57          | 3.92            | -1.02     | -1.66       | -1.06     | 1.11        | -1.03      | 1.36         | -3.11      | -1.62        | 1.00       | -1.14        |
| 240205_x_at | ---        | ---                  | 0                                    | ---     | -1.44         | -1.08           | -1.00     | -1.11       | -1.20     | -1.07       | 1.25       | 1.24         | -1.01      | -1.04        | -1.36      | -1.55        |
| 240216_at   | ---        | ---                  | 0                                    | ---     | 1.55          | 1.20            | -1.04     | -1.37       | 1.00      | 1.25        | 1.09       | 1.13         | -3.99      | -3.14        | -2.92      | -2.05        |
| 240232_at   | ---        | ---                  | 0                                    | ---     | -1.16         | -1.01           | 1.06      | -1.12       | -1.23     | -1.32       | 1.29       | 1.07         | -2.89      | -1.70        | -1.14      | -1.89        |
| 240237_at   | ---        | ---                  | 0                                    | ---     | 1.06          | 1.02            | 1.10      | 1.05        | 1.01      | 1.03        | 1.05       | 1.18         | -1.12      | 1.15         | -1.51      | -1.81        |
| 240241_at   | ---        | ---                  | 0                                    | ---     | 1.07          | -1.09           | 1.22      | -1.14       | 1.12      | 1.49        | 1.14       | 1.14         | -1.22      | -1.65        | -1.08      | -1.22        |
| 240245_at   | ---        | ---                  | 0                                    | ---     | 1.21          | 1.50            | -1.09     | -1.38       | -1.04     | 1.05        | 1.49       | 1.15         | -3.20      | -1.90        | -2.08      | -2.12        |
| 240269_at   | ---        | ---                  | 0                                    | ---     | -1.16         | -1.05           | 1.14      | 1.17        | 1.03      | 1.33        | -1.37      | -1.14        | 1.85       | 2.19         | 1.86       | 2.17         |
| 240302_at   | ---        | ---                  | 0                                    | ---     | 1.23          | 1.10            | 1.17      | -1.25       | 1.03      | 1.02        | -1.46      | -1.16        | -3.24      | -2.20        | -1.68      | -1.40        |
| 240307_at   | ---        | ---                  | 0                                    | ---     | -1.13         | -1.17           | 1.12      | 1.06        | -1.02     | 1.27        | -1.80      | -1.25        | -3.28      | -2.65        | -1.57      | -1.67        |
| 240308_at   | ---        | ---                  | 0                                    | ---     | 3.82          | 8.44            | 1.73      | 3.74        | -1.61     | -1.07       | -2.65      | -1.70        | -1.09      | 1.59         | -1.02      | 1.70         |
| 240309_at   | ---        | ---                  | 0                                    | ---     | 1.09          | 1.25            | -1.06     | 1.24        | 1.32      | -1.18       | 1.29       | 1.29         | -1.96      | -1.60        | -1.93      | -2.29        |
| 240310_at   | ---        | ---                  | 0                                    | ---     | -1.07         | 1.13            | -1.05     | -1.18       | -1.06     | 1.31        | -1.01      | -1.10        | 1.73       | 1.54         | 1.16       | 1.31         |
| 240319_at   | ---        | ---                  | 0                                    | ---     | 1.19          | -2.01           | -1.10     | -1.68       | 1.44      | 1.82        | -1.16      | 1.64         | 2.35       | 2.12         | 3.50       | 3.32         |
| 240325_x_at | ---        | ---                  | 0                                    | ---     | 1.53          | 1.58            | 1.12      | -1.10       | -3.03     | -2.48       | -2.21      | -1.55        | 1.12       | 1.83         | -1.21      | 1.29         |
| 240332_at   | ---        | ---                  | 0                                    | ---     | 1.44          | 1.25            | 1.02      | -11.47      | -2.37     | 1.08        | 4.87       | 3.32         | 1.31       | 1.78         | 1.62       | 2.04         |
| 240345_x_at | ---        | ---                  | 0                                    | ---     | 1.50          | -1.00           | -1.11     | 1.18        | 1.22      | 1.02        | 1.29       | 1.26         | 1.59       | 1.18         | 1.58       | -1.05        |
| 240350_at   | ---        | ---                  | 0                                    | ---     | 2.69          | 2.56            | 1.59      | 1.19        | -1.97     | -2.31       | -1.26      | -1.92        | 5.53       | 1.41         | 5.72       | 4.36         |
| 240355_at   | ---        | ---                  | 0                                    | ---     | 1.49          | 1.17            | 1.06      | 1.33        | 1.31      | 1.19        | 1.25       | 1.29         | -1.04      | 1.05         | -2.15      | -1.20        |
| 240372_at   | ---        | ---                  | 0                                    | ---     | -1.44         | -1.39           | -1.09     | 1.16        | 1.27      | -1.19       | -1.14      | -1.04        | 1.15       | 1.08         | 1.87       | 1.93         |
| 240396_at   | ---        | ---                  | 0                                    | ---     | 2.99          | 3.46            | -1.12     | -2.62       | -1.21     | 1.90        | 1.45       | 1.62         | 1.83       | 3.21         | 4.78       | 1.75         |
| 240399_at   | ---        | ---                  | 0                                    | ---     | 1.35          | -1.07           | -1.32     | 1.25        | -1.07     | 1.10        | 1.10       | 1.23         | -2.00      | -1.28        | -2.22      | -1.81        |
| 240417_at   | ---        | ---                  | 0                                    | ---     | 1.32          | 2.42            | 1.03      | -1.20       | 1.14      | 1.12        | 1.30       | -1.06        | -1.32      | -1.43        | -1.31      | 1.14         |
| 240418_at   | ---        | ---                  | 0                                    | ---     | 1.09          | 1.10            | 1.24      | 1.06        | 1.09      | 1.15        | 1.34       | 1.29         | -1.49      | -1.74        | -2.95      | -2.43        |
| 240434_at   | ---        | ---                  | 0                                    | ---     | -1.07         | -1.06           | -1.15     | 1.09        | 1.28      | -1.02       | 1.40       | 1.29         | 2.32       | 1.96         | -1.01      | 1.10         |
| 240438_at   | ---        | ---                  | 0                                    | ---     | -1.31         | -1.17           | 1.19      | 1.35        | -1.00     | 1.02        | -1.18      | -1.12        | -2.20      | -1.68        | -1.61      | -1.67        |
| 240446_at   | ---        | ---                  | 0                                    | ---     | 1.05          | 1.31            | 1.45      | 1.10        | -1.14     | -1.02       | 1.15       | 1.08         | -3.42      | -4.51        | -1.11      | -3.51        |
| 240451_at   | ---        | ---                  | 0                                    | ---     | 1.02          | 1.04            | 1.56      | 1.12        | 1.00      | 1.05        | -1.12      | -1.09        | -1.29      | -1.33        | -1.71      | -1.77        |
| 240458_at   | ---        | ---                  | 0                                    | ---     | -1.79         | 1.33            | -1.33     | 1.10        | -1.51     | -1.09       | 1.09       | 1.55         | 1.00       | -1.55        | -3.41      | -4.08        |
| 240463_at   | ---        | ---                  | 0                                    | ---     | 1.22          | 1.15            | 1.85      | 1.45        | 1.81      | 1.68        | -1.13      | -1.16        | 2.35       | 1.17         | 1.08       | -1.18        |
| 240467_at   | ---        | ---                  | 0                                    | ---     | 1.44          | 1.31            | 1.10      | -1.02       | 1.06      | -1.05       | -1.19      | 1.09         | -2.29      | -2.25        | -1.51      | -1.84        |
| 240477_at   | ---        | ---                  | 0                                    | ---     | -1.45         | 1.76            | -1.45     | -1.18       | -2.60     | -1.41       | -6.67      | -1.16        | 4.20       | 3.22         | 1.17       | 1.90         |
| 240478_at   | ---        | ---                  | 0                                    | ---     | -1.08         | -1.08           | 1.03      | 1.13        | 1.11      | 1.09        | -1.10      | 1.05         | -1.55      | -1.54        | -1.66      | -1.43        |
| 240481_at   | ---        | ---                  | 0                                    | ---     | 1.26          | 1.80            | -2.16     | -1.14       | -1.29     | -1.61       | -3.11      | -1.09        | 1.26       | 2.16         | 2.20       | 3.17         |
| 240494_at   | ---        | ---                  | 0                                    | ---     | -2.30         | -1.85           | 1.74      | -1.28       | -1.55     | -1.10       | -1.11      | -1.19        | -3.31      | -1.25        | -2.26      | -3.01        |
| 240507_at   | ---        | ---                  | 0                                    | ---     | 1.45          | -2.23           | -1.51     | -1.95       | -2.46     | -1.18       | -1.11      | 1.13         | -1.81      | -1.49        | 7.59       | 1.67         |
| 240538_at   | ---        | ---                  | 0                                    | ---     | -1.55         | -1.30           | -1.02     | 1.26        | 1.13      | -1.02       | -1.00      | 1.11         | -1.63      | -1.24        | -1.30      | -1.16        |
| 240549_at   | ---        | ---                  | 0                                    | ---     | 1.19          | 1.11            | -1.06     | -1.28       | 1.08      | 1.07        | -1.16      | 1.06         | -2.13      | -1.97        | -1.11      | -1.33        |

| ID          | Gene Title | Chromosomal Location | 1st Gene Ontology Biological Process | Pathway | A2497 30 mins | A2497P' 30 mins | A2497 2 h | A2497P' 2 h | A2497 4 h | A2497P' 4 h | A2497 24 h | A2497P' 24 h | A2497 48 h | A2497P' 48 h | A2497 72 h | A2497P' 72 h |
|-------------|------------|----------------------|--------------------------------------|---------|---------------|-----------------|-----------|-------------|-----------|-------------|------------|--------------|------------|--------------|------------|--------------|
| 240555_at   | ---        | ---                  | 0                                    | ---     | 1.36          | 1.11            | -1.06     | 1.02        | 1.30      | 1.08        | -1.30      | 1.13         | -2.18      | -1.50        | -2.67      | -2.36        |
| 240564_x_at | ---        | ---                  | 0                                    | ---     | 1.52          | 1.66            | 1.09      | -1.23       | 1.68      | 1.71        | 1.52       | 1.48         | -1.90      | -1.89        | -1.83      | -1.50        |
| 240571_at   | ---        | ---                  | 0                                    | ---     | 1.05          | -1.17           | -1.88     | -1.17       | -3.25     | -1.98       | 1.04       | -1.03        | 1.24       | 1.68         | 1.39       | 1.31         |
| 240580_at   | ---        | ---                  | 0                                    | ---     | -3.14         | -1.14           | -1.08     | 2.68        | -9.15     | 1.04        | 1.62       | -1.20        | 3.52       | 3.71         | -1.37      | 1.04         |
| 240591_at   | ---        | ---                  | 0                                    | ---     | 1.15          | -2.67           | 1.11      | -1.30       | 1.13      | 1.48        | -1.40      | -1.51        | -2.03      | -1.98        | -1.60      | -1.89        |
| 240595_at   | ---        | ---                  | 0                                    | ---     | 1.14          | 1.03            | -1.10     | 1.17        | 1.05      | 1.20        | -1.10      | 1.01         | -1.75      | -1.54        | -2.96      | -1.88        |
| 240608_at   | ---        | ---                  | 0                                    | ---     | 1.73          | 1.77            | 1.45      | 1.41        | 1.02      | -1.14       | -1.15      | 1.12         | -2.91      | -2.72        | -2.13      | -1.45        |
| 240616_at   | ---        | ---                  | 0                                    | ---     | -1.15         | -1.02           | -1.04     | -1.29       | -1.29     | -1.29       | -1.05      | -1.12        | -1.33      | -1.45        | -1.04      | -1.04        |
| 240635_at   | ---        | ---                  | 0                                    | ---     | 1.13          | -1.05           | 1.21      | 4.44        | 1.48      | -1.51       | -1.12      | 1.72         | 1.56       | 2.15         | 1.06       | 4.81         |
| 240656_at   | ---        | ---                  | 0                                    | ---     | 1.22          | 1.14            | 1.63      | 1.43        | 1.09      | -1.21       | -1.24      | 1.04         | -2.43      | -3.60        | -2.80      | -2.20        |
| 240663_at   | ---        | ---                  | 0                                    | ---     | 2.10          | 1.16            | -1.08     | -1.04       | 3.01      | 3.59        | 2.05       | -1.08        | -3.68      | -1.94        | -3.92      | -1.82        |
| 240684_at   | ---        | ---                  | 0                                    | ---     | -1.65         | 1.18            | -1.16     | -1.25       | -3.42     | -2.25       | -1.01      | -1.51        | 1.64       | 2.62         | -1.02      | -2.19        |
| 240690_at   | ---        | ---                  | 0                                    | ---     | -1.14         | 1.34            | 1.02      | 1.29        | 1.01      | 1.07        | 1.92       | 1.47         | -1.33      | -1.05        | -1.88      | -2.05        |
| 240698_s_at | ---        | ---                  | 0                                    | ---     | 1.06          | 1.10            | 1.02      | -1.07       | -1.02     | 1.04        | -1.07      | -1.07        | -1.37      | -1.31        | -1.18      | -1.36        |
| 240704_at   | ---        | ---                  | 0                                    | ---     | -1.43         | -1.32           | -1.31     | -1.63       | 7.96      | 2.50        | 4.01       | 2.17         | 3.48       | 3.97         | -3.07      | -1.58        |
| 240720_at   | ---        | ---                  | 0                                    | ---     | -1.23         | -1.79           | -1.34     | -1.36       | -3.70     | -1.23       | -6.35      | -2.17        | 1.66       | 1.65         | -1.27      | -1.02        |
| 240721_at   | ---        | ---                  | 0                                    | ---     | -1.02         | 1.15            | 1.01      | 1.15        | 1.19      | 1.37        | -1.29      | 1.05         | -1.08      | -1.18        | -1.22      | -1.29        |
| 240726_at   | ---        | ---                  | 0                                    | ---     | 2.83          | 2.40            | 1.23      | -1.58       | 1.05      | 1.21        | 1.41       | 2.14         | -1.05      | -1.34        | -1.23      | -1.75        |
| 240732_at   | ---        | ---                  | 0                                    | ---     | 5.10          | 4.70            | 3.37      | -1.07       | 1.06      | -2.17       | -1.47      | -1.90        | 13.06      | 4.82         | 2.04       | 1.00         |
| 240736_at   | ---        | ---                  | 0                                    | ---     | -1.14         | 1.20            | -1.00     | -1.30       | 1.12      | -1.19       | 1.15       | -1.57        | -1.17      | -1.56        | -1.63      | -2.87        |
| 240762_at   | ---        | ---                  | 0                                    | ---     | 1.06          | -1.58           | 1.31      | 1.10        | 1.13      | 1.12        | 1.42       | -1.10        | -6.09      | -3.09        | -2.59      | -2.91        |
| 240774_at   | ---        | ---                  | 0                                    | ---     | 2.01          | 2.27            | 1.02      | 1.42        | -1.35     | -1.99       | 1.28       | 1.46         | 1.05       | -2.57        | -1.34      | -1.09        |
| 240776_at   | ---        | ---                  | 0                                    | ---     | -1.39         | -9.35           | -1.75     | -2.65       | 1.52      | 6.41        | 2.39       | 1.37         | 6.24       | 1.28         | 4.37       | 7.40         |
| 240792_at   | ---        | ---                  | 0                                    | ---     | 4.96          | 2.58            | -3.86     | -1.05       | -5.04     | 3.26        | 1.53       | 4.36         | 2.07       | 2.88         | -2.33      | -2.92        |
| 240798_at   | ---        | ---                  | 0                                    | ---     | 1.61          | -1.20           | -1.14     | 1.22        | 1.58      | -1.08       | -1.07      | 1.15         | -3.00      | -3.65        | -2.17      | -1.53        |
| 240802_at   | ---        | ---                  | 0                                    | ---     | 1.55          | 1.32            | -1.88     | -4.90       | 5.48      | 6.41        | -1.64      | 2.53         | 1.99       | 3.05         | 1.52       | -2.20        |
| 240835_at   | ---        | ---                  | 0                                    | ---     | -1.91         | 2.55            | 1.01      | 1.01        | -2.28     | -1.74       | -1.04      | 4.43         | 1.37       | 1.37         | -1.34      | -1.18        |
| 240855_at   | ---        | ---                  | 0                                    | ---     | -4.77         | -1.91           | 8.15      | 2.03        | -2.01     | 1.01        | 4.46       | 5.47         | -1.00      | -1.73        | 1.34       | 1.42         |
| 240858_at   | ---        | ---                  | 0                                    | ---     | -3.49         | 1.87            | -1.16     | 1.80        | 1.28      | 1.54        | -2.17      | -1.25        | 2.11       | 3.93         | -1.00      | -1.47        |
| 240861_at   | ---        | ---                  | 0                                    | ---     | 1.19          | 1.47            | -1.32     | 1.02        | 4.49      | 2.26        | -1.30      | -1.71        | 2.26       | 1.89         | -1.71      | 1.02         |
| 240867_at   | ---        | ---                  | 0                                    | ---     | 1.74          | 1.02            | 1.73      | 1.82        | -1.11     | -1.07       | 1.01       | 1.13         | -4.10      | -2.97        | -5.62      | -10.00       |
| 240874_at   | ---        | ---                  | 0                                    | ---     | -1.89         | -1.07           | 1.82      | 3.28        | 1.76      | -1.00       | -3.38      | -2.98        | -2.16      | -1.41        | -1.61      | -1.06        |
| 240892_at   | ---        | ---                  | 0                                    | ---     | -1.04         | -1.02           | 1.07      | 1.18        | 1.19      | -1.05       | -1.40      | -1.34        | -2.72      | -1.34        | -3.12      | -2.24        |
| 240903_at   | ---        | ---                  | 0                                    | ---     | 1.05          | -1.27           | -1.14     | 1.10        | 1.22      | 1.13        | -1.24      | -1.18        | 4.76       | 9.57         | -2.59      | -1.07        |
| 240916_x_at | ---        | ---                  | 0                                    | ---     | -2.07         | -1.12           | -1.94     | -3.40       | -3.11     | 1.31        | 1.22       | 2.54         | -2.96      | -2.98        | -1.71      | -1.40        |
| 240924_x_at | ---        | ---                  | 0                                    | ---     | -1.78         | -2.87           | 5.07      | -1.57       | 4.23      | 6.06        | 1.54       | -2.52        | 1.90       | -1.03        | -2.80      | -1.19        |
| 240934_at   | ---        | ---                  | 0                                    | ---     | 3.19          | -1.46           | -2.74     | -1.68       | -1.33     | -3.12       | 4.14       | 4.18         | 5.07       | 3.04         | 1.07       | -1.23        |
| 240949_x_at | ---        | ---                  | 0                                    | ---     | -1.31         | -1.92           | 1.10      | -1.74       | -1.84     | 2.50        | 3.31       | 3.91         | -3.35      | -1.44        | -1.27      | -1.31        |
| 240957_at   | ---        | ---                  | 0                                    | ---     | 2.46          | 1.62            | 1.21      | 1.27        | 1.75      | 1.09        | -2.81      | -1.23        | 1.21       | -1.02        | -1.70      | -1.11        |
| 240970_x_at | ---        | ---                  | 0                                    | ---     | -1.65         | 2.18            | 2.52      | 1.30        | 7.98      | 1.19        | -3.18      | -1.04        | 2.53       | -1.57        | 6.22       | 8.77         |
| 240972_at   | ---        | ---                  | 0                                    | ---     | -1.25         | -1.10           | -1.00     | -1.37       | -1.01     | -1.31       | -1.13      | -1.12        | -1.92      | -1.73        | -1.52      | -1.98        |
| 240973_s_at | ---        | ---                  | 0                                    | ---     | -1.21         | -1.12           | 1.05      | -1.19       | 1.01      | 1.03        | -1.33      | -1.17        | -1.73      | -1.88        | -1.82      | -2.06        |
| 240991_at   | ---        | ---                  | 0                                    | ---     | -1.14         | 1.21            | 1.45      | 1.00        | 1.14      | 1.15        | 1.83       | 1.29         | 1.05       | 2.18         | 1.41       | 2.78         |
| 240994_at   | ---        | ---                  | 0                                    | ---     | -1.80         | 1.18            | 1.09      | 1.54        | -1.57     | -2.80       | 1.76       | 1.42         | -1.65      | -1.76        | 3.71       | 1.39         |
| 241002_at   | ---        | ---                  | 0                                    | ---     | 1.57          | -1.08           | -1.41     | -1.12       | 1.37      | 2.71        | -2.31      | -2.88        | -1.24      | -1.18        | 1.08       | -1.52        |
| 241019_at   | ---        | ---                  | 0                                    | ---     | 1.17          | 1.67            | 2.60      | 1.13        | 1.71      | 1.81        | 1.16       | -1.02        | 2.72       | 2.62         | -2.53      | -1.13        |
| 241036_at   | ---        | ---                  | 0                                    | ---     | -1.34         | -1.02           | -1.06     | -1.02       | 1.29      | 1.06        | 1.22       | 1.01         | 1.02       | 1.16         | 1.10       | 1.13         |
| 241037_at   | ---        | ---                  | 0                                    | ---     | 2.15          | 1.58            | -1.94     | -2.70       | -2.45     | -5.85       | 1.37       | 2.92         | 3.74       | 1.46         | -1.64      | -2.27        |
| 241043_at   | ---        | ---                  | 0                                    | ---     | -1.79         | 1.42            | -1.04     | -1.17       | 1.05      | 7.15        | 2.77       | 2.09         | -1.25      | -2.24        | -1.09      | -2.28        |
| 241059_at   | ---        | ---                  | 0                                    | ---     | -1.37         | 1.04            | -1.35     | 1.17        | 2.83      | 2.27        | 1.42       | -1.15        | 1.26       | 1.18         | -3.03      | -3.86        |
| 241060_x_at | ---        | ---                  | 0                                    | ---     | 7.68          | 4.15            | -1.39     | 1.19        | 2.09      | -1.20       | 1.52       | -1.53        | 8.70       | 2.34         | 1.34       | 2.49         |
| 241079_at   | ---        | ---                  | 0                                    | ---     | 1.10          | -1.06           | 1.09      | 1.25        | 1.03      | 1.27        | -1.24      | -1.40        | -2.34      | -2.42        | -1.78      | -1.39        |
| 241086_at   | ---        | ---                  | 0                                    | ---     | -1.08         | 1.04            | 1.24      | 1.29        | 1.23      | 1.30        | -1.23      | -1.26        | -1.40      | -1.52        | -2.01      | -1.70        |
| 241092_at   | ---        | ---                  | 0                                    | ---     | 1.57          | 1.24            | -1.11     | -1.20       | -1.09     | 1.13        | 1.03       | -2.03        | -3.27      | -2.50        | -2.43      | -2.61        |
| 241093_at   | ---        | ---                  | 0                                    | ---     | 1.56          | 1.59            | 1.33      | -2.97       | -1.32     | -2.02       | 1.71       | 1.59         | 1.18       | 1.65         | 1.15       | 1.37         |
| 241102_at   | ---        | ---                  | 0                                    | ---     | 2.13          | 1.36            | 1.21      | -1.23       | 1.02      | -1.32       | -2.04      | -1.23        | -3.59      | -4.07        | 1.02       | 1.18         |
| 241114_s_at | ---        | ---                  | 0                                    | ---     | 1.07          | -1.03           | 1.01      | -1.02       | -1.03     | 1.06        | -1.04      | -1.08        | -1.42      | -1.13        | -2.58      | -1.92        |
| 241131_at   | ---        | ---                  | 0                                    | ---     | -2.30         | 1.08            | -2.31     | -12.05      | 7.71      | 11.58       | 5.40       | 12.08        | -1.80      | -2.81        | 1.43       | -1.02        |
| 241136_at   | ---        | ---                  | 0                                    | ---     | 3.32          | 3.20            | -1.48     | -1.16       | -1.02     | 1.57        | 4.39       | 3.16         | 1.14       | -1.13        | 1.99       | 1.12         |
| 241156_at   | ---        | ---                  | 0                                    | ---     | 1.44          | 1.03            | 1.08      | -1.03       | 1.68      | 1.28        | -1.99      | -1.82        | -1.72      | -1.58        | 1.61       | 1.67         |
| 241159_x_at | ---        | ---                  | 0                                    | ---     | 2.07          | 1.48            | 1.42      | 1.19        | -1.19     | -1.00       | -1.04      | -1.02        | -1.81      | -1.55        | -1.19      | -1.36        |
| 241200_x_at | ---        | ---                  | 0                                    | ---     | -1.67         | -1.52           | -1.25     | -1.16       | -1.19     | 1.01        | 1.04       | 1.51         | -1.53      | -2.03        | -2.46      | -3.24        |
| 241202_at   | ---        | ---                  | 0                                    | ---     | -1.10         | -1.06           | 1.06      | -1.03       | 1.25      | 1.13        | 1.01       | 1.12         | -1.39      | -1.73        | -1.57      | 1.02         |
| 241206_at   | ---        | ---                  | 0                                    | ---     | -2.45         | -1.24           | -1.00     | 1.04        | 1.24      | -1.07       | -1.44      | -2.19        | 1.44       | -2.75        | -3.58      | -7.75        |
| 241222_at   | ---        | ---                  | 0                                    | ---     | -1.52         | -1.06           | 1.35      | 2.75        | 2.02      | 2.75        | 1.03       | 1.75         | -1.27      | -1.59        | 1.73       | 1.58         |
| 241229_at   | ---        | ---                  | 0                                    | ---     | 1.20          | 1.22            | 1.41      | 1.13        | 1.10      | -1.01       | -1.12      | -1.09        | 3.71       | 3.73         | 1.23       | 1.61         |

| ID          | Gene Title | Chromosomal Location | 1st Gene Ontology Biological Process | Pathway | A2497 30 mins | A2497P' 30 mins | A2497 2 h | A2497P' 2 h | A2497 4 h | A2497P' 4 h | A2497 24 h | A2497P' 24 h | A2497 48 h | A2497P' 48 h | A2497 72 h | A2497P' 72 h |
|-------------|------------|----------------------|--------------------------------------|---------|---------------|-----------------|-----------|-------------|-----------|-------------|------------|--------------|------------|--------------|------------|--------------|
| 241246_at   | ---        | ---                  | 0                                    | ---     | 3.66          | 6.76            | 1.11      | 2.27        | -1.24     | -1.04       | -1.34      | 3.50         | -1.02      | -1.76        | 2.16       | 1.35         |
| 241294_at   | ---        | ---                  | 0                                    | ---     | 1.49          | -1.44           | 1.37      | 1.79        | 1.48      | 1.25        | 3.27       | 3.36         | 1.13       | -1.52        | -2.50      | -1.85        |
| 241295_at   | ---        | ---                  | 0                                    | ---     | 1.42          | 1.32            | -2.76     | -3.58       | -1.14     | 1.52        | 1.92       | -1.34        | 2.30       | -1.71        | 4.16       | 2.82         |
| 241300_at   | ---        | ---                  | 0                                    | ---     | 1.28          | 1.23            | 1.12      | 1.12        | -1.11     | 1.10        | -1.26      | -1.55        | -1.64      | -1.75        | -1.88      | ---          |
| 241303_x_at | ---        | ---                  | 0                                    | ---     | 1.18          | 1.26            | 1.10      | -1.03       | 1.08      | 1.60        | -2.12      | -1.35        | -1.60      | 1.02         | -1.33      | 1.04         |
| 241313_at   | ---        | ---                  | 0                                    | ---     | -3.36         | -2.32           | -1.44     | -4.93       | 3.07      | 1.88        | 1.02       | -1.04        | 2.88       | 4.23         | 3.10       | 2.76         |
| 241320_at   | ---        | ---                  | 0                                    | ---     | 1.04          | -1.19           | 1.15      | 1.19        | 1.01      | 1.03        | 1.23       | -1.09        | -1.55      | -1.83        | -1.84      | -1.68        |
| 241321_at   | ---        | ---                  | 0                                    | ---     | 1.13          | -1.12           | -1.51     | -1.40       | -1.31     | 1.15        | -1.50      | -1.28        | -2.28      | -1.87        | -2.56      | -2.70        |
| 241323_at   | ---        | ---                  | 0                                    | ---     | 1.09          | 1.55            | 1.43      | 1.02        | -1.46     | -1.05       | -1.43      | -1.43        | -3.56      | -2.67        | -1.49      | -2.57        |
| 241339_at   | ---        | ---                  | 0                                    | ---     | 1.41          | -2.15           | -2.23     | 1.15        | 1.31      | -1.19       | -5.19      | -4.39        | 4.88       | 2.24         | -2.45      | -3.22        |
| 241344_at   | ---        | ---                  | 0                                    | ---     | 1.13          | 1.25            | 1.19      | -1.09       | -1.04     | 1.02        | -1.11      | 1.08         | -1.82      | -1.82        | -2.46      | -1.97        |
| 241349_at   | ---        | ---                  | 0                                    | ---     | -1.05         | 1.03            | -1.20     | -1.35       | -1.08     | 1.31        | -1.43      | -1.13        | -1.37      | 1.15         | -1.77      | -1.50        |
| 241351_at   | ---        | ---                  | 0                                    | ---     | -1.47         | -1.15           | 1.89      | -1.06       | -1.78     | -1.43       | -2.49      | -3.84        | -2.19      | 1.05         | 1.11       | 1.19         |
| 241356_at   | ---        | ---                  | 0                                    | ---     | -1.64         | -8.28           | 2.44      | 2.69        | -1.07     | -1.02       | -1.01      | 3.06         | 1.11       | 6.72         | -4.11      | 3.28         |
| 241369_at   | ---        | ---                  | 0                                    | ---     | 1.62          | 2.68            | 1.23      | -1.29       | -1.90     | -1.58       | 1.85       | -1.00        | -1.66      | -1.29        | 2.49       | 5.66         |
| 241373_at   | ---        | ---                  | 0                                    | ---     | 1.01          | -1.01           | -1.02     | -1.00       | 1.01      | -1.04       | 1.12       | 1.06         | -1.38      | -1.37        | -1.60      | -1.46        |
| 241376_at   | ---        | ---                  | 0                                    | ---     | -1.54         | -1.36           | -5.55     | -2.68       | 1.14      | 2.13        | -1.04      | 6.14         | -2.14      | -2.52        | -1.90      | -2.84        |
| 241388_at   | ---        | ---                  | 0                                    | ---     | -1.13         | -1.51           | 1.22      | 1.19        | 1.08      | 1.09        | -1.22      | 1.20         | -2.17      | -1.57        | -1.76      | -1.13        |
| 241397_at   | ---        | ---                  | 0                                    | ---     | -1.14         | 1.18            | 1.72      | 1.21        | 1.31      | 1.15        | -1.50      | -1.17        | -1.95      | -1.53        | -1.34      | -2.38        |
| 241400_at   | ---        | ---                  | 0                                    | ---     | 1.33          | 1.37            | -1.28     | 1.21        | -1.38     | -1.51       | -1.43      | -1.33        | -1.07      | -1.48        | -1.64      | -1.43        |
| 241404_at   | ---        | ---                  | 0                                    | ---     | 1.81          | 1.81            | 1.18      | 1.14        | 1.41      | 1.21        | 1.07       | 1.05         | -3.02      | -2.05        | -2.48      | -1.89        |
| 241407_at   | ---        | ---                  | 0                                    | ---     | -1.10         | 1.05            | 1.15      | 1.07        | 1.14      | 1.04        | -1.53      | -1.19        | -1.93      | -1.37        | -3.03      | -2.33        |
| 241409_at   | ---        | ---                  | 0                                    | ---     | -1.08         | -1.16           | 1.66      | 1.67        | 1.05      | 1.14        | -1.28      | 1.21         | -1.29      | -1.64        | -1.14      | -1.22        |
| 241410_at   | ---        | ---                  | 0                                    | ---     | 1.34          | 1.07            | -1.16     | -1.12       | 1.28      | 1.20        | -1.15      | -1.12        | -3.91      | -3.03        | -2.70      | -2.20        |
| 241411_at   | ---        | ---                  | 0                                    | ---     | 1.01          | 1.06            | -1.04     | 1.01        | 1.45      | 1.39        | -1.08      | -1.03        | -1.51      | -1.21        | -3.32      | -2.28        |
| 241429_at   | ---        | ---                  | 0                                    | ---     | 1.78          | 1.40            | 1.20      | 1.28        | -1.15     | -1.18       | -1.32      | 1.18         | -8.49      | -4.43        | -6.07      | -4.61        |
| 241435_at   | ---        | ---                  | 0                                    | ---     | 1.79          | -1.30           | 1.12      | 1.07        | 1.51      | 1.20        | 1.08       | -1.00        | 1.14       | 1.19         | -1.08      | 1.16         |
| 241443_at   | ---        | ---                  | 0                                    | ---     | 1.10          | 1.07            | 1.12      | 1.01        | -1.18     | -1.00       | -1.25      | 1.00         | -1.15      | -1.05        | 1.13       | 1.13         |
| 241452_at   | ---        | ---                  | 0                                    | ---     | -2.74         | -2.18           | 2.82      | -1.63       | 7.54      | 4.19        | 1.83       | -1.09        | -1.23      | 1.97         | 3.59       | 3.91         |
| 241458_at   | ---        | ---                  | 0                                    | ---     | 1.15          | 1.38            | 1.42      | 1.18        | -1.33     | -1.12       | -1.24      | -1.33        | -1.08      | -1.08        | 1.24       | 1.09         |
| 241459_at   | ---        | ---                  | 0                                    | ---     | 1.25          | 1.27            | 1.09      | -1.01       | -1.12     | 1.12        | 1.27       | 1.19         | -1.88      | -1.87        | -1.86      | -1.62        |
| 241474_at   | ---        | ---                  | 0                                    | ---     | 1.08          | -1.03           | 1.01      | -1.27       | -1.09     | 1.25        | -1.33      | -1.20        | -3.35      | -1.65        | -2.77      | -2.47        |
| 241484_x_at | ---        | ---                  | 0                                    | ---     | -1.12         | 1.05            | 1.37      | 1.06        | 1.08      | 1.00        | -1.11      | -1.42        | -1.68      | -1.67        | -2.07      | -2.07        |
| 241493_at   | ---        | ---                  | 0                                    | ---     | 1.92          | 3.88            | 4.92      | 2.25        | 1.12      | 2.02        | 1.10       | 1.07         | 1.05       | -1.63        | -1.30      | -4.63        |
| 241532_at   | ---        | ---                  | 0                                    | ---     | -5.46         | 1.47            | -1.65     | -3.74       | -1.59     | -1.21       | 1.58       | 1.05         | -1.39      | 1.86         | 1.65       | 1.57         |
| 241556_at   | ---        | ---                  | 0                                    | ---     | 1.22          | 1.05            | 4.05      | 2.61        | -1.12     | -2.03       | 1.64       | 1.27         | 1.13       | -1.64        | 1.50       | 1.41         |
| 241558_at   | ---        | ---                  | 0                                    | ---     | 2.18          | 1.19            | -1.51     | -2.26       | -1.17     | 1.15        | 1.36       | 1.20         | -2.05      | 3.37         | 1.14       | 1.07         |
| 241576_at   | ---        | ---                  | 0                                    | ---     | -2.02         | -1.14           | 1.10      | 2.39        | 1.13      | 1.22        | -2.20      | -1.84        | -1.20      | -2.02        | 1.29       | -1.74        |
| 241595_at   | ---        | ---                  | 0                                    | ---     | -1.47         | 1.07            | -1.05     | -1.14       | 1.22      | 1.36        | -1.56      | -1.25        | -2.54      | -2.24        | -1.40      | -1.37        |
| 241597_at   | ---        | ---                  | 0                                    | ---     | 1.81          | 1.70            | 1.32      | 1.33        | 1.58      | 1.60        | -1.10      | -1.03        | -1.99      | -2.82        | -1.95      | -1.20        |
| 241629_at   | ---        | ---                  | 0                                    | ---     | -3.29         | -1.05           | 2.84      | 1.55        | 1.37      | 1.37        | 1.24       | 1.54         | 2.34       | 1.31         | -1.43      | -1.49        |
| 241630_at   | ---        | ---                  | 0                                    | ---     | -1.24         | 1.18            | 1.22      | 1.03        | -1.01     | 1.14        | -1.18      | -1.15        | -1.64      | -2.68        | -1.72      | -1.29        |
| 241632_x_at | ---        | ---                  | 0                                    | ---     | -1.10         | 1.27            | 1.15      | 1.06        | -1.25     | -1.02       | 1.05       | 1.16         | -1.27      | -1.34        | -1.66      | -1.47        |
| 241635_at   | ---        | ---                  | 0                                    | ---     | 3.67          | 2.28            | 2.50      | 2.54        | -1.58     | 1.03        | 5.06       | 3.28         | 8.76       | 1.73         | 1.30       | 2.00         |
| 241664_x_at | ---        | ---                  | 0                                    | ---     | 1.61          | 2.49            | -2.11     | -4.73       | -1.18     | -1.58       | -2.79      | 2.39         | 3.30       | 1.64         | 8.41       | 7.46         |
| 241676_x_at | ---        | ---                  | 0                                    | ---     | 1.57          | 1.36            | 1.51      | 1.48        | -1.08     | -1.23       | -1.11      | 1.10         | -2.32      | -6.34        | -4.37      | -3.77        |
| 241677_x_at | ---        | ---                  | 0                                    | ---     | -1.20         | -1.14           | -2.36     | -2.36       | 1.20      | -1.05       | -1.07      | -1.08        | -1.07      | -1.44        | -1.35      | -1.14        |
| 241679_at   | ---        | ---                  | 0                                    | ---     | 2.13          | -4.16           | -1.02     | -1.15       | -1.03     | 1.36        | -1.21      | 1.07         | 3.14       | 2.85         | 2.33       | 1.63         |
| 241680_at   | ---        | ---                  | 0                                    | ---     | 1.37          | 1.25            | 1.08      | -1.06       | 1.03      | -1.01       | -1.33      | -1.42        | -1.49      | -1.50        | -1.50      | -1.48        |
| 241681_at   | ---        | ---                  | 0                                    | ---     | 1.24          | 1.18            | -1.03     | 1.05        | 1.35      | 1.31        | -1.00      | -1.00        | -2.19      | -2.59        | -1.70      | -1.35        |
| 241686_x_at | ---        | ---                  | 0                                    | ---     | 1.17          | -1.04           | -1.40     | -1.84       | -1.10     | 1.30        | -1.57      | 1.32         | -1.28      | -1.07        | -1.89      | -2.18        |
| 241718_x_at | ---        | ---                  | 0                                    | ---     | -1.00         | -1.02           | -1.01     | 1.01        | 1.11      | 1.12        | 1.18       | 1.10         | -1.26      | -1.07        | -1.50      | -1.49        |
| 241726_at   | ---        | ---                  | 0                                    | ---     | 1.02          | -1.19           | -1.13     | -1.06       | -1.07     | 1.02        | -1.27      | -1.11        | 1.06       | 1.04         | 1.57       | 1.58         |
| 241740_at   | ---        | ---                  | 0                                    | ---     | 4.97          | 1.28            | -1.49     | -2.64       | -4.49     | 1.41        | -1.29      | 1.12         | -1.32      | -1.43        | 3.23       | 1.91         |
| 241758_at   | ---        | ---                  | 0                                    | ---     | -16.30        | -2.29           | 3.48      | 1.55        | -5.52     | -4.19       | -4.01      | 4.57         | -4.15      | -1.45        | 9.55       | -1.03        |
| 241768_at   | ---        | ---                  | 0                                    | ---     | 1.03          | -1.22           | -1.44     | -1.00       | -1.07     | 1.13        | -1.26      | -1.33        | -2.86      | -1.86        | -1.52      | -2.03        |
| 241773_at   | ---        | ---                  | 0                                    | ---     | 2.49          | 1.88            | 1.09      | -1.09       | 2.90      | 2.00        | 1.92       | 1.92         | 1.75       | 1.88         | -1.69      | -2.92        |
| 241780_at   | ---        | ---                  | 0                                    | ---     | 1.24          | 1.18            | 1.17      | -2.30       | -1.45     | 1.07        | 1.26       | 1.76         | 7.77       | 7.45         | 6.05       | 7.64         |
| 241798_at   | ---        | ---                  | 0                                    | ---     | -1.05         | -1.19           | 1.49      | -1.01       | 1.04      | -1.03       | 1.03       | -1.86        | -2.42      | -1.61        | -1.73      | ---          |
| 241807_x_at | ---        | ---                  | 0                                    | ---     | 1.51          | 1.22            | 1.32      | -1.76       | -7.62     | -3.70       | 2.34       | 2.89         | -2.23      | -1.31        | 2.75       | 5.06         |
| 241815_at   | ---        | ---                  | 0                                    | ---     | 1.52          | 1.72            | 1.15      | -1.06       | 1.10      | 1.64        | -2.00      | -1.58        | -2.69      | -2.28        | -3.23      | -3.25        |
| 241823_at   | ---        | ---                  | 0                                    | ---     | -1.04         | -1.01           | 1.20      | 1.51        | 1.13      | 1.14        | -1.36      | -1.22        | -6.19      | -4.01        | -4.77      | -3.52        |
| 241835_at   | ---        | ---                  | 0                                    | ---     | 1.02          | 1.22            | -1.27     | -1.49       | -1.28     | -1.08       | -1.21      | -1.04        | -1.53      | -1.39        | -1.64      | -1.60        |
| 241841_at   | ---        | ---                  | 0                                    | ---     | -1.55         | -1.12           | -1.18     | 1.18        | -1.04     | -1.01       | 1.15       | -1.82        | -2.04      | -2.91        | -2.41      | ---          |
| 241845_at   | ---        | ---                  | 0                                    | ---     | -1.18         | 1.33            | -1.01     | 1.32        | 1.04      | 1.46        | -1.64      | -1.84        | -1.09      | -1.70        | -2.74      | -1.93        |
| 241848_x_at | ---        | ---                  | 0                                    | ---     | 2.12          | 1.86            | 1.44      | 1.97        | 1.16      | 1.11        | 1.43       | 1.22         | 1.13       | 1.07         | -3.29      | -5.88        |

| ID          | Gene Title | Chromosomal Location | 1st Gene Ontology Biological Process | Pathway | A2497 30 mins | A2497P' 30 mins | A2497 2 h | A2497P' 2 h | A2497 4 h | A2497P' 4 h | A2497 24 h | A2497P' 24 h | A2497 48 h | A2497P' 48 h | A2497 72 h | A2497P' 72 h |
|-------------|------------|----------------------|--------------------------------------|---------|---------------|-----------------|-----------|-------------|-----------|-------------|------------|--------------|------------|--------------|------------|--------------|
| 241850_at   | ---        | ---                  | 0                                    | ---     | -1.20         | 1.23            | -1.21     | -2.70       | 1.17      | 1.23        | -2.84      | -2.15        | 1.54       | -1.06        | 1.20       | -1.76        |
| 241855_s_at | ---        | ---                  | 0                                    | ---     | 1.41          | -1.04           | 2.23      | 2.03        | 2.82      | -1.38       | -1.01      | -1.52        | 1.23       | -1.20        | -2.44      | -2.93        |
| 241857_at   | ---        | ---                  | 0                                    | ---     | 1.33          | 1.85            | 1.10      | 1.09        | 1.42      | -1.20       | -1.85      | 1.22         | -1.99      | -2.09        | -5.24      | -3.81        |
| 241864_x_at | ---        | ---                  | 0                                    | ---     | 1.19          | -1.04           | 1.35      | 1.44        | -1.32     | 1.29        | -1.36      | -1.21        | -1.57      | -1.08        | -2.74      | -1.76        |
| 241878_at   | ---        | ---                  | 0                                    | ---     | 1.25          | 1.35            | 1.21      | 1.35        | -1.20     | -1.32       | 1.07       | -1.30        | -1.82      | -1.27        | -1.54      | -1.46        |
| 241885_at   | ---        | ---                  | 0                                    | ---     | 1.12          | 1.13            | -1.04     | 1.05        | 1.30      | 1.43        | -1.13      | -1.18        | -1.80      | -1.42        | -1.96      | -1.49        |
| 241906_at   | ---        | ---                  | 0                                    | ---     | 1.26          | -1.17           | 1.07      | 1.16        | 1.28      | 1.23        | -1.27      | -1.12        | -1.58      | -1.64        | -2.56      | -2.16        |
| 241932_at   | ---        | ---                  | 0                                    | ---     | 1.62          | 1.52            | 1.10      | -1.34       | 1.04      | 1.32        | -1.14      | -1.15        | -2.25      | -2.76        | -2.23      | -2.76        |
| 241940_at   | ---        | ---                  | 0                                    | ---     | 1.27          | 1.03            | 1.24      | 1.09        | 1.16      | 1.45        | -1.32      | -1.11        | -2.31      | -1.61        | -1.84      | -2.20        |
| 241948_at   | ---        | ---                  | 0                                    | ---     | -1.22         | -1.28           | -2.03     | -1.26       | 1.36      | 1.53        | 1.97       | 1.47         | -1.22      | 1.18         | -2.70      | -1.75        |
| 241956_at   | ---        | ---                  | 0                                    | ---     | -1.02         | -1.30           | -1.02     | 1.29        | -1.09     | 1.31        | -1.18      | -1.28        | -1.75      | -1.25        | -1.67      | -2.16        |
| 241965_at   | ---        | ---                  | 0                                    | ---     | 1.21          | -1.26           | 1.11      | -1.30       | 1.48      | 1.47        | 1.10       | -1.53        | -1.00      | -1.03        | -2.29      | -5.02        |
| 241967_at   | ---        | ---                  | 0                                    | ---     | -1.65         | -4.17           | -1.93     | -1.23       | -1.01     | 1.01        | -6.19      | 1.24         | -1.88      | 3.32         | 1.93       | 1.43         |
| 241970_at   | ---        | ---                  | 0                                    | ---     | 1.35          | 1.29            | -1.41     | -1.14       | 1.35      | 1.26        | -1.21      | -1.36        | -2.22      | -2.14        | -3.56      | -3.29        |
| 241975_at   | ---        | ---                  | 0                                    | ---     | -1.00         | 1.06            | 1.04      | 1.01        | -1.25     | -1.02       | -1.15      | -1.12        | -2.05      | -2.01        | -2.19      | -2.17        |
| 241982_at   | ---        | ---                  | 0                                    | ---     | -1.07         | -1.02           | -1.09     | -1.33       | 1.10      | -1.01       | 1.49       | 1.39         | 2.01       | 2.09         | 2.15       | 1.85         |
| 241992_at   | ---        | ---                  | 0                                    | ---     | -1.39         | -1.31           | 1.06      | 1.10        | 1.15      | -1.10       | -1.07      | -1.08        | -2.90      | -3.14        | -1.27      | -2.11        |
| 241993_x_at | ---        | ---                  | 0                                    | ---     | -1.10         | -1.32           | -1.01     | 1.06        | -1.06     | -1.20       | -1.12      | 1.01         | -2.17      | -1.43        | -1.71      | -1.70        |
| 241997_at   | ---        | ---                  | 0                                    | ---     | 1.24          | 1.05            | -1.15     | -1.05       | 1.14      | 1.25        | 1.32       | 1.14         | -1.41      | -1.31        | -1.53      | -1.19        |
| 242008_at   | ---        | ---                  | 0                                    | ---     | -1.04         | -1.45           | 1.35      | 1.02        | -1.23     | 1.07        | 1.17       | -1.23        | -1.55      | -1.74        | -1.93      | -2.63        |
| 242010_at   | ---        | ---                  | 0                                    | ---     | -1.33         | -1.27           | 1.99      | 1.59        | 1.77      | 2.62        | -2.79      | -3.82        | 2.12       | -1.77        | 4.52       | 4.31         |
| 242022_at   | ---        | ---                  | 0                                    | ---     | -1.09         | 1.00            | -1.00     | -1.06       | 1.21      | 1.26        | -1.17      | 1.01         | -3.32      | -2.81        | -2.25      | -1.86        |
| 242027_at   | ---        | ---                  | 0                                    | ---     | -1.31         | -2.26           | -1.11     | -1.46       | 1.10      | 1.04        | 1.00       | -1.14        | -2.76      | -1.58        | 1.12       | 1.19         |
| 242043_s_at | ---        | ---                  | 0                                    | ---     | 1.31          | 1.34            | 1.60      | 1.45        | -1.34     | -2.42       | 1.51       | 1.15         | -1.13      | -1.28        | 1.38       | -1.10        |
| 242051_at   | ---        | ---                  | 0                                    | ---     | 1.14          | 1.34            | -1.03     | -1.14       | 1.46      | 1.30        | -1.19      | -1.75        | -2.49      | -3.94        | -4.36      | -11.13       |
| 242052_at   | ---        | ---                  | 0                                    | ---     | 1.07          | 1.02            | -1.10     | -1.08       | 1.15      | 1.35        | -1.09      | -1.45        | -1.59      | -1.56        | -2.23      | -2.47        |
| 242053_at   | ---        | ---                  | 0                                    | ---     | -1.32         | -1.12           | 1.12      | 1.08        | -1.05     | -1.22       | 1.01       | 1.13         | -1.76      | -1.53        | -1.76      | -1.48        |
| 242057_at   | ---        | ---                  | 0                                    | ---     | 1.05          | -1.58           | 1.26      | -1.07       | -1.09     | 1.05        | -1.24      | -1.10        | -3.06      | -1.93        | -1.65      | -1.77        |
| 242063_s_at | ---        | ---                  | 0                                    | ---     | 1.04          | 1.26            | -1.84     | -1.71       | -28.22    | -1.15       | -1.85      | -8.25        | 3.49       | 2.15         | -1.49      | -3.87        |
| 242067_at   | ---        | ---                  | 0                                    | ---     | 1.55          | -1.41           | -2.59     | -2.80       | 1.38      | -2.12       | -2.55      | -1.69        | 1.50       | 1.39         | 1.77       | 1.09         |
| 242068_at   | ---        | ---                  | 0                                    | ---     | 1.12          | 1.13            | 1.34      | -1.08       | 1.03      | 1.23        | -1.07      | -1.30        | -2.11      | -2.34        | -1.47      | -1.61        |
| 242073_at   | ---        | ---                  | 0                                    | ---     | 1.30          | 1.41            | 1.13      | 1.10        | -1.00     | -1.01       | 1.15       | 1.10         | 1.62       | 1.40         | 1.34       | 1.23         |
| 242080_at   | ---        | ---                  | 0                                    | ---     | -1.41         | -1.16           | 1.15      | -1.45       | -1.36     | 1.37        | -2.59      | -1.26        | -2.43      | -2.27        | -2.57      | -1.62        |
| 242089_at   | ---        | ---                  | 0                                    | ---     | -1.05         | -1.03           | 1.07      | -1.13       | -1.19     | -1.25       | -1.56      | -1.29        | -1.90      | -1.63        | -2.19      | -2.49        |
| 242096_at   | ---        | ---                  | 0                                    | ---     | 1.06          | -2.11           | 1.46      | 1.16        | -1.04     | 1.34        | -1.47      | 1.02         | -1.52      | -2.42        | -3.61      | -5.29        |
| 242099_at   | ---        | ---                  | 0                                    | ---     | -3.03         | -1.60           | 1.79      | 1.96        | 3.14      | 2.18        | -3.01      | 1.21         | -14.47     | -3.88        | -3.64      | -5.80        |
| 242117_at   | ---        | ---                  | 0                                    | ---     | 1.25          | 1.28            | 1.26      | 1.08        | 1.13      | 1.39        | 1.28       | 1.06         | -1.27      | -1.23        | -2.18      | -3.10        |
| 242121_at   | ---        | ---                  | 0                                    | ---     | 1.17          | 1.15            | 1.04      | -1.04       | 1.04      | 1.14        | -1.39      | -1.18        | -2.92      | -2.80        | -2.21      | -2.18        |
| 242133_s_at | ---        | ---                  | 0                                    | ---     | 1.06          | 1.06            | 1.02      | 1.25        | 1.32      | 1.25        | -1.39      | 1.00         | -1.34      | -1.81        | -2.04      | -1.42        |
| 242143_at   | ---        | ---                  | 0                                    | ---     | 1.44          | 1.36            | -1.00     | -1.06       | 1.52      | 1.55        | 1.04       | -1.25        | -2.62      | -1.84        | -1.78      | -1.91        |
| 242156_at   | ---        | ---                  | 0                                    | ---     | 1.47          | 1.01            | -1.06     | 1.29        | 1.47      | 1.72        | -1.26      | -1.00        | -2.71      | -2.21        | -2.51      | -3.56        |
| 242160_at   | ---        | ---                  | 0                                    | ---     | 1.29          | 1.04            | 1.08      | 1.54        | 1.18      | 1.39        | 1.20       | -1.12        | 1.10       | 1.41         | 1.50       | 2.13         |
| 242174_at   | ---        | ---                  | 0                                    | ---     | 1.53          | 1.43            | -1.43     | -1.30       | 1.39      | -1.17       | -2.01      | -1.02        | 10.43      | 3.69         | 1.01       | 1.06         |
| 242188_at   | ---        | ---                  | 0                                    | ---     | -1.67         | 1.24            | 1.28      | -4.35       | 6.52      | 5.83        | -2.33      | -1.12        | -2.35      | -3.52        | -1.91      | -1.40        |
| 242190_at   | ---        | ---                  | 0                                    | ---     | -1.13         | -1.02           | -1.72     | -1.54       | 1.28      | 1.80        | 1.28       | -1.53        | -3.22      | -2.59        | -1.33      | -1.02        |
| 242194_at   | ---        | ---                  | 0                                    | ---     | 1.20          | -1.11           | 1.08      | 1.07        | 1.15      | 1.16        | 1.45       | 1.17         | -1.09      | -1.21        | -1.96      | -1.69        |
| 242202_at   | ---        | ---                  | 0                                    | ---     | 1.40          | 1.52            | 1.71      | 1.74        | 1.71      | 1.27        | 1.09       | 1.17         | -1.06      | 1.39         | 1.32       | 2.11         |
| 242205_at   | ---        | ---                  | 0                                    | ---     | -1.20         | 1.12            | 1.01      | 1.05        | 1.42      | 1.31        | -1.17      | 1.11         | -1.02      | 1.78         | -1.96      | -1.57        |
| 242216_at   | ---        | ---                  | 0                                    | ---     | -1.32         | 1.33            | 1.50      | 1.54        | -1.60     | -1.25       | -1.44      | -1.24        | 1.67       | 1.01         | 4.88       | 7.53         |
| 242219_at   | ---        | ---                  | 0                                    | ---     | 2.08          | -2.40           | 2.39      | 1.86        | -3.74     | -1.22       | 1.79       | 1.45         | -3.13      | -1.34        | -1.45      | 1.49         |
| 242221_at   | ---        | ---                  | 0                                    | ---     | 1.09          | 1.00            | -1.82     | 1.63        | 1.05      | -2.04       | 1.14       | 1.13         | 1.23       | -2.17        | -2.40      | 1.09         |
| 242227_at   | ---        | ---                  | 0                                    | ---     | 1.18          | -1.07           | 1.57      | 1.71        | -1.24     | 1.15        | 1.58       | 4.55         | 5.16       | -1.04        | 2.56       | 2.83         |
| 242228_at   | ---        | ---                  | 0                                    | ---     | 1.38          | 1.40            | 1.23      | 1.10        | -1.20     | -1.10       | 1.18       | 1.06         | -1.80      | -1.62        | -2.61      | -4.12        |
| 242233_at   | ---        | ---                  | 0                                    | ---     | 1.43          | 1.07            | -1.06     | 1.09        | 1.08      | 1.25        | -1.21      | -1.30        | -1.88      | -1.90        | -1.76      | -1.73        |
| 242235_x_at | ---        | ---                  | 0                                    | ---     | 1.42          | 1.26            | 1.07      | 1.17        | 1.06      | 1.13        | 1.06       | 1.08         | -1.57      | -1.47        | -1.65      | -1.56        |
| 242240_at   | ---        | ---                  | 0                                    | ---     | 1.31          | 1.21            | 1.09      | 1.21        | 1.10      | 1.12        | 1.24       | 1.06         | -1.90      | -1.72        | -1.72      | -1.37        |
| 242245_at   | ---        | ---                  | 0                                    | ---     | 1.04          | 1.09            | 1.12      | 1.17        | 1.01      | 1.03        | 1.01       | -1.18        | -1.46      | -1.46        | -1.22      | -1.33        |
| 242252_at   | ---        | ---                  | 0                                    | ---     | 1.20          | 1.23            | -1.10     | 1.65        | -1.41     | -1.24       | -1.44      | -2.63        | 8.33       | 10.67        | 3.22       | 5.58         |
| 242256_x_at | ---        | ---                  | 0                                    | ---     | -1.25         | -1.50           | -1.64     | -1.22       | 1.15      | 1.18        | -1.07      | -1.02        | -1.44      | -1.29        | -1.56      | -1.80        |
| 242258_at   | ---        | ---                  | 0                                    | ---     | 1.26          | 1.02            | -1.12     | -1.02       | 1.24      | 1.21        | -1.51      | -1.22        | -2.14      | -2.00        | -2.52      | -2.11        |
| 242264_at   | ---        | ---                  | 0                                    | ---     | -1.14         | -1.12           | 1.08      | 1.10        | -1.14     | -1.07       | -1.08      | 1.04         | -2.53      | -1.95        | -2.58      | -2.57        |
| 242270_at   | ---        | ---                  | 0                                    | ---     | -1.20         | -1.53           | 1.04      | -1.67       | -1.19     | 1.01        | 1.10       | -1.08        | -2.95      | -2.04        | -2.19      | -1.74        |
| 242273_at   | ---        | ---                  | 0                                    | ---     | -1.25         | -1.18           | 1.39      | 1.00        | 1.04      | 1.14        | -1.79      | -1.27        | -3.51      | -2.69        | -2.63      | -5.11        |
| 242275_at   | ---        | ---                  | 0                                    | ---     | -1.09         | 1.08            | 2.33      | 2.19        | -1.43     | -1.18       | -1.52      | 1.57         | 1.52       | 1.43         | 1.43       | -1.55        |
| 242289_at   | ---        | ---                  | 0                                    | ---     | -1.25         | 1.16            | 1.18      | -1.19       | 1.18      | 1.17        | 1.08       | 1.08         | -1.71      | -1.45        | -4.57      | -2.88        |
| 242299_at   | ---        | ---                  | 0                                    | ---     | 1.53          | 3.69            | 1.35      | 1.11        | -1.35     | -1.00       | -1.88      | -1.86        | -8.69      | -6.82        | 1.12       | 1.12         |

| ID          | Gene Title | Chromosomal Location | 1st Gene Ontology Biological Process | Pathway | A2497 30 mins | A2497P' 30 mins | A2497 2 h | A2497P' 2 h | A2497 4 h | A2497P' 4 h | A2497 24 h | A2497P' 24 h | A2497 48 h | A2497P' 48 h | A2497 72 h | A2497P' 72 h |
|-------------|------------|----------------------|--------------------------------------|---------|---------------|-----------------|-----------|-------------|-----------|-------------|------------|--------------|------------|--------------|------------|--------------|
| 242300_at   | ---        | ---                  | 0                                    | ---     | 1.02          | -1.01           | -1.01     | 1.11        | -1.04     | -1.03       | -1.47      | -1.38        | -2.59      | -2.03        | -2.62      | -3.49        |
| 242320_at   | ---        | ---                  | 0                                    | ---     | 1.11          | 1.07            | -1.05     | -1.17       | -1.11     | -1.02       | -1.31      | -1.10        | -2.55      | -2.56        | -1.82      | -1.40        |
| 242337_at   | ---        | ---                  | 0                                    | ---     | 1.11          | -1.09           | 1.12      | 1.26        | 1.27      | 1.15        | 1.11       | -1.09        | -1.66      | -1.74        | -2.20      | -1.91        |
| 242340_at   | ---        | ---                  | 0                                    | ---     | 3.28          | 2.74            | 1.25      | 1.05        | 1.09      | -2.04       | -1.35      | -1.37        | 1.12       | -2.60        | 1.20       | -1.66        |
| 242343_x_at | ---        | ---                  | 0                                    | ---     | 1.40          | 1.15            | 1.09      | -1.16       | -1.21     | 1.04        | -1.23      | -1.23        | -2.00      | -1.87        | -1.79      | -2.11        |
| 242369_x_at | ---        | ---                  | 0                                    | ---     | 1.37          | 1.43            | -1.25     | -1.14       | -1.13     | 1.27        | -1.65      | -1.09        | -1.33      | -1.71        | -1.12      | -1.38        |
| 242390_at   | ---        | ---                  | 0                                    | ---     | -1.66         | -1.37           | -1.21     | 1.03        | -1.09     | 1.32        | -1.68      | -1.35        | -3.04      | -1.53        | -1.89      | -3.04        |
| 242391_at   | ---        | ---                  | 0                                    | ---     | -1.39         | 1.33            | -1.23     | -1.40       | -1.06     | -1.39       | -1.01      | 1.08         | -3.50      | -2.88        | -1.15      | 1.72         |
| 242404_at   | ---        | ---                  | 0                                    | ---     | 1.06          | -1.13           | 1.09      | -1.04       | -1.40     | -1.12       | 1.01       | 1.12         | -1.36      | -1.50        | -2.24      | -2.45        |
| 242419_at   | ---        | ---                  | 0                                    | ---     | -1.69         | -1.75           | 1.66      | 1.38        | 1.47      | -1.02       | 1.26       | -1.08        | -1.39      | -1.03        | 5.24       | -1.29        |
| 242420_at   | ---        | ---                  | 0                                    | ---     | -1.06         | 1.03            | 1.61      | 1.28        | 1.25      | 1.08        | -1.38      | 1.00         | -1.67      | -1.24        | -1.39      | -2.46        |
| 242423_x_at | ---        | ---                  | 0                                    | ---     | 1.09          | 1.17            | 1.03      | 1.14        | 1.12      | 1.10        | 1.00       | -1.04        | -1.46      | -1.25        | -1.50      | -1.34        |
| 242424_at   | ---        | ---                  | 0                                    | ---     | -1.13         | 1.13            | 1.35      | 1.08        | 1.99      | 1.36        | 1.12       | -1.07        | -2.22      | -1.51        | -3.05      | -2.57        |
| 242425_at   | ---        | ---                  | 0                                    | ---     | 1.01          | -1.05           | 1.12      | 1.01        | 1.12      | 1.15        | -1.23      | -1.30        | -1.66      | -1.45        | -2.89      | -2.00        |
| 242428_at   | ---        | ---                  | 0                                    | ---     | 1.11          | 1.01            | -1.03     | 1.02        | 1.22      | 1.33        | -1.30      | -1.40        | -1.96      | -1.66        | -2.33      | -1.88        |
| 242440_at   | ---        | ---                  | 0                                    | ---     | 1.12          | -1.04           | 1.06      | 1.03        | 1.03      | 1.14        | -1.11      | 1.14         | -2.05      | -2.09        | -1.69      | -1.47        |
| 242441_at   | ---        | ---                  | 0                                    | ---     | -1.06         | -1.12           | -2.54     | -1.46       | -3.20     | -1.52       | 2.39       | 2.00         | -1.19      | -1.33        | 1.96       | 2.11         |
| 242454_at   | ---        | ---                  | 0                                    | ---     | 1.77          | -1.08           | -1.40     | -1.07       | -1.13     | 1.87        | 1.80       | -1.81        | -1.40      | -1.99        | -1.72      | 1.18         |
| 242457_at   | ---        | ---                  | 0                                    | ---     | 1.52          | 1.16            | 1.17      | 1.05        | 1.16      | 1.11        | 1.41       | 1.17         | -1.77      | -1.36        | -1.42      | -1.48        |
| 242459_at   | ---        | ---                  | 0                                    | ---     | 1.04          | -2.39           | 1.28      | -3.40       | -2.68     | -1.78       | 1.77       | 1.23         | -2.07      | -1.34        | -1.05      | -2.16        |
| 242466_at   | ---        | ---                  | 0                                    | ---     | 5.37          | 3.81            | 1.29      | 1.16        | -1.23     | 1.02        | 1.14       | -1.68        | 19.19      | 6.04         | 10.18      | 7.34         |
| 242467_at   | ---        | ---                  | 0                                    | ---     | 1.07          | -1.44           | 1.13      | 1.07        | 2.24      | 2.06        | -1.27      | 1.15         | -1.39      | -1.55        | -1.83      | -1.47        |
| 242471_at   | ---        | ---                  | 0                                    | ---     | 1.16          | -1.36           | 1.09      | -1.08       | 1.01      | 1.00        | -1.39      | -1.19        | -2.55      | -2.07        | -2.27      | -1.88        |
| 242475_at   | ---        | ---                  | 0                                    | ---     | -1.09         | -1.66           | 1.77      | -2.39       | -1.50     | -1.75       | 2.36       | 1.16         | -1.43      | -1.06        | -2.00      | -1.36        |
| 242476_at   | ---        | ---                  | 0                                    | ---     | -1.07         | -1.22           | 1.14      | 1.04        | 1.18      | 1.30        | -1.10      | -1.29        | -2.51      | -1.89        | -2.55      | -2.33        |
| 242486_at   | ---        | ---                  | 0                                    | ---     | 1.46          | 1.24            | 1.29      | 1.17        | 1.26      | 1.32        | -1.19      | -1.03        | -4.73      | -2.16        | -5.69      | -5.18        |
| 242490_at   | ---        | ---                  | 0                                    | ---     | -1.06         | -1.20           | 1.01      | -1.09       | 1.17      | 1.13        | -1.55      | -1.22        | -4.00      | -2.39        | -2.07      | -1.59        |
| 242523_at   | ---        | ---                  | 0                                    | ---     | 1.14          | -1.14           | 1.06      | 1.08        | 1.33      | 1.04        | -1.05      | 1.29         | -1.98      | -1.36        | -2.38      | -1.60        |
| 242538_at   | ---        | ---                  | 0                                    | ---     | 1.04          | 1.16            | -1.06     | -1.13       | -1.00     | -1.07       | -1.13      | -1.03        | -1.30      | -1.49        | -1.40      | -1.60        |
| 242547_at   | ---        | ---                  | 0                                    | ---     | 6.63          | 4.33            | 3.06      | 7.41        | -3.60     | -1.61       | -2.42      | 1.47         | 2.83       | 2.88         | -2.09      | 1.00         |
| 242556_at   | ---        | ---                  | 0                                    | ---     | 1.30          | 1.37            | -1.01     | -1.07       | 1.17      | 1.18        | 1.05       | 1.00         | -2.07      | -1.30        | -2.09      | -1.99        |
| 242558_at   | ---        | ---                  | 0                                    | ---     | 1.10          | 1.07            | -1.14     | -1.19       | 1.09      | 1.18        | 1.12       | -1.12        | -1.57      | -1.74        | -1.40      | -1.83        |
| 242562_at   | ---        | ---                  | 0                                    | ---     | 1.40          | 1.44            | 1.57      | 1.57        | 1.09      | 1.19        | -1.93      | -1.28        | -1.42      | -1.70        | -2.36      | -1.57        |
| 242568_s_at | ---        | ---                  | 0                                    | ---     | 1.10          | -1.12           | -1.23     | -1.04       | 1.06      | 1.03        | 1.31       | 1.55         | 1.11       | 1.00         | -2.30      | -1.87        |
| 242573_at   | ---        | ---                  | 0                                    | ---     | -1.13         | 1.04            | -1.01     | -1.05       | 1.48      | 1.26        | 1.16       | 1.13         | -2.32      | -2.05        | -2.11      | -2.49        |
| 242576_x_at | ---        | ---                  | 0                                    | ---     | -1.17         | -1.09           | 1.30      | 1.00        | 1.35      | 1.25        | 1.33       | -1.09        | -1.66      | -1.40        | -2.48      | -1.53        |
| 242580_at   | ---        | ---                  | 0                                    | ---     | -1.09         | -1.43           | -1.06     | -1.08       | 1.27      | 1.48        | 1.30       | 1.01         | 1.72       | 2.27         | 2.84       | 2.32         |
| 242590_at   | ---        | ---                  | 0                                    | ---     | -1.06         | 1.06            | 1.12      | 1.11        | -1.02     | 1.02        | -1.27      | -1.09        | -2.54      | -1.90        | -3.99      | -2.96        |
| 242607_at   | ---        | ---                  | 0                                    | ---     | 1.39          | -1.04           | -1.23     | 1.02        | 1.03      | 1.11        | -1.52      | -1.30        | -1.85      | -1.68        | -3.64      | -3.20        |
| 242610_x_at | ---        | ---                  | 0                                    | ---     | 1.27          | 1.29            | 1.28      | 1.01        | 1.39      | 1.36        | -1.55      | 1.24         | -1.20      | -1.70        | -1.21      | -1.19        |
| 242611_at   | ---        | ---                  | 0                                    | ---     | -1.73         | -1.91           | 1.22      | 1.04        | -1.02     | 1.16        | -1.44      | -1.07        | -2.55      | -1.68        | -2.08      | -1.48        |
| 242627_at   | ---        | ---                  | 0                                    | ---     | 1.02          | -1.13           | -1.03     | 1.50        | -1.22     | -1.13       | -1.90      | -1.54        | -1.74      | -1.31        | 1.23       | 1.10         |
| 242630_at   | ---        | ---                  | 0                                    | ---     | 1.21          | 1.24            | 1.21      | 1.61        | 1.47      | 1.43        | -1.57      | -1.61        | -3.13      | -2.53        | -3.37      | -2.41        |
| 242637_at   | ---        | ---                  | 0                                    | ---     | -1.04         | -1.22           | 1.32      | 1.42        | -1.08     | 1.16        | 1.05       | -1.33        | -2.46      | -1.88        | -1.77      | -2.33        |
| 242651_at   | ---        | ---                  | 0                                    | ---     | -1.88         | 1.16            | -1.17     | -2.32       | -1.67     | -1.09       | 1.25       | -1.14        | 1.28       | -1.35        | -2.90      | -1.97        |
| 242671_at   | ---        | ---                  | 0                                    | ---     | -1.16         | -1.12           | -1.13     | -1.20       | -1.33     | 1.31        | -1.24      | -1.23        | -2.95      | -3.16        | -1.92      | -1.79        |
| 242673_at   | ---        | ---                  | 0                                    | ---     | -1.02         | 1.06            | 1.10      | 1.21        | 1.35      | 1.14        | 1.13       | 1.04         | -1.45      | -1.40        | -1.49      | -1.27        |
| 242688_at   | ---        | ---                  | 0                                    | ---     | -1.13         | -1.34           | 1.09      | -1.10       | 1.15      | 1.10        | -1.15      | -1.10        | -2.15      | -1.92        | -1.86      | -1.82        |
| 242696_at   | ---        | ---                  | 0                                    | ---     | 1.12          | 1.29            | 1.16      | 1.08        | 1.24      | 1.20        | 1.11       | -1.13        | -1.34      | -1.72        | -1.49      | -1.18        |
| 242709_s_at | ---        | ---                  | 0                                    | ---     | 1.17          | 1.03            | -1.06     | 1.04        | 1.01      | 1.16        | -1.56      | -1.14        | -1.98      | -2.10        | -3.35      | -2.21        |
| 242710_at   | ---        | ---                  | 0                                    | ---     | 1.37          | 1.02            | -1.03     | -1.10       | -1.24     | 1.50        | 1.00       | 1.01         | -2.81      | -2.59        | -1.66      | -1.00        |
| 242724_x_at | ---        | ---                  | 0                                    | ---     | -1.24         | -1.09           | 1.12      | 1.03        | -1.11     | 1.03        | -1.20      | -1.19        | -2.79      | -2.50        | -2.96      | -2.04        |
| 242725_at   | ---        | ---                  | 0                                    | ---     | 1.07          | 1.08            | -1.00     | 1.09        | 1.24      | 1.13        | 1.23       | -1.01        | 1.12       | 1.00         | -1.10      | 1.12         |
| 242728_at   | ---        | ---                  | 0                                    | ---     | 1.24          | 1.16            | -1.24     | -2.10       | -1.04     | 1.09        | 1.31       | -1.04        | -1.22      | 1.37         | -2.61      | -1.61        |
| 242737_at   | ---        | ---                  | 0                                    | ---     | 1.33          | -1.41           | -1.97     | -1.61       | -1.61     | -1.37       | -1.10      | -1.37        | -1.02      | -1.09        | -3.16      | -6.18        |
| 242740_at   | ---        | ---                  | 0                                    | ---     | 1.05          | 1.08            | -1.05     | 1.03        | 1.04      | 1.19        | 1.19       | 1.19         | -1.17      | -1.09        | -1.63      | -1.40        |
| 242751_at   | ---        | ---                  | 0                                    | ---     | 1.11          | -1.03           | -1.06     | -1.23       | 1.62      | 1.63        | -1.40      | -1.47        | -2.99      | -2.36        | -1.84      | -1.55        |
| 242768_at   | ---        | ---                  | 0                                    | ---     | 1.09          | 1.21            | -1.31     | -1.15       | -1.37     | -1.22       | -1.71      | -1.14        | -1.46      | -2.16        | 4.50       | 1.75         |
| 242769_at   | ---        | ---                  | 0                                    | ---     | -1.13         | -1.56           | 1.16      | 1.32        | -1.17     | -1.27       | -1.41      | -1.41        | -3.34      | -3.45        | -5.44      | -4.61        |
| 242772_x_at | ---        | ---                  | 0                                    | ---     | 1.53          | 1.04            | -1.52     | -1.31       | 1.59      | 1.48        | -1.25      | -1.25        | -1.40      | -1.01        | -2.10      | -1.38        |
| 242775_at   | ---        | ---                  | 0                                    | ---     | 1.60          | 1.30            | 1.08      | 1.10        | -1.28     | 1.16        | -1.24      | -1.43        | -1.23      | 1.05         | -2.70      | -2.44        |
| 242801_at   | ---        | ---                  | 0                                    | ---     | 1.43          | 1.51            | 1.45      | 1.43        | 1.11      | -1.25       | 1.03       | -1.35        | -4.20      | -2.01        | -5.44      | -18.67       |
| 242803_at   | ---        | ---                  | 0                                    | ---     | 7.10          | 4.01            | -1.62     | -1.62       | -1.39     | -1.36       | 1.44       | 1.91         | -1.54      | -1.36        | 1.02       | 2.81         |
| 242818_x_at | ---        | ---                  | 0                                    | ---     | 1.37          | 1.02            | -1.01     | -1.20       | -1.10     | -1.08       | -1.32      | 1.08         | -2.27      | -2.33        | -3.04      | -3.18        |
| 242824_at   | ---        | ---                  | 0                                    | ---     | 1.06          | 1.03            | 1.24      | 1.06        | 1.05      | 1.15        | 1.15       | 1.04         | -1.90      | -2.02        | -2.05      | -1.38        |
| 242829_x_at | ---        | ---                  | 0                                    | ---     | 1.06          | -1.06           | 1.04      | -1.08       | 1.03      | 1.07        | -1.21      | -1.25        | -1.74      | -1.55        | -1.34      | -1.24        |

| ID          | Gene Title | Chromosomal Location | 1st Gene Ontology Biological Process | Pathway | A2497 30 mins | A2497P' 30 mins | A2497 2 h | A2497P' 2 h | A2497 4 h | A2497P' 4 h | A2497 24 h | A2497P' 24 h | A2497 48 h | A2497P' 48 h | A2497 72 h | A2497P' 72 h |
|-------------|------------|----------------------|--------------------------------------|---------|---------------|-----------------|-----------|-------------|-----------|-------------|------------|--------------|------------|--------------|------------|--------------|
| 242834_at   | ---        | ---                  | 0                                    | ---     | 1.57          | 1.23            | 1.10      | 1.16        | 1.29      | 1.41        | -1.59      | 1.03         | 1.76       | 1.60         | 1.46       | 1.53         |
| 242839_at   | ---        | ---                  | 0                                    | ---     | 1.24          | 1.33            | 1.27      | 1.19        | 1.07      | 1.24        | -1.04      | -1.11        | -2.67      | -2.54        | -2.26      | -1.91        |
| 242840_at   | ---        | ---                  | 0                                    | ---     | 1.21          | 1.62            | -1.25     | 1.05        | -2.98     | 1.22        | 2.33       | 1.73         | 5.49       | 11.52        | -1.11      | 1.08         |
| 242842_at   | ---        | ---                  | 0                                    | ---     | 1.12          | 1.03            | 1.00      | -1.01       | 1.05      | 1.08        | -1.27      | -1.20        | -1.39      | -1.30        | -1.36      | -1.46        |
| 242850_at   | ---        | ---                  | 0                                    | ---     | 1.05          | -1.01           | 1.07      | -1.00       | 1.06      | -1.03       | 1.19       | 1.02         | -1.11      | 1.06         | 1.09       | 1.21         |
| 242853_at   | ---        | ---                  | 0                                    | ---     | 1.08          | 1.02            | -1.24     | 1.01        | 1.59      | 1.37        | 1.18       | -1.10        | -1.47      | -1.38        | -1.60      | -1.04        |
| 242859_at   | ---        | ---                  | 0                                    | ---     | 1.21          | 1.08            | 1.06      | -1.04       | -1.00     | 1.31        | -1.68      | -1.04        | -2.39      | -2.23        | -1.49      | -2.58        |
| 242862_x_at | ---        | ---                  | 0                                    | ---     | 1.30          | 1.13            | -1.27     | -1.09       | 1.14      | 1.15        | -1.07      | -1.17        | -1.74      | -1.21        | -1.64      | -1.44        |
| 242868_at   | ---        | ---                  | 0                                    | ---     | 1.19          | 1.00            | -1.13     | 1.06        | 1.30      | 1.35        | 1.31       | -1.01        | 1.40       | 1.38         | -1.14      | 1.13         |
| 242878_at   | ---        | ---                  | 0                                    | ---     | -1.50         | -1.17           | 1.28      | 1.17        | 1.24      | 1.09        | -1.69      | -1.10        | -2.56      | -2.07        | -2.40      | -2.23        |
| 242885_at   | ---        | ---                  | 0                                    | ---     | -1.44         | -1.97           | 2.26      | 2.86        | 2.09      | 3.14        | 7.41       | 1.19         | -2.65      | -19.77       | 1.24       | -1.30        |
| 242886_at   | ---        | ---                  | 0                                    | ---     | -1.61         | -1.42           | 1.25      | 1.15        | 1.28      | 1.13        | 1.05       | -1.00        | -3.01      | -3.79        | -1.46      | -1.25        |
| 242890_at   | ---        | ---                  | 0                                    | ---     | -1.04         | 1.02            | -1.12     | -1.20       | -1.24     | -1.03       | -1.37      | -1.08        | -1.87      | -1.41        | -2.25      | -2.23        |
| 242901_at   | ---        | ---                  | 0                                    | ---     | -1.10         | 1.12            | -1.30     | -1.03       | -1.95     | 1.27        | 1.23       | 1.02         | 1.08       | -1.31        | 1.55       | 1.20         |
| 242909_at   | ---        | ---                  | 0                                    | ---     | -1.10         | -1.30           | -1.02     | 1.07        | -1.05     | 1.10        | -1.12      | 1.18         | -2.20      | -2.19        | -2.22      | -2.12        |
| 242928_at   | ---        | ---                  | 0                                    | ---     | 1.02          | 1.48            | -1.13     | 1.31        | 1.03      | -1.05       | -1.26      | -1.53        | -1.79      | -1.41        | -2.26      | -2.92        |
| 242947_at   | ---        | ---                  | 0                                    | ---     | -1.04         | -1.23           | 1.01      | 1.04        | 1.12      | 1.01        | -1.04      | 1.01         | -1.09      | -1.12        | -1.66      | -1.31        |
| 242981_at   | ---        | ---                  | 0                                    | ---     | 1.00          | -1.15           | 1.26      | 1.30        | -1.10     | -1.04       | -1.27      | -1.13        | -1.89      | -1.61        | -3.83      | -3.27        |
| 243002_at   | ---        | ---                  | 0                                    | ---     | -1.07         | -4.37           | 1.59      | 1.09        | 3.91      | 3.01        | -1.75      | -1.16        | -5.60      | -3.59        | -3.43      | -1.93        |
| 243003_at   | ---        | ---                  | 0                                    | ---     | 1.20          | 1.14            | -1.10     | -1.18       | 1.37      | 1.20        | 1.17       | 1.05         | -1.78      | -1.90        | -2.00      | -2.34        |
| 243004_at   | ---        | ---                  | 0                                    | ---     | -1.55         | -1.12           | -1.27     | 1.85        | 2.88      | 3.04        | -1.13      | -1.08        | 1.24       | 1.00         | -1.10      | 1.35         |
| 243005_at   | ---        | ---                  | 0                                    | ---     | -1.05         | -1.57           | -1.50     | -1.58       | 1.48      | 1.42        | -1.44      | -1.24        | -2.73      | -1.93        | -1.46      | -2.15        |
| 243016_at   | ---        | ---                  | 0                                    | ---     | 1.10          | -1.13           | 1.13      | 1.25        | 1.09      | 1.38        | 1.17       | 1.11         | -3.38      | -2.15        | -2.33      | -2.19        |
| 243023_at   | ---        | ---                  | 0                                    | ---     | 1.19          | 1.17            | 1.01      | 1.02        | -1.18     | 1.24        | -1.77      | -1.39        | -3.25      | -1.86        | -8.09      | -6.11        |
| 243039_at   | ---        | ---                  | 0                                    | ---     | 3.93          | 2.86            | 2.25      | 2.14        | 1.97      | 2.08        | -3.86      | -3.11        | -1.52      | -1.08        | 5.26       | 5.25         |
| 243041_s_at | ---        | ---                  | 0                                    | ---     | -1.07         | 1.01            | 1.05      | 1.01        | 1.15      | 1.15        | -1.09      | 1.12         | -1.58      | -1.40        | -1.86      | -1.91        |
| 243046_at   | ---        | ---                  | 0                                    | ---     | 1.10          | 1.12            | 1.16      | -1.18       | 1.15      | 1.21        | 1.13       | 1.11         | -2.24      | -1.47        | -1.60      | -2.07        |
| 243064_at   | ---        | ---                  | 0                                    | ---     | -1.17         | 1.53            | 1.09      | -1.21       | -1.27     | -1.31       | 1.09       | 1.34         | -1.67      | -1.29        | -2.75      | -2.71        |
| 243069_at   | ---        | ---                  | 0                                    | ---     | 1.06          | 1.00            | -1.12     | -1.04       | -1.35     | 1.09        | 1.11       | 1.03         | -1.75      | -1.21        | -3.45      | -3.83        |
| 243071_at   | ---        | ---                  | 0                                    | ---     | 1.01          | -1.03           | -1.00     | 1.04        | 1.17      | 1.13        | -1.38      | -1.06        | -1.88      | -1.31        | -1.32      | -1.70        |
| 243072_at   | ---        | ---                  | 0                                    | ---     | -1.45         | 1.32            | -1.58     | -1.01       | 1.32      | 1.42        | -3.47      | -2.02        | -1.71      | -3.58        | -1.95      | -4.55        |
| 243074_at   | ---        | ---                  | 0                                    | ---     | -1.22         | -1.23           | -1.47     | -1.63       | 1.34      | 1.26        | 1.04       | -1.24        | -1.18      | 1.03         | -1.75      | -1.84        |
| 243102_at   | ---        | ---                  | 0                                    | ---     | 1.57          | -1.47           | 1.43      | 1.94        | 1.29      | -1.46       | 1.02       | -1.02        | -1.40      | -2.53        | -4.55      | -2.24        |
| 243114_at   | ---        | ---                  | 0                                    | ---     | 1.96          | 4.10            | 1.46      | 1.13        | 1.77      | 1.36        | -1.27      | -1.29        | -2.81      | -14.96       | -1.70      | -1.87        |
| 243115_at   | ---        | ---                  | 0                                    | ---     | 1.16          | 2.12            | 1.03      | -1.13       | 2.24      | 1.54        | 1.44       | 1.53         | 2.62       | -1.50        | 3.95       | 3.42         |
| 243117_at   | ---        | ---                  | 0                                    | ---     | -1.00         | -1.08           | -1.49     | -1.20       | -1.76     | -1.37       | 1.63       | 1.01         | 1.76       | 1.42         | 1.58       | 1.07         |
| 243154_at   | ---        | ---                  | 0                                    | ---     | 1.08          | -1.60           | 1.68      | 3.30        | 1.21      | 1.13        | 1.81       | 3.05         | 1.66       | 1.25         | 1.39       | -1.09        |
| 243174_at   | ---        | ---                  | 0                                    | ---     | -1.02         | -1.10           | 1.61      | 1.85        | -1.29     | 1.44        | 1.04       | -4.92        | 1.41       | -1.30        | -1.18      | -1.37        |
| 243179_at   | ---        | ---                  | 0                                    | ---     | -1.20         | 1.06            | 1.03      | 1.34        | -1.02     | 1.33        | -1.10      | 1.02         | -2.17      | -1.75        | -1.82      | -2.00        |
| 243203_at   | ---        | ---                  | 0                                    | ---     | 1.48          | 1.25            | 1.05      | -1.11       | -1.28     | -1.19       | 1.19       | 1.15         | -2.97      | -2.42        | -2.81      | -1.70        |
| 243211_at   | ---        | ---                  | 0                                    | ---     | 1.28          | -1.09           | 1.30      | -1.06       | 1.06      | 1.66        | -1.08      | -1.08        | -1.38      | -1.12        | 1.31       | 1.07         |
| 243229_at   | ---        | ---                  | 0                                    | ---     | 1.62          | 1.75            | 1.15      | 1.49        | -1.03     | -1.00       | -1.16      | -1.04        | -1.87      | -1.19        | -3.18      | -1.43        |
| 243246_at   | ---        | ---                  | 0                                    | ---     | -1.31         | -1.39           | 1.25      | 1.35        | 1.01      | 1.20        | 1.30       | 1.43         | -1.16      | -1.26        | -1.42      | -1.42        |
| 243249_at   | ---        | ---                  | 0                                    | ---     | 1.20          | 1.14            | 1.14      | 1.31        | 1.37      | 1.51        | -1.23      | 1.30         | -2.45      | -2.25        | -1.47      | -1.14        |
| 243250_at   | ---        | ---                  | 0                                    | ---     | 1.06          | -1.63           | -1.21     | -1.74       | 1.03      | 1.36        | 4.84       | 2.15         | 2.22       | -1.52        | 1.61       | 2.04         |
| 243252_at   | ---        | ---                  | 0                                    | ---     | 2.10          | 1.45            | 1.09      | 1.00        | -1.05     | 1.05        | -1.31      | 1.12         | -1.44      | 1.02         | -1.35      | -2.87        |
| 243257_at   | ---        | ---                  | 0                                    | ---     | -8.43         | 1.60            | -1.41     | 5.74        | -6.11     | -5.23       | 3.34       | -2.29        | 1.57       | 1.58         | 4.50       | 2.86         |
| 243286_at   | ---        | ---                  | 0                                    | ---     | 1.22          | 1.03            | -1.03     | -1.05       | 1.04      | 1.17        | 1.04       | -1.07        | 1.83       | -1.87        | -1.73      | -1.90        |
| 243299_at   | ---        | ---                  | 0                                    | ---     | 1.23          | 1.26            | 1.13      | -1.01       | 1.04      | -1.18       | -1.07      | 1.24         | 1.24       | 1.23         | 2.21       | 1.34         |
| 243303_at   | ---        | ---                  | 0                                    | ---     | 1.45          | 1.39            | 1.22      | -1.16       | 1.03      | 1.03        | -1.52      | 1.08         | -3.28      | -1.79        | -1.88      | -2.40        |
| 243305_at   | ---        | ---                  | 0                                    | ---     | 1.27          | 1.04            | 1.15      | 1.24        | 1.20      | 1.44        | 1.09       | -1.05        | -1.90      | -1.97        | -3.52      | -3.32        |
| 243307_at   | ---        | ---                  | 0                                    | ---     | 1.33          | 1.27            | -1.20     | -1.00       | 1.12      | -1.09       | -1.55      | 3.40         | 2.42       | 2.99         | 2.61       |              |
| 243308_at   | ---        | ---                  | 0                                    | ---     | 1.05          | 1.14            | -1.05     | -1.08       | -1.11     | 1.14        | -1.03      | 1.19         | -1.67      | -1.27        | -2.03      | -1.57        |
| 243310_at   | ---        | ---                  | 0                                    | ---     | -1.70         | -2.00           | 1.09      | -1.14       | 1.11      | 1.33        | -1.38      | -1.17        | -4.48      | -4.79        | -2.98      | -2.83        |
| 243315_at   | ---        | ---                  | 0                                    | ---     | -1.41         | -1.37           | 1.11      | 1.09        | 1.23      | 1.19        | 1.26       | -1.27        | -3.08      | -1.39        | -1.80      | -1.49        |
| 243325_at   | ---        | ---                  | 0                                    | ---     | 2.48          | 10.02           | -1.68     | -1.29       | -1.26     | 1.30        | 1.82       | -2.02        | -4.18      | -2.36        | 1.35       | -1.58        |
| 243329_at   | ---        | ---                  | 0                                    | ---     | -1.03         | 1.16            | -1.06     | 1.15        | 1.20      | 1.24        | -1.11      | -1.32        | -2.25      | -2.29        | -1.52      | -1.41        |
| 243333_at   | ---        | ---                  | 0                                    | ---     | -1.48         | -1.66           | -1.28     | 1.23        | -1.02     | 1.43        | 1.84       | 1.66         | -1.01      | -1.23        | -11.44     | -4.21        |
| 243350_at   | ---        | ---                  | 0                                    | ---     | -1.13         | 1.18            | -1.06     | 1.15        | -1.13     | 1.35        | 2.95       | 1.75         | 2.30       | 1.31         | 3.60       | -1.32        |
| 243366_s_at | ---        | ---                  | 0                                    | ---     | -1.46         | -1.56           | -1.05     | 1.11        | 2.38      | 1.33        | -1.48      | 1.24         | -3.51      | -3.22        | -2.72      | -1.95        |
| 243367_at   | ---        | ---                  | 0                                    | ---     | -1.04         | 1.16            | -1.04     | 1.12        | -1.03     | 1.07        | -1.42      | 1.05         | -2.37      | -2.62        | -2.97      | -2.46        |
| 243378_at   | ---        | ---                  | 0                                    | ---     | -1.25         | -1.23           | -1.24     | 1.13        | 1.34      | -1.18       | 1.99       | 1.46         | 1.42       | 1.34         | 1.08       | 1.44         |
| 243381_at   | ---        | ---                  | 0                                    | ---     | 1.75          | -2.15           | 1.76      | -1.02       | 1.96      | 3.11        | 1.14       | -2.58        | 2.23       | 2.88         | 4.05       | 8.32         |
| 243383_at   | ---        | ---                  | 0                                    | ---     | 1.16          | 1.08            | 2.16      | 2.15        | 1.13      | -1.19       | 1.10       | -1.18        | -3.83      | -2.03        | -2.00      | -2.00        |
| 243388_at   | ---        | ---                  | 0                                    | ---     | -1.13         | -1.06           | -1.09     | 1.24        | -1.17     | 1.02        | 1.43       | 1.52         | 2.19       | 1.72         | 1.99       | 1.45         |
| 243397_at   | ---        | ---                  | 0                                    | ---     | -1.07         | -1.03           | 1.08      | 1.22        | -1.06     | 1.03        | -1.42      | -1.19        | -2.03      | -1.43        | -3.75      | -1.89        |

| ID          | Gene Title | Chromosomal Location | 1st Gene Ontology Biological Process | Pathway | A2497 30 mins | A2497P' 30 mins | A2497 2 h | A2497P' 2 h | A2497 4 h | A2497P' 4 h | A2497 24 h | A2497P' 24 h | A2497 48 h | A2497P' 48 h | A2497 72 h | A2497P' 72 h |
|-------------|------------|----------------------|--------------------------------------|---------|---------------|-----------------|-----------|-------------|-----------|-------------|------------|--------------|------------|--------------|------------|--------------|
| 243399_at   | ---        | ---                  | 0                                    | ---     | -1.15         | 1.53            | -4.98     | -2.53       | 1.49      | 1.38        | -3.39      | -1.03        | -1.38      | 1.31         | -2.35      | 1.64         |
| 243431_at   | ---        | ---                  | 0                                    | ---     | 1.17          | -1.01           | 1.01      | 1.11        | 1.03      | -1.00       | -1.81      | -1.29        | -1.74      | -2.15        | -1.98      | -4.03        |
| 243453_at   | ---        | ---                  | 0                                    | ---     | 1.21          | 1.45            | -1.01     | -1.51       | -1.09     | 1.14        | 1.81       | 1.09         | -1.40      | -1.51        | 1.14       | 1.04         |
| 243455_at   | ---        | ---                  | 0                                    | ---     | 1.30          | 1.16            | 1.01      | -1.46       | -1.11     | 1.03        | -1.03      | 1.02         | -1.85      | -1.57        | -2.95      | -2.05        |
| 243461_at   | ---        | ---                  | 0                                    | ---     | 1.04          | -1.48           | 1.01      | -1.07       | 1.13      | 1.16        | -1.57      | -1.15        | -1.88      | -2.23        | -1.69      | -2.24        |
| 243462_s_at | ---        | ---                  | 0                                    | ---     | 1.07          | 1.10            | 1.00      | -1.05       | 1.07      | 1.08        | 1.19       | 1.11         | -1.66      | -1.98        | -1.94      | -2.18        |
| 243466_at   | ---        | ---                  | 0                                    | ---     | 1.20          | 1.20            | -1.08     | -1.20       | -1.06     | -1.38       | -1.17      | -1.19        | -2.07      | -3.66        | -2.24      | -2.86        |
| 243480_at   | ---        | ---                  | 0                                    | ---     | 1.52          | -1.17           | 1.07      | -1.02       | -1.06     | -1.09       | -1.31      | -1.45        | -1.80      | -3.46        | 1.36       | 1.08         |
| 243490_at   | ---        | ---                  | 0                                    | ---     | -1.35         | -1.83           | 1.01      | -1.32       | 1.08      | -1.04       | -1.61      | -1.24        | -2.29      | -2.30        | -2.31      | -3.32        |
| 243498_at   | ---        | ---                  | 0                                    | ---     | 1.02          | 1.06            | 1.00      | -1.02       | 1.41      | 1.49        | 1.30       | -1.11        | -3.14      | -1.69        | -1.99      | -1.90        |
| 243509_at   | ---        | ---                  | 0                                    | ---     | 1.64          | 1.38            | -1.07     | -1.03       | -1.37     | -1.18       | 1.17       | -1.16        | -1.85      | -1.64        | -2.39      | -3.47        |
| 243511_at   | ---        | ---                  | 0                                    | ---     | 1.21          | 1.77            | 1.57      | 1.52        | -1.07     | 1.20        | 1.05       | -1.30        | -2.63      | -2.14        | -1.22      | 1.15         |
| 243512_x_at | ---        | ---                  | 0                                    | ---     | 1.22          | -1.10           | 1.03      | -1.14       | 1.37      | 1.33        | -1.11      | -1.06        | -3.70      | -2.94        | -2.66      | -2.91        |
| 243515_at   | ---        | ---                  | 0                                    | ---     | -1.56         | -1.22           | -1.33     | -2.90       | -1.27     | -1.73       | 1.05       | 1.15         | 1.47       | 1.59         | 2.16       | 1.59         |
| 243527_at   | ---        | ---                  | 0                                    | ---     | 1.12          | -1.19           | 1.01      | -1.03       | 1.03      | 1.25        | 1.10       | -1.02        | -2.27      | -1.65        | -1.74      | -1.50        |
| 243537_at   | ---        | ---                  | 0                                    | ---     | -1.07         | -1.17           | 1.49      | -1.35       | 1.08      | 1.21        | 1.52       | -1.07        | -1.03      | 1.77         | -5.08      | -3.81        |
| 243543_at   | ---        | ---                  | 0                                    | ---     | -1.07         | -1.29           | -1.01     | -1.06       | 1.04      | 1.14        | 1.10       | 1.06         | 2.05       | 1.98         | 2.50       | 3.24         |
| 243549_at   | ---        | ---                  | 0                                    | ---     | 1.04          | 2.00            | 1.48      | 1.93        | -1.05     | 1.86        | 1.27       | -1.18        | 3.28       | 5.73         | -1.24      | 1.77         |
| 243573_at   | ---        | ---                  | 0                                    | ---     | 1.23          | 1.22            | -2.44     | -1.70       | 3.04      | 2.79        | 2.27       | 1.25         | 2.75       | 2.20         | -3.40      | -2.04        |
| 243586_at   | ---        | ---                  | 0                                    | ---     | 1.59          | 1.35            | 1.18      | 1.00        | 1.15      | 1.13        | 1.55       | 1.08         | -3.29      | -2.84        | -1.91      | -2.09        |
| 243590_at   | ---        | ---                  | 0                                    | ---     | 1.46          | -1.08           | 1.05      | 1.00        | -1.17     | -1.29       | 1.36       | -1.06        | -2.99      | -1.93        | -2.87      | -1.99        |
| 243593_s_at | ---        | ---                  | 0                                    | ---     | -1.02         | -1.70           | -1.18     | -1.25       | 1.36      | 1.11        | 1.89       | 1.23         | -2.19      | -2.32        | -2.04      | -1.52        |
| 243631_at   | ---        | ---                  | 0                                    | ---     | 1.17          | 1.00            | 1.02      | 1.11        | 1.03      | 1.14        | 1.71       | 1.45         | 3.22       | 2.94         | 3.19       | 2.22         |
| 243635_at   | ---        | ---                  | 0                                    | ---     | -1.25         | -1.35           | 1.23      | 1.12        | -1.33     | 1.16        | -1.26      | -1.10        | -1.67      | -1.53        | -1.62      | 1.37         |
| 243636_s_at | ---        | ---                  | 0                                    | ---     | 13.07         | 8.48            | 1.19      | 1.17        | -1.24     | -1.26       | 1.05       | 1.12         | -2.49      | -1.42        | -5.02      | -10.00       |
| 243640_x_at | ---        | ---                  | 0                                    | ---     | 1.49          | -1.78           | -1.78     | -1.61       | 1.38      | -1.60       | -1.19      | 1.17         | -1.09      | -3.52        | 1.37       | 1.00         |
| 243646_at   | ---        | ---                  | 0                                    | ---     | 1.06          | -1.06           | 1.10      | -1.21       | 1.19      | 1.27        | 1.16       | 1.22         | -2.00      | -2.43        | -1.44      | -1.44        |
| 243652_at   | ---        | ---                  | 0                                    | ---     | 1.20          | 1.22            | 2.28      | 4.15        | -1.21     | -1.52       | 1.08       | -1.80        | 1.13       | 2.21         | -1.29      | 1.30         |
| 243662_at   | ---        | ---                  | 0                                    | ---     | 1.05          | 1.12            | -1.12     | -1.70       | 1.16      | 1.08        | -1.25      | 1.14         | -1.36      | -1.64        | -1.95      | -1.72        |
| 243670_at   | ---        | ---                  | 0                                    | ---     | -1.06         | 1.27            | 1.13      | 1.01        | 1.43      | 1.15        | -1.28      | -1.03        | -3.31      | -2.89        | -3.08      | -1.89        |
| 243671_at   | ---        | ---                  | 0                                    | ---     | 1.03          | -1.05           | 1.19      | 1.25        | -1.17     | 1.05        | -1.11      | 1.70         | -2.11      | -1.61        | -1.58      | -1.40        |
| 243682_at   | ---        | ---                  | 0                                    | ---     | 1.36          | 1.11            | 1.20      | 1.32        | 1.50      | 1.38        | 1.16       | -1.15        | -1.81      | -1.84        | -2.32      | -1.87        |
| 243694_at   | ---        | ---                  | 0                                    | ---     | 1.07          | 1.13            | 1.46      | 1.21        | 1.47      | 1.01        | -1.15      | -1.14        | -2.20      | -1.42        | -1.55      | -1.55        |
| 243718_at   | ---        | ---                  | 0                                    | ---     | 1.00          | 1.24            | 1.08      | 1.10        | 1.04      | 1.07        | -1.77      | -1.21        | -2.73      | -2.28        | -2.64      | -2.45        |
| 243723_at   | ---        | ---                  | 0                                    | ---     | -1.92         | -2.54           | -1.52     | -2.56       | 2.87      | 1.74        | -1.08      | 1.11         | 6.24       | 7.43         | 8.42       | 13.19        |
| 243730_at   | ---        | ---                  | 0                                    | ---     | 1.24          | 1.24            | -1.10     | -1.70       | 1.02      | 1.05        | 1.24       | 1.12         | 1.15       | 1.44         | 1.80       | 1.79         |
| 243731_at   | ---        | ---                  | 0                                    | ---     | 1.28          | -1.00           | 1.02      | -2.48       | 2.30      | 3.25        | 1.97       | -1.14        | 3.61       | 3.08         | -1.18      | 2.14         |
| 243736_at   | ---        | ---                  | 0                                    | ---     | 1.28          | -1.30           | 1.04      | 1.03        | 1.25      | 1.28        | -1.26      | -1.11        | -2.84      | -1.92        | -2.52      | -2.04        |
| 243740_at   | ---        | ---                  | 0                                    | ---     | 1.43          | 1.26            | 1.13      | 1.05        | 1.04      | 1.23        | 1.02       | 1.08         | -1.80      | -1.82        | -1.62      | -1.99        |
| 243745_at   | ---        | ---                  | 0                                    | ---     | 1.97          | 2.18            | -1.20     | -1.13       | 1.08      | 1.16        | -1.01      | 1.00         | -2.29      | -2.49        | -2.46      | -1.87        |
| 243754_at   | ---        | ---                  | 0                                    | ---     | -1.03         | -2.11           | -1.08     | 1.53        | 1.16      | -1.14       | 5.28       | 4.02         | 6.76       | 5.43         | 2.12       | 2.27         |
| 243778_at   | ---        | ---                  | 0                                    | ---     | -1.44         | -3.41           | 2.45      | -1.67       | -1.75     | -12.20      | 1.79       | 2.00         | 6.75       | 7.44         | -1.98      | 3.67         |
| 243782_at   | ---        | ---                  | 0                                    | ---     | 1.19          | 1.14            | 1.23      | 1.52        | -1.40     | 2.16        | 1.44       | 1.39         | -6.20      | -3.33        | -5.18      | -3.92        |
| 243817_at   | ---        | ---                  | 0                                    | ---     | -1.01         | -1.22           | 1.67      | 1.83        | 1.41      | 1.35        | -3.28      | -3.92        | -1.44      | 1.21         | -1.88      | -2.09        |
| 243831_at   | ---        | ---                  | 0                                    | ---     | -1.21         | 1.66            | 1.01      | 1.15        | -1.09     | -1.15       | 1.00       | -1.04        | 2.51       | 2.47         | 4.89       | 4.66         |
| 243847_at   | ---        | ---                  | 0                                    | ---     | 1.42          | 1.33            | 1.13      | 1.76        | -1.49     | 1.18        | 1.09       | 1.91         | 1.14       | 1.36         | 1.27       | 1.18         |
| 243848_at   | ---        | ---                  | 0                                    | ---     | 1.04          | 1.05            | 1.07      | -1.05       | 1.06      | 1.06        | 1.05       | 1.15         | -2.05      | -2.61        | -2.56      | -3.54        |
| 243860_at   | ---        | ---                  | 0                                    | ---     | 1.12          | -1.06           | 1.43      | -1.30       | -1.31     | -1.18       | -1.08      | -1.02        | 2.13       | 1.70         | -1.10      | 1.00         |
| 243865_x_at | ---        | ---                  | 0                                    | ---     | -1.52         | -2.92           | -2.27     | -2.26       | 1.62      | 2.78        | -1.27      | -1.34        | 2.15       | -1.98        | 1.11       | 2.32         |
| 243874_at   | ---        | ---                  | 0                                    | ---     | 1.08          | 1.02            | -1.03     | -1.04       | 1.03      | 1.05        | 1.12       | -1.12        | -1.69      | -2.29        | -2.36      | -1.32        |
| 243890_at   | ---        | ---                  | 0                                    | ---     | 1.08          | 1.25            | -1.12     | -2.39       | 1.01      | -1.18       | -2.00      | -1.23        | -1.33      | -1.75        | -2.00      | 1.86         |
| 243907_at   | ---        | ---                  | 0                                    | ---     | 1.38          | 1.13            | 1.10      | 1.05        | -1.09     | 1.00        | -1.12      | 1.06         | -1.83      | -1.71        | -1.54      | -1.79        |
| 243911_at   | ---        | ---                  | 0                                    | ---     | -1.93         | -1.83           | 1.38      | 1.33        | -1.26     | -1.05       | -1.28      | -1.02        | 1.01       | -1.71        | -3.00      | -1.60        |
| 243915_at   | ---        | ---                  | 0                                    | ---     | 1.43          | -1.26           | 1.89      | 1.09        | 1.08      | 1.20        | -1.14      | 1.08         | -1.43      | -2.50        | -3.20      | -2.69        |
| 243922_at   | ---        | ---                  | 0                                    | ---     | -1.55         | -2.64           | 7.16      | 16.11       | 1.22      | -7.31       | -1.55      | -2.73        | -2.42      | -1.21        | 3.13       | 2.50         |
| 243930_x_at | ---        | ---                  | 0                                    | ---     | 1.63          | 1.10            | -4.79     | -2.03       | -1.86     | 1.35        | -1.03      | -1.81        | 1.82       | 1.54         | 1.69       | 1.86         |
| 243931_at   | ---        | ---                  | 0                                    | ---     | -1.00         | 1.01            | 1.05      | 1.12        | 1.01      | 1.01        | -1.25      | -1.14        | -1.08      | 1.124        | -1.40      | -1.45        |
| 243936_x_at | ---        | ---                  | 0                                    | ---     | -2.41         | -1.82           | -2.34     | 1.63        | 1.65      | 1.13        | -2.09      | -1.46        | -1.03      | 1.75         | -1.01      | 5.59         |
| 243948_at   | ---        | ---                  | 0                                    | ---     | -1.08         | -1.01           | -1.05     | -1.22       | -1.01     | 1.19        | -1.30      | -1.24        | -3.96      | -2.92        | -2.85      | -2.89        |
| 243958_at   | ---        | ---                  | 0                                    | ---     | 2.05          | 1.60            | 1.21      | -1.34       | -1.00     | 1.03        | -1.45      | 1.04         | -2.24      | -1.63        | -3.24      | -2.28        |
| 243966_at   | ---        | ---                  | 0                                    | ---     | 2.00          | 1.49            | -1.32     | -1.15       | 1.03      | -1.23       | 1.21       | 1.02         | -1.69      | -1.10        | -1.90      | -2.25        |
| 243973_at   | ---        | ---                  | 0                                    | ---     | 1.23          | 1.61            | 1.02      | 1.11        | 1.14      | 1.10        | 1.01       | 1.08         | 1.09       | 1.53         | 1.50       | 1.57         |
| 243992_at   | ---        | ---                  | 0                                    | ---     | 1.43          | 1.06            | 1.12      | -1.20       | 1.19      | 1.23        | -1.83      | -1.33        | -2.72      | -1.83        | -1.69      | -1.72        |
| 244000_at   | ---        | ---                  | 0                                    | ---     | -1.02         | 1.40            | -1.23     | -1.35       | 1.10      | 1.16        | 1.22       | 1.18         | -2.25      | -1.82        | -2.00      | -1.26        |
| 244005_at   | ---        | ---                  | 0                                    | ---     | 1.30          | 1.01            | 1.33      | 1.23        | 1.02      | 1.01        | 1.13       | 1.02         | -2.16      | -1.85        | -1.48      | -1.58        |
| 244013_at   | ---        | ---                  | 0                                    | ---     | 1.11          | 1.04            | -1.13     | -1.08       | -1.01     | 1.05        | -1.06      | -1.14        | 1.22       | -1.02        | -1.89      | -2.73        |

| ID          | Gene Title | Chromosomal Location | 1st Gene Ontology Biological Process | Pathway | A2497 30 mins | A2497P' 30 mins | A2497 2 h | A2497P' 2 h | A2497 4 h | A2497P' 4 h | A2497 24 h | A2497P' 24 h | A2497 48 h | A2497P' 48 h | A2497 72 h | A2497P' 72 h |
|-------------|------------|----------------------|--------------------------------------|---------|---------------|-----------------|-----------|-------------|-----------|-------------|------------|--------------|------------|--------------|------------|--------------|
| 244015_at   | ---        | ---                  | 0                                    | ---     | -1.26         | 1.03            | -1.37     | -1.31       | 1.48      | 1.35        | -1.15      | -1.32        | -2.74      | -2.49        | -2.03      | -1.90        |
| 244019_at   | ---        | ---                  | 0                                    | ---     | 1.24          | -1.03           | -1.19     | 1.07        | 1.20      | 1.37        | 1.43       | -1.14        | -5.13      | -2.98        | -1.13      | 1.39         |
| 244027_at   | ---        | ---                  | 0                                    | ---     | 1.25          | 1.06            | 1.05      | 1.08        | -1.42     | -1.06       | -1.72      | -1.29        | -5.65      | -2.75        | -2.27      | -1.57        |
| 244045_at   | ---        | ---                  | 0                                    | ---     | -1.05         | 2.00            | -1.29     | 1.09        | -2.85     | -2.71       | 1.17       | 1.54         | -2.04      | 1.04         | 1.13       | 1.13         |
| 244053_at   | ---        | ---                  | 0                                    | ---     | 1.69          | 1.18            | 1.02      | 1.16        | 1.01      | 1.01        | -1.05      | 1.03         | -1.36      | -2.19        | -2.46      | -2.66        |
| 244075_at   | ---        | ---                  | 0                                    | ---     | 2.35          | -1.04           | 1.19      | 1.46        | 1.46      | 1.41        | 1.39       | 1.10         | 1.16       | 1.05         | 1.61       | 1.55         |
| 244080_at   | ---        | ---                  | 0                                    | ---     | -1.88         | -1.08           | -1.14     | 1.61        | -1.36     | -3.01       | 1.03       | -2.45        | -1.58      | -2.38        | -1.57      | -1.11        |
| 244091_at   | ---        | ---                  | 0                                    | ---     | -1.09         | -1.03           | 1.10      | -1.22       | -1.13     | -1.17       | 1.24       | 1.18         | 1.64       | 1.89         | -1.32      | -1.08        |
| 244094_at   | ---        | ---                  | 0                                    | ---     | 1.46          | 1.72            | -1.58     | 1.34        | -1.66     | -1.57       | 2.44       | 3.23         | 4.86       | 10.56        | 1.32       | 1.88         |
| 244096_at   | ---        | ---                  | 0                                    | ---     | 1.58          | 1.11            | 1.58      | 1.64        | 1.74      | 1.23        | 19.01      | 8.95         | 1.35       | -1.44        | 2.25       | 1.15         |
| 244100_at   | ---        | ---                  | 0                                    | ---     | 1.03          | -1.08           | 1.07      | -1.06       | 1.03      | 1.31        | -1.35      | 1.03         | 1.05       | 1.14         | -2.09      | -1.85        |
| 244107_at   | ---        | ---                  | 0                                    | ---     | -2.14         | -1.90           | -1.11     | 1.05        | -1.98     | 1.42        | 1.33       | -1.12        | -1.43      | -2.41        | -2.57      | -1.50        |
| 244114_x_at | ---        | ---                  | 0                                    | ---     | 1.43          | 1.30            | -1.14     | -1.05       | 1.08      | 1.35        | 1.16       | -1.02        | -1.29      | -1.12        | -1.57      | -1.76        |
| 244125_at   | ---        | ---                  | 0                                    | ---     | 1.02          | -1.15           | 1.39      | 1.50        | -1.23     | 1.10        | -1.73      | -1.03        | -5.15      | -4.92        | -6.06      | -4.72        |
| 244145_at   | ---        | ---                  | 0                                    | ---     | 1.04          | 1.28            | -1.00     | -1.14       | -1.31     | -1.24       | -1.26      | 1.05         | -2.34      | -1.39        | -3.04      | -1.77        |
| 244156_at   | ---        | ---                  | 0                                    | ---     | 1.12          | -1.21           | 1.09      | 1.19        | -1.20     | 1.25        | 1.35       | -3.59        | -2.35      | -10.13       | -3.30      | -3.30        |
| 244160_at   | ---        | ---                  | 0                                    | ---     | 1.29          | 1.22            | -1.21     | -1.07       | -1.25     | -1.17       | -1.08      | 1.09         | 2.15       | 1.65         | 1.45       | 1.35         |
| 244166_at   | ---        | ---                  | 0                                    | ---     | -1.06         | -1.24           | -1.16     | -1.00       | -1.34     | -1.28       | 1.19       | 1.21         | 1.06       | 1.12         | -1.65      | -1.41        |
| 244197_x_at | ---        | ---                  | 0                                    | ---     | -1.00         | 1.17            | 1.23      | 1.15        | 1.04      | 1.09        | 1.11       | 1.06         | -1.44      | -1.52        | -1.22      | 1.04         |
| 244204_at   | ---        | ---                  | 0                                    | ---     | 1.36          | 1.12            | -1.04     | -1.23       | 1.12      | 1.25        | -1.35      | -1.11        | -2.07      | -1.42        | -1.85      | -2.02        |
| 244208_at   | ---        | ---                  | 0                                    | ---     | 1.45          | 1.22            | 1.06      | 1.34        | 1.27      | 1.06        | 1.09       | -1.09        | -1.83      | -1.82        | -1.65      | -1.73        |
| 244218_at   | ---        | ---                  | 0                                    | ---     | -2.23         | 1.35            | 1.19      | 1.45        | -1.30     | 1.43        | -2.36      | 1.17         | 2.63       | 1.58         | 3.49       | 1.69         |
| 244219_at   | ---        | ---                  | 0                                    | ---     | 1.80          | 1.40            | 1.32      | -1.37       | -1.65     | -1.62       | -3.58      | -1.54        | 2.93       | 2.47         | 1.33       | -1.05        |
| 244230_at   | ---        | ---                  | 0                                    | ---     | 1.46          | 2.02            | 2.03      | 2.00        | 1.20      | 1.40        | 4.16       | 3.19         | 1.34       | 2.49         | 5.67       | 2.57         |
| 244239_at   | ---        | ---                  | 0                                    | ---     | 1.49          | 1.05            | 1.16      | 1.08        | 1.13      | 1.10        | 1.03       | 1.02         | -1.63      | -1.42        | -1.63      | -1.54        |
| 244249_at   | ---        | ---                  | 0                                    | ---     | 2.82          | 1.86            | 1.54      | 1.63        | 1.79      | 2.00        | 1.23       | 1.09         | -3.38      | -1.95        | -2.34      | -4.97        |
| 244271_at   | ---        | ---                  | 0                                    | ---     | -1.62         | 1.01            | -1.10     | -1.01       | -1.18     | 1.36        | -1.54      | -1.39        | -2.08      | -2.14        | -3.21      | -1.89        |
| 244277_at   | ---        | ---                  | 0                                    | ---     | 1.27          | 1.07            | -2.44     | -1.87       | -1.44     | -1.27       | -1.12      | 1.15         | 1.12       | -1.21        | 1.41       | 1.75         |
| 244295_at   | ---        | ---                  | 0                                    | ---     | -1.69         | -1.33           | 1.03      | -2.20       | 5.90      | 4.24        | 1.13       | -5.51        | 10.64      | 2.50         | 1.19       | 1.54         |
| 244298_at   | ---        | ---                  | 0                                    | ---     | 1.27          | 1.04            | 1.26      | 1.31        | -1.19     | 1.39        | 1.09       | 1.15         | -2.16      | -1.70        | -1.82      | -1.73        |
| 244303_at   | ---        | ---                  | 0                                    | ---     | -1.50         | 1.51            | -1.20     | 1.21        | 1.62      | 2.21        | -2.93      | -1.30        | -2.83      | -2.68        | -1.09      | -3.72        |
| 244306_at   | ---        | ---                  | 0                                    | ---     | -2.87         | -1.54           | 2.41      | 2.73        | -1.33     | -1.27       | 1.16       | -1.01        | 2.78       | 2.46         | -1.14      | 1.13         |
| 244312_at   | ---        | ---                  | 0                                    | ---     | -1.05         | -1.21           | -1.63     | -1.75       | 1.17      | 1.02        | 1.34       | -2.42        | -2.42      | -2.21        | -1.41      | -1.46        |
| 244314_at   | ---        | ---                  | 0                                    | ---     | 1.48          | -2.38           | -1.59     | -1.05       | 2.76      | 1.42        | -1.37      | -1.40        | 22.47      | 14.08        | 2.55       | 1.90         |
| 244328_x_at | ---        | ---                  | 0                                    | ---     | 2.53          | 1.24            | -1.36     | -2.85       | -1.05     | -1.79       | 1.03       | -1.24        | 1.29       | 1.09         | 1.36       | 1.23         |
| 244332_at   | ---        | ---                  | 0                                    | ---     | -1.39         | -1.22           | -1.29     | 1.21        | 1.14      | 1.17        | -1.04      | 1.10         | -2.02      | -1.99        | -2.34      | -1.73        |
| 244333_at   | ---        | ---                  | 0                                    | ---     | 3.82          | -1.10           | -5.64     | -1.29       | -1.86     | -2.77       | 2.37       | 1.77         | -1.01      | -3.82        | 5.48       | 9.02         |
| 244340_x_at | ---        | ---                  | 0                                    | ---     | 1.39          | 1.33            | 1.02      | 1.29        | 1.18      | 1.24        | -1.25      | -1.06        | -1.83      | -2.11        | -2.71      | -2.71        |
| 244348_at   | ---        | ---                  | 0                                    | ---     | 1.01          | 1.45            | -1.30     | -1.01       | 1.35      | 1.00        | 1.27       | 1.06         | -2.77      | -2.49        | -1.32      | -1.27        |
| 244357_at   | ---        | ---                  | 0                                    | ---     | 1.44          | 1.06            | 1.04      | 1.53        | -1.31     | 1.56        | -1.23      | 1.38         | -2.67      | -1.29        | -1.42      | 1.50         |
| 244359_s_at | ---        | ---                  | 0                                    | ---     | 1.24          | 1.22            | -1.17     | -1.13       | -1.11     | 1.11        | -1.07      | -1.02        | -1.18      | -1.00        | -1.81      | -1.99        |
| 244362_at   | ---        | ---                  | 0                                    | ---     | 1.12          | 1.05            | 1.26      | 1.59        | 1.20      | 1.44        | -1.02      | -1.06        | -1.16      | 1.05         | -1.50      | -1.22        |
| 244368_x_at | ---        | ---                  | 0                                    | ---     | -1.06         | -1.05           | 1.02      | 1.03        | -1.22     | -1.15       | -1.59      | -1.61        | -2.18      | -3.02        | -2.85      | -2.17        |
| 244373_at   | ---        | ---                  | 0                                    | ---     | -1.15         | 1.00            | -1.09     | -1.05       | 1.37      | 1.47        | -1.06      | -1.25        | -1.36      | -1.52        | -2.78      | -1.75        |
| 244387_at   | ---        | ---                  | 0                                    | ---     | 1.14          | 1.07            | -1.09     | -1.02       | 1.06      | 1.66        | 1.36       | 1.10         | -2.13      | -1.97        | -4.26      | -4.31        |
| 244390_at   | ---        | ---                  | 0                                    | ---     | -1.76         | -1.48           | 1.27      | 1.11        | 1.06      | 1.14        | 3.44       | 7.86         | 1.16       | 1.54         | 8.53       | 2.21         |
| 244397_at   | ---        | ---                  | 0                                    | ---     | -1.22         | -1.21           | -1.16     | -1.24       | 1.12      | 1.06        | 1.23       | 1.22         | -2.42      | -1.70        | -1.39      | -1.53        |
| 244423_at   | ---        | ---                  | 0                                    | ---     | 1.82          | 1.47            | 1.33      | 1.08        | 1.01      | 1.11        | 1.16       | 1.05         | -2.63      | -2.98        | -2.07      | -2.79        |
| 244425_at   | ---        | ---                  | 0                                    | ---     | 2.92          | 2.06            | -1.07     | -1.15       | 1.05      | 1.06        | -1.04      | -1.15        | -2.37      | -2.16        | -1.60      | -1.26        |
| 244426_at   | ---        | ---                  | 0                                    | ---     | -1.31         | -1.40           | -1.16     | -1.52       | 1.16      | 1.45        | -1.25      | -1.28        | -1.27      | -1.45        | -1.35      | -1.39        |
| 244433_at   | ---        | ---                  | 0                                    | ---     | 1.71          | 1.43            | -1.04     | 1.24        | 1.36      | 1.54        | -1.15      | 1.06         | -2.17      | -1.69        | -2.25      | -2.52        |
| 244441_at   | ---        | ---                  | 0                                    | ---     | 1.22          | 1.19            | 1.02      | -1.00       | 1.01      | 1.01        | -1.19      | -1.21        | -1.25      | 1.32         | -2.54      | -3.12        |
| 244464_at   | ---        | ---                  | 0                                    | ---     | 1.34          | -1.36           | -1.03     | -1.13       | 1.08      | -1.04       | 1.10       | -1.14        | -1.39      | -2.15        | -1.45      | -2.42        |
| 244465_at   | ---        | ---                  | 0                                    | ---     | 3.95          | 1.41            | 1.76      | 1.19        | -3.14     | -1.99       | 9.70       | 3.72         | 6.48       | 3.85         | 4.79       | 3.21         |
| 244474_at   | ---        | ---                  | 0                                    | ---     | 1.38          | 1.37            | -1.12     | 1.36        | 1.24      | 1.40        | -1.18      | -1.01        | -2.39      | -2.03        | -1.83      | -1.66        |
| 244475_at   | ---        | ---                  | 0                                    | ---     | 1.48          | 1.34            | 1.50      | 2.04        | -3.83     | -1.61       | 1.09       | 1.23         | -2.48      | -1.67        | -1.04      | -3.17        |
| 244484_at   | ---        | ---                  | 0                                    | ---     | -2.16         | -1.09           | -1.09     | -1.63       | -1.96     | -2.46       | -2.18      | -1.34        | -1.20      | 1.22         | 4.65       | 3.74         |
| 244491_at   | ---        | ---                  | 0                                    | ---     | -3.23         | -2.74           | 2.21      | 1.24        | 1.15      | -2.33       | 1.17       | 1.61         | 2.35       | 1.45         | 2.18       | 2.77         |
| 244514_at   | ---        | ---                  | 0                                    | ---     | 1.00          | -1.02           | 1.07      | 1.04        | -1.08     | -1.05       | 1.09       | 1.40         | 1.31       | 1.03         | 1.03       | 1.07         |
| 244524_at   | ---        | ---                  | 0                                    | ---     | 3.00          | 2.50            | -1.05     | 1.45        | 2.78      | 2.07        | 1.27       | 1.39         | 1.28       | -1.07        | 2.80       | 2.34         |
| 244528_at   | ---        | ---                  | 0                                    | ---     | 1.91          | 1.24            | 1.23      | -2.17       | 2.40      | 2.04        | -1.77      | -1.04        | 1.08       | 1.00         | -1.12      | -2.58        |
| 244532_x_at | ---        | ---                  | 0                                    | ---     | 1.59          | 1.57            | 1.01      | -1.12       | -1.20     | -1.06       | 1.07       | -1.07        | -1.32      | -1.12        | -1.43      | -1.89        |
| 244534_at   | ---        | ---                  | 0                                    | ---     | 1.27          | 1.22            | -1.02     | 1.19        | 1.19      | 1.20        | -1.06      | 1.24         | -1.85      | -1.72        | -2.34      | -1.66        |
| 244535_at   | ---        | ---                  | 0                                    | ---     | 1.34          | 1.43            | 1.59      | 1.61        | 1.65      | 1.81        | -1.10      | -1.26        | -1.59      | -1.46        | -2.32      | -7.92        |
| 244559_at   | ---        | ---                  | 0                                    | ---     | 1.23          | 1.33            | -1.00     | -1.11       | -1.01     | 1.18        | -1.10      | 1.10         | -1.58      | -1.55        | -2.02      | -2.14        |
| 244579_at   | ---        | ---                  | 0                                    | ---     | 1.14          | -1.10           | 1.03      | -1.29       | 1.13      | 1.56        | -1.24      | -1.24        | -2.19      | -1.85        | -2.88      | -2.48        |

| ID         | Gene Title                                         | Chromosomal Location | 1st Gene Ontology Biological Process                                 | Pathway                                | A2497 30 mins | A2497P' 30 mins | A2497 2 h | A2497P' 2 h | A2497 4 h | A2497P' 4 h | A2497 24 h | A2497P' 24 h | A2497 48 h | A2497P' 48 h | A2497 72 h | A2497P' 72 h |
|------------|----------------------------------------------------|----------------------|----------------------------------------------------------------------|----------------------------------------|---------------|-----------------|-----------|-------------|-----------|-------------|------------|--------------|------------|--------------|------------|--------------|
| 244596_at  | ---                                                | ---                  | 0                                                                    | ---                                    | -1.19         | -1.55           | 1.58      | -1.14       | -1.10     | -1.14       | 1.14       | -1.36        | 1.25       | 1.30         | 1.68       | 2.08         |
| 244597_at  | ---                                                | ---                  | 0                                                                    | ---                                    | 1.26          | 1.38            | -1.07     | 1.05        | -1.15     | 1.30        | -1.11      | -1.14        | -1.78      | -1.90        | -1.99      | -1.18        |
| 244636_at  | ---                                                | ---                  | 0                                                                    | ---                                    | 2.58          | 1.80            | 1.88      | 2.19        | -1.13     | -1.24       | -1.41      | -1.43        | -2.40      | -1.35        | -3.05      | -2.68        |
| 244639_at  | ---                                                | ---                  | 0                                                                    | ---                                    | -1.39         | 1.35            | 1.29      | -1.63       | -1.25     | -1.23       | 1.38       | 2.79         | 4.53       | 4.29         | -2.20      | 1.04         |
| 244647_at  | ---                                                | ---                  | 0                                                                    | ---                                    | -1.09         | 1.08            | 1.00      | -1.01       | -1.02     | -1.11       | -1.08      | 1.02         | -1.68      | -1.49        | -1.40      | -1.35        |
| 244663_at  | ---                                                | ---                  | 0                                                                    | ---                                    | 1.30          | 1.13            | 1.01      | 1.02        | -1.46     | 1.05        | -1.62      | -1.21        | -2.12      | -2.74        | -2.52      | -2.61        |
| 244684_at  | ---                                                | ---                  | 0                                                                    | ---                                    | -1.06         | -1.25           | 1.44      | 1.54        | -1.07     | 1.73        | 1.17       | 1.19         | -1.92      | -1.63        | -1.34      | 1.18         |
| 244690_at  | ---                                                | ---                  | 0                                                                    | ---                                    | 1.91          | 1.52            | 1.24      | -1.47       | -2.07     | -1.25       | -1.53      | 1.38         | -4.47      | -5.89        | -1.22      | -2.74        |
| 244693_at  | ---                                                | ---                  | 0                                                                    | ---                                    | 1.18          | 1.24            | 1.40      | 1.39        | 1.19      | 1.26        | -1.45      | -1.24        | -1.26      | -1.62        | -2.93      | -3.31        |
| 244711_at  | ---                                                | ---                  | 0                                                                    | ---                                    | -2.22         | -1.04           | -1.13     | 1.07        | 1.14      | 1.09        | 1.53       | 1.42         | -5.98      | -2.18        | -6.07      | -4.20        |
| 244726_at  | ---                                                | ---                  | 0                                                                    | ---                                    | 1.59          | 1.35            | 1.12      | -1.01       | 1.61      | 1.05        | -1.85      | -1.96        | -3.18      | -1.77        | -3.83      | -4.24        |
| 244732_at  | ---                                                | ---                  | 0                                                                    | ---                                    | -1.04         | 1.05            | -1.12     | -1.10       | -1.24     | -1.43       | 1.08       | 1.08         | -1.75      | -1.63        | -2.19      | -1.99        |
| 244749_at  | ---                                                | ---                  | 0                                                                    | ---                                    | 1.15          | -1.14           | 1.36      | -1.01       | -1.45     | 1.02        | 1.35       | 1.06         | -2.15      | -2.17        | -1.58      | -1.81        |
| 244754_at  | ---                                                | ---                  | 0                                                                    | ---                                    | -1.18         | -1.39           | 1.35      | 1.43        | 1.15      | -1.02       | 1.34       | 1.31         | -1.47      | -3.87        | -1.68      | -1.53        |
| 244757_at  | ---                                                | ---                  | 0                                                                    | ---                                    | -1.41         | -1.01           | 1.50      | 1.53        | 1.48      | 1.11        | 1.22       | 1.08         | -2.25      | -2.50        | -1.51      | -1.12        |
| 244773_at  | ---                                                | ---                  | 0                                                                    | ---                                    | -3.46         | 1.75            | -1.43     | -1.85       | -1.45     | 1.03        | -1.17      | -1.05        | 3.62       | 2.83         | 1.63       | 2.14         |
| 244813_at  | ---                                                | ---                  | 0                                                                    | ---                                    | -7.00         | -1.19           | -1.07     | -1.38       | -1.66     | -3.95       | -1.44      | -1.20        | 1.95       | 2.72         | -2.51      | -2.56        |
| 244821_at  | ---                                                | ---                  | 0                                                                    | ---                                    | 1.13          | 2.09            | -1.42     | -1.45       | -1.73     | -1.73       | -1.53      | -1.48        | 1.20       | 1.67         | 1.19       | -2.92        |
| 244826_at  | ---                                                | ---                  | 0                                                                    | ---                                    | 1.46          | 1.58            | 1.25      | -1.17       | 1.65      | 1.51        | -1.02      | 1.08         | -2.67      | -2.80        | -1.76      | -1.66        |
| 244838_at  | ---                                                | ---                  | 0                                                                    | ---                                    | -1.04         | -1.27           | 1.61      | 2.51        | 1.08      | 1.16        | 2.28       | 1.37         | 1.46       | -1.11        | -2.02      | -1.24        |
| 244845_at  | ---                                                | ---                  | 0                                                                    | ---                                    | -1.04         | -1.10           | -1.28     | 1.03        | 1.27      | 1.40        | -1.07      | 1.26         | -3.84      | -3.29        | -1.87      | -2.49        |
| 244855_at  | ---                                                | ---                  | 0                                                                    | ---                                    | 1.27          | 1.11            | 1.31      | 1.37        | 1.48      | 1.02        | -1.09      | 1.06         | 3.06       | 2.92         | 1.53       | 1.25         |
| 244856_at  | ---                                                | ---                  | 0                                                                    | ---                                    | 1.08          | 1.17            | 1.01      | -1.07       | 1.36      | 1.14        | -1.04      | -1.14        | -2.74      | -3.31        | -1.89      | -1.64        |
| 244878_at  | ---                                                | ---                  | 0                                                                    | ---                                    | 3.24          | 1.74            | 2.94      | 1.81        | -1.44     | 1.00        | -1.71      | -1.12        | 7.30       | 7.16         | -1.03      | 1.00         |
| 31799_at   | ---                                                | ---                  | 0                                                                    | ---                                    | -1.08         | -1.01           | 1.12      | 1.16        | 1.06      | 1.17        | -1.17      | -1.04        | 1.12       | 1.22         | 1.15       | 1.39         |
| 91682_at   | ---                                                | ---                  | 0                                                                    | ---                                    | 1.09          | 1.19            | -1.09     | -1.17       | 1.06      | 1.24        | -1.31      | 1.26         | 2.09       | 1.96         | 2.16       | 1.88         |
| ZACN       | zinc activated ligand-gated                        | chr17q25.3           | transport                                                            | ---                                    | -1.04         | -1.17           | -1.11     | 1.20        | -1.26     | -1.20       | -1.27      | -1.25        | -1.24      | -1.24        | -1.63      | -1.34        |
| ZADH2      | zinc binding alcohol dehydrogenase                 | chr18q22.3           | oxidation-reduction process                                          | ---                                    | 1.18          | 1.29            | 1.16      | 1.14        | -1.04     | 1.06        | -1.01      | 1.12         | -1.18      | -1.23        | -1.39      | -1.37        |
| ZADH2      | zinc binding alcohol dehydrogenase                 | chr18q22.3           | 0                                                                    | ---                                    | -1.16         | -1.03           | 1.08      | -1.06       | 1.07      | -1.01       | 1.25       | 1.02         | 1.69       | 1.96         | 1.46       | 1.51         |
| ZADH2      | zinc binding alcohol dehydrogenase                 | chr18q22.3           | oxidation-reduction process                                          | ---                                    | 1.10          | 1.07            | 1.01      | 1.02        | 1.02      | 1.06        | 1.10       | 1.15         | 1.01       | 1.27         | 1.02       | 1.06         |
| ZAK        | sterile alpha motif and leucine-rich repeat domain | chr2q24.2            | cell cycle checkpoint                                                | ---                                    | 1.01          | -1.01           | -1.03     | 1.12        | 1.02      | 1.10        | -1.00      | -1.09        | 1.60       | 1.60         | 1.35       | 1.54         |
| ZAK        | sterile alpha motif and leucine-rich repeat domain | chr2q24.2            | cell cycle checkpoint                                                | ---                                    | -1.09         | -1.03           | 1.06      | -1.02       | -1.05     | 1.06        | 1.06       | -1.01        | 1.34       | 1.76         | 1.51       | 1.67         |
| ZAK        | sterile alpha motif and leucine-rich repeat domain | chr2q24.2            | cell cycle checkpoint                                                | ---                                    | 1.31          | 1.15            | -1.01     | -1.09       | -1.10     | -1.00       | -1.15      | -1.14        | 1.46       | 1.39         | 1.33       | 1.14         |
| ZAK        | sterile alpha motif and leucine-rich repeat domain | chr2q24.2            | cell cycle checkpoint                                                | ---                                    | -1.07         | -1.14           | -1.03     | -1.01       | 1.16      | -1.09       | -1.01      | 1.04         | 1.21       | 1.22         | 1.30       | 1.42         |
| ZAK        | sterile alpha motif and leucine-rich repeat domain | chr2q24.2            | cell cycle checkpoint                                                | ---                                    | 1.10          | -1.03           | 1.06      | -1.09       | -1.06     | 1.03        | -1.16      | -1.20        | 1.19       | 1.14         | 1.54       | 1.43         |
| ZAK        | sterile alpha motif and leucine-rich repeat domain | chr2q24.2            | cell cycle checkpoint                                                | ---                                    | -1.12         | -1.50           | 1.39      | 1.16        | 1.38      | 1.37        | 1.25       | -1.03        | 3.19       | 2.77         | 1.82       | 2.02         |
| ZAK        | sterile alpha motif and leucine-rich repeat domain | chr2q24.2            | cell cycle checkpoint                                                | ---                                    | 1.05          | 1.06            | 1.17      | 1.02        | 1.09      | 1.23        | 1.06       | -1.03        | 1.38       | 1.55         | 1.25       | 1.07         |
| ZAP70      | zeta-chain (TCR) associated protein kinase         | chr2q12              | adaptive immune response                                             | Inflammatory_Response_Pathway // GenMA | -3.06         | -1.92           | 1.25      | -1.06       | 1.45      | 1.18        | 1.31       | 3.60         | 5.10       | 2.09         | -3.44      | -3.80        |
| ZBED1      | zinc finger, BED-type containing                   | chrXp22.33:Yp11.1    | 0                                                                    | ---                                    | -1.08         | -1.04           | 1.07      | -1.29       | -1.09     | -1.17       | -1.08      | 1.04         | -1.27      | -1.30        | -1.08      | -1.37        |
| ZBED2      | zinc finger, BED-type containing                   | chr3q13.2            | 0                                                                    | ---                                    | -1.13         | 1.10            | 1.18      | 1.46        | -1.10     | -1.00       | -1.26      | 1.05         | -2.08      | -2.67        | -5.21      | -4.95        |
| ZBED3      | zinc finger, BED-type containing                   | chr5q13.3            | negative regulation of protein phosphorylation                       | ---                                    | 1.10          | -1.08           | 1.37      | 1.73        | -1.15     | -1.16       | -1.00      | -1.03        | -1.02      | -1.14        | -1.74      | -1.87        |
| ZBED3      | zinc finger, BED-type containing                   | chr5q13.3            | negative regulation of protein phosphorylation                       | ---                                    | 1.11          | 1.03            | -1.08     | 1.03        | -1.05     | 1.15        | -1.43      | -1.18        | -2.22      | -1.78        | -2.07      | -1.94        |
| ZBED5      | zinc finger, BED-type containing                   | chr11p15.3           | 0                                                                    | ---                                    | -1.04         | -1.07           | 1.03      | 1.19        | 1.08      | -1.04       | -1.01      | 1.02         | -1.50      | -1.53        | -1.44      | -1.33        |
| ZBED5-AS1  | ZBED5 antisense RNA 1                              | chr11p15.3           | 0                                                                    | ---                                    | 1.23          | 1.24            | 1.20      | -1.15       | 1.04      | -1.11       | -1.39      | -1.01        | -3.30      | -2.51        | -3.89      | -3.25        |
| ZBED6CL    | ZBED6 C-terminal like                              | chr7q36.1            | 0                                                                    | ---                                    | -1.04         | -1.06           | 1.13      | 1.01        | 1.02      | 1.06        | -1.17      | -1.03        | -1.82      | -1.55        | -1.12      | -1.19        |
| ZBTB1      | zinc finger and BTB domain                         | chr14q23.3           | transcription, DNA-dependent                                         | ---                                    | 1.10          | -1.14           | 1.08      | -1.45       | -1.17     | 1.36        | -1.44      | -1.07        | -1.79      | -1.81        | -1.43      | -1.84        |
| ZBTB1      | zinc finger and BTB domain                         | chr14q23.3           | transcription, DNA-dependent                                         | ---                                    | 1.93          | 1.61            | 1.31      | 1.01        | 1.10      | 1.32        | -1.07      | -1.05        | -1.97      | -2.60        | -2.93      | -4.56        |
| ZBTB10     | zinc finger and BTB domain                         | chr8q13-q21.1        | negative regulation of transcription from RNA polymerase II promoter | ---                                    | -1.20         | 1.39            | -1.05     | 1.28        | 1.53      | -1.42       | -1.06      | 1.06         | -2.35      | -1.11        | 3.33       | 2.57         |
| ZBTB10     | zinc finger and BTB domain                         | chr8q13-q21.1        | negative regulation of transcription from RNA polymerase II promoter | ---                                    | -1.75         | -1.68           | -2.80     | 1.07        | -4.97     | -3.92       | -1.41      | 1.04         | -1.18      | 1.32         | 4.46       | 4.79         |
| ZBTB10     | zinc finger and BTB domain                         | chr8q13-q21.1        | negative regulation of transcription from RNA polymerase II promoter | ---                                    | -2.56         | -1.11           | -1.25     | -1.32       | -1.44     | -1.07       | -1.40      | -2.60        | 2.38       | 1.19         | 5.01       | 5.47         |
| ZBTB11     | zinc finger and BTB domain                         | chr3q12.3            | transcription, DNA-dependent                                         | ---                                    | 1.04          | 1.06            | -1.02     | -1.07       | -1.14     | -1.03       | -1.03      | -1.04        | 1.04       | 1.27         | 1.32       | 1.20         |
| ZBTB11     | zinc finger and BTB domain                         | chr3q12.3            | transcription, DNA-dependent                                         | ---                                    | 1.43          | 1.29            | 1.21      | -1.14       | 1.56      | 1.36        | -1.01      | -1.23        | 1.88       | 1.18         | 1.46       | 1.23         |
| ZBTB11-AS1 | ZBTB11 antisense RNA 1                             | chr3q12.3            | 0                                                                    | ---                                    | 1.47          | 1.56            | 1.30      | 1.10        | -1.60     | -1.08       | -1.34      | -1.06        | -4.97      | -5.20        | -5.50      | -3.31        |
| ZBTB11-AS1 | ZBTB11 antisense RNA 1                             | chr3q12.3            | 0                                                                    | ---                                    | 1.04          | 1.12            | -1.02     | -1.04       | -1.11     | -1.17       | -1.07      | 1.03         | -1.55      | -1.39        | -2.55      | -1.73        |
| ZBTB17     | zinc finger and BTB domain                         | chr1p36.13           | gastrulation with mouth forming second pharyngeal pouch              | ---                                    | 1.23          | -1.10           | 1.21      | 1.20        | 1.34      | 1.17        | 1.65       | 1.37         | 1.79       | 1.60         | 1.88       | 2.14         |
| ZBTB18     | zinc finger and BTB domain                         | chr1q44-qter         | negative regulation of transcription from RNA polymerase II promoter | ---                                    | 1.30          | 1.16            | 1.27      | -1.47       | -1.85     | 1.03        | 2.29       | 3.19         | 3.21       | 2.08         | -1.04      | -1.46        |
| ZBTB20     | zinc finger and BTB domain                         | chr3q13.2            | negative regulation of transcription from RNA polymerase II promoter | ---                                    | -1.52         | -1.22           | 1.19      | -1.05       | -1.12     | 1.44        | -1.52      | -1.03        | -1.61      | 1.02         | -1.51      | -2.14        |
| ZBTB20     | zinc finger and BTB domain                         | chr3q13.2            | negative regulation of transcription from RNA polymerase II promoter | ---                                    | 2.40          | -1.75           | 1.82      | 2.22        | -1.87     | -1.36       | -3.06      | -1.59        | -1.45      | -3.76        | 2.09       | 1.69         |
| ZBTB20     | zinc finger and BTB domain                         | chr3q13.2            | negative regulation of transcription from RNA polymerase II promoter | ---                                    | 1.28          | 1.33            | 1.24      | 1.09        | -1.02     | -1.11       | 1.05       | -1.14        | -2.99      | -3.20        | -3.33      | -3.36        |
| ZBTB21     | zinc finger and BTB domain                         | chr21q22.3           | transcription, DNA-dependent                                         | ---                                    | 1.18          | 1.15            | 1.09      | -1.01       | 1.09      | 1.13        | 1.01       | -1.02        | 1.61       | 1.78         | 2.64       | 2.21         |
| ZBTB21     | zinc finger and BTB domain                         | chr21q22.3           | transcription, DNA-dependent                                         | ---                                    | 1.43          | 1.38            | 1.06      | -1.11       | -1.20     | -1.01       | 1.01       | -1.14        | 1.39       | 1.26         | 2.12       | 1.55         |
| ZBTB24     | zinc finger and BTB domain                         | chr6q21              | transcription, DNA-dependent                                         | ---                                    | -1.01         | 1.01            | -1.09     | 1.34        | -1.05     | 1.12        | 1.19       | 1.32         | 3.37       | 2.54         | 2.72       | 2.04         |
| ZBTB24     | zinc finger and BTB domain                         | chr6q21              | transcription, DNA-dependent                                         | ---                                    | 1.08          | 1.06            | -1.01     | 1.33        | 1.02      | -1.12       | 1.33       | 1.13         | 2.91       | 1.80         | 2.48       | 1.94         |
| ZBTB24     | zinc finger and BTB domain                         | chr6q21              | transcription, DNA-dependent                                         | ---                                    | 1.04          | -1.19           | 1.07      | 1.17        | 1.08      | 1.04        | -1.23      | -1.06        | -2.09      | -1.90        | -1.32      | -1.33        |
| ZBTB26     | zinc finger and BTB domain                         | chr9q33.2            | transcription, DNA-dependent                                         | ---                                    | 1.10          | 1.02            | -1.14     | -1.08       | -1.02     | 1.14        | -1.21      | -1.06        | -2.53      | -1.79        | -2.76      | -2.87        |
| ZBTB26     | zinc finger and BTB domain                         | chr9q33.2            | transcription, DNA-dependent                                         | ---                                    | 1.02          | -1.15           | -1.23     | -1.23       | 1.30      | 1.10        | 1.40       | 1.16         | -2.03      | -2.03        | -1.06      | -1.05        |

| ID       | Gene Title                         | Chromosomal Location | 1st Gene Ontology Biological Process        | Pathway | A2497 30 mins | A2497P' 30 mins | A2497 2 h | A2497P' 2 h | A2497 4 h | A2497P' 4 h | A2497 24 h | A2497P' 24 h | A2497 48 h | A2497P' 48 h | A2497 72 h | A2497P' 72 h |
|----------|------------------------------------|----------------------|---------------------------------------------|---------|---------------|-----------------|-----------|-------------|-----------|-------------|------------|--------------|------------|--------------|------------|--------------|
| ZBTB33   | zinc finger and BTB domain         | chrXq23              | transcription, DNA-dependent                | ---     | -1.03         | 1.04            | 1.07      | 1.05        | 1.02      | 1.05        | -1.00      | 1.06         | -1.11      | -1.04        | -1.16      | -1.12        |
| ZBTB39   | zinc finger and BTB domain         | chr12q13.3           | transcription, DNA-dependent                | ---     | 1.18          | 1.15            | 1.04      | -1.05       | -1.34     | 1.26        | -1.64      | -1.44        | -1.93      | -1.55        | -1.34      | -1.47        |
| ZBTB40   | zinc finger and BTB domain         | chr17p13.1           | transcription, DNA-dependent                | ---     | -1.03         | -1.00           | -1.07     | -1.05       | -1.05     | 1.03        | -1.04      | -1.02        | -1.11      | 1.03         | -1.12      | -1.04        |
| ZBTB40   | zinc finger and BTB domain         | chr1p36              | transcription, DNA-dependent                | ---     | -1.02         | -1.14           | 1.14      | -1.02       | -1.18     | -1.28       | 1.29       | 1.13         | -1.26      | -1.57        | 1.24       | 1.25         |
| ZBTB40   | zinc finger and BTB domain         | chr1p36              | transcription, DNA-dependent                | ---     | -1.04         | -1.10           | 1.06      | 1.16        | 1.05      | -1.04       | 1.18       | 1.13         | 1.02       | -1.09        | 1.21       | 1.26         |
| ZBTB44   | zinc finger and BTB domain         | chr11q24.3           | transcription, DNA-dependent                | ---     | -1.06         | -1.07           | -1.01     | 1.02        | 1.11      | 1.13        | -1.16      | -1.04        | -1.66      | -1.58        | -1.34      | -1.41        |
| ZBTB44   | zinc finger and BTB domain         | chr11q24.3           | transcription, DNA-dependent                | ---     | -1.14         | -1.17           | 1.09      | 1.12        | -1.04     | -1.07       | -1.10      | -1.10        | -1.61      | -1.32        | -1.13      | -1.05        |
| ZBTB44   | zinc finger and BTB domain         | chr11q24.3           | transcription, DNA-dependent                | ---     | 1.08          | 1.01            | 1.05      | 1.04        | -1.01     | 1.01        | -1.20      | -1.08        | -2.42      | -1.79        | -2.10      | -1.85        |
| ZBTB44   | zinc finger and BTB domain         | chr11q24.3           | transcription, DNA-dependent                | ---     | 1.25          | 1.15            | -1.28     | -1.60       | 1.04      | 1.09        | 1.08       | 1.21         | -2.40      | -3.01        | -3.13      | -2.73        |
| ZBTB44   | zinc finger and BTB domain         | chr11q24.3           | transcription, DNA-dependent                | ---     | 1.50          | 1.29            | 1.01      | 1.20        | 1.11      | 1.27        | 1.45       | 1.07         | -1.33      | 1.18         | 1.05       | 1.44         |
| ZBTB45   | zinc finger and BTB domain         | chr19q13.43          | transcription, DNA-dependent                | ---     | -1.03         | -1.05           | -1.11     | 1.17        | -1.31     | -1.27       | -1.05      | 1.21         | -1.45      | -1.72        | -1.75      | -1.69        |
| ZBTB47   | zinc finger and BTB domain         | chr3p22.1            | transcription, DNA-dependent                | ---     | -1.27         | -1.22           | 1.12      | 1.28        | 1.22      | 1.19        | -1.04      | 1.18         | -1.15      | -1.33        | -1.20      | -1.31        |
| ZBTB47   | zinc finger and BTB domain         | chr3p22.1            | transcription, DNA-dependent                | ---     | 1.10          | -1.03           | 1.21      | 1.13        | -1.08     | 1.11        | -1.28      | 1.20         | -1.67      | -1.59        | -1.28      | 1.01         |
| ZBTB47   | zinc finger and BTB domain         | chr3p22.1            | transcription, DNA-dependent                | ---     | 1.01          | -1.19           | -1.04     | 1.11        | 1.01      | 1.11        | -1.11      | 1.06         | -1.34      | -1.22        | -1.60      | -1.25        |
| ZBTB5    | zinc finger and BTB domain         | chr9p13.2            | transcription, DNA-dependent                | ---     | -1.06         | -1.02           | 1.05      | -1.14       | 1.04      | -1.01       | 1.14       | 1.18         | -1.22      | -1.06        | 1.49       | 1.75         |
| ZBTB6    | zinc finger and BTB domain         | chr9q33.2            | transcription, DNA-dependent                | ---     | 1.21          | 1.01            | 1.21      | 1.09        | -1.02     | -1.02       | -1.07      | -1.11        | -1.28      | 1.07         | 1.56       | -1.15        |
| ZBTB7A   | zinc finger and BTB domain         | chr19p13.3           | negative regulation of transcription from   | ---     | -1.05         | -1.02           | 1.06      | -1.00       | -1.00     | -1.05       | 1.02       | 1.00         | 1.36       | 1.19         | 1.19       | 1.12         |
| ZBTB7A   | zinc finger and BTB domain         | chr19p13.3           | negative regulation of transcription from   | ---     | -1.17         | 1.68            | -1.15     | -1.14       | -1.56     | -1.21       | -1.30      | -1.41        | 1.79       | 1.58         | -1.18      | -1.41        |
| ZBTB7A   | zinc finger and BTB domain         | chr19p13.3           | negative regulation of transcription from   | ---     | 1.06          | 1.03            | 1.07      | -1.34       | 1.21      | 1.18        | -1.09      | -1.14        | 1.34       | 1.18         | 1.16       | 1.04         |
| ZBTB7A   | zinc finger and BTB domain         | chr19p13.3           | negative regulation of transcription from   | ---     | 1.10          | 1.13            | 1.17      | 1.06        | -1.09     | -1.02       | -1.34      | -1.18        | 1.15       | 1.09         | 1.22       | 1.09         |
| ZBTB7B   | zinc finger and BTB domain         | chr1q21.3            | transcription, DNA-dependent                | ---     | 1.29          | 1.01            | -1.00     | -1.07       | -1.01     | 1.18        | 1.06       | -1.17        | 1.74       | 1.51         | 1.20       | 1.19         |
| ZBTB7C   | zinc finger and BTB domain         | chr18q21.1           | 0                                           | ---     | -1.08         | -1.08           | 1.03      | 1.00        | 1.10      | -1.02       | 1.15       | 1.05         | 1.56       | 1.42         | 1.43       | 1.42         |
| ZC2HC1A  | zinc finger, C2HC-type coiled-coil | chr8q21.12           | 0                                           | ---     | 1.23          | 1.21            | 1.02      | -1.19       | -1.13     | 1.10        | -1.38      | -1.01        | -2.27      | -1.76        | -1.94      | -2.28        |
| ZC2HC1A  | zinc finger, C2HC-type coiled-coil | chr8q21.12           | 0                                           | ---     | -1.14         | -1.03           | 1.18      | 1.06        | 1.28      | 1.13        | -1.04      | -1.08        | -1.87      | -1.63        | -1.32      | -1.38        |
| ZC2HC1B  | zinc finger, C2HC-type coiled-coil | chr6q24.2            | 0                                           | ---     | 6.94          | 2.34            | -2.77     | -2.67       | -2.62     | 1.16        | 1.36       | 1.35         | -1.26      | -5.51        | -5.72      | -1.21        |
| ZC3H12A  | zinc finger CCCH-type coiled-coil  | chr1p34.3            | angiogenesis                                | ---     | 1.34          | -1.10           | 1.10      | 1.17        | -1.10     | -1.03       | -1.00      | 1.23         | 2.83       | 2.11         | -1.10      | 1.84         |
| ZC3H12B  | zinc finger CCCH-type coiled-coil  | chrXq12              | nucleic acid phosphodiester bond hydrolysis | ---     | 1.29          | 1.35            | 1.30      | 1.23        | 1.15      | 1.62        | 1.00       | -1.31        | -2.89      | -1.74        | -1.61      | -2.25        |
| ZC3H12C  | zinc finger CCCH-type coiled-coil  | chr11q22.3           | nucleic acid phosphodiester bond hydrolysis | ---     | 3.21          | -1.15           | -1.74     | -1.15       | 1.30      | -1.61       | 1.73       | 3.25         | 2.62       | 2.28         | 2.44       | 1.38         |
| ZC3H12D  | zinc finger CCCH-type coiled-coil  | chr6q25.1            | negative regulation of cell growth          | ---     | 1.44          | 1.82            | 1.49      | 1.30        | 2.13      | 1.54        | 1.17       | 1.51         | -2.43      | -2.22        | -3.30      | -2.51        |
| ZC3H14   | zinc finger CCCH-type coiled-coil  | chr14q31.3           | 0                                           | ---     | 1.11          | 1.18            | 1.09      | -1.00       | 1.12      | 1.06        | -1.32      | -1.12        | -3.01      | -3.06        | -2.88      | -3.36        |
| ZC3H14   | zinc finger CCCH-type coiled-coil  | chr14q31.3           | 0                                           | ---     | 1.03          | -1.01           | 1.01      | 1.07        | -1.01     | 1.01        | 1.04       | -1.05        | -1.38      | -1.50        | -1.44      | -1.27        |
| ZC3H14   | zinc finger CCCH-type coiled-coil  | chr14q31.3           | 0                                           | ---     | 1.03          | 1.06            | 1.08      | -1.01       | -1.00     | 1.14        | -1.44      | -1.22        | -3.22      | -2.33        | -2.57      | -2.89        |
| ZC3H18   | zinc finger CCCH-type coiled-coil  | chr16q24.2           | 0                                           | ---     | -1.07         | -1.05           | 1.00      | 1.00        | 1.07      | 1.01        | 1.04       | 1.06         | 1.05       | -1.01        | 1.15       | 1.14         |
| ZC3H4    | zinc finger CCCH-type coiled-coil  | chr19q13.32          | 0                                           | ---     | -1.05         | -1.06           | -1.11     | -1.08       | -1.05     | -1.05       | -1.10      | -1.05        | -1.58      | -1.70        | -1.25      | -1.32        |
| ZC3H6    | zinc finger CCCH-type coiled-coil  | chr2q13              | 0                                           | ---     | 1.13          | 1.16            | 1.26      | 2.07        | 1.56      | 1.34        | 1.33       | 1.37         | 1.33       | 1.42         | 1.32       | 1.34         |
| ZC3H8    | zinc finger CCCH-type coiled-coil  | chr2q13              | transcription, DNA-dependent                | ---     | 1.34          | 1.31            | 1.08      | 1.07        | -1.05     | 1.00        | -1.07      | 1.01         | -1.31      | -1.43        | 1.48       | 1.34         |
| ZC3HAV1  | zinc finger CCCH-type, anti-viral  | chr7q34              | response to virus                           | ---     | 1.23          | 1.09            | 1.16      | 1.06        | 1.05      | 1.28        | 1.95       | 1.59         | 2.43       | 1.91         | 1.40       | 1.30         |
| ZC3HAV1L | zinc finger CCCH-type, anti-viral  | chr7q34              | 0                                           | ---     | 1.48          | 1.19            | 1.30      | 1.03        | 1.03      | 1.34        | -1.16      | -1.17        | -1.20      | -1.28        | 2.08       | 1.38         |
| ZC3HAV1L | zinc finger CCCH-type, anti-viral  | chr7q34              | 0                                           | ---     | 1.19          | 1.24            | -1.17     | -1.27       | -1.30     | -1.01       | -1.46      | -1.23        | -1.78      | -1.22        | -1.44      | -1.28        |
| ZCCHC11  | zinc finger, CCHC domain           | chr1p32.3            | cytokine production                         | ---     | 1.32          | 1.42            | 1.07      | 1.05        | 1.14      | 1.14        | -1.04      | 1.08         | -1.69      | -1.52        | -1.00      | -1.60        |
| ZCCHC14  | zinc finger, CCHC domain           | chr16q24.2           | cell communication                          | ---     | 1.79          | 1.83            | -1.33     | 2.74        | -1.86     | -1.61       | -4.26      | -1.52        | 4.83       | 3.72         | 1.48       | 1.78         |
| ZCCHC14  | zinc finger, CCHC domain           | chr16q24.2           | cell communication                          | ---     | 1.21          | 1.13            | -1.17     | 1.18        | -1.09     | 1.04        | 1.15       | 1.36         | 1.68       | 1.40         | 1.95       | 1.40         |
| ZCCHC17  | zinc finger, CCHC domain           | chr1p35.2            | 0                                           | ---     | -1.08         | -1.07           | 1.03      | 1.00        | 1.02      | -1.01       | 1.00       | -1.02        | -1.11      | 1.01         | 1.14       | 1.17         |
| ZCCHC17  | zinc finger, CCHC domain           | chr1p35.2            | 0                                           | ---     | -1.04         | -1.00           | 1.01      | -1.03       | 1.11      | -1.00       | 1.05       | -1.01        | 1.24       | 1.10         | 1.26       | 1.22         |
| ZCCHC18  | zinc finger, CCHC domain           | chrXq22.2            | 0                                           | ---     | 2.18          | 1.23            | 1.44      | 1.35        | 1.75      | 1.14        | -1.69      | -1.96        | -1.14      | -1.39        | -3.54      | -2.98        |
| ZCCHC2   | zinc finger, CCHC domain           | chr18q21.33          | cell communication                          | ---     | 1.15          | 1.10            | 1.12      | 1.54        | 1.23      | 1.22        | 2.72       | 1.73         | 2.40       | 1.79         | -1.08      | 1.01         |
| ZCCHC24  | zinc finger, CCHC domain           | chr10q22.3           | 0                                           | ---     | -1.18         | -1.21           | 1.12      | 1.13        | 1.23      | 1.01        | -1.14      | 1.06         | -1.37      | -1.52        | -1.85      | -1.52        |
| ZCCHC24  | zinc finger, CCHC domain           | chr10q22.3           | 0                                           | ---     | 1.14          | 1.16            | 1.12      | 1.04        | 1.11      | 1.08        | -1.24      | 1.04         | -1.62      | -1.61        | -1.74      | -1.69        |
| ZCCHC3   | zinc finger, CCHC domain           | chr20p13-p12.2       | 0                                           | ---     | 1.13          | 1.13            | -1.15     | -1.10       | -1.27     | -1.00       | -1.10      | 1.11         | -1.71      | -1.30        | -1.58      | -1.78        |
| ZCCHC4   | zinc finger, CCHC domain           | chr4p15.2            | methylation                                 | ---     | 1.11          | -1.80           | 1.26      | -1.03       | -1.48     | -1.07       | -1.07      | 1.36         | 1.06       | -1.03        | 1.43       | 1.21         |
| ZCCHC4   | zinc finger, CCHC domain           | chr4p15.2            | methylation                                 | ---     | 1.04          | -1.06           | -1.05     | -1.29       | 1.21      | 1.11        | -1.60      | -1.28        | -1.69      | -1.06        | 1.13       | 1.18         |
| ZCCHC6   | zinc finger, CCHC domain           | chr9q21              | RNA 3'-end processing                       | ---     | 1.12          | 1.01            | 1.36      | 1.41        | 1.83      | 1.25        | -1.03      | 1.17         | -1.08      | 2.68         | 1.83       | 1.09         |
| ZCCHC7   | zinc finger, CCHC domain           | chr9p13.2            | 0                                           | ---     | 1.02          | 1.09            | 1.16      | 1.10        | 1.14      | 1.19        | 1.13       | 1.15         | -1.03      | -1.08        | 1.72       | 1.55         |
| ZCCHC7   | zinc finger, CCHC domain           | chr9p13.2            | 0                                           | ---     | -1.04         | 1.25            | 1.14      | -1.05       | 1.10      | 1.00        | 1.29       | 1.50         | -1.10      | -1.00        | 1.51       | 1.22         |
| ZCCHC7   | zinc finger, CCHC domain           | chr9p13.2            | 0                                           | ---     | 1.61          | 1.71            | 1.29      | 1.22        | 1.43      | 1.46        | -1.15      | -1.82        | -1.68      | -2.27        | -1.91      | -1.89        |
| ZCCHC8   | zinc finger, CCHC domain           | chr12q24.31          | mRNA splicing, via spliceosome              | ---     | 1.34          | -1.06           | 1.16      | -1.00       | -1.25     | -1.06       | 1.05       | 1.01         | -2.80      | -2.27        | -1.44      | -1.50        |
| ZCCHC8   | zinc finger, CCHC domain           | chr12q24.31          | mRNA splicing, via spliceosome              | ---     | 1.04          | -1.03           | -1.02     | -1.07       | -1.03     | 1.15        | -1.20      | -1.04        | -1.52      | -1.69        | -1.29      | -1.27        |
| ZCWPW1   | zinc finger, CW type with zinc     | chr7q22.1            | 0                                           | ---     | -1.27         | -1.40           | -1.45     | -1.43       | 1.25      | 1.20        | 1.25       | 1.53         | -1.29      | -1.27        | -1.17      | 1.12         |
| ZCWPW2   | zinc finger, CW type with zinc     | chr3p24.1            | 0                                           | ---     | 5.64          | 4.53            | -1.81     | 1.31        | -2.01     | -1.35       | 3.27       | -1.05        | 1.35       | 1.26         | -1.54      | 1.44         |
| ZDHHC11  | zinc finger, DHHC-type coiled-coil | chr5p15.33           | 0                                           | ---     | 1.25          | -2.19           | 1.20      | -1.63       | 1.21      | -1.27       | 1.09       | -1.08        | 1.98       | 1.04         | 2.52       | 1.92         |
| ZDHHC13  | zinc finger, DHHC-type coiled-coil | chr11p15.1           | transport                                   | ---     | 1.37          | 1.37            | 1.15      | -1.05       | -1.11     | -1.10       | -1.13      | -1.11        | -1.91      | -1.79        | -1.80      | -2.79        |
| ZDHHC13  | zinc finger, DHHC-type coiled-coil | chr11p15.1           | transport                                   | ---     | 1.03          | 1.31            | -1.38     | -1.09       | -1.21     | 1.38        | -1.31      | -1.75        | -2.52      | -1.60        | -2.70      | -3.48        |
| ZDHHC14  | zinc finger, DHHC-type coiled-coil | chr6q25.3            | 0                                           | ---     | 1.11          | 1.02            | 1.41      | 1.16        | -1.14     | -1.16       | 1.46       | 1.57         | -1.77      | -1.75        | -1.53      | -1.46        |
| ZDHHC14  | zinc finger, DHHC-type coiled-coil | chr6q25.3            | 0                                           | ---     | -1.05         | -1.14           | 1.06      | 1.03        | -1.07     | -1.26       | -1.09      | -1.10        | -1.43      | -2.03        | -1.69      | -1.58        |
| ZDHHC16  | zinc finger, DHHC-type coiled-coil | chr10q24.1           | apoptotic process                           | ---     | 1.01          | -1.03           | -1.08     | 1.09        | 1.05      | 1.01        | -1.03      | -1.05        | -1.34      | -1.40        | -1.42      | -1.20        |
| ZDHHC17  | zinc finger, DHHC-type coiled-coil | chr12q21.2           | transport                                   | ---     | 1.13          | 1.06            | -1.01     | -1.03       | -1.09     | 1.03        | -1.22      | -1.11        | -1.83      | -1.60        | -1.66      | -1.79        |

| ID      | Gene Title                    | Chromosomal Location | 1st Gene Ontology Biological Process      | Pathway                               | A2497 30 mins | A2497P' 30 mins | A2497 2 h | A2497P' 2 h | A2497 4 h | A2497P' 4 h | A2497 24 h | A2497P' 24 h | A2497 48 h | A2497P' 48 h | A2497 72 h | A2497P' 72 h |
|---------|-------------------------------|----------------------|-------------------------------------------|---------------------------------------|---------------|-----------------|-----------|-------------|-----------|-------------|------------|--------------|------------|--------------|------------|--------------|
| ZDHC2   | zinc finger, DHHC-type co     | chr8p22              | multicellular organismal development      | ---                                   | 1.13          | 1.07            | -1.01     | 1.10        | -1.01     | 1.18        | -1.33      | -1.13        | -1.58      | -1.43        | -1.51      | -1.83        |
| ZDHC2   | zinc finger, DHHC-type co     | chr8p22              | multicellular organismal development      | ---                                   | -1.01         | -1.14           | 1.12      | -1.04       | -1.07     | -1.12       | -1.24      | -1.29        | -2.64      | -1.76        | -2.36      | -3.39        |
| ZDHC2   | zinc finger, DHHC-type co     | chr8p22              | multicellular organismal development      | ---                                   | -1.08         | -1.01           | -1.02     | -1.07       | 1.03      | -1.00       | 1.13       | -1.03        | 1.17       | 1.17         | 1.27       | 1.28         |
| ZDHC21  | zinc finger, DHHC-type co     | chr9q22.3            | hair follicle development                 | ---                                   | -1.02         | 1.40            | 1.63      | 1.36        | 1.11      | -1.01       | 1.15       | -1.25        | -2.17      | -1.25        | 1.19       | -1.13        |
| ZDHC21  | zinc finger, DHHC-type co     | chr9q22.3            | hair follicle development                 | ---                                   | 1.99          | 1.13            | 1.24      | 1.19        | 2.58      | 2.60        | -1.09      | 1.13         | -1.60      | -2.61        | -1.51      | -1.78        |
| ZDHC21  | zinc finger, DHHC-type co     | chr9q22.3            | hair follicle development                 | ---                                   | -1.15         | -1.08           | 1.10      | 1.07        | 1.04      | 1.07        | 1.02       | -1.02        | -1.89      | -2.18        | -2.25      | -2.47        |
| ZDHC23  | zinc finger, DHHC-type co     | chr3q13.31           | protein palmitoylation                    | ---                                   | 1.01          | 1.15            | 1.24      | 1.21        | 1.04      | -1.05       | -1.02      | 1.11         | -1.46      | -1.27        | -1.31      | -1.34        |
| ZDHC24  | zinc finger, DHHC-type co     | chr11q13.2           | 0                                         | ---                                   | 1.06          | -1.02           | 1.02      | 1.19        | -1.14     | -1.22       | 1.30       | 1.33         | 1.37       | 1.25         | 1.37       | 1.28         |
| ZDHC3   | zinc finger, DHHC-type co     | chr3p21.31           | protein targeting                         | ---                                   | 1.11          | 1.10            | 1.00      | -1.01       | -1.05     | 1.02        | 1.09       | -1.06        | 1.32       | 1.19         | 1.49       | 1.42         |
| ZDHC3   | zinc finger, DHHC-type co     | chr3p21.31           | protein targeting                         | ---                                   | -1.07         | -1.04           | 1.05      | -1.02       | 1.14      | -1.01       | 1.11       | -1.04        | -1.58      | -1.40        | -1.40      | -1.49        |
| ZDHC3   | zinc finger, DHHC-type co     | chr3p21.31           | protein targeting                         | ---                                   | -1.16         | -1.02           | -1.04     | -1.07       | -1.10     | -1.24       | 1.01       | 1.18         | 1.45       | 1.33         | 1.51       | 1.39         |
| ZDHC4   | zinc finger, DHHC-type co     | chr7p22.1            | oxidation-reduction process               | ---                                   | 1.02          | 1.16            | 3.12      | 3.68        | 1.00      | -1.19       | 1.28       | 1.17         | -1.97      | -1.52        | -1.55      | -1.47        |
| ZDHC4   | zinc finger, DHHC-type co     | chr7p22.1            | oxidation-reduction process               | ---                                   | -1.02         | 1.01            | 1.03      | 1.10        | -1.01     | 1.02        | 1.04       | 1.04         | -1.23      | -1.18        | 1.05       | 1.09         |
| ZDHC6   | zinc finger, DHHC-type co     | chr10q25.2           | 0                                         | ---                                   | 1.04          | 1.03            | -1.02     | 1.01        | 1.03      | 1.02        | -1.22      | -1.14        | -1.45      | -1.46        | -1.56      | -1.52        |
| ZDHC8   | zinc finger, DHHC-type co     | chr22q11.21          | multicellular organismal development      | ---                                   | 2.95          | 4.79            | -1.62     | -4.69       | 1.19      | -1.22       | 2.67       | 2.01         | 2.08       | 1.61         | 1.17       | 1.18         |
| ZDHC9   | zinc finger, DHHC-type co     | chrXq26.1            | 0                                         | ---                                   | -1.02         | -1.04           | -1.01     | -1.07       | 1.02      | 1.07        | -1.11      | -1.12        | -1.12      | 1.19         | 1.21       | 1.22         |
| ZEB2    | zinc finger E-box binding     | chr2q22.3            | neural crest cell migration               | TGF_Beta_Signaling_Pathway // GenMAPP | -1.16         | -1.16           | -1.17     | 1.08        | -1.11     | 1.37        | 2.22       | 2.26         | 1.11       | 1.46         | 1.41       | 1.28         |
| ZER1    | zyg-11 related, cell cycle re | chr9q34.11           | ATP hydrolysis coupled proton transport   | ---                                   | -1.12         | -1.14           | -1.02     | 1.08        | -1.04     | 1.02        | 1.02       | 1.02         | -1.09      | -1.11        | -1.33      | 1.02         |
| ZFAND2A | zinc finger, AN1-type dom     | chr7p22.3            | 0                                         | ---                                   | -1.08         | -1.12           | -1.01     | 1.06        | 1.10      | -1.10       | 1.31       | 1.33         | 1.85       | 1.16         | 1.82       | 1.61         |
| ZFAND2B | zinc finger, AN1-type dom     | chr2q35              | 0                                         | ---                                   | -1.00         | -1.08           | -1.09     | 1.08        | -1.01     | -1.00       | 1.25       | 1.09         | 1.68       | 1.63         | 1.46       | 1.50         |
| ZFAND3  | zinc finger, AN1-type dom     | chr6pter-p22.3       | 0                                         | ---                                   | -1.15         | -1.09           | 1.05      | -1.13       | 1.11      | -1.05       | 1.14       | 1.02         | 1.15       | -1.07        | 1.28       | 1.17         |
| ZFAND3  | zinc finger, AN1-type dom     | chr6pter-p22.3       | 0                                         | ---                                   | -1.06         | -1.28           | -1.09     | -1.05       | -1.00     | -1.14       | 1.20       | 1.00         | 1.52       | 1.29         | 1.58       | 1.61         |
| ZFAND4  | zinc finger, AN1-type dom     | chr10q11.22          | 0                                         | ---                                   | 1.03          | 1.06            | -1.14     | -1.18       | 1.23      | 1.04        | -1.84      | -1.29        | -1.54      | -1.13        | -2.03      | -2.27        |
| ZFAND5  | zinc finger, AN1-type dom     | chr9q13-q21          | in utero embryonic development            | ---                                   | 1.13          | 1.12            | 1.16      | 1.18        | -1.10     | -1.04       | 1.08       | 1.05         | 2.02       | 1.55         | 3.00       | 2.45         |
| ZFAND5  | zinc finger, AN1-type dom     | chr9q13-q21          | in utero embryonic development            | ---                                   | 1.14          | 1.19            | -1.05     | -1.02       | -1.07     | 1.01        | -1.20      | -1.17        | -1.29      | -1.32        | -1.11      | -1.27        |
| ZFAND5  | zinc finger, AN1-type dom     | chr9q13-q21          | in utero embryonic development            | ---                                   | 1.03          | 1.02            | 1.14      | 1.10        | 1.29      | 1.39        | 1.16       | 1.20         | 1.45       | 1.16         | 1.91       | 1.66         |
| ZFAND6  | zinc finger, AN1-type dom     | chr15q25.1           | protein targeting to peroxisome           | ---                                   | 1.22          | 1.30            | 1.18      | -1.06       | 1.15      | 1.28        | 1.01       | -1.08        | -1.38      | -1.72        | -1.33      | -1.64        |
| ZFAS1   | ZNFX1 antisense RNA 1         | chr20q13.13          | 0                                         | ---                                   | -1.16         | -1.12           | -1.01     | -1.02       | 1.02      | -1.05       | 1.20       | 1.09         | 1.31       | 1.11         | 1.22       | 1.20         |
| ZFAS1   | ZNFX1 antisense RNA 1         | chr20q13.13          | 0                                         | ---                                   | -1.16         | -1.07           | -1.02     | -1.04       | 1.03      | -1.07       | 1.14       | 1.10         | 1.24       | 1.06         | 1.14       | 1.16         |
| ZFC3H1  | zinc finger, C3H1-type con    | chr12q21.1           | RNA processing                            | ---                                   | 1.33          | 1.46            | 1.04      | -1.16       | 1.01      | -1.18       | 1.27       | 1.28         | 3.39       | 2.50         | 1.67       | 1.22         |
| ZFC3H1  | zinc finger, C3H1-type con    | chr12q21.1           | RNA processing                            | ---                                   | 1.00          | 1.05            | 1.01      | -1.04       | 1.04      | -1.02       | -1.07      | -1.08        | 1.15       | 1.08         | 1.32       | 1.21         |
| ZFH3    | zinc finger homeobox 3        | chr16q22.3           | negative regulation of transcription from | ---                                   | -1.09         | -1.04           | 1.03      | -1.08       | -1.08     | -1.01       | -1.03      | -1.04        | -1.36      | -1.30        | -1.51      | -1.44        |
| ZFH3    | zinc finger homeobox 3        | chr16q22.3           | negative regulation of transcription from | ---                                   | -1.07         | -1.18           | 1.37      | 1.25        | 1.28      | 1.09        | 1.35       | -1.02        | -1.04      | -1.19        | 1.07       | 1.07         |
| ZFH4    | zinc finger homeobox 4        | chr8q21.11           | transcription, DNA-dependent              | ---                                   | 1.37          | -1.35           | 1.86      | 3.45        | 1.78      | 1.04        | -2.10      | -1.52        | 14.22      | 8.49         | -4.11      | 2.68         |
| ZFP112  | zinc finger protein 112 hom   | chr19q13.2           | transcription, DNA-dependent              | ---                                   | 1.09          | 1.05            | 1.13      | 1.16        | 1.08      | 1.02        | -1.07      | -1.12        | -2.73      | -2.29        | -2.89      | -2.88        |
| ZFP3    | ZFP3 zinc finger protein      | chr17p13.2           | transcription, DNA-dependent              | ---                                   | 1.14          | 1.38            | -1.29     | -1.58       | 1.11      | 1.12        | -1.51      | -1.18        | -5.65      | -4.25        | -4.61      | -5.74        |
| ZFP30   | ZFP30 zinc finger protein     | chr19q13.12          | transcription, DNA-dependent              | ---                                   | 1.31          | 1.39            | 1.07      | -1.20       | -1.21     | -1.06       | -1.34      | -1.00        | -1.68      | -2.18        | -1.51      | -2.04        |
| ZFP36   | ZFP36 ring finger protein     | chr19q13.1           | negative regulation of transcription from | ---                                   | 1.25          | 1.33            | 1.01      | -1.22       | -1.21     | -1.24       | 1.31       | -1.03        | 4.75       | 3.69         | 6.07       | 3.50         |
| ZFP36L1 | ZFP36 ring finger protein-l   | chr14q22-q24         | nuclear-transcribed mRNA catabolic pro    | ---                                   | -1.36         | -1.61           | -1.11     | -1.40       | 1.62      | 1.43        | -1.80      | -1.13        | -1.47      | -1.49        | -1.84      | 1.29         |
| ZFP41   | ZFP41 zinc finger protein     | chr8q24.3            | transcription, DNA-dependent              | ---                                   | -2.95         | -4.66           | -1.09     | -3.17       | -1.83     | -1.23       | -4.49      | -1.27        | -1.65      | -1.17        | -2.77      | -2.72        |
| ZFP41   | ZFP41 zinc finger protein     | chr8q24.3            | transcription, DNA-dependent              | ---                                   | -1.15         | -1.20           | -1.13     | -1.04       | 1.67      | 1.20        | 1.15       | -1.09        | -1.37      | -1.70        | -1.62      | -1.50        |
| ZFP41   | ZFP41 zinc finger protein     | chr8q24.3            | transcription, DNA-dependent              | ---                                   | -1.06         | -1.19           | -1.10     | -1.08       | 1.22      | 1.31        | -1.23      | -1.43        | -1.44      | -1.91        | -2.68      | -2.80        |
| ZFP42   | ZFP42 zinc finger protein     | chr4q35.2            | in utero embryonic development            | ---                                   | -5.79         | -1.13           | 3.82      | 2.96        | -1.05     | 1.32        | -1.03      | 1.60         | 1.88       | 1.70         | -1.88      | 1.29         |
| ZFP62   | ZFP62 zinc finger protein     | chr5q35.3            | transcription, DNA-dependent              | ---                                   | 1.06          | -1.02           | -1.04     | 1.11        | 1.05      | 1.02        | -1.05      | -1.02        | -1.32      | -1.21        | -1.21      | -1.12        |
| ZFP64   | ZFP64 zinc finger protein     | chr20q13.2           | transcription, DNA-dependent              | ---                                   | -1.06         | 1.10            | 1.01      | -1.22       | 1.15      | -1.12       | 1.01       | 1.24         | -1.37      | -1.03        | -1.26      | -1.15        |
| ZFP69   | ZFP69 zinc finger protein     | chr1p34.2            | transcription, DNA-dependent              | ---                                   | 1.09          | 1.09            | 1.07      | 1.06        | 1.08      | 1.04        | -1.17      | 1.23         | -1.40      | -1.53        | -1.46      | -1.45        |
| ZFP82   | ZFP82 zinc finger protein     | chr19q13.12          | transcription, DNA-dependent              | ---                                   | 1.05          | 1.26            | 1.21      | 1.27        | 1.09      | 1.08        | 1.06       | -1.03        | 1.02       | 1.04         | 1.36       | 1.53         |
| ZFP90   | ZFP90 zinc finger protein     | chr16q22.1           | negative regulation of transcription from | ---                                   | 1.06          | -1.06           | 1.05      | 1.29        | -1.14     | 1.15        | -1.20      | 1.01         | -1.80      | -1.57        | -1.68      | -1.13        |
| ZFP90   | ZFP90 zinc finger protein     | chr16q22.1           | negative regulation of transcription from | ---                                   | 1.34          | 1.28            | -1.12     | -1.05       | 1.01      | 1.20        | -1.48      | -1.10        | -3.18      | -1.88        | -1.64      | -1.17        |
| ZFPL1   | zinc finger protein-like 1    | chr11q13             | regulation of transcription, DNA-depend   | ---                                   | -1.26         | -1.29           | 1.13      | 1.13        | 1.03      | -1.23       | 1.14       | -1.01        | 1.37       | 1.40         | 1.62       | 1.84         |
| ZFPL1   | zinc finger protein-like 1    | chr11q13             | regulation of transcription, DNA-depend   | ---                                   | -1.01         | -1.13           | 1.07      | 1.08        | -1.05     | -1.01       | 1.12       | 1.15         | 1.45       | 1.29         | 1.25       | 1.51         |
| ZFPL1   | zinc finger protein-like 1    | chr11q13             | regulation of transcription, DNA-depend   | ---                                   | -1.29         | -1.39           | -1.04     | 1.04        | 1.31      | -1.00       | -1.15      | 1.07         | 1.34       | 1.68         | 1.99       | 2.04         |
| ZFPM1   | zinc finger protein, FOG fac  | chr16q24.2           | negative regulation of transcription from | ---                                   | -1.04         | -2.04           | 2.38      | -1.08       | -2.10     | 1.45        | -1.45      | 1.11         | -2.52      | -1.24        | 2.45       | 1.44         |
| ZFR     | zinc finger RNA binding pr    | chr5p13.3            | multicellular organismal development      | Circadian_Exercise // GenMAPP         | 1.10          | 1.07            | -1.04     | 1.04        | -1.02     | 1.06        | -1.19      | -1.15        | -1.20      | -1.15        | -1.11      | -1.22        |
| ZFX     | zinc finger protein, X-link   | chrXp21.3            | transcription, DNA-dependent              | ---                                   | 1.42          | 1.46            | 1.25      | 1.05        | 1.12      | 1.23        | 1.10       | 1.07         | -1.28      | -1.10        | 1.45       | -1.01        |
| ZFX     | zinc finger protein, X-link   | chrXp21.3            | transcription, DNA-dependent              | ---                                   | 1.18          | 1.23            | 1.06      | -1.13       | 1.07      | 1.04        | -1.29      | -1.13        | -1.87      | -1.66        | -1.36      | -1.67        |
| ZFX     | zinc finger protein, X-link   | chrXp21.3            | transcription, DNA-dependent              | ---                                   | 1.12          | 1.04            | 1.14      | 1.12        | -1.03     | 1.25        | -1.33      | -1.13        | -1.73      | -1.26        | -1.44      | -1.51        |
| ZFY     | zinc finger protein, Y-link   | chrYp11.3            | ovarian follicle development              | ---                                   | -5.00         | -1.09           | 1.57      | -2.63       | 4.43      | 1.93        | 1.96       | -2.81        | 16.98      | 17.13        | 1.67       | -1.22        |
| ZFYVE16 | zinc finger, FYVE domain      | chr5q14              | protein targeting to lysosome             | ---                                   | 2.65          | 1.48            | 1.18      | -1.16       | 1.65      | -1.06       | -1.04      | -1.07        | -1.45      | -1.67        | -3.32      | -2.66        |
| ZFYVE16 | zinc finger, FYVE domain      | chr5q14              | protein targeting to lysosome             | ---                                   | 1.03          | 1.03            | -1.04     | 1.00        | 1.01      | 1.02        | -1.13      | -1.08        | -1.54      | -1.42        | -1.56      | -1.60        |
| ZFYVE16 | zinc finger, FYVE domain      | chr5q14              | protein targeting to lysosome             | ---                                   | -1.02         | 1.08            | 1.15      | 1.20        | 1.00      | -1.01       | -1.36      | -1.20        | -2.44      | -2.27        | -2.38      | -2.21        |
| ZFYVE20 | zinc finger, FYVE domain      | chr3p25.1            | transport                                 | ---                                   | -1.11         | -1.09           | 1.10      | 1.04        | 1.05      | 1.01        | -1.05      | -1.04        | 1.00       | 1.09         | 1.14       | 1.24         |
| ZFYVE20 | zinc finger, FYVE domain      | chr3p25.1            | transport                                 | ---                                   | -1.35         | -1.12           | 1.24      | 1.26        | 1.18      | 1.17        | 1.18       | 1.16         | 1.40       | 1.18         | -1.09      | 1.16         |
| ZFYVE20 | zinc finger, FYVE domain      | chr3p25.1            | transport                                 | ---                                   | -2.55         | -1.84           | -1.22     | 1.21        | 1.03      | 1.45        | 1.06       | -1.06        | 2.61       | 2.28         | 1.54       | 1.74         |
| ZFYVE21 | zinc finger, FYVE domain      | chr14q32.33          | 0                                         | ---                                   | 1.02          | 1.00            | 1.05      | -1.08       | -1.08     | -1.12       | 1.02       | 1.03         | 1.33       | 1.20         | 1.34       | 1.28         |
| ZFYVE21 | zinc finger, FYVE domain      | chr14q32.33          | 0                                         | ---                                   | 1.13          | -1.15           | -1.01     | -1.04       | -1.21     | -1.13       | -1.06      | -1.16        | 1.39       | 1.20         | 1.47       | 1.47         |

| ID                       | Gene Title                   | Chromosomal Location | 1st Gene Ontology Biological Process      | Pathway                                   | A2497 30 mins | A2497P' 30 mins | A2497 2 h | A2497P' 2 h | A2497 4 h | A2497P' 4 h | A2497 24 h | A2497P' 24 h | A2497 48 h | A2497P' 48 h | A2497 72 h | A2497P' 72 h |
|--------------------------|------------------------------|----------------------|-------------------------------------------|-------------------------------------------|---------------|-----------------|-----------|-------------|-----------|-------------|------------|--------------|------------|--------------|------------|--------------|
| ZFYVE28                  | zinc finger, FYVE domain     | chr4p16.3            | negative regulation of epidermal growth   | ---                                       | 1.57          | 1.57            | -1.34     | -1.11       | 1.53      | 1.38        | -1.70      | -1.78        | -1.48      | -1.18        | -2.00      | -1.49        |
| ZHX1                     | zinc fingers and homeobox    | chr8p24.13           | negative regulation of transcription from | ---                                       | -1.13         | -1.16           | 1.20      | 1.17        | 1.42      | 1.19        | -1.16      | -1.30        | -1.23      | -1.15        | -1.49      | -1.25        |
| ZHX1-C8ORF76 readthrough |                              | chr8q                | 0                                         | Integrin-mediated_cell_adhesion_KEGG // C | -1.29         | -1.28           | 1.03      | 1.13        | 1.19      | 1.04        | 1.49       | 1.46         | 2.08       | 1.63         | 2.03       | 1.92         |
| ZIC1                     | Zic family member 1          | chr3q24              | transcription, DNA-dependent              | ---                                       | 1.06          | 1.01            | -1.04     | -1.07       | -1.75     | 1.00        | 1.06       | 1.12         | -2.78      | -2.37        | -1.87      | -1.93        |
| ZKSCAN1                  | zinc finger with KRAB and    | chr7q22              | transcription, DNA-dependent              | ---                                       | -1.15         | -1.21           | 1.57      | 1.60        | -1.03     | -1.07       | -1.22      | -1.40        | 1.13       | 1.15         | 1.32       | 1.34         |
| ZKSCAN3                  | zinc finger with KRAB and    | chr6p22.1            | transcription, DNA-dependent              | ---                                       | 1.78          | 1.01            | -1.75     | -1.36       | 1.87      | 1.65        | -1.51      | -1.94        | -3.55      | -3.70        | -1.35      | -1.84        |
| ZKSCAN3                  | zinc finger with KRAB and    | chr6p22.1            | transcription, DNA-dependent              | ---                                       | -1.01         | 1.51            | 1.44      | 1.12        | 1.18      | 1.07        | -1.66      | -1.31        | -2.41      | -2.18        | -1.36      | -1.30        |
| ZKSCAN3                  | zinc finger with KRAB and    | chr6p22.1            | transcription, DNA-dependent              | ---                                       | 1.21          | 1.01            | 1.16      | 1.33        | 1.04      | -1.55       | -1.48      | -1.54        | -2.00      | -3.03        | -2.41      | -2.23        |
| ZKSCAN5                  | zinc finger with KRAB and    | chr7q22              | transcription, DNA-dependent              | ---                                       | -1.12         | -1.19           | 1.08      | -1.06       | -1.07     | -1.07       | -1.24      | -1.10        | -1.39      | -1.12        | 1.07       | 1.18         |
| ZKSCAN5                  | zinc finger with KRAB and    | chr7q22              | transcription, DNA-dependent              | ---                                       | -1.08         | -1.00           | 1.07      | 1.16        | 1.07      | -1.06       | -1.10      | 1.01         | 1.12       | 1.15         | 1.40       | 1.45         |
| ZKSCAN7                  | zinc finger with KRAB and    | chr3p21.32           | transcription, DNA-dependent              | ---                                       | -1.36         | -1.24           | 1.10      | -1.12       | -1.01     | 1.22        | -1.65      | -1.35        | -4.30      | -3.19        | -2.22      | -2.58        |
| ZMAT2                    | zinc finger, matrin-type 2   | chr5q31.3            | 0                                         | ---                                       | -1.05         | -1.02           | -1.03     | 1.01        | -1.01     | 1.01        | -1.00      | 1.10         | 1.10       | 1.18         | -1.02      | -1.00        |
| ZMAT3                    | zinc finger, matrin-type 3   | chr3q26.32           | transport                                 | ---                                       | 1.05          | -1.04           | 1.08      | -1.08       | 1.09      | 1.12        | -1.26      | -1.05        | -1.30      | -1.02        | -1.60      | -1.45        |
| ZMAT3                    | zinc finger, matrin-type 3   | chr3q26.32           | transport                                 | ---                                       | 1.16          | 1.11            | 1.15      | 1.06        | -1.15     | -1.07       | -1.42      | -1.25        | -1.39      | -1.23        | -2.30      | -2.33        |
| ZMIZ1                    | zinc finger, MIZ-type conta  | chr10q22.3           | vasculogenesis                            | ---                                       | 1.04          | 1.03            | 1.05      | 1.05        | -1.07     | 1.07        | -1.10      | 1.00         | 1.04       | 1.22         | 1.05       | 1.09         |
| ZMIZ1-AS1                | ZMIZ1 antisense RNA 1        | chr10q22.3           | 0                                         | ---                                       | -1.20         | -1.09           | -1.01     | 1.26        | 1.47      | 1.35        | 1.27       | 1.47         | -1.81      | -1.32        | -2.01      | -1.18        |
| ZMIZ2                    | zinc finger, MIZ-type conta  | chr7p13              | transcription, DNA-dependent              | ---                                       | 1.08          | 1.01            | -1.03     | 1.09        | -1.10     | -1.06       | 1.11       | 1.25         | 1.51       | 1.13         | -1.24      | -1.10        |
| ZMPSTE24                 | zinc metalloproteinase STE   | chr1p34              | proteolysis                               | ---                                       | -1.02         | 1.00            | -1.03     | -1.04       | -1.03     | 1.05        | -1.14      | -1.13        | -1.31      | -1.20        | -1.16      | -1.29        |
| ZMYM2                    | zinc finger, MYM-type 2      | chr13q11-q12         | transcription, DNA-dependent              | ---                                       | -1.02         | -1.07           | -1.10     | -1.02       | -1.24     | 1.05        | -1.13      | -1.04        | -1.27      | -1.02        | -1.24      | -1.40        |
| ZMYM2                    | zinc finger, MYM-type 2      | chr13q11-q12         | transcription, DNA-dependent              | ---                                       | 1.02          | 1.16            | -1.02     | -1.00       | -1.10     | 1.04        | -1.30      | -1.10        | -1.90      | -1.55        | -1.37      | -1.50        |
| ZMYM3                    | zinc finger, MYM-type 3      | chrXq13.1            | cytoskeleton organization                 | ---                                       | -1.04         | -1.04           | 1.02      | 1.01        | -1.06     | -1.07       | -1.05      | -1.05        | -1.29      | -1.15        | -1.37      | -1.23        |
| ZMYM3                    | zinc finger, MYM-type 3      | chrXq13.1            | cytoskeleton organization                 | ---                                       | 1.41          | 1.17            | -1.11     | -1.19       | 1.08      | -1.00       | 1.35       | 1.25         | -1.18      | -1.18        | -1.38      | -1.26        |
| ZMYM3                    | zinc finger, MYM-type 3      | chrXq13.1            | cytoskeleton organization                 | ---                                       | 1.02          | -1.07           | -1.01     | 1.00        | -1.05     | -1.01       | 1.20       | 1.25         | -1.13      | -1.28        | -2.01      | -2.34        |
| ZMYM4                    | zinc finger, MYM-type 4      | chr1p32-p34          | cytoskeleton organization                 | ---                                       | -1.09         | -1.06           | -1.02     | 1.05        | 1.33      | 1.17        | -1.02      | 1.06         | -2.20      | -2.09        | -1.63      | -1.93        |
| ZMYM4                    | zinc finger, MYM-type 4      | chr1p32-p34          | cytoskeleton organization                 | ---                                       | -1.07         | 1.01            | 1.08      | 1.04        | 1.05      | 1.11        | -1.21      | -1.04        | -1.92      | -1.65        | -2.03      | -2.31        |
| ZMYM5                    | zinc finger, MYM-type 5      | chr13q12             | 0                                         | ---                                       | 1.14          | 1.04            | 1.03      | -1.09       | -1.02     | -1.21       | -1.50      | -1.33        | 1.88       | 1.42         | 1.47       | 1.24         |
| ZMYM5                    | zinc finger, MYM-type 5      | chr13q12             | 0                                         | ---                                       | 1.40          | 1.57            | 1.31      | 1.23        | 1.05      | 1.15        | 1.13       | 1.35         | -1.24      | -1.41        | 1.25       | 1.45         |
| ZMYM6                    | zinc finger, MYM-type 6      | chr1p34.2            | cytoskeleton organization                 | ---                                       | -1.85         | -1.20           | 2.02      | 1.81        | 1.54      | -1.12       | 1.09       | -1.03        | 1.22       | 1.12         | 1.84       | 1.62         |
| ZMYM6                    | zinc finger, MYM-type 6      | chr1p34.2            | cytoskeleton organization                 | ---                                       | -1.02         | -1.09           | 1.11      | -1.09       | 1.17      | 1.13        | -1.53      | -1.32        | -1.89      | -1.57        | -1.40      | -1.49        |
| ZMYM6                    | zinc finger, MYM-type 6      | chr1p34.2            | cytoskeleton organization                 | ---                                       | 1.24          | 1.29            | 1.57      | 1.51        | 1.40      | 1.27        | 1.00       | 1.06         | -1.11      | -1.08        | 2.11       | 1.75         |
| ZMYND11                  | zinc finger, MYND-type co    | chr10p14             | negative regulation of transcription from | ---                                       | 1.07          | 1.07            | -1.32     | -1.12       | -1.12     | -1.20       | 1.04       | -1.07        | 2.31       | 1.23         | -1.08      | -2.00        |
| ZMYND11                  | zinc finger, MYND-type co    | chr10p14             | negative regulation of transcription from | ---                                       | -1.06         | -1.03           | 1.03      | 1.02        | 1.07      | 1.00        | -1.01      | 1.01         | -1.27      | -1.13        | -1.49      | -1.52        |
| ZMYND8                   | zinc finger, MYND-type co    | chr20q13.12          | negative regulation of transcription from | ---                                       | 1.07          | 1.03            | 1.06      | -1.00       | 1.10      | 1.08        | 1.25       | 1.04         | 1.48       | 1.28         | 1.51       | 1.68         |
| ZMYND8                   | zinc finger, MYND-type co    | chr20q13.12          | negative regulation of transcription from | ---                                       | 1.17          | 1.09            | 1.15      | 1.10        | 1.12      | 1.07        | 1.08       | -1.19        | 1.11       | 1.06         | 1.72       | 1.45         |
| ZNF10                    | zinc finger protein 10       | chr12q24.33          | transcription, DNA-dependent              | ---                                       | 1.00          | 1.18            | 1.22      | 1.17        | 1.05      | 1.06        | 1.43       | 1.52         | -2.17      | -2.02        | -1.06      | -1.10        |
| ZNF101                   | zinc finger protein 101      | chr19p13.11          | transcription, DNA-dependent              | ---                                       | -1.09         | 1.07            | 1.06      | 1.38        | -1.05     | -1.17       | -1.01      | 1.34         | 2.23       | 1.59         | 1.40       | 1.56         |
| ZNF107                   | zinc finger protein 107      | chr7q11.2            | transcription, DNA-dependent              | ---                                       | 1.22          | 1.12            | 1.05      | 1.01        | -1.03     | 1.15        | -2.01      | -1.51        | -2.49      | -2.66        | -2.10      | -2.28        |
| ZNF12                    | zinc finger protein 12       | chr7p22.1            | transcription, DNA-dependent              | ---                                       | 1.01          | -1.02           | 1.07      | 1.11        | 1.10      | 1.04        | 1.01       | 1.02         | -1.26      | 1.04         | -1.32      | 1.00         |
| ZNF124                   | zinc finger protein 124      | chr1q44              | generation of precursor metabolites and c | ---                                       | 1.23          | -1.02           | 1.59      | 1.30        | 1.29      | -1.00       | -1.46      | -1.28        | -3.66      | -4.24        | -2.06      | -2.26        |
| ZNF133                   | zinc finger protein 133      | chr20p11.23          | transcription, DNA-dependent              | ---                                       | -1.01         | 1.08            | -1.02     | 1.13        | 1.12      | 1.10        | 1.32       | 1.20         | 1.30       | 1.23         | 1.43       | 1.41         |
| ZNF133                   | zinc finger protein 133      | chr20p11.23          | transcription, DNA-dependent              | ---                                       | -1.06         | -1.12           | -1.05     | 1.11        | 1.10      | 1.12        | 1.19       | 1.07         | 1.32       | 1.17         | 1.29       | 1.32         |
| ZNF134                   | zinc finger protein 134      | chr19q13.4           | transcription, DNA-dependent              | ---                                       | -1.09         | -1.32           | 1.07      | 1.24        | 1.13      | 1.03        | 1.29       | 1.21         | 1.65       | 1.38         | 1.73       | 1.70         |
| ZNF136                   | zinc finger protein 136      | chr19p13.2           | negative regulation of transcription from | ---                                       | -1.06         | -1.24           | 1.16      | 1.18        | 1.40      | 1.16        | 1.00       | 1.01         | 1.12       | 1.23         | 1.31       | 1.30         |
| ZNF137P                  | zinc finger protein 137, pse | chr19q13.4           | transcription, DNA-dependent              | ---                                       | 1.35          | 1.75            | -1.21     | -1.30       | 1.61      | 1.09        | -1.28      | -1.27        | -1.78      | -1.94        | 1.63       | 2.01         |
| ZNF14                    | zinc finger protein 14       | chr19p13.11          | transcription, DNA-dependent              | ---                                       | -1.11         | -1.06           | -1.00     | -1.15       | -1.00     | 1.18        | -1.41      | -1.12        | -1.44      | -1.41        | 1.10       | 1.16         |
| ZNF140                   | zinc finger protein 140      | chr12q24.33          | transcription, DNA-dependent              | ---                                       | -1.05         | -1.10           | 1.08      | 1.10        | -1.05     | 1.04        | -1.26      | -1.07        | 1.11       | 1.25         | 1.56       | 1.35         |
| ZNF143                   | zinc finger protein 143      | chr11p15.4           | transcription, DNA-dependent              | ---                                       | 1.12          | 1.09            | 1.18      | 1.17        | -1.26     | 1.15        | -1.07      | -1.00        | 1.22       | 1.42         | 1.52       | 1.47         |
| ZNF148                   | zinc finger protein 148      | chr3q21              | negative regulation of transcription from | ---                                       | -1.06         | -1.21           | 1.06      | -1.09       | 1.06      | 1.24        | -1.30      | -1.18        | -1.08      | 1.23         | -1.12      | 1.11         |
| ZNF160                   | zinc finger protein 160      | chr19q13.42          | transcription, DNA-dependent              | ---                                       | -1.71         | -1.43           | 1.01      | -1.29       | 1.50      | 1.22        | -1.26      | -1.09        | -1.30      | -1.49        | 1.01       | 1.39         |
| ZNF160                   | zinc finger protein 160      | chr19q13.42          | transcription, DNA-dependent              | ---                                       | 1.27          | 1.43            | 1.02      | -1.56       | -1.15     | -1.13       | -1.62      | -1.04        | -1.66      | -1.49        | -1.00      | 1.32         |
| ZNF160                   | zinc finger protein 160      | chr19q13.42          | transcription, DNA-dependent              | ---                                       | -1.38         | 1.09            | 1.12      | 1.78        | -1.41     | -1.32       | 1.10       | 1.37         | 3.56       | 2.49         | -1.22      | -1.05        |
| ZNF165                   | zinc finger protein 165      | chr6p21.3            | transcription, DNA-dependent              | ---                                       | 1.03          | 1.07            | 1.01      | 1.08        | -1.25     | -1.35       | -1.23      | -1.13        | 1.04       | -1.07        | 1.95       | 1.91         |
| ZNF17                    | zinc finger protein 17       | chr19q13.4           | transcription, DNA-dependent              | ---                                       | 1.03          | -1.15           | 1.41      | -1.22       | 1.33      | -1.07       | 1.01       | 1.08         | -2.15      | -1.77        | -1.76      | -1.71        |
| ZNF174                   | zinc finger protein 174      | chr16p13.3           | negative regulation of transcription from | ---                                       | 1.03          | -1.14           | -1.09     | -1.05       | -1.04     | -1.05       | 1.13       | 1.19         | -2.53      | -1.67        | -2.27      | -3.07        |
| ZNF174                   | zinc finger protein 174      | chr16p13.3           | negative regulation of transcription from | ---                                       | -1.10         | 1.00            | 1.11      | -1.05       | 1.12      | -1.05       | -1.24      | -1.16        | -1.10      | -1.21        | -1.21      | 1.04         |
| ZNF174                   | zinc finger protein 174      | chr16p13.3           | negative regulation of transcription from | ---                                       | -1.03         | -1.11           | -1.01     | 1.06        | -1.04     | -1.09       | 1.13       | 1.16         | -1.17      | -1.18        | -1.40      | -1.48        |
| ZNF175                   | zinc finger protein 175      | chr19q13.4           | transcription, DNA-dependent              | ---                                       | 1.27          | 1.16            | -1.06     | -1.15       | -1.11     | 1.05        | -1.03      | -1.06        | -1.32      | -1.24        | 1.01       | -1.09        |
| ZNF175                   | zinc finger protein 175      | chr19q13.4           | transcription, DNA-dependent              | ---                                       | 1.01          | 1.17            | 1.56      | 1.86        | -2.11     | 1.28        | -2.17      | -2.13        | 1.91       | 1.18         | 1.09       | -1.45        |
| ZNF180                   | zinc finger protein 180      | chr19q13.2           | transcription, DNA-dependent              | ---                                       | -1.04         | -1.18           | 1.14      | 1.39        | 1.24      | 1.13        | -1.07      | -1.05        | -1.79      | -1.56        | -1.83      | -1.84        |
| ZNF182                   | zinc finger protein 182      | chrXp11.23           | transcription, DNA-dependent              | ---                                       | 1.08          | 1.04            | 1.05      | 1.12        | 1.04      | 1.16        | -1.20      | -1.12        | 1.12       | 1.14         | 1.28       | 1.46         |
| ZNF182                   | zinc finger protein 182      | chrXp11.23           | transcription, DNA-dependent              | ---                                       | 1.01          | -1.19           | 1.04      | 1.16        | 1.28      | 1.13        | -1.01      | -1.01        | 1.08       | -1.02        | 1.47       | 1.46         |
| ZNF184                   | zinc finger protein 184      | chr6p21.3            | transcription, DNA-dependent              | ---                                       | 1.05          | -1.03           | -1.00     | 1.04        | -1.06     | 1.02        | -1.26      | -1.21        | -1.12      | 1.18         | 1.05       | 1.33         |
| ZNF185                   | zinc finger protein 185 (LIP | chrXq28              | 0                                         | ---                                       | -1.12         | -1.15           | 1.03      | 1.01        | -1.04     | -1.21       | -1.13      | -1.02        | 1.78       | 1.59         | 1.02       | -1.03        |
| ZNF189                   | zinc finger protein 189      | chr9q22-q31          | negative regulation of transcription from | ---                                       | -1.01         | -1.01           | -1.02     | -1.04       | 1.06      | 1.30        | -1.11      | -1.08        | -2.39      | -1.93        | -1.49      | -1.45        |
| ZNF19                    | zinc finger protein 19       | chr16q22             | transcription, DNA-dependent              | ---                                       | -1.10         | 1.02            | 1.27      | 1.47        | 1.24      | 1.10        | 1.08       | 1.10         | -1.71      | -1.97        | -1.16      | 1.12         |
| ZNF197                   | zinc finger protein 197      | chr3p21              | transcription, DNA-dependent              | ---                                       | 1.00          | -1.02           | 1.04      | 1.10        | 1.11      | 1.21        | -1.09      | -1.05        | -1.87      | -1.42        | -1.09      | -1.19        |

| ID                | Gene Title                                          | Chromosomal Location     | 1st Gene Ontology Biological Process      | Pathway | A2497 30 mins | A2497P' 30 mins | A2497 2 h | A2497P' 2 h | A2497 4 h | A2497P' 4 h | A2497 24 h | A2497P' 24 h | A2497 48 h | A2497P' 48 h | A2497 72 h | A2497P' 72 h |
|-------------------|-----------------------------------------------------|--------------------------|-------------------------------------------|---------|---------------|-----------------|-----------|-------------|-----------|-------------|------------|--------------|------------|--------------|------------|--------------|
| ZNF202            | zinc finger protein 202                             | chr11q23.3               | negative regulation of transcription from | ---     | -1.03         | -1.05           | 1.16      | 1.25        | 1.03      | 1.03        | 1.04       | 1.13         | 1.17       | 1.12         | 1.35       | 1.40         |
| ZNF205-AS1        | ZNF205 antisense RNA 1                              | chr16p13.3               | 0                                         | ---     | -1.46         | 1.00            | -1.24     | 1.24        | 1.03      | -1.54       | -1.30      | 1.93         | 1.46       | 1.13         | -6.67      | -2.64        |
| ZNF207            | zinc finger protein 207                             | chr17q11.2               | regulation of transcription, DNA-depend   | ---     | 1.05          | 1.04            | 1.03      | 1.07        | 1.01      | -1.01       | -1.05      | -1.06        | -1.34      | -1.50        | -1.25      | -1.47        |
| ZNF207            | zinc finger protein 207                             | chr17q11.2               | regulation of transcription, DNA-depend   | ---     | -1.01         | -1.00           | 1.02      | 1.05        | 1.02      | -1.02       | -1.13      | -1.16        | -1.28      | -1.42        | -1.19      | -1.40        |
| ZNF207            | zinc finger protein 207                             | chr17q11.2               | regulation of transcription, DNA-depend   | ---     | 1.36          | 1.02            | -1.07     | 1.19        | 1.07      | 1.16        | 1.02       | -1.04        | -2.81      | -1.90        | -2.56      | -2.00        |
| ZNF207            | zinc finger protein 207                             | chr17q11.2               | regulation of transcription, DNA-depend   | ---     | 1.23          | 1.03            | 1.15      | 1.36        | 1.11      | 1.13        | -1.19      | 1.11         | -2.03      | -1.79        | -2.10      | -2.02        |
| ZNF207            | zinc finger protein 207                             | chr17q11.2               | regulation of transcription, DNA-depend   | ---     | 1.51          | -1.06           | 1.01      | -1.32       | 1.07      | 1.23        | -1.23      | 1.15         | -2.54      | -2.12        | -2.34      | -2.89        |
| ZNF207            | zinc finger protein 207                             | chr17q11.2               | regulation of transcription, DNA-depend   | ---     | 1.00          | -1.07           | -1.01     | -1.29       | 1.13      | 1.29        | -1.24      | -1.22        | -2.00      | -1.51        | -1.87      | -1.78        |
| ZNF211            | zinc finger protein 211                             | chr19q13.4               | transcription, DNA-dependent              | ---     | -1.05         | -1.28           | 1.07      | 1.02        | -1.22     | -1.07       | -1.05      | 1.05         | -1.26      | -1.05        | 1.01       | -1.06        |
| ZNF214            | zinc finger protein 214                             | chr11p15.4               | transcription, DNA-dependent              | ---     | -1.24         | -1.18           | -1.16     | 1.11        | 1.17      | 1.09        | -1.57      | -1.18        | -1.27      | -1.66        | -1.83      | -1.59        |
| ZNF214            | zinc finger protein 214                             | chr11p15.4               | transcription, DNA-dependent              | ---     | 1.26          | 1.13            | -1.37     | 1.06        | -1.61     | -1.34       | -1.26      | -1.61        | -4.31      | -2.98        | -2.08      | -2.02        |
| ZNF215            | zinc finger protein 215                             | chr11p15.4               | transcription, DNA-dependent              | ---     | -4.23         | -2.48           | 3.66      | -1.24       | -2.91     | -1.86       | 3.56       | 2.06         | 5.49       | 4.23         | -1.08      | 2.99         |
| ZNF219            | zinc finger protein 219                             | chr14q11                 | regulation of neurotransmitter levels     | ---     | 1.29          | 1.27            | -1.15     | -1.26       | -1.32     | -1.81       | 1.44       | 1.27         | -6.68      | -6.23        | -2.36      | 1.70         |
| ZNF219            | zinc finger protein 219                             | chr14q11                 | regulation of neurotransmitter levels     | ---     | -1.04         | -1.03           | 1.08      | 1.18        | 1.00      | -1.22       | 1.00       | 1.11         | -1.43      | -1.34        | -1.88      | -1.42        |
| ZNF222            | zinc finger protein 222                             | chr10q11                 | transcription, DNA-dependent              | ---     | 1.20          | 1.23            | 1.01      | -1.07       | -1.17     | -1.05       | -1.05      | -1.08        | -1.44      | -1.23        | -1.56      | -1.92        |
| ZNF222            | zinc finger protein 222                             | chr19q13.2               | transcription, DNA-dependent              | ---     | -1.09         | -1.17           | 1.04      | 1.00        | 1.22      | -1.01       | 1.11       | 1.29         | 1.33       | 1.09         | 1.84       | 1.43         |
| ZNF224            | zinc finger protein 224                             | chr19q13.2               | transcription, DNA-dependent              | ---     | 1.44          | -1.17           | 1.18      | 1.14        | -1.01     | 1.09        | -1.49      | -1.22        | -2.63      | -1.50        | -1.95      | -2.77        |
| ZNF226            | zinc finger protein 226                             | chr19q13.2               | transcription, DNA-dependent              | ---     | -1.14         | -1.14           | 1.12      | 1.07        | 1.02      | -1.04       | 1.34       | 1.23         | 1.66       | 1.69         | 1.68       | 2.16         |
| ZNF226            | zinc finger protein 226                             | chr19q13.2               | transcription, DNA-dependent              | ---     | -1.04         | -1.04           | 1.10      | 1.25        | 1.11      | 1.02        | -1.12      | -1.06        | -1.68      | -1.99        | -1.70      | -1.42        |
| ZNF227            | zinc finger protein 227                             | ---                      | transcription, DNA-dependent              | ---     | 1.09          | -1.17           | 1.03      | -1.13       | 1.04      | 1.00        | -1.00      | 1.01         | -1.04      | 1.04         | 1.22       | 1.13         |
| ZNF227            | zinc finger protein 227                             | ---                      | transcription, DNA-dependent              | ---     | 1.34          | 1.25            | 1.05      | -1.05       | -1.02     | -1.11       | -1.00      | -1.06        | 1.04       | 1.02         | 1.42       | 1.06         |
| ZNF229            | zinc finger protein 229                             | chr19q13.31              | transcription, DNA-dependent              | ---     | 1.42          | 1.28            | -1.18     | -1.25       | 1.36      | 1.03        | -1.10      | -1.26        | -1.74      | -1.45        | -1.31      | -1.22        |
| ZNF23             | zinc finger protein 23                              | chr16q22.2               | transcription, DNA-dependent              | ---     | -1.12         | -1.09           | 1.02      | 1.02        | -1.06     | -1.05       | 1.13       | 1.02         | -1.04      | -1.00        | 1.28       | 1.39         |
| ZNF230            | zinc finger protein 230                             | chr19q13.31              | transcription, DNA-dependent              | ---     | -1.06         | -1.02           | 1.16      | 1.08        | -1.06     | 1.07        | 1.25       | 1.04         | -1.25      | -1.12        | 1.14       | 1.22         |
| ZNF232            | zinc finger protein 232                             | chr17p13.2               | transcription, DNA-dependent              | ---     | -1.03         | -1.00           | 1.07      | 1.10        | 1.12      | 1.02        | -1.06      | 1.08         | -1.43      | -1.59        | -1.22      | -1.02        |
| ZNF233            | zinc finger protein 233                             | chr19q13.31              | transcription, DNA-dependent              | ---     | -1.15         | -1.71           | 1.05      | -1.12       | 1.15      | 1.16        | -1.02      | 1.23         | -5.22      | -4.92        | -4.57      | -3.78        |
| ZNF234            | zinc finger protein 234                             | chr19q13.31              | transcription, DNA-dependent              | ---     | 1.15          | -1.17           | -1.25     | -1.56       | -1.27     | 1.36        | 1.15       | 1.19         | -1.50      | -1.44        | -1.70      | -1.87        |
| ZNF235            | zinc finger protein 235                             | chr19q13.2               | transcription, DNA-dependent              | ---     | 1.28          | 1.25            | -1.04     | 1.03        | 1.10      | 1.13        | -1.48      | 1.23         | -5.36      | -4.18        | -3.88      | -2.53        |
| ZNF235            | zinc finger protein 235                             | chr19q13.2               | transcription, DNA-dependent              | ---     | 2.37          | 2.80            | -1.08     | 2.13        | -2.70     | -1.33       | -1.84      | -1.26        | 1.85       | -1.09        | -1.08      | -1.16        |
| ZNF236            | zinc finger protein 236                             | chr18q22-q23             | transcription, DNA-dependent              | ---     | -1.07         | -1.28           | 1.06      | -1.07       | 1.04      | 1.08        | -1.24      | 1.08         | -1.84      | -1.56        | -2.16      | -1.92        |
| ZNF239            | zinc finger protein 239                             | chr10q11.22-q11.23       | transcription, DNA-dependent              | ---     | -1.14         | -1.20           | 1.22      | 1.34        | 1.00      | 1.09        | -1.07      | 1.09         | -2.03      | -1.78        | -1.44      | -1.21        |
| ZNF24             | zinc finger protein 24                              | chr18q12                 | transcription, DNA-dependent              | ---     | -1.13         | 1.17            | 1.16      | 1.01        | 1.26      | 1.18        | 1.83       | 1.51         | 1.83       | 1.40         | 1.96       | 2.06         |
| ZNF248            | zinc finger protein 248                             | chr10p11.2               | transcription, DNA-dependent              | ---     | -1.10         | -1.00           | 1.27      | 1.03        | 1.15      | 1.06        | -1.13      | -1.03        | -1.32      | -1.30        | -1.20      | -1.13        |
| ZNF250            | zinc finger protein 250                             | chr8q24.3                | transcription, DNA-dependent              | ---     | -1.32         | -1.01           | 1.08      | -1.02       | -1.16     | -1.05       | 1.03       | 1.26         | -1.27      | 1.08         | -1.31      | 1.21         |
| ZNF251            | zinc finger protein 251                             | chr8q24.3                | transcription, DNA-dependent              | ---     | 1.18          | 1.03            | -1.13     | 1.11        | 1.14      | 1.13        | 1.09       | 1.04         | 1.47       | 1.30         | 1.55       | 1.90         |
| ZNF252P           | zinc finger protein 252, pseudogene                 | chr8q24.3                | 0                                         | ---     | -1.11         | -1.21           | 1.08      | 1.03        | 1.16      | -1.00       | -1.16      | -1.11        | -1.49      | -1.51        | -1.27      | -1.15        |
| ZNF252P           | zinc finger protein 252, pseudogene                 | chr8q24.3                | 0                                         | ---     | -1.06         | 1.02            | 1.12      | 1.27        | -1.17     | -1.07       | -1.15      | 1.16         | -1.98      | -2.23        | -1.22      | -1.31        |
| ZNF259            | zinc finger protein 259                             | chr11q23.3               | signal transduction                       | ---     | 1.08          | 1.04            | -1.01     | 1.14        | 1.06      | -1.01       | 1.01       | -1.07        | 1.44       | 1.20         | 1.47       | 1.31         |
| ZNF259 /// ZNF259 | zinc finger protein 259 /// zinc finger protein 259 | chr11q23.3 /// chr6p21.3 | signal transduction                       | ---     | 1.03          | 1.06            | 1.04      | 1.04        | 1.19      | 1.02        | -1.02      | -1.19        | 1.47       | 1.24         | 1.73       | 1.76         |
| ZNF260            | zinc finger protein 260                             | chr19q13.12              | transcription, DNA-dependent              | ---     | 1.04          | 1.05            | 1.04      | -1.05       | -1.12     | 1.05        | -1.25      | -1.01        | -1.80      | -1.37        | -1.50      | -1.63        |
| ZNF260            | zinc finger protein 260                             | chr19q13.12              | transcription, DNA-dependent              | ---     | -1.07         | -1.04           | -1.07     | 1.01        | 1.07      | 1.09        | -1.09      | -1.02        | -1.38      | -1.31        | -1.29      | -1.25        |
| ZNF264            | zinc finger protein 264                             | chr19q13.4               | transcription, DNA-dependent              | ---     | 1.05          | 1.13            | 1.13      | -1.13       | 1.05      | -1.12       | 1.07       | 1.15         | -1.37      | -1.31        | 1.32       | 1.29         |
| ZNF268            | zinc finger protein 268                             | chr12q24.33              | transcription, DNA-dependent              | ---     | 1.11          | 1.12            | 1.23      | 1.47        | -1.15     | -1.19       | -1.11      | 1.14         | -2.39      | -2.15        | -2.26      | -1.47        |
| ZNF268            | zinc finger protein 268                             | chr12q24.33              | transcription, DNA-dependent              | ---     | -1.06         | -1.07           | 1.37      | 1.27        | 1.15      | 1.00        | -1.03      | 1.00         | -3.53      | -2.13        | -2.30      | -2.35        |
| ZNF271            | zinc finger protein 271                             | chr18q12                 | transcription, DNA-dependent              | ---     | -1.02         | -1.06           | 1.07      | 1.22        | 1.01      | 1.15        | -1.18      | -1.00        | -1.45      | -1.34        | -1.52      | -1.33        |
| ZNF271            | zinc finger protein 271                             | chr18q12                 | transcription, DNA-dependent              | ---     | 1.12          | 1.03            | -1.19     | -1.17       | -1.14     | 1.13        | -1.31      | -1.12        | -1.78      | -1.60        | -1.94      | -1.90        |
| ZNF274            | zinc finger protein 274                             | chr19qter                | transcription, DNA-dependent              | ---     | -1.08         | -1.15           | 1.07      | 1.28        | 1.13      | 1.04        | -1.07      | 1.04         | 1.22       | 1.10         | 1.40       | 1.53         |
| ZNF275            | zinc finger protein 275                             | chrXq28                  | transcription, DNA-dependent              | ---     | -1.02         | -1.01           | 1.06      | -1.02       | -1.02     | 1.01        | -1.03      | 1.08         | 1.28       | 1.22         | 1.30       | 1.54         |
| ZNF276            | zinc finger protein 276                             | chr16q24.3               | transcription, DNA-dependent              | ---     | 1.05          | 1.02            | 1.02      | 1.28        | 1.11      | -1.05       | 1.03       | 1.03         | -1.07      | -1.58        | -1.95      | -1.23        |
| ZNF276            | zinc finger protein 276                             | chr16q24.3               | transcription, DNA-dependent              | ---     | -1.14         | -1.23           | -1.08     | 1.13        | 1.19      | 1.18        | 1.20       | 1.14         | 1.24       | 1.01         | -1.20      | 1.13         |
| ZNF277            | zinc finger protein 277                             | chr7q31.1                | transcription, DNA-dependent              | ---     | 1.06          | 1.09            | 1.16      | 1.01        | -1.03     | 1.01        | 1.46       | 1.15         | 1.11       | 1.08         | 1.33       | 1.12         |
| ZNF277            | zinc finger protein 277                             | chr7q31.1                | transcription, DNA-dependent              | ---     | -1.02         | 1.00            | -1.00     | -1.06       | -1.04     | 1.04        | 1.17       | 1.03         | -1.28      | -1.08        | 1.26       | 1.18         |
| ZNF280D           | zinc finger protein 280D                            | chr15q21.3               | transcription, DNA-dependent              | ---     | 1.21          | 1.10            | 1.03      | -1.03       | -1.34     | -1.04       | -1.03      | -1.05        | -2.01      | -1.41        | -2.45      | -2.80        |
| ZNF280D           | zinc finger protein 280D                            | chr15q21.3               | transcription, DNA-dependent              | ---     | 1.27          | 1.22            | -1.14     | -1.06       | 1.01      | -1.04       | 1.12       | 1.12         | -2.28      | -2.00        | -1.50      | -1.92        |
| ZNF284            | zinc finger protein 284                             | chr19q13.31              | transcription, DNA-dependent              | ---     | 1.16          | 1.10            | 1.13      | 1.10        | -1.04     | 1.11        | -1.01      | 1.14         | -1.31      | -1.09        | -1.21      | -1.05        |
| ZNF285            | zinc finger protein 285                             | ---                      | transcription, DNA-dependent              | ---     | -1.00         | 1.04            | 1.18      | 1.20        | -1.05     | 1.06        | -1.37      | -1.17        | -1.45      | -1.18        | 1.41       | 1.49         |
| ZNF286A           | zinc finger protein 286A                            | chr17p11.2               | transcription, DNA-dependent              | ---     | -1.06         | 1.05            | 1.09      | -1.15       | 1.03      | 1.03        | 1.21       | 1.13         | 2.10       | 2.22         | 1.55       | 1.37         |
| ZNF287            | zinc finger protein 287                             | chr17p11.2               | transcription, DNA-dependent              | ---     | 2.35          | -1.47           | -2.50     | 1.49        | -3.46     | -2.47       | -1.43      | 1.39         | 8.05       | 4.84         | 1.59       | 1.10         |
| ZNF292            | zinc finger protein 292                             | chr6q14.3                | transcription, DNA-dependent              | ---     | 1.03          | -1.03           | -1.06     | -1.13       | 1.04      | 1.10        | 1.00       | 1.42         | 1.08       | 1.08         | 1.53       | 1.80         |
| ZNF292            | zinc finger protein 292                             | chr6q14.3                | transcription, DNA-dependent              | ---     | 1.25          | 1.24            | -1.07     | -1.25       | -1.15     | -1.05       | -1.09      | 1.01         | -1.41      | -1.14        | 1.24       | 1.19         |
| ZNF296            | zinc finger protein 296                             | chr19q13.32              | transcription, DNA-dependent              | ---     | 1.17          | 1.05            | 1.10      | 1.33        | -1.06     | -1.04       | 1.13       | 1.02         | 1.42       | -1.15        | 1.41       | 1.65         |
| ZNF3              | zinc finger protein 3                               | chr7q22.1                | transcription, DNA-dependent              | ---     | 1.09          | 1.14            | -1.16     | -1.32       | 1.03      | -1.02       | 1.01       | 1.13         | -1.55      | -1.43        | -1.08      | -1.01        |
| ZNF30             | zinc finger protein 30                              | chr19q13.11              | transcription, DNA-dependent              | ---     | 1.13          | -1.09           | 1.29      | 1.06        | 1.20      | 1.02        | -1.95      | -1.44        | -1.49      | -1.53        | -1.32      | -1.38        |
| ZNF300            | zinc finger protein 300                             | chr5q33.1                | transcription, DNA-dependent              | ---     | 1.15          | 1.16            | 1.04      | -1.06       | -1.09     | 1.04        | 1.21       | 1.00         | -1.51      | -1.54        | -1.76      | -2.01        |
| ZNF302            | zinc finger protein 302                             | chr19q13.11              | transcription, DNA-dependent              | ---     | -1.06         | -1.08           | 1.08      | 1.31        | -1.07     | -1.04       | -1.14      | -1.00        | -2.36      | -2.50        | -1.81      | -1.18        |
| ZNF302            | zinc finger protein 302                             | chr19q13.11              | transcription, DNA-dependent              | ---     | -1.20         | -1.20           | 1.10      | 1.06        | -1.19     | 1.07        | -1.08      | 1.05         | -1.71      | -1.54        | -1.27      | -1.02        |

| ID      | Gene Title                          | Chromosomal Location | 1st Gene Ontology Biological Process            | Pathway | A2497 30 mins | A2497P' 30 mins | A2497 2 h | A2497P' 2 h | A2497 4 h | A2497P' 4 h | A2497 24 h | A2497P' 24 h | A2497 48 h | A2497P' 48 h | A2497 72 h | A2497P' 72 h |
|---------|-------------------------------------|----------------------|-------------------------------------------------|---------|---------------|-----------------|-----------|-------------|-----------|-------------|------------|--------------|------------|--------------|------------|--------------|
| ZNF302  | zinc finger protein 302             | chr19q13.11          | transcription, DNA-dependent                    | ---     | 1.08          | 1.00            | 1.10      | 1.18        | 1.03      | 1.11        | -1.13      | -1.10        | -1.55      | -1.56        | -1.36      | -1.27        |
| ZNF311  | zinc finger protein 311             | chr6p22.1            | transcription, DNA-dependent                    | ---     | 1.26          | 1.03            | 1.19      | -1.16       | 1.20      | 1.16        | -1.55      | -1.22        | -1.97      | -1.74        | -1.95      | -1.66        |
| ZNF311  | zinc finger protein 311             | chr6p22.1            | transcription, DNA-dependent                    | ---     | 1.19          | 1.24            | -1.71     | -1.18       | 1.15      | 1.23        | -1.33      | 1.06         | -1.78      | -1.32        | -2.26      | -2.12        |
| ZNF316  | zinc finger protein 316             | chr7p22.1            | transcription, DNA-dependent                    | ---     | -1.19         | -2.81           | -1.00     | -1.23       | 1.85      | 1.73        | -5.06      | -1.68        | 3.59       | 4.67         | 1.13       | 1.68         |
| ZNF317  | zinc finger protein 317             | chr19p13             | transcription, DNA-dependent                    | ---     | -2.10         | -1.91           | -1.00     | -1.12       | -1.53     | -1.50       | 1.58       | 1.61         | 1.60       | 1.87         | 2.18       | 1.94         |
| ZNF317  | zinc finger protein 317             | chr19p13             | transcription, DNA-dependent                    | ---     | 1.06          | 1.13            | 1.00      | 1.07        | 1.10      | 1.01        | 1.07       | -1.06        | 1.10       | -1.01        | 1.22       | 1.28         |
| ZNF318  | zinc finger protein 318             | chr6pter-p12.1       | transcription, DNA-dependent                    | ---     | 1.02          | 1.23            | -1.03     | -1.03       | 1.01      | 1.06        | -1.23      | -1.14        | -2.06      | -1.86        | -1.51      | -1.52        |
| ZNF32   | zinc finger protein 32              | chr10q22-q25         | transcription, DNA-dependent                    | ---     | -1.13         | -1.19           | 1.06      | -1.02       | 1.09      | 1.19        | -1.07      | -1.16        | -1.31      | -1.38        | -1.56      | -1.43        |
| ZNF320  | zinc finger protein 320             | chr19q13.41          | transcription, DNA-dependent                    | ---     | -1.04         | 1.01            | -1.01     | 1.11        | -1.04     | 1.21        | -1.23      | -1.18        | 1.04       | -1.10        | 1.19       | 1.16         |
| ZNF326  | zinc finger protein 326             | chr1p22.2            | transcription, DNA-dependent                    | ---     | 1.05          | 1.06            | -1.07     | 1.00        | 1.01      | 1.10        | -1.14      | 1.13         | -1.99      | -2.10        | -1.28      | -1.80        |
| ZNF326  | zinc finger protein 326             | chr1p22.2            | transcription, DNA-dependent                    | ---     | 1.00          | -1.05           | 1.21      | 1.09        | -1.02     | 1.06        | -1.20      | 1.66         | -2.30      | -2.12        | -1.40      | -1.49        |
| ZNF329  | zinc finger protein 329             | chr19q13.43          | transcription, DNA-dependent                    | ---     | 1.11          | 1.01            | 1.11      | 1.27        | 1.24      | 1.31        | -1.44      | -1.12        | 1.38       | 1.25         | 1.57       | 1.79         |
| ZNF330  | zinc finger protein 330             | chr4q31.21           | 0                                               | ---     | 1.14          | 1.16            | -1.08     | -1.13       | -1.03     | -1.14       | -1.02      | 1.13         | 1.86       | 1.34         | 1.22       | -1.02        |
| ZNF330  | zinc finger protein 330             | chr4q31.21           | 0                                               | ---     | 1.15          | 1.24            | -1.10     | -1.18       | -1.03     | 1.04        | -1.01      | 1.18         | 1.14       | 1.24         | 1.26       | 1.17         |
| ZNF331  | zinc finger protein 331             | chr19q13.42          | transcription, DNA-dependent                    | ---     | -1.03         | -1.03           | 1.03      | 1.01        | 1.11      | 1.03        | 1.60       | 1.23         | 1.55       | 1.66         | 1.72       | 1.95         |
| ZNF333  | zinc finger protein 333             | chr19p13             | transcription, DNA-dependent                    | ---     | 1.21          | -1.12           | 1.07      | 1.16        | 1.10      | -1.07       | -1.41      | -1.01        | 1.59       | 1.55         | -2.02      | -1.35        |
| ZNF334  | zinc finger protein 334             | chr20q13.12          | transcription, DNA-dependent                    | ---     | -2.45         | -2.54           | 1.13      | 3.46        | -1.40     | 1.21        | -1.56      | 1.69         | -1.52      | 1.06         | 1.07       | 1.33         |
| ZNF334  | zinc finger protein 334             | chr20q13.12          | transcription, DNA-dependent                    | ---     | 1.27          | 3.34            | -1.77     | -1.56       | -1.15     | 1.14        | -1.42      | -1.40        | -1.75      | -1.15        | 1.67       | 10.05        |
| ZNF335  | zinc finger protein 335             | chr20q13.12          | positive regulation of neuroblast proliferation | ---     | -1.18         | -1.53           | -1.03     | 1.33        | 1.00      | -1.03       | 1.09       | 1.24         | 1.33       | 1.23         | 1.44       | 1.97         |
| ZNF33A  | zinc finger protein 33A             | chr10p11.2           | transcription, DNA-dependent                    | ---     | 1.09          | -1.08           | -1.01     | 1.01        | -1.05     | 1.01        | 1.13       | 1.14         | -1.07      | -1.07        | 1.11       | 1.35         |
| ZNF33A  | zinc finger protein 33A             | chr10p11.2           | transcription, DNA-dependent                    | ---     | 1.20          | 1.04            | -1.32     | -1.34       | 1.01      | 1.12        | -1.21      | -1.32        | -2.76      | -2.02        | -2.29      | -3.07        |
| ZNF33A  | zinc finger protein 33A             | chr10p11.2           | transcription, DNA-dependent                    | ---     | -1.27         | 1.05            | -1.06     | -1.09       | -1.27     | -1.04       | -1.40      | -1.19        | -1.03      | 1.12         | 1.81       | 1.90         |
| ZNF33B  | zinc finger protein 33B             | chr10q11.2           | transcription, DNA-dependent                    | ---     | 1.15          | 1.14            | 1.10      | 1.05        | 1.07      | 1.02        | 1.34       | 1.18         | -2.18      | -1.68        | -2.53      | -2.30        |
| ZNF33B  | zinc finger protein 33B             | chr10q11.2           | transcription, DNA-dependent                    | ---     | 1.19          | -1.44           | 1.04      | -1.14       | 1.00      | 1.30        | -1.07      | -1.02        | -2.49      | -1.83        | -1.24      | -1.06        |
| ZNF341  | zinc finger protein 341             | chr20q11.22          | transcription, DNA-dependent                    | ---     | -1.14         | 1.05            | 1.36      | 1.25        | 1.19      | 1.09        | 1.55       | 1.44         | 2.15       | 1.53         | 1.63       | 1.81         |
| ZNF341  | zinc finger protein 341             | chr20q11.22          | transcription, DNA-dependent                    | ---     | -1.20         | 1.49            | 1.13      | -1.04       | 1.32      | 1.24        | 1.21       | 1.01         | 2.59       | 1.93         | 1.47       | 1.85         |
| ZNF343  | zinc finger protein 343             | chr20p13             | transcription, DNA-dependent                    | ---     | 1.27          | 1.13            | 1.39      | 1.24        | -1.13     | -1.24       | 1.99       | 1.35         | 1.37       | 1.57         | 1.54       | 2.08         |
| ZNF346  | zinc finger protein 346             | chr5q35.2            | apoptotic process                               | ---     | 1.09          | 1.09            | 1.07      | -1.09       | -1.02     | 1.15        | 1.07       | 1.04         | -1.54      | -1.85        | -1.13      | -1.19        |
| ZNF346  | zinc finger protein 346             | chr5q35.2            | apoptotic process                               | ---     | -1.05         | -1.04           | -1.02     | 1.08        | 1.42      | 1.27        | 1.07       | 1.11         | -1.80      | -2.12        | -1.51      | -1.59        |
| ZNF347  | zinc finger protein 347             | chr19q13.42          | transcription, DNA-dependent                    | ---     | 4.45          | 1.85            | 2.43      | -1.18       | 1.05      | 2.63        | -2.28      | -1.55        | -1.98      | 2.44         | -1.85      | 1.18         |
| ZNF347  | zinc finger protein 347             | chr19q13.42          | transcription, DNA-dependent                    | ---     | 1.18          | 3.77            | -5.41     | -1.35       | -4.57     | -3.04       | -1.00      | -1.55        | 3.52       | 4.41         | -1.04      | -1.93        |
| ZNF35   | zinc finger protein 35              | chr3p21.32           | transcription, DNA-dependent                    | ---     | -1.20         | -1.04           | 1.06      | -1.05       | 1.03      | -1.01       | -1.10      | 1.07         | 1.33       | 1.10         | 1.09       | 1.14         |
| ZNF350  | zinc finger protein 350             | chr19q13.41          | transcription, DNA-dependent                    | ---     | -2.28         | 1.02            | 6.01      | 3.17        | 11.33     | 1.16        | 1.11       | 1.66         | 3.94       | 2.54         | 2.77       | 3.30         |
| ZNF358  | zinc finger protein 358             | chr19p13.2           | transcription, DNA-dependent                    | ---     | 1.04          | 1.08            | 1.21      | 1.40        | -1.31     | -1.21       | 1.38       | 1.55         | 1.01       | -1.12        | -1.57      | -1.33        |
| ZNF362  | zinc finger protein 362             | chr1p35.1            | transcription, DNA-dependent                    | ---     | -1.09         | -1.08           | -1.05     | -1.08       | 1.12      | 1.02        | 1.08       | 1.09         | -1.89      | -1.51        | -2.91      | -2.60        |
| ZNF367  | zinc finger protein 367             | chr9q22q29.22.32     | transcription, DNA-dependent                    | ---     | 1.19          | 1.26            | -1.08     | -1.27       | -1.10     | -1.03       | -1.31      | -1.12        | -1.32      | -1.18        | -1.16      | -1.33        |
| ZNF37A  | zinc finger protein 37A             | chr10p11.2           | transcription, DNA-dependent                    | ---     | 1.19          | 1.06            | 1.11      | -1.03       | 1.09      | 1.07        | -1.14      | -1.07        | -2.01      | -1.81        | -1.49      | -1.69        |
| ZNF37BP | zinc finger protein 37B, pseudogene | chr10q11.21          | 0                                               | ---     | 1.40          | -1.65           | 1.23      | 1.22        | 1.33      | 1.22        | 1.13       | -1.06        | -1.92      | -2.23        | -4.01      | -2.95        |
| ZNF37BP | zinc finger protein 37B, pseudogene | chr10q11.21          | 0                                               | ---     | -1.21         | -1.34           | 1.04      | 1.06        | -1.02     | 1.12        | -1.04      | -1.09        | -5.84      | -3.39        | -2.91      | -3.13        |
| ZNF37BP | zinc finger protein 37B, pseudogene | chr10q11.21          | 0                                               | ---     | 1.04          | -1.10           | -1.10     | 1.30        | 1.05      | 1.20        | 1.14       | 1.30         | -3.45      | -2.85        | -3.76      | -4.41        |
| ZNF382  | zinc finger protein 382             | chr19q13.12          | transcription, DNA-dependent                    | ---     | -3.11         | -4.54           | 2.59      | 1.95        | 1.91      | 2.47        | 4.26       | 1.04         | 10.00      | 8.85         | 4.87       | 3.46         |
| ZNF382  | zinc finger protein 382             | chr19q13.12          | transcription, DNA-dependent                    | ---     | -2.64         | -1.10           | -2.05     | 1.08        | 1.02      | -1.00       | -1.73      | 1.17         | 1.21       | -1.26        | -1.22      | 1.40         |
| ZNF383  | zinc finger protein 383             | chr19q13.12          | transcription, DNA-dependent                    | ---     | -1.02         | -1.05           | -1.14     | -1.09       | 1.07      | 1.00        | 1.57       | 1.35         | 1.07       | -1.06        | 1.62       | 1.55         |
| ZNF384  | zinc finger protein 384             | chr12p12             | transcription, DNA-dependent                    | ---     | 1.05          | 1.10            | 1.01      | -1.03       | 1.15      | 1.09        | 1.07       | -1.02        | 1.13       | 1.14         | 1.13       | 1.14         |
| ZNF385A | zinc finger protein 385A            | chr12q13.13          | transcription, DNA-dependent                    | ---     | 1.12          | 1.09            | -1.12     | 1.01        | 1.04      | -1.05       | -1.02      | 1.09         | 1.55       | 1.50         | 1.08       | -1.03        |
| ZNF385B | zinc finger protein 385B            | chr2q31.2-q31.3      | apoptotic process                               | ---     | -1.26         | 1.17            | 1.07      | 1.29        | -1.14     | -1.09       | 1.28       | 1.63         | -2.99      | -3.29        | -4.28      | -4.20        |
| ZNF394  | zinc finger protein 394             | chr7q22.1            | transcription, DNA-dependent                    | ---     | 1.08          | 1.02            | 1.13      | 1.15        | -1.08     | 1.07        | -1.00      | 1.12         | -1.34      | -1.36        | -2.40      | -1.31        |
| ZNF394  | zinc finger protein 394             | chr7q22.1            | transcription, DNA-dependent                    | ---     | -1.12         | -1.13           | 1.07      | 1.16        | -1.06     | -1.18       | 1.14       | 1.12         | 1.34       | 1.14         | 1.17       | 1.24         |
| ZNF395  | zinc finger protein 395             | chr8p21.1            | transcription, DNA-dependent                    | ---     | -1.14         | -1.11           | 1.04      | 1.17        | 1.01      | -1.08       | 1.50       | 1.11         | 1.32       | 1.39         | 1.26       | 1.26         |
| ZNF396  | zinc finger protein 396             | chr18q12             | transcription, DNA-dependent                    | ---     | -3.98         | -1.29           | 1.11      | 1.57        | 1.42      | 1.33        | -1.06      | 1.56         | 38.51      | 13.31        | 1.21       | -1.04        |
| ZNF397  | zinc finger protein 397             | chr18q12.2           | transcription, DNA-dependent                    | ---     | 1.45          | 1.33            | -1.11     | 1.03        | -1.28     | -1.23       | -1.03      | -1.18        | 1.47       | 1.23         | 1.70       | 1.83         |
| ZNF398  | zinc finger protein 398             | chr7q36.1            | transcription, DNA-dependent                    | ---     | -1.07         | -1.07           | 1.04      | -1.04       | -1.01     | 1.01        | -1.03      | 1.02         | -1.35      | -1.28        | 1.06       | 1.01         |
| ZNF404  | zinc finger protein 404             | chr19q13.31          | transcription, DNA-dependent                    | ---     | -1.95         | 1.62            | 1.18      | -10.04      | -2.90     | -2.52       | -1.05      | -1.32        | 1.61       | -1.78        | 4.63       | 5.80         |
| ZNF407  | zinc finger protein 407             | chr18q23             | transcription, DNA-dependent                    | ---     | 1.02          | 1.00            | 1.05      | -1.00       | 1.07      | 1.07        | -1.10      | -1.01        | -1.50      | -1.37        | -1.23      | -1.29        |
| ZNF408  | zinc finger protein 408             | chr11p11.2           | transcription, DNA-dependent                    | ---     | 1.04          | 1.04            | -1.09     | 1.08        | -1.01     | -1.18       | 1.30       | 1.56         | 1.48       | 1.21         | 1.83       | 1.76         |
| ZNF41   | zinc finger protein 41              | chrXp11.23           | transcription, DNA-dependent                    | ---     | 1.62          | 1.41            | 1.09      | -1.02       | 1.15      | 1.47        | -1.08      | 1.03         | 1.32       | 1.65         | 1.40       | 1.63         |
| ZNF410  | zinc finger protein 410             | chr14q24.3           | transcription, DNA-dependent                    | ---     | -1.05         | 1.00            | -1.03     | -1.10       | 1.11      | 1.08        | -1.04      | 1.27         | 1.14       | 1.03         | 1.03       | -1.00        |
| ZNF410  | zinc finger protein 410             | chr14q24.3           | transcription, DNA-dependent                    | ---     | 1.04          | -1.00           | 1.11      | 1.07        | -1.02     | 1.07        | -1.10      | -1.00        | 1.05       | 1.10         | -1.16      | -1.29        |
| ZNF416  | zinc finger protein 416             | chr19q13.4           | transcription, DNA-dependent                    | ---     | -1.11         | -1.18           | 1.18      | -1.04       | 1.14      | 1.07        | -1.06      | 1.12         | -1.65      | -1.91        | -1.09      | -1.01        |
| ZNF416  | zinc finger protein 416             | chr19q13.4           | transcription, DNA-dependent                    | ---     | -1.41         | -1.25           | 1.15      | 1.06        | 1.06      | -1.03       | -1.13      | -1.16        | -1.95      | -1.79        | -1.28      | -1.24        |
| ZNF418  | zinc finger protein 418             | chr19q13.43          | transcription, DNA-dependent                    | ---     | -1.39         | 1.73            | -1.86     | -1.81       | -1.86     | 1.21        | -2.72      | -7.76        | 1.21       | -1.32        | 1.60       | -1.70        |
| ZNF419  | zinc finger protein 419             | chr19q13.43          | transcription, DNA-dependent                    | ---     | -1.17         | -1.29           | -1.02     | -1.05       | 1.10      | -1.04       | 1.01       | -1.04        | -1.19      | -1.23        | 1.01       | 1.08         |
| ZNF419  | zinc finger protein 419             | chr19q13.43          | transcription, DNA-dependent                    | ---     | -1.20         | -1.23           | 1.07      | 1.11        | 1.06      | 1.00        | -1.02      | 1.07         | -1.05      | -1.13        | 1.34       | 1.42         |
| ZNF420  | zinc finger protein 420             | chr19q13.12          | transcription, DNA-dependent                    | ---     | 1.03          | -1.01           | 1.28      | 1.10        | -1.33     | -1.09       | -1.11      | -1.01        | -1.03      | 1.03         | 1.09       | -1.10        |
| ZNF420  | zinc finger protein 420             | chr19q13.12          | transcription, DNA-dependent                    | ---     | -1.13         | -1.19           | 1.16      | 1.14        | -1.01     | 1.06        | 1.07       | 1.11         | 1.14       | 1.14         | 1.35       | 1.37         |
| ZNF428  | zinc finger protein 428             | chr19q13.31          | 0                                               | ---     | 1.04          | 1.02            | 1.11      | 1.05        | 1.00      | 1.14        | 1.02       | 1.13         | -1.11      | -1.14        | -1.81      | -1.50        |

| ID         | Gene Title               | Chromosomal Location | 1st Gene Ontology Biological Process      | Pathway | A2497 30 mins | A2497P' 30 mins | A2497 2 h | A2497P' 2 h | A2497 4 h | A2497P' 4 h | A2497 24 h | A2497P' 24 h | A2497 48 h | A2497P' 48 h | A2497 72 h | A2497P' 72 h |
|------------|--------------------------|----------------------|-------------------------------------------|---------|---------------|-----------------|-----------|-------------|-----------|-------------|------------|--------------|------------|--------------|------------|--------------|
| ZNF438     | zinc finger protein 438  | chr10p11.23          | transcription, DNA-dependent              | ---     | -1.45         | -1.44           | 1.14      | 1.16        | -1.41     | -1.21       | -1.01      | 1.25         | 2.35       | 1.82         | 1.68       | 1.87         |
| ZNF44      | zinc finger protein 44   | chr19p13.2           | transcription, DNA-dependent              | ---     | 1.03          | -1.71           | -1.17     | 1.81        | 1.70      | 1.45        | 1.72       | 1.24         | -1.31      | -1.40        | 1.65       | 1.44         |
| ZNF440     | zinc finger protein 440  | chr19p13.2           | transcription, DNA-dependent              | ---     | 1.08          | 1.17            | 1.11      | 1.44        | -1.46     | 1.00        | 1.16       | 1.22         | 1.04       | -1.04        | 1.05       | 1.23         |
| ZNF445     | zinc finger protein 445  | chr3p21.32           | transcription, DNA-dependent              | ---     | 1.21          | 1.09            | 1.03      | -1.01       | 1.01      | 1.24        | -1.03      | -1.04        | -2.13      | -2.01        | -1.61      | -1.59        |
| ZNF449     | zinc finger protein 449  | chrXq26.3            | transcription, DNA-dependent              | ---     | -1.30         | -1.49           | 1.03      | 1.11        | 1.28      | 1.59        | -1.53      | -1.18        | -1.14      | -1.09        | 1.36       | 1.82         |
| ZNF451     | zinc finger protein 451  | chr6p12.1            | transcription, DNA-dependent              | ---     | 1.05          | 1.01            | 1.05      | 1.09        | -1.09     | 1.02        | 1.34       | 1.14         | 1.15       | 1.24         | 1.68       | 1.58         |
| ZNF451     | zinc finger protein 451  | chr6p12.1            | transcription, DNA-dependent              | ---     | 1.01          | 1.09            | 1.22      | -1.02       | -1.03     | 1.02        | -1.89      | -1.20        | -2.91      | -2.62        | -1.97      | -2.07        |
| ZNF462     | zinc finger protein 462  | chr9q31.2            | chromatin organization                    | ---     | -2.46         | -2.41           | 1.43      | -1.18       | -5.32     | -1.71       | 2.83       | 1.63         | 1.03       | -1.55        | 1.50       | -1.04        |
| ZNF462     | zinc finger protein 462  | chr9q31.2            | chromatin organization                    | ---     | 1.08          | 1.01            | 1.34      | 1.35        | 1.06      | 1.01        | -1.03      | -1.10        | -1.63      | -1.61        | -1.72      | -1.23        |
| ZNF462     | zinc finger protein 462  | chr9q31.2            | chromatin organization                    | ---     | 1.08          | 1.05            | 1.22      | -1.06       | -1.11     | 1.03        | -1.52      | -1.06        | -1.26      | -1.04        | -1.80      | -1.91        |
| ZNF467     | zinc finger protein 467  | chr7q36.1            | transcription, DNA-dependent              | ---     | -1.06         | -1.03           | -1.35     | -1.08       | -1.07     | -1.07       | 2.06       | 1.57         | 1.24       | 1.72         | 1.13       | 1.56         |
| ZNF467     | zinc finger protein 467  | chr7q36.1            | transcription, DNA-dependent              | ---     | -1.49         | 1.63            | 1.27      | 1.47        | 4.70      | 3.50        | 2.07       | -5.69        | 3.19       | 2.98         | 1.53       | 1.88         |
| ZNF469     | zinc finger protein 469  | chr16q24             | transcription, DNA-dependent              | ---     | -1.25         | -1.31           | 1.06      | 1.23        | 1.33      | 1.08        | 1.12       | -1.11        | -1.62      | -2.42        | -2.81      | -2.77        |
| ZNF473     | zinc finger protein 473  | chr19q13.33          | regulation of transcription, DNA-depend   | ---     | -1.01         | -1.13           | 1.03      | 1.31        | 1.27      | 1.09        | 1.23       | 1.09         | 1.29       | -1.19        | 1.26       | 1.52         |
| ZNF474     | zinc finger protein 474  | chr5q23.2            | 0                                         | ---     | 1.33          | 1.53            | -1.29     | -1.35       | -1.10     | -1.11       | -1.05      | 1.51         | 2.81       | 2.84         | 1.04       | -1.52        |
| ZNF479     | zinc finger protein 479  | chr7p11.2            | transcription, DNA-dependent              | ---     | -1.64         | -1.16           | -1.42     | -1.84       | -18.20    | -1.47       | -2.17      | -5.62        | 4.48       | 14.02        | -2.14      | 1.02         |
| ZNF488     | zinc finger protein 488  | chr10q11.22          | transcription, DNA-dependent              | ---     | 1.23          | 1.04            | -1.04     | -1.28       | -1.17     | 1.05        | 1.51       | 1.44         | -1.01      | -1.21        | -2.02      | -1.76        |
| ZNF490     | zinc finger protein 490  | chr19p13.2           | transcription, DNA-dependent              | ---     | 1.03          | 1.07            | 1.03      | -1.07       | 1.00      | 1.08        | -1.00      | -1.03        | -1.73      | -1.69        | -1.68      | -1.91        |
| ZNF493     | zinc finger protein 493  | chr19p12             | transcription, DNA-dependent              | ---     | 1.04          | -1.21           | -1.13     | -1.24       | -1.50     | -1.29       | -1.09      | 1.52         | -2.16      | -1.63        | -2.98      | -2.98        |
| ZNF496     | zinc finger protein 496  | chr1q44              | negative regulation of transcription from | ---     | -1.18         | -1.25           | -1.10     | 1.16        | -1.08     | -1.05       | 1.44       | 1.24         | -1.16      | 1.25         | -3.19      | -3.59        |
| ZNF497     | zinc finger protein 497  | chr19q13.43          | transcription, DNA-dependent              | ---     | 1.19          | -1.26           | -1.21     | 1.12        | -1.19     | -1.18       | -1.02      | 1.14         | -2.67      | -2.95        | -1.53      | -1.19        |
| ZNF503     | zinc finger protein 503  | chr10q22.2           | transcription, DNA-dependent              | ---     | -1.05         | -1.03           | -1.38     | -1.21       | -1.06     | 1.20        | 1.07       | 1.03         | 2.22       | 1.94         | 2.06       | 2.61         |
| ZNF503     | zinc finger protein 503  | chr10q22.2           | transcription, DNA-dependent              | ---     | 1.09          | -1.02           | 1.12      | 1.05        | -1.07     | 1.01        | 1.00       | 1.10         | 1.33       | 1.62         | 2.05       | 2.24         |
| ZNF503-AS2 | ZNF503 antisense RNA 2   | chr10q22.2           | 0                                         | ---     | 1.20          | 1.16            | 1.41      | 1.34        | 1.03      | 1.12        | -1.00      | 1.13         | -1.14      | -1.01        | -1.07      | 1.45         |
| ZNF503-AS2 | ZNF503 antisense RNA 2   | chr10q22.2           | 0                                         | ---     | 1.10          | -1.06           | 1.45      | 1.05        | -1.12     | -1.11       | 1.02       | 1.10         | 1.16       | -1.11        | -1.05      | 1.24         |
| ZNF503-AS2 | ZNF503 antisense RNA 2   | chr10q22.2           | 0                                         | ---     | 1.49          | -1.24           | 1.23      | 1.18        | -1.18     | -1.42       | -1.08      | 1.32         | 1.44       | 1.05         | 1.42       | 1.71         |
| ZNF507     | zinc finger protein 507  | chr19q13.11          | transcription, DNA-dependent              | ---     | 1.08          | 1.14            | -1.05     | -1.16       | -1.14     | -1.03       | -1.21      | -1.13        | -1.53      | -1.27        | -1.06      | -1.13        |
| ZNF507     | zinc finger protein 507  | chr19q13.11          | transcription, DNA-dependent              | ---     | -1.02         | -1.37           | -1.03     | 1.10        | 1.31      | -1.05       | 1.74       | 1.28         | -1.18      | -1.14        | 1.40       | 1.13         |
| ZNF512     | zinc finger protein 512  | chr2p23              | transcription, DNA-dependent              | ---     | -1.16         | -1.03           | 1.23      | 1.16        | 1.03      | -1.05       | -1.03      | -1.18        | -1.94      | -1.31        | -1.70      | -1.39        |
| ZNF512     | zinc finger protein 512  | chr2p23              | transcription, DNA-dependent              | ---     | 1.13          | 1.03            | 1.05      | 1.28        | -1.12     | -1.06       | -1.17      | -1.12        | -1.20      | -1.20        | -1.99      | -1.56        |
| ZNF512B    | zinc finger protein 512B | chr20q13.33          | transcription, DNA-dependent              | ---     | -1.12         | -1.06           | -1.02     | -1.02       | -1.00     | -1.02       | -1.09      | 1.16         | -1.68      | -1.68        | -2.04      | -1.72        |
| ZNF513     | zinc finger protein 513  | chr2p23.3            | transcription, DNA-dependent              | ---     | 1.02          | 1.17            | -1.20     | 1.33        | -1.09     | -1.27       | 2.59       | 1.85         | 1.14       | -1.13        | 1.19       | -1.03        |
| ZNF514     | zinc finger protein 514  | chr2q11.1            | transcription, DNA-dependent              | ---     | -1.35         | -1.34           | 1.23      | 1.05        | -1.10     | 1.04        | 1.02       | -1.17        | -2.27      | -2.00        | -1.96      | -1.96        |
| ZNF516     | zinc finger protein 516  | chr18q23             | transcription, DNA-dependent              | ---     | 3.62          | 2.39            | -1.83     | -1.27       | -1.90     | -1.15       | -1.17      | 1.01         | -1.21      | 1.04         | -1.13      | -1.15        |
| ZNF518A    | zinc finger protein 518A | chr10q24.1           | transcription, DNA-dependent              | ---     | -1.00         | -1.11           | 1.04      | -1.11       | 1.37      | 1.01        | 1.02       | -1.94        | -2.17      | -1.36        | -1.39      | -1.39        |
| ZNF518A    | zinc finger protein 518A | chr10q24.1           | transcription, DNA-dependent              | ---     | -1.32         | -1.10           | -1.13     | -1.11       | 1.19      | 1.51        | -2.12      | -1.38        | -2.45      | -3.24        | -1.76      | -1.75        |
| ZNF518B    | zinc finger protein 518B | chr4p16.1            | transcription, DNA-dependent              | ---     | 2.24          | 2.77            | -6.78     | -4.47       | -1.01     | 2.59        | -1.25      | 1.13         | 5.80       | 2.87         | 2.63       | 2.09         |
| ZNF519     | zinc finger protein 519  | chr18p11.21          | transcription, DNA-dependent              | ---     | 1.75          | 1.40            | -1.05     | -1.04       | -1.18     | 1.25        | -1.61      | -1.34        | -2.88      | -2.15        | -1.97      | -1.84        |
| ZNF519     | zinc finger protein 519  | chr18p11.21          | transcription, DNA-dependent              | ---     | 1.25          | -1.01           | 1.32      | -1.08       | 1.13      | 1.15        | 1.20       | 1.31         | -1.18      | -1.00        | 1.61       | 1.31         |
| ZNF519     | zinc finger protein 519  | chr18p11.21          | transcription, DNA-dependent              | ---     | 1.06          | 1.09            | 1.12      | 1.05        | 1.16      | 1.22        | 1.50       | 1.43         | -1.11      | -1.05        | 1.28       | 1.26         |
| ZNF527     | zinc finger protein 527  | chr19q13.1           | negative regulation of transcription from | ---     | 1.31          | 1.40            | 1.06      | -1.17       | -1.37     | 1.06        | -1.14      | -1.28        | -3.18      | -3.13        | -1.48      | -3.02        |
| ZNF527     | zinc finger protein 527  | chr19q13.1           | negative regulation of transcription from | ---     | 1.05          | 1.04            | 1.08      | -1.01       | 1.17      | 1.09        | 1.07       | 1.02         | -1.13      | 1.13         | 1.29       | 1.40         |
| ZNF529     | zinc finger protein 529  | chr19q13.13          | transcription, DNA-dependent              | ---     | -1.34         | -1.44           | -1.11     | 1.00        | -1.10     | 1.18        | -1.10      | -1.05        | -2.19      | -1.50        | -2.07      | -2.15        |
| ZNF529     | zinc finger protein 529  | chr19q13.13          | transcription, DNA-dependent              | ---     | -1.00         | -1.53           | -1.53     | -1.33       | 1.11      | 1.11        | -1.32      | 1.10         | 2.30       | 1.39         | 1.88       | 1.74         |
| ZNF532     | zinc finger protein 532  | chr18q21.32          | transcription, DNA-dependent              | ---     | -1.05         | -1.12           | -1.01     | 1.14        | -1.01     | 1.05        | -1.12      | 1.08         | -1.73      | -1.46        | -1.51      | -1.38        |
| ZNF536     | NULL                     | ---                  | 0                                         | ---     | -1.12         | -1.08           | 1.69      | 1.42        | -6.23     | -1.09       | -1.62      | 1.26         | 2.63       | 2.60         | -2.91      | -1.33        |
| ZNF543     | zinc finger protein 543  | chr19q13.43          | transcription, DNA-dependent              | ---     | -1.05         | 1.07            | -1.09     | -1.15       | -1.14     | -1.11       | -1.13      | 1.01         | -1.57      | -1.41        | -1.02      | -1.18        |
| ZNF544     | zinc finger protein 544  | chr19q13.43          | transcription, DNA-dependent              | ---     | -1.17         | -1.21           | 1.07      | 1.02        | 1.19      | 1.04        | 1.04       | 1.08         | -1.45      | -1.53        | -1.32      | -1.17        |
| ZNF546     | zinc finger protein 546  | chr19q13.2           | transcription, DNA-dependent              | ---     | 1.09          | 1.40            | 1.10      | -1.17       | 1.15      | 1.18        | 1.05       | 1.04         | -3.60      | -2.75        | -2.88      | -2.90        |
| ZNF546     | zinc finger protein 546  | chr19q13.2           | transcription, DNA-dependent              | ---     | 1.20          | 1.49            | 1.55      | -1.48       | 1.29      | 1.27        | -1.40      | -1.26        | -2.05      | -2.98        | -2.13      | -2.17        |
| ZNF547     | zinc finger protein 547  | chr19q13.43          | transcription, DNA-dependent              | ---     | -1.14         | -1.31           | 1.52      | 1.97        | 1.08      | 1.35        | -1.91      | -1.19        | -1.28      | -1.50        | -2.86      | -2.87        |
| ZNF548     | zinc finger protein 548  | chr19q13.43          | transcription, DNA-dependent              | ---     | -1.02         | 1.09            | -1.04     | -1.00       | 1.12      | 1.03        | 1.32       | -1.01        | 1.14       | 1.26         | 2.05       | 2.05         |
| ZNF548     | zinc finger protein 548  | chr19q13.43          | transcription, DNA-dependent              | ---     | 1.14          | 1.17            | 1.10      | 1.06        | 1.04      | 1.06        | -1.19      | -1.20        | -1.87      | -1.44        | -1.48      | -1.48        |
| ZNF548     | zinc finger protein 548  | chr19q13.43          | transcription, DNA-dependent              | ---     | 1.10          | 1.05            | 1.29      | 1.34        | 1.02      | -1.07       | -1.04      | 1.08         | -1.33      | -1.29        | -1.22      | -1.15        |
| ZNF550     | zinc finger protein 550  | chr19q13.43          | transcription, DNA-dependent              | ---     | 1.19          | 1.09            | 1.07      | -1.01       | 1.11      | 1.16        | -1.17      | -1.13        | -1.16      | -1.01        | 1.45       | 1.34         |
| ZNF550     | zinc finger protein 550  | chr19q13.43          | transcription, DNA-dependent              | ---     | 1.66          | -1.36           | -1.45     | -1.26       | 1.46      | 1.08        | 2.29       | 1.49         | -1.34      | 1.04         | 2.32       | 2.08         |
| ZNF552     | zinc finger protein 552  | chr19q13.43          | transcription, DNA-dependent              | ---     | -1.06         | -1.06           | 1.16      | -1.01       | -1.03     | 1.03        | -1.12      | -1.03        | -1.56      | -1.49        | -1.48      | -1.63        |
| ZNF555     | zinc finger protein 555  | chr19p13.3           | transcription, DNA-dependent              | ---     | 1.21          | -1.05           | 1.26      | 1.32        | -1.05     | -1.05       | 1.42       | 1.17         | 1.18       | 1.05         | 1.49       | 1.55         |
| ZNF556     | zinc finger protein 556  | chr19p13.3           | transcription, DNA-dependent              | ---     | -1.40         | -1.77           | -1.06     | -1.61       | 1.21      | 1.65        | -1.80      | -2.59        | 1.57       | 1.81         | 1.66       | 1.55         |
| ZNF559     | zinc finger protein 559  | chr19p13.2           | transcription, DNA-dependent              | ---     | 1.07          | -1.09           | 1.16      | 1.10        | 1.05      | -1.04       | -1.14      | -1.03        | -1.14      | -1.16        | 1.15       | 1.40         |
| ZNF562     | zinc finger protein 562  | chr19p13.2           | transcription, DNA-dependent              | ---     | -1.02         | -1.08           | -1.12     | -1.09       | -1.04     | -1.02       | -1.09      | -1.02        | 1.06       | 1.11         | 1.29       | 1.29         |
| ZNF567     | zinc finger protein 567  | chr19q13.12          | transcription, DNA-dependent              | ---     | 1.05          | -1.11           | -1.01     | -1.11       | -1.50     | 1.02        | 1.42       | -1.08        | 1.05       | 1.62         | 1.68       | 1.80         |
| ZNF567     | zinc finger protein 567  | chr19q13.12          | transcription, DNA-dependent              | ---     | 1.39          | -1.11           | 2.15      | 1.75        | -1.20     | -1.66       | -1.42      | -1.07        | 1.75       | 3.45         | 1.46       | 1.76         |
| ZNF57      | zinc finger protein 57   | chr19p13.3           | transcription, DNA-dependent              | ---     | -1.04         | -1.05           | 1.08      | 1.15        | -1.01     | -1.03       | 1.10       | 1.01         | 1.39       | 1.23         | 1.56       | 1.62         |
| ZNF570     | zinc finger protein 570  | chr19q13.12          | transcription, DNA-dependent              | ---     | 1.59          | -1.16           | 1.54      | 3.34        | 1.26      | -2.93       | -1.39      | 1.58         | -2.99      | -2.80        | 1.86       | 5.09         |
| ZNF571     | zinc finger protein 571  | chr19q13.12          | transcription, DNA-dependent              | ---     | -1.32         | -1.10           | -1.29     | -1.14       | 1.28      | 1.33        | -1.52      | -1.06        | -1.18      | -1.25        | 1.72       | 1.51         |

| ID           | Gene Title                    | Chromosomal Location | 1st Gene Ontology Biological Process       | Pathway | A2497 30 mins | A2497P' 30 mins | A2497 2 h | A2497P' 2 h | A2497 4 h | A2497P' 4 h | A2497 24 h | A2497P' 24 h | A2497 48 h | A2497P' 48 h | A2497 72 h | A2497P' 72 h |
|--------------|-------------------------------|----------------------|--------------------------------------------|---------|---------------|-----------------|-----------|-------------|-----------|-------------|------------|--------------|------------|--------------|------------|--------------|
| ZNF571-AS1   | ZNF571 antisense RNA 1        | ---                  | 0                                          | ---     | -5.52         | -1.20           | -1.76     | 3.03        | -3.66     | 1.10        | -4.47      | -3.40        | 6.24       | 2.35         | 1.47       | -1.11        |
| ZNF572       | zinc finger protein 572       | chr8q24.13           | transcription, DNA-dependent               | ---     | 1.45          | 1.53            | 1.43      | 1.05        | -1.07     | -1.00       | -1.56      | 1.07         | -3.32      | -2.58        | -4.03      | -3.15        |
| ZNF573       | zinc finger protein 573       | chr19q13.12          | transcription, DNA-dependent               | ---     | 1.05          | -1.32           | 1.18      | 1.34        | 1.18      | 1.33        | -1.12      | -1.10        | -1.58      | -1.48        | -1.57      | -1.29        |
| ZNF576       | zinc finger protein 576       | chr19q13.31          | transcription, DNA-dependent               | ---     | 1.05          | -1.07           | -1.10     | -1.04       | 1.02      | -1.13       | 1.02       | 1.04         | -1.41      | -1.20        | -1.58      | -1.47        |
| ZNF578       | zinc finger protein 578       | chr19q13.41          | transcription, DNA-dependent               | ---     | 1.40          | -1.10           | -1.14     | 1.42        | 1.48      | 1.93        | -1.24      | 1.88         | 1.45       | 1.49         | 1.67       | 2.80         |
| ZNF578       | zinc finger protein 578       | chr19q13.41          | transcription, DNA-dependent               | ---     | 2.87          | 2.63            | 2.50      | 5.30        | 6.45      | -1.62       | -5.48      | 2.12         | -1.40      | 1.35         | 5.02       | 1.60         |
| ZNF580       | zinc finger protein 580       | chr19q13.42          | transcription, DNA-dependent               | ---     | 1.13          | 1.09            | -1.02     | 1.07        | -1.04     | -1.05       | 1.21       | 1.19         | 1.05       | 1.02         | -1.34      | -1.28        |
| ZNF581       | zinc finger protein 581       | chr19q13.42          | transcription, DNA-dependent               | ---     | 1.03          | 1.02            | 1.01      | 1.10        | 1.00      | -1.06       | 1.93       | 1.45         | 1.49       | 1.16         | 1.34       | 1.44         |
| ZNF584       | zinc finger protein 584       | chr19q13.43          | transcription, DNA-dependent               | ---     | -1.16         | -1.27           | -1.05     | -1.03       | -1.01     | -1.05       | 1.14       | 1.12         | 1.02       | -1.08        | 1.12       | 1.31         |
| ZNF585A      | zinc finger protein 585A      | chr19q13.12          | transcription, DNA-dependent               | ---     | -1.22         | -1.69           | 1.49      | 1.28        | 1.04      | 1.57        | -1.38      | -1.25        | -1.24      | -1.15        | 1.92       | 2.54         |
| ZNF585A      | zinc finger protein 585A      | chr19q13.12          | transcription, DNA-dependent               | ---     | 1.12          | 1.21            | 1.23      | 1.08        | 1.03      | 1.33        | -1.67      | -1.29        | 1.15       | 1.09         | 1.36       | 1.62         |
| ZNF585A      | zinc finger protein 585A      | chr19q13.12          | transcription, DNA-dependent               | ---     | -1.07         | -1.02           | -1.19     | -1.08       | 1.02      | 1.03        | -1.08      | -1.16        | 1.19       | 1.00         | 1.38       | 1.39         |
| ZNF587B      | zinc finger protein 587B      | ---                  | regulation of transcription, DNA-depend    | ---     | -1.10         | -1.16           | -1.10     | -1.09       | -1.14     | 1.18        | -1.61      | -1.29        | -1.84      | -1.56        | -1.54      | -1.66        |
| ZNF589       | zinc finger protein 589       | chr3p21              | regulation of transcription, DNA-depend    | ---     | 1.20          | 1.20            | 1.02      | 1.14        | -1.10     | -1.01       | -1.09      | -1.45        | -1.49      | -1.90        | -1.26      | -1.59        |
| ZNF589       | zinc finger protein 589       | chr3p21              | regulation of transcription, DNA-depend    | ---     | 1.28          | 1.14            | 1.08      | 1.16        | -1.03     | 1.01        | 1.05       | 1.13         | -1.44      | -1.55        | -1.43      | -1.47        |
| ZNF589       | zinc finger protein 589       | chr3p21              | regulation of transcription, DNA-depend    | ---     | 1.21          | -1.28           | -1.54     | -1.05       | -1.12     | 1.12        | -1.50      | 1.42         | -2.42      | -1.88        | -2.13      | -1.55        |
| ZNF592       | zinc finger protein 592       | chr15q25.3           | transcription, DNA-dependent               | ---     | -1.02         | -1.03           | 1.04      | 1.07        | -1.16     | -1.04       | 1.06       | 1.03         | -1.19      | -1.35        | -1.30      | -1.10        |
| ZNF593       | zinc finger protein 593       | chr1p36.11           | negative regulation of transcription from  | ---     | -1.00         | -1.09           | -1.05     | -1.03       | 1.02      | -1.02       | 1.04       | -1.09        | 1.28       | 1.11         | 1.40       | 1.41         |
| ZNF594       | zinc finger protein 594       | chr17p13             | transcription, DNA-dependent               | ---     | 1.12          | -1.07           | 1.30      | -1.03       | -1.03     | 1.21        | -1.35      | -1.04        | -6.77      | -4.81        | -5.36      | -4.07        |
| ZNF595       | zinc finger protein 595       | chr4p16.3            | transcription, DNA-dependent               | ---     | -1.36         | -1.75           | 1.42      | 2.20        | -1.10     | -1.16       | -2.23      | 1.03         | -1.61      | -1.50        | -4.22      | -1.48        |
| ZNF598       | zinc finger protein 598       | chr16p13.3           | regulation of transcription, DNA-depend    | ---     | 1.07          | -1.05           | 1.02      | 1.25        | -1.22     | -1.24       | -1.02      | 1.07         | 1.26       | 1.10         | 1.12       | 1.35         |
| ZNF599       | zinc finger protein 599       | chr19q13.11          | transcription, DNA-dependent               | ---     | 1.17          | -1.10           | 1.13      | 1.26        | -1.18     | 1.38        | -1.40      | -1.61        | -2.04      | -2.10        | -2.54      | -2.76        |
| ZNF599       | zinc finger protein 599       | chr19q13.11          | transcription, DNA-dependent               | ---     | -1.03         | -1.06           | 1.08      | 1.32        | -1.17     | -1.06       | -1.34      | -1.27        | -1.30      | -1.43        | -1.63      | -1.71        |
| ZNF599       | zinc finger protein 599       | chr19q13.11          | transcription, DNA-dependent               | ---     | 1.35          | 1.43            | -1.32     | 1.55        | 1.17      | 1.07        | -1.54      | -2.04        | -1.43      | -2.01        | -1.68      | -1.40        |
| ZNF606       | zinc finger protein 606       | chr19q13.4           | transcription, DNA-dependent               | ---     | -1.33         | -1.53           | 1.35      | 2.47        | -1.16     | -2.20       | -1.52      | 1.02         | -2.06      | -1.41        | -2.16      | -1.79        |
| ZNF607       | zinc finger protein 607       | chr19q13.1           | transcription, DNA-dependent               | ---     | 1.20          | -1.17           | 1.06      | 1.18        | -1.18     | -1.20       | -1.07      | 1.02         | -1.15      | -1.21        | 1.15       | 1.32         |
| ZNF609       | zinc finger protein 609       | chr15q22.31          | 0                                          | ---     | 1.00          | 1.15            | 1.10      | -1.23       | -1.38     | -1.04       | -1.07      | -1.09        | 1.33       | 1.44         | 1.37       | 1.11         |
| ZNF611       | zinc finger protein 611       | chr19q13.41          | transcription, DNA-dependent               | ---     | 1.22          | 1.37            | -1.04     | 1.01        | 1.04      | 1.39        | -1.48      | -1.28        | -2.28      | -3.12        | -2.81      | -2.52        |
| ZNF611       | zinc finger protein 611       | chr19q13.41          | transcription, DNA-dependent               | ---     | 1.05          | 1.12            | -1.12     | -1.13       | -1.12     | 1.06        | -1.06      | -1.04        | -1.02      | 1.07         | -1.49      | -1.56        |
| ZNF614       | zinc finger protein 614       | chr19q13.41          | transcription, DNA-dependent               | ---     | -1.03         | -1.04           | -1.03     | 1.22        | 1.30      | 1.35        | 1.15       | -1.04        | 1.51       | 1.53         | 2.12       | 1.77         |
| ZNF615       | zinc finger protein 615       | chr19q13.41          | transcription, DNA-dependent               | ---     | 1.13          | 1.07            | -1.10     | -1.09       | 1.10      | 1.32        | -1.18      | -1.07        | -2.09      | -1.52        | 1.07       | -1.12        |
| ZNF616       | zinc finger protein 616       | chr19q13.41          | transcription, DNA-dependent               | ---     | 1.11          | -1.32           | -1.09     | -1.06       | -1.16     | -1.21       | -1.02      | -1.02        | -1.46      | 1.11         | -1.06      | 1.38         |
| ZNF616       | zinc finger protein 616       | chr19q13.41          | transcription, DNA-dependent               | ---     | -1.05         | -1.25           | 1.01      | 1.14        | 1.11      | 1.16        | -1.45      | 1.04         | 1.06       | 1.06         | 1.36       | 1.51         |
| ZNF618       | zinc finger protein 618       | chr9q32              | transcription, DNA-dependent               | ---     | -1.13         | -1.13           | 1.25      | -1.02       | 1.14      | 1.05        | -1.00      | 1.08         | -1.31      | -1.63        | -1.69      | -1.43        |
| ZNF618       | zinc finger protein 618       | chr9q32              | transcription, DNA-dependent               | ---     | 1.20          | 1.06            | 1.00      | 1.04        | 1.34      | -1.00       | -1.22      | -1.16        | -1.81      | -1.40        | -1.73      | -1.71        |
| ZNF618       | zinc finger protein 618       | chr9q32              | transcription, DNA-dependent               | ---     | 1.01          | -1.03           | 1.03      | -1.24       | 1.26      | 1.08        | -1.02      | -1.04        | -1.88      | -1.57        | -1.79      | -1.75        |
| ZNF620       | zinc finger protein 620       | chr3p22.1            | transcription, DNA-dependent               | ---     | -1.12         | -1.44           | -1.44     | 1.07        | -1.22     | 1.02        | -1.27      | 1.26         | -1.32      | -1.51        | -1.87      | -1.74        |
| ZNF621       | zinc finger protein 621       | chr3p22.1            | transcription, DNA-dependent               | ---     | -1.00         | -1.09           | 1.10      | 1.16        | 1.15      | 1.09        | 1.08       | 1.01         | -1.59      | -1.72        | -1.19      | -1.10        |
| ZNF621       | zinc finger protein 621       | chr3p22.1            | transcription, DNA-dependent               | ---     | 1.05          | -1.02           | 1.14      | 1.06        | 1.16      | 1.20        | -1.03      | 1.01         | -1.83      | -1.70        | -1.32      | -1.58        |
| ZNF621       | zinc finger protein 621       | chr3p22.1            | transcription, DNA-dependent               | ---     | -1.08         | 1.29            | 1.29      | 1.73        | 1.20      | 1.18        | 1.23       | 1.26         | -1.74      | -1.35        | -1.13      | -1.02        |
| ZNF622       | zinc finger protein 622       | chr5p15.1            | intrinsic apoptotic signaling pathway in r | ---     | -1.08         | -1.02           | 1.06      | 1.03        | 1.10      | -1.02       | 1.25       | 1.12         | 1.67       | 1.24         | 1.15       | 1.20         |
| ZNF623       | zinc finger protein 623       | chr8q24.3            | transcription, DNA-dependent               | ---     | 1.05          | 1.07            | 1.06      | -1.42       | -1.14     | -1.05       | -1.18      | -1.11        | -2.04      | -1.87        | -1.28      | -1.69        |
| ZNF625 /// Z | zinc finger protein 625 /// Z | chr19p /// chr19p13  | transcription, DNA-dependent               | ---     | 1.09          | -1.28           | 1.21      | 1.15        | -1.12     | 1.24        | 1.46       | -1.17        | 1.25       | -1.51        | 1.07       | -1.58        |
| ZNF627       | zinc finger protein 627       | chr19p13.2           | transcription, DNA-dependent               | ---     | 1.13          | 1.18            | 1.23      | 1.07        | 1.01      | 1.13        | -1.04      | 1.05         | -1.26      | -1.11        | 1.32       | 1.09         |
| ZNF628       | zinc finger protein 628       | chr19q13.42          | transcription, DNA-dependent               | ---     | 1.07          | 1.08            | 1.06      | 1.15        | -1.04     | -1.03       | 1.32       | 1.17         | 1.14       | 1.33         | 1.28       | 1.18         |
| ZNF629       | zinc finger protein 629       | chr16p11.2           | transcription, DNA-dependent               | ---     | -1.03         | -1.03           | 1.03      | 1.11        | -1.04     | -1.07       | 1.03       | 1.11         | -1.26      | -1.40        | -1.46      | -1.21        |
| ZNF630       | zinc finger protein 630       | chrXp11.3-p11.1      | transcription, DNA-dependent               | ---     | 1.05          | -1.05           | -1.51     | -1.12       | -1.14     | -1.60       | 1.15       | -1.26        | -1.04      | -1.25        | 1.48       | 1.70         |
| ZNF638       | zinc finger protein 638       | chr2p13.1            | transcription, DNA-dependent               | ---     | 1.05          | 1.09            | 1.05      | -1.00       | -1.05     | 1.05        | -1.19      | -1.01        | -1.69      | -1.71        | -1.24      | -1.38        |
| ZNF638       | zinc finger protein 638       | chr2p13.1            | transcription, DNA-dependent               | ---     | -1.03         | -1.15           | 1.15      | 1.47        | -1.24     | -1.24       | -1.33      | -1.20        | 1.75       | 1.21         | 1.34       | 1.24         |
| ZNF638 /// Z | zinc finger protein 638 /// Z | chr2p13.1            | transcription, DNA-dependent               | ---     | 1.04          | 1.09            | 1.01      | 1.02        | 1.00      | 1.01        | -1.13      | 1.08         | -1.61      | -1.54        | -1.21      | -1.30        |
| ZNF638 /// Z | zinc finger protein 638 /// Z | chr2p13.1            | transcription, DNA-dependent               | ---     | -1.06         | -1.01           | 1.10      | -1.04       | 1.19      | 1.21        | -1.37      | -1.05        | -1.71      | -1.48        | -1.22      | -1.24        |
| ZNF639       | zinc finger protein 639       | chr3q26.33           | transcription, DNA-dependent               | ---     | 1.07          | 1.00            | 1.04      | 1.15        | -1.08     | 1.05        | -1.09      | -1.02        | -1.11      | -1.11        | -1.22      | -1.19        |
| ZNF641       | zinc finger protein 641       | chr12q13.11          | transcription, DNA-dependent               | ---     | 1.44          | 1.49            | 1.27      | -1.42       | -1.21     | -1.15       | -1.11      | 1.20         | 1.71       | 1.66         | -2.02      | -1.95        |
| ZNF652       | zinc finger protein 652       | chr17q21.32          | transcription, DNA-dependent               | ---     | -1.02         | 1.11            | 1.10      | 1.02        | 1.24      | 1.18        | -1.19      | -1.14        | -1.60      | -1.27        | -1.47      | -1.54        |
| ZNF652       | zinc finger protein 652       | chr17q21.32          | transcription, DNA-dependent               | ---     | -1.07         | -1.09           | -1.02     | -1.24       | 1.11      | 1.25        | -1.44      | -1.33        | -1.68      | -1.25        | -1.55      | -1.49        |
| ZNF652       | zinc finger protein 652       | chr17q21.32          | transcription, DNA-dependent               | ---     | 1.28          | 1.17            | -1.03     | -1.07       | -1.13     | 1.08        | -1.69      | -1.12        | -1.83      | -1.50        | -1.56      | -1.58        |
| ZNF654       | zinc finger protein 654       | chr3p11.1            | transcription, DNA-dependent               | ---     | 1.01          | 1.17            | 1.10      | -1.10       | 1.02      | 1.10        | 1.02       | 1.03         | -1.24      | -1.05        | 1.46       | 1.21         |
| ZNF655       | zinc finger protein 655       | chr7q22.1            | transcription, DNA-dependent               | ---     | 1.02          | 1.09            | -1.12     | -1.16       | 1.12      | 1.06        | 1.06       | -1.05        | -1.26      | 1.06         | -2.41      | -2.01        |
| ZNF655       | zinc finger protein 655       | chr7q22.1            | transcription, DNA-dependent               | ---     | -1.07         | -1.16           | 1.10      | 1.21        | -1.07     | -1.01       | -1.00      | 1.02         | -1.54      | -1.27        | -1.44      | -1.57        |
| ZNF662       | zinc finger protein 662       | chr3p22.1            | transcription, DNA-dependent               | ---     | 1.00          | -1.31           | 1.15      | 1.32        | -1.12     | -1.18       | -1.40      | 1.02         | -4.54      | -3.64        | -5.58      | -3.96        |
| ZNF664       | zinc finger protein 664       | chr12q24.31          | transcription, DNA-dependent               | ---     | 1.08          | 1.09            | 1.03      | 1.00        | -1.02     | -1.00       | -1.12      | -1.13        | -1.51      | -1.30        | -1.53      | -1.59        |
| ZNF668       | zinc finger protein 668       | chr16p11.2           | transcription, DNA-dependent               | ---     | -1.01         | 1.01            | -1.04     | 1.16        | 1.26      | -1.11       | 1.14       | 1.04         | 1.57       | 1.29         | 1.08       | 1.06         |
| ZNF670       | zinc finger protein 670       | chr1q44              | transcription, DNA-dependent               | ---     | -1.06         | 1.07            | -1.21     | -1.12       | 1.14      | 1.45        | -1.13      | -1.19        | -1.31      | -1.47        | 1.64       | 1.15         |
| ZNF674       | zinc finger protein 674       | chrXp11.3            | transcription, DNA-dependent               | ---     | 2.21          | 7.30            | 5.76      | 2.21        | 2.05      | 7.11        | 3.85       | 1.02         | 1.15       | -1.26        | 2.10       |              |
| ZNF674-AS1   | ZNF674 antisense RNA 1        | chrXp11.23           | 0                                          | ---     | 1.23          | 1.32            | 1.06      | 1.04        | 1.07      | 1.06        | 1.10       | -1.13        | -1.26      | -1.42        | -1.54      | -1.73        |
| ZNF675       | zinc finger protein 675       | chr19p12             | negative regulation of transcription from  | ---     | 1.12          | 1.01            | -1.06     | 1.01        | 1.03      | 1.16        | -1.56      | 1.03         | -1.83      | -1.71        | -1.69      | -1.27        |

| ID      | Gene Title                | Chromosomal Location | 1st Gene Ontology Biological Process    | Pathway | A2497 30 mins | A2497P' 30 mins | A2497 2 h | A2497P' 2 h | A2497 4 h | A2497P' 4 h | A2497 24 h | A2497P' 24 h | A2497 48 h | A2497P' 48 h | A2497 72 h | A2497P' 72 h |
|---------|---------------------------|----------------------|-----------------------------------------|---------|---------------|-----------------|-----------|-------------|-----------|-------------|------------|--------------|------------|--------------|------------|--------------|
| ZNF678  | zinc finger protein 678   | chr1q42.13           | transcription, DNA-dependent            | ---     | -1.08         | -1.21           | -1.01     | -1.22       | 3.24      | -1.22       | 4.31       | 1.40         | 7.84       | 10.07        | 1.30       | 2.64         |
| ZNF684  | zinc finger protein 684   | chr1p34.2            | transcription, DNA-dependent            | ---     | -1.19         | -1.51           | 1.23      | 1.00        | -1.16     | 1.13        | -1.39      | -1.07        | -1.21      | -1.83        | 1.23       | 1.03         |
| ZNF688  | zinc finger protein 688   | chr16p11.2           | transcription, DNA-dependent            | ---     | -2.29         | -1.70           | 4.58      | 5.53        | -3.27     | -1.28       | 2.01       | 3.36         | 1.49       | -1.06        | -1.29      | -1.65        |
| ZNF688  | zinc finger protein 688   | chr16p11.2           | transcription, DNA-dependent            | ---     | 1.11          | 1.04            | -1.18     | 1.17        | 1.16      | 1.04        | 1.43       | 1.18         | -1.17      | -1.51        | -2.16      | -1.80        |
| ZNF688  | zinc finger protein 688   | chr16p11.2           | transcription, DNA-dependent            | ---     | -1.08         | 1.02            | -1.01     | -1.03       | -1.16     | -1.05       | 1.45       | 1.13         | -1.56      | -1.61        | -2.46      | -1.94        |
| ZNF689  | zinc finger protein 689   | chr16p11.2           | transcription, DNA-dependent            | ---     | -1.08         | -1.03           | 1.04      | -1.00       | 1.02      | -1.05       | -1.09      | -1.04        | -1.23      | -1.32        | 1.18       | 1.30         |
| ZNF689  | zinc finger protein 689   | chr16p11.2           | transcription, DNA-dependent            | ---     | -1.14         | -1.16           | 1.06      | -1.16       | 1.07      | 1.06        | -1.18      | -1.18        | -1.29      | -1.30        | 1.06       | 1.02         |
| ZNF696  | zinc finger protein 696   | chr8q24.3            | transcription, DNA-dependent            | ---     | 1.04          | -1.03           | 1.36      | 1.13        | 1.12      | 1.29        | -1.33      | 1.14         | -1.29      | -1.61        | -1.29      | -1.63        |
| ZNF7    | zinc finger protein 7     | chr8q24              | transcription, DNA-dependent            | ---     | -1.03         | -1.13           | 1.04      | 1.10        | 1.17      | 1.07        | 1.22       | 1.19         | 1.45       | 1.43         | 1.64       | 1.88         |
| ZNF70   | zinc finger protein 70    | chr22q11.23          | transcription, DNA-dependent            | ---     | -1.12         | -1.02           | -1.09     | -1.11       | 1.24      | 1.27        | -1.06      | -1.11        | -2.15      | -2.24        | -1.18      | -1.52        |
| ZNF703  | zinc finger protein 703   | chr8p11.23           | transcription, DNA-dependent            | ---     | -1.01         | -1.02           | 1.14      | 1.07        | -1.13     | -1.00       | -1.14      | -1.04        | -1.61      | -1.76        | -1.04      | -1.35        |
| ZNF704  | zinc finger protein 704   | chr8q21.13           | 0                                       | ---     | 1.04          | 1.15            | 1.58      | 1.27        | -1.16     | 1.16        | 1.33       | 1.54         | -1.46      | -1.97        | -1.63      | -1.84        |
| ZNF706  | zinc finger protein 706   | chr8q22.3            | 0                                       | ---     | 1.02          | -1.09           | 1.06      | -1.07       | -1.16     | -1.06       | -1.47      | -1.20        | -1.63      | -1.62        | -2.02      | -1.69        |
| ZNF708  | zinc finger protein 708   | chr19p12             | transcription, DNA-dependent            | ---     | 1.37          | 1.13            | 1.22      | 1.07        | -1.17     | 1.05        | -1.12      | -1.29        | -1.99      | -1.81        | -2.80      | -2.48        |
| ZNF709  | zinc finger protein 709   | chr19p13.2           | transcription, DNA-dependent            | ---     | 1.14          | 1.05            | 1.17      | 1.06        | -1.50     | -1.10       | 1.04       | -1.24        | -3.30      | -2.66        | -2.83      | -4.02        |
| ZNF709  | zinc finger protein 709   | chr19p13.2           | transcription, DNA-dependent            | ---     | 1.10          | -1.03           | -1.29     | -2.37       | -1.31     | 1.03        | -1.01      | -1.28        | -4.47      | -2.78        | -2.34      | -2.38        |
| ZNF710  | zinc finger protein 710   | chr15q26.1           | transcription, DNA-dependent            | ---     | -1.25         | 1.12            | 1.08      | -1.31       | 1.09      | 1.09        | -1.48      | -1.10        | 3.61       | 2.66         | 4.78       | 3.47         |
| ZNF710  | zinc finger protein 710   | chr15q26.1           | transcription, DNA-dependent            | ---     | -1.09         | 1.09            | -1.46     | -1.71       | 1.15      | 1.44        | -1.48      | 1.17         | 1.01       | 1.83         | -1.82      | -1.11        |
| ZNF711  | zinc finger protein 711   | chrXq21.1            | transcription, DNA-dependent            | ---     | 1.14          | 1.13            | -1.09     | -1.22       | -1.13     | -1.06       | 1.02       | -1.12        | -1.52      | -1.44        | -2.33      | -2.88        |
| ZNF718  | zinc finger protein 718   | chr4p16.3            | transcription, DNA-dependent            | ---     | 1.36          | -1.74           | -2.09     | 1.05        | -1.06     | 1.05        | 1.99       | 1.42         | 1.20       | -1.31        | -1.01      | 1.07         |
| ZNF718  | zinc finger protein 718   | chr4p16.3            | transcription, DNA-dependent            | ---     | -1.11         | -1.11           | 1.19      | 1.10        | -1.36     | -1.30       | 1.01       | 1.00         | -1.83      | -1.60        | -1.69      | -2.26        |
| ZNF720  | zinc finger protein 720   | chr16p11.2           | regulation of transcription, DNA-depend | ---     | 1.13          | -1.11           | 1.16      | 1.31        | 1.06      | 1.14        | 1.01       | -1.09        | -1.03      | 1.08         | 1.40       | 1.31         |
| ZNF732  | zinc finger protein 732   | chr4p16.3            | transcription, DNA-dependent            | ---     | 1.03          | -1.94           | 1.25      | -1.07       | 1.07      | -1.24       | 3.83       | 6.18         | -1.20      | -1.46        | -1.66      | -1.03        |
| ZNF738  | zinc finger protein 738   | chr19p12             | protein polyubiquitination              | ---     | 1.46          | 1.29            | 1.07      | -1.27       | -1.27     | 1.03        | -2.11      | -1.22        | -2.63      | -2.33        | -2.71      | -4.17        |
| ZNF746  | zinc finger protein 746   | chr7q36.1            | transcription, DNA-dependent            | ---     | 1.06          | 1.08            | -1.09     | -1.11       | 1.04      | -1.02       | -1.12      | -1.03        | -1.30      | -1.37        | 1.05       | 1.00         |
| ZNF747  | zinc finger protein 747   | chr16p11.2           | regulation of transcription, DNA-depend | ---     | -1.04         | -1.16           | 1.01      | 1.10        | 1.19      | 1.11        | 1.02       | -1.17        | -1.50      | -1.31        | -1.18      | -1.05        |
| ZNF747  | zinc finger protein 747   | chr16p11.2           | regulation of transcription, DNA-depend | ---     | -1.12         | -1.08           | 1.05      | -1.08       | 1.08      | 1.01        | -1.01      | -1.02        | -1.49      | -1.49        | -1.33      | -1.32        |
| ZNF747  | zinc finger protein 747   | chr16p11.2           | regulation of transcription, DNA-depend | ---     | -1.04         | -1.05           | 1.06      | -1.18       | 1.09      | 1.03        | -1.16      | 1.11         | -1.96      | -1.61        | -1.56      | -1.55        |
| ZNF749  | zinc finger protein 749   | chr19q13.43          | transcription, DNA-dependent            | ---     | 1.36          | 1.37            | 1.84      | 1.23        | -1.12     | 1.12        | -1.87      | 1.05         | 1.06       | 1.46         | 1.43       | 1.03         |
| ZNF75A  | zinc finger protein 75a   | chr16p13.3           | transcription, DNA-dependent            | ---     | 1.11          | 1.08            | 1.15      | 1.16        | 1.11      | 1.26        | 1.07       | 1.22         | -1.66      | -1.68        | -1.28      | -1.08        |
| ZNF75A  | zinc finger protein 75a   | chr16p13.3           | transcription, DNA-dependent            | ---     | 1.07          | 1.04            | 1.09      | 1.08        | 1.12      | 1.12        | -1.14      | 1.01         | -1.96      | -1.43        | -1.05      | 1.07         |
| ZNF75A  | zinc finger protein 75a   | chr16p13.3           | transcription, DNA-dependent            | ---     | -1.38         | 1.04            | -1.11     | 1.09        | -1.02     | -1.09       | 1.29       | 1.07         | -2.15      | -2.54        | -1.21      | -1.28        |
| ZNF75D  | zinc finger protein 75D   | chrXq26.3            | transcription, DNA-dependent            | ---     | -1.22         | -1.21           | 1.59      | 1.07        | 1.29      | 1.20        | 1.10       | -1.40        | -2.06      | -3.29        | -1.60      | -1.84        |
| ZNF75D  | zinc finger protein 75D   | chrXq26.3            | transcription, DNA-dependent            | ---     | -1.00         | 1.04            | 1.15      | 1.08        | -1.01     | 1.01        | -1.20      | -1.14        | -2.32      | -1.85        | -1.74      | -1.87        |
| ZNF76   | zinc finger protein 76    | chr6p21.31           | transcription, DNA-dependent            | ---     | 1.15          | 1.49            | -1.10     | -1.08       | 1.05      | 1.15        | -1.29      | 1.08         | -1.67      | -1.70        | -1.46      | -1.66        |
| ZNF764  | zinc finger protein 764   | chr16p11.2           | transcription, DNA-dependent            | ---     | -1.06         | -1.27           | 1.17      | 1.17        | 1.05      | 1.04        | -1.16      | 1.03         | -1.32      | -1.18        | -1.50      | -1.57        |
| ZNF764  | zinc finger protein 764   | chr16p11.2           | transcription, DNA-dependent            | ---     | -1.07         | -1.15           | 1.12      | 1.12        | 1.08      | 1.10        | -1.07      | 1.03         | -1.74      | -1.58        | -1.36      | -1.38        |
| ZNF766  | zinc finger protein 766   | chr19q13.41          | transcription, DNA-dependent            | ---     | -1.03         | 1.04            | -1.10     | 1.09        | 1.17      | 1.14        | -1.08      | 1.05         | 1.11       | 1.15         | 1.49       | 1.75         |
| ZNF77   | zinc finger protein 77    | chr19p13.3           | transcription, DNA-dependent            | ---     | -1.08         | -1.11           | -1.17     | -1.07       | -1.08     | 1.02        | 1.06       | 1.14         | 1.29       | 1.01         | 1.73       | 1.63         |
| ZNF77   | zinc finger protein 77    | chr19p13.3           | transcription, DNA-dependent            | ---     | -1.04         | 1.29            | -1.68     | -4.16       | 1.15      | 1.36        | -1.08      | -1.32        | 1.66       | 2.66         | 2.56       |              |
| ZNF775  | zinc finger protein 775   | chr7q36.1            | transcription, DNA-dependent            | ---     | -1.21         | -1.33           | -1.15     | 1.10        | 1.08      | -1.37       | 1.14       | 1.63         | 1.43       | 1.45         | 1.06       | 1.26         |
| ZNF776  | zinc finger protein 776   | chr19q13.43          | transcription, DNA-dependent            | ---     | 1.36          | 1.25            | 1.13      | 1.08        | -1.13     | 1.08        | -1.56      | -1.25        | -1.46      | -1.40        | -1.55      | -1.32        |
| ZNF780A | zinc finger protein 780A  | chr19q13.2           | transcription, DNA-dependent            | ---     | 1.41          | 1.35            | 1.06      | 1.10        | -1.18     | 1.04        | -1.14      | 1.03         | -2.88      | -2.13        | -1.45      | -2.02        |
| ZNF780A | zinc finger protein 780A  | chr19q13.2           | transcription, DNA-dependent            | ---     | 1.00          | -1.28           | 1.03      | -1.04       | -1.24     | 1.07        | -1.16      | -1.23        | -2.59      | -2.80        | -2.53      | -3.35        |
| ZNF780B | zinc finger protein 780B  | chr19q13.2           | transcription, DNA-dependent            | ---     | -1.03         | -1.39           | -1.30     | -1.28       | -1.24     | -1.04       | 1.13       | 1.25         | -4.16      | -2.86        | -2.88      | -6.69        |
| ZNF782  | zinc finger protein 782   | chr9q22.33           | transcription, DNA-dependent            | ---     | 1.49          | 1.08            | 1.44      | 1.33        | 1.11      | -1.05       | -2.03      | -1.52        | -4.25      | -3.05        | -5.98      | -3.88        |
| ZNF783  | zinc finger family member | chr7q36.1            | transcription, DNA-dependent            | ---     | 1.09          | 1.07            | -1.01     | 1.05        | 1.07      | 1.04        | -1.01      | -1.05        | -1.35      | -1.36        | -1.06      | 1.07         |
| ZNF785  | zinc finger protein 785   | chr16p11.2           | transcription, DNA-dependent            | ---     | 1.31          | 1.09            | 1.24      | -1.01       | 1.06      | 1.11        | -1.15      | -1.02        | -1.92      | -1.70        | -1.83      | -2.02        |
| ZNF785  | zinc finger protein 785   | chr16p11.2           | transcription, DNA-dependent            | ---     | 1.14          | 1.09            | 1.24      | -1.04       | -1.17     | 1.01        | -1.05      | -1.28        | -2.06      | -1.74        | -2.22      | -2.60        |
| ZNF786  | zinc finger protein 786   | chr7q36.1            | transcription, DNA-dependent            | ---     | 1.04          | 1.06            | -1.17     | -1.03       | 1.04      | -1.00       | -1.25      | -1.08        | -1.37      | -1.32        | -1.40      | -1.44        |
| ZNF787  | zinc finger protein 787   | chr19q13.43          | transcription, DNA-dependent            | ---     | 1.15          | -1.05           | 1.00      | 1.04        | 1.07      | -1.01       | 1.44       | 1.20         | 1.46       | 1.20         | 1.38       | 1.49         |
| ZNF789  | zinc finger protein 789   | chr7q22.1            | transcription, DNA-dependent            | ---     | 1.12          | 1.27            | -1.20     | 1.15        | 1.00      | -1.11       | -1.29      | -1.38        | -1.89      | -2.35        | -2.00      | -3.29        |
| ZNF789  | zinc finger protein 789   | chr7q22.1            | transcription, DNA-dependent            | ---     | 1.41          | 1.08            | -1.02     | -1.17       | -1.59     | -1.26       | -1.07      | -1.53        | -1.42      | -1.41        | -4.46      | -2.62        |
| ZNF789  | zinc finger protein 789   | chr7q22.1            | transcription, DNA-dependent            | ---     | 1.06          | 1.06            | 1.15      | 1.07        | 1.13      | 1.02        | -1.13      | -1.02        | -1.78      | -1.91        | -3.35      | -2.12        |
| ZNF793  | zinc finger protein 793   | chr19q13.12          | transcription, DNA-dependent            | ---     | 1.97          | -1.33           | -1.49     | -5.07       | 1.32      | 1.09        | 1.36       | 2.10         | 11.13      | 4.76         | -2.86      | 1.02         |
| ZNF804A | zinc finger protein 804A  | chr2q32.1            | 0                                       | ---     | 1.12          | 1.15            | 1.32      | 1.60        | -1.03     | -1.01       | -1.26      | 1.61         | -4.25      | -4.81        | -3.17      | -3.62        |
| ZNF804B | zinc finger protein 804B  | chr7q21.13           | 0                                       | ---     | 1.29          | 1.96            | -1.02     | 1.62        | 4.09      | -1.07       | 1.55       | -1.03        | 1.43       | -1.17        | 1.43       | -1.14        |
| ZNF805  | zinc finger protein 805   | chr19q13.43          | transcription, DNA-dependent            | ---     | -1.48         | -1.39           | 1.15      | 1.11        | 1.25      | 1.43        | -1.01      | -1.04        | -1.00      | 1.14         | 1.34       | 1.61         |
| ZNF805  | zinc finger protein 805   | chr19q13.43          | transcription, DNA-dependent            | ---     | -1.43         | -1.27           | -1.01     | 1.08        | 1.12      | 1.33        | 1.09       | 1.19         | 1.14       | 1.11         | 1.79       | 2.24         |
| ZNF805  | zinc finger protein 805   | chr19q13.43          | transcription, DNA-dependent            | ---     | -1.14         | -1.14           | 1.20      | 1.07        | 1.04      | 1.04        | -1.09      | -1.18        | 1.04       | 1.17         | 1.42       | 1.42         |
| ZNF81   | zinc finger protein 81    | chrXp11.23           | transcription, DNA-dependent            | ---     | -1.91         | -1.85           | -1.01     | -1.28       | 1.04      | -1.48       | -1.78      | 2.63         | 1.46       | 1.04         | 1.80       | 1.45         |
| ZNF81   | zinc finger protein 81    | chrXp11.23           | transcription, DNA-dependent            | ---     | 1.19          | 1.05            | 1.44      | -1.07       | 1.16      | -1.06       | 1.19       | -1.91        | 1.62       | 2.09         | 1.65       | 1.13         |
| ZNF813  | zinc finger protein 813   | chr19q13.42          | transcription, DNA-dependent            | ---     | 1.16          | 1.19            | 1.11      | 1.21        | -1.22     | -1.19       | -1.13      | -1.35        | 1.01       | 1.03         | 2.05       | 1.82         |
| ZNF814  | zinc finger protein 814   | chr19q13.43          | regulation of transcription, DNA-depend | ---     | 1.21          | -1.03           | 1.42      | 1.45        | -1.09     | -1.22       | 1.12       | 1.23         | -2.11      | -1.67        | -1.17      | -1.65        |
| ZNF814  | zinc finger protein 814   | chr19q13.43          | regulation of transcription, DNA-depend | ---     | 1.12          | 1.16            | 1.06      | -1.07       | 1.10      | 1.25        | -1.08      | -1.07        | -1.88      | -1.71        | -1.54      | -1.57        |
| ZNF827  | zinc finger protein 827   | chr4q31.22           | transcription, DNA-dependent            | ---     | -1.01         | -1.07           | 1.12      | 1.21        | -1.04     | 1.06        | -1.14      | -1.33        | -1.76      | -1.67        | -1.82      | -2.76        |

| ID          | Gene Title                    | Chromosomal Location | 1st Gene Ontology Biological Process      | Pathway                              | A2497 30 mins | A2497P' 30 mins | A2497 2 h | A2497P' 2 h | A2497 4 h | A2497P' 4 h | A2497 24 h | A2497P' 24 h | A2497 48 h | A2497P' 48 h | A2497 72 h | A2497P' 72 h |
|-------------|-------------------------------|----------------------|-------------------------------------------|--------------------------------------|---------------|-----------------|-----------|-------------|-----------|-------------|------------|--------------|------------|--------------|------------|--------------|
| ZNF827      | zinc finger protein 827       | chr4q31.22           | transcription, DNA-dependent              | ---                                  | -1.04         | -1.29           | 1.00      | 1.22        | -1.01     | -1.51       | -1.90      | -1.45        | -1.15      | -1.24        | -2.10      | -1.69        |
| ZNF827      | zinc finger protein 827       | chr4q31.22           | transcription, DNA-dependent              | ---                                  | 1.03          | 1.00            | 1.10      | -1.03       | 1.10      | -1.02       | 1.02       | 1.27         | -1.82      | -1.45        | -2.33      | -2.07        |
| ZNF829      | zinc finger protein 829       | chr19q13.12          | transcription, DNA-dependent              | ---                                  | 1.11          | 1.31            | -2.39     | -1.76       | -2.04     | 1.93        | -1.01      | -1.87        | 9.80       | 11.20        | -10.55     | 1.01         |
| ZNF83       | zinc finger protein 83        | chr19q13.3           | transcription, DNA-dependent              | ---                                  | -1.01         | -1.11           | -1.09     | 1.06        | -1.20     | 1.07        | -1.70      | -1.01        | -2.25      | -2.55        | -2.25      | -1.72        |
| ZNF836      | zinc finger protein 836       | chr19q13.41          | transcription, DNA-dependent              | ---                                  | -1.17         | -1.17           | -1.05     | 1.22        | -1.06     | -1.03       | 1.21       | 1.20         | 1.98       | 1.85         | 1.86       | 2.28         |
| ZNF836      | zinc finger protein 836       | chr19q13.41          | transcription, DNA-dependent              | ---                                  | -1.10         | 1.11            | 1.16      | 1.17        | 1.22      | 1.06        | 1.56       | 1.32         | 1.68       | 1.93         | 2.21       | 2.70         |
| ZNF839      | zinc finger protein 839       | chr14q32.31          | 0                                         | ---                                  | 1.12          | 1.21            | 1.04      | 1.05        | 1.14      | -1.10       | 1.03       | 1.05         | -1.21      | -1.20        | -1.48      | -1.31        |
| ZNF839      | zinc finger protein 839       | chr14q32.31          | 0                                         | ---                                  | -1.09         | -1.22           | -1.06     | 1.20        | 1.06      | -1.13       | 1.00       | 1.07         | -1.78      | -1.97        | -1.75      | -1.55        |
| ZNF84       | zinc finger protein 84        | chr12q24.33          | transcription, DNA-dependent              | ---                                  | -1.05         | -1.07           | 1.02      | 1.11        | 1.02      | 1.09        | 1.03       | -1.08        | -1.57      | -1.16        | 1.06       | 1.28         |
| ZNF852      | zinc finger protein 852       | chr3p21.31           | regulation of transcription, DNA-depend   | ---                                  | 1.16          | -1.04           | -1.17     | -1.26       | 1.10      | -1.12       | 1.25       | 1.81         | -1.40      | -1.42        | 1.03       | 1.16         |
| ZNF853      | zinc finger protein 853       | chr7p22.1            | 0                                         | ---                                  | 1.13          | 1.15            | -5.20     | -1.26       | 2.89      | 1.85        | -1.77      | -4.99        | 2.71       | 2.51         | -6.59      | -1.94        |
| ZNF879      | zinc finger protein 879       | chr5q35.3            | transcription, DNA-dependent              | ---                                  | 1.15          | -1.09           | -1.01     | -1.23       | 1.03      | 1.19        | -1.06      | -1.00        | -4.89      | -2.72        | -1.64      | -1.65        |
| ZNF880      | zinc finger protein 880       | chr19q13.41          | regulation of transcription, DNA-depend   | ---                                  | 1.67          | 1.09            | -1.02     | 1.52        | 2.20      | 2.99        | -2.41      | 1.19         | 1.68       | 1.18         | 3.10       | 3.80         |
| ZNF883      | zinc finger protein 883       | chr9q32              | transcription, DNA-dependent              | ---                                  | 1.09          | 1.01            | 1.03      | -1.06       | 1.17      | 1.12        | -1.23      | -1.02        | -2.25      | -1.79        | -2.32      | -2.31        |
| ZNF91       | zinc finger protein 91        | chr19p12             | transcription, DNA-dependent              | ---                                  | 1.03          | 1.24            | 1.18      | 1.05        | -1.10     | 1.21        | -1.37      | -1.10        | -2.63      | -2.95        | -1.57      | -2.41        |
| ZNF93       | zinc finger protein 93        | chr19p12             | transcription, DNA-dependent              | ---                                  | -1.47         | -1.48           | -2.52     | -4.87       | -2.28     | -2.52       | -3.04      | 2.36         | 1.02       | 2.35         | 1.55       | -1.25        |
| ZNFX1       | zinc finger, NFX1-type con    | chr20q13.13          | regulation of transcription, DNA-depend   | ---                                  | -1.12         | -1.11           | -1.03     | -1.20       | 1.06      | 1.04        | 1.44       | 1.34         | -1.03      | -1.05        | 1.10       | 1.07         |
| ZNHIT1      | zinc finger, HIT-type conta   | chr7q22.1            | negative regulation of transcription from | ---                                  | -1.06         | -1.05           | -1.09     | -1.09       | -1.13     | -1.14       | -1.17      | -1.13        | 1.11       | 1.07         | 1.01       | 1.04         |
| ZNHIT3      | zinc finger, HIT-type conta   | chr17q12             | regulation of transcription, DNA-depend   | ---                                  | -1.02         | 1.03            | 1.06      | -1.05       | 1.09      | -1.01       | 1.19       | -1.04        | 1.22       | 1.02         | 1.32       | 1.21         |
| ZNHIT6      | zinc finger, HIT-type conta   | chr1q22.3            | box C                                     | ---                                  | 1.01          | -1.47           | 1.15      | -1.02       | -1.09     | 1.17        | -1.85      | -1.71        | -2.61      | -2.03        | -1.96      | -1.96        |
| ZNRD1       | zinc ribbon domain contain    | chr6p21.3            | nucleobase-containing compound metabo     | ---                                  | -1.05         | -1.09           | -1.08     | -1.04       | 1.12      | 1.13        | 1.03       | 1.11         | 1.41       | 1.20         | 1.32       | 1.17         |
| ZNRD1       | zinc ribbon domain contain    | chr6p21.3            | nucleobase-containing compound metabo     | ---                                  | -1.12         | -1.07           | -1.00     | -1.01       | 1.15      | 1.04        | 1.12       | 1.11         | 1.24       | 1.25         | 1.19       | 1.25         |
| ZNRD1-AS1   | ZNRD1 antisense RNA 1         | chr6p22.1            | 0                                         | ---                                  | 7.27          | 7.36            | -3.44     | -1.75       | -2.42     | -1.08       | -1.99      | -1.67        | 2.38       | 1.42         | 1.70       | 1.68         |
| ZNRD1-AS1   | ZNRD1 antisense RNA 1         | chr6p22.1            | 0                                         | ---                                  | -1.15         | -4.53           | 1.29      | -1.03       | -1.20     | 1.02        | -1.49      | -2.13        | -1.28      | -2.14        | -1.04      | 1.56         |
| ZNRF1       | zinc and ring finger 1, E3 ub | chr16q23.1           | protein ubiquitination                    | ---                                  | -1.10         | -1.13           | 1.00      | -1.13       | -1.03     | -1.10       | 1.06       | 1.08         | 1.41       | 1.57         | 1.36       | 1.52         |
| ZNRF1       | zinc and ring finger 1, E3 ub | chr16q23.1           | protein ubiquitination                    | ---                                  | -1.16         | -1.18           | 1.15      | 1.05        | 1.30      | 1.00        | 1.02       | -1.16        | 1.36       | 1.47         | 1.32       | 1.48         |
| ZNRF1       | zinc and ring finger 1, E3 ub | chr16q23.1           | protein ubiquitination                    | ---                                  | -1.25         | -1.15           | -1.07     | 1.12        | 1.03      | -1.05       | -1.28      | -1.29        | -1.76      | -1.83        | -3.11      | -2.24        |
| ZNRF1       | zinc and ring finger 1, E3 ub | chr16q23.1           | protein ubiquitination                    | ---                                  | 1.04          | 1.08            | 1.00      | -1.10       | 1.06      | -1.00       | -1.17      | -1.16        | -1.23      | -1.02        | -1.12      | -1.07        |
| ZNRF2       | zinc and ring finger 2        | chr7p14.3            | protein ubiquitination                    | ---                                  | 1.25          | 1.29            | 1.09      | -1.05       | -1.04     | -1.08       | -1.00      | 1.06         | -1.88      | -1.53        | -1.15      | -1.50        |
| ZNRF2P1     | zinc and ring finger 2 pseud  | chr7p14.3            | 0                                         | ---                                  | -2.34         | -1.20           | -1.08     | -1.39       | 1.14      | -1.28       | 3.53       | 3.62         | 1.03       | 1.87         | -1.06      | 1.97         |
| ZNRF3       | zinc and ring finger 3        | chr22q12.1           | ubiquitin-dependent protein catabolic pro | ---                                  | 1.08          | 1.10            | 1.04      | 1.10        | 1.09      | 1.15        | -1.26      | -1.23        | -1.75      | -1.49        | -1.28      | -1.42        |
| ZP2         | zona pellucida glycoprotein   | chr16p12             | manganese ion transport                   | Ovarian_Infertility_Genes // GenMAPP | 2.34          | 1.77            | 1.74      | 1.82        | 1.64      | 1.37        | -4.40      | -1.98        | 1.62       | 1.50         | 1.66       | 1.03         |
| ZBPB2       | zona pellucida binding prot   | chr17q12             | acrosome assembly                         | ---                                  | 1.16          | 1.19            | 1.18      | 2.46        | -1.68     | 1.18        | 1.73       | 2.19         | 2.03       | -2.68        | -1.82      | -1.30        |
| ZRANB1      | zinc finger, RAN-binding d    | chr10q26.13          | proteolysis                               | ---                                  | 1.13          | 1.10            | 1.15      | 1.11        | 1.07      | -1.06       | 1.02       | 1.02         | 1.09       | 1.05         | 1.56       | 1.40         |
| ZRANB1      | zinc finger, RAN-binding d    | chr10q26.13          | proteolysis                               | ---                                  | -1.12         | -1.01           | 1.08      | 1.00        | -1.01     | -1.01       | 1.07       | 1.13         | -1.02      | -1.01        | 1.36       | 1.27         |
| ZRANB2      | zinc finger, RAN-binding d    | chr1p31              | regulation of transcription, DNA-depend   | ---                                  | -1.03         | 1.03            | -1.01     | 1.03        | 1.03      | -1.02       | 1.24       | 1.22         | 1.06       | -1.06        | 1.74       | 1.71         |
| ZRANB2      | zinc finger, RAN-binding d    | chr1p31              | regulation of transcription, DNA-depend   | ---                                  | 1.49          | 4.04            | 2.45      | 1.59        | -1.15     | 1.49        | 1.74       | 1.12         | 1.16       | -1.14        | 1.33       | 1.23         |
| ZRANB2-AS   | ZRANB2 antisense RNA 1        | chr1p31.1            | 0                                         | ---                                  | -1.11         | -1.15           | -3.13     | -1.39       | -2.15     | -1.31       | 1.01       | 1.72         | 1.38       | 1.01         | -2.83      | -1.79        |
| ZRANB3      | zinc finger, RAN-binding d    | chr2q21.3            | DNA strand renaturation                   | ---                                  | 1.76          | 1.79            | 1.29      | -1.18       | -2.69     | -1.33       | 1.01       | -1.21        | -1.89      | -1.33        | 1.12       | 1.74         |
| ZRANB3      | zinc finger, RAN-binding d    | chr2q21.3            | DNA strand renaturation                   | ---                                  | -1.03         | -1.11           | 1.13      | 1.25        | -1.01     | 1.13        | 1.20       | 1.44         | -1.67      | -1.59        | -1.37      | -1.21        |
| ZRSR2       | zinc finger (CCCH type), R    | chrXp22.1            | spliceosomal complex assembly             | ---                                  | -1.02         | -1.07           | 1.17      | 1.18        | 1.13      | -1.01       | 1.05       | 1.06         | 1.22       | 1.14         | 1.52       | 1.56         |
| ZRSR2       | zinc finger (CCCH type), R    | chrXp22.1            | spliceosomal complex assembly             | ---                                  | -1.06         | -1.01           | 1.09      | 1.07        | 1.11      | 1.03        | 1.18       | 1.14         | 1.31       | 1.20         | 1.62       | 1.66         |
| ZSCAN12     | zinc finger and SCAN dom      | chr6p21              | transcription, DNA-dependent              | ---                                  | -1.02         | -1.11           | 1.04      | -1.10       | -1.03     | 1.03        | 1.04       | 1.35         | -1.81      | -1.82        | -1.19      | -1.16        |
| ZSCAN12     | zinc finger and SCAN dom      | chr6p21              | transcription, DNA-dependent              | ---                                  | -1.11         | 1.10            | 1.13      | -1.15       | 1.04      | 1.07        | -1.14      | -1.09        | -2.08      | -1.45        | -1.22      | -1.35        |
| ZSCAN12P1   | zinc finger and SCAN dom      | chr6p22.1            | 0                                         | ---                                  | -1.25         | -1.43           | 1.57      | 1.57        | -1.30     | -1.14       | -1.14      | 1.28         | 2.83       | 2.40         | 2.41       | 1.80         |
| ZSCAN16     | zinc finger and SCAN dom      | chr6p22.1            | transcription, DNA-dependent              | ---                                  | 1.01          | -1.01           | -1.02     | -1.00       | 1.07      | 1.01        | -1.11      | -1.02        | -1.48      | -1.81        | -1.17      | -1.28        |
| ZSCAN2      | zinc finger and SCAN dom      | chr15q25.2           | transcription, DNA-dependent              | ---                                  | -1.00         | -1.04           | 1.09      | 1.20        | -1.04     | -1.03       | 1.03       | 1.15         | -1.41      | -1.32        | 1.06       | 1.08         |
| ZSCAN20     | zinc finger and SCAN dom      | chr1p34.3            | transcription, DNA-dependent              | ---                                  | 1.08          | 1.04            | -1.01     | 1.03        | 1.28      | 1.11        | -1.26      | -1.04        | -2.17      | -1.75        | -2.33      | -1.56        |
| ZSCAN22     | zinc finger and SCAN dom      | chr19q13.43          | transcription, DNA-dependent              | ---                                  | -1.05         | 1.04            | 1.03      | 1.05        | 1.17      | 1.06        | -1.12      | -1.03        | -1.70      | -1.22        | -1.23      | 1.03         |
| ZSCAN26     | zinc finger and SCAN dom      | chr6p21.31           | transcription, DNA-dependent              | ---                                  | -1.14         | -1.28           | 1.29      | 1.19        | 1.20      | -1.07       | -1.00      | -1.14        | -2.04      | -2.54        | -1.65      | -1.80        |
| ZSCAN29     | zinc finger and SCAN dom      | chr15q15.3           | transcription, DNA-dependent              | ---                                  | -1.08         | -1.09           | 1.04      | 1.02        | 1.06      | 1.07        | 1.05       | 1.12         | -1.00      | 1.02         | 1.19       | 1.23         |
| ZSCAN30     | zinc finger and SCAN dom      | chr18q12.2           | transcription, DNA-dependent              | ---                                  | -1.02         | 1.04            | 1.26      | 1.15        | 1.89      | 1.99        | 1.19       | -1.08        | -2.37      | -1.91        | -2.00      | -2.13        |
| ZSCAN30     | zinc finger and SCAN dom      | chr18q12.2           | transcription, DNA-dependent              | ---                                  | 1.07          | 1.26            | 1.10      | 1.07        | 1.13      | -1.06       | -1.10      | -1.20        | -1.80      | -1.69        | -1.92      | -1.70        |
| ZSCAN31     | zinc finger and SCAN dom      | chr6p21.31//6p22.3   | transcription, DNA-dependent              | ---                                  | -1.08         | -1.04           | 1.06      | 1.01        | 1.02      | 1.09        | -1.05      | 1.10         | -1.70      | -1.40        | -1.54      | -1.31        |
| ZSCAN32     | zinc finger and SCAN dom      | chr16p13.3           | transcription, DNA-dependent              | ---                                  | -1.12         | 1.08            | -1.39     | -1.10       | 1.89      | 1.85        | 1.28       | -1.12        | -1.30      | -1.16        | 1.93       | 1.75         |
| ZSCAN5A     | zinc finger and SCAN dom      | chr19q13.43          | transcription, DNA-dependent              | ---                                  | -1.08         | -1.06           | 1.12      | -1.15       | 1.34      | 1.14        | -1.25      | -1.19        | -1.82      | -1.48        | -1.99      | -1.56        |
| ZSCAN9      | zinc finger and SCAN dom      | chr6p21.3            | transcription, DNA-dependent              | ---                                  | 1.05          | 1.03            | 1.26      | 1.17        | 1.13      | 1.09        | 1.15       | -1.06        | -1.85      | -1.51        | -1.46      | -1.86        |
| ZSWIM5      | zinc finger, SWIM-type co     | chr1p34.1            | 0                                         | ---                                  | -1.19         | -1.15           | 1.25      | 1.16        | 1.07      | -1.82       | 1.08       | -1.03        | -1.51      | -2.24        | -2.52      | -8.85        |
| ZSWIM6      | zinc finger, SWIM-type co     | chr5q12.1            | neuron projection morphogenesis           | ---                                  | 1.07          | 1.06            | 1.04      | 1.02        | -1.06     | -1.02       | -1.10      | -1.09        | 1.06       | 1.14         | 1.31       | 1.18         |
| ZUFSP       | zinc finger with UFM1-spe     | chr6q22.1            | 0                                         | ---                                  | 1.14          | 1.20            | -1.01     | -1.07       | 1.09      | 1.01        | -1.08      | 1.01         | 1.05       | 1.23         | 1.71       | 1.57         |
| ZWILCH      | zwilch kinetochore protein    | chr15q22.31          | M phase of mitotic cell cycle             | ---                                  | -1.03         | -1.07           | 1.13      | 1.06        | 1.00      | -1.10       | -1.22      | -1.25        | -1.77      | -1.60        | -1.09      | -1.25        |
| ZWILCH      | zwilch kinetochore protein    | chr15q22.31          | M phase of mitotic cell cycle             | ---                                  | -1.01         | -1.02           | 1.04      | 1.15        | 1.03      | 1.04        | -1.12      | -1.03        | -1.19      | -1.26        | -1.16      | -1.13        |
| ZWINT       | ZW10 interacting kinetoch     | chr10q21-q22         | mitotic sister chromatid segregation      | ---                                  | 1.06          | 1.06            | -1.06     | -1.06       | -1.06     | 1.05        | -1.21      | -1.16        | -1.89      | -1.70        | -1.88      | -1.92        |
| ZXDA        | zinc finger, X-linked, dupli  | chrXp11.1            | transcription, DNA-dependent              | ---                                  | 1.20          | 1.19            | 1.11      | 1.20        | -1.08     | 1.09        | -2.16      | -1.36        | -2.63      | -2.67        | -1.49      | -2.40        |
| ZXDA /// ZX | zinc finger, X-linked, dupli  | chrXp11.1 /// chrXp  | transcription, DNA-dependent              | ---                                  | -1.16         | -1.10           | -1.24     | -1.22       | -1.11     | 1.19        | 1.09       | 1.10         | 1.24       | 1.08         | 1.37       | -1.08        |
| ZXDA /// ZX | zinc finger, X-linked, dupli  | chrXp11.1 /// chrXp  | transcription, DNA-dependent              | ---                                  | -1.09         | -1.18           | -1.43     | -1.30       | -1.19     | -1.35       | -1.10      | -1.07        | 1.14       | 1.19         | 1.39       | 1.04         |

| ID     | Gene Title                        | Chromosomal Location | 1st Gene Ontology Biological Process | Pathway                                   | A2497 30 mins | A2497P' 30 mins | A2497 2 h | A2497P' 2 h | A2497 4 h | A2497P' 4 h | A2497 24 h | A2497P' 24 h | A2497 48 h | A2497P' 48 h | A2497 72 h | A2497P' 72 h |
|--------|-----------------------------------|----------------------|--------------------------------------|-------------------------------------------|---------------|-----------------|-----------|-------------|-----------|-------------|------------|--------------|------------|--------------|------------|--------------|
| ZXDB   | zinc finger, X-linked, duplicated | chrXp11.21           | transcription, DNA-dependent         | ---                                       | 1.04          | 1.02            | 1.07      | -1.02       | -1.02     | 1.14        | -1.34      | -1.22        | -1.94      | -1.49        | -1.82      | -2.08        |
| ZXDC   | ZXD family zinc finger C          | chr3q21.3            | transcription, DNA-dependent         | ---                                       | -1.07         | -1.04           | -1.00     | 1.02        | 1.05      | 1.03        | -1.39      | -1.02        | -1.92      | -2.16        | -1.50      | -1.06        |
| ZXDC   | ZXD family zinc finger C          | chr3q21.3            | transcription, DNA-dependent         | ---                                       | -1.20         | -1.11           | 1.32      | 1.04        | 1.11      | 1.13        | 1.07       | -1.08        | 1.03       | 1.26         | 1.41       | 1.58         |
| ZXDC   | ZXD family zinc finger C          | chr3q21.3            | transcription, DNA-dependent         | ---                                       | 1.36          | 1.19            | 1.21      | 1.25        | -1.20     | -1.08       | 1.06       | 1.28         | 1.35       | 1.48         | 1.61       | 1.37         |
| ZXDC   | ZXD family zinc finger C          | chr3q21.3            | transcription, DNA-dependent         | ---                                       | -1.03         | -1.10           | 1.18      | 1.05        | -1.16     | -1.16       | 1.14       | 1.25         | 1.03       | 1.01         | 1.42       | 1.40         |
| ZYG11A | zyg-11 family member A            | chr1p32.3            | 0                                    | ---                                       | -1.08         | 1.00            | -1.03     | -1.06       | 1.05      | 1.02        | 1.10       | 1.10         | -1.38      | -1.40        | -1.06      | -1.11        |
| ZYG11B | zyg-11 family member B            | chr1p32.3            | 0                                    | ---                                       | -1.17         | -1.15           | 1.13      | 1.08        | -1.05     | -1.00       | -1.17      | -1.18        | -1.57      | -1.18        | -1.04      | -1.34        |
| ZYG11B | zyg-11 family member B            | chr1p32.3            | 0                                    | ---                                       | -1.27         | -1.15           | 1.02      | -1.08       | 1.08      | -1.01       | -1.29      | -1.42        | -1.62      | -1.19        | -1.09      | -1.16        |
| ZYX    | zyxin                             | chr7q32              | cell adhesion                        | Integrin-mediated_cell_adhesion_KEGG // C | -1.08         | -1.10           | 1.06      | 1.19        | 1.07      | -1.08       | 1.40       | 1.22         | 2.14       | 1.46         | 1.73       | 1.94         |
| ZYX    | zyxin                             | chr7q32              | cell adhesion                        | Integrin-mediated_cell_adhesion_KEGG // C | -1.09         | -1.09           | 1.07      | 1.19        | 1.07      | -1.08       | 1.36       | 1.30         | 1.93       | 1.44         | 1.79       | 2.10         |
| ZZEF1  | zinc finger, ZZ-type with E       | chr17p13.2           | 0                                    | ---                                       | 1.73          | 1.19            | -1.03     | -1.28       | -1.34     | -1.08       | 1.63       | 1.31         | 1.48       | 1.57         | 1.99       | 1.29         |
| ZZEF1  | zinc finger, ZZ-type with E       | chr17p13.2           | 0                                    | ---                                       | -1.03         | -1.32           | -1.08     | -1.32       | -1.32     | -1.18       | -1.02      | 1.11         | 1.85       | 1.55         | 1.40       | 1.37         |
| ZZEF1  | zinc finger, ZZ-type with E       | chr17p13.2           | 0                                    | ---                                       | 1.29          | 1.23            | 1.01      | -1.07       | -1.24     | -1.21       | -1.10      | 1.03         | -2.20      | -1.86        | -1.75      | -1.66        |

**Supplemental Table S2.** Statistically significant differentially expressed genes for A2497 vs. A2497P<sup>-</sup> infected cells at 30 min, 2, 4, 24, 48 and 72 h PI. The 616 differentially expressed genes for A2497 vs. A2497P<sup>-</sup> infected cells are shown at 30 min, 2, 4, 24, 48 and 72 h PI. Left to right columns include Gene Identification (ID), Gene title, chromosomal location in the HeLa 229 genome, 1<sup>st</sup> Gene Ontology Category: Biological Process, and Pathway. Expression in A2497 vs. A2497P<sup>-</sup> for each time point is shown in the columns labeled A2497 30 min, A2497 2 h, A2497 4 h, A2497 24 h, A2497 48 h, and A2497 72 h. Numbers in cells represent fold changes in gene expression for each gene at each time point. Numbers in italics are significant ( $p \leq 0.05$ ) while non-italic numbers are not significant ( $p \geq 0.05$ ), but are included here for the purpose of showing directionality.

Table S2. Statistically significant differentially expressed genes for A2497 vs A2497P' infected cells at 30 mins, 2, 4, 24, 48 and 72 h.

| ID               | Gene Title                    | Chromosomal Location  | 1st Gene Ontology Biological Process         | Pathway                                     | A2497 30 mins | A2497 2 h | A2497 4 h | A2497 24 h | A2497 48 h | A2497 72 h |
|------------------|-------------------------------|-----------------------|----------------------------------------------|---------------------------------------------|---------------|-----------|-----------|------------|------------|------------|
| ABCB9            | ATP-binding cassette, sub-f   | chr12q24              | positive regulation of T cell mediated cyto  | ---                                         | 1.29          | 1.18      | -1.09     | -1.02      | -2.48      | -1.42      |
| ABCC2            | ATP-binding cassette, sub-f   | chr10q24              | ATP catabolic process                        | Irinotecan_pathway_PharmGKB // GenMAP       | -1.25         | -1.10     | 1.14      | -1.43      | 1.96       | 2.00       |
| AC007365.3 /// O | NULL /// NULL                 | ---                   | 0                                            | ---                                         | 3.38          | 1.92      | -1.21     | -2.44      | 1.15       | -1.21      |
| AC013733.4 /// O | NULL /// NULL                 | ---                   | 0                                            | ---                                         | 2.18          | -1.09     | 2.74      | -1.23      | 2.77       | -1.57      |
| ACSL5            | acyl-CoA synthetase long-ch   | chr10q25.1-q25.2      | long-chain fatty acid metabolic process      | Fatty_Acid_Degradation // GenMAPP           | -1.01         | 1.02      | 1.10      | 1.19       | 1.41       | 1.30       |
| ACSM2A           | acyl-CoA synthetase medium    | chr16p12.3            | lipid metabolic process                      | ---                                         | 2.01          | 2.07      | 1.42      | -1.91      | 1.20       | -6.17      |
| ACSM2A           | acyl-CoA synthetase medium    | chr16p12.3            | fatty acid metabolic process                 | ---                                         | -1.78         | 1.09      | 2.75      | -1.76      | 13.73      | 1.22       |
| ACTC1            | actin, alpha, cardiac muscle  | chr15q14              | ATP catabolic process                        | Smooth_muscle_contraction // GenMAPP ///    | 1.08          | -1.16     | 1.10      | -1.06      | -1.16      | 1.69       |
| ADAMTS5          | ADAM metalloproteinase with   | chr21q21.3            | proteolysis                                  | ---                                         | 1.01          | 1.05      | 1.10      | -1.18      | 1.25       | 1.16       |
| ADAMTS5          | ADAM metalloproteinase with   | chr21q21.3            | proteolysis                                  | ---                                         | 1.08          | -1.03     | 1.12      | -1.23      | 1.50       | 1.10       |
| AHNAK2           | AHNAK nucleoprotein 2         | chr14q32.33           | 0                                            | ---                                         | 1.12          | -1.18     | -1.02     | -1.03      | -1.27      | -1.65      |
| AIM1             | absent in melanoma 1          | chr6q21               | 0                                            | ---                                         | -1.02         | -1.06     | -1.01     | -1.33      | -1.34      | -1.25      |
| AKAP10           | A kinase (PRKA) anchor pr     | chr17p11.1            | signal transduction                          | G_Protein_Signaling // GenMAPP              | -1.13         | 1.21      | 1.11      | -1.06      | -1.46      | 1.06       |
| AKIP1 /// NUAKE  | A kinase (PRKA) interacting   | chr1p15.3 /// chr1q32 | protein phosphorylation                      | ---                                         | -1.00         | -1.17     | 1.14      | -1.03      | 1.51       | 1.34       |
| AKR1C1           | aldo-keto reductase family 1  | chr10p15-p14          | retinoid metabolic process                   | ---                                         | 1.05          | 1.35      | -1.10     | -1.12      | -2.00      | -1.06      |
| AKR7A3           | aldo-keto reductase family 7  | chr1p36.13            | cellular aldehyde metabolic process          | ---                                         | 1.18          | 1.14      | -1.03     | 1.11       | -1.45      | -1.18      |
| ALDH3A2          | aldehyde dehydrogenase 3 fa   | chr17p11.2            | cellular aldehyde metabolic process          | ---                                         | -1.06         | 1.02      | 1.00      | -1.06      | -1.27      | -1.08      |
| ALDH5A1          | aldehyde dehydrogenase 5 fa   | chr6p22               | glucose metabolic process                    | ---                                         | 1.03          | 1.06      | -1.07     | -1.01      | -1.36      | 1.22       |
| AMOTL1           | angiominin like 1             | chr11q14.3            | establishment of cell polarity involved in a | ---                                         | -1.19         | -1.01     | -1.18     | 1.07       | 1.66       | -1.31      |
| ANGPTL4          | angiopoietin-like 4           | chr19p13.3            | angiogenesis                                 | ---                                         | -1.07         | 1.75      | -1.90     | 3.41       | -1.44      | -2.91      |
| ANGPTL4          | angiopoietin-like 4           | chr19p13.3            | angiogenesis                                 | ---                                         | 1.05          | -5.40     | 6.15      | 1.74       | -1.12      | -2.45      |
| ANK1             | ankyrin 1, erythrocytic       | chr8p11.1             | porphyrin-containing compound biosynthe      | ---                                         | 1.17          | -1.17     | 1.25      | -1.05      | -1.63      | 1.03       |
| ANKRD29          | ankyrin repeat domain 29      | chr18q11.2            | 0                                            | ---                                         | 1.10          | 1.21      | -1.88     | -1.22      | -3.21      | -1.08      |
| ANKRD37          | ankyrin repeat domain 37      | chr4q35.1             | 0                                            | ---                                         | 1.03          | -1.05     | 1.27      | 1.17       | -1.28      | -1.29      |
| ANXA3            | annexin A3                    | chr4q21.21            | phagocytosis                                 | Prostaglandin_synthesis_regulation // GenMA | 1.02          | -1.03     | 1.01      | 1.05       | 1.29       | 1.07       |
| AOC3             | amine oxidase, copper conta   | chr17q21              | inflammatory response                        | ---                                         | 1.30          | -1.14     | 1.21      | 1.59       | -1.36      | -1.46      |
| AQPEP            | laeverin                      | chr5q23.1             | proteolysis                                  | ---                                         | 1.02          | -2.69     | -2.28     | -1.09      | 2.67       | -1.59      |
| AREG /// AREGE   | amphiregulin /// amphiregul   | chr4q13.3             | epidermal growth factor receptor signalin    | ---                                         | -1.00         | 1.29      | 1.19      | -1.77      | 1.89       | 1.30       |
| ARHGAP8 /// PR   | Rho GTPase activating prote   | chr22q13 /// chr22q13 | signal transduction                          | ---                                         | 1.06          | 1.16      | -1.23     | 2.07       | -1.30      | 2.11       |
| ARHGEF10         | Rho guanine nucleotide excl   | chr8p23               | myelination in peripheral nervous system     | ---                                         | 1.02          | 1.59      | -1.05     | 1.24       | -1.93      | -1.45      |
| ARID2            | AT rich interactive domain 2  | chr12q12              | nucleosome disassembly                       | ---                                         | -1.00         | 1.07      | -1.02     | 1.08       | -1.18      | 1.40       |
| ARL3             | ADP-ribosylation factor-like  | chr10q23.3            | cytokinesis                                  | ---                                         | -1.09         | -1.14     | -1.29     | -1.27      | -1.04      | -1.08      |
| ARMC4            | armadillo repeat containing   | chr10p12.1-p11.23     | 0                                            | ---                                         | 2.01          | -1.14     | 1.80      | 1.35       | 2.26       | -1.41      |
| ART1             | ADP-ribosyltransferase 1      | chr11p15              | protein ADP-ribosylation                     | ---                                         | 1.10          | -2.04     | 1.24      | 1.15       | -1.60      | -1.39      |
| ASB9             | ankyrin repeat and SOCS bc    | chrXp22.2             | protein ubiquitination                       | ---                                         | -1.09         | -1.06     | -1.04     | -1.18      | -1.22      | -1.14      |
| ATP2B4           | ATPase, Ca++ transporting,    | chr1q32.1             | neural retina development                    | ---                                         | 1.09          | 1.02      | -1.16     | -1.09      | -1.49      | -1.19      |
| ATP2C1           | ATPase, Ca++ transporting,    | chr3q22.1             | ATP biosynthetic process                     | ---                                         | 1.03          | -1.00     | 1.01      | -1.01      | -1.14      | -1.02      |
| ATP7A            | ATPase, Cu++ transporting,    | chrXq21.1             | blood vessel development                     | ---                                         | -1.02         | 1.12      | 1.05      | 1.04       | -1.37      | -1.31      |
| ATRNL            | attractin                     | chr20p13              | inflammatory response                        | ---                                         | 1.01          | -1.03     | -1.04     | 1.04       | -1.36      | -1.01      |
| AURKA            | aurora kinase A               | chr20q13              | mitotic cell cycle                           | ---                                         | -1.06         | -1.05     | -1.04     | -1.09      | -1.01      | -1.08      |
| BACH1 /// GRIK   | BTB and CNC homology 1,       | chr21q22.11           | regulation of transcription involved in G1   | ---                                         | 1.01          | 1.03      | -1.62     | -1.41      | 2.21       | 1.75       |
| BARX2            | BARX homeobox 2               | chr11q25              | negative regulation of transcription from P  | ---                                         | 1.37          | 1.58      | -1.11     | 2.08       | 2.37       | 2.37       |
| BBS9             | Bardet-Biedl syndrome 9       | chr7p14               | visual perception                            | ---                                         | 1.07          | 1.13      | -1.04     | -1.07      | -1.31      | -1.06      |
| BCAR3            | breast cancer anti-estrogen r | chr1p22.1             | signal transduction                          | ---                                         | -1.01         | -1.02     | -1.05     | 1.19       | 1.37       | 1.24       |
| BCL2L1           | BCL2-like 1                   | chr20q11.21           | cytokinesis                                  | Apoptosis // GenMAPP /// Apoptosis_GenML    | -1.06         | -1.12     | 1.04      | 1.05       | 1.49       | -1.07      |
| BHLHE40          | basic helix-loop-helix family | chr3p26               | negative regulation of transcription from P  | ---                                         | -1.28         | -1.12     | 1.35      | 2.13       | 1.73       | 1.43       |
| BICC1            | bicaudal C homolog 1 (Dros    | chr10q21.1            | multicellular organismal development         | ---                                         | 1.01          | 1.04      | -1.19     | 1.06       | -1.02      | 2.00       |
| BRCC3            | BRCA1/BRCA2-containing        | chrXq28               | DNA repair                                   | ---                                         | 1.10          | -1.10     | 1.02      | -1.01      | -1.36      | -1.17      |
| BRCC3            | BRCA1/BRCA2-containing        | chrXq28               | DNA repair                                   | ---                                         | 1.04          | -1.05     | -1.01     | -1.05      | -1.41      | -1.13      |
| BRCC3            | BRCA1/BRCA2-containing        | chrXq28               | DNA repair                                   | ---                                         | 1.02          | -1.03     | -1.02     | -1.03      | -1.29      | -1.35      |
| BSPRY            | B-box and SPRY domain co      | chr9q32               | transport                                    | ---                                         | -2.02         | 3.91      | 1.20      | 1.52       | -2.23      | -1.88      |
| C10orf137        | chromosome 10 open readin     | chr10q26.13           | transcription, DNA-dependent                 | ---                                         | -1.07         | 1.09      | -1.06     | 1.55       | 1.53       | 1.61       |
| C11orf21         | chromosome 11 open readin     | chr11p15.5            | 0                                            | ---                                         | 2.55          | 3.96      | 2.78      | -1.04      | 5.85       | -3.12      |
| C12orf29         | chromosome 12 open readin     | chr12q21.32           | 0                                            | ---                                         | -1.09         | 1.29      | 1.03      | 1.02       | 1.36       | 1.37       |
| C17orf51         | chromosome 17 open readin     | chr17p11.2            | 0                                            | ---                                         | -1.51         | 1.09      | 1.21      | 1.02       | 2.23       | 1.22       |
| C1orf43          | chromosome 1 open reading     | chr1q21.2             | oxidation-reduction process                  | ---                                         | 1.05          | 1.03      | 1.03      | 1.15       | 1.18       | 1.48       |
| C1QL1            | complement component 1, c     | chr17q21              | locomotory behavior                          | ---                                         | 1.03          | -1.11     | -1.09     | 1.10       | -1.27      | -1.31      |
| C1QTNF1          | C1q and tumor necrosis fact   | chr17q25.3            | regulation of glucose metabolic process      | ---                                         | 1.12          | 1.20      | 1.55      | 1.26       | 1.55       | 1.15       |
| C4orf3           | chromosome 4 open reading     | chr4q26               | 0                                            | ---                                         | -1.00         | -1.16     | -1.15     | 1.05       | -1.17      | -1.53      |
| C4orf3           | chromosome 4 open reading     | chr4q26               | 0                                            | ---                                         | -1.03         | 1.16      | -1.02     | 1.19       | -1.42      | -1.32      |
| CABLES2          | Cdk5 and Abl enzyme subst     | chr20q13.33           | cell cycle                                   | ---                                         | 1.08          | -1.01     | 1.07      | 1.06       | -1.41      | -1.24      |
| CARHSP1          | calcium regulated heat stabl  | chr16p13.2            | regulation of transcription, DNA-depende     | ---                                         | 1.04          | -1.02     | -1.04     | 1.11       | -1.13      | -1.18      |
| CASK             | calcium/calmodulin-depend     | chrXp11.4             | negative regulation of cell-matrix adhesio   | ---                                         | -1.09         | 1.11      | -1.03     | -1.08      | -1.27      | -1.24      |
| CASP1            | caspase 1, apoptosis-related  | chr11q23              | response to hypoxia                          | Apoptosis // GenMAPP /// Apoptosis_KEGG     | 1.03          | 1.04      | 1.03      | 1.02       | 1.55       | 1.19       |
| CASP16           | caspase 16, apoptosis-relate  | chr16p13.3            | proteolysis                                  | ---                                         | -1.16         | -1.22     | -1.31     | -1.42      | -1.87      | -1.92      |
| CASP9            | caspase 9, apoptosis-related  | chr1p36.21            | proteolysis                                  | Apoptosis // GenMAPP /// Apoptosis_GenML    | 1.12          | 1.86      | -1.18     | -1.20      | 2.18       | -1.39      |
| CCDC132          | coiled-coil domain containin  | chr7q21.3             | 0                                            | ---                                         | -1.12         | 1.21      | 1.09      | -1.10      | -1.80      | 1.21       |
| CCDC168          | coiled-coil domain containin  | chr13q33.1            | 0                                            | ---                                         | -2.32         | 1.55      | -2.02     | -1.36      | 4.22       | -4.95      |
| CCL20            | chemokine (C-C motif) ligat   | chr2q36.3             | chemotaxis                                   | ---                                         | 4.03          | 1.08      | -2.85     | 1.47       | 3.34       | 3.25       |
| CCL5             | chemokine (C-C motif) ligat   | chr17q11.2-q12        | MAPK cascade                                 | ---                                         | -1.05         | -1.14     | 1.26      | 1.46       | 1.35       | 1.56       |
| CCL5             | chemokine (C-C motif) ligat   | chr17q11.2-q12        | MAPK cascade                                 | ---                                         | -1.22         | 1.02      | -1.00     | 1.44       | 1.94       | 1.53       |
| CCL5             | chemokine (C-C motif) ligat   | chr17q11.2-q12        | MAPK cascade                                 | ---                                         | -1.07         | -1.32     | -2.83     | 1.73       | 1.97       | 1.35       |
| CCNT2            | cyclin T2                     | chr2q21.3             | regulation of cyclin-dependent protein ser   | ---                                         | 1.15          | 1.15      | 1.24      | -1.06      | -1.32      | 1.39       |
| CD109            | CD109 molecule                | chr6q13               | negative regulation of peptidase activity    | ---                                         | 1.04          | -1.02     | 1.01      | 1.03       | -1.17      | -1.03      |
| CD274            | CD274 molecule                | chr9p24               | immune response                              | ---                                         | 1.10          | -2.04     | 1.77      | 1.22       | 1.40       | 2.11       |
| CDC42EP2         | CDC42 effector protein (Rh    | chr11q13              | actin filament organization                  | ---                                         | 1.08          | -1.12     | 1.18      | 1.07       | 1.72       | 1.07       |
| CDC47L           | cell division cycle associat  | chr7p15.3             | transcription, DNA-dependent                 | ---                                         | -1.05         | -1.06     | 1.02      | 1.09       | -1.07      | -1.09      |
| CDK19            | cyclin-dependent kinase 19    | chr6q21               | protein phosphorylation                      | ---                                         | 1.05          | 1.15      | 1.06      | -1.36      | -1.59      | -1.58      |
| CDON             | cell adhesion associated, onc | chr11q24.2            | cell fate specification                      | ---                                         | -1.10         | 1.15      | -1.12     | -1.15      | -1.65      | 1.14       |
| CDYL             | chromodomain protein, Y-li    | chr6p25.1             | transcription, DNA-dependent                 | ---                                         | 1.10          | -1.16     | 1.03      | 1.12       | 1.62       | 1.19       |
| CEACAM7          | carcinoembryonic antigen-re   | chr19q13.2            | 0                                            | ---                                         | 6.54          | -3.17     | 1.28      | -1.39      | 3.29       | -12.77     |
| CELF1            | CHUGBP, Elav-like family m    | chr11p11              | mRNA splice site selection                   | mRNA_processing_Reactome // GenMAPP         | -1.05         | -1.04     | 1.15      | 1.23       | -1.02      | 1.32       |
| CETP             | cholesteryl ester transfer pr | chr16q21              | lipid metabolic process                      | Statin_Pathway_PharmGKB // GenMAPP          | 1.22          | 1.28      | 3.11      | 1.15       | -1.45      | 1.12       |
| CGA              | glycoprotein hormones, alph   | chr6q12-q21           | thyroid hormone generation                   | ---                                         | 1.02          | -1.08     | 1.27      | 1.44       | 1.28       | 1.13       |
| CGB /// CGB5 /// | chorionic gonadotropin, beta  | chr19q13.32           | apoptotic process                            | ---                                         | -1.36         | 1.45      | -2.78     | -1.09      | 5.06       | 1.31       |
| CHRNA2           | cholinergic receptor, nicotin | chr1q21.3             | regulation of action potential               | ---                                         | -1.07         | -1.16     | 1.25      | -1.04      | 1.54       | 1.11       |

| ID              | Gene Title                     | Chromosomal Location | 1st Gene Ontology Biological Process        | Pathway                                     | A2497 30 mins | A2497 2 h | A2497 4 h | A2497 24 h | A2497 48 h | A2497 72 h |
|-----------------|--------------------------------|----------------------|---------------------------------------------|---------------------------------------------|---------------|-----------|-----------|------------|------------|------------|
| CLDN1           | claudin 1                      | chr3q28-q29          | cell adhesion                               | ---                                         | 1.04          | 1.03      | 1.06      | 1.36       | 1.37       | 1.13       |
| CLDN7           | claudin 7                      | ---                  | calcium-independent cell-cell adhesion      | ---                                         | 1.24          | 1.21      | 1.09      | -1.12      | -1.87      | -1.44      |
| CMBL            | carboxymethylenebutenolid      | chr5p15.2            | 0                                           | ---                                         | -1.02         | -1.01     | -1.03     | -1.02      | -1.18      | -1.07      |
| CNOT8           | CCR4-NOT transcription co      | chr5q31-q33          | nuclear-transcribed mRNA catabolic proc     | ---                                         | 1.00          | -1.01     | -1.22     | -1.11      | -1.59      | -1.12      |
| COL5A1          | collagen, type V, alpha 1      | chr9q34.2-q34.3      | blood vessel development                    | ---                                         | 1.06          | -1.09     | -1.00     | -1.02      | -1.00      | -1.27      |
| COL8A1          | collagen, type VIII, alpha 1   | chr3q12.3            | angiogenesis                                | ---                                         | -1.01         | 1.01      | -1.14     | 1.11       | 1.16       | 1.35       |
| COX5A           | cytochrome c oxidase subun     | chr15q24.1           | respiratory electron transport chain        | Electron_Transport_Chain // GenMAPP         | -1.06         | -1.03     | -1.03     | 1.05       | -1.01      | 1.03       |
| COX7B           | cytochrome c oxidase subun     | chrXq21.1            | central nervous system development          | Electron_Transport_Chain // GenMAPP         | -1.00         | 1.03      | 1.00      | -1.33      | -1.79      | -1.30      |
| CP              | ceruloplasmin (ferroxidase)    | chr3q23-q25          | transport                                   | ---                                         | 1.03          | -1.03     | 1.04      | 1.12       | -1.27      | -1.18      |
| CP              | ceruloplasmin (ferroxidase)    | chr3q23-q25          | transport                                   | ---                                         | 1.11          | -1.00     | -1.08     | 1.10       | -1.11      | -1.32      |
| CPEB2           | cytoplasmic polyadenylation    | chr4p15.33           | regulation of translation                   | ---                                         | -1.07         | -1.08     | 1.06      | 1.10       | 1.25       | 1.34       |
| CRABP2          | cellular retinoic acid binding | chr1q21.3            | regulation of transcription, DNA-depende    | ---                                         | 1.32          | 1.13      | 1.75      | 1.00       | -1.55      | -1.41      |
| CREG1           | cellular repressor of E1A-st   | chr1q24              | regulation of transcription, DNA-depende    | ---                                         | -1.07         | 1.00      | -1.03     | -1.06      | -1.24      | -1.07      |
| CREM            | cAMP responsive element n      | chr10p11.21          | glucose metabolic process                   | ---                                         | -1.02         | -1.09     | 1.24      | 1.36       | 1.53       | 1.01       |
| CSF1            | colony stimulating factor 1 (  | chr1p13.3            | ossification                                | ---                                         | -1.34         | -1.14     | -1.20     | 1.01       | 1.15       | -1.11      |
| CSF2            | colony stimulating factor 2 (  | chr5q31.1            | embryonic placenta development              | ---                                         | -2.66         | -3.14     | 1.13      | 1.38       | 1.63       | 11.45      |
| CSNK1E          | casein kinase 1, epsilon       | chr22q13.1           | G2                                          | Wnt_signaling // GenMAPP                    | 1.14          | 1.04      | 1.12      | 1.45       | 1.19       | -1.17      |
| CTB-31N19.3 /// | NULL ///                       | ---                  | 0                                           | ---                                         | 3.86          | -3.18     | 1.52      | -1.19      | -2.72      | 1.98       |
| CTTN            | cortactin                      | chr11q13             | 0                                           | ---                                         | 1.08          | 1.34      | 1.03      | 1.03       | 1.38       | 1.08       |
| CXCL1           | chemokine (C-X-C motif) li     | chr4q21              | chemotaxis                                  | ---                                         | -1.00         | -1.14     | -1.14     | 1.30       | 1.90       | 2.96       |
| CXCL10          | chemokine (C-X-C motif) li     | chr4q21              | positive regulation of leukocyte chemotax   | ---                                         | 1.26          | -2.67     | 2.30      | 1.56       | 1.97       | 2.60       |
| CXCL2           | chemokine (C-X-C motif) li     | chr4q21              | response to molecule of bacterial origin    | ---                                         | -1.12         | -1.06     | -1.25     | -1.04      | 1.66       | 2.25       |
| CXCL3           | chemokine (C-X-C motif) li     | chr4q21              | chemotaxis                                  | ---                                         | -1.39         | -1.06     | -1.07     | 1.18       | 1.64       | 2.63       |
| CYP20A1         | cytochrome P450, family 20     | chr2q33.2            | oxidation-reduction process                 | ---                                         | 1.17          | -1.04     | -1.07     | -1.13      | 1.20       | 1.11       |
| CYR61           | cysteine-rich, angiogenic ind  | chr1p22.3            | regulation of cell growth                   | Hypertrophy_model // GenMAPP                | 1.07          | -1.22     | 1.14      | 1.51       | 1.84       | 1.44       |
| CYR61           | cysteine-rich, angiogenic ind  | chr1p22.3            | regulation of cell growth                   | Hypertrophy_model // GenMAPP                | -1.01         | -1.07     | 1.25      | 1.57       | 2.03       | 1.60       |
| DACH2           | dachshund homolog 2 (Dros      | chrXq21.3            | transcription, DNA-dependent                | ---                                         | -1.06         | -1.36     | -1.19     | -1.71      | 4.65       | -1.06      |
| DAPK2           | death-associated protein kin   | chr15q22.31          | protein phosphorylation                     | ---                                         | -1.12         | 1.21      | -1.04     | -1.25      | -1.48      | -1.31      |
| DCN             | decorin                        | chr12q21.33          | kidney development                          | ---                                         | -1.04         | -1.13     | 1.31      | -1.24      | -1.09      | -1.76      |
| DDR1 ///        | discoidin domain receptor ty   | chr6p21.3            | regulation of cell growth                   | ---                                         | -1.01         | -1.06     | 1.05      | -1.00      | -1.35      | -1.27      |
| DDR1 ///        | discoidin domain receptor ty   | chr6p21.3            | regulation of cell growth                   | ---                                         | -1.03         | -1.04     | 1.11      | -1.00      | -1.36      | -1.22      |
| DDR1 ///        | discoidin domain receptor ty   | chr6p21.3            | regulation of cell growth                   | ---                                         | 1.04          | 1.01      | 1.01      | -1.12      | -1.33      | -1.12      |
| DDR1 ///        | discoidin domain receptor ty   | chr6p21.3            | regulation of cell growth                   | ---                                         | 1.13          | 1.02      | 1.05      | -1.03      | -1.30      | -1.24      |
| DDX28           | DEAD (Asp-Glu-Ala-Asp)         | chr16q22.1           | 0                                           | ---                                         | -1.01         | -1.10     | -1.02     | -1.09      | -1.01      | 1.08       |
| DDX58           | DEAD (Asp-Glu-Ala-Asp)         | chr9p12              | positive regulation of defense response to  | ---                                         | 1.17          | -1.10     | 1.30      | 1.51       | 1.75       | 1.34       |
| DDX60           | DEAD (Asp-Glu-Ala-Asp)         | chr4q32.3            | response to virus                           | ---                                         | 1.08          | 1.28      | 1.02      | 1.48       | 1.33       | 1.42       |
| DENND4C         | DENN/MADD domain cont          | chr9p22.1            | transport                                   | ---                                         | 1.01          | -1.03     | -1.22     | -1.02      | -1.30      | 1.02       |
| DGCR7           | DiGeorge syndrome critical     | chr22q11             | 0                                           | ---                                         | -1.03         | 1.68      | -1.13     | -1.61      | -2.13      | 1.20       |
| DGKE            | diacylglycerol kinase, epsilo  | chr17q22             | protein kinase C-activating G-protein cou   | ---                                         | 1.05          | -1.29     | -1.05     | 1.09       | 1.34       | 1.38       |
| DHFR            | dihydrofolate reductase        | chr5q11.2-q13.2      | G1                                          | Nucleotide_Metabolism // GenMAPP            | 1.08          | 1.01      | -1.10     | -1.02      | -1.29      | -1.20      |
| DHFR            | dihydrofolate reductase        | chr5q11.2-q13.2      | G1                                          | Nucleotide_Metabolism // GenMAPP            | 1.00          | -1.01     | 1.02      | 1.10       | -1.18      | -1.19      |
| DHX9            | DEAH (Asp-Glu-Ala-His) t       | chr1q25              | mRNA splicing, via spliceosome              | mRNA_processing_Reactome // GenMAPP         | -1.14         | -1.06     | -1.15     | -1.23      | -1.34      | 1.11       |
| DLGAP4          | discs, large (Drosophila) ho   | chr20q11.23          | cell-cell signaling                         | ---                                         | 1.09          | -1.16     | 1.15      | 1.35       | 1.85       | 1.09       |
| DMBT1           | deleted in malignant brain tu  | chr10q26.13          | blastocyst development                      | ---                                         | 1.02          | -1.42     | -1.01     | 1.16       | 1.75       | -1.18      |
| DNER            | delta/notch-like EGF repeat    | chr2q36.3            | neuron migration                            | ---                                         | -1.01         | 1.01      | -1.02     | 1.08       | 1.11       | 1.30       |
| DOCK10          | dedicator of cytokinesis 10    | chr2q36.2            | small GTPase mediated signal transductio    | ---                                         | -1.09         | 1.14      | -1.10     | -1.14      | 1.12       | 1.41       |
| DQX1            | DEAQ box RNA-dependent         | chr2p13.1            | 0                                           | ---                                         | -2.37         | -1.65     | 1.19      | -2.15      | 5.66       | 1.20       |
| DSC2            | desmocollin 2                  | chr18q12.1           | cell adhesion                               | ---                                         | 1.03          | -1.06     | 1.18      | -1.12      | -1.26      | -1.19      |
| DVL3            | dishevelled segment polarity   | chr3q27              | positive regulation of protein phosphoryla  | Wnt_signaling // GenMAPP                    | 1.08          | 1.07      | -1.10     | 1.01       | -1.20      | -1.21      |
| EDN1            | endothelin 1                   | chr6p24.1            | negative regulation of transcription from R | Prostaglandin_synthesis_regulation // GenMA | -1.55         | 1.02      | 1.23      | -1.11      | 1.89       | 1.55       |
| EDN2            | endothelin 2                   | chr1p34              | prostaglandin biosynthetic process          | ---                                         | 1.18          | -1.14     | -1.31     | -1.31      | -1.82      | -1.38      |
| EEF2K           | eukaryotic elongation factor   | chr16p12.2           | translational elongation                    | Translation_Factors // GenMAPP              | 1.11          | 1.11      | -1.21     | -1.38      | -1.48      | -1.10      |
| EEF2K ///       | eukaryotic elongation factor   | chr16p12.2           | translational elongation                    | Translation_Factors // GenMAPP              | -1.09         | 1.17      | 1.08      | 1.02       | -1.51      | -1.18      |
| EGLN1           | egl nine homolog 1 (C. eleg    | chr1q42.1            | response to hypoxia                         | ---                                         | -1.00         | -1.05     | -1.11     | 1.05       | -1.27      | -1.10      |
| EGLN3           | egl nine homolog 3 (C. eleg    | chr14q13.1           | response to hypoxia                         | ---                                         | 1.00          | 1.07      | -1.39     | -1.20      | -1.70      | -1.37      |
| EGR1            | early growth response 1        | chr5q31.1            | negative regulation of transcription from R | Ovarian_Infertility_Genes // GenMAPP        | 1.02          | -1.03     | -1.08     | 1.65       | 1.15       | 1.24       |
| EGR1            | early growth response 1        | chr5q31.1            | negative regulation of transcription from R | ---                                         | -1.06         | -1.07     | 1.07      | 1.78       | 1.04       | 1.24       |
| EHF             | ets homologous factor          | chr11p12             | transcription, DNA-dependent                | ---                                         | -1.02         | 1.17      | 1.03      | 1.20       | 1.53       | 1.16       |
| EIF2B5          | eukaryotic translation initiat | chr3q27.1            | ovarian follicle development                | Translation_Factors // GenMAPP              | 1.15          | 1.24      | 1.02      | -1.11      | 1.10       | -1.03      |
| EIF4EBP2        | eukaryotic translation initiat | chr10q21-q22         | translation                                 | Translation_Factors // GenMAPP              | -1.04         | 1.02      | -1.25     | -1.33      | -1.41      | -1.32      |
| EIF5            | eukaryotic translation initiat | chr14q32.32          | GTP catabolic process                       | Translation_Factors // GenMAPP              | -1.06         | 1.00      | 1.01      | -1.05      | 1.20       | -1.00      |
| EIF5            | eukaryotic translation initiat | chr14q32.32          | GTP catabolic process                       | Translation_Factors // GenMAPP              | -1.04         | -1.00     | 1.10      | -1.08      | 1.28       | -1.01      |
| ELF3            | E74-like factor 3 (ets domai   | chr1q32.2            | blastocyst development                      | ---                                         | -1.01         | -1.16     | -1.00     | -1.36      | -1.70      | -1.10      |
| ELF3            | E74-like factor 3 (ets domai   | chr1q32.2            | blastocyst development                      | ---                                         | -1.04         | -1.11     | -1.00     | -1.13      | -1.69      | -1.03      |
| ELK4            | ELK4, ETS-domain protein       | chr1q32              | negative regulation of transcription from R | ---                                         | 1.12          | 1.37      | -1.00     | -1.09      | 1.21       | 1.63       |
| ELL2            | elongation factor, RNA poly    | chr5q15              | transcription, DNA-dependent                | ---                                         | 1.07          | 1.11      | -1.02     | 1.68       | 1.23       | 1.21       |
| ENO2            | enolase 2 (gamma, neuronal     | chr12p13             | carbohydrate metabolic process              | Glycolysis_and_Gluconeogenesis // GenMAP    | -1.08         | 1.17      | 1.15      | 1.13       | -1.11      | -1.30      |
| EPM2AIP1        | EPM2A (laforin) interacting    | chr3p22.1            | 0                                           | ---                                         | -1.02         | -1.06     | -1.00     | -1.09      | -1.28      | -1.12      |
| EPM2AIP1        | EPM2A (laforin) interacting    | chr3p22.1            | 0                                           | ---                                         | 1.13          | -1.08     | -1.14     | -1.07      | -1.37      | 1.02       |
| EQTN            | equatorin, sperm acrosome a    | chr9p21              | endocytosis                                 | ---                                         | -4.16         | 6.88      | 1.05      | -3.31      | 1.89       | -1.12      |
| ERBB4           | v-erb-a erythroblastic leuk    | chr2q33.3-q34        | neural crest cell migration                 | ---                                         | 1.13          | -1.01     | 1.22      | -1.25      | -2.12      | 1.31       |
| ERCC6L2         | excision repair cross-comple   | chr9q22.32           | DNA repair                                  | ---                                         | 1.04          | 1.04      | 1.12      | -1.13      | -1.23      | 1.03       |
| ERO1L           | ERO1-like (S. cerevisiae)      | chr14q22.1           | protein folding                             | ---                                         | -1.08         | 1.01      | -1.03     | 1.17       | -1.16      | -1.08      |
| ETNK1           | ethanolamine kinase 1          | chr12p12.1           | lipid metabolic process                     | ---                                         | 1.03          | 1.07      | -1.19     | 1.11       | -1.05      | 1.46       |
| EVL             | Enah/Vasp-like                 | chr14q32.2           | actin filament organization                 | ---                                         | -1.08         | 1.11      | -1.07     | -1.00      | 1.15       | -1.26      |
| F11R            | F11 receptor                   | chr1q21.2-q21.3      | inflammatory response                       | ---                                         | 1.28          | -1.03     | -1.04     | 1.13       | -1.30      | -1.00      |
| FAM110B         | family with sequence simila    | chr8q12.1            | 0                                           | ---                                         | 1.07          | -1.02     | 1.08      | -1.32      | -1.67      | -1.32      |
| FAM110C         | family with sequence simila    | chr2p25.3            | positive regulation of cell migration       | ---                                         | -1.02         | 1.00      | 1.04      | 1.06       | -1.47      | -1.22      |
| FAM13A          | family with sequence simila    | chr4q22.1            | signal transduction                         | ---                                         | 1.03          | -1.01     | 1.06      | -1.12      | -1.55      | -1.31      |
| FAM13A          | family with sequence simila    | chr4q22.1            | signal transduction                         | ---                                         | 1.11          | -1.00     | 1.12      | -1.15      | -1.65      | -1.31      |
| FAM13A-AS1      | FAM13A antisense RNA 1         | chr4q22.1            | 0                                           | ---                                         | 1.23          | -1.04     | -1.22     | 1.04       | -1.63      | -1.35      |
| FAM162A         | family with sequence simila    | chr3q21.1            | apoptotic process                           | ---                                         | 1.01          | -1.07     | 1.04      | 1.08       | 1.10       | -1.17      |
| FAM172A         | family with sequence simila    | chr5q15              | 0                                           | ---                                         | 1.05          | 1.02      | 1.04      | -1.18      | -1.53      | 1.02       |
| FAM179B         | family with sequence simila    | chr14q21.2           | 0                                           | ---                                         | 1.05          | 1.02      | 1.02      | 1.06       | -1.46      | 1.14       |
| FAM46C          | family with sequence simila    | chr1p12              | 0                                           | ---                                         | -1.31         | 1.00      | -2.11     | 1.24       | -1.49      | -1.42      |
| FAS             | Fas cell surface death recept  | chr10q24.1           | response to hypoxia                         | Apoptosis // GenMAPP /// Apoptosis_GenM     | 1.03          | 1.10      | 1.10      | 1.07       | 1.18       | 1.32       |
| FBP2            | fructose-1,6-bisphosphatase    | chr9q22.3            | carbohydrate metabolic process              | Glycolysis_and_Gluconeogenesis // GenMAP    | 2.07          | -1.30     | -1.81     | 2.16       | 3.70       | 3.01       |

| ID                      | Gene Title                                                  | Chromosomal Location      | 1st Gene Ontology Biological Process                                    | Pathway                                       | A2497 30 mins | A2497 2 h | A2497 4 h | A2497 24 h | A2497 48 h | A2497 72 h |
|-------------------------|-------------------------------------------------------------|---------------------------|-------------------------------------------------------------------------|-----------------------------------------------|---------------|-----------|-----------|------------|------------|------------|
| FGD4                    | FYVE, RhoGEF and PH domain containing 4                     | chr12p11.21               | apoptotic process                                                       | ---                                           | 1.10          | -1.15     | -1.15     | -1.16      | -1.25      | -1.09      |
| FGF11                   | fibroblast growth factor 11                                 | chr17p13.1                | signal transduction                                                     | ---                                           | 1.06          | 1.08      | 1.01      | 1.12       | -1.16      | -1.46      |
| FLJ44896                | FLJ44896 protein                                            | chr5p15.33                | 0                                                                       | ---                                           | 1.03          | 1.27      | -1.08     | -1.24      | -1.28      | -1.57      |
| FLRT2 /// LOC100287502  | fibronectin leucine rich transmembrane protein 2            | chr14q24-q32              | cell adhesion                                                           | ---                                           | -1.01         | 1.02      | -1.09     | -1.21      | -1.69      | 1.13       |
| FOPNL                   | FGFR1OP N-terminal like                                     | chr16p13.11               | cell projection organization                                            | ---                                           | -1.10         | 1.29      | 1.21      | 1.00       | 1.08       | 1.41       |
| FOXC1                   | forkhead box C1                                             | chr6p25                   | negative regulation of transcription from RNA polymerase II promoter    | ---                                           | -1.00         | -1.03     | 1.25      | -1.03      | 1.63       | -1.13      |
| FOXE1                   | forkhead box E1 (thyroid transcription factor 1)            | chr9q22                   | negative regulation of transcription from RNA polymerase II promoter    | ---                                           | 1.02          | -1.15     | -1.01     | -1.06      | 1.41       | 1.01       |
| FOXN3                   | forkhead box N3                                             | chr14q31.3                | DNA damage checkpoint                                                   | ---                                           | -1.02         | -1.07     | 1.03      | 1.08       | -1.18      | -1.20      |
| FOXRED2                 | FAD-dependent oxidoreductase 2                              | chr22q12.3                | ER-associated protein catabolic process                                 | ---                                           | -1.18         | 1.16      | 1.26      | -1.42      | -1.19      | -1.17      |
| FOXRED2                 | FAD-dependent oxidoreductase 2                              | chr22q12.3                | ER-associated protein catabolic process                                 | ---                                           | -1.06         | 1.20      | 1.30      | 1.09       | -1.11      | 1.26       |
| FPR1                    | formyl peptide receptor 1                                   | chr19q13.4                | activation of MAPK activity                                             | GPCRDB_Class_A_Rhodopsin-like // GenMAPP      | -1.18         | 1.04      | -3.21     | 1.40       | 3.82       | 2.78       |
| FSTL1                   | folliculin-like 1                                           | chr3q13.33                | BMP signaling pathway                                                   | ---                                           | -1.04         | 1.01      | 1.08      | 1.07       | 1.07       | 1.16       |
| FUCA1                   | fucosidase, alpha-L-1, tissue                               | chr1p34                   | carbohydrate metabolic process                                          | ---                                           | -1.01         | 1.00      | -1.05     | -1.04      | -1.42      | -1.17      |
| FUT11                   | fucosyltransferase 11 (alpha-1,3-fucosyltransferase)        | chr10q22.2                | protein glycosylation                                                   | ---                                           | 1.10          | 1.20      | 1.24      | -1.15      | -1.33      | -1.47      |
| FZD2                    | frizzled family receptor 2                                  | chr17q21.1                | vasculature development                                                 | Wnt_signaling // GenMAPP                      | -1.06         | 1.12      | -1.03     | -1.65      | -1.21      | 1.06       |
| G0S2                    | G0/G1 switch 2                                              | chr1q32.2                 | apoptotic process                                                       | Circadian_Exercise // GenMAPP                 | 1.07          | -1.11     | 1.01      | 1.02       | 1.48       | 1.32       |
| G6PC3                   | glucose 6 phosphatase, catalytic                            | chr17q21.31               | carbohydrate metabolic process                                          | ---                                           | 1.02          | -1.04     | 1.01      | 1.05       | -1.16      | -1.16      |
| GADD45B                 | growth arrest and DNA-damage-inducible 45B                  | chr19p13.3                | activation of MAPKKK activity                                           | ---                                           | 1.10          | -1.13     | 1.14      | -1.03      | 1.39       | 1.45       |
| GADD45B                 | growth arrest and DNA-damage-inducible 45B                  | chr19p13.3                | activation of MAPKKK activity                                           | ---                                           | 1.09          | -1.06     | 1.18      | 1.24       | 1.38       | 1.59       |
| GADD45B                 | growth arrest and DNA-damage-inducible 45B                  | chr19p13.3                | activation of MAPKKK activity                                           | ---                                           | 1.10          | 1.01      | 1.18      | -1.03      | 1.60       | 1.83       |
| GBP1                    | guanylate binding protein 1, cytosolic                      | chr1p22.2                 | GTP catabolic process                                                   | ---                                           | 1.00          | -1.01     | 1.10      | 1.00       | 1.37       | 1.30       |
| GBX2                    | gastrulation brain homeobox 2                               | chr2q37.2                 | patterning of blood vessels                                             | ---                                           | -1.75         | -1.26     | -2.33     | -1.23      | 4.42       | 2.46       |
| GCFC2                   | GC-rich sequence DNA-binding protein 2                      | chr2p12                   | transcription, DNA-dependent                                            | ---                                           | 1.01          | -1.01     | -1.27     | -1.14      | -1.16      | 1.16       |
| GDA                     | guanine deaminase                                           | chr9q21.13                | nucleobase-containing compound metabolic process                        | ---                                           | -1.05         | -1.11     | 1.01      | -1.12      | 1.95       | 1.33       |
| GDA                     | guanine deaminase                                           | chr9q21.13                | nucleobase-containing compound metabolic process                        | ---                                           | -1.09         | -1.07     | 1.03      | -1.02      | 1.17       | 1.20       |
| GDAP1                   | ganglioside induced differentially expressed protein 1      | chr8q21.11                | mitochondrial fission                                                   | ---                                           | -1.02         | 1.03      | -1.03     | 1.04       | -1.28      | 1.61       |
| GLUL                    | glutamate-ammonia ligase                                    | chr1q31                   | neurotransmitter uptake                                                 | ---                                           | 1.07          | 1.03      | 1.09      | 1.07       | 1.41       | 1.16       |
| GNAS                    | GNAS complex locus                                          | chr20q13.3                | skeletal system development                                             | ---                                           | -1.04         | -1.39     | -1.09     | -1.06      | -1.18      | -1.06      |
| GOSR2                   | golgi SNAP receptor complex member 2                        | chr17q21                  | transport                                                               | ---                                           | 1.93          | -1.11     | 1.21      | -1.24      | 1.49       | -1.03      |
| GPATCH2                 | G patch domain containing 2                                 | chr1q41                   | negative regulation of phosphatase activity                             | ---                                           | -1.10         | 1.14      | 1.02      | -1.72      | -1.17      | 1.69       |
| GPATCH2                 | G patch domain containing 2                                 | chr1q41                   | negative regulation of phosphatase activity                             | ---                                           | -1.09         | 1.05      | -1.13     | -1.05      | -1.09      | 1.76       |
| GNPMB                   | glycoprotein (transmembrane protein)                        | chr7p15                   | osteoblast differentiation                                              | ---                                           | -1.05         | 1.03      | 1.02      | 1.08       | -1.33      | -1.29      |
| GRB10                   | growth factor receptor-bound protein 10                     | chr7p12.2                 | signal transduction                                                     | ---                                           | 1.11          | 1.02      | 1.03      | 1.47       | -1.10      | -1.50      |
| GSTA4                   | glutathione S-transferase alpha 4                           | chr6p12.1                 | glutathione metabolic process                                           | ---                                           | 1.04          | -1.02     | 1.10      | -1.09      | -1.42      | -1.26      |
| GSTM5                   | glutathione S-transferase mu 5                              | chr1p13.3                 | glutathione metabolic process                                           | ---                                           | 1.52          | -1.08     | -1.28     | 1.09       | -1.13      | -1.70      |
| GTDC1                   | glycosyltransferase-like domain containing 1                | chr2q22.3                 | biosynthetic process                                                    | ---                                           | -1.22         | -1.15     | 1.88      | 1.07       | -2.16      | -1.63      |
| H19 /// MIR675          | H19, imprinted maternally expressed transcript              | chr11p15.5                | 0                                                                       | ---                                           | -1.09         | -1.01     | 1.10      | 1.05       | 1.14       | -1.35      |
| HERC5                   | HECT and RLD domain containing 5                            | chr4q22.1                 | regulation of cyclin-dependent protein serine/threonine kinase activity | ---                                           | -1.03         | 1.18      | 1.03      | 1.31       | 1.39       | 1.57       |
| HEY1                    | hair/enhancer-of-split related protein 1                    | chr8q21                   | negative regulation of transcription from RNA polymerase II promoter    | ---                                           | 1.02          | 1.04      | 1.09      | 1.23       | -1.56      | 1.01       |
| HIGD1B                  | HIG1 hypoxia inducible domain containing 1B                 | chr17q21.31               | 0                                                                       | ---                                           | -2.27         | 3.34      | -3.15     | -1.77      | 1.56       | 1.69       |
| HILPDA                  | hypoxia inducible lipid droplet protein                     | chr7q32.1                 | positive regulation of cytokine production                              | ---                                           | 1.01          | 1.03      | 1.05      | 1.06       | -1.42      | -1.59      |
| HILPDA                  | hypoxia inducible lipid droplet protein                     | chr7q32.1                 | positive regulation of cytokine production                              | ---                                           | 1.04          | 1.25      | 1.01      | 1.41       | -1.61      | -1.63      |
| HIST1H2AC               | histone cluster 1, H2ac                                     | chr6p22.1                 | nucleosome assembly                                                     | ---                                           | -1.01         | -1.03     | -1.02     | 1.01       | -1.23      | 1.00       |
| HIST1H2AG /// HIST1H2AC | histone cluster 1, H2ag                                     | chr6p21.33 /// chr6p22.1  | nucleosome assembly                                                     | ---                                           | -1.04         | -1.08     | 1.03      | -1.22      | -1.45      | 1.03       |
| HNRNPA3                 | heterogeneous nuclear ribonucleoprotein A3                  | chr2q31.2                 | mRNA splicing, via spliceosome                                          | mRNA_processing_Reactome // GenMAPP           | -1.04         | -1.05     | -1.05     | -1.07      | -1.23      | -1.01      |
| HNRNPA3 /// HNRNP35     | heterogeneous nuclear ribonucleoprotein A3                  | chr10q11.21 /// chr2q31.2 | mRNA splicing, via spliceosome                                          | mRNA_processing_Reactome // GenMAPP           | -1.08         | -1.03     | -1.04     | -1.02      | -1.26      | -1.01      |
| HOXA13                  | homeobox A13                                                | chr7p15.2                 | skeletal system development                                             | ---                                           | -1.04         | -1.10     | -1.00     | -1.26      | -1.56      | 1.29       |
| HOXD10                  | homeobox D10                                                | chr2q31.1                 | skeletal system development                                             | ---                                           | -1.69         | -1.76     | 1.59      | -1.14      | -2.27      | -1.14      |
| HOXD-AS1                | HOXD cluster antisense RNA 1                                | chr2q31.2                 | 0                                                                       | ---                                           | 1.78          | 1.26      | -2.86     | -1.18      | -1.19      | 13.43      |
| HPCAL1                  | hippocalcin-like 1                                          | chr2p25.1                 | signal transduction                                                     | ---                                           | 1.18          | -1.29     | -1.08     | 1.04       | -1.09      | -1.34      |
| HPGD                    | hydroxyprostaglandin dehydrogenase                          | chr4q34-q35               | lipid metabolic process                                                 | Prostaglandin_synthesis_regulation // GenMAPP | -1.10         | 1.04      | -1.07     | -1.04      | -1.75      | -1.63      |
| HPGD                    | hydroxyprostaglandin dehydrogenase                          | chr4q34-q35               | lipid metabolic process                                                 | Prostaglandin_synthesis_regulation // GenMAPP | -1.15         | 1.02      | -1.02     | -1.33      | -2.04      | -1.23      |
| HRR                     | histidine-rich glycoprotein                                 | chr3q27                   | angiogenesis                                                            | ---                                           | 1.18          | 1.78      | 6.50      | 1.05       | 3.90       | 2.72       |
| HSD17B14                | hydroxysteroid (17-beta) dehydrogenase 14                   | chr19q13.33               | lipid metabolic process                                                 | ---                                           | -1.04         | -1.31     | -1.96     | -1.02      | -1.44      | 1.13       |
| HSPA6                   | heat shock 70kDa protein 6                                  | chr1q23                   | cell morphogenesis                                                      | ---                                           | 1.05          | -1.16     | -1.34     | -1.55      | 2.96       | 1.61       |
| HSPA6                   | heat shock 70kDa protein 6                                  | chr1q23                   | cell morphogenesis                                                      | ---                                           | -1.09         | -1.16     | -1.47     | -1.64      | 3.07       | 1.73       |
| HTATIP2                 | HIV-1 Tat interactive protein 2                             | chr11p15.1                | angiogenesis                                                            | ---                                           | -1.06         | -1.03     | 1.01      | -1.06      | -1.01      | -1.03      |
| HTR2C                   | 5-hydroxytryptamine (serotonin) receptor 2C                 | chrXq24                   | behavioral fear response                                                | GPCRDB_Class_A_Rhodopsin-like // GenMAPP      | -1.57         | -1.87     | -3.24     | -7.84      | 1.35       | -1.54      |
| HYI                     | hydroxypyruvate isomerase                                   | chr1p34.2                 | 0                                                                       | ---                                           | 1.02          | -1.28     | 1.09      | -1.08      | 1.76       | -1.01      |
| HYI                     | hydroxypyruvate isomerase                                   | chr1p34.2                 | 0                                                                       | ---                                           | 1.00          | -1.11     | 1.06      | -1.03      | 1.74       | 1.00       |
| HYI                     | hydroxypyruvate isomerase                                   | chr1p34.2                 | 0                                                                       | ---                                           | 1.04          | 1.01      | 1.09      | -1.02      | 1.56       | 1.04       |
| HYPK /// MIR128         | huntingtin interacting protein                              | chr15q15.3                | lipid metabolic process                                                 | ---                                           | -1.04         | 1.08      | 1.32      | -1.18      | -1.13      | -1.74      |
| ICAM1                   | intercellular adhesion molecule 1                           | chr19p13.3-p13.2          | ovarian follicle development                                            | ---                                           | 1.09          | 1.03      | -1.05     | 1.11       | 1.62       | 1.01       |
| IER5                    | immediate early response 5                                  | chr1q25.3                 | 0                                                                       | ---                                           | 1.03          | -1.04     | -1.17     | -1.00      | 1.32       | 1.16       |
| IFI6                    | interferon, alpha-inducible protein 6                       | chr1p35                   | release of cytochrome c from mitochondria                               | ---                                           | 1.05          | 1.43      | 1.03      | 1.02       | 2.35       | 2.45       |
| IFIH1                   | interferon induced with helicase/uracil DNA glycosylase 1   | chr2q24                   | detection of virus                                                      | ---                                           | 1.10          | -1.36     | 1.06      | 1.17       | 1.92       | 1.17       |
| IFIT1                   | interferon-induced protein with tetratricopeptide repeats 1 | chr10q23.31               | response to virus                                                       | ---                                           | 1.04          | -1.02     | 1.07      | 1.30       | 1.17       | 1.59       |
| IFIT2                   | interferon-induced protein with tetratricopeptide repeats 2 | chr10q23.31               | apoptotic process                                                       | ---                                           | -1.19         | 1.19      | -1.90     | 1.26       | 1.43       | 1.68       |
| IFIT2                   | interferon-induced protein with tetratricopeptide repeats 2 | chr10q23.31               | apoptotic process                                                       | ---                                           | 1.03          | -1.05     | 1.10      | 1.14       | 1.11       | 1.59       |
| IFIT3                   | interferon-induced protein with tetratricopeptide repeats 3 | chr10q24                  | negative regulation of cell proliferation                               | ---                                           | -1.05         | 1.15      | 1.14      | 1.58       | 1.56       | 1.09       |
| IFIT3                   | interferon-induced protein with tetratricopeptide repeats 3 | chr10q24                  | negative regulation of cell proliferation                               | ---                                           | 1.06          | -1.04     | 1.01      | 1.26       | 1.36       | 1.50       |
| IFNAR1                  | interferon (alpha, beta and gamma) receptor 1               | chr21q22.11               | cell surface receptor signaling pathway                                 | ---                                           | 1.04          | 1.02      | 1.02      | -1.06      | -1.40      | 1.07       |
| IGFBP3                  | insulin-like growth factor binding protein 3                | chr7p13-p12               | regulation of cell growth                                               | Smooth_muscle_contraction // GenMAPP          | 1.07          | 1.05      | -1.01     | 1.17       | -1.31      | -1.41      |
| IGFBP3                  | insulin-like growth factor binding protein 3                | chr7p13-p12               | regulation of cell growth                                               | Smooth_muscle_contraction // GenMAPP          | -1.02         | -1.06     | -1.03     | 1.10       | -1.05      | -1.28      |
| IGLJ3                   | immunoglobulin lambda joining region 3                      | chr22q11.2                | 0                                                                       | ---                                           | 1.05          | 1.16      | -1.00     | -1.14      | -1.20      | 1.30       |
| IGSF10                  | immunoglobulin superfamily 10                               | chr3q25.1                 | ossification                                                            | ---                                           | -1.00         | 1.01      | 1.05      | 1.03       | -1.21      | -1.40      |
| IGSF10                  | immunoglobulin superfamily 10                               | chr3q25.1                 | ossification                                                            | ---                                           | -1.01         | -1.03     | -1.05     | -1.06      | -1.39      | -1.28      |
| IKZF2                   | IKAROS family zinc finger 2                                 | chr2q34                   | transcription, DNA-dependent                                            | ---                                           | 1.42          | 1.08      | -1.71     | -1.22      | 2.04       | 1.27       |
| IL10RA                  | interleukin 10 receptor, alpha                              | chr11q23                  | signal transduction                                                     | ---                                           | -1.46         | -1.06     | 1.41      | -1.09      | -1.49      | -1.79      |
| IL1A                    | interleukin 1, alpha                                        | chr2q14                   | fever generation                                                        | Hypertrophy_model // GenMAPP                  | 1.02          | -1.20     | -1.04     | 1.34       | 1.59       | 1.53       |
| IL20                    | interleukin 20                                              | chr1q32                   | positive regulation of tyrosine phosphorylation                         | ---                                           | 1.23          | -1.05     | -2.49     | 1.61       | 4.04       | 2.10       |
| IL24                    | interleukin 24                                              | chr1q32                   | apoptotic process                                                       | ---                                           | -1.15         | -1.39     | 1.08      | -1.08      | 1.99       | 2.11       |
| IL6                     | interleukin 6 (interferon, beta-inducing)                   | chr7p21                   | neutrophil apoptotic process                                            | Smooth_muscle_contraction // GenMAPP          | 1.62          | -1.02     | 1.02      | 2.19       | 2.45       | 2.64       |
| IL7R                    | interleukin 7 receptor                                      | chr5p13                   | regulation of DNA recombination                                         | ---                                           | -1.01         | 1.05      | -1.10     | 1.15       | 1.39       | 1.04       |
| IL8                     | interleukin 8                                               | chr4q13-q21               | angiogenesis                                                            | ---                                           | -1.55         | -1.33     | 1.29      | -1.14      | 1.81       | 2.81       |
| INA                     | internexin neuronal intermediate filament protein           | chr10q24.33               | multicellular organismal development                                    | ---                                           | 1.02          | 1.02      | 1.04      | 1.02       | -1.19      | -1.08      |
| INIP                    | NULL                                                        | ---                       | DNA repair                                                              | ---                                           | -1.06         | -1.06     | -1.05     | -1.02      | -1.27      | 1.09       |



| ID           | Gene Title                    | Chromosomal Location | 1st Gene Ontology Biological Process        | Pathway                                     | A2497 30 mins | A2497 2 h | A2497 4 h | A2497 24 h | A2497 48 h | A2497 72 h |
|--------------|-------------------------------|----------------------|---------------------------------------------|---------------------------------------------|---------------|-----------|-----------|------------|------------|------------|
| NREP         | neuronal regeneration relate  | chr5q22.1            | regulation of transforming growth factor b  | ---                                         | 1.03          | -1.05     | 1.02      | 1.01       | -1.20      | -1.17      |
| NREP         | neuronal regeneration relate  | chr5q22.1            | regulation of transforming growth factor b  | ---                                         | 1.04          | 1.24      | -1.00     | -1.03      | -1.63      | -1.20      |
| NRG4         | neuregulin 4                  | chr15q24.2           | epidermal growth factor receptor signaling  | ---                                         | -1.02         | 1.01      | 1.20      | -1.09      | -1.12      | -1.51      |
| NT5DC1       | 5'-nucleotidase domain cont   | chr6q22.1            | 0                                           | ---                                         | -1.03         | 1.01      | 1.05      | -1.00      | -1.22      | -1.00      |
| NUDT6        | nudix (nucleoside diphosph    | chr4q26              | 0                                           | ---                                         | 1.07          | 1.02      | 1.02      | 1.03       | 1.45       | 1.26       |
| NUP50        | nucleoporin 50kDa             | chr22q13.31          | mitotic cell cycle                          | ---                                         | 1.01          | -1.10     | 1.05      | 1.21       | 1.15       | 1.12       |
| NUP98        | nucleoporin 98kDa             | chr11p15.5           | protein import into nucleus, docking        | ---                                         | 1.01          | 1.16      | 1.04      | -1.11      | 2.01       | -1.14      |
| OAS2         | 2'-5'-oligoadenylate syntheta | chr12q24.2           | nucleobase-containing compound metabo       | ---                                         | 1.02          | -1.05     | 1.15      | 1.28       | 2.13       | 2.08       |
| OAS2         | 2'-5'-oligoadenylate syntheta | chr12q24.2           | nucleobase-containing compound metabo       | ---                                         | -1.07         | -1.14     | 1.45      | 1.26       | 1.07       | 2.04       |
| OASL         | 2'-5'-oligoadenylate syntheta | chr12q24.2           | immune response                             | ---                                         | -1.03         | -1.15     | -1.02     | 1.51       | 1.60       | 1.44       |
| OASL         | 2'-5'-oligoadenylate syntheta | chr12q24.2           | immune response                             | ---                                         | 1.01          | -1.30     | 1.02      | 1.65       | 1.48       | 1.30       |
| ORAI3        | ORAI calcium release-activ    | chr16p11.2           | 0                                           | ---                                         | 1.15          | -1.01     | 1.05      | 1.16       | -1.11      | -1.32      |
| OTTHUMG0000  | NULL /// NULL                 | ---                  | 0                                           | ---                                         | -1.02         | -1.05     | -1.06     | -1.07      | -1.31      | -1.10      |
| OTTHUMG0000  | NULL /// NULL                 | ---                  | 0                                           | ---                                         | -1.42         | -1.47     | -2.67     | -3.42      | 2.37       | 1.58       |
| OTTHUMG0000  | NULL /// NULL                 | ---                  | 0                                           | ---                                         | 3.14          | 1.30      | 2.20      | -5.04      | 2.80       | -1.33      |
| OTTHUMG0000  | NULL /// NULL                 | ---                  | 0                                           | ---                                         | 1.15          | 1.07      | 1.24      | 1.24       | 2.47       | 1.21       |
| OTTHUMG0000  | NULL /// NULL                 | ---                  | 0                                           | ---                                         | 1.10          | 1.03      | -1.50     | -1.50      | -1.19      | -1.42      |
| OTTHUMG0000  | NULL /// NULL                 | ---                  | 0                                           | ---                                         | -1.21         | -1.55     | -1.26     | 1.57       | 4.19       | -1.56      |
| OTTHUMG0000  | NULL /// NULL                 | ---                  | 0                                           | ---                                         | -1.24         | -1.78     | -3.07     | 1.41       | -2.95      | -1.03      |
| OTTHUMG0000  | NULL /// NULL                 | ---                  | 0                                           | ---                                         | -2.11         | -1.18     | -2.58     | -1.02      | 1.44       | 1.90       |
| OXCT1        | 3-oxoacid CoA transferase 1   | chr5p13.1            | brain development                           | Synthesis_and_Degradation_of_Keton_Bodie    | -1.03         | -1.02     | -1.02     | -1.06      | -1.19      | -1.05      |
| P2RX5-TAX1BP | P2RX5-TAX1BP3 readthro        | chr17p /// chr17p13  | ion transport                               | ---                                         | -1.09         | 1.10      | 1.16      | -1.02      | 1.15       | 1.18       |
| PANK1        | pantothenate kinase 1         | chr10q23.31          | vitamin metabolic process                   | ---                                         | 1.17          | -1.01     | -1.11     | -1.16      | -1.39      | 1.25       |
| PANK2        | pantothenate kinase 2         | chr20p13             | vitamin metabolic process                   | ---                                         | -1.01         | -1.00     | -1.05     | 1.16       | 1.11       | 1.47       |
| PAPLN        | papilin, proteoglycan-like su | chr14q24.2           | negative regulation of peptidase activity   | ---                                         | -1.04         | -1.12     | -1.11     | 1.12       | -1.37      | -1.20      |
| PAPPA2       | pappalysin 2                  | chr1q23-q25          | regulation of cell growth                   | ---                                         | -2.03         | 3.49      | -3.74     | 4.91       | 9.60       | -3.41      |
| PARD3B       | par-3 partitioning defective  | chr2q33.3            | cell cycle                                  | ---                                         | -1.06         | 1.49      | 1.00      | 1.09       | -1.52      | 1.42       |
| PARP12       | poly (ADP-ribose) polymera    | chr7q34              | 0                                           | ---                                         | 1.01          | -1.00     | 1.11      | -1.02      | 1.28       | -1.05      |
| PCDH1        | protocadherin 1               | chr5q31.3            | cell adhesion                               | ---                                         | -2.01         | -1.46     | -1.61     | -1.13      | -4.39      | -3.19      |
| PCDH7        | protocadherin 7               | chr4p15              | cell adhesion                               | ---                                         | -1.01         | -1.25     | 1.11      | -1.10      | -1.26      | -1.04      |
| PCYOX1       | prenylcysteine oxidase 1      | chr2p13.3            | chloride transport                          | ---                                         | 1.04          | -1.08     | -1.07     | -1.23      | -1.18      | -1.25      |
| PDCD2L       | programmed cell death 2-lik   | chr19q13.11          | cell cycle                                  | ---                                         | -1.01         | -1.04     | 1.20      | 1.12       | 1.40       | -1.01      |
| PDE1A        | phosphodiesterase 1A, calm    | chr2q32.1            | signal transduction                         | G_Protein_Signaling // GenMAPP              | -1.13         | -1.07     | -1.16     | -1.02      | -1.75      | -1.54      |
| PDE1A        | phosphodiesterase 1A, calm    | chr2q32.1            | protein targeting to Golgi                  | G_Protein_Signaling // GenMAPP              | 1.15          | 1.05      | -1.13     | -1.09      | -1.85      | -1.37      |
| PDE3B        | phosphodiesterase 3B, cGM     | chr11p15.1           | angiogenesis                                | ---                                         | 1.10          | 1.03      | -1.09     | -1.08      | -1.44      | -1.30      |
| PDE8B        | phosphodiesterase 8B          | chr5q13.3            | phosphorelay signal transduction system     | G_Protein_Signaling // GenMAPP              | -1.00         | 1.03      | 1.03      | 1.15       | -1.47      | -1.10      |
| PDGFC        | platelet derived growth facto | chr4q32              | activation of transmembrane receptor prot   | ---                                         | 1.06          | 1.00      | -1.04     | -1.10      | -1.41      | -1.16      |
| PDK1         | pyruvate dehydrogenase kin    | chr2q31.1            | carbohydrate metabolic process              | Krebs-TCA_Cycle // GenMAPP                  | -1.02         | -1.04     | 1.15      | 1.05       | -1.71      | -1.16      |
| PDK3         | pyruvate dehydrogenase kin    | chrXp22.11           | carbohydrate metabolic process              | Krebs-TCA_Cycle // GenMAPP                  | 1.00          | -1.10     | 1.06      | 1.01       | -1.12      | -1.42      |
| PEG10        | paternally expressed 10       | chr7q21              | placenta development                        | ---                                         | 1.01          | -1.10     | -1.07     | -1.08      | -1.23      | -1.06      |
| PENK         | proenkephalin                 | chr8q23-q24          | behavioral fear response                    | ---                                         | -1.21         | -1.04     | -1.75     | 1.27       | 2.46       | -1.97      |
| PER2         | period circadian clock 2      | chr2q37.3            | negative regulation of transcription from R | Circadian_Exercise // GenMAPP               | 1.02          | 1.05      | -1.11     | -1.03      | -1.41      | 1.13       |
| PEX7         | peroxisomal biogenesis facto  | chr6q23.3            | neuron migration                            | ---                                         | -1.08         | 1.02      | -1.09     | -1.19      | -1.07      | -1.55      |
| PFKFB4       | 6-phosphofructo-2-kinase/fr   | chr3p22-p21          | carbohydrate metabolic process              | ---                                         | 1.05          | 1.00      | -1.00     | 1.17       | -1.35      | -1.97      |
| PGK1         | phosphoglycerate kinase 1     | chrXq13.3            | carbohydrate metabolic process              | Glycolysis_and_Gluconeogenesis // GenMAP    | 1.05          | 1.00      | -1.09     | 1.15       | 1.11       | -1.17      |
| PGK1         | phosphoglycerate kinase 1     | chrXq13.3            | carbohydrate metabolic process              | Glycolysis_and_Gluconeogenesis // GenMAP    | -1.02         | 1.01      | 1.01      | 1.14       | 1.09       | -1.22      |
| PGM2L1       | phosphoglucomutase 2-like     | chr11q13.4           | carbohydrate metabolic process              | ---                                         | 1.14          | 1.05      | -2.40     | 1.09       | -1.23      | -1.26      |
| PGRMC2       | progesterone receptor mem     | chr4q26              | steroid hormone mediated signaling pathw    | ---                                         | 1.00          | -1.12     | -1.08     | -1.10      | -1.52      | -1.15      |
| PHKB         | phosphorylase kinase, beta    | chr16q12-q13         | carbohydrate metabolic process              | Glycogen_Metabolism // GenMAPP              | 1.08          | 1.02      | -1.06     | -1.04      | -1.26      | -1.10      |
| PHLDA1       | pleckstrin homology-like do   | chr12q15             | apoptotic process                           | ---                                         | -1.07         | -1.12     | -1.06     | 1.20       | 1.43       | 1.16       |
| PHLDA1       | pleckstrin homology-like do   | chr12q15             | apoptotic process                           | ---                                         | -1.03         | -1.08     | 1.06      | 1.55       | 1.47       | 1.43       |
| PHLDA1       | pleckstrin homology-like do   | chr12q15             | apoptotic process                           | ---                                         | 1.47          | 1.11      | -1.52     | 1.51       | 1.82       | 1.62       |
| PHLDB2       | pleckstrin homology-like do   | chr3q13.2            | lipid metabolic process                     | ---                                         | -1.50         | -1.32     | 1.08      | 1.10       | 2.08       | 1.79       |
| PII5         | peptidase inhibitor 15        | chr8q21.11           | negative regulation of peptidase activity   | ---                                         | 1.09          | 1.08      | 1.06      | -1.44      | -1.53      | -1.08      |
| PI3          | peptidase inhibitor 3, skin-d | chr20q13.12          | copulation                                  | ---                                         | 1.11          | -1.29     | 1.24      | -1.05      | 1.68       | 1.06       |
| PI3          | peptidase inhibitor 3, skin-d | chr20q13.12          | copulation                                  | ---                                         | 1.19          | 1.10      | 1.42      | 1.02       | 1.60       | 1.15       |
| PIAS2        | protein inhibitor of activat  | chr18q21.1           | transcription, DNA-dependent                | ---                                         | -1.02         | 1.06      | -1.15     | -1.13      | -1.53      | -1.08      |
| PIM2         | pim-2 oncogene                | chrXp11.23           | G1                                          | ---                                         | 1.03          | -1.13     | 1.01      | -1.04      | -1.51      | -1.04      |
| PITPNC1      | phosphatidylinositol transfe  | chr17q24.2           | transport                                   | ---                                         | -1.51         | 1.12      | -1.28     | -1.15      | 1.90       | -1.13      |
| PITPNM3      | PITPNM family member 3        | chr17p13             | transport                                   | ---                                         | 1.02          | -1.12     | -1.13     | -1.13      | -1.08      | -1.19      |
| PLA2G12A     | phospholipase A2, group X     | chr4q25              | lipid metabolic process                     | ---                                         | 1.02          | 1.13      | -1.11     | -1.03      | -1.36      | -1.10      |
| PLCB3        | phospholipase C, beta 3 (ph   | chr11q13             | regulation of systemic arterial blood press | Calcium_regulation_in_cardiac_cells // GenM | 1.04          | -1.31     | -1.14     | 1.10       | 1.21       | 1.01       |
| PLCB4        | phospholipase C, beta 4       | chr20p12             | lipid metabolic process                     | ---                                         | -1.08         | -1.07     | 1.20      | -1.03      | -1.42      | -1.57      |
| PLCXD3       | phosphatidylinositol-specific | chr5p13.1            | lipid metabolic process                     | ---                                         | -1.20         | 1.13      | -1.24     | -1.53      | -2.67      | 1.07       |
| PLXND1       | plexin D1                     | chr3q22.1            | angiogenesis                                | ---                                         | 1.13          | 1.13      | 1.19      | 1.04       | 1.01       | -1.47      |
| PNMA1        | paraneoplastic Ma antigen 1   | chr14q24.3           | inflammatory response to antigenic stimul   | ---                                         | 1.10          | -1.04     | -1.14     | 1.02       | -1.35      | -1.09      |
| PON2         | paraoxonase 2                 | chr7q21.3            | response to oxidative stress                | ---                                         | 1.01          | 1.00      | 1.04      | 1.10       | -1.19      | -1.14      |
| PPP1R15A     | protein phosphatase 1, regul  | chr19q13.2           | regulation of translation                   | ---                                         | 1.14          | 1.03      | 1.17      | 1.49       | 1.87       | 1.66       |
| PPP1R15A     | protein phosphatase 1, regul  | chr19q13.2           | regulation of translation                   | ---                                         | -1.02         | -1.00     | 1.01      | 1.41       | 1.69       | 1.49       |
| PPP1R3C      | protein phosphatase 1, regul  | chr10q23-q24         | carbohydrate metabolic process              | ---                                         | -1.02         | 1.17      | 1.11      | 1.13       | -1.49      | -1.16      |
| PPP1R9A      | protein phosphatase 1, regul  | chr7q21.3            | induction of apoptosis                      | ---                                         | 1.05          | 1.02      | -1.23     | -1.02      | -1.49      | 1.10       |
| PPP2R3A      | protein phosphatase 2, regul  | chr3q22.1            | eye photoreceptor cell differentiation      | Glycogen_Metabolism // GenMAPP              | -1.03         | 1.10      | 1.03      | -1.33      | -1.42      | 1.09       |
| PREX1        | phosphatidylinositol-3,4,5-t  | chr20q13.13          | superoxide metabolic process                | ---                                         | -1.05         | 1.17      | -1.01     | -1.36      | -1.39      | -1.07      |
| PRKAG2       | protein kinase, AMP-activat   | chr7q36.1            | glycogen metabolic process                  | Fatty_Acid_Synthesis // GenMAPP             | 1.04          | 1.14      | 1.08      | 1.13       | -1.85      | -1.09      |
| PRKAG2-AS1   | PRKAG2 antisense RNA 1        | ---                  | 0                                           | ---                                         | 1.22          | 1.02      | 1.06      | -1.28      | -1.53      | -1.00      |
| PRKX         | protein kinase, X-linked      | chrXp22.3            | angiogenesis                                | ---                                         | 1.30          | 1.05      | -1.13     | 1.01       | -1.19      | 1.11       |
| PRSS55       | protease, serine, 55          | chr8p23.1            | proteolysis                                 | ---                                         | 1.24          | 2.16      | -1.18     | 1.05       | 1.33       | -2.24      |
| PRTFDC1      | phosphoribosyl transferase c  | chr10p12.1           | purine ribonucleoside salvage               | ---                                         | -1.01         | 1.02      | -1.11     | -1.33      | -1.10      | -1.30      |
| PRUNE2       | prune homolog 2 (Drosophi     | chr9q21.2            | apoptotic process                           | ---                                         | 1.17          | 1.13      | -1.06     | 1.14       | -1.21      | -1.09      |
| PSD3         | pleckstrin and Sec7 domain    | chr8p21.3            | vesicle-mediated transport                  | Proteasome_Degradation // GenMAPP           | -1.05         | 1.12      | -1.06     | -1.11      | -1.19      | -1.13      |
| PSG2         | pregnancy specific beta-1-g   | chr19q13.1-q13.2     | female pregnancy                            | ---                                         | -1.38         | 1.19      | 1.87      | 1.22       | -1.15      | 1.80       |
| PSG6         | pregnancy specific beta-1-g   | chr19q13.2           | female pregnancy                            | ---                                         | 1.02          | 1.01      | -1.00     | -1.13      | 1.77       | 1.24       |
| PTCH1        | patched 1                     | chr9q22.3            | negative regulation of transcription from R | ---                                         | 1.02          | -1.03     | -1.04     | -1.04      | -1.49      | -1.09      |
| PTGES        | prostaglandin E synthase      | chr9q34.3            | prostaglandin biosynthetic process          | Eicosanoid_Synthesis // GenMAPP             | 1.01          | -1.06     | -1.08     | 1.03       | 1.14       | 1.29       |
| PTPN4        | protein tyrosine phosphatase  | chr2q14.2            | protein dephosphorylation                   | ---                                         | 1.25          | 1.09      | -1.01     | -1.63      | -2.15      | -1.22      |
| RAB27A       | RAB27A, member RAS onc        | chr15q15-q21.1       | GTP catabolic process                       | ---                                         | 1.04          | 1.03      | 1.06      | -1.10      | -1.36      | -1.16      |
| RAB40B       | RAB40B, member RAS onc        | chr17q25.3           | GTP catabolic process                       | ---                                         | -1.03         | 1.07      | 1.02      | -1.41      | -1.36      | -1.03      |

| ID              | Gene Title                      | Chromosomal Location   | 1st Gene Ontology Biological Process         | Pathway                                   | A2497 30 mins | A2497 2 h | A2497 4 h | A2497 24 h | A2497 48 h | A2497 72 h |
|-----------------|---------------------------------|------------------------|----------------------------------------------|-------------------------------------------|---------------|-----------|-----------|------------|------------|------------|
| RAB40C          | RAB40C, member RAS onc          | chr16p13.3             | small GTPase mediated signal transduction    | ---                                       | 1.00          | -1.02     | 1.21      | 1.26       | -1.36      | -1.35      |
| RARRES1         | retinoic acid receptor respon   | chr3q25.32             | negative regulation of cell proliferation    | ---                                       | 1.13          | 1.03      | -1.13     | 1.01       | 1.41       | 1.43       |
| RARRES1         | retinoic acid receptor respon   | chr3q25.32             | negative regulation of cell proliferation    | ---                                       | 1.03          | 1.11      | -1.13     | -1.11      | 1.02       | 1.74       |
| RBMX /// SNOR   | RNA binding motif protein,      | chrXq26.3              | regulation of alternative mRNA splicing,     | ---                                       | -1.28         | -1.01     | 1.19      | 1.90       | 1.24       | 1.51       |
| RBP1            | retinol binding protein 1, ce   | chr3q23                | retinoid metabolic process                   | ---                                       | -1.27         | -1.57     | 1.19      | -1.02      | -1.56      | -1.46      |
| RBPJ            | recombination signal bindin     | chr4p15.2              | negative regulation of transcription from P  | ---                                       | -1.09         | -1.04     | 1.03      | 1.06       | -1.23      | -1.08      |
| RET             | ret proto-oncogene              | chr10q11.2             | MAPK cascade                                 | ---                                       | 1.35          | 2.99      | -1.76     | 1.72       | 1.17       | -2.11      |
| REXO1           | REX1, RNA exonuclease 1         | chr19p13.3             | 0                                            | ---                                       | 1.31          | 1.23      | 1.21      | -1.54      | 2.16       | -1.23      |
| RFX3            | regulatory factor X, 3 (influe  | chr9p24.2              | transcription, DNA-dependent                 | ---                                       | 1.01          | -1.07     | -1.19     | 1.07       | -1.61      | 1.10       |
| RHOBTB1         | Rho-related BTB domain co       | chr10q21.2             | GTP catabolic process                        | ---                                       | 1.07          | 1.00      | -1.02     | -1.15      | -1.43      | -1.17      |
| RIMKLA          | ribosomal modification prot     | chr1p34.2              | cellular protein modification process        | ---                                       | 3.44          | -1.88     | -3.24     | -4.23      | -17.39     | -3.41      |
| RND3            | Rho family GTPase 3             | chr2q23.3              | GTP catabolic process                        | ---                                       | -1.01         | -1.01     | -1.01     | 1.10       | 1.21       | 1.55       |
| RNF10           | ring finger protein 10          | chr12q24.31            | transcription, DNA-dependent                 | ---                                       | 1.07          | -1.00     | -1.13     | 1.02       | -1.17      | -1.07      |
| RNF141          | ring finger protein 141         | chr11p15.4             | regulation of transcription, DNA-depende     | ---                                       | 3.52          | 1.35      | -1.41     | -4.42      | -2.33      | -2.17      |
| RNF150          | ring finger protein 150         | chr4q31.21             | 0                                            | ---                                       | 1.04          | 1.13      | 1.11      | -1.04      | -1.18      | -1.15      |
| RPSA            | ribosomal protein SA            | chr3p22.2              | ribosomal small subunit assembly             | Ribosomal_Proteins // GenMAPP             | -1.07         | -1.02     | -1.05     | 1.04       | -1.01      | -1.31      |
| RRN3 /// RRN3P  | RRN3 RNA polymerase I tr        | 2 /// chr16p12 /// chr | in utero embryonic development               | ---                                       | -1.07         | 1.00      | -1.06     | -1.23      | 1.45       | 1.77       |
| S100A7          | S100 calcium binding prote      | chr1q21                | response to reactive oxygen species          | ---                                       | 5.78          | 1.48      | 1.61      | -1.19      | -1.13      | 2.19       |
| SCARB1          | scavenger receptor class B,     | chr12q24.31            | endothelial cell proliferation               | Statin_Pathway_PharmGKB // GenMAPP        | 1.02          | -1.07     | 1.12      | 1.03       | -1.00      | -1.25      |
| SCD5            | stearyl-CoA desaturase 5        | chr4q21.22             | lipid metabolic process                      | ---                                       | 1.13          | -1.03     | 1.13      | 1.10       | -1.56      | 1.08       |
| SCN1A           | sodium channel, voltage-gat     | chr2q24.3              | regulation of action potential               | ---                                       | 1.07          | 1.15      | 1.17      | -1.32      | -1.59      | -1.56      |
| SCN1A           | sodium channel, voltage-gat     | chr2q24.3              | regulation of action potential               | ---                                       | -1.16         | -1.20     | 1.12      | 1.26       | -2.44      | 1.32       |
| SCYL2           | SCY1-like 2 (S. cerevisiae)     | chr12q23.1             | positive regulation of receptor internalizat | ---                                       | -1.01         | -1.01     | 1.05      | 1.11       | 1.16       | 1.38       |
| SEMA4C          | sema domain, immunoglobul       | chr2q11.2              | neural tube closure                          | ---                                       | 1.00          | 1.12      | -1.69     | -1.02      | 1.25       | -1.06      |
| SEPSECS         | Sep (O-phosphoserine) tRN       | chr4p15.2              | selenocysteine incorporation                 | ---                                       | -1.04         | -1.09     | 1.48      | 1.01       | -1.51      | -1.00      |
| Sept-6          | septin 6                        | chrXq24                | cytokinesis                                  | ---                                       | 1.01          | 1.13      | -1.32     | -1.12      | -1.39      | -1.12      |
| SERPINB3        | serpin peptidase inhibitor, c   | chr18q21.3             | response to virus                            | ---                                       | -19.88        | 1.66      | 6.27      | 1.39       | 2.48       | 1.66       |
| SERPINB3        | serpin peptidase inhibitor, c   | chr18q21.3             | response to virus                            | ---                                       | 1.23          | -1.52     | 1.04      | 1.22       | 2.61       | 1.83       |
| SERPINB3 /// SE | serpin peptidase inhibitor, c   | chr18q21.3             | immune response                              | ---                                       | -1.21         | -1.44     | 1.00      | -2.06      | 3.17       | 1.82       |
| SERPINB4        | serpin peptidase inhibitor, c   | chr18q21.3             | immune response                              | ---                                       | -1.59         | -8.96     | -1.19     | 1.49       | 1.98       | 1.71       |
| SF3B4           | splicing factor 3b, subunit 4   | chr1q21.2              | RNA splicing, via transesterification react  | mRNA_processing_Reactome // GenMAPP       | 1.05          | -1.07     | -1.16     | -1.01      | 1.26       | 1.07       |
| SFTPA1 /// SFTP | surfactant protein A1 /// surf  | chr10q22.3             | lipid transport                              | ---                                       | 1.17          | -2.18     | -1.12     | -3.00      | -1.84      | -1.95      |
| SFXN3           | sideroflexin 3                  | chr10q24.31            | negative regulation of transcription from P  | ---                                       | 1.01          | -1.09     | -1.06     | -1.03      | -1.07      | -1.26      |
| SH3BGRL         | SH3 domain binding glutam       | chrXq13.3              | 0                                            | ---                                       | 1.08          | 1.01      | -1.03     | 1.10       | -1.16      | 1.07       |
| SH3D19          | SH3 domain containing 19        | chr4q31.3              | post-Golgi vesicle-mediated transport        | ---                                       | 1.03          | 1.05      | -1.32     | 1.02       | -1.32      | 1.05       |
| SH3GLB2         | SH3-domain GRB2-like enc        | chr9q34                | 0                                            | ---                                       | 1.16          | 1.11      | 1.09      | 1.47       | 1.06       | 1.31       |
| SHMT1           | serine hydroxymethyltransfe     | chr17p11.2             | glycine metabolic process                    | ---                                       | -1.10         | 1.08      | 1.01      | 1.01       | -1.09      | -1.03      |
| SHMT1           | serine hydroxymethyltransfe     | chr17p11.2             | L-serine catabolic process                   | ---                                       | -1.05         | 1.14      | 1.02      | 1.00       | -1.23      | 1.04       |
| SIX4            | SIX homeobox 4                  | chr14q23               | regulation of transcription, DNA-depende     | ---                                       | -1.02         | 1.44      | -1.07     | -1.23      | 1.37       | 2.71       |
| SLC12A3         | solute carrier family 12 (sod   | chr16q13               | transport                                    | ---                                       | -1.13         | 1.23      | -1.34     | -1.23      | -1.76      | -1.08      |
| SLC25A33        | solute carrier family 25 (pyr   | chr1p36.22             | transport                                    | ---                                       | 1.13          | -1.02     | -1.04     | 1.08       | 1.14       | 1.19       |
| SLC2A1          | solute carrier family 2 (facili | chr1p34.2              | carbohydrate metabolic process               | ---                                       | 1.13          | 1.05      | 1.18      | 1.05       | -1.40      | -1.95      |
| SLC2A1          | solute carrier family 2 (facili | chr1p34.2              | carbohydrate metabolic process               | ---                                       | 1.08          | -1.01     | -1.06     | 1.04       | -1.18      | -1.27      |
| SLC30A9         | solute carrier family 30 (zinc  | chr4p13                | nucleotide-excision repair                   | ---                                       | 1.02          | -1.14     | -1.08     | 1.04       | -1.14      | -1.03      |
| SLC35D1         | solute carrier family 35 (UD    | chr1p32-p31            | UDP-glucuronate biosynthetic process         | ---                                       | 1.09          | 1.21      | 1.10      | -1.25      | -1.35      | 1.07       |
| SLC4A1          | solute carrier family 4, anion  | chr17q21.31            | transport                                    | ---                                       | 1.04          | 1.49      | -1.15     | 1.46       | 1.32       | -2.19      |
| SLC6A10P /// SL | solute carrier family 6 (neur   | chr16p11.2 /// chrXq2  | creatine metabolic process                   | ---                                       | 1.07          | 1.15      | -1.20     | 1.26       | -1.46      | -1.17      |
| SLC6A8          | solute carrier family 6 (neur   | chrXq28                | creatine metabolic process                   | ---                                       | 1.00          | 1.03      | 1.16      | 1.28       | -1.24      | -1.37      |
| SLITRK5         | SLIT and NTRK-like family       | chr13q31.2             | synaptic transmission                        | ---                                       | 1.06          | 1.08      | 1.09      | -1.01      | -1.22      | -1.19      |
| SMAP2           | small ArfGAP2                   | chr1p35.3-p34.1        | regulation of ARF GTPase activity            | ---                                       | 1.11          | 1.08      | -1.13     | -1.02      | -1.19      | -1.29      |
| SMEK2           | SMEK homolog 2, suppress        | chr2p16.1              | protein dephosphorylation                    | ---                                       | 1.03          | -1.07     | -1.15     | -1.04      | 1.17       | 2.33       |
| SNTB1           | syntrophin, beta 1 (dystroph    | chr8q23-q24            | muscle contraction                           | ---                                       | 1.08          | 1.08      | 1.02      | 1.04       | -1.52      | -1.04      |
| SNTB2           | syntrophin, beta 2 (dystroph    | chr16q22.1             | 0                                            | ---                                       | 1.03          | 1.16      | -1.04     | -1.12      | -1.40      | 1.05       |
| SNX18           | sorting nexin 18                | chr5q11.2              | mitotic cytokinesis                          | ---                                       | 2.63          | 3.49      | -2.56     | 11.17      | 10.27      | 1.15       |
| SOGA2           | SOGA family member 2            | chr18p11.22            | regulation of autophagy                      | ---                                       | -1.00         | -1.10     | 1.08      | -1.01      | -1.24      | -1.01      |
| SORCS1          | sortilin-related VPS10 doma     | chr10q23-q25           | neuropeptide signaling pathway               | ---                                       | 1.37          | 2.78      | -2.20     | -2.10      | -2.07      | 3.15       |
| SORT1           | sortilin 1                      | chr1p13.3 1p21.3-p13   | ossification                                 | ---                                       | -1.05         | 1.03      | 1.09      | 1.13       | -1.14      | -1.13      |
| SOS1            | son of sevenless homolog 1      | chr2p21                | apoptotic process                            | Integrin-mediated_cell_adhesion_KEGG // G | -1.05         | 1.14      | -1.00     | -1.20      | -1.33      | -1.19      |
| SPEF2           | sperm flagellar 2               | chr5p13.2              | immune system development                    | ---                                       | 1.17          | -1.16     | 1.14      | 1.54       | 1.09       | 1.05       |
| SPIRE2          | spire homolog 2 (Drosophila     | chr16q24               | transport                                    | ---                                       | -1.13         | -1.12     | -1.13     | -1.18      | -1.79      | -1.51      |
| SPRY4           | sprouty homolog 4 (Drosophi     | chr5q31.3              | multicellular organismal development         | ---                                       | 1.15          | -1.23     | -1.80     | 1.35       | 1.39       | 2.79       |
| SSBP3           | single stranded DNA bindin      | chr1p32.3              | transcription, DNA-dependent                 | ---                                       | -1.04         | 1.01      | 1.05      | 1.15       | -1.32      | -1.04      |
| SSFA2           | sperm specific antigen 2        | chr2q31.3              | 0                                            | ---                                       | -1.00         | -1.06     | 1.01      | 1.11       | 1.16       | 1.34       |
| SYNCRIP         | synaptotagmin binding, cyto     | chr6q14-q15            | mRNA splicing, via spliceosome               | ---                                       | 1.04          | 1.08      | 1.00      | -1.22      | 1.01       | 1.28       |
| SYNJ2           | synaptjanin 2                   | chr6q25.3              | phospholipid metabolic process               | ---                                       | 1.02          | 1.18      | 1.01      | 1.11       | -1.15      | -1.11      |
| SYNM            | synemin, intermediate filame    | chr15q26.3             | intermediate filament cytoskeleton organiz   | ---                                       | -1.11         | 1.05      | 1.09      | -1.01      | -1.16      | -1.03      |
| SYT11           | synaptotagmin XI                | chr1q21.2              | transport                                    | ---                                       | 1.04          | -1.03     | 1.15      | 1.16       | -1.24      | 1.05       |
| SYTL5           | synaptotagmin-like 5            | chrXp21.1              | intracellular protein transport              | ---                                       | -1.06         | 1.13      | 1.10      | -1.09      | -1.60      | -1.36      |
| TAF9B           | TAF9B RNA polymerase II         | chrXq13.1-q21.1        | negative regulation of transcription from P  | ---                                       | 1.18          | 1.05      | 1.22      | 1.03       | -1.56      | -1.33      |
| TBC1D12         | TBC1 domain family, memb        | chr10q23.33            | regulation of Rab GTPase activity            | ---                                       | 1.23          | -1.13     | -1.00     | 1.09       | 1.29       | 2.52       |
| TBC1D9B         | TBC1 domain family, memb        | chr5q35.3              | regulation of Rab GTPase activity            | ---                                       | 1.10          | 1.02      | 1.10      | 1.02       | -1.13      | -1.00      |
| TBC1D9B         | TBC1 domain family, memb        | chr5q35.3              | regulation of Rab GTPase activity            | ---                                       | -1.01         | -1.08     | 1.13      | -1.01      | -1.09      | -1.21      |
| TBCEL           | tubulin folding cofactor E-li   | chr11q23.3             | 0                                            | ---                                       | 1.12          | -1.14     | 1.00      | -1.31      | -1.52      | 1.37       |
| TCF19           | transcription factor 19         | chr6p21.3              | transcription, DNA-dependent                 | ---                                       | 1.04          | 1.01      | 1.02      | 1.06       | -1.14      | -1.51      |
| TFAP2E          | transcription factor AP-2 ep    | chr1p34.3              | transcription, DNA-dependent                 | ---                                       | 1.35          | -1.20     | -1.12     | 2.87       | 1.46       | -1.25      |
| TFDP2           | transcription factor Dp-2 (E    | chr3q23                | G1 phase of mitotic cell cycle               | G1_to_S_cell_cycle_Reactome // GenMAPP    | -1.01         | -1.03     | 1.04      | -1.24      | -1.17      | -1.02      |
| TFF2            | trefoil factor 2                | chr21q22.3             | digestion                                    | ---                                       | 1.16          | 1.14      | 1.51      | 1.26       | 1.13       | 1.27       |
| TGM2            | transglutaminase 2 (C polyp     | chr20q12               | blood vessel remodeling                      | ---                                       | 3.53          | 1.14      | -1.10     | -1.27      | 1.50       | -1.00      |
| TMED4           | transmembrane emp24 prote       | chr7p13                | transport                                    | ---                                       | -1.10         | 1.02      | -1.05     | -1.03      | -1.35      | -1.30      |
| TMEM107         | transmembrane protein 107       | chr17p13.1             | multicellular organismal development         | ---                                       | 1.08          | 1.04      | 1.09      | 1.07       | -1.03      | -1.38      |
| TMEM107         | transmembrane protein 107       | chr17p13.1             | multicellular organismal development         | ---                                       | 1.03          | -1.01     | -1.01     | 1.07       | -1.22      | -1.32      |
| TMEM107         | transmembrane protein 107       | chr17p13.1             | multicellular organismal development         | ---                                       | -1.04         | -1.02     | -1.07     | 1.30       | -1.11      | -1.21      |
| TMEM52B         | transmembrane protein 52B       | chr12p13.2             | 0                                            | ---                                       | 1.03          | -1.01     | -1.16     | -1.25      | 1.01       | 1.63       |
| TMEM9B          | TMEM9 domain family, me         | chr11p15.3             | signal transduction                          | ---                                       | -1.23         | 1.07      | 1.05      | 1.34       | 1.40       | 1.51       |
| TNFAIP3         | tumor necrosis factor, alpha    | chr6q23                | B-1 B cell homeostasis                       | ---                                       | -1.12         | -1.04     | -1.15     | 1.44       | 1.78       | 2.58       |
| TNFAIP3         | tumor necrosis factor, alpha    | chr6q23                | B-1 B cell homeostasis                       | ---                                       | -1.25         | -1.06     | 1.09      | 1.10       | 1.26       | 2.29       |
| TNFAIP6         | tumor necrosis factor, alpha    | chr2q23.3              | inflammatory response                        | ---                                       | 1.45          | -1.56     | -3.61     | -1.09      | 2.20       | 1.66       |

| ID              | Gene Title                               | Chromosomal Location | 1st Gene Ontology Biological Process                                 | Pathway                                   | A2497 30 mins | A2497 2 h | A2497 4 h | A2497 24 h | A2497 48 h | A2497 72 h |
|-----------------|------------------------------------------|----------------------|----------------------------------------------------------------------|-------------------------------------------|---------------|-----------|-----------|------------|------------|------------|
| TNFAIP6         | tumor necrosis factor, alpha             | chr2q23.3            | inflammatory response                                                | ---                                       | -2.34         | -1.18     | -1.51     | 6.02       | -1.10      | 1.93       |
| TNFRSF12A       | tumor necrosis factor receptor           | chr16p13.3           | angiogenesis                                                         | ---                                       | -1.03         | 1.12      | -1.08     | 1.14       | 1.44       | 1.32       |
| TNPO1           | transportin 1                            | chr5q13.2            | protein import into nucleus, translocation                           | ---                                       | -1.04         | 1.09      | 1.02      | 1.08       | -1.06      | 1.45       |
| TNS1            | tensin 1                                 | chr2q35-q36          | cell-substrate junction assembly                                     | Integrin-mediated_cell_adhesion_KEGG // G | 1.05          | 1.06      | -1.17     | -1.11      | -1.24      | -1.27      |
| TP53INP2        | tumor protein p53 inducible              | chr20q11.22          | autophagic vacuole assembly                                          | ---                                       | 1.08          | -1.04     | 1.01      | -1.06      | -1.28      | -1.43      |
| TPD52           | tumor protein D52                        | chr8q21              | anatomical structure morphogenesis                                   | ---                                       | 1.08          | 1.02      | -1.28     | -1.04      | -1.35      | -1.08      |
| TRAF4           | TNF receptor-associated factor           | chr17q11-q12         | apoptotic process                                                    | ---                                       | 1.00          | 1.14      | -1.03     | 1.02       | 1.43       | 1.31       |
| TRAPPC11        | trafficking protein particle complex     | chr4q35.1            | transport                                                            | ---                                       | -1.05         | -1.02     | 1.03      | -1.05      | -1.49      | -1.06      |
| TRERF1          | transcriptional regulating factor        | chr6p21.1-p12.1      | transcription, DNA-dependent                                         | ---                                       | -1.02         | -1.03     | -1.15     | -1.11      | -1.61      | -1.26      |
| TRIM73 /// TRIM | tripartite motif containing 73           | chr7q11.23           | 0                                                                    | ---                                       | 1.36          | -2.07     | -2.55     | -2.27      | 1.67       | -2.40      |
| TRIQK           | triple QxxK/R motif containing           | chr8q22.1            | 0                                                                    | ---                                       | 1.08          | -1.03     | -1.18     | -1.11      | -1.44      | -1.02      |
| TRNAU1AP        | tRNA selenocysteine 1 associated         | chr1p35.3            | selenocysteine incorporation                                         | ---                                       | -1.08         | 1.07      | 1.05      | -1.08      | -1.01      | -1.61      |
| TSC22D3         | TSC22 domain family, member              | chrXq22.3            | negative regulation of transcription from RNA polymerase II promoter | ---                                       | -1.31         | 1.17      | 1.21      | 1.07       | -1.27      | -1.40      |
| TSHZ2           | teashirt zinc finger homeobox            | chr20q13.2           | transcription, DNA-dependent                                         | ---                                       | -1.03         | -1.07     | 1.06      | -1.05      | -1.21      | -1.22      |
| TSPAN13         | tetraspanin 13                           | chr7p21.1            | 0                                                                    | ---                                       | -1.03         | 1.02      | -1.06     | 1.01       | -1.18      | 1.09       |
| TSPAN8          | tetraspanin 8                            | chr12q14.1-q21.1     | protein glycosylation                                                | ---                                       | -1.06         | -1.00     | 1.05      | 1.03       | -1.25      | -1.11      |
| TTC39C          | tetratricopeptide repeat domain          | chr18q11.2           | 0                                                                    | ---                                       | -1.09         | -1.07     | -1.01     | -1.08      | -1.25      | 1.02       |
| TTC9            | tetratricopeptide repeat domain          | chr14q24.2           | 0                                                                    | ---                                       | -1.04         | -1.12     | -1.09     | -1.77      | 1.44       | -1.11      |
| TTLL6           | tubulin tyrosine ligase-like family      | chr17q21.32          | microtubule bundle formation                                         | ---                                       | -1.01         | -1.54     | -2.13     | -1.67      | 1.03       | -2.24      |
| TTYH3           | tweety homolog 3 (Drosophila)            | chr7p22              | transport                                                            | ---                                       | 1.06          | 1.24      | 1.02      | 1.12       | -1.23      | -1.36      |
| TUBA1A          | tubulin, alpha 1a                        | chr12q13.12          | G2                                                                   | ---                                       | -1.11         | 1.03      | 1.09      | -1.07      | -1.24      | -1.37      |
| TUBGCP5         | tubulin, gamma complex associated        | chr15q11.2           | G2                                                                   | ---                                       | 1.06          | -1.01     | -1.24     | -1.05      | -1.70      | -1.07      |
| TYW5            | tRNA-yW synthesizing protein             | chr2q33.1            | tRNA processing                                                      | ---                                       | -1.06         | 1.01      | 1.36      | -1.09      | 2.15       | 1.15       |
| UBE2D4          | ubiquitin-conjugating enzyme             | chr7p13              | protein ubiquitination                                               | ---                                       | -1.08         | -1.03     | -1.04     | -1.12      | -1.34      | -1.20      |
| UBE4B           | ubiquitination factor E4B                | chr1p36.3            | protein polyubiquitination                                           | ---                                       | -1.02         | -1.02     | 1.03      | -1.07      | -1.22      | -1.11      |
| UCP2            | uncoupling protein 2 (mitochondrial)     | chr11q13             | response to superoxide                                               | Electron_Transport_Chain // GenMAPP       | -1.06         | -1.00     | 1.01      | 1.01       | -1.18      | -1.05      |
| ULK1            | unc-51-like kinase 1 (C. elegans)        | chr12q24.3           | autophagic vacuole assembly                                          | ---                                       | -1.09         | 1.07      | -1.04     | -1.03      | -1.38      | -1.40      |
| UPK1A           | uroplakin 1A                             | chr19q13.13          | epithelial cell differentiation                                      | ---                                       | 1.59          | -1.02     | -1.43     | -1.11      | -1.19      | -1.13      |
| VAV3            | vav 3 guanine nucleotide exchange factor | chr1p13.3            | angiogenesis                                                         | Integrin-mediated_cell_adhesion_KEGG // G | -1.06         | 1.28      | -1.01     | -1.52      | -1.71      | -1.18      |
| VAV3            | vav 3 guanine nucleotide exchange factor | chr1p13.3            | angiogenesis                                                         | Integrin-mediated_cell_adhesion_KEGG // G | 1.03          | 1.24      | -1.02     | -1.11      | -1.66      | -1.05      |
| VGLL3           | vestigial like 3 (Drosophila)            | chr3p12.1            | transcription, DNA-dependent                                         | ---                                       | -1.03         | 1.03      | 1.02      | -1.25      | -1.51      | -1.01      |
| VPS13B          | vacuolar protein sorting 13 family       | chr8q22.2            | transport                                                            | ---                                       | -1.01         | 1.03      | -1.01     | -1.05      | -1.22      | 1.10       |
| VPS36           | vacuolar protein sorting 36 family       | chr13q14.3           | transcription, DNA-dependent                                         | ---                                       | 1.02          | 1.04      | -1.14     | -1.07      | -1.46      | 1.07       |
| VPS37A          | vacuolar protein sorting 37 family       | chr8p22              | transport                                                            | ---                                       | -1.03         | 1.13      | -1.08     | 1.05       | -1.06      | 1.29       |
| WDR20           | WD repeat domain 20                      | chr14q32.31          | 0                                                                    | ---                                       | -1.04         | 1.03      | -1.00     | -1.12      | 1.19       | 1.34       |
| WDR60           | WD repeat domain 60                      | chr7q36.3            | 0                                                                    | ---                                       | 1.14          | -1.05     | 1.06      | 1.03       | -1.21      | -1.15      |
| WTAP            | Wilms tumor 1 associated protein         | chr6q25-q27          | mRNA processing                                                      | ---                                       | 1.01          | 1.01      | 1.10      | 1.26       | 1.31       | 1.29       |
| WTAP            | Wilms tumor 1 associated protein         | chr6q25-q27          | mRNA processing                                                      | ---                                       | 1.06          | -1.08     | 1.08      | 1.17       | 1.72       | 1.35       |
| YRDC            | yrnC domain containing (E. coli)         | chr1p34.3            | negative regulation of transport                                     | ---                                       | 1.08          | 1.34      | 1.12      | 1.28       | 1.47       | 1.21       |
| ZC3H14          | zinc finger CCHH-type containing         | chr14q31.3           | 0                                                                    | ---                                       | -1.03         | 1.09      | -1.14     | -1.18      | -1.38      | 1.12       |
| ZMIZ1           | zinc finger, MIZ-type containing         | chr10q22.3           | vasculogenesis                                                       | ---                                       | 1.01          | -1.00     | -1.15     | -1.11      | -1.17      | -1.03      |
| ZNF207          | zinc finger protein 207                  | chr17q11.2           | regulation of transcription, DNA-dependent                           | ---                                       | 1.01          | -1.03     | 1.02      | 1.00       | 1.12       | 1.18       |
| ZNF268          | zinc finger protein 268                  | chr12q24.33          | transcription, DNA-dependent                                         | ---                                       | 1.01          | 1.07      | 1.15      | -1.03      | -1.65      | 1.02       |
| ZNF362          | zinc finger protein 362                  | chr1p35.1            | transcription, DNA-dependent                                         | ---                                       | -1.01         | 1.02      | 1.09      | -1.01      | -1.25      | -1.12      |
| ZNF382          | zinc finger protein 382                  | chr19q13.12          | transcription, DNA-dependent                                         | ---                                       | 1.46          | 1.33      | -1.29     | 4.10       | 1.13       | 1.41       |
| ZNF418          | zinc finger protein 418                  | chr19q13.43          | transcription, DNA-dependent                                         | ---                                       | -2.39         | -1.03     | -2.25     | 2.85       | 1.60       | 2.72       |
| ZNF567          | zinc finger protein 567                  | chr19q13.12          | transcription, DNA-dependent                                         | ---                                       | 1.54          | 1.22      | 1.39      | -1.32      | -1.97      | -1.21      |
| ZNF616          | zinc finger protein 616                  | chr19q13.41          | transcription, DNA-dependent                                         | ---                                       | 1.46          | -1.03     | 1.04      | 1.00       | -1.62      | -1.46      |
| ZNRF1           | zinc and ring finger 1, E3 ubiquitin     | chr16q23.1           | protein ubiquitination                                               | ---                                       | -1.04         | 1.10      | 1.06      | -1.01      | -1.20      | -1.05      |
| 231331_at       | ---                                      | ---                  | 0                                                                    | ---                                       | 1.06          | -1.04     | 1.01      | -1.12      | 1.17       | 1.13       |
| 229024_at       | ---                                      | ---                  | 0                                                                    | ---                                       | 1.07          | 1.04      | 1.01      | -1.04      | -1.30      | -1.01      |
| 231519_at       | ---                                      | ---                  | 0                                                                    | ---                                       | 1.81          | 1.61      | 1.19      | 1.36       | -1.85      | 2.53       |
| 235924_at       | ---                                      | ---                  | 0                                                                    | ---                                       | 1.07          | -1.02     | -1.15     | -1.47      | -1.43      | -1.09      |
| 1559214_at      | ---                                      | ---                  | 0                                                                    | ---                                       | 1.02          | -1.06     | -1.23     | -1.38      | -1.54      | 1.05       |
| 237089_at       | ---                                      | ---                  | 0                                                                    | ---                                       | 1.27          | -2.03     | -4.27     | 1.20       | 3.45       | 1.01       |
| 242490_at       | ---                                      | ---                  | 0                                                                    | ---                                       | 1.13          | 1.09      | 1.04      | -1.27      | -1.67      | -1.31      |
| 231315_at       | ---                                      | ---                  | 0                                                                    | ---                                       | -4.79         | -1.33     | 1.90      | -1.99      | -1.80      | 1.38       |
| 229810_at       | ---                                      | ---                  | 0                                                                    | ---                                       | 1.03          | -1.05     | -1.16     | -1.14      | -1.32      | -1.21      |
| 232871_at       | ---                                      | ---                  | 0                                                                    | ---                                       | 1.43          | -4.14     | 1.22      | 1.12       | 3.59       | 2.45       |
| 1569439_at      | ---                                      | ---                  | 0                                                                    | ---                                       | 1.15          | 1.09      | -1.38     | -1.45      | 1.56       | 1.19       |
| 242486_at       | ---                                      | ---                  | 0                                                                    | ---                                       | 1.18          | 1.10      | -1.04     | -1.16      | -2.19      | -1.10      |
| 1561989_at      | ---                                      | ---                  | 0                                                                    | ---                                       | 1.19          | 4.34      | 4.11      | -1.21      | 1.17       | -1.05      |
| 237474_at       | ---                                      | ---                  | 0                                                                    | ---                                       | 1.66          | -1.74     | -1.22     | -1.15      | 2.85       | 2.37       |
| 237258_at       | ---                                      | ---                  | 0                                                                    | ---                                       | 3.60          | -1.19     | 1.98      | -1.53      | 1.38       | 1.16       |
| 236397_at       | ---                                      | ---                  | 0                                                                    | ---                                       | -1.01         | -1.09     | -1.31     | 1.26       | 1.54       | -1.08      |
| 1564148_at      | ---                                      | ---                  | 0                                                                    | ---                                       | 1.28          | -1.16     | -1.07     | -2.99      | -2.45      | -1.13      |
| 1570552_at      | ---                                      | ---                  | 0                                                                    | ---                                       | -1.13         | 1.02      | -1.04     | -1.07      | -1.34      | -1.00      |
| 239310_at       | ---                                      | ---                  | 0                                                                    | ---                                       | -1.32         | 1.24      | -1.01     | -1.53      | -2.13      | -1.35      |
| 1559444_at      | ---                                      | ---                  | 0                                                                    | ---                                       | -1.03         | 1.05      | 1.05      | -1.03      | -1.13      | 1.42       |
| 237798_at       | ---                                      | ---                  | 0                                                                    | ---                                       | 1.36          | -1.06     | -1.44     | -1.06      | 3.46       | -1.44      |
| 237728_at       | ---                                      | ---                  | 0                                                                    | ---                                       | -1.31         | 1.71      | 1.60      | -2.49      | 1.98       | 2.15       |
| 231428_at       | ---                                      | ---                  | 0                                                                    | ---                                       | 1.10          | 1.10      | -1.00     | 1.14       | 1.65       | -1.01      |
| 232823_at       | ---                                      | ---                  | 0                                                                    | ---                                       | -4.70         | -1.43     | 1.82      | 1.16       | -1.55      | -4.35      |
| 240991_at       | ---                                      | ---                  | 0                                                                    | ---                                       | -1.39         | 1.45      | -1.01     | 1.42       | -2.08      | -1.97      |
| 233303_at       | ---                                      | ---                  | 0                                                                    | ---                                       | 1.23          | 1.13      | 1.03      | 1.17       | -2.25      | -1.27      |
| 229333_at       | ---                                      | ---                  | 0                                                                    | ---                                       | 1.06          | -1.00     | -1.14     | -1.11      | -1.24      | -1.04      |
| 222170_at       | ---                                      | ---                  | 0                                                                    | ---                                       | -1.03         | 1.18      | -1.10     | -1.18      | -1.14      | -1.45      |
| 241635_at       | ---                                      | ---                  | 0                                                                    | ---                                       | 1.61          | -1.02     | -1.63     | 1.54       | 5.05       | -1.53      |
| 231611_at       | ---                                      | ---                  | 0                                                                    | ---                                       | -1.45         | 1.41      | 1.02      | 1.31       | 1.19       | 2.67       |
| 242205_at       | ---                                      | ---                  | 0                                                                    | ---                                       | -1.34         | -1.03     | 1.08      | -1.30      | -1.81      | -1.25      |
| 240463_at       | ---                                      | ---                  | 0                                                                    | ---                                       | 1.06          | 1.28      | 1.08      | 1.03       | 2.01       | 1.28       |
| 226348_at       | ---                                      | ---                  | 0                                                                    | ---                                       | 1.01          | 1.11      | -1.05     | 1.10       | -1.29      | -1.34      |
| 236898_at       | ---                                      | ---                  | 0                                                                    | ---                                       | -1.08         | -1.23     | 1.19      | 1.05       | 1.95       | 2.04       |
| 216201_at       | ---                                      | ---                  | 0                                                                    | ---                                       | -5.93         | -1.46     | -2.52     | 1.31       | 2.64       | -2.91      |
| 238928_at       | ---                                      | ---                  | 0                                                                    | ---                                       | -1.55         | -1.11     | 1.11      | 1.01       | 1.27       | 2.07       |
| 236180_at       | ---                                      | ---                  | 0                                                                    | ---                                       | 1.08          | -1.05     | -1.13     | -1.14      | -1.19      | -1.77      |
| 241558_at       | ---                                      | ---                  | 0                                                                    | ---                                       | 1.83          | 1.50      | -1.34     | 1.13       | -6.91      | 1.06       |

| ID          | Gene Title | Chromosomal Location | 1st Gene Ontology Biological Process | Pathway | A2497 30 mins | A2497 2 h | A2497 4 h | A2497 24 h | A2497 48 h | A2497 72 h |
|-------------|------------|----------------------|--------------------------------------|---------|---------------|-----------|-----------|------------|------------|------------|
| 242300_at   | ---        | ---                  | 0                                    | ---     | 1.03          | -1.13     | -1.00     | -1.07      | -1.28      | 1.33       |
| 234025_at   | ---        | ---                  | 0                                    | ---     | 1.74          | 1.08      | 1.03      | -5.78      | 2.12       | -1.53      |
| 233014_at   | ---        | ---                  | 0                                    | ---     | 1.00          | -1.08     | -1.13     | 1.42       | -1.15      | -1.88      |
| 1560898_at  | ---        | ---                  | 0                                    | ---     | 1.18          | -1.31     | 2.43      | 4.15       | 1.12       | -1.82      |
| 236772_s_at | ---        | ---                  | 0                                    | ---     | -1.04         | -1.03     | -1.19     | 1.02       | -1.30      | -1.30      |
| 213602_s_at | ---        | ---                  | 0                                    | ---     | -1.08         | 1.38      | -1.10     | 1.31       | -1.96      | -1.41      |
| 237521_x_at | ---        | ---                  | 0                                    | ---     | 2.81          | -1.45     | 1.06      | -1.25      | -1.07      | -1.56      |
| 231489_x_at | ---        | ---                  | 0                                    | ---     | 1.15          | -1.04     | -1.09     | 1.30       | -1.33      | -1.08      |

**Table S3. Oligo sequences used for qPCR validation of expression of genes.**

| Gene          | Forward Primer             | Reverse Primer               | Probe <sup>1</sup>                        |
|---------------|----------------------------|------------------------------|-------------------------------------------|
| <i>CCL5</i>   | CTCTGCGCTCCTGCATCTG        | TGCCACTGGTGTAGAAATACTCCTT    | FAM-CTCGGACACACACCCTGCTGCT-BHQ1           |
| <i>IFIT2</i>  | TGCCGAACAGCTGAGAATTG       | CGTAGGCTGCTCTCAAGGA          | FAM-CTCACTCATGGTTGCAGT-MGB                |
| <i>IL6</i>    | TGGATGCTTCCAATCTGGATT      | TGCACAGCTCTGGCTTGTC          | FAM-CCAGTGATGATTTTCACCAGGCAAGTCTC-BHQ1    |
| <i>IL8</i>    | AGCTGGCCGTGGCTCTCT         | TTAGCACTCCTTGCCAAACTG        | FAM-CTTCACACAGAGCTGCAGAAATCA-TAMRA        |
| <i>PD-L1</i>  | CTTGGTAATTCTGGGAGCCATCTATT | CCTCCAAATGTGTATCACTTTGCTTCT  | FAM-TGCCTTGGTGTAGCACTGACATTCATCTTCCGTBHQ1 |
| <i>TNFAP3</i> | GACCATGGCACAACTCATCTC      | CAAAGTAATCATCTACCAGATTGATTTC | FAM-AGCTTCATCCAACCTTTCGGGCATTGA-BHQ1      |
| <i>CSF2</i>   | AGTCATCTCAGAAATGTTTGACCTC  | CAAGGGGCCCTTGAGCTT           | FAM-AGCCGACCTGCCTACAGACCCGC-BHQ1          |
| <i>PPIA</i>   | ACGGGTCCTGGCATCTTG         | TTGCCAAACACCACATGCTT         | CAL-CCCAGTTTTTCATCTGCACTGCCAAGA-BHQ1      |

<sup>1</sup> 6-Carboxyfluorescein (FAM); Carboxytetramethylrhodamine (TAMRA); CAL Fluor® Gold540 (CAL); black hole quencher 1 (BHQ1); and minor groove binding (MGB)

**Supplemental Table S3.** Oligo sequences used for qRT-PCR validation of expression of genes encoding *CCL5*, *IFIT2*, *IL6*, *IL8*, *TNFAP3*, *PD-L1*, *CSF2* and *PPIA*. Forward and reverse coding oligo sequences used for qRT-PCR validation of genes *CCL5*, *IFIT2*, *IL6*, *IL8*, *TNFAP3*, *PD-L1*, *CSF2* and *PPIA* are shown along with their probe.

**Table S4.** p-values and correlation values for micro array data compared to qRT-PCR data and qRT-PCR data between A2497 and A2497P

| Gene           | 24 h                                                  |                                    |                                               | 48 h                                                  |                                    |                                               | 72 h                                                  |                                    |                                               |
|----------------|-------------------------------------------------------|------------------------------------|-----------------------------------------------|-------------------------------------------------------|------------------------------------|-----------------------------------------------|-------------------------------------------------------|------------------------------------|-----------------------------------------------|
|                | qRT-PCR<br>A2497 vs<br>A2497P <sup>-</sup><br>p-value | qRT-PCR<br>vs Array<br>correlation | qRT-PCR<br>vs Array<br>correlation<br>p-value | qRT-PCR<br>A2497 vs<br>A2497P <sup>-</sup><br>p-value | qRT-PCR<br>vs Array<br>correlation | qRT-PCR<br>vs Array<br>correlation<br>p-value | qRT-PCR<br>A2497 vs<br>A2497P <sup>-</sup><br>p-value | qRT-PCR<br>vs Array<br>correlation | qRT-PCR<br>vs Array<br>correlation<br>p-value |
| <i>CCL5</i>    | 0.0239                                                | 0.75                               | -                                             | 0.0320                                                | 0.74                               | 0.0346                                        | 0.0052                                                | 0.82                               | 0.01340                                       |
| <i>IFIT2</i>   | 0.0009                                                | -                                  | -                                             | 0.0042                                                | -                                  | -                                             | 0.0116                                                | 0.87                               | 0.00450                                       |
| <i>IL6</i>     | -                                                     | -                                  | -                                             | 0.0006                                                | 0.92                               | 0.0014                                        | 0.0001                                                | 0.87                               | 0.00550                                       |
| <i>IL8</i>     | 0.0144                                                | -                                  | -                                             | < 0.0001                                              | 0.52                               | -                                             | < 0.0001                                              | 0.98                               | 0.00001                                       |
| <i>PD-L1</i>   | -                                                     | -                                  | -                                             | -                                                     | 0.75                               | 0.0339                                        | 0.0345                                                | 0.83                               | 0.01160                                       |
| <i>TNFAIP3</i> | 0.0460                                                | 0.67                               | -                                             | 0.0368                                                | -                                  | -                                             | 0.0037                                                | 0.91                               | 0.00160                                       |
| <i>CSF2</i>    | -                                                     | -                                  | -                                             | 0.0507                                                | -                                  | -                                             | 0.0004                                                | 0.9                                | 0.00200                                       |

**Supplemental Table S4.** p-values and correlation values for microarray data compared to qRT-PCR data and qRT-PCR data between A2497 and A2497P<sup>-</sup> infected cells. Three columns are shown for each late time point (24, 48, 72 h). Column one is the p-value for qRT-PCR data for the gene shown in significant differential expression analysis for the A2497 vs. A2497P<sup>-</sup> comparison. Column two is the correlation (Pearson) between qRT-PCR data and array data. Column three is the P-value for the correlation (Pearson) between qRT-PCR and array data. Cells with no number indicates that no p-value significance in qRT-PCR data comparisons (A2497 vs. A2497P<sup>-</sup>) was found, no correlation greater than 0.5 was found, or no p-value was generated in the qRT-PCR vs. microarray correlation analysis.
